# Supplementary material
Source: PubMed Central journal article supplement (PMC5933332)
Supplement: jama-319-1444-s001.pdf [file jama-319-1444-s001.pdf]

**Supplement 1 to "The State of US Health: Burden of Diseases, Injuries, and Risk Factors among US states, 1990-2016"**

This supplement provides further methodological detail on GBD estimation, as well as cause specific estimation. We have also produced a second appendix of supplemental results, including state-specific tables and figures.

## Table of Contents

Section 1. GBD Overview

Section 2. GBD 2016 causes of death database

Section 3. Causes of death modeling methods

Section 4. Central computation

Section 5. Nonfatal outcome estimation

Section 6. Risk factor estimation

Section 7. Methods on the attribution of deaths to causes

Section 8. Modeling specific methods on causes of death estimation

Section 9. Modeling specific methods on nonfatal estimation

Section 10. Modeling specific methods on risk factor estimation

## Section 1. GBD Overview

### Section 1.1. Locations of the Analysis

The locations included in GBD 2016 have been arranged into a set of hierarchical categories composed of seven super-regions and a further nested set of 21 regions containing 195 countries and territories. The locations for which GBD estimated global, regional, and national cause-specific mortality and years of life lost (YLLs) have not expanded following GBD 2015. New subnational locations estimated for GBD 2016 are the local government areas of England and provinces of Indonesia. Subnational assessments for GBD 2016 include 26 states and one federal district for Brazil, 33 provinces and municipalities for China, nine regions and 150 local government areas for England, 31 states and union territories by urbanicity for India, 34 provinces for Indonesia, 47 prefectures for Japan, 47 counties for Kenya, 31 states and one federal district for Mexico, two areas for Sweden, nine provinces for South Africa, 13 states for the Kingdom of Saudi Arabia, and 50 states and one federal district for the United States. Combined, there are a total of 335 locations at the first subnational unit level. Included in subnational Level 1 locations are countries that have been subdivided into the first subnational level, such as states or provinces, for the GBD analysis; subnational Level 2 only applies to India and England. For this paper we present data at the national and territory level.

### Section 1.2. Time Period of the Analysis

A complete set of cause-specific mortality and years of life lost (YLL) numbers and rates were computed for the years 1980–2016.

All GBD 2016 results and online data visualisations are available at <http://vizhub.healthdata.org/gbd-compare> with access to results for all GBD metrics.

### Section 1.3. Statement of GATHER Compliance

This study complies with the Guidelines for Accurate and Transparent Health Estimates Reporting (GATHER) recommendations. We have documented the steps involved in our analytical procedures and detailed the data sources used in compliance with the Guidelines for Accurate and Transparent Health Estimates Reporting (GATHER). See Appendix Table 1 for the GATHER checklist.

The GATHER recommendations may be found here: <http://gather-statement.org/>

### Section 1.4. List of abbreviations

BTL: basic tabulation list

CDR: crude death rates

CHERG: Child Health Epidemiology Research Group

CKD: chronic kidney disease

CKD-DM: chronic kidney disease deaths attributable to diabetes

COD: causes of death

CODEm: cause of death ensemble modelling

COPD: chronic obstructive pulmonary disease

CR: cancer registry

CVD: cardiovascular disease

DALY: disability-adjusted life-year

DSP: Disease Surveillance Points

ELISA: enzyme-linked immunosorbent assay

EPEC: enteropathogenic *E. coli*

EPP: Estimation and Projection Package

ETEC: enterotoxigenic *E. coli*

GATHER: Guidelines for Accurate and Transparent Health Estimates Reporting

GBD: Global Burden of Disease

GEMS: Global Enteric Multicenter Study

GHDx: Global Health Data Exchange

Hib: *Haemophilus influenzae* type B

HIV CDR: Crude death rate due to HIV/AIDS

IARC: International Agency for Research on Cancer

ICD: International Classification of Disease

IHD: ischemic heart disease

LDI: lag distributed income per capita

LRI: lower respiratory infection

MAP: Malaria Atlas Project

MCCD: Medical Certification of Causes of Death

MCEE: Maternal and Child Epidemiology Estimation group

MI: mortality/incidence ratio

MM: maternal mortality

MMR: maternal mortality ratio

MMS: Maternal Mortality Surveillance

NCD: non-communicable disease

PAF: population-attributable fraction

RMSE: root mean square error

RSV: respiratory syncytial virus

SBH: summary birth history  
SCD(R): Survey of Causes of Death (Rural)  
SDI: Socio-demographic Index  
SEER: Surveillance, Epidemiology, and End Results Program  
SRS: Sample Registration System  
ST-GPR: spatiotemporal Gaussian process regression  
TAC: TaqMan Array Card  
TB: tuberculosis  
UI: uncertainty interval  
UN: United Nations  
VA: verbal autopsy  
VR: vital registration  
WHO: World Health Organization  
YLD: years lived with disability  
YLL: years of life lost

### Section 1.5. GBD results overview

Results from the Global Burden of Disease Study (GBD 2016) are now measured in terabytes. Results are available in an interactive data downloading tool on the Global Health Data exchange (GHDx). The tool contains the complete set of results from all summary papers; however, specialised tables from the papers are available as separate entries in the GHDx as were made available for GBD 2015.

The current version of the data download tool is available in the GHDx and contains core summary results for the Global Burden of Disease Study 2016 (GBD 2016): <http://ghdx.healthdata.org/gbd-results-tool>. The core summary results include deaths, YLLs, YLDs, and DALYs. It includes data for causes, risks, cause-risk attribution, aetiologies, and impairments.

In the GBD 2016 version, the tool also contains measures such as prevalence and incidence as well as rate of change data. Data above a certain size cannot be viewed online but can be downloaded. Depending on the size of the download, users may need to enter an email address and a download location will be sent to them when the files are prepared.

### Section 1.6. Data input sources overview

GBD 2016 incorporated a large number and wide variety of input sources to estimate mortality, causes of death and illness, and risk factors for 195 countries and territories from 1990 to 2016. These input sources are accessible through an interactive citation tool available in IHME's GHDx.

Users can retrieve citations for a specific GBD component, cause or risk, and location by choosing from the available selection boxes. They can then view and access GHDx records for input sources and export a CSV file that includes the GHDx metadata, citations, and information about where the data were used in GBD.

Additional metadata for each input source are available through the citation tool, as required by the GATHER statement.

The citation tool is accessible through the GHDx at <http://ghdx.healthdata.org/global-burden-disease-study-2016>

### Section 1.7. Funding Sources

Funding for this research was provided by the Bill & Melinda Gates Foundation.

## Section 2: GBD 2016 causes of death database

### 2.1 Background

Appendix Figures 1 and 2 show the high-level view of data inputs, analytical steps, and outputs of the cause of death analysis frame. Section 2 of this appendix provides details on each step in the development of the causes of death database as illustrated in Appendix Figure 1. The complexity of the overall process can be usefully divided into three broad phases: data inputs on the event of death going into the cause of death database that are analysed using CODEm; data inputs on precursors to death that are modelled through a variety of strategies; and the integration of these streams of analysis into a single set of cause of death estimates by age, sex, year, and geography with uncertainty through the CodCorrect algorithm. The process for cancer and for HIV/AIDS is somewhat different and is described in more detail in Section 3.

### 2.2 Cause of death data identification

#### 2.2.1 Overview of data types

The cause of death database contains seven types of data sources: vital registration, verbal autopsy, cancer registry, police records, sibling history, surveillance, and survey/census. The highest-quality data will have detailed characteristics of each demographic group and detailed causes of death across the time series. Data from countries with complete vital registration systems are considered to be high-quality. For countries with incomplete vital registration systems, vital statistics for causes of death can be supplemented with other data types to provide cause-specific estimates.

#### 2.2.2 ICD detail

A majority of the cause of death data is vital registration data obtained from the WHO Mortality Database, country-specific mortality databases operated by official offices, or provided by trusted country collaborators. It is considered to be the highest-quality data, as it is the most comprehensive. Each cause is coded directly to the most detailed cause of death when possible, whereas cause codes in ICD-tabulated data are coded to aggregated cause groups. The cause of death database contains 12,879 location-years of detailed data from 1980 to 2016, which includes underlying causes of death coded with 3-5 digit codes, by country, year, sex, and age groups. Detail causes are coded to one of the following ICD detail coding systems: ICD8, ICD9, or ICD10. Each coding system has a similar cause hierarchy and cause list that has continually developed over time. ICD10 is the current standard and the most exhaustive cause list. Within the cause lists, 5-digit codes are truncated to 4-digit codes to condense the cause lists. Updates to ICD detail occur biannually as WHO releases new versions or as country collaborators provide additional data. Updates to data from WHO increasingly include ICD10 cause of death data, as it is the most current classification of cause of death, while updates to ICD8 and ICD9 detailed lists are less common. In the case of overlapping data, preference is given to data from pre-determined country

collaborators, which are updated annually.

### 2.2.3 ICD tabulations lists

The ICD tabulation lists include the ICD8 List A (ICD8A), ICD9 Basic Tabulation List (BTL), ICD10 Mortality Tabulation, Russia Tabulation list, and India Medical Certification of Cause of Death (MCCD). These data sources make up 1,729 location-years from 1980 to 2016 in the cause of death database. All are condensed versions of the ICD9 and ICD10 detail lists, with some differences in the format of cause lists depending on the data source. ICD8A, ICD9 BTL, and ICD10 Mortality Tabulation cause of death are assigned to subtotal groups, referred to as chapters, and cause groups respective to ICD detail groups. Additionally ICD9 BTL includes ICD9 detail codes for some cancers and a custom tabulation scheme for the former USSR countries. The Russia Tabulation lists and India MCCD cause lists each have custom nomenclatures based on ICD detail cause codes.

Two of the drawbacks in data using tabulation lists are discrepancies in the accuracy of death counts and lack of detail to due to aggregated cause groups. There are instances where the sum of deaths in chapter subtotals are not equal to the sum of cause groups within the chapter. To account for any missing or duplicate deaths reported within the cause groupings, death counts are systematically adjusted, by calculating the differences between subtotals and sub-causes within the cause groups. Any differences are assigned to a remainder cause group. To account for the lack of cause code detail, select cause groups are disaggregated (Step 1.1) to create a complete cause list. Updates to ICD Tabulation lists obtained from WHO occur less frequently compared to ICD detailed lists, as more countries are reporting deaths in ICD detail. In instances of overlapping data, preference is given first to data from country collaborators' data from WHO, then to ICD detail data from WHO, before choosing to use ICD tabulation lists.

### Surveys and censuses reporting fraction of deaths due to selected injuries

Surveys and censuses are often used in countries with less developed vital registration systems, or in countries with adequate vital registration these data sources are supplementary. Much like the verbal autopsies, the validity of cause of death is a concern due to lack of medical certification at the time of death. For these data sources we keep only causes related to maternal mortality and injuries. The remaining causes are accounted for as a remainder of total deaths in the sample size.

### Police records

In most countries, police and crime reports are an important source of information for some types of injury deaths, notably road injuries and interpersonal violence. Our police data come from reports on road traffic and crime trends. The police reports used in this analysis were obtained from published studies, national agencies, and institutional surveys such as the UN Crime Trends survey and United Nations Office on Drugs and Crime Global study on Homicides. We can assess whether police reports were likely to be complete and cover the entire country if police trends are close to trends seen in vital registration. Data are excluded in instances where police data for road traffic injuries are significantly lower than our vital registration. The threshold for exclusion is less than 80% of the cause fraction of the road traffic injuries in vital registration. Police data that meet our inclusion criteria and provide complete coverage are uploaded to the database for injuries causes.

## 2.2.6 Population-based cancer registries

### Cancer registries with incidence

Data on cancer incidence were sought from individual population-based cancer registries as well as from databases that include multiple registries, for example “Cancer Incidence in Five Continents” (CI5), NORDCAN, or EUREG. Cancer registries were identified through the membership list of the International Association of Cancer Registries (IACR), through the GBD collaborator network, or through the GHDx. Registries were excluded if they were not representative of the coverage population, if they did not contain incidence data tabulated by cancer site, if the data were limited to years prior to 1980, if the source did not provide details on the population covered, or if the list of cancer sites included was not comprehensive.

### Cancer registries with incidence and high-quality mortality data

In addition to incidence, some high-quality cancer registries also report cancer mortality data. These data were also extracted and used as inputs to the mortality-to-incidence model.



### 2.3 Step 1. Standardise input data

The input data to the cause of death (CoD) database are received in various formats and must be standardised to run through central CoD machinery to then upload to the database. Raw data inputs come from data sources such as mortality databases, literature reviews, or reports. Usable data sources must have a clear sample size of the number of deaths in the population and exhaustive cause lists. The complexity of the data cleaning process varies drastically across data sources. For vital registration micro-data with the location, age, sex, year, and ICD-coded cause of every death, very little effort is necessary to standardise it into a consistent structure. Other sources may require weeks of careful review to accurately extract scans of hardcover cause of death reports into spreadsheets that can be transformed and standardised.

At this point, data are assigned source identifiers so that they can be linked to the Global Health Data Exchange (GHDx) and cited appropriately. Any aggregate age and sex categories are flagged for age-sex splitting. The methods of cause-of-death assignment and data collection are reviewed to determine which source type to assign; for example, we distinguish sibling history data from surveys with a verbal autopsy module. Only data at the most detailed level of the Global Burden of Disease location hierarchy are used. Documentation from the source is reviewed to determine if the population is representative of the location or only a subset of the population in that location. Data sources representing a subset of the population are flagged as non-representative; this flag is used by CODEm to increase the variance associated with such data points.

Finally, diagnostics are reviewed at this stage to avoid sending cleaning errors downstream. We review cause-specific deaths for each demographic group to ensure the data are reasonable. For example, it is unlikely that male breast cancer deaths are higher than female breast cancer or deaths from neonatal causes occur in age groups over one year. All deaths totals are compared with the sum of cause-specific deaths to ensure the observed deaths are accounted for and sample size is complete.

#### Step 1.1 Disaggregation

Causes of death in tabulated vital registration data are condensed into aggregated groups, some of which can be mapped directly to GBD causes while other aggregated cause groups are not informative and cannot be mapped to GBD causes. To correct for this, aggregated causes were mapped and split onto multiple ICD8, ICD9 and ICD10 detail causes, or targets, based on the ICD groupings within the aggregated causes. ICD8, ICD9 and ICD10 detail codes serve as targets because they are the highest-quality vital registration data and enable the calculation of proportions used to split the aggregated cause data into detailed causes. The proportions of deaths from nearby countries within the super-region were used to fill in data gaps as they were likely to have similar cause of death trends.

We determined the targets based on detail causes missing from the tabulated cause list. For example, in ICD9 BTL, the tabulated cause list includes a viral diseases group. In the hierarchy of causes, this group consists of measles, yellow fever, encephalitis, hepatitis, rabies, other infectious diseases, garbage code, and remainder of viral diseases. We did not consider this list to be an exhaustive list of viral diseases based on the range of ICD detail codes given in the ICD9 BTL documentation. To make the cause list exhaustive and inclusive of other viral diseases, we split the remainder of the viral diseases group into other meningitis, other infectious diseases, herpes, dengue, other neglected tropical diseases, and garbage code. After a list of targets was determined, the aggregated deaths were disaggregated to the target causes using ICD8, ICD9, and ICD10 detail proportions generated at the super-region level for the corresponding sex and age groups across all years in the time series. For example, in ICD9 detail data, 54.8% of deaths in males in Latin America and the Caribbean within the target group for BTL Viral Diseases

were designated “other meningitis”, so 54.8% of deaths in the tabulated group “remainder of viral diseases”, were assigned to “other meningitis” for any country within that particular super-region. For any cause and demographic group where we lacked ICD detail, global proportions were used.

### Step 1.2 State splitting

Two sources for cause of death estimation in India are the Medical Certification of Causes of Death (MCCD) report, which reports medically certified deaths from health facilities in mostly urban areas<sup>4</sup>, and the Survey of Causes of Death (SCD), which collects information via verbal autopsy on about one-half of 1% of all rural deaths in India, based on populations living in about 1,300 primary health care centers spread throughout the country.<sup>5</sup> For both of these reports, data missingness impedes estimation of trends at the state level. We used a first-order, log-linear model of the four-way contingency table of deaths by sex, age, state, and year to estimate the missing state-years. We fit the model to all available data for MCCD and SCD separately for each cause, including state-specific all-age measurements and age-specific national measurements. From this, we produced estimates for each combination of sex, age, state, and year. We then used these estimates wherever the raw data did not include sex-, age-, and state-specific death counts.

For MCCD, the model was fit separately for ICD10- and ICD9-based reports using the tabulated cause list present in the data. In the SCD report, the model was fit for each GBD cause in the data. As data from the SCD reports were relatively sparse, the pooling of like causes together led to an improved model fit.

### Step 1.3 Calculate non-maternal deaths

In cases when maternal mortality metrics do not include both deaths due to maternal causes and deaths due to non-maternal causes for women of reproductive age, live births and all-cause mortality estimates can be used to calculate deaths. Many studies report maternal deaths as the maternal mortality ratio (MMR). MMR is the number of maternal deaths per 100,000 live births and can be used to calculate deaths when it has been derived from primary data and not estimated. Maternal deaths were calculated using MMR and live births; if live births were missing we substituted live birth estimates and used the following equation:

$$\text{Maternal deaths} = (\text{MMR}/100,000) * \text{Live births}$$

If a study was non-representative we extracted sample size and live births from that study. After maternal deaths were calculated, we used the difference from all-cause mortality estimates to determine non-maternal deaths.

A more accurate and data-inclusive method of calculating maternal and non-maternal deaths incorporates coverage and splits deaths for a range of years into individual years. If there were live births in the study we adjusted the coverage.

$$\text{Coverage} = \text{live births} / \text{GBD-estimated live births}$$

After coverage was calculated, totals deaths were scaled to be more representative. This gives a more accurate death count since the envelope assumes representative coverage. Using all-cause mortality as an all-cause total, non-maternal deaths were subsequently calculated.

$$\text{Maternal envelope with coverage} = \text{maternal envelope} * \text{coverage}$$

An additional adjustment can be applied to maternal data spanning over a range of consecutive years, which allows for more data inclusion. The years within specified year ranges are separated into individual

years, and total deaths within the year range were split between each individual year using the fixed proportions of maternal deaths from vital registration in that particular country. We only used vital registration to inform the proportions because it was both high-quality and representative.

#### 2.4 Step 2. Map to GBD cause list

In GBD 2016 we used 536 maps to translate causes found in the input data to the GBD 2016 cause list. This included 38 maps for vital registration data, 354 for verbal autopsy data sources, and 144 for other data types. The largest and most universal maps used were those for ICD9 and ICD10 detail vital registration data. The input data causes varied from 3-4 digit ICD codes to custom cause lists with cause names such as cholera or hepatitis. Our mapping process made it possible to compare these various data sources across demographic groups.

In GBD 2016, we developed additional maps to translate ICD codes found in the input data that are non-underlying causes to appropriate target codes based on the levels of the GBD cause list. These garbage codes were mapped to Levels 1-4 of the GBD cause list according to the following criteria:

1. Level 1 includes all garbage codes for which a Level 1 GBD cause cannot be directly assigned. For example, the underlying causes of sepsis or peritonitis, if not specified in the data, could be an injury, a non-communicable disease, or a type of communicable disease. In these cases, deaths will be redistributed across all three of these Level 1 causes. In addition, deaths coded to impossible or ill-defined causes of death, including senility and unspecified causes, fall into this category, as they will be redistributed onto all causes.
2. Level 2 includes all garbage codes that can be assigned to one specific Level 1 cause in the GBD cause list. This would include deaths coded to unspecified injuries (X59), which are redistributed onto all injuries.
3. Level 3 includes all garbage codes for which we know the Level 2 cause of death, and can redistribute onto Level 3 causes. This includes deaths coded to causes such as unspecified cardiovascular disease, which falls within the Level 2 cause cardiovascular diseases, as well as those coded to unspecified cancer site, which falls within the Level 2 neoplasms cause.
4. Level 4 includes all garbage codes for underlying causes of death that can be redistributed within a Level 3 cause. This includes garbage codes such as “unspecified stroke” or “unspecified road injuries.”

Appendix Table 3 shows the ICD10-detail and ICD9-detail codes included in the mapping of each GBD cause. This includes the ICD10-detail and ICD9-detail codes that were mapped to garbage Levels 1-4 as well.

### 2.5 Step 3. Age-sex splitting

Different sources, particularly verbal autopsy studies, report deaths for a wide range of age groups with varying intervals. For the analysis of causes of death, we mapped these different age intervals to the GBD standard set of age groups. The approach to undertake this mapping was the same as in the prior GBD studies, GBD 2015, GBD 2013, and GBD 2010.

In the process of assembling a consolidated demographic database, perhaps the most impairing source of inconsistency is the aggregation of age groups. It is conventional to report such data in broad age groupings such as “0-4, 5-14, 15-49,” or to report data with both sexes together. The issue of comparability between age-sex groups arose when assembling the GBD cause of death database. The compiled database included 22 distinct tabulation formats for infants and 141 distinct tabulation formats for non-infants. We developed a tool, which we call age-sex splitting, that takes aggregated age groupings, and likewise the “both sexes combined” grouping, and divides them into what their constituent age groups would likely have been using respective cause-specific and country-specific age distributions. The analytical framework for GBD includes three infant age categories: Early neonatal (0-6 days), late neonatal (7-27 days), and post-neonatal (28 days to 1 year), and 17 non-infant age categories starting with age 1-4 years, then proceeding in five-year age groups until the terminal age group of 95+. We treat unknown ages and sexes in the same manner we treated the “all ages combined” age category and “both sexes combined” sex group. Through this process, we were able to directly compare all data sources on even terms.

The approach to age splitting is based on the following formula. The key assumption underlying this formula is that the relative risk of death by age group compared to a reference age group is invariant across populations. While this assumption is likely violated in specific cases, there is a strong biologically based pattern of the relative risk of death for a cause by age that is observed for most causes. The basic formula is as follows:

$$D_a = R_a N_a \left( \frac{D_a^{a+x}}{\sum_a^{a+x} (R_a N_a)} \right)$$

Where:

$D_a$  = the number of deaths from a cause in age group  $a$

$R_a$  = the relative risk of death in age group  $a$  compared to a reference group

$N_a$  = the country-year-sex-specific population in age group  $a$

$D_a^{a+x}$  = the number of deaths in the age group  $a$  to  $a+x$

With the assumption of invariant relative risks of death by age with respect to a reference age group, this equation can be used, along with population distribution by age, to split an aggregate number of deaths for the age groups  $a$  to  $a+x$  into specific deaths for each age group within the aggregate interval.

In some cases, deaths are reported for an aggregate age group for both sexes combined. The task in this case is more complicated, but the same principle can be applied. In this case we assumed that the relative risks of death by and sex are constant.

$$D_{as} = R_{as} N_{as} \left( \frac{D_{as}^{a+x,s}}{\sum_a^{a+x} (R_{as} N_{as})} \right)$$

Where:

$D_{as}$  = the number of deaths from a cause in age group  $a$ , sex  $s$

$R_{as}$  = the relative risk of death in age group  $a$  compared to a reference group for sex  $s$

$N_{as}$  = the country-year-sex-specific population in age group  $a$  for sex  $s$

$D_a^{a+x,s}$  = the number of deaths in the age group  $a$  to  $a+x$  for sex  $s$

This equation can be used to split data aggregated over age and sex. The assumption, however, of invariant relative risks across age and sex is a stronger assumption. Fortunately, data pooled across sexes are less common in the published or unpublished cause of death data.

The relative risk of death in a particular age group for a given sex is derived from the global distribution of cause-specific mortality rates found in available vital registration data. Location-years from the following code systems are used, provided they report the requisite age- and sex-detail: ICD7, ICD8, ICD9 BTL, ICD10 tabulated, ICD9, and ICD10. Upon compiling these data, we mapped them to GBD causes, and aggregated up to cause Level 3. This is the level at which a particular cause is split – that is, any daughter cause of a Level 3 parent is split using the age distribution of that parent (so, chronic kidney disease due to diabetes would be split using the age pattern of chronic kidney disease).

We next adjusted separately for estimated adult and child vital registration completeness. Location- year-age-sex-specific deaths and population were then aggregated across all location-years, in order to produce cause-specific mortality rates by age and sex. These were used to determine the risk of death at any age relative to any reference age group.

## 2.6 Step 4. Correct age-sex violations

Occasionally, data sources will include deaths by a cause for which there is medical consensus that death is impossible for the sex and age. For example, there may be some number of deaths due to cervical cancer in males, or deaths due to maternal causes in ages under 10. We have constructed a conservative list of age-sex restrictions. When deaths violate these restrictions, we redistribute them proportionally onto all causes.

### Step 4.1 GBD age-sex restrictions by cause

All restrictions are included in Appendix Table 4, Restrictions on age and sex by cause for GBD 2016.

## 2.7 Step 5. Redistribution

A crucial aspect of enhancing the comparability of data for cause of death is to deal with uninformative, so-called garbage codes. Garbage codes are codes to which deaths were assigned that cannot or should not be considered as the underlying cause of death, for example: heart failure, ill-defined cancer site, senility, ill-defined external causes of injuries, and septicaemia. The methods for redistributing these garbage-coded deaths were outlined in detail in Naghavi et al<sup>6</sup>, and the underlying algorithm for redistributing deaths assigned to these codes has not changed since GBD 2013.

### Step 5.1 Redistribute HIV-related garbage codes

Due to the disparate nature of HIV/AIDS mortality across space and time, dynamic redistribution of HIV/AIDS-related garbage codes was needed. To inform this redistribution, we generated target proportions for each garbage group by age band (Under 1 month, 1-59 months, 5-19 years, 20-49 years, 50-59 years, 60-69 years, 70-79 years, and 80+ years), five-year time interval, and sex. The garbage groups will either target HIV or a remainder target. The allotment of deaths to either of these is based on the regional increase in the mortality rate of all codes in the group relative to the rates seen in 1980–1984 – an increase greater than 5% is assumed to be HIV/AIDS-related, and the proportion of those deaths exceeding 5% are redistributed to HIV/AIDS. Any increase  $\leq 5\%$  is then assigned to the remainder target.

### Step 5.2 Regress garbage codes versus non-garbage codes

As in GBD 2015, the statistical analysis used to determine proportions for garbage code redistribution for ill-defined cancer sites, ill-defined external causes of injury, unspecified stroke, heart failure, hypertension, and atherosclerosis was based on the approach outlined by Ahern et al.<sup>7</sup> For each redistribution package, we defined the “universe” of data as all deaths coded to either the package’s garbage codes or the package’s redistribution targets for each country, year, age, and sex. We then ran a regression based on the following equation, separately for each target group and sex:

$$TG_{crt} = \alpha + \beta_1 Gar_{crt} + \beta_2 Age_{crt} Gar_{crt} + \theta_r Gar_{crt} + \gamma_r + \varepsilon_{ct}$$

$TG_{crt}$  = percentage of deaths within the given garbage code’s universe which were coded to a given target group, by country

$Gar_{crt}$  = percentage of deaths within the given garbage code’s universe which were coded to a given set of garbage codes

$\alpha$  = constant

$\beta_1$  = slope coefficient describing the association between  $Gar_{crt}$  and  $G_{crt}$

$\beta_2$  = slope coefficient describing the association between the interaction  $Age_{crt} Gar_{crt}$  and  $G_{crt}$

$\gamma_r$  = region-specific random intercept (or super-region if the random effect on region is not significant)

$\theta_r$  = region-specific random slope (or super-region if the random effect on region is not significant)

$\varepsilon_{ct}$  = standard error, normally distributed and calculated by bootstrapping

This regression was adjusted from GBD 2013 to include fixed effects on the interaction of garbage and age to ensure smooth age patterns. We made this decision after investigating diagnostic visualisations that showed unlikely gaps between proportions assigned to different age groups.

Once proportions were produced for each country, sex, age, and target group, certain adjustments were made to conform our packages to the best medical evidence available. In some cases, we implemented

restrictions on the proportions that the regressions could yield. For example, we did not allow any redistribution onto Chagas disease outside of Latin America and the Caribbean, or suicide under the age of 15. In other cases, we capped the proportion for some targets to the level that would be produced from proportional redistribution; for example, haemoglobinopathies and haemolytic anaemias were restricted to the level of proportional redistribution in the redistribution of left heart failure. Occasionally, further adjustments were made on a case-by-case basis per country, age, sex, and target group to suppress the impact of outliers based on existing epidemiological evidence and expert judgment.

#### Development of an algorithm for redistribution of garbage codes based on multiple cause of death data

Multiple cause of death data are a form of individual record causes of death data which include an underlying cause of death along with other causes in the death chain, including intermediate and immediate causes. By analysing this type of data, we can sometimes find the true underlying cause of death in other cause of death data where the underlying cause is a garbage code or a misassigned cause of death.

For GBD 2016, this approach was implemented in redistribution for a few select causes. One example of this approach is seen in the correction of the misassignment of deaths due to drug overdoses to unintentional poisoning. Figure A below shows the number of deaths due to unintentional poisoning as an underlying cause of death in the United States in 2000 through 2013 by age. The accompanying table (Table A) shows the fraction of deaths assigned to unintentional poisoning as an underlying cause of death in the United States by substance or drug based on the other causes in the death chain. More than 90% of these types of poisonings are due to exposure to narcotics, psychodysleptics, and other drugs, specified or unspecified. More than 97% of these poisonings by substance or drug occurred in ages 15–65. It is clear that these are not cases of accidental ingestion of substances, but rather that the substance has been deliberately ingested, with unintentional poisoning occurring.

Figure A. Unintentional poisoning deaths in the United States, by age and year

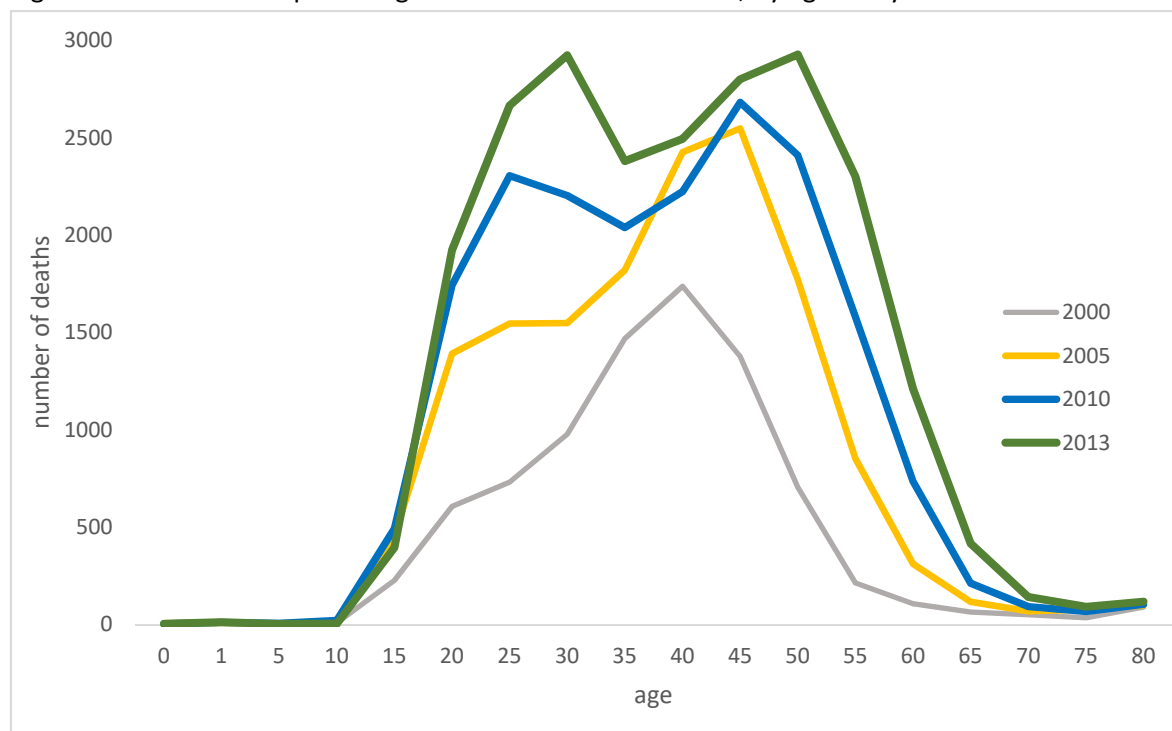

Table A. Fraction of the deaths assigned to unintentional poisoning in the United States by substance or drug

| ICD 10 code | ICD 10 definition                                                                                                                            | Fraction |
|-------------|----------------------------------------------------------------------------------------------------------------------------------------------|----------|
| X42         | Accidental poisoning by and exposure to narcotics and psychodysleptics not elsewhere classified                                              | 47.7%    |
| X44         | Accidental poisoning by and exposure to other and unspecified drugs, medicaments and biological substances                                   | 42.9%    |
| X41         | Accidental poisoning by and exposure to antiepileptic, sedative-hypnotic, anti-parkinsonism and psychotropic drugs, not elsewhere classified | 8.4%     |
| X49         | Accidental poisoning by and exposure to other and unspecified chemicals and noxious substances                                               | 0.5%     |
| X40         | Accidental poisoning by and exposure to non-opioid analgesics, antipyretics and anti-rheumatics                                              | 0.5%     |
| X43         | Accidental poisoning by and exposure to other drugs acting on the autonomic nervous system                                                   | 0.1%     |

Using multiple cause of death records for the United States, Mexico, Brazil, and Australia from 1980 to 2014, we selected all deaths with underlying causes coded to X40–X44 and X49. Table B, below, shows the combination of other potential causes that can be found in the multiple cause of death data for these underlying causes. Based on this table, we proportionally redistributed misassigned unintentional poisoning deaths to one of these causes. The main assumption behind this algorithm is the dominance of the fatality of some substances when considering a combination of drugs. Given the combination of different drugs and substances in these codes, opium is the main cause of fatality.<sup>8,9</sup> Other substances, like cocaine, methamphetamine, and alcohol with cannabis are less likely to be dominant in fatality.<sup>10</sup>

Table B. Algorithm for the selection and assignment of a substance or drug use cause of death for deaths coded to an underlying cause of unintentional poisoning using multiple cause of death data

| Selection Algorithm               |         |                                   |                        |                        |                                   |                                   |
|-----------------------------------|---------|-----------------------------------|------------------------|------------------------|-----------------------------------|-----------------------------------|
|                                   | Opioids | Cannabis                          | Cocaine                | Amphetamines           | alcohol                           | Psychoactive and psychedelic drug |
| Opioids                           | Opioids | Opioids                           | Opioids                | Opioids                | Opioids                           | Opioids                           |
| Cannabis                          | Opioids | Cannabis                          | Cocaine                | Amphetamines           | alcohol                           | Psychoactive and psychedelic drug |
| Cocaine                           | Opioids | Cocaine                           | Cocaine                | Amphetamines + Cocaine | Cocaine + alcohol                 | Cocaine                           |
| Amphetamines                      | Opioids | Amphetamines                      | Amphetamines + Cocaine | Amphetamines           | Amphetamines + alcohol            | Amphetamines                      |
| alcohol                           | Opioids | alcohol                           | Cocaine + alcohol      | Amphetamines + alcohol | alcohol                           | Psychoactive and psychedelic drug |
| Psychoactive and psychedelic drug | Opioids | Psychoactive and psychedelic drug | Cocaine                | Amphetamines           | Psychoactive and psychedelic drug | Psychoactive and psychedelic drug |



For example, if the multiple cause of death data show that 40% of deaths include opioid use disorders as an intermediate cause where the underlying cause is X40–X44, X49, the redistribution proportion for opioid use disorders will be exactly 40% due to the dominance of the fatality of opioid use disorders compared to other drugs in the above table. Similarly, because cannabis is not assumed to have dominance of fatality compared to any of the above drug use disorders, the proportion of X40–X44, X49 redistributed to cannabis use disorders was the percentage of deaths in the multiple cause of death data that had only cannabis use disorders as an intermediate cause and none of the other above causes. If 40% of deaths had cannabis use disorders listed in the intermediate cause list, but those 40% also had one or more of opioids, cocaine, amphetamines, alcohol, or psychoactive and psychedelic drugs, the redistribution proportion to cannabis use disorders would be 0%.

Multiple cause of death data were only available to us for the United States, Brazil, Mexico, and Australia. Because of this limited sample, we applied the result from multiple cause of death analysis from the United States to the United States and Canada, from Brazil and Mexico to Latin America and the Caribbean, and from Australia to Australia, New Zealand, and Western Europe. For other locations, we aggregated the results from the four countries and applied the aggregate pattern. We hope for increased availability of multiple causes of death data in future analyses in order to achieve a more precise distribution for more locations.

### Step 5.3 VA anemia adjustment

To compensate for the over-representative cause fractions from anemia found in verbal autopsy studies, we redistributed these deaths based on the causal attribution of severe anemia from the GBD 2013 study. The proportions were country-year-age-sex specific.

### 2.8 Step 6. HIV/AIDS misclassification correction

In many location-years, certain causes of death known to be comorbid with HIV/AIDS (eg, tuberculosis, other infectious diseases) are seen to have age patterns that diverge from those observed in location-years without widespread HIV epidemics, and are in fact more reflective of HIV mortality trends. In order to identify these instances, a global relative age pattern is generated using all VR deaths in countries with observed HIV prevalence less than 1% using the following:

$$RR_{asc} = R_{asc} / \bar{x}(R_{65sc}, R_{70sc}, R_{75sc})$$

Where  $RR_{asc}$  is the relative death rate for age group  $a$ , sex  $s$ , and cause  $c$ ;  $R_{asc}$  is the rate for that age group; and  $\bar{x}(R_{65sc}, R_{70sc}, R_{75sc})$  is the mean of the rates in ages 65–69, 60–74, and 75–79 for that sex and cause. This is preferable to comparing mortality rates because we are able to isolate divergence in age pattern while accounting for varying levels of overall mortality by fixing death rates to age groups that are unlikely to be confounded by the presence of HIV. Expected deaths for an identified cause were then determined to be:

$$ED_{lyasc} = \bar{x}(R_{ly65sc}, R_{ly70sc}, R_{ly75sc}) * p_{lyasc} * RR_{asc}$$

Where  $ED_{lyasc}$  are deaths for location  $l$ , year  $y$ , age group  $a$ , sex  $s$ , and cause  $c$ ;  $\bar{x}(R_{l65sc}, R_{l70sc}, R_{l75sc})$  is the mean of the rates for ages 65–69, 60–74, and 75–79 for that location-year-sex-cause;  $p_{lyasc}$  is the population for that location-year-age-sex-cause; and  $RR_{asc}$  is the global standard relative rate determined in the previous step for that age-sex-cause. The expected deaths remain attributed to that particular cause, while the difference between observed and expected are reallocated to HIV/AIDS.

### 2.10 Step 8. Restrictions post-redistribution

Some causes of death can only be reliably assigned through an autopsy by a trained physician. For example, it is unlikely that a verbal autopsy would reliably distinguish between ischaemic and haemorrhagic stroke.

This step ensures that the detail of the cause list at this point in the data prep process is reasonable given the detail of the original data source and the methods by which the cause of death was assigned. Two primary corrections are applied. First, any cause which is purely an artifact of the redistribution machinery targeting too detailed a cause is aggregated up to the parent cause. Second, a “bridge map” is applied over a certain set of sources to ensure that these sources do not contain causes which could not reliably be determined by the methodology. These two corrections are applied to ICD9-BTL, ICD10-tabulated, USSR tabulated ICD9, India MCCD reports, China-DSP-tabulated-ICD9, India SCD reports, India SRS, and all verbal autopsy sources.

### 2.12 Step 10. Cause aggregation

The cause list is organised in a top-down hierarchical format containing four levels. The first group, or Level 1, sums all causes. Following all cause-mortality are Level 2 causes, which include three broad groupings of causes of deaths: communicable, maternal, neonatal, and nutritional diseases; non-communicable diseases; and injuries. Within those Level 2 groupings are finer levels used for modelling. Level 3, or parent causes, are aggregated, meaning the mortality estimate for a parent cause in the hierarchy represents the sum of the causes under that rubric. Sub-causes within Level 3 causes – Level 4 – are more detailed. For example, the parent cause “intestinal infectious diseases” contains the three sub-causes: typhoid fever, paratyphoid fever, and other intestinal infectious diseases. Included in the parent cause estimate are deaths mapped directly to the parent and any Level 4 sub-causes. In data where there was not enough information to assign a Level 4 cause, we aggregated to the Level 3 parent cause. Exceptions to aggregating the Level 4 sub-causes to the parent are instances when certain sub-causes are not present. The United Nations Crime Trends police data only identify homicides, and aggregating homicides to injuries would not accurately represent all injuries.

### 2.13 Step 11. Remove shocks and HIV/AIDS maternal adjustments

For GBD 2016, CODEm models use an HIV/AIDS- and shock-free envelope. In order to be comparable, cause fractions must also be HIV/AIDS- and shock-free. Cause fractions were uploaded to the Causes of Death database as the number of deaths due to the cause over an adjusted sample in which the number of deaths due to HIV/AIDS, collective violence and legal intervention, and exposure to forces of nature were removed.

#### Step 11.1 Remove HIV/AIDS, shocks from denominator where HIV/AIDS in cause list

The first step to generate HIV- and shock-free cause fractions was to remove any deaths from the sample which were directly coded to HIV/AIDS, collective violence and legal intervention, or exposure to forces of nature. The resulting equation for a cause fraction uploaded to the database is simple:

$$CF_{l,t,a,x,c} = \frac{D_{l,t,a,x,c}}{D_{l,t,a,x} - D_{l,t,a,x,hiv} - D_{l,t,a,x,war} - D_{l,t,a,x,disaster}}$$

In this equation,  $CF_{l,t,a,x,c}$  is the cause fraction for a location (l), year (t), age (a), sex (x), and cause (c),  $D_{l,t,a,x,c}$  is the number of deaths observed in the sample for the same,  $D_{l,t,a,x}$  is the total number of deaths observed in the sample in the location, year, age and sex, and  $D_{l,t,a,x,hiv}$ ,  $D_{l,t,a,x,war}$ , and  $D_{l,t,a,x,disaster}$  are the number of deaths observed in the sample for HIV/AIDS, collective violence and legal intervention, and exposure to forces of nature, respectively.

Cause fractions for HIV/AIDS and shock causes were also uploaded to the database for use in separate estimation processes described by Wang et al.<sup>12</sup> In this case, cause fractions followed the standard equation, with variables following the same explanation as above:

$$CF_{l,t,a,x,c} = \frac{D_{l,t,a,x,c}}{D_{l,t,a,x}}$$

### Step 11.2 Remove HIV/AIDS deaths from maternal mortality sources

HIV-free cause fractions were also uploaded for sources on mortality due to maternal causes. In these cases, the sample of all deaths observed in the study is likely to contain some amount of deaths due to HIV/AIDS and shocks, but the sample only includes cause information on maternal deaths. To account for the presence of HIV/AIDS and shocks in the entire sample, we assumed the same proportion of total deaths due to HIV/AIDS by location, age, sex, and year as provided from the estimation of HIV/AIDS and all-cause mortality described by Wang et al.<sup>3</sup>

Maternal mortality studies were only corrected for HIV/AIDS if the sample of total deaths was provided in the data source. Where sources only provided the Maternal Mortality Rate (MMR), we applied the rate to the HIV- and shock-free envelope produced by the analysis described in Wang et al.<sup>3</sup> and thus did not need to adjust cause fractions at this point in the process.

Where a correction was applied, we applied the following equation:

$$CF_{l,t,a,x,mat} = D_{l,t,a,x,mat} * \frac{E[D_{l,t,a,x,hiv\_shock\_free}]}{E[D_{l,t,a,x}]}$$

In this equation, X is the resulting cause fraction due to maternal causes for the location (l), year (t), age (a), and sex (x);  $D_{l,t,a,x,mat}$  is the number of observed deaths in the sample due to maternal causes,  $E[D_{l,t,a,x}]$  is the GBD estimate of all-cause mortality in the location, year, age, and sex, and  $E[D_{l,t,a,x,hiv\_shock\_free}]$  is the GBD estimate of HIV- and shock-free mortality in the location, year, age, and sex.

### Step 11.3 HIV/AIDS correction of sibling history, census, and survey data

As described in our analysis from GBD 2013, many studies have failed to find increased mortality in HIV-positive pregnant mothers, but those who have advanced HIV are known to have increased baseline mortality. Prior to GBD 2013, we did not distinguish between deaths in HIV+ women that were caused by pregnancy and those for which the pregnancy was incidental to their death. In order to more explicitly quantify the contribution of pregnancy to death in HIV+ women, and therefore more accurately estimate the maternal death count, we completed two additional analyses for GBD 2013. First, we determined the population attributable fraction (PAF) of HIV/AIDS to pregnancy-related death. Second, we determined the proportion of pregnancy-related deaths in HIV-positive persons that are aggravated by pregnancy and are therefore by definition maternal deaths.

$$PAF = \frac{P(RR - 1)}{1 + P(RR - 1)}$$

Where PAF is the population attributable fraction, p denotes the prevalence of HIV in pregnancy, and RR is relative risk of mortality in HIV+ vs HIV- pregnant females.

To recap our analysis for GBD 2013, we used the paper published by Calvert and Ronsmans to identify sources<sup>13</sup> that could inform Step 1 of our HIV-correction analysis. We independently reviewed each of the component studies in Calvert and Ronsmans' review and extracted data directly, not from the systematic review paper. We identified only one additional study that was not used in Calvert and Ronsmans' analysis. We have, however, not used all the studies included in that review. Specific details are as follows: 1) Figueroa-Damian, et al. was excluded for not including any postpartum deaths at all. 2) In the case of Ryder, et al. and Zvandasara, et al. we excluded those deaths > 12 months after delivery.

3) We excluded the results from Chilongozi, et al. from the site that did not include any HIV-negative patients. 4) Leroy, et al. was not in the bibliography. We could not locate it for review so it was excluded. 5) Kourtis, et al. was extracted with adjustment of the denominator based on the average number of hospitalisations per delivery in each group. 6) Ticconi, et al. was excluded for being both non-representative and including subgroup data from mothers with malaria infection. A total of 21 sources were included in our analysis of the increased mortality risk of HIV+ versus HIV- women in pregnancy.<sup>10</sup> We performed DerSimonian-Laird random effects meta-analysis to derive a pooled estimate of RR of death during pregnancy given HIV positivity.<sup>14</sup> The pooled effect size was 6.40 (95% UI 3.98–10.29), which was then used to calculate an HIV PAF for each country, age group, and year. In order to determine the proportion of those HIV-related deaths that were attributable to maternal causes, we performed a second systematic literature review. This time we sought evidence for the excess mortality risk of pregnancy in those women who are already HIV-positive. Most studies have failed to find such an effect, but most also did not stratify their study population by stage of HIV or ART status. Only two studies did this stratification, with a pooled effect size of 1.13 (95% UI 0.73–1.77).

An updated literature review to inform the relative risk of mortality in pregnancy in HIV-positive versus HIV-negative women had 14 hits, but no usable sources. We completed this search on August 30, 2016, using the following two search strings:

```
( HIV[Title/Abstract] OR "Acquired Immunodeficiency Syndrome"[Title/Abstract] OR AIDS[Title/Abstract] )
AND ( "pregnant"[Title/Abstract] OR "pregnancy"[Title/Abstract] OR "postpartum"[Title/Abstract] OR "post
partum"[Title/Abstract] ) AND ( "mortality"[Title/Abstract] OR "death"[Title/Abstract] ) NOT "case report"
AND "humans"[MeSH Terms] AND ( 2011/07/06[PDat] : 2016/12/31[PDat] )
```

Prevalence of HIV in pregnant women was calculated using UNAIDS' Spectrum model. Spectrum is a compartmental HIV progression model used to generate age-specific incidence, prevalence, and death rates from pre-calculated incidence curves and assumptions about intervention scale-up and local variation in epidemiology. For each location, we used UNAIDS' age-specific ratios of fertility in women living with HIV to fertility in women not living with HIV. In most locations, this ratio is assumed to be greater than one in women aged 15–24 and less than one and decreasing as age increases beyond 24. Since Spectrum assumes fertile ages of 15–49, we used the ratio of HIV prevalence in pregnant women to HIV prevalence in the general population at either end of that range to extend estimates to age bands 10–14 and 50–54.

Unlike GBD 2013, when we applied the PAF correction to the envelope of maternal deaths predicted by CODEm, we instead applied country-year-age-group-specific PAF to maternal mortality input data prior to modelling in CODEm. This ensured that both the numerator and denominator of all CF data were internally consistent in their exclusion of background HIV/AIDS mortality. The cause fractions for maternal deaths in sibling history, survey, and census data were therefore adjusted as follows:

$$CF_{l,t,a,x,mat_{adj}} = CF_{l,t,a,x,mat} * (1 - Prop_{hiv_{l,t,a,x}}) Prop_{hiv}$$

$$CF_{l,t,a,x} = PAF_{l,t,a,x,hivpos} * (1 - rr_{mat})$$

$$CF_{l,t,a,x,mat_{hiv}} = CF_{l,t,a,x,mat} * Prop_{maternalhiv_{l,t,a,x}}$$

$$Prop_{maternalhiv_{l,t,a,x}} = PAF_{l,t,a,x,hivpos} * rr_{mat}$$

*Where:*

$rr_{mat} = .13/1.13$  = The proportion of HIV/AIDS deaths during pregnancy that were exacerbated by the pregnancy.

$PAF_{l,t,a,x,hivpos}$  = The population-attributable fraction (PAF) that describes the percentage of all maternal deaths that were HIV-related for the location (l), year (t), age (a), and sex (x=Female))

$CF_{l,t,a,x,mat}$  = The proportion of deaths due to all maternal causes before HIV/AIDS correction for the location, year, age, and sex.

$Prop_{hiv_{l,t,a,x}}$  = The proportion of deaths in pregnancy for the location, year, age, and sex that are estimated to be incidental deaths due to HIV/AIDS, and therefore not a maternal cause of death.

$Prop_{maternalhiv_{l,t,a,x}}$  = The proportion of deaths in pregnancy for the location, year, age, and sex that are estimated to be HIV-positive and maternal deaths which are aggravated by HIV/AIDS.

$CF_{l,t,a,x,mat_{adj}}$  = The proportion of deaths due to maternal causes after the adjustment for the location, year, age, and sex.

$CF_{l,t,a,x,mat_{hiv}}$  = The proportion of deaths due to maternal deaths aggravated by HIV/AIDS after the adjustment for the location, year, age, and sex.

#### Step 11.4 HIV/AIDS correction of other maternal mortality data

Although there are a specific subset of codes in ICD10 that correspond to HIV/AIDS deaths aggravated by pregnancy, these codes are sparsely used and unreliable. We therefore adapted the method above to also correct VR and VA sources for the systematic exclusion of HIV-related maternal deaths. This correction was calculated in the same manner, using the same input data as above, with the only difference that HIV correction of VR and VA sources resulted in a net increase in maternal CF. Maternal deaths aggravated by HIV/AIDS are calculated as the following:

$$CF_{l,t,a,x,mat_{hivvr}} = CF_{l,t,a,x,matvr} * Prop_{maternal_{hivl,t,a,x}}$$
$$Prop_{maternal_{hivl,t,a,x}} = \frac{PAF_{l,t,a,x,hivpos} * rr_{mat}}{1 - PAF_{l,t,a,x,hivpos} * rr_{mat}}$$

Where all symbols are the same as described above.

#### 2.14 Step 12. Noise reduction

To deal with problems of zero counts in vital registration, verbal autopsy, cancer registries, or sibling histories for a given age group in a given year, we use a Bayesian noise-reduction algorithm. For this algorithm, we assume a normal prior and a normal data likelihood. We estimate the normal prior for a given country-series of data by estimating a negative binomial for the fraction of deaths in each age group due to each respective cause with dummy variables for age and year. With two notable exceptions (detailed below), these regressions are country-specific, so borrowing strength over age is only within a data type in a country. The variance of the prior,  $\tau^2$ , is estimated from the negative binomial regression, taking into account the variance-covariance matrix of the regression coefficients. For the data variance, we use the Wilson approximation which provides an estimate of  $\sigma^2$  even in cases with a zero count of cause-specific deaths. The posterior estimate for each data point is:

$$Mean = \left( \frac{\tau^2}{\tau^2 + \sigma^2} X + \frac{\sigma^2}{\tau^2 + \sigma^2} \mu \right)$$
$$Variance = \left( \frac{\tau^2 \sigma^2}{\tau^2 + \sigma^2} \right)$$

Where  $X$  is the mean of the data and  $\mu$  is the mean of the prior. This approach to noise reduction avoids the problem that zero counts in an  $\ln$  rates model or a logit cause fraction model will be dropped from the regression and lead to upward bias in the estimates. This is particularly important in two settings: high-income countries with small numbers of cause-specific deaths, and in the analysis of sibling history data where for any given age group in any given year the number of deaths reported in the survey that are pregnancy-related or the number of deaths from all causes in that age group may be small.

Regarding the exceptions to the regression, the first is that country-years with populations under 1 million are pooled with the region data in order to prevent overdispersion and provide a stronger signal. Additionally, verbal autopsy data diverge from the above description in two ways. First, all data for a



given super-region are pooled together and a study dummy variable is added, allowing for different studies and surveillance sites to borrow strength from one another within a super-region. Second, unless the data are part of a time series (eg, Matlab HDSS), there is no year component to the regression.

### 2.15 Step 13. COD database and outlier identification

Death rates for different causes of death generally have a stable age pattern. In large populations, these patterns will not change very rapidly over time. We can assume a relatively stable pattern in death rates for all causes except for some epidemic diseases and specific types of injuries. Rare causes in large populations and prevalent causes in small populations usually have stochastic patterns. To correct for these stochastic patterns we implement a noise-reduction process, explained in Step 12.

In vital registration data, we infrequently find one or more data points for specific geography/age/sex/years that lie very far from the stable pattern of death rates. In these situations, the model will usually ignore the data point(s). If the model fails to ignore these data, dramatic jumps or drops can occur in the death rates. When there is no logical explanation for variation in the death rates to this degree, we outlier the data point(s). The selection of data points to outlier occurs after data have been prepped for modelling, as well as during preliminary reviews of the models.

In non-vital-registration sources, data-collection methods and data quality can vary widely from source to source. Where data points in each age-sex-geography-year are very sparse, extreme data points can have a bad effect on regional estimation. In these situations we investigate the study's methods and outlier lower-quality data points.

Identifying outliers in the cause of death data occurs prior to finalisation of models for each cause. We do not automate the selection of outliers, but investigate the source of the offending data as well as reviewing other data sources for the same cause, geography, and year. Ultimately, outliers are identified based on the judgement of the modeller and senior faculty and are reversible to allow for decisions to be revisited in the future.

## 2.16 Causes of death data star rating calculation

GBD estimates are most accurate when computed with a full time series of complete vital registration with a low percentage of garbage codes. For GBD 2016, we developed a simple star-rating system from 0 to 5 to give a picture of the quality of data available in a given country over the full time series used in GBD estimates. Countries improve in the star rating as they increase availability, completeness, and detail of their mortality data and reduce the percentage of deaths coded to ill-defined garbage codes or highly aggregated causes.

To assign stars, we measure the proportion of deaths registered to a well-defined cause from 1980 to 2016. We call this proportion “percent well-certified”. We measure this proportion for each location-year of vital registration and each verbal autopsy study separately, and then combine the yearly measurements into a percent well-certified for the full time series.

For each year of vital registration, percent well-certified is:

$$pct_{wellcertified} = completeness * (1 - pct_{majgarbage})$$

Where:

$$completeness = \frac{registered\ deaths}{GBD\ mortality\ envelope}$$

$$pct_{majgarbage} = \frac{deaths\ coded\ to\ level\ 1\ or\ 2\ garbage\ or\ highly\ aggregated\ cause}{registered\ deaths}$$

Simplifying this equation, one can see that in this case “percent well-certified” is simply the number of deaths that are registered to a well-defined cause (those codes which are not Level 1 or 2 garbage or highly aggregated) divided by the GBD mortality envelope.

ICD10 and ICD9 codes assigned to Level 1 or 2 garbage can be found in Appendix Table 3.

For each verbal autopsy data source, percent well-certified is:

$$pct_{wellcertified} = VerbalAutopsyAdjustment * (1 - pct_{majgarbage})$$

Where:

$$VerbalAutopsyAdjustment = SubAdj * RegAdj * AgeSexCoverage$$

And:

SubAdj:

10% for subnationally representative studies, 100% for nationally representative studies. This adjustment, while arbitrary in its specific value, reflects the bias that can be associated with studies that only cover a potentially non-representative sample of a country’s population.

RegAdj:

64% for all verbal autopsy data sources. This accounts for the inaccuracy of verbal autopsy in assigning cause of death compared to medically verified vital registration.

The specific multiplier 0.64 is based on the chance-corrected concordance of Physician Certified Verbal Autopsy (PCVA) versus medical certification by the Population Health Metrics Research Consortium.<sup>15</sup>

**Age-Sex Coverage:**

The number of deaths estimated in the GBD mortality envelope for the ages and sexes in the study for the country and year divided by the number of deaths estimated in the GBD mortality envelope for the country and year. Studies that only cover children under 5 or maternal mortality, for example, will be highly discounted by this multiplier.

In the case of verbal autopsy, all garbage codes are considered ill-defined, as redistribution for verbal autopsy is highly imprecise. Causes such as “Injuries” or “Cancer” will also be included in major garbage percentage, as this percentage includes use of highly aggregated causes.

Once percent well-certified is calculated for each location-year of vital registration and each verbal autopsy study-year, we then combine these into one measurement for each five-year time interval and the full time series 1980–2016. For each five-year time interval, we take the maximum percent well-certified. Then for 1980–2016, we take the average of the maximum percentages well-certified for the seven five-year time intervals, including any five-year time interval where no data were available as a zero.

Once these values are calculated, we assign stars as follows:

5 stars: 85%–100% well-certified

4 stars: 65%–84% well-certified

3 stars: 35%–64% well-certified

2 stars: 10%–34% well-certified

1 star: >0%–9% well-certified

0 stars: No vital registration or verbal autopsy data available from 1980–2016

While stars are calculated for each five-year time interval as well as the full time series from 1980 to 2016, stars in the main text are presented for the full time series only.

Appendix Table 17 shows the percent well-certified, stars, data source, and underlying values for percent well certified used for each country and time interval.

## Section 3: Causes of death modeling methods

### 3.1 CODEm

#### 3.1.1 Overview of method

Cause of death ensemble modelling (CODEm) is the framework used to model most cause-specific death rates in the GBD.<sup>16</sup> It relies on four key components. First, all available data are identified and gathered to be used in the modelling process. Though the data may vary in quality, they all contain some signal of the true epidemiological process. Second, a diverse set of plausible models are developed to capture well-documented associations in the estimates. Using a wide variety of individual models to create an ensemble predictive model has been shown to outperform techniques using only a single model both in cause of death estimation<sup>16</sup> and in more general prediction applications.<sup>17,18</sup> Third, the out-of-sample predictive validity is assessed for all individual models, which are then ranked for use in the ensemble modelling stage. Finally, differently weighted combinations of individual models are evaluated to select the ensemble model with the highest out-of-sample predictive validity.

For some causes (see, for example, lower respiratory infections), there is evidence that the relationship between covariates and death rates might differ between children and adults. Separate models are therefore run for different age ranges when applicable. Additionally, separate models are developed for countries with extensive, complete, and representative vital registration (VR) for every cause to ensure that uncertainty can better reflect the more complete data in these locations.

#### 3.1.2 Model pool development

Because many factors may covary with any given cause of death, a range of plausible statistical models are developed for each cause. In the CODEm framework, four families of statistical models are used: linear mixed effects regression (LMER) models of the natural log of the cause-specific death rate, LMER models of the logit of the cause fraction, spatiotemporal Gaussian process regression (ST-GPR) models of the natural logarithm of the cause-specific death rate, and ST-GPR models of the logit of the cause fraction (see the 2x2 table in Foreman et al).<sup>16</sup> For each family of models, all plausible relationships between covariates and the response variable are identified. Because all possible combinations of selected covariates are considered for each family of models, multicollinearity between covariates may produce implausible signs on coefficients or unstable coefficients. Each combination is therefore tested for statistical significance (covariate coefficients must have a coefficient with p-value < 0.05) and plausibility (the coefficients must have the directions expected based on the literature). Only covariate combinations meeting these criteria are retained. This selection process is run for both cause fractions and death rates, then ST-GPR and LMER-only models are created for each set of covariates. For a detailed explanation of the covariate selection algorithm, see Foreman et al 2012.<sup>16</sup>

#### 3.1.3 Testing model pool on 15% sample

The performance of all models (individual and ensemble) is evaluated using out-of-sample predictive validity tests. Thirty percent of the data are excluded from the initial model fits. These individual model fits are evaluated and ranked using half of the excluded data (15% of the total), then used to construct the ensembles based on their performance. Data are held out from the analysis based on

the cause-specific missingness patterns for ages and years across locations. Out-of-sample predictive validity testing is repeated 20 times for each model, which has been shown to produce stable results.<sup>16</sup> These performance tests include the RMSE for the log of the cause-specific death rate, the direction of the predicted versus actual trend in the data, and the coverage of the predicted 95% UI.

#### 3.1.4 Ensemble development and testing

The component models are weighted based on their predictive validity rank in order to determine their contribution to the ensemble estimate. The relative weights are determined both by the model ranks and by a parameter  $\psi$ , whose value determines how quickly the weights taper off as rank decreases. The distribution of  $\psi$  is described in more detail in Foreman et al 2012.<sup>16</sup> A set of ensemble models is then created using the weights constructed from the combinations of ranks and  $\psi$  values. These ensembles are tested using the predictive validity metrics described in Section 3.1.3 on the remaining 15% of the data, and the ensemble with the best performance in out-of-sample trend and RMSE is chosen as the final model.

#### 3.1.5 Final estimation

Once a weighting scheme has been chosen, 1,000 draws are created for the final ensemble, with the number of draws contributed by each model proportional to its weight. The mean of the draws is used as the final estimate for the CODEm process, and a 95% uncertainty interval (UI) is created from the 0.025 and 0.975 quantiles of the draws. The validity of the UI can be checked via its coverage of the out-of-sample data; ideally, the 95% UI would capture 95% of these data. Higher coverage suggests that the UIs are too large, and lower coverage suggests overfitting.

#### 3.1.6 Selection of causes for which CODEm is used

CODEm is used to model 205 causes, described in detail below. However, it is unsuitable for use in modelling certain causes, including those with very low death counts, those where cause-specific death record availability is inadequate, or those for which there are marked biases or variability for cause of death certification over time that cannot be fully accounted for with the current garbage code redistribution algorithms. Criteria for causes where CODEm is not used are discussed in further detail in Section 3.2.

#### 3.1.7 Model-specific covariates

A table of CODEm covariates used, level of the covariate, and expected direction of the covariate by cause, sex, age, and location can be found in Appendix Table 6.

#### 3.1.8 Fit statistics for CODEm models

A table of CODEm predictive validity results by cause, sex, and, and location can be found in Appendix Table 7.

## 3.2 Causes modelled outside of CODEm

### 3.2.1 Overview

A number of causes required alternative modelling strategies to those used for CODEm, as they were not compatible with CODEm estimation infrastructure and processes. Such unsuitability included having very low death counts; inadequate availability of cause-specific death records; and marked biases or variability for cause of death certification over time which could not be fully accounted for with current garbage code redistribution algorithms. The inclusion of these causes in CODEm often renders its out-of-sample predictive validity testing, a key advantage of using CODEm for cause of death estimation, unstable, or CODEm simply fails to generate plausible mortality rates in the absence of enough VR or VA data. Due to increased data availability and redistribution algorithm refinements, we were able to incorporate several new causes, which were modelled separately for GBD 2013, into CODEm for this iteration of the GBD study; with each annual update of GBD, we aim to add more causes within the CODEm estimation space. For GBD 2016, we used alternative modelling approaches for these causes, including negative binomial models, natural history models, sub-cause proportion models, and prevalence-based models.

### 3.2.2 Negative binomial models

For ten rare causes of death, there were too few observed deaths in the cause of death database to produce stable estimates. For these causes, we ran negative binomial regression models with either a constant or constant multiplied by the mean assumption for the dispersion parameter, using reverse step-wise model building. We selected between the two model dispersion assumptions on the basis of best fit to the data, using the same method as GBD 2013. For GBD 2015 we also tested zero-inflated Poisson models for these rare causes of death, but rejected them after finding that they did not substantially affect the mean predictions but produced unrealistically large UIs. Descriptions of the modelling process for each of these causes follow.

### 3.2.3 DisMod-MR 2.1

Until GBD 2010, non-fatal estimates were based on a single data source on prevalence, incidence, remission, or a mortality risk selected by the researcher as most relevant to a particular location and time. For GBD 2010, we set a more ambitious goal: to evaluate all available information on a disease that passes a minimum quality standard. That required a different analytical tool that would be able to pool disparate information presented in varying age groupings and from data sources using different methods. The DisMod-MR 1.0 tool used in GBD 2010 evaluated and pooled all available data, adjusted data for systematic bias associated with methods that varied from the reference and produced estimates by world regions with uncertainty intervals. For GBD 2013, the improved DisMod-MR 2.0 had increased computational speed, allowing computations that were consistent between all disease parameters at the country rather than region level. The hundred-fold increase in speed of DisMod-MR 2.0 was partly due to a more efficient rewrite of the code in C++ but also by changing to a model specification using log rates rather than a negative binomial model used in DisMod-MR 1.0. In cross-validation tests, the log rates specification worked as well or better than the negative binomial specification.<sup>19</sup> For GBD 2015, the computational engine (DisMod-MR 2.1) remained substantively unchanged but we re-wrote the “wrapper” code that organised the flow of data and settings at each level of the analytical cascade. The sequence of estimation occurred at five levels: global, super-region,

region, country, and, where applicable, subnational locations (see flow diagram of DisMod-MR 2.1 cascade, below). The super-region priors were generated at the global level with mixed-effects, non-linear regression using all available data; the super-region fit, in turn, informed the region fit, and so on down the cascade. The wrapper gave analysts the choice to branch the cascade in terms of time and sex at different levels depending on data density. The default used in most models was to branch by sex after the global fit but to retain all years of data until the lowest level in the cascade. For GBD 2015, we generated fits for the years 1990, 1995, 2000, 2005, 2010, and 2015.

In updating the “wrapper,” we consolidated the code base into a single language, Python, to make the code more transparent and efficient and to better deal with subnational estimation. The computational engine is limited to three levels of random effects; we differentiated estimates at the super-region, region, and country levels. In GBD 2013, the subnational units of China, Mexico, and the UK were treated as “countries” such that a random effect was estimated for every location with contributing data. However, the lack of a hierarchy between country and subnational units meant that the fit to country data contributed as much to the estimation of a subnational unit as the fits for all other countries in the region. We found inconsistency between the country fit and the aggregation of subnational estimates when the country’s epidemiology varied from the average of the region. Adding an additional level of random effects required a prohibitively comprehensive rewrite of the underlying DisMod-MR engine. Instead, we added a fifth layer to the cascade, with subnational estimation informed by the country fit and country covariates, plus an adjustment based on the average of the residuals between the subnational unit’s available data and its prior. This mimicked the impact of a random effect on estimates between subnationals.

For GBD 2015 we improved how country covariates differentiate non-fatal estimates for diseases with sparse data. The coefficients for country covariates were re-estimated at each level of the cascade. For a given location, country coefficients were calculated using both data and prior information available for that location. In the absence of data, the coefficient of its parent location was used, in order to utilise the predictive power of our covariates in data sparse situations.

For GBD 2016, the DisMod-MR 2.1 tool was used. Updates included estimation of new age groups through the GBD 2016 terminal age group of 95+, in addition to the new locations added for the GBD 2016 cycle. Please see Appendix Figure 3 for details of the GBD 2016 DisMod-MR 2.1 analytical cascade.

### DisMod-MR 2.1 likelihood estimation

Analysts have the choice of using a Gaussian, log-Gaussian, Laplace, or log-Laplace likelihood function in DisMod-MR 2.1. The default log-Gaussian equation for the data likelihood is:

$$-\log[p(y_j|\Phi)] = \log(\sqrt{2\pi}) + \log(\delta_j + s_j) + \frac{1}{2} \left( \frac{\log(a_j + \eta_j) - \log(m_j + \eta_j)}{\delta_j + s_j} \right)^2$$

where,  $y_j$  is a “measurement value” (ie, data point);  $\Phi$  denotes all model random variables;  $\eta_j$  is the offset value, eta, for a particular “integrand” (prevalence, incidence, remission, excess mortality rate, with-condition mortality rate, cause-specific mortality rate, relative risk, or standardised mortality ratio), and  $a_j$  is the adjusted measurement for data point  $j$ , defined by:

$$a_j = e^{(-u_j - c_j)} y_j$$

where  $u_j$  is the total “area effect” (ie, the sum of the random effects at three levels of the cascade: super-region, region, and country) and  $c_j$  is the total covariate effect (ie, the mean combined fixed effects for sex, study-level, and country-level covariates), defined by:

$$c_j = \sum_{k=0}^{K[I(j)]-1} \beta_{I(j),k} \hat{X}_{k,j}$$

with standard deviation

$$s_j = \sum_{l=0}^{L[I(j)]-1} \zeta_{I(j),l} \hat{Z}_{k,j}$$

where  $k$  denotes the mean value of each data point in relation to a covariate (also called x-covariate);  $l(j)$  denotes a data point for a particular integrand,  $j$ ;  $\beta_{I(j),k}$  is the multiplier of the  $k^{\text{th}}$  x-covariate for the  $i^{\text{th}}$  integrand;  $\hat{X}_{k,j}$  is the covariate value corresponding to the data point  $j$  for covariate  $k$ ;  $l$  denotes the standard deviation of each data point in relation to a covariate (also called z-covariate);  $\zeta_{I(j),k}$  is the multiplier of the  $l^{\text{th}}$  z-covariate for the  $i^{\text{th}}$  integrand; and  $\delta_j$  is the standard deviation for adjusted measurement  $j$ , defined by:

$$\delta_j = \log[y_j + e^{(-u_j - c_j)} \eta_j + c_j] - \log[y_j + e^{(-u_j - c_j)} \eta_j]$$

Where  $m_j$  denotes the model for the  $j^{\text{th}}$  measurement, not counting effects or measurement noise and defined by:

$$m_j = \frac{1}{B(j) - A(j)} \int_{A(j)}^{B(j)} I_j(a) da$$

where  $A(j)$  is the lower bound of the age range for a data point;  $B(j)$  is the upper bound of the age range for a data point; and  $I(j)$  denotes the function of age corresponding to the integrand for data point  $j$ .

The source code for DisMod-MR 2.1 as well as the wrapper code are available at <http://ihmeuw.org/dismod-ode>.



### 3.2.4 Natural history models

For some causes where cause of death data may be systematically biased due to either misclassification or because the disease exists in focal communities without vital registration or verbal autopsy studies, we have developed natural history models. In natural history models incidence and case-fatality rates are modelled separately and then combined to produce estimates of cause-specific mortality.

### 3.2.5 Prevalence-based models

The modelling strategies for Alzheimer's and other dementias, Parkinson's disease, and atrial fibrillation and flutter are distinct from those used for other causes modelled as natural history models. These models use prevalence estimates and excess mortality rates (EMR) generated through DisMod-MR 2.1, rather than incidence and case-fatality rates.

### 3.2.6 Sub-cause proportion models

For certain sub-causes for which accurate diagnoses are known to be very difficult, we first modelled the parent cause in the GBD hierarchy with CODEm and then allocated deaths to specific causes using proportions of the parent cause for each age-sex-location-year for each sub-cause. For these causes, we identified no significant predictors in negative binomial regressions. This approach was taken because the available data on these specific causes may come from sources other than VR, such as end-stage renal disease registries, or come from too few places to model the death rates directly. Details for each cluster of causes analysed in this way are below.

## Section 4: Central computation

### 4.1. Correction for miscoding of Alzheimer's and other dementias and Parkinson's disease

#### 4.1.1 Objective

We estimated Alzheimer's disease and other dementias, Parkinson's disease, and atrial fibrillation and flutter on the basis of longitudinal prevalence and excess-mortality data in order to help account for changing patterns in death certification and corresponding implausible time trends in many vital registration sources. This method was first implemented for Alzheimer's disease and other dementias in GBD 2013. We added atrial fibrillation and flutter and Parkinson's disease to the causes modelled using this strategy in GBD 2015 and GBD 2016, respectively. All of these causes were processed in CoDCorrect in a manner that was agnostic to the likely targets of misclassification, which inappropriately led to changes in mortality estimates for causes unrelated to these three in GBD 2015. For GBD 2016, we have improved this process by completing a literature review to identify the causes of death most closely associated with Parkinson's and Alzheimer's diseases<sup>20-23</sup> and limiting the CoDCorrect adjustments to only include those causes. We summed CODEm results for Parkinson's, Alzheimer's, lower respiratory infections, protein-energy malnutrition, other nutritional deficiencies, cerebrovascular disease, interstitial nephritis and urinary tract infections, decubitus ulcer, and pulmonary aspiration and foreign body in airway to generate a total envelope for all these conditions. This envelope is used as a parent cause for all calculations outlined below. Atrial fibrillation and flutter did not require a similar process as its scaling in CoDCorrect is already restricted to be within the cardiovascular disease section of the GBD cause list.

#### 4.1.2 Algorithm and levels

The core algorithm closely resembles the CodCorrect algorithm, and can be written as follows:

$$oCD_{lyasjd} = CustomD_{lyasjd} \left( \frac{CODEmD_{lyasjd}}{\sum_{j=1}^{j=k} CustomD_{lyasjd}} \right)$$

Where  $oCD_{lyasjd}$  is the corrected number of deaths for a location  $l$ , year  $y$ , age  $a$ , sex  $s$ , cause  $j$ , and draw  $d$ .  $CodemD_{lyasjd}$  is the parent cause deaths for a location  $l$ , year  $y$ , age  $a$ , sex  $s$ , cause  $j$ , and draw  $d$ , using data from CODEm for all causes. For every cause in this correction we use the same parent cause which is equal to the sum of the individual causes using data from CODEm.  $CustomD_{lyasjd}$  is the uncorrected number of deaths estimated from a cause-specific model for a location  $l$ , year  $y$ , age  $a$ , sex  $s$ , cause  $j$ , and draw  $d$ , using data from DisMod-MR 2.1 for Alzheimer's and Parkinson's and data from CODEm for all other causes.

This correction process only works on one level. It rescales the custom cause-specific deaths to match the correction envelope (which is used for  $CodemD_{lyasjd}$  in the above equation). The custom cause-specific deaths (which are used for  $CustomD_{lyasjd}$  in the above equation) are either DisMod-MR 2.1 results (for Alzheimer's and Parkinson's) or CODEm results (for all other causes). Because there is only one level, this process occurs only once for each cause.

## 4.2 Imported cases

Imported cases are fatalities that occur in a geographic area where a particular cause of death is known to be eradicated in a specific time period or where infection cannot occur. We apply space-time restrictions to these causes in the modeling strategy for that location and time period. However, in some rare cases, there are deaths from these causes outside of restricted locations and time periods. These deaths are referred to as Imported Cases.

Illustrating this concept, Chagas Disease is transmitted by insect vectors that only exist in the Americas. For this reason, Chagas Disease is restricted in the models for countries such as Russia. However, it is possible that someone traveling in Latin America could contract Chagas Disease and then die after returning home to Russia. Imported cases accounts for these kinds of deaths.

To calculate these Imported cases, we find all cases from the Vital Registrations of data-rich countries for any cause of death that is otherwise geographically or temporally restricted. We then create a beta distribution from that data point, using the sample size of the Vital Registration for that data point, and upload these draws as a custom Cause of Death model. This model is then used as an input to CoDCorrect.

## 4.3 CodCorrect

### 4.3.1 Objective of CodCorrect

As mentioned in the main text, the Causes of Death models are cause-specific. As such, there is no guarantee that the sum of these models will equal the results of the all-cause mortality estimates or that model results of child causes add up to the parent model results. The CoDCorrect process is used to make the Causes of Death and all-cause mortality estimates internally consistent using a very simple algorithm.

### 4.3.2 Algorithm and levels

The core algorithm remains the same as it did in GBD 2013. The equation can be written as follows:

$$CD_{lyasjd} = D_{lyasjd} \left( \frac{PD_{lyasjd}}{\sum_{j=1}^{j=k} D_{lyasjd}} \right)$$

Where  $CD_{lyasjd}$  is the corrected number of deaths for a location  $l$ , year  $y$ , age  $a$ , sex  $s$ , cause  $j$ , and draw  $d$ .  $PD_{lyasjd}$  is the parent cause deaths for a location  $l$ , year  $y$ , age  $a$ , sex  $s$ , cause  $j$ , and draw  $d$ .  $D_{lyasjd}$  is the uncorrected number of deaths estimated from a cause-specific model for a location  $l$ , year  $y$ , age  $a$ , sex  $s$ , cause  $j$ , and draw  $d$ .

The CoDCorrect process starts by rescaling the Level 1 causes to match the all-cause mortality estimates (which is used for  $PD_{lyasjd}$  in the above equation). Level 2 causes are then rescaled to their corrected parent causes. This continues until all levels of the hierarchy have been rescaled. Causes and their levels within the CoDCorrect hierarchy can be found in Appendix Table 10.

Unlike in GBD 2013, HIV is not included in the CoDCorrect process for GBD 2016. To account for this change, Level 1 CoDCorrect causes are rescaled to HIV-deleted mortality estimates which are produced as part of the mortality and HIV estimation process. Results from the GBD version of Spectrum are

added to the post-CoDCorrect death estimates, along with fatal discontinuities and imported cases, to generate the full set of death estimates.

#### 4.3.3 Diagnostic results of CodCorrect by cause and location

For more detail on diagnostic results of CodCorrect by cause see Appendix Table 11.

#### 4.4 Years of life lost (YLLs) calculation

Years of life lost due to premature mortality (YLLs) were computed for 693 locations and 36 years. First, we used the lowest observed age-specific mortality rates by location and sex across all estimation years from locations with total populations greater than 5 million in 2016 to establish a theoretical minimum risk reference life table. The values can be found in Appendix Table 18.

The YLL is a metric that is computed by multiplying the number of estimated deaths by the standard life expectancy at age of death. The metric therefore highlights premature deaths by applying a larger weight to deaths that occur at younger age groups. We propagated uncertainty from CoDCorrected deaths for all demographics. The core equation can be written as follows:

$$YLL = \sum_{c=1, a=0, s=1}^{\infty} d_{cas} e_a$$

##### 4.4.1 GBD world population age standard

Age-standardised rates in GBD are estimated using the GBD world population age standard, which is calculated using methods detailed in Ahmad et al 2001.<sup>24</sup> Briefly, we used the age-specific proportional distributions of all national locations from the World Population Prospects 2012 revision<sup>25</sup> for all years from 2010 to 2035 and generated a standard population structure by taking the non-weighted mean across all the aforementioned country-years. For consistency and comparability across recent iterations of GBD, we used the same standard population structure as used in GBD 2013 and GBD 2015. For values used for the age standard see Appendix Table 19.

## 4.5 Socio-demographic Index (SDI) analysis

### 4.5.1 Development of revised SDI indicator

The Socio-demographic Index (SDI) is a composite indicator of development status constructed for GBD 2015 whose components are strongly correlated with health outcomes. It is the geometric mean of 0 to 1 indices of total fertility rate, mean education for those aged 15 and older, and lag distributed income per capita.

SDI was calculated using the Human Development Index (HDI) methodology, wherein an index value was determined for each of the covariate inputs (log LDI, mean educational attainment over age 15, and TFR). For GBD 2015 these indices were computed on the basis of a relative scale, in which the upper and lower bounds were established by the maximum and minimum observed values, respectively, for each input over the entire estimation period of 1980–2015.

Prompted by the observations that the scales (and by extension SDI) were sensitive to the addition of new subnational locations as GBD becomes more granular and to the length of the time period over which SDI is computed, for GBD 2016 we implemented fixed scales in determining individual indices. Thus, an index score of 0 now represents the minimum level of each covariate input past which selected health outcomes can get no worse. An index score of 1 represents the maximum level of each covariate input past which selected health outcomes cease to improve. As a composite, a location with an SDI of 0 would have a theoretical minimum level of development relevant to these health outcomes, while a location with an SDI of 1 would have a theoretical maximum level of development relevant to these health outcomes.

We selected the minima and maxima of the scales by examining the relationships each of the inputs had with life expectancy at birth and under-5 mortality and identifying points of limiting returns at both high and low values, if they occurred prior to theoretical limits (eg, a TFR of 0). The final scales are summarised in the table below.

| <b>Input</b>                                      | <b>Lower bound</b>                  | <b>Upper bound</b>         |
|---------------------------------------------------|-------------------------------------|----------------------------|
| TFR                                               | 1.5 <sup>a</sup>                    | 8                          |
| LDI per capita                                    | 250 USD (5.52 log USD) <sup>b</sup> | 60,000 USD (11.00 log USD) |
| Mean educational attainment for ages 15 and older | 0 years                             | 17 years                   |

<sup>a</sup> The low point of limiting returns for TFR was identified at 1 during GBD 2015; however, incorporating feedback with regard to accounting for a pattern of TFR rebound in highly developed countries, we instead set the lower limit of TFR at 1.5.

<sup>b</sup> The minimum for the LDI scale was originally set at the theoretical limit of 0 USD, as we did not observe an asymptotic relationship between  $\log(\text{LDI})$  and  $E_0$  or  $5q_0$  at lower values of  $\log(\text{LDI})$ . Empirically, however, we also did not observe an LDI below 350 USD (5.86 log USD) for the estimation period 1970–2016. In log-space, this meant that approximately half of our scale was not being utilised, compressing the observed variation in LDI and diminishing its meaningful contribution to SDI. Accordingly, we set the lower limit on LDI to 250 USD (5.52 log USD) to ensure we were fully utilising the range of the scale to capture its variation across space and time, as is the case with the other two inputs.

Using the limits on the scales described above, we computed the index scores underlying SDI analogously to GBD 2015 as follows:

$$I_{cly} = \frac{(C_{ly} - C_{low})}{(C_{high} - C_{low})}$$

Where  $I_{cly}$  – the index for covariate  $C$ , location  $l$ , and year  $y$  – is equal to the difference between the value of that covariate in that location-year and the lower bound of the covariate divided by the difference between the upper and lower bounds for that covariate. If the values of input covariates fell outside the upper or lower bounds (eg, LDI per capita greater than 60,000 USD), they were mapped to the respective upper or lower bounds. We also note that the index value for TFR was computed as  $1 - I_{TFRly}$ , as lower TFRs correspond to higher levels of development, and thus higher index scores. For GBD 2016 we expanded the computation of SDI to 755 national and subnational locations spanning the time period 1970–2016.

The composite Socio-demographic Index is the geometric mean of these three indices for a given location-year. The cutoff values used to determine quintiles for analysis were then computed using country-level estimates of SDI for the year 2016, excluding countries with populations less than 1 million.

#### Example calculation

Below we present the calculation of SDI for Mexico in the year 2010:

$$TFR = 2.43; \text{ Mean educ yrs pc} = 9.23; \ln LDI = 9.58$$

$$I_{TFR} = 1 - \frac{2.43 - 1.5}{8 - 1.5} = .855$$

$$I_{Educ} = \frac{9.23 - 0}{17 - 0} = .543$$

$$I_{\ln LDI} = \frac{9.58 - 5.52}{11.00 - 5.52} = .741$$

$$SDI = \sqrt[3]{I_{TFR} * I_{Educ} * I_{\ln LDI}} = \sqrt[3]{.855 * .543 * .741} = .701$$

#### 4.5.2 Age-sex-specific relationships between SDI and cause-specific mortality rates

In order to evaluate the relationship between SDI and mortality, we fit a Gaussian process regression using a linear prior to the mean function within a stochastic partial differential equation (SPDE) framework.

We first assume the following:

$$\ln(Y_{iasc}) \sim N(\mu_i, \sigma^2)$$

Where  $Y_{i,asc}$  is the cause-specific mortality rate for a given level of SDI ( $i$ ), age group ( $a$ ), sex ( $s$ ), and cause ( $c$ ).

We then specify a linear prior to the mean  $\mu_i$ :

$$\mu_i = \alpha + \beta(SDI) + z_i$$

Where

$$z_i \sim GP(0, \Sigma_M)$$

$GP$  refers to a Gaussian process, and  $\Sigma_M$  refers to the Matern covariance function.

For causes where the relationship between SDI and mortality rates was markedly non-linear (eg, many neglected tropical diseases), we instead specified a continuous piecewise linear prior to the mean. The locations of these knots, as well as the slope and intercept parameters for each of the segments, were dynamically chosen such that they minimised the sum of squared residuals when fit to the data.

Using SPDE, we specified additional priors on the range, variance, and precision of the mean function, as well as selected the number of underlying bases. These hyperparameters were chosen empirically and were identical for all age-sex-cause combinations. Values for the selected hyperparameters are displayed in the table below.

| Hyperparameter  | Value                       |
|-----------------|-----------------------------|
| Range           | 0.2                         |
| Variance        | 1                           |
| Precision       | $1 \times 10^{10}$          |
| Number of bases | 2 (mesh points at 0.3, 0.7) |

Regressions were run separately by age-sex-cause, using observed cause-specific mortality rates from all years 1970–2016 to produce 10,000 simulations per level of SDI from 0 to 1 in increments of 0.005. We fit models on observations from all countries estimated in GBD and included state and province level estimates in lieu of national estimates for Brazil, China, and India due to their large populations (> 200 million) and small number of state-level units modelled in GBD (BRA – 27, IND – 31, CHN – 33) relative to population. Though the United States and Indonesia also fall under the designation of large-population (> 200 million), we fit models on national-level observations instead of state/province-level observations for these two countries as a result of the undue influence from the relatively large number of state-level units modelled in GBD relative to population (USA – 51, IDN – 34). Country and region dummy variables used in GBD 2015 were no longer included in this analysis. All models were fit using the INLA package in R.

In order to produce age-aggregates of our results, we used the same modelling framework as above. In this case, however, we regarded the logit of the share of population in each age group as the dependent variable to estimate a smoothed relationship between population age-structure and SDI. Predictions for each age group at each level of SDI were rescaled to sum to 100%.



## References

- 1 Lozano R, Freeman MK, James SL, *et al.* Performance of InterVA for assigning causes of death to verbal autopsies: multisite validation study using clinical diagnostic gold standards. *Popul Health Metr* 2011; **9**: 50.
- 2 Office of the Registrar General and Census Commissioner. India Special Survey of Deaths. India, 2004.
- 3 GBD 2016 Mortality Collaborators. Global, regional, and national under-5 mortality, adult mortality, age-specific mortality, and life expectancy, 1970-2016: a systematic analysis for the Global Burden of Disease Study 2016. *Lancet Rev* 2017.
- 4 Office of the Registrar General and Census Commissioner. India Medical Certification of Cause of Death Reports 1990-2010. India, 2014.
- 5 Office of the Registrar General and Census Commissioner. India Medical Certification of Cause of Death Reports 1980-1986. India.
- 6 Naghavi M, Makela S, Foreman K, O'Brien J, Pourmalek F, Lozano R. Algorithms for enhancing public health utility of national causes-of-death data. *Popul Health Metr* 2010; **8**: 9.
- 7 Ahern RM, Lozano R, Naghavi M, Foreman K, Gakidou E, Murray CJ. Improving the public health utility of global cardiovascular mortality data: the rise of ischemic heart disease. *Popul Health Metr* 2011; **9**: 8.
- 8 Barker B, Degenhardt L, National Drug and Alcohol Research Centre (Australia). Accidental drug-induced deaths in Australia 1997-2001. Sydney, Australia: National Drug and Alcohol Research Centre, University of New South Wales, 2003.
- 9 Roxburgh A, Burns L. Accidental drug-induced deaths due to opioids in Australia, 2011. Sydney, Australia: National Drug and Alcohol Research Centre, University of New South Wales, 2015.
- 10 Roxburgh A, Burns L. Cocaine and methamphetamine related drug-induced deaths in Australia, 2011. Sydney, Australia: National Drug and Alcohol Research Centre, University of New South Wales, 2015.
- 11 Naghavi M, Wang H, Lozano R, *et al.* Global, regional, and national age-sex specific all-cause and cause-specific mortality for 240 causes of death, 1990–2013: a systematic analysis for the Global Burden of Disease Study 2013. *The Lancet* 2015; **385**: 117–71.
- 12 Lozano R, Naghavi M, Foreman K, *et al.* Global and regional mortality from 235 causes of death for 20 age groups in 1990 and 2010: a systematic analysis for the Global Burden of Disease Study 2010. *The Lancet* 2012; **380**: 2095–128.
- 13 Calvert C, Ronsmans C. The contribution of HIV to pregnancy-related mortality: a systematic review and meta-analysis. *AIDS Lond Engl* 2013; **27**: 1631–9.
- 14 DerSimonian R, Laird N. Meta-analysis in clinical trials. *Control Clin Trials* 1986; **7**: 177–88.

- 15 Lozano R, Lopez AD, Atkinson C, Naghavi M, Flaxman AD, Murray CJ. Performance of physician-certified verbal autopsies: multisite validation study using clinical diagnostic gold standards. *Popul Health Metr* 2011; **9**: 32.
- 16 Foreman KJ, Lozano R, Lopez AD, Murray CJ. Modeling causes of death: an integrated approach using CODEm. *Popul Health Metr* 2012; **10**: 1.
- 17 Bell RM, Koren Y. Lessons from the Netflix Prize Challenge. *SIGKDD Explor Newsl* 2007; **9**: 75–79.
- 18 Bell RM, Koren Y, Volinsky C. All together now: A perspective on the NETFLIX PRIZE. *CHANCE* 2010; **23**: 24–24.
- 19 Flaxman AD, Vos T, Murray CJL, editors. *An Integrative MetaRegression Framework for Descriptive Epidemiology*, 1 edition. Seattle: University of Washington Press, 2015.
- 20 Todd S, Barr S, Passmore AP. Cause of death in Alzheimer’s disease: a cohort study. *QJM Mon J Assoc Physicians* 2013; **106**: 747–53.
- 21 Brunnström HR, Englund EM. Cause of death in patients with dementia disorders. *Eur J Neurol* 2009; **16**: 488–92.
- 22 Keene J, Hope T, Fairburn CG, Jacoby R. Death and dementia. *Int J Geriatr Psychiatry* 2001; **16**: 969–74.
- 23 Thomas BM, Starr JM, Whalley LJ. Death certification in treated cases of presenile Alzheimer’s disease and vascular dementia in Scotland. *Age Ageing* 1997; **26**: 401–6.
- 24 Ahmad OB, Boschi-Pinto C, Lopez AD, Murray CJL, Lozano R, Inoue M. Age standardization of rates: A new WHO standard. Geneva, Switzerland: World Health Organization, 2001 <http://www.who.int/healthinfo/paper31.pdf> (accessed May 20, 2017).
- 25 United Nations Department of Economic and Social Affairs. *World population prospects: the 2012 revision*. New York, NY: United Nations, 2013 [https://esa.un.org/unpd/wpp/Publications/Files/WPP2012\\_Volume-I\\_Comprehensive-Tables.pdf](https://esa.un.org/unpd/wpp/Publications/Files/WPP2012_Volume-I_Comprehensive-Tables.pdf).

## Section 5. Nonfatal outcome estimation

The GBD 2016 nonfatal estimation process is visually represented in Appendix Figures 1a and 1b illustrating the steps necessary to estimate incidence, prevalence, and YLDs for disease and injury sequelae in GBD 2016. Appendix Figure 1a outlines the general process of nonfatal outcome estimation from data inputs to finalization of YLD burden results; steps 3b and 3c of that process identify alternative modeling approaches employed for certain causes and injuries. Alternative approaches are illustrated in greater detail in Appendix Figure 1b. Conceptually, the estimation effort is divided into eight major components: (1) compiling data sources through data identification and extraction; (2) data adjustment; (3) estimation of prevalence and incidence by cause and sequelae using DisMod-MR 2.1 or alternative modeling strategies for selected cause groups; (4) estimation by impairment; (5) severity distributions; (6) incorporation of disability weights; (7) comorbidity adjustment; and (8) the estimation of YLDs by sequelae and causes. Appendix Section 3 contains additional detail specific to each disease, impairment and injury and their sequelae. Nonfatal modeling strategies vary significantly between causes.

### 5.1 Data sources, identification and extraction

#### 5.1.1 Systematic reviews

For GBD 2015, updated systematic reviews were conducted for 101 causes and sequelae using data available through January of 2015. For GBD 2016 we conducted literature reviews for 116 causes and 4 impairments. For other diseases, only a small fraction of the existing data appears in the published literature and other sources predominate such as survey data, disease registers, notification data, hospital inpatient data, or claims data. Data were systematically screened from household surveys archived in the Global Health Data Exchange ([ghdx.healthdata.org](http://ghdx.healthdata.org/)), including Demographic and Health Surveys, Multiple Indicator Cluster Surveys, Living Standards Measurement Surveys, and Reproductive Health Surveys. Other national health surveys were identified based on survey series that had yielded usable data for past rounds of GBD, sources suggested to us by in-country collaborators, and surveys identified in major multinational survey data catalogs, such as the International Household Survey Network and the World Health Organization (WHO) Central Data Catalog, as well as through country Ministry of Health and Central Statistical Office websites. Case notifications reported to the WHO were updated through 2016. Citations for all data sources used for nonfatal estimation in GBD 2016 are provided in searchable form through a web-tool (<http://ghdx.healthdata.org/>). A description of the search terms employed for cause-specific systematic reviews are detailed by cause in Appendix Section 3.

#### 5.1.2 Survey data preparation

For GBD 2016, survey data for which we had access to the unit record data constituted a substantial part of the underlying data used in the estimation process. During extraction, we concentrated on demographic variables (such as location, sex, age), survey design variables (such as sampling strategy and sampling weights), and the variables used to define the population estimate (such as prevalence or a

proportion) and a measure of uncertainty (standard error, confidence interval or sample size and number of cases).

### 5.1.3 Disease Registers

For GBD 2016 nonfatal estimation, disease registries were an important source for a select number of conditions such as cancers, end-stage renal disease, and congenital disorders. The GHDx source tool (<http://ghdx.healthdata.org/data-type/disease-registry>)<sup>2</sup> provides a comprehensive list of registry data used in GBD estimation processes.

### 5.1.4 Estimation of Hospital Envelope

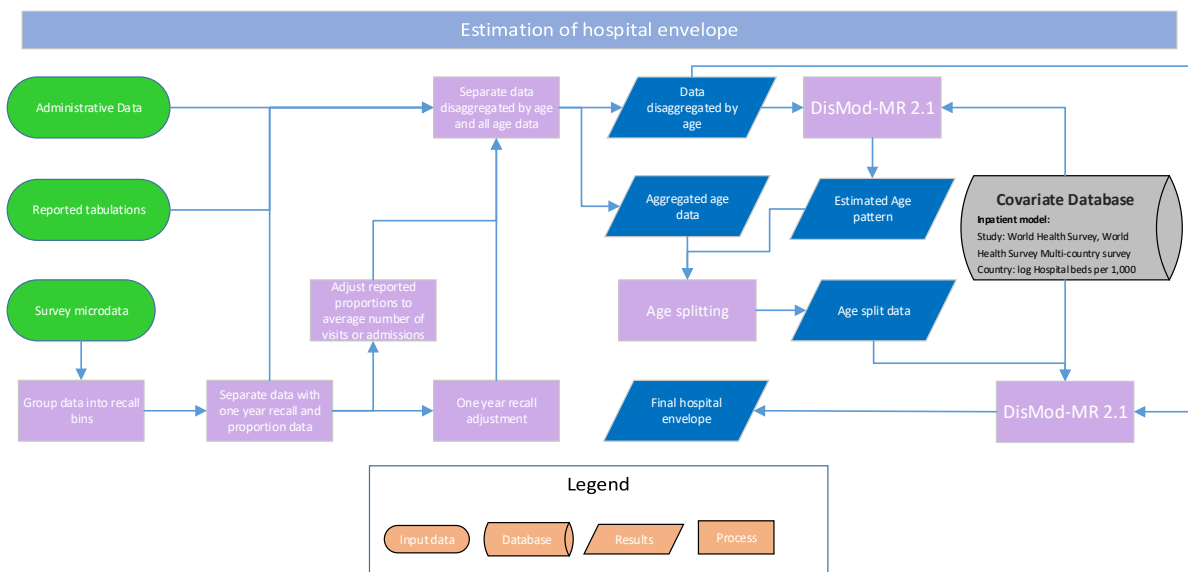

#### Input data and methodological summary

#### Case definition

We defined a hospital admission as the overnight admission into a formal healthcare facility but excluded admissions to long-term care (>120 days), nursing care facilities, and traditional or spiritual healers.

#### Input Data

We searched the Global Health Data Exchange for population surveys, administrative records, and censuses from January 1990 to September 2016. We applied five secondary data filters: “discharge”, “health facility”, “nationally representative”, “household”, or “outpatient.” We also applied ten keyword

filters: “healthcare access”, “health care costs”, “healthcare economics”, “healthcare expenditure”, “healthcare services”, “healthcare use”, “outpatient facilities”, “patient counts”, “hospitals”, or “length of stay”. We applied no language restrictions to our search and required all returned records to either contain microdata or tabulated reports. We searched the returned records’ metadata looking for measures of inpatient care. For inclusion, we required all measures to be nationally or subnationally representative. Additionally, we consulted with experts and GBD collaborators to gather data sources that were not within the Global Health Data Exchange. In total, we accepted data sources from 2,855 location-years (1,560 from administrative records and 1,295 from population surveys).

## Modeling Strategy

### *Data adjustment*

We classified each of the accepted data sources into four data types: (a) proportion of survey respondents who were admitted into the hospital in the past 30 days; (b) proportion of survey respondents who were admitted to the hospital in the past year; (c) average number of admissions (utilization rate) reported by survey respondents in the past year; and (d) average number of visits reported by annual administrative records. We assigned measures reported by annual administrative records as our reference group as these data types were free from recall bias and most closely matched our case definition. In data sources where microdata was available, we extracted and binned the data based on gender and age groups of under-1, 1-4, 4-9, 10-14, through till 95+ years of age.

We crosswalked each of the three non-reference (survey) data types to the reference (administrative record) data type through the use of penalized spline regressions to account for non-systematic differences between the data types. For each non-reference data type and each sex, we looked for overlap between the non-reference data type and reference data type on the basis of location, year, age group, and sex. With the overlapping data, we calculated the ratio of the point estimate from the reference data type,  $\mu_{ref}$ , to the non-reference data type,  $\mu_s$ . We fit these ratios with a penalized spline regression shown below

$$\ln\left(\frac{\mu_{ref,i}}{\mu_{s,i}}\right) = h(age_i) + \varepsilon_i \quad (1)$$

Where  $i$  denotes a given matched observation,  $h(age_i)$  represents a basis function which estimated a cross-validated penalized spline over the population weighted mean age of the age group, and  $\varepsilon$  represents the residual. In the below figures, for each non-reference data type, we plot the ratio of  $\mu_{ref}$  and  $\mu_s$  across age and by sex and the predictions from the penalized spline regressions.

**Figure. Global age-sex specific crosswalks to equate each non-reference data type top the reference data type.** For each non-reference data type and each sex, we plot the ratio of reference data points to non-reference data points, which were matched based on location, age group, year, and sex. Using a penalized spline regression, we estimated the crosswalk between each non-reference data type and the reference type. We plot the crosswalk and the associated prediction error below.

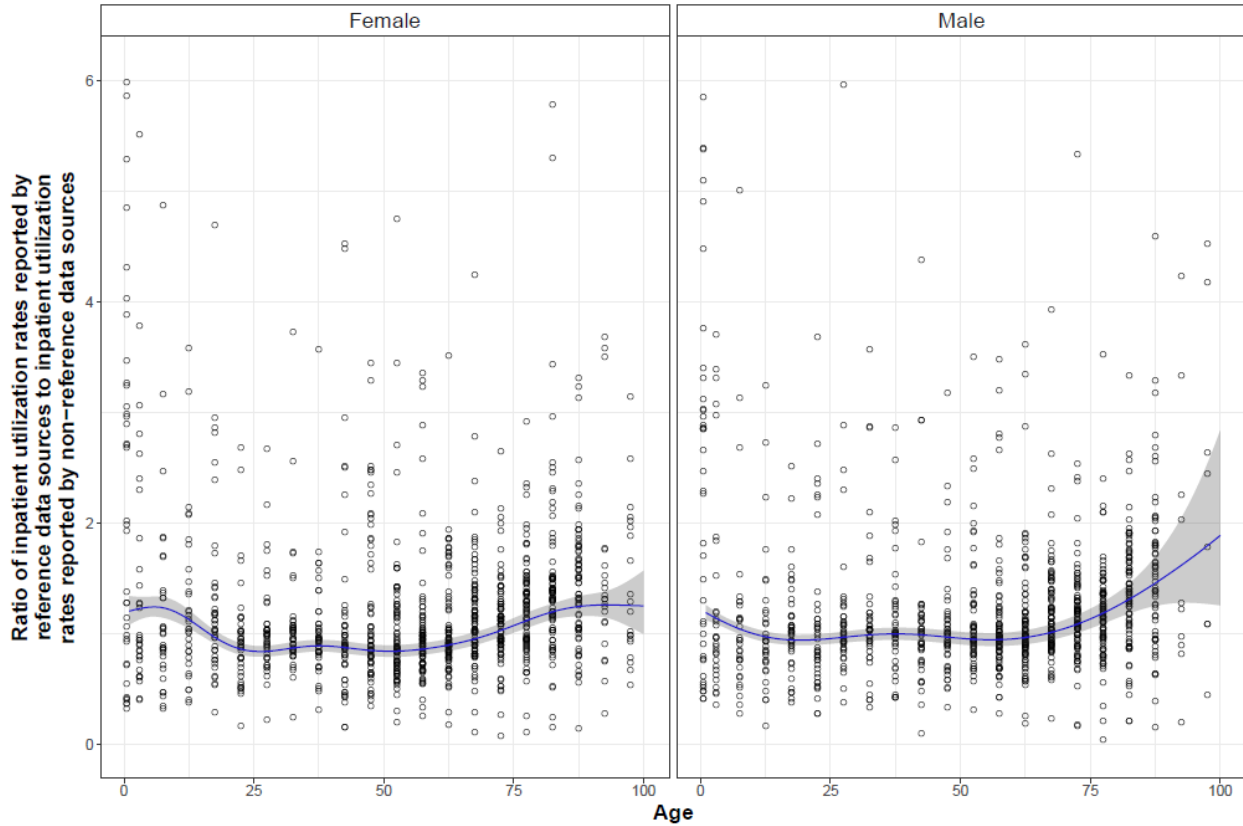

Ratio of inpatient utilization rates reported by reference data sources to proportion of respondents admitted into hospitals in the past year reported by non-reference data sources

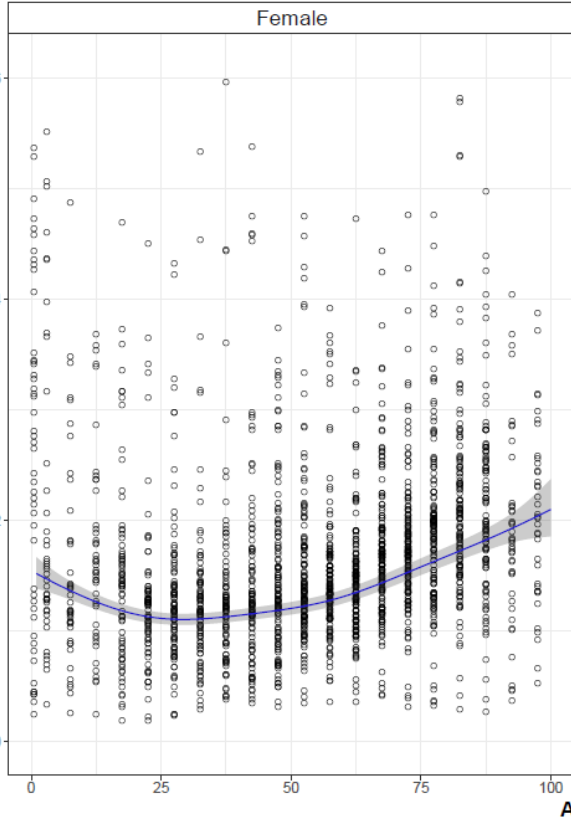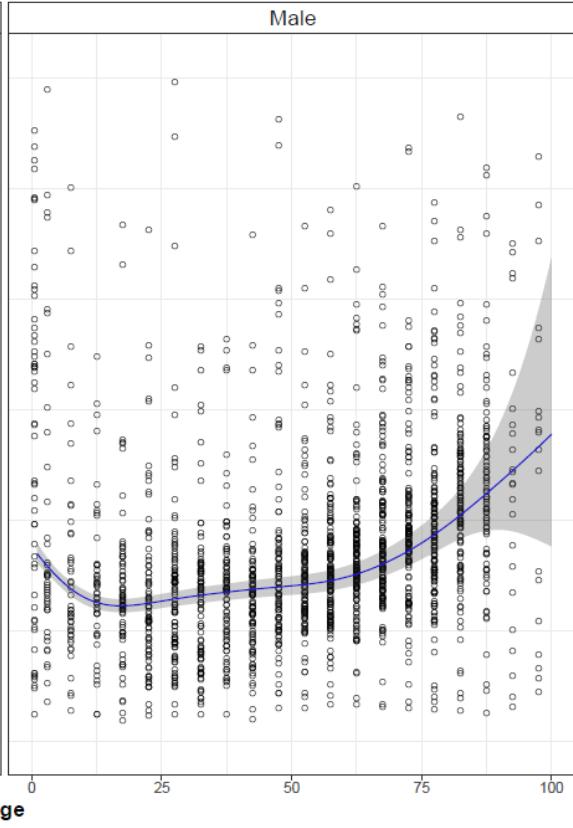

Ratio of inpatient utilization rates reported by reference data sources to proportion of respondents admitted into hospitals in the past year reported by non-reference data sources

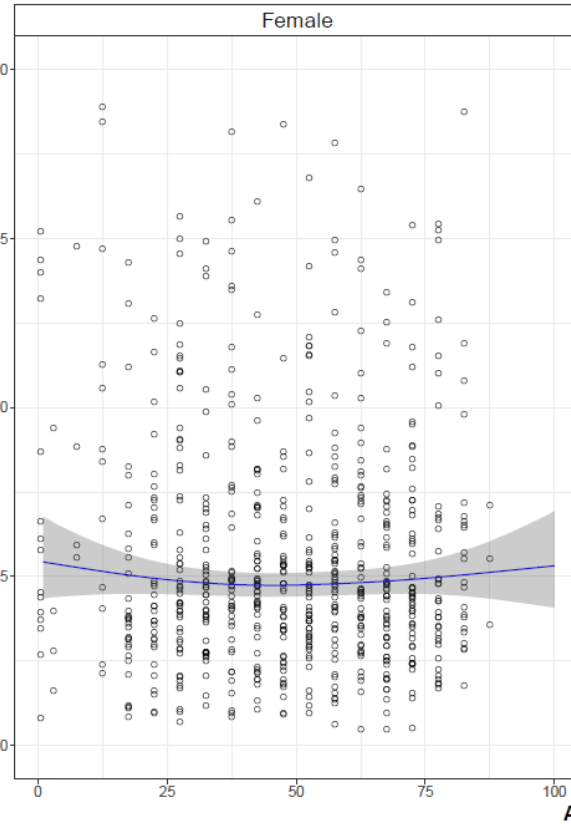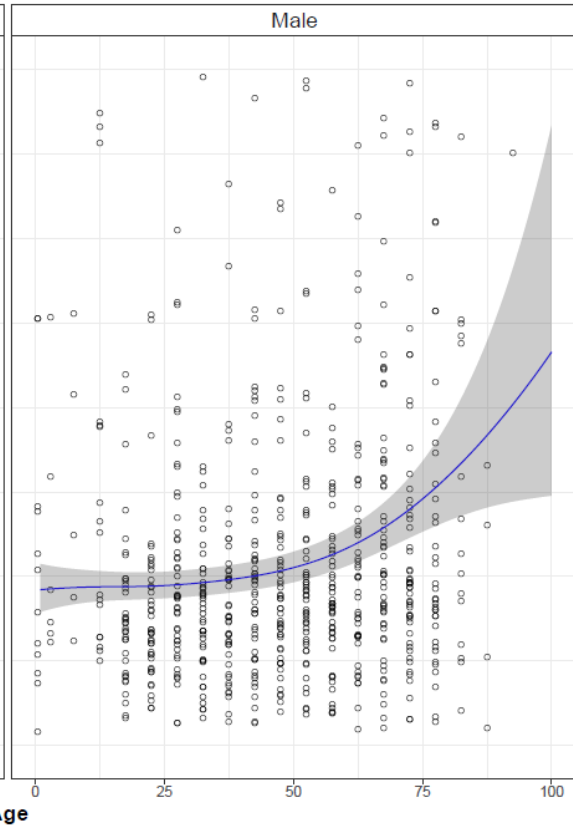

To crosswalk non-reference data types to reference data types, we multiplied non-reference data types by the exponentiated predictions from respective penalized spline regressions. Uncertainty from the adjustments were accounted for using the following equation

$$se_a = \sqrt{se_m^2 \cdot se_s^2 + se_m^2 \cdot \mu_s^2 + se_s^2 \cdot \mu_m^2} \quad (2)$$

Where  $se_a$ ,  $se_m$ , and  $se_s$  are the standard errors of the adjusted non-reference data point, the exponentiated crosswalk prediction, and the non-reference data point, respectively.  $\mu_s$  and  $\mu_m$  are the means of the non-reference data point and the exponentiated crosswalk predictions from the penalized spline regressions.

### *Age-sex splitting*

DisMod-MR 2.1 is capable of conducting age-integration but its performance degrades while integrating across wide age categories (e.g. all ages). To remedy this issue, we ran a DisMod-MR 2.1 model with data that was disaggregated by age to estimate countries' age-pattern and then applied the estimated age-pattern to split aggregated all age data. This procedure was operationalized by calculating a constant,  $k$ , which was the ratio of the aggregated all age data point,  $\mu_{all\ age}$ , to the all age estimated utilization rate from the DisMod-MR 2.1 model,  $\widehat{\mu}_a$

$$k = \frac{\mu_{all\ age}}{\widehat{\mu}_a} \quad (3)$$

The constant,  $k$ , was then multiplied by age specific utilization rates from the DisMod-MR 2.1 model. The uncertainty from the data and the age-pattern were propagated following equation 2. The split data were then incorporated into the final DisMod-MR 2.1 model.

### *DisMod Modeling*

To help explain variation in locations with little to no data, we used the country level covariate of natural log of hospital beds per 1,000. Study level covariates were used to denote World Health Surveys and World Health Organization's Multi-Country Survey Study on Health System Responsiveness. The country-level covariate of hospital beds per 1,000 was estimated using ST-GPR on data sourced from the World Bank. The study-level covariates were used as these two survey series were systematically higher than data points from other sources in the same locations and time period. Coefficients for the covariates are presented in below table.

**Table. Estimated coefficients of the hospital envelope model.**



Study-level covariates denote global dichotomous covariates that serve to adjust corresponding data points

| Covariate                                                                         | type          | Coefficient           | Exponentiated coefficient |
|-----------------------------------------------------------------------------------|---------------|-----------------------|---------------------------|
| World Health Survey                                                               | Study-level   | 0.44<br>(0.39 – 0.48) | 1.55<br>(1.48 – 1.61)     |
| World Health Organization Multi-country Survey Study on Health and Responsiveness | Study-level   | 0.49<br>(0.42 – 0.55) | 1.63<br>(1.52 – 1.73)     |
| log Hospital beds per 1,000                                                       | Country-level | 0.17<br>(0.16 – 0.19) | 1.19<br>(1.17 – 1.20)     |

### 5.1.5 Claims, inpatient hospital, and outpatient data

For GBD 2016, claims (linkage) data, inpatient hospital, and outpatient data played a key role in the nonfatal estimation process of many GBD causes.

#### *Claims data*

For GBD 2016, we accessed aggregate data derived from claims information in a database of US private health insurance and public insurance schemes of Medicaid and Medicare, for the years 2000, 2010, and 2012, commonly referred to as Marketscan. The population covered in each year was 3.3 million in 2000, 40.4 million in 2010, and 40.8 million in 2012. For each of these individuals, information on every health service encounter was collected and all episodes of care were linked to individuals by unique identifiers, which allowed us to aggregate data in multiple ways, including creating counts of claims and individuals for inpatient and outpatient care. Marketscan has fifteen diagnosis columns for both inpatient and outpatient episodes. We mapped all ICD-9 four- or five-digit-coded diagnoses to GBD causes (see Appendix Table 4). GBD conditions were categorized as “long-term” or “short-term” depending on cause duration. In a given year, for each individual in the claims data, a long-term case was defined as any mention in any diagnostic field associated with any claim, including inpatient and outpatient encounters. A short-term case was defined the same way, but assumed that claims within a condition-specific duration were the same case. In this way, an individual could have multiple short-term conditions in a given year, while avoiding double-counting cases with multiple claims from a single illness episode.

In GBD 2015, a subset of available facility types were used for short-term causes in outpatient claims data. In GBD 2016, we added more facility types, including the “office visit” facility type, which accounts for more than 50% of all outpatient data.

## GBD 2016 Marketscan/Claims data extraction process

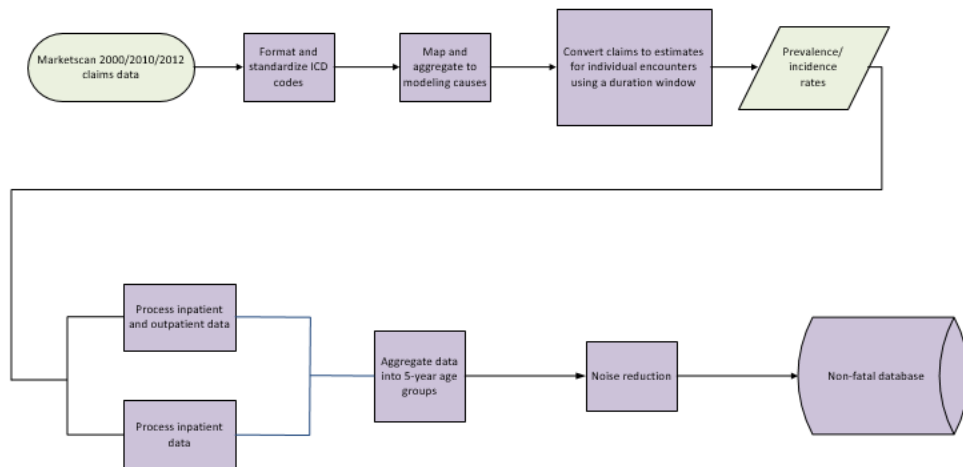

### *Inpatient hospital admissions*

Inpatient hospital data were extracted from 3557 location-years in 41 countries. ICD coding was standardized across sources, and versions of ICD (Appendix Table 4).

For GBD 2015, one limitation of our use of hospital data in non-fatal disease estimation was the challenge of accessing accurate information on coverage populations for any given data source. Section 2.1.4 of the appendix describes the modeling strategy for the hospital envelope, an estimate of hospital utilization, i.e. the rate of inpatient episodes per capita by age, sex, year and location. For GBD 2016, we used this hospital utilization envelope in place of information on coverage population. We calculated demographic-specific (by age, sex, year, and location) cause fractions in each inpatient hospital data source and multiplied these by the hospital utilization envelope to produce a rate of incidence/prevalence in inpatient admissions. For countries with completed registration of all inpatient episodes, this method makes little difference compared to the previous approach of dividing inpatient episode numbers by population as the all-cause inpatient rates per population from these sources were inputs to the utilization model. For countries with incomplete coverage, where in the past we had to make assumptions on the proportion of the population covered or reject the source because of unknown catchment population, this method is an improvement.

Using the Marketscan claims data described above (with the exception of Marketscan 2000 data, due to the low coverage compared to two later years), we generated three scalars that were applied to the product of cause fractions generated by the inpatient hospital data and the utilization envelope on a

cause-by-cause basis. The scalars account for bias in inpatient hospital data from sources which were aggregated by ICD code and by primary diagnosis only. First, we corrected to account for multiple admissions for an individual. Second, we adjusted for non-primary diagnoses. Third, we corrected to account for inpatient and outpatient care. Combined with the uncorrected version (no scalar applied), this resulted in four types of incidence and prevalence estimates from inpatient hospital data: 1) (uncorrected) inpatient admissions by episode, primary diagnosis, 2) inpatient admissions by individual, primary diagnosis only, 3) inpatient hospital admissions, accounting for all diagnoses, 4) an estimate of any inpatient admission or outpatient visit by an individual, accounting for all diagnoses. These data were reviewed in conjunction with data from all other sources for each model that utilizes hospital data to determine which type of data adjustment was most appropriate as an input to non-fatal disease estimation.

The equations we used for each of the three scalars can be found below:

- a) Adjustment to account for multiple admissions which gave us inpatient admissions by individual, primary diagnosis only

$$a. \text{inpatient}_{episode}^{1^\circ} * \left( \frac{MS \text{inpatient}_{indiv}^{1^\circ}}{MS \text{inpatient}_{episode}^{1^\circ}} \right) = \text{inpatient}_{indiv}^{1^\circ}$$

- b) Adjustment for non-primary diagnoses which gave us inpatient admissions by individual, all diagnoses

$$a. \text{inpatient}_{episode}^{1^\circ} * \left( \frac{MS \text{inpatient}_{indiv}^{all}}{MS \text{inpatient}_{episode}^{1^\circ}} \right) = \text{inpatient}_{indiv}^{all}$$

- c) Adjustment to account for inpatient and outpatient care which gave us inpatient admissions and outpatient visits by individual, all diagnoses

$$a. \text{inpatient}_{episode}^{1^\circ} * \left( \frac{MS \text{inpatient}_{indiv}^{all} \cup MS \text{outpatient}_{indiv}^{all}}{MS \text{inpatient}_{episode}^{1^\circ}} \right) = \text{inpatient|outpatient}_{indiv}^{all}$$

For maternal causes, a new bundle was created that had every maternity-related ICD code mapped to it. At the end of the process, each maternal cause rate was divided by the rate of this all maternity bundle in order to adjust the denominators from population to live births.

Congenital and neonatal causes with similar age patterns were aggregated to create correction factors because the data in individual causes were too sparse to make them reasonable, and would leave the age pattern mostly flat. Injuries used a separate correction factor as well.

These scalars were then smoothed by fitting a Loess curve to the observed data for each combination of cause and sex. The span of the Loess smoothing varied depending on how many observable data points there were. For cause/sex subsets with 5 or fewer observations a span (fraction of number of points to

consider when fitting a curve) of 1 was set. For 6 to 10 observations, a span of 0.75 was set, and for 11 or more observations, a span of 0.5 was set.

In cases where the third scalar, accounting for inpatient and outpatient care, was greater than 50, we determined it to be unstable and did not apply this scalar to the hospital data. Exceptions to this rule were for congenital and neonatal causes (preterm births, neonatal hemolytic disease, encephalopathy, sepsis), where babies hospitalized with these conditions often have comorbid states that make it very likely that the given code would not be listed as primary, as well as peripheral arterial disease and cirrhosis. For these causes, the exception is 100.

### GBD 2016 Inpatient hospital data extraction process

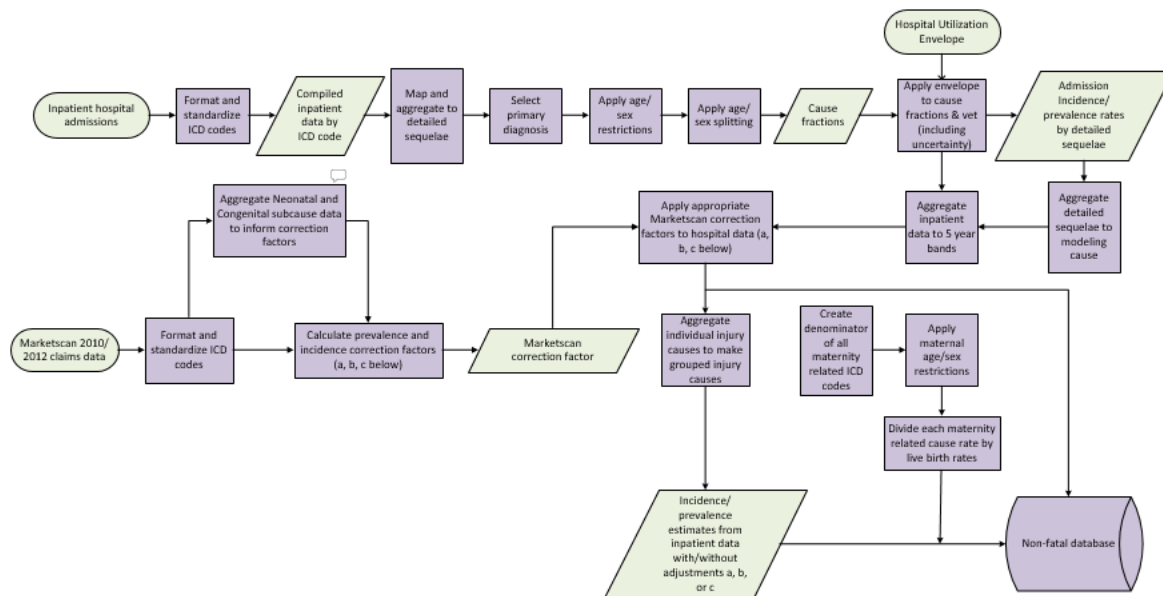

### Outpatient

Outpatient encounter data were available from the US and Sweden for 68 location-years. In GBD 2016, Brazil and Mexico were included, but we dropped them this year due to lack of reliability (biases related to types of hospitals that were included in the datasets, etc). No changes were made in the processing of outpatient data from GBD 2015, aside from updates to the ICD mappings to GBD cause.

Similar to the inpatient hospital data, a scalar was calculated using MarketScan claims data to adjust for multiple visits per individual within one year (for long-term conditions), and within a cause-specific duration (for short-term causes). However, for the outpatient correction factor, we kept only 3 outpatient facility types (office, outpatient hospital, and outpatient NEC).

**Table: Facility types used in outpatient MarketScan data**

| <b>Outpatient Facility Name</b> | <b>Used in GBD 2015 for Incidence</b> | <b>Used in GBD 2016 for Incidence</b> | <b>Used in Outpatient Correction Factor</b> |
|---------------------------------|---------------------------------------|---------------------------------------|---------------------------------------------|
| Office                          | no                                    | yes                                   | yes                                         |
| Outpatient Hospital             | yes                                   | yes                                   | yes                                         |
| Independent Laboratory          | yes                                   | no                                    | no                                          |
| Emergency Room - Hospital       | yes                                   | yes                                   | no                                          |
| Patient Home                    | yes                                   | yes                                   | no                                          |
| Inpatient Hospital              | no                                    | yes                                   | no                                          |
| Ambulatory Surgical Center      | no                                    | yes                                   | no                                          |
| End-Stage Renal Disease Facil   | no                                    | yes                                   | no                                          |
| Other Unlisted Facility         | no                                    | yes                                   | no                                          |
| Outpatient (NEC)                | no                                    | yes                                   | yes                                         |
| Skilled Nursing Facility        | no                                    | yes                                   | no                                          |
| Urgent Care Facility            | no                                    | yes                                   | no                                          |
| Ambulance (land)                | no                                    | yes                                   | no                                          |
| Independent Clinic              | no                                    | yes                                   | no                                          |
| Comprehensive Outpt Rehab Fac   | no                                    | yes                                   | no                                          |

|                                |    |     |    |
|--------------------------------|----|-----|----|
| Nursing Facility               | no | yes | no |
| Hospice                        | no | yes | no |
| Pharmacy (1)                   | no | no  | no |
| Rural Health Clinic            | no | yes | no |
| State/Local Public Health Clin | no | yes | no |
| Birthing Center                | no | yes | no |
| Community Mental Health Center | no | yes | no |
| Federally Qualified Health Ctr | no | yes | no |
| Psych Facility Partial Hosp    | no | yes | no |
| Residential Subst Abuse Facil  | no | yes | no |
| Mass Immunization Center       | no | yes | no |
| Custodial Care Facility        | no | yes | no |
| Comprehensive Inpt Rehab Fac   | no | yes | no |
| Psych Residential Treatmnt Ctr | no | yes | no |
| Inpatient Long-Term Care (NEC) | no | yes | no |
| Mobile Unit                    | no | yes | no |
| Assisted Living Facility       | no | yes | no |
| School                         | no | yes | no |
| Inpatient Psychiatric Facility | no | yes | no |
| Walk-in Retail Health Clinic   | no | yes | no |
| Military Treatment Facility    | no | yes | no |
| Pharmacy (2)                   | no | no  | no |
| Other Inpatient Care (NEC)     | no | yes | no |
| Ambulance (air or water)       | no | yes | no |
| Non-resident Subst Abuse Facil | no | yes | no |
| Intermed Care/Mental Retarded  | no | yes | no |
| Group Home                     | no | yes | no |
| Adult Living Care Facility     | no | yes | no |

|                   |    |     |    |
|-------------------|----|-----|----|
| Temporary Lodging | no | yes | no |
| Homeless Shelter  | no | yes | no |
| MISSING           | no | yes | no |

**Table: Durations of causes**

| Duration in Days | GBD Cause                                                                                                                                                                                                                                                                                                                                                                                                                                                                                                                                                                                                                                                                                                                                                                                                                                                                                                                                                                                                                                                                                  |
|------------------|--------------------------------------------------------------------------------------------------------------------------------------------------------------------------------------------------------------------------------------------------------------------------------------------------------------------------------------------------------------------------------------------------------------------------------------------------------------------------------------------------------------------------------------------------------------------------------------------------------------------------------------------------------------------------------------------------------------------------------------------------------------------------------------------------------------------------------------------------------------------------------------------------------------------------------------------------------------------------------------------------------------------------------------------------------------------------------------------|
| 28               | diarrheal diseases, clostridium difficile, pelvic inflammatory disease, acute otitis media, myocardial infarction due to ischemic heart disease, first ever acute hemorrhagic stroke, first ever acute ischemic stroke, upper respiratory infections, peptic ulcer disease, symptomatic episodes, gastritis and duodenitis, symptomatic episodes, appendicitis, vascular intestinal disorders, paralytic ileus and intestinal obstruction, gallbladder and biliary diseases, symptomatic episodes, pancreatitis cases, interstitial nephritis and urinary tract infections, acute urolithiasis, acute myocarditis, pelvic inflammatory disease due to gonococcal infection, cerebrovascular disease acute, pelvic inflammatory disease due to chlamydial infection                                                                                                                                                                                                                                                                                                                         |
| 30               | influenza                                                                                                                                                                                                                                                                                                                                                                                                                                                                                                                                                                                                                                                                                                                                                                                                                                                                                                                                                                                                                                                                                  |
| 60               | acute other sense organ diseases, lower respiratory infections                                                                                                                                                                                                                                                                                                                                                                                                                                                                                                                                                                                                                                                                                                                                                                                                                                                                                                                                                                                                                             |
| 90               | typhoid fever, paratyphoid fever, abscess and other bacterial skin diseases, other meningitis -- viral, gonococcal infection, trichomoniasis infection, adverse effects of medical treatment, foreign body in eyes, acute glomerulonephritis, cellulitis, impetigo, foreign body in other body part, pulmonary aspiration and foreign body in airway, other transport injuries, cyclist road injuries, motor vehicle road injuries, motorcyclist road injuries, other road injuries, pedestrian road injuries by road vehicle, poisonings, falls, fire, heat, and hot substances, environmental heat and cold exposure , other unintentional injuries, venomous animal contact, non-venomous animal contact, exposure to forces of nature, drowning, unintentional suffocation, other exposure to mechanical forces, unintentional firearm injuries, self-harm by other specified means, self-harm by firearm, sexual violence, assault by other means, assault by firearm, assault by sharp object, executions and police conflict, conflict and terrorism, typhoid and paratyphoid fever |
| 120              | acute encephalitis                                                                                                                                                                                                                                                                                                                                                                                                                                                                                                                                                                                                                                                                                                                                                                                                                                                                                                                                                                                                                                                                         |

|     |                                                                                                                                                                                                                                                                                                                                                                                                                                                                                                                                                                                                                                                                                                                                                                               |
|-----|-------------------------------------------------------------------------------------------------------------------------------------------------------------------------------------------------------------------------------------------------------------------------------------------------------------------------------------------------------------------------------------------------------------------------------------------------------------------------------------------------------------------------------------------------------------------------------------------------------------------------------------------------------------------------------------------------------------------------------------------------------------------------------|
| 180 | endocarditis, early syphilis infection, chlamydial infection, maternal abortive outcome                                                                                                                                                                                                                                                                                                                                                                                                                                                                                                                                                                                                                                                                                       |
| 365 | diphtheria remission, whooping cough, meningitis nonfatal overall, mild impairment due to neonatal tetanus, varicella seroprevalence, measles, visceral leishmaniasis, cutaneous and mucocutaneous leishmaniasis, symptomatic cystic echinococcosis, disfigurement due to basal cell carcinoma, cutaneous squamous cell carcinoma, Guillain-Barré syndrome, ectopic pregnancy incidence ratio, maternal hemorrhage, hypertensive disorders of pregnancy, other maternal infections, obstructed labor, acute event, puerperal sepsis, decubitus ulcer, meningococcal meningitis incidence proportion, other meningitis incidence proportion, H influenza type b meningitis incidence proportion, pneumococcal meningitis incidence proportion, severe pre-eclampsia, eclampsia |

## GBD 2016 Outpatient data extraction process

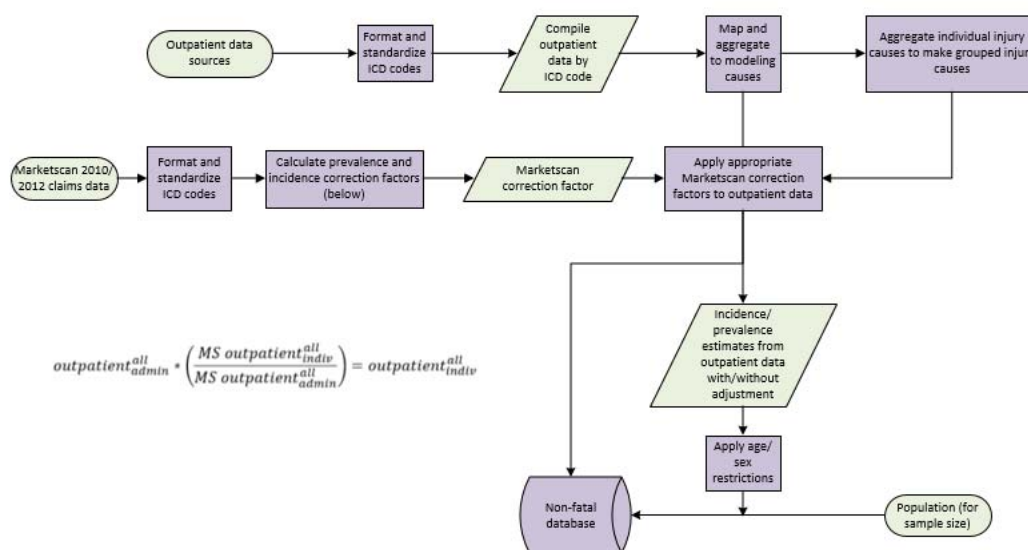

### 5.1.6 Case notifications

Case notifications, active screening, intervention coverage studies, and surveillance contributed to estimates of infectious diseases. If available, we extracted data from survey and administrative microdata; otherwise, data were extracted from published literature and reports. For many infectious diseases and



neglected tropical diseases (NTDs), we made use of cases notified by countries to the World Health Organization (WHO) and other global monitoring entities. The causes for which we use WHO case notification data included tuberculosis (TB), measles, yellow fever, rabies, dengue, cholera, whooping cough, human African trypanosomiasis (HAT), meningitis, all sexually transmitted infections (STIs), and other infectious and NTDs, such as Ebola.

## 2.2 Data adjustment

In addition to the corrections applied to claims and hospital data, a number of other adjustments were applied to extracted nonfatal sources in order to make the data more consistent and suitable for modeling. In this second step of nonfatal estimation, commonly applied adjustments included age-sex splitting, adding study-level covariates, bias correction, adjustments for underreporting of notification data, and computing expected values of excess mortality.

Age-sex splitting was commonly applied to literature data reported by age or sex but not by age and sex. For GBD2016, we split all data reported in age groups with a width greater than 20 years, using age patterns from available survey microdata or regional patterns derived from an initial run of main modeling tool, DisMod-MR 2.1. We relied on the meta-regression component of DisMod-MR 2.1 for many of the bias correction of data for variations in study attributes such as case definitions and measurement method. DisMod-MR 2.1 calculates a single adjustment that is applied regardless of age, sex, or location. If enough data were available to differentiate these adjustments by age, sex, or location, or if detailed survey data were available to make more precise adjustments between different thresholds on a biochemical measure, we applied bias corrections to the data before entry into DisMod-MR 2.1. For instance, we crosswalked between 15 different case definitions with different thresholds of fasting plasma glucose or glycated hemoglobin levels for diabetes mellitus based on available survey data with individual records of the actual measurements. In another example, we corrected data reporting on one-year prevalence instead of point prevalence of alcohol dependence by age using studies reporting on both measures, as the average duration of alcohol dependence is greater in middle-aged and older individuals compared to young adults. The correction of notification data for underreporting relied on studies that had examined the gap between true incidence and notified cases.

In GBD 2016, we estimated expected values of excess mortality from prevalence or incidence and cause-specific mortality rate (CSMR) data for every cause for which deaths were estimated with the exception of a few causes with very low mortality rates such as uterine fibroids. We matched every prevalence data point (or incidence data for short-duration conditions) with the CSMR value corresponding to the age range, sex, year, and location of the data point. We restricted this to data points reporting age-groups spanning 20 years or less. The ratio of CSMR to prevalence (or incidence times a short duration) is conceptually equivalent to an excess mortality rate. To reflect a gradient in excess mortality, we added in all relevant models the log of lag distributed income (LDI) or the health access and quality index (HAQI) as a country covariate for excess mortality, with a strong prior that as LDI increases, excess mortality declines.

## 5.3 DisMod-MR 2.1 Estimation

### *a. Estimation of sequelae and causes*

The most extensively used estimation method was the Bayesian meta-regression method DisMod-MR 2.1. For some causes such as HIV/AIDS or hepatitis B and C, disease-specific natural history models have been used where the underlying three state model in DisMod-MR 2.1 (susceptible, cases, dead) is insufficient to capture the complexity of a disease process. For some diseases with a range of sequelae differentiated by severity, such as chronic obstructive pulmonary disease (COPD) or diabetes mellitus, DisMod-MR 2.1 was used to meta-analyze the data on overall prevalence with separate DisMod-MR 2.1 models of the proportions of cases with different severity levels or sequelae. Likewise, DisMod-MR 2.1 was used to meta-analyze data on the proportions of liver cancer and cirrhosis due to underlying etiologies such as hepatitis B, hepatitis C, and alcohol use.

### *b. DisMod-MR 2.1 description*

Until GBD 2010, nonfatal estimates in burden of disease assessments were based on a single data source on prevalence, incidence, remission or a mortality risk selected by the researcher as most relevant to a particular location and time. For GBD 2010, we set a more ambitious goal: to evaluate all available information on a disease that passed a minimum quality standard. That required a different analytical tool that would be able to pool disparate information presented in varying age groupings and from data sources using different methods. The DisMod-MR 1.0 tool used in GBD 2010 evaluated and pooled all available data, adjusted data for systematic bias associated with methods that varied from the reference and produced estimates by world regions with uncertainty intervals using Bayesian statistical methods. For GBD 2013, the improved DisMod-MR 2.0 had increased computational speed allowing computations that were consistent between all disease parameters at the country rather than region level. The hundred-fold increase in speed of DisMod-MR 2.0 was partly due to a more efficient rewrite of the code in C++ but also by changing to a model specification using log rates rather than a negative binomial model used in DisMod-MR 1.0. In cross-validation tests, the log rates specification worked as well or better than the negative binomial specification.<sup>3</sup> For GBD2015, we rewrote the ‘wrapper’ code that organizes the flow of data and settings at each level of the analytical cascade. The sequence of estimation occurs at five levels: global, super-region, region, country and, where applicable, subnational location. The super-region priors are generated at the global level with mixed-effects, nonlinear regression using all available data; the super-region fit, in turn, informs the region fit, and so on down the cascade. The wrapper gives analysts the choice to branch the cascade in terms of time and sex at different levels depending on data density. The default used in most models is to branch by sex after the global fit but to retain all years of data until the lowest level in the cascade. Appendix Figure 2 below summarizes the DisMod-MR process.

In updating the ‘wrapper,’ we consolidated the code base into a single language, Python, to make the code more transparent and efficient and to better deal with subnational estimation. The computational engine is limited to three levels of random effects; we differentiate estimates at the super-region, region and country level. In GBD 2013, the subnational units of China, the UK and Mexico were treated as ‘countries’ such that a random effect was estimated for every location with contributing data. However, the lack of a hierarchy between country and subnational units meant that the fit to country data contributed as much to the estimation of a subnational unit as the fits for all other countries in the region. We found inconsistency between the country fit and the aggregation of subnational estimates when the country’s epidemiology varied from the average of the region. Adding an additional level of random effects required a prohibitively comprehensive rewrite of the underlying DisMod-MR engine. Instead, we added a fifth layer to the cascade, with subnational estimation informed by the country fit and country covariates, plus an adjustment based on the average of the residuals between the subnational location’s available data and its prior. This mimicked the impact of a random effect on estimates between subnationals.

In GBD 2015, we also improved how country covariates differentiate nonfatal estimates for diseases with sparse data. The coefficients for country covariates were re-estimated at each level of the cascade. For a given location, country coefficients were calculated using both data and prior information available for that location. In the absence of data, the coefficient of its parent location was used, in order to utilize the predictive power of our covariates in data sparse situations.

For GBD 2016, the computational engine (DisMod-MR 2.1) remained substantively unchanged from GBD 2015. We changed the prediction year set to generate fits for the years 1990, 1995, 2000, 2005, 2010, and 2016. We updated the age prediction sets to include age groups 80-84, 85-89, 90-94, and 95+, to comply with changes across all functional areas of the GBD. We also expanded the set of locations where subnational units are modeled; the set now includes: Brazil, China, England, India, Indonesia, Japan, Kenya, Mexico, Saudi Arabia, South Africa, Sweden, and the United States.

### *c. DisMod-MR 2.1 likelihood estimation*

Analysts have the choice of using a Gaussian, log-Gaussian, Laplace or Log-Laplace likelihood function in DisMod-MR 2.1. The default log-Gaussian equation for the data likelihood is:

$$-\log[p(y_j|\Phi)] = \log(\sqrt{2\pi}) + \log(\delta_j + s_j) + \frac{1}{2} \left( \frac{\log(a_j + \eta_j) - \log(m_j + \eta_j)}{\delta_j + s_j} \right)^2$$

where,  $y_j$  is a ‘measurement value’ (i.e., data point);  $\Phi$  denotes all model random variables;  $\eta_j$  is the offset value, eta, for a particular ‘integrand’ (prevalence, incidence, remission, excess mortality rate, with-condition mortality rate, cause-specific mortality rate, relative risk or standardized mortality ratio) and  $a_j$  is the adjusted measurement for data point  $j$ , defined by:

$$a_j = e^{(-u_j - c_j)} y_j$$

where  $u_j$  is the total ‘area effect’ (i.e., the sum of the random effects at three levels of the cascade: super-region, region and country) and  $c_j$  is the total covariate effect (i.e., the mean combined fixed effects for sex, study level and country level covariates), defined by:

$$c_j = \sum_{k=0}^{K[I(j)]-1} \beta_{I(j),k} \hat{X}_{k,j}$$

with standard deviation

$$s_j = \sum_{l=0}^{L[I(j)]-1} \zeta_{I(j),l} \hat{Z}_{k,j}$$

where  $k$  denotes the mean value of each data point in relation to a covariate (also called x-covariate);  $I(j)$  denotes a data point for a particular integrand,  $j$ ;  $\beta_{I(j),k}$  is the multiplier of the  $k^{\text{th}}$  x-covariate for the  $i^{\text{th}}$  integrand;  $\hat{X}_{k,j}$  is the covariate value corresponding to the data point  $j$  for covariate  $k$ ;  $l$  denotes the standard deviation of each data point in relation to a covariate (also called z-covariate);  $\zeta_{I(j),k}$  is the multiplier of the  $l^{\text{th}}$  z-covariate for the  $i^{\text{th}}$  integrand; and  $\delta_j$  is the standard deviation for adjusted measurement  $j$ , defined by:

$$\delta_j = \log[y_j + e^{(-u_j - c_j)} \eta_j + c_j] - \log[y_j + e^{(-u_j - c_j)} \eta_j]$$

Where  $m_j$  denotes the model for the  $j^{\text{th}}$  measurement, not counting effects or measurement noise and defined by:

$$m_j = \frac{1}{B(j) - A(j)} \int_{A(j)}^{B(j)} I_j(a) da$$

where  $A(j)$  is the lower bound of the age range for a data point;  $B(j)$  is the upper bound of the age range for a data point; and  $I_j$  denotes the function of age corresponding to the integrand for data point  $j$ .

## 5.4 Impairment and Underlying Cause Estimation

For GBD 2016, as in GBD 2015, we estimated the country-age-sex-year prevalence of nine impairments – step 4 of Appendix Figure 1a. Impairments in GBD are conditions or specific domains of functional health loss which are spread across many GBD causes as sequelae and for which there are better data to estimate the occurrence of the overall impairment than for each sequela based on the underlying cause. These impairments included: anaemia, epilepsy, hearing loss, heart failure, intellectual disability, infertility, vision loss, Guillain-Barré syndrome, and pelvic inflammatory disease. Overall impairment prevalence was estimated using DisMod-MR 2.1. We constrained cause-specific estimates of impairments, as in the 19 causes of blindness, to sum to the total prevalence estimated for that

impairment. Anaemia, epilepsy, hearing loss, heart failure, and intellectual disability were estimated at different levels of severity. Estimates were made separately for primary infertility (those unable to conceive), secondary infertility (those having trouble conceiving again), and whether the impairment affected men and/or women. In the case of epilepsy, we determined the proportions with idiopathic and secondary epilepsy as well as the proportions with severe and less severe epilepsy using mixed effects regressions. The sparse data for the proportion of seizure-free, treated epilepsy were pooled in a random effects meta-analysis. DisMod-MR 2.1 models produced country-, age-, sex-, and year-specific severity levels of hearing loss and vision loss. Due to limited information on the severity levels of intellectual disability, we assumed a similar distribution of severity globally, based on random effects meta-analysis of IQ-specific data for the overall impairment. This was supplemented by cause-specific severity distributions for chromosomal causes and iodine deficiency; the severity of intellectual disability included in the long-term sequelae of causes including neonatal disorders, meningitis, encephalitis, neonatal tetanus, and malaria was estimated in combined health states of multiple impairments such as motor impairment, blindness, and/or seizures.<sup>14</sup> For GBD 2015, we changed the name of the intellectual disability impairment to specify that estimates reflect cases arising during the developmental period which we have defined as ages below 20. The severity of heart failure was derived from our Medical Expenditure Panel Surveys (MEPS) analysis and therefore was not specific for country, year, age, or sex. A detailed description of the methods of each impairment can be found at the end of Section 3 of this appendix.

#### **5.4.1 Impairment squeeze**

For impairments like epilepsy, intellectual disability, and blindness, mentioned above in Step 4, we often have better information regarding the total prevalence of the impairment rather than the prevalence of said impairment due to its various causes. For example, we have more data and a better idea of the total number of blind individuals (which we refer to herein as the blindness "envelope") in the world than we do for the number of individuals who are blind due to a specific cause like retinopathy of prematurity or cataract. We achieve this consistency by either "squeezing" or inflating the individual sequela prevalence values so that their sums fit into each appropriate envelope. Blindness, epilepsy and/or intellectual disability appear in various combinations with motor impairment levels as sequelae for a number of neonatal disorders and infectious diseases like malaria and neonatal tetanus ("Moderate motor impairment with blindness and epilepsy due to neonatal tetanus," for example). This presents an extra challenge as any squeeze or inflation of one of the impairments making up a sequela will affect the others. We set some rules on how to do these adjustments sequentially. First, when the envelope of an impairment is smaller than the sum of all contributing causes, we redistribute the 'excess' prevalent cases of combined impairment sequelae onto the sequelae that only have motor impairment (at mild, moderate or severe level) within the same cause grouping. Second, we apply the adjustments in a particular order such that we always fit at least one of the envelopes exactly where the other one or two envelopes may be exceeded by some amount. We first enforce a fit to the intellectual disability impairment envelope, then epilepsy and, lastly, blindness. Thus, the intellectual disability envelope will always match exactly, whereas the epilepsy and blindness envelopes may occasionally be exceeded on a draw-by-draw basis.

## 5.5 Severity Distribution

Sequelae were defined in terms of severity for 199 causes at Level 4 of the hierarchy (Appendix Table 3). We generally followed the same approach for estimating the distribution of severity as in GBD 2015. For Zika, we included sequelae for those with symptomatic acute infection, a small proportion with Guillain-Barré syndrome and the number of neonates with congenital Zika as reported to Pan American Health Organization (PAHO). For sexual violence, we estimated concurrent physical injuries and the more immediate psychological outcomes following sexual violence. For the added causes that were split from broader cause categories, the differentiation between drug-sensitive and drug-resistant tuberculosis, the creation of other leukemia, alcoholic and other cardiomyopathy, and self-harm by firearm or other means each follow the same pattern of assigning sequelae as for their parent causes. In cases in which severity was related to a particular impairment, such as mild, moderate, and severe heart failure due to ischemic heart disease, the analysis was driven by impairment estimation methods. Severity levels for conditions such as chronic kidney disease and COPD were modelled using DisMod-MR 2.1, while we performed meta-analyses to estimate the allocation of severity for causes such as rheumatoid arthritis, dementia, and multiple sclerosis.

For many causes we had inadequate data on severity from surveys or the epidemiological literature. For those diseases, we made use of three population surveys: the US Medical Expenditure Panel Survey (MEPS) 2000–2014, the [US] National Epidemiological Survey on Alcohol and Related Conditions (NESARC) 2000–2001 and 2004–2005, and the Australian National Survey of Mental Health and Wellbeing of Adults (NSMHWB) 1997.<sup>20–22</sup> Each dataset contained individual-level measurements of functional health status using the SF-12 Health Survey as well as diagnostic information on the conditions affecting each individual.

In order to use the data collected using SF-12 for measuring the distribution of severity, the individual SF-12 summary scores were mapped to an equivalent disability weight. A convenience sample of respondents was asked to complete SF-12 for the hypothetical individual living in a health state described using a selection of 60 of the 235 health states with their lay descriptions from the GBD Disability Weights (DW) surveys, reflecting the full range of severity. Each of these health states has a measured disability weight associated with it on a zero to one scale. In total, we collected 1,980 usable responses. To deal with heterogeneity in responses, we excluded from the statistical analysis responses that were more than two median absolute deviations from the median for each health state. After correcting for outliers, the rank order correlation between SF-12 scores for the hypothetical individuals in each health state characterized by the lay description with the measured disability weight was -0.815. The health states served as random effect groups, such that the composite score would be equal to the intercept plus the random effect estimated for that health state, or

$$DW_i = \alpha + U_{health\ state}$$

The final relationship between SF-12 score and disability weight is shown below:

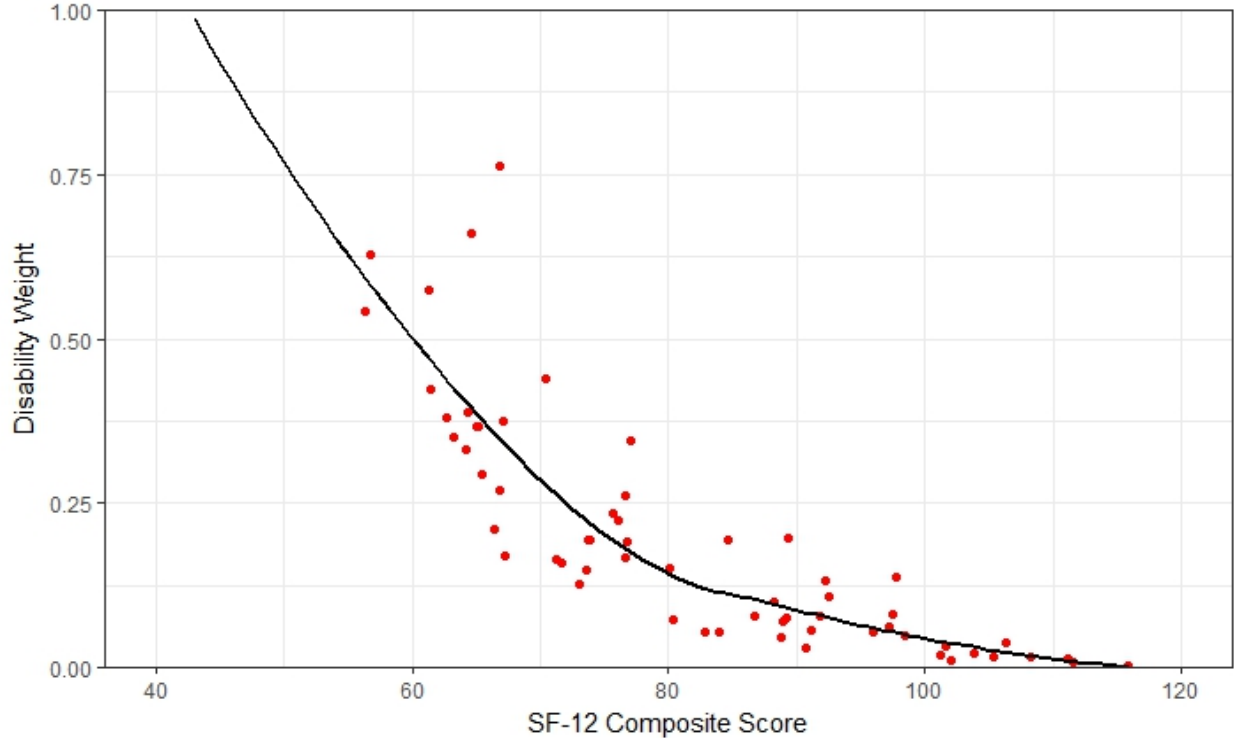

To generate a smooth mapping from SF-12 combined scores to the GBD disability weight space, we used LOESS regression on the random effects for each health state. Because disability weights are defined in the range from 0 to 1, we truncated the function at a combined SF-12 score of 116.36 (any combined score above this level was set to 0) and truncated the function at 42.7 so that any combined score less than that value was set to 1. All SF-12 survey data were thus transformed into disability weight space.

The second stage of the analysis was to build models predicting the transformed SF-12 scores as a function of the number of conditions suffered by each individual. First, variable selection was performed using LASSO regression to penalize the regression coefficients of highly correlated conditions. The tuning parameter,  $\lambda$ , controls the strength of the least-squares penalty. When  $\lambda=0$ , LASSO regression returns the same results as ordinary least-squares regression. Higher values of  $\lambda$  impose a stronger penalty and constrain a greater number of model parameters to 0. A 10-fold cross-validation was used to find the value of the  $\lambda$  that minimized the mean cross-validated error. This process resulted in a  $\lambda$  value of 0.0013 and eliminated 10 conditions from the analysis. Transformed SF-12 scores into the disability weight scale

for the remaining 190 conditions were then modeled for each measure  $m$  of each individual  $i$  over  $n$  total conditions in the survey, as follows:

$$\text{logit}(DW)_{im} = \beta_0 + \beta_1 \text{Condition}1_{im} + \dots + \beta_n \text{Condition } n_{im}$$

This equation effectively assumes that comorbid conditions act to change SF-12 scores in a multiplicative fashion rather than an additive fashion.

To estimate the comorbidity-corrected effect of each condition (i.e., in isolation) on total disability, we compared the predicted disability weight without the condition of interest (“counterfactual DW”) with the predicted disability weight including the condition of interest. Following the multiplicative comorbidity equation, the joint effect can be written:

$$\text{Condition specific } DW = 1 - \frac{1 - \text{predicted } DW_m}{1 - \text{counterfactual } DW_m}$$

The mean of this condition-specific effect over all observations is the population marginal effect of a condition.

Using the model above, we estimate a counterfactual disability weight – the total individual disability weight excluding the effect of the condition of interest. We compared the observed distribution of functional health status with this counterfactual distribution to determine the marginal effect of the condition of interest. In other words, we estimate the health state for each individual and for each condition as the cumulative individual weight minus the effects of all comorbid conditions.

$$\text{Health state } DW = 1 - \frac{1 - \text{individual cumulative } DW_m}{1 - \text{counterfactual } DW_m}$$

The estimation strategy for health state-specific severity distributions where there are multiple severity categories involved binning individuals’ weights into severity cutoffs (e.g., mild, moderate, and severe) for which disability weights were derived. These bins were defined using results from the GBD Disability Weights Studies<sup>23</sup> for conditions which had multiple health states defined. Cutoffs were taken as the midpoints between levels of health state and cases distributed into severity bins accordingly. Cases were



considered asymptomatic if the counterfactual weight was equal to or exceeded the individual cumulative weight.

## 5.6 Disability weights

To compute YLDs for a particular health outcome in a given population, the number of people living with that outcome is multiplied by a disability weight that represents the magnitude of health loss associated with the outcome. Disability weights are measured on a scale from 0 to 1, with 0 implying a state that is equivalent to full health and 1 a state equivalent to death.

Disability weights used in GBD studies prior to GBD 2010 have been criticized for the method used (person trade-off), the small elite panel of international public health experts who determined the weights and the lack of consistency over time as the GBD cause list expanded and additional disability weights from a study in the Netherlands<sup>24</sup> were added or others derived by ad-hoc methods.

### GBD 2010 Disability Weights Measurement Study

For GBD 2010, a primary data collection effort focused on measuring health loss rather than welfare loss using a standardized approach of simple comparison questions directed to the general public across diverse communities.

Multicountry household surveys were conducted between Oct 28, 2009 and June 23, 2010 in five countries (Bangladesh, Indonesia, Peru, Tanzania and the USA) selected to provide diversity across culture, language and socioeconomic status.

Personal face-to-face computer-assisted interviews were conducted for all household surveys with the exception of the survey in the USA which was conducted as computer-assisted telephone interviews. Households were randomly selected using a multistage stratified sampling design where the probability of selection was proportional to the population size. In all cases, samples were designed to be representative for a given geographical area with national representation in the case of the USA.

For every contacted household, an adult respondent aged 18 years or older was randomly selected by the survey program using the Kish approach. For face to face interviews, up to three visits were made to selected households to establish contact. When a respondent was identified, up to three return visits were made in order to do the survey at a time when the respondent was available. For the US telephone surveys, repeat calls were made up to seven times.

A web based survey was posted at a dedicated URL between July 26, 2010 and May 16, 2011. The survey was initially available in English with subsequent availability in Spanish and Mandarin. Recruitment of respondents occurred through several channels, such as news items and editorials in scientific journals, announcements at scientific meetings, postings on websites of institutions participating in the GBD, social networking and communication mobilization channels as well as direct contact with individuals and groups with known global health interests by tapping into the professional networks of the study

investigators and their colleagues. Participants in the web based survey were required to be aged 18 or older. Household surveys obtained oral informed consent from all participants; written informed consent was obtained from participants in the web survey. Ethical review board approval was obtained from each household survey site and at the University of Washington, Seattle, WA.

Standardized survey instruments were developed to obtain comparative assessments of the full array of disease and injury sequelae, parsimoniously captured in 220 unique health states. Lay descriptions of health states formed the basis for all comparisons. These descriptions used simple, non-clinical vocabulary that emphasized the major functional consequences and symptoms associated with each health state. Development of these descriptions involved an iterative process of detailed consultation with experts participating in the GBD 2010 study with the goal of both capturing the most relevant details of each health state while avoiding ambiguity and ensuring consistency. Where possible, health states were grounded in standard clinical classifications systems, for example, the Canadian Cardiovascular Society grading scale was referenced for descriptions of stages of angina,<sup>25</sup> while the New York Heart Association functional classification was referenced for severity of heart failure.<sup>26</sup> Pilot testing indicated that the lay descriptions in face-to-face interviews should not exceed 30 words.

A paired comparison question formed the basis of all surveys. The questions in the survey were framed with the following statement, “A person’s health may limit how well parts of his body or mind work. As a result, some people are not able to do all of the things in life that others may do, and some people are more severely limited than others. I am going to ask you a series of questions about different health problems. In each question, I will describe two different people...” Descriptions of two hypothetical people, each with a particular health state, were presented to respondents who were then asked which person they regarded as the healthier. Health pairs in all surveys were selected by a randomizing computer algorithm. In the five household surveys, paired comparisons were presented for a subset of 108 health states pertaining to chronic conditions. The framing of chronic and acute conditions is different as they were presented as causing life-long or temporary health loss. We chose to only field health states that could be framed as lasting a lifetime in the household surveys as we hypothesized that presenting differently framed comparisons would be difficult to convey in face-to-face interviews. In the web survey we considered this more feasible as respondents could read and refer to the framing of the question for each pair-wise comparison. All 220 health states were thus evaluated in the web survey.

In addition, the web survey included questions relating to population health and health programs specifically – such as “Imagine two different health programs. The first program prevented 1,000 people from getting an illness that causes rapid death. The second program prevented 2,000 people from getting an illness that is not fatal but causes lifelong health problems resulting in moderate to severe disability. Which program would you say produced the greater overall health benefits?” This information was used to anchor the results from the pair-wise comparisons on the 0–1 disability weight scale.

The GBD 2010 disability weights were critically dependent on the ways that outcomes were described to survey respondents. Descriptions for health states were designed to balance validity and parsimony and this necessarily meant that some details of different health states had to be omitted. As lay descriptions were developed collaboratively through individual expert groups organized around a particular set of health issues – some amount of variability in language and detail inevitably occurred. Criticisms and suggestions for improvement came from a number of commentators on the GBD 2010 disability weights measurement study.<sup>27–29</sup>

The GBD 2013 Study expanded the list of disease and injury causes and sequelae which were mapped to 235 unique health states. Additional data for the European Disability Weights Measurement Study were collected between September 23, 2013 and November 11, 2013 in Hungary, Italy, the Netherlands and Sweden. The initiation of these surveys was connected to a project sponsored by the European Centre for Disease Prevention and Control (the Burden of Communicable Diseases in Europe project).<sup>30</sup> The four selected countries were chosen to be representative of the four regions of Europe (east, south, middle, and north) in terms of age, sex and education of the respondents. Respondents were recruited from standing internet panels in each country on the basis of quota sampling with reference to age, sex and education in such a way as to maintain population representativeness of these characteristics. Eligible participants were aged 18–65 and were preselected in the case of the Netherlands, where age, sex and education of respondents were already known, or in the case of the other three countries, invited to participate via a web-link and then selected on the basis of their individual characteristics.

The protocol for the European disability weights measurement study followed the protocol that was developed and implemented in the GBD 2010 disability weights measurement study. Lay descriptions for some health states that lacked mention of an important symptom or for which consistency of wording across different levels of severity had been noted were reworded. The European disability weights measurement study included 255 health states, of which 183 were used in the analyses of GBD 2013. Those 183 consisted of 135 of the 220 health states that were included in the European disability weights measurement study with unmodified lay descriptions; 30 from GBD 2010 for which alternative lay descriptions were included. Disability weights were estimated for additional sequelae that were incorporated into GBD 2013 but had not been included in GBD 2010.

Finding high correlation in resulting disability weight values between the country surveys and the web survey, we analyzed the results of all surveys together. We ran probit regression analyses on the answers to the pair-wise comparison questions, with dummies for each health state with a value of 1 for the first state in a pair, –1 for the second of a pair being chosen, and 0 for all states other than the pair being considered. This method formalizes the intuition that if two health states in a pair produce similar health loss, the answers are likely to be evenly split; a pair of health states with very different health loss, will get many more responses favoring one over the other. The statistical methods infer the distances between values attached to different health states based on the frequencies of responses to the paired comparisons. A second analytic step is needed to anchor the resulting estimates onto the 0–1 disability weights scale. We anchored results from the probit regression analysis onto the 0–1 scale using population health equivalence data from the GBD 2010 web survey using a linear regression of the probit coefficients from the analysis of paired comparisons on the logit-transformed disability weight estimates

derived from interval regression of the population health equivalence responses. Using numerical integration, we then estimated mean values for disability weights on the natural 0–1 scale. Uncertainty was estimated by bootstrapping with 1000 samples.

A complete listing of the lay descriptions and values for the 235 health states used in GBD 2016 is provided in Appendix Table 5.

## 5.7 Comorbidity correction (COMO)

The final stage in the estimation of YLDs is a micro-simulation, which adjusts for comorbidity. We refer to this micro-simulation process as “COMO”. For GBD 2016, we estimated the co-occurrence of different diseases by simulating 40,000 individuals in each location-age-sex-year combination as exposed to the independent probability of having any of the sequelae included in GBD 2016 based on disease prevalence. We tested the contribution of dependent and independent comorbidity in the US MEPS data, and found that independent comorbidity was the dominant factor even though there are well-known examples of dependent comorbidity, i.e., clustering of conditions such as diabetes and stroke or anxiety and alcohol use disorders. Age was the main predictor of comorbidity such that age-specific microsimulations accommodated most of the required comorbidity correction.<sup>31</sup>

The two components necessary for the computation of YLDs, prevalence of each disease sequela and disability weights, are the two inputs into COMO. The prevalence values are primarily produced using DisMod-MR 2.1. The disability weights have been described above.

The micro-simulation, as performed for each age-sex-location-year, can best be represented as a four-step process. First, simulants are exposed to independent probabilities of having each sequela, where the probability is equal to the prevalence estimate. For each simulant, the probability of having a disease sequela is equal to the estimated prevalence from that draw from the uncertainty distribution. Each simulant is determined to have or not have the disease sequela based on a draw from a binomial distribution. From this simulation, simulants end up having from none to multiple disease sequelae. Second, the disability weight for each simulant is estimated based on the disease sequelae that they have acquired. The formula for the cumulative disability weight for a simulant is one minus the multiplicative sum of one minus each disability weight present:

$$\textit{Simulant } DW_l = 1 - \prod_{k=i}^j (1 - DW_k)$$

where the  $DW_k$  is the disability weight for the  $k^{\text{th}}$  disease sequela that the simulant  $l$  has acquired. Once the simulant disability weight is computed, the disability weight attributable to each sequela for the simulant is calculated using the following formula:

$$ADW_{lk} = \frac{DW_k}{\sum_{k=i}^j DW_k} * \textit{Simulant } DW_l$$

where  $ADW_{lk}$  is the attributable DW for disease sequela  $k$  in simulant  $l$ ;  $DW_k$  is the disability weight for disease sequela  $k$ , and simulant  $DW_l$  is the disability weight for simulant  $l$  from the combination of all sequelae that they have acquired. This formula apportions the overall simulant disability weight to each condition in proportion to the disability weight of each condition in isolation.

Finally, YLDs per capita in an age-sex-country-year are computed by taking the sum of the attributable disability weights for a disease sequela across simulants.

$$YLD\ Rate_k = \frac{\sum_{l=1}^n ADW_{lk}}{n}$$

The actual number of YLDs from disease sequela  $k$  in an age-sex-location-year is then computed as the YLD rate  $k$  times the appropriate age-sex- location-year population.

By repeating the simulation process for each age-sex-country-year 1,000 times, the uncertainty in the prevalence of each disease sequela and the disability weight is propagated into the final comorbidity corrected YLD results. We selected 40,000 simulants for each age-sex- location-year group on the basis of simulation testing, which has shown that results are stable for YLDs at this number of simulants even in the younger age groups when prevalence is relatively low. Mean results for YLDs which reflect 40 million simulants (40,000 simulants multiplied by 1,000 iterations to capture uncertainty) are very stable in each age-sex-location-year. For any given location-year-age-sex group, sequelae with prevalence of less than one in 20,000 were excluded from the microsimulation.

## 5.8 YLD Computation, Uncertainty & Residual YLDs

For GBD 2016, we computed YLDs by sequela as prevalence multiplied by the disability weight for the health state associated with that sequela. The uncertainty ranges reported around YLDs incorporates uncertainty in prevalence and uncertainty in the disability weight. To do this, we take the 1,000 samples of comorbidity-corrected YLDs and 1,000 samples of the disability weight to generate 1,000 samples of the YLD distribution. We assume no correlation in the uncertainty in prevalence and disability weights. The 95% uncertainty interval is reported as the 25<sup>th</sup> and 975<sup>th</sup> values of the distribution. Uncertainty intervals for YLDs at different points in time (1990, 1995, 2000, 2005, 2010, and 2016) for a given disease

or sequela are correlated because of the shared uncertainty in the disability weight. For this reason, changes in YLDs over time can be significant even if the uncertainty intervals of the two estimates of YLDs largely overlap as significance is determined by the uncertainty around the prevalence estimates.

## Residual YLDs

Despite expanding our list of causes and sequelae in successive GBD iterations, many diseases remain for which we do not explicitly estimate disease prevalence and YLDs. Less common diseases and their sequelae were included in 35 residual categories (Appendix Table 6). For 22 of these residual categories, epidemiological data on incidence or prevalence were available and so these were modelled accordingly. For 13 residual categories, epidemiological data on incidence and prevalence were not available but sufficient cause of death data allowed for cause of death estimates. For these residual categories, we estimated YLDs by multiplying the residual YLL estimates by the ratio of YLDs to YLL from the estimates level 3 causes in the same disease category that were explicitly modelled. This scaling was undertaken for each country-sex-year. This approach made the simplifying assumption that the residual diseases caused disability proportionate to the ratio of disability to mortality in explicitly modelled diseases. We did not include causes with large disability but no or little mortality in estimating these ratios. For example, we estimated the YLDs from other neurological disorders from the YLD to YLL ratios for dementia, multiple sclerosis, and Parkinson's disease, but did not include the YLDs from headaches and epilepsy in the ratio.

## 5.9 Socio-Demographic Index (SDI) analysis & Epidemiological Transition

### *a. Development of revised SDI indicator*

The Socio-demographic Index (SDI) is a composite indicator of development status constructed for GBD 2015 whose components are strongly correlated with health outcomes. It is the geometric mean of 0 to 1 indices of total fertility rate, mean education for those aged 15 and older, and lag distributed income per capita.

SDI was calculated using the Human Development Index (HDI) methodology, wherein an index value was determined for each of the covariate inputs (log LDI, mean educational attainment over age 15, and TFR). For GBD 2015 these indices were computed on the basis of a relative scale, in which the upper and lower bounds were established by the maximum and minimum observed values, respectively, for each input over the entire estimation period of 1980–2015.

Prompted by the observations that the scales (and by extension SDI) were sensitive to the addition of new subnational locations as GBD becomes more granular and to the length of the time period over which SDI

is computed, for GBD 2016 we implemented fixed scales in determining individual indices. Thus, an index score of 0 now represents the minimum level of each covariate input past which selected health outcomes can get no worse. An index score of 1 represents the maximum level of each covariate input past which selected health outcomes cease to improve. As a composite, a location with an SDI of 0 would have a theoretical minimum level of development relevant to these health outcomes, while a location with an SDI of 1 would have a theoretical maximum level of development relevant to these health outcomes.

We selected the minima and maxima of the scales by examining the relationships each of the inputs had with life expectancy at birth and under-5 mortality and identifying points of limiting returns at both high and low values, if they occurred prior to theoretical limits (eg, a TFR of 0). The final scales are summarised in the table below.

| <b>Input</b>                                      | <b>Lower bound</b>                  | <b>Upper bound</b>         |
|---------------------------------------------------|-------------------------------------|----------------------------|
| TFR                                               | 1.5 <sup>a</sup>                    | 8                          |
| LDI per capita                                    | 250 USD (5.52 log USD) <sup>b</sup> | 60,000 USD (11.00 log USD) |
| Mean educational attainment for ages 15 and older | 0 years                             | 17 years                   |

<sup>a</sup> The low point of limiting returns for TFR was identified at 1 during GBD 2015; however, incorporating feedback with regard to accounting for a pattern of TFR rebound in highly developed countries, we instead set the lower limit of TFR at 1.5.

<sup>b</sup> The minimum for the LDI scale was originally set at the theoretical limit of 0 USD, as we did not observe an asymptotic relationship between log(LDI) and  $E_0$  or 5q0 at lower values of log(LDI). Empirically, however, we also did not observe an LDI below 350 USD (5.86 log USD) for the estimation period 1970–2016. In log-space, this meant that approximately half of our scale was not being utilised, compressing the observed variation in LDI and diminishing its meaningful contribution to SDI. Accordingly, we set the lower limit on LDI to 250 USD (5.52 log USD) to ensure we were fully utilising the range of the scale to capture its variation across space and time, as is the case with the other two inputs.

Using the limits on the scales described above, we computed the index scores underlying SDI analogously to GBD 2015 as follows:

$$I_{cly} = \frac{(C_{ly} - C_{low})}{(C_{high} - C_{low})}$$

Where  $I_{cly}$  – the index for covariate  $C$ , location  $l$ , and year  $y$  – is equal to the difference between the value of that covariate in that location-year and the lower bound of the covariate divided by the difference between the upper and lower bounds for that covariate. If the values of input covariates fell outside the upper or lower bounds (eg, LDI per capita greater than 60,000 USD), they were mapped to the respective upper or lower bounds. We also note that the index value for TFR was computed as  $1 - I_{TFRly}$ , as lower TFRs correspond to higher levels of development, and thus higher index scores. For GBD 2016 we expanded the computation of SDI to 755 national and subnational locations spanning the time period 1970–2016.

The composite Socio-demographic Index is the geometric mean of these three indices for a given location-year. The cutoff values used to determine quintiles for analysis were then computed using country-level estimates of SDI for the year 2016, excluding countries with populations less than 1 million.

### Example calculation

Below we present the calculation of SDI for Mexico in the year 2010:

$$TFR = 2.43; \text{ Mean educ yrs pc} = 9.23; \ln LDI = 9.58$$

$$I_{TFR} = 1 - \frac{2.43 - 1.5}{8 - 1.5} = .855$$

$$I_{Educ} = \frac{9.23 - 0}{17 - 0} = .543$$

$$I_{\ln LDI} = \frac{9.58 - 5.52}{11.00 - 5.52} = .741$$

$$SDI = \sqrt[3]{I_{TFR} * I_{Educ} * I_{\ln LDI}} = \sqrt[3]{.855 * .543 * .741} = .701$$

### b. Age-sex-specific relationships between SDI and YLD rates

In order to evaluate the relationship between SDI and morbidity, we fit a Gaussian process regression using a linear prior to the mean function within a stochastic partial differential equation (SPDE) framework.

We first assume the following:

$$\ln(Y_{iasc}) \sim N(\mu_i, \sigma^2)$$

Where  $Y_{iasc}$  is the cause-specific YLD rate for a given level of SDI ( $i$ ), age group ( $a$ ), sex ( $s$ ), and cause ( $c$ ).

We then specify a linear prior to the mean  $\mu_i$ :

$$\mu_i = \alpha + \beta(SDI) + z_i$$

Where

$$z_i \sim GP(0, \Sigma_M)$$



*GP* refers to a Gaussian process, and  $\Sigma_M$  refers to the Matern covariance function.

For causes where the relationship between SDI and YLD rates was markedly non-linear (e.g., many neglected tropical diseases), we instead specified a continuous linear piecewise prior to the mean with either one or two knots depending on the nature of the distinct changes in direction in the data.

Using SPDE, we specified additional priors on the range, variance, and precision of the mean function, as well as selected the number of underlying bases. These hyperparameters were chosen empirically and were identical for all age-sex-cause combinations. Values for the selected hyperparameters are displayed in the table below.

| Hyperparameter  | Value                       |
|-----------------|-----------------------------|
| Range           | 0.2                         |
| Variance        | 1                           |
| Precision       | $1 \times 10^{10}$          |
| Number of bases | 2 (mesh points at 0.3, 0.7) |

Regressions were run separately by age-sex-cause, using observed cause-specific YLD rates from all years 1990-2016 to produce predictions per level of SDI from 0 to 1 in increments of .005. We fit models on observations from all countries estimated in GBD and included state and province level estimates in lieu of national estimates for Brazil, China, and India due to their large populations (> 200 million) and small number of state-level units modelled in GBD (BRA – 27, IND – 31, CHN – 33) relative to population. Though the United States and Indonesia also fall under the designation of large-population (> 200 million), we fit models on national-level observations instead of state/province-level observations for these two countries as a result of the undue influence from the relatively large number of state-level units modelled in GBD relative to population (USA – 51, IDN – 34). Country and region dummy variables used in GBD 2015 were no longer included in this analysis. All models were fit using the INLA package in R.

Due to the more reliable estimation at more aggregate levels of cause specificity, we imposed a top-down hierarchical scaling scheme, in which the Level 1 causes were scaled to the predictions for all-cause morbidity, then Level 2 causes were scaled to their scaled Level 1 parents, and so on.

Having a complete set of age specific YLD rates, we were then able to produce a full set of age-standardized rates for every SDI level. In order to produce other age-aggregates of our results, we used the same modeling framework as above. In this case, however, we regarded the logit of the share of population in each age group as the dependent variable to estimate a smoothed relationship between

population age-structure and SDI. Predictions for each age group at each level of SDI were rescaled to sum to 100%.

## Section 6. Risk factor estimation

### Overview

The comparative risk assessment (CRA) conceptual framework was developed by Murray and Lopez,<sup>1</sup> who established a causal web of hierarchically organised risks or causes that contribute to health outcomes (Appendix Figure 1), which allows for quantification of risks or causes at any Level in the framework. In GBD 2016, as in previous iterations of the GBD study, we evaluated a set of behavioural, environmental and occupational, and metabolic risks, where risk-outcome pairs were included based on evidence rules (see appendix pp 10-11). These risks were organised in four hierarchical Levels, where Level 1 represents the overarching categories (behavioural, environmental and occupational, and metabolic) nested within Level 1 risks; Level 2 contains both single risks and risk clusters (such as child and maternal malnutrition); Level 3 contains the disaggregated single risks from within Level 2 risk clusters (such as low birthweight and prematurity); and Level 4 details risks with the most granular disaggregation, such as for specific occupational carcinogens, the subcomponents of childhood undernutrition (stunting, wasting, underweight), and suboptimal breastfeeding (discontinued and non-exclusive breastfeeding). At each level of risk, we evaluated whether risk combinations were additive, multiplicative, or shared common pathways for intervention. This approach allows the quantification of the proportion of risk-attributable burden shared with another risk or combination of risks and the measurement of potential overlaps between behavioural, environmental and occupational, and metabolic risks. To date in the GBD we have not quantified the contribution of other classes of risk factors illustrated in Appendix Table 4. We do provide some insights into the potential magnitude of distal social, cultural, and economic factors through an analysis of the relationship between risk exposures and development measured using the Socio-demographic Index (SDI) (appendix pp 34-36)

Two types of risk assessments are possible within the CRA framework: attributable burden and avoidable burden. Attributable burden is the reduction in current disease burden that would have been possible if past population exposure had shifted to an alternative or counterfactual distribution of risk exposure. Avoidable burden is the potential reduction in future disease burden that could be achieved by changing the current distribution of exposure to a counterfactual distribution of exposure. Murray and Lopez identified four types of counterfactual exposure distributions: (1) theoretical minimum risk; (2) plausible minimum risk; (3) feasible minimum risk; and (4) cost-effective minimum risk.<sup>2</sup> The theoretical minimum risk level (TMREL) is the level of risk exposure that minimises risk at the population level, or the level of risk that captures the maximum attributable burden. Other possible forms of risk quantification include plausible minimum risk – which reflects the distribution of risk that is conceivably possible and would minimise population-level risk if achieved – while feasible minimum risk describes the lowest risk distribution that has been attained within a population, and the cost-effective minimum risk is the lowest risk distribution for a population that can be attained in a cost-effective manner. Because no robust set of forecasts for all components of GBD is available, in this study we focus on quantifying attributable burden using the theoretical minimum risk counterfactual distribution. Appendix Table 4 shows the eight possible types of risk quantification within the CRA framework, with the hatched box representing the type of CRA currently undertaken by the GBD study. As per the definition of avoidable burden, risk reversibility would be incorporated into this type of assessment, as it would involve reducing risk to the counterfactual for the index year, given a history of past risk exposure. Given the focus in this study on attributable burden, risk reversibility is not a criteria used in estimation here.

In general, this analysis follows the CRA methods used in GBD 2015.<sup>3</sup> The methods described here provide a high-level overview of the analytical logic with a focus on areas of notable change from the methods employed in GBD 2015. Here we aim to provide sufficient detail on the methodology and overall structure of the estimation process. This study complies with the GATHER recommendations proposed by the World Health Organization (WHO) and others, which include recommendations on documentation of data sources, estimation methods, and statistical analysis (Appendix Table 5).<sup>4</sup>

## Step 1. Effect size estimation

### 1a. Collate relative risk data

#### *Criteria for inclusion of risk-outcome pairs*

In this study, as in GBD 2015, we have included risk-outcome pairs that we have assessed as meeting the World Cancer Research Fund (WCRF) grades of convincing or probable evidence.<sup>5</sup> In this framework, convincing evidence consists of biologically plausible associations between exposure and disease established from multiple epidemiological studies in different populations. Evidentiary studies must be substantial, include prospective observational studies, and where relevant, randomised controlled trials (RCTs) of sufficient size, duration, and quality, and showing consistent effects. Probable evidence is similarly based on epidemiological studies with consistent associations between exposure and disease, but for which shortcomings in the evidence exist, such as insufficient trials (or prospective observational studies) available.

#### *The World Cancer Research Fund grading system*

##### **Convincing evidence**

Evidence based on epidemiological studies showing consistent associations between exposure and disease, with little or no evidence to the contrary. The available evidence is based on a substantial number of studies including prospective observational studies and where relevant, randomized controlled trials of sufficient size, duration, and quality showing consistent effects. The association should be biologically plausible.

##### **Probable evidence**

Evidence based on epidemiological studies showing fairly consistent associations between exposure and disease, but for which there are perceived shortcomings in the available evidence or some evidence to the contrary, which precludes a more definite judgment. Shortcomings in the evidence may be any of the following: insufficient duration of trials (or studies); insufficient trials (or studies) available; inadequate sample sizes; or incomplete follow-up. Laboratory evidence is usually supportive. The association should be biologically plausible.

##### **Possible evidence**

Evidence based mainly on findings from case-control and cross-sectional studies. Insufficient randomized controlled trials, observational studies, or non-randomized controlled trials are available. Evidence based on non-epidemiological studies, such as clinical and laboratory investigations, is supportive. More trials are needed to support the tentative associations, which should be biologically plausible.

##### **Insufficient evidence**

Evidence based on findings of a few studies which are suggestive, but insufficient to establish an association between exposure and disease. Little or no evidence is available from randomized controlled trials. More well-designed research is needed to support the tentative association.

##### **Causal criteria**

As in GBD 2015, to be more objective, consistent, and transparent in our evaluation of the causal relationship, we summarized epidemiologic evidence supporting causality for each risk-outcome pair. For each pair, we collected data on the following domains:

| <i>Domains</i>                                        | <i>Description</i>                                                                                                       |
|-------------------------------------------------------|--------------------------------------------------------------------------------------------------------------------------|
| RCTs of disease endpoint                              | Number of independent RCTs evaluating the effect of the risk on the disease endpoint                                     |
|                                                       | Percent of independent RCTs showing significant effect in the opposite direction                                         |
|                                                       | Percent of independent RCTs showing no effect                                                                            |
| Prospective observational studies of disease endpoint | Number of independent prospective observational studies evaluating the association of the risk with the disease endpoint |
|                                                       | Percent of independent prospective observational studies with significant association in the opposite direction          |
| Strength                                              | Lower Limit of RR in observational studies > 1.5 (Yes/No)                                                                |
| Dose response                                         | Evidence of the dose-response relationship between the risk and the outcome (Yes/No)                                     |
| Biologic plausibility                                 | Potential biologic mechanism that could explain the effect of the risk on the disease endpoint (Yes/No)                  |
| Analogy                                               | Evidence on the relationship between the risk factor and a disease endpoint from the same category (Yes/No)              |

In GBD 2016, for risk-outcome pairs with less than 5 prospective studies, we summarized evidence from case-control studies as well including (a) the number of independent case-control studies evaluating the association of the risk with the disease endpoint and (b) percent of independent case control studies with significant association in the opposite direction.

---

### *Fitting a distribution to exposure data*

The most informative data describing the distribution of risk factors within a population come from individual-level data; additional sources of data include reported means and variances. In cases when a risk factor also defines a disease, such as haemoglobin level and anaemia, the prevalence of disease is also frequently reported. To model the distribution of any particular risk factor, we seek a family of probability density functions (PDFs), a fitting method, and a model selection criterion. To make use of the most data describing most populations, we used the method of moments (MoM); the first two empirical moments from a population, the mean and variance, were used to determine the PDF describing the distribution of risk within any population, where exceptions to this rule are justified by context. We used the Kolmogorov-Smirnov test to measure the goodness of fit (GoF), but in some cases, the GoF was based on the prediction error for the prevalence of disease.

We used an ensemble technique in which a model selection algorithm is used to choose the best model for each continuous risk factor.<sup>6</sup> We drew the initial set of candidate models from commonly used PDF families, ranging from right skewed to left skewed distributions. We fitted each PDF candidate family to each dataset using the MoM, and used the Kolmogorov-Smirnov test<sup>7</sup> as the measure of GoF. Preliminary analysis showed that the GoF ranking of PDF families varied across datasets for any particular risk factor and that combining the predictions of differently fitted PDF families could dramatically improve the GoF for each dataset. Therefore, we developed a new model for prediction

using the ensemble of candidate models which is a weighted linear combination of all candidate models,  $\{f\}$ , where a set of weights  $\{w\}$  is chosen such that  $\sum_i w_i = 1$ , and the values of the weights were determined by a second GoF criterion with its own validation process. For each risk, we pooled all available microdata and performed Nelder-Mead numeric optimization across demographics subsets of data to derive a set of distribution specific weights such that the Kolmogorov–Smirnov (KS) statistic is minimized. The details can be summarised by 1) the summary statistics for each dataset; 2) a table showing the Kolmogorov-Smirnov statistic for each candidate model and URD; and 3) the weights defining the final ensemble model for each dataset.

## **1b. Determine relative risks**

### *Effect size estimation*

The relative risk by level of exposure, or by cause, for mortality or morbidity can be found in published and unpublished primary studies or in secondary studies that summarize relative risks. In Step 1a of the analytical process (Appendix Figure 2), we collated information from randomized controlled trials, cohort, pooled cohort, and case-control studies, and in Step 1b, used these data to determine the relative risk for the risk-outcome pairs included in GBD 2016. For most risks, data from pooled cohorts, or meta-analyses of cohorts, were used; in the case of the risk of cataracts from household air pollution cohort data were not available, and instead we used case-control data. We estimated relative risks of mortality and morbidity for 65 risk factors for which we determined attributable burden using relative risk and exposure. We incorporated relative risks from studies that controlled for confounding but not for factors along the causal pathway between exposure and outcome. For risk-outcome pairs with evidence available for only one of mortality or morbidity, we generally assumed that the estimated relative risks applied equally to both. Given evidence of statistically different relative risks for mortality and morbidity, we incorporated different relative risks for each. We did not find that relative risks were consistently higher or lower for mortality compared with morbidity. Details and citation information for the data sources used for relative risks are provided in searchable form through a new web-tool (<http://ghdx.healthdata.org/>). Available data sources for determining relative risks varied across risks. Details on how relative risks were calculated for each risk can be found in Appendix Section 3.

For all outcomes related to unsafe sex, the relative risk and exposure framework was not used to estimate attributable burden. For unsafe sex and HIV, we used a direct attribution approach to address the lack of data on unsafe sexual practices in most populations. The proportion of HIV attributable to unsafe sex was modelled directly using DisMod-MR 2.1 from data on the fraction of cases identified as being through sexual transmission, intravenous drug use, or blood transfusion.

For risks estimated from a continuous exposure distribution where the effect size was reported by categories in pooled or meta-analysis studies, we converted those categories to relative risk per unit increase in exposure. This implies a linear increase in the log of the relative risk and exposure; various studies have suggested this is a reasonable approximation of the dose-response curve for many risks. An example of this is high systolic blood pressure, where data from the Prospective Cohort Study (PSC) and the Asia-Pacific Cohort Studies Collaboration (APCSC) were well-described by a linear increase in the logarithm of the relative risk by a 10-unit increase in high systolic blood pressure. This approximately log-linear relationship suggests that the proportional difference in the age-specific risk of stroke death associated with a given absolute difference in exposure is about the same at all levels of risk. Many meta-analyses convert relative risks to per unit increase for convenience, particularly when studies

choose different categories that could not otherwise be compared. The log-linear approximation appears plausible<sup>8</sup> even where there is limited consensus on the appropriate TMREL. Where there were insufficient samples in the primary studies at high levels of exposure to inform the shape of the tail of the distribution, we applied a cap to the maximum relative risk using the midpoint of the last category for which a relative risk was reported.

## Step 2. Exposure estimation

### 2a. Collate exposure data

#### *Systematic reviews*

For GBD 2016, we conducted systematic literature reviews for 23 risks. For other risk factors, only a small fraction of the existing data appears in the published literature and other sources predominate such as survey data and satellite data. Data were systematically screened from household surveys archived in the Global Health Data Exchange ([ghdx.healthdata.org](http://ghdx.healthdata.org)), including Demographic and Health Surveys, Multiple Indicator Cluster Surveys, Living Standards Measurement Surveys, and Reproductive Health Surveys. Other national health surveys were identified based on survey series that had yielded usable data for past rounds of GBD, sources suggested to us by in-country collaborators, and surveys identified in major multinational survey data catalogs, such as the International Household Survey Network and the WHO Central Data Catalog, as well as through country Ministry of Health and Central Statistical Office websites. Citations for all data sources used for risk factor estimation in GBD 2016 are provided in searchable form through a web-tool (<http://ghdx.healthdata.org/>). A description of the search terms employed for risk-specific systematic reviews are detailed by cause in Appendix Section 3.

Information on systematic reviews were managed using Research Electronic Data Capture (REDCap) electronic data capture tools hosted at the University of Washington.<sup>9</sup> REDCap is a secure, web-based application designed to support data capture for research studies, providing 1) an intuitive interface for validated data entry; 2) audit trails for tracking data manipulation and export procedures; 3) automated export procedures for seamless data downloads to common statistical packages; and 4) procedures for importing data from external sources

#### *Search terms*

Search terms for updates of systematic reviews for GBD 2016 are shown by risk in Appendix Section 3.

#### *Survey data preparation*

For GBD 2016, survey data constitutes a substantial part of the underlying data used in the estimation process. During extraction, we concentrate on demographic variables (such as location, gender, age), survey design variables (such as sampling strategy and sampling weights), and the variables used to define the population estimate (such a prevalence or a proportion) and a measure of uncertainty (standard error, confidence interval or sample size and number of cases).

### 2b. Adjust exposure data

A number of adjustments were applied to extracted exposure sources in order to make the data more consistent and suitable for modeling. Commonly applied adjustments included age-sex splitting, adding study-level covariates, and bias correction. Age-sex splitting was applied to literature data reported by age or sex but not by age and sex assuring that the total number of cases remained as reported. If a source did not report sample size by age or sex, we applied the age-sex distribution of the population for the same location and year to the reported total sample size. We relied on the metaregression

component of DisMod-MR 2.1 for most of the bias correction of data for variations in study attributes such as case definitions and measurement method. DisMod-MR 2.1 calculates a single adjustment that is applied regardless of age, sex, or location. If enough data were available to differentiate these adjustments by age, sex, or location, or if detailed survey data were available to make more precise adjustments between different thresholds on a biochemical measure, we applied bias corrections to the data before entry into DisMod-MR 2.1.

## **2c. Estimate exposure**

### *Mean exposure estimation*

In Step 2a of the estimation process, we used systematic literature reviews to identify risk factor exposure studies published or identified since GBD 2015 and combined these with existing data from household and health examination surveys, census, morbidity, or satellite imagery and ground sensor data (used for PM2.5 estimation). Certain risks, such as diet and alcohol consumption, also incorporated administrative record systems. Data sources used in estimating risk factor exposure can be accessed through the data source tool at <http://ghdx.healthdata.org/>.

Once data were collected and compiled, step 2b of the analytical flowchart describes the adjustments applied, where necessary, to correct for bias. Examples of these adjustments include: use of urban studies for lead; crosswalks between different measurements, methods, and definitions, such as for self-report of obesity and glycated hemoglobin (HbA1C) for diabetes; and age-sex splitting of data, such as for fasting plasma glucose, cholesterol, and systolic blood pressure that may be reported from broad age-groups.

For the GBD, we developed two modeling approaches, a Bayesian meta-regression model (DisMod-MR 2.1) and a spatiotemporal Gaussian process regression model (ST-GPR), to pool data from different sources, control and adjust for bias in data, and incorporate other types of information such as country-level covariates. DisMod-MR 2.1 and ST-GPR are mixed effect models that borrow information across age, time, and locations to synthesise multiple data sources into unified estimates of levels and trends. A detailed description of the likelihood used for estimation, and a full description of improvements made for DisMod-MR 2.1, are detailed by Vos and colleagues<sup>10</sup> with additional detail in the appendix to that paper. The ST-GPR model has three main hyper-parameters that control for smoothing across time, age, and location. Values for these hyper-parameters were selected based on cross-validation. Cross-validation tests were conducted for different combinations of the hyper-parameters. In each test, 30% of the data were held out and the performance of each combination of hyper-parameters evaluated on the held out data. For each hyper-parameter combination, 25 cross-validation tests were conducted. The performance of each model in predicting the withheld 30% of the data was evaluated using a combined measure based on root mean square error (RMSE) and uncertainty interval coverage. A detailed description of the ST-GPR process regression can be found on appendix pp 17-21.

The main difference between these methods is their power to include unstructured types of data by sex and age group and in their degree of flexibility. Step 2c in Appendix Figure 2 outlines the use of DisMod-MR 2.1 for 23 risk factors where data were available by different age intervals or mixed sex groups; DisMod-MR 2.1 is the preferred tool in these cases because of its ability to integrate over age and adjust for different exposure definitions in the data; however, the use of Bayesian Markov Chain Monte Carlo (MCMC) simulations with large volumes of data renders the analysis computationally intensive and



reduces the number of iterations that are possible. If large volumes of standard age-group data are available – as is generally the case for metabolic risks – using ST-GPR becomes the preferred approach.

In some cases, we adapted our methods of modeling exposure to risks where necessary to account for complexities in the risk-outcome relationship or the need for particular handling of data, for example, dietary risks and ambient air pollution (see Section 3 for more detail). A complete list of risks and the analytical method used is reported in Appendix Table 3. Additional details for adjustments or adaptations to particular risk models are located in Appendix Section 3.

### *DisMod-MR 2.1 Estimation*

#### **DisMod-MR 2.1 description**

Until GBD 2010, nonfatal estimates in burden of disease assessments were based on a single data source on prevalence, incidence, remission or a mortality risk selected by the researcher as most relevant to a particular location and time. For GBD 2010, we set a more ambitious goal: to evaluate all available information on a disease that passes a minimum quality standard. That required a different analytical tool that would be able to pool disparate information presented in varying age groupings and from data sources using different methods. The DisMod-MR 1.0 tool used in GBD 2010 evaluated and pooled all available data, adjusted data for systematic bias associated with methods that varied from the reference and produced estimates by world regions with uncertainty intervals using Bayesian statistical methods. For GBD 2013, the improved DisMod-MR 2.0 had increased computational speed allowing computations that were consistent between all disease parameters at the country rather than region Level. The hundred-fold increase in speed of DisMod-MR 2.0 was partly due to a more efficient rewrite of the code in C++ but also by changing to a model specification using log rates rather than a negative binomial model used in DisMod-MR 1.0. In cross-validation tests, the log rates specification worked as well or better than the negative binomial specification.<sup>11</sup> For GBD 2015, we rewrote the ‘wrapper’ code that organizes the flow of data and settings at each level of the analytical cascade. The sequence of estimation occurs at five Levels: global, super-region, region, country and, where applicable, subnational location. The super-region priors are generated at the global Level with mixed-effects, nonlinear regression using all available data; the super-region fit, in turn, informs the region fit, and so on down the cascade. The wrapper gives analysts the choice to branch the cascade in terms of time and sex at different levels depending on data density. The default used in most models is to branch by sex after the global fit but to retain all years of data until the lowest Level in the cascade. Appendix Figure 3 summarizes the DisMod-MR process.

In updating the ‘wrapper,’ we consolidated the code base into a single language, Python, to make the code more transparent and efficient and to better deal with subnational estimation. The computational engine is limited to three levels of random effects; we differentiate estimates at the super-region, region and country Level. In GBD 2013, the subnational units of China, the UK and Mexico were treated as ‘countries’ such that a random effect was estimated for every location with contributing data. However, the lack of a hierarchy between country and subnational units meant that the fit to country data contributed as much to the estimation of a subnational unit as the fits for all other countries in the region. We found inconsistency between the country fit and the aggregation of subnational estimates when the country’s epidemiology varied from the average of the region. Adding an additional level of random effects required a prohibitively comprehensive rewrite of the underlying DisMod-MR engine. Instead, we added a fifth layer to the cascade, with subnational estimation informed by the country fit

and country covariates, plus an adjustment based on the average of the residuals between the subnational location's available data and its prior. This mimicked the impact of a random effect on estimates between subnationals.

In GBD 2015, we also improved how country covariates differentiate nonfatal estimates for diseases with sparse data. The coefficients for country covariates are re-estimated at each Level of the cascade. For a given location, country coefficients are calculated using both data and prior information available for that location. In the absence of data, the coefficient of its parent location is used, in order to utilize the predictive power of our covariates in data sparse situations.

For GBD 2016, the computational engine (DisMod-MR 2.1) remained substantively unchanged from GBD 2015. We changed the prediction year set to generate fits for the years 1990, 1995, 2000, 2005, 2010, and 2016. We updated the age prediction sets to include age groups 80-84, 85-89, 90-94, and 95+, to comply with changes across all functional areas of the GBD. We also expanded the set of locations where subnational units are modeled; the set now includes: Brazil, China, England, India, Indonesia, Japan, Kenya, Mexico, Saudi Arabia, South Africa, Sweden, and the United States.

The flowchart for the DisMod-MR 2.1 process can be found in Appendix Figure 3.

### DisMod-MR 2.1 likelihood estimation

Analysts have the choice of using a Gaussian, log-Gaussian, Laplace or Log-Laplace likelihood function in DisMod-MR 2.1. The default log-Gaussian equation for the data likelihood is:

$$-\log[p(y_j|\Phi)] = \log(\sqrt{2\pi}) + \log(\delta_j + s_j) + \frac{1}{2} \left( \frac{\log(a_j + \eta_j) - \log(m_j + \eta_j)}{\delta_j + s_j} \right)^2$$

where,  $y_j$  is a 'measurement value' (i.e., data point);  $\Phi$  denotes all model random variables;  $\eta_j$  is the offset value, eta, for a particular 'integrand' (prevalence, incidence, remission, excess mortality rate, with-condition mortality rate, cause-specific mortality rate, relative risk or standardized mortality ratio) and  $a_j$  is the adjusted measurement for data point  $j$ , defined by:

$$a_j = e^{(-u_j - c_j)} y_j$$

where  $u_j$  is the total 'area effect' (i.e., the sum of the random effects at three Levels of the cascade: super-region, region and country) and  $c_j$  is the total covariate effect (i.e., the mean combined fixed effects for sex, study level and country level covariates), defined by:

$$c_j = \sum_{k=0}^{K[I(j)]-1} \beta_{I(j),k} \hat{X}_{k,j}$$

with standard deviation

$$s_j = \sum_{l=0}^{L[I(j)]-1} \zeta_{I(j),l} \hat{Z}_{k,j}$$

where  $k$  denotes the mean value of each data point in relation to a covariate (also called x-covariate);  $l(j)$  denotes a data point for a particular integrand,  $j$ ;  $\beta_{l(j),k}$  is the multiplier of the  $k^{\text{th}}$  x-covariate for the  $i^{\text{th}}$  integrand;  $\hat{X}_{k,j}$  is the covariate value corresponding to the data point  $j$  for covariate  $k$ ;  $l$  denotes the standard deviation of each data point in relation to a covariate (also called z-covariate);  $\zeta_{l(j),k}$  is the multiplier of the  $l^{\text{th}}$  z-covariate for the  $i^{\text{th}}$  integrand; and  $\delta_j$  is the standard deviation for adjusted measurement  $j$ , defined by:

$$\delta_j = \log[y_j + e^{(-u_j - c_j)}\eta_j + c_j] - \log[y_j + e^{(-u_j - c_j)}\eta_j]$$

Where  $m_j$  denotes the model for the  $j^{\text{th}}$  measurement, not counting effects or measurement noise and defined by:

$$m_j = \frac{1}{B(j) - A(j)} \int_{A(j)}^{B(j)} I_j(a) da$$

where  $A(j)$  is the lower bound of the age range for a data point;  $B(j)$  is the upper bound of the age range for a data point; and  $I_j$  denotes the function of age corresponding to the integrand for data point  $j$ .

#### *Spatiotemporal Gaussian process regression*

Spatiotemporal Gaussian process regression (ST-GPR) has been used for risk factors where the data density is sufficient to estimate a very flexible time trend. The flowchart showing the analytic steps can be found in Appendix Figure 4. The approach is a stochastic modeling technique that is designed to detect signals amidst noisy data. It also serves as a powerful tool for interpolating non-linear trends.<sup>12,13</sup> Unlike classical linear models that assume that the trend underlying data follows a definitive functional form, GPR assumes that the specific trend of interest follows a Gaussian Process, which is defined by a mean function  $m(\cdot)$  and a covariance function  $Cov(\cdot)$ . For example, let  $p_{c,a,s,t}$  be the exposure, in normal, log, or logit space, observed in country  $c$ , for age group  $a$ , and sex  $s$  at time  $t$ :

$$(p_{c,a,s,t}) = g_{c,a,s}(t) + \epsilon_{c,a,s,t}$$

where

$$\epsilon_{c,a,s,t} \sim Normal(0, \sigma_p^2),$$

$$g_{c,a,s}(t) \sim GP\left(m_{c,a,s}(t), Cov\left(g_{c,a,s}(t)\right)\right).$$

The derivation of the mean and covariance functions,  $m_{c,a,s}(t)$  and  $Cov\left(g_{c,a,s}(t)\right)$ , along with a more detailed description of the error variance ( $\sigma_p^2$ ), is described below.

#### *Estimating mean functions*

We estimated mean functions using a two-step approach. To be more specific,  $m_{c,a,s}(t)$  can be expressed, depending on the exposure transformation, as:

$$\log(p_{c,a,s}(t)) = X_{c,a,s}\beta + h(r_{c,a,s,t})$$

$$\text{logit}(p_{c,a,s}(t)) = X_{c,a,s}\beta + h(r_{c,a,s,t})$$

$$p_{c,a,s}(t) = X_{c,a,s}\beta + h(r_{c,a,s,t})$$

where  $X\beta$  is the summation of the components of linear regression, including the intercept and the product of covariates with their corresponding fixed effect coefficients. Some models were run as hierarchical mixed-effects linear regressions, with random effects on the levels of the geographic hierarchy. For most mixed-effects models, random effects were only used in the fit, not in the prediction. The second part of the equation,  $h(r_{c,a,s,t})$ , is a smoothing function for the residuals,  $r_{c,a,s,t}$ , derived from the linear model.<sup>3</sup> Descriptions of exposure transformations and which covariates were used in linear models can be found in Section 3 describing the risk-specific estimation approaches.

While the linear component captures the general trend in exposures over time, much of the data variability may still not be adequately accounted for. To address this, we fit a locally weighted polynomial regression (LOESS) function  $h(r_{c,a,s,t})$  to systematically estimate this residual variability by borrowing strength across time, age, and space patterns (the spatiotemporal component of ST-GPR). The time adjustment parameter, defined by  $\lambda$ , aims to borrow strength from neighboring time points (i.e. the exposure in this year is highly correlated with exposure in the previous year but less so further back in time). The age adjustment parameter, defined by  $\omega$ , borrows strength from data in neighboring age groups. The space adjustment parameter, defined by  $\xi$ , aims to borrow strength across the hierarchy of geographical locations.

Let  $w_{c,a,s,t}$  be the final weight assigned to observation  $r_{c,a,s,t}$  with reference to a focal observation  $r_{c_0,a_0,s_0,t_0}$ . We first generated a preliminary weight  $w'_{c,a,s,t}$  for smoothing over time, which was based on the scaled distance along the time dimension of the two observations<sup>14</sup>:

$$w'_{c,a,s,t} = \left( 1 - \left( \frac{|t - t_0|}{1 + \max |t - t_0|} \right)^\lambda \right)$$

Next, we calculated the weight  $w''_{c,a,s,t}$  to smooth over age, which is based on a distance along the age dimension of two observations. For a point between the age  $a$  of the observation  $r_{c,a,s,t}$  and a focal observation  $r_{c_0,a_0,s_0,t_0}$ , the weight is defined as follows:

$$w''_{c,a,s,t} = \frac{1}{e^{\omega|a-a_0|}}$$

Finally, these combined weights were multiplied and further adjusted to account for geographic patterns.

Specifically, we defined a geospatial relationship by categorizing data based on the GBD location hierarchy (Appendix Table 6). We adapted the weighting strategy used in previous studies estimating time series of global indicators to be more flexible with respect to estimating subnational locations and to borrow strength from all levels.<sup>15,16</sup> A vector of spatial weights corresponding to each level of the location hierarchy was derived as  $[\xi, \xi * (1 - \xi)^{n_1-1}, \dots, \xi * (1 - \xi)^{n_i-1}, (1 - \xi)^{n_i}]$ , where the vector is expanded to include the number,  $n_i$ , levels in the location hierarchy between the location being estimated and global, which receives a pre-rescaling weight of  $(1 - \xi)^{n_i}$ . For example, estimating a country would use the following weighting scheme:

- Country data:  $\xi$
- Regional data not from the country being estimated:  $\xi * (1 - \xi)$

- Data from other regions in the same super region:  $\xi * (1 - \xi)^2$
- Global data from other super regions:  $(1 - \xi)^3$

A full derivation of weights for each category follow, assuming the location being estimated was a country, follows:

- 1) If the observation  $r_{c,t}$  belongs to the same country  $c_0$  of the focal observation  $r_{c_0,t_0}$ :

$$w_{c,a,s,t} = \frac{\xi (w'_{c,a,s,t} w''_{c,a,s,t})}{\sum_{c=c_0} (w'_{c,a,s,t} w''_{c,a,s,t})} \quad \forall c = c_0$$

- 2) If the observation  $r_{c,t}$  belongs to a different country than the focal observation  $r_{c_0,t_0}$ , but both belong to the same region R:

$$w_{c,a,s,t} = \frac{\xi * (1 - \xi) (w'_{c,a,s,t} w''_{c,a,s,t})}{\sum_{c \neq c_0} (w'_{c,a,s,t} w''_{c,a,s,t})} \quad \forall c \neq c_0 \cap R[c] = R[c_0]$$

- 3) If the observation  $r_{c,t}$  belongs to the same super region SR but to a both different country  $c_0$  and region  $R[c_0]$  than the focal observation  $r_{c_0,t_0}$ :

$$w_{c,a,s,t} = \frac{\xi * (1 - \xi)^2 (w'_{c,a,s,t} w''_{c,a,s,t})}{\sum_{c \neq c_0} (w'_{c,a,s,t} w''_{c,a,s,t})} \quad \forall c \neq c_0 \cap R[c] \neq R[c_0] \cap SR[c] = SR[c_0]$$

- 4) If the observation  $r_{c,t}$  is from a different super region than the focal observation  $r_{c_0,t_0}$  (ie. all other data currently not receiving a weight):

$$w_{c,a,s,t} = \frac{(1 - \xi)^3 (w'_{c,a,s,t} w''_{c,a,s,t})}{\sum_{c \neq c_0} (w'_{c,a,s,t} w''_{c,a,s,t})} \quad \forall c \neq c_0 \cap R[c] \neq R[c_0] \cap SR[c] \neq SR[c_0]$$

To allow additional flexibility and specificity in weighting schemes, we allowed for two different  $\xi$  to be defined. The higher  $\xi$  was applied when at least one age-sex group in the country of estimation had at least five years in the time series covered by at least one data source. The lower  $\xi$  was applied when estimating data-scarce countries.

Observations could be downweighted by a factor of 0.1, usually because they were not geographically representative at the unit of estimation. Details of reasons for downweighting can be found in risk-specific modeling summaries. The final weights were then normalized such that the sum of weights across age, time, and geographic hierarchy for a reference group was 1.

#### Estimating error variance

$\sigma_p^2$  represents the error variance in normal or transformed space including sampling variance of the estimates and predication error from any crosswalks performed. First, variance was systematically imputed if the data extraction did not include any measure of uncertainty. When some sample sizes for data were available, missing sample sizes were imputed as the 5<sup>th</sup> percentile of available sample sizes. Missing variances were then calculated as  $\sigma_p^2 = \frac{p*(1-p)}{n}$  for proportions or were predicted from the mean using a regression for continuous values. When sample sizes were entirely missing and could not

be imputed, the 95<sup>th</sup> percentile of available variances at the most granular geographic level (ie. first country, then region, etc.) were used to impute missing variances. For proportions where  $p*n$  or  $(1-p)*n$  is  $< 20$ , variance was replaced using the Wilson Interval Score method.

Next, if the exposure was modeled as a log transformation, the error variance was transformed into log-space using the delta method approximation as follows,

$$\sigma_p^2 \cong \frac{\sigma_{p'}^2}{p_{c,a,s,t}^2}$$

where  $\sigma_{p'}$  represents the error variance in normal space. If the exposure was modeled as a logit transformation, the error variance was transformed into logit-space using the delta method approximation as follows,

$$\sigma_p^2 \cong \frac{\sigma_{p'}^2}{(p_{c,a,s,t} * (1 - p_{c,a,s,t}))^2}$$

Finally, prior to GPR, an approximation of non-sampling variance was added to the error variance. Calculations of non-sampling variance were performed on normal-space variances. Non-sampling variance was calculated as the variance of inverse-variance weighted residuals from the spacetime estimate at a given location level hierarchy. If there were fewer than 5 data points at a given level of the location hierarchy the non-sampling variance was replaced with that of the next highest geography level with more than 5 data points.

#### Estimating the covariance function

The final input into GPR is the covariance function, which defines the shape and distribution of the trends. Here, we have chosen the Matern-Euclidian covariance function, which offers the flexibility to model a wide spectrum of trends with varying degrees of smoothness. The function is defined as follows:

$$M(t, t') = \sigma^2 \frac{2^{1-v}}{\Gamma(v)} \left( \frac{d(t, t')\sqrt{2v}}{l} \right)^v K_v \left( \frac{d(t, t')\sqrt{2v}}{l} \right)$$

where  $d(\cdot)$  is a distance function;  $\sigma^2$ ,  $v$ ,  $l$ , and  $K_v$  are hyperparameters of the covariance function—specifically  $\sigma^2$  is the marginal variance,  $v$  is the smoothness parameter that defines the differentiability of the function,  $l$  is the length scale, which roughly defines the distance between which two points become uncorrelated, and  $K_v$  is the Bessel function. We approximated  $\sigma^2$  by  $MADN(r'_{c,t})$ , which is the normalized absolute deviation of the difference of the first-stage linear regression estimate from the second-stage spatiotemporal smoothing step for each country, region, or super-region depending on the data coverage at a given location hierarchy level. Here, we have used the parameter specifications  $v = 2$ . The scale parameter  $l$  and the level of the geographic hierarchy at which  $\sigma^2$  was calculated are reported in the risk-specific appendix sections.

#### Prediction using GPR

We integrated over  $g_{c,t}(t_*)$  to predict a full time series for country  $c$ , age  $a$ , sex  $s$ , and the prediction time  $t_*$ :

$$p_{c,a,s}(t_*) \sim N\left(m_{c,a,s,t}(t_*), \sigma_p^2 I + Cov(g_{c,a,s,t}(t_*))\right)$$

Random draws of 1000 samples were obtained from the distributions above for every country for a given indicator. The final estimated mean for each country was the mean of the draws. In addition, 95% uncertainty intervals were calculated by taking the 2.5 and 97.5 percentile of the sample distribution. The linear modeling process was implemented using the lmer4 package in R, and the ST-GPR analysis was implemented through the PyMC2 package in Python.

### Subnational Scaling and Aggregation

To ensure internal consistency of the estimates between countries and their respective subnational locations, national estimates were either created by population-weighted aggregation or subnational estimates were adjusted by population-weighted scaling to the national estimates, depending on the data coverage of a given country compared to that of its subnational locations. For example, if there was better data coverage at the national level, relative to its corresponding subnational locations, for a given country and risk across age, sex, and time, estimates were rescaled to be consistent with the national level. Conversely, if there was better data coverage at the subnational level, estimates for its parent country were generated through population-weighted aggregation of subnational estimates.

### Step 4. TMREL

In this and all previous GBD studies, the counterfactual level of risk exposure used is the risk exposure that is both theoretically possible and minimizes risk in the exposed population that consequently captures the maximum population attributable burden.<sup>2</sup> For each risk evaluated in GBD 2016, Step 4 of the analytical flowchart describes the use of the best available epidemiological evidence from published and unpublished relative risks by level of exposure and the lowest observed level of exposure from cohorts, used to select a single level of risk exposure that minimises risk from all causes of DALYs combined to establish the TMREL. In principle, the TMREL for a given risk may vary by age, sex, and location if supported by clear evidence. Based on the available evidence, the TMREL itself can be uncertain, which is reflected in the 95% uncertainty intervals (UIs) in Table X. An estimation of uncertainty was derived by resampling from a uniform distribution of TMRELS where evidence supporting the selection of the TMREL was uncertain (for example, elevated systolic blood pressure or cholesterol).

### Step 5. Estimate population attributable fractions

Risks are categorised on the basis of how exposure was measured: dichotomous, polytomous, and continuous. High total cholesterol is an example of a risk measured on a continuous scale. The population attributable fraction (PAF), which represents the proportion of risk that would be reduced in a given year if the exposure to a risk factor in the past were reduced to an ideal exposure scenario, is defined for a continuous risk factor as:<sup>17</sup>

$$PAF_{joasgt} = \frac{\int_{x=l}^u RR_{joasg}(x)P_{jasgt}(x)dx - RR_{joasg}(TMREL_{jas})}{\int_{x=l}^u RR_{joasg}(x)P_{jasgt}(x)dx}$$

Where  $PAF_{joasgt}$  is the population attributable fraction for cause  $o$  due to risk factor  $j$  for age group  $a$ , sex  $s$ , location  $g$ , and year  $t$ .  $RR_{joasg}(x)$  is the relative risk as a function of exposure level  $x$  for risk factor  $j$  for cause  $o$ , age group  $a$ , sex  $s$ , and location  $g$  with the lowest level of observed exposure as  $l$  and the highest as  $u$ ;  $P_{jasgt}(x)$  is the distribution of exposure at  $x$  for age group  $a$ , sex  $s$ , location  $g$ , and year  $t$ ;  $TMREL_{jas}$  is the TMREL for risk factor  $j$ , age group  $a$ , and sex  $s$ .

The  $PAF_{joasgt}$  for dichotomous and polytomous risk factors for every country is defined as:

$$PAF_{joasgt} = \frac{\sum_{x=1}^u RR_{joast}(x)P_{jasgt}(x) - RR_{joasg}(TMREL_{jas})}{\sum_{x=1}^u RR_{joas}(x)P_{jasgt}(x)}$$

Where  $PAF_{joasgt}$  is the population attributable fraction for cause  $o$  due to risk factor  $j$  for age group  $a$ , sex  $s$ , location  $g$ , and year  $t$ .  $RR_{joasg}(x)$  is the relative risk as a function of exposure level  $x$  for risk factor  $j$  for cause  $o$ , age group  $a$ , sex  $s$ , and location  $g$  on a plausible range of exposure levels from  $l$  to  $u$ .  $P_{jasgt}(x)$  is the proportion of population in risk group (prevalence), for age group  $a$ , sex  $s$ , location  $g$ , and year  $t$ ;  $TMREL_{jas}$  is the TMREL for risk factor  $j$ , age group  $a$ , and sex  $s$ .

## Step 6. Mediation

### Summary

The portion of the burden of disease that is attributable to various combinations of risk factors or to all risk factors combined has been a topic of broad interest.<sup>18</sup> Assumptions about how one risk factor is mediated through other risk factors are needed in order to estimate the joint risk factor burden for combinations of metabolic risks and behavioural or environmental risks. To accomplish this, in Step 6 of the estimation process, for every two risk factors for an outcome, we estimated the fraction of risk that was mediated through the other risk. This resulted in a matrix of parameters containing each possible pairing of risk factors included in the GBD 2016. Using this matrix, we computed the aggregated burden of disease at each level of the GBD 2016 hierarchy and for all risk factors using the following formula:

$$PAF_{Joasgt} = 1 - \prod_{j=1}^J \left( 1 - PAF_{joasgt} \prod_{i=1}^J (1 - MF_{jio}) \right) \quad (5)$$

where  $J$  is a set of risk factors for the aggregation;  $PAF_{joasgt}$  is the PAF for risk  $j$  for age group  $a$ , sex  $s$ , location  $g$ , and year  $t$ ; and  $MF_{jio}$  is the mediation factor for risk  $j$  mediated through  $i$  for cause  $o$ . Mediation factors can be found in Appendix Table 7.

### Additional detail

In GBD 2010, we only aggregated the burden of risk factors for some clusters of risks including access to improved water and sanitation, child and maternal malnutrition, tobacco smoking, alcohol use, dietary risk factors, occupational risk factors, and sexual abuse and violence. We did not aggregate air pollution and metabolic risk factors. In GBD 2013, GBD 2015, and GBD 2016, we aggregated all risk factors into three large categories: behavioral, environmental and occupational, and metabolic risks -- as well as aggregating all GBD risk factors into a single attributable fraction for each diseases and eventually for all-causes of burden.



Aggregating risk factors at different levels share three essential challenges:

1. Risk factor coexistence or aggregation: for example, metabolic risk factors often occur together or high-risk behaviors are related such as drug abuse and unsafe sex.
2. Mediation: a risk factor may effect another risk factor that lies in the physiological pathway to a disease outcome. It can be inside a cluster of risk factors such as the effect of obesity through an increase in fasting plasma glucose (FPG) and later cardiovascular disease outcomes, or between clusters of risk factors such as the effect of fiber on cholesterol.
3. The formula to calculate the aggregated PAF.

The aggregation method is conceptually applicable to other aggregations such as socioeconomic factors, education, homelessness and refugee status that are being considered for inclusion in future GBD iterations. In the next section, we explain our approach to deal with these challenges.

There are three patterns of associations between risk factors to take into consideration. The first concerns confounding; risk B affects risk A and outcome C (Pattern 1 in *Patterns of associations between risk factors*). In these cases, the relative risk (RR) for A should be adjusted for B, for example the fruit RR is adjusted for smoking. If part of the effect of A is through B, a mediator, we do not adjust the effect of A for B. For example, we do not adjust the RR of BMI for cholesterol as cholesterol lies in the biological pathway between BMI and cardiovascular outcomes (Pattern 2 in *Patterns of associations between risk factors*). The third pattern occurs when risks A and B are proxies of a third variable Z and aggregation aims to estimate the total effect of a latent variable Z, on C. An example is childhood undernutrition, which is measured by stunting, wasting, and underweight as proxies.

Pattern 1

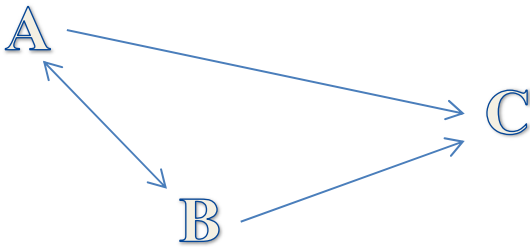

Pattern 2

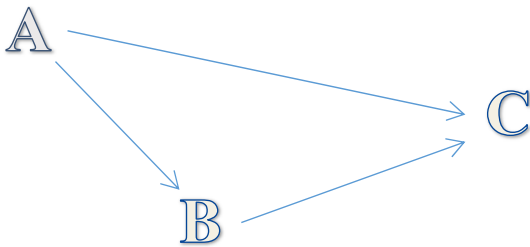

Pattern 3

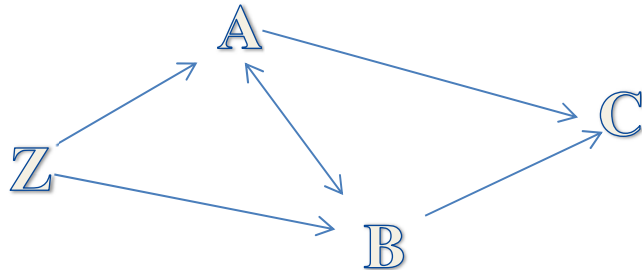

### Calculating burden of multiple risk factors

Validation studies have reported congruency between the true risk associated with multiple risk factors affecting the same outcome and a multiplicative aggregation of the population attributable fractions of the individual risk factors (formula below).<sup>19</sup>

$$PAF_{1..i} = 1 - \prod_{i=1}^n (1 - PAF_i)$$

Where *PAF* is the population attributable fraction and *i* is each individual risk factor. The same validation studies also found that the overestimation from ignoring the covariance between risk factors is small. This was important to note as there are few data sources from which we can draw information on covariance.

We endeavored to evaluate RRs that were controlled for confounders. However, as we had to rely on the literature for many RRs we did not always have full control over the choice of confounders controlled for in each study.

### Adjusting for mediation

When aggregating the effects of multiple risk factors, we included a mediation factor if a part of the effect of one risk factor was included in the effect estimated for in the mediator. First we prepared a list of possible mediations especially between behavioural risks and metabolic risk factors with cardiometabolic outcomes. We did not assume any mediation effect between risk factors for cancers except for sugar sweetened beverages and BMI.

Danaei and colleagues assumed that part of the effect of BMI on ischemic heart disease (IHD) is through high SBP, cholesterol and FPG.<sup>20</sup> The proportion of the BMI effect that can be explained by other metabolic risk factors is the amount of mediation. The difference between the crude RR of BMI on IHD with the RR adjusted for SBP, FPG, and cholesterol reflects the amount of BMI effect on IHD that is mediated and already included in SBP, FPG, and cholesterol:

$$MF = \frac{RR_{crude} - RR_{adjusted}}{RR_{crude} - 1}$$

We used this approach for estimating mediation factors to adjust PAFs before aggregation.

$$MF = \frac{R_c^+ - R_a^+}{R_c^+ - R_c^-}$$

$$\text{So: } R_a^+ = R_c^+ - MF * (R_c^+ - R_c^-)$$

$$PAF_c = \frac{p * (R_c^+ - R_c^-)}{p * R_c^+ + (1 - p) * R_c^-} = \frac{p * (R_c^+ - R_c^-)}{R_T}$$

If  $R_c^+$ : crude risk of outcome in exposed population

$R_c^-$ : crude risk of outcome in non-exposed population

$R_a^+$ : adjusted risk of outcome in exposed population

$R_a^-$ : adjusted risk of outcome in non-exposed population

$R_T$  is the overall rate of the outcome in the population. Since we are interested in the part which is from BMI but through cholesterol, the total risk in the population will be the same for the adjusted RR, so the unmediated part of the risk factor would be:

$$PAF_a = \frac{p*(R_a^+ - R_a^-)}{R_T} = \frac{p*(R_c^+ - MF*(R_c^+ - R_c^-) - R_c^-)}{R_T} = \frac{p*(R_c^+ - R_c^-)*(1 - MF)}{R_T} = PAF_c * (1 - MF)$$

So for aggregating the PAF of multiple risk factors, we first calculated the part of the effect of every risk factor that is not mediated and then aggregated these assuming they are independent.

Therefore the aggregated PAF would be:

If MF is mediation factor of R2 through R1:

$$PAF_{1,2} = 1 - (1 - PAF_1) * (1 - PAF_2 * (1 - MF_{2/1}))$$

and a generalization for multiple pathways of R1 through other RFs:

$$PAF_{1..i} = 1 - \prod_{i=1}^n \left( 1 - PAF_i * \left( 1 - \prod_{j=1}^n (1 - MF_{i/j}) \right) \right)$$

For every risk factor outcome pair, the matrix of possible mediations was calculated and used. For some risk factor aggregations, we simply added PAFs. For example, the total burden of smoking including smoking and secondhand smoke is the sum of the estimates of the individual risks because we estimate the burden of secondhand smoke in non-smokers only.

## Calculating mediation factor

### 1 – Comparing crude RR versus mediator-adjusted RR

The best example is the mediation of BMI through SBP, FPG, and cholesterol reported by Danaei et al.<sup>20</sup> In their meta-analysis, they report the adjusted and unadjusted RR of BMI on IHD and stroke based on combined data from individual cohorts. They calculated the mediation factor using the equation below, and we used it directly as mediation factor in risk factor aggregation. Using individual level data from cohort studies, we estimated the mediation factor for other metabolic risk factors and some dietary risks.

$$MF = \frac{RR_{crude} - RR_{adjusted}}{RR_{crude} - 1}$$

### 2 – Estimating the mediation factor by pathway of the effect

For many other risk factors, there are no data available to use the first method. Instead, we searched studies to estimate the effect of the risk factor on the mediator and finally the expected increase in IHD risk. We pooled available studies to calculate the unit increase in the mediator per unit increase in the risk factor to calculate the size of the IHD RR.

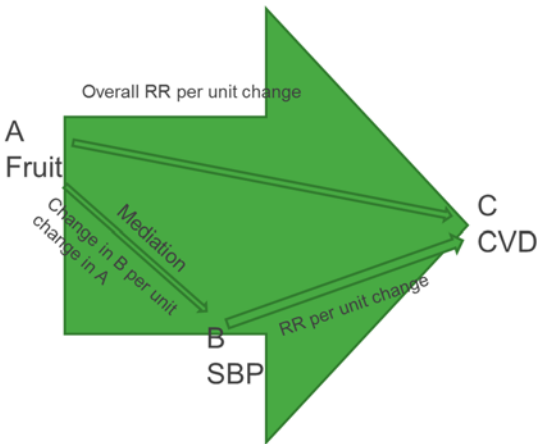

Example of pathway between fruit, high systolic blood pressure, and cardiovascular diseases

We have RRs for the effect of A on C and B on C in GBD from a meta-analysis of studies in the literature. The effect of A on B was estimated by analysis of diet trials.

$$RR_{ABC} = RR_{BC}^{\Delta_{AB}}$$

$RR_{ABC}$  is expected effect of A through B on C

$RR_{BC}$  is relative risk of each unit increase in mediator on outcome C

$\Delta_{AB}$  is change in mediator level B per each unit change in A

If  $RR_{AB}$  is the overall effect of A on B then:

The mediation factor would be

$$MF = \frac{RR_{ABC} - 1}{RR_{AB} - 1}$$

We kept uncertainty of each parameter by generating and following 1000 draws of the estimates to calculate 1000 draws of the posterior distribution of the mediation factor. We did not include risk-mediator pairs if the mediation factor was not significant at 5% level (more than 50 out of 1000 draws were negative). We truncated the mediation factor distribution at 1 where the whole effect of the risk factor on the outcome would be assumed to be through the mediator pathway.

Some mediation factors equal 1 where the whole effect was calculated through other risk factor, e.g. the effect of sugar-sweetened beverages through BMI or salt through SBP, or when we assumed other risk factors are sources of the exposure, for example, fiber is provided by consuming fruit, vegetable, and whole grains and all the beneficial effect of milk on colorectal cancer is mediated through calcium.

### Dietary risk factors

For each dietary risk factor, we searched for randomized trials evaluating the effect of the diet component on metabolic risk factors and estimated the change in a given mediator per unit change in the diet component.

### Physical activity

We found cohort studies on the effect of physical activity on FPG. The data was more on the effect of physical activity on diabetes incidence, so we calculated the shift in FPG using the provided RR value. We used this to calculate the mediated part of effect of physical activity on cardiovascular disease (CVD).<sup>21–27</sup>

### **Air pollution**

We looked for cohort and time series studies but the data were limited. We found only one study with the effect of last year average of particle pollution PM 2.5 on SBP, FPG and cholesterol.<sup>28</sup> However, the effects through FPG and cholesterol were bigger than the effect expected for that level of PM2.5, indicating significant overestimation of the mediation. We found time series studies with different PM2.5 lag (by day) that show very short-term and confounded effects. So we decided to add this when stronger evidence is available.

### **Assumed mediations**

For the risk factors with PAFs of 100% such as FPG and diabetes, low estimated glomerular filtration rate and chronic kidney disease, hypertension and hypertensive heart disease, alcohol and alcohol disorders, childhood underweight and protein-energy malnutrition, and childhood wasting and protein-energy malnutrition, and drug use and drug use disorders, no mediation is needed.

### **Piecewise aggregation (Pattern 3)**

There are three anthropometric indicators that are highly correlated: childhood underweight, stunting, and wasting, as demonstrated in *Venn diagram demonstrating the correlation between childhood underweight, stunting, and wasting*. Available RRs for each indicator are not adjusted for the other two because there is a high correlation between these indicators and also interaction where the majority of the burden occurs. Estimating the total burden due to undernutrition, a latent variable, is difficult. The three anthropometric indicators are not independent, so the covariance between them should be considered. This was the main reason that GBD 2010 only included childhood underweight. If covariance between these indicators is significant (as is shown in the Figure below), aggregating these indicators assuming independence would overestimate the total burden significantly.

To use the best available data, we adjusted observed RRs reported by Olofin et al for underweight, stunting and wasting by simulating the joint distribution of the three indicators using the distribution of each indicator and covariance between indicators in the countries included in the meta-analysis (extracted from Demographic and Health Survey (DHS) micro-data).<sup>29</sup> Based on the analysis done by McDonald et al, we assumed there is an interaction between the three indicators, and extracted the interaction terms from the corresponding analysis.<sup>30</sup> We calculated the adjusted RRs by minimizing the error between observed crude RRs (from meta-analysis) and expected crude RRs derived from adjusted RRs.

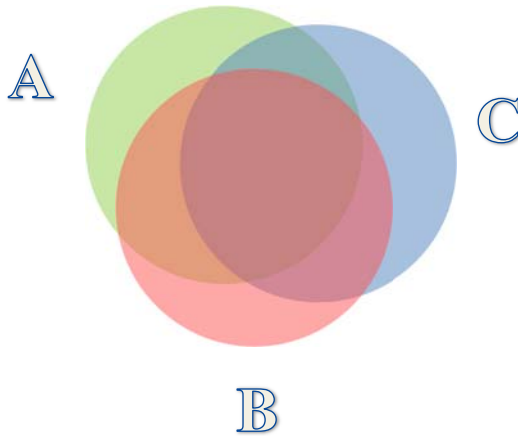

*Venn diagram demonstrating the correlation between childhood underweight, stunting, and wasting*

After adjusting for the three risk factors, we calculated the PAFs and aggregated underweight, stunting and wasting burden.

### **Uncertainty of aggregated and mediated PAFs**

We generated 1000 draws of posterior distribution of mediation factor calculated by different methods to use beside draws of other inputs to the PAF aggregation.

### **Important assumptions in aggregating risk factors and including mediation**

1 – The mediation factors or PAF adjustments are similar across countries, age, sex, and years. While it is quite likely that the size of mediation is different in different populations, there is little data to inform the covariance between different risk factors or the mediation factor amount by age and countries. For example, in some countries, the size of the mediated BMI-IHD PAF through cholesterol, calculated by the mediation factor, was even bigger than the total burden of cholesterol, indicating that less effect of BMI is mediated through cholesterol and mediation factors are not similar across countries.

2 – For many risk-mediator-outcome pairs, there are no data available, so we assumed the mediation is zero.

3 – Since the covariance between undernutrition indicators is different by location (and across time, results were not reported), and there is an interaction between these indicators, the total burden might be underestimated.

4 – It is assumed that there is no significant covariance between PAFs, which might not be true between some risk factors such as between metabolic risk factors. While this overestimation is controlled by using adjusted RRs, using crude RRs for BMI and other metabolic risk factors may cause significant overestimation of aggregated metabolic risks burden.

### **Step 7. Estimate attributable burden**

Four key components are included in estimation of the burden attributable to a given risk factor: the metric of burden being assessed (the number of deaths, years of life lost [YLLs], years lived with disability [YLDs], or DALYs [the sum of YLLs and YLDs]); the exposure levels for a risk factor; the relative

risk of a given outcome due to exposure; and the counterfactual level of risk factor exposure. Estimates of attributable burden as DALYs for risk-outcome pairs were generated using the following model:

$$AB_{jasgt} = \sum_{o=1}^w DALY_{joasgt} PAF_{joasgt}$$

where  $AB_{jasgt}$  is the attributable burden for risk factor  $j$  for age group  $a$ , sex  $s$ , location  $g$ , and year  $t$ ;  $DALY_{joasgt}$  is total DALYs for cause  $o$  (of  $w$  relevant outcomes for risk factor  $j$ ) for age group  $a$ , sex  $s$ , location  $g$ , and year  $t$ ;  $PAF_{joasgt}$  is the population attributable fraction (PAF) for cause  $o$  due to risk factor  $j$  for age group  $a$ , sex  $s$ , location  $g$ , and year  $t$ . The proportion of deaths, YLLs, or YLDs attributable to a given risk factor or risk factor cluster were analogously computed by sequentially substituting each metric in place of DALYs in the equation above.

### Other analysis: Decomposition of deaths and DALYs

We conducted two related decomposition analyses of changes in DALYs from 2006 to 2016: (1) decomposing changes in all-age cause-specific DALYs attributable to all risk factors due to changes in population growth, population age structure, exposure to all risks for a disease, and risk-deleted death and DALY rates; and (2) decomposing changes in age-specific all-cause DALYs attributable to all risk factors due to changes in population growth, population age structure, exposure to all risks for a disease, and risk-deleted DALY rates. In this case, risk-deleted rates are the rates after removing the effect of a risk factor or combination of risk factors; in other words, observed DALY rates multiplied by one minus the PAF for the risk or set of risks. Our decomposition analyses draw from methods developed by Das Gupta<sup>31</sup> to provide a computationally tractable solution to isolating drivers of burden changes whereby all combinations of possible pathways are averaged across factors. Attributable burden is determined, following the methods of Das Gupta, as a product of three factors such that:

$$T_{asgt} = (A_{asgt} B_{asgt} C_{asgt})$$

where  $T_{asgt}$  represents the attributable burden at year  $t$ ;  $A_{asgt}$  is the age-specific population size for a given age group  $a$ , sex  $s$  and location  $g$  at year  $t$ ;  $B_{asgt}$  is the underlying rate of the outcome unrelated to the risk factor or observed rate, multiplied by  $1 - PAF$  for a given age group  $a$ , sex  $s$  and location  $g$  at year  $t$ ; and where  $C_{asgt}$  is the ratio of attributable burden to the underlying rate, which reflects the risk effect for a given age group  $a$ , sex  $s$ , and location  $g$  at year  $t$  defined as  $PAF/(1 - PAF)$  in the case of decomposing attributable burden to a risk. The contribution of each factor to total change in attributable burden was determined by changing the level of one factor from time  $t_0$  to  $t_1$  – here 2006 to 2016 – with all other factors held constant. Thus, the effect of any of the three factors, for example  $A_{asgt}$  on the change of attributable burden between 2006 ( $A_{06}$ ) and 2016 ( $A_{16}$ ) is calculated as:

$$E_A = (A_{16} - A_{06}) \left( \frac{B_{06}C_{06} + B_{16}C_{16}}{3} + \frac{B_{06}C_{16} + B_{16}C_{06}}{6} \right)$$

Where  $E_A$  is the proportion of change due to factor  $A$ , and the subscripts for each factor in the equation denote the year for each estimate. Since the effect depends on the order of entry of the factor, we calculated the average of all combinations of the three factors.<sup>31</sup> The proportion of change due to factor  $A_{asgt}$ , the age-specific population size for a given age group  $a$ , sex  $s$  and location  $g$  at year  $t$ , is

then further split, setting change in population growth equal to the percent change in all-age population from time  $t_0$  to  $t_1$  and change in population age structure to the residual, giving our final four factors.

This three factor decomposition method does not work for risks where the PAF, by definition, is 100% (such as high fasting plasma glucose and diabetes) or where the PAF is directly estimated (such as for unsafe sex and HIV). In the cases of child underweight and protein-energy malnutrition, child wasting and protein-energy malnutrition, short gestation for birth weight and neonatal preterm birth complications, low birth weight for gestation and neonatal preterm birth complications, iron deficiency and iron-deficiency anemia, vitamin A deficiency and vitamin A deficiency, alcohol use and liver cancer due to alcohol use, alcohol use and cirrhosis and other chronic liver diseases due to alcohol use, alcohol use and alcohol use disorders, alcohol use and alcoholic cardiomyopathy, drug use and drug use disorders, occupational particulate matter, gases, and fumes and other pneumoconiosis, occupational exposure to asbestos and asbestosis, and occupational exposure to silica and silicosis, we used a two factor decomposition method, which examines the contribution of population, ageing, and risk exposure. Effectively, we assume trends in these cases are driven by exposure, not change in the risk-deleted rates. Conversely for unsafe sex and sexually transmitted diseases excluding HIV, we used a two factor decomposition method, which examines the contribution of population, ageing, and risk-deleted death and DALY rates, assuming trends in these cases are driven by risk-deleted rates, not change in exposure. For high fasting plasma glucose and diabetes mellitus, high fasting plasma glucose and chronic kidney disease due to diabetes mellitus, high systolic blood pressure and hypertensive heart disease, high systolic blood pressure and chronic kidney disease due to hypertension, and impaired kidney function and chronic kidney disease, we used GBD estimates of SEVs for the given risk and the case-fatality rate decompose trends into the contribution of the three factors. Similarly for unsafe sex and cervical cancer, we used GBD estimates of the incidence of cervical cancer and the case-fatality rate to decompose trends into the contribution of the three factors. For unsafe sex and HIV we used spectrum counterfactual and CD4 risk-weighted prevalence.

## Other analyses: SDI

### Development of SDI

The SDI is a composite indicator of development status constructed for GBD-2015 whose components are strongly correlated with health outcomes. It is the geometric mean of 0 to 1 indices of total fertility rate, mean education for those aged 15 and older, and lag distributed income per capita.

SDI was calculated using the Human Development Index (HDI) methodology, wherein an index value was determined for each of the covariate inputs (log lag distributed income [LDI], mean educational attainment over age 15, and total fertility rate [TFR]). For GBD 2015, these indices were computed on the basis of a relative scale, in which the upper and lower bounds were established by the maximum and minimum observed values, respectively, for each input over the entire estimation period of 1980-2015.

### Updates to SDI Computation for GBD 2016

Prompted by the observations that the scales (and by extension SDI) were sensitive to the addition of new subnational locations as GBD becomes more granular and to the length of the time period over which SDI is computed, for GBD 2016 we implemented fixed scales in determining individual indices. Thus, an index score of 0 now represents the minimum level of each covariate input past which selected summary health outcomes can get no worse. An index score of 1 represents the maximum level of each covariate input past which these selected health outcomes cease to improve. As a composite, a location



with an SDI of 0 would have a theoretical minimum level of development relevant to these health outcomes, while a location with an SDI of 1 would have a theoretical maximum level of development relevant to these health outcomes.

We selected the minima and maxima of the scales by examining the relationships each of the inputs had with life expectancy at birth and under-5 mortality and identifying points of limiting returns at both high and low values, if they occurred prior to theoretical limits (e.g., a TFR of 0). The final scales are summarised in the table below.

| Input                                             | Lower Bound                        | Upper Bound               |
|---------------------------------------------------|------------------------------------|---------------------------|
| TFR                                               | 1.5 <sup>a</sup>                   | 8                         |
| LDI per capita                                    | 250 USD (5.5 log USD) <sup>b</sup> | 60,000 USD (11.0 log USD) |
| Mean educational attainment for ages 15 and older | 0 years                            | 17 years                  |

<sup>a</sup> The low point of limiting returns for TFR was identified at 1 during GBD 2015; however, incorporating feedback with regard to accounting for a pattern of TFR rebound in highly developed countries, we instead set the lower limit of TFR at 1.5.

<sup>b</sup> The minimum for the LDI scale was originally set at the theoretical limit of 0 USD, as we did not observe an asymptotic relationship between log(LDI) and  $E_0$  or  $5q_0$  at lower values of log(LDI). Empirically, however, we also did not observe an LDI below 350 USD (5.86 log USD) for the estimation period 1970-2016. In log-space, this meant that approximately half of our scale was not being utilized, compressing the observed variation in LDI and diminishing its meaningful contribution to SDI. Accordingly, we set the lower limit on LDI to 250 USD (5.52 log USD) to ensure we were fully utilizing the range of the scale to capture its variation across space and time, as is the case with the other two inputs.

Using the limits on the scales described above, we computed the index scores underlying SDI analogously to GBD 2015 as follows:

$$I_{cly} = \frac{(C_{ly} - C_{low})}{(C_{high} - C_{low})}$$

Where  $I_{cly}$  – the index for covariate  $C$ , location  $l$ , and year  $y$  – is equal to the difference between the value of that covariate in that location-year and the lower bound of the covariate divided by the difference between the upper and lower bounds for that covariate. If the values of input covariates fell outside the upper or lower bounds (e.g. LDI per capita greater than 60,000 USD), they were mapped to the respective upper or lower bounds. We also note that the index value for TFR was computed as  $1 - I_{TFRly}$ , as lower TFRs correspond to higher levels of development, and thus higher index scores. For GBD 2016 we expanded the computation of SDI to 755 national and subnational locations spanning the time period 1970-2016.

The composite SDI is the geometric mean of these three indices for a given location-year. The cutoff values used to determine quintiles for analysis were then computed using country-level estimates of SDI for the year 2016, excluding countries with populations less than 1 million.

#### Example calculation

Below we present the calculation of SDI for Mexico in the year 2010:

$$TFR = 2.43; \text{ Mean educ yrs pc} = 9.23; \ln LDI = 9.58$$

$$I_{TFR} = 1 - \frac{2.43 - 1.5}{8 - 1.5} = .855$$

$$I_{Educ} = \frac{9.23 - 0}{17 - 0} = .543$$

$$I_{lnLDI} = \frac{9.58 - 5.52}{11.00 - 5.52} = .741$$

$$SDI = \sqrt[3]{I_{TFRR} * I_{Educ} * I_{lnLDI}} = \sqrt[3]{.855 * .543 * .741} = .701$$

SDI values can be found in Appendix Table 8, and SDI by location can be found in Appendix Table 9.

## Additional Methods Information

### Risk-specific comparisons to other estimates

#### *Low birth weight / Short Gestation:*

GBD 2016 estimates of total preterm birth prevalence are generally in line with country-specific reports<sup>30</sup> as well as the most recent global analysis completed by Blencowe and colleagues.<sup>31</sup> GBD 2016 estimates of preterm birth rate are slightly higher, 12.52% (95% UI: 10.69% to 14.47%) versus 11.1%, than the estimates by Blencowe and colleagues. Close agreement is not surprising as most of the same data sources were used as data inputs to our modeling process, although the GBD analysis included almost eight times as many data points. Most reports, like GBD 2016, have assessed temporal trends in preterm birth in many locations to either be static or increasing. Compared to UNICEF estimates of low birth weight,<sup>32</sup> GBD 2016 estimates global birth prevalence of 13.83% (12.76% to 15.09%) are generally lower than the estimate of 15.5% birth prevalence globally, a difference which is most likely explained by the fact that GBD 2016 has not implemented a uniform upward 24% correction factor for reported birth weights. The geographic variation in low birth weight largely mirrors that of the UNICEF report.

#### *Smokeless Tobacco*

We compared GBD estimates to recent research by Siddiqi et al.<sup>33</sup> on smokeless tobacco prevalence, risk, and burden in 2015. Our methods differed from Siddiqi on some key points:

- Prevalence estimation: We estimated both age-sex specific and aggregate current smokeless tobacco use prevalence for all countries and territories included in GBD from 1990-2016 using all available data. Siddiqi et al. used only the single most recent survey available containing data on smokeless tobacco use among adults.
- Relative risks and attributable burden: GBD excluded hospital-based case-control studies, while Siddiqi included them. GBD calculated separate relative risks by tobacco type (and by sex for oral cancer only), while Siddiqi calculated separate relative risks by geography, and then pooled these to produce global relative risks. In producing attributable burden, GBD classified countries as predominantly using snuff/snus or chew based on input from smokeless tobacco experts. Type-specific relative risks were then applied to countries based on their classification. Siddiqi used country- or region-specific relative risks where available, and in the absence of region-

specific relative risks assigned global relative risks in countries predominantly using products with moderate to high pH and TSNAs levels.

The main differences in attributable burden come from the relative risk exclusion criteria. GBD's exclusion of hospital-based led to very different relative risk outputs: we found significant relative risks for oral cancer and oesophageal cancer, and only for users of chewing tobacco. Siddiqi found significant relative risks for oral, pharyngeal, and oesophageal cancers and ischemic heart disease, resulting in higher levels of global burden. Despite different methods in mapping tobacco types, both studies concluded that the causal evidence for applying risks in much of Europe and the Americas was too weak to estimate attributable burden.

### *Smoking*

We compared GBD estimates to the most recent report on the global tobacco epidemic published by the WHO<sup>32</sup>. Overall, we found marked similarities in estimates. Among the 142 countries and territories included in the WHO report and estimated in GBD, the correlation coefficient for daily smoking prevalence estimates among females was 0.96 and among males was 0.90. In cases where estimates diverge, discordance can be attributed to differing modeling methods or data sources. GBD uses spatiotemporal Gaussian process regression to estimate smoking prevalence, whereas WHO uses Bayesian meta-regression (DisMod MR). Additionally, the WHO model was fit on 1,175 country-year data sources, whereas the GBD model was fit on 2,887 country-year data sources. There are no comparable global estimates of the burden of disease attributable to smoking, as GBD 2015 estimates of attributable burden were used in the most recent WHO report.

### *Ambient air pollution*

In the past few years, other researchers have estimated the burden of disease due to air pollution using different data and methods. In recent estimates from WHO<sup>33</sup> of 3.0 million deaths in 2012 used the same exposure estimates as presented here, but an earlier (GBD 2013) version of the integrated exposure response (IER) and somewhat different baseline disease burden estimates. Lelieveld and colleagues<sup>34</sup> analysed source sector contributions to air pollution and the resulting disease burden in 2010 and estimated the burden in 2050. These estimates used an older (GBD 2010) IER. Furthermore, the coarse spatial resolution (~100 × 100 km) of the exposure estimates introduced errors via spatial misalignment between exposure and population density compared with our estimates.

### *Occupational*

Takala et al<sup>35</sup> reported 2.3 million deaths attributable to occupational injury/illness in 2011. In the comparison year 2010, GBD estimated 1.4 million deaths. This discrepancy is largely driven by the cause-outcome pairs that GBD currently has the evidence to include based on the criteria of the CRA framework. For example, 45% of Takala's reported burden is driven by occupational circulatory disease (35%) and occupational communicable disease (10%). Circulatory diseases are linked to occupational risks like shift work and lack of control but the GBD approach currently has insufficient evidence to estimate the variability in exposure to these factors on a global scale. Additionally, the use of a CRA approach in GBD estimates requires careful consideration of proposed counterfactual in order to derive the TMREL for a given risk. The TMREL for something like occupational lack of control is a challenging concept and as such these risks are still being reviewed for possible inclusion in future iterations of the GBD.

Takala also reports higher burden from occupational cancer based on the inclusion of carcinogens that are currently still out of the scope of GBD. For example, the authors use attributable fractions derived from Rushton et al to attribute pairs like breast cancer and shift work or skin cancer and solar radiation. These carcinogens, which form a large part of the cancer burden in Takala/Rushton are currently not included in the GBD based on limited exposure data across the time/space that GBD estimates for.<sup>36</sup>

In terms of fatal occupational injuries, Takala reported 353,000 deaths in 2011. The GBD 2016 estimate for deaths attributable to occupation was 335,000 deaths for 2016. The figures are similar but the GBD estimates are slightly lower, again due to the selection of risk-cause pairs. The ILO estimation strategy includes some kinds of injuries, such as deaths due to intentional violence that the GBD does not attribute to occupation.

#### *Child growth failure (stunting, wasting, and underweight)*

UNICEF et al.<sup>37</sup> estimate lower proportion of stunting (height-for-age z-score < -2 standard deviations below the reference median) in children under 5 in 2016 than GBD 2016, 22.9% (UNICEF et al) vs 25.9% [25.2-26.6%] (GBD 2016). The geographic patterns generally agree in identifying sub-Saharan Africa and South Asia as the regions with the largest burden of stunting (prevalence and magnitude, estimated as number of stunted children in UNICEF et al, and as DALYs in GBD 2016), with additional high prevalence in Oceania (excluding Australia and New Zealand) and moderate prevalence in Latin America and the Caribbean. While the UNICEF et al estimates highlight minimal or lack of progress in reducing stunting since 2000 in Africa and Oceania, GBD 2016 estimates show moderate decline in sub-Saharan Africa and North Africa and the Middle East, and a small decline in Oceania (compared to UNICEF et al's rise in stunting prevalence in Oceania).

There is generally high consistency between the UNICEF et al and GBD 2016 estimates for wasting (weight-for-height z-score < -2 standard deviations below the reference median) among children under 5 in 2016. Both sets of estimates identify the highest proportion of wasting in South Asia (15.4% UNICEF et al, 15.5% [15.1-15.9%] GBD 2016), with the next highest in sub-Saharan Africa (UNICEF et al estimates range from 5.5-8.5% depending on the region in Africa, while GBD 2016 estimates 9.4% [9.1-9.8%]). There is a similar high burden identified in Oceania (excluding Australia and New Zealand). While both sets of estimate identify low prevalence in Latin America and the Caribbean (2.4% [2.2-2.5%] in GBD 2016), GBD 2016 does estimate a higher percentage of wasted children in high-income countries (1.0% [0.9-1.1%]) than does UNICEF et al (0.5% in North America).

GBD 2016 estimates show a downward trend in the prevalence of underweight (weight-for-age z-score < -2 standard deviations below the reference median) among children under 5 in 2016, driven largely by populations in sub-Saharan Africa and South Asia, a trend also reflected in the UNICEF et al estimates. For the year 2016, the two estimates are consistently somewhat higher in GBD compared with UNICEF, with the highest burdens in South Asia (28.1% in UNICEF et al, 34.0% [32.3-35.8%] in GBD 2016) and Africa (15.7% in UNICEF et al, 17.9% [17.0-18.8%] for sub-Saharan Africa in GBD 2016). Global prevalence in 2016 is estimated as 14.0% in UNICEF et al, while GBD 2016 estimates global prevalence at 16.2% [15.7-17.0%].

#### *Impaired Kidney Function*

Recently published estimates<sup>38</sup> from a meta-analysis of global data on exposure to impaired kidney function indicate prevalence of chronic kidney disease (CKD) stages 1-5 to be 13.4% (11.7-15.1%). These

estimates are similar to the current GBD 2016 exposure estimates across all four levels of impaired kidney function, which indicate a prevalence for individuals over the age of 25 of 14.5% (13.5-15.5%).

#### *Household Air Pollution*

The WHO estimated 4.3 million deaths and 146.5 million DALYs attributable to exposure to household air pollution globally in 2012, as compared to GBD 2016 estimates for the year 2010 of 2.5 million deaths and 88 million DALYs. Differences in attributable burden arise between WHO estimates and GBD 2016 for a number of reasons. First, the IER curve was used for all outcomes (LRI, IHD, cerebrovascular stroke, COPD and lung cancer) except cataracts in our analysis, while WHO adapted relative risks for COPD based on epidemiological evidence. The resulting relative risks for COPD used by the WHO are stronger than the relative risks used in GBD, resulting in a larger PAF. Second, we have expanded the database that maps solid cooking fuel use to indoor PM 2.5 exposure, which has resulted in lower PM 2.5 exposure estimates globally. This also allows us to construct more granular relative risks using the IER curve, while the WHO relies on global relative risks. In addition to the differences in data sources, we estimated the burden of cataract attributable to household air pollution (HAP) only in women while WHO estimated for both sexes. One final reason GBD attributable burden estimates are lower than those produced by the WHO is that GBD adjusts for ambient air pollution exposure since some personal PM 2.5 exposure is due to ambient, not indoor, pollution. The WHO does not make any adjustment for ambient air pollution exposure.

Below is a comparison between the WHO and GBD 2016 of the percent of deaths attributed to HAP contributed by each cause (GBD 2016 on right):

- |                               |                    |
|-------------------------------|--------------------|
| • 12% -pneumonia/LRI          | 28%- pneumonia/LRI |
| • 34% -stroke                 | 20%-stroke         |
| • 26% -ischemic heart disease | 24%-IHD            |
| • 22% -COPD                   | 23%-COPD           |
| • 6% -lung cancer.            | 5%-lung cancer     |

#### *Breastfeeding*

CDC reports 18.8% of mothers in the United States in 2011 exclusively breastfeed their child up to 6 months of age, while GBD 2016 estimates that value to be 22.5%. Additionally, CDC reports 49.4% of mothers in the U.S. continue to breastfeed at 12 months of age. GBD estimates 24% of mothers in the U.S. continue to breastfeed from 6-24 months of age. In India, the WHO and UNICEF's estimate of exclusive breastfeeding prevalence in children under 6 months was 46% in 2011, while GBD estimates 40%. The main difference between the two estimation techniques is that GBD incorporates additional data sources beyond what the report by WHO and UNICEF used.

#### *WaSH*

Joint Monitoring Project<sup>36</sup> (JMP) lead by the WHO and UNICEF estimate water, sanitation, and handwashing access throughout the world. Globally, JMP estimates that 91% of population had access to an improved water source in 2015, while GBD estimates 88% of the population have access to

improved water. Additionally, JMP reported the global prevalence of households with piped water connection to be 57% in 2015, while GBD reports piped prevalence of 51% for that year. JMP reported 68% of population had access to improved sanitation in 2015, whereas GBD estimates improved sanitation prevalence of 75%. The slight discrepancies in these estimates at the global Level can be largely attributed to differences in input data. The JMP relies almost exclusively on large-scale household surveys (DHS and Multiple Indicator Cluster Surveys [MICS]), while GBD estimates incorporate exposure data from smaller, yet still nationally representative, survey series such as Reproductive Health Survey and various country specific surveys. Due to the relative dearth of data regarding access to handwashing facility, the JMP only generates handwashing estimates for a select number of countries (mostly sub-Saharan Africa) where that data is actually collected. However, GBD models and predicts handwashing facility prevalence for all locations, even in the absence of data, and estimates that 67% of the globe has access to handwashing facility.

### *Lead*

The most recent external estimates for the burden of lead exposure were conducted by the WHO in 2004 and provided disaggregated average exposures for children and adults in different regions of the world.<sup>39</sup> The GBD 2016 exposure estimates for the early 2000s match most of these regional estimates fairly well. The WHO study also calculated a global burden attributable to lead exposure of 13 million DALYs, which includes 229,000 deaths. This is very similar to our 2005 estimate of nearly 13.2 million DALYs attributable to lead exposure, including approximately 464,000 deaths.

While the overall estimates are similar, the breakdown of burden from intellectual disability and cardiovascular disease is very different. Both attribute 2-3% of global CVD to lead exposure, but our estimates of CVD burden in 2005 seem to be much higher than theirs (such that we estimate 9.7 million DALYs from CVD due to lead in 2005 compared to their estimate of 3.1 million). Additionally, our methodology for intellectual disability differs substantially from theirs. In the WHO study, they used a higher disability weight of 0.361 for intellectual disability whereas we currently use weights ranging from 0.01-0.2 (depending on the severity). However, their estimates of intelligence quotient (IQ) shift from lead exposure are much lower than ours, since recent studies have provided better evidence for notable effects of lead on IQ at low levels of exposure. Still, due to differences in our estimates of the underlying burden of intellectual disability, our estimate of 2.9 million DALYs from intellectual disability attributable to lead exposure in 2005 is much smaller than their estimate of 9.8 million.

### *Intimate partner violence*

The WHO reports a global lifetime prevalence of physical and/or sexual intimate partner violence among ever-partnered women of 30.0% (27.8-32.2%).<sup>40</sup> For GBD 2016, the estimated all-age global exposure for intimate partner violence (IPV) in 2016 is 17.2% (14.2-20.3%) among all women, which is a smaller estimate than the WHO estimate because the WHO estimates are among only ever-partnered women and the estimates used for GBD risk factor exposure are among all women. After making an adjustment using our model for the proportion of women who have ever been partnered, we estimate global lifetime IPV exposure as 29.3% (23.7-35.4%) among ever-partnered women – an estimate that agrees with the WHO report. The regional distribution reported by the WHO is in agreement with the distribution by GBD super-region; highest prevalence of IPV in North Africa and Middle East; South Asia; and sub-Saharan Africa and lower prevalence in Southeast Asia, East Asia, and Oceania; Central Europe, Eastern Europe, and Central Asia; High-income; and Latin American and Caribbean.

### *Iron deficiency*

Iron deficiency (ID) was the 22nd ranked level 3 risk factor in 1990, increasing to 19th in 2016 after increasing 24.7% to 35.8 (24.1 - 50.7) million attributable DALYs, almost all of which was YLDs due to iron deficiency anaemia (IDA). We have not identified any other global, systematic analyses of ID as a risk factor for increased disease burden so we are not able to compare our estimates of ID-attributable health loss. There are a number of other studies that have evaluated the prevalence of ID and IDA, however.<sup>37</sup> The most comprehensive meta-analysis from LMIC estimated a much lower prevalence of ID/IDA than we have for GBD 2016. There are three aspects that make a direct comparison with GBD 2016 difficult. First, the study by Petry and colleagues likely underestimated ID/IDA somewhat by applying a single cutoff for diagnosing ID of <12 grams per deciliter of plasma ferritin concentration, especially with the acknowledged limitation of not being able to fully account for the effect of inflammation in many of its component studies. Second, Petry and colleagues did not distinguish etiologies of ID/IDA whereas GBD does distinguish many causes of anemia (e.g. hookworm, gastritis) that can manifest as ID. Third, whereas Petry and colleagues made direct estimation of ID/IDA from serum measurements, the GBD approach for estimating ID/IDA is indirect and therefore does not have a directly comparable case definition. We began by first estimating overall anemia then, after reassigning large portions to >25 other underlying causes, used fixed proportion redistribution methods to estimate IDA. The risk exposure for ID was then estimated as a counterfactual hemoglobin concentration in the absence of all the “other” causes rather than an explicit prevalence value. Unless all possible causes of anemia are included, the GBD approach has potential to overestimate the proportion of anemia to be redistributed to ID/IDA in places where other causes are important. We have begun work to address this in GBD 2016 by adding HIV as a cause of anemia, but there are still a number of others (e.g. cancers, alpha thalassemia, intestinal infections, cirrhosis, inflammatory bowel disease) that have yet to be included.

## References

- 1 Murray CJ, Lopez AD. Global mortality, disability, and the contribution of risk factors: Global Burden of Disease Study. *Lancet* 1997; **349**: 1436–42.
- 2 Murray CJ, Lopez AD. On the comparable quantification of health risks: lessons from the Global Burden of Disease Study. *Epidemiology* 1999; **10**: 594–605.
- 3 Forouzanfar M, Afshin A, Alexander LT, Anderson H, Bhutta Z, Murray CJL. Global, regional, and national comparative risk assessment of 79 behavioural, environmental and occupational, and metabolic risks or clusters of risks, 1990–2015: a systematic analysis for the Global Burden of Disease Study 2015. *Lancet* 2016; **388**: 1659–724.
- 4 Stevens GA, Alkema L, Black RE, *et al.* Guidelines for Accurate and Transparent Health Estimates Reporting: the GATHER statement. *Lancet* 2016; published online June 28.
- 5 Food, nutrition, physical activity and the prevention of cancer: a global perspective. Washington, D.C: World Cancer Research Fund & American Institute for Cancer Research, 2007.
- 6 Džeroski S, Ženko B. Is Combining Classifiers with Stacking Better than Selecting the Best One? *Machine Learning* 2004; **54**: 255–73.
- 7 Massey FJ. The Kolmogorov-Smirnov Test for Goodness of Fit. *Journal of the American Statistical Association* 1951; **46**: 68–78.
- 8 Law MR, Morris JK, Wald NJ. Use of blood pressure lowering drugs in the prevention of cardiovascular disease: meta-analysis of 147 randomised trials in the context of expectations from prospective epidemiological studies. *BMJ* 2009; **338**. DOI:10.1136/bmj.b1665.
- 9 Harris PA, Taylor R, Thielke R, Payne J, Gonzalez N, Conde JG. Research Electronic Data Capture (REDCap) - A metadata-driven methodology and workflow process for providing translational research informatics support. *J Biomed Inform* 2009; **42**: 377–81.
- 10 GBD 2015 Diseases and Injury Incidence and prevalence Collaborators. Global, regional, and national incidence, prevalence, and years lived with disability (YLDs) for 310 acute and chronic diseases and injuries, 1990–2015: a systematic analysis for the Global Burden of Disease Study 2015. *The Lancet Under review*.
- 11 An Integrative Metaregression Framework for Descriptive Epidemiology (Publications on Global Health, Institute for Health Metrics and Evaluation): Abraham D. Flaxman, Theo Vos, Christopher J.L. Murray, Patricia Kiyono: 9780295991849: Amazon.com: Books.  
<https://www.amazon.com/Integrative-Metaregression-Descriptive-Epidemiology-Publications/dp/0295991844> (accessed June 24, 2016).
- 12 Vasudevan S, Ramos F, Nettleton E, Durrant-Whyte H, Blair A. Gaussian Process modeling of large scale terrain. In: 2009 IEEE International Conference on Robotics and Automation. 2009: 1047–53.
- 13 Rasmussen CE, Williams CKI. Gaussian Processes for Machine Learning. Cambridge, Mass: The MIT Press, 2005.



- 14 Ng M, Freeman MK, Fleming TD, *et al.* Smoking Prevalence and Cigarette Consumption in 187 Countries, 1980-2012. *JAMA* 2014; **311**: 183–92.
- 15 Ng M, Freeman MK, Fleming TD, *et al.* Smoking prevalence and cigarette consumption in 187 countries, 1980-2012. *JAMA* 2014; **311**: 183–92.
- 16 Ng M, Fleming T, Robinson M, *et al.* Global, regional, and national prevalence of overweight and obesity in children and adults during 1980-2013: a systematic analysis for the Global Burden of Disease Study 2013. *Lancet* 2014; **384**: 766–81.
- 17 Vander Hoorn S, Ezzati M, Rodgers A, Lopez AD, Murray CJL. Estimating attributable burden of disease from exposure and hazard data. In: Comparative Quantification of Health Risks: Global and regional burden of disease attribution to selected major risk factors. World Health Organisation, 2004: 2129–40.
- 18 Preston SH. Causes and Consequences of Mortality Declines in Less Developed Countries during the Twentieth Century. In: Population and economic change in developing countries. Chicago: Univ. of Chicago Pr, 1980: 289–360.
- 19 Carnahan E, Lim SS, Nelson EC, *et al.* Validation of a new predictive risk model: measuring the impact of major modifiable risks of death for patients and populations. *The Lancet* 2013; **381**: S26.
- 20 Danaei G, Singh GM, Paciorek CJ, *et al.* The global cardiovascular risk transition: associations of four metabolic risk factors with national income, urbanization, and Western diet in 1980 and 2008. *Circulation* 2013; **127**: 1493–502, 1502e1-8.
- 21 Nieman DC, Brock DW, Butterworth D, Utter AC, Nieman CC. Reducing diet and/or exercise training decreases the lipid and lipoprotein risk factors of moderately obese women. *J Am Coll Nutr* 2002; **21**: 344–50.
- 22 Tjønnå AE, Lee SJ, Rognmo Ø, *et al.* Aerobic interval training versus continuous moderate exercise as a treatment for the metabolic syndrome: a pilot study. *Circulation* 2008; **118**: 346–54.
- 23 Snyder KA, Donnelly JE, Jacobsen DJ, Hertner G, Jakicic JM. The effects of long-term, moderate intensity, intermittent exercise on aerobic capacity, body composition, blood lipids, insulin and glucose in overweight females. *Int J Obes Relat Metab Disord* 1997; **21**: 1180–9.
- 24 Nordby P, Auerbach PL, Rosenkilde M, *et al.* Endurance training per se increases metabolic health in young, moderately overweight men. *Obesity (Silver Spring)* 2012; **20**: 2202–12.
- 25 Christiansen T, Paulsen SK, Bruun JM, Pedersen SB, Richelsen B. Exercise training versus diet-induced weight-loss on metabolic risk factors and inflammatory markers in obese subjects: a 12-week randomized intervention study. *Am J Physiol Endocrinol Metab* 2010; **298**: E824-831.
- 26 Coggan AR, Kohrt WM, Spina RJ, Bier DM, Holloszy JO. Endurance training decreases plasma glucose turnover and oxidation during moderate-intensity exercise in men. *J Appl Physiol* 1990; **68**: 990–6.

- 27 Arsenault BJ, Côté M, Cartier A, *et al.* Effect of exercise training on cardiometabolic risk markers among sedentary, but metabolically healthy overweight or obese post-menopausal women with elevated blood pressure. *Atherosclerosis* 2009; **207**: 530–3.
- 28 Chuang K-J, Yan Y-H, Chiu S-Y, Cheng T-J. Long-term air pollution exposure and risk factors for cardiovascular diseases among the elderly in Taiwan. *Occup Environ Med* 2011; **68**: 64–8.
- 29 Olofin I, McDonald CM, Ezzati M, *et al.* Associations of suboptimal growth with all-cause and cause-specific mortality in children under five years: a pooled analysis of ten prospective studies. *PLoS ONE* 2013; **8**: e64636.
- 30 McDonald CM, Olofin I, Flaxman S, *et al.* The effect of multiple anthropometric deficits on child mortality: meta-analysis of individual data in 10 prospective studies from developing countries. *Am J Clin Nutr* 2013; **97**: 896–901.
- 31 Das Gupta P. Standardization and Decomposition of Rates: A User's Manual. Washington D.C.: U.S. Bureau of the Census, 1993.
- 32 WHO report on the global tobacco epidemic, 2017: monitoring tobacco use and prevention policies. Geneva: World Health Organization, 2017.
- 33 Global Health Observatory data: Household air pollution. WHO [http://www.who.int/gho/phe/indoor\\_air\\_pollution/en/](http://www.who.int/gho/phe/indoor_air_pollution/en/).
- 34 Lelieveld J, Evans J, Fnais M, Giannadaki D, Pozzer A. The contribution of outdoor air pollution sources to premature mortality on a global scale. *Nature* 2015; : 367–71.
- 35 Takala J, Hamalainen P, Nenonen N, Takahashi K, Chimed-Ochir O, Rantanen J. Comparative Analysis of the Burden of Injury and Illness at Work in Selected Countries and Regions. *Central European Journal Occupational and Environmental Medicine* 2017; **23**: 6–32.
- 36 2016 ANNUAL REPORT WHO/UNICEF Joint Monitoring Programme for Water Supply, Sanitation and Hygiene (JMP). UNICEF.
- 37 Petry N, Olofin I, Hurrell RF, *et al.* The Proportion of Anemia Associated with Iron Deficiency in Low, Medium, and High Human Development Index Countries: A Systematic Analysis of National Surveys. *Nutrients* 2016; **8**. DOI:10.3390/nu8110693.

## Section 7. Methods on the attribution of deaths to causes

### 1 Introduction

The GBD determines what fraction of deaths are due to each cause of death. We estimate these *cause fractions* for every age, sex, location, and year. From this, we want to determine deaths due to causes on the same domains defined by age, sex, location, and year. We also want to aggregate these deaths over age ranges. For instance, given deaths from 5–9 and from 10–14, what are deaths from 5–14?

Some of the work at IHME uses mortality rate,  ${}_n m_x$ , and some uses mortality,  ${}_n q_x$ , so let's look at how each of those groups calculate consistent attribution of deaths.

Using actuarial notation,  ${}_n q_x$  is the probability of having died between ages  $x$  and  $x + n$ . In the language of probability, we would define a random variable,  $X$  for the age of a person and mortality is the  ${}_n q_x = P[X \leq x + n | X > x]$ . The various symbols are

|              |                                                            |
|--------------|------------------------------------------------------------|
| $x$          | The age at the start of the age interval                   |
| $n_x$        | The length of the age interval starting at age $x$         |
| $l_x$        | Period cohort population at start of age interval $x$      |
| ${}_n d_x$   | Number of deaths over the course of $n$ years from age $x$ |
| ${}_n q_x$   | Probability of having died between age $x$ and $x + n$     |
| ${}_n p_x$   | Probability of having survived from age $x$ to $x + n$     |
| $\chi_x$     | Fraction of deaths due to a specific cause, $c$            |
| ${}_n d_x^c$ | Deaths due to the cause $c$                                |

### 2 Solve as a Life Table

We know  ${}_n q_x$  and  $\chi_x$ . We want to compute  ${}_n d_x^c$ , but we also want to compute the sum of these deaths over sets of intervals, so we want, for instance,  ${}_{15} d_5$ , the deaths from age 5 to 20. Central computation thinks of this calculation as filling out a life table.

| $x$ | $l_x$               | ${}_n d_x$                   | ${}_n q_x$ | $\chi_x$ | ${}_n d_x^c$                        |
|-----|---------------------|------------------------------|------------|----------|-------------------------------------|
| 0   | $l_0 = 10^5$        | $l_0 {}_5 q_0$               | ${}_5 q_0$ | $\chi_0$ | $l_0 {}_5 q_0 \chi_0$               |
| 5   | $l_0(1 - {}_5 q_0)$ | $l_0(1 - {}_5 q_0) {}_5 q_5$ | ${}_5 q_5$ | $\chi_5$ | $l_0(1 - {}_5 q_0) {}_5 q_5 \chi_5$ |

Let's work through this as a series of substitutions. Deaths due to a cause are

$${}_n d_x^c = {}_n d_x \chi_x. \tag{1}$$

The number that die come from the number alive and the mortality, so this is

$${}_n d_x^c = l_x {}_n q_x \chi_x. \tag{2}$$

The number alive are those who survived since the last time period,  $l_x = l_{x-n} {}_n p_x$ , or you could say the number alive are those who survived since birth,  $l_x = l_0 {}_x p_0$  (survival from time 0 to time  $x$ ), so

$${}_n d_x^c = l_0 {}_x p_0 {}_n q_x \chi_x. \quad (3)$$

There is an identity that says surviving from 0 to 20 is equal to survival from 0 to 10 multiplied by survival from 10 to 20,

$${}_{20} p_0 = {}_{10} p_0 {}_{10} p_{10}, \quad (4)$$

so we say that survivals multiply. Here, that means

$${}_x p_0 = \prod_{s=0}^{s=x-n} {}_n p_s = \prod_{s=0}^{s=x-n} (1 - {}_n q_s), \quad (5)$$

where we substituted  ${}_n p_x = 1 - {}_n q_x$ . Now the deaths are

$${}_n d_x^c = l_0 {}_n q_x \chi_x \prod_{s=0}^{s=x-n} (1 - {}_n q_s). \quad (6)$$

That tells us what the value is, not the steps to compute it.

What does this look like for computation? Given a vector of  ${}_n q_x$  and a vector of  $\chi_x$ , we can make a cumulative product of  $(1 - {}_n q_x)$ , shift it one to the right, and then multiply them element-wise to get an array of results.

What if we want mortality due to a cause over a longer interval, such as  ${}_{45} q_{15}^c$ ? We can add the deaths and divide, but, if this is exactly what we want to compute, we can calculate it more directly. This value is defined as

$${}_{45} q_{15} = \frac{\sum_{x=15}^{x=40} {}_5 d_x}{l_{15}} \quad (7)$$

Each of the terms in the sum can be written in terms of  $l_{15}$ ,

$$\sum_{x=15}^{x=40} {}_5 d_x = l_{15} {}_5 q_{15} \chi_{15} + l_{15} {}_5 p_{15} {}_5 q_{20} \chi_{20} + l_{15} {}_5 p_{15} {}_5 p_{20} {}_5 q_{25} \chi_{25} + \dots \quad (8)$$

The  $l_{15}$  drops out

$${}_{45} q_{15}^c = {}_5 q_{15} \chi_{15} + {}_5 p_{15} {}_5 q_{20} \chi_{20} + {}_5 p_{15} {}_5 p_{20} {}_5 q_{25} \chi_{25} + \dots \quad (9)$$

As before, this can be written as the elementwise product of  ${}_n q_x$ ,  $\chi_x$ , and the cumulative product of  $(1 - {}_n q_x)$ .

### 3 Mortality Versus Mortality Rate

The calculation above used the mortality to do this calculation. Could we use the mortality rate instead? We can look at the derivation of cause fractions in order to figure this out.

Cause fractions are defined with *neither* the mortality nor the mortality rate. The cause fraction is a ration of hazards. Under the competing hazards framework, which Preston, Heuveline, and Guillot calls a multiple-decrement process, each possible cause of death has its own hazard rate,  $\lambda_c(x)$ . The cause fraction is the ratio of the hazard rate for one cause to the hazard rate for all causes,

$$\lambda_0(x) = \sum_c \lambda_c(x) \quad (10)$$

$$\chi_c = \frac{\lambda_c(x)}{\lambda_0(x)}. \quad (11)$$

This is an instantaneous quantity. In the work we do, we look at quantities calculated over whole age intervals, all of which are defined as integrals over the continuous quantity,  $\lambda(x)$ . The definitions for the case of a single cause of death,

$${}_n d_x = l_x \int_x^{x+n} \lambda(a) e^{-\int_x^a \lambda(s) ds} da \quad (12)$$

$${}_nq_x = \int_x^{x+n} \lambda(a) e^{-\int_x^a \lambda(s) ds} da \quad (13)$$

$${}_nm_x = \frac{{}_nq_x}{\int_x^{x+n} e^{-\int_x^a \lambda(s) ds} da} \quad (14)$$

The definitions for a single cause, in the presence of other causes, come from the theory of competing causes, or multiple-decrement processes, and are

$${}_nd_x^c = l_x \int_x^{x+n} \lambda_c(a) e^{-\int_x^a \lambda_0(s) ds} da \quad (15)$$

$${}_nq_x^c = \int_x^{x+n} \lambda_c(a) e^{-\int_x^a \lambda_0(s) ds} da \quad (16)$$

$${}_nm_x^c = \frac{{}_nq_x^c}{\int_x^{x+n} e^{-\int_x^a \lambda_0(s) ds} da} \quad (17)$$

where  $\lambda_0(x) = \sum_c \lambda_c(x)$ .

Adding all of the cause-specific mortalities together gives the same total mortality,

$$\sum_c {}_nq_x^c = \int_x^{x+n} \left( \sum_c \lambda_c(a) \right) e^{-\int_x^a \lambda_0(s) ds} da = \int_x^{x+n} \lambda_0(a) e^{-\int_x^a \lambda_0(s) ds} da = {}_nq_x. \quad (18)$$

Given that the  ${}_nq_x^c$  sum, so too must the  ${}_nm_x^c$  because they have  ${}_nq_x^c$  in the numerator and the same denominator. It follows that the ratio of cause-specific values to total values is the same for both,

$$\frac{{}_nm_x^c}{{}_nm_x} = \frac{{}_nq_x^c}{{}_nq_x} = \frac{{}_nd_x^c}{{}_nd_x} = \chi_x^c \quad (19)$$

on any interval, so we can use either to make our tables.

Hazard rates usually vary with respect to each other, so that the cause fraction of hazard rates varies within an age interval. The cumulative values for cause-specific mortality and mortality rate will, however, have the same fraction.

The only problem, then, is that  ${}_nm_x$  is not enough, by itself, to produce a life table. You would need  ${}_na_{x:}$  as well, in order to determine the total number of deaths.

## 4 Written As Probabilities

Actuarial notation can be obfuscatory. Let's look at it using probabilities because that might be more friendly for some reader. The continuous random variable  $X$  represents the time at which a member of the population dies. The survival is

$$S(x) = P[X > x]. \quad (20)$$

That's the same as  ${}_xp_0$ . The conditional survival is the probability of living to age  $x+n$ , given having lived to age  $x$ ,

$$S(x, x+n) = P[X > x+n | X > x]. \quad (21)$$

Because we've written this as a probability, we see that

$$S(x, x+n) = \frac{P[X > x+n]}{P[X > x]} = \frac{S(x+n)}{S(x)} \quad (22)$$

For death by multiple causes, there are two random variables, which we can choose to be  $X$ , the time of death and  $J$ , the cause of death. What we have called  ${}_nq_x^c$  is the probability of dying by cause  $J = c$  at interval  $(x, x+n)$ ,

$${}_nq_x^c = P[X \leq x+n, J = c | X > x] = P[X \leq x+n | X > x] P[J = c | X \leq x+n, X > x] \quad (23)$$

where we've broken the *and* into a marginal over  $X$  and a conditional on that marginal. The cause fraction is

$$\chi_c = P[J = c | x < X \leq x + n]. \quad (24)$$

The total probability of dying is

$${}_nq_x = P[X \leq x + n | X > x]. \quad (25)$$

Returning to the original problem, we are given  $\chi_x$  and  ${}_nq_x$ , so the cause-specific mortality is

$${}_nq_x^c = P[X \leq x + n, J = c | X > x] = {}_nq_x \chi_x, \quad (26)$$

according to Eq. 23. There is no need to include information from the previous time interval unless we want  ${}_nd_x = l_x {}_nq_x$ , in which case we need

$$l_x = l_0 P[X > x], \quad (27)$$

so that, in terms of the previous interval,

$$l_x = l_0 P[X > x - n] P[x - n < X \leq x] = l_{x-n} {}_np_x = l_{x-n} (1 - {}_nq_x). \quad (28)$$

## Section 8. Modeling specific methods on causes of death estimation

# Tuberculosis

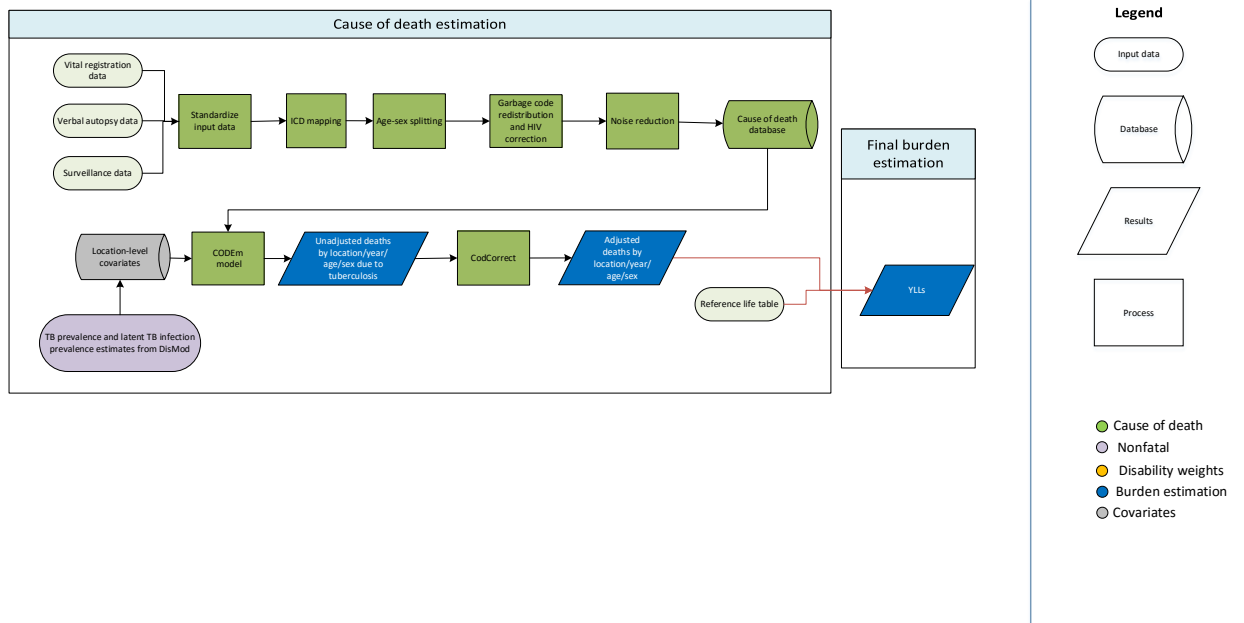

## Input data

Input data for modeling tuberculosis mortality among HIV-negative individuals include vital registration, verbal autopsy, and surveillance data. Vital registration data were adjusted for garbage coding (including ill-defined codes, and the use of intermediate causes) following GBD algorithms and misclassified HIV deaths (i.e., HIV deaths being assigned to other underlying causes of death such as tuberculosis or diarrhea because of stigma or misdiagnosis). This correction was done based on examining changes in the age pattern of diseases over time.

Verbal autopsy data in countries with age-standardized HIV prevalence greater than 5% were removed because of a high probability of misclassification, as verbal autopsy studies have poor validity in distinguishing HIV deaths from HIV-TB deaths.

## Modeling strategy

We changed the modeling strategy of tuberculosis in GBD2016 by first modeling prevalence of disease and prevalence of latent infection which were then used as covariates in the CODEm model. We dropped the health system access covariate and replaced it by the newly developed Healthcare Access and Quality Index covariate. We also added the adult underweight proportion covariate. Other location-level covariates included in the CODEm model were the same as in GBD 2015: alcohol (liters per capita), diabetes (fasting plasma glucose mmol/L), education (years per capita), lag-distributed income, indoor air pollution, outdoor air pollution, population density, smoking prevalence, sociodemographic status, and a summary exposure variable reflecting the average exposure to all of the risk factors.



# Multidrug-resistant tuberculosis, extensively drug-resistant tuberculosis, and drug-sensitive tuberculosis

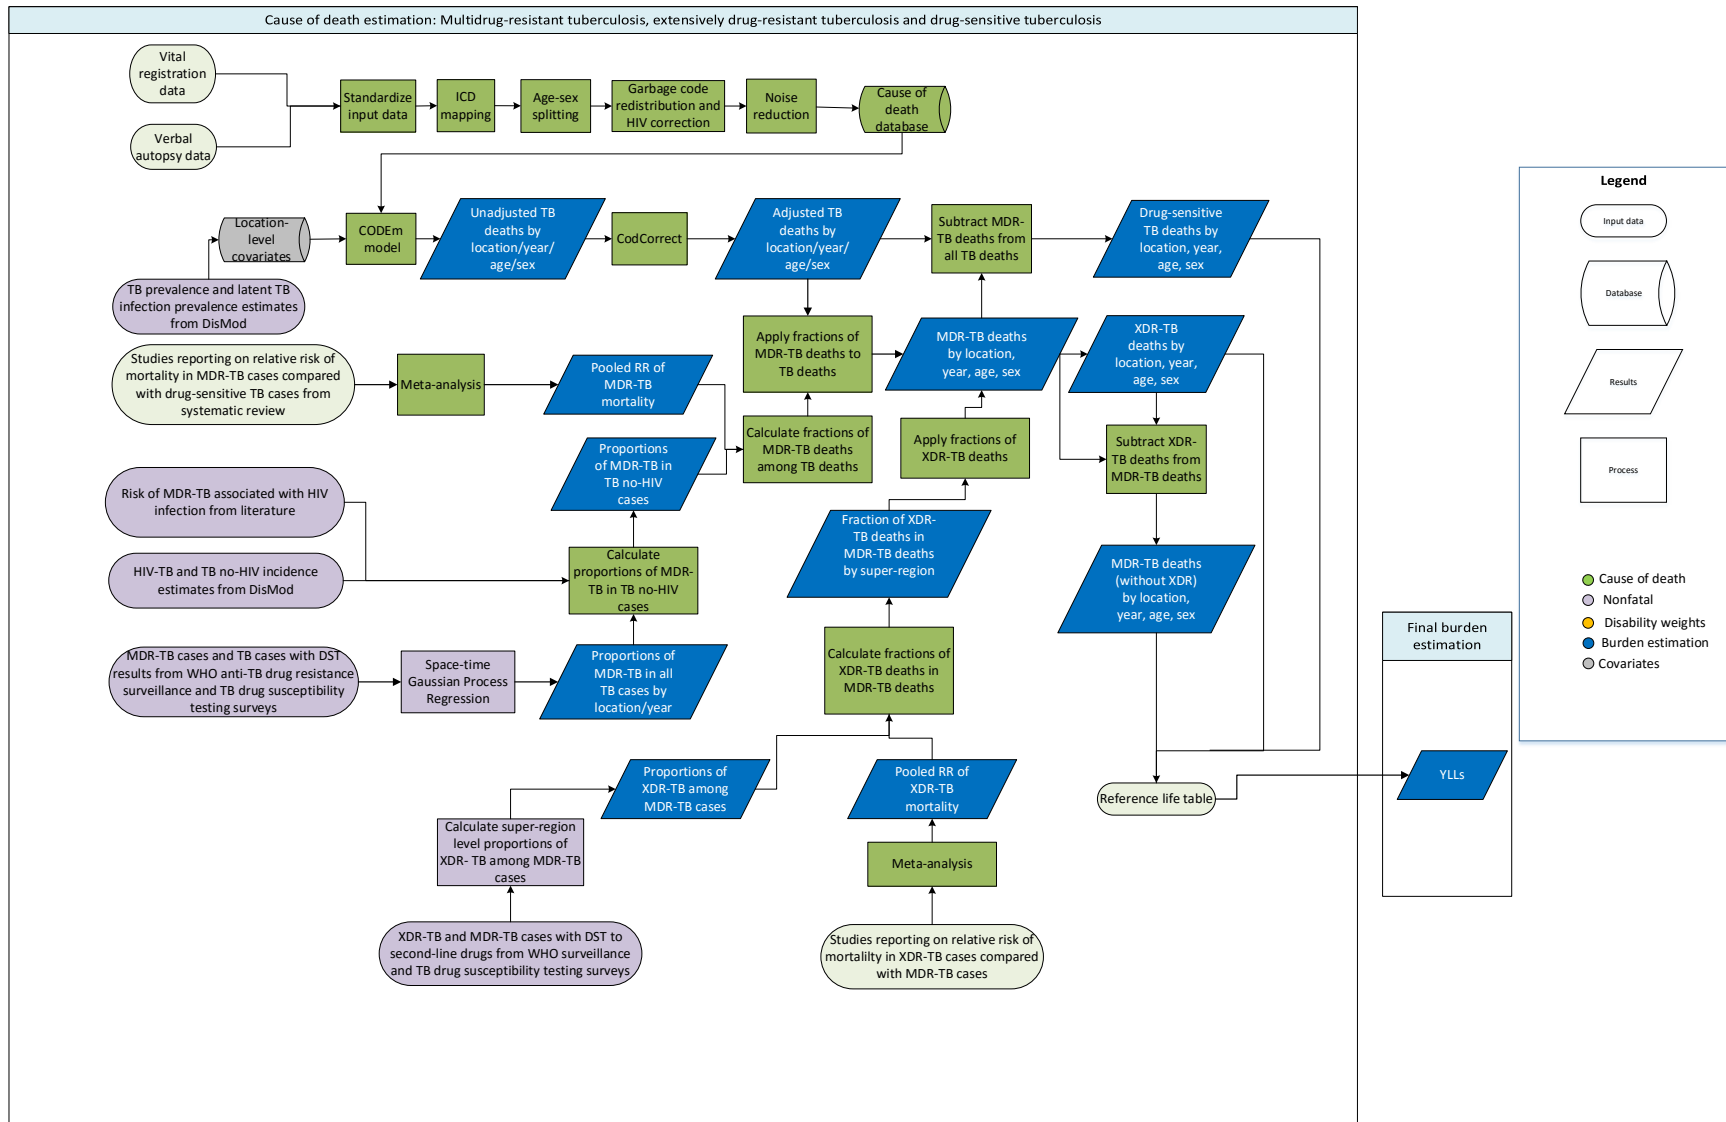

## Input data

Input data include: (i) the number of drug-resistant cases by type (multidrug-resistant tuberculosis [MDR-TB], extensively drug-resistant tuberculosis [XDR-TB], all TB cases with a drug sensitivity testing [DST] result for isoniazid and rifampicin, and MDR-TB cases with DST for second-line drugs) from routine surveillance and surveys reported to the World Health Organization, (ii) data from studies (identified through our systematic review) reporting on the relative risk of death in MDR-TB cases compared with non-MDR TB (drug-sensitive TB) cases, and the relative risk of death in XDR-TB cases compared with MDR-TB cases, and (iii) the risk of MDR-TB associated with HIV infection from the literature.<sup>1</sup>

## Modelling strategy

We conducted a systematic review and meta-analysis of studies reporting the relative risk of death in MDR-TB cases compared with drug-sensitive TB cases. We also ran a spatiotemporal Gaussian process regression to predict the proportions of MDR-TB cases among all TB cases for all locations and years. We computed the weighted average of the proportions of new and previously treated cases with MDR-TB, and used these as the input data for this regression. We then used the predicted proportions of MDR-TB, along with the HIV-TB and TB no-HIV incidence estimates (from our modeling of non-fatal TB), and the relative risk of MDR-TB associated with HIV infection from the literature<sup>1</sup> to compute the proportions of MDR-TB cases among HIV negative TB cases ( $P_{MDRnoHIVc,y,a,s}$ ) by location, year, age, and sex using the following formula:

$$P_{MDRnoHIVc,y,a,s} = \frac{MDR_{c,y}}{\left(1 + \left(RR_{HIV} \frac{HIVTB_{c,y,a,s}}{TBnoHIV_{c,y,a,s}}\right)\right) TBnoHIV_{c,y,a,s}}$$

where  $MDR_{c,y}$  is the number of all MDR-TB cases among HIV-positive and HIV-negative individuals by location and year,  $RR_{HIV}$  is the relative risk of MDR-TB associated with HIV infection,  $HIVTB_{c,y,a,s}$  is the number of HIV-TB incident cases by location, year, age, and sex, and  $TBnoHIV_{c,y,a,s}$  is the number of TB no-HIV incident cases by location, year, age, and sex.

We then computed the fraction of MDR-TB deaths among all HIV-negative TB deaths ( $D_{MDRnoHIVc,y,a,s}$ ) using the following formula:

$$D_{MDRnoHIVc,y,a,s} = \frac{P_{MDRnoHIVc,y,a,s} RR_{MDR}}{P_{MDRnoHIVc,y,a,s} RR_{MDR} + 1 - P_{MDRnoHIVc,y,a,s}}$$

where  $RR_{MDR}$  is the relative risk of death in MDR-TB cases compared with drug-sensitive TB cases. We then applied the predicted fractions of MDR-TB deaths among HIV-negative TB deaths to our CODEm TB death estimates to generate MDR-TB deaths by location, year, age, and sex. Next, we subtracted MDR-TB deaths from all TB deaths to generate drug-sensitive TB deaths by location, year, age, and sex.

To separate out XDR-TB from MDR-TB, we aggregated the XDR-TB cases and MDR-TB cases (with DST for second-line drugs) up to the super-region level and calculated the super-region level proportions of XDR-TB among MDR-TB cases. Next, we computed the super-region-specific fractions of XDR-TB deaths among all MDR-TB deaths ( $D_{XDRsr}$ ) using the following formula:

$$D_{XDRsr} = \frac{P_{XDRsr} RR_{XDR}}{P_{XDRsr} RR_{XDR} + 1 - P_{XDRsr}}$$

where  $P_{XDRsr}$  is the proportion of XDR-TB among MDR-TB cases for each super-region, and  $RR_{XDR}$  is the pooled relative risk of mortality in XDR-TB cases compared with MDR-TB cases. These fractions were then applied to MDR-TB deaths in corresponding countries within the super-regions to produce XDR-TB deaths by location, age, and sex for the most recent year of estimation. We linearly extrapolated XDR-TB mortality rates back assuming the mortality rates were zero in 1992, one year before 1993 when XDR-TB was first recorded in USA surveillance data.<sup>2</sup> Finally, we subtracted XDR-TB deaths from MDR-TB deaths to generate MDR-TB (without extensive drug resistance) deaths by location, year, age, and sex.

## Reference

1. Mesfin YM, Hailemariam D, Biadglign S, Kibret KT. Association between HIV/AIDS and multi-drug resistance tuberculosis: a systematic review and meta-analysis. PLoS One. 2014;9(1):e82235.
2. Centers for Disease Control and Prevention (CDC). Extensively Drug-Resistant Tuberculosis --- United States, 1993—2006. MMWR. 2007; 56(11);250-253

# HIV/AIDS

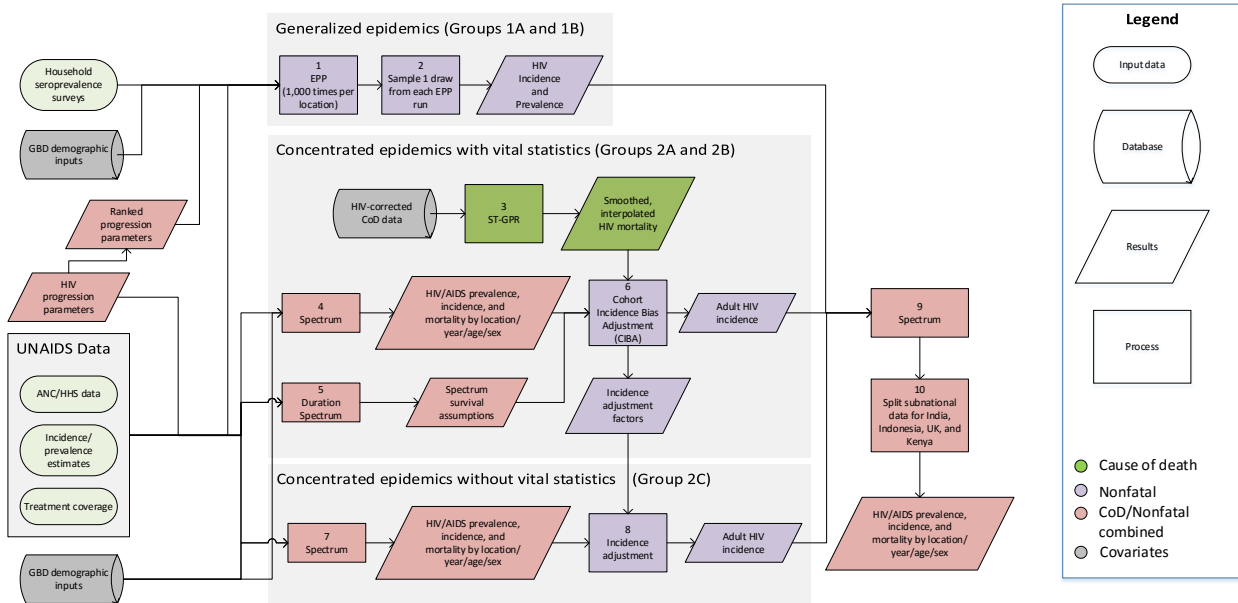

## Input data

### Household seroprevalence surveys

Geographically representative HIV seroprevalence survey results were used as inputs to the model for countries with generalized HIV epidemics where available.

### GBD demographic inputs

Location-specific population, fertility, and HIV-free survival rates from GBD 2016 and migration data from UNAIDS were used as inputs in modeling all locations.

### UNAIDS data

Antenatal care, incidence, prevalence, and treatment coverage data from UNAIDS were used in modeling for all locations.

### On-ART literature data

Data were identified by using search terms “HIV,” “mortality,” and “antiretroviral therapy” in PubMed searches across the literature. To be included, studies must include only HIV-positive people who receive antiretroviral therapy (ART) but who were ART-naïve prior to the study. In addition, studies must report either a duration-specific mortality proportion or a hazard ratio across age or sex, and must not include children.

For duration-specific survival data, studies must report uncertainty on mortality estimates or provide stratum-specific sample sizes and must include duration-specific data to allow for calculation of 0-6, 7-12, or 13-24 month conditional mortality. In addition, studies must either report separate mortality and loss-to-follow-up (LTFU) curves, be corrected for LTFU using vital registration data, or be conducted in a

high-income setting. Finally, studies must report the percent of participants who are male, the median age of participants, and either data with specific data on the number of CD4 T lymphocytes (CD4 counts) or the median CD4 count used for the data.

Hazard ratio data for ages or sexes can only be used if the hazard ratios are controlled for other variables of interest (age, sex, and CD4 category).

#### Changes for GBD 2016

In GBD 2013, we identified 102 papers for extraction. For GBD 2015, we included 13 additional studies informing the duration-specific mortality estimation process and 26 studies informing the age and sex hazard ratio estimation process (some studies were used and counted in both). We also added one study to our LTFU analysis. For GBD 2016, we included 12 additional studies informing the duration-specific mortality estimation process and 11 studies informing the age and sex hazard ratio estimation process (some studies were used and counted in both).

#### Off-ART literature data

In GBD 2013, to characterize uncertainty in the progression and death rates, we systematically reviewed the literature on mortality without ART. We searched terms related to pre-ART or ART-naive survival since seroconversion.<sup>1</sup> After screening, we identified 13 cohort studies that included the cohorts used by UNAIDS from which we extracted survival at each one-year point after infection. Screening for additional, recently published studies in GBD 2015 and GBD 2016 identified no new cohort studies for inclusion in this analysis.

#### Burden estimation

The files compiled by UNAIDS for their HIV/AIDS estimation process were our main source of data for producing estimates of HIV burden. These files are typically country-specific and contain both demographic data (population, fertility, migration, and HIV-free survival rates) and HIV-specific information. In all cases except migration, we substituted in our own, internally consistent demographic estimates. The HIV-specific information includes what is needed to run both the Spectrum and Estimation and Projection Package (EPP) models. Spectrum requires data on AIDS mortality among people living with HIV with and without ART, CD4 progression among people living with HIV not on ART, ART coverage among adults and children, coverage of breastfeeding among women living with HIV, prevention of mother-to-child transmission coverage, and CD4 thresholds for treatment eligibility. EPP uses many of the same assumptions as Spectrum but fits a simpler model to HIV prevalence data from surveillance sites and large household surveys. We extracted all of these data from UNAIDS' proprietary formats.

For GBD 2016, we received national level files for 81 countries and subnational level files for 6 countries. For many of the missing countries, we had UNAIDS files from the previous estimation process, which we used again. After combining, we were left with a set of 42 countries for which we had never received a UNAIDS file, many of them countries with small populations and/or lower HIV prevalence. In those places, we generated regional averages of all needed inputs. This enabled us to run Spectrum for every GBD location.

In several cases, we have modified the structure or data in the UNAIDS files. In South Africa, which has been estimated at the province level since GBD 2015, we split the national-level UNAIDS file into nine provincial datasets. We used GBD 2016 demographic inputs for the provinces. These provinces are

already fit as separate subpopulations in EPP, so we extracted the prevalence data for the individual provinces and assumed national rates for all other Spectrum inputs. In some locations that are estimated only at the national level in GBD 2016, we received subnational files from UNAIDS. In these cases, we split GBD 2016 demographic input data using the subnational relative relationships found in the UNAIDS files. Additionally, we identified that the ratio of fertility in HIV-positive women to HIV-negative women was negative in Indonesia. We used linear extrapolation to replace this value.

We used all available sources of vital registration and sample registration data from the GBD Causes of Death database after garbage code redistribution and HIV/AIDS mis-coding correction, except in Group 1A countries as described below.<sup>2,3</sup> There are two different cause of death data sources for HIV/AIDS in China: the Disease Surveillance Point (DSP) system and the Notifiable Infectious Disease Reporting (NIDR) system. Both systems are administered by the Chinese Center for Disease Control and Prevention, but the reported number of deaths due to HIV is significantly lower in DSP. Therefore, we have used the provincial-level ratio of deaths due to HIV/AIDS from NIDR to those from DSP, choosing the larger ratio between years 2013 and 2014, and scaled the reported deaths in the DSP system, which is in turn used in the Space-Time Gaussian Process Regression (ST-GPR) process.

#### Modeling strategy

In GBD 2016, our general modeling strategy for estimating HIV incidence, prevalence, and mortality is very similar to the strategy used in GBD 2015. We continue to use the Spectrum program rewritten in Python for GBD 2013 to facilitate faster and more flexible execution necessary for our more intensive computational needs. We made several changes to Spectrum's assumptions comparing to the Spectrum software used by UNAIDS. We also again ran EPP using an open-source computer program in R written by Jeffrey Eaton.<sup>4</sup> We ran EPP for all Group 1 countries in order to produce incidence and prevalence estimates that were consistent with the demographic and epidemiological assumptions used in GBD 2016.

#### On-ART

First, we corrected reported probabilities of death for loss to follow-up using an update of the approach developed by Verguet and colleagues.<sup>5</sup> Verguet and colleagues used tracing and follow-up studies to empirically estimate the relationship between death in LTFU and the rate of LTFU.

To create estimates of age-specific hazard ratios, we synthesized hazard ratio data in five broad age groups: 15-25, 25-35, 35-45, 45-55, 55-100, and modeled the data using DisMod-MR 2.0.

To create estimates of sex-specific hazard ratios, we use the *metan* function in Stata to create estimates of relative risks separately by region, using female age groups as the reference group.

The age and sex hazard ratios were applied to the study level mortality rates, accounting for the distribution of ages and sexes in the mortality data. We then subtracted HIV-free mortality from the model life table process to calculate study level age-sex HIV-specific mortality.

We used DisMod-MR 2.0 to synthesize the age-sex split study level data into estimates of conditional probability of death over initial CD4 count.<sup>1</sup> We modeled the data separately by duration, age, and sex and added a fixed effect on whether the study was conducted prior to 2002. We estimated all three regions together using a fixed effect for each region.

## Changes for GBD 2016

In GBD 2016, we chose to age-sex split the data at the study level so that we could consider study-specific age-sex distributions, whereas previous GBD iterations relied upon region-specific distributions. We also subtracted study-specific HIV-free mortality rather than region-specific HIV-free mortality. Another change was a switch to estimating all regions together with fixed effects for each region. This allowed us to impart a CD4 trend in sub-Saharan Africa and other developing country estimates that led to more realistic estimates in the high CD4 categories where little data was available from those regions.

Another methods change for GBD 2016 was the distribution of ART coverage by age, sex, and CD4 count. We used two AIDS Indicator Surveys (Kenya 2012 and Uganda 2011) to predict the age-sex-CD4 distribution of ART coverage and applied those distributions to the input counts of people receiving ART in Spectrum. This shifted the coverage distribution to groups with higher CD4 counts, as was seen in the data.

## Off-ART

Following UNAIDS assumptions, no-ART mortality is modeled as shown in the figure below.<sup>1</sup>

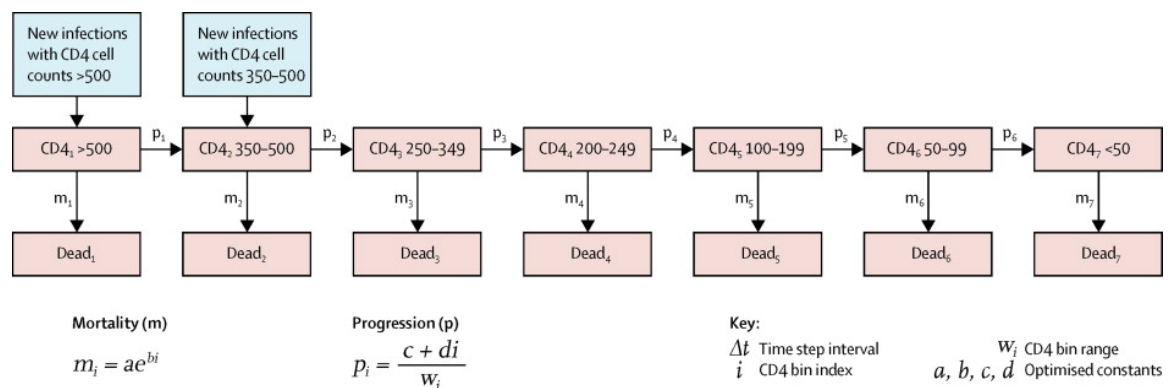

The death and progression rates between CD4 categories vary by age according to four age-groups, 15–24 years, 25–34 years, 35–44 years, and 45 years or older. We modeled the logit of the conditional probability of death between years in these studies using the following formula:

$$\text{logit}(m_{ijt}) = \beta_0 + \sum_{i=1}^4 \beta_{1i} a_i + \sum_{j=1}^{12} \beta_{2j} t_j + u_k + \epsilon_{ijt}$$

In the formula,  $m$  is conditional probability of death from year  $t_j$  to  $t_{j+1}$ ,  $a_i$  is an indicator variable for age group at seroconversion (15–24 years, 25–34 years, 35–44 years, and 45 years or older),  $t_j$  is an indicator variable of year since seroconversion, and  $u_k$  is a study-level random effect.

By sampling the variance-covariance matrix of the regression coefficients and the study-level random effect, we generated 1,000 survival curves for each age group that capture the systematic variation in survival across the available studies. For each of the 1,000 survival curves, we use a framework modeled after the UNAIDS optimization framework in which we find a set of progression and death rates that minimizes the sum of the squared errors for the fit to the survival curve.<sup>6,7</sup>

## Burden estimation overview

UNAIDS uses two key analytical components in their epidemiological estimation. EPP is used to estimate incidence trajectories that are consistent with prevalence surveys and other prevalence measurements such as antenatal clinic serosurveillance. Spectrum is a compartmental HIV progression model used to

generate age-specific incidence, prevalence, and death rates from the EPP incidence curves and assumptions about intervention scale-up and local variation in epidemiology.

For GBD 2013, we created a replica of Spectrum in Python. This enabled us to run thousands of iterations of the model at once on our computing cluster and allowed for more flexible input data structures. Additionally, in order to generate estimates with more realistic ranges of uncertainty than those in UNAIDS 2012, we adjusted all input data by uniformly sampled factors between 0.9 and 1.1. These changes, along with our new estimation of on- and off-ART mortality and CD4 progression parameters, persist into GBD 2016.

Due to the substantial differences in the quality and types of data available across different countries, we used three different methodologies to produce year-, age-, and sex-specific estimates of HIV incidence, prevalence, and mortality.

Countries with high HIV prevalence and available seroprevalence surveys or antenatal clinic data (Groups 1A and 1B)

We identified 50 countries – as well as subnational locations in India, Kenya, and South Africa – with at least 0.5% adult HIV prevalence and at least one geographically representative HIV seroprevalence survey or available antenatal care clinic (ANC) data. In order to ensure that our estimates of incidence and prevalence in these places were consistent with our estimates of HIV progression, we used a version of EPP written in R and C++ by Jeffrey Eaton to create new fits to the available prevalence data. The version of EPP used in GBD 2016 was an updated release from Jeffrey Eaton since completion of GBD 2015. In this new version, an ANC prevalence adjustment was included and incorporated with the 2016 lookup database and an additional parameter to estimate ANC variance inflation was included as well. In the ANC bias adjustment, instead of using the default universal assumption of the prior mean and standard deviation (SD) of the distribution that the adjustment follows, we selected the parameters based on each sub-population (general population and high risk population) in each location. For sub-populations with prevalence survey data, we used the default assumption with mean=0.15 and SD=1. For subpopulations without prevalence survey data, we chose the region/epidemic specific mean and SD based on the median probit difference and probit difference SD in Table 1 of Marsh et al.<sup>8</sup>

India's HIV epidemic is classified as concentrated in specific subpopulations rather than generalized to the full population, and only one prevalence survey, the 2005-2006 National Family Health Survey (NFHS-3), was available, so we used modified parameters for Indian states in EPP. We first calculated the mean of the median probit difference between men and women for "Countries with concentrated epidemics" in Table 1 of March et al as mentioned above, which was 0.245. Then we derived empirical parameters based on the difference between the ANC data and the NFHS-3 survey data in probit space to use for the general population. Specifically, we calculated the probit difference by taking the median of all raw ANC prevalence in years 2004 through 2006 and comparing to the 2005 prevalence survey data in probit space for three states with large HIV epidemics: Andhra Pradesh, Karnataka, and Maharashtra. From this empirical parameter derivation, we got the mean and SD value based on the three states as 0.124 and 0.051, respectively. We then used linear interpolation between the prevalence with a prior of 0.245 and the new prior of 0.124 to recalculate the mean and keep the SD the same as the empirical estimates. The final assumption of the prior mean and SD were 0.182 and 0.051, respectively. We did not make any adjustments for high risk populations.



In the new version of EPP, in addition to the equilibrium prior assumption of the force of infection in projection, a random walk approach is available as an alternative method. For locations with two or more prevalence surveys and a declining trend between the mean of the most recent two surveys, the random walk approach was chosen to project the force of infection. We assumed the change of the log scaled force of infection was following a normal distribution with mean equal to the median of the change of the modeled force of infection among the years having ART implemented or prevalence data, and the SD was equal to the default setting as the mean SD of the change of the modeled force of infections among the years having prevalence data. The projection year was chosen from the most recent year between the year with the lowest model force of infection and the year of the second latest survey data.

For Indian states, we used the equally weighted draw-level estimates of the equilibrium prior and random walk assumptions since we had no further information to support either assumption for each state. Here, the projection year of the random walk was the year with the lowest modeled force of infection because no locations had more than one prevalence survey, and the assumption of increasing ART coverage was supported by the data available to us.

In the new EPP code, an optimization step was added into IMIS function to speed up the parameter sampling step based on Raftery and Bao<sup>9</sup>. Two optimization methods have been introduced. The main algorithm is Broyden–Fletcher–Goldfarb–Shanno (BFGS) optimization. If BFGS fails, Nelder-Mead optimum is used instead. In our 2016 EPP model, by substituting in our own assumptions about HIV progression rates and on/off ART mortality, we were able to ensure that the implied relationship between incidence and mortality/prevalence in EPP is similar to that in Spectrum.

In Group 1 locations, we expect estimates of HIV burden to exhibit substantial uncertainty. To reflect this, we induced a perfect correlation between the previously independent draws of HIV mortality with and without ART and CD4 progression. We paired the draws of the three parameter sets internally and with each other in the following way: we sorted without-ART mortality and CD4 progression internally by age (not CD4), meaning the highest draw of HIV mortality without ART for age  $a_i$  and CD4 category  $c_i$  will be paired with the highest draw of HIV mortality without ART for age  $a_k$  and CD4 category  $c_i$ . In the same way, we sorted with-ART mortality internally by age, sex, CD4 count at treatment initiation, and duration on treatment. After this sorting process, the lowest indexed draw of each parameter has the highest values and vice versa. This means that we will use the most extreme possible parameter sets in EPP and Spectrum and should see a commensurate expansion in the range of the uncertainty.

To ensure that this expanded uncertainty is replicated in EPP, we fit the model once for every set of paired draws of the progression parameters for every location. This means that the first iteration of EPP for Uganda sees the highest draws of all three sets of progression parameters. Such a procedure is necessary because EPP currently has no mechanism for incorporating uncertainty in any inputs except prevalence data. This process (Process 1 in the HIV/AIDS Estimation Flowchart), produced 1,000 sets of EPP output for each of the locations that make up the 48 countries in the group. Every set of EPP outputs contains 500 consistent draws of HIV incidence and prevalence in adults aged 15-49. In many cases, the algorithm used to fit EPP, incremental mixture importance sampling, failed, resulting in fewer than 1,000 sets of EPP results.

For every location in the group, we sampled one of the 500 incidence/prevalence draws from each of the sets of EPP results (Process 2 in the HIV/AIDS Estimation Flowchart). By sampling one draw from

each set, we ensured that the distribution of progression parameters dictating the relationship between incidence and prevalence was exactly the same as the distribution of the sorted parameters generated in the previous step. In locations where not all 1,000 iterations of EPP fit successfully, we sampled one draw from every iteration that did succeed and then resampled with replacement from that set of draws. To maintain the link between the input progression draws and the resulting incidence and prevalence draws from EPP, we replaced any parameter draw associated with a failed run of EPP with the parameter draw that that failed draw was replaced with. At the end of this process, for every location in the set of 48 countries, we were left with 1,000 linked draws of adult incidence and prevalence and the exact progression parameters that generated those draws.

We then ran these results, along with the previously described demographic and HIV-specific inputs, through Spectrum to produce location-, year-, age-, and sex-specific estimates of HIV incidence, prevalence, and mortality (Process 9 in the HIV/AIDS Estimation Flowchart).

Countries with vital registration data (Group 2A and 2B)

Vital registration is one of the highest-quality sources of data on HIV burden in many countries, so generating estimates that are consistent with these data, with necessary adjustment to account for any potential underreporting, is critical. We identified 114 countries – as well as 440 subnational locations from Brazil, China, Japan, Indonesia, Mexico, Sweden, the United Kingdom, and the United States – with at least two usable points of vital registration data, verbal autopsy data, or sample registration system data such as DSP in China.

We imputed missing years of data to generate a complete time series for HIV from the estimated start year of the epidemic using ST-GPR. We analyzed mortality trends using ST-GPR starting in 1981, the year that HIV was first identified in the United States.<sup>10</sup> For ST-GPR, we adjusted the lambda (time weight) and GPR scale according to the completeness of vital registration data, with 4- and 5-star quality VR using parameters designed to follow the data more closely. We produced separate splines by country/age group, up to the peak year of death rate. We then ran a linear regression with random effects on region, age, and sex. Following this, we ran space-time residual smoothing, in which time, age, and space weights are used to inform smoothing of the residuals between data points and the linear regression estimate. From this process, we generated space-time estimates with the applied weights, along with the median absolute deviation (MAD) of the space-time estimates from the data. The MAD was calculated at various levels of the geographic hierarchy (e.g., subnational and national), and was added into the data variance term. The data variance and space-time estimates were then analyzed using Gaussian Process Regression to return a final estimate of mortality along with uncertainty.

Although Spectrum produces HIV mortality estimates that are within the realm of possibility in most countries using the incidence curves provided in the UNAIDS 2012/2015 country files, it is a deterministic model that has not yet been integrated into an optimizable framework. Therefore, in order to “fit” it to vital registration data, we need to adjust input incidence.

To improve the fit of this process, in GBD 2015, we restructured Spectrum to add compartments that identify groups of people living with HIV by year of infection (Process 5 in the HIV/AIDS Estimation Flowchart). With this version of Spectrum we can output, among many other metrics, HIV deaths by year, age, sex, and infection cohort. This enables us to adjust incidence to fit to death much more precisely and without making any rigid assumptions about the time from HIV infection to HIV death.

We incorporated these improvements into a cohort incidence bias adjustment (CIBA) process. First, we ran Spectrum normally to produce 1,000 draws of incidence, prevalence and mortality (Process 4 in the HIV/AIDS Estimation Flowchart). Then, by year, age, and sex, we took the ratio of VR deaths to Spectrum deaths to quantify the amount of bias in Spectrum. Using the mean duration data from the new version of Spectrum, for every year-, age-, and sex-specific infection cohort, we calculated the share of all HIV deaths observed over the course of the projection period in that cohort that would occur in each year after the year of infection. For example, projecting from 1970 through 2015, we identified the cohort of men infected in 1992 at the age of 16, calculated the total number of HIV deaths in that cohort in all subsequent years through the end of 2015, and divided the annual number of deaths by that total. This showed us the distribution of deaths among that cohort over the projection period. In the most extreme case (infections in 2014), we could only produce one point of that distribution (2015), so that single value is exactly 1.0; 100% of the deaths observed in that cohort occurred in 2015.

We then used these distributions of death to weigh the ratio of VR deaths to Spectrum deaths, meaning that ratios in the years where we expect the largest share of deaths were weighed most heavily. We then multiplied the initial size of that cohort from the normal run of Spectrum by the sum of the combined ratios to get a new estimate of new cases in that year/age/sex combination.

We can write this method mathematically in the following way:

$$r_t = \frac{VR_t}{D_t}$$

$$\rho_t^{t-i} = \frac{d_t^{t-i}}{\sum_{k=t-i+1}^n d_k^{t-i}}$$

$$\alpha^{t-i} = \sum_{k=t-i+1}^n r_k * \rho_k^{t-i}$$

$$n_{\text{adjusted}}^{t-i} = \alpha^{t-i} * n^{t-i}$$

$VR_t$  is the number of HIV/AIDS deaths in year  $t$  from ST-GPR, and  $D_t$  is the number of HIV/AIDS deaths from the first run of Spectrum. In the second equation,  $d_t^{t-i}$  is the number of HIV/AIDS deaths among members of infection cohort  $t - i$  in year  $t$ , with  $i \geq 1$ , from the new, duration-tracking version of Spectrum, and  $n$  is final year of the projection. Therefore,  $\rho_t^{t-i}$  is the share of observed deaths in cohort  $t - i$  that we expect to occur in year  $t$ . It follows, that  $\alpha^{t-i}$  is the weighted adjustment ratio described above, which we multiply by the estimated initial size of infection cohort  $t - i$  as calculated in the first stage Spectrum run to get the adjusted number of new cases,  $n_{\text{adjusted}}^{t-i}$ . This process is run separately for every sex and single-age pair.

CIBA (Process 6 in the HIV/AIDS Estimation Flowchart) allows ratios in each year after a given infection year to influence the final adjustment to incidence. The size of that influence is determined by the relative importance of that year in the cohort-year's distribution of deaths over time. The result is a new set of 1,000 draws of incidence and a set of 1,000 ratios of post-adjustment incidence to pre-adjustment incidence. We perform this adjustment using mean durations from the new version of Spectrum in order to try to shift the mean of the regular distribution of deaths.

Finally, to produce location-, year-, age-, and sex-specific estimates of HIV incidence, prevalence and mortality, we ran the new estimates of incidence and all previously input data through Spectrum (Process 9 in the HIV/AIDS Estimation Flowchart).

Countries without survey data and vital registration data (Group 2C)

The remaining 31 countries – as well as 14 subnational locations from China and Saudi Arabia – had neither geographically representative seroprevalence surveys nor reliable vital registration systems. To produce estimates of HIV burden in these countries, we assumed that Spectrum is similarly biased as in other Group 2 countries. This involved running Spectrum (Process 7 in the HIV/AIDS Estimation Flowchart), adjusting incidence using 1,000 adjustment ratios randomly sampled from the entire set of CIBA results (Process 8), and rerunning Spectrum using the new draws of adjusted incidence (Process 9). As above, the estimates of incidence, prevalence, and mortality were incorporated into the rest of the machinery via the reckoning process.

Subnational splitting and aggregation

Spectrum results for India, Kenya, Indonesia, and UK subnational locations are modeled at higher levels of geography than our GBD locations. Spectrum results for India are produced at the state level, while GBD 2016 estimates were produced at the state urban-rural level; Spectrum models Kenya provinces, while we compute Kenyan estimates for 47 counties. Indonesia and the United Kingdom have Spectrum results at the national level, while GBD 2016 estimates Indonesian provinces and Upper Tier Local Authorities in the UK. To split the Spectrum results into more granular results for processing, we assign each GBD subnational unit to a Spectrum modeling unit. From this, we generate age/sex/year-specific proportions for population, HIV-specific death, and HIV-free mortality.

In Cote d'Ivoire, Haiti, Moldova, Mozambique, and Zimbabwe, the country files that we received from UNAIDS contained only subnational data without national-level aggregates. In these locations, we generated GBD 2016 demographic inputs for the provided subnational units using the proportions present in the UNAIDS files and ran the locations through EPP and Spectrum at the subnational level before aggregating to generate final national level GBD 2016 estimates.

Limitations

We have not incorporated sex-specific allocation of ART in children under-5 for this round, though we did use sex-specific coverage for adults. The age- and sex-specific distributions of ART coverage we used were generated from two AIDS Indicator Surveys and can be expanded upon in future iterations of the GBD study.

HIV/AIDS resulting in other diseases

There are two Level 4 causes under the HIV/AIDS Level 3 cause in the GBD 2015 cause hierarchy. The modeling process for HIV/AIDS-tuberculosis is detailed in a separate part of this appendix. We computed deaths for HIV resulting in other diseases by subtracting HIV/AIDS-tuberculosis deaths from all HIV deaths at the 1,000 draw level.

## References

- 1 Murray CJL, Ortblad KF, Guinovart C, *et al.* Global, regional, and national incidence and mortality for HIV, tuberculosis, and malaria during 1990–2013: a systematic analysis for the Global Burden of Disease Study 2013. *The Lancet* 2014; **384**: 1005–70.
- 2 Global, regional, and national age–sex specific all-cause and cause-specific mortality for 240 causes of death, 1990–2013: a systematic analysis for the Global Burden of Disease Study 2013. *The Lancet* 2015; **385**: 117–71.
- 3 Birnbaum JK, Murray CJ, Lozano R. Exposing misclassified HIV/AIDS deaths in South Africa. *Bull World Health Organ* 2011; **89**: 278–85.
- 4 jeffeaton/epp. GitHub. <https://github.com/jeffeaton/epp> (accessed April 21, 2016).
- 5 Verguet S, Lim SS, Murray CJL, Gakidou E, Salomon JA. Incorporating Loss to Follow-up in Estimates of Survival Among HIV-Infected Individuals in Sub-Saharan Africa Enrolled in Antiretroviral Therapy Programs. *J Infect Dis* 2013; **207**: 72–9.
- 6 Ghys PD, Zaba B, Prins M. Survival and mortality of people infected with HIV in low and middle income countries: results from the extended ALPHA network. *AIDS* 2007; **21 Suppl 6**: S1–4.
- 7 Hallett TB, Zaba B, Todd J, *et al.*, ALPHA Network. Estimating incidence from prevalence in generalised HIV epidemics: methods and validation. *PLoS Med* 2008; **5**: e80.
- 8 Marsh K, Mahy M, Salomon JA, Hogan DR. Assessing and adjusting for differences between HIV prevalence estimates derived from national population-based surveys and antenatal care surveillance, with applications for Spectrum 2013. *AIDS* 2014; **28 Suppl 4**: S497–505.
- 9 Raftery AE, Bao L. Estimating and Projecting Trends in HIV/AIDS Generalized Epidemics Using Incremental Mixture Importance Sampling. *Biometrics* 2010; **66**: 1162–73.
- 10 CDC. Pneumocystis Pneumonia --- Los Angeles. MMWR Weekly. 1981; published online June 5. [http://www.cdc.gov/mmwr/preview/mmwrhtml/june\\_5.htm](http://www.cdc.gov/mmwr/preview/mmwrhtml/june_5.htm) (accessed April 21, 2016).
- 11 Brown T, Peerapatanapokin W. The Asian Epidemic Model: a process model for exploring HIV policy and programme alternatives in Asia. *Sex Transm Infect* 2004; **80 Suppl 1**: i19–24.

# Multidrug-resistant HIV/AIDS-tuberculosis, extensively drug-resistant HIV/AIDS-tuberculosis and drug-sensitive HIV/AIDS-tuberculosis

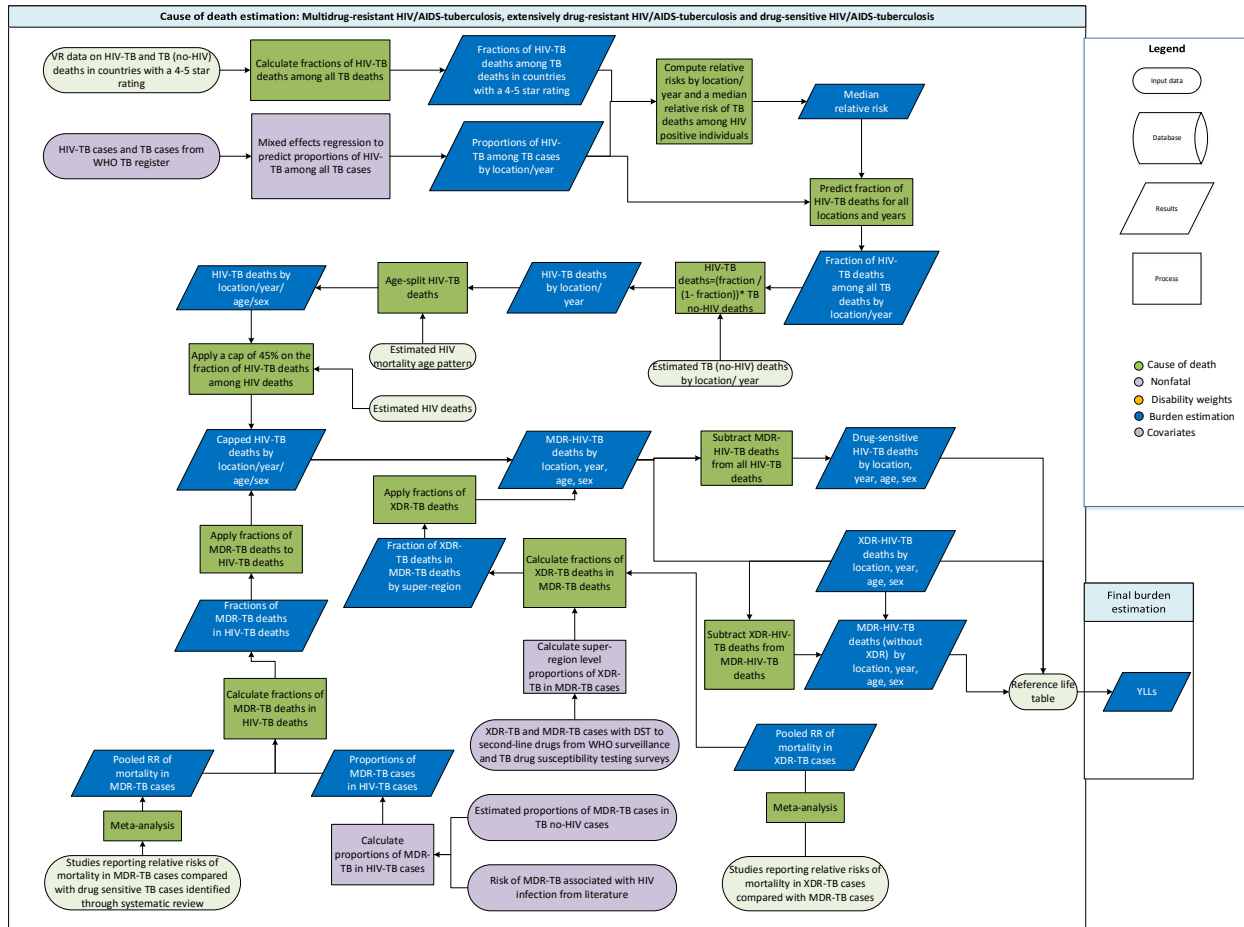

## Input data

Input data for HIV/AIDS-tuberculosis (HIV-TB) mortality estimation include (i) 382 site-years of vital registration data from countries with a four or five-star rating where cause of death data for directly coded HIV-TB and tuberculosis (TB) were available, and (ii) the number of TB cases (new and re-treatment) recorded as HIV-positive and the number of TB cases (new and re-treatment) with an HIV test result recorded in the TB register from the World Health Organization (WHO). We excluded data from countries with ten HIV-TB deaths or less. We also excluded data that were largely conflicting with the majority of data for other years from the same country.

Input data for estimation of multidrug-resistant and extensively drug-resistant HIV-TB include: (i) the number of drug-resistant cases by type (multidrug-resistant tuberculosis [MDR-TB], extensively drug-resistant tuberculosis [XDR-TB], all TB cases with a drug sensitivity testing [DST] result for isoniazid and rifampicin, and MDR-TB cases with DST for second-line drugs) from routine surveillance and surveys reported to the World Health Organization. Additional input data include relative risks of mortality in MDR-TB cases compared with drug sensitive TB cases, and relative risks of mortality in XDR-TB cases

compared with MDR-TB cases reported by studies identified through our systematic review, and the risk of MDR-TB associated with HIV infection from the literature.<sup>1</sup>

### Modelling strategy

To determine TB deaths in HIV-positive individuals, we first computed the fraction of HIV-TB deaths among all TB deaths using vital registration data from countries with a four or five-star rating. We also calculated the proportion of TB cases that are HIV-positive (i.e., number of TB cases recorded as HIV-positive/number of TB cases with an HIV test result recorded in the WHO TB register). We used these proportions as input data for a mixed effects regression to predict the proportions of HIV-TB cases among all TB cases for all locations and years using an adult HIV death rate covariate. We estimated the fraction of HIV-TB deaths among all TB deaths in each location and year ( $D_{c,y}$ ), defined by

$$D_{c,y} = \frac{P_{c,y}RR}{P_{c,y}RR + 1 - P_{c,y}}$$

where  $P_{c,y}$  is the proportion of HIV-TB cases among all TB cases and  $RR$  is the relative risk of TB deaths in HIV positive individuals, defined by:

$$RR = \frac{D_{c,y}P_{c,y} - D_{c,y}}{D_{c,y}P_{c,y} - P_{c,y}}$$

We took the median relative risk ( $RR$ ) from each calculation. We then applied the median  $RR$  and the predicted proportions of HIV-TB cases among all TB cases to get the fractions of HIV-TB deaths among all TB deaths for all locations and years. Location-year-specific HIV-TB deaths were then calculated using the following equation:

$$Deaths_{HIV-TB} = \frac{D_{c,y}}{1 - D_{c,y}} Deaths_{TB}$$

where  $Deaths_{TB}$  is location-year specific deaths from the CODEm TB no-HIV model. Finally, we applied the age-sex pattern of the HIV mortality estimates to these HIV-TB deaths to generate location-year-age-sex-specific HIV-TB deaths. As the HIV-TB deaths were estimated based on the fraction of HIV-TB deaths among all TB deaths, the total number of HIV-TB deaths could exceed the total number of HIV deaths in some locations. To avoid this, we applied a cap of 45% on the fraction of HIV-TB deaths among HIV deaths, based on a review by Cox et al., 2010,<sup>2</sup> and a systematic review and meta-analysis by Ford et al., 2016.<sup>3</sup>

To split HIV-TB into MDR-HIV-TB and drug-sensitive HIV-TB, we first calculated the proportion of MDR-HIV-TB among all HIV-TB cases ( $P_{MDR-HIVc,y,a,s}$ ) for each location, year, age, and sex using the following formula:

$$P_{MDR-HIVc,y,a,s} = P_{MDRnoHIVc,y,a,s}RR_{HIV}$$

where  $P_{MDRnoHIVc,y,a,s}$  is the estimated proportion of MDR-TB among HIV-negative TB cases for each location, year, age, and sex (see MDR-TB modeling strategy for the detail) and  $RR_{HIV}$  is the relative risk of MDR-TB associated with HIV infection.

We then computed the fraction of MDR-HIV-TB deaths among all HIV-TB deaths ( $D_{MDR-HIVc,y,a,s}$ ) using the following formula:

$$D_{MDR-HIVc,y,a,s} = \frac{P_{MDR-HIVc,y,a,s}RR_{MDR}}{P_{MDR-HIVc,y,a,s}RR_{MDR} + 1 - P_{MDR-HIVc,y,a,s}}$$

where  $RR_{MDR}$  is the pooled relative risk of mortality in MDR-TB cases compared with drug-sensitive TB cases. We then applied the predicted MDR-HIV-TB death fractions to all HIV-TB death estimates to generate MDR-HIV-TB deaths by location, year, age, and sex. Next, we subtracted MDR-HIV-TB deaths from all HIV-TB deaths to generate drug-sensitive HIV-TB deaths by location, year, age, and sex.

To separate out XDR-HIV-TB from MDR-HIV-TB, we aggregated the XDR-TB cases and MDR-TB cases (with DST for second-line drugs) up to the super-region level and calculated the super-region level proportions of XDR-TB among MDR-TB cases. Next, we computed the super-region-specific fraction of XDR-TB deaths among all MDR-TB deaths ( $D_{XDRsr}$ ) using the following formula:

$$D_{XDRsr} = \frac{P_{XDRsr}RR_{XDR}}{P_{XDRsr}RR_{XDR} + 1 - P_{XDRsr}}$$

where  $P_{XDRsr}$  is the proportion of XDR-TB among MDR-TB cases for each super-region, and  $RR_{XDR}$  is the pooled relative risk of mortality in XDR-TB cases compared with MDR-TB cases. These fractions were then applied to MDR-TB deaths in corresponding countries within the super-regions to produce XDR-TB deaths by location, age, and sex for the most recent year of estimation. We linearly extrapolated XDR-TB mortality rates back assuming the mortality rates were zero in 1992, one year before 1993 when XDR-TB was first recorded in USA surveillance data.<sup>4</sup> Finally, we subtracted XDR-HIV-TB deaths from MDR-HIV-TB deaths to generate MDR-HIV-TB (without extensive drug resistance) deaths by location, year, age, and sex.

## References

1 Mesfin YM, Hailemariam D, Biadgign S, Kibret KT. Association between HIV/AIDS and multi-drug resistance tuberculosis: a systematic review and meta-analysis. PLoS One. 2014 Jan 8;9(1):e82235.



- 2 Cox JA, Lukande RL, Lucas S, Nelson AM, Van Marck E, Colebunders R. Autopsy causes of death in HIV-positive individuals in sub-Saharan Africa and correlation with clinical diagnoses. *AIDS Rev* 2010; **12**: 183–94.
- 3 Ford N, Matteelli A, Shubber Z, *et al.* TB as a cause of hospitalization and in-hospital mortality among people living with HIV worldwide: a systematic review and meta-analysis. *J Int AIDS Soc* 2016; **19**: 20714.
- 4 Centers for Disease Control and Prevention (CDC). Extensively Drug-Resistant Tuberculosis --- United States, 1993—2006. *MMWR*. 2007; 56(11);250-253

## Diarrheal diseases

### Diarrheal diseases

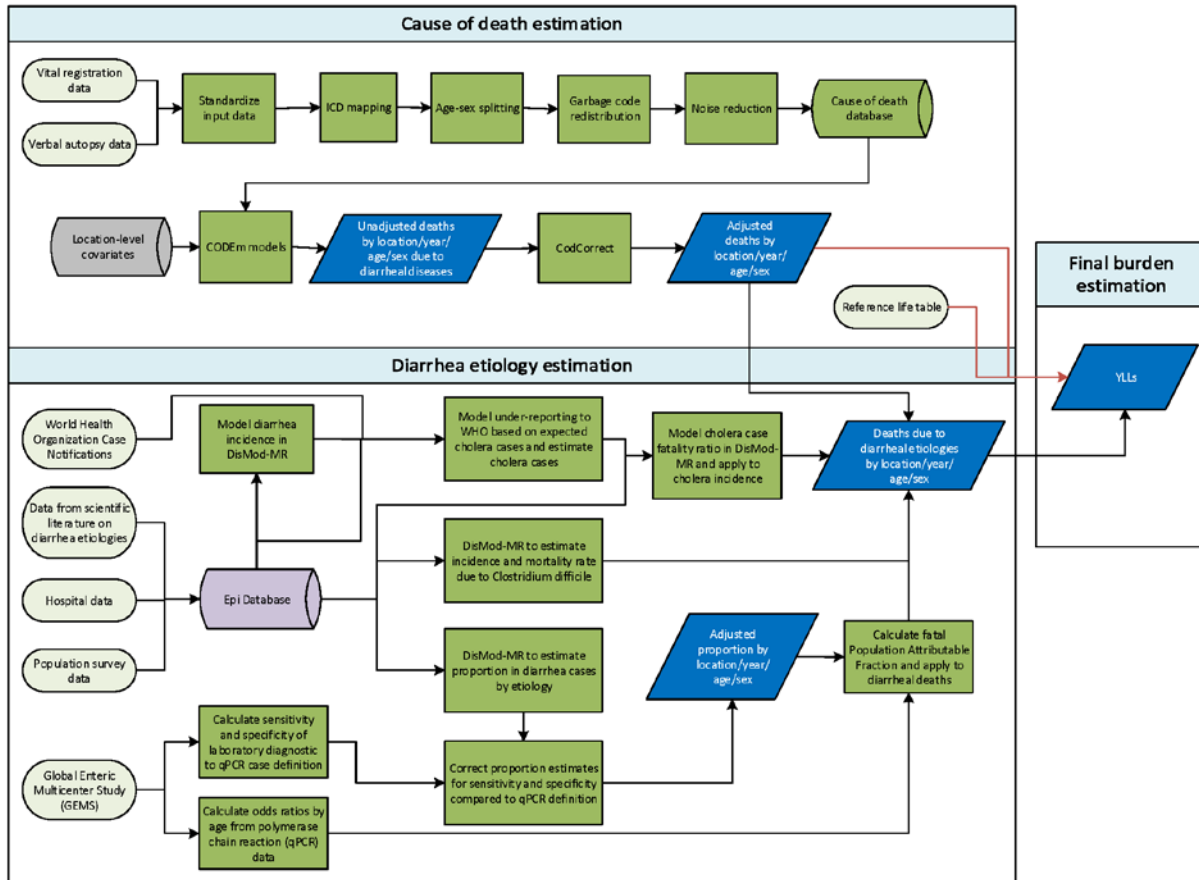

### Input data

**Cause of death.** Diarrheal disease mortality was estimated in CODEm. We estimated diarrheal mortality separately for males and females and for children under 5 years and older than 5 years. We used all available data from vital registration systems, surveillance systems and verbal autopsy (Table 1). We checked for and excluded outliers from our data by country or region. We also excluded early neonatal mortality data in the Philippines (1994–1998) and India Civil Registration System data in all states (1986–1995).

**Etiologies.** We conducted a systematic literature review for the proportion of diarrheal cases that tested positive for each etiology. We updated our review of literature to include studies published between May 2015 and May 2016. Inclusion criteria included diarrheal as the case definition, studies with a sample size of at least 100, and studies with at least one year of follow-up. We excluded studies that reported on diarrheal outbreaks exclusively and those that used acute gastroenteritis with or without diarrheal. We identified 442 studies, of which 36 met our criteria of inclusion and were included. We extracted data points for location, sex, year, and age. We assigned an age range based on the prevalence-weighted mean age of diarrheal in the appropriate year/sex/location if the age of the study participants was not reported.

We used the Global Enteric Multicenter Study (GEMS), a seven-site, case-control study of moderate-to-severe diarrhea in children under 5 years,<sup>1</sup> to calculate odds ratios for the diarrheal pathogens. We analyzed raw data for a systematic reanalysis, representative of the distribution of cases and controls by age and site, of roughly half of the 22,000 original GEMS samples that were tested for the presence of pathogen using quantitative polymerase chain reaction (qPCR).<sup>2</sup>

### **Modeling strategy**

**Cause of death.** We used country-level covariates to inform our CODEm models. We included covariates for years of education per capita, income per capita, prevalence of undernutrition (weight-for-age, weight-for-height, and height-for-age), population density above 1,000 or below 150 people per square kilometer, sanitation access, safe water access, Socio-Demographic Index, and rotavirus vaccine coverage. We evaluated our diarrheal disease cause of death models using in and out of sample predictive performance.

**Etiologies.** We estimated diarrheal disease etiologies separately from overall diarrhea mortality using a counterfactual strategy for enteric adenovirus, *Aeromonas*, *Entamoeba histolytica* (amoebiasis), *Campylobacter enteritis*, *Cryptosporidium*, typical enteropathogenic *Escherichia coli* (t-EPEC), enterotoxigenic *Escherichia coli* (ETEC), norovirus, non-typhoidal salmonella infections, rotavirus, and *Shigella*. *Vibrio cholerae* and *Clostridium difficile* were modeled separately.

Diarrheal etiologies are attributed to diarrheal deaths using a counter-factual approach. We calculated a population attributable fraction (PAF) from the proportion of severe diarrhea cases that are positive for each etiology. The PAF represents the relative reduction in diarrhea mortality if there was no exposure to a given etiology. As diarrhea can be caused by multiple pathogens and the pathogens may co-infect, PAFs can overlap and add up to more than 100%. We calculated the PAF from the proportion of severe diarrhea cases that are positive for each etiology. We assumed that hospitalized diarrhea cases are a proxy of severe and fatal cases. We used the following formula to estimate PAF:<sup>4</sup>

$$PAF = Proportion * (1 - \frac{1}{OR})$$

Where *Proportion* is the proportion of diarrhea cases positive for an etiology and *OR* is the odds ratio of diarrhea given the presence of the pathogen.

We dichotomized the continuous qPCR test result using the value of the cycle threshold (Ct) that most accurately discriminated between cases and controls. The Ct values range from 0 to 35 cycles representing the relative concentration of the target gene in the stool sample. A low value indicates a higher concentration of the pathogen while a value of 35 indicates the absence of the target in the sample. We used the lower Ct value when we had multiple Ct values for the cutpoint. The case definition for each pathogen is a Ct value that is below the established cutoff point.

We used a mixed effects conditional logistic regression model to calculate the odds ratio for under 1 year and 1-4 years old for each of our pathogens. The odds ratio for 1-4 years was applied to all GBD age groups over 5 years. There were three pathogen-age odds ratios that were not statistically significant: *Aeromonas* and Amoebiasis in under 1 year and *Campylobacter* in 1-4 years. The mean value of the odds ratio was above 1 in all three cases so we transformed the odds ratios for these three exceptions only in log-space such that exponentiated values could not be below 1. The transformation was:

$$\text{Odds ratio} = \exp(\log(\text{or}) - 1) + 1$$

We modeled the proportion data using the meta-regression tool DisMod-MR to estimate the proportion of positive diarrhea cases for each separate etiology by location/year/age/sex and to adjust for the covariates.

We used the estimated sensitivity and specificity of the laboratory diagnostic technique used in the GEMS study compared to the qPCR case definition to adjust our proportion before we computed the PAF:<sup>5</sup>

$$\text{Proportion}_{\text{True}} = \frac{(\text{Proportion}_{\text{Observed}} + \text{Specificity} - 1)}{(\text{Sensitivity} + \text{Specificity} - 1)}$$

We used this correction to account for the fact that the proportions we used are based on a new test that is not consistent with the laboratory-based case definition (qPCR versus GEMS conventional laboratory testing for pathogens).<sup>15</sup>

Our literature review extracted the proportion of any enteropathogenic *Escherichia coli* (EPEC) without differentiating between typical (tEPEC) and atypical (aEPEC). In order to be consistent with the odds ratios that we obtained, we adjusted our proportion estimates of any EPEC to typical EPEC only. This adjustment was informed by a subset of our literature review that reported both atypical and typical EPEC. We estimated a ratio by super-region of tEPEC to any EPEC and adjusted our proportion estimates accordingly. We found that the majority of EPEC diarrhea cases were positive for atypical EPEC, consistent with other published work.<sup>3</sup>

For *Vibrio cholerae* (cholera), we used the literature review to estimate expected number of cholera cases for each country-year using the incidence of diarrhoea, estimated using DisMod-MR, and the proportion of diarrhoea cases that are positive for cholera. We assigned cholera PAF using odds ratios from the qPCR results to estimate a number of cholera-attributable cases. We compared this expected number of cholera cases to the number reported to the World Health Organization at the country-year level.<sup>6</sup> We modeled the underreporting fraction to correct the cholera case notification data for all countries using health system access and the diarrhoea SEV scalar to predict total cholera cases. We used the age-specific proportion of positive cholera samples in DisMod and our incidence estimates to predict the number of cholera cases for each age/sex/year/location. Finally, we modeled the case fatality ratio of cholera using DisMod-MR and to estimate the number of cholera deaths.

For *C. difficile*, we modeled incidence and mortality in DisMod-MR for each age, sex, year, location. DisMod-MR is a Bayesian meta-regression tool that uses spatio-temporal information as priors to estimate prevalence, incidence, remission, and mortality for *C. difficile* infection. DisMod-MR uses a compartmental model to relate prevalence, incidence, remission, and mortality. We set remission in our model to 1 month.

**Table 1. Cause-specific mortality input data.**

| Type of data              | Input data               |
|---------------------------|--------------------------|
| <b>Total data sources</b> | <b>16,980 site-years</b> |
| Vital registration data   | 15,087 site-years        |
| Surveillance data         | 877 site-years           |
| Verbal autopsy data       | 1,016 site-years         |

## References

- 1 Kotloff KL, Nataro JP, Blackwelder WC, *et al.* Burden and aetiology of diarrhoeal disease in infants and young children in developing countries (the Global Enteric Multicenter Study, GEMS): a prospective, case-control study. *Lancet Lond Engl* 2013; **382**: 209–22.
- 2 Liu J, Gratz J, Amour C, *et al.* A laboratory-developed TaqMan Array Card for simultaneous detection of 19 enteropathogens. *J Clin Microbiol* 2013; **51**: 472–80.
- 3 Ochoa TJ, Barletta F, Contreras C, Mercado E. New insights into the epidemiology of enteropathogenic *Escherichia coli* infection. *Trans R Soc Trop Med Hyg* 2008; **102**: 852–6.
- 4 Miettinen OS. Proportion of disease caused or prevented by a given exposure, trait or intervention. *Am J Epidemiol* 1974; **99**: 325–32.
- 5 Reiczigel J, Földi J, Ozsvári L. Exact confidence limits for prevalence of a disease with an imperfect diagnostic test. *Epidemiol Infect* 2010; **138**: 1674–8.
- 6 World Health Organization. Global Health Observatory data repository: Cholera. 2016. <http://apps.who.int/gho/data/node.main.174?lang=en> (accessed Aug 25, 2016).

# Typhoid fever

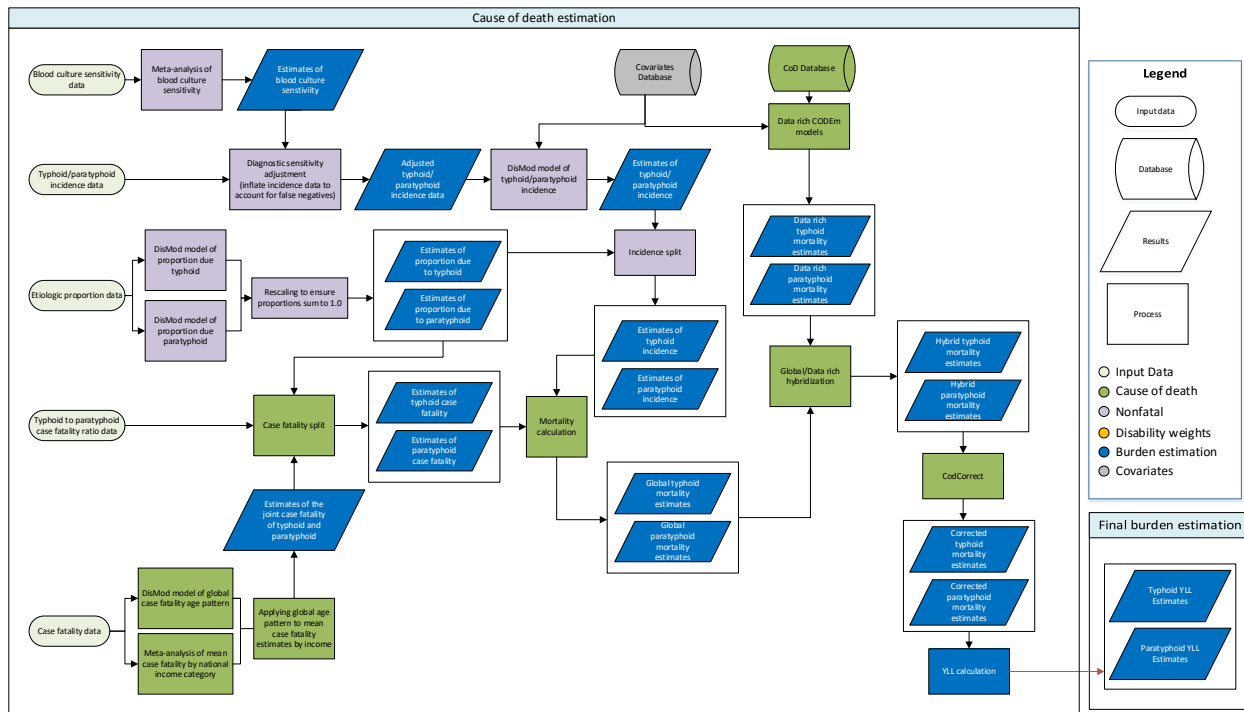

## Input data

Our incidence dataset included a combination of data from prospective cohort studies and national surveillance systems. Similarly, data on proportions due to typhoid and paratyphoid included a combination of prospective cohort studies and national surveillance systems. Case fatality data were from national surveillance systems and hospital databases.

## Modelling strategy

We model typhoid deaths using a natural history model in which we first model total incidence of typhoid and paratyphoid combined. Second, we model the proportion of this total due to typhoid and the proportion due to paratyphoid. Third, we estimate case fatality by age and national income category for typhoid and paratyphoid combined. Fourth, we use data on the relative fatality of typhoid and paratyphoid to split the joint case fatality estimates into typhoid- and paratyphoid-specific case fatality estimates. Finally, we estimate cause-specific mortality rates as the product of incidence and case fatality.

Total incidence was modelled using DisMod-MR, using the proportion of the population with access to clean water, and the proportion of the population living in the Indian Ocean monsoon belt as covariates. We performed a crosswalk using a study-level covariate indicating sources that were based on passive versus active surveillance, with active surveillance as the reference. This adjusts for incomplete case capture by passive surveillance. Incidence data were inflated to account for poor diagnostic sensitivity, based on a meta-analysis of the sensitivity of blood culture, the most common diagnostic used for

typhoid. Similarly, we used two DisMod models to estimate etiologic proportions: one for the proportion of total incidence due to typhoid, and one for the proportion due to paratyphoid.

Case fatality data were too limited to allow for a complete DisMod model, or to allow for varying estimates by time and space. We had sufficient data, however, to estimate case fatality by age and by three categories of national income. We used DisMod to extract a global age-pattern in case fatality, and meta-regression to estimate the mean case fatality by income category. Finally, we estimated the relative risk of death from typhoid relative to paratyphoid based on data from Chinese surveillance and used that relative risk to estimate case fatality separately for typhoid and paratyphoid, by age and income.

Finally, we estimated typhoid mortality as the product of total incidence, the proportion of the total due to typhoid, and case fatality for typhoid. We propagated uncertainty through every step of the modelling process by pulling 1,000 draws from the distribution of each model component (eg, incidence, proportion due to typhoid, overall case fatality, case fatality age pattern, relative fatalness of typhoid versus paratyphoid), and performing all calculations at the draw level.

We have made no substantive changes to the modelling strategy in 2016.

# Paratyphoid fever

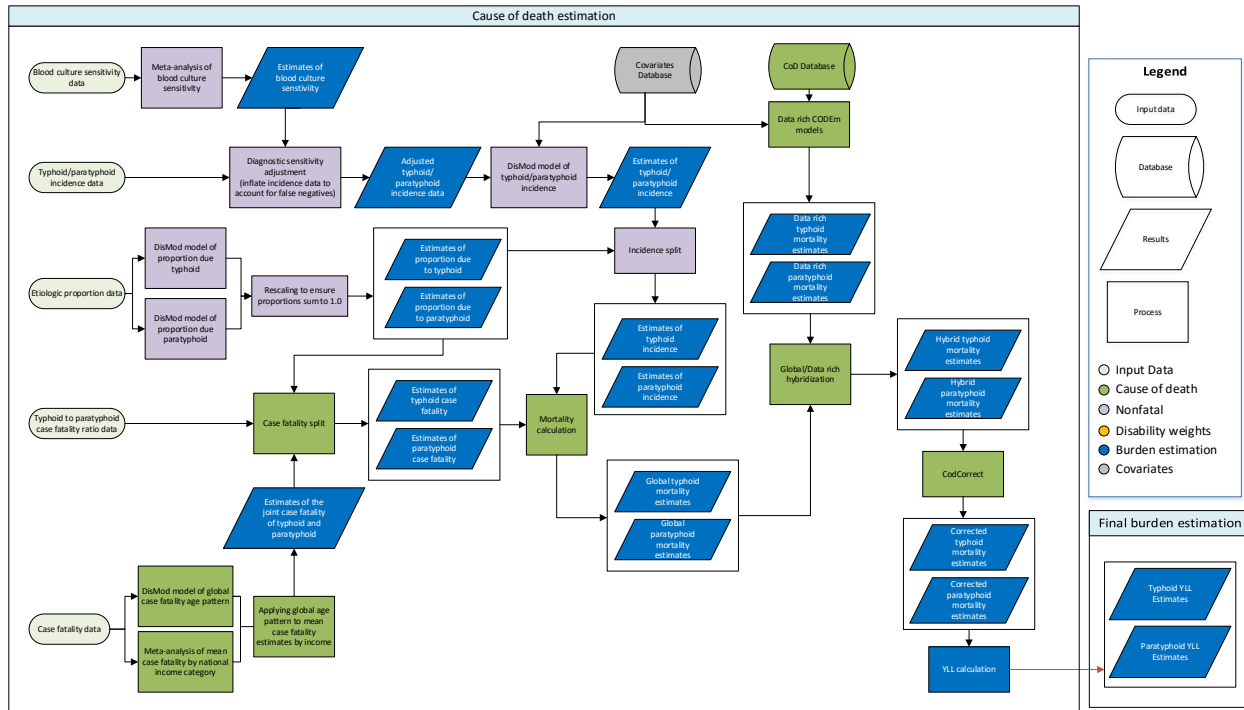

## Input data

Our incidence dataset included a combination of data from prospective cohort studies and national surveillance systems. Similarly, data on proportions due to typhoid and paratyphoid included a combination of prospective cohort studies and national surveillance systems. Case fatality data were from national surveillance systems and hospital databases.

## Modelling strategy

We model paratyphoid deaths using a natural history model in which we first model total incidence of typhoid and paratyphoid combined. For the natural history model we first model total incidence of typhoid and paratyphoid combined. Second, we model the proportion of this total due to typhoid and the proportion due to paratyphoid. Third, we estimate case fatality by age and national income category for typhoid and paratyphoid combined. Fourth, we use data on the relative fatality of typhoid and paratyphoid to split the joint case fatality estimates into typhoid- and paratyphoid-specific case fatality estimates. Finally, we estimate cause-specific mortality rates as the product of incidence and case fatality.

Total incidence was modelled using DisMod-MR, using the proportion of the population with access to clean water and the proportion of the population living in the Indian Ocean monsoon belt as covariates. We performed a crosswalk using a study-level covariate indicating sources that were based on passive versus active surveillance, with active surveillance as the reference. This adjusts for incomplete case



capture by passive surveillance. Incidence data were inflated to account for poor diagnostic sensitivity, based on a meta-analysis of the sensitivity of blood culture, the most common diagnostic used for paratyphoid. Similarly, we used two DisMod models to estimate aetiologic proportions: one for the proportion of total incidence due to typhoid, and one for the proportion due to paratyphoid.

Case fatality data were too limited to allow for a complete DisMod model, or to allow for varying estimates by time and space. We had sufficient data, however, to estimate case fatality by age and by three categories of national income. We used DisMod to extract a global age-pattern in case fatality, and meta-regression to estimate the mean case fatality by income category. Finally, we estimated the relative risk of death from typhoid relative to paratyphoid based on data from Chinese surveillance and used that relative risk to estimate case fatality separately for typhoid and paratyphoid, by age and income.

Finally, we estimated paratyphoid mortality as the product of total incidence, the proportion of the total due to paratyphoid, and case fatality for paratyphoid. We propagated uncertainty through every step of the modelling process by pulling 1,000 draws from the distribution of each model component (eg, incidence, proportion due to paratyphoid, overall case fatality, case fatality age pattern, relative fatality of typhoid versus paratyphoid), and performing all calculations at the draw level.

We have made no substantive changes to the modelling strategy in 2016.

## Other Intestinal Infectious Diseases

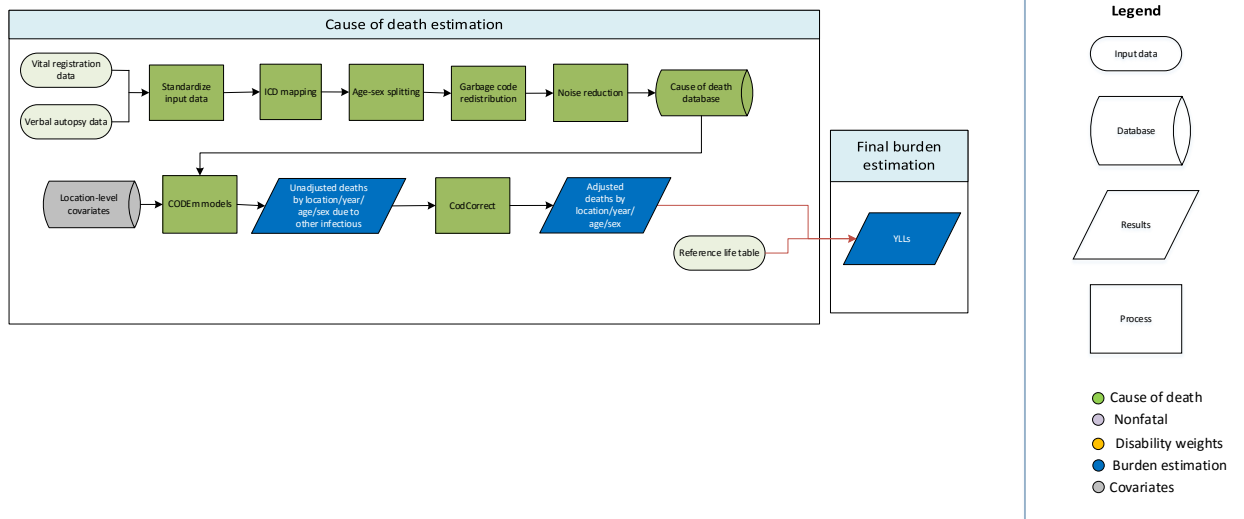

### Input data

We modelled other intestinal infectious disease mortality using all available data in the cause of death database. Data points were outliered if they reported an improbable number of deaths or if their inclusion in the model yielded distorted trends. In some cases multiple data sources for the same location differed dramatically both in their quality and reported other intestinal infectious disease mortality (eg, a verbal autopsy and vital registration source). In these cases the lower-quality data source was outliered.

### Modelling strategy

We modelled other intestinal infectious disease mortality using a custom negative-binomial model of all data in the CoD database, using the proportion of the population with access to clean water as a covariate.

Since GBD 2015 we have switched from a CODEm model to custom model for this cause to better handle the small number of deaths reported for other intestinal infectious diseases.

## Lower Respiratory Infections

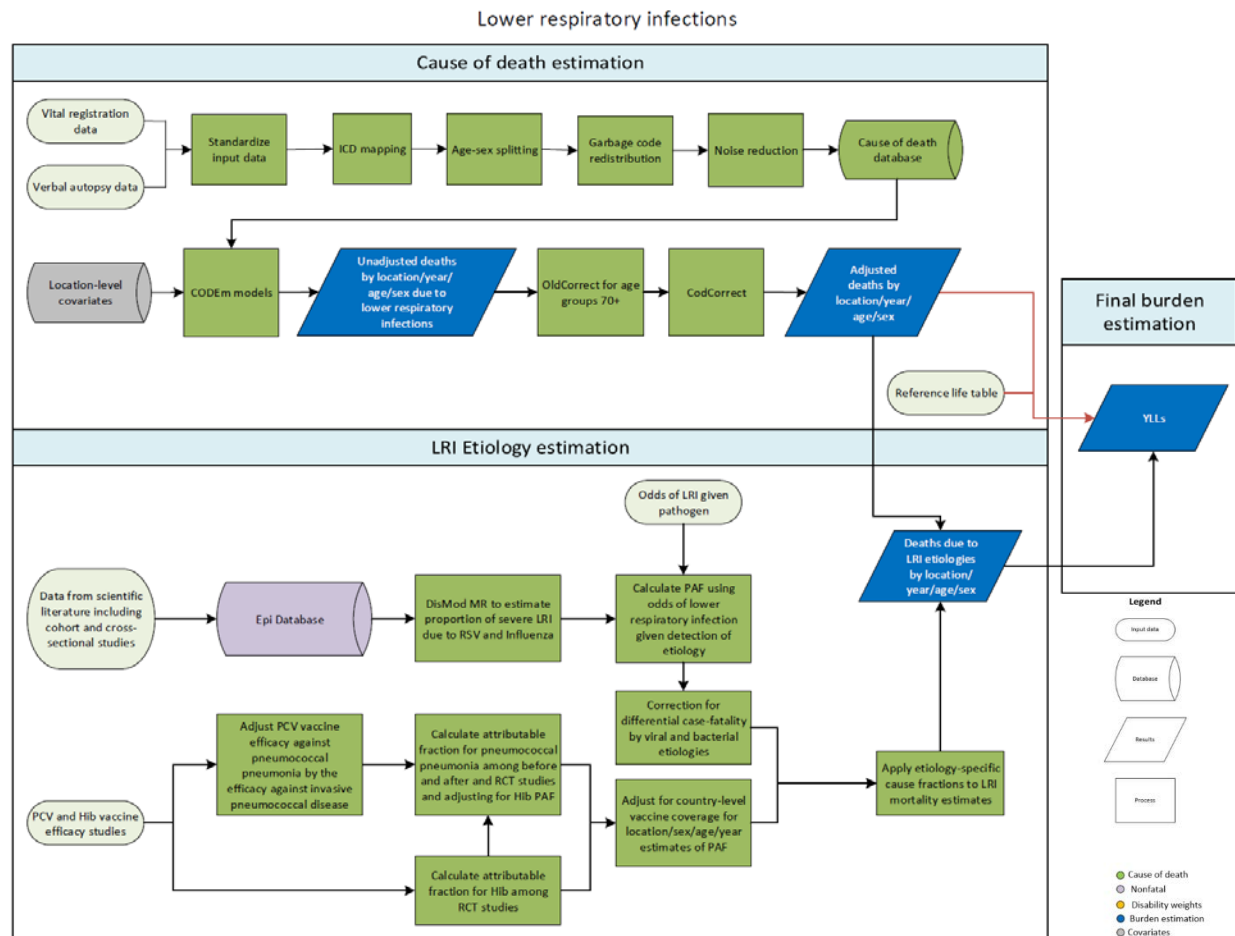

### Input data

**Cause of deaths.** Lower respiratory infection (LRI) mortality was estimated in CODEm. We estimated LRI mortality separately for males and females and for children under 5 years and older than 5 years. We used all available data from vital registration systems, surveillance systems, and verbal autopsy (Table 1). We checked for and excluded outliers from our data by country or region. We also excluded ICD9-coded mortality data in Sri Lanka (1982, 1987–1992), ICD9-coded neonatal mortality data in Guatemala (1980, 1981, 1984, 2000–2004), and Civil Registration System data in many Indian states (1986–1995).

**Etiologies.** We updated our systematic review of scientific literature for the proportion of LRI that tested positive for influenza and respiratory syncytial virus (RSV) to include all data from GBD 2015 and from studies published between May 2015 and May 2016. Inclusion criteria were studies that had a sample size of at least 100, studies that were at least one year in duration, and studies describing lower respiratory infections, pneumonia, or bronchiolitis as the case definition. During our literature review we identified 209 studies, of which 7 met our inclusion criteria and were extracted. We excluded studies that described pandemic H1N1 influenza solely and studies that used influenza-like illness as the case definition. We assigned an age range based on the prevalence-weighted mean age of LRI in the appropriate year/sex/location if the ages of the study participants were not reported.

We also conducted a systematic literature review of studies on the Hib vaccine and PCV effectiveness studies against X-ray-confirmed pneumonia and against pneumococcal and Hib disease until May 2016. For PCV studies, we extracted, if available, the distribution of pneumococcal pneumonia serotypes and the serotypes included in the PCV used in the study. No new studies were identified for GBD 2016. We excluded observational and case-control studies due to implausibly high vaccine efficacy estimates. Hib trial data were exclusively from children <5 years so we did not include the effect of Hib on ages over 5 years of age. PCV trial data are also frequently limited to younger age populations. To understand the contribution of pneumococcal pneumonia in older populations, we also included PCV efficacy studies that used before-after approaches.

### **Modeling strategy**

**Cause of death.** We used country-level covariates to inform our CODEm models. We included the following covariates in our LRI models: diphtheria-tetanus-pertussis vaccine coverage, years of education per capita, health system access, income per capita, prevalence of children malnutrition (<2 standard deviations below global mean of weight for age), prevalence of exposure to indoor air pollution (solid fuel use), outdoor air pollution level of PM<sub>2.5</sub>, smoking prevalence, pneumococcal conjugate vaccine (PCV) coverage, *Haemophilus influenzae* type B (Hib) vaccine coverage, access to improved water, access to improved sanitation, and Socio-Demographic Index. We evaluated our LRI cause of death models using in and out of sample predictive performance.

Like all models of mortality in GBD, LRI mortality models are single-cause, requiring in effect that the sum of all mortality models must be equal to the all-cause mortality envelope. We correct LRI mortality estimates, and other causes of mortality, by re-scaling them according to the uncertainty around the cause-specific mortality rate. This process is called CoDCorrect and is essential to ensure internal consistency among causes of death. Before CoDCorrect, we also adjust LRI mortality for unreliable estimates due to improper death certification and ICD coding among elderly adults where the underlying cause of death should be Alzheimer's or Parkinson's diseases. This process scales LRI mortality among adult age groups 70+ years into a new envelope without Alzheimer's and Parkinson's. Further details can be found in section 4 of the appendix.

**Etiologies.** We estimated LRI etiologies separately from overall LRI mortality using two distinct counterfactual modeling strategies to estimate population attributable fractions (PAFs), described in detail below. The PAF represents the relative reduction in LRI mortality if there was no exposure to a given etiology. As LRIs can be caused by multiple pathogens and the pathogens may co-infect, PAFs can overlap and add up to more than 100%. Separate strategies were used for viral- influenza and respiratory syncytial virus (RSV)- and bacterial- *Streptococcus pneumoniae* and *Haemophilus influenzae* type B- etiologies. We did not attribute etiologies to neonatal pneumonia deaths due to a dearth of reliable data in this age group. We calculated uncertainty of our PAF estimates from 1,000 draws of each parameter using normal distributions in log space.

**Influenza and RSV.** We calculated the population attributable fraction (PAF) from the proportion of severe LRI cases positive for influenza and RSV. We assumed that hospitalized LRI cases are a proxy of severe cases. We used the following formula to estimate PAF:<sup>1</sup>

$$\text{PAF} = \text{Proportion} * (1-1/\text{OR})$$

Where *Proportion* is the proportion of LRI cases that test positive for influenza or RSV and *OR* is the odds ratio of LRI given the presence of the pathogen. We used an odds ratio of 5.1 (3.19 – 8.14) for influenza and 9.79 (4.98 – 19.27) for RSV from a recently published meta-analysis.<sup>2</sup> These odds ratios are marginally different from those used in GBD 2013.

We modeled the proportion data using the meta-regression tool DisMod-MR to estimate the proportion of LRI cases that are positive for influenza and RSV, separately, by location/year/age/sex. We accounted for study-level covariates in our models such as PCR as the diagnostic technique, studies that investigated RSV or influenza exclusively, and studies from inpatient populations.

As the case-fatality of viral causes of pneumonia is lower than for bacterial causes, we adjusted for differential case-fatality by determining the etiological fractions for mortality attributable to RSV and influenza (**Table 2**). We measured the etiologic fractions by applying a relative case-fatality adjustment based on in-hospital case-fatality, which we coded to specific pneumonia etiologies. Hospital admissions data of this type were limited to data from the USA, Austria, Brazil, and Mexico. We generated the pooled estimate of the case-fatality differential between bacterial (pneumococcus, Hib) and viral etiologies (RSV, influenza) using DisMod-MR.

***Pneumococcal pneumonia and Hib.*** For *Streptococcus pneumoniae* (pneumococcal pneumonia) and *Haemophilus influenzae* type B (Hib), we calculated the population attributable fraction using a vaccine probe design.<sup>3,4</sup> The ratio of vaccine effectiveness against nonspecific pneumonia to pathogen-specific disease represents the fraction of pneumonia cases attributable to each pathogen.

To estimate the PAF for Hib and pneumococcal pneumonia, we calculated the ratio of vaccine effectiveness against nonspecific pneumonia to pathogen-specific pneumonia (Equations 1 and 3). We estimated a study-level estimate of PAF from a meta-analysis of these ratios. To estimate the PAF for Hib, we only used randomized controlled trials because of implausibly high values of vaccine efficacy in case-control studies. To estimate the PAF for pneumococcal pneumonia, we included RCTs and before and after vaccine introduction longitudinal studies.

We adjusted the study-level PAF estimate by vaccine coverage and expected vaccine performance to estimate country- and year-specific PAF values. For pneumococcal pneumonia, we adjusted the PAF by the final Hib PAF estimate and by vaccine serotype coverage. Finally, we used an age distribution of PAF modeled in DisMod to determine the PAF by age. Because of an absence of data describing vaccine efficacy against Hib in children older than two years, we did not attribute Hib to episodes of LRI in ages five years and older.

We used a vaccine probe design to estimate the PAF for pneumococcal pneumonia and (Hib) by first calculating the ratio of vaccine effectiveness against nonspecific pneumonia to pathogen-specific pneumonia at the study level (Equations 1 and 2).<sup>3-5</sup> We then adjusted this estimate by vaccine coverage and expected vaccine performance to estimate country- and year-specific PAF values (Equations 3 and 4).

$$1) \text{ HibPAF}_{Base} = 1 - \frac{VE_{Pneumonia}}{VE_{Hib}}$$

$$2) \text{ PneumoPAF}_{Base} = 1 - \frac{VE_{Pneumonia} * (1 - PAF_{Hib} * VE_{Hib \text{ Optimal}})}{VE_{Streptococcus} * Cov_{Serotype}}$$

$$3) PAF_{Hib} = PAF_{Base} * \frac{(1 - Cov_{Hib} * VE_{Hib\ Optimal})}{(1 - PAF_{Base} * Cov_{Hib} * VE_{Hib\ Optimal})}$$

$$4) PAF_{Pneumo} = \frac{PAF_{Base} * (1 - Cov_{PCV} * VE_{PCV\ Optimal})}{(1 - PAF_{Hib} * Cov_{Hib} * VE_{Hib\ Optimal}) * \left(1 - \frac{PAF_{Base} * Cov_{PCV} * VE_{PCV\ Optimal}}{(1 - PAF_{Hib} * Cov_{Hib} * VE_{Hib\ Optimal})}\right)}$$

Where  $VE_{Pneumonia}$  is the vaccine efficacy against nonspecific pneumonia,  $VE_{Hib}$  is the vaccine efficacy against invasive Hib disease,  $VE_{Streptococcus}$  is the vaccine efficacy against serotype-specific pneumococcal pneumonia,  $Cov_{serotype}$  is the serotype-specific vaccine coverage for PCV,<sup>6</sup>  $VE_{Hib\ Optimal}$  is the Hib effectiveness in the community (0.8)<sup>7</sup>,  $PAF_{Hib}$  is the final PAF for Hib,  $Cov_{PCV}$  is the PCV coverage,  $Cov_{Hib}$  is the Hib coverage by country, and  $VE_{PCV\ Optimal}$  is the vaccine effectiveness in the community (0.8).<sup>8</sup>

For Hib, we assumed that the vaccine efficacy against invasive Hib disease is the same against Hib pneumonia. For pneumococcal pneumonia, a recent study in adults<sup>9</sup> found that the vaccine efficacy against invasive pneumococcal disease may be significantly higher than against pneumococcal pneumonia. We used this ratio to adjust estimates of vaccine efficacy against invasive pneumococcal disease from other studies. However, recognizing that the study is unique in that it uses a urine antigen test among adults, we added uncertainty around our adjustment using a wide uniform distribution (median 0.65, 0.3-1.0). This has increased the estimates of pneumococcal pneumonia mortality in a meaningful way.

There are no major changes to the cause of death estimation strategy for LRI or its etiologies from GBD 2015 to GBD 2016.

**Table 1. Summary of cause-specific mortality modeling input data.**

| Type of data            | Input data        |
|-------------------------|-------------------|
| Total data sources      | 12,155 site-years |
| Vital registration data | 10,312 site-years |
| Surveillance data       | 928 site-years    |
| Verbal autopsy data     | 915 site-years    |

**Table 2: The median values for the ratio of viral to bacterial pneumonia case fatality ratio by age is shown.** These estimates are modeled using hospital-based, ICD-coded admissions and mortality for etiology-specified pneumonia. Values in parentheses represent 95% Uncertainty Interval.

| Age Group      | Ratio            |
|----------------|------------------|
| Early Neonatal | 0.34 (0.19-0.58) |
| Late Neonatal  | 0.34 (0.19-0.58) |
| Post Neonatal  | 0.34 (0.19-0.58) |
| 1 to 4         | 0.28 (0.16-0.44) |
| 5 to 9         | 0.31 (0.15-0.56) |
| 10 to 14       | 0.33 (0.19-0.53) |
| 15 to 19       | 0.37 (0.2-0.64)  |
| 20 to 24       | 0.46 (0.12-1.16) |
| 25 to 29       | 0.44 (0.17-0.93) |
| 30 to 34       | 0.46 (0.22-0.83) |
| 35 to 39       | 0.5 (0.22-1)     |
| 40 to 44       | 0.61 (0.13-1.75) |
| 45 to 49       | 0.5 (0.21-0.99)  |
| 50 to 54       | 0.44 (0.23-0.74) |
| 55 to 59       | 0.42 (0.21-0.75) |
| 60 to 64       | 0.42 (0.15-0.95) |
| 65 to 69       | 0.39 (0.19-0.7)  |
| 70 to 74       | 0.38 (0.21-0.61) |
| 75 to 79       | 0.37 (0.2-0.62)  |
| 80 to 84       | 0.37 (0.17-0.71) |
| 85 to 89       | 0.34 (0.19-0.59) |
| 90 to 94       | 0.33 (0.16-0.61) |
| 95 to 99       | 0.34 (0.13-0.8)  |

## References

- 1 Miettinen OS. Proportion of disease caused or prevented by a given exposure, trait or intervention. *Am J Epidemiol* 1974; **99**: 325–32.
- 2 Shi T, McLean K, Campbell H, Nair H. Aetiological role of common respiratory viruses in acute lower respiratory infections in children under five years: A systematic review and meta-analysis. *J Glob Health* 2015; **5**: 10408.
- 3 Feikin DR, Scott JAG, Gessner BD. Use of vaccines as probes to define disease burden. *Lancet Lond Engl* 2014; **383**: 1762–70.

- 4 O'Brien KL, Wolfson LJ, Watt JP, *et al.* Burden of disease caused by *Streptococcus pneumoniae* in children younger than 5 years: global estimates. *Lancet Lond Engl* 2009; **374**: 893–902.
- 5 Watt JP, Wolfson LJ, O'Brien KL, *et al.* Burden of disease caused by *Haemophilus influenzae* type b in children younger than 5 years: global estimates. *Lancet Lond Engl* 2009; **374**: 903–11.
- 6 Johnson HL, Deloria-Knoll M, Levine OS, *et al.* Systematic evaluation of serotypes causing invasive pneumococcal disease among children under five: the pneumococcal global serotype project. *PLoS Med* 2010; **7**. DOI:10.1371/journal.pmed.1000348.
- 7 Swingle G, Fransman D, Hussey G. Conjugate vaccines for preventing *Haemophilus influenzae* type B infections. *Cochrane Database Syst Rev* 2007; : CD001729.
- 8 Lucero MG, Dulalia VE, Nillos LT, *et al.* Pneumococcal conjugate vaccines for preventing vaccine-type invasive pneumococcal disease and X-ray defined pneumonia in children less than two years of age. *Cochrane Database Syst Rev* 2009; : CD004977.
- 9 Bonten MJM, Huijts SM, Bolkenbaas M, *et al.* Polysaccharide conjugate vaccine against pneumococcal pneumonia in adults. *N Engl J Med* 2015; **372**: 1114–25.



## Upper respiratory infections

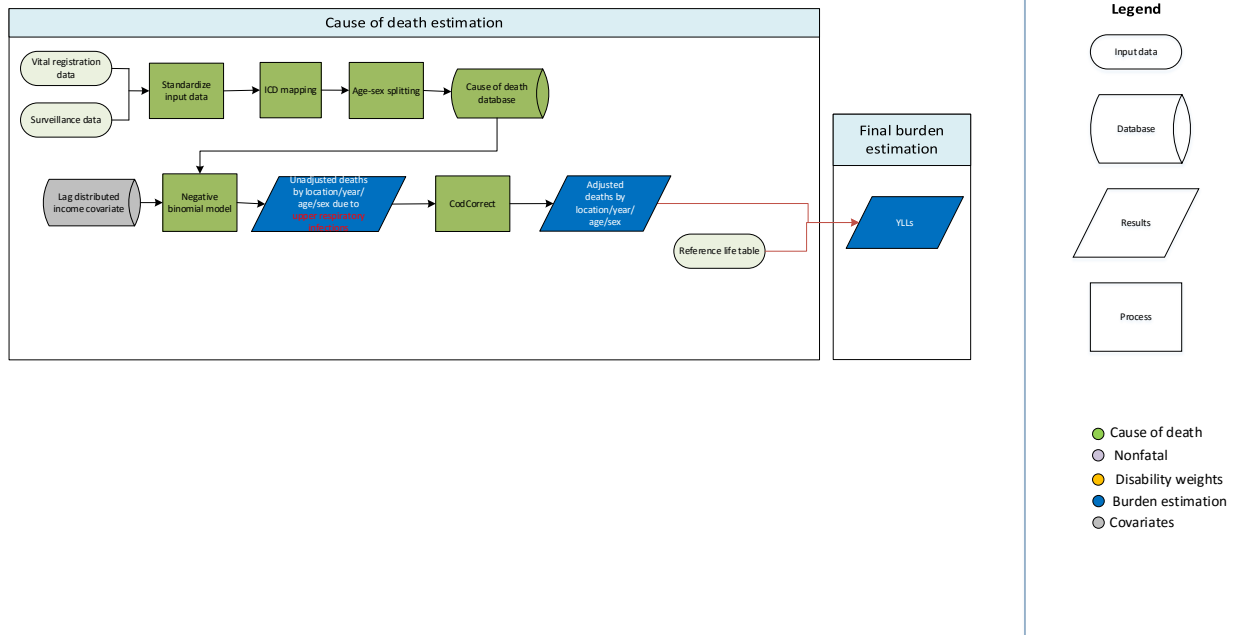

### Input data

Vital registration and surveillance data from the cause of death database were used. Data with very high cause fractions (those greater than the 99th percentile values) were excluded in the regression.

### Modeling strategy

Due to a small number of deaths, mortality from upper respiratory infections was modeled using a negative binomial regression, which is more appropriate than a Poisson count model as it accounts for greater variance (over-dispersion) in the data. By utilizing the exposure option in Stata, we model cause fractions with a negative binomial model. We tested both rate- and cause fraction-based models but selected a cause fraction model due to better model performance. Using the input data mentioned above, we modeled mortality from upper respiratory infections using the lag distributed income covariate and age dummy variables and the exposure set to the total number of deaths in the study. Uncertainty was estimated by taking 1,000 iterations of the predictions based on the variance covariance matrix and a random sample from a gamma distribution. The fit of the model was evaluated using diagnostic plots of predicted versus observed values.

# Otitis Media

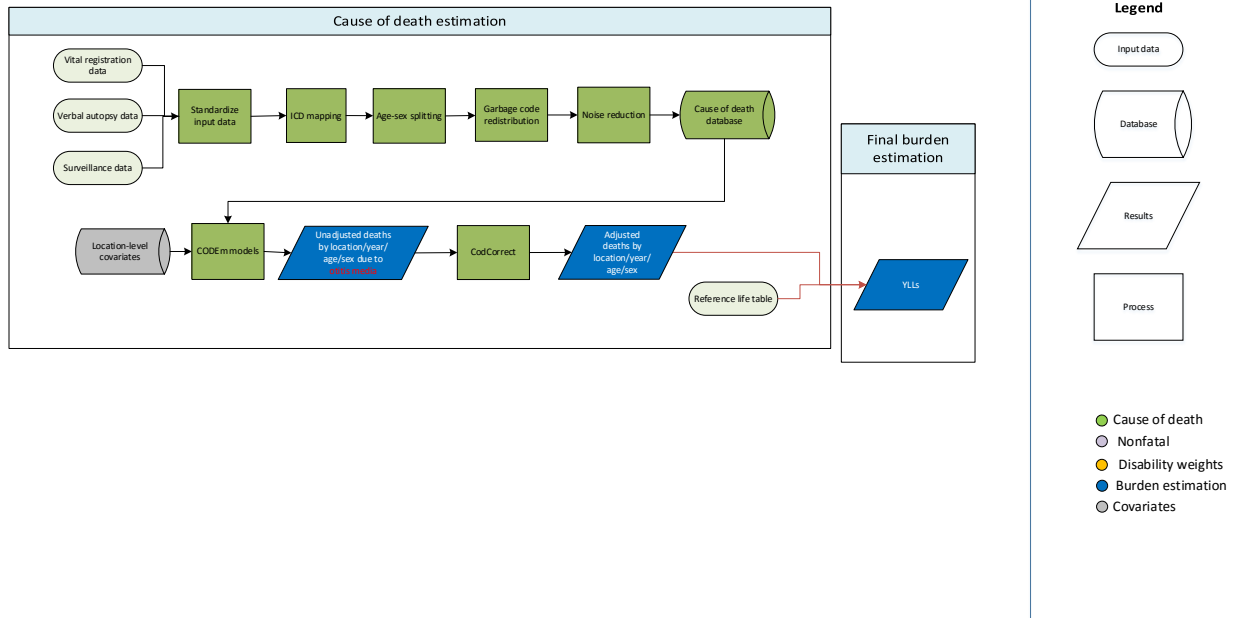

## Input data

Vital registration, verbal autopsy, and surveillance data were used. We outliered data that were largely conflicting with the majority of data from other studies conducted either in the same or different countries (with similar socio-demographic characteristics) in the same region.

## Modelling strategy

A general CODEm modelling strategy was used. There were no substantive changes from GBD 2015 in terms of modelling strategy.

## Meningitis

Causes included in this write-up: Meningitis (total), meningococcal meningitis, pneumococcal meningitis, Haemophilus influenza type B meningitis, and other meningitis

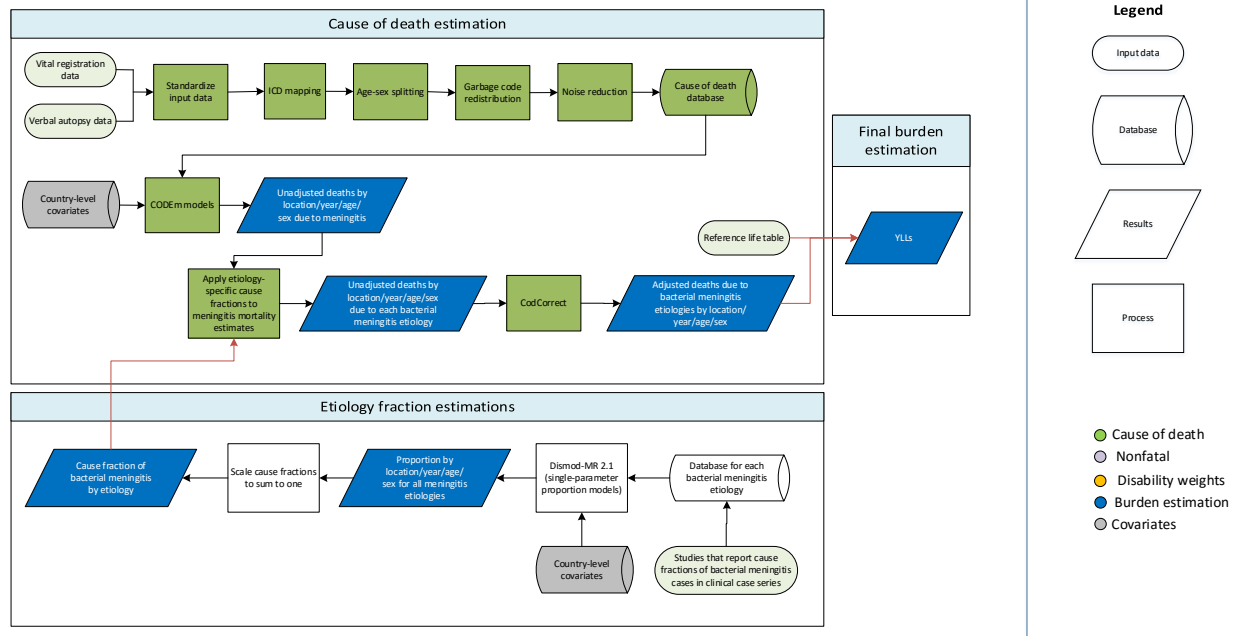

### Input data

Input data for the overall meningitis model came from the cause of death database, which includes vital registration (VR) and verbal autopsy (VA) data. We outliered data in instances where garbage code redistribution and noise reduction, in combination with small sample sizes, resulted in unreasonable cause fractions when compared to regional, super-regional, and global rates, and data that violated well-established time or age trends. Outliering methods were consistent across both VR and VA data.

Input data that informed the aetiology splits for meningitis came from cause-specific VR mortality proportions, as well as a systematic review completed for the first time in GBD 2016. Previously, aetiologic attribution of meningitis deaths was informed by the proportion of incident cases due to each class of pathogen rather than the proportion of deaths. Viral meningitis mortality is rare except in the youngest age groups and is included with “other meningitis.”

For GBD 2016, we conducted a new systematic literature review on meningitis mortality aetiologies with the following search string:

((("Meningitis"[MeSH] OR "Meningitis, pneumococcal"[MeSH] OR "Meningitis, Haemophilus"[MeSH] OR "Meningitis, Meningococcal"[MeSH] OR "Meningitis, viral"[MeSH] OR "Meningitis"[Title/Abstract]) AND ("etiology"[Title/Abstract] OR "causes" Title/Abstract] OR "cause pattern"[Title/Abstract] OR "aetiology"[Title/Abstract] OR "cause"[Title/Abstract]) AND ("fatality"[Title/Abstract] OR "mortality"[Title/Abstract] OR "death"[Title/Abstract]) AND 1985/01/01[PDAT]:3000/12/31[PDAT]) AND "humans"[MeSH])

The search yielded 1,290 hits, of which over 400 were reviewed and 20 were extracted for use in GBD 2016 modelling.

### **Modelling strategy**

We modelled deaths due to all bacterial meningitis with two CODEm models, separately for each sex and two age categories – under-5 and 5 years and above – because the mortality trends differ substantially between children and adults, and there are a significant number of data sources that only have data for under-5-year-olds. The two models used the same covariates and otherwise standard CODEm parameters. The final sex-specific models for deaths due to all bacterial meningitis were a hybridized model of separate global and data-rich models for males and females.

To obtain estimates for each of the four aetiologies of bacterial meningitis – meningococcal, pneumococcal, H influenza type B, and other bacterial – we ran separate proportion models in DisMod-MR 2.2 using VR proportion and systematic review data. The meningococcal meningitis proportion model used two country-level covariates to inform the model – proportion of the population living within the meningitis belt, and proportion of the population covered by the meningococcal meningitis type A vaccine (an initiative called Menafrivac). The pneumococcal meningitis model was informed by PCV3 vaccine coverage, and the H influenza type B meningitis model was informed by HiB3 vaccine coverage. The other meningitis proportion model did not use any country-level covariates.

Since DisMod-MR 2.2 estimates in 5-year intervals, the aetiological proportions for years between the intervals were interpolated at the draw level. The four proportion models were scaled to 1 at the draw level for each location, year, sex, and age combination. We applied these proportions to the total meningitis cause of death models to produce estimates for each of the four etiologies. We used the GBD shared function `split_cod_model` to complete this proportional split into the four etiologies of meningitis currently modeled. This is a new methodological approach for GBD 2016, which we hope to further refine for GBD 2017.

# Encephalitis

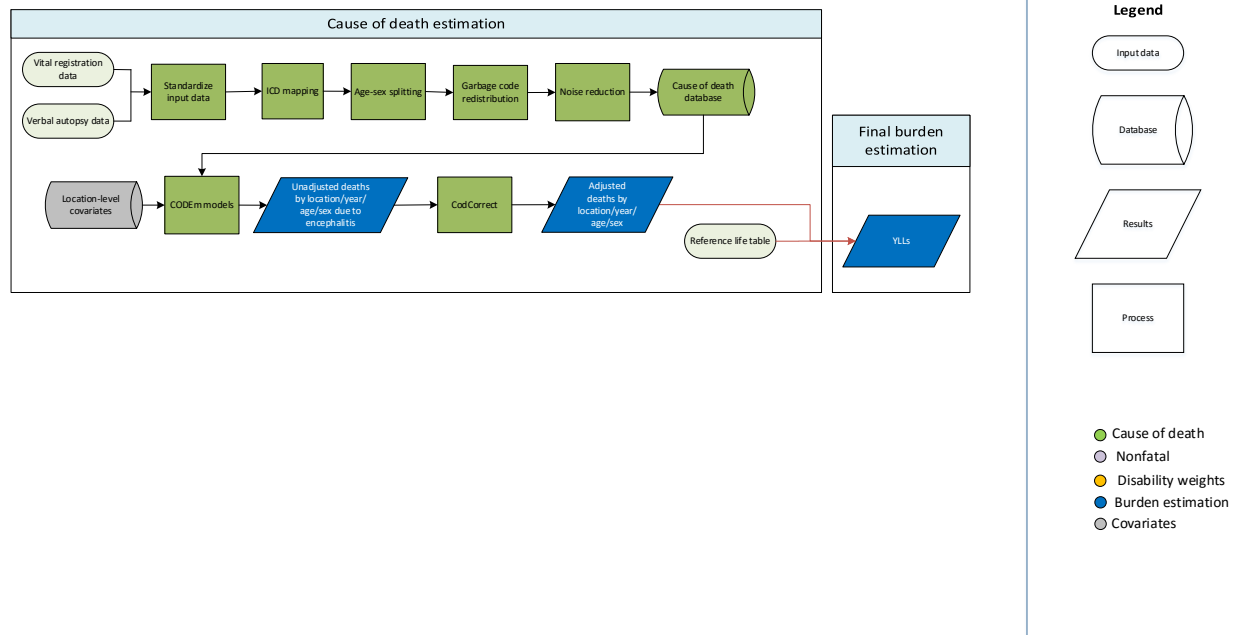

## Input data

For GBD 2016, vital registration (VR) and verbal autopsy (VA) data were used to model this cause. We outliered data in instances where garbage code redistribution and noise reduction, in combination with small sample sizes, resulted in unreasonable cause fractions when compared to regional, super-regional, and global rates, and data that violated well-established time or age trends. Outliering methods were consistent across both vital registration and verbal autopsy data.

## Modelling strategy

We modelled deaths due to encephalitis with a standard CODEm model using the cause of death database and location-level covariates as inputs. We hybridized separate global and data-rich models to acquire unadjusted results, which were adjusted using CodCorrect to reach final years of life lost (YLLs) due to encephalitis.

In GBD 2013, the encephalitis model was modelled using two age categories – under-5 and 5 years and above – because the mortality trends differed substantially between children and adults and a significant number of data sources only had data for under-5-year-olds. With the addition of new data sources for GBD 2015, this modelling process was deemed unnecessary and the encephalitis model covered the entire age range. Another significant change was the addition of the Japanese encephalitis covariate, which is a binary covariate indicating if the location is known to be endemic for Japanese encephalitis. The covariate was modelled according to data from the Centers for Disease Control and Prevention.<sup>1</sup>

We made no other significant changes to input data or modelling strategy for GBD 2016.

## Reference

1 Centers for Disease Control (CDC). CDC health information for international travel 2016: the yellow book. New York City, United States: Oxford University Press, USA, 2016.

# Diphtheria

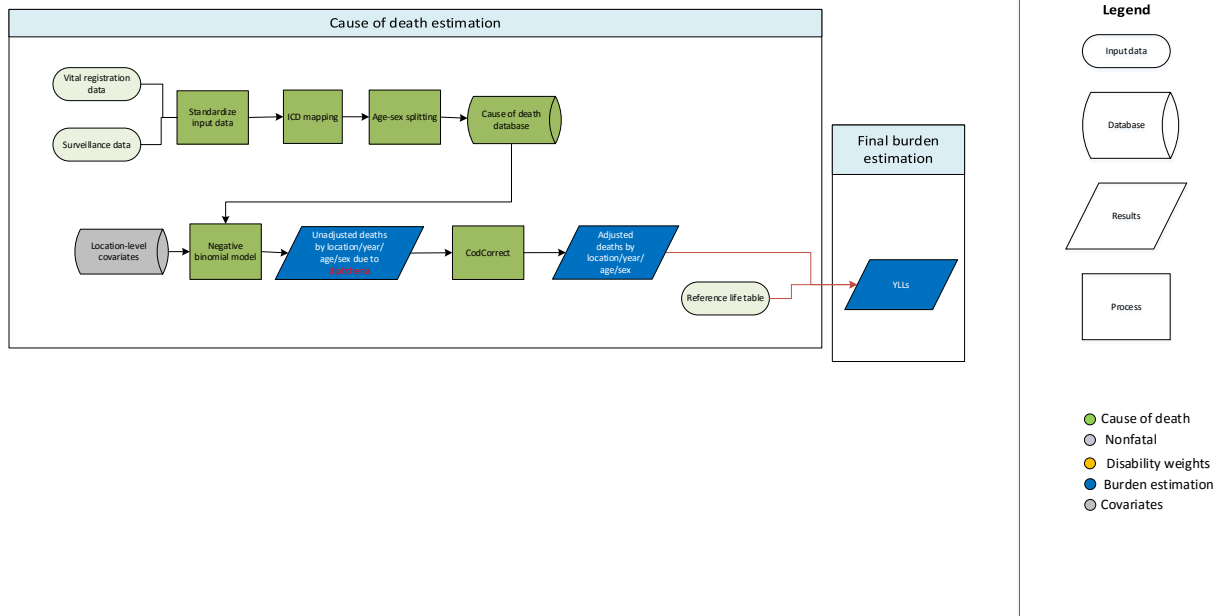

## Input data

Vital registration and surveillance data from the cause of death database were used. Data with very high cause fractions (those greater than the 99th percentile values) were excluded in the regression.

## Modeling strategy

Due to the small number of deaths, diphtheria mortality was modeled using a negative binomial regression, which is more appropriate than a Poisson count model as it accounts for greater variance (over-dispersion) in the data. Using the input data mentioned above, we modeled mortality due to diphtheria with the diphtheria-pertussis-tetanus third-dose (DPT3) vaccine coverage covariate and age dummy variables, with the offset as the total number of deaths in the study. Uncertainty was estimated by taking 1,000 iterations of the predictions based on the variance-covariance matrix and a random sample of the dispersion parameter from a gamma distribution.

## Pertussis (whooping cough)

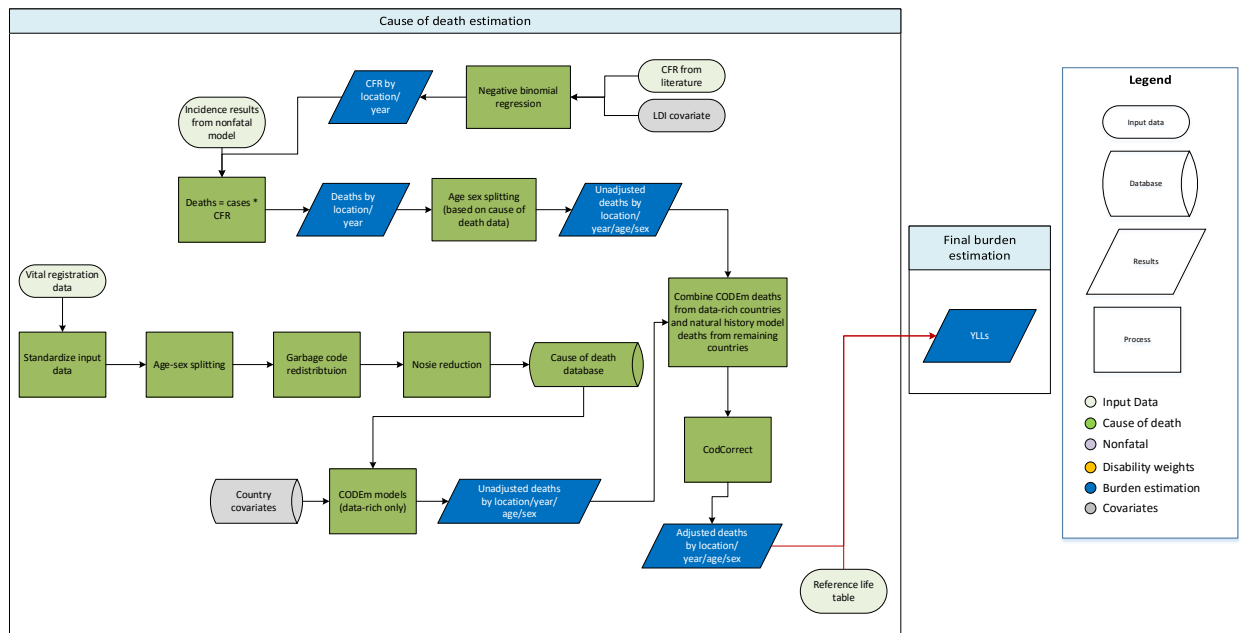

### Input data

Vital registration data from the cause of death database were used for data-rich countries. To inform the natural history model, we used data from the following sources: World Health Organization (WHO) case notifications; historical case notifications for the United Kingdom back to 1940; case fatality data identified by collaborators; and case fatality data identified through systematic literature reviews for GBD 2010, GBD 2013, and GBD 2016. The PubMed search query for GBD 2016 was: (whooping cough [Title/Abstract]) OR (pertussis [Title/Abstract]) AND (case fatality [Title/Abstract]) AND ("2013"[Date - Publication]: "2016"[Date - Publication]). Studies were included if they reported case fatality rate, number of deaths, and number of cases. Studies were excluded if they included non-representative samples only.

### Modeling strategy – data-rich countries

Mortality was modeled separately for data-rich and other countries. For data-rich countries (i.e., countries with vital registration more than 95% complete for more than 25 years), we used a general CODEm strategy with DTP3 vaccination coverage, lagged distributed income, and education as country-level covariates. We made estimations for the age range post-neonatal to 59 years.

### Modeling strategy – other countries

For the remaining countries, we used a natural history-based model because CODEm does not predict well for those countries. First, we modeled log-transformed incidence with a mixed-effects linear regression of case notifications from the WHO (1985-2015) on diphtheria-tetanus-pertussis dose 3 (DTP3) vaccination coverage. Historical data of United Kingdom (UK) pertussis cases and UK DTP3 coverage rates (both back to 1940) were also used to inform the incidence model. The random effect by



country allowed for registration completeness to vary by country. The results of this model were then used to predict incidence as a function of vaccine coverage. To correct for underreporting in case notifications, we used a value of the random effect that matched the highest random effect in a high income region—Switzerland (which has a pertussis monitoring system which captures a high percentage of cases)—to get an implied attack rate assumed to be the same for all unvaccinated populations. Uncertainty was estimated by taking 1,000 iterations of the predictions based on the variance-covariance matrix.

Second, we modeled the pertussis case fatality rate using a negative binomial model with the health system access and lagged-distributed income covariates. Uncertainty was estimated by taking 1,000 iterations of the predictions based on the variance-covariance matrix and a random sample from a gamma distribution of the dispersion parameter. Finally, whooping cough deaths were calculated at the 1,000-draw level as

$$deaths = incidence * CFR .$$

We estimated overall number of deaths and then assigned an age-sex distribution based on the age- and sex-specific patterns found in the cause of death data. We made estimations for the age range post-neonatal to 59 years.

# Tetanus

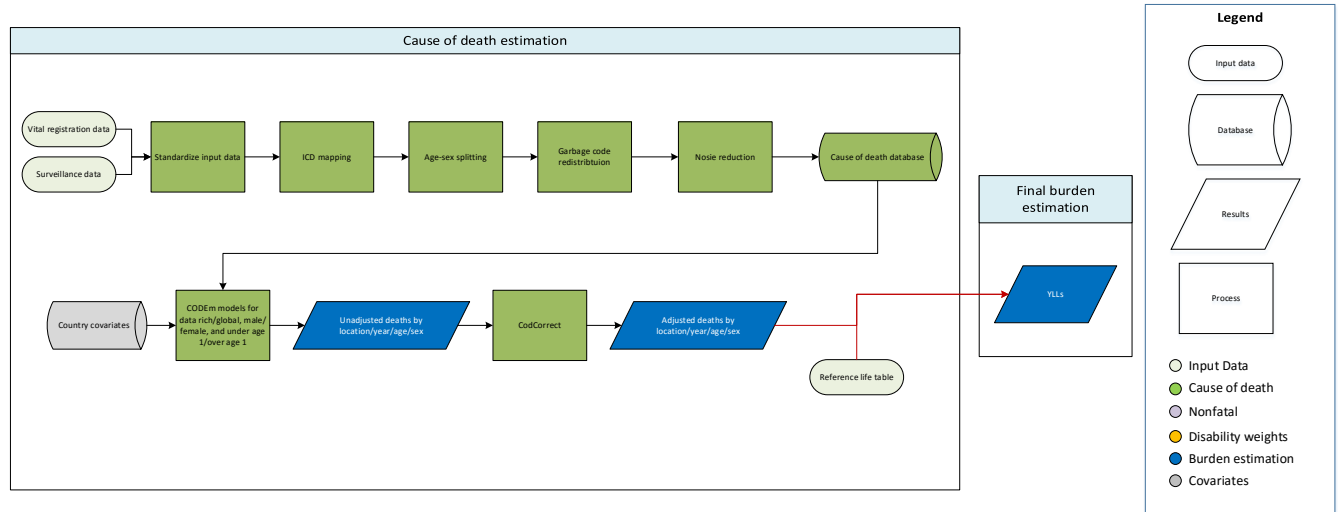

## Input data

Mortality data from vital registration, verbal autopsy, and surveillance sources were used. Data were outliered if they largely conflicted with the majority of data from other studies conducted either in the same or different countries with similar sociodemographic characteristics in the same region.

## Modeling strategy

A general CODEm modeling strategy was used. We ran separate models for under 1 year and 1 to 95+ years. There were no substantive changes in modeling strategy from GBD 2015.

# Measles

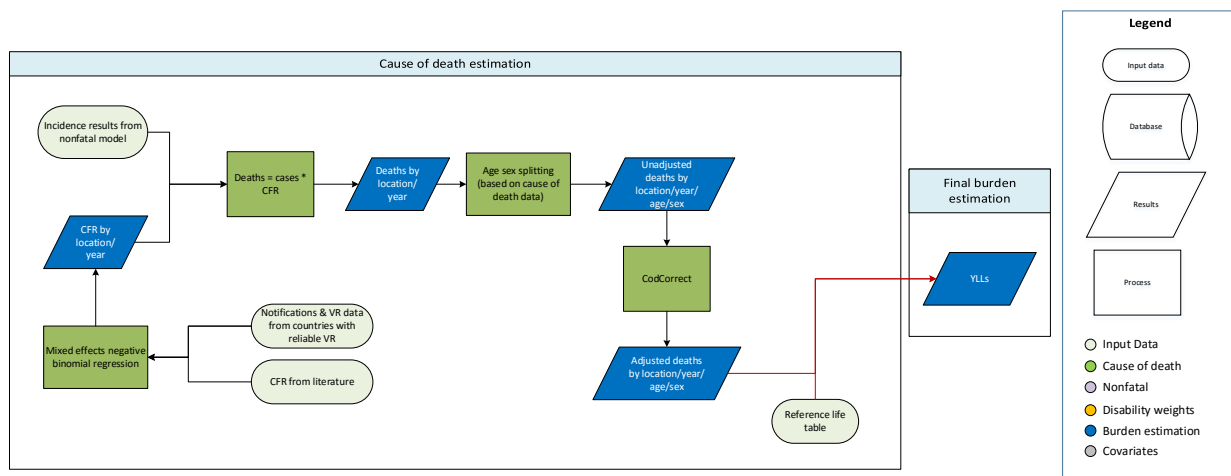

## Input data

Vital registration data from the cause of death database were used for data-rich countries. To inform the natural history model, we used data from the following sources: World Health Organization (WHO) case notifications from 1995 to 2015; case notifications identified by collaborators; vital registration (VR) data in countries in the following three super-regions: high-income, Central Europe/Eastern Europe/Central Asia, and Latin America and Caribbean; and case fatality data identified through systematic literature reviews for GBD 2010, GBD 2013, and GBD 2016. The PubMed search query for GBD 2016 was: (measles [Title/Abstract]) AND (case fatality [Title/Abstract]) AND ("2013"[Date - Publication]: "2016"[Date - Publication]). Studies were included if they reported case fatality rate, number of deaths, and number of cases. Studies were excluded if they included non-representative samples only.

## Modeling strategy – data-rich countries

Mortality was modeled separately for data-rich and other countries. For data-rich countries (i.e., countries with vital registration more than 95% complete for more than 25 years), we used a general CODEm strategy to model VR data with measles-containing vaccination dose one (MCV1) coverage, childhood malnutrition, lagged distributed income the healthcare access and quality index, and education as country-level covariates. We made estimations for the age range post-neonatal to 59 years.

## Modeling strategy – other countries

Measles mortality in the remaining countries was modeled using a natural-history-based model. First, we modeled measles incidence with a mixed-effects linear regression of case notifications from the WHO (1995-2015) on routine measles vaccination rates and supplementary immunization activities (SIAs). More precisely, log-transformed incidence rates were regressed on the log of the proportion unvaccinated with first- and second-dose measles-containing vaccine, and additional SIA coverage lagged by one, two, three, four, and five years, with super-region, region, and country-level random effects. The results of this mixed effects regression model were then used to predict location-year-

specific incidence as a function of routine vaccine coverage and SIAs. To correct for underreporting in case notifications, we added the effect of a 95% attack rate, assumed to be the same across all unvaccinated populations. Uncertainty was estimated by taking 1,000 iterations of the predictions based on the variance-covariance matrix. For locations in three super-regions—high-income, Central Europe/Eastern Europe/Central Asia and Latin America and Caribbean—we used reported measles cases as incident cases.

Second, the case fatality rate was modeled using a mixed effects negative binomial regression with the child malnutrition covariate and study-level indicators (hospital-based or not; outbreak or not; and rural or urban/mixed), with country random effects. Uncertainty was estimated by taking 1,000 iterations of the predictions based on the variance-covariance matrix and uncertainty in country random effects. The fit of the model was evaluated using diagnostic plots of predicted versus observed values. Finally, estimated deaths were calculated at the 1,000-draw level as

$$deaths = incidence * CFR .$$

We estimated overall number of deaths and then assigned an age-sex distribution based on the age- and sex-specific patterns found in the cause of death data. We made estimations for the age range post-neonatal to 59 years.

# Varicella

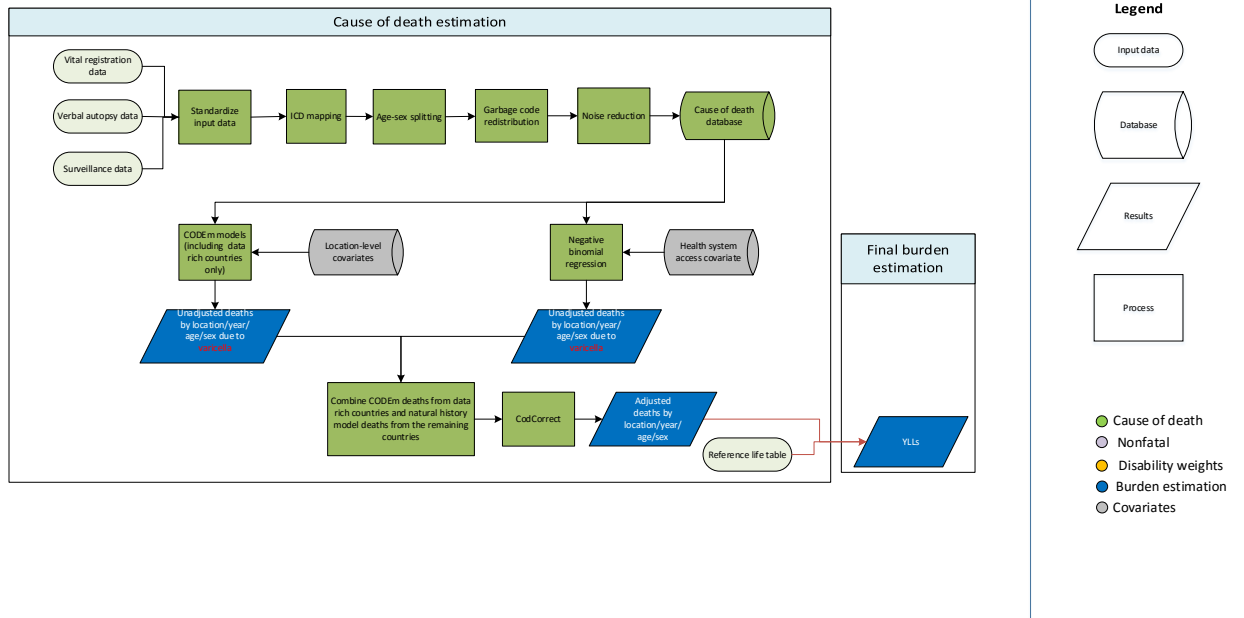

## Input data

Vital registration, verbal autopsy and surveillance data from the cause of death database were used. Data with very high cause fractions (those greater than the 99th percentile values) were excluded in the negative binomial regression.

## Modeling strategy

Mortality was modeled two ways. For data-rich countries (i.e., countries with vital registration more than 95% complete for more than 25 years), we used a general CODEm strategy. For the remaining countries, since CODEm did not predict well in data-sparse areas, we used a negative binomial regression to model varicella cause fraction. Using the input data mentioned above, we modeled mortality due to varicella using the healthcare access and quality index and age dummy variables with the offset set to the location-year-age-sex-specific population. Uncertainty was estimated by taking 1,000 iterations of the predictions based on the variance-covariance matrix and a random sample of the dispersion parameter from a gamma distribution.

In GBD 2013, we used a negative binomial regression to model varicella mortality for all countries. For GBD 2015, we switched to using CODEm for data-rich countries because it fit the data better in those countries. There were no significant changes in modeling strategy for GBD 2016 from GBD 2015.

# Malaria

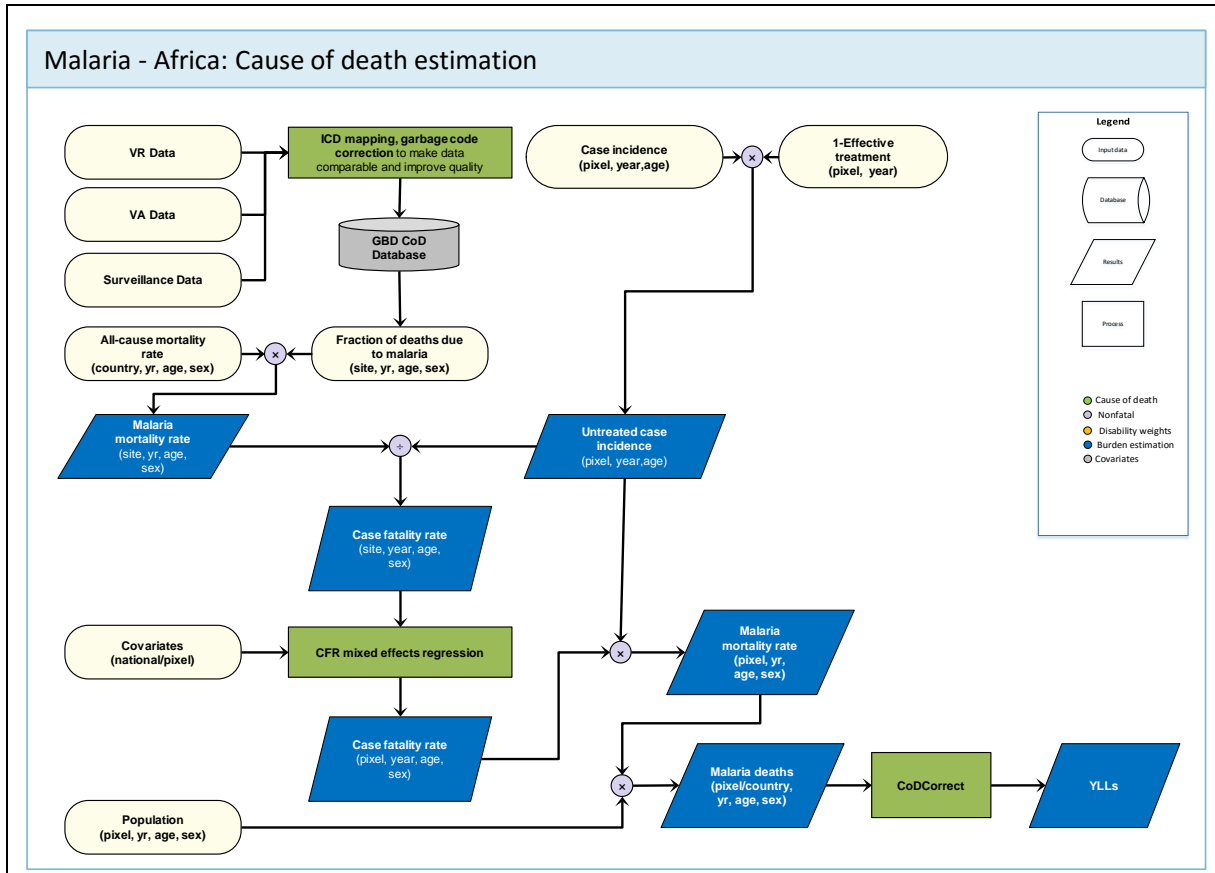

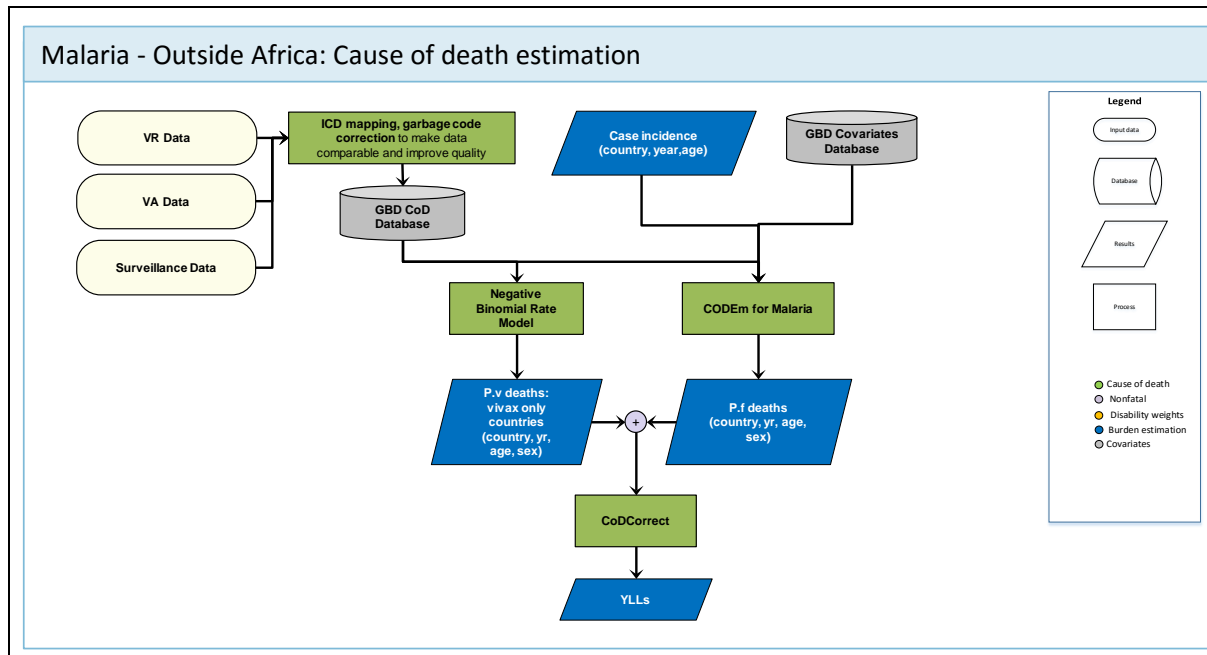

## Input data and methodological summary for malaria

### Overview

Variability in the type and abundance of CoD and related data meant that three distinct approaches were developed to estimate malaria mortality due to (i) *Plasmodium falciparum* inside Africa; (ii) *P. falciparum* outside Africa; and (iii) *P. vivax* in countries without falciparum malaria.

### Input data

For the Outside of Africa and *P. vivax* models, data included vital registration, verbal autopsy, and surveillance data from the cause of death (CoD) database. Unlike other causes of death, we did not redistribute deaths to malaria. For the Africa models, we only used CoD data (mostly verbal autopsy) where we have been able to successfully geo-reference (ie, find latitude and longitude) the site. Systematic literature reviews for malaria were not conducted.

Our outlier criteria excluded data points that (i) were implausibly high or low relative to global or regional patterns, (ii) substantially conflicted with established age or temporal patterns, or (iii) significantly conflicted with other data sources conducted from the same locations or locations with similar characteristics (ie, local Socio-demographic Index).

### Modelling strategy

As described above, the malaria modelling strategy was carried out in three parts.

#### ***P. falciparum*: Africa**

For most GBD causes, epidemiologic measures may be used as covariates in a traditional CODEm approach, if at all. To estimate the fatal burden of *P. falciparum* malaria in Africa, we directly used epidemiologic measures in our estimation process. The Malaria Atlas Project (MAP) at the University of Oxford has generated updated spatiotemporal “cubes” estimating clinical incidence (rates and case counts) for each 5x5 km pixel across Africa, by year, from 1980 to 2015, specified by three broad age-

bins (0–5, 5–14 and 15+). MAP has also generated an equivalent spatiotemporal prediction of access to effective antimalarial drugs (combining access to care, the fraction of malaria cases receiving different classes of antimalarial, and the estimated country-year-specific efficacy of each antimalarial class though time). This estimated treatment rate was combined with the incidence rate cube to derive a third cube estimating the incidence of untreated cases.

For each site-year for which CoD malaria cause fraction data were available we (i) estimated a site-year-specific malaria mortality rate as the product of malaria cause fraction and all-cause mortality rate (with the latter drawn from national-level values); (ii) divided the malaria mortality rate by the site-year-specific estimate of untreated malaria incidence rate (drawn from the MAP cube) to estimate a site-year-specific case fatality rate (CFR) among untreated malaria cases. These derived site-year specific CFR values were then used in a mixed-effects regression model to estimate pixel-year CFR for each 5x5 km grid cell. The models used as covariates are the log of country-year all-cause mortality, pixel-year night-time lights, accessibility, and fractional land-cover classes, and study specific age and sex, with the location of each study site as a national-level random effect. Data were weighted by sample size (ie, the number of all-cause deaths observed in each study site-year).

Pixel-year predictions of CFR were then multiplied by the corresponding untreated incidence rate from the MAP cube to yield a pixel-year mortality rate estimate, which was then multiplied by pixel-year population to compute pixel-year malaria death counts. These were then aggregated to yield the required GBD national or subnational death estimates.

To disaggregate into GBD age-bins, we separately ran a traditional national-level CODEm model with covariates: prevalence of *P. falciparum* in 2–10 age group ( $PfPR_{2-10}$ ), *Pf* incidence rate, years of education, access to effective antimalarial drugs, and health system access. The resulting predicted age-patterns were used to split the country-year mortality estimates.

### ***P. falciparum*: Outside of Africa**

In locations outside of Africa, we continued to use a traditional CODEm approach, mirroring closely that used in GBD 2015. It must be noted that “outside of Africa” also included some countries on the continent of Africa with either very low incidence or relatively robust routine surveillance systems including Algeria, Egypt, Morocco, Comoros, Mauritius, Cape Verde, Sao Tome, Principe, Rwanda, Botswana, Namibia, Eritrea, Djibouti, and South Africa. The model included the following covariates: *Pf* incidence rate, access to effective antimalarial drugs.

### ***P. vivax*: countries without *P. falciparum* transmission**

For countries where the main/exclusive strain of malaria was *P. vivax*, deaths were estimated using a zero-inflated negative binomial mixed model where the outcome is study deaths. The model included as fixed effect the logarithm of mortality rate, age, and sex. Locations were included as random effects.

The results from the *P. vivax*, Outside of Africa, and Africa models were collated and uploaded in CODEm and marked as best model in order to incorporate the estimation in the CodCorrect algorithm.

## References

- 1 Bhatt S, Weiss DJ, Cameron E, *et al.* The effect of malaria control on *Plasmodium falciparum* in Africa between 2000 and 2015. *Nature* 2015; **526**: 207–11.



## Chagas disease

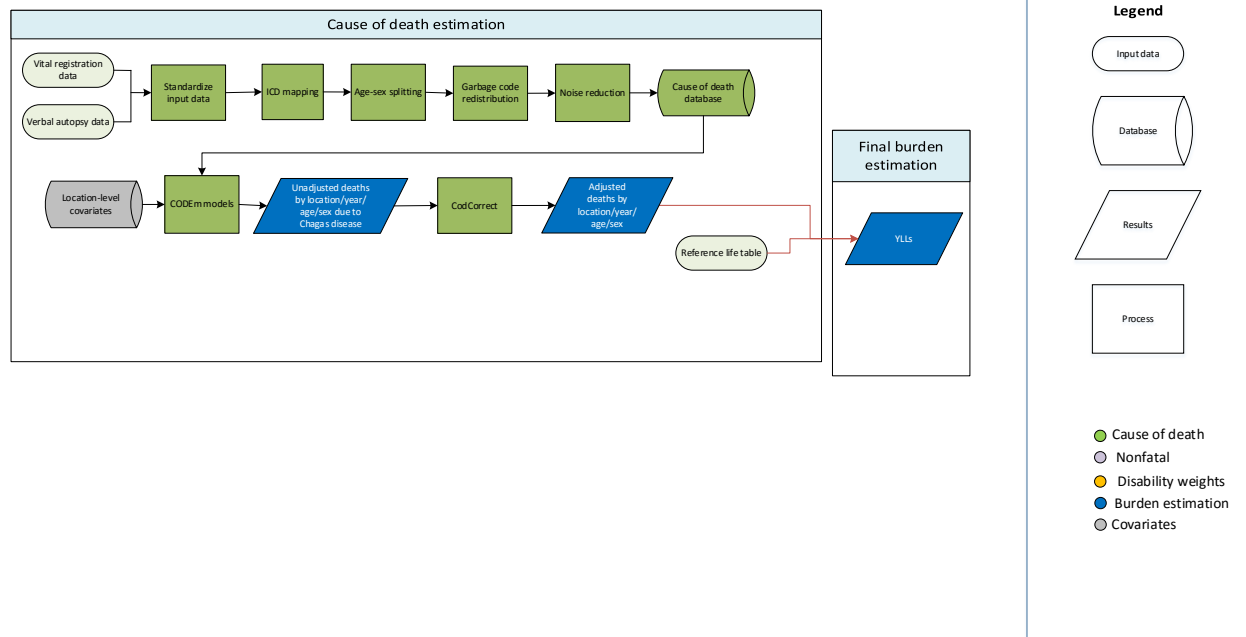

### Input data

We modeled Chagas mortality using all available data in the cause of death database. No data were outliered for this cause.

### Modelling strategy

We modelled Chagas mortality using a two-model hybrid approach: 1) a CODEm model of all Chagas-endemic countries of Latin America using all data in the CoD database; and 2) estimates of mortality from imported cases in non-endemic, data-rich countries. Where Chagas deaths were reported in non-endemic data-rich countries, we produced non-zero estimates by drawing from a beta distribution defined based on number of reported deaths and the underlying sample size. Estimates of Chagas mortality in endemic countries were drawn from the CODEm model.

We have made no substantive changes in the modelling strategy from GBD 2015 to GBD 2016 for Chagas endemic countries.

## Visceral leishmaniasis

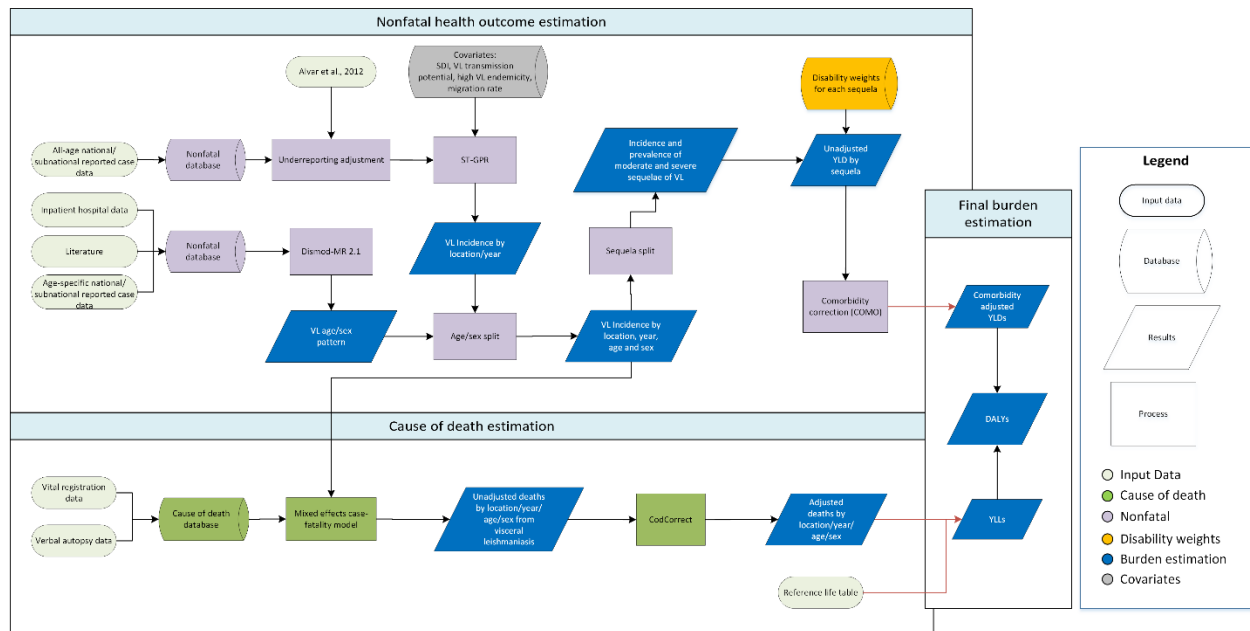

### Input data

Model inputs included incidence estimates derived primarily from reported case data, and cause-specific mortality data from the cause of death (CoD) database, including vital registration and verbal autopsy data.

### Modelling strategy

We estimate VL mortality using a mortality-to-incidence (MI) ratio model. For every VL data point in the cause of death database, we calculate the implied MI ratio as the number of reported VL deaths divided by our corresponding estimate of the number of VL cases. We then model logit-transformed MI ratios using a mixed-effects regression model with fixed effects on age group and sex; and random intercepts on super-region, random slope on sex by super-region, random intercepts on country (nested within super-region), and random slope on age group by country. Finally, we estimate deaths for every location, year, age and sex as the product of our estimates of VL incidence and the modelled MI ratios.

We have substantially revised this model for GBD 2016. Models for both GBD 2015 and GBD 2016 estimate mortality via a MI ratio approach; however, they differ both in the methods used to estimate VL incidence, and in the methods used to estimate MI ratios. Whereas GBD 2015 incidence estimates were derived from a DisMod model, we now estimate incidence via space-time Gaussian process regression (ST-GPR). This approach has the advantage of being able to estimate trends with more detail and accuracy, and of being able to more effectively utilize all-age data, which represent the majority of location-years of incidence data for VL. Moreover, previous iterations of GBD estimated MI ratios from location-years with matching VL hospital and mortality data. Our new approach to estimate MI ratios – based on using estimated incidence rather than hospital-based incidence – offers two advantages: first,

because matched hospital and CoD data are available for only a small number of VL endemic countries, the new approach allows us to leverage information for a much larger set of CoD data; and, second, because we model the relationship using total estimated incidence, rather than hospital-based incidence, our new approach requires no assumptions be made regarding the relationship between total incidence and hospital-based incidence.

# Human African Trypanosomiasis (HAT)

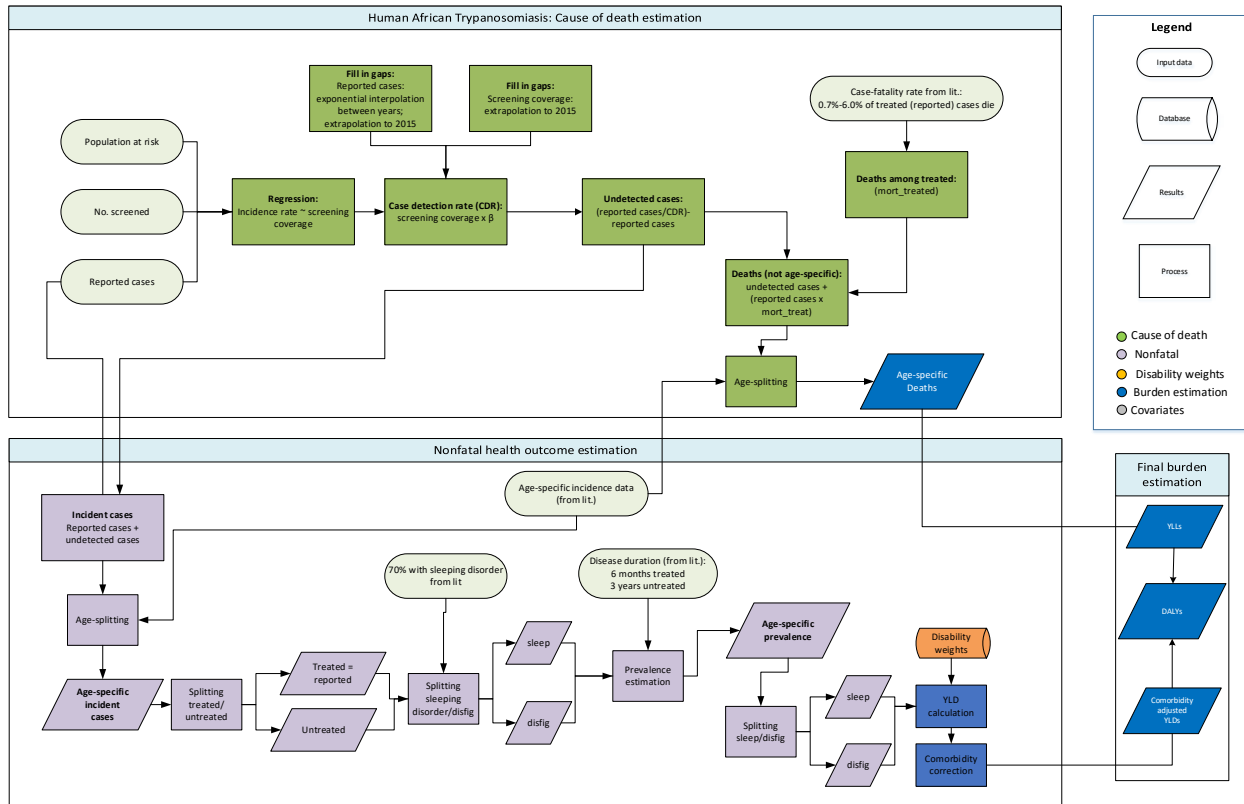

## Input data

A literature search was done for GBD 2013 and for GBD 2015. The GBD 2015 search was conducted between 1/1/2013 and 8/10/2015, and the number of initial hits was 87. Of these, five sources were extracted for data. The literature search was updated by reviewing all publications from 2016; of the 138 sources reviewed, one additional source was identified to describe the age/sex distribution of HAT infection.

Additional input data used to estimate mortality due to HAT included a) population at risk estimates from GBD 2010 ArcGIS analysis using geocoded case notifications for 2000 to 2009<sup>1</sup> and population Count Grid estimates from Gridded Population of the World 3,<sup>2,3</sup> b) population screened from 1997 to 2004,<sup>4</sup> c) historical data from GBD 2010 on total number of HAT cases reported<sup>1,4,5</sup> and d) cases reported annually to the WHO<sup>6</sup> – for Kenya, a study on cases reported subnationally<sup>7</sup> was used to split the national cases into five counties (HomaBay, Migori, Busia, Bungoma, Kakamega). In addition, age-specific incidence data from active screening undertaken in the Democratic Republic of Congo<sup>8</sup> and Uganda<sup>9</sup> were used to inform age pattern for deaths.

Data on the number of cases identified through active screening were obtained from a Weekly Epidemiological Record report<sup>4</sup> for *T.b. gambiense* HAT reported from 1997-2004 which reported active case finding data for the following countries: The Gambia, Ghana, Guinea Bissau, Liberia, Niger, Sierra Leone, and Senegal. No active case detection screening coverage data are currently available for *T.b. rhodesiense* HAT-endemic countries.

National case data from 1990-2015 were obtained from the World Health Organization's official surveillance data (available via the Global Health Observatory).

Based on available historical data post-1980, the following countries (years) were included in the estimation: Botswana (1983), Ethiopia (1980-1983), Guinea-Bissau (1980-1983, 1985-1987), Rwanda (1980, 1982-1988), and Sierra Leone (1981-1982). Five subnational locations (out of 49) for Kenya were also added in the estimation for GBD 2016.

### Modeling strategy

The cause of death model for HAT is implemented as follows:

1. The incidence of reported HAT cases among the population at risk was calculated as the total number of reported cases divided by the population at risk.
2. To estimate the number of cases that were likely undetected by country and year, a multi-level mixed-effects linear regression of natural log-transformed incidence rate (ratio of reported HAT cases to population at risk) on natural log-transformed screening coverage (ratio of number screened for HAT to population at risk), with country random effects, was performed. Gaps were then filled using exponential interpolation between years and extrapolation from 2015 to 2016 for reported cases. This model generates a beta-coefficient which is used to estimate the case detection rate (see step 4).

For country-years in which no screening coverage data were reported:

- Among countries with data reported, 1997-2004, the proportion of the at risk population screened from 1997 was used retrospectively for the period 1990-1996 and the screening coverage from 2004 was carried forward from 2005-2016.
  - For countries with no screening data reported, the mean screening coverage for the region was used to impute a value over time.
3. To construct an estimate of total deaths, we first assume that all detected cases receive treatment, and that mortality among the treated occurs for a small proportion of cases. Deaths among detected cases is estimated by generating one thousand draws of mortality among treated cases, assuming that between 0.7% - 6.0% of all treated (reported) cases die.<sup>10-12</sup>
  4. We then assume that all undetected cases experience mortality. This is estimated via generation of 1,000 draws of the case detection rate (CDR), given the expected screening coverage from the regression (in Step 2). Undetected deaths were then estimated as the difference between the ratio of reported cases to CDR and reported cases (reported cases/CDR – reported cases).
  5. Estimates of death were obtained by adding the reported cases (scaled by mortality among treated) to the undetected cases. Without information on sex-specific incidence or deaths, equal death rates between both sexes was assumed.
  6. Finally, an age-pattern was applied to the mortality estimates using the incidence studies from DRC and Uganda.<sup>8,9,13</sup> The age-pattern in GBD 2016 employed a cubic spline to account for the higher risk of infection among working age adults (as opposed to GBD 2015 in which a step-function at age 20 years was employed to differentiate risk).

## References:

- 1 Simarro PP, Cecchi G, Paone M, *et al.* The Atlas of human African trypanosomiasis: a contribution to global mapping of neglected tropical diseases. *Int J Health Geogr* 2010; **9**: 57.
- 2 Gridded Population of the World (GPW), Version 3: Population Count Grid. Palisades, NY: Socioeconomic Data and Applications Center (SEDAC); Center for International Earth Science Information Network (CIESIN) at Columbia University; Centro Internacional de Agricultura Tropical (CIAT), 2005.
- 3 Gridded Population of the World (GPW), Version 3: Population Count Grid, Future Estimates. Palisades, NY: Socioeconomic Data and Applications Center (SEDAC); Center for International Earth Science Information Network (CIESIN) at Columbia University; United Nations Food and Agriculture Programme (FAO); Centro Internacional de Agricultura Tropical (CIAT), 2005.
- 4 Weekly Epidemiological Record (WER). World Health Organization, 2006.
- 5 World Health Organization, Department of Communicable Disease Surveillance and Response (CDS). WHO Report on Global Surveillance of Epidemic-prone Infectious Diseases. World Health Organization, 2000.
- 6 World Health Organization. Human African Trypanosomiasis. Global Health Observatory data repository. <http://apps.who.int/gho/data/node.main.A1635?lang=en> (accessed April 21, 2016).
- 7 Rutto JJ, Karuga JW. Temporal and spatial epidemiology of sleeping sickness and use of geographical information system (GIS) in Kenya. *J Vector Borne Dis* 2009; **46**: 18–25.
- 8 Lutumba P, Makieya E, Shaw A, Meheus F, Boelaert M. Human African trypanosomiasis in a rural community, Democratic Republic of Congo. *Emerging Infect Dis* 2007; **13**: 248–54.
- 9 Fèvre EM, Odiit M, Coleman PG, Woolhouse MEJ, Welburn SC. Estimating the burden of rhodesiense sleeping sickness during an outbreak in Serere, eastern Uganda. *BMC Public Health* 2008; **8**: 96.
- 10 Balasegaram M, Harris S, Checchi F, Ghorashian S, Hamel C, Karunakara U. Melarsoprol versus eflornithine for treating late-stage Gambian trypanosomiasis in the Republic of the Congo. *Bull World Health Organ* 2006; **84**: 783–91.
- 11 Odiit M, Kansime F, Enyaru JC. Duration of symptoms and case fatality of sleeping sickness caused by *Trypanosoma brucei rhodesiense* in Tororo, Uganda. *East Afr Med J* 1997; **74**: 792–5.
- 12 Priotto G, Kasparian S, Mutombo W, *et al.* Nifurtimox-eflornithine combination therapy for second-stage African *Trypanosoma brucei gambiense* trypanosomiasis: a multicentre, randomised, phase III, non-inferiority trial. *Lancet* 2009; **374**: 56–64.
- 13 Kato CD, Nanteza A, Mugasa C, Edyelu A, Matovu E, Alibu VP. Clinical profiles, disease outcome and co-morbidities among *T. b. rhodesiense* sleeping sickness patients in Uganda. *PLoS One*. 2015; **10**: e0118370.

# Schistosomiasis

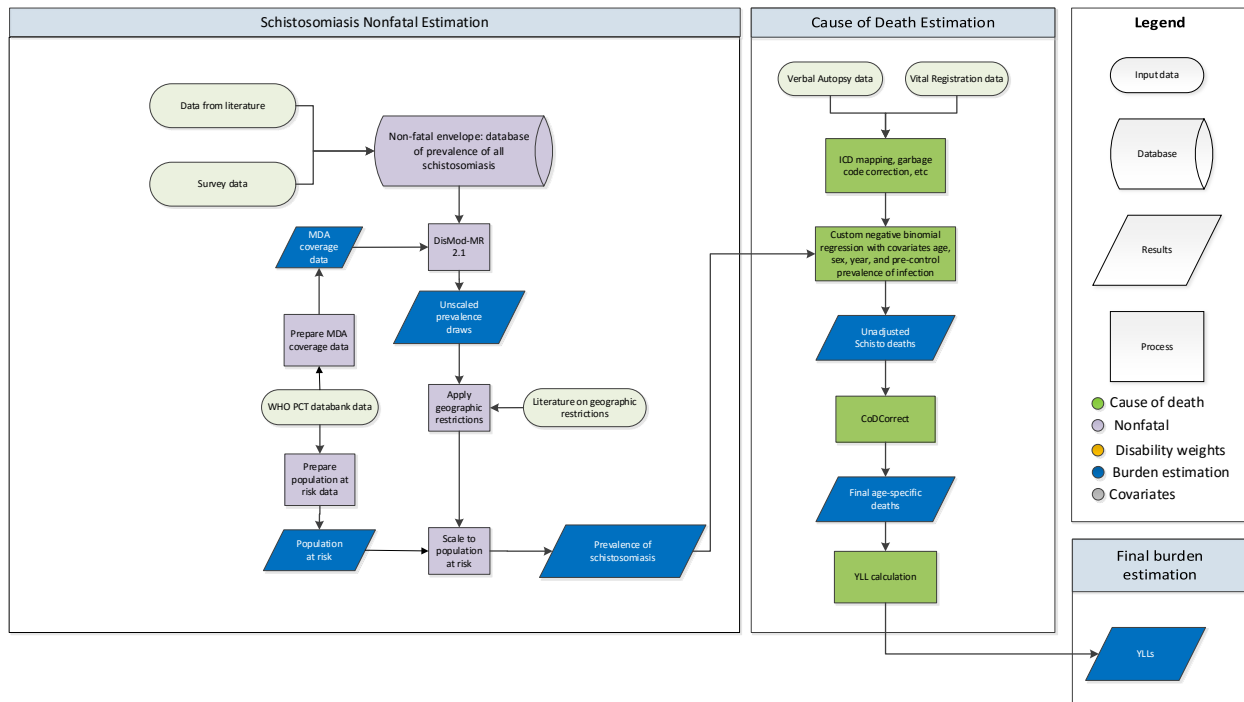

## Input data

To estimate mortality due to schistosomiasis, data on deaths and prevalence of infection were used. The prevalence data were prepared this year for GBD 2016, and further information on prevalence data is available in the nonfatal write-up for this cause. Country-year-age-sex-specific verbal autopsy and vital registration data were used in the mortality model.

## Geographic Restrictions

We conducted a literature review to determine the geographic extent of the disease and classify locations based on whether the disease is absent or present in each year. Locations that were geographically restricted in any given year did not have estimates made for them but could have imported cases attributed to them at a later stage. Of note, we did not attempt a complete systematic review, since a single high-quality source could offer sufficient evidence of presence. Evidence of absence or presence was not available for every location for each year and so assumptions were made for missing years by taking into consideration the epidemiological characteristics of the disease. If evidence indicated disease presence for two non-consecutive years, we assumed presence for all years between the two. If evidence indicated disease absence for two non-consecutive years, we assumed absence for all years between the two. If evidence indicated a change in status (i.e. from absent to present, or present to absent) between two non-consecutive years than we conducted targeted searches to ascertain the relevant year of introduction or elimination for that location. In the cases where presence or absence information was missing for the start or end years of our study interval (1990-2016) without evidence of any introduction or elimination events within the interval, we applied the status of the first and last presence/absence observations respectively to all years between the

interval bound and the observation year. For schistosomiasis, we used a combination of Chitsulo et al's *The global status of schistosomiasis and its control* (1) and WHO's *Preventative chemotherapy in human helminthiasis* (2) report as a baseline. Where country-level endemicity statuses conflicted between the two sources, we searched Pubmed and Google Scholar for country and subnational-specific endemicity status. Our search yielded 22 sources that were used to develop our annual geographic restriction map for schistosomiasis.

### **Modelling strategy**

To estimate deaths due to schistosomiasis, a negative binomial regression model of country-year-age-sex-specific deaths on natural log-transformed prevalence of total schistosomiasis infection with a 5-year lag was used. The negative binomial regression was selected due to its suitability for modelling count data. In addition, there are relatively low number of deaths attributable to schistosomiasis. Covariates for endemic Brazil subnationals and South Africa subnationals were used to allow the model to follow data in those areas. A multivariate normal distribution using the mean and variance-covariance matrix from the model was used to generate 1,000 draws of deaths due to schistosomiasis.

Models were evaluated by assessing the AIC and plotting the predicted deaths against time, age, and sex. In addition, the Cause of Death Visualization tool was used to evaluate time trends across locations, age, and sex. A map of the global distribution of schistosomiasis across age-groups was also used to assess the changes in death rates over time. The final model was selected based on how well the estimated numbers fit the input data and how plausible the predicted distribution of disease was over time and with age.

### **References**

- (1) Chitsulo, L., Engels, D., Montresor, A., & Savioli, L. (2000). The global status of schistosomiasis and its control. *Acta Tropica*, 77(1), 41-51. doi:10.1016/s0001-706x(00)00122-4
- (2) World Health Organization (2006). *Preventive chemotherapy in human helminthiasis : coordinated use of anthelmintic drugs in control interventions : a manual for health professionals and programme managers.*



# Cysticercosis

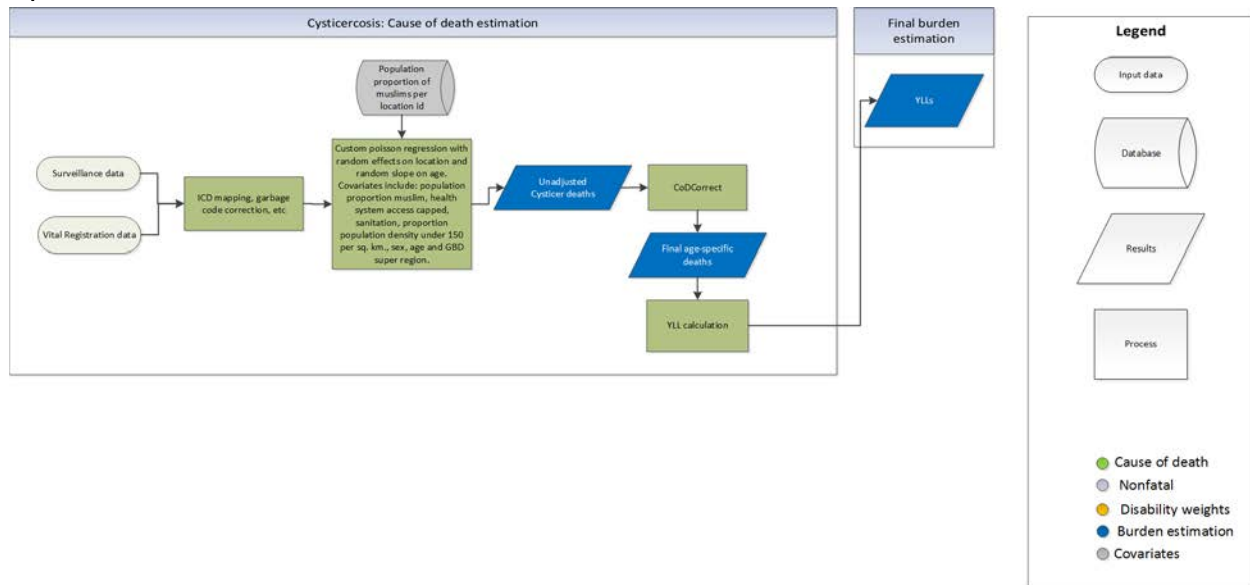

## Input data

The model for mortality due to cysticercosis relied on vital registration and surveillance data from endemic countries. In addition, we used data from the Pew Research Center on percentage of population that is Muslim by country. The primary covariates adjusted for in the model were proportion of the population that is Muslim, health system access capped, proportion of the population with access to sanitation, proportion of the country with population density under 150 people per square kilometer, sex, age and GBD super region.

## Geographic Restrictions

We conducted a literature review to determine the geographic extent of the disease and classify locations based on whether the disease is absent or present in each year. Locations that were geographically restricted in any given year did not have estimates made for them but could have imported cases attributed to them at a later stage. Of note, we did not attempt a complete systematic review, since a single high-quality source could offer sufficient evidence of presence. Evidence of absence or presence was not available for every location for each year and so assumptions were made for missing years by taking into consideration the epidemiological characteristics of the disease. If evidence indicated disease presence for two non-consecutive years, we assumed presence for all years between the two. If evidence indicated disease absence for two non-consecutive years, we assumed absence for all years between the two. If evidence indicated a change in status (i.e. from absent to present, or present to absent) between two non-consecutive years than we conducted targeted searches to ascertain the relevant year of introduction or elimination for that location. In the cases where presence or absence information was missing for the start or end years of our study interval (1990-2016) without evidence of any introduction or elimination events within the interval, we applied the status of the first and last presence/absence observations respectively to all years between the interval bound and the observation year. For cysticercosis, we performed targeted searches to classify

location-years in PubMed and Google Scholar. Our map was populated by 21 peer-reviewed articles and meta-analyses and WHO reports.

### **Modelling strategy**

Globally, deaths due to cysticercosis are relatively low. Therefore, a Poisson model was used to model cysticercosis deaths due to its suitability for count data. This model choice was validated by tests for overdispersion. Random effects were used on location with random slopes on age by location. A multivariate normal distribution using the mean and variance-covariance matrix from the model was used to generate 1,000 draws of deaths due to cysticercosis.

Estimates for new subnational locations were also added in GBD 2016. Since the Pew Research Center only has data on proportion of Muslims by country, we applied the national proportions to subnational locations. We understand that this does not account for sometimes large expected differences in proportions of Muslims within a country, but were limited by data availability.

## Cystic Echinococcosis (CE)

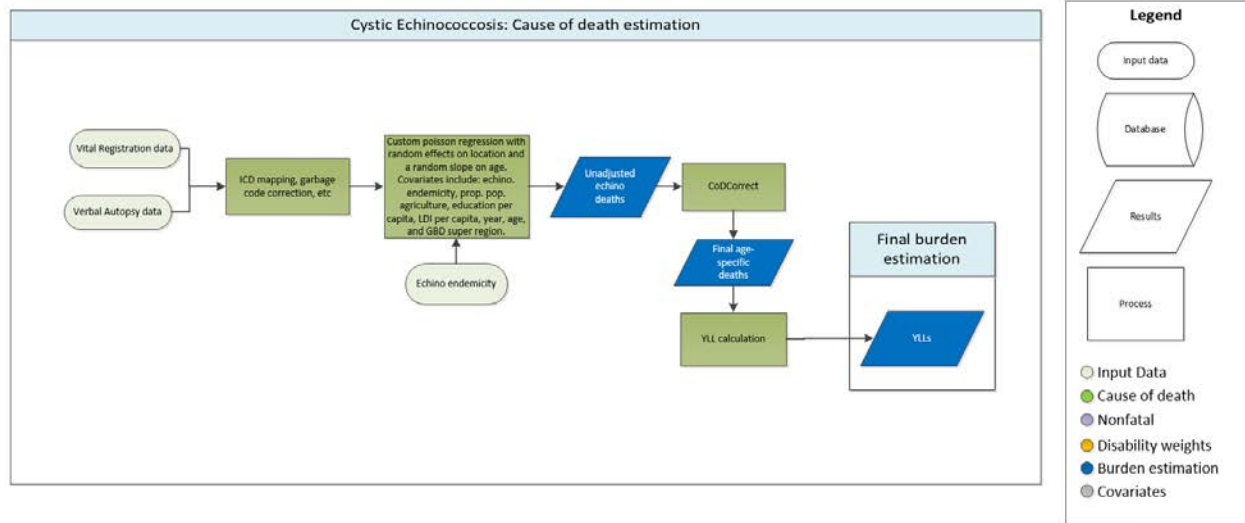

### Input data

There are limited data sources on deaths due to cystic echinococcosis (CE). The model relied on vital registration and hospital surveillance data from endemic countries. We incorporated a categorical measure of echinococcosis endemicity provided by one of our echinococcosis collaborators with four levels: 0=no cases/no data; 1=sporadic/mostly imported; 2=endemic/limited data; and 3=highly endemic. Other covariates included proportion of the population involved in agricultural activities, years of education per capita, lag distributed income per capita, age, year and GBD super region.

### Geographic Restrictions

We conducted a literature review to determine the geographic extent of the disease and classify locations based on whether the disease is absent or present in each year. Locations that were geographically restricted in any given year did not have estimates made for them but could have imported cases attributed to them at a later stage. Of note, we did not attempt a complete systematic review, since a single high-quality source could offer sufficient evidence of presence. Evidence of absence or presence was not available for every location for each year and so assumptions were made for missing years by taking into consideration the epidemiological characteristics of the disease. If evidence indicated disease presence for two non-consecutive years, we assumed presence for all years between the two. If evidence indicated disease absence for two non-consecutive years, we assumed absence for all years between the two. If evidence indicated a change in status (i.e. from absent to present, or present to absent) between two non-consecutive years then we conducted targeted searches to ascertain the relevant year of introduction or elimination for that location. In the cases where presence or absence information was missing for the start or end years of our study interval (1990-2016) without evidence of any introduction or elimination events within the interval, we applied the status of the first and last presence/absence observations respectively to all years between the interval bound and the observation year. For cystic echinococcosis, we performed targeted searches to classify location-years in PubMed and Google Scholar. Our map was populated by 23 peer-reviewed articles and meta-analyses.

### **Modelling strategy**

The cause of death ensemble model (CODEm) was not employed for modelling deaths from CE due to the paucity of data on deaths from CE. We therefore used a Poisson model to model deaths with random effects by location and a random slope on age by location. A multivariate normal distribution using the mean and variance-covariance matrix from the model was used to generate 1,000 draws of deaths due to cystic echinococcosis.

Using a multivariate normal distribution with mean and variance-covariance matrix from the Poisson regression, we generated 1,000 draws of estimates for the countries endemic for CE. The final model was selected based on how well the estimated numbers fit the input data and how plausible the predicted distribution of disease was over time and with age.

# Dengue

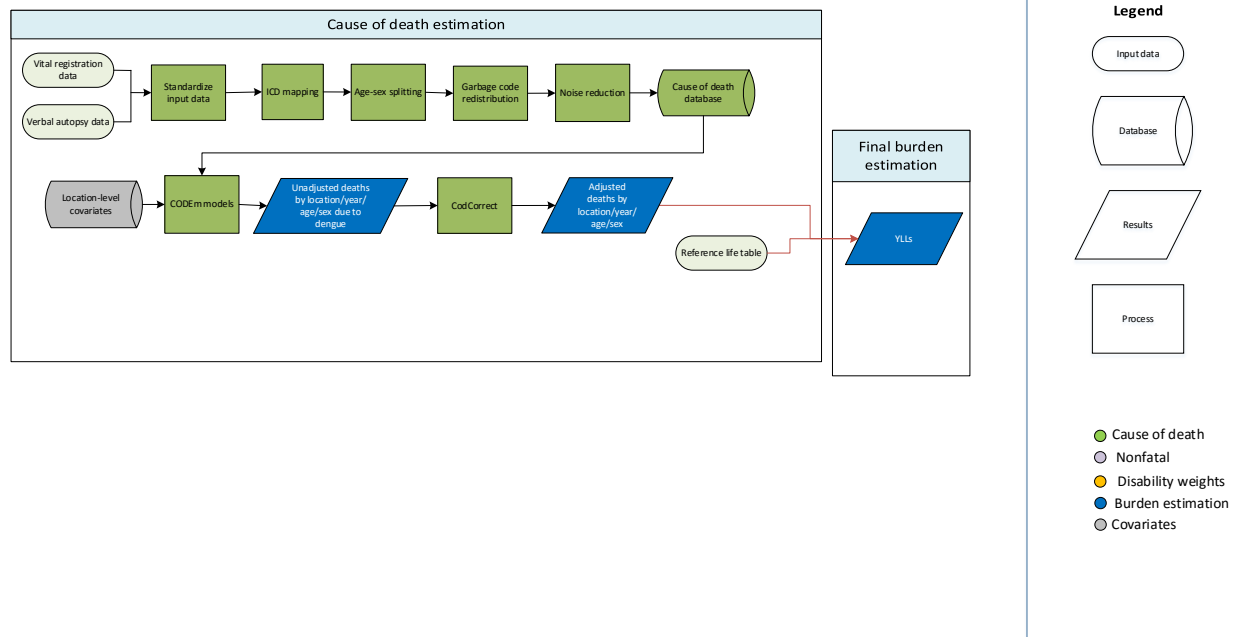

## Input data

We modelled dengue mortality using all available data in the cause of death database. Data points were outliered if they reported an improbably low number of dengue deaths (eg, zero dengue deaths in a hyper-endemic country) or an improbably high number of dengue deaths.

## Modelling strategy

We modelled dengue mortality using three-model hybrid approach: 1) a global CODEm model of all locations, using all data in the CoD database; 2) a CODEm model restricted to data-rich countries; and 3) estimates of mortality from imported cases in non-endemic, data-rich countries. Where dengue deaths were reported in non-endemic data-rich countries, we produced non-zero estimates by drawing from a beta distribution based on number of reported deaths and the underlying sample size. Estimates of dengue mortality in endemic data-rich countries were drawn from the data-rich CODEm model. Finally, estimates in other endemic countries were drawn from the global CODEm model.

While we've made no substantive changes to the modelling strategy in 2016, we have updated the geographic restrictions that determine whether a location is considered non-endemic (and, therefore, will have estimates based on the imported case model) in a given year. As for GBD 2015, we derived our geographic restrictions for 2010 from Brady et al(1). Whereas, in GBD 2015 we treated these as static restrictions, for GBD 2016 we conducted a literature review to determine locations and years in which dengue was introduced or eliminated, to allow for time-varying geographic restrictions. Of note, we did not attempt a complete systematic review, since a single high-quality source could offer sufficient evidence of presence. In total, we used 14 additional sources to supplement Brady et al's review.(2–15)

1. Brady OJ, Gething PW, Bhatt S, Messina JP, Brownstein JS, Hoen AG, et al. Refining the Global Spatial Limits of Dengue Virus Transmission by Evidence-Based Consensus. *PLoS Negl Trop Dis*. 2012 Aug 7;6(8):e1760.
2. Al ST et. Autochthonous Dengue Fever, Tokyo, Japan, 2014 - Volume 21, Number 3— March 2015 - *Emerging Infectious Disease journal - CDC*. [cited 2017 Apr 28]; Available from: [https://wwwnc.cdc.gov/eid/article/21/3/14-1662\\_article](https://wwwnc.cdc.gov/eid/article/21/3/14-1662_article)
3. Guzman MG, Kouri G. Dengue and dengue hemorrhagic fever in the Americas: lessons and challenges. *J Clin Virol*. 2003 May;27(1):1–13.
4. Boshell J, Groot H, Gacharna M, Márquez G, González M, Gaitán MO, et al. Dengue en Colombia. *Biomédica*. 1986;6(3–4):101–6.
5. Effler PV, Pang L, Kitsutani P, Vorndam V, Nakata M, Ayers T, et al. Dengue Fever, Hawaii, 2001–2002. *Emerg Infect Dis*. 2005 May;11(5):742–9.
6. McBride WJH. Dengue fever: is it endemic in Australia? *Intern Med J*. 2010 Apr 1;40(4):247–9.
7. Kay BH, Barker-Hudson P, Stallman ND, Wiemers MA, Marks EN, Holt PJ, et al. Dengue fever. Reappearance in northern Queensland after 26 years. *Med J Aust*. 1984 Mar 3;140(5):264–8.
8. Al GA et. Dengue Reemergence in Argentina - Volume 5, Number 4—August 1999 - *Emerging Infectious Disease journal - CDC*. [cited 2017 Apr 28]; Available from: [https://wwwnc.cdc.gov/eid/article/5/4/99-0424\\_article](https://wwwnc.cdc.gov/eid/article/5/4/99-0424_article)
9. Ramos MM, Mohammed H, Zielinski-Gutierrez E, Hayden MH, Lopez JLR, Fournier M, et al. Epidemic Dengue and Dengue Hemorrhagic Fever at the Texas–Mexico Border: Results of a Household-based Seroepidemiologic Survey, December 2005. *Am J Trop Med Hyg*. 2008 Mar 1;78(3):364–9.
10. Luo L, Liang H, Hu Y, Liu W, Wang Y, Jing Q, et al. Epidemiological, virological, and entomological characteristics of dengue from 1978 to 2009 in Guangzhou, China. *J Vector Ecol*. 2012 Jun 1;37(1):230–40.
11. Murray KO, Rodriguez LF, Herrington E, Kharat V, Vasilakis N, Walker C, et al. Identification of Dengue Fever Cases in Houston, Texas, with Evidence of Autochthonous Transmission Between 2003 and 2005. *Vector Borne Zoonotic Dis*. 2013 Dec 1;13(12):835–45.
12. Locally Acquired Dengue --- Key West, Florida, 2009--2010 [Internet]. [cited 2017 Apr 28]. Available from: <https://www.cdc.gov/mmwr/preview/mmwrhtml/mm5919a1.htm>
13. Bouri N, Sell TK, Franco C, Adalja AA, Henderson DA, Hynes NA. Return of Epidemic Dengue in the United States: Implications for the Public Health Practitioner. *Public Health Rep*. 2012;127(3):259–66.

14. Wilder-Smith A, Quam M, Sessions O, Rocklov J, Liu-Helmersson J, Franco L, et al. The 2012 dengue outbreak in Madeira: exploring the origins. 2014 [cited 2017 Apr 28]; Available from: <https://dr.ntu.edu.sg/handle/10220/19685>
15. Brathwaite Dick O, San Martín JL, Montoya RH, del Diego J, Zambrano B, Dayan GH. The History of Dengue Outbreaks in the Americas. *Am J Trop Med Hyg.* 2012 Oct 3;87(4):584–93.

# Yellow fever

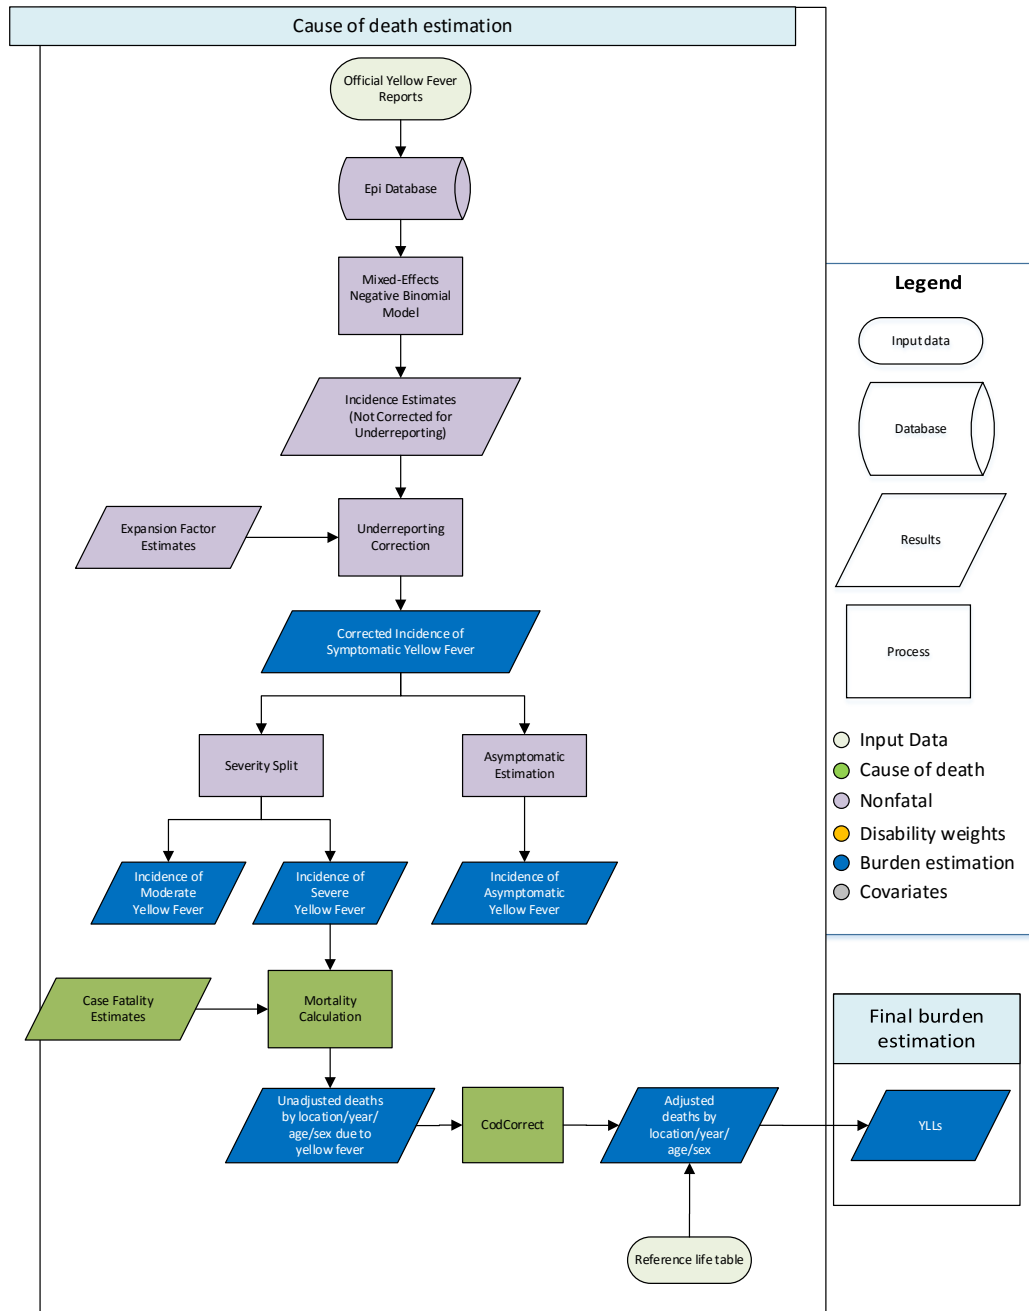

## Input data

Case data come from official case reports filed with the World Health Organization. Data on case fatality come from published studies of yellow fever fatality. Data on deaths in non-endemic countries are restricted to only vital registration data.



## Modelling strategy

We model yellow fever deaths using a hybrid approach. For countries in which yellow fever is endemic, we use a natural history approach in which we estimate deaths as the product of cases and case fatality. For non-endemic countries, we allow for deaths among imported cases where we have vital registration data indicating yellow fever deaths. That is, we assume no yellow fever deaths in non-endemic countries; however, where yellow fever deaths are reported in vital registration data, we accept those as true imported yellow fever deaths.

We model reported cases using a mixed-effects negative binomial model, with fixed effects for year and random effects for super-region, region, and country. We assume that yellow fever cases are underreported and that this underreporting mirrors that of dengue (a disease for which we have better data on underreporting). With that, we estimate symptomatic cases as the product of our base case estimates and dengue expansion factors (ie, the factor by which you must multiply reported cases to derive true cases). Based on published estimates, we assume that 27% of symptomatic cases will be severe.<sup>1</sup>

We performed a meta-analysis of case fatality using data from published studies of yellow fever fatality. Studies tend to report deaths among those with severe infection (eg, hospitalized cases), rather than among all cases. We assume that no deaths occur with asymptomatic infection or among those with only moderate symptoms. With that, we estimate deaths as the product of severe cases and case fatality.

We have improved our method for correcting for underreporting of yellow fever. In estimating yellow fever deaths for GBD 2013, our model assumed that all severe cases were reported and that reported cases reflected only severe cases. With that, we adjusted our base estimates upward to account for non-severe cases, and based our mortality estimates off these adjusted numbers. Based on feedback from collaborators, we believe that this adjustment was inadequate to fully account for underreporting. Accordingly, we have adopted the expansion factor-based method described above for GBD 2015.

Moreover, we have adopted the hybrid approach for GBD 2015. Whereas we previously allowed no yellow fever deaths in non-endemic countries, we now accept deaths reported in vital registration data as true imported deaths.

We have made no substantive changes to the modelling strategy for GBD 2016.

## Reference

1 Johansson MA, Vasconcelos PFC, Staples JE. The whole iceberg: estimating the incidence of yellow fever virus infection from the number of severe cases. *Trans R Soc Trop Med Hyg* 2014; 108: 482–7.

# Rabies

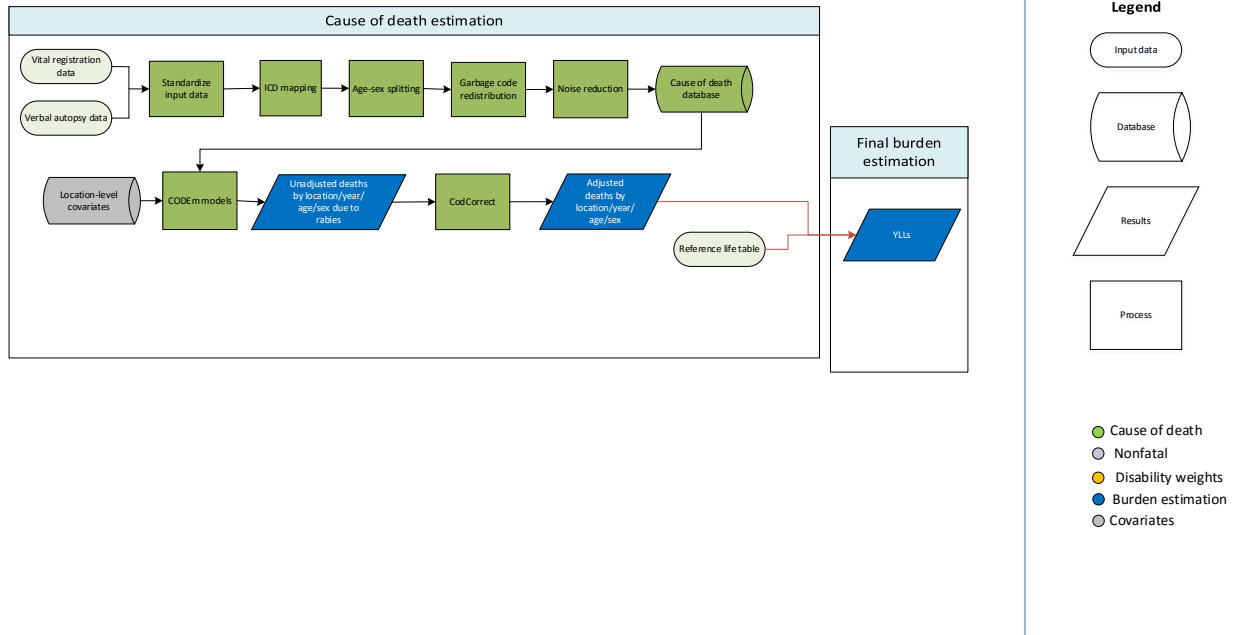

## Input data

We modeled rabies mortality using all available data in the cause of death database. Data points were outliered if they reported an improbable number of rabies deaths (e.g., zero rabies deaths in a hyper-endemic country) or if their inclusion in the model yielded distorted trends. In some cases multiple data sources for the same location differed dramatically both in their quality and reported rabies mortality (e.g., a verbal autopsy and vital registration source). In these cases the lower-quality data source was outliered.

## Modeling strategy

We modeled rabies mortality using a two-model hybrid approach: 1) a global CODEm model of all locations, using all data in the CoD database; and 2) a CODEm model restricted to data-rich countries.

We have made no substantive changes to the modeling strategy in 2016.

## Ascariasis

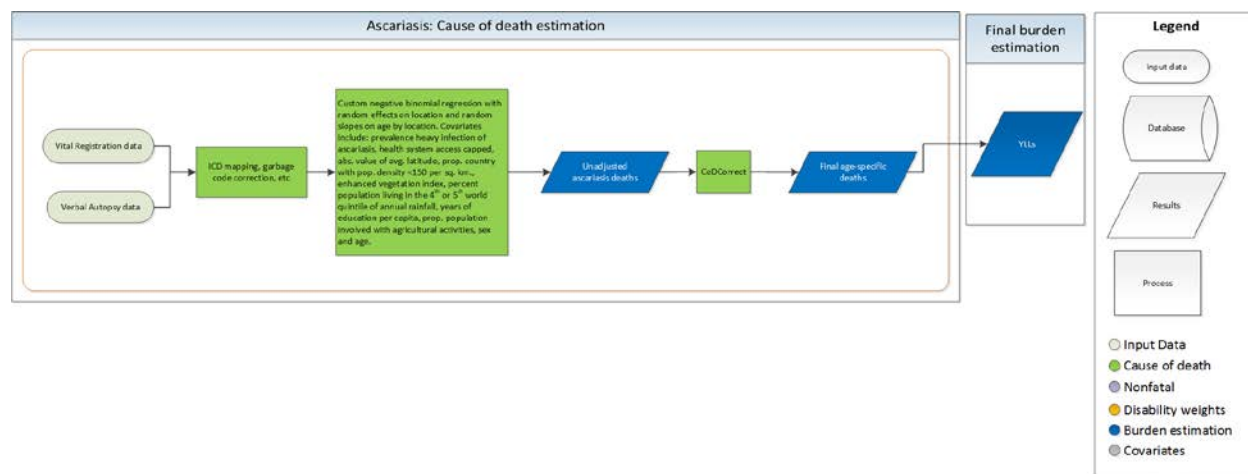

### Input data

To estimate mortality due to ascariasis, country-year-age-sex-specific verbal autopsy and vital registration data were used. Covariates used include prevalence of heavy infection of ascariasis, health system access capped by the minimum OECD value, the absolute value of average latitude, the proportion of the country with population density under 150 people per square kilometer, enhanced vegetation index, percent of the population living in the 4<sup>th</sup> or 5<sup>th</sup> world quintile of annual rainfall, number of years of education per capita, proportion of the population involved with agricultural activities, sex and age.

### Geographic Restrictions

We conducted a literature review to determine the geographic extent of the disease and classify locations based on whether the disease is absent or present in each year. Locations that were geographically restricted in any given year did not have estimates made for them but could have imported cases attributed to them at a later stage. Of note, we did not attempt a complete systematic review, since a single high-quality source could offer sufficient evidence of presence. Evidence of absence or presence was not available for every location for each year and so assumptions were made for missing years by taking into consideration the epidemiological characteristics of the disease. If evidence indicated disease presence for two non-consecutive years, we assumed presence for all years between the two. If evidence indicated disease absence for two non-consecutive years, we assumed absence for all years between the two. If evidence indicated a change in status (i.e. from absent to present, or present to absent) between two non-consecutive years than we conducted targeted searches to ascertain the relevant year of introduction or elimination for that location. In the cases where presence or absence information was missing for the start or end years of our study interval (1990-2016) without evidence of any introduction or elimination events within the interval, we applied the status of the first and last presence/absence observations respectively to all years between the interval bound and the observation year. Our search was done in conjunction with the title/abstract screening portion of a systematic literature review for prevalence data. The search strings and yield can be viewed in the table below for each of the databases queried.

| Database | Search String | Yield |
|----------|---------------|-------|
|----------|---------------|-------|

|                |                                                                                                                                                                                                                                                                                                                                                                                                                                                                                                                                                                                                                                                                                                                               |      |
|----------------|-------------------------------------------------------------------------------------------------------------------------------------------------------------------------------------------------------------------------------------------------------------------------------------------------------------------------------------------------------------------------------------------------------------------------------------------------------------------------------------------------------------------------------------------------------------------------------------------------------------------------------------------------------------------------------------------------------------------------------|------|
| PubMed         | (Ascariasis[Title/Abstract] OR Ascaris[Title/Abstract] OR "A. lumbricoides"[Title/Abstract] OR Ascaris[MeSH] OR Trichuris[Title/Abstract] OR Trichuriasis[Title/Abstract] OR "Whip Worm"[Title/Abstract] OR "T. trichura"[Title/Abstract] OR Trichuris[MeSH] OR Hookworm[Title/Abstract] OR "A. duodenale"[Title/Abstract] OR "Ancylostoma duodenale"[Title/Abstract] OR ancylostomiasis[Title/Abstract] OR "N. americanus"[Title/Abstract] OR "Necator americanus"[Title/Abstract] OR necatoriasis[Title/Abstract] OR Ancylostoma [MeSH] OR Necator[MeSH]) AND (prevalence[Title/Abstract] OR incidence[Title/Abstract] OR epidemiology[Title/Abstract] OR surveillance[Title/Abstract]) NOT(Animals[MeSH] NOT Humans[MeSH]) | 2376 |
| Web of Science | (Ascariasis OR Ascaris OR A. lumbricoides OR Trichuris OR Trichuriasis OR Whip Worm OR T. trichura OR Hookworm OR A. duodenale OR Ancylostoma duodenale OR ancylostomiasis OR N. americanus OR Necator americanus OR necatoriasis) AND TOPIC:(prevalence OR incidence OR epidemiology OR surveillance) NOTTOPIC: ((Animals NOT Humans)) Timespan: 1980-2016. Indexes: SCI-EXPANDED, SSCI, A&HCI, ESCI.                                                                                                                                                                                                                                                                                                                        | 2266 |
| SCOPUS         | TITLE-ABS_KEY (ascariasis OR ascaris OR a. lumbricoides OR trichuris OR trichuriasis OR whip worm OR t. trichura OR hookworm OR a. duodenale OR ancylostoma duodenale OR ancylostomiasis OR n. americanus OR necator americanus OR necatoriasis) AND PUBYEAR>1979                                                                                                                                                                                                                                                                                                                                                                                                                                                             | 29   |

These papers were used to classify location-years for all locations and years present in the literature. Additionally, systematic literature reviews, meta-analyses, national health statistics publications and collaborator input were used to classify location-years not present in the literature review wherever possible.

### Modelling strategy

A Negative Binomial model was used to estimate deaths from ascariasis with random intercepts for locations and random slopes for age groups by location. A multivariate normal distribution using the mean and variance-covariance matrix from the model was used to generate 1,000 draws of deaths due to ascariasis. The final model was selected based on how well the estimated number fit the input data and how plausible the predicted distribution of disease was over time and with age.

# Ebola

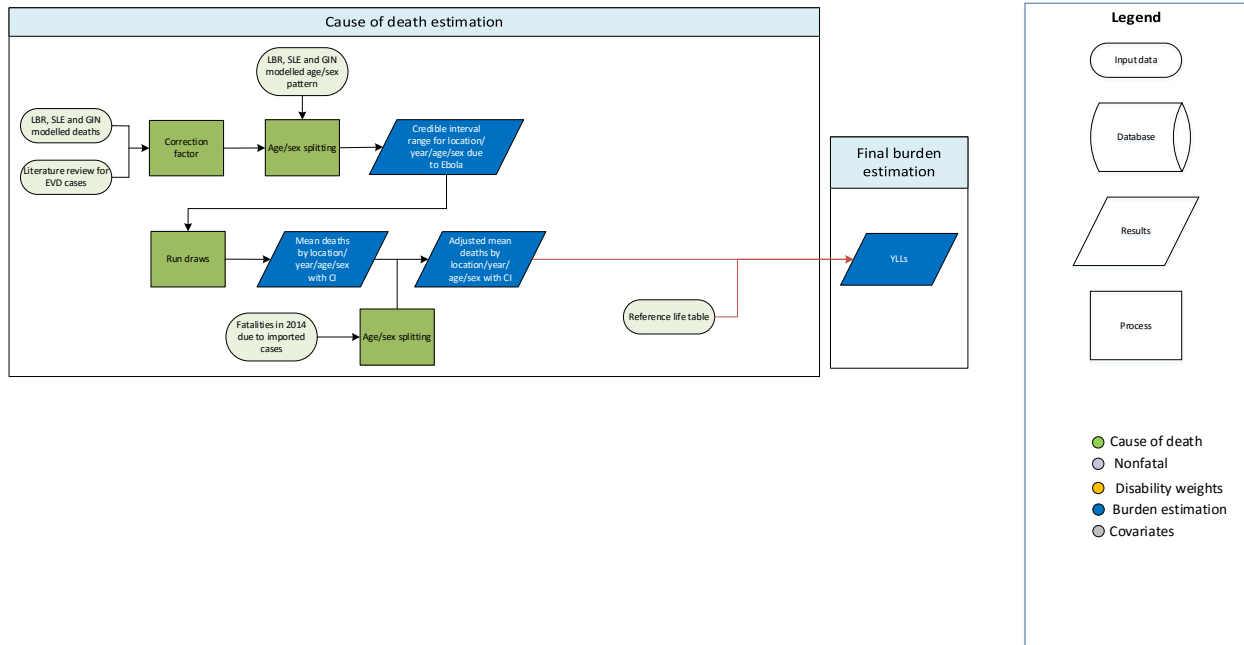

## Input data

The input data for deaths due to Ebola virus disease (EVD) came in two forms: (i) modelled estimates for the West African outbreak from 2013 to 2016 provided by the World Health Organization (WHO) focused specifically on the three worst-affected countries (Liberia, Guinea, and Sierra Leone) and (ii) literature searches for reported deaths due to EVD not captured by the West African dataset. This is further explained below:

- i. WHO estimates for Liberia, Guinea, and Sierra Leone, 2014–2016
  1. Researchers from Imperial College London (UK), as part of the WHO Ebola response team, provided modelled estimates for the number of fatalities that result from a given number of reported cases (provided by line lists from the WHO). This method was used in a variety of papers to generate baseline estimates of case fatality rates and other key epidemiological measures while correcting for the lag period between initially reporting a case and the final outcome of that case (whether it be death or survival). The full data cleaning and methodology are reported elsewhere.<sup>1,2</sup> Bespoke estimates were provided for GBD for Liberia, Sierra Leone, and Guinea and were stratified by age, sex, and year. Death data from Guinea ranged from February 18, 2014, until September 27, 2015, with data from Liberia ranging from March 20, 2014, to May 4, 2015, and data from Sierra Leone ranging from May 21 until September 28, 2015.

2. Reported clusters of cases in 2016 were identified by consulting WHO situation reports from the year 2016.
- ii. Literature searches for reported deaths due to EVD outside of Liberia, Guinea, and Sierra Leone
    1. In order to capture the small number of fatalities that occurred in countries outside of the core three mentioned above, WHO Situation Reports were consulted. Fatalities were reported in the US (specifically Texas), Mali, and Nigeria.<sup>3</sup> All deaths occurred in 2014. Additional age and sex information could only be obtained for the death that occurred in the US.

Using a previous review of historical outbreaks,<sup>4,5</sup> original articles describing the progression of historical outbreaks were consulted. This initial review was also updated to include the 2014 outbreak that occurred in the Democratic Republic of the Congo in 2014.<sup>6</sup> This resulted in datasets describing each outbreak with variable degrees of detail – some fully describing the age and sex breakdown of all deaths [eg, Rosello and colleagues<sup>7</sup>] and others simply providing the final total. Only confirmed or probable deaths were included; suspected EVD deaths were omitted. Outbreaks that spanned multiple years, in the absence of sufficient data providing an accurate breakdown, were apportioned between the years by evenly assigning a uniform number of deaths to each month of the outbreak’s duration.

### Modelling strategy

Data on deaths resulting from imported cases from 2014 were used as specific count data as it was assumed to be an accurate representation of the cases and outbreaks in these countries, all of which were on high alert for importation of cases.<sup>8,9</sup>

The other input data were processed prior to inclusion in GBD to account for any potential underreporting of deaths. A meta-analysis of existing underreporting studies from the literature was performed, using a random effects model with a DerSimonian-Laird estimator. A variety of sources were included, capturing a number of different estimation processes, all identified by literature review. The figure below shows the different effect sizes of the different studies,<sup>10–15</sup> as well as the resulting GBD 2016 correction factor, with the GBD 2015 correction factor for reference. The correction factor ranged from 1.4580 to 2.5475, with a mean of 2.0027.

### Underreporting of Ebola death data

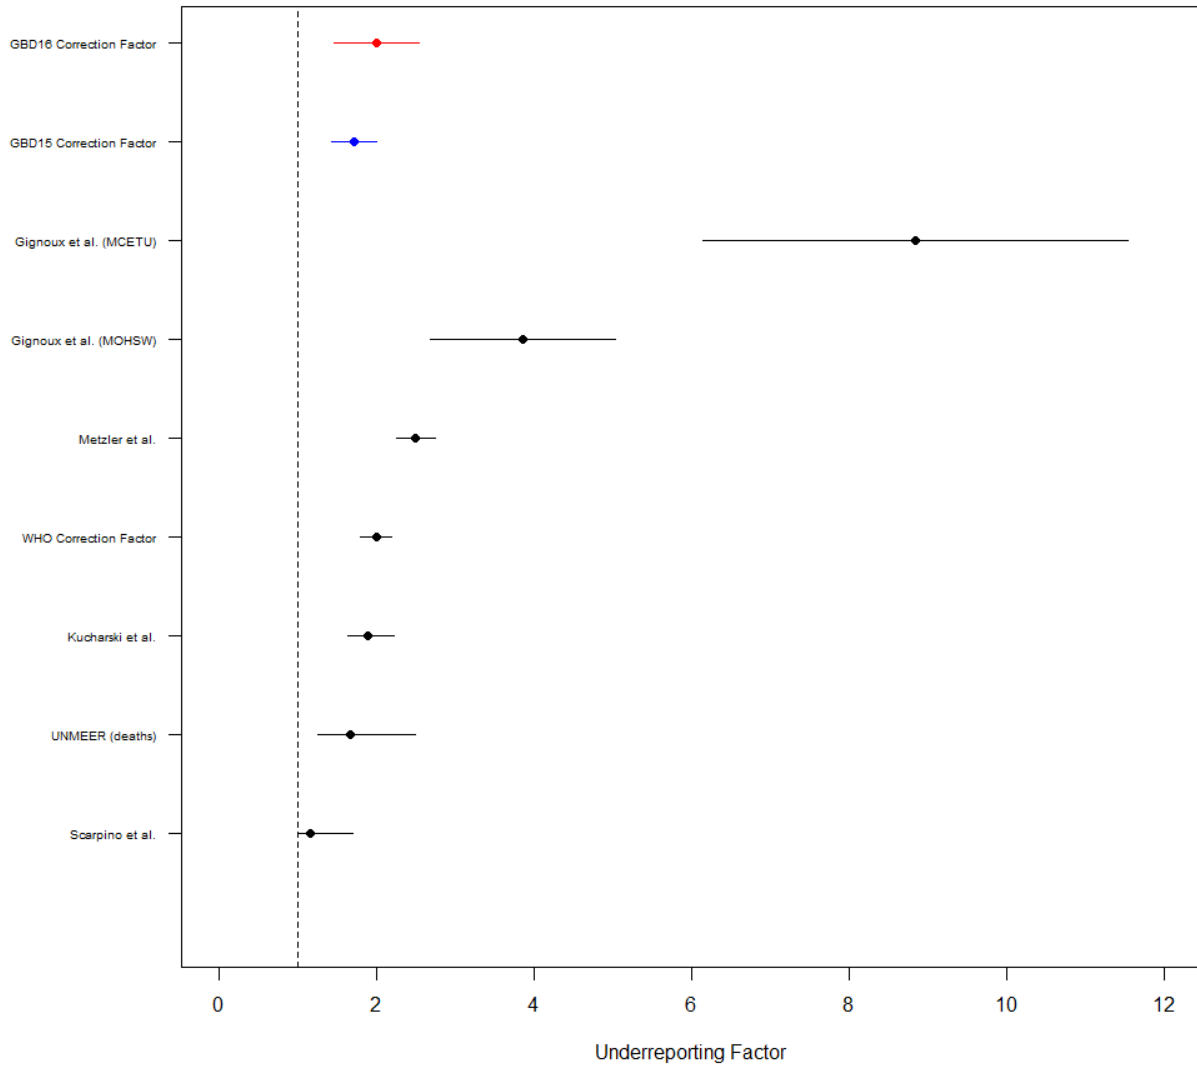

In order to capture this potential variation, all input data were multiplied by the lower and upper limit of this estimated correction factor; these numbers then provided the lower and upper bounds from which draw values were taken. For outbreaks where no data were supplied for age and/or sex, the pattern observed in the West African outbreak (for which there were the most comprehensive data) was used to apportion these total values.

One thousand draws were taken from a normal distribution fitted between these lower and upper bound values, which generated mean estimates stratified by age, sex, location, and year along with credible intervals for these numbers. These estimates were then adjusted by including the count data for imported cases from 2014.

Data on Ebola outbreaks prior to 2014 are sparse, and as a result many values derived from the West African outbreak were assumed to be valid for historical outbreaks as well. This may mask significant differences that exist between these outbreaks, some of which were caused by different species of

*Ebolavirus*. In order to minimize this problem we chose to implement a data-driven approach – for those outbreaks where sufficiently detailed historical data could be obtained, these were used in preference to any assumed age/sex breakdown.

## References

- 1 Agua-Agum J, Ariyaratnam A, Aylward B, *et al.* West African Ebola Epidemic after One Year — Slowing but Not Yet under Control. *N Engl J Med* 2015; **372**: 584–7.
- 2 Ebola Virus Disease in West Africa - The First 9 Months of the Epidemic and Forward Projections. *N Engl J Med* 2014; **371**: 1481–95.
- 3 World Health Organization. Ebola Situation Reports. 2016. Interview (accessed March 14, 2016).
- 4 Pigott DM, Golding N, Mylne A, *et al.* Mapping the zoonotic niche of Ebola virus disease in Africa. *Elife* 2014; **3**: e04395.
- 5 Mylne A, Brady OJ, Huang Z, *et al.* A comprehensive database of the geographic spread of past human Ebola outbreaks. *Sci Data* 2014; **1**: 140042.
- 6 Maganga GD, Kapetshi J, Berthet N, *et al.* Ebola virus disease in the Democratic Republic of Congo. *N Engl J Med* 2014; **371**: 2083–91.
- 7 Rosello A, Mossoko M, Flasche S, *et al.* Ebola virus disease in the Democratic Republic of the Congo, 1976-2014. *Elife* 2015; **4**. DOI:10.7554/eLife.09015.
- 8 Fasina FO, Shittu A, Lazarus D, *et al.* Transmission dynamics and control of Ebola virus disease outbreak in Nigeria, July to September 2014. *Euro Surveill* 2014; **19**: 20920.
- 9 Althaus CL, Low N, Musa EO, Shuaib F, Gsteiger S. Ebola virus disease outbreak in Nigeria: Transmission dynamics and rapid control. *Epidemics* 2015; **11**: 80–4.
- 10 Gignoux E, Idowu R, Bawo L, *et al.* Use of Capture-Recapture to Estimate Underreporting of Ebola Virus Disease, Montserrado County, Liberia. *Emerg Infect Dis* 2015; **21**: 2265–7.
- 11 Meltzer MI, Atkins CY, Santibanez S, *et al.* Estimating the future number of cases in the Ebola epidemic--Liberia and Sierra Leone, 2014-2015. *MMWR Suppl* 2014; **63**: 1–14.
- 12 Scarpino S V, Iamarino A, Wells C, *et al.* Epidemiological and viral genomic sequence analysis of the 2014 ebola outbreak reveals clustered transmission. *Clin Infect Dis* 2015; **60**: 1079–82.
- 13 Kucharski AJ, Camacho A, Flasche S, Glover RE, Edmunds WJ, Funk S. Measuring the impact of Ebola control measures in Sierra Leone. *Proc Natl Acad Sci U S A* 2015; **112**: 14366–71.
- 14 UNMEER. Sierra Leone: Ebola emergency Weekly Situation Report No. 7. 2014 [https://www.humanitarianresponse.info/system/files/documents/files/UNMEER\\_NERC\\_SitRep\\_07Dec.pdf](https://www.humanitarianresponse.info/system/files/documents/files/UNMEER_NERC_SitRep_07Dec.pdf).
- 15 Enserink M. How many Ebola cases are there really? | Science | AAAS. 2014. <http://www.sciencemag.org/news/2014/10/how-many-ebola-cases-are-there-really> (accessed Jan 28, 2017).



# Zika

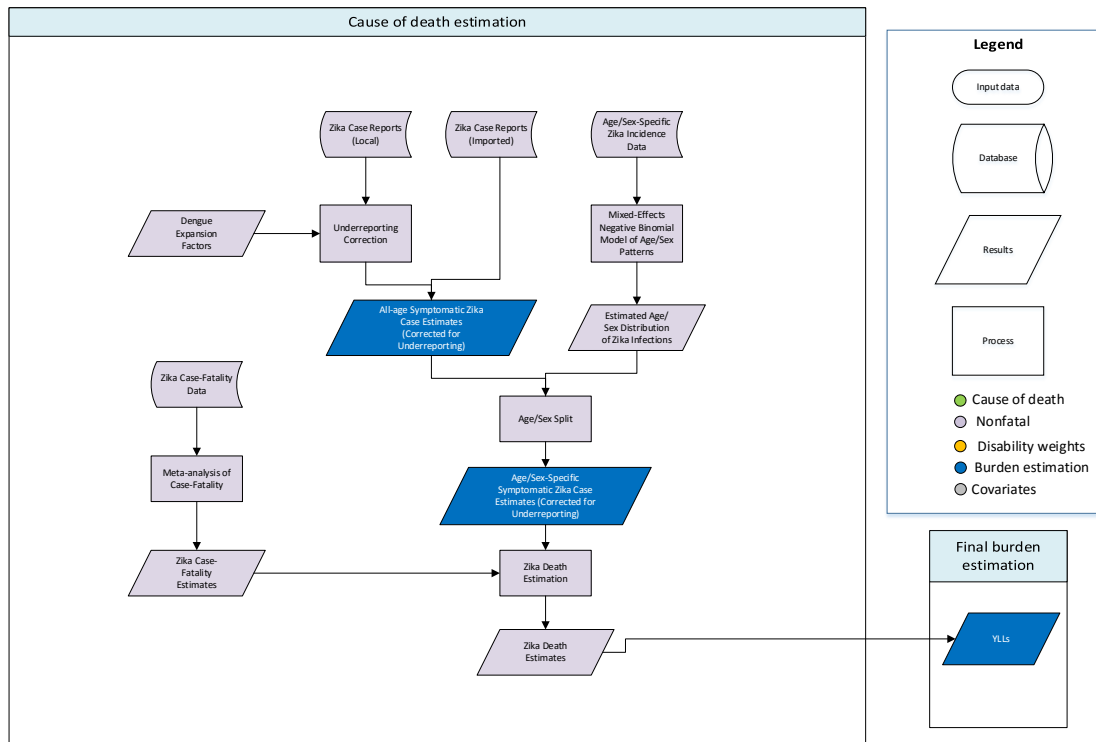

## Input data

Case data and death data come from official reports, primarily from PAHO.

## Modeling strategy

We model Zika deaths using a natural history approach in which we estimate deaths as the product of cases and case fatality. We estimate the number of true symptomatic cases as the product of reported cases and country-specific expansion factors that adjust for underreporting. Those expansion factors are derived from our dengue model and the methods used for their estimation are detailed in the dengue model documentation and by Stanaway et al<sup>1</sup>.

We then use an intercept only, mixed-effects Poisson regression model, with random effects on location, to estimate case fatality. Here, our outcome variable is reported Zika deaths and our exposure variable is estimated number of symptomatic Zika cases. For location-years with reported Zika deaths, we estimate deaths from the fixed effects (i.e. intercept and offset) and random effects, including uncertainty from both effects. For location-years with no Zika death reports, but with reported Zika cases, we estimate deaths from the fixed effects and sample from the distribution of all random effects.

## Reference

1 Stanaway JD, Shepard DS, Undurraga EA, Halasa YA, Coffeng LE, Brady OJ, et al. The global burden of dengue: an analysis from the Global Burden of Disease Study 2013. *The Lancet Infectious Diseases* [Internet]. 2016 Feb

## Other neglected tropical diseases (NTDs)

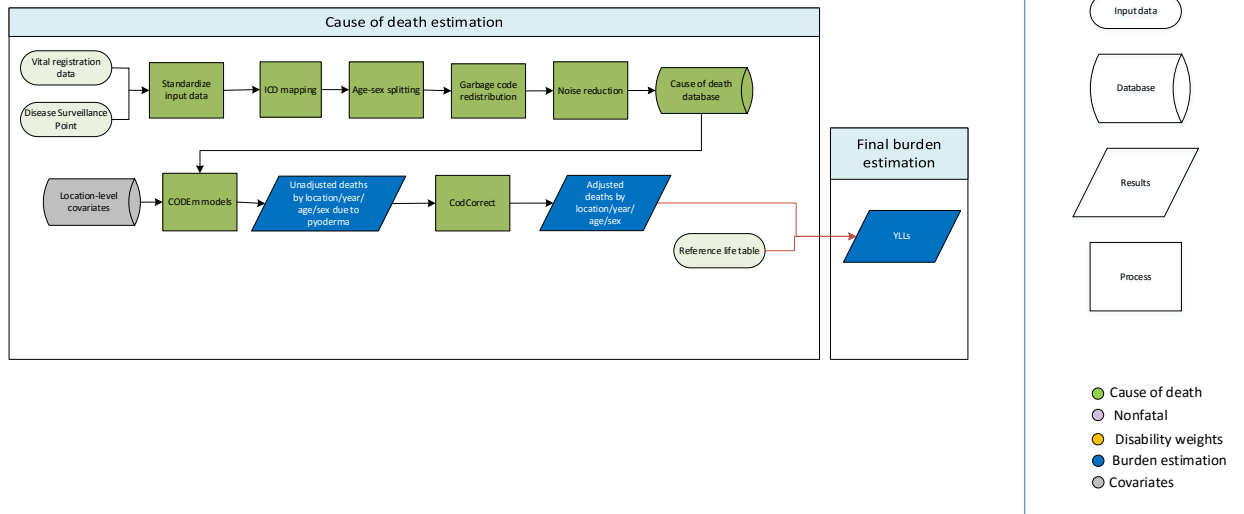

### Input data

We modelled other neglected tropical disease mortality using all available data in the cause of death database. Data points were outliered if they reported an improbable number of deaths or if their inclusion in the model yielded distorted trends.

### Modelling strategy

We modelled other neglected tropical disease mortality using a two-model hybrid approach: 1) a global CODEm model of all locations, using all data in the CoD database; and 2) a CODEm model restricted to data-rich countries.

We have made no substantive changes in the modelling strategy for other neglected tropical disease from GBD 2015.

## Maternal disorders

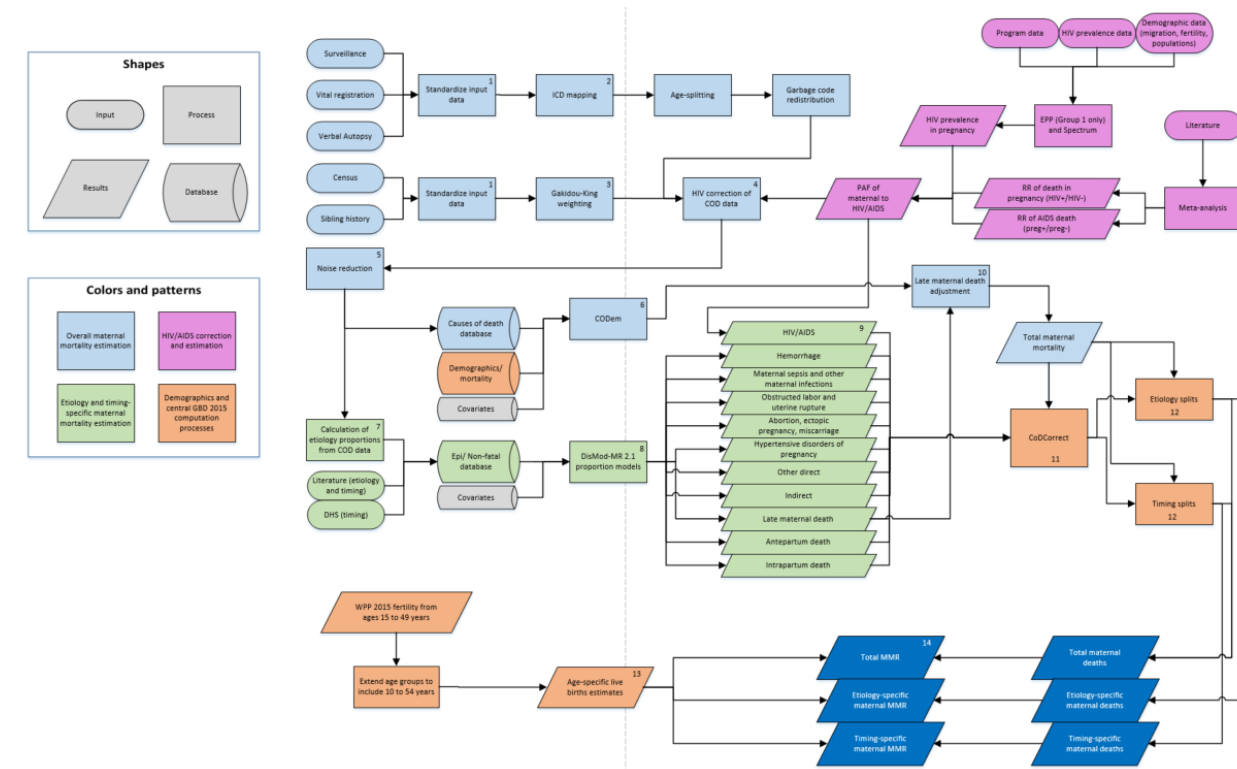

### Input data

CODEm models were informed by centrally prepped data stored in the cause of death (COD) database using standardized processes to adjust for bias due to incompleteness, misclassification, and zero counts. Our GBD 2016 case definition for maternal mortality continues to be all pregnancy-related deaths excluding accidental or incidental causes up to 1 year after the end of the pregnancy.

An updated literature review to inform the relative risk of mortality in pregnancy in HIV-positive versus HIV-negative women produced 23 leads and one usable source. We completed this search on August 30, 2016, using the following search string:

```
( HIV[Title/Abstract] OR "Acquired Immunodeficiency Syndrome"[Title/Abstract] OR AIDS[Title/Abstract] ) AND (
"pregnant"[Title/Abstract] OR "pregnancy"[Title/Abstract] OR "postpartum"[Title/Abstract] OR "post partum"[Title/Abstract] )
AND ( "mortality"[Title/Abstract] OR "death"[Title/Abstract] ) NOT "case report" AND "humans"[MeSH Terms] AND (
2011/07/06[PDat] : 2016/12/31[PDat] )
```

Correction for incidental HIV deaths was completed during the data preparation phase. Spectrum outputs of HIV prevalence in pregnancy were combined with relative risk of mortality during pregnancy (HIV+ versus HIV-negative) to calculate PAFs. A proportion of these deaths are incidental and a proportion are maternal as determined from two studies that looked at the relative risk of death in HIV positive women who are pregnant versus non-pregnant. All data was corrected using the PAFs. Incidental deaths were removed from sibling history and census data, while maternal HIV deaths were

added to VR data. The maternal proportion of the PAF was retained to be combined with estimates of the aetiologic-proportion from other causes as described below.

DisMod-MR 2.1 aetiology proportion models were informed by two sources of data. First, we completed a systematic literature review on August 30, 2016, using the search string below:

```
( ( ( "maternal mortality"[Title/Abstract] OR "maternal death"[Title/Abstract] OR "MM"[Title/Abstract] OR "confidential enquiry"[Title/Abstract] OR ( ( obstetric[Title/Abstract] OR pregnancy[Title/Abstract] ) AND (etiology[Title/Abstract] OR cause[Title/Abstract] or pattern[Title/Abstract] ) AND ( death[Title/Abstract] OR mortality[Title/Abstract] ) ) ) AND "humans"[MeSH Terms] NOT ( fetal[Title/Abstract] OR newborns[Title/Abstract] OR newborn[Title/Abstract] OR neonatal[Title/Abstract] OR "case report"[Title/Abstract] OR "case study"[Title/Abstract] OR pathogenesis[Title/Abstract] OR thromboprophylaxis[Title/Abstract] ) ) OR ( ("maternal mortality"[Title/Abstract] OR "maternal death*" [Title/Abstract] OR "MMR"[Title/Abstract]) AND ("Afghanistan"[Title/Abstract] OR "Albania"[Title/Abstract] OR "Algeria"[Title/Abstract] OR "Andorra"[Title/Abstract] OR "Angola"[Title/Abstract] OR "Antigua and Barbuda"[Title/Abstract] OR "Argentina"[Title/Abstract] OR "Armenia"[Title/Abstract] OR "Azerbaijan"[Title/Abstract] OR "Bahrain"[Title/Abstract] OR "Bangladesh"[Title/Abstract] OR "Barbados"[Title/Abstract] OR "Belarus"[Title/Abstract] OR "Belize"[Title/Abstract] OR "Benin"[Title/Abstract] OR "Bhutan"[Title/Abstract] OR "Bolivia"[Title/Abstract] OR "Bosnia and Herzegovina"[Title/Abstract] OR "Botswana"[Title/Abstract] OR "Brazil"[Title/Abstract] OR "Brunei"[Title/Abstract] OR "Bulgaria"[Title/Abstract] OR "Burkina Faso"[Title/Abstract] OR "Burundi"[Title/Abstract] OR "Cambodia"[Title/Abstract] OR "Cameroon"[Title/Abstract] OR "Cape Verde"[Title/Abstract] OR "Central African Republic"[Title/Abstract] OR "Chad"[Title/Abstract] OR "China"[Title/Abstract] OR "Colombia"[Title/Abstract] OR "Comoros"[Title/Abstract] OR "Congo"[Title/Abstract] OR "Costa Rica"[Title/Abstract] OR "Croatia"[Title/Abstract] OR "Cuba"[Title/Abstract] OR "Cyprus"[Title/Abstract] OR "Côte d'Ivoire"[Title/Abstract] OR "Democratic Republic of the Congo"[Title/Abstract] OR "Djibouti"[Title/Abstract] OR "Dominica"[Title/Abstract] OR "Dominican Republic"[Title/Abstract] OR "Ecuador"[Title/Abstract] OR "Egypt"[Title/Abstract] OR "El Salvador"[Title/Abstract] OR "Equatorial Guinea"[Title/Abstract] OR "Eritrea"[Title/Abstract] OR "Ethiopia"[Title/Abstract] OR "Federated States of Micronesia"[Title/Abstract] OR "Fiji"[Title/Abstract] OR "Gabon"[Title/Abstract] OR "Georgia"[Title/Abstract] OR "Ghana"[Title/Abstract] OR "Grenada"[Title/Abstract] OR "Guatemala"[Title/Abstract] OR "Guinea"[Title/Abstract] OR "Guinea-Bissau"[Title/Abstract] OR "Guyana"[Title/Abstract] OR "Haiti"[Title/Abstract] OR "Honduras"[Title/Abstract] OR "India"[Title/Abstract] OR "Indonesia"[Title/Abstract] OR "Iran"[Title/Abstract] OR "Iraq"[Title/Abstract] OR "Jamaica"[Title/Abstract] OR "Jordan"[Title/Abstract] OR "Kazakhstan"[Title/Abstract] OR "Kenya"[Title/Abstract] OR "Kiribati"[Title/Abstract] OR "Kuwait"[Title/Abstract] OR "Kyrgyzstan"[Title/Abstract] OR "Laos"[Title/Abstract] OR "Latvia"[Title/Abstract] OR "Lebanon"[Title/Abstract] OR "Lesotho"[Title/Abstract] OR "Liberia"[Title/Abstract] OR "Libya"[Title/Abstract] OR "Lithuania"[Title/Abstract] OR "Macedonia"[Title/Abstract] OR "Madagascar"[Title/Abstract] OR "Malawi"[Title/Abstract] OR "Malaysia"[Title/Abstract] OR "Maldives"[Title/Abstract] OR "Mali"[Title/Abstract] OR "Malta"[Title/Abstract] OR "Marshall Islands"[Title/Abstract] OR "Mauritania"[Title/Abstract] OR "Mauritius"[Title/Abstract] OR "Moldova"[Title/Abstract] OR "Mongolia"[Title/Abstract] OR "Montenegro"[Title/Abstract] OR "Morocco"[Title/Abstract] OR "Mozambique"[Title/Abstract] OR "Myanmar"[Title/Abstract] OR "Namibia"[Title/Abstract] OR "Nepal"[Title/Abstract] OR "Nicaragua"[Title/Abstract] OR "Niger"[Title/Abstract] OR "Nigeria"[Title/Abstract] OR "North Korea"[Title/Abstract] OR "Oman"[Title/Abstract] OR "Pakistan"[Title/Abstract] OR "Palestine"[Title/Abstract] OR "Panama"[Title/Abstract] OR "Papua New Guinea"[Title/Abstract] OR "Paraguay"[Title/Abstract] OR "Peru"[Title/Abstract] OR "Philippines"[Title/Abstract] OR "Qatar"[Title/Abstract] OR "Romania"[Title/Abstract] OR "Russia"[Title/Abstract] OR "Rwanda"[Title/Abstract] OR "Saint Lucia"[Title/Abstract] OR "Saint Vincent and the Grenadines"[Title/Abstract] OR "Samoa"[Title/Abstract] OR "Saudi Arabia"[Title/Abstract] OR "Senegal"[Title/Abstract] OR "Serbia"[Title/Abstract] OR "Seychelles"[Title/Abstract] OR "Sierra Leone"[Title/Abstract] OR "Singapore"[Title/Abstract] OR "Solomon Islands"[Title/Abstract] OR "Somalia"[Title/Abstract] OR "South Africa"[Title/Abstract] OR "South Sudan"[Title/Abstract] OR "Sri Lanka"[Title/Abstract] OR "Sudan"[Title/Abstract] OR "Suriname"[Title/Abstract] OR "Swaziland"[Title/Abstract] OR "Syria"[Title/Abstract] OR "São Tomé and Príncipe"[Title/Abstract] OR "Taiwan"[Title/Abstract] OR "Tajikistan"[Title/Abstract] OR "Tanzania"[Title/Abstract] OR "Thailand"[Title/Abstract] OR "The Bahamas"[Title/Abstract] OR "The Gambia"[Title/Abstract] OR "Timor-Leste"[Title/Abstract] OR "Togo"[Title/Abstract] OR "Tonga"[Title/Abstract] OR "Trinidad and Tobago"[Title/Abstract] OR "Tunisia"[Title/Abstract] OR "Turkmenistan"[Title/Abstract] OR "Uganda"[Title/Abstract] OR "Ukraine"[Title/Abstract] OR "United Arab Emirates"[Title/Abstract] OR "Uruguay"[Title/Abstract] OR "Uzbekistan"[Title/Abstract] OR "Vanuatu"[Title/Abstract] OR "Venezuela"[Title/Abstract] OR "Vietnam"[Title/Abstract] OR "Yemen"[Title/Abstract] OR "Zambia"[Title/Abstract] OR "Zimbabwe"[Title/Abstract] ) AND "humans"[MeSH] NOT ( "demographic and health survey*" [Title/Abstract] OR DHS[Title/Abstract] OR "reproductive health survey*" [Title/Abstract] OR
```

RHS[Title/Abstract] ) ) ) AND ( 2015/04/30[PDat] : 2016/12/31[PDat] ) ) OR ( ( HIV[Title/Abstract] OR "Acquired Immunodeficiency Syndrome"[Title/Abstract] OR AIDS[Title/Abstract] ) AND ( "pregnant"[Title/Abstract] OR "pregnancy"[Title/Abstract] OR "postpartum"[Title/Abstract] OR "post partum"[Title/Abstract] ) AND ( "mortality"[Title/Abstract] OR "death"[Title/Abstract] ) NOT "case report" AND "humans"[MeSH Terms] AND ( 2011/07/06[PDat] : 2016/12/31[PDat] ) ) )

A total of 698 sources were reviewed for their title and abstract. Of those selected for full text review, 17 had usable data for aetiology-specific maternal mortality models. All data were prepped as “proportion” of total maternal deaths due to that cause. The second source of data was from the COD database. All aetiology-specific COD data were processed to be “proportion” data by calculating the cause-specific deaths divided by the total maternal deaths for the matching data source, year, age, and location. Owing to the large volume of total COD data and small sample sizes in many locations, COD data were collapsed around each of the five-year periods for which DisMod-MR 2.1 makes distinct estimates (1990, 1995, 2000, 2005, 2010, and 2016). Late maternal death data were only included for the subset of locations where they were reliably coded in raw VR. All data were uploaded to the nonfatal database.

### Modelling strategy

Overall maternal mortality was estimated with CODEm. All data from all geographies were reviewed. Outliers were identified as those data where age patterns or temporal patterns were inconsistent with neighbouring age groups or locations or where sparse data were predicting implausible overall temporal or age patterns for a given location.

DisMod-MR 2.1 proportion models for each sub-cause of maternal mortality were all single-parameter meta-regression models. Because many sources do not include the entire cause list, a series of study covariates were used to facilitate crosswalking back to the reference definition. The reference definition **includes** “other” direct obstetric complications, indirect maternal deaths, and late maternal death. Country covariates were specific for each model and included abortion legality (for abortion, ectopic pregnancy, and miscarriage), log-transformed lag-distributed income (for sepsis and late maternal death), and logit-transformed in-facility delivery proportion (for haemorrhage, hypertensive disorders of pregnancy, and obstructed labour). The time window was set at +/- 2 years for all models except late maternal death, which was +/- 5 years. The narrower window ensured that any given year of VR data only informed a single estimate.

We corrected the time trend in the CODEm model by identifying the year in which each location began consistently using O95 and O96 codes for late maternal death. These were identified as the earliest year in which the threshold proportion of total maternal deaths coded to late exceeded the lowest reported in the literature (0.5%). After a location was identified as having started using late maternal death codes, we assumed that practice continued. We adjusted upward results for all years prior to the advent of late maternal death coding using the outputs of the late maternal death proportion DisMod model.

Etiology-specific estimates were derived by multiplying the proportion outputs from DisMod-MR 2.1 by the total maternal deaths for that age-group, location, and year. HIV-related maternal deaths were estimated for all locations using the PAF approach described above for mortality data processing.

## ICD10 and ICD9 codes used for maternal disorders

| Model                                    | ICD10 code                                                                                                                                                                | ICD9 code                                                        |
|------------------------------------------|---------------------------------------------------------------------------------------------------------------------------------------------------------------------------|------------------------------------------------------------------|
| Abortion, ectopic pregnancy, miscarriage | O00-O08, O36.4                                                                                                                                                            | 631, 633-639                                                     |
| Maternal hemorrhage                      | O20, O43.2, O44-O46, O62.2, O67, O72                                                                                                                                      | 640-641, 661.0, 666                                              |
| Hypertensive disorders of pregnancy      | O11-O16                                                                                                                                                                   | 642.3, 642.4, 642.5, 642.6, 642.7, 642.9                         |
| Obstructed labor and uterine rupture     | O64-O66, O71, O83                                                                                                                                                         | 659-660, 662, 665, 669.5, 669.6                                  |
| Maternal sepsis and other infections     | O23, O41, O75.2-3, O85, O86, O91                                                                                                                                          | 646.5, 646.6, 659.2, 659.3, 670, 672.0, 674.1, 674.2, 674.3, 675 |
| Other maternal disorders                 | O09-O09.93, O21-O22-O22.93, O26-26.93, O28-O28.9, O29-O29.93, O30-O35.9, O40-O43.93, O47-48.1, O60-O61.9, O63-O63.9, O68-O70.9, O73-O77.9, O80-O84, O87-O90.9, O92-O92.79 | 646-646.44, 646.7-646.93, 648.1-649.9                            |
| Indirect maternal disorders              | O24-O25.3, O98-O99.91                                                                                                                                                     | 647-649.64                                                       |

## Dismod Proportion Models Covariates and Coefficients

### *Abortion, ectopic pregnancy and miscarriage*

| Study-level covariate             | Parameter  | Geography level | beta                  | Exponentiated beta |
|-----------------------------------|------------|-----------------|-----------------------|--------------------|
| Only Maternal Direct Causes       | Proportion | Global          | 0.20 (0.19 — 0.20)    | 1.22 (1.21 — 1.22) |
| Hospital Inpatient                | Proportion | Global          | 0.30 (0.30 — 0.30)    | 1.35 (1.35 — 1.35) |
| Late maternal deaths not included | Proportion | Global          | - 0.20 (0.20 — 0.20)  | 1.22 (1.22 — 1.22) |
| Country-Level Covariate           |            |                 |                       |                    |
| Legality of Abortion              | Proportion | Global          | 0.054 (0.054 — 0.055) | 1.06 (1.06 — 1.06) |

*Maternal hemorrhage*

| Study-level covariate             | Parameter  | Geography level | beta                  | Exponentiated beta |
|-----------------------------------|------------|-----------------|-----------------------|--------------------|
| Only Maternal Direct Causes       | Proportion | Global          | 0.20 (0.18 — 0.20)    | 1.22 (1.20 — 1.22) |
| Hospital Inpatient                | Proportion | Global          | 0.30 (0.29 — 0.30)    | 1.35 (1.34 — 1.35) |
| Late maternal deaths not included | Proportion | Global          | 0.20 (0.20 — 0.20)    | 1.22 (1.22 — 1.22) |
| Country-level covariate           |            |                 |                       |                    |
| In-Facility Delivery (proportion) | Proportion | Global          | 0.100 (0.100 — 0.100) | 1.11 (1.10 — 1.11) |

*Hypertensive disorders of pregnancy*

| Study-level covariate             | Parameter  | Geography level | beta                  | Exponentiated beta |
|-----------------------------------|------------|-----------------|-----------------------|--------------------|
| Only Maternal Direct Causes       | Proportion | Global          | 0.20 (0.19 — 0.20)    | 1.22 (1.21 — 1.22) |
| Hospital Inpatient                | Proportion | Global          | 0.30 (0.30 — 0.30)    | 1.35 (1.34 — 1.35) |
| Late maternal deaths not included | Proportion | Global          | 0.20 (0.20 — 0.20)    | 1.22 (1.22 — 1.22) |
| Country-level covariate           |            |                 |                       |                    |
| In-Facility Delivery (proportion) | Proportion | Global          | 0.100 (0.100 — 0.100) | 1.11 (1.11 — 1.11) |

*Obstructed labor and uterine rupture*

| Study-level covariate             | Parameter  | Geography level | beta                  | Exponentiated beta |
|-----------------------------------|------------|-----------------|-----------------------|--------------------|
| Only Maternal Direct Causes       | Proportion | Global          | 0.20 (0.20 — 0.20)    | 1.22 (1.22 — 1.22) |
| Hospital Inpatient                | Proportion | Global          | 0.30 (0.30 — 0.30)    | 1.35 (1.35 — 1.35) |
| Late maternal deaths not included | Proportion | Global          | 0.20 (0.20 — 0.20)    | 1.22 (1.22 — 1.22) |
| Country-level covariate           |            |                 |                       |                    |
| In-Facility Delivery (proportion) | Proportion | Global          | 0.100 (0.100 — 0.100) | 1.11 (1.11 — 1.11) |



Maternal sepsis and other infections

| Study-level covariate             | Parameter  | Geography level | beta                  | Exponentiated beta |
|-----------------------------------|------------|-----------------|-----------------------|--------------------|
| Only Maternal Direct Causes       | Proportion | Global          | 0.20 (0.20 — 0.20)    | 1.22 (1.22 — 1.22) |
| Hospital Inpatient                | Proportion | Global          | 0.30 (0.30 — 0.30)    | 1.35 (1.35 — 1.35) |
| Late maternal deaths not included | Proportion | Global          | 0.20 (0.20 — 0.20)    | 1.22 (1.22 — 1.22) |
| Country-level covariates          |            |                 |                       |                    |
| LDI (\$ per capita)               | Proportion | Global          | 0.100 (0.100 — 0.100) | 1.11 (1.10 — 1.11) |

Other Maternal Disorders

| Study-level covariate             | Parameter  | Geography level | beta                  | Exponentiated beta |
|-----------------------------------|------------|-----------------|-----------------------|--------------------|
| Only Maternal Direct Causes       | Proportion | Global          | 0.20 (0.19 — 0.20)    | 1.22 (1.21 — 1.22) |
| Hospital Inpatient                | Proportion | Global          | 0.20 (0.19 — 0.20)    | 1.22 (1.21 — 1.22) |
| Late maternal deaths not included | Proportion | Global          | 0.20 (0.20 — 0.20)    | 1.22 (1.22 — 1.22) |
| Country-level covariate           |            |                 |                       |                    |
| LDI (\$ per capita)               | Proportion | Global          | 0.100 (0.100 — 0.100) | 1.11 (1.10 — 1.11) |

Indirect Maternal Disorders

| Study-level covariate             | Parameter  | Geography level | beta                  | Exponentiated beta |
|-----------------------------------|------------|-----------------|-----------------------|--------------------|
| Hospital Inpatient                | Proportion | Global          | 0.20 (0.20 — 0.30)    | 1.22 (1.22 — 1.22) |
| Late maternal deaths not included | Proportion | Global          | 0.20 (0.20 — 0.20)    | 1.22 (1.22 — 1.22) |
| Country-level covariate           |            |                 |                       |                    |
| LDI (\$ per capita)               | Proportion | Global          | 0.100 (0.100 — 0.100) | 1.11 (1.11 — 1.11) |

## Neonatal disorders

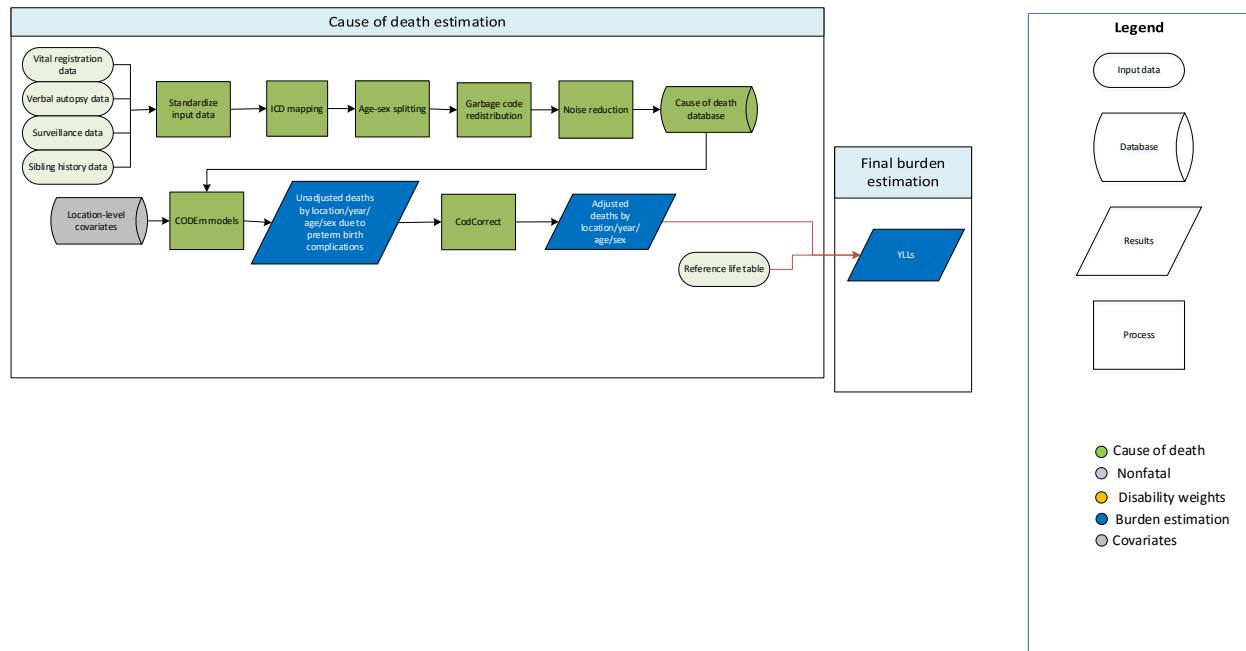

### Input data

For the neonatal disorders envelope, preterm birth complications, and neonatal encephalopathy, vital registration, verbal autopsy, surveillance, and sibling history data were used for GBD 2016 to estimate number of deaths from each condition. For sepsis and other neonatal infections, vital registration, surveillance, and sibling history data were used. And for neonatal hemolytic disease and other neonatal conditions, vital registration and surveillance data were used. For all neonatal causes of death, vital registration was by far the most common data type. We only modelled deaths among males and females under age 5. Data points were selected as outliers if they were implausibly high, low, or significantly conflicted with established age or temporal patterns. Addition of significant new data from the Sample Registration System (SRS) in India had a significant effect on the estimates of mortality due to neonatal conditions at the global level.

### Modelling strategy

For GBD 2016, an ensemble modelling approach was used via CODEm to model each of the different neonatal conditions. The same was done for GBD 2013 and 2015.

Varying levels of data quality and coding issues may still have affected our results. Validation studies suggest that verbal autopsy methods tend to be less accurate for cause of death ascertainment in the neonatal age groups.<sup>1-4</sup> This implies that in regions such as sub-Saharan Africa or South Asia, where the data primarily come from verbal autopsy studies, the distribution of sub-causes within all neonatal conditions may be less accurate. Furthermore, validation studies suggest that verbal autopsy methods tend to be particularly poor at ascertaining deaths from neonatal sepsis. Thus, for GBD 2016, all verbal autopsy data were excluded for neonatal sepsis and neonatal hemolytic disease.

## Selected Covariates

| Covariate                                              | Transformation | Level | Direction |
|--------------------------------------------------------|----------------|-------|-----------|
| Education (years per capita)                           | None           | 3     | -1        |
| Health System Access                                   | None           | 2     | -1        |
| In-Facility Delivery                                   | None           | 2     | -1        |
| LDI (I\$ per capita)                                   | Log            | 3     | -1        |
| Underweight (proportion <2SD weight for age, <5 years) | None           | 2     | 1         |
| Live Births 35+                                        | None           | 2     | 1         |
| Indoor Air Pollution (All cooking fuels)               | None           | 1     | 1         |
| Smoking prevalence (Reproductive Age-Standardized)     | None           | 1     | 1         |
| Total Fertility Rate                                   | Log            | 3     | 1         |
| SDI                                                    | None           | 3     | -1        |
| HAQI                                                   | None           | 2     | -1        |
| Skilled Birth Attendance                               | None           | 2     | -1        |
| Antenatal Care (4 visit)                               | None           | 2     | -1        |

## References

- 1 Anker M, Black RE, Coldham C, *et al.* A Standard Verbal Autopsy Method for Investigating Causes of Death in Infants and Children. Geneva, Switzerland: World Health Organization Department of Communicable Disease Surveillance and Response; The Johns Hopkins School of Hygiene and Public Health; The London School of Hygiene and Tropical Medicine, 1999.
- 2 Kalter HD, Gray RH, Black RE, Gultiano SA. Validation of postmortem interviews to ascertain selected causes of death in children. *Int J Epidemiol* 1990; **19**: 380–6.
- 3 Quigley MA, Armstrong Schellenberg JR, Snow RW. Algorithms for verbal autopsies: a validation study in Kenyan children. *Bull World Health Organ* 1996; **74**: 147–54.
- 4 Snow RW, Armstrong JR, Forster D, *et al.* Childhood deaths in Africa: uses and limitations of verbal autopsies. *The Lancet* 1992; **340**: 351–5.

## Nutritional deficiencies: Protein-energy malnutrition, Iron-deficiency anaemia, Iodine deficiency, Vitamin A deficiency, and other nutritional deficiencies

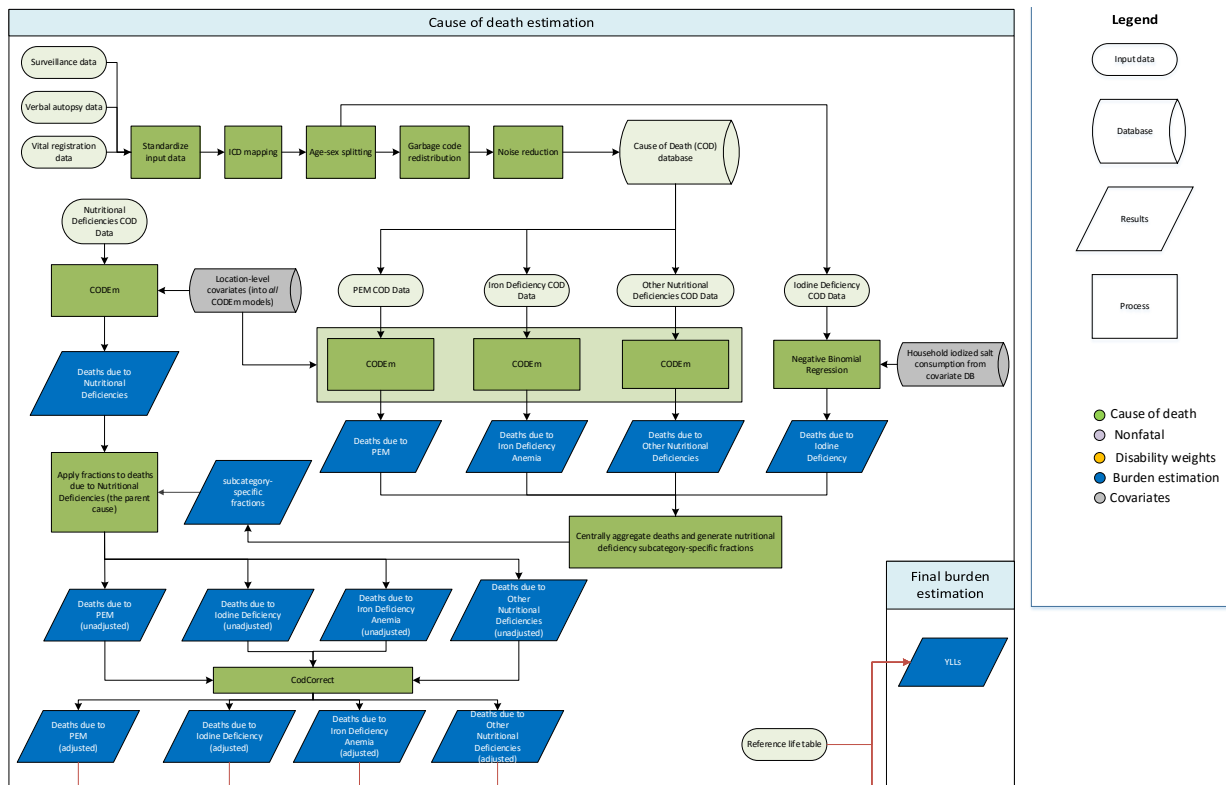

### Input data and case definitions

For GBD 2016, vital registration, verbal autopsy, and surveillance data were used to model deaths due to nutritional deficiencies. As described in other sections, the volume of new data was significant. Notable additions include Sample Registration System (SRS) from states of India and provinces of Indonesia. ICD codes, which can be interpreted as case definitions, for each of the nutritional deficiencies is listed in the table below.

| GBD cause                      | ICD-10 code                                                                                                                                                          |
|--------------------------------|----------------------------------------------------------------------------------------------------------------------------------------------------------------------|
| Protein-energy malnutrition    | E40-E46.9 (Kwashiorkor, marasmus, specified and unspecified protein calorie malnutrition)                                                                            |
| Iron-deficiency anemia         | D50.1-D50.8 (iron deficiency anemia)                                                                                                                                 |
| Iodine deficiency              | E00-E02 (congenital iodine-deficiency syndrome, iodine-deficiency related thyroid disorders and allied conditions, and subclinical iodine-deficiency hypothyroidism) |
| Other nutritional deficiencies | D51-D52.0 (vitamin B12 deficiency anemia and folate deficiency anemia)                                                                                               |
| Other nutritional deficiencies | D52.8-D53.9 (other nutritional anemias)                                                                                                                              |

|                                |                                                                                                                                                                                         |
|--------------------------------|-----------------------------------------------------------------------------------------------------------------------------------------------------------------------------------------|
| Other nutritional deficiencies | D64.3 (other sideroblastic anemias)                                                                                                                                                     |
| Other nutritional deficiencies | E51-E61.9 (thiamine, niacin, other B group vitamins, ascorbic acid, vitamin D, other vitamin, dietary calcium, dietary selenium, dietary zinc, and other nutrient element deficiencies) |
| Other nutritional deficiencies | E63-E64.0 (other nutritional deficiencies and sequelae of protein-calorie malnutrition)                                                                                                 |
| Other nutritional deficiencies | E64.2-E64.9 (sequelae of vitamin C deficiency, rickets, other nutritional deficiencies, and unspecified nutritional deficiencies)                                                       |
| Other nutritional deficiencies | M12.1-M12.19 (Kaschin-Beck disease)                                                                                                                                                     |
| Garbage code                   | D50, D50.0 and D50.9 (unspecified anemia)                                                                                                                                               |

## Modelling strategy

Other than data and covariate updates, we did not make any modeling strategy changes for GBD 2016.

We estimated mortality for each of the nutritional deficiencies in two steps. CODEm was first used to generate mortality estimates for total nutritional deficiencies. The sub-categories of nutritional deficiencies, namely protein-energy malnutrition, iodine deficiency, iron-deficiency anaemia, and other nutritional deficiencies, were modelled separately. We assumed zero mortality due to Vitamin A deficiency, instead analyzing it as a cause of nonfatal disease burden and a risk factor for mortality due to other causes. We outliered data that were largely conflicting with the majority of data from other studies conducted either in the same or different countries (with similar socio-demographic characteristics) in the same region.

CODEm was used to model all sub-categories except for iodine deficiency. The CODEm covariates (including level and direction) used for each of the models are listed in the table below. The covariate used in the iodine deficiency model is “proportion of households using iodized salt.”

| Nutritional deficiencies (overall) |                                                                                                    |           |
|------------------------------------|----------------------------------------------------------------------------------------------------|-----------|
| Level                              | Covariate                                                                                          | Direction |
| 1                                  | Age-standardized prevalence of severe anemia                                                       | +         |
|                                    | Malnutrition shock mortality rate                                                                  | +         |
|                                    | Proportion of children 0-5 with weight-for-age z-score < -2                                        | +         |
|                                    | Proportion of children 0-5 with weight-for-height z-score < -2                                     | +         |
|                                    | Proportion of households using iodized salt                                                        | -         |
|                                    | Total kcal per person per day availability                                                         | -         |
| 2                                  | Population living in the 1 <sup>st</sup> world quintile (least) of annual rainfall                 | +/-       |
|                                    | Population living in the 2 <sup>nd</sup> world quintile (2 <sup>nd</sup> least) of annual rainfall | +/-       |
|                                    | Sanitation (proportion with access)                                                                | -         |
|                                    | Mortality rate due to war shocks                                                                   | +         |
|                                    | Improved water source (proportion with access)                                                     | -         |
|                                    | Health Systems Access                                                                              | -         |
| 3                                  | Education (years per capita)                                                                       | -         |
|                                    | Lag distributed income per capita                                                                  | -         |
|                                    | Socio-demographic index                                                                            | -         |

|                                       |                                                                                                    |                  |
|---------------------------------------|----------------------------------------------------------------------------------------------------|------------------|
|                                       | Antenatal care (4 visits) coverage (proportion)                                                    | -                |
| <b>Protein-energy malnutrition</b>    |                                                                                                    |                  |
| <b>Level</b>                          | <b>Covariate</b>                                                                                   | <b>Direction</b> |
| 1                                     | Age-standardized prevalence of severe anemia                                                       | +                |
|                                       | Total kcal per person per day availability                                                         | -                |
|                                       | Malnutrition shock mortality rate                                                                  | +                |
|                                       | Proportion of children 0-5 with weight-for-height z-score < -2                                     | +                |
| 2                                     | Population living in the 1 <sup>st</sup> world quintile (least) of annual rainfall                 | +/-              |
|                                       | Population living in the 2 <sup>nd</sup> world quintile (2 <sup>nd</sup> least) of annual rainfall | +/-              |
|                                       | Sanitation (proportion with access)                                                                | -                |
|                                       | Mortality rate due to war shocks                                                                   | +                |
|                                       | Improved water source (proportion with access)                                                     | -                |
|                                       | Healthcare access and quality index                                                                | -                |
|                                       | Health Systems Access                                                                              | -                |
| 3                                     | Antenatal care (4 visits) coverage (proportion)                                                    | -                |
|                                       | Education (years per capita)                                                                       | -                |
|                                       | Lag distributed income per capita                                                                  | -                |
|                                       | Socio-demographic index                                                                            | -                |
| <b>Iron-deficiency anemia</b>         |                                                                                                    |                  |
| <b>Level</b>                          | <b>Covariate</b>                                                                                   | <b>Direction</b> |
| 1                                     | Proportion of children 0-5 with weight-for-age z-score < -2                                        | +                |
|                                       | Age-standardized prevalence of severe anemia                                                       | +                |
| 2                                     | Population living in the 1 <sup>st</sup> world quintile (least) of annual rainfall                 | +/-              |
|                                       | Population living in the 2 <sup>nd</sup> world quintile (2 <sup>nd</sup> least) of annual rainfall | +/-              |
|                                       | Sanitation (proportion with access)                                                                | -                |
|                                       | Total kcal per person per day availability                                                         | -                |
|                                       | Improved water source (proportion with access)                                                     | -                |
|                                       | Health Systems Access                                                                              | -                |
|                                       | Healthcare access and quality index                                                                | -                |
| 3                                     | Education (years per capita)                                                                       | -                |
|                                       | Lag distributed income per capita                                                                  | -                |
|                                       | Socio-demographic index                                                                            | -                |
| <b>Other nutritional deficiencies</b> |                                                                                                    |                  |
| <b>Level</b>                          | <b>Covariate</b>                                                                                   | <b>Direction</b> |
| 1                                     | Age-standardized prevalence of severe anemia                                                       | +                |
|                                       | Malnutrition shock mortality rate                                                                  | +                |
|                                       | Proportion of children 0-5 with weight-for-age z-score < -2                                        | +                |
| 2                                     | Population living in the 1 <sup>st</sup> world quintile (least) of annual rainfall                 | +/-              |
|                                       | Population living in the 2 <sup>nd</sup> world quintile (2 <sup>nd</sup> least) of annual rainfall | +/-              |
|                                       | Sanitation (proportion with access)                                                                | -                |
|                                       | Mortality rate due to war shocks                                                                   | +                |
|                                       | Improved water source (proportion with access)                                                     | -                |
|                                       | Total kcal per person per day availability                                                         | -                |
|                                       | Health Systems Access                                                                              | -                |
|                                       | Healthcare access and quality index                                                                | -                |
| 3                                     | Education (years per capita)                                                                       | -                |

|  |                                   |   |
|--|-----------------------------------|---|
|  | Lag distributed income per capita | – |
|  | Socio-demographic index           | – |

Iodine deficiency was modelled using a negative binomial regression model given the small number of deaths attributable to it. A negative binomial model is more appropriate than a Poisson count model as it accounts for greater variance (over-dispersion) in the data. By utilizing the exposure option in Stata, we model cause fractions with a negative binomial model. We tested both rate- and cause fraction-based models but selected a cause fraction model due to better model performance. We used vital registration data with proportion of household iodized salt consumption as a country-level covariate and dummy variables on age and sex to model mortality from iodine deficiency. Uncertainty was estimated by taking 1,000 iterations of the predictions based on the variance-covariance matrix and a random sample from a gamma distribution.

Estimates from the four nutritional sub-categories were then scaled at the 1,000 draw level in CODCorrect to match that for total nutritional deficiencies. Protein energy malnutrition and other nutritional deficiencies death estimates were also corrected for misclassification of Alzheimer and Parkinson disease deaths. Detailed information on this process can be found in section 4 of the appendix.

## Sexually transmitted infections excluding HIV

This write-up covers includes: Total sexually transmitted diseases (STI), Chlamydia, Gonorrhea, Syphilis, Trichomonas, Genital herpes due to HSV-2, and other STI.

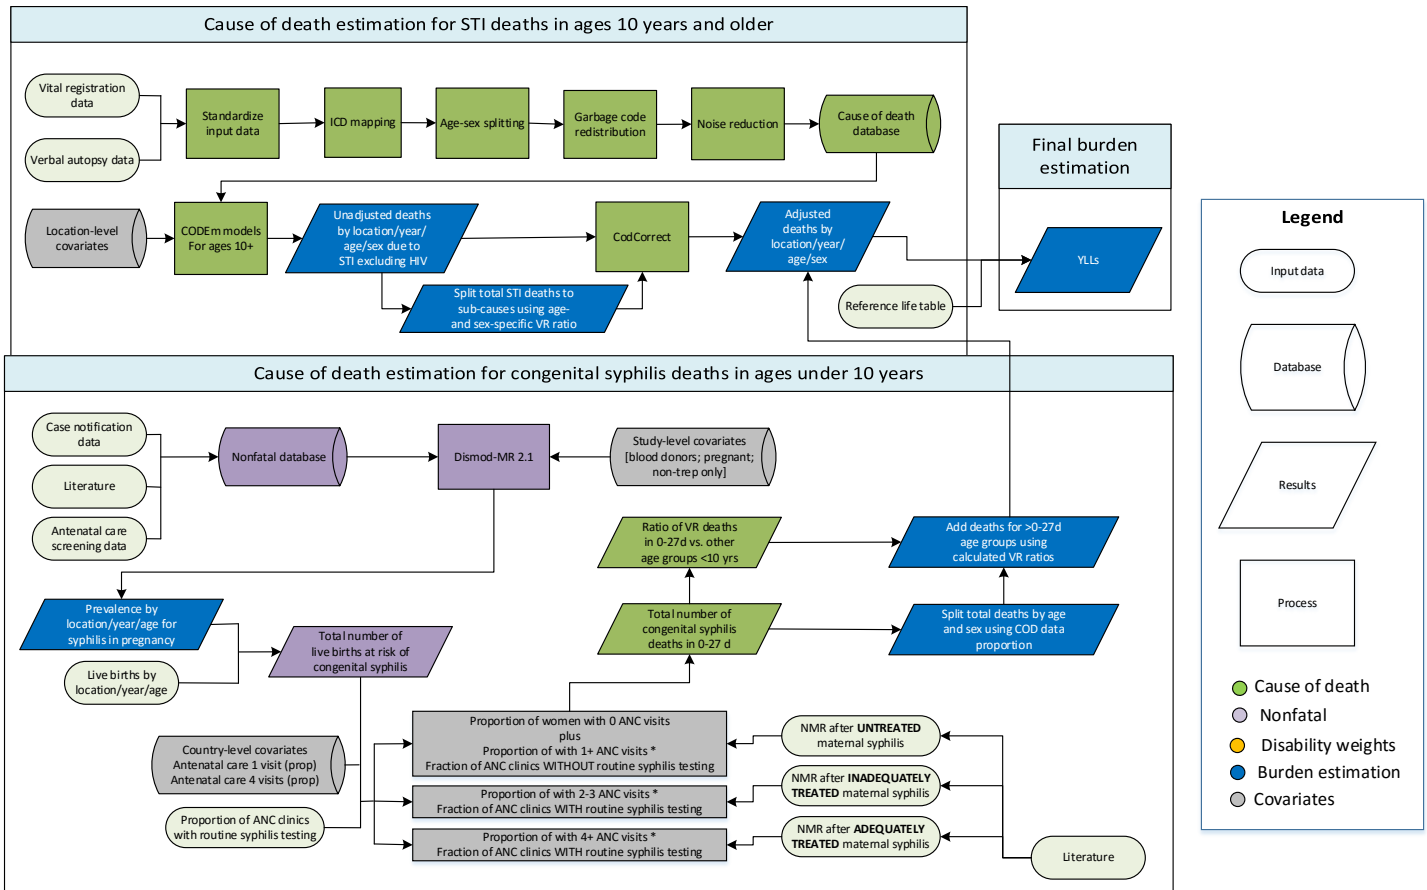

### Input data

For GBD 2016, STI cause of death models included syphilis, chlamydial infection, gonococcal infection, and other STIs. CODEm models for males and females 10 years and older were informed from centrally prepped data stored in the cause of death (COD) database. All data from all geographies were reviewed. Outliers were identified as those data where age patterns or temporal patterns were inconsistent with neighboring age groups or locations or where sparse data were predicting implausible overall temporal or age patterns for a given location.

Four different types of data were used for the natural history model (NHM) of congenital syphilis. First, we used literature, survey, and report data described below to estimate early syphilis in pregnancy. Second, we used GBD 2016 estimates of antenatal care (ANC) coverage data from our covariates database and live births estimates from our demographics analysis. Third, we used published data from the Global Health Observatory (updated in GBD 2015) on proportion of ANC clinics that test for syphilis and the proportion of women testing positive who receive treatment. Fourth, we used the results of a



systematic literature review completed for GBD 2010 to inform excess mortality of neonates born with syphilis.

### Modelling strategy

We completed data-rich (DR) and global CODEm models for ages 10 years and over for males and females separately. Nine covariates were used in each CODEm model, including 1) syphilis prevalence in pregnancy from DisMod-MR 2.1 analysis described below; 2) coverage of one antenatal care (ANC) visit, 3) coverage of four ANC visits; 4) age-specific fertility rate; 5) total fertility rate; 6) health system access, a principal components analysis of ANC, in-facility delivery, skilled birth attendance, and vaccine coverage; 7) national income per capita (LDI); 8) years of education per capita; and 9) abortion legality, an index that includes a categorical rating of abortion laws that range from 1 (always illegal) to 7 (always legal on demand) as well as a categorical variable on additional restrictions (eg, waiting period, family permission required) and gestational week at which abortion is allowed.

The overall CODEm model for STI was split into the sub-causes using vital registration (VR) data from the COD database. Trichomoniasis and HSV-2 are assumed not to cause mortality. Chlamydia is further assumed not to cause death in males. Cause-specific mortality rate VR data for each age group, sex, and year were summed and scaled to match the total STI cause-specific mortality rate predicted by CODEm. This VR pattern was applied globally to all locations.

Our NHM for congenital syphilis began with estimation of early syphilis prevalence in all age groups, both sexes, all GBD locations, and in each year from 1990 to 2016. We modelled early syphilis in DisMod-MR 2.2, restricting incidence before the age of 10 and after the age of 65 and assuming zero excess mortality from early syphilis. Study-level covariates identified data in non-reference categories (pregnant, blood donors) and using non-reference testing modalities (eg, treponemal test only, non-treponemal test only) and were crosswalked to the reference category within the DisMod-MR 2.1 cascade, predicting specific conversion values for each country. The latter specification of country-level crosswalks was chosen because the bias between non-reference populations and testing modalities was assumed to differ by geography and as a function of, for example, endemicity of acute infectious agents like malaria.

Age-specific prevalence results were paired with age-specific live birth results to generate total number of births at risk of congenital syphilis. To estimate the actual number of congenital syphilis births, we combined information on ANC coverage from GBD 2016 covariates analyses with ANC syphilis testing and treatment data from GHO. Adequate treatment was assumed to confer no risk of congenital syphilis mortality. Those with four ANC visits or 1–3 ANC visits with testing and treatment were assumed to have received adequate treatment. Inadequate treatment occurred in those women with 1–3 ANC visits without either testing or treatment or those women with one ANC visit but with testing and treatment. Those women with only one or no ANC visits and no syphilis testing or treatment were assumed to be untreated. Untreated and inadequate treatment proportions were combined with potential congenital syphilis births to estimate total neonatal syphilis births. Each categorical risk category was combined with corresponding neonatal excess mortality rates derived in GBD 2010. This total number of neonatal syphilis deaths was then split between 0–6 days and 7–27 days age groups using sex- and age-specific VR data from the COD database. Congenital syphilis deaths beyond the neonatal period were likewise estimated using sex- and age-specific VR data. This VR pattern was applied globally to all locations.

The primary limitation of our estimation of STI deaths in those over 10 years old is data availability, especially from countries where VR systems are not available. Even in countries with VR, there may be some variation in practices for coding deaths to STI as the underlying cause, especially given the potentially variable presentation of many of the conditions in this category. Such variation is more likely to lead to underestimation of STI deaths than overestimation. Sub-cause estimation is similarly limited by data availability in those locations without VR data, and our estimates are thus based on the overall pattern of deaths in generally higher-income geographies.

The primary implication of this limitation is that it decreases the resolution with which we can decompose the relationship between mortality from HIV and other STI. Our NHM for congenital syphilis continues to improve but still is limited by data availability issues, especially on the coverage and effectiveness of ANC interventions to prevent congenital syphilis. We do not have information on the proportion of women who tested positive who may have received treatment elsewhere, or information on the coverage of treatment for neonates, infants, and children born with congenital syphilis. Both limitations could potentially have led to lower estimates of congenital syphilis deaths. On the other hand, our DisMod-MR 2.2 analysis suggested that pregnant women may in fact have higher syphilis prevalence than the general population, which would have led to higher estimates. We have also not quantified the number of stillbirths associated with congenital syphilis.

No other significant changes were made for GBD 2016.

# Hepatitis

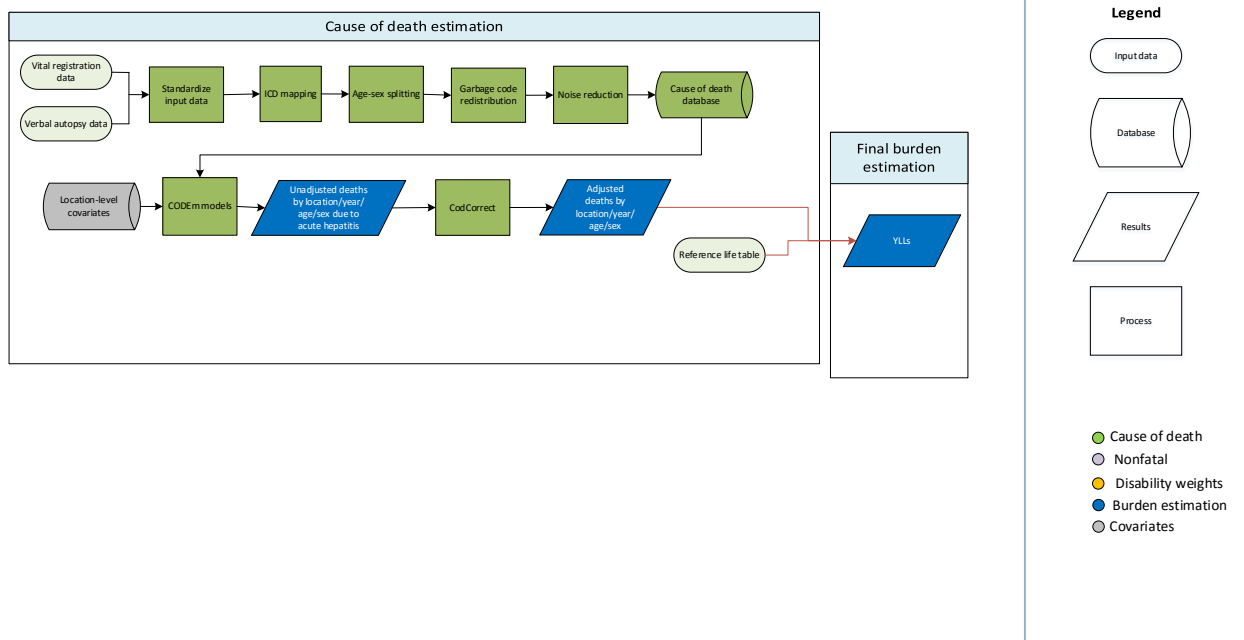

## Input data

We modelled hepatitis mortality using all available data in the cause of death database. Data points were outliered if they reported an improbable number of hepatitis deaths or if their inclusion in the model yielded distorted trends. In some cases multiple data sources for the same location differed dramatically both in their quality and reported hepatitis mortality (eg, a verbal autopsy and vital registration source). In these cases the lower-quality data source was outliered.

## Modelling strategy

We modelled hepatitis mortality using a two-model hybrid approach: 1) a global CODEm model of all locations, using all data in the CoD database; and 2) a CODEm model restricted to data-rich countries. Since GBD 2013 we have switched from a single global model to the hybrid global/data-rich model approach. We have otherwise made no substantive changes in the modelling strategy for hepatitis from GBD 2013.

## Acute hepatitis A

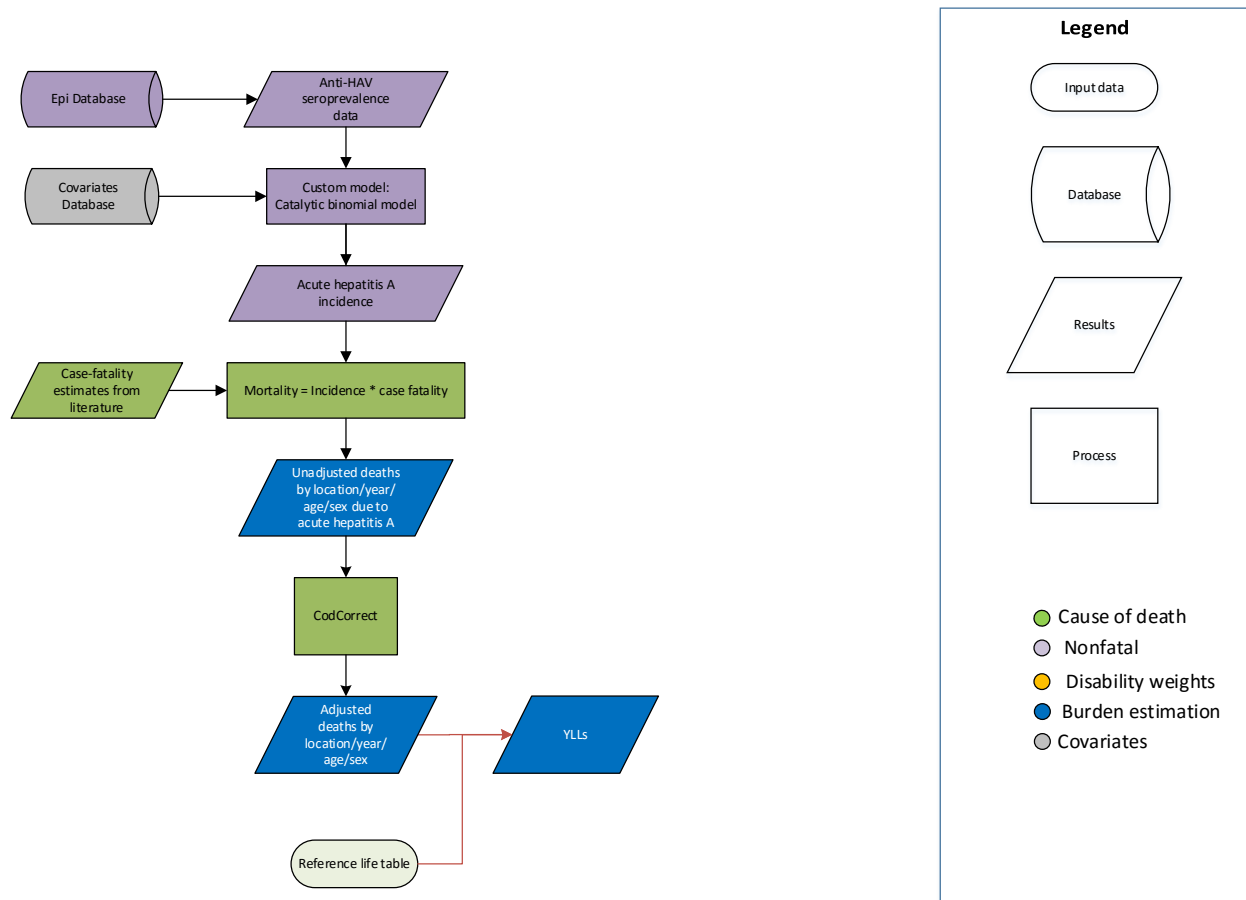

### Input data

We use anti-HAV seroprevalence data from population-based studies and surveys for the incidence model.

### Modelling strategy

Virus-specific CoD data for acute hepatitis are inconsistently reported and of questionable accuracy. We therefore use a two-part modelling strategy for acute hepatitis A, B, C, and E. First, we develop a parent acute hepatitis mortality model using CODEm and all acute hepatitis mortality data within the CoD database. Second, we develop four separate natural history models to estimate deaths from acute hepatitis A, B, C, and E, respectively. Finally, we rescale the virus-specific death estimates from the four natural history models to fit within the envelope defined by the parent acute hepatitis CoD model.

Given its reasonably stable force of infection among susceptible people across age groups, we used a catalytic binomial model to estimate incidence of acute hepatitis A based on anti-HAV seroprevalence. The catalytic binomial model is a binomial generalized linear model with a complementary log-log link, and an offset term for log-age. Since anti-HAV is a lifetime marker of past infection, and a given individual can only be infected once, seroprevalence at age  $t$  is equal to the cumulative incidence (CI) over  $t$  years. Assuming constant force of infection, we can estimate the incidence rate (IR) as

$$CI = 1 - e^{-IR \cdot t}$$

We can rearrange this equation to solve for the log-IR:

$$\ln(IR) = \frac{\ln(-\ln(1 - CI))}{\ln(t)}$$

Thus, by using the complimentary log-log link for CI (i.e.,  $\ln(-\ln(1-CI))$ ) with an offset for log-age, we are able to model the incidence rate of infection from seroprevalence data. To inform the model in the absence of data we use a predictive covariate derived from principal components analysis of lag-distributed income (LDI) and the proportion of the population with access to improved water. We use a mixed effects model with fixed effects on the aforementioned PCA-derived covariate, and nested hierarchical random effects on super-region, region, and time.

Our overall approach has not changed from that used in GBD 2013. However, whereas we previously used a fixed-effects only catalytic binominal model for GBD 2013, we have incorporated random effects into the model for GBD 2016, improving the spatial structure of the model and allowing the model to better follow data.

## Acute hepatitis B

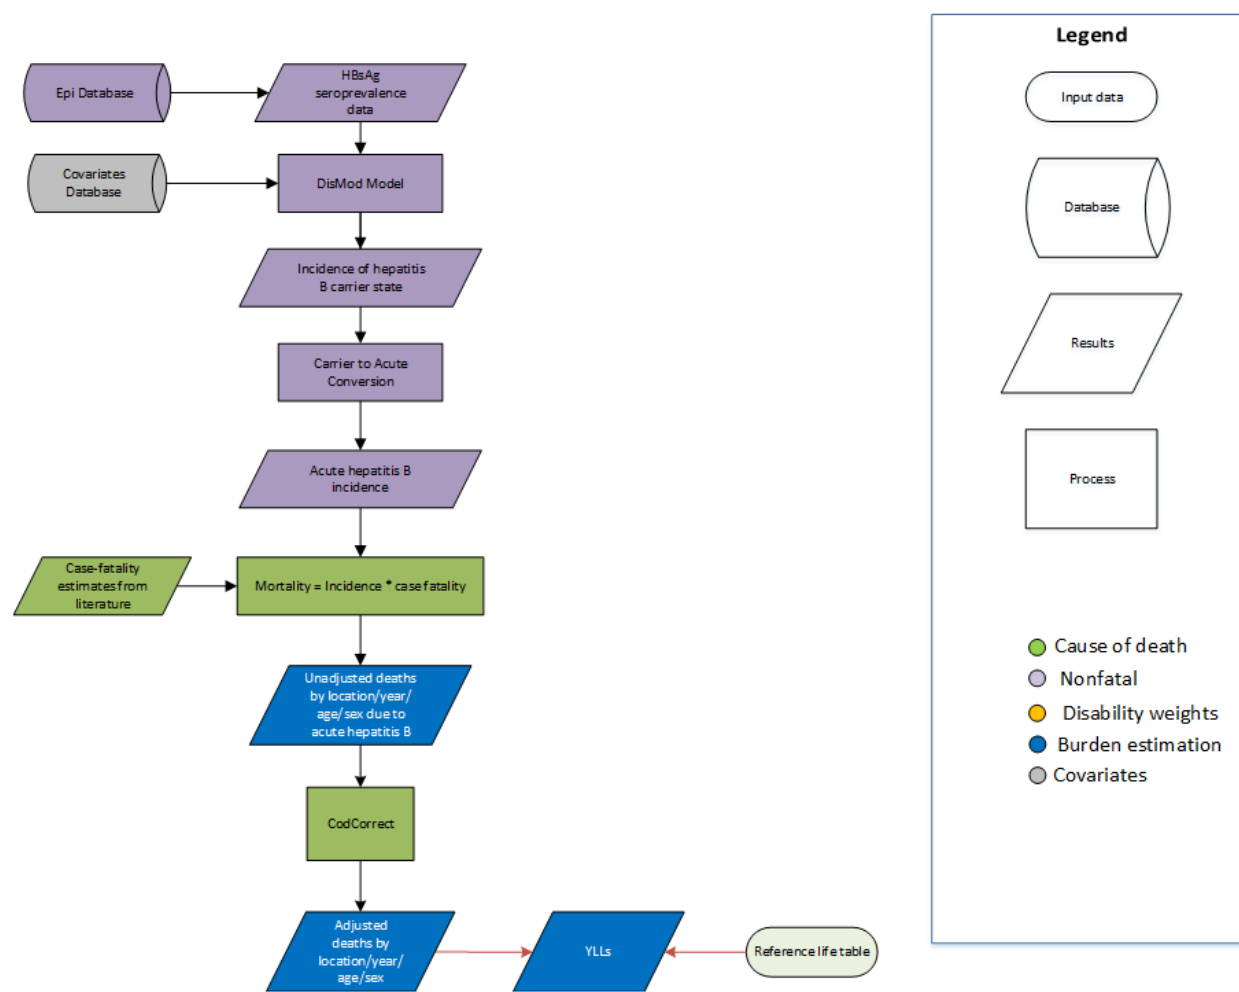

### Input data

We use hepatitis B surface antigen (HBsAg) seroprevalence data from population-based studies and surveys for the incidence model.

### Modelling strategy

Virus-specific CoD data for acute hepatitis are inconsistently reported and of questionable accuracy. We therefore use a two-part modelling strategy for acute hepatitis A, B, C, and E. First, we develop a parent acute hepatitis mortality model using CODEm and all acute hepatitis mortality data within the CoD database. Second, we develop four separate natural history models to estimate deaths from acute hepatitis A, B, C, and E, respectively. Finally, we rescale the virus-specific death estimates from the four natural history models to fit within the envelope defined by the parent acute hepatitis CoD model.

We model the incidence of chronic HBsAg carriage using a full DisMod model of HBsAg seroprevalence. We then convert incidence of chronic carriage to total incidence of hepatitis B infection by dividing age-specific estimates of the incidence of chronic carriage by age-specific estimates of the probability of infection resulting in carriage from Edmunds et al 1993 <sup>2</sup>. We then multiply incident infection estimates by estimates of probability of acute incidence, derived from cases in McMahon et al 1997 <sup>3</sup> and sampling from a beta distribution to propagate uncertainty. Lastly, using the estimates of acute hepatitis B infection, we multiply by the case fatality of acute hepatitis B using estimates derived from cases in Bianco et al 2003 <sup>4</sup> & Stoffolini et al 1997 <sup>5</sup>, sampling from a beta distribution to propagate uncertainty. The equations below describes the above text:

$$\begin{aligned} \text{Incident infection} &= \frac{\text{Chronic carriage}}{\beta_1} \\ \text{Incident acute infection} &= \text{Incidence infection} * \beta_2 \\ \text{Acute deaths} &= \text{Acute infection} * \beta_3 \end{aligned}$$

Where

$\beta_1$  = Probability of chronic infection  
 $\beta_2$  = Probability of acute infection  
 $\beta_3$  = Case fatality rate

## Acute hepatitis C

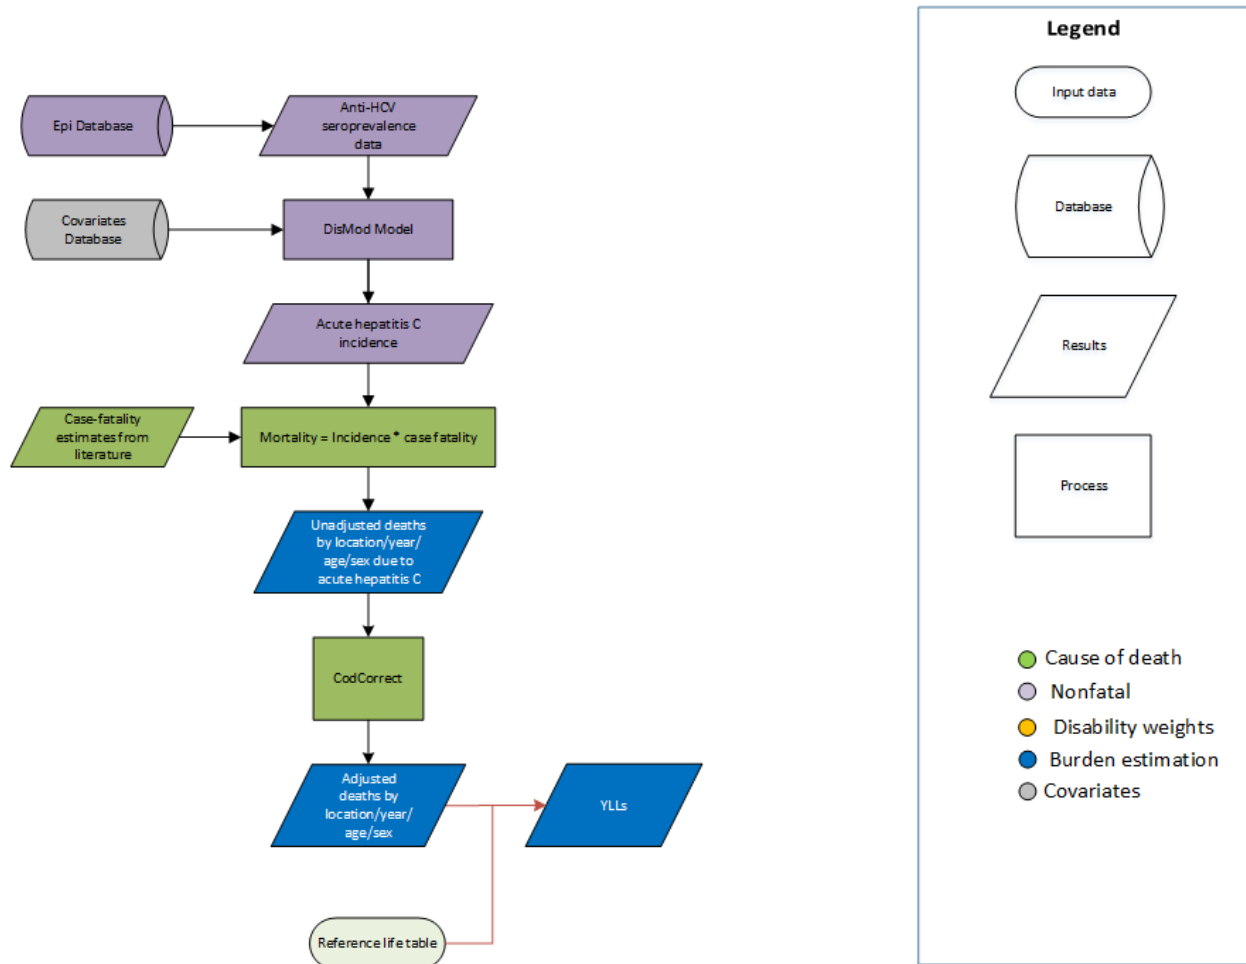

### Input data

We use anti-HCV seroprevalence data from population-based studies and surveys for the incidence model.

### Modelling strategy

Virus-specific CoD data for acute hepatitis are inconsistently reported and of questionable accuracy. We therefore use a two-part modelling strategy for acute hepatitis A, B, C, and E. First, we develop a parent acute hepatitis mortality model using CODEm and all acute hepatitis mortality data within the CoD database. Second, we develop four separate natural history models to estimate deaths from acute hepatitis A, B, C, and E, respectively. Finally, we rescale the virus-specific death estimates from the four natural history models to fit within the envelope defined by the parent acute hepatitis CoD model.



We model the incidence of hepatitis C using a full DisMod model of anti-HCV seroprevalence and estimate acute hepatitis C deaths as the product of these incidence estimates and published estimates of acute hepatitis C case fatality [Stroffolini et al 1997], sampling from a beta distribution to propagate uncertainty. The equation below describes the above discussion:

$$\textit{Acute deaths} = \textit{Acute incidence} * \beta$$

Where:

$\beta = \textit{Case fatality rate}$

## Acute hepatitis E

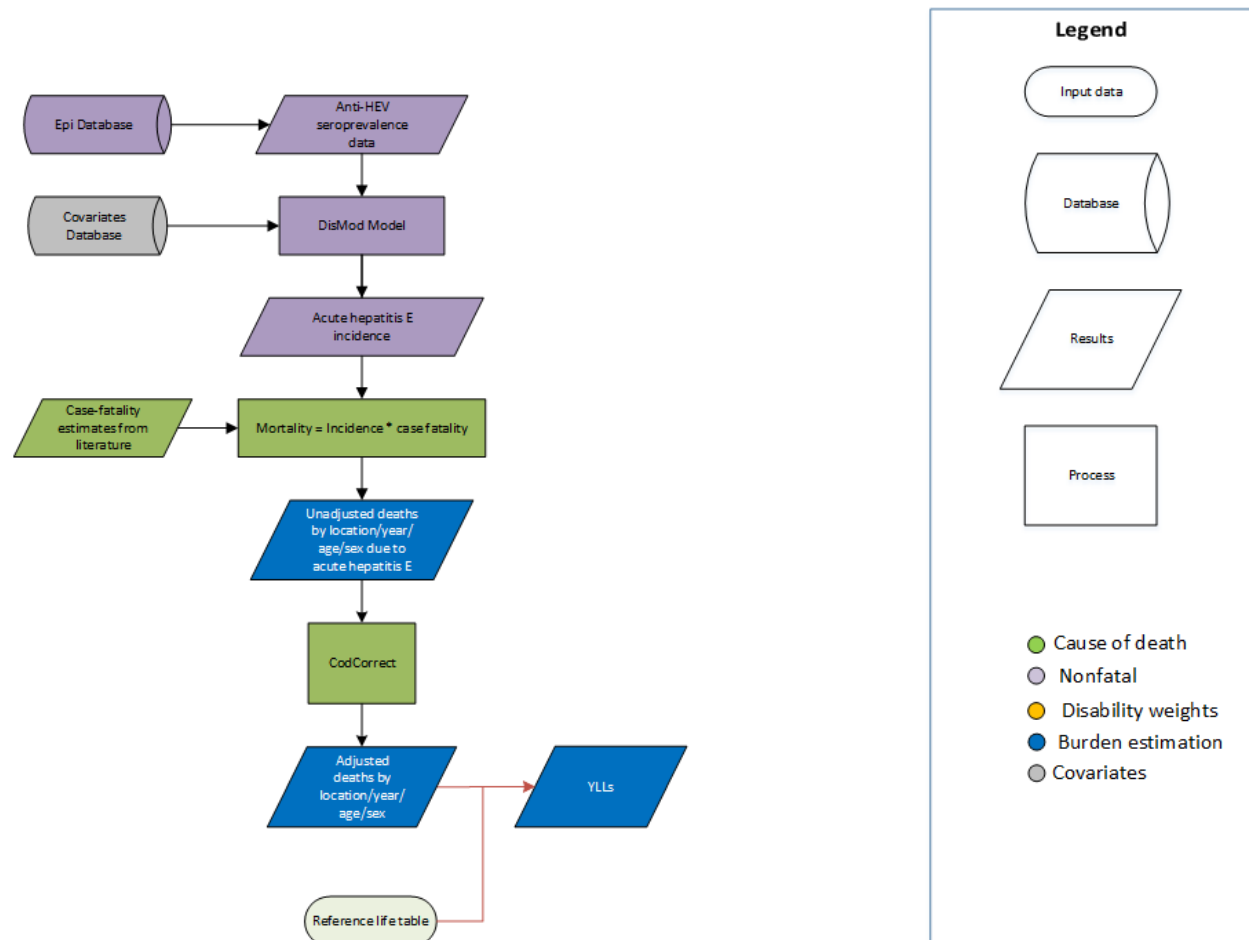

### Input data

We use anti-HEV seroprevalence data from population-based studies and surveys for the incidence model.

### Modelling strategy

Virus-specific CoD data for acute hepatitis are inconsistently reported and of questionable accuracy. We therefore use a two-part modelling strategy for acute hepatitis A, B, C, and E. First, we develop a parent acute hepatitis mortality model using CODEm and all acute hepatitis mortality data within the CoD database. Second, we develop four separate natural history models to estimate deaths from acute hepatitis A, B, C, and E, respectively. Finally, we rescale the virus-specific death estimates from the four natural history models to fit within the envelope defined by the parent acute hepatitis CoD model.

We model the incidence of hepatitis E using a full DisMod model of anti-HEV seroprevalence and estimate acute hepatitis E deaths as the product of these incidence estimates and published estimates of acute hepatitis E case fatality, accounting for the proportion of infections that occur in pregnant women and the higher case fatality of hepatitis E among pregnant women. Since HEV genotypes tend to

be less pathogenic and less virulent, we restrict hepatitis E deaths to countries in regions where genotypes 1 and 2 predominate (ie, Central Asia, Central sub-Saharan Africa, East Asia, Eastern sub-Saharan Africa, North Africa and Middle East, Oceania, South Asia, Southeast Asia, Southern sub-Saharan Africa, and Western sub-Saharan Africa).<sup>1</sup>

We have made no substantive changes in the modelling strategy from GBD 2013.

## Reference

1 Rein DB, Stevens GA, Theaker J, Wittenborn JS, Wiersma ST. The global burden of hepatitis E virus genotypes 1 and 2 in 2005. *Hepatology* 2012; 55: 988–97.

2 Edmunds, W. J., et al. "The influence of age on the development of the hepatitis B carrier state." *Proceedings of the Royal Society of London B: Biological Sciences* 253.1337 (1993): 197-201.

3 McMahon, Brian J. "Epidemiology and natural history of hepatitis B." *Seminars in liver disease*. Vol. 25. No. S 1. Published in 2005 by Thieme Medical Publishers, Inc., 333 Seventh Avenue, New York, NY 10001, USA., 2005.

4 Bianco, E., et al. "Case fatality rate of acute viral hepatitis in Italy: 1995–2000. An update." *Digestive and liver disease* 35.6 (2003): 404-408.

5 Guadagnino, Vincenzo, et al. "Prevalence, risk factors, and genotype distribution of hepatitis C virus infection in the general population: a community-based survey in southern Italy." *Hepatology* 26.4 (1997): 1006-1011.

## Other Infectious Diseases

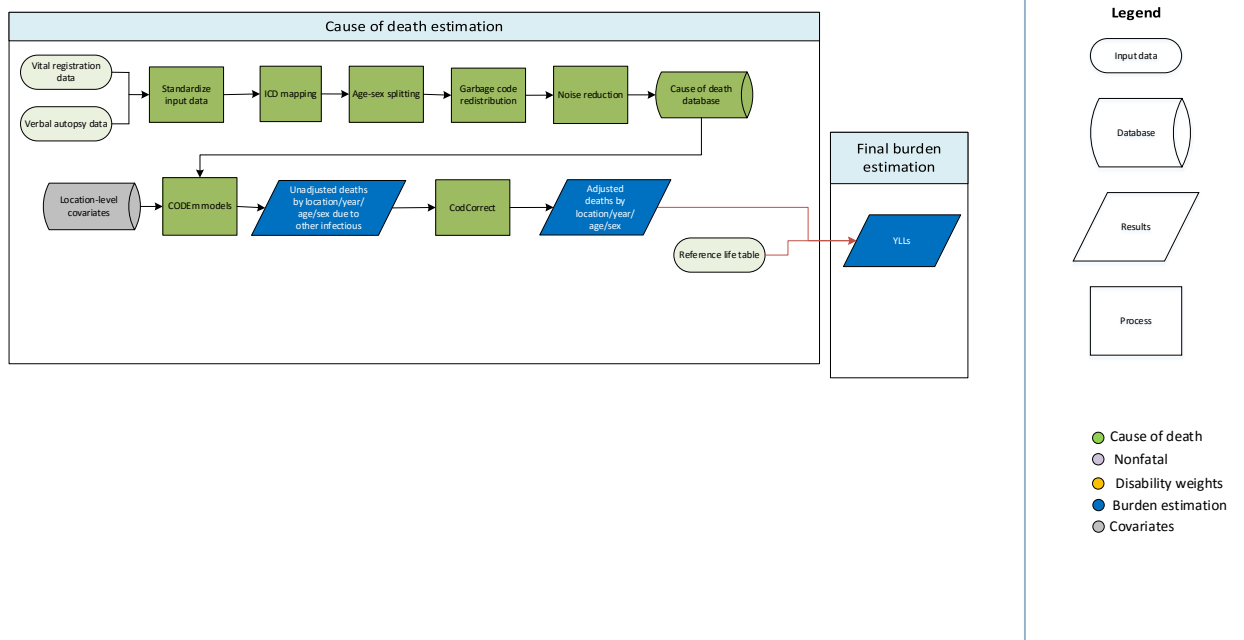

### Input data

We modelled other infectious disease mortality using all available data in the cause of death database. Data points were outliered if they reported an improbable number of deaths or if their inclusion in the model yielded distorted trends. In some cases multiple data sources for the same location differed dramatically both in their quality and reported other infectious diseases mortality (eg, a verbal autopsy and vital registration source). In these cases the lower-quality data source was outliered.

### Modelling strategy

We modeled other infectious disease mortality using a two-model hybrid approach: 1) a global CODEm model of all locations, using all data in the CoD database; and 2) a CODEm model restricted to data-rich countries.

Since GBD 2013 we have switched from a single global model to the hybrid global/data-rich model approach. We have otherwise made no substantive changes in the modelling strategy for other intestinal infectious diseases from GBD 2015.

## Cancers

Input data and methodological summary for all cancers except for non-melanoma skin cancer

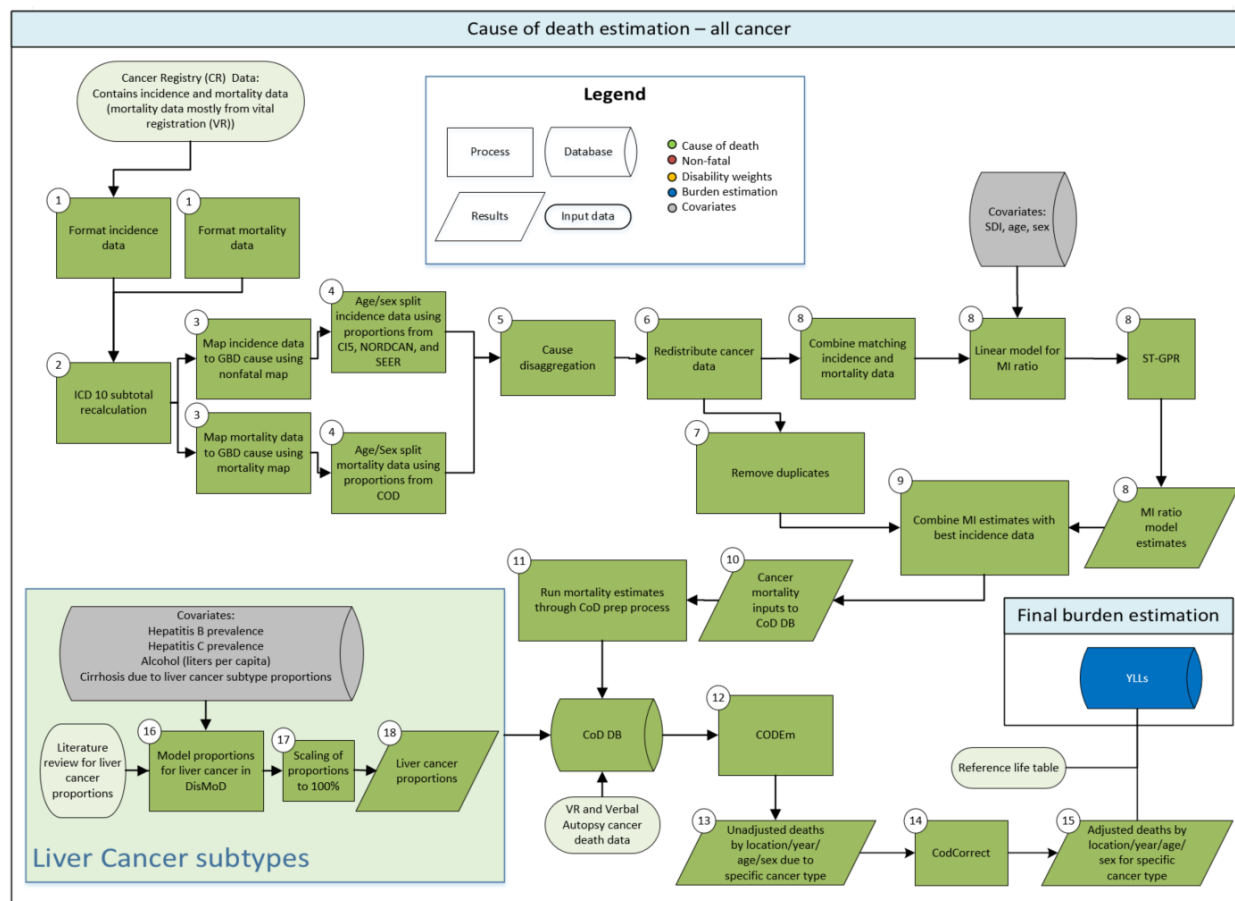

## Data

The cause of death (COD) database contains multiple sources of cancer mortality data. These sources include vital registration, verbal autopsy, and cancer registry data. The cancer registry mortality estimates that are uploaded into the COD database stem from cancer registry incidence data that have been transformed to mortality estimates through the use of mortality-to-incidence ratios (MIR).

### Data seeking processes

#### Cancer mortality data in the cause of death database other than cancer registry data

Sources for cancer mortality data other than cancer registry data are described in the COD database description (Section 2).

#### Cancer registry data

Cancer registry data were used from publicly available sources or provided by collaborators. We attempted to collect data from all registries that are members of the International Association of Cancer Registries (IACR) by either downloading publicly available data or contacting the registries. We also used cancer registry databases like Cancer Incidence in Five Continents (CI5), EUREG, and NORDCAN.<sup>1–9</sup>

Most cancer registries only report cancer incidence. However, if a cancer registry also reported cancer mortality, mortality data were also extracted from the source to be used in the MIR estimation.

#### *Inclusion and exclusion criteria*

Only population-based cancer registries were included, and only those that included all cancers (no specialty registries), data for all age groups, and data for both sexes. Pathology-based cancer registries were included if they had a defined population. Hospital-based cancer registries were excluded. Cancer registry data were excluded from either the final incidence data input or the MI model input if a more detailed source (e.g., providing more detailed age or diagnostic groups) was available for the same population. Preference was given to registries with national coverage over those with only local coverage, except those from countries where the GBD study provides subnational estimates. Data were excluded if the coverage population was unknown.

#### *Bias of categories of input data*

Cancer registry data can be biased in multiple ways. A high proportion of ill-defined cancer cases in the registry data requires redistribution of these cases to other cancers, which introduces a potential for bias. Changes between coding systems can lead to artificial differences in disease estimates; however, we adjust for this bias by mapping the different coding systems to the GBD causes. Underreporting of cancers that require advanced diagnostic techniques (e.g., leukemia and brain, pancreatic, and liver cancer) can be an issue in cancer registries from low-income countries. On the other hand, misclassification of metastatic sites as primary cancer can lead to overestimation of cancer sites that are common sites for metastases, like brain or liver. Since many cancer registries are located in urban areas, the representativeness of the registry for the general population can also be problematic. The accuracy of mortality data reported in cancer registries usually depends on the quality of the vital registration system. If the vital registration system is incomplete or of poor quality, the mortality-to-incidence ratio can be biased to lower ratios.

#### *Data for liver cancer etiology splits*

To find the proportion of liver cancer cases due to the four etiology groups included in GBD (1. Liver cancer due to hepatitis B, 2. Liver cancer due to hepatitis C, 3. Liver cancer due to alcohol, 4. Liver cancer due to other causes), a systematic literature search was performed in PubMed. Studies were included if the study population was representative of liver cancer population for the respective location. For each study the proportions of liver cancer due to the three specific risk factors were calculated. Remaining risk factors were included under a combined “other” group. Cryptogenic cases were only included if other etiologies like viral hepatitis or alcoholic cirrhosis had been excluded. If multiple risk factors were reported for an individual patient these were apportioned proportionally to the individual risk factors.

## **Methods**

#### *Steps of analysis and data transformation processes*

Cancer registry data went through multiple processing steps before integration with the COD database. First, the original data were transformed into standardized files, which included standardization of format, categorization, and registry names (#1 in flowchart).

Second, some cancer registries report individual codes as well as aggregated totals (e.g., C18, C19, and C20 are reported individually but the aggregated group of C18-C20 [colorectal cancer] is also reported in

the registry data). The data processing step “subtotal recalculation” (#2 in flowchart) verifies these totals and subtracts the values of any individual codes from the aggregates.

In the third step (#3 in the flowchart), cancer registry incidence data and cancer registry mortality data are mapped to GBD causes. A different map is used for incidence and for mortality data because of the assumption that there are no deaths for certain cancers. One example is basal cell carcinoma of the skin. In the cancer registry incidence data, basal cell carcinoma is mapped to non-melanoma skin cancer (basal cell carcinoma). However, if basal cell skin cancer is recorded in the cancer registry mortality data, the deaths are instead mapped to non-melanoma skin cancer (squamous cell carcinoma) under the assumption that they were indeed misclassified squamous cell skin cancers. Other examples are benign or in situ neoplasms. Benign or in situ neoplasms found in the cancer registry incidence dataset were simply dropped from that dataset. The same neoplasms reported in a cancer registry mortality dataset were mapped to the respective invasive cancer (e.g., melanoma in situ in the cancer registry incidence dataset was dropped from the dataset; melanoma in situ in the cancer registry mortality dataset was mapped to melanoma).

In the fourth data processing step (#4 in the flowchart) cancer registry data were standardized to the GBD age groups. Age-specific incidence rates were generated using CI5, SEER, and NORDCAN data, while age-specific mortality rates were generated from the CoD data through a method described in Part 2. Age-specific proportions were then generated by applying the age-specific rates to a given registry population that required age-splitting to produce the expected number of cases/deaths for that registry by age. The expected number of cases/deaths for each sex, age, and cancer were then normalized to 1, creating final, age-specific proportions. These proportions were then applied to the total number of cases/deaths by sex and cancer to get the age-specific number of cases/deaths.

In the rare case that the cancer registry only contained data for both sexes combined, the now-age-specific cases/deaths were split and re-assigned to separate sexes using the same weights that are used for the age-splitting process. Starting from the expected number of deaths, proportions were generated by sex for each age (e.g., if for ages 15 to 19 years old there are six expected deaths for males and four expected deaths for females, then 60% of the combined-sex deaths for ages 15-19 years would be assigned to males and the remaining 40% would be assigned to females).

In the fifth step (#5 in the flowchart) data for cause entries that are aggregates of GBD causes were redistributed. Examples of these aggregated causes include some registries reporting ICD10 codes C00-C14 together as, “lip, oral cavity, and pharyngeal cancer.” These groups were broken down into sub-causes that could be mapped to single GBD causes. In this example, those include lip and oral cavity cancer (C00-C08), nasopharyngeal cancer (C11), cancer of other parts of the pharynx (C09-C10, C12-C13), and “Malignant neoplasm of other and ill-defined sites in the lip, oral cavity, and pharynx” (C14). To redistribute the data, weights were created using the same “rate-applied-to-population” method employed in age-sex splitting (see step four above). For the undefined code (C14 in the example) an “average all cancer” weight was used, which was generated by adding all cases from SEER/NORDCAN/CI5 and dividing the total by the combined population. Then, proportions were generated by sub-cause for each aggregate cause as in the sex-splitting example above (see step four). The total number of cases from the aggregated group (C00-C14) was then recalculated for each

subgroup and the undefined code (C14). C14 was then redistributed as a “garbage code” in step six. Distinct proportions were used for C44 (non-melanoma skin cancer) and C46 (Kaposi’s sarcoma). Non-melanoma skin cancer processing is described under section “Input data and methodological summary for non-melanoma skin cancer (squamous-cell carcinoma).” C46 entries were redistributed as “other cancer,” HIV, and C80 (other and unknown cancers) using proportions described in Part 2. In the sixth step (#6 in the flowchart) unspecified codes (“garbage codes”) were redistributed. Redistribution of cancer registry incidence and mortality data mirrored the process of the redistribution used in the cause of death database (Part 2).

In the seventh step (#7 in the flowchart) duplicate or redundant sources were removed from the processed cancer registry dataset. Duplicate sources were present if, for example, the cancer registry was part of the CI5 database but we also had data from the registry directly. Redundancies occurred and were removed as described in “Inclusion and Exclusion Criteria,” where more detailed data were available, or when national registry data could replace regionally representative data. From here, two parallel selection processes were run to generate input data for the MI models and to generate incidence for final mortality estimation. Higher priority was given to registry data from the most standardized source when creating the final incidence input, whereas for the MI model input only sources that reported incidence and mortality were used. This is different to GBD 2015 where mortality and incidence could come from different sources as long as they covered the same population. In the eighth step (#8 in the flowchart) the processed incidence and mortality data from cancer registries were matched by cancer, age, sex, year, and location to generate MI ratios. These MI ratios were used as input for a three-step modelling approach using the general GBD ST-GPR approach with SDI as a covariate in the linear step mixed effects model using a logit link function. Predictions were made without the random effects. The ST-GPR model has three main hyper-parameters that control for smoothing across time, age, and geography. The time adjustment parameter ( $\lambda$ ) was set to 2, which aims to borrow strength from neighboring time points (i.e. the exposure in this year is highly correlated with exposure in the previous year but less so further back in time). The age adjustment parameter  $\omega$  was set to 0.5, which borrows strength from data in neighboring age groups. The space adjustment parameter  $\xi$  was set to 0.95 in locations with data and to 0.5 in locations without data (the higher  $\xi$  was applied when at least one age-sex group in the country of estimation had at least five unique data points. The lower  $\xi$  was applied when estimating data-scarce countries). Zeta aims to borrow strength across the hierarchy of geographical locations.<sup>10</sup> For the amplitude parameter in the Gaussian process regression we used 2 and for the scale we used a value of 15.

As in GBD 2015 we have modified the approach to estimate MI ratios. Since for GBD 2015 MI ratio predictions for some cancers yielded similar predictions for low-SDI countries without data as for high-SDI countries we refined the estimation process. Inclusion criteria for the MI ratio input data were changed to only include mortality and incidence data if they were reported by the same source. We excluded MI ratios reported in the CI5<sup>1,1-7</sup> since mortality data used for the calculation of these MI ratios by definition has to be independent from the cancer registry. We also revised the outlier process and excluded data based on the SDI quintile categorization rather than on development status. For each cancer, MI ratios from locations in SDI quintiles 1-4 (low to high-middle SDI) were dropped if they were below the median of MI ratios from locations in SDI quintile 5 (high SDI). We also dropped MI ratios from locations in SDI quintiles 1-4 if the MI ratios were above the third quartile + 1.5 \* IQR (inter-quartile range). We dropped all MIR that were based on less than 25 cases to avoid noise due to small



numbers except for mesothelioma and acute lymphoid leukemia where we dropped MIR that were based on less than 10 cases because of lower data availability for these two cancers. We also aggregated incidence and mortality to the youngest 5-year age bin where we had at least 50 data points to avoid MIR predictions in young age groups that were based on few data points. The MIR in the age-bin that was used to aggregate MIR to, was used to backfill the MIR for younger age groups.

Since MI ratios can be above 1, especially in older age groups and cancers with low cure rates, we used the 95<sup>th</sup> percentile of the cleaned dataset that only included MIR that were based on 50 or more cases, to cap the MIR input data. This “upper cap” was used to allow MIR over 1 but to constrain the MIR to a maximum level. To run the logit model, the input data was divided by the upper caps and model predictions after ST-GPR was rescaled by multiplying them by the upper caps.

Upper caps used for GBD 2016 were the following:

| Age group | Maximum MIR |
|-----------|-------------|
| 0-4       | 0.57        |
| 5-9       | 0.69        |
| 10-14     | 0.81        |
| 15-19     | 0.84        |
| 20-24     | 0.72        |
| 25-29     | 0.62        |
| 30-34     | 0.69        |
| 35-39     | 0.78        |
| 40-44     | 0.86        |
| 45-49     | 0.89        |
| 50-54     | 0.92        |
| 55-59     | 0.95        |
| 60-64     | 0.99        |
| 65-69     | 1.04        |
| 70-74     | 1.10        |
| 75-79     | 1.17        |
| 80+       | 1.32        |

To constrain the model at the lower end, we used the 5<sup>th</sup> percentile of the cancer specific cleaned MIR input data to replace all model predictions with this lower cap.

Final MI ratios were matched with the cancer registry incidence dataset in the ninth step (#9 in the flowchart) to generate mortality estimates (Incidence \* Mortality/Incidence = Mortality) (#10 in the flowchart). The final mortality estimates were then uploaded into the COD database (#11 in the flowchart). Cancer-specific mortality modelling then followed the general CODEm process.

#### *Liver cancer etiology split models*

The proportion data found through the systematic literature review were used as input for four separate DisMod-MR 2.1 models to determine the proportion of liver cancers due to the four subgroups for all locations, both sexes, and all age groups (step #16 in the flowchart). A study covariate was used for

publications that only assessed liver cancer in a cirrhotic population. The reference or “gold standard” that was used for crosswalking was the compilation of all studies that assessed the etiology of liver cancer in a general population. For liver cancer due to hepatitis C and hepatitis B, a prior value of 0 was set between age 0 and 0.01. For liver cancer due to alcohol a prior value of 0 was set for ages 0 to 5 years. For liver cancer due to hepatitis C, hepatitis C (IgG) seroprevalence was used as a covariate as well as a covariate for alcohol (liters per capita) and hepatitis B prevalence (HBsAg seroprevalence), forcing a negative relationship between the alcohol and hepatitis B covariate and the outcome of liver cancer due to hepatitis C proportion. For liver cancer due to hepatitis B, seroprevalence of HBsAg was used as a covariate as well as a covariate for alcohol and hepatitis C IgG seroprevalence, forcing a negative relationship between the alcohol and hepatitis C covariate and the outcome of liver cancer due to hepatitis B proportion. For liver cancer due to alcohol, alcohol (liters per capita) was used as a covariate as well as a covariate for proportion of alcohol abstainers, hepatitis B and hepatitis C seroprevalence, forcing a negative relationship between the proportion of alcohol abstainers, hepatitis B and hepatitis C covariates and the outcome of liver cancer due to alcohol proportion. All covariates used were modelled independently. To ensure consistency between cirrhosis and liver cancer estimates and to take advantage of the data for the respective other related cause (e.g. liver cancer due to hepatitis C and the related cause cirrhosis due to hepatitis C), we generated covariates from the liver cancer proportion models that we used in the cirrhosis etiology proportion models. We then created covariates from the cirrhosis etiology proportion models and used those in the liver cancer etiology models.

Since the proportion models are run independently of each other, the final proportion models were scaled to sum to 100% within each age, sex, year, and location, by dividing each proportion by the sum of the four (step # 17). For the liver cancer subtype mortality estimates, we multiplied the parent cause “liver cancer” by the corresponding scaled proportions (step # 18). Single cause estimates were adjusted to fit into the separately modelled all-cause mortality in the process CoDCorrect.

## Results

### Interpretation of results

Cancer mortality estimates for GBD 2016 can differ from the GBD 2015 results for multiple reasons. Updated cancer mortality data were added from vital registration system data, verbal autopsy studies, as well as cancer registry incidence data. Mapping of cancer ICD codes to the GBD cancer causes was updated slightly based on collaborator comments. Mapping for the ICD10 code D46 (myelodysplastic syndrome) was changed back to “other cancer” as it had been in GBD 2013 based on collaborator comments and the consideration of adding myelodysplastic syndrome as a separate cause for future GBD iterations. To improve estimation of the leukemia sub-causes, a new cause, “leukemia other” was added since not all leukemia subtypes can be mapped the four most common types (acute and chronic lymphoid and myeloid leukemia). The mortality-to-incidence ratio estimation has changed compared to GBD 2015. Covariate inputs for the CODEm models were changed based on recommendations from collaborators. Covariates used in CODEm models were updated for GBD 2016.

The other group producing country-level cancer mortality estimates is the International Agency for Research on Cancer (IARC) with their GLOBOCAN database. Significantly different methods between the GBD study and GLOBOCAN can lead to differences in results. Whereas estimates in GLOBOCAN are based on the assumption that there are “In theory, [...] as many methods as countries,”<sup>11</sup> the cancer estimation process for the GBD study follows a coherent, well-documented method for all cancers,

which allows cross-validation of models as well as determination of uncertainty. Another major difference is the ability in the GBD study to adjust single cause estimates to the all-cause mortality, which is being determined independently. This also allows us to adjust individual causes of death to the all-cause mortality envelope which permits us to correct for the underdiagnosis of cancer in countries with inadequate diagnostic resources. Redistribution of a fraction of undefined causes of death to certain cancers is another methodical advantage the GBD study has over GLOBOCAN, and estimates for cancer mortality can therefore differ substantially in countries with a large proportion of undefined causes of deaths in their vital registration data or a large proportion of undefined cancer cases in their cancer registry data.

## Limitations

There are certain limitations to consider when interpreting the GBD mortality cancer estimates. First, even though every effort is made to include the most recently available data for each country, data-seeking resources are not limitless and new data cannot always be accessed as soon as they are made available. It is therefore possible that the GBD study does not include all available data sources for cancer incidence or cancer mortality. Second, different redistribution methods can potentially change the cancer estimates substantially if the data sources used for the estimated location contain a large number of undefined causes; however, neglecting to account for these undefined deaths would likely introduce an even greater bias in the disease estimates. Third, using mortality-to-incidence ratios to transform cancer registry incidence data to mortality estimates requires accurate MIR. For GBD 2016 we have made further changes to the MIR estimation, but the method remains sensitive to underdiagnosis of cancer cases or underascertainment of cancer deaths. However, given that the majority of data used for the cancer mortality estimation come from vital registration data and not cancer registry data this is not a major limitation.

## Non-melanoma skin cancer (squamous-cell carcinoma)

### Data

#### *Data seeking processes*

The input data were identified and processed using the same methods as all other cancers described above.

#### *Inclusion and exclusion criteria*

Inclusion and exclusion criteria followed the same methods as described for other cancers (see above).

#### *Bias of categories of input data*

The potential biases of the input data are the same as for other cancers (see above).

### Methods

#### *Overall methodological process*

The GBD produces estimates for non-melanoma skin cancer via two subgroups: non-melanoma skin cancer (basal cell carcinoma) and non-melanoma skin cancer (squamous cell carcinoma). While some cancer registries report non-melanoma skin cancer at the four- or five- digit level required to distinguish between the subtypes (eg, "C44.01" versus "C44.02", "173.01" versus "173.02"), most registries report these cancers at the three-digit level as "C44" or "173" ("Other and unspecified malignant neoplasm of skin"). Because of this, those incident cases that were reported at this three-digit level were split to

“basal cell carcinoma” and “squamous cell carcinoma” based on proportions reported by Karagas et al during the cause disaggregation step (step #5 in the flowchart).<sup>12</sup> Since mortality estimates are produced for squamous cell carcinoma under the assumption that basal cell carcinoma causes almost no deaths, all mortalities reported as “C44” or “173” were mapped to the “squamous cell carcinoma” GBD cause. Apart from this additional step for some incident cases, the remainder of the cancer registry processing was the same as for other cancers as described above.

#### *Steps of analysis and data transformation processes*

Non-melanoma skin cancer (squamous cell carcinoma) mortality estimation followed the same steps as the other cancers (see flowchart and description above) except for step #5 in the flowchart as described above.

#### *Model selection*

The modelling strategy for non-melanoma skin cancer (squamous cell carcinoma) followed the general CODEm process.

#### *Model performance and sensitivity*

The modelling performance and sensitivity for non-melanoma skin cancer (squamous cell carcinoma) mirrored that of the general CODEm process.

#### *Uncertainty intervals*

Uncertainty was determined using standard CODEm methodology.

## Results

#### *Interpretation of results*

Non-melanoma skin cancer mortality estimates are not available from other sources. GLOBOCAN, for example, does not report deaths due to non-melanoma skin cancer. Even though the data availability for non-melanoma skin cancer is poor, the fact that it is the most common incident cancer with rates expected to rise makes it a necessity to include the disease in the GBD framework.

#### *Limitations*

Cancer registry data for non-melanoma skin cancer incidence have to be interpreted with caution due to a substantial amount of underreporting or rules that only the first non-melanoma skin cancer has to be registered. Many cancer registries therefore do not include non-melanoma skin cancers at all. For vital registration data we make the assumption that there are no deaths due to non-melanoma skin cancer (basal cell carcinoma), therefore all deaths attributed to basal cell carcinoma were included instead as squamous cell carcinoma.

## References

- 1 Waterhouse J, Muir C, Shanmugaratnam K, Powell J. Cancer Incidence in Five Continents IV. Lyon: IARC, 1982.
- 2 Curado M, Edwards B, Shin H, *et al.* Cancer Incidence in Five Continents IX. Lyon: IARC, 2007 <http://www.iarc.fr/en/publications/pdfs-online/epi/sp160/CI5vol9-A.pdf>.
- 3 Muir C, Mack T, Powell J, Whelan S. Cancer Incidence in Five Continents V. Lyon: IARC, 1987.
- 4 Parkin D, Muir C, Whelan S, Gao Y, Ferlay J, Powell J. Cancer Incidence in Five Continents VI. Lyon: IARC, 1992.
- 5 Parkin D, Whelan S, Ferlay J, Raymond L, Young J. Cancer Incidence in Five Continents VII. Lyon: IARC, 1997.
- 6 Parkin D, Whelan S, Ferlay J, Teppo L, Thomas D. Cancer Incidence in Five Continents VIII. Lyon: IARC, 2002.
- 7 Forman D, Bray F, Brewster D, *et al.* Cancer Incidence in Five Continents X. 2013. <http://ci5.iarc.fr>.
- 8 Engholm G, Ferlay J, Christensen N, *et al.* NORDCAN: Cancer Incidence, Mortality, Prevalence and Survival in the Nordic Countries, Version 7.3 Association of the Nordic Cancer Registries. Danish Cancer Society. 2016; published online Aug 7. <http://www.ancr.nu>.
- 9 Steliarova-Foucher E, O'Callaghan M, Ferlay J, Masuyer E, Forman D, Comber H, Bray F. European Cancer Observatory: Cancer Incidence, Mortality, Prevalence and Survival in Europe. Version 1.0 European Network of Cancer Registries, International Agency for Research on Cancer. 2012; published online Sept. <http://eco.iarc.fr>.
- 10 GBD 2015 Risk Factors Collaborators. Global, regional, and national comparative risk assessment of 79 behavioural, environmental and occupational, and metabolic risks or clusters of risks, 1990–2015: a systematic analysis for the Global Burden of Disease Study 2015. *The Lancet* 2016; **388**: 1659–724.
- 11 International Agency for Research on Cancer, World Health Organization. GLOBOCAN estimated cancer incidence, mortality, and prevalence worldwide in 2012. Lyon, France: IARC, 2014 <http://globocan.iarc.fr/Default.aspx> (accessed April 19, 2016).
- 12 Karagas MR, Greenberg ER, Spencer SK, Stukel TA, Mott LA. Increase in incidence rates of basal cell and squamous cell skin cancer in New Hampshire, USA. New Hampshire Skin Cancer Study Group. *Int J Cancer* 1999; **81**: 555–9.

## Cardiovascular Diseases

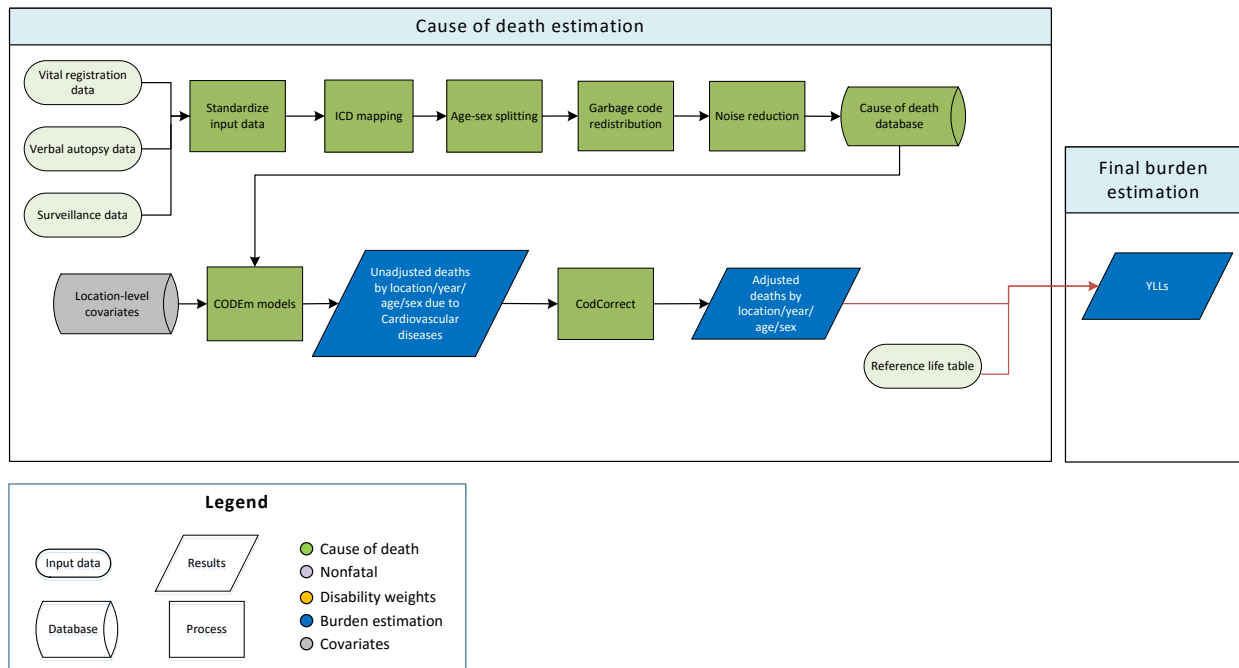

### Input data

Vital registration, verbal autopsy, and surveillance data were used to model this cause. We outliered non-representative subnational verbal autopsies from a number of Indian states. We also outliered verbal autopsy data sources that were implausibly low in all age groups and ICD8 and ICD9 BTL data points that were inconsistent with the rest of the data and created implausible time trends.

### Modelling strategy

We used a standard CODEm approach to model deaths from cardiovascular diseases. We have updated the covariates included in the ensemble modelling process (see Table). Otherwise, there have been no substantive changes from the approach used in GBD 2015.

**Table: Selected covariates for CODEm models, cardiovascular diseases**

| Covariate                               | Transformation | Level | Direction |
|-----------------------------------------|----------------|-------|-----------|
| Summary exposure variable               | None           | 1     | 1         |
| Cholesterol (total, mean per capita)    | None           | 1     | 1         |
| Smoking prevalence                      | None           | 1     | 1         |
| Systolic blood pressure (mmHg)          | None           | 1     | 1         |
| Trans fatty acid                        | None           | 1     | 1         |
| Mean BMI                                | None           | 2     | 1         |
| Elevation over 1500m (proportion)       | None           | 2     | -1        |
| Fasting plasma glucose (mmol/L)         | None           | 2     | 1         |
| Outdoor pollution (PM <sub>2.5</sub> )  | None           | 2     | 1         |
| Indoor air pollution (all fuel types)   | None           | 2     | 1         |
| Healthcare access and quality index     | None           | 2     | -1        |
| Lag distributed income per capita (I\$) | Log            | 3     | -1        |
| Socio-demographic Index                 | None           | 3     | 0         |
| Omega-3 (kcal/capita, adjusted)         | Log            | 3     | -1        |
| Fruits (kcal/capita, adjusted)          | None           | 3     | -1        |
| Vegetables (kcal/capita, adjusted)      | None           | 3     | -1        |
| Nuts and seeds (kcal/capita, adjusted)  | None           | 3     | -1        |
| Whole grains (kcal/capita, adjusted)    | None           | 3     | -1        |
| Pulses/legumes (kcal/capita, adjusted)  | None           | 3     | -1        |
| PUFA adjusted (percent)                 | None           | 3     | -1        |
| Alcohol (litres per capita)             | None           | 3     | 0         |

## Rheumatic Heart Disease

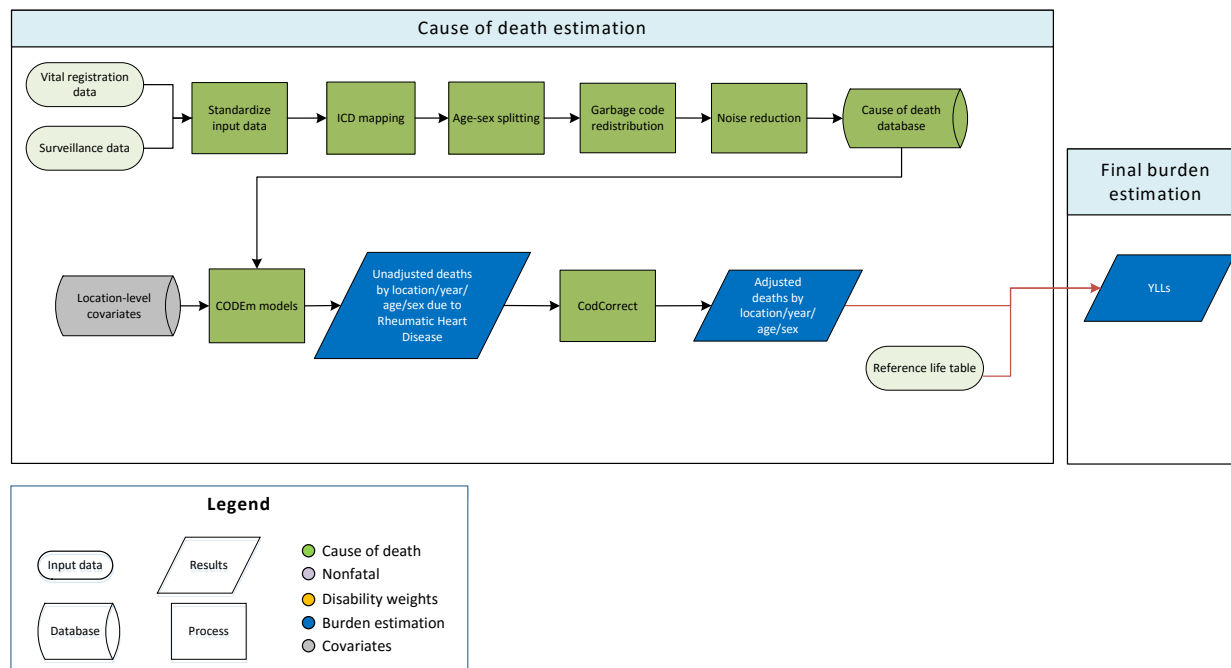

### Input data

Vital registration and surveillance data were used to model rheumatic heart disease. We outliered ICD8 and ICD9 BTL data points which were inconsistent with the rest of the data and created implausible time trends. We also outliered data points which were too high after the redistribution process in a number of age groups.

### Modelling strategy

We used a standard CODEm approach to model deaths from rheumatic heart disease. We have updated the covariates included in the ensemble modelling process (see Table). Otherwise, there have been no substantive changes from the approach used in GBD 2015.

**Table: Selected covariates for CODEm models, rheumatic heart disease**

| Covariate                           | Transformation | Level | Direction |
|-------------------------------------|----------------|-------|-----------|
| SEV                                 | None           | 1     | 1         |
| Improved water (proportion)         | None           | 1     | -1        |
| Malnutrition                        | None           | 1     | 1         |
| Sanitation (proportion with access) | None           | 1     | -1        |
| Healthcare access and quality index | None           | 2     | -1        |
| LDI                                 | Log            | 3     | -1        |
| SDI                                 | None           | 3     | -1        |
| Education (years per capita)        | None           | 3     | -1        |



## Ischemic Heart Disease

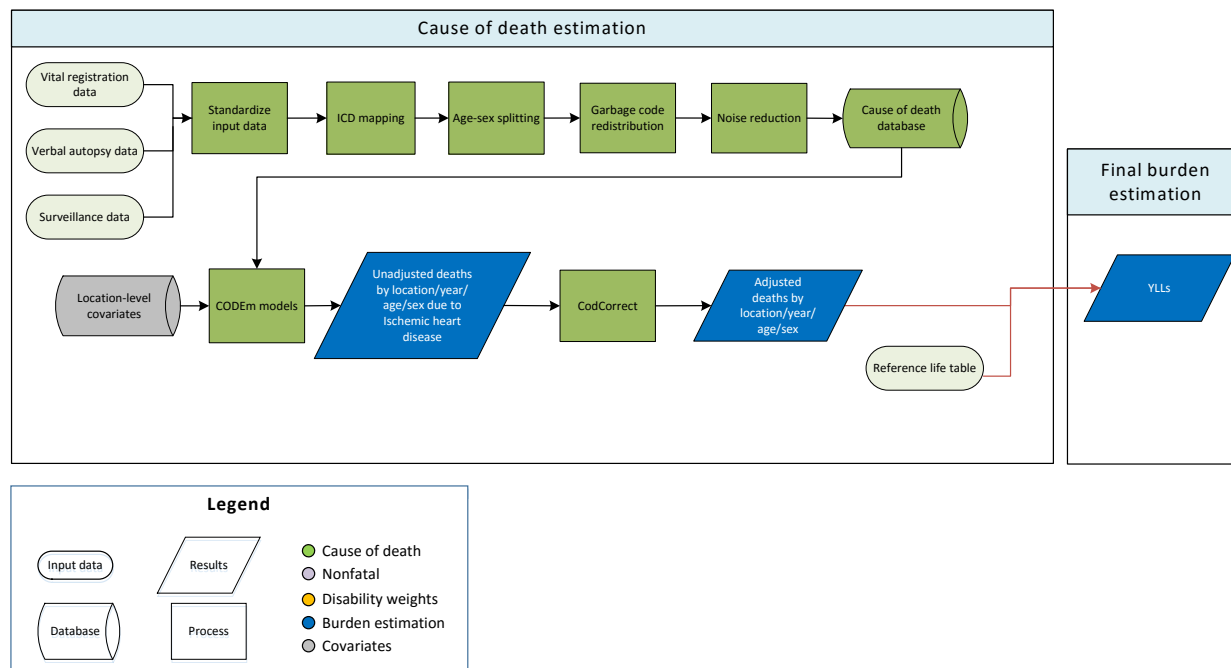

### Input data

Vital registration, verbal autopsy, and surveillance data were used to model ischemic heart disease. We outliered verbal autopsy data in countries and subnational locations where high-quality vital registration data were also available. We also outliered non-representative subnational verbal autopsy data points, ICD8 and ICD9 BTL data points which were inconsistent with the rest of the data and created implausible time trends, and data in a number of Indian states identified by experts as poor-quality.

### Modelling strategy

We used a standard CODEm approach to model deaths from ischemic heart disease. We have updated the covariates included in the ensemble modelling process (see Table). Otherwise, there have been no substantive changes from the approach used in GBD 2015.

**Table: Selected covariates for CODEm models, ischemic heart disease**

| Covariate                               | Transformation | Level | Direction |
|-----------------------------------------|----------------|-------|-----------|
| Summary exposure variable               | None           | 1     | 1         |
| Cholesterol (total, mean per capita)    | None           | 1     | 1         |
| Smoking prevalence                      | None           | 1     | 1         |
| Systolic blood pressure (mmHg)          | None           | 1     | 1         |
| Trans fatty acid                        | None           | 1     | 1         |
| Mean BMI                                | None           | 2     | 1         |
| Elevation over 1500m (proportion)       | None           | 2     | -1        |
| Fasting plasma glucose                  | None           | 2     | 1         |
| Outdoor pollution (PM <sub>2.5</sub> )  | None           | 2     | 1         |
| Indoor air pollution                    | None           | 2     | 1         |
| Healthcare access and quality index     | None           | 2     | -1        |
| Lag distributed income per capita (I\$) | Log            | 3     | -1        |
| Socio-demographic Index                 | None           | 3     | 0         |
| Omega-3 (kcal/capita, adjusted)         | Log            | 3     | -1        |
| Fruits (kcal/capita, adjusted)          | None           | 3     | -1        |
| Vegetables (kcal/capita, adjusted)      | None           | 3     | -1        |
| Nuts and seeds (kcal/capita, adjusted)  | None           | 3     | -1        |
| Whole grains (kcal/capita, adjusted)    | None           | 3     | -1        |
| Pulses/legumes (kcal/capita, adjusted)  | None           | 3     | -1        |
| PUFA adjusted (percent)                 | None           | 3     | -1        |
| Alcohol (litres per capita)             | None           | 3     | 0         |

## Cerebrovascular Disease

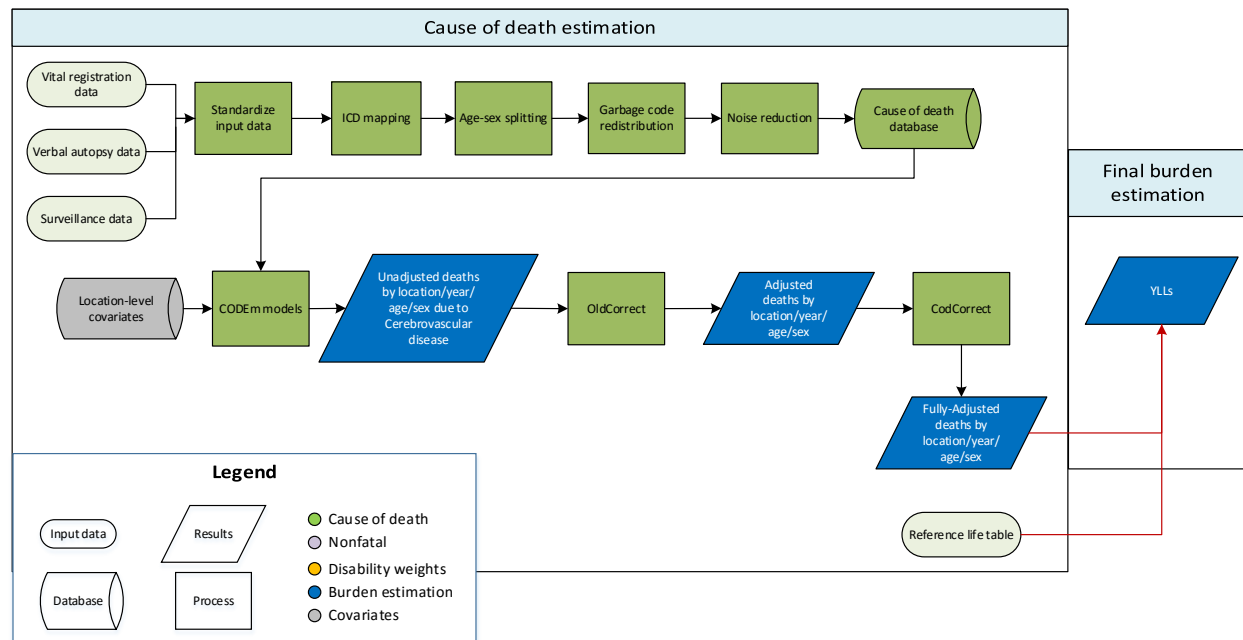

### Input data

Verbal autopsy and vital registration data were used to model cerebrovascular disease. We outliered non-representative subnational verbal autopsy data points. We reassigned deaths from verbal autopsy reports for cerebrovascular disease to the parent cardiovascular disease for both sexes for those under 20 years of age. We also outliered ICD8, ICD9 BTL, and ICD10 Tabulated data points which were inconsistent with the rest of the data and created implausible time trends. Data points from sources which were implausibly low in all age groups and data points that were causing the regional estimates to be improbably high were outliered.

### Modelling strategy

We used a standard CODEm approach to model deaths from cerebrovascular disease. The most significant update to the cerebrovascular method was the addition of a correction for miscoding of Alzheimer and other dementias and Parkinson disease to the post-CODEm adjustments to generate corrected cause-specific death estimates for final burden estimation. We have also updated the covariates included in the ensemble modelling process (see Table). Otherwise, there have been no substantive changes from the approach used in GBD 2015.

**Table: Selected covariates for CODEm models, cerebrovascular disease**

| Covariate                               | Transformation | Level | Direction |
|-----------------------------------------|----------------|-------|-----------|
| Summary exposure variable               | None           | 1     | 1         |
| Cholesterol (total, mean per capita)    | None           | 1     | 1         |
| Smoking prevalence                      | None           | 1     | 1         |
| Systolic blood pressure (mmHg)          | None           | 1     | 1         |
| Trans fatty acid                        | None           | 1     | 1         |
| Mean BMI                                | None           | 2     | 1         |
| Elevation over 1500m (proportion)       | None           | 2     | -1        |
| Fasting plasma glucose                  | None           | 2     | 1         |
| Outdoor pollution (PM <sub>2.5</sub> )  | None           | 2     | 1         |
| Indoor air pollution                    | None           | 2     | 1         |
| Healthcare access and quality index     | None           | 2     | -1        |
| Lag distributed income per capita (I\$) | Log            | 3     | -1        |
| Socio-demographic Index                 | None           | 3     | 0         |
| Omega-3 (kcal/capita, adjusted)         | Log            | 3     | -1        |
| Fruits (kcal/capita, adjusted)          | None           | 3     | -1        |
| Vegetables (kcal/capita, adjusted)      | None           | 3     | -1        |
| Nuts and seeds (kcal/capita, adjusted)  | None           | 3     | -1        |
| Whole grains (kcal/capita, adjusted)    | None           | 3     | -1        |
| Pulses/legumes (kcal/capita, adjusted)  | None           | 3     | -1        |
| PUFA adjusted (percent)                 | None           | 3     | -1        |
| Alcohol (litres per capita)             | None           | 3     | 0         |

# Ischemic Stroke

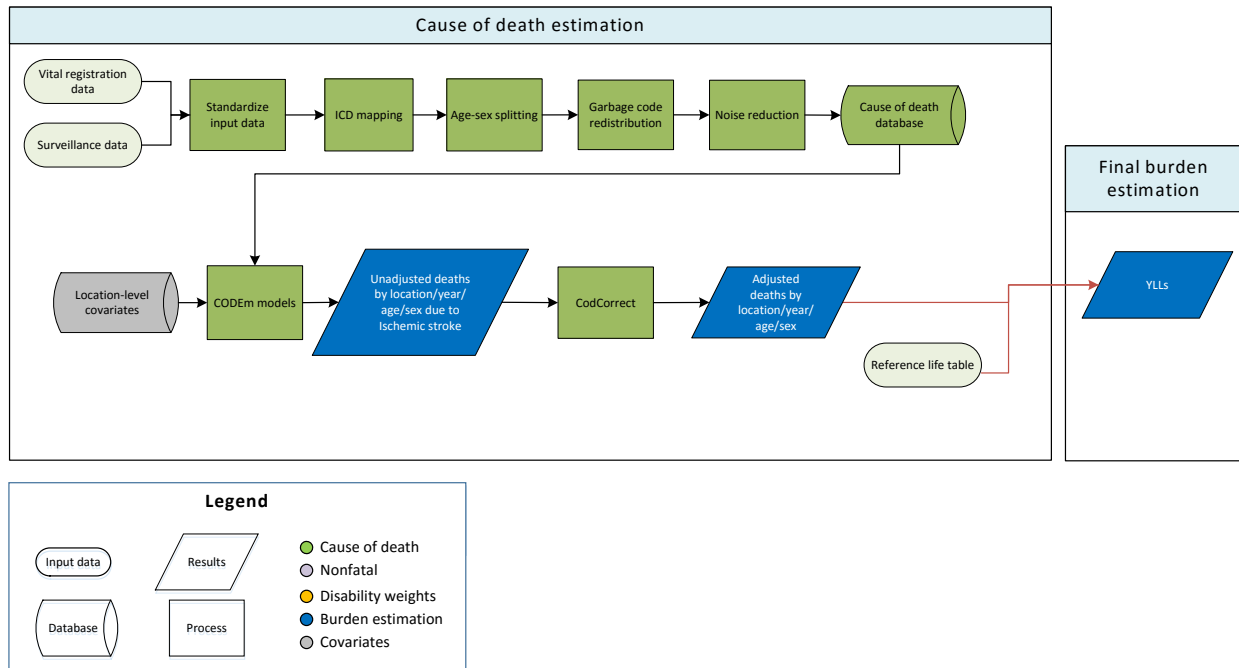

## Input data

Vital registration and surveillance data were used to model ischemic stroke. We reassigned deaths from verbal autopsy reports for ischemic stroke to the parent cardiovascular disease for both sexes for those under 20 years of age. We outliered ICD8 data points which were inconsistent with the rest of the data and created implausible time trends.

## Modelling strategy

We used a standard CODEm approach to model deaths from ischemic stroke. In locations with limited data on ischemic stroke, the subtype-specific deaths were estimated by squeezing both ischemic and hemorrhagic stroke to the overall cerebrovascular envelope. We have updated the covariates included in the ensemble modelling process (see Table). Otherwise, there have been no substantive changes from the approach used in GBD 2015.

**Table: Selected covariates for CODEm models, ischemic stroke**

| Covariate                               | Transformation | Level | Direction |
|-----------------------------------------|----------------|-------|-----------|
| Summary exposure variable               | None           | 1     | 1         |
| Cholesterol (total, mean per capita)    | None           | 1     | 1         |
| Smoking prevalence                      | None           | 1     | 1         |
| Systolic blood pressure (mmHg)          | None           | 1     | 1         |
| Trans fatty acid                        | None           | 1     | 1         |
| Mean BMI                                | None           | 2     | 1         |
| Elevation over 1500m (proportion)       | None           | 2     | -1        |
| Fasting plasma glucose                  | None           | 2     | 1         |
| Outdoor pollution (PM <sub>2.5</sub> )  | None           | 2     | 1         |
| Indoor air pollution                    | None           | 2     | 1         |
| Healthcare access and quality index     | None           | 2     | -1        |
| Lag distributed income per capita (I\$) | Log            | 3     | -1        |
| Socio-demographic Index                 | None           | 3     | 0         |
| Omega-3 (kcal/capita, adjusted)         | Log            | 3     | -1        |
| Fruits (kcal/capita, adjusted)          | None           | 3     | -1        |
| Vegetables (kcal/capita, adjusted)      | None           | 3     | -1        |
| Nuts and seeds (kcal/capita, adjusted)  | None           | 3     | -1        |
| Whole grains (kcal/capita, adjusted)    | None           | 3     | -1        |
| Pulses/legumes (kcal/capita, adjusted)  | None           | 3     | -1        |
| PUFA adjusted (percent)                 | None           | 3     | -1        |
| Alcohol (litres per capita)             | None           | 3     | 0         |

## Hemorrhagic Stroke

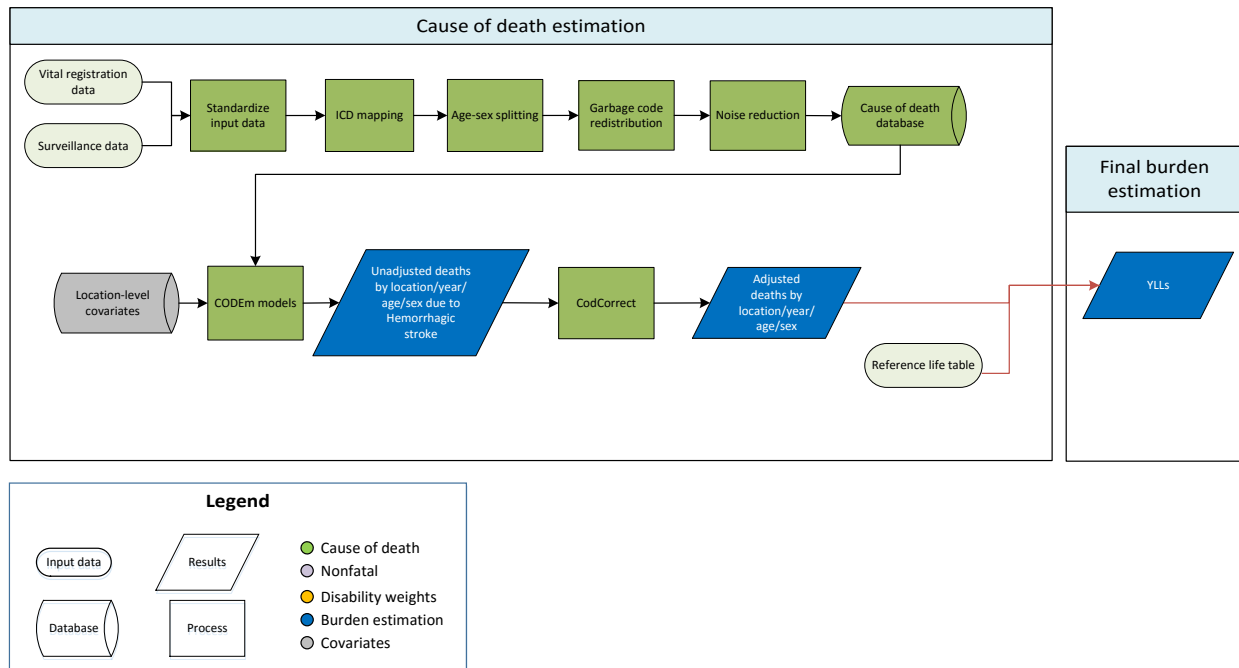

### Input data

Vital registration and surveillance data were used to model hemorrhagic stroke. We reassigned deaths from verbal autopsy reports for hemorrhagic stroke to the parent cardiovascular disease for both sexes for those under 20 years of age. We outliered ICD8 data points which were inconsistent with the rest of the data and created implausible time trends.

### Modelling strategy

We used a standard CODEm approach to model deaths from hemorrhagic stroke. In locations with limited data on hemorrhagic stroke, the subtype-specific deaths were estimated by squeezing both ischemic and hemorrhagic stroke to the overall cerebrovascular envelope. We have updated the covariates included in the ensemble modelling process (see Table). Otherwise, there have been no substantive changes from the approach used in GBD 2015.

**Table: Selected covariates for CODEm models, hemorrhagic stroke**

| Covariate                               | Transformation | Level | Direction |
|-----------------------------------------|----------------|-------|-----------|
| Summary exposure variable               | None           | 1     | 1         |
| Cholesterol (total, mean per capita)    | None           | 1     | 0         |
| Smoking prevalence                      | None           | 1     | 1         |
| Systolic blood pressure (mmHg)          | None           | 1     | 1         |
| Trans fatty acid                        | None           | 1     | 1         |
| Mean BMI                                | None           | 2     | 1         |
| Elevation over 1500m (proportion)       | None           | 2     | -1        |
| Fasting plasma glucose                  | None           | 2     | 1         |
| Outdoor pollution (PM <sub>2.5</sub> )  | None           | 2     | 1         |
| Indoor air pollution                    | None           | 2     | 1         |
| Healthcare access and quality index     | None           | 2     | -1        |
| Lag distributed income per capita (I\$) | Log            | 3     | -1        |
| Socio-demographic index                 | None           | 3     | 0         |
| Omega-3 (kcal/capita, adjusted)         | Log            | 3     | -1        |
| Fruits (kcal/capita, adjusted)          | None           | 3     | -1        |
| Vegetables (kcal/capita, adjusted)      | None           | 3     | -1        |
| Nuts and seeds (kcal/capita, adjusted)  | None           | 3     | -1        |
| Whole grains (kcal/capita, adjusted)    | None           | 3     | -1        |
| Pulses/legumes (kcal/capita, adjusted)  | None           | 3     | -1        |
| PUFA adjusted (percent)                 | None           | 3     | -1        |
| Alcohol (litres per capita)             | None           | 3     | 0         |



# Hypertensive Heart Disease

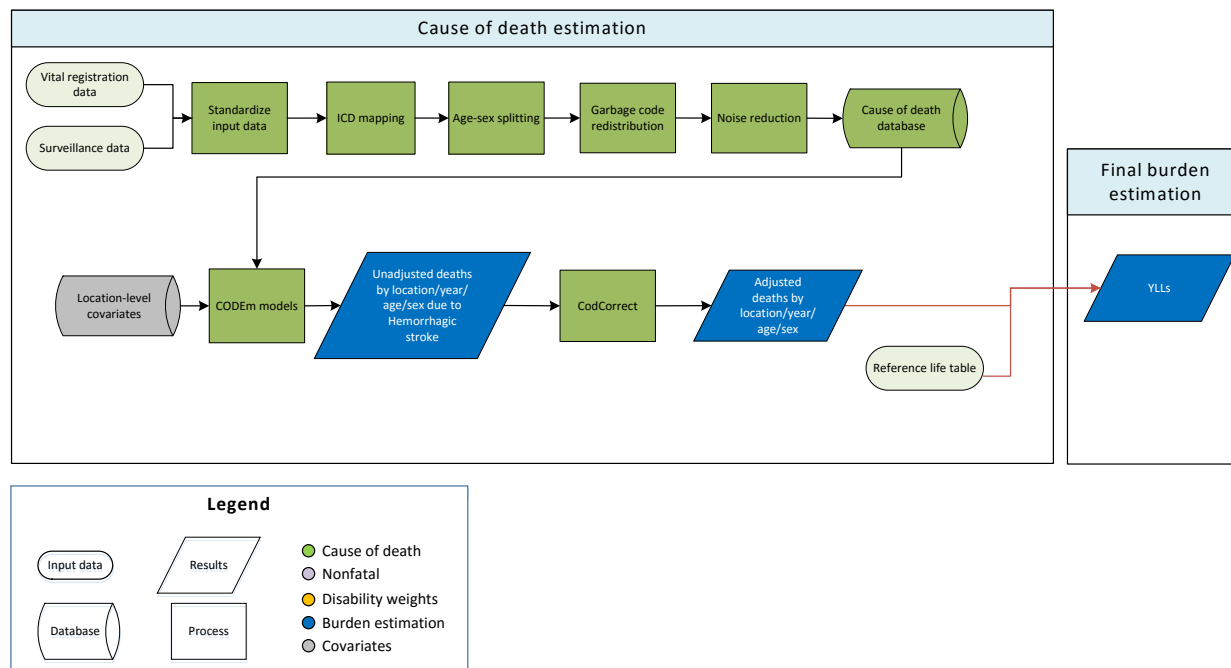

## Input data

Vital registration and surveillance data were used to model hypertensive heart disease. We outliered ICD9 BTL data points, which were inconsistent with the rest of the data and created implausible time trends.

## Modelling strategy

We used a standard CODEm approach to model deaths from cardiovascular diseases. We have updated the covariates included in the ensemble modelling process (see Table). Otherwise, there have been no substantive changes from the approach used in GBD 2015.

**Table: Selected covariates for CODEm models, hypertensive heart disease**

| Covariate                               | Transformation | Level | Direction |
|-----------------------------------------|----------------|-------|-----------|
| Cholesterol (total, mean per capita)    | None           | 1     | 1         |
| Smoking prevalence                      | None           | 1     | 1         |
| Systolic blood pressure (mmHg)          | None           | 1     | 1         |
| Mean BMI                                | None           | 2     | 1         |
| Healthcare access and quality index     | None           | 2     | -1        |
| Lag distributed income per capita (I\$) | Log            | 3     | -1        |
| Socio-demographic index                 | None           | 3     | 0         |

## Myocarditis

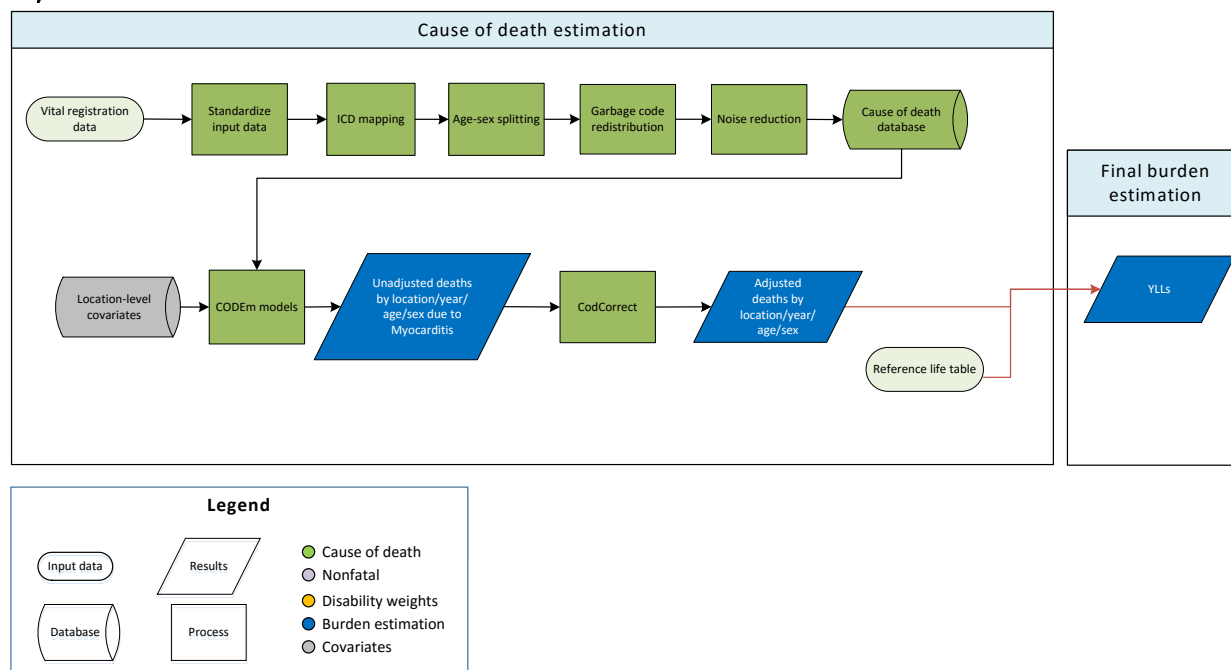

### Input data

Vital registration data were used to model deaths due to myocarditis.

### Modelling strategy

We used a standard CODEm approach to model deaths from myocarditis. This is one of three new sub-causes under the cardiomyopathy and myocarditis parent cause for GBD 2016. The covariates selected for inclusion in the CODEm modelling process can be found in the table below.

**Table: Selected covariates for CODEm models, myocarditis**

| Covariate                               | Transformation | Level | Direction |
|-----------------------------------------|----------------|-------|-----------|
| Summary exposure variable, CMP          | none           | 1     | 1         |
| Systolic blood pressure (mm Hg)         | none           | 1     | 1         |
| Healthcare access and quality index     | none           | 2     | -1        |
| Lag distributed income per capita (I\$) | log            | 3     | 0         |
| Socio-demographic Index                 | none           | 3     | 0         |

## Alcoholic Cardiomyopathy

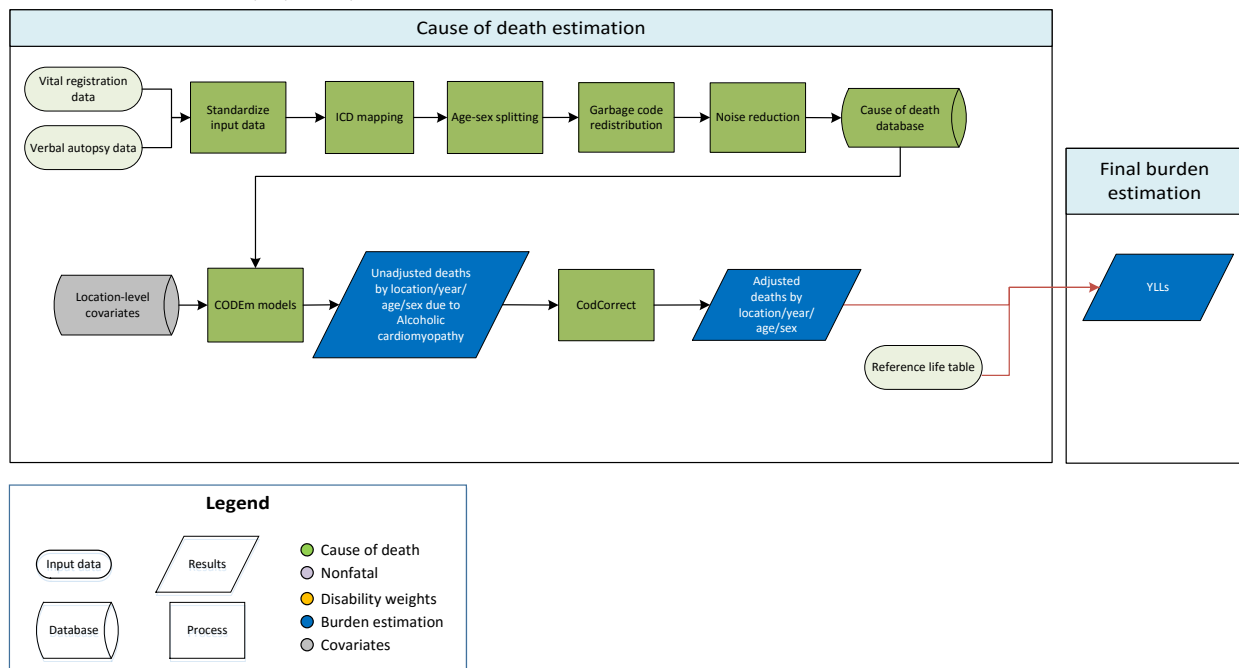

### Input data

Vital registration and verbal autopsy data were used to model deaths due to alcoholic cardiomyopathy. We outliered ICD9 data points in Cyprus that were implausibly high and discontinuous with the rest of the time series.

### Modelling strategy

We used a standard CODEm approach to model deaths from alcoholic cardiomyopathy. This is one of three new sub-causes under the cardiomyopathy and myocarditis parent cause for GBD 2016. The covariates selected for inclusion in the CODEm modelling process can be found in the table below. As local differences in coding practices may explain some of the geographic variation that we see for deaths due to cardiomyopathy and myocarditis, we plan to explore how this issue may affect the alcoholic cardiomyopathy sub-cause further in future iterations of GBD.

**Table: Selected covariates for CODEm models, alcoholic cardiomyopathy**

| Covariate                               | Transformation | Level | Direction |
|-----------------------------------------|----------------|-------|-----------|
| Summary exposure variable, CMP          | none           | 1     | 1         |
| Smoking prevalence                      | none           | 1     | 1         |
| Alcohol (litres per capita)             | none           | 1     | 1         |
| Healthcare access and quality index     | none           | 2     | -1        |
| Lag distributed income per capita (I\$) | log            | 3     | 0         |
| Socio-demographic Index                 | none           | 3     | 0         |

## Other cardiomyopathy

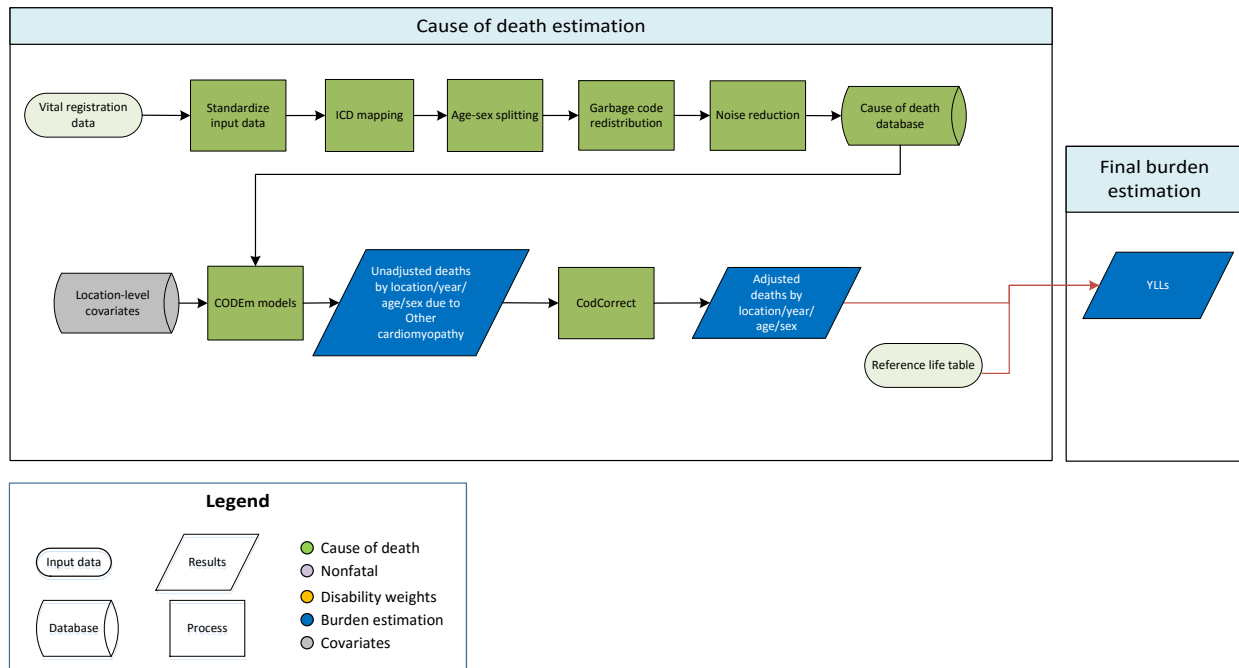

### Input data

Vital registration data were used to model deaths due to other cardiomyopathy. We outliered data points in Central Asia and Central and Eastern Europe due to implausibly high values which we attributed to variation in local coding practices after review with experts.

### Modelling strategy

We used a standard CODEm approach to model deaths from other cardiomyopathy. This is one of three new sub-causes under the cardiomyopathy and myocarditis parent cause for GBD 2016. The covariates selected for inclusion in the CODEm modelling process can be found in the table below. As local differences in coding practices may explain some of the geographic variation that we see for deaths due to cardiomyopathy and myocarditis, we plan to explore how this issue may affect the other cardiomyopathy sub-cause further in future iterations of GBD.

**Table: Selected covariates for CODEm models, other cardiomyopathy**

| Covariate                               | Transformation | Level | Direction |
|-----------------------------------------|----------------|-------|-----------|
| Summary exposure variable, CMP          | none           | 1     | 1         |
| Systolic blood pressure (mmHg)          | none           | 1     | 1         |
| Smoking prevalence                      | none           | 1     | 1         |
| Body mass index (kg/m <sup>2</sup> )    | none           | 2     | 1         |
| Healthcare access and quality index     | none           | 2     | -1        |
| Lag distributed income per capita (I\$) | log            | 3     | 0         |
| Socio-demographic Index                 | none           | 3     | 0         |

# Atrial Fibrillation and Flutter

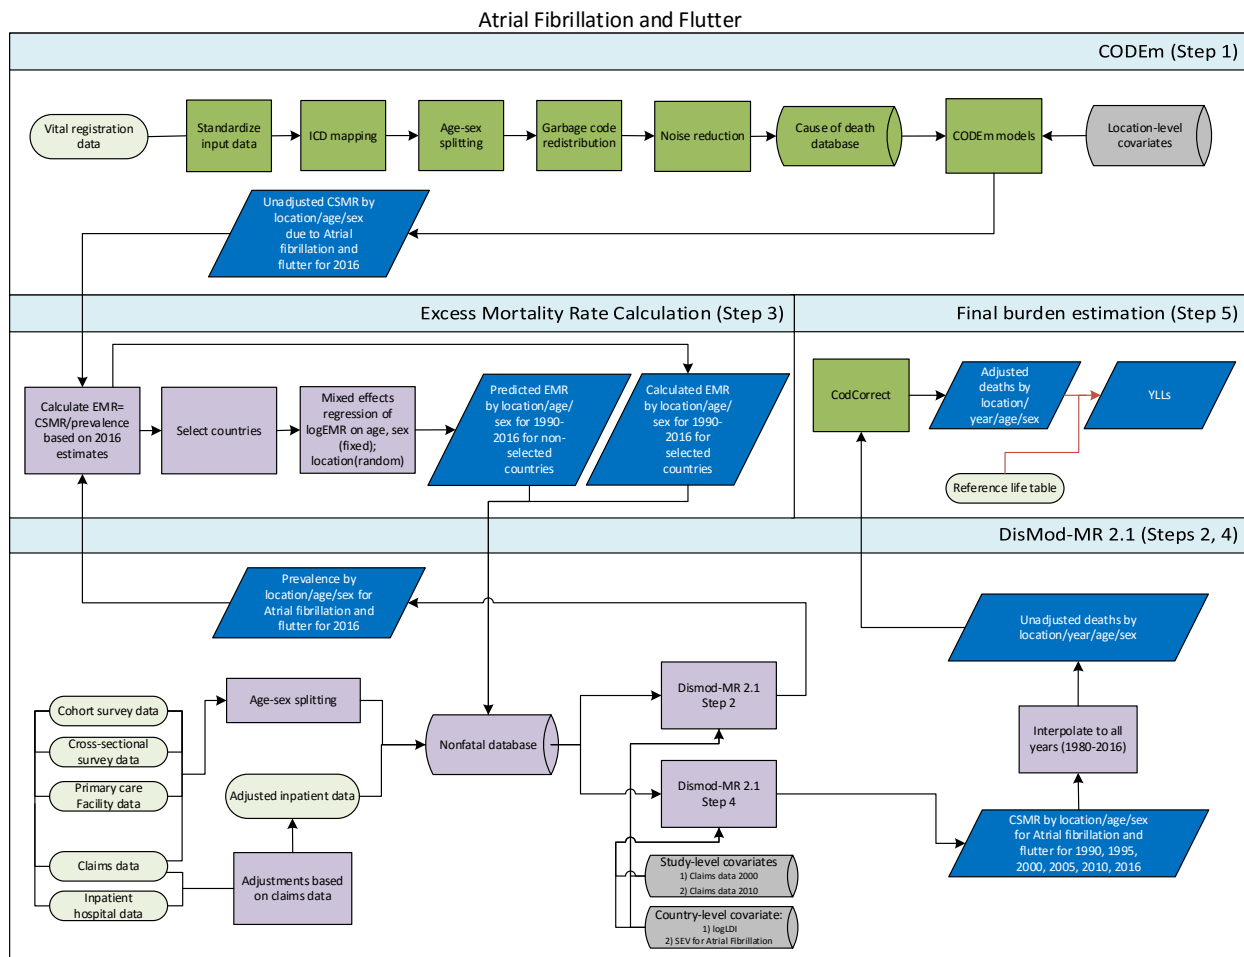

## Input data

Vital registration data: We outliered ICD8 and ICD9 data points that were discontinuous from other data in the time series and created an unlikely time trend. We also outliered data points that were implausibly low in multiple age groups.

## Modelling strategy

In order to address changes in coding practices for atrial fibrillation, we used an integrated approach that combined DisMod-MR and CODEm models to estimate deaths from atrial fibrillation and flutter. This approach allowed us to adjust estimates to more accurately reflect the number of deaths for which atrial fibrillation was the true underlying cause of death.

The modelling steps are illustrated in the above flowchart. Covariates included in both the DisMod-MR 2.1 and CODEm models can be found in the table below. In Step 1, we estimated deaths for atrial fibrillation using a standard CODEm approach. In Step 2, we estimated prevalence rates in DisMod-MR 2.1 using data from published reports of cross-sectional and cohort surveys, as well as primary care facility data. We also used claims data covering inpatient and outpatient visits for the United States

along with inpatient hospital data from 163 locations in 15 countries. For GBD 2016, inpatient hospital data were adjusted using age- and sex-specific information from US claims data for: 1) readmission within one year; 2) primary diagnosis code to secondary codes; and, 3) the ratio of inpatient to outpatient visits. We set priors of no remission and no excess mortality prior to age 30.

In Step 3, we calculated the excess mortality rate (EMR) for 2016 (defined as the cause-specific mortality rate (CSMR) estimated from CODEm divided by the prevalence rate from DisMod-MR 2.1). We then selected 17 countries based on four conditions: 1) ranking of 4 or 5 stars on the newly developed system for assessing the quality of VR data; 2) prevalence data available from the literature was included in the DisMod-MR 2.1 estimation; 3) prevalence rate  $\geq 0.005$ ; and, 4) CSMR  $\geq 0.00002$ . Using information from these countries as input data, we ran a linear mixed-effects regression of logEMR on sex, age, and location. Sex and age were treated as fixed effects for the regression, while location was considered a random effect. We then predicted age- and sex-specific EMR using the results of this regression for all non-selected countries. Countries included in the regression were assigned their directly calculated values. These EMR data points were assigned to the time period 1990–2016 and uploaded into the nonfatal database in order to be used in modelling.

In Step 4, we reran DisMod-MR 2.1 including the EMR estimated in Step 3 as input data using the same priors as in Step 2. The CSMR from the DisMod-MR model in Step 4 was used as the finalized output. As DisMod-MR 2.1 only generates estimates for six years (1990, 1995, 2000, 2005, 2010, 2016), we interpolated the missing years to generate death estimates for all years (1980–2016). These results were then uploaded into the Cause of Death database. Finally, in Step 5, the unadjusted death estimates were run through the CoDCorrect process to generate adjusted deaths, and YLLs were generated by the DALYnator using a standard reference life table.

CODEm Covariates

| Covariate                               | Transformation | Level | Direction |
|-----------------------------------------|----------------|-------|-----------|
| Summary exposure variable               | None           | 1     | 1         |
| Cholesterol (total, mean per capita)    | None           | 1     | 1         |
| Smoking prevalence                      | None           | 1     | 1         |
| Systolic blood pressure (mmHg)          | None           | 1     | 1         |
| Mean BMI                                | None           | 2     | 1         |
| Elevation over 1500m (proportion)       | None           | 2     | -1        |
| Fasting plasma glucose                  | None           | 2     | 1         |
| Outdoor pollution (PM <sub>2.5</sub> )  | None           | 2     | 1         |
| Indoor air pollution                    | None           | 2     | 1         |
| Healthcare Access and Quality Index     | None           | 2     | -1        |
| Lag distributed income per capita (I\$) | Log            | 3     | -1        |
| Socio-demographic Index                 | None           | 3     | 0         |
| Omega-3 (kcal/capita, adjusted)         | Log            | 3     | -1        |
| Fruits (kcal/capita, adjusted)          | None           | 3     | -1        |
| Vegetables (kcal/capita, adjusted)      | None           | 3     | -1        |
| Nuts and seeds (kcal/capita, adjusted)  | None           | 3     | -1        |
| Whole grains (kcal/capita, adjusted)    | None           | 3     | -1        |
| Pulses/legumes (kcal/capita, adjusted)  | None           | 3     | -1        |
| PUFA adjusted (percent)                 | None           | 3     | -1        |
| Alcohol (litres per capita)             | None           | 3     | 0         |
| Trans fatty acid                        | None           | 1     | 1         |

DisMod Covariates – Step 2

| Study covariate                                       | Parameter             | Beta                      | Exponentiated beta |
|-------------------------------------------------------|-----------------------|---------------------------|--------------------|
| Hospital data                                         | Prevalence            | -0.000086 (-0.19 – 0.097) | 1.0 (0.82 – 1.10)  |
| All MarketScan, year 2000                             | Prevalence            | -0.47 (-0.5 – -0.44)      | 0.63 (0.61 – 0.64) |
| All MarketScan, year 2010                             | Prevalence            | -0.003 (-0.024 – -0.014)  | 1.0 (0.98 – 1.01)  |
| Log-transformed age-standardized SEV scalar: A<br>Fib | Prevalence            | 0.75 (0.75 – 0.75)        | 2.12 (2.12 – 2.12) |
| LDI (I\$ per capita)                                  | Excess mortality rate | -0.48 (-0.5 – -0.43)      | 0.62 (0.61 – 0.65) |

DisMod Covariates – Step 4

| Study covariate                                       | Parameter             | Beta                      | Exponentiated beta |
|-------------------------------------------------------|-----------------------|---------------------------|--------------------|
| All MarketScan, year 2000                             | Prevalence            | -0.46 (-0.49 – -0.43)     | 0.63 (0.62 – 0.65) |
| All MarketScan, year 2010                             | Prevalence            | -0.0021 (-0.025 – -0.021) | 1.0 (0.98 – 1.02)  |
| Log-transformed age-standardized SEV scalar: A<br>Fib | Prevalence            | 0.75 (0.75 – 0.75)        | 2.12 (2.12 – 2.12) |
| LDI (I\$ per capita)                                  | Excess mortality rate | -0.1 (-0.1 – -0.1)        | 0.9 (0.9 – 0.9)    |

## Aortic Aneurysm

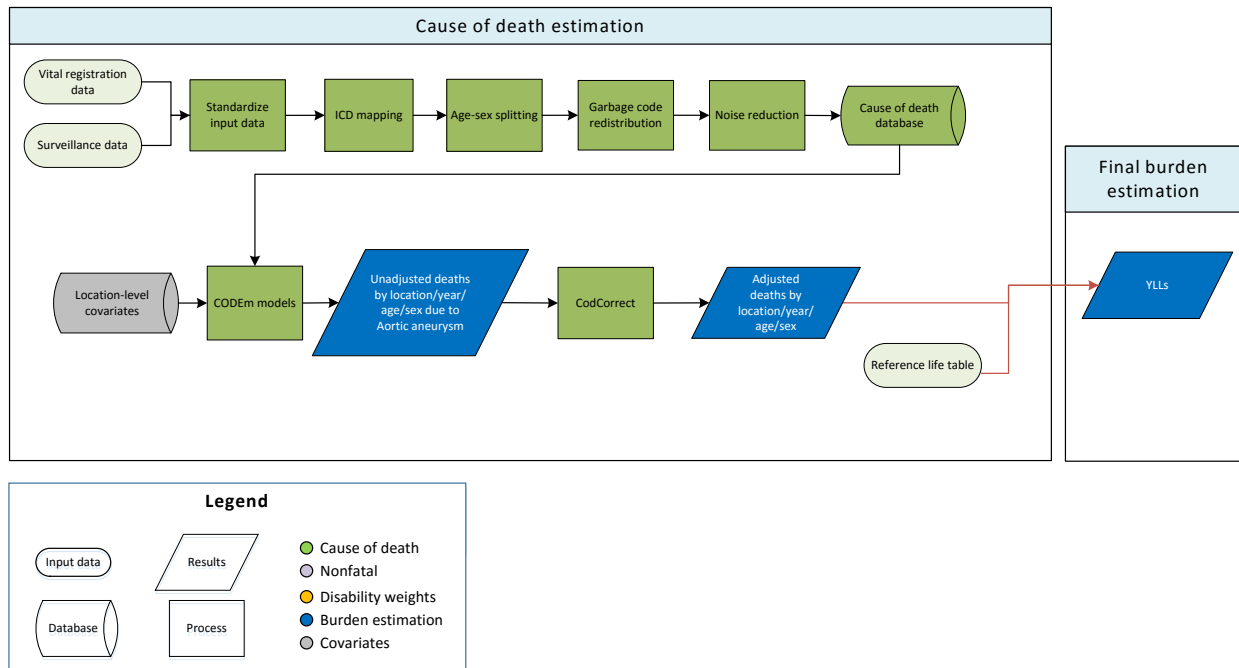

### Input data

Vital registration and surveillance data were used to model this cause. We outliered data in Oman as they were improbably high in comparison with the rest of the region. We also outliered ICD8 data that were discontinuous with the rest of the time series and created implausible time trends.

### Modelling strategy

We used a standard CODEm approach to model deaths from cardiovascular diseases. We have updated the covariates included in the ensemble modelling process (see Table). Otherwise, there have been no substantive changes from the approach used in GBD 2015.



**Table: Selected covariates for CODEm models, cardiovascular diseases**

| Covariate                               | Transformation | Level | Direction |
|-----------------------------------------|----------------|-------|-----------|
| Summary exposure variable               | None           | 1     | 1         |
| Cholesterol (total, mean per capita)    | None           | 1     | 1         |
| Cumulative cigarettes (10 yrs)          | None           | 1     | 1         |
| Systolic blood pressure (mmHg)          | None           | 1     | 1         |
| Trans fatty acid (percent)              | None           | 1     | 1         |
| Mean BMI                                | None           | 2     | 1         |
| Healthcare access and quality index     | None           | 2     | -1        |
| Lag distributed income per capita (I\$) | Log            | 3     | -1        |
| Socio-demographic Index                 | None           | 3     | 0         |
| Omega-3 (kcal/capita, adjusted)         | Log            | 3     | -1        |
| Fruits (kcal/capita, adjusted)          | None           | 3     | -1        |
| Vegetables (kcal/capita, adjusted)      | None           | 3     | -1        |
| Nuts and seeds (kcal/capita, adjusted)  | None           | 3     | -1        |
| Whole grains (kcal/capita, adjusted)    | None           | 3     | -1        |
| Pulses/legumes (kcal/capita, adjusted)  | None           | 3     | -1        |
| PUFA adjusted (percent)                 | None           | 3     | -1        |
| Alcohol (litres per capita)             | None           | 3     | 0         |

## Peripheral Artery Disease

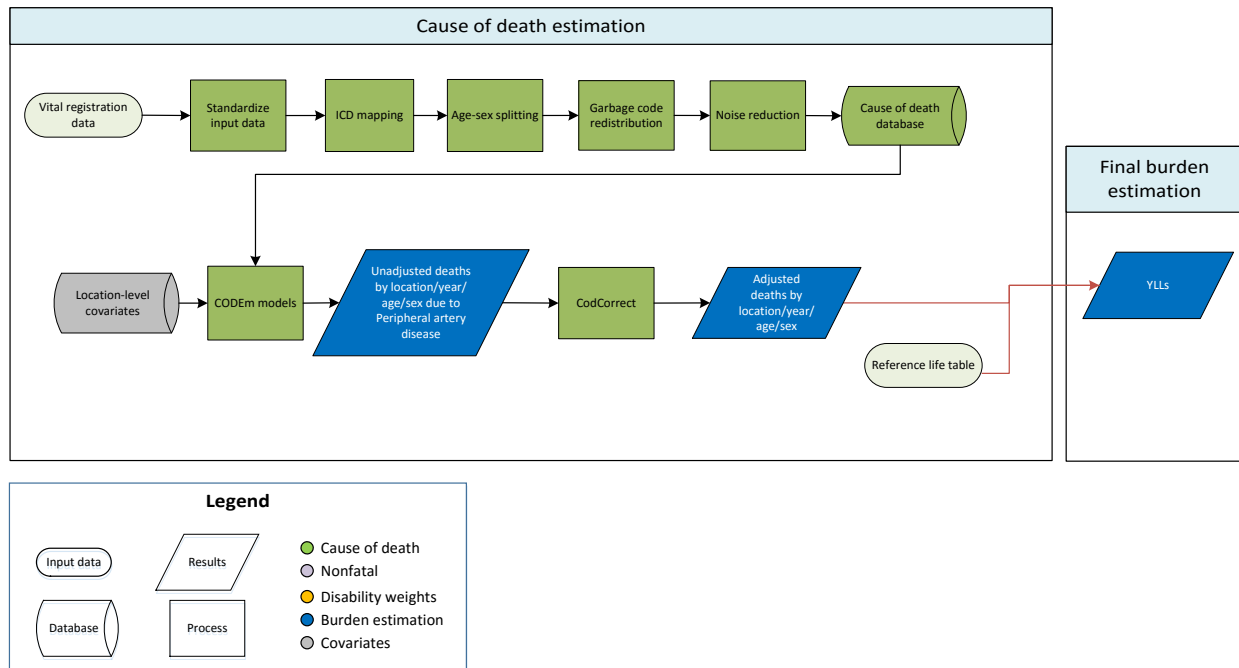

### Input data

Vital registration data were used to model peripheral artery disease. We outliered all data points with <1 death in Egypt per expert review.

### Modelling strategy

We used a standard CODEm approach to model deaths from peripheral artery disease. We have updated the covariates included in the ensemble modelling process (see Table). Otherwise, there have been no substantive changes from the approach used in GBD 2015.

**Table: Selected covariates for CODEm models, peripheral artery disease**

| Covariate                                 | Transformation | Level | Direction |
|-------------------------------------------|----------------|-------|-----------|
| Summary exposure variable                 | None           | 1     | 1         |
| Systolic blood pressure (mmHg)            | None           | 1     | 1         |
| Cholesterol (total, mean per capita)      | None           | 1     | 1         |
| Smoking prevalence                        | None           | 1     | 1         |
| Mean body mass index (kg/m <sup>2</sup> ) | None           | 2     | 1         |
| Healthcare access and quality index       | None           | 2     | -1        |
| Lag distributed income per capita (I\$)   | Log            | 3     | -1        |
| Socio-demographic Index                   | None           | 3     | 0         |
| Omega-3 (kcal/capita, adjusted)           | Log            | 3     | -1        |
| Fruits (kcal/capita, adjusted)            | None           | 3     | -1        |
| Vegetables (kcal/capita, adjusted)        | None           | 3     | -1        |
| Nuts and seeds (kcal/capita, adjusted)    | None           | 3     | -1        |
| Whole grains (kcal/capita, adjusted)      | None           | 3     | -1        |
| Pulses/legumes (kcal/capita, adjusted)    | None           | 3     | -1        |
| PUFA adjusted (percent)                   | None           | 3     | -1        |
| Trans fatty acid (percent)                | None           | 3     | 1         |
| Alcohol (litres per capita)               | None           | 3     | 0         |

## Endocarditis

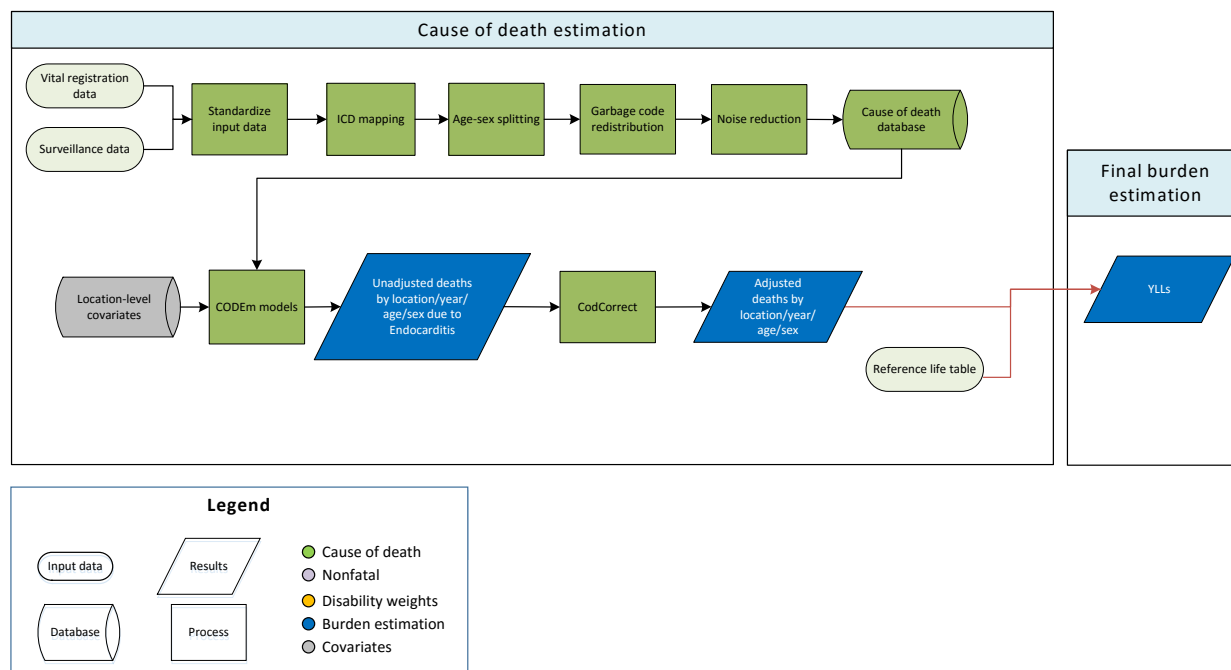

### Input data

Vital registration and surveillance data were used to model endocarditis. We outliered vital registration data in Mozambique as these were non-representative for sub-Saharan Africa and were causing regional estimates to be implausibly low. We also outliered ICD8 data that were discontinuous from the rest of the data series and created an implausible time trend.

### Modelling strategy

We used a standard CODEm approach to model deaths from endocarditis. We have updated the covariates included in the ensemble modelling process (see Table). Otherwise, there have been no substantive changes from the approach used in GBD 2015.

**Table: Selected covariates for CODEm models, endocarditis**

| Covariate                               | Transformation | Level | Direction |
|-----------------------------------------|----------------|-------|-----------|
| Summary exposure variable               | None           | 1     | 1         |
| Improved water (proportion)             | None           | 1     | -1        |
| Sanitation (proportion with access)     | None           | 1     | -1        |
| Healthcare access and quality index     | None           | 1     | -1        |
| Lag distributed income per capita (I\$) | Log            | 3     | -1        |
| Socio-demographic Index                 | None           | 3     | 0         |

## Other Cardiovascular and Circulatory Diseases

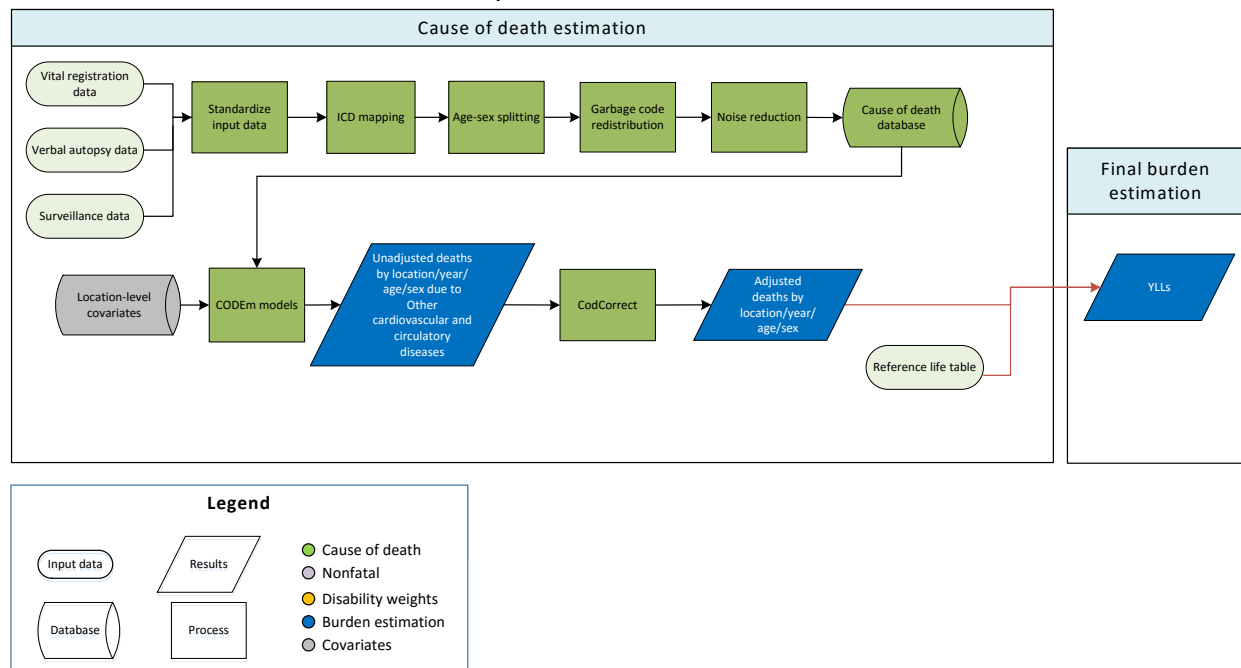

### Input data

Vital registration, verbal autopsy, and surveillance data were used to model other cardiovascular and circulatory diseases. We outliered ICD8 and ICD9 BTL data points that were inconsistent with the rest of the data and created implausible time trends. We also outliered ICD8 data points which were not nationally representative.

### Modelling strategy

We used a standard CODEm approach to model deaths from other circulatory and cardiovascular diseases. We have updated the covariates included in the ensemble modelling process (see Table). Otherwise, there have been no substantive changes from the approach used in GBD 2015.

**Table: Selected covariates for CODEm models, cardiovascular diseases**

| Covariate                                  | Transformation | Level | Direction |
|--------------------------------------------|----------------|-------|-----------|
| Summary exposure variable                  | None           | 1     | 1         |
| Cholesterol (total, mean per capita)       | None           | 1     | 1         |
| Smoking prevalence                         | None           | 1     | 1         |
| Systolic blood pressure (mmHg)             | None           | 1     | 1         |
| Trans fatty acid (percent)                 | None           | 1     | 1         |
| Mean BMI                                   | None           | 2     | 1         |
| Elevation over 1500m (proportion)          | None           | 2     | -1        |
| Fasting plasma glucose (mmol/L)            | None           | 2     | 1         |
| Indoor air pollution (all fuel types)      | None           | 2     | 1         |
| Outdoor air pollution (PM <sub>2.5</sub> ) | None           | 2     | 1         |
| Healthcare access and quality index        | None           | 2     | -1        |
| Lag distributed income per capita (I\$)    | Log            | 3     | -1        |
| Socio-demographic Index                    | None           | 3     | 0         |
| Omega-3 (kcal/capita, adjusted)            | Log            | 3     | -1        |
| Fruits (kcal/capita, adjusted)             | None           | 3     | -1        |
| Vegetables (kcal/capita, adjusted)         | None           | 3     | -1        |
| Nuts and seeds (kcal/capita, adjusted)     | None           | 3     | -1        |
| Whole grains (kcal/capita, adjusted)       | None           | 3     | -1        |
| Pulses/legumes (kcal/capita, adjusted)     | None           | 3     | -1        |
| PUFA adjusted (percent)                    | None           | 3     | -1        |
| Alcohol (litres per capita)                | None           | 3     | 0         |

## Chronic Respiratory Diseases

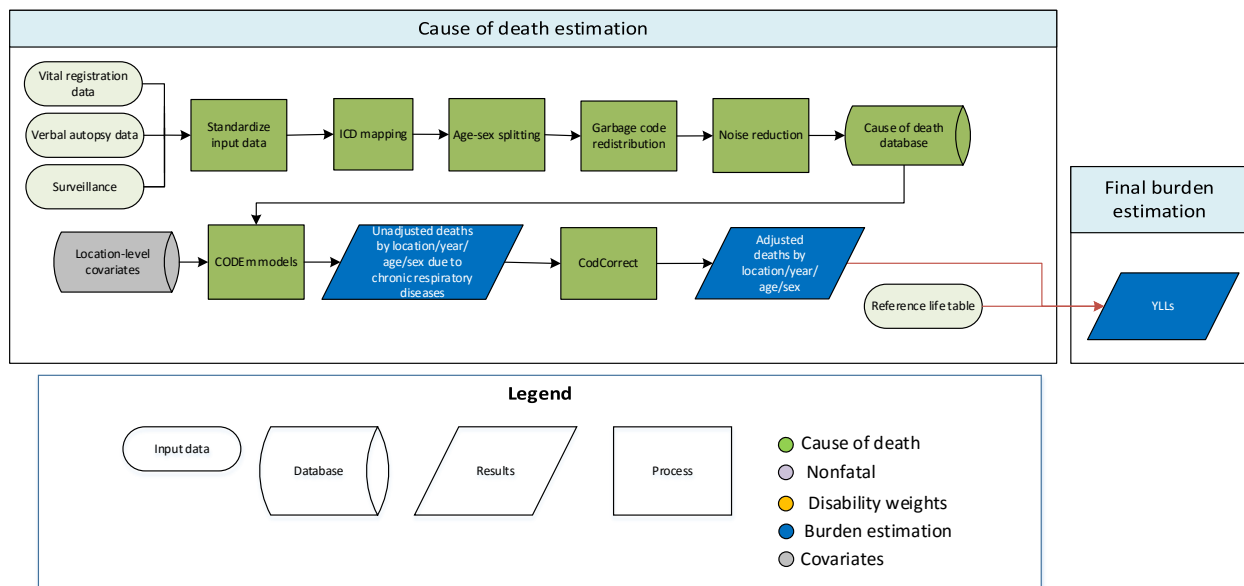

### Input data

Sources used to estimate chronic respiratory disease mortality included vital registration, verbal autopsy, and surveillance data from China. Our outlier criteria excluded data points that (1) were implausibly high or low, (2) substantially conflicted with established age or temporal patterns, or (3) significantly conflicted with other data sources conducted from the same locations or locations with similar characteristics (ie, Socio-demographic Index).

### Modelling strategy

The standard CODEm modelling approach was applied to estimate deaths due to chronic respiratory diseases. Chronic respiratory diseases served as the parent cause to chronic obstructive pulmonary disease, pneumoconiosis (including silicosis, asbestosis, coal worker’s pneumoconiosis, other pneumoconiosis), asthma, interstitial lung disease and pulmonary sarcoidosis, and other chronic respiratory diseases. Functionally, this means the death estimates for Chronic Respiratory Diseases serve as a “parent” envelope into which the “child” causes are squeezed by the CodCorrect algorithm. This approach allows us to use a broader range of data – specifically verbal autopsy data – which cannot be accurately mapped to specific respiratory diseases.

Separate models were conducted for male and female mortality, and the age range for both models was 0 to 95+ years. The same covariates from GBD 2015 were used, with the exception of indoor air pollution, which was changed from cooking-fuel-specific covariates to a generic all cooking fuel covariate.

| Level | Covariate                                                | Direction |
|-------|----------------------------------------------------------|-----------|
| 1     | log-transformed SEV scalar: chronic respiratory diseases | +         |

|   |                                                                |   |
|---|----------------------------------------------------------------|---|
|   | cumulative cigarettes (10 years)                               | + |
|   | cumulative cigarettes (5 years)                                | + |
|   | health care quality and access index                           | - |
| 2 | smoking prevalence                                             | + |
|   | indoor air pollution (all cooking fuels)                       | + |
|   | outdoor air pollution (PM <sub>2.5</sub> )                     | + |
|   | population above 1500m elevation (proportion)                  | + |
| 3 | log LDI (I\$ per capita)                                       | - |
|   | education (years per capita)                                   | - |
|   | Socio-demographic Index                                        | - |
|   | population between 500 and 1,500m elevation (proportion)       | + |
|   | population density over 1,000 people/square meter (proportion) | + |

Beyond changes in the underlying covariates, there were no substantial deviations from the GBD 2015 approach.



# Chronic Obstructive Pulmonary Disease

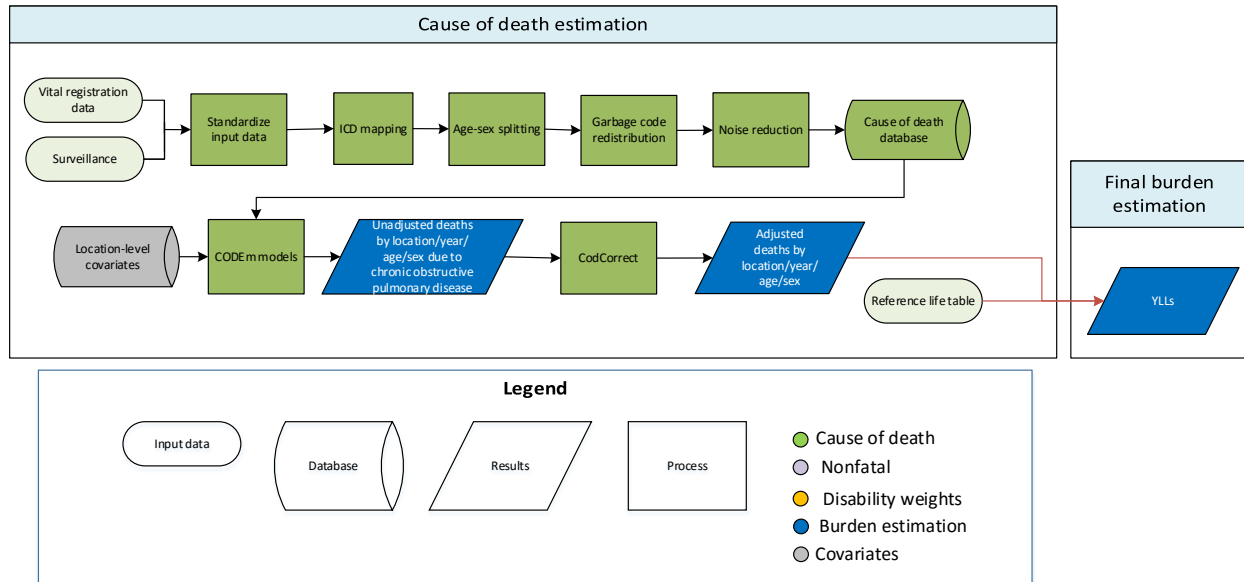

## Input data

Data used to estimate chronic obstructive pulmonary disease (COPD) mortality included vital registration and surveillance data from the cause of death (COD) database. Our outlier criteria excluded data points that (1) were implausibly high or low, (2) substantially conflicted with established age or temporal patterns, or (3) significantly conflicted with other data sources conducted from the same locations or locations with similar characteristics (ie, Socio-demographic Index).

## Modelling strategy

The standard CODEm modelling approach was applied to estimate deaths due to COPD. Separate models were conducted for male and female mortality, and the age range for both models was 1-95+ years. The mortality estimates from the COPD models were ultimately fit into the chronic respiratory diseases envelope.

The same covariates from GBD 2015 were used, with the exception of indoor air pollution, which was changed from cooking-fuel-specific covariates to a generic all cooking fuel covariate, and the health care access and quality index covariate, which was used in place of health systems access.

| Level | Covariate                          | Direction |
|-------|------------------------------------|-----------|
| 1     | log-transformed SEV scalar: COPD   | +         |
|       | cumulative cigarettes (10 years)   | +         |
|       | cumulative cigarettes (5 years)    | +         |
|       | elevation over 1,500m (proportion) | +         |

|   |                                            |   |
|---|--------------------------------------------|---|
| 2 | smoking prevalence                         | + |
|   | indoor air pollution (all cooking fuels)   | + |
|   | outdoor air pollution (PM <sub>2.5</sub> ) | + |
|   | health care access and quality index       | - |
| 3 | Socio-demographic Index                    | - |
|   | log LDI (I\$ per capita)                   | - |
|   | education (years per capita)               | - |

## Pneumoconiosis diseases: Silicosis, asbestosis, coal worker’s pneumoconiosis, and other pneumoconiosis

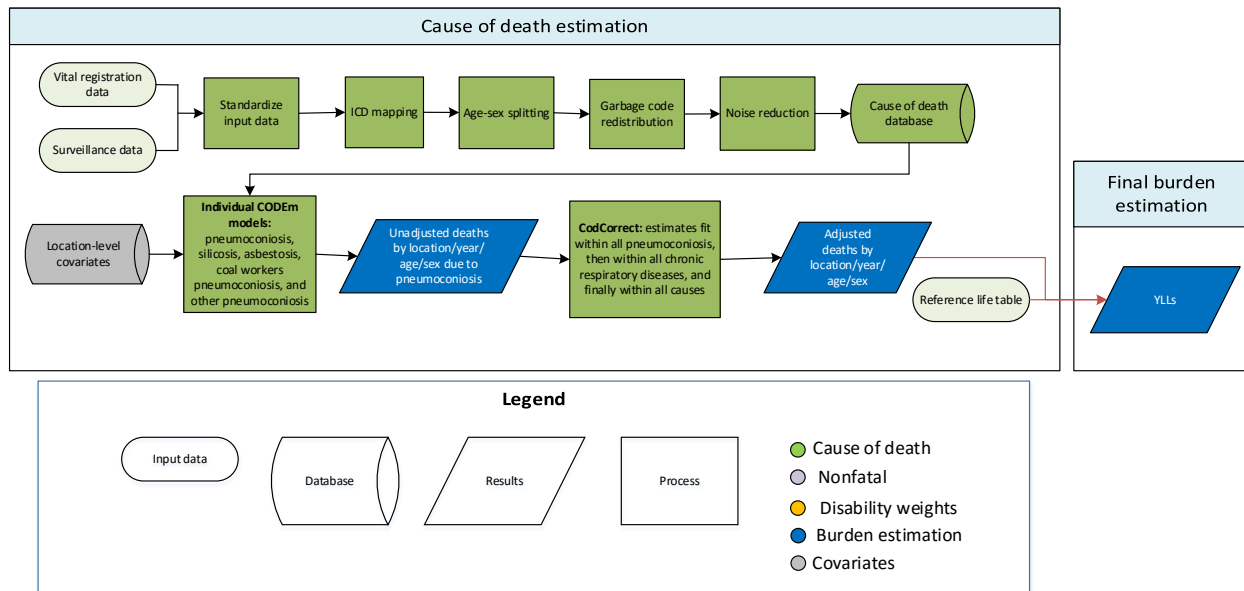

### Input data

Data used to estimate pneumoconiosis diseases mortality included vital registration and China mortality surveillance data from the cause of death (COD) database. Our outlier criteria excluded data points that (1) were implausibly high or low, (2) substantially conflicted with established age or temporal patterns, or (3) significantly conflicted with other data sources conducted from the same locations or locations with similar characteristics (i.e., socio-demographic index).

### Modelling strategy

The standard CODEm modelling approach was applied to estimate deaths due to pneumoconiosis diseases. Separate models were conducted for male and female mortality, and the age range for both models was 1–95+ years. The mortality estimates from pneumoconiosis disease models were ultimately fit into the chronic respiratory envelope, which is the parent cause for pneumoconiosis disease. The pneumoconiosis model serves as an envelope for silicosis, asbestosis, coal worker’s pneumoconiosis, and other pneumoconiosis. In CoDCorrect, estimates are first fit within all pneumoconiosis, then within all chronic respiratory disease, before being fit to the all-cause mortality envelope.

For the most part, the same covariates from GBD 2015 were used. Indoor air pollution was changed from cooking-fuel specific covariates to a generic all cooking fuel covariate. Adjustments were also made to the coal and asbestos covariates.

The coal production covariate was improved to include subnational data for the United States and India. United States state-level data for 2001-2015 came from the U.S. Energy Information Administration. India state-level data for 2005-2014 came from the Ministry of Coal in India. We scaled these figures to the national estimates from the BP Statistical Review of World Energy 2016. For years with missing

state-level data we split the national-level data according to the proportions by state in the closest year for which we did have state-level data.

We also created a covariate for asbestos consumption per capita with a 30-year lag, and used that instead of the GBD 2015 asbestos production covariate. This change is based on the idea that asbestos production may be too limited in scope, given that asbestosis may occur in locations where asbestos is used and handled but not necessarily mined. To create the asbestos consumption covariate we used data from the United States Geological Survey to run a model in DisMod 2.1. A 30-year lag was placed on this model to account for the delay between asbestos consumption and occurrence of disease.

The following table indicates covariates used in the pneumoconiosis models, their level, and direction:

| Level | Covariate                                  | Direction |
|-------|--------------------------------------------|-----------|
| 1     | log-transformed SEV scalar: pneumoconiosis | +         |
|       | asbestos consumption per capita*           | +         |
|       | coal production per capita*                | +         |
|       | gold production per capita*                | +         |
| 2     | smoking prevalence                         | +         |
|       | indoor air pollution (all cooking fuels)   | +         |
|       | cumulative cigarettes (5 years)            | +         |
|       | elevation over 1,500m (proportion)         | +         |
|       | elevation 500 to 1,500m (proportion)       | +         |
|       | health care access and quality index       | -         |
| 3     | log LDI (I\$ per capita)                   | -         |
|       | education (years per capita)               | -         |
|       | Socio-demographic Index                    | -         |

\* asbestos, coal, and gold covariates are each only used in a subset of the pneumoconiosis models, as follows: all three are included in the parent all pneumoconiosis model, asbestos consumption is included in the asbestosis model, coal production is included in the coal worker's pneumoconiosis model, and gold production is included in the silicosis model.

## Asthma

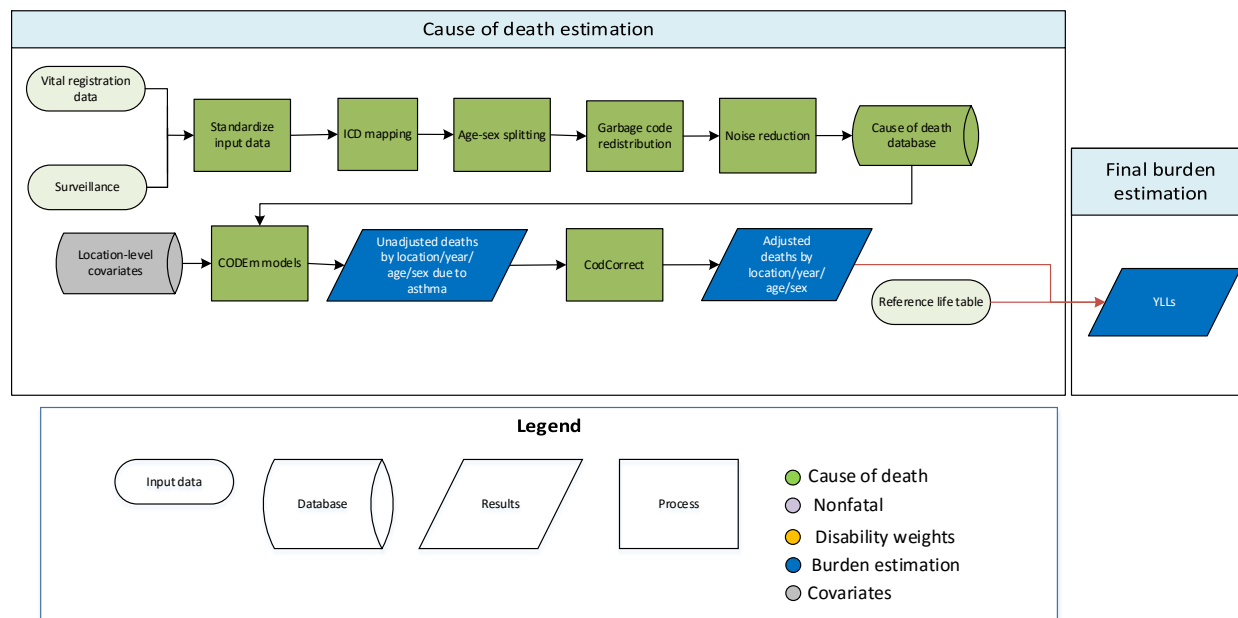

### Input data

Data used to estimate asthma mortality included vital registration and surveillance data from the cause of death (COD) database. Verbal autopsy data were not included and were instead mapped to the parent model (Chronic Respiratory Diseases). Our outlier criteria excluded data points that (1) were implausibly high or low relative to global or regional patterns, (2) substantially conflicted with established age or temporal patterns, or (3) significantly conflicted with other data sources conducted from the same locations or locations with similar characteristics (ie, Socio-demographic Index).

### Modelling strategy

The standard CODEm modelling approach was applied to estimate deaths due to asthma. Separate models were conducted for male and female mortality, and the age range for both models was 1–95+ years. The mortality estimates from the asthma models were ultimately fit into the chronic respiratory diseases envelope.

The same covariates from GBD 2015 were used, with the exception of indoor air pollution, which was changed from cooking-fuel-specific covariates to a generic all cooking fuel covariate.

| Level | Covariate                          | Direction |
|-------|------------------------------------|-----------|
| 1     | log-transformed SEV scalar: asthma | +         |
|       | cumulative cigarettes (10 years)   | +         |
|       | cumulative cigarettes (5 years)    | +         |

|   |                                            |   |
|---|--------------------------------------------|---|
|   | health care access and quality index       | - |
| 2 | smoking prevalence                         | + |
|   | indoor air pollution (all cooking fuels)   | + |
|   | outdoor air pollution (PM <sub>2.5</sub> ) | + |
| 3 | log LDI (I\$ per capita)                   | - |
|   | education (years per capita)               | - |
|   | Socio-demographic Index                    | - |

## Interstitial lung disease and pulmonary sarcoidosis

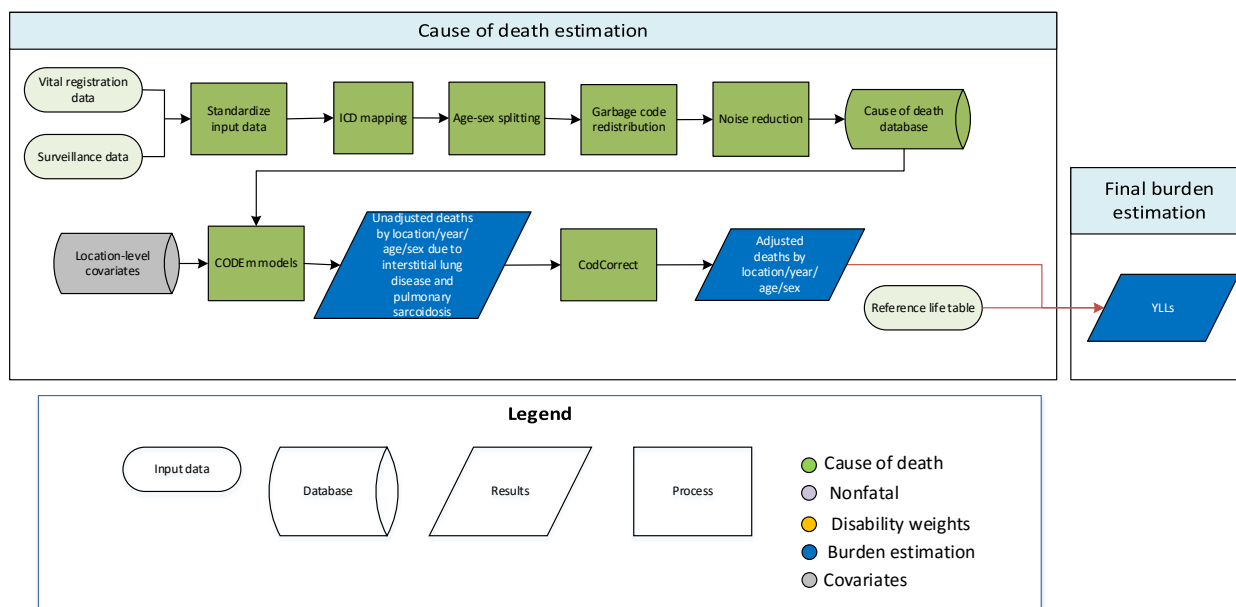

### Input data

Data used to estimate interstitial lung disease and pulmonary sarcoidosis mortality included vital registration and surveillance data from the cause of death (COD) database. Our outlier criteria excluded data points that (1) were implausibly high or low, (2) substantially conflicted with established age or temporal patterns, or (3) significantly conflicted with other data sources conducted from the same locations or locations with similar characteristics (ie, Socio-demographic Index).

### Modelling strategy

The standard CODEm modelling approach was applied to estimate deaths due to interstitial lung disease and pulmonary sarcoidosis. Separate models were conducted for male and female mortality, and the age range for both models was 1–95+ years. The mortality estimates from the interstitial lung disease and pulmonary sarcoidosis models were ultimately fit into the chronic respiratory envelope.

The same covariates from GBD 2015 were used, with the exception of indoor air pollution, which was changed from cooking-fuel-specific covariates to a generic all cooking fuel covariate.

| Level | Covariate                                             | Direction |
|-------|-------------------------------------------------------|-----------|
| 1     | log-transformed SEV scalar: interstitial lung disease | +         |
|       | smoking prevalence                                    | +         |
|       | cumulative cigarettes (5 years)                       | +         |
| 2     | elevation over 1,500m (proportion)                    | +         |

|   |                                                     |   |
|---|-----------------------------------------------------|---|
|   | elevation between 500 and 1,500m (proportion)       | + |
|   | population density over 1,000 ppl/sqkm (proportion) | + |
|   | indoor air pollution (all cooking fuels)            | + |
|   | outdoor air pollution (PM <sub>2.5</sub> )          | + |
|   | health care access and quality index                | - |
| 3 | log LDI (I\$ per capita)                            | - |
|   | education (years per capita)                        | - |
|   | Socio-demographic Index                             | - |



## Other chronic respiratory diseases

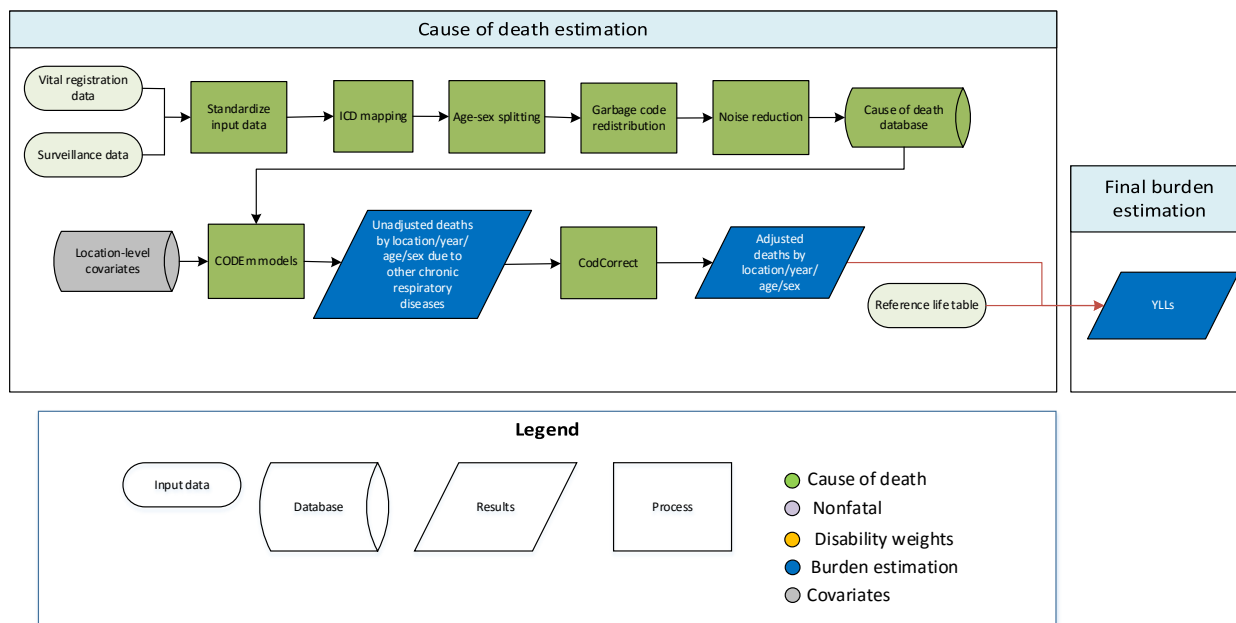

### Input data

Data used to estimate other chronic respiratory diseases included vital registration and surveillance data from the cause of death (COD) database. Our outlier criteria excluded data points that (1) were implausibly high or low, (2) substantially conflicted with established age or temporal patterns, or (3) significantly conflicted with other data sources conducted from the same locations or locations with similar characteristics (ie, Socio-demographic Index).

### Modelling strategy

The standard CODEm modelling approach was applied to estimate deaths due to other chronic respiratory diseases. Separate models were conducted for male and female mortality, and the age range for both models was 0 days to 95+ years. Like other respiratory causes, the mortality estimates from other chronic respiratory diseases were ultimately fit into the chronic respiratory envelope.

The same covariates from GBD 2015 were used, with the exception of indoor air pollution, which was changed from cooking-fuel-specific covariates to a generic all cooking fuel covariate.

| Level | Covariate                                                      | Direction |
|-------|----------------------------------------------------------------|-----------|
| 1     | log-transformed SEV scalar: other chronic respiratory diseases | +         |
|       | smoking prevalence                                             | +         |
|       | cumulative cigarettes (5 years)                                | +         |
|       | indoor air pollution (all cooking fuels)                       | +         |

|   |                                                     |   |
|---|-----------------------------------------------------|---|
|   | outdoor air pollution (PM <sub>2.5</sub> )          | + |
| 2 | elevation over 1,500m (proportion)                  | + |
|   | elevation between 500 and 1,500m (proportion)       | + |
|   | population density over 1,000 ppl/sqkm (proportion) | + |
|   | health care access and quality index                | - |
| 3 | log LDI (I\$ per capita)                            | - |
|   | education (years per capita)                        | - |
|   | Socio-demographic Index                             | - |

## Cirrhosis

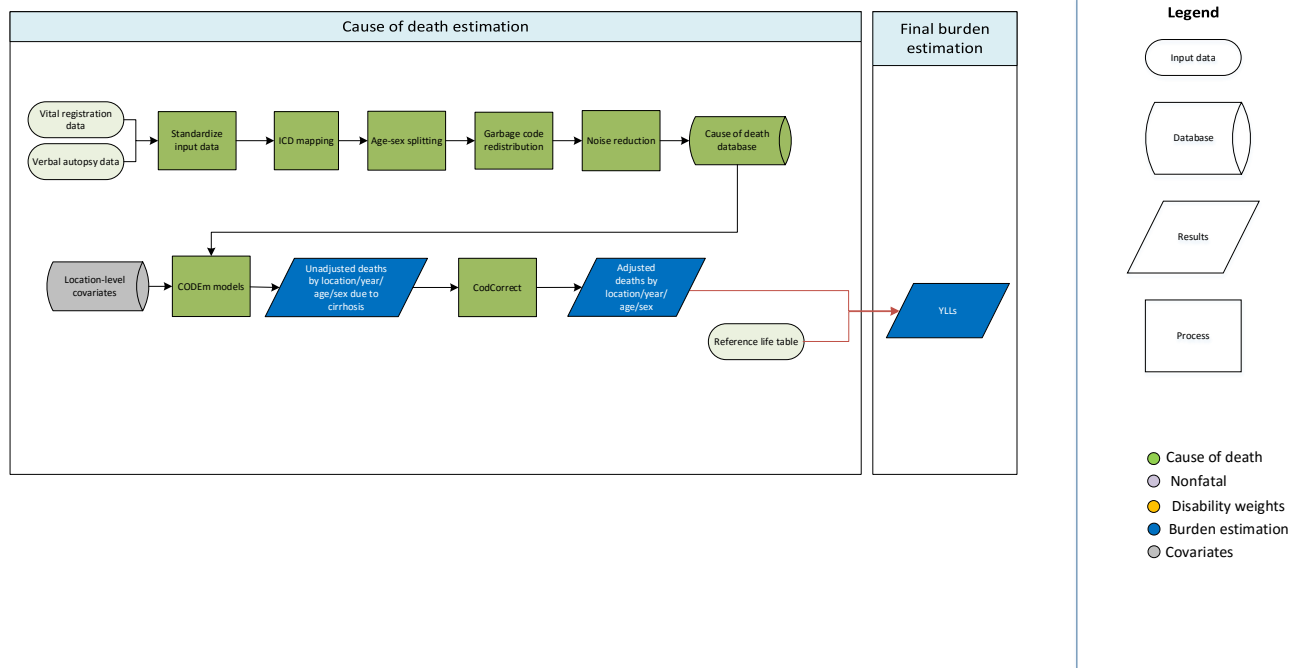

### Input data

We modelled cirrhosis mortality using vital registration and verbal autopsy data in the cause of death database. We outliered data in instances where garbage code redistribution and noise reduction, in combination with small sample sizes, resulted in unreasonable cause fractions; and data that violated well-established time or age trends.

### Modelling strategy

We modelled deaths due to cirrhosis with a standard CODEm model using the cause of death database and location-level covariates as inputs. We hybridized separate global and data-rich models to acquire unadjusted results, which we finalized and adjusted using CodCorrect to reach final YLLs due to cirrhosis.

There were no substantive changes in the modelling strategy for cirrhosis from GBD 2015 to GBD 2016.

| Covariate                               | Level | Direction |
|-----------------------------------------|-------|-----------|
| Alcohol (liters per capita)             | 1     | 1         |
| Diabetes prevalence (age standardized)  | 2     | 1         |
| Education (years per capita)            | 3     | -1        |
| Health system access 2                  | 3     | -1        |
| Log LDI (I\$ per capita)                | 3     | -1        |
| Mean body mass index                    | 2     | 1         |
| Schistosomiasis prevalence (proportion) | 1     | 1         |
| Socio-demographic Index                 | 3     | 0         |
| Hepatitis B prevalence                  | 1     | 1         |
| Hepatitis C prevalence                  | 1     | 1         |
| Healthcare access and quality index     | 2     | -1        |

## Cirrhosis by aetiology

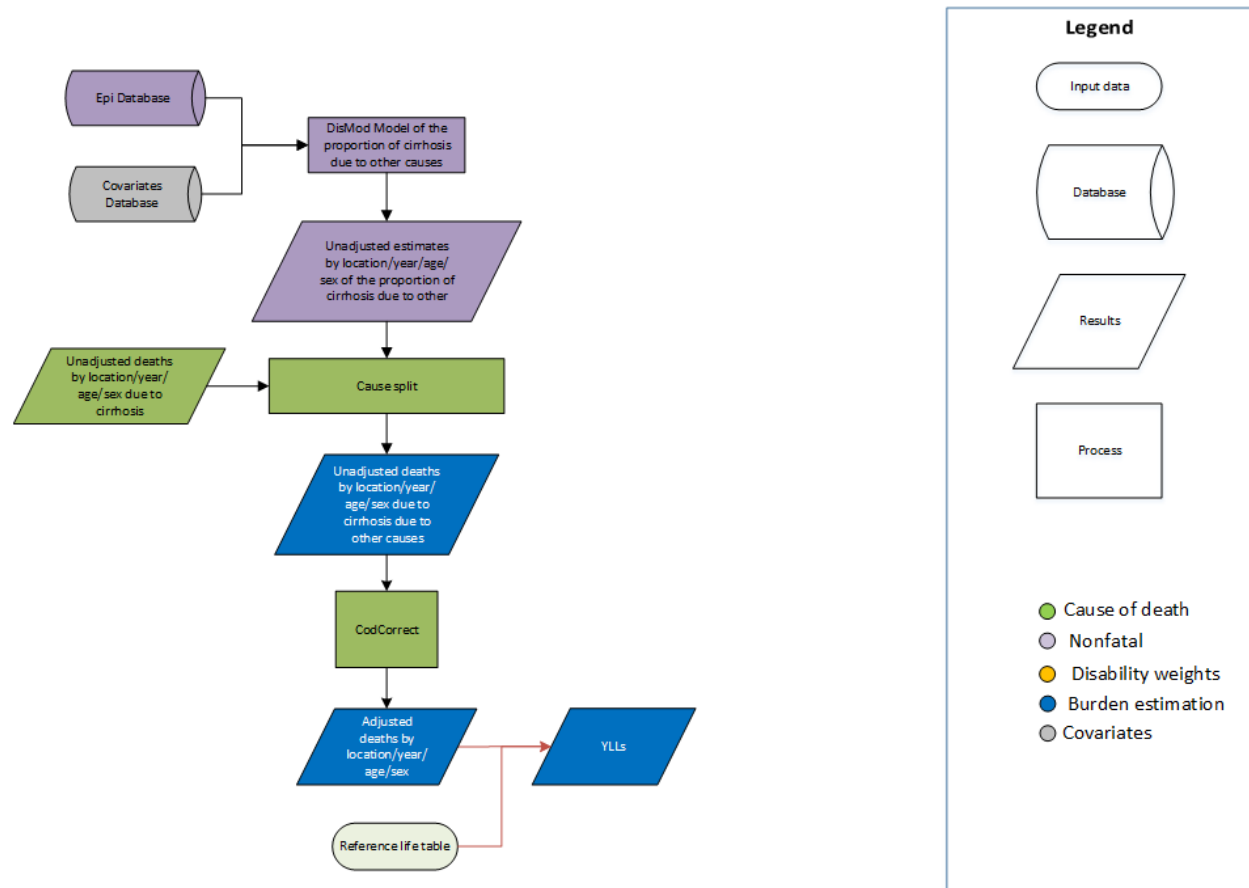

### Input data

We conducted a literature review for studies reporting aetiologies of cirrhosis patients.

### Modelling strategy

We first modelled all cirrhosis mortality using all available data in the cause of death database and a hybrid CODEm model. To estimate mortality from cirrhosis due to alcohol, cirrhosis due to hepatitis B, cirrhosis due to hepatitis C, and cirrhosis due to other causes, we developed aetiological proportion models using DisMod and used the results of these models to split the parent cirrhosis mortality estimates.

Given the similar aetiologies for liver cancer and cirrhosis we integrated the aetiology models for these two causes. We have more data for liver cancer aetiologies than we do for cirrhosis. Therefore, we first developed four single-parameter DisMod models, each to estimate the proportion of liver cancer due to a given cause (ie, alcohol, hepatitis B, hepatitis C, and other). These models included as covariates alcohol consumption (litres per capita), hepatitis B surface antigen (HBsAg) seroprevalence, and hepatitis C (anti-HCV IgG) seroprevalence. Moreover, the model for the proportion due to alcohol

included a covariate for the percentage of alcohol abstainers. Estimates from these liver cancer models were then used as covariates (along with alcohol, HBsAg, and anti-HCV) in all of the corresponding cirrhosis aetiology. Estimates from these cirrhosis models were then similarly used as covariates in the corresponding liver cancer models. Proportions from the four etiology models were then rescaled to sum to 1 at the draw level, and used to split the parent cirrhosis mortality estimates.

There were no substantive changes in the modelling strategy for cirrhosis from GBD 2015 to GBD 2016.

## Digestive Diseases

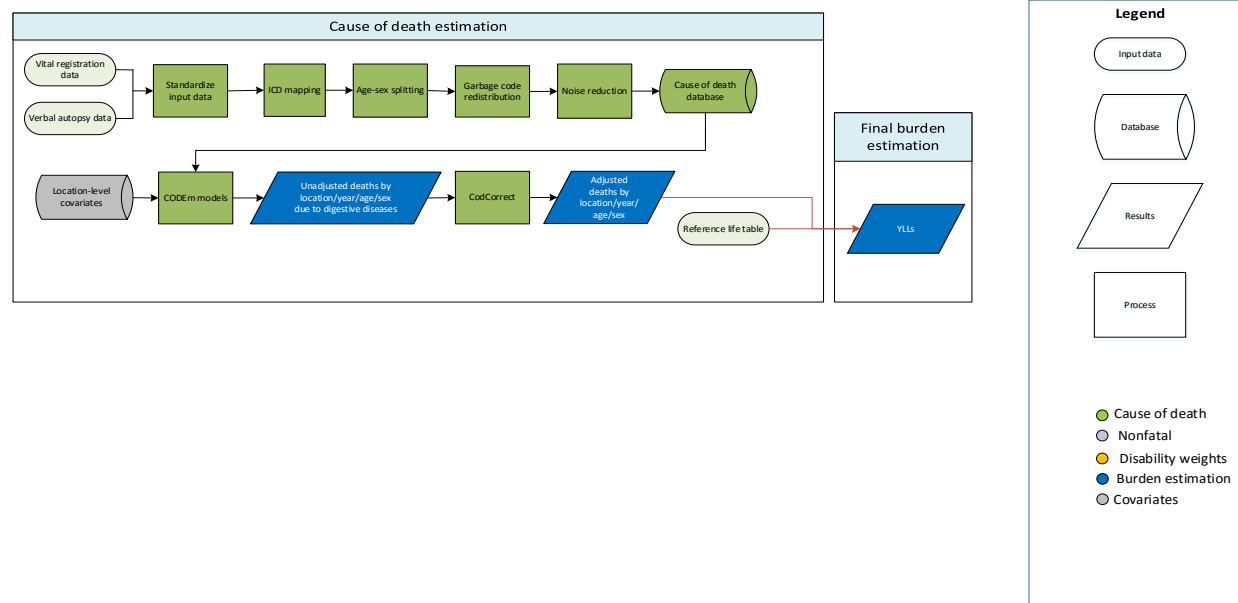

### Input data

Data used to estimate mortality of digestive diseases consisted of vital registration data and verbal autopsy data from the cause of death (COD) database. We outliered data in instances where garbage code redistribution and noise reduction, in combination with small sample sizes, resulted in unreasonable cause fractions; and data that violated well-established time or age trends. Outliering methods were consistent across both vital registration and verbal autopsy data. The data in digestive diseases consists of aggregated data from all other specific digestive diseases, as well as unique data points from unspecified codes of digestive disease.

### Modelling strategy

We modelled deaths due to all digestive diseases with a standard CODEm model using the cause of death database and location-level covariates as inputs. The model followed standard parameters. We hybridized separate global and data-rich models to acquire unadjusted results, which we finalized and adjusted using CoDCorrect to reach final years of life lost (YLLs) due to digestive diseases. In GBD 2016 we added the healthcare access and quality index (HAQI) covariate to the model.

| Covariate                               | Level | Direction |
|-----------------------------------------|-------|-----------|
| Alcohol (liters per capita)             | 1     | 1         |
| Cumulative cigarettes (10 years)        | 1     | 1         |
| Education (years per capita)            | 3     | -1        |
| Lag distributed income (per capita)     | 3     | -1        |
| Underweight (proportion weight for age) | 2     | 1         |
| Sanitation (proportion with access)     | 1     | -1        |
| Sociodemographic index                  | 3     | -1        |
| Fruits (grams adjusted)                 | 2     | -1        |
| Red meats (grams adjusted)              | 2     | 1         |
| Health access and quality index         | 2     | -1        |

## Peptic ulcer disease

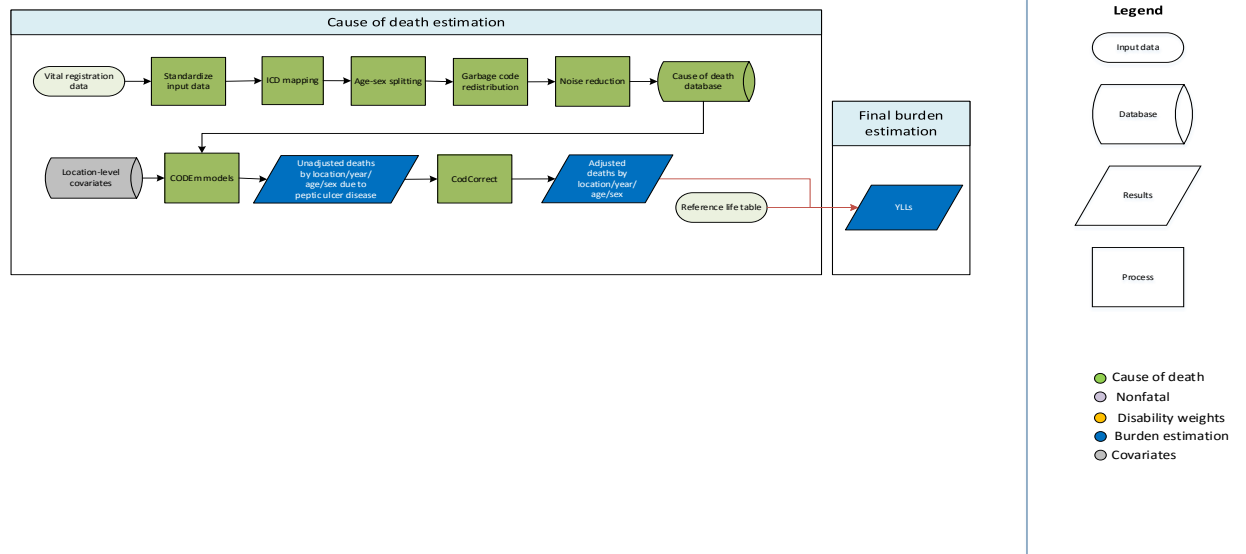

### Input data

Data used to estimate mortality of peptic ulcer disease consisted of vital registration data from the cause of death (COD) database. We outliered data in instances where garbage code redistribution and noise reduction, in combination with small sample sizes, resulted in unreasonable cause fractions, and data that violated well-established time or age trends.

### Modelling strategy

We modelled deaths due to peptic ulcer disease with a standard CODEm model using the cause of death database and location-level covariates as inputs. The model followed standard parameters, with the exception that the start age of the model was 1 year old instead of 0. We hybridized separate global and data-rich models to acquire unadjusted results, which we finalized and adjusted using CodCorrect to reach final years of life lost (YLLs) due to peptic ulcer disease. The covariate changes from GBD 2015 to GBD 2016 include changing the directionality of vegetables adjusted (grams per person availability) from -1 to 0, the addition of the summary exposure variable unsafe water, and the addition of the healthcare access and quality index (HAQI) covariate.

| Covariate                                      | Level | Direction |
|------------------------------------------------|-------|-----------|
| Alcohol (liters per capita)                    | 1     | 1         |
| Cumulative cigarettes (10 years)               | 1     | 1         |
| Cumulative cigarettes (5 years)                | 1     | 1         |
| Lag distributed income (per capita)            | 3     | -1        |
| Sanitation (proportion with access)            | 2     | -1        |
| Smoking (prevalence)                           | 1     | 1         |
| Maternal education (years per capita)          | 3     | -1        |
| Improved water source (proportion with access) | 2     | 1         |
| Sociodemographic index                         | 3     | -1        |
| Vegetables (grams adjusted)                    | 2     | 0         |
| Health access and quality index                | 2     | -1        |

## Gastritis and duodenitis

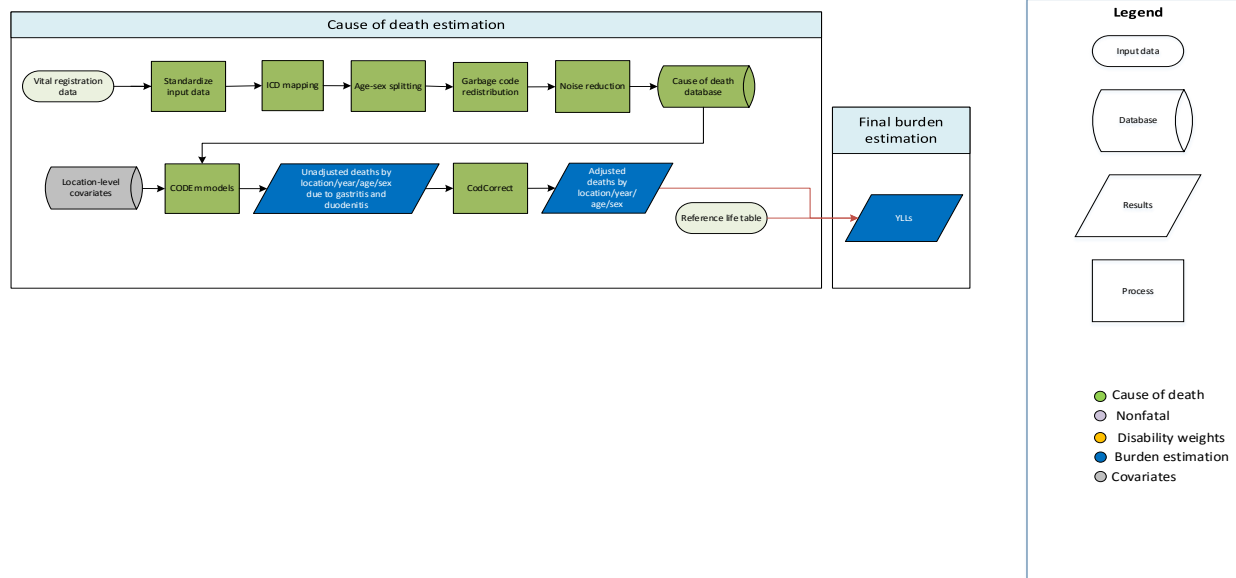

### Input data

Vital registration data were used to model this cause. We outliered data in instances where garbage code redistribution and noise reduction, in combination with small sample sizes, resulted in unreasonable cause fractions, and data that violated well-established time or age trends.

### Modelling strategy

We modelled deaths due to gastritis and duodenitis with a standard CODEm model using the cause of death database and location-level covariates as inputs. The model followed standard parameters, with the exception that the start age of the model was 1 year old instead of 0 and the linear floor rate was lowered to 0.001 in order to better capture low data. We hybridized separate global and data-rich models to acquire unadjusted results, which we finalized and adjusted using CodCorrect to reach final years of life lost (YLLs) due to gastritis and duodenitis. The covariate changes from GBD 2015 to GBD 2016 include a replacement of the covariate “improved water source” (proportion with access) to the summary exposure variable “unsafe water”, and the addition of the healthcare access and quality index (HAQI) covariate.

| Covariate                                | Level | Direction |
|------------------------------------------|-------|-----------|
| Alcohol (liters per capita)              | 1     | 1         |
| Cumulative cigarettes (10 years)         | 1     | 1         |
| Cumulative cigarettes (5 years)          | 1     | 1         |
| Education (years per capita)             | 3     | -1        |
| Lag distributed income (per capita)      | 3     | -1        |
| Sanitation (proportion with access)      | 2     | -1        |
| Smoking prevalence                       | 1     | 1         |
| Unsafe water (summary exposure variable) | 2     | 1         |
| Sociodemographic index                   | 3     | -1        |
| Vegetables (grams adjusted)              | 2     | 0         |
| Health access and quality index          | 2     | -1        |



## Appendicitis

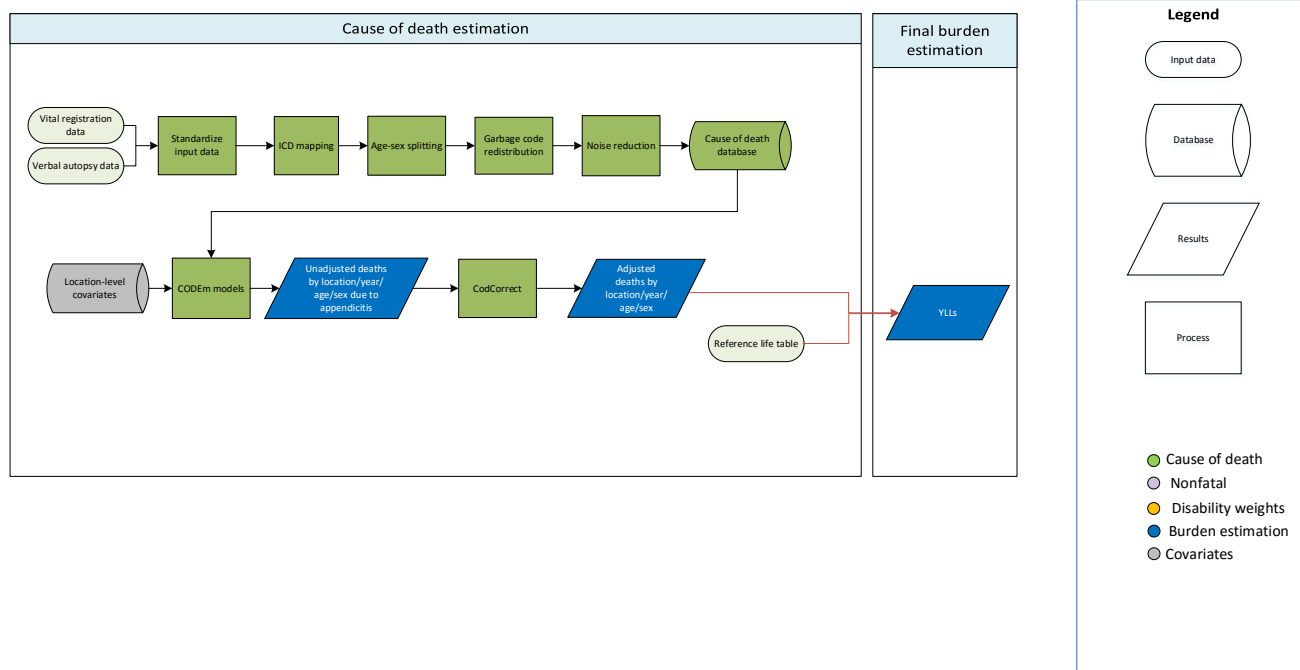

### Input data

Data used to estimate appendicitis mortality consisted of vital registration and verbal autopsy data from the cause of death (COD) database. We outliered data in instances where garbage code redistribution and noise reduction, in combination with small sample sizes, resulted in unreasonable cause fractions; and data that violated well-established time or age trends.

### Modelling strategy

We modelled deaths due to appendicitis with a standard CODEm model using the cause of death database and location-level covariates as inputs. The model followed standard parameters, with the exception that the start age of the model was 1 year old instead of 0 and the linear floor rate was lowered to 0.0001 in order to better capture low data. We hybridized separate global and data-rich models to acquire unadjusted results, which we finalized and adjusted using CodCorrect to reach final YLLs due to appendicitis.

There were no significant changes in the modelling process between GBD 2015 and GBD 2016.

| Covariate                           | Level | Direction |
|-------------------------------------|-------|-----------|
| Education (years per capita)        | 3     | -1        |
| Log LDI (I\$ per capita)            | 3     | -1        |
| Health system access (capped)       | 3     | -1        |
| Socio-demographic Index             | 3     | -1        |
| Fruits adjusted (g)                 | 2     | -1        |
| Vegetables adjusted (g)             | 2     | -1        |
| Healthcare access and quality index | 2     | -1        |

## Paralytic Ileus and Intestinal Obstruction

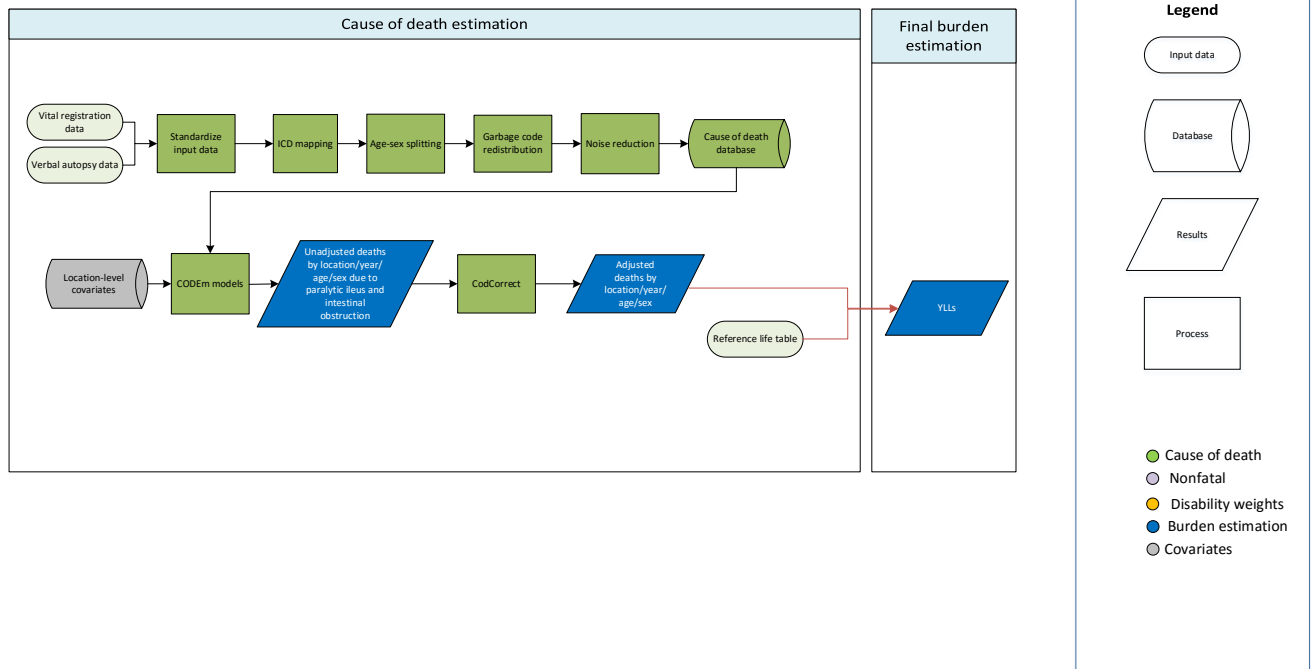

### Input data

Data used to estimate cellulitis mortality consisted of vital registration and verbal autopsy data from the cause of death (COD) database. We outliered all VA data in children under the age of 1 because it is not possible to accurately diagnose paralytic ileus or intestinal obstruction in this age group; and data that violated well-established time or age trends; and data in instances where garbage code redistribution and noise reduction, in combination with small sample sizes, resulted in unreasonable cause fractions.

### Modelling strategy

We modelled deaths due to paralytic ileus and intestinal obstruction with a standard CODEm model using the cause of death database and location-level covariates as inputs. The model followed standard parameters, with the exception that the linear floor rate was lowered to 0.0001 in order to better capture low data. We hybridized separate global and data-rich models to acquire unadjusted results, which we finalized and adjusted using CodCorrect to reach final YLLs due to paralytic ileus and intestinal obstruction.

There were no significant changes in the modelling process between GBD 2015 and GBD 2016.

| Covariate                           | Level | Direction |
|-------------------------------------|-------|-----------|
| Education (years per capita)        | 3     | -1        |
| Log LDI (I\$ per capita)            | 3     | -1        |
| Health system access (capped)       | 3     | -1        |
| Socio-demographic Index             | 3     | -1        |
| Fruits adjusted (g)                 | 2     | -1        |
| Vegetables adjusted (g)             | 2     | -1        |
| Healthcare access and quality index | 2     | -1        |

## Vascular Intestinal Disorders

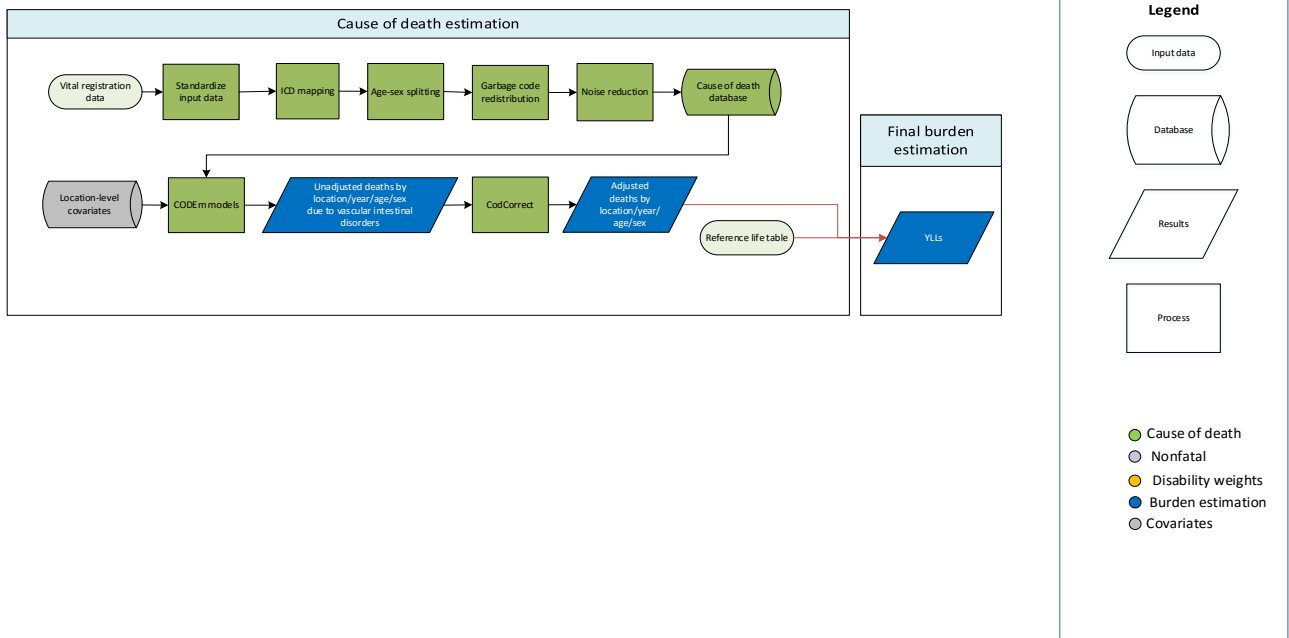

### Input data

Vital registration data were used to model this cause. We outliered data in instances where garbage code redistribution and noise reduction, in combination with small sample sizes, resulted in unreasonable cause fractions; and data that violated well-established time or age trends.

### Modeling strategy

We modeled deaths due to vascular intestinal disorders with a standard CODEm model using the cause of death database and location-level covariates as inputs. The model followed standard parameters, with the exception that the start age of the model was 1 year old instead of 0 and the linear floor rate was lowered to 0.0001 in order to better capture low data. We hybridized separate global and data-rich models to acquire unadjusted results, which we finalized and adjusted using CodCorrect to reach final YLLs due to vascular intestinal disorders. In GBD 2016, we replaced the animal fats (kcal per capita) covariate with the updated saturated fats (adjusted percentage of total calories available) covariate.

## Inguinal, Femoral, and Abdominal Hernias

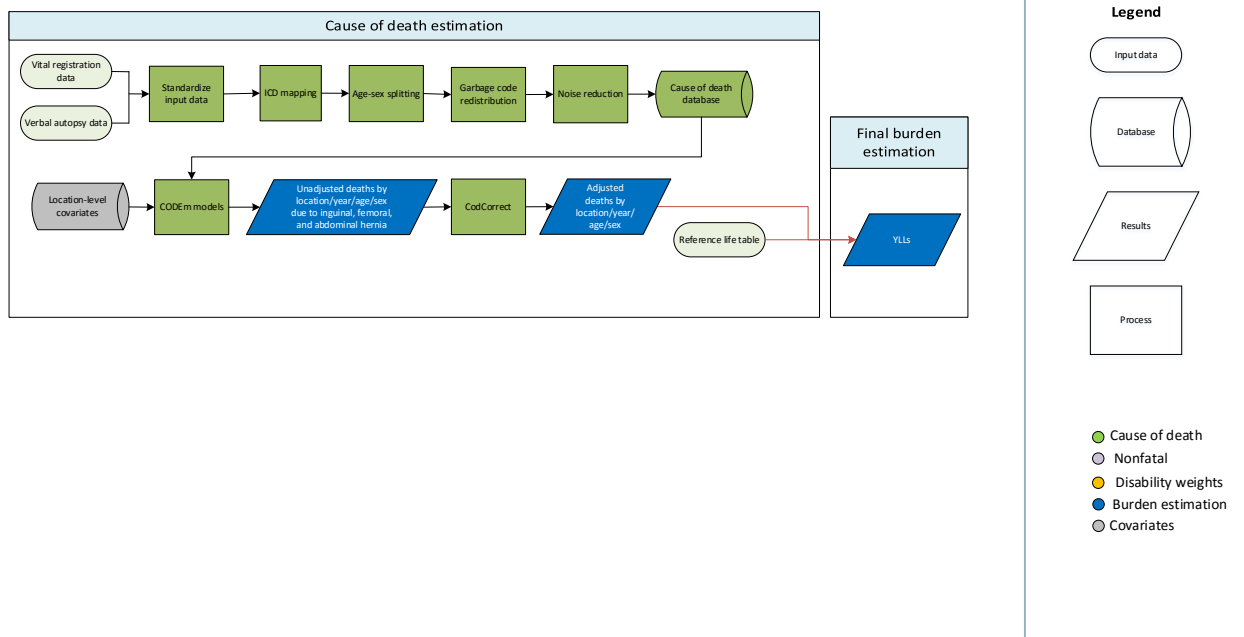

### Input data

Vital registration and verbal autopsy data were used to model this cause. We outliered data in instances where garbage code redistribution and noise reduction, in combination with small sample sizes, resulted in unreasonable cause fractions; and data that violated well-established time or age trends. Outliering methods were consistent across both vital registration and verbal autopsy data.

### Modelling strategy

We modelled deaths due to inguinal, femoral, and abdominal hernias with a standard CODEm model using the cause of death database and location-level covariates as inputs. The model followed standard parameters, with the exception that the start age of the model was 1 year old instead of 0 and the linear floor rate was lowered to 0.0001 in order to better capture low data. We hybridized separate global and data-rich models to acquire unadjusted results, which we finalized and adjusted using CodCorrect to reach final years of life lost (YLLs) due to inguinal, femoral, and abdominal hernias. In GBD 2016 we added the healthcare access and quality index (HAQI) covariate to the model.

| Covariate                           | Level | Direction |
|-------------------------------------|-------|-----------|
| Education (years per capita)        | 3     | -1        |
| Lag distributed income (per capita) | 3     | -1        |
| Sociodemographic index              | 3     | 0         |
| Health access and quality index     | 2     | -1        |

# Inflammatory Bowel Disease

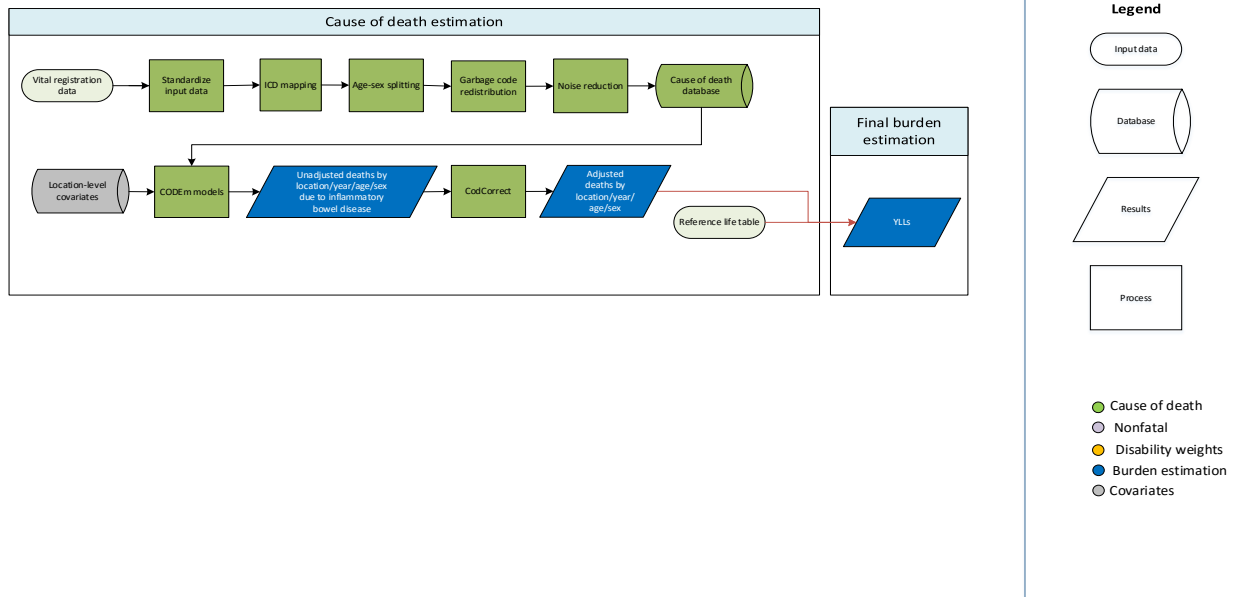

## Input data

Vital registration data were used to model this cause. We outliered data in instances where garbage code redistribution and noise reduction, in combination with small sample sizes, resulted in unreasonable cause fractions, and data that violated well-established time or age trends.

## Modelling strategy

We modelled deaths due to inflammatory bowel disease with a standard CODEm model using the cause of death database and location-level covariates as inputs. The model followed standard parameters, with the exception that the start age of the model was 1 year old instead of 0 and the linear floor rate was lowered to 0.0001 in order to better capture low data. We hybridized separate global and data-rich models to acquire unadjusted results, which we finalized and adjusted using CodCorrect to reach final years of life lost (YLLs) due to inflammatory bowel disease. In GBD 2016 we added the healthcare access and quality index (HAQI) covariate and replaced the animal fats (kcal per capita) with an updated saturated fats (adjusted percent) covariate.

| Covariate                           | Level | Direction |
|-------------------------------------|-------|-----------|
| Education (years per capita)        | 3     | -1        |
| Lag distributed income (per capita) | 3     | 0         |
| Latitude 15 to 30 (proportion)      | 2     | -1        |
| Latitude 30 to 45 (proportion)      | 2     | 1         |
| Latitude 45 plus (proportion)       | 2     | 1         |
| Sociodemographic index              | 3     | 0         |
| Fruits (grams adjusted)             | 1     | -1        |
| Red meats (grams adjusted)          | 1     | 1         |
| Saturated fats (adjusted percent)   | 1     | 1         |
| Vegetables (grams adjusted)         | -1    | -1        |
| Health access and quality index     | -1    | -1        |

## Vascular Intestinal Disorders

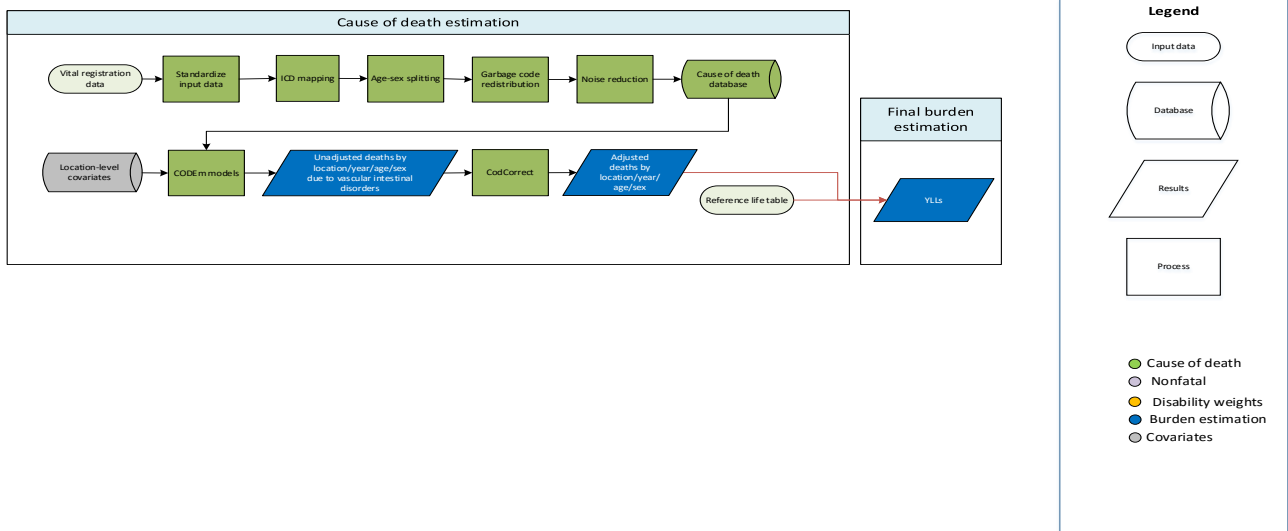

### Input data

Vital registration data were used to model this cause. We outliered data in instances where garbage code redistribution and noise reduction, in combination with small sample sizes, resulted in unreasonable cause fractions; and data that violated well-established time or age trends.

### Modelling strategy

We modelled deaths due to vascular intestinal disorders with a standard CODEm model using the cause of death database and location-level covariates as inputs. The model followed standard parameters, with the exception that the start age of the model was 1 year old instead of 0 and the linear floor rate was lowered to 0.0001 in order to better capture low data. We hybridized separate global and data-rich models to acquire unadjusted results, which we finalized and adjusted using CodCorrect to reach final years of life lost (YLLs) due to vascular intestinal disorders. In GBD 2016 we added the healthcare access and quality index (HAQI) covariate and replaced the animal fats (kcal per capita) covariate with an updated saturated fats (adjusted percent).

| Covariate                                     | Level | Direction |
|-----------------------------------------------|-------|-----------|
| Alcohol (liters per capita)                   | 2     | 1         |
| Diabetes fasting plasma glucose (mmol/L)      | 1     | 1         |
| Diabetes age specific prevalence (proportion) | 1     | 1         |
| Education (years per capita)                  | 3     | -1        |
| Lag distributed income (per capita)           | 3     | -1        |
| Cholesterol (mean)                            | 1     | 1         |
| Systolic blood pressure (mean)                | 1     | 1         |
| Latitude over 45 (proportion)                 | 3     | 1         |
| Sociodemographic index                        | 3     | 0         |
| Fruits (grams adjusted)                       | 2     | -1        |
| Saturated fats (adjusted percent)             | 1     | 1         |
| Vegetables (grams adjusted)                   | 2     | -1        |
| Health access and quality index               | 2     | -1        |

## Gallbladder and biliary diseases

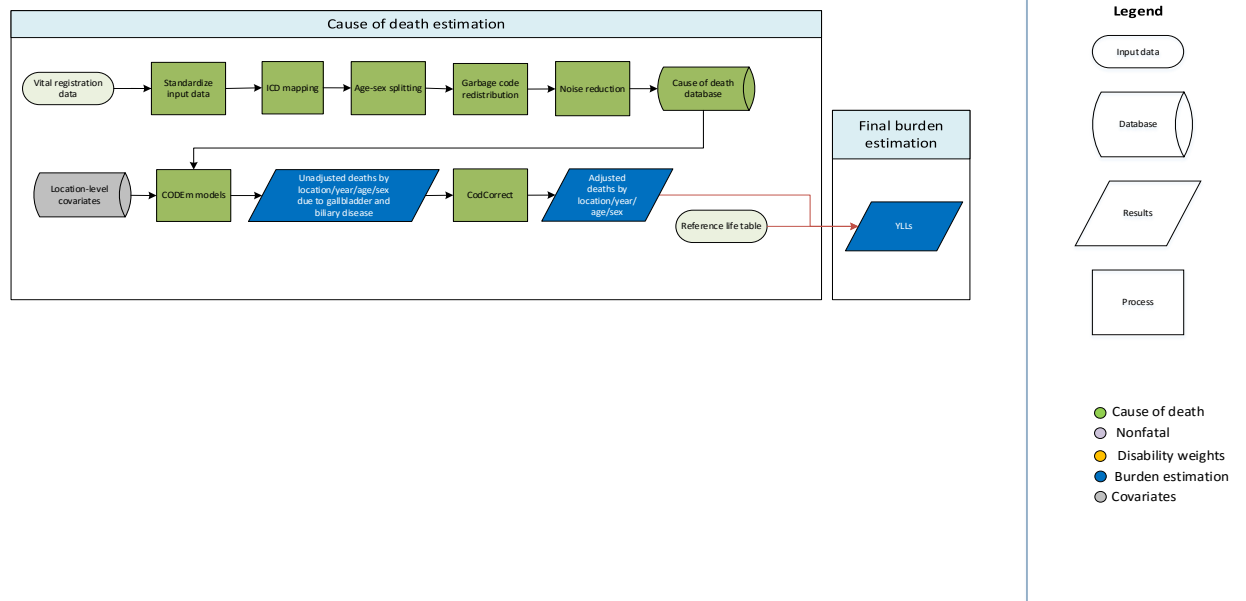

### Input data

Data used to estimate mortality of gallbladder and biliary diseases consisted of vital registration data from the cause of death (COD) database. We outliered data in instances where garbage code redistribution and noise reduction, in combination with small sample sizes, resulted in unreasonable cause fractions; and data that violated well-established time or age trends.

### Modelling strategy

We modelled deaths due to gallbladder and biliary diseases with a standard CODEm model using the cause of death database and location-level covariates as inputs. The model followed standard parameters, with the exception that the start age of the model was 1 year old instead of 0 and the linear floor rate was lowered to 0.0001 in order to better capture low data. We hybridized separate global and data-rich models to acquire unadjusted results, which we finalized and adjusted using CodCorrect to reach final years of life lost (YLLs) due to gallbladder and biliary diseases. In GBD 2016 we added the healthcare access and quality index (HAQI) covariate and replaced the animal fats (kcal per capita) covariate with an updated saturated fats (adjusted percent).

| Covariate                           | Level | Direction |
|-------------------------------------|-------|-----------|
| Alcohol (liters per capita)         | 2     | 1         |
| Education (years per capita)        | 3     | 0         |
| Lag distributed income (per capita) | 3     | 0         |
| Body mass index (mean)              | 1     | 1         |
| Population over 65 (proportion)     | 2     | 1         |
| Sociodemographic index              | 3     | 0         |
| Red meats (grams adjusted)          | 2     | 1         |
| Saturated fats (adjusted percent)   | 1     | 1         |
| Health access and quality index     | 2     | -1        |

## Pancreatitis

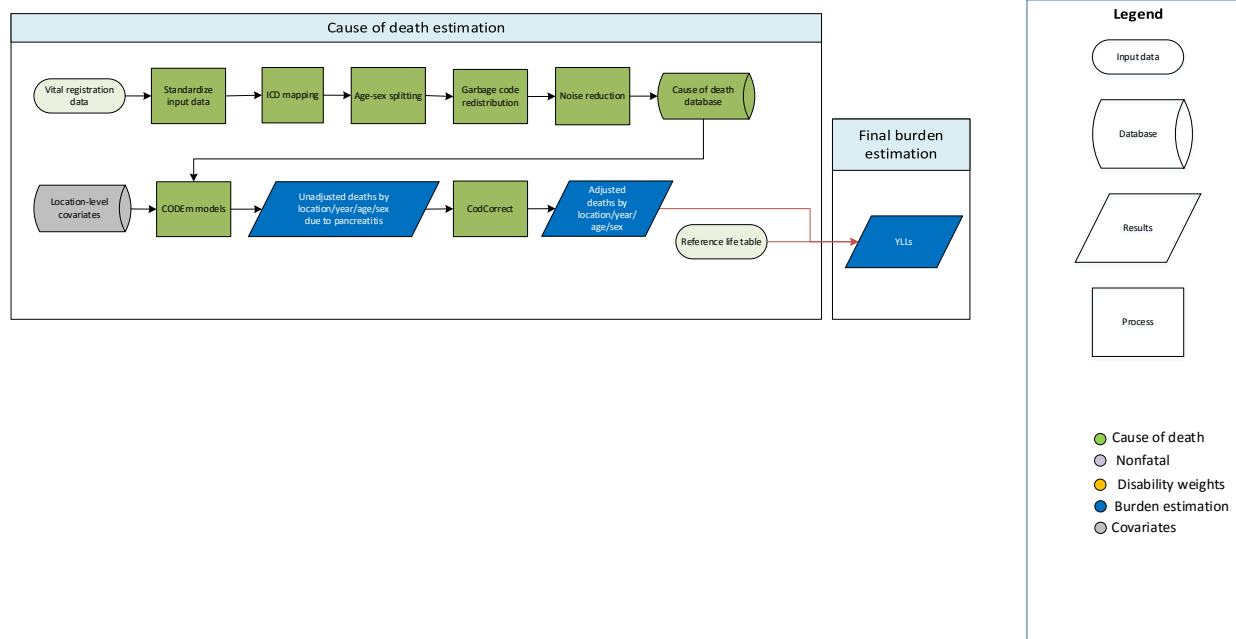

### Input data

Vital registration data were used to model this cause. We outliered data in instances where garbage code redistribution and noise reduction, in combination with small sample sizes, resulted in unreasonable cause fractions, and data that violated well-established time or age trends.

### Modelling strategy

We modelled deaths due to pancreatitis with a standard CODEm model using the cause of death database and location-level covariates as inputs. The model followed standard parameters, with the exception that the start age of the model was 1-year-old instead of 0 and the linear floor rate was lowered to 0.0001 in order to better capture low data. We hybridized separate global and data-rich models to acquire unadjusted results, which we finalized and adjusted using CodCorrect to reach final YLLs due to pancreatitis. In GBD 2016 we added the healthcare access and quality index (HAQI) covariate to the model.

| Covariate                                       | Level | Direction |
|-------------------------------------------------|-------|-----------|
| Alcohol (liters per capita)                     | 1     | 1         |
| Education (years per capita)                    | 3     | -1        |
| Lag distributed income (per capita)             | 3     | 0         |
| Body mass index (mean)                          | 2     | 1         |
| Pancreatitis scalar (summary exposure variable) | 1     | 1         |
| Sociodemographic index                          | 3     | 0         |
| Health access and quality index                 | 2     | -1        |



## Other digestive diseases

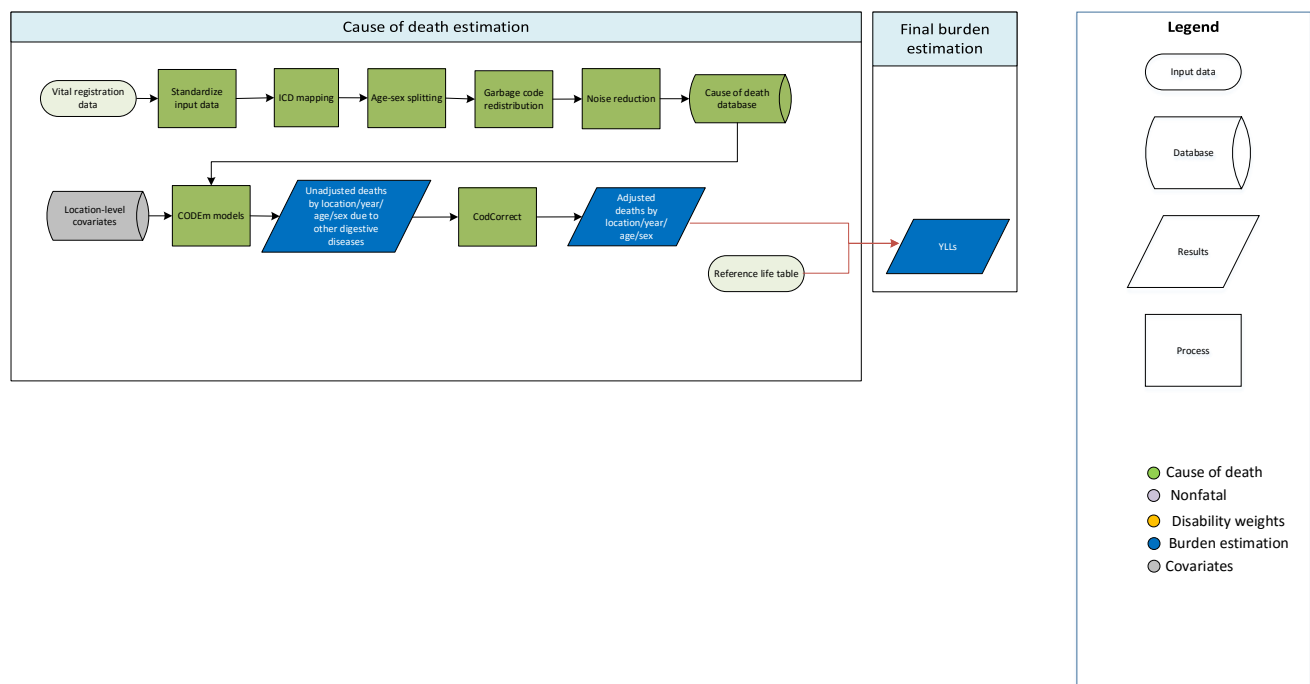

### Input data

Data used to estimate mortality due to other digestive diseases consisted of vital registration data from the cause of death (COD) database. We outliered data in instances where garbage code redistribution and noise reduction, in combination with small sample sizes, resulted in unreasonable cause fractions; and data that violated well-established time or age trends.

### Modelling strategy

We modelled deaths due to other digestive diseases with a standard CODEm model using the cause of death database and location-level covariates as inputs. The model followed standard parameters, with the exception that the start age of the model was 1 year old instead of 0. We hybridized separate global and data-rich models to acquire unadjusted results, which we finalized and adjusted using CodCorrect to reach final YLLs due to other digestive diseases.

There were no significant changes in the modelling process between GBD 2015 and GBD 2016.

| Covariate                                         | Level | Direction |
|---------------------------------------------------|-------|-----------|
| Alcohol (litres per capita)                       | 1     | 1         |
| Cumulative cigarettes (5 years)                   | 1     | 1         |
| Cumulative cigarettes (10 years)                  | 1     | 1         |
| Diabetes age-standardized prevalence (proportion) | 2     | 1         |
| Education (years per capita)                      | 3     | -1        |
| Health system access 2                            | 3     | -1        |
| Log LDI (I\$ per capita)                          | 3     | -1        |
| Mean BMI                                          | 2     | 1         |
| Sanitation (proportion with access)               | 2     | -1        |
| Smoking prevalence                                | 1     | 1         |

|                                                |   |    |
|------------------------------------------------|---|----|
| Improved water source (proportion with access) | 2 | -1 |
| Socio-demographic Index                        | 3 | 0  |
| Fruits adjusted (g)                            | 2 | -1 |
| Red meats adjusted (g)                         | 2 | 1  |
| Saturated fats adjusted (percentage)           | 2 | 1  |
| Vegetables adjusted (g)                        | 2 | 0  |
| Healthcare access and quality index            | 2 | -1 |

---

## Alzheimer’s Disease and Other Dementias

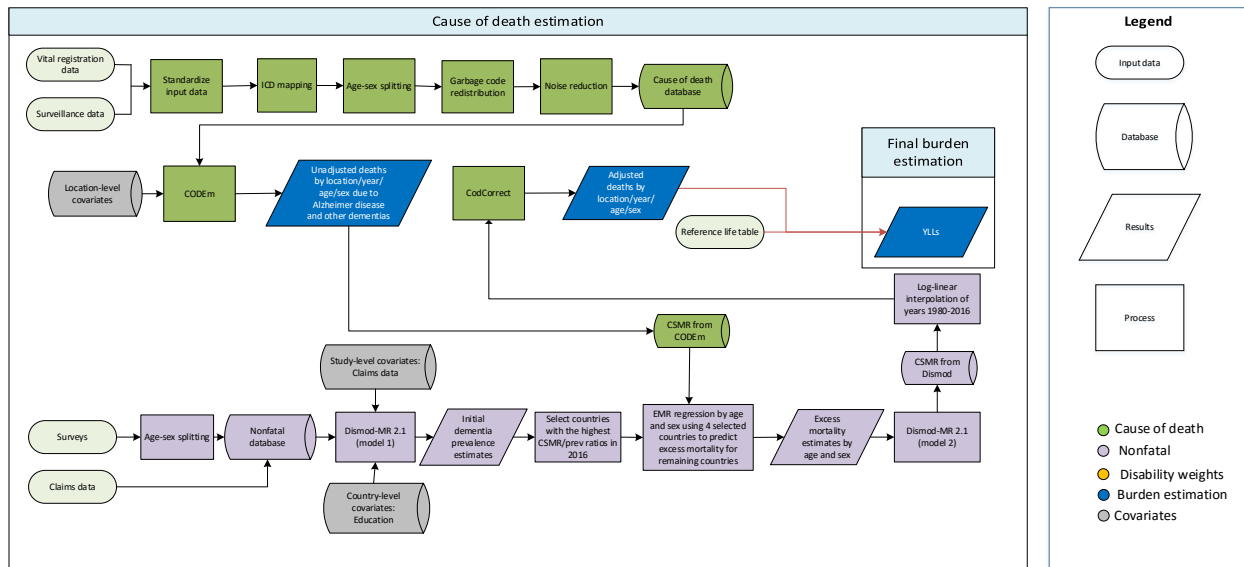

### Input Data

In GBD 2016, data used to estimate deaths due to Alzheimer’s disease and other dementias (dementias hereafter) included mortality data from vital registration systems and prevalence data from surveys and medical claims sources.

An updated systematic review was conducted from January 2015 to October 2016, and search terms<sup>1</sup> were set to capture studies for all dementia, including its sub-types. The search yielded 1,208 initial hits and 27 were marked for extraction. Inclusion criteria comprised studies that reported prevalence, incidence, remission rate, excess mortality rate, relative risk of mortality, standardized mortality ratio, or with-condition mortality rate. Studies with non-representative samples or no clearly defined sample were excluded. A flow chart documenting this review is displayed below.

<sup>1</sup> ((dementia[Title/Abstract]) AND ((incidence[Title/Abstract]) or (prevalence[Title/Abstract])) AND ("2015/01/23"[Date - Publication] : "3000"[Date - Publication])

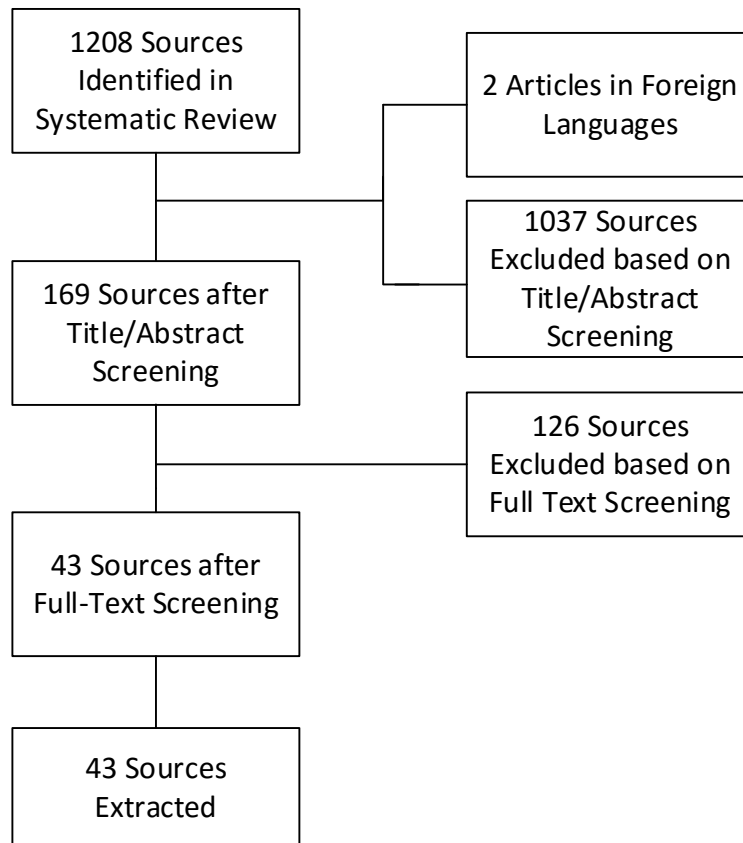

## Modelling Strategy

### Overview

Dementia mortality rates have increased more than five-fold since 1980 in high-quality vital registration systems such as in the US and Scandinavia. We have not seen an equivalent increase in prevalence and incidence data sources. If at all, there has been a modest decline in incidence and prevalence of dementia in studies in the UK and the US.<sup>2,3</sup> Also, the greater than 20-fold variation in mortality rates of dementia between countries is much greater than the four-fold difference in prevalence and incidence between countries. As it is unlikely that case fatality from dementia has dramatically increased over the time period and that it would differ by a very large margin between countries, the hypothesis is that certifying and coding practices have changed over time and at a different pace between countries. To avoid spurious large trends over time in the fatal component of the burden of dementia, we decided for GBD 2013 to make dementia mortality rates consistent with the most recent rates relative to prevalence of countries that are most likely to certify or code dementia as an underlying cause of death. This approach was applied again for GBD 2016, described further below.

<sup>2</sup> Akushevich I, Kravchenko J, Ukraintseva S, Arbeev K, Yashin AI. Time trends of incidence of age-associated diseases in the US elderly population: Medicare-based analysis. *Age and ageing*. 2013 Jul 1;42(4):494-500.

<sup>3</sup> Matthews FE, Arthur A, Barnes LE, Bond J, Jagger C, Robinson L, Brayne C, Medical Research Council Cognitive Function and Ageing Collaboration. A two-decade comparison of prevalence of dementia in individuals aged 65 years and older from three geographical areas of England: results of the Cognitive Function and Ageing Study I and II. *The Lancet*. 2013 Nov 1;382(9902):1405-12.

## Modelling steps

First, we ran a CODEm model for dementia and extracted the mortality rates by age, sex, and geography for 2016. The covariates used in this model are displayed below.

| Level | Covariate                                      | Direction |
|-------|------------------------------------------------|-----------|
| 1     | Diabetes age-specific proportion               | +         |
|       | Mean BMI                                       | +         |
|       | Cholesterol (total, mean per capita)           | +         |
|       | Systolic blood pressure (mmHg)                 | +         |
| 2     | Animal fats (kcal per capita)                  | +         |
|       | Latitude Over 45 (proportion)                  | +         |
|       | Red meat consumption adjusted (g)              | +         |
|       | Healthcare access and quality index            | -         |
| 3     | Education (years per capita)                   | -         |
|       | LDI per capita(I\$ per capita)                 | 0         |
|       | Sanitation (proportion with access             | -         |
|       | Improved water source (proportion with access) | -         |

Second, we ran a DisMod-MR 2.1 model with all data on incidence, prevalence, and mortality risk (RR, SMR, or with-condition mortality rates) and a setting of zero remission and extracted 2016 prevalence by age, sex, and geography. To account for potential systematic differences between US medical claims and survey data, we crosswalked for each year of claims data.

Third, we selected countries where the sum of cause-specific mortality rate to prevalence ratio for males and females exceeded 0.4 (excluding small island nations and those without vital registration). This resulted in choosing the United States, Sweden, Finland and Puerto Rico. The choice to pick fewer countries for this regression compared to GBD 2015, which used 30 countries in the EMR regression, was motivated by a desire to reduce the spread in EMR values, as countries used in the regression retain their original EMR values.

Fourth, we used a linear effects regression with dummies on age group and sex to predict excess mortality (ie, the ratio of cause-specific mortality rate and prevalence) by age and sex, the results of which are found in the tables below.

**Table: Fixed effect coefficients of EMR regression. Outcome: ln(EMR)**

| Independent variables | Coef   | Std. error | P value | 95% Confidence Interval |        |
|-----------------------|--------|------------|---------|-------------------------|--------|
| Male                  | 0.331  | 0.056      | 0.000   | 0.222                   | 0.440  |
| Age 40-59             | -3.34  | 0.118      | 0.000   | -3.571                  | -3.109 |
| Age 60-64             | -2.693 | 0.118      | 0.000   | -2.924                  | -2.462 |
| Age 65-69             | -2.448 | 0.118      | 0.000   | -2.679                  | -2.217 |
| Age 70-74             | -2.113 | 0.118      | 0.000   | -2.344                  | -1.882 |
| Age 75- 80            | -1.738 | 0.118      | 0.000   | -1.969                  | -1.507 |
| Age 80-84             | -1.385 | 0.118      | 0.000   | -1.616                  | -1.154 |
| Age 85-89             | -0.974 | 0.118      | 0.000   | -1.205                  | -0.743 |
| Age 90-94             | -0.457 | 0.118      | 0.000   | -0.688                  | -0.226 |
| Constant              | -1.802 | 0.088      | 0.000   | -1.974                  | -1.630 |

**Table: Predicted EMR values by age and sex (95% CI)**

|            | Male                  | Female                |
|------------|-----------------------|-----------------------|
| Age 40-59  | 0.008 (0.007 - 0.01)  | 0.006 (0.005 - 0.007) |
| Age 60-64  | 0.016 (0.013 - 0.019) | 0.011 (0.009 - 0.013) |
| Age 65-69  | 0.02 (0.017 - 0.024)  | 0.014 (0.012 - 0.017) |
| Age 70-74  | 0.028 (0.024 - 0.033) | 0.02 (0.017 - 0.024)  |
| Age 75- 80 | 0.04 (0.034 - 0.048)  | 0.029 (0.025 - 0.034) |
| Age 80-84  | 0.057 (0.048 - 0.068) | 0.042 (0.035 - 0.048) |
| Age 85-89  | 0.087 (0.074 - 0.104) | 0.063 (0.053 - 0.074) |
| Age 90-94  | 0.146 (0.123 - 0.173) | 0.104 (0.088 - 0.123) |
| Age 95+    | 0.23 (0.193 - 0.274)  | 0.166 (0.14 - 0.196)  |

Fifth, these estimates were added to a second DisMod-MR 2.1 model as pertaining to the full 1990–2016 estimation period. For the four countries included in the regression, we retained their age- and sex-specific ratios and entered those also as pertaining to the full 1990–2016 estimation period. Age-standardized years of education was used as a country-level covariate. We excluded data for standardized mortality ratio, with-condition mortality rate, and relative risk as we wanted to estimate cause-specific mortality rates that were consistent with the level of excess mortality from the four chosen countries in 2016.

Sixth, we took the predictions of cause-specific mortality by age, sex, geography, and year that DisMod-MR 2.1 calculated as being consistent with the data on incidence, prevalence, and the priors on excess mortality from step five.

Seventh, because DisMod-MR 2.1 produces estimates in five-year intervals only, we expanded the time series by log-linear interpolation. Values for 1980-1990 were generated using a regression on the entire time series with Socio-demographic index included as a predictor.

Lastly, before adding the dementia mortality estimates into CodCorrect, we proportionately retrieved the difference in deaths between those estimated in CODEm and those estimated in step 7 from a set of ‘target causes’ which were identified as causes of death in cohort studies of persons with dementia. The

target causes included lower respiratory infections, protein-energy malnutrition, other nutritional deficiencies, cerebrovascular disease, interstitial nephritis and urinary tract infections, decubitus ulcer, and pulmonary aspiration and foreign body in airway.<sup>4 5 6 7</sup> More information on this process is located in section 4 of the appendix.

---

<sup>4</sup> Brunnström HR, Englund EM. Cause of death in patients with dementia disorders. *European journal of neurology*. 2009 Apr 1;16(4):488-92.

<sup>5</sup> Thomas BM, Starr JM, Whalley LJ. Death certification in treated cases of presenile Alzheimer's disease and vascular dementia in Scotland. *Age and Ageing*. 1997 Sep 1;26(5):401-6.

<sup>6</sup> Todd S, Barr S, Roberts M, Passmore AP. Survival in dementia and predictors of mortality: a review. *International journal of geriatric psychiatry*. 2013 Nov 1;28(11):1109-24.

<sup>7</sup> Keene J, Hope T, Fairburn CG, Jacoby R. Death and dementia. *International journal of geriatric psychiatry*. 2001 Oct 1;16(10):969-74.

## Parkinson Disease

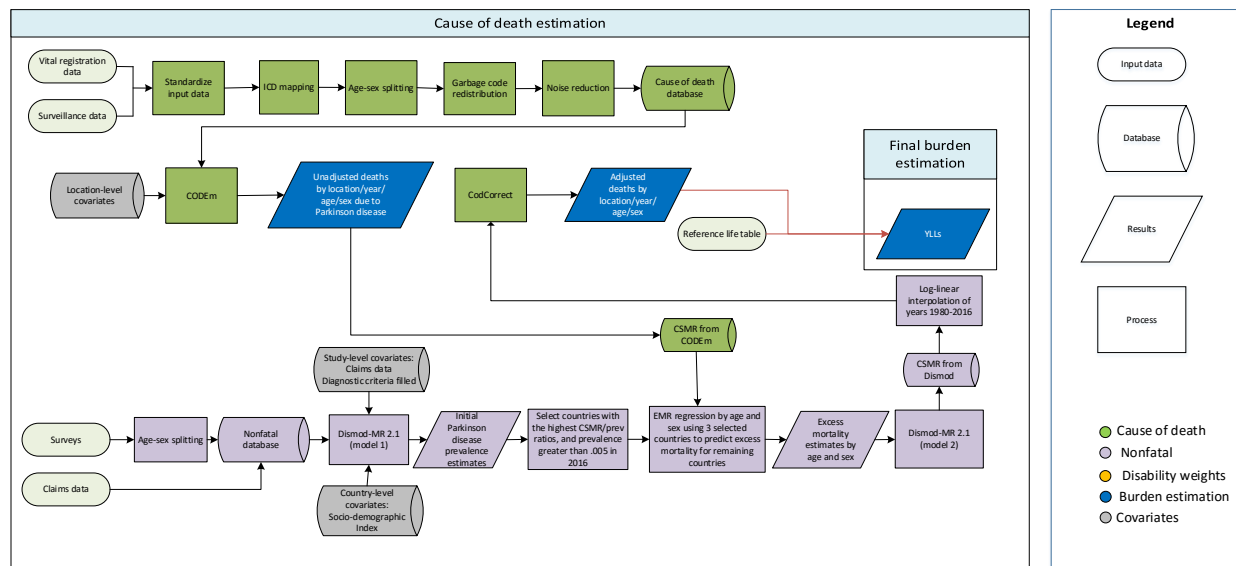

### Input Data

In GBD 2016, data used to estimate deaths due to Parkinson disease included mortality data from vital registration systems and prevalence data from surveys and claims sources.

An updated systematic review was conducted from January 2011 to December 2015, and search terms<sup>1</sup> were set to capture studies for Parkinson disease. The search yielded 1,433 initial hits and 17 were marked for extraction. Inclusion criteria comprised studies that reported prevalence, incidence, remission rate, excess mortality rate, relative risk of mortality, standardized mortality ratio, or with-condition mortality rate. Studies with no clearly defined sample or that drew from specific clinic/patient organizations were excluded.

### Modelling Strategy

#### Overview

Parkinson's disease mortality rates have more than doubled since 1980 in high-quality vital registration systems such as in the US, Canada, Australia, France, Germany, the United Kingdom and Finland, while other European countries like the Netherlands, Sweden, and Norway have not seen such increases over time. We have not seen an equivalent increase in prevalence and incidence data sources. Additionally, the greater than 15-fold variation in mortality rates of Parkinson disease between countries is much greater the three-fold difference in prevalence and incidence between high-income countries. As it is unlikely that case fatality from Parkinson disease has dramatically increased over the time period and that it would differ by a very large margin between countries, the hypothesis is that certifying and coding practices have changed over time and at a different pace between countries. Therefore, for GBD 2016 we decided to employ a modelling strategy which we have previously used to model mortality

<sup>1</sup> (((((Parkinson disease AND epidemiology) AND ( "2011/01/01"[PDat] : "2015/12/31"[PDat] ))) AND ((Parkinson disease AND epidemiology))))



from Alzheimer disease and other dementias. This modelling process avoids spurious large trends over time in the fatal component of the burden of dementia by making dementia mortality rates consistent with the rates observed in 2016 relative to prevalence in countries that are most likely to certify or code Parkinson disease as an underlying cause of death.

#### Modelling steps

First, we ran a CODEm model for Parkinson disease and extracted the mortality rates by age, sex, and geography for 2016.

Second, we ran a DisMod-MR 2.1 model with all data on incidence, prevalence, and mortality risk (RR, SMR, or with-condition mortality rates) and a setting of zero remission and extracted 2016 prevalence by age, sex, and geography. To account for potential systematic differences between claims and survey data, we crosswalked for each year of claims data.

Third, we selected the three countries (United States, Finland, and Austria) with the highest cause-specific mortality rate (from step 1) to prevalence (from step 2) ratio in 2016, which also had an age-standardised prevalence rate greater than 0.0005, and a population greater than 1 million.

Fourth, we used a linear effects regression with dummies on age group and sex to predict excess mortality (i.e., the ratio of cause-specific mortality rate and prevalence) by age and sex, the results of which are found in the tables below.

**Table:** Fixed effect coefficients of EMR regression. Outcome: ln(EMR)

| Independent variables | Coef   | Std. error | P value | 95% Confidence Interval |        |
|-----------------------|--------|------------|---------|-------------------------|--------|
| Male                  | 0.214  | 0.074      | 0.006   | 0.069                   | 0.359  |
| Age 40-59             | -3.522 | 0.157      | 0.000   | -3.829                  | -3.214 |
| Age 60-64             | -2.716 | 0.157      | 0.000   | -3.024                  | -2.409 |
| Age 65-69             | -2.236 | 0.157      | 0.000   | -2.544                  | -1.929 |
| Age 70-74             | -1.686 | 0.157      | 0.000   | -1.993                  | -1.378 |
| Age 75- 80            | -1.194 | 0.157      | 0.000   | -1.502                  | -0.887 |
| Age 80-84             | -0.779 | 0.157      | 0.000   | -1.087                  | -0.471 |
| Age 85-89             | -0.493 | 0.157      | 0.003   | -0.800                  | -0.185 |
| Age 90-94             | -0.203 | 0.157      | 0.202   | -0.511                  | 0.104  |
| Constant              | -2.097 | 0.117      | 0.000   | -2.326                  | -1.867 |

**Table:** Predicted EMR values by age and sex (95% CI)

|            | Male                  | Female                |
|------------|-----------------------|-----------------------|
| Age 40-59  | 0.005 (0.004 - 0.006) | 0.004 (0.003 - 0.005) |
| Age 60-64  | 0.01 (0.008 - 0.013)  | 0.008 (0.006 - 0.01)  |
| Age 65-69  | 0.016 (0.013 - 0.02)  | 0.013 (0.01 - 0.016)  |
| Age 70-74  | 0.028 (0.023 - 0.035) | 0.023 (0.018 - 0.029) |
| Age 75- 80 | 0.047 (0.037 - 0.059) | 0.037 (0.029 - 0.046) |
| Age 80-84  | 0.071 (0.055 - 0.089) | 0.057 (0.045 - 0.07)  |
| Age 85-89  | 0.093 (0.073 - 0.117) | 0.076 (0.06 - 0.093)  |
| Age 90-94  | 0.126 (0.099 - 0.155) | 0.101 (0.08 - 0.127)  |
| Age 95+    | 0.154 (0.122 - 0.191) | 0.123 (0.097 - 0.153) |

Fifth, these estimates were added to a second DisMod-MR 2.1 model as pertaining to the full 1990–2016 estimation period. For the three countries included in the regression, we retained their age- and sex-specific ratios and entered those also as pertaining to the full 1990–2016 estimation period.

Sixth, we took the predictions of cause-specific mortality by age, sex, geography, and year that DisMod-MR 2.1 calculated as being consistent with the data on incidence, prevalence, and the priors on excess mortality from step five. Socio-demographic Index was used as a country-level covariate. We excluded data for standardized mortality ratio, with-condition mortality rate, and relative risk as we wanted to estimate cause-specific mortality rates that were consistent with the level of excess mortality from the three chosen countries in 2016.

Seventh, because DisMod-MR 2.1 only produces estimates in five-year intervals, we expanded the time series by log-linear interpolation. Values for 1980-1990 were generated using a regression on the entire time series with Socio-demographic index included as a predictor.

Lastly, before adding the Parkinson mortality estimates into CodCorrect, we proportionately retrieved the difference in deaths between those estimated in CODEm and those estimated in step 7 from a set of ‘target causes’ which were identified as causes of death in cohort studies of persons with dementia. We assumed the same target causes for dementia would apply to Parkinson disease as well. The target causes included lower respiratory infections, protein-energy malnutrition, other nutritional deficiencies, cerebrovascular disease, interstitial nephritis and urinary tract infections, decubitus ulcer, and pulmonary aspiration and foreign body in airway.<sup>2 3 4 5</sup> More information on this process is located in section 4 of the appendix.

---

<sup>2</sup> Brunström HR, Englund EM. Cause of death in patients with dementia disorders. *European journal of neurology*. 2009 Apr 1;16(4):488-92.

<sup>3</sup> Thomas BM, Starr JM, Whalley LJ. Death certification in treated cases of presenile Alzheimer's disease and vascular dementia in Scotland. *Age and Ageing*. 1997 Sep 1;26(5):401-6.

<sup>4</sup> Todd S, Barr S, Roberts M, Passmore AP. Survival in dementia and predictors of mortality: a review. *International journal of geriatric psychiatry*. 2013 Nov 1;28(11):1109-24.

<sup>5</sup> Keene J, Hope T, Fairburn CG, Jacoby R. Death and dementia. *International journal of geriatric psychiatry*. 2001 Oct 1;16(10):969-74.

# Epilepsy

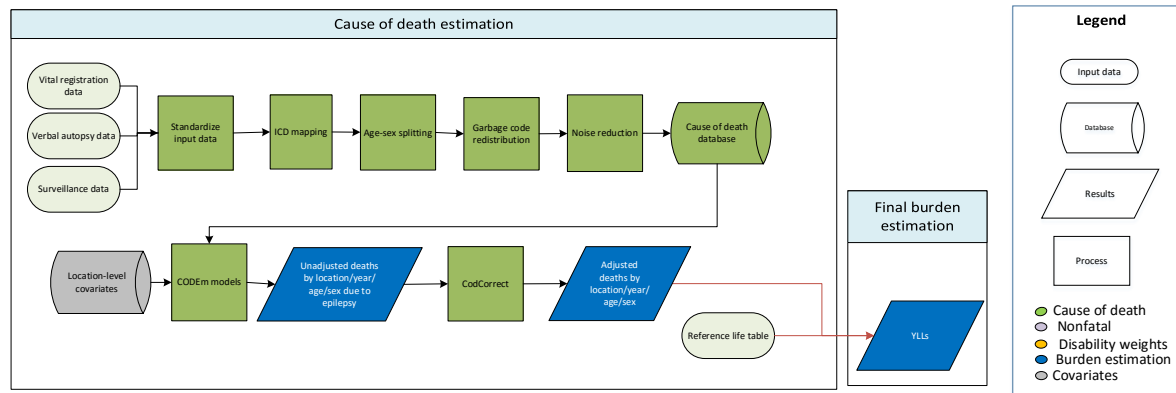

## Input data

Data used to estimate epilepsy mortality included vital registration (VR), verbal autopsy, and China mortality surveillance data from the cause of death (COD) database. Our outlier criteria were to exclude data points that were (1) implausibly high or low relative to global or regional patterns, (2) substantially conflicted with established age or temporal patterns, or (3) significantly conflicted with other data sources based from the same locations or locations with similar characteristics (i.e., socio-demographic index).

Based on these criteria, we excluded ICD-9 BTL data for Sri Lanka, Fiji, and Kiribati as the estimates varied from year to year between zero and high values. We also excluded the Survey of Causes of Death Data and Medical Certification of Cause of Death Data for India, as these data types were not consistent with the Sample Registration System Data and would have led to discontinuities in our estimates over time.

## Modelling strategy

The standard CODEm modelling approach was applied to estimate deaths due to epilepsy. Separate models were conducted for male and female mortality, and the age range for both models was 28 days–95+ years. For GBD 2016, the health systems access covariate was replaced with the health access and quality index covariate. There were no other substantial changes for GBD 2016. The covariates used are displayed below.

| Level | Covariate                              | Direction |
|-------|----------------------------------------|-----------|
| 1     | pig meat consumption (kcal per capita) | +         |
|       | pigs (per capita)                      | +         |
|       | SEV scalar: epilepsy                   | +         |
|       | mean systolic blood pressure (mmHg)    | +         |
| 2     | health access and quality index        | -         |
|       | mean body mass index                   | +         |
|       | mean serum total cholesterol (mmol/L)  | +         |

|   |                                  |   |
|---|----------------------------------|---|
| 3 | cumulative cigarettes (10 years) | + |
|   | cumulative cigarettes (5 years)  | + |
|   | education (years per capita)     | - |
|   | log LDI (per capita)             | - |
|   | Socio-demographic Index          | - |

## Multiple Sclerosis

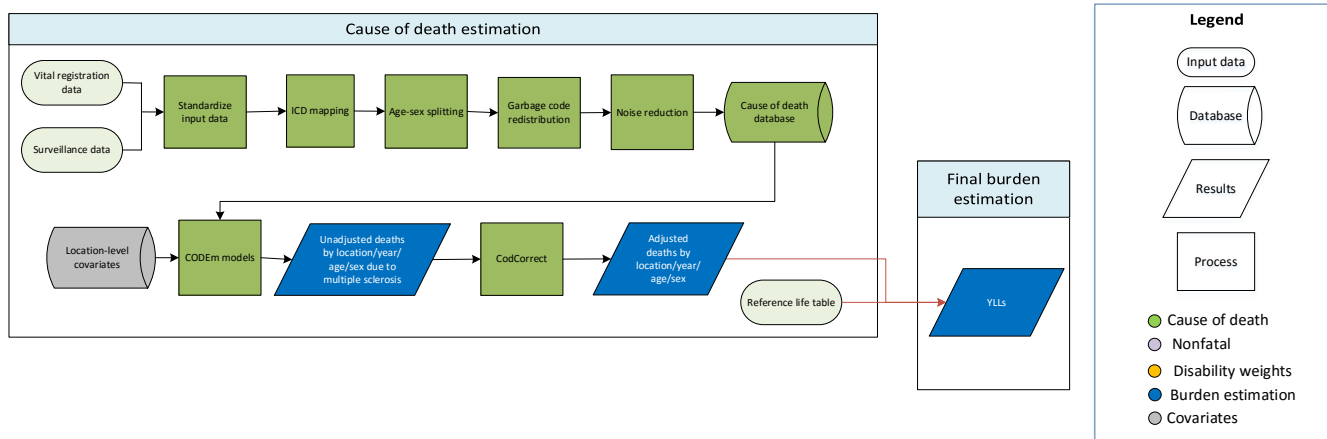

### Input data

Data used to estimate multiple sclerosis included vital registration and surveillance data from the cause of death (COD) database. Our outlier criteria were to exclude data points that (1) were implausibly high or low, (2) substantially conflicted with established age or temporal patterns, or (3) significantly conflicted with other data sources conducted from the same locations or locations with similar characteristics (ie, Socio-demographic Index).

### Modelling strategy

The standard CODEm modelling approach was used to estimate deaths due to multiple sclerosis. Separate models were conducted for male and female mortality, and the age range for both models was 20–95+ years. For GBD 2016, the health system access covariate was replaced by the new health care access and quality index covariate. Otherwise, there were no substantial changes from GBD 2015. The covariates used are displayed below.

| Level | Covariate                                | Direction |
|-------|------------------------------------------|-----------|
| 1     | absolute value of average latitude       | +         |
| 2     | animal fat consumption (kcal per capita) | +         |
|       | mean serum total cholesterol (mmol/L)    | +         |
|       | health care access and quality index     | -         |
| 3     | cumulative cigarettes (10 years)         | +         |
|       | cumulative cigarettes (5 years)          | +         |
|       | education (years per capita)             | -         |
|       | log-transformed LDI (per capita)         | -         |
|       | smoking prevalence                       | +         |
|       | Socio-demographic Index                  | +         |

## Motor Neuron Disease

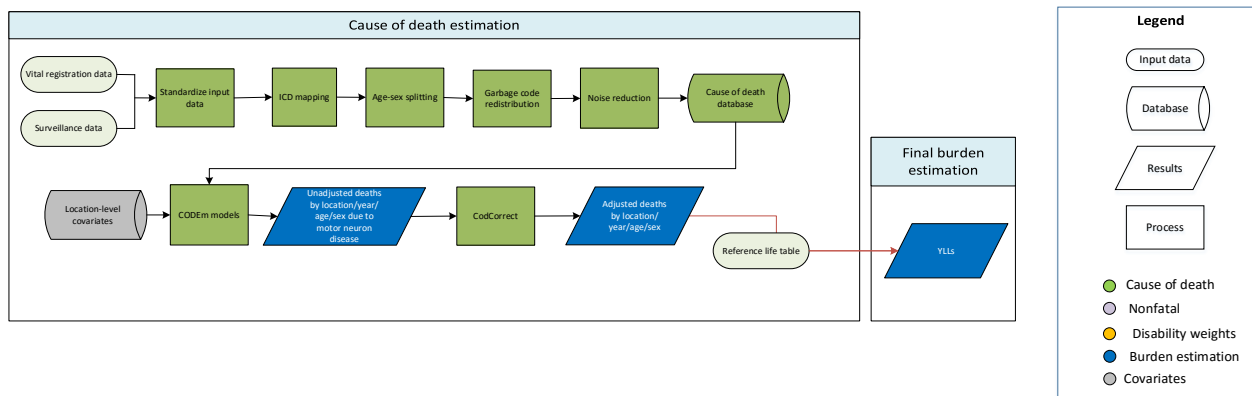

### Input data

Data used to estimate motor neuron disease mortality included vital registration and surveillance data from the cause of death (COD) database. Our outlier criteria excluded data points that (1) were implausibly high or low, (2) substantially conflicted with established age or temporal patterns, or (3) significantly conflicted with other data sources conducted from the same locations or locations with similar characteristics (ie, Socio-demographic Index).

### Modelling strategy

The standard CODEm modelling approach was used to estimate deaths due to multiple sclerosis. Separate models were conducted for male and female mortality, and the age range for both models was 20–95+ years. For GBD 2016, the fruit intake per capita covariate was adjusted to reflect intake per 2,000 kcal per day diet. Additionally, the health system access covariate was replaced by the health care access and quality index covariate. There were no other substantial changes from the GBD 2015 modelling strategy. The covariates used are displayed below.

| Level | Covariate                                      | Direction |
|-------|------------------------------------------------|-----------|
| 1     | asbestos production (kg per capita)            | +         |
|       | mean serum total cholesterol (mmol/L)          | 0         |
|       | fruit consumption (grams per day adjusted)     | 0         |
| 2     | absolute value of average latitude             | +         |
|       | sanitation (proportion with access)            | 0         |
|       | improved water source (proportion with access) | 0         |
|       | health care access and quality index           | -         |
| 3     | education (years per capita)                   | 0         |
|       | log-transformed LDI (per capita)               | 0         |
|       | Socio-demographic Index                        | 0         |

## Other Neurological Disorders

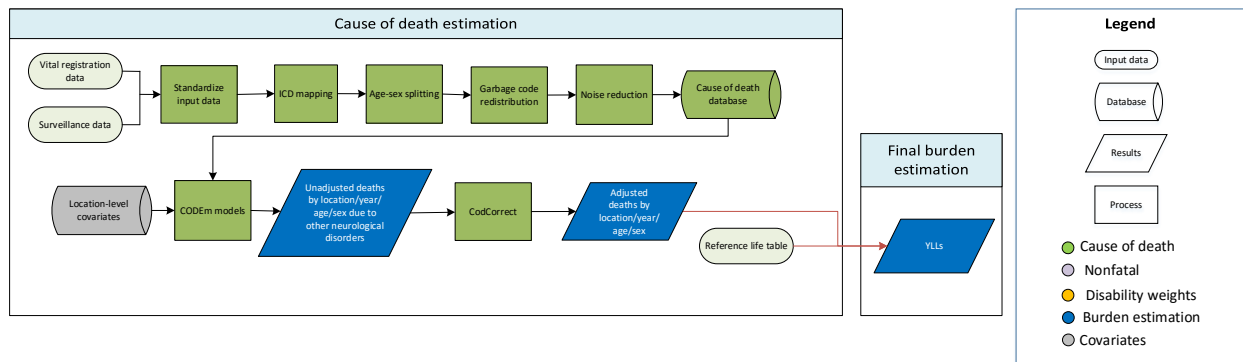

### Input data

Data used to estimate other neurological disorders included vital registration and surveillance data from the cause of death (COD) database. Our outlier criteria were to exclude data points that (1) were implausibly high or low, (2) substantially conflicted with established age or temporal patterns, or (3) significantly conflicted with other data sources conducted from the same locations or locations with similar characteristics (ie, Socio-demographic Index).

### Modelling strategy

The standard CODEm modelling approach was applied to estimate deaths due to other neurological disorders. Male and female CODEm models were run for deaths occurring between ages 28 days to 95+ years. For GBD 2016, the fruit and meat intake per capita covariates were adjusted to reflect intake per 2,000 kcal per day diet. Additionally, the covariate health system access was replaced with the health care access and quality index. There were no other significant changes from the GBD 2015 modelling strategy. The covariates used are displayed below.

| Level | Covariate                                              | Direction |
|-------|--------------------------------------------------------|-----------|
| 1     | underweight proportion was under 2 standard deviations | +         |
|       | mean body mass index                                   | +         |
|       | mean cholesterol                                       | +         |
|       | mean systolic blood pressure                           | +         |
|       | pig meat consumption (kcal per capita)                 | +         |
| 2     | alcohol (litres per capita)                            | +         |
|       | animal fat consumption (kcal per capita)               | +         |
|       | health care access and quality index                   | -         |
|       | fruit consumption adjusted                             | -         |
|       | population density over 1,000 per square kilometer pct | +         |
|       | red meat consumption adjusted                          | +         |
| 3     | cumulative cigarette consumption (10 years)            | +         |
|       | cumulative cigarette consumption (5 years)             | +         |
|       | education (years per capita)                           | -         |
|       | log-transformed LDI (per capita)                       | -         |
|       | smoking prevalence                                     | +         |

|  |                         |   |
|--|-------------------------|---|
|  | Socio-demographic Index | 0 |
|--|-------------------------|---|



## Alcohol Use Disorders

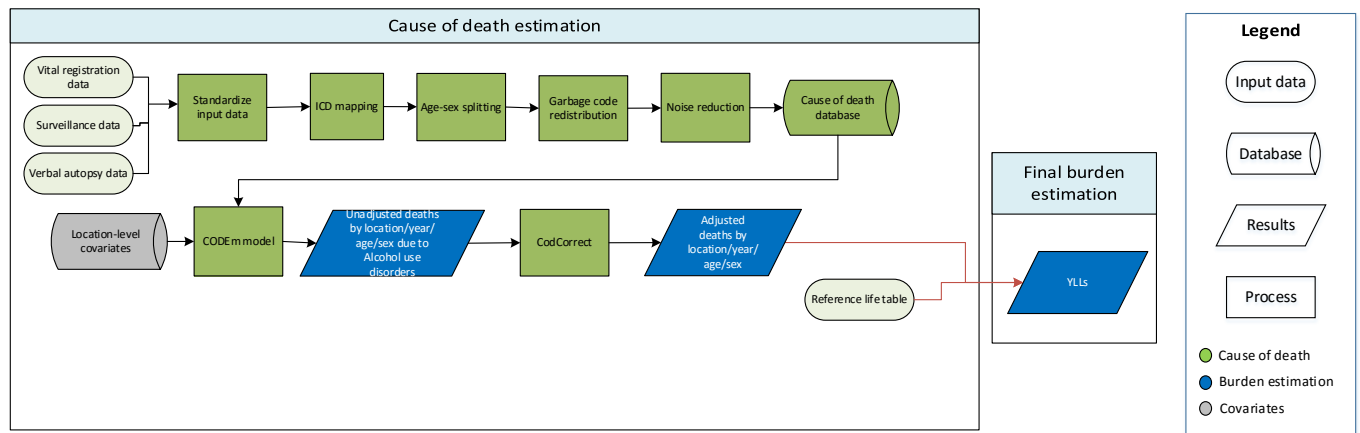

### Input data

All data were from vital registration, China surveillance, and verbal autopsy sources. Some data were outliered from countries with sparse yet heterogeneous data if it created implausible fluctuations in deaths and regional patterns. As an example, Medical Certification of Cause of Death data from India was excluded for alcohol use disorders due to the extremely low estimates.

### Modelling strategy

Cause of death modelling for alcohol use disorders followed the general CODEm strategy. There were no substantial changes from GBD 2015. Model covariate inclusion was based on empirical evidence and expert feedback which resulted in a set of model covariates that reflected alcohol consumption, smoking, education, health system access, percent of population Muslim, domestic income, and Socio-demographic Index (SDI).

**Table: covariates used in alcohol use CODEm model**

| Level | Covariate                               | Direction |
|-------|-----------------------------------------|-----------|
| 1     | alcohol consumption (litres per capita) | +         |
|       | alcohol binge drinking                  | +         |
| 2     | Muslim religion                         | -         |
|       | cumulative cigarettes (10 years)        | 0         |
|       | smoking prevalence                      | 0         |
|       | health care access and quality index    | -         |
| 3     | log LDI (I\$ per capita)                | -         |
|       | education (years per capita)            | -         |
|       | Socio-demographic Index                 | 0         |

A significant limitation to previous alcohol use models was assumptions surrounding the redistribution of garbage codes. In GBD 2016, ICD codes for accidental poisoning (X40-44) were redistributed to the underlying GBD cause (substance use disorder) using an algorithm devised from analyzing national registry data from several countries and expert feedback. This is an improvement on the alcohol use model from previous rounds of GBD.

## Drug use disorders

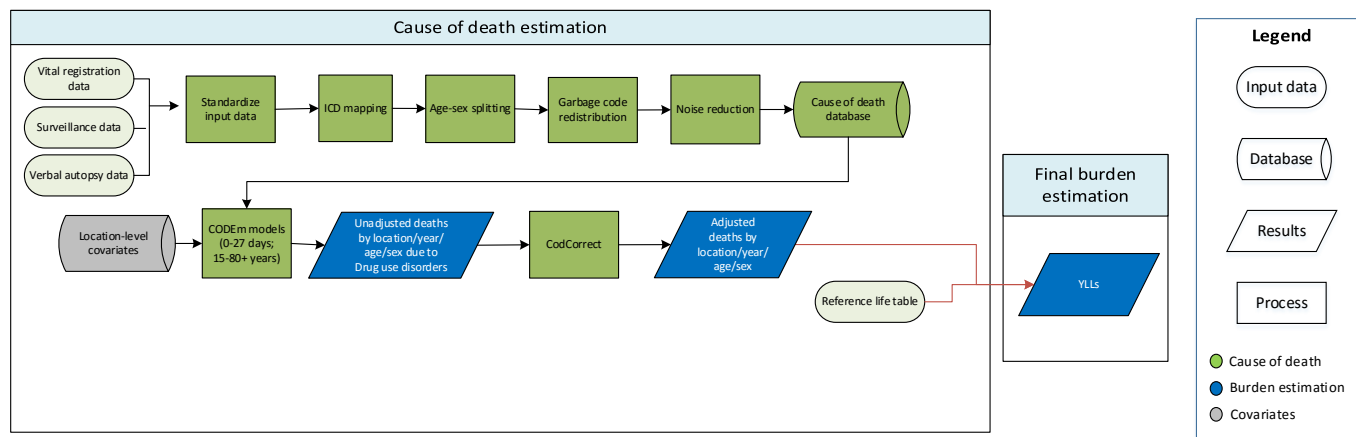

### Input data

All data were from vital registration, verbal autopsy and surveillance sources. Data from countries with sparse yet heterogeneous data were also excluded as the data exaggerated fluctuations in deaths and gave implausible regional patterns. Excluded data were typically from developing countries. Notably, a considerable amount of Medical Certification of Cause of Death (MCCD) data from India was excluded for drug use disorders. Specifically, it was decided to remove the MCCD ICD-9 data as a specific garbage redistribution package was not available for that time series. Additionally, it was decided to remove MCCD-ICD10 data from the Northeastern states of Meghalaya, Mizoram, Nagaland and Manipur (where the the much lower values in MCCD compared to SRS removed the expected higher death rates there) and also from the four states of Punjab, Uttarakhand, Jharkand and Karnataka (where the raw data are showed almost no deaths from drug use disorders).

### Modelling strategy

Cause of death modelling for drug use disorders followed the general CODEm strategy. In GBD 2016 additional geographies were included and age groups were extended beyond 80+. For GBD 2016, the health systems access covariate was replaced with the health care access and quality index covariate

**Table: covariates used in drug use disorders CODEm model**

| Level | Covariate                            | Direction |
|-------|--------------------------------------|-----------|
| 1     | alcohol use (litres per capita)      | +         |
|       | cumulative cigarettes (10 years)     | +         |
|       | cumulative cigarettes (5 years)      | +         |
|       | opium cultivation bin                | +         |
|       | smoking prevalence                   | +         |
| 2     | health care access and quality index | -         |

|   |                              |   |
|---|------------------------------|---|
| 3 | log LDI (I\$ per capita)     | 0 |
|   | education (years per capita) | 0 |
|   | Socio-demographic Index      | 0 |

The drug use model is the parent model of all other drug use causes (ie, amphetamine, cocaine, opioid, and other drug). It forms an envelope into which all four individual drug use models are squeezed during the CoDCorrect process.

A significant limitation to previous drug use models was assumptions surrounding the redistribution of garbage codes. In GBD 2016, ICD codes for accidental poisoning (X40-44) were redistributed to the underlying GBD cause (substance use disorder) using an algorithm devised from analyzing national registry data from several countries and expert feedback. This is an improvement on the drug use model from previous rounds of GBD and we plan to refine that further in future iterations of GBD. There were no other substantial changes from GBD 2015.

## Opioid dependence

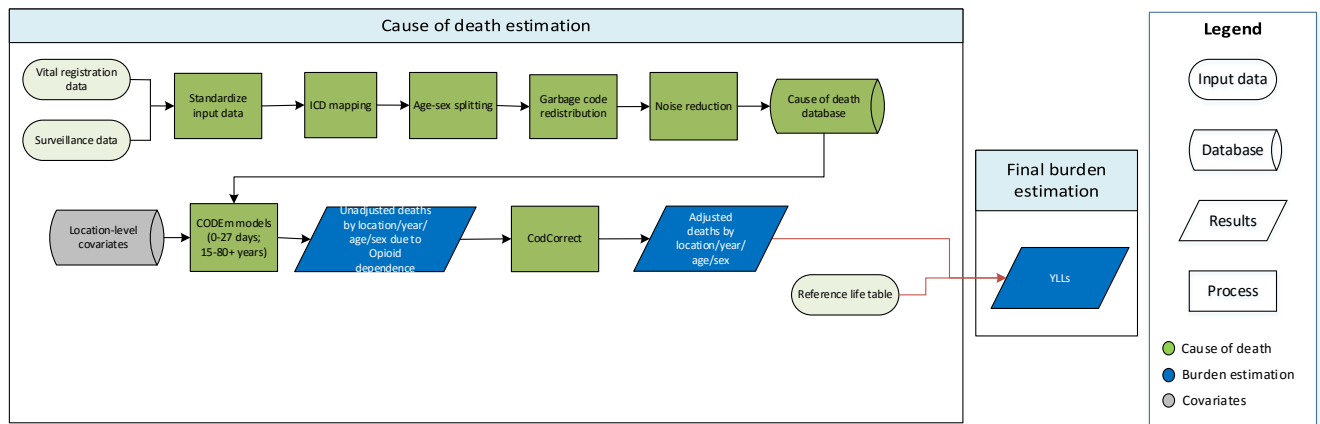

### Input data

All data were from vital registration and surveillance sources. Data from countries with sparse yet heterogeneous data were also excluded as the data exaggerated fluctuations in deaths and gave implausible regional patterns. Excluded data were typically from developing countries.

### Modelling strategy

Cause of death modelling for opioid use followed the general CODEm strategy. In GBD 2016 additional geographies were included and age groups were extended beyond 80+. For GBD 2016, the health systems access covariate was replaced with the health care access and quality index covariate.

**Table: covariates used in opioid use CODEm model**

| Level | Covariate                            | Direction |
|-------|--------------------------------------|-----------|
| 1     | alcohol (litres per capita)          | +         |
|       | cumulative cigarettes (10 years)     | +         |
|       | cumulative cigarettes (5 years)      | +         |
|       | opium cultivation bin                | +         |
|       | smoking prevalence                   | +         |
| 2     | health care access and quality index | -         |
| 3     | log LDI (I\$ per capita)             | 0         |
|       | education (years per capita)         | 0         |
|       | Socio-demographic Index              | 0         |

A significant limitation to previous opioid use models was assumptions surrounding the redistribution of garbage codes. In GBD 2016, ICD codes for accidental poisoning (X40-44) were redistributed to the underlying GBD cause (substance use disorder) using an algorithm devised from analyzing national registry data from several countries and expert feedback. This is an improvement on the opioid use model from previous rounds of GBD. There were no other substantial changes from GBD 2015.

## Cocaine Dependence

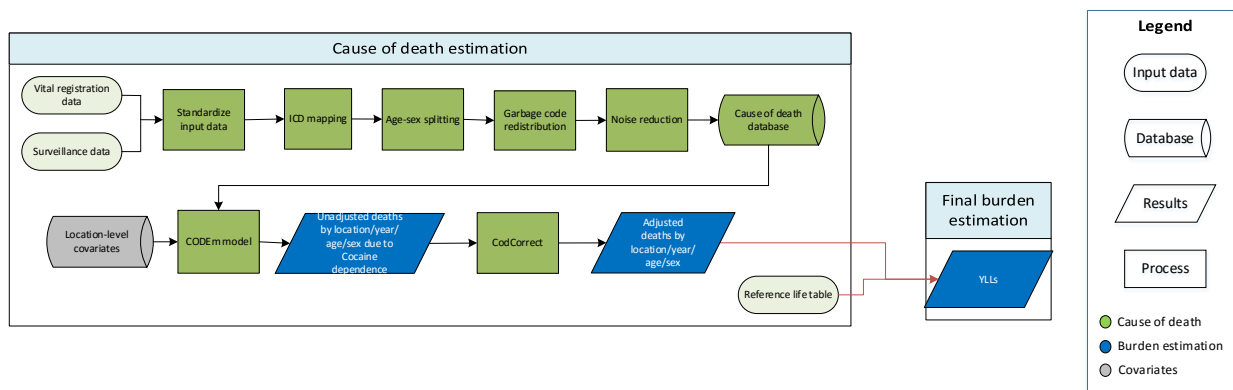

### Input data

All data were from vital registration and surveillance sources. Data from countries with sparse yet heterogeneous data were also excluded as the data exaggerated fluctuations in deaths and gave implausible regional patterns. Excluded data were typically from developing countries.

### Modelling strategy

Cause of death modelling for cocaine use followed the general CODEm strategy. In GBD 2016 additional geographies were included and age groups were extended beyond 80+. For GBD 2016, the health systems access covariate was replaced with the health care access and quality index covariate.

**Table: covariates used in cocaine use CODEm model**

| Level | Covariate                            | Direction |
|-------|--------------------------------------|-----------|
| 1     | alcohol use (litres per capita)      | +         |
|       | cumulative cigarettes (10 years)     | +         |
|       | cumulative cigarettes (5 years)      | +         |
|       | smoking prevalence                   | +         |
| 2     | health care access and quality index | -         |
| 3     | log LDI (I\$ per capita)             | 0         |
|       | education (years per capita)         | 0         |
|       | Socio-demographic Index              | +         |

A significant limitation to previous cocaine use models was assumptions surrounding the redistribution of garbage codes. In GBD 2016, ICD codes for accidental poisoning (X40-44) were redistributed to the underlying GBD cause (substance use disorder) using an algorithm devised from analyzing national registry data from several countries and expert feedback. This is an improvement on the cocaine use model from previous rounds of GBD. There were no other substantial changes from GBD 2015.

# Amphetamine Dependence

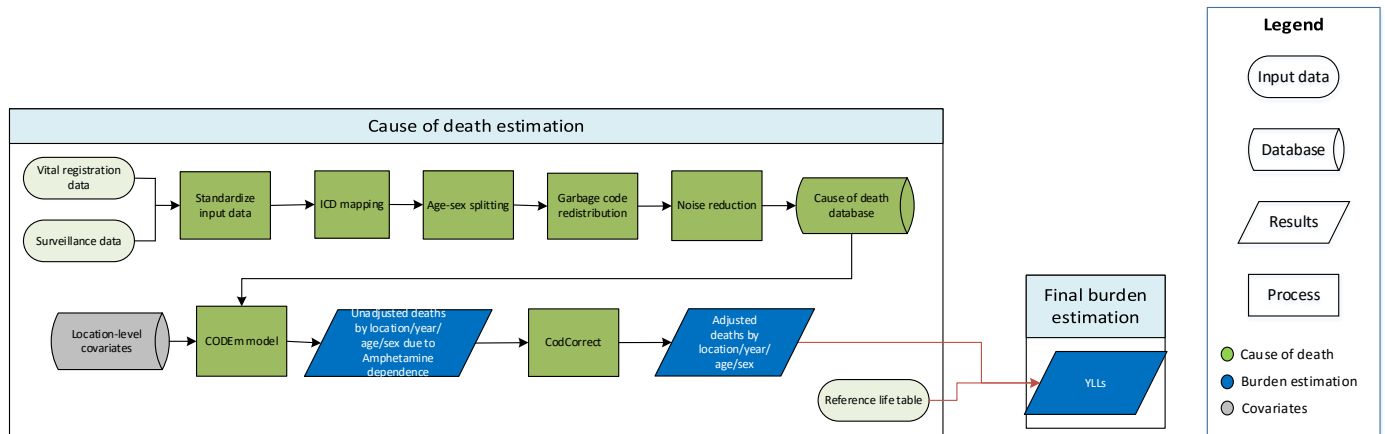

## Input data

All data were from vital registration and surveillance sources. Data from countries with sparse yet heterogeneous data were also excluded as the data exaggerated fluctuations in deaths and gave implausible regional patterns. Excluded data were typically from developing countries.

## Modelling strategy

Cause of death modelling for amphetamine use followed the general CODEm strategy. In GBD 2016 additional geographies were included and age groups were extended beyond 80+. For GBD 2016, the health systems access covariate was replaced with the health care access and quality index covariate.

**Table: covariates used in amphetamine use CODEm model**

| Level | Covariate                            | Direction |
|-------|--------------------------------------|-----------|
| 1     | alcohol use (litres per capita)      | +         |
|       | cumulative cigarettes (10 years)     | +         |
|       | cumulative cigarettes (5 years)      | +         |
|       | smoking prevalence                   | +         |
| 2     | health care access and quality index | -         |
| 3     | log LDI (I\$ per capita)             | 0         |
|       | education (years per capita)         | 0         |
|       | Socio-demographic Index              | +         |

A significant limitation to previous amphetamine use models was assumptions surrounding the redistribution of garbage codes. In GBD 2015, ICD codes for accidental poisoning (X40-44) were redistributed to the underlying GBD cause (substance use disorder) using an algorithm devised from analyzing national registry data from several countries and expert feedback. This is an improvement on the amphetamine use model from previous rounds of GBD. There were no other substantial changes from GBD 2015.



## Other drug use disorders

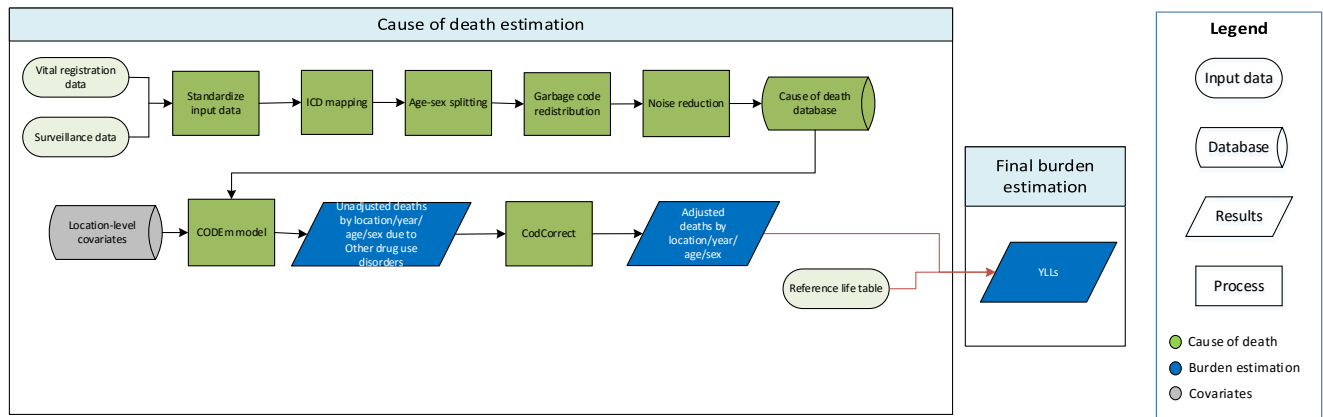

### Input data

All data were from vital registration and China surveillance sources. Data from countries with sparse yet heterogeneous data were also excluded as the data exaggerated fluctuations in deaths and gave implausible regional patterns. Excluded data were typically from developing countries.

### Modelling strategy

Cause of death modelling for other drug use followed the general CODEm strategy. In GBD 2016 additional geographies were included and age groups were extended beyond 80+. For GBD 2016, the health systems access covariate was replaced with the health care access and quality index covariate.

**Table: covariates used in other drug use CODEm model**

| Level | Covariate                            | Direction |
|-------|--------------------------------------|-----------|
| 1     | alcohol (litres per capita)          | +         |
|       | cumulative cigarettes (10 years)     | +         |
|       | cumulative cigarettes (5 years)      | +         |
|       | smoking prevalence                   | +         |
| 2     | health care access and quality index | -         |
| 3     | log LDI (I\$ per capita)             | 0         |
|       | education (years per capita)         | 0         |
|       | Socio-demographic Index              | 0         |

A significant limitation to previous other drug use models were assumptions surrounding the redistribution of garbage codes. In GBD 2016, ICD codes for accidental poisoning (X40-44) were redistributed to the underlying GBD cause (substance use disorder) using an algorithm devised from analyzing national registry data from several countries and expert feedback. This is an improvement on the other drug use model from previous rounds of GBD. There were no other substantial changes from GBD 2015.

# Eating disorders

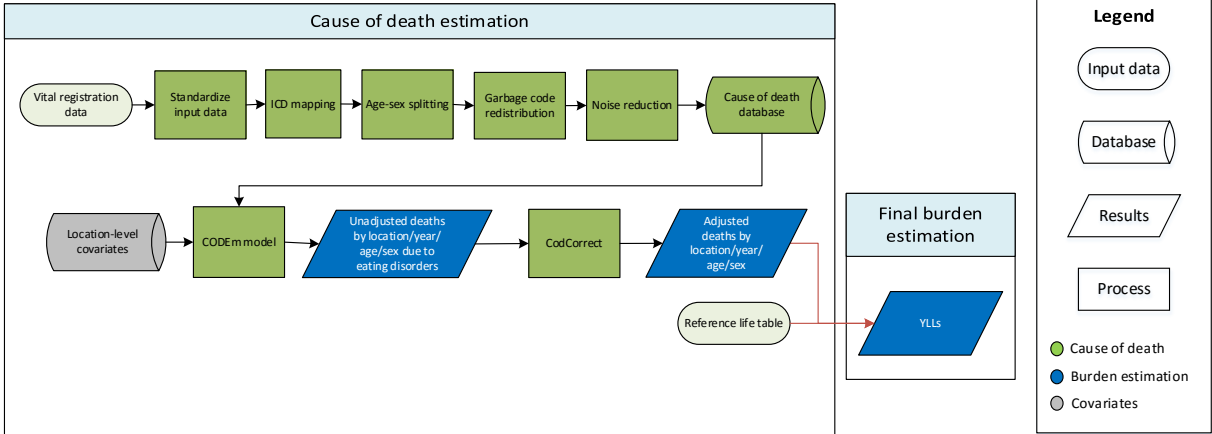

## Input data

Data used to estimate eating disorders mortality included vital registration data from the cause of death (COD) database. Data points from sub-Saharan Africa were excluded as the redistribution of garbage codes led to implausible rates and age patterns of deaths due to eating disorders. Additionally, we excluded data from countries with small populations and sparse yet heterogeneous data, as these sources exaggerated fluctuations in deaths and gave implausible regional patterns. Data were excluded from countries including but not limited to Caribbean countries, Oceanic countries, Brunei, El Salvador, Guatemala, Morocco, Malaysia, Philippines, Algeria, Palestine, Greenland, and Malta.

## Modelling strategy

Eating disorders was modelled using standard CODEm modelling approach and encompassing the two child models of anorexia nervosa and bulimia nervosa. Age was restricted to deaths occurring between 5 and 49 years of age based on expert advice and patterns of prevalence seen in the non-fatal models of anorexia nervosa and bulimia nervosa. Several covariates were applied to this model and are listed in the table below, along with the direction in which they were applied.

| Level | Covariate                                              | Direction |
|-------|--------------------------------------------------------|-----------|
| 1     | education (years per capita)                           | +         |
|       | log LDI (I\$ per capita)                               | +         |
|       | underweight (proportion <2SD weight for age, <5 years) | -         |
|       | sanitation (proportion with access)                    | +         |
|       | maternal education (years per capita)                  | +         |
| 2     | health care access and quality index                   | -         |
| 3     | Socio-demographic Index                                | +         |

In GBD 2013, eating disorders were modelled as a negative binomial model using a custom approach. This approach was changed in GBD 2015 with eating disorders being modelled as a standard CODEm model. The modelling strategy was changed in GBD 2015 as no obvious benefit was seen from using the custom modelling approach. As such, it was decided that all eating disorders (eating disorders, anorexia nervosa, and bulimia nervosa) would be modelled using CODEm. GBD 2016 utilised the same approach as GBD 2015 with the only difference being the inclusion of covariates.

The rate of deaths due to eating disorders is relatively low although we suspect that in many countries, particularly developing countries, the coding of deaths to eating disorders is inconsistent. For example, a sharp increase in deaths was seen in the raw data from age 50 onward, which we believe is due to the incorrect assignments of deaths eg, deaths from starvation due to neglect or causes such as dementia being incorrectly assigned to anorexia nervosa which is then reflected in the overarching eating disorders model. This causes issues when trying to discern plausible patterns in age and geography.

## Anorexia nervosa

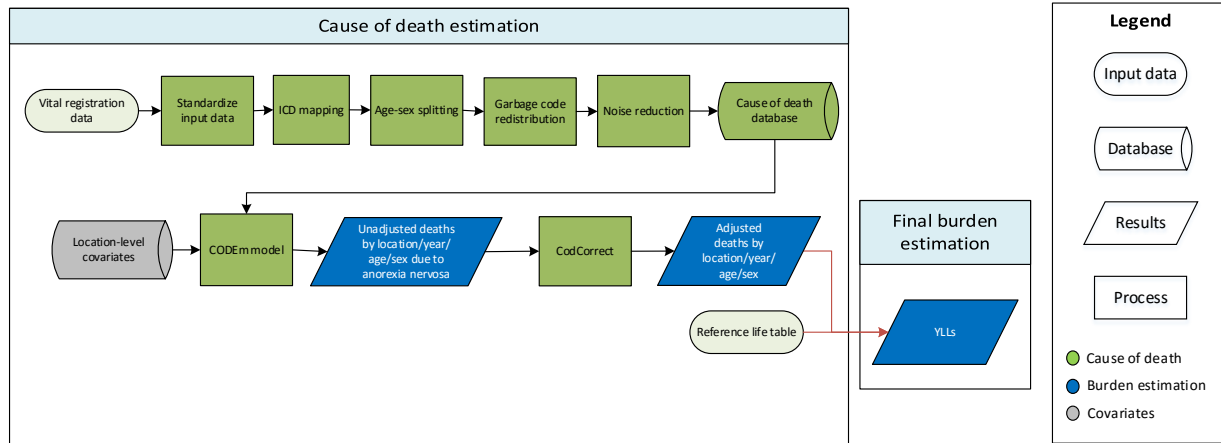

### Input data

Data used to estimate anorexia nervosa mortality included centrally prepped vital registration data from the cause of death (COD) database. Data points from sub-Saharan Africa were excluded as the redistribution of garbage codes led to implausible rates and age patterns of deaths due to eating disorders. Additionally, we excluded data from countries with small populations and sparse yet heterogeneous data as these sources exaggerated fluctuations in deaths and gave implausible regional patterns. Data were also excluded from countries including but not limited to Caribbean countries, Oceanic countries, some Central Latin American countries, and other developing countries (particularly those with small populations).

### Modelling strategy

Anorexia nervosa was modelled using the standard CODEm approach and came under the eating disorders parent model. Age was restricted to deaths occurring between 5 and 49 years based on expert advice and patterns of prevalence seen in the non-fatal model. Several covariates were applied to this model and are listed in the table below, along with the direction in which they were applied.

| Level | Covariate                                              | Direction |
|-------|--------------------------------------------------------|-----------|
| 1     | education (years per capita)                           | +         |
|       | log LDI (I\$ per capita)                               | +         |
|       | underweight (proportion <2SD weight for age, <5 years) | -         |
|       | sanitation (proportion with access)                    | +         |
|       | maternal education (years per capita)                  | +         |
| 2     | health care access and quality index                   | -         |
| 3     | Socio-demographic Index                                | +         |

In GBD 2013, anorexia nervosa deaths were extrapolated from the eating disorders model, which was modelled through a negative binomial approach. In GBD 2015, we changed this strategy and modelled anorexia nervosa deaths through a standard CODEm approach under the overarching eating disorders model as there was no benefit observed from applying the custom approach. As such, it was decided that all eating disorders (eating disorders, anorexia nervosa, and bulimia nervosa) would be modelled using CODEm. GBD 2016 utilised the same approach as GBD 2015 with the only difference being the inclusion of covariates.

The rate of deaths due to anorexia nervosa is relatively low although we suspect that in many countries, particularly lower-income countries, the coding of deaths to eating disorders is inconsistent. For example, a sharp increase in deaths was seen in the raw data from age 50 onward, which we believe is due to the incorrect assignments of deaths to anorexia nervosa, eg, deaths from starvation due to dementia being incorrectly assigned to anorexia nervosa. This causes issues when trying to discern plausible patterns in age and geography.

## Bulimia nervosa

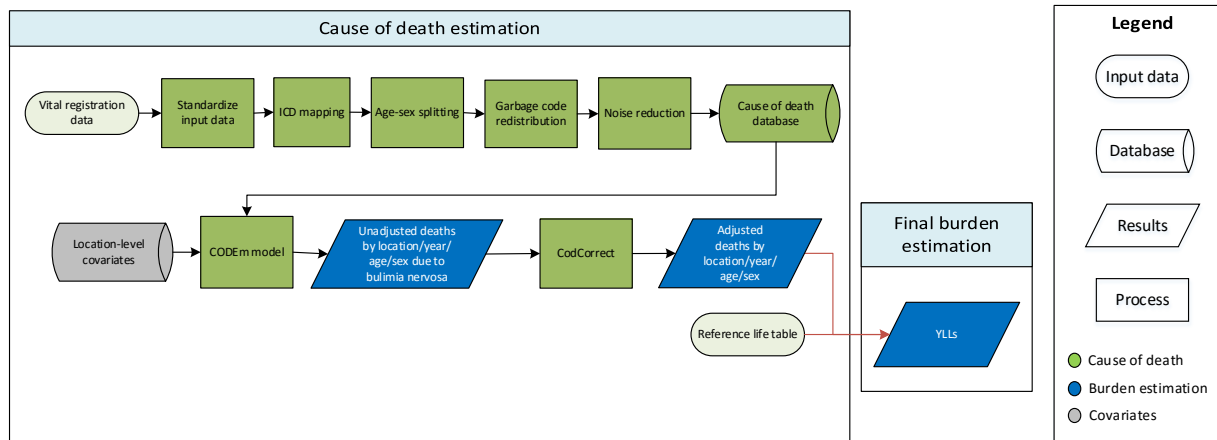

### Input data

Data used to estimate bulimia nervosa mortality included centrally prepped vital registration data from the cause of death (COD) database. Data points from sub-Saharan Africa were excluded as the redistribution of garbage codes led to implausible rates and age patterns of deaths due to eating disorders. Additionally, we excluded data from countries with small populations and sparse yet heterogeneous data, as these sources exaggerated fluctuations in deaths and gave implausible regional patterns. This included, but was not limited to, Greenland, Malta, and Brunei.

### Modelling strategy

Bulimia nervosa was modelled using the standard CODEm approach and comes under the eating disorders parent model. Age was restricted to deaths occurring between 5 and 49 years based on expert advice and patterns of prevalence seen in the non-fatal model. Several covariates were applied to this model and are listed in the table below, along with the direction in which they were applied.

| Level | Covariate                                              | Direction |
|-------|--------------------------------------------------------|-----------|
| 1     | education (years per capita)                           | +         |
|       | log LDI (I\$ per capita)                               | +         |
|       | underweight (proportion <2SD weight for age, <5 years) | -         |
|       | sanitation (proportion with access)                    | +         |
|       | maternal education (years per capita)                  | +         |
| 2     | health care access and quality index                   | -         |
| 3     | Socio-demographic Index                                | +         |

In GBD 2013, bulimia nervosa was not modelled as a distinct cause of death. Any deaths due to bulimia nervosa were attributed to the eating disorders model. We changed this approach in GBD 2015, recognizing bulimia nervosa as an individual cause of death and therefore modelled it as a standard CODEm model under the overarching eating disorders model. This decision was based on observing deaths due to bulimia nervosa in high-quality vital registration data, such as data from the US. These data also include eating disorders not otherwise specified. GBD 2016 utilised the same approach as GBD 2015 with the only difference being the inclusion of covariates.

The rate of deaths due to bulimia nervosa is relatively low although we suspect that in many countries, particularly lower-income countries, the coding of deaths to eating disorders is inconsistent. Furthermore, the inclusion of deaths due to eating disorders not otherwise specified may add more noise to the model. This causes issues when trying to discern plausible patterns in age and geography.



# Diabetes Mellitus

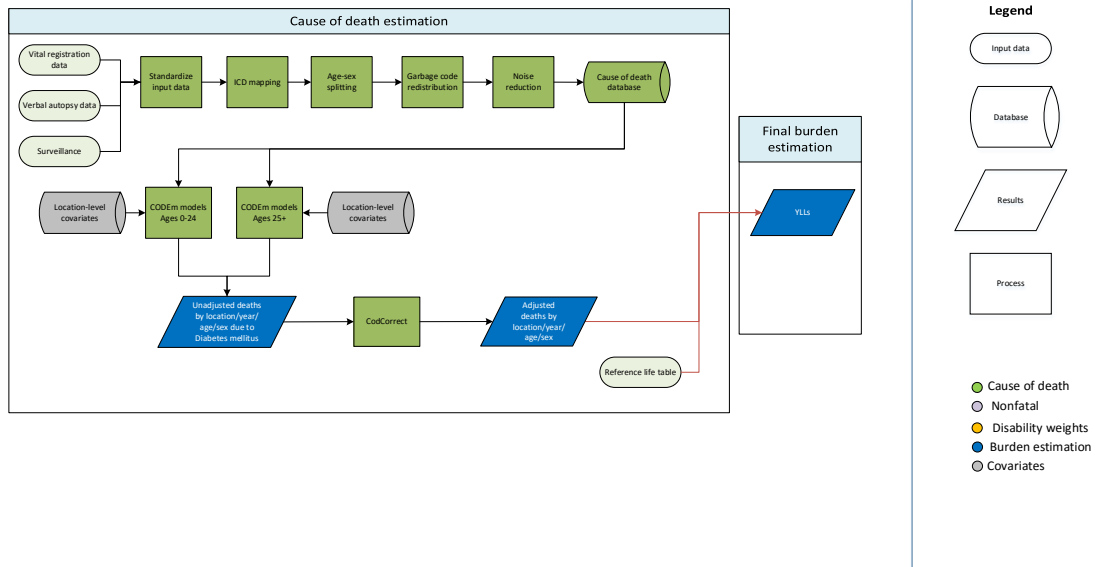

## Input data

**Verbal Autopsy Data:** We outliered VA data points in urban Indian states where high-quality vital registration data were also available. We also outliered data points where the VA data were implausible in all age groups as we determined that these data sources were unreliable.

**Vital Registration Data:** We outliered all data in four urban Indian states where the source of the data was unreliable according to expert opinion. We also outliered ICD9BTL data points which were inconsistent with the rest of the data series and created unlikely time trends.

## Modeling strategy

We used a slight variation on the standard CODEm approach to model deaths from diabetes mellitus. Since deaths in younger age groups are almost exclusively due to Type 1 diabetes while deaths in older ages are primarily due to Type 2, we used two models to estimate overall diabetes deaths. We reviewed the cause-fraction of deaths due to Type 1 and Type 2 diabetes at the global, super region, and regional level. We selected a conservative estimate of 25 years; one model is for deaths in 0-25 year olds and the second model is for deaths in 25+ year olds.

The following list are the covariates included in the model.

- Education years per-capita
- A composite score that approximates access to and quality of personal healthcare (Healthcare Access and Quality Index)
- Lag distributed GDP per capita in base 2010 international dollars
- Estimated national availability of animal fat expressed as kilocalories per capita
- Mean diabetes fasting plasma glucose (mmol/L) by age group
- Age-standardized prevalence of diabetes

- Age-standardized mean body mass index for adults ages 20+ (separate by sex)
- Mean serum total cholesterol (mmol/L) for individuals above age 25
- Mean systolic blood pressure (mmHg) for individuals above age 25
- Estimated energy adjusted national availability of fruits expressed in grams per person per day
- Estimated energy adjusted national availability of vegetables expressed in grams per person per day
- Estimated energy adjusted national availability of whole grains expressed in grams per person per day
- Estimated national availability of dietary energy expressed in kilocalories per person per day

## Acute Glomerulonephritis

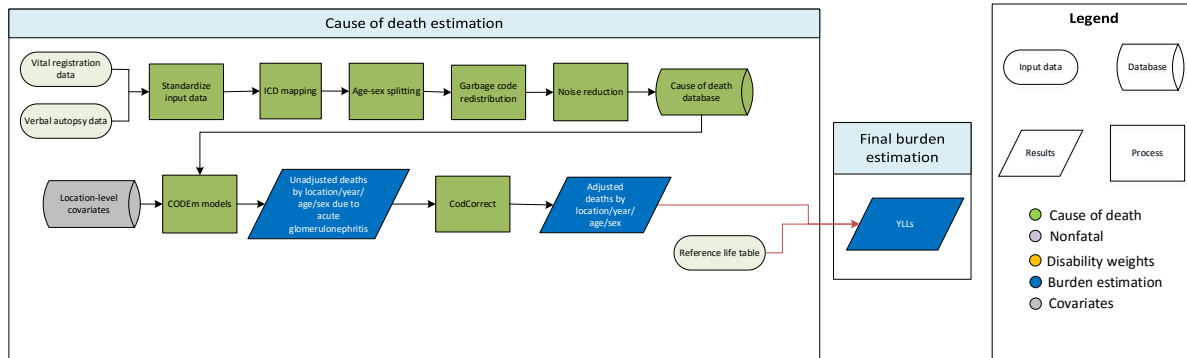

### Input data

Vital registration data were used to model mortality due to acute glomerulonephritis. Vital registration data were standardized and mapped according to the GBD causes of death ICD mapping method. These data were then age-sex split, and appropriate redistribution of garbage code data was performed. After applying noise reduction, these data were uploaded to the COD database. Outliers were identified by systematic examination of data points for all location-years. Data points that violated well-established age or time trends or that resulted in extremely high or low cause fractions were determined to be outliers.

### Modelling strategy

The estimation strategy used for fatal acute glomerulonephritis is largely similar to methods used in GBD 2015. A standard CODEm model with location-level covariates was used to model deaths due to acute glomerulonephritis. Age-restrictions for death estimations secondary to acute glomerulonephritis include 28 days for lower bound, 95+ for upper bound. Iterations of models were assessed at the location/year/age-group/sex level to determine whether data points merited exclusion via outliering. Unadjusted death estimates were adjusted using CoDCorrect to produce final estimates of YLLs. The estimates are limited by a paucity of data for regions such as Eastern and Central sub-Saharan Africa. The covariates used are displayed below.

| Level | Covariate                                       | Direction |
|-------|-------------------------------------------------|-----------|
| 2     | Diabetes age-standardized prevalence            | +         |
|       | Mean systolic blood pressure (mmHg)             | +         |
|       | Sanitation (proportion with access)             | -         |
|       | Improved water sources (proportion with access) | -         |
|       | Health care access and quality index            | -         |
| 3     | Socio-demographic Index                         | -         |
|       | Education (years per capita)                    | -         |
|       | Log LDI (\$I per capita)                        | -         |

## Chronic Kidney Disease

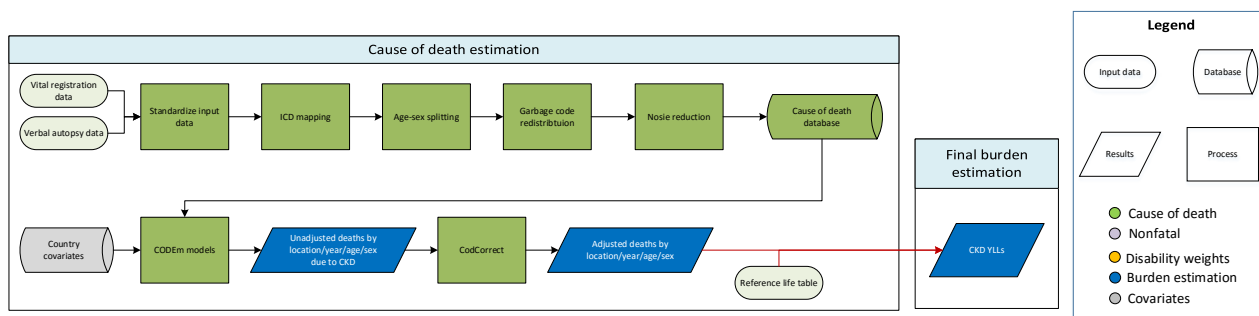

### Input data

Vital registration and verbal autopsy data were used to model mortality due to urolithiasis. Outliers were identified by systematic examination of data points for all location-years. Data were standardised and mapped according to the GBD causes of death ICD mapping method. These data were then age-sex split, and appropriate redistribution of garbage code data was performed. Data points that violated well-established age or time trends or that resulted in extremely high or low cause fractions were determined to be outliers. For GBD 2016, deaths due to congenital kidney anomalies (cystic kidney disease and reflux hydronephrosis) were attributed to chronic kidney disease, marking a change from GBD 2015 when these deaths were assigned to congenital anomalies.

### Modelling strategy

The estimation strategy used for fatal chronic kidney disease is largely similar to methods used in GBD 2015. A standard CODEm model with location-level was used to model deaths due to chronic kidney disease. Iterations of models were assessed at the location/year/age-group/sex level to determine whether data points merited exclusion via outliering. Unadjusted death estimates were adjusted using CoDCorrect to produce final estimates of YLLs. The covariates used are displayed below.

| Level | Covariate                                         | Direction |
|-------|---------------------------------------------------|-----------|
| 1     | Diabetes fasting plasma glucose (mmol/L)          | +         |
|       | Diabetes age-standardized prevalence (proportion) | +         |
|       | Mean systolic blood pressure (mmHg)               | +         |
|       | Mean BMI                                          | +         |
|       | Health care access and quality index              | -         |
| 2     | Mean cholesterol                                  | +         |
|       | Total calories (kcal per capita)                  | -         |
|       | Red meat (kcal per capita)                        | 0         |
|       | Whole grains (kcal per capita)                    | 0         |
|       | Animal fat (kcal per capita)                      | 0         |
| 3     | Socio-demographic Index                           | 0         |
|       | Education (years per capita)                      | -         |
|       | Log LDI (\$I per capita)                          | -         |

## Chronic Kidney Disease subtypes

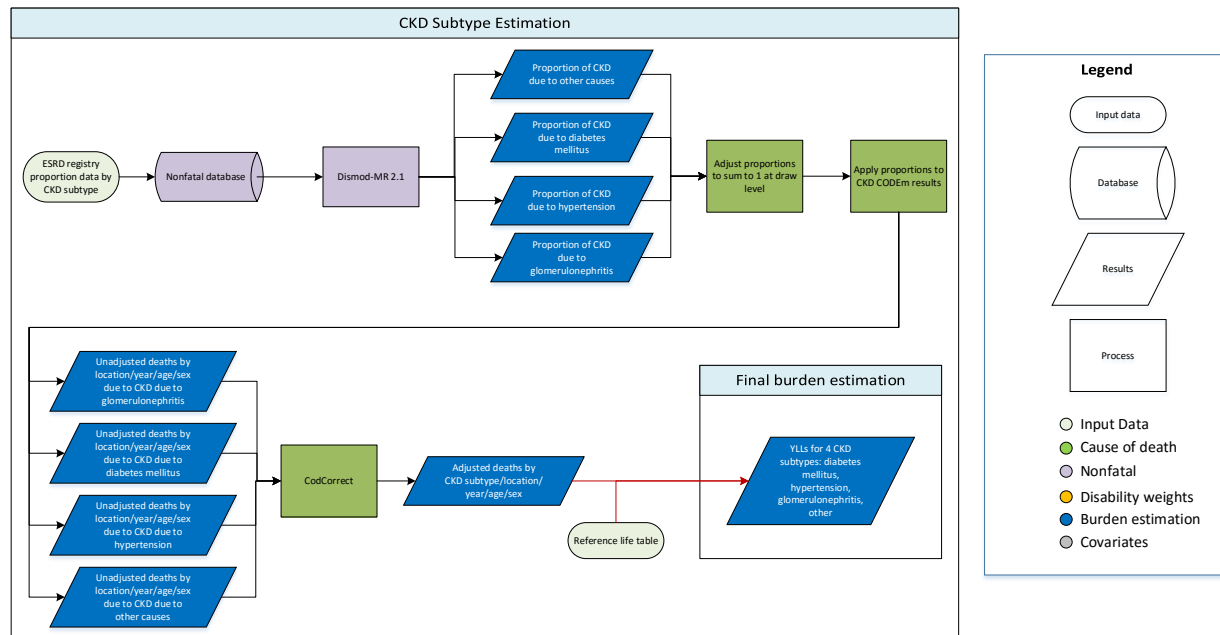

### Input data

The estimation strategy for CKD subtypes of 1) diabetes mellitus, 2) hypertension, 3) glomerulonephritis, and 4) “other” has changed significantly from the GBD 2015 analysis to achieve consistency of method among the four subtypes. This improved method is detailed below.

Data from end-stage renal disease registries were used to inform estimates of proportion of CKD mortality attributable to each CKD subtype. These data were age-split using the age pattern obtained from the Australia & New Zealand Dialysis and Transplant Registry (ANZDATA) which provides age and subtype-specific data. The age-pattern was determined by calculating the number of cases of CKD by etiology over the total number of cases for all etiologies for each 5-year age group. Then, aggregate-age proportions were split using the age-specific prevalence proportions and rescaled to sum to 1 within each 5-year age group.

Vital registration (VR) data were excluded from estimates as etiology coding in VR sources was considered highly variable and inconsistent between countries.

### Modelling strategy

We ran DisMod-MR 2.1 models including diabetes prevalence and mean systolic blood pressure as country-level covariates to obtain estimates of proportions for each subtype by location, year, age, and sex. The results from these models were adjusted so that estimates across the subtypes equaled 1 at each of 1,000 draws. These adjusted proportions were applied to the parent CKD CODEm model.

| <b>Model</b>                            | <b>Covariate</b>                     | <b>Value</b>               | <b>Exponentiated</b>  |
|-----------------------------------------|--------------------------------------|----------------------------|-----------------------|
| CKD proportion due to diabetes mellitus | Diabetes age-standardized prevalence | 0.36<br>(0.29 – 0.42)      | 1.43<br>(1.34 – 1.53) |
| CKD proportion due to hypertension      | Mean systolic blood pressure         | 0.013<br>(0.00036 – 0.043) | 1.01<br>(1.00 – 1.04) |

## Urinary diseases and male infertility

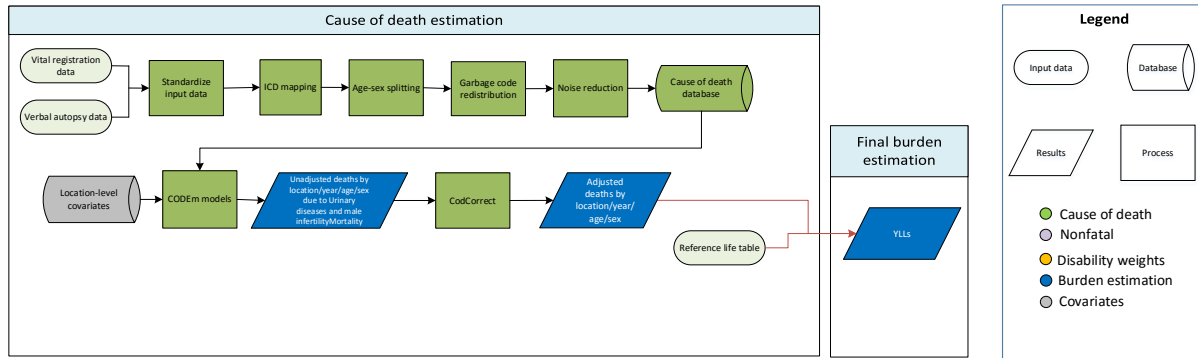

### Input data

Vital registration data was used to model mortality due to urinary diseases and male infertility. Vital registration data were standardized and mapped according to the GBD causes of death ICD mapping method. These data were then age-sex split, and appropriate redistribution of garbage code data was performed. After applying noise reduction, these data were uploaded to the COD database. Outliers were identified by systematic examination of data points for all location-years. Data points that violated well-established age or time trends or that resulted in extremely high or low cause fractions were determined to be outliers.

### Modelling strategy

The estimation strategy used for fatal urinary diseases and male infertility is largely similar to methods used in GBD 2015. A standard CODEm model with location-level covariates was used to model deaths due to urinary diseases and male infertility. Iterations of models were assessed at the location/year/age-group/sex level to determine whether data points merited exclusion via outliering. The estimates are limited by a paucity of data for regions such as Eastern and Central sub-Saharan Africa. The results of this disease differ by gender as no “male infertility” estimates were performed among women. The covariates used are displayed below.

| Level | Covariate                            | Direction |
|-------|--------------------------------------|-----------|
| 2     | Mean BMI                             | +         |
|       | Health care access and quality index | -         |
|       | Latitude under 15 (proportion)       | 0         |
|       | Latitude 15 to 30 (proportion)       | 0         |
|       | Latitude 30 to 45 (proportion)       | 0         |
|       | Latitude over 45 (proportion)        | 0         |
| 3     | Education (years per capita)         | -         |
|       | Log LDI (\$I per capita)             | -         |
|       | Socio-demographic Index              | 0         |

## Interstitial Nephritis and Urinary Tract Infections

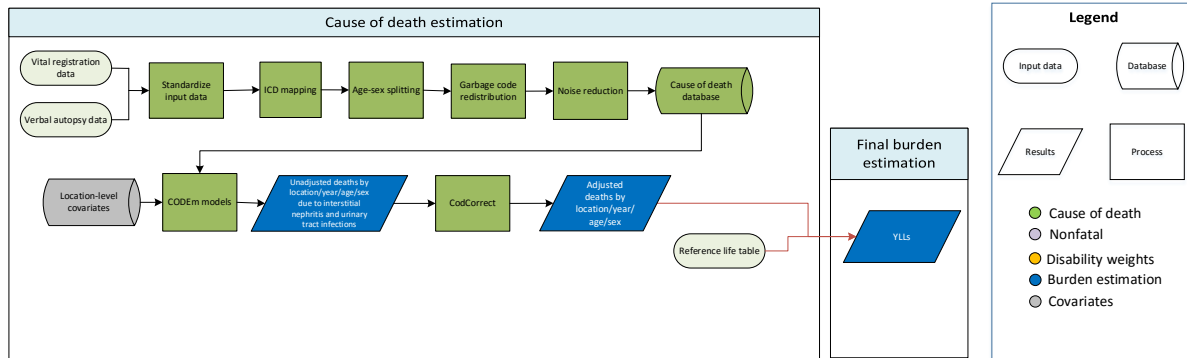

### Input data

Vital registration and verbal autopsy data were used to model mortality due to interstitial nephritis. Data were standardized and mapped according to the GBD causes of death ICD mapping method. These data were then age-sex split, and appropriate redistribution of garbage code data was performed. After applying noise reduction, these data were uploaded to the COD database. Outliers were identified by systematic examination of data points for all location-years. Data points that violated well-established age or time trends or that resulted in extremely high or low cause fractions were determined to be outliers.

### Modelling strategy

The estimation strategy used for fatal interstitial nephritis is largely similar to methods used in GBD 2015. A standard CODEm model with location-level covariates was used to model deaths due to interstitial nephritis. Age-restrictions for death estimations secondary to interstitial nephritis include 0 days for lower bound, 80+ for upper bound. Iterations of models were assessed at the location/year/age-group/sex level to determine whether data points merited exclusion via outliering. Unadjusted death estimates were adjusted using CoDCorrect to produce final estimates of YLLs. The estimates are limited by a paucity of data for regions such as Eastern and Central sub-Saharan Africa. The covariates used are displayed below.

| Level | Covariate                            | Direction |
|-------|--------------------------------------|-----------|
| 1     | Sanitation (proportion with access)  | –         |
| 2     | Education (years per capita)         | –         |
|       | Log LDI (\$I per capita)             | –         |
|       | Health care access and quality index | –         |
| 3     | Socio-demographic Index              | 0         |

Interstitial nephritis and urinary tract infections was a target cause for the Parkinson and Alzheimer disease mortality correction process whereby deaths due to causes closely associated with Parkinson and Alzheimer disease and other dementias were redistributed to Parkinson and Alzheimer disease and



other dementias in order to account for the common misclassification of deaths due to these neurological diseases. Detailed information on this process can be found in section 4 of the appendix.

# Urolithiasis

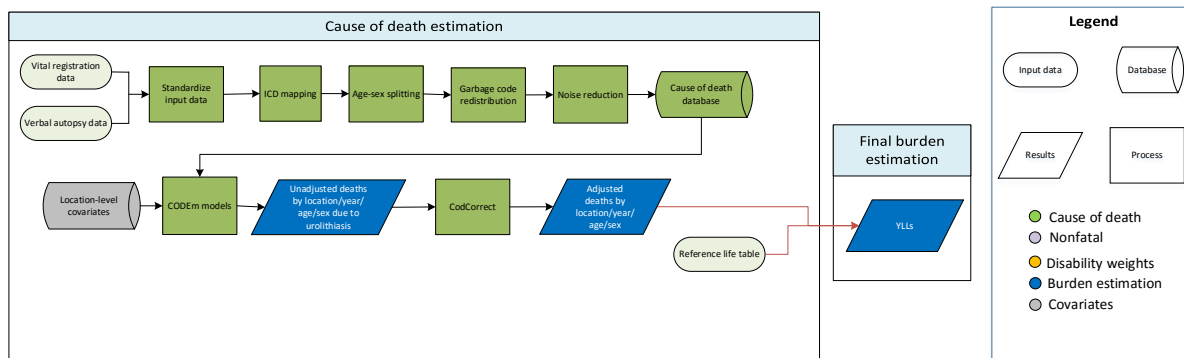

## Input data

Vital registration and verbal autopsy data were used to model mortality due to urolithiasis. Data were standardized and mapped according to the GBD causes of death ICD mapping method. These data were then age-sex split, and appropriate redistribution of garbage code data was performed. After applying noise reduction, these data were uploaded to the COD database. Outliers were identified by systematic examination of data points for all location-years. Data points that violated well-established age or time trends or that resulted in extremely high or low cause fractions were determined to be outliers.

## Modelling strategy

The estimation strategy used for fatal urolithiasis is largely similar to methods used in GBD 2015. A standard CODEm model including location-level covariates was used to model deaths due to urolithiasis. Age-restrictions for death estimations secondary to urolithiasis include 5 years for lower bound, 80+ for upper bound. Iterations of models were assessed at the location/year/age-group/sex level to determine whether data points merited exclusion via outliering. Unadjusted death estimates were adjusted using CoDCorrect to produce final estimates of YLLs. The estimates are limited by a paucity of data for regions such as Eastern and Central sub-Saharan Africa. The covariates used are displayed below.

| Level | Covariate                                 | Direction |
|-------|-------------------------------------------|-----------|
| 1     | Temperature (90 <sup>th</sup> percentile) | +         |
| 2     | Animal fat (kcal per capita)              | +         |
|       | Fruits (kcal per capita)                  | -         |
|       | Vegetables (kcal per capita)              | -         |
|       | Red meat (kcal per capita)                | +         |
|       | Health care access and quality index      | -         |
| 3     | Socio-demographic Index                   | 0         |
|       | Log LDI (\$I per capita)                  | -         |

## Other urinary diseases

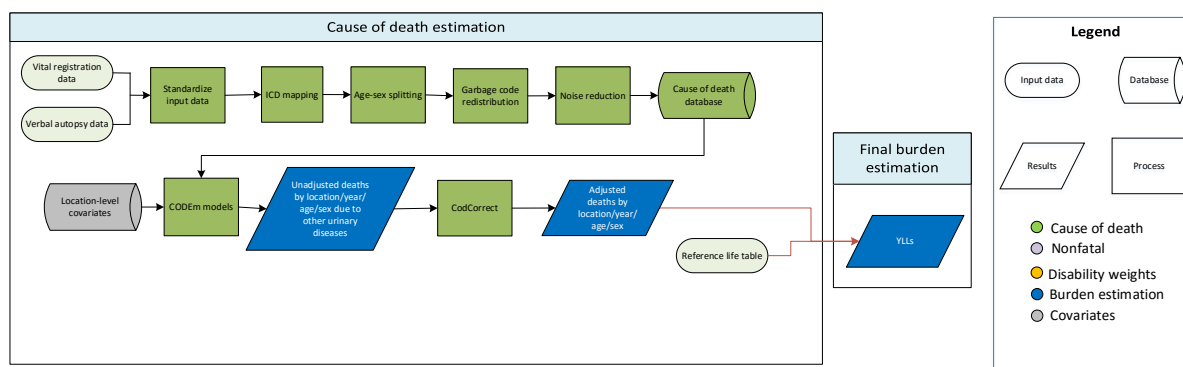

### Input data

Vital registration and verbal autopsy data were used to model mortality due to other urinary diseases. Data were standardized and mapped according to the GBD causes of death ICD mapping method. These data were then age-sex split, and appropriate redistribution of garbage code data was performed. After applying noise reduction, these data were uploaded to the COD database. Outliers were identified by systematic examination of data points for all location-years. Data points that violated well-established age or time trends or that resulted in extremely high or low cause fractions were determined to be outliers.

### Modelling strategy

The estimation strategy used for other urinary diseases is largely similar to methods used in GBD 2015. A standard CODEm model with location-level covariates was used to model deaths due to other urinary diseases. Age-restrictions for death estimations secondary to urinary diseases and male infertility include 0 days for lower bound, 95+ for upper bound. Iterations of models were assessed at the location/year/age-group/sex level to determine whether data points merited exclusion via outliering. Unadjusted death estimates were adjusted using CoDCorrect to produce final estimates of YLLs. The estimates are limited by a paucity of data for regions such as Eastern and Central sub-Saharan Africa. The covariates used are displayed below.

| Level | Covariate                            | Direction |
|-------|--------------------------------------|-----------|
| 1     | Mean BMI                             | +         |
| 2     | Education (years per capita)         | -         |
|       | Log LDI (\$I per capita)             | -         |
|       | Health care access and quality index | -         |
| 3     | Socio-demographic Index              | 0         |

## Gynaecological conditions

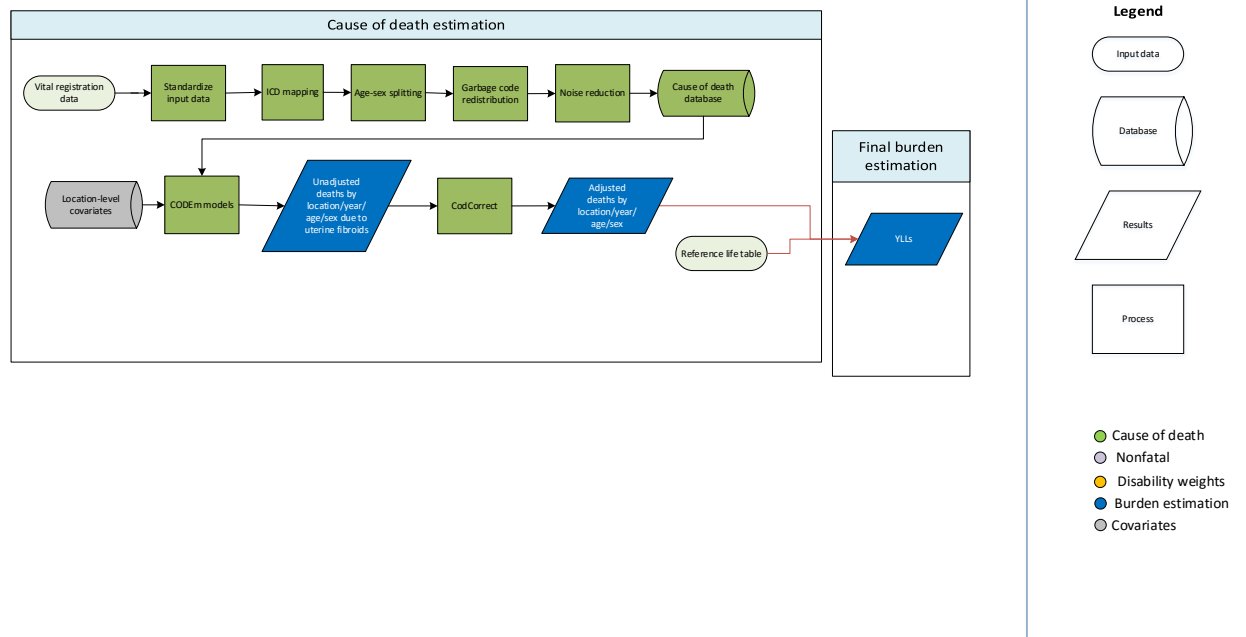

### Input data

For GBD 2016, vital registration data were used to estimate deaths for each of the five fatal gynaecological conditions, which include uterine fibroids, PCOS, endometriosis, genital prolapse, and other gynaecological conditions. These causes are sex-specific to women and we only model deaths among women. ICD9 and ICD10 codes for each are listed below. Data points were selected as outliers if they were implausibly high, low, or significantly conflicted with established age or temporal patterns.

### ICD10 and ICD9 codes used for gynecological disorders

| Model                         | ICD10 code       | ICD9 code               |
|-------------------------------|------------------|-------------------------|
| Uterine Fibroids              | D25-D26.9, D28.2 | 218-219.9, 236.0        |
| Endometriosis                 | N80-N80.9        | 617-617.9               |
| Genital Prolapse              | N81-N81.9        | 618-618.9               |
| Polycystic Ovarian Syndrome   | E28.2            | 256.4                   |
| Other Gynecological Disorders |                  | 621.4-622.7, 629-629.81 |

## Modelling strategy

For GBD 2016, we estimated mortality due to total of all gynaecological diseases as well as each of the sub-categories using CODEm. We assumed no deaths from premenstrual syndrome and primary infertility, which we model for nonfatal outcomes.

Continuing in GBD 2016, we have reassigned deaths due to leiomyomas and other benign uterine tumors to uterine fibroids.

| <b>Gynaecologic disorders</b> |                       |              |                  |
|-------------------------------|-----------------------|--------------|------------------|
| <b>Covariate</b>              | <b>Transformation</b> | <b>Level</b> | <b>Direction</b> |
| Education                     | None                  | 3            | -1               |
| LDI                           | Log                   | 3            | -1               |
| Percent Births in 35+         | None                  | 2            | 1                |
| Skilled Birth Attendance      | None                  | 2            | -1               |
| Smoking                       | None                  | 1            | 0                |
| Total Fertility Rate          | None                  | 2            | 1                |
| Health System Access          | None                  | 2            | -1               |
| SDI                           | None                  | 3            | -1               |
| HAQI                          | None                  | 2            | -1               |

## Haemoglobinopathies and hemolytic anaemias

This write-up covers the following sub-causes: Sickle cell disorders, thalassemias, glucose-6-phosphate dehydrogenase (G6PD) deficiency, and other haemoglobinopathies and hemolytic anaemias

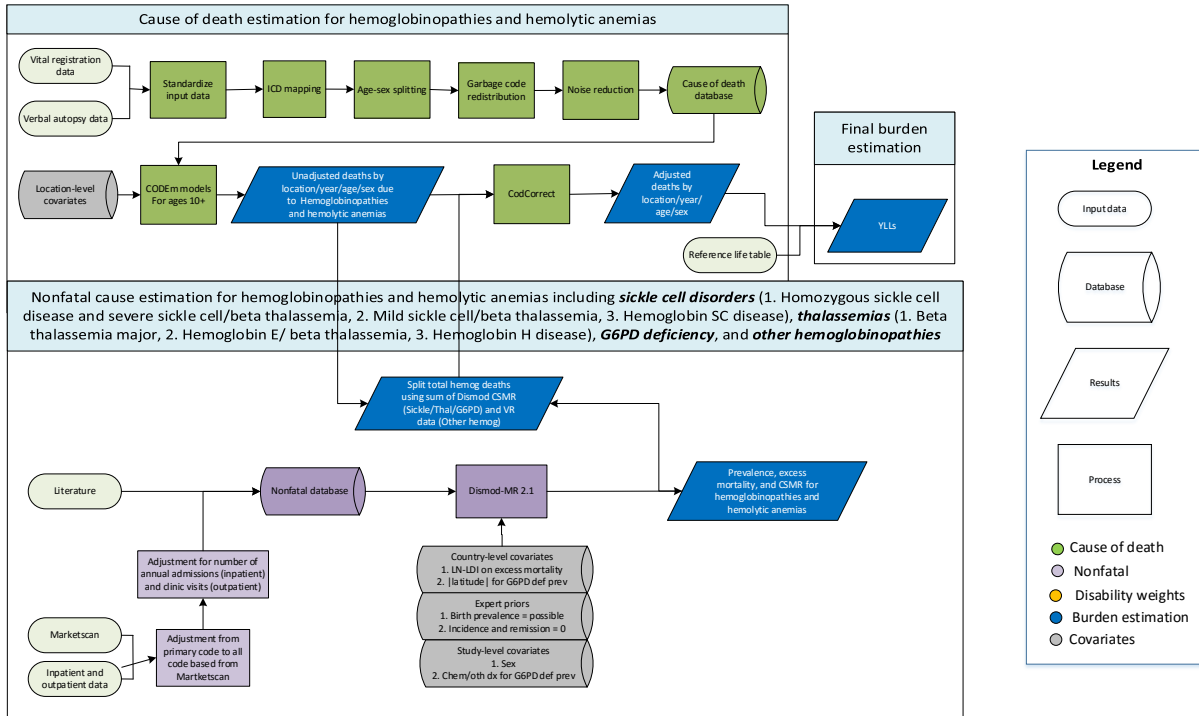

### Input data

For GBD 2016, the overall CODEm model for haemoglobinopathies and hemolytic anemias was informed by centrally prepped data stored in the cause of death (COD) database. All data from all geographies were reviewed. Outliers were identified as those data where age patterns or temporal patterns were inconsistent with neighbouring age groups or locations or where sparse data were predicting implausible overall temporal or age patterns for a given location.

DisMod-MR 2.2 was used to estimate sickle cell disorders, thalassemias, and G6PD deficiency age- and sex-specific prevalence and mortality for each location and year in the GBD. Three sources of data were used for DisMod-MR 2.2 models: Literature, Marketscan data, and ICD-9 & ICD-10 hospital data. Each datum for sickle cell disease models was used for one of three mutually exclusive conditions: 1) homozygous sickle cell disease and severe sickle cell/beta thalassaemia, 2) Mild sickle cell/beta thalassaemia, or 3) Hemoglobin SC disease. We similarly extracted data for thalassemias using three mutually exclusive disease states: 1) Beta thalassaemia major, 2) Hemoglobin E/beta thalassaemia, and 3) Hemoglobin H disease. G6PD deficiency was estimated as a single model. Cause-specific mortality rates for other haemoglobinopathies and hemolytic anemias, lacking more specific data, was assumed to be geographically uniform, but did vary by age and sex; the levels and trends were informed by analysis of VR data from the COD database.

We added data identified select geographies identified by GBD collaborators for GBD 2016. Our last comprehensive literature review was completed in GBD 2015, where we identified data on prevalence, excess-mortality rate, or with-condition mortality rate. Age-specific survival probabilities from cohort studies were converted to corresponding with-condition mortality rates. G6PD deficiency is an X-linked recessive genetic disease, and genetic homozygosity served as the reference definition for our DisMod-MR 2.1 models in 2015. This was a change from GBD 2013 when we quantified G6PD deficiency on reagent tests as the reference category. Second, we extracted ICD-9-coded MarketScan data from the United States, correcting for multiple admissions, primary vs. non-primary coding, and outpatient vs. inpatient visits as determined from patient linkage analysis. Third, we used ICD-9 and ICD-10 inpatient and outpatient hospital data from all those locations where it was available, applying correction factors from analysis of claims data. These included correction factors for multiple admissions, age- and sex-specific ratio of prevalence that would be derived from only using the primary discharge ICD code versus that derived from using any of the discharge diagnosis codes, also accounting for differences in geography-specific overall hospitalization rate when calculating the ratio. This is the most substantial change for GBD 2015 when a single ratio for all ages and both sexes was applied to the data. We applied this as a correction factor for those sources where only a single ICD code is given for each discharge. Of note, there were no hospital data available for haemoglobin E/beta-thalassemia, haemoglobin H disease, or G6PD deficiency. All prevalence data from MarketScan, hospital sources, and literature were uploaded to the nonfatal database.

### **Modelling strategy**

We completed seven separate DisMod-MR 2.2 models as listed above. Each used log-transformed lag-distributed income as a country-level covariate on excess mortality, which had the effect of predicting higher excess mortality in those locations with lower national income. The only study covariate used for most models was for sex. Genetic G6PD deficiency is far more common in males, but for all others the male to female ratio is nearly equivalent. Our G6PD deficiency model included additional study covariates to crosswalk from non-genetic diagnostic tests (eg, chemical reagent testing) back to the reference definition. Incidence and remission were both set to be zero.

We completed data-rich (DR) and global CODEm models for males and females separately. The sum of CSMR from all seven DisMod-MR 2.2 models was used as a predictive covariate for CODEm model development. CODEm results were then split between sickle cell disorders, thalassemias, G6PD deficiency, and other haemoglobinopathies and hemolytic anaemias using summed and scaled CSMR outputs from the same models. Other haemoglobinopathies and hemolytic anaemias did not have a separate DisMod-MR 2.2 model, but was instead informed by location-specific VR data.

The primary limitation of our estimation is data availability. We elected a hybrid approach of CODEm and DisMod-MR 2.2 to improve the quality of estimates in data-poor locations, but in most of these locations data are still relatively sparse for nonfatal models, which leads to relatively large uncertainty. Further adding to the uncertainty is the fact that haemoglobinopathies dramatically increase the risk of mortality due to infectious agents such as malaria, lower respiratory infections, and diarrhea, as well as increasing the risk of maternal mortality. In locations with poor diagnostic capabilities and high infectious burden, it is thus very plausible that mortality due to haemoglobinopathies may be even higher. Secondly, our specification of seven distinct entities for DisMod-MR 2.1 models does not align perfectly with the cause categories in the central COD prep, which limits the extent to which CSMR data

from the COD database can inform nonfatal models. We will continue to work to expand our dataset and consolidate the GBD analysis of haemoglobinopathies going forward.

**Selected Covariates in parent CODEm model**

| <b>Covariate</b>                                                                                             | <b>Transformation</b> | <b>Level</b> | <b>Direction</b> |
|--------------------------------------------------------------------------------------------------------------|-----------------------|--------------|------------------|
| Education                                                                                                    | None                  | 3            | -1               |
| LDI                                                                                                          | Log                   | 3            | -1               |
| Hemoglobinopathies (sum of prevalence * excess-mortality from all DisMod models)                             | None                  | 1            | 1                |
| Sickle Cell & Thal (sum of prevalence * excess-mortality from all DisMod models – excluding G6PD deficiency) | None                  | 1            | 1                |
| SDI                                                                                                          | None                  | 3            | -1               |
| HAQI                                                                                                         | None                  | 2            | -1               |
| Health System Access, Capped                                                                                 | None                  | 2            | -1               |



## Endocrine, Blood, Metabolic, and Immune Disorders

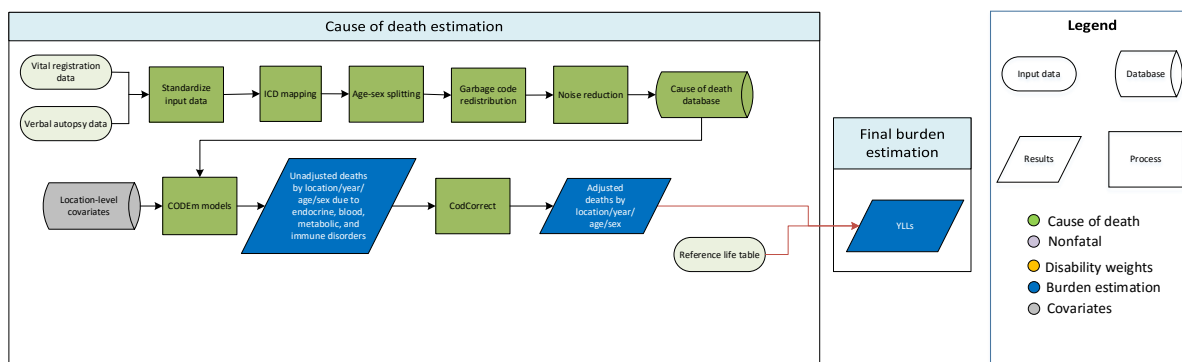

### Input data

Vital registration and verbal autopsy data were used to model mortality due to endocrine, blood, metabolic, and immune disorders. Data were standardized and mapped according to the GBD causes of death ICD mapping method. These data were then age-sex split, and appropriate redistribution of garbage code data was performed. After applying noise reduction, these data were uploaded to the COD database. Outliers were identified by systematic examination of data points for all location-years. Data points that violated well-established age or time trends or that resulted in extremely high or low cause fractions were determined to be outliers.

### Modelling strategy

The estimation strategy used for fatal endocrine, blood, metabolic, and immune disorders is largely similar to methods used in GBD 2015. A standard CODEm model with location-level covariates was used to model deaths due to endocrine, blood, metabolic, and immune disorders. Iterations of models were assessed at the location/year/age-group/sex level to determine whether data points merited exclusion via outliering. Unadjusted death estimates were adjusted using CoDCorrect to produce final estimates of YLLs. The covariates used are displayed below.

| Level | Covariate                            | Direction |
|-------|--------------------------------------|-----------|
| 1     | Mean BMI                             | +         |
| 2     | Animal fat (kcal per capita)         | +         |
|       | Alcohol (litres per capita)          | +         |
|       | Total calories (kcal per capita)     | +         |
|       | Mean cholesterol                     | +         |
|       | Health care access and quality index | -         |
| 3     | Socio-demographic Index              | 0         |
|       | Log LDI (\$I per capita)             | -         |
|       | Education (years per capita)         | -         |

## Musculoskeletal disorders

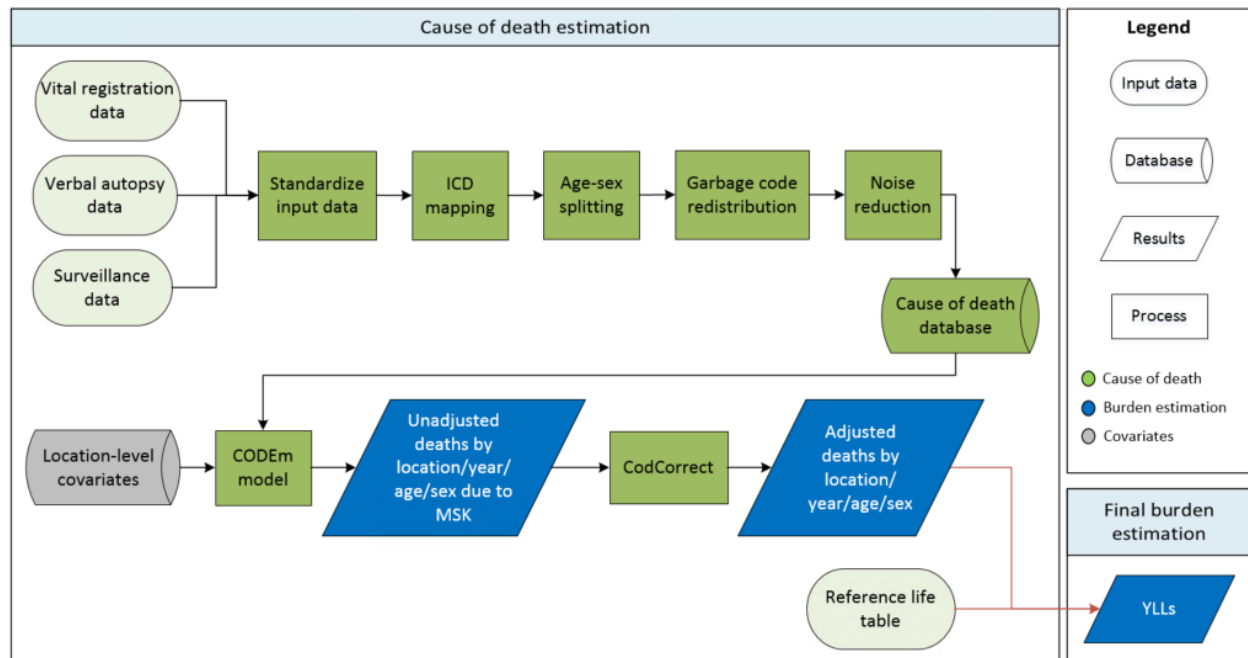

### Input data

Data used to estimate mortality from musculoskeletal disorders (MSK) included vital registration (VR), verbal autopsy (VA), and China disease surveillance point data from the cause of death (COD) database. Our outlier criteria excluded data points that were implausibly high or low relative to global or regional patterns, substantially conflicted with established age or temporal patterns, or significantly conflicted with other data sources based from the same locations or locations with similar characteristics (ie, Socio-demographic Index).

Based on these criteria, in GBD 2016 we excluded VA data from Bangladesh, Vietnam, South Africa, Burkina Faso, Ghana, and all countries in Eastern sub-Saharan Africa including Ethiopia, Kenya, Tanzania, Mozambique, and Zambia, as VA tools have poor validity in identifying MSK deaths. In India, the number of deaths from new Sample Registration System (SRS) data in urban parts of states was substantially higher than the number of deaths from Medical Certification of Cause of Death (MCCD) data. In rural India, the SRS data are the only source. We have outliered the MCCD data to make the models follow the SRS data. This does lead to higher estimates in India compared to other parts of the world. For Indonesia, we excluded mortality surveillance data from a few states with high estimates based on small numbers, ie, Kalimantan Selatan and Kalimantan Timur in males, and Maluku in females. We re-included VR from Zimbabwe and Limpopo state in South Africa, where the older age groups had been excluded in GBD 2015. Recent years of data from Kazakhstan (2013-2015) were outliered as they presented a discontinuity with previous years which has been ascribed to the country's attempt to reduce deaths due to CVD leading to an increase of deaths ICD9-BTL data from Latin American countries (Ecuador, Costa Rica, El Salvador, Guatemala, Honduras, Nicaragua, Panama, Venezuela, Antigua and Barbuda, The Bahamas, Barbados, Belize, Bermuda, Cuba, Dominica, Grenada, Guyana, Jamaica, Saint Lucia, Saint Vincent and Grenadines, Suriname and Trinidad and Tobago). The data from these countries provided in ICD9-detail or ICD10 were kept in the analysis.

## Modelling strategy

The standard CODEm modelling approach was applied to estimate deaths due to musculoskeletal disorders. We applied the same covariates used in GBD 2015, excluding the four covariates for proportions of population at 0–15, 15–30, 30–45, and 45 and over latitudes, which had no observable benefit to the model. We modified the vegetable intake covariate from kcal/day to grams/day. Otherwise, there were no changes from the GBD 2015 modelling strategy.

Covariates are shown in the following table.

| Level | Covariate                                                   | Direction |
|-------|-------------------------------------------------------------|-----------|
| 1     | BMI (mean per capita)                                       | +         |
| 2     | Alcohol consumption (litres per capita)                     | +         |
|       | Cumulative cigarettes (10 years)                            | +         |
|       | Cumulative cigarettes (5 years)                             | +         |
|       | Smoking prevalence                                          | +         |
|       | Cholesterol (mean per capita)                               | +         |
|       | Vegetable consumption (g per capita)                        | 0         |
|       | Education (years per capita)                                | 0         |
|       | Log-transformed LDI: lag-distributed income (\$ per capita) | 0         |
|       | Health care access and quality index                        | -         |
| 3     | SDI: Socio-demographic Index                                | 0         |

## Rheumatoid arthritis

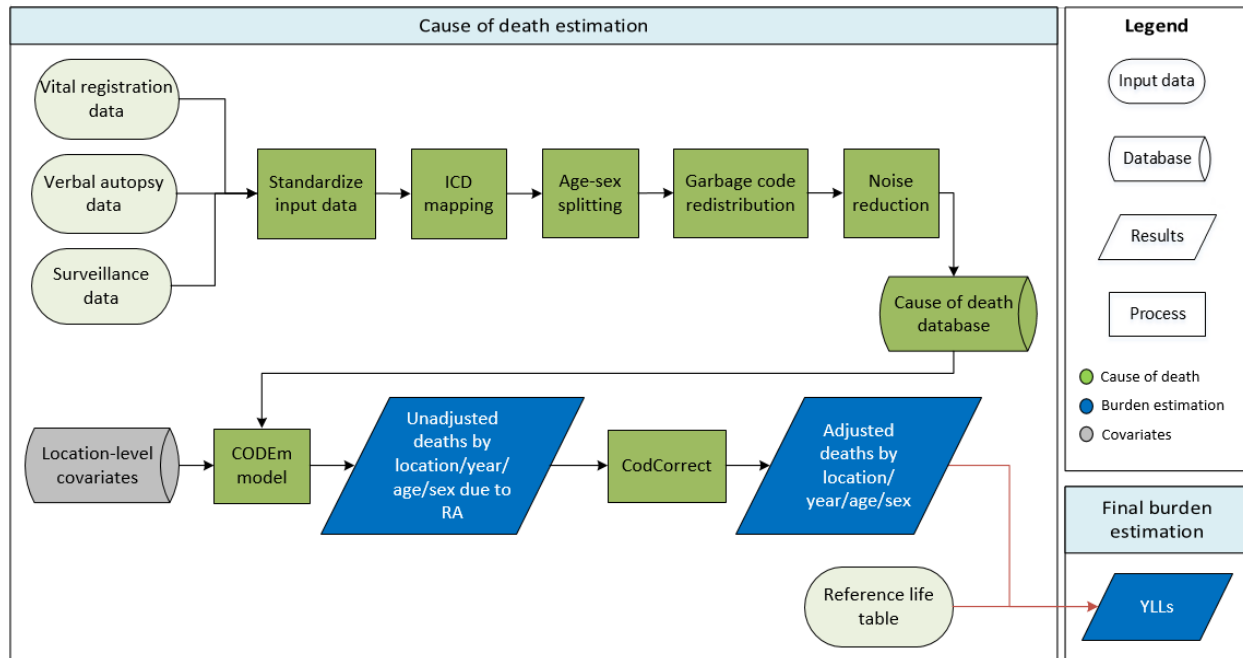

### Input data

Data used to estimate rheumatoid arthritis mortality included vital registration, verbal autopsy, and China disease surveillance data from the cause of death database. Our outlier criteria were to exclude data points that were (1) implausibly high or low relative to global or regional patterns, (2) substantially conflicted with established age or temporal patterns, or (3) significantly conflicted with other data sources based from the same locations or locations with similar characteristics (ie, Socio-demographic Index).

Based on these criteria, we excluded a few data points from China. For males, we outliered data points from all sources in Tibet and data points from China disease surveillance in 1991 in all states, as these led to disproportionately high estimates. For females, we outliered Tibet data points from all sources up to 2007 and China disease surveillance data points in several southern states, ie, Guangxi, Hainan, and Yunnan. In addition, as the vital registration data in Limpopo for both male and female in year 2003 and before are implausibly higher than the other provinces in South Africa, we outliered this data source and kept the data in year 2004-2014 in the analysis. Also, as the vital registration data of mid-age males in Greenland are unrealistically high and much higher than e.g., in Canada and Denmark, the data for males age 45 and above were outliered. Recent years of data from Kazakhstan (2013-2015) were outliered as they presented a discontinuity with previous years which has been ascribed to the country's attempt to reduce deaths due to CVD leading to an increase of deaths from all other causes including rheumatoid arthritis. . Lastly, we outliered ICD9-BTL data from Latin American countries(Ecuador, Costa Rica, El Salvador, Guatemala, Honduras, Nicaragua, Panama, Venezuela, Antigua and Barbuda, The Bahamas, Barbados, Belize, Bermuda, Cuba, Dominica, Grenada, Guyana, Jamaica, Saint Lucia, Saint

Vincent and Grenadines, Suriname and Trinidad and Tobago). The data from these countries in the year that used ICD10 were kept in the analysis.

### Modelling strategy

The standard CODEm modelling approach was applied to estimate deaths due to rheumatoid arthritis. We applied the same covariates used in GBD 2015 but excluded the four covariates for proportions of population at 0-15, 15-30, 30-45, and 45 and over latitudes, which had no observable benefit to the model. We modified the vegetable covariate from kcal/day to gram/day. Otherwise, there were no changes from the GBD 2015 modelling strategy. All the covariates are shown in the following table.

| Level | Covariate                                                   | Direction |
|-------|-------------------------------------------------------------|-----------|
| 1     | Alcohol consumption (litres per capita)                     | +         |
|       | Cumulative cigarettes (10 years)                            | +         |
|       | Cumulative cigarettes (5 years)                             | +         |
|       | Smoking prevalence                                          | +         |
|       | Health care access and quality index                        | -         |
| 2     | Cholesterol (mean per capita)                               | +         |
|       | Vegetable consumption (g per capita)                        | 0         |
| 3     | BMI (mean per capita)                                       | +         |
|       | SDI: Socio-demographic Index                                | 0         |
|       | Log-transformed LDI: lag-distributed income (\$ per capita) | -         |
|       | Education (years per capita)                                | -         |

## Other musculoskeletal disorders

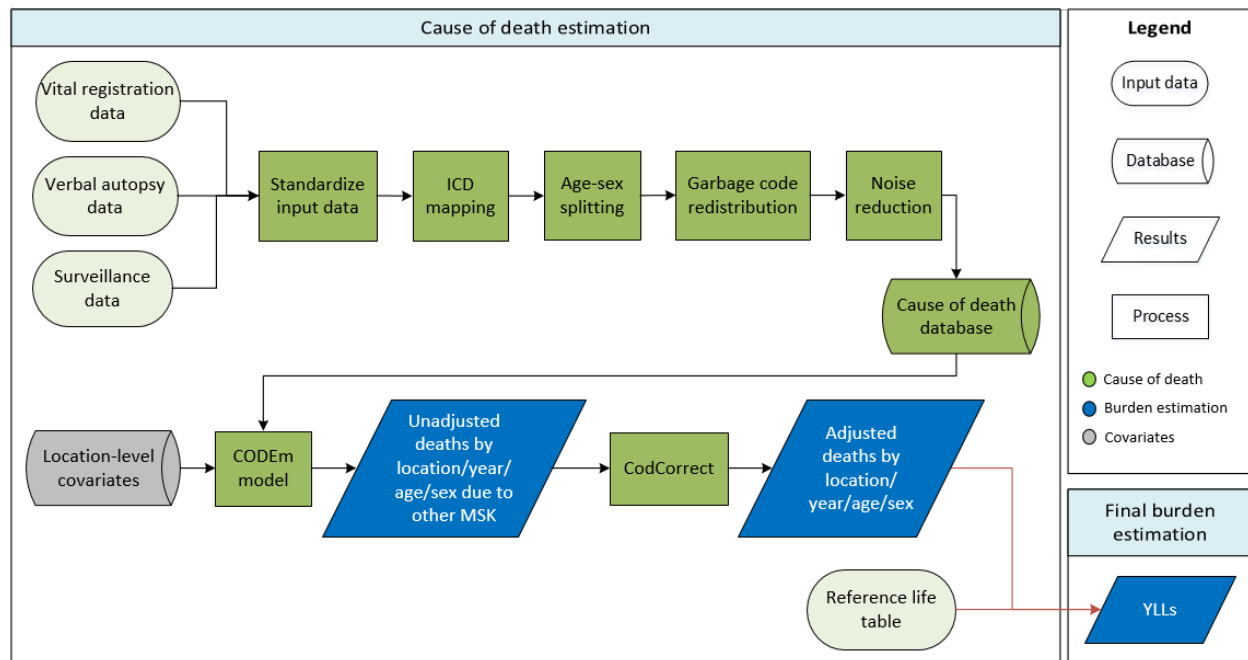

### Input data

Data used to estimate mortality of other musculoskeletal disorders (MSK) included vital registration, verbal autopsy (VA), and China disease surveillance point data from the cause of death database. Our outlier criteria excluded data points that were implausibly high or low relative to global or regional patterns, substantially conflicted with established age or temporal patterns, or significantly conflicted with other data sources based from the same locations or locations with similar characteristics (i.e., socio-demographic index).

Based on these criteria, we excluded VA studies from Eastern and Western sub-Saharan Africa, as VA studies cannot distinguish other MSK deaths and estimates for the regions were disproportionately high. Recent years of data from Kazakhstan (2013–2015) were outliered as they presented a discontinuity with previous years which has been ascribed to the country's attempt to reduce deaths from CVD leading to an increase of deaths from all other causes, including other MSK. We also outliered all data in Latin American countries (Ecuador, Costa Rica, El Salvador, Guatemala, Honduras, Nicaragua, Panama, Venezuela, Antigua and Barbuda, The Bahamas, Barbados, Belize, Bermuda, Cuba, Dominica, Grenada, Guyana, Jamaica, Saint Lucia, Saint Vincent and Grenadines, Suriname and Trinidad and Tobago). The data from these countries in the year that used ICD9-detail or ICD10 were kept in the analysis.

### Modelling strategy

The standard CODEm modelling approach was applied to estimate deaths due to other musculoskeletal disorders. We applied the same covariates used in GBD 2015, excluding the four covariates for proportions of population at 0–15, 15–30, 30–45, and 45 and over latitudes, which had no observable benefit to the model. We modified the vegetable intake covariate from kcal/day to grams/day.

Otherwise, there were no changes from the GBD 2015 modelling strategy. Covariates are shown in the following table.

| Level | Covariate                                                   | Direction |
|-------|-------------------------------------------------------------|-----------|
| 1     | BMI (mean per capita)                                       | +         |
| 2     | Alcohol consumption (litres per capita)                     | +         |
|       | Cumulative cigarettes (10 years)                            | +         |
|       | Cumulative cigarettes (5 years)                             | +         |
|       | Smoking prevalence                                          | +         |
|       | Cholesterol (mean per capita)                               | +         |
|       | Vegetable consumption (g per capita)                        | 0         |
|       | Education (years per capita)                                | 0         |
|       | Log-transformed LDI: lag-distributed income (\$ per capita) | 0         |
|       | Health care access and quality index                        | -         |
| 3     | SDI: Socio-demographic Index                                | 0         |

**Congenital Birth Defects:** *Neural tube defects, Congenital heart anomalies, Orofacial clefts, Down Syndrome, Turner syndrome, Klinefelter syndrome, Other chromosomal disorders, Congenital musculoskeletal anomalies, Urogenital congenital anomalies, Digestive congenital anomalies, and Other congenital birth defects.*

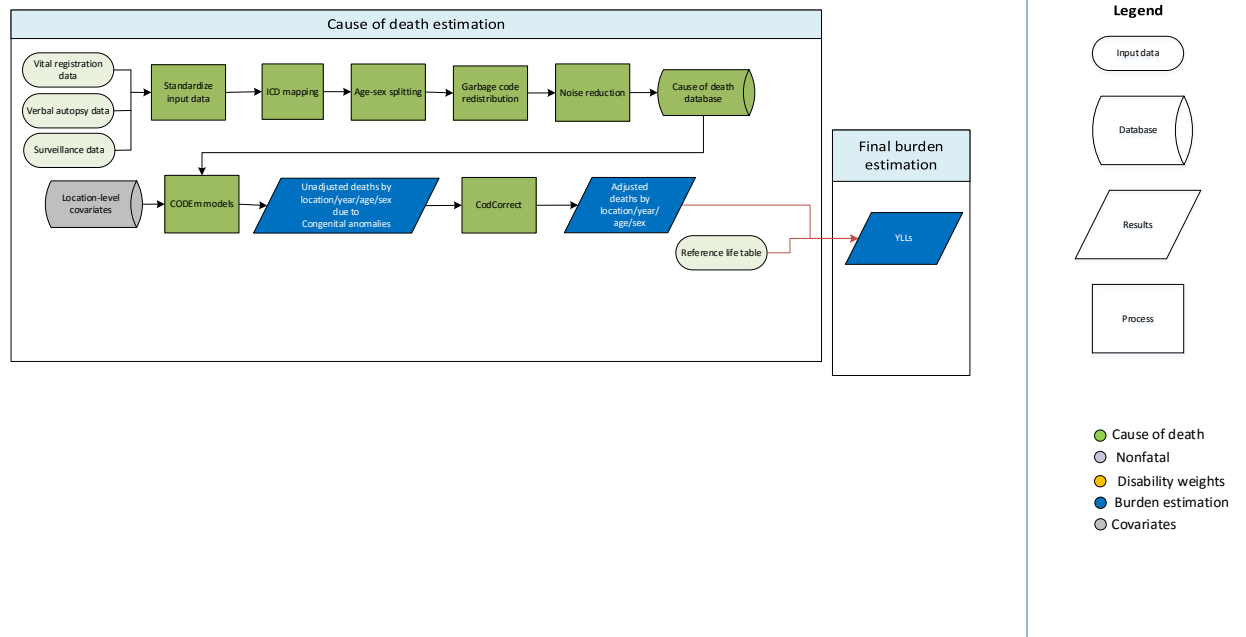

## Input data

For GBD 2016, input data for estimating mortality due to congenital anomalies was centrally extracted, processed, and stored in causes of death (CoD) database. Vital registration (VR) was the dominant data type, followed by verbal autopsy (VA) and surveillance. Those CoD data sources that specified the sub-cause of birth defect were included in estimation of both the parent congenital anomalies model as well as in sub-type-specific models.

For GBD 2016, data exclusions were limited. We outliered all VA data in those over 5 years old as the age patterns were unreliable and led to poor model performance in the under-5 age groups. We also excluded some data sources from the parent model where only a subset of sub-causes were specified (eg, congenital heart disease, neural tube defects, and other congenital anomalies) and the sum of the sub-causes clearly represented systematic underreporting of one of the sub-causes. Systematic underreporting was suspected when sex- and age-specific rates were more than an order of magnitude lower than neighboring or comparable locations. Data sources for those locations were still included by default for sub-cause specific models because under-reporting of the total was not assumed to necessarily be associated with under-reporting of all of the component conditions.



## Modeling strategy

All types of congenital anomalies were estimated using cause of death ensemble modeling (CODEm) for GBD 2016, as was done for previous iterations of the GBD study. Specific causes included neural tube defects, congenital heart anomalies, orofacial clefts, Down Syndrome, other chromosomal anomalies, congenital musculoskeletal anomalies, urogenital congenital anomalies, digestive congenital anomalies, and other congenital birth defects. We assumed no mortality from either Klinefelter syndrome or Turner syndrome, for which we model nonfatal outcomes only. For GBD 2016, we modeled congenital anomalies as a cause of death for ages 0-69 years only, assuming that all mortality from congenital conditions occurs before age 70 years of age.

For GBD 2016, we added three new causes to the congenital anomalies: congenital musculoskeletal and limb anomalies; urogenital congenital anomalies; and digestive congenital anomalies.

## Covariates selected for CODEm model of overall congenital birth defects

| Covariate                                                  | Transformation | Level | Direction     |
|------------------------------------------------------------|----------------|-------|---------------|
| Maternal alcohol consumption during pregnancy (proportion) | None           | 1     | Positive      |
| In-Facility Delivery (proportion)                          | None           | 1     | Negative      |
| Live Births 35+ (proportion)                               | None           | 1     | Positive      |
| Folic acid unadjusted (ug)                                 | None           | 1     | Negative      |
| Legality of Abortion                                       | None           | 2     | Negative      |
| Antenatal Care (1 visit) Coverage (proportion)             | None           | 2     | Not specified |
| Smoking Prevalence (Reproductive Age Standardized)         | None           | 2     | Positive      |
| Antenatal Care (4 visits) Coverage (proportion)            | None           | 2     | Negative      |
| Healthcare access and quality index                        | None           | 2     | Negative      |
| Education (years per capita)                               | None           | 2     | Negative      |
| Alcohol (liters per capita)                                | None           | 3     | Positive      |
| fruits unadjusted(g)                                       | None           | 3     | Positive      |
| Outdoor Air Pollution (PM2.5)                              | None           | 3     | Positive      |
| Indoor Air Pollution (All Cooking Fuels)                   | None           | 3     | Positive      |
| Socio-demographic Index                                    | None           | 3     | Negative      |
| vegetables unadjusted(g)                                   | None           | 3     | Positive      |

## Covariates selected for CODEm model of neural tube defects

| Covariate                           | Transformation | Level | Direction |
|-------------------------------------|----------------|-------|-----------|
| Health System Access (capped)       | None           | 1     | Negative  |
| fruits adjusted(g)                  | None           | 2     | Negative  |
| vegetables adjusted(g)              | None           | 2     | Negative  |
| Healthcare access and quality index | None           | 2     | Negative  |
| Education (years per capita)        | None           | 3     | Negative  |
| LDI (I\$ per capita)                | Log            | 3     | Negative  |

|                         |      |   |          |
|-------------------------|------|---|----------|
| Socio-demographic Index | None | 3 | Negative |
|-------------------------|------|---|----------|

#### Covariates selected for CODEm model of congenital heart anomalies

| Covariate                                                  | Transformation | Level | Direction |
|------------------------------------------------------------|----------------|-------|-----------|
| Maternal alcohol consumption during pregnancy (proportion) | None           | 1     | Positive  |
| Socio-demographic Index                                    | Log            | 2     | Negative  |
| Smoking Prevalence (Reproductive Age Standardized)         | None           | 2     | Positive  |
| Diabetes Age-Standardized Prevalence (proportion)          | None           | 2     | Positive  |
| Healthcare access and quality index                        | None           | 2     | Negative  |
| Legality of Abortion                                       | None           | 2     | Negative  |
| Antenatal Care (1 visit) Coverage (proportion)             | None           | 2     | Negative  |
| In-Facility Delivery (proportion)                          | None           | 2     | Negative  |
| Education (years per capita)                               | None           | 2     | Negative  |
| Alcohol (liters per capita)                                | None           | 3     | Positive  |
| Antenatal Care (4 visits) Coverage (proportion)            | None           | 3     | Negative  |
| Skilled Birth Attendance (proportion)                      | None           | 3     | Negative  |
| Live Births 35+ (proportion)                               | None           | 3     | Positive  |

#### Covariates selected for CODEm model of cleft lip and cleft palate

| Covariate                                                  | Transformation | Level | Direction     |
|------------------------------------------------------------|----------------|-------|---------------|
| Indoor Air Pollution (All Cooking Fuels)                   | None           | 1     | Positive      |
| Diabetes Age-Standardized Prevalence (proportion)          | None           | 2     | Positive      |
| Maternal alcohol consumption during pregnancy (proportion) | None           | 2     | Positive      |
| Healthcare access and quality index                        | None           | 2     | Negative      |
| Outdoor Air Pollution (PM2.5)                              | None           | 2     | Positive      |
| Legality of Abortion                                       | None           | 2     | Negative      |
| Skilled Birth Attendance (proportion)                      | None           | 2     | Negative      |
| Smoking Prevalence (Reproductive Age Standardized)         | None           | 2     | Positive      |
| vegetables unadjusted(g)                                   | None           | 3     | Not specified |
| Alcohol (liters per capita)                                | None           | 3     | Positive      |
| Antenatal Care (4 visits) Coverage (proportion)            | None           | 3     | Negative      |
| Education (years per capita)                               | None           | 3     | Negative      |
| fruits unadjusted(g)                                       | None           | 3     | Not specified |
| Antenatal Care (1 visit) Coverage (proportion)             | None           | 3     | Negative      |

### Covariates selected for CODEm model of Down Syndrome

| Covariate                                                  | Transformation | Level | Direction |
|------------------------------------------------------------|----------------|-------|-----------|
| Live Births 35+ (proportion)                               | None           | 1     | Positive  |
| Legality of Abortion                                       | None           | 1     | Negative  |
| Live Births 40+ (proportion)                               | None           | 1     | Positive  |
| Socio-demographic Index                                    | None           | 2     | Negative  |
| LDI (I\$ per capita)                                       | Log            | 2     | Negative  |
| In-Facility Delivery (proportion)                          | None           | 2     | Negative  |
| Healthcare access and quality index                        | None           | 2     | Negative  |
| Maternal alcohol consumption during pregnancy (proportion) | None           | 3     | Positive  |
| Antenatal Care (1 visit) Coverage (proportion)             | None           | 3     | Negative  |
| Education (years per capita)                               | None           | 3     | Negative  |
| Indoor Air Pollution (All Cooking Fuels)                   | None           | 3     | Positive  |
| Antenatal Care (4 visits) Coverage (proportion)            | None           | 3     | Negative  |
| vegetables unadjusted(g)                                   | None           | 3     | Negative  |
| Smoking Prevalence (Reproductive Age Standardized)         | None           | 3     | Positive  |

### Covariates selected for CODEm model of other chromosomal abnormalities

| Covariate                                                  | Transformation | Level | Direction     |
|------------------------------------------------------------|----------------|-------|---------------|
| Live Births 35+ (proportion)                               | None           | 1     | Positive      |
| Live Births 40+ (proportion)                               | None           | 1     | Positive      |
| Legality of Abortion                                       | None           | 1     | Negative      |
| LDI (I\$ per capita)                                       | Log            | 2     | Negative      |
| Healthcare access and quality index                        | None           | 2     | Negative      |
| Antenatal Care (4 visits) Coverage (proportion)            | None           | 2     | Negative      |
| Antenatal Care (1 visit) Coverage (proportion)             | None           | 2     | Negative      |
| In-Facility Delivery (proportion)                          | None           | 2     | Negative      |
| Maternal alcohol consumption during pregnancy (proportion) | None           | 2     | Positive      |
| Socio-demographic Index                                    | None           | 3     | Not specified |
| Alcohol (liters per capita)                                | None           | 3     | Positive      |
| Smoking Prevalence (Reproductive Age Standardized)         | None           | 3     | Positive      |
| Education (years per capita)                               | None           | 3     | Negative      |
| Skilled Birth Attendance (proportion)                      | None           | 3     | Negative      |

### Covariates selected for CODEm model of congenital musculoskeletal and limb anomalies

| Covariate                                                  | Transformation | Level | Direction |
|------------------------------------------------------------|----------------|-------|-----------|
| Maternal alcohol consumption during pregnancy (proportion) | None           | 1     | Positive  |
| Legality of Abortion                                       | None           | 1     | Negative  |
| In-Facility Delivery (proportion)                          | None           | 2     | Negative  |
| Diabetes Age-Standardized Prevalence (proportion)          | None           | 2     | Positive  |
| Socio-demographic Index                                    | None           | 2     | Negative  |
| Healthcare access and quality index                        | None           | 2     | Negative  |
| Indoor Air Pollution (All Cooking Fuels)                   | None           | 2     | Positive  |

|                                                    |      |   |               |
|----------------------------------------------------|------|---|---------------|
| Smoking Prevalence (Reproductive Age Standardized) | None | 2 | Positive      |
| Antenatal Care (4 visits) Coverage (proportion)    | None | 3 | Negative      |
| Alcohol (liters per capita)                        | None | 3 | Positive      |
| vegetables unadjusted(g)                           | None | 3 | Not specified |
| fruits unadjusted(g)                               | None | 3 | Not specified |
| Education (years per capita)                       | None | 3 | Negative      |
| Antenatal Care (1 visit) Coverage (proportion)     | None | 3 | Negative      |

#### Covariates selected for CODEm model of urogenital congenital anomalies

| Covariate                                                  | Transformation | Level | Direction |
|------------------------------------------------------------|----------------|-------|-----------|
| Smoking Prevalence (Reproductive Age Standardized)         | None           | 1     | Positive  |
| Maternal alcohol consumption during pregnancy (proportion) | None           | 1     | Positive  |
| Healthcare access and quality index                        | None           | 2     | Negative  |
| Diabetes Age-Standardized Prevalence (proportion)          | None           | 2     | Positive  |
| Socio-demographic Index                                    | None           | 2     | Negative  |
| Outdoor Air Pollution (PM2.5)                              | None           | 2     | Positive  |
| In-Facility Delivery (proportion)                          | None           | 2     | Negative  |
| Indoor Air Pollution (All Cooking Fuels)                   | None           | 2     | Positive  |
| Antenatal Care (1 visit) Coverage (proportion)             | None           | 3     | Negative  |
| Alcohol (liters per capita)                                | None           | 3     | Positive  |
| Education (years per capita)                               | None           | 3     | Negative  |
| LDI (I\$ per capita)                                       | Log            | 3     | Negative  |
| Antenatal Care (4 visits) Coverage (proportion)            | None           | 3     | Negative  |

#### Covariates selected for CODEm model of digestive congenital anomalies

| Covariate                                                  | Transformation | Level | Direction     |
|------------------------------------------------------------|----------------|-------|---------------|
| Maternal alcohol consumption during pregnancy (proportion) | None           | 1     | Positive      |
| Smoking Prevalence (Reproductive Age Standardized)         | None           | 1     | Positive      |
| Indoor Air Pollution (All Cooking Fuels)                   | None           | 2     | Positive      |
| Diabetes Age-Standardized Prevalence (proportion)          | None           | 2     | Positive      |
| Socio-demographic Index                                    | None           | 2     | Negative      |
| Prevalence of obesity (age-standardized)                   | None           | 2     | Positive      |
| In-Facility Delivery (proportion)                          | None           | 2     | Negative      |
| Healthcare access and quality index                        | None           | 2     | Negative      |
| Alcohol (liters per capita)                                | None           | 3     | Positive      |
| Health System Access (capped)                              | None           | 3     | Negative      |
| Education (years per capita)                               | None           | 3     | Negative      |
| vegetables unadjusted(g)                                   | None           | 3     | Not specified |
| Antenatal Care (1 visit) Coverage (proportion)             | None           | 3     | Negative      |
| Antenatal Care (4 visits) Coverage (proportion)            | None           | 3     | Negative      |
| fruits unadjusted(g)                                       | None           | 3     | Not specified |
| LDI (I\$ per capita)                                       | Log            | 3     | Negative      |

**Covariates selected for CODEm model of other congenital birth defects**

| <b>Covariate</b>                                           | <b>Transformation</b> | <b>Level</b> | <b>Direction</b> |
|------------------------------------------------------------|-----------------------|--------------|------------------|
| Maternal alcohol consumption during pregnancy (proportion) | None                  | 1            | Positive         |
| Live Births 35+ (proportion)                               | None                  | 1            | Positive         |
| Education (years per capita)                               | None                  | 2            | Negative         |
| Smoking Prevalence (Reproductive Age Standardized)         | None                  | 2            | Positive         |
| Legality of Abortion                                       | None                  | 2            | Negative         |
| In-Facility Delivery (proportion)                          | None                  | 2            | Negative         |
| Indoor Air Pollution (All Cooking Fuels)                   | None                  | 2            | Positive         |
| Healthcare access and quality index                        | None                  | 2            | Negative         |
| Antenatal Care (1 visit) Coverage (proportion)             | None                  | 3            | Negative         |
| Diabetes Age-Standardized Prevalence (proportion)          | None                  | 3            | Positive         |
| LDI (I\$ per capita)                                       | Log                   | 3            | Negative         |
| Socio-demographic Index                                    | None                  | 3            | Negative         |
| Antenatal Care (4 visits) Coverage (proportion)            | None                  | 3            | Negative         |
| Alcohol (liters per capita)                                | None                  | 3            | Positive         |

## Skin and subcutaneous diseases

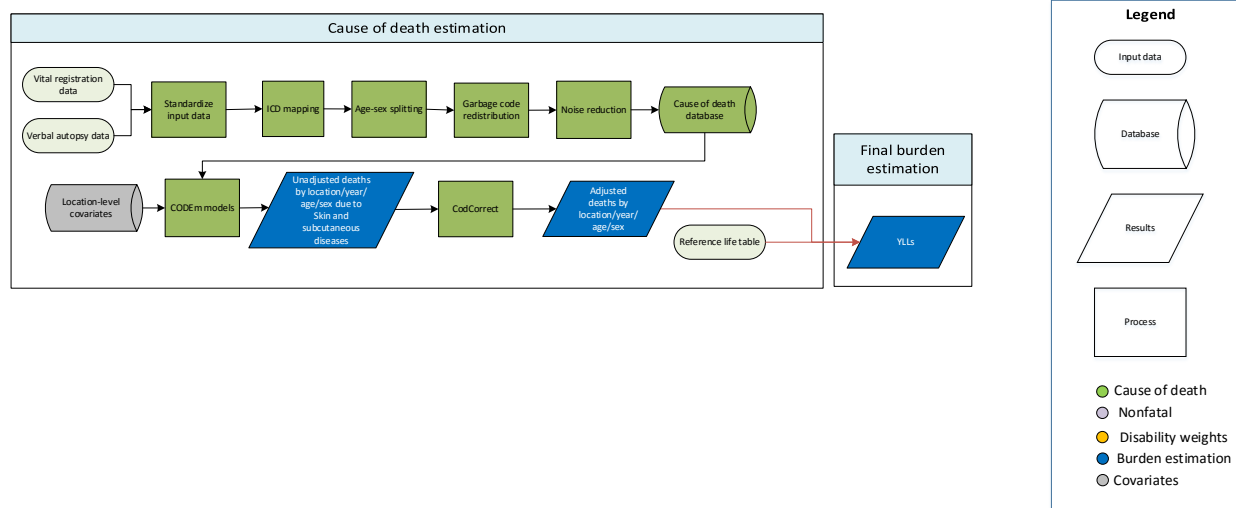

### Input data

Data used to estimate mortality of skin and subcutaneous diseases consisted of vital registration data and verbal autopsy data from the cause of death (COD) database. Outlier criteria excluded data points that were implausibly high or low relative to global or regional patterns and data from countries with small populations. The data in skin and subcutaneous diseases consists of aggregated data from all other specific skin diseases, as well as unique data points from unspecified codes of skin and subcutaneous disease.

### Modelling strategy

We modelled deaths due to skin and subcutaneous diseases with a standard CODEm model using the cause of death database and location-level covariates as inputs. The model followed standard parameters, with the exception that the start age of the model was 28 days instead of 0. We hybridized separate global and data-rich models to acquire unadjusted results, which we finalized and adjusted using CodCorrect to reach final years of life lost (YLLs) due to skin and subcutaneous diseases. In GBD 2016 we added the healthcare access and quality index (HAQI) covariate to the model.

| Covariate                                      | Level | Direction |
|------------------------------------------------|-------|-----------|
| Alcohol (liters per capita)                    | 2     | 1         |
| Cumulative cigarettes (10 years)               | 2     | 1         |
| Cumulative cigarettes (5 years)                | 2     | 1         |
| Education (years per capita)                   | 3     | -1        |
| Lag distributed income (per capita)            | 3     | -1        |
| Smoking prevalence                             | 2     | 1         |
| Improved water source (proportion with access) | 1     | -1        |
| Unsafe sanitation (summary exposure variable)  | 1     | 1         |
| Sociodemographic index                         | 3     | 0         |
| Health access and quality index                | 2     | -1        |

# Cellulitis

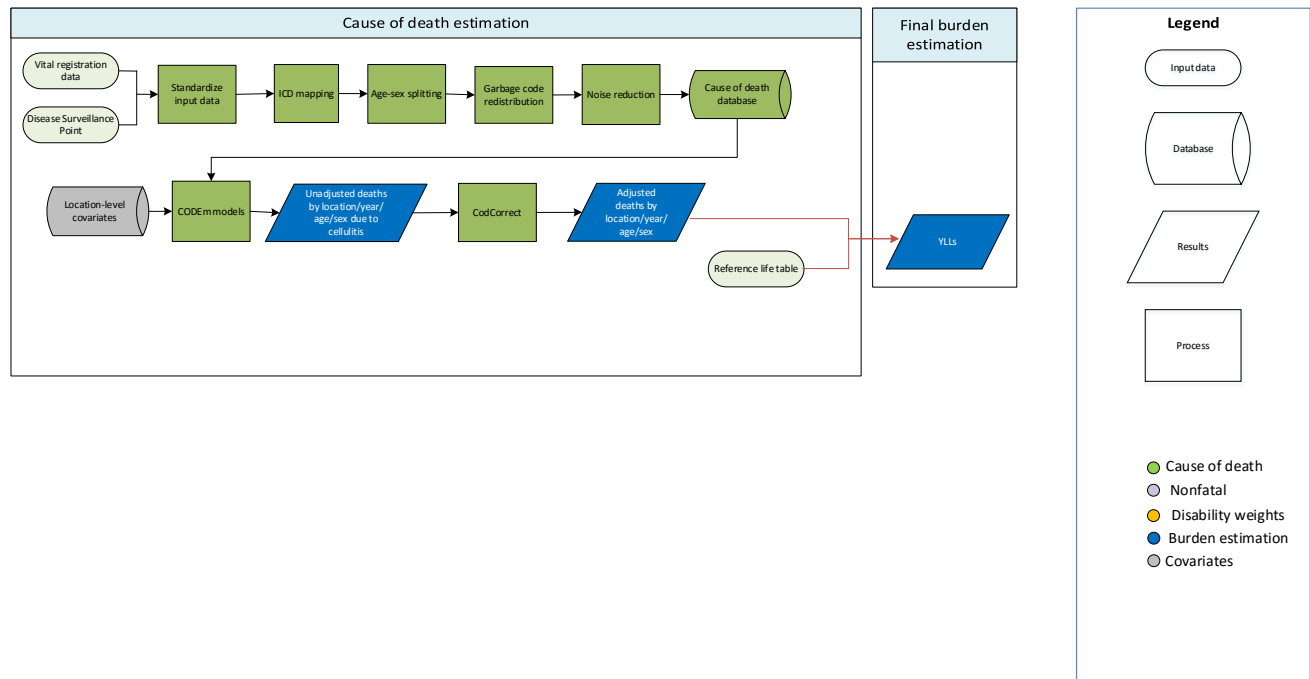

## Input data

Data used to estimate cellulitis mortality consisted of vital registration and Chinese disease surveillance point (DSP) data from the cause of death (COD) database. Outlier criteria excluded data points that were implausibly high or low relative to global or regional patterns and data from countries with small populations.

## Modeling strategy

The standard CODEm modeling approach was used to estimate deaths due to cellulitis. CODEm parameters were centrally defined. COD models were evaluated by comparing age-standardized death rates per 100,000 people to the GBD 2015 best model for 1990 and 2015 – individually for males and females. We also compared the age-standardized annualized rate of change for death rates per 100,000 persons to GBD 2015.

Compared to GBD 2015, we reduced the number of covariates for GBD 2016.

| Covariate                           | Level | Direction |
|-------------------------------------|-------|-----------|
| Education (years per capita)        | 3     | 0         |
| Log LDI (I\$ per capita)            | 3     | 0         |
| Healthcare access and quality index | 2     | -1        |

# Pyoderma

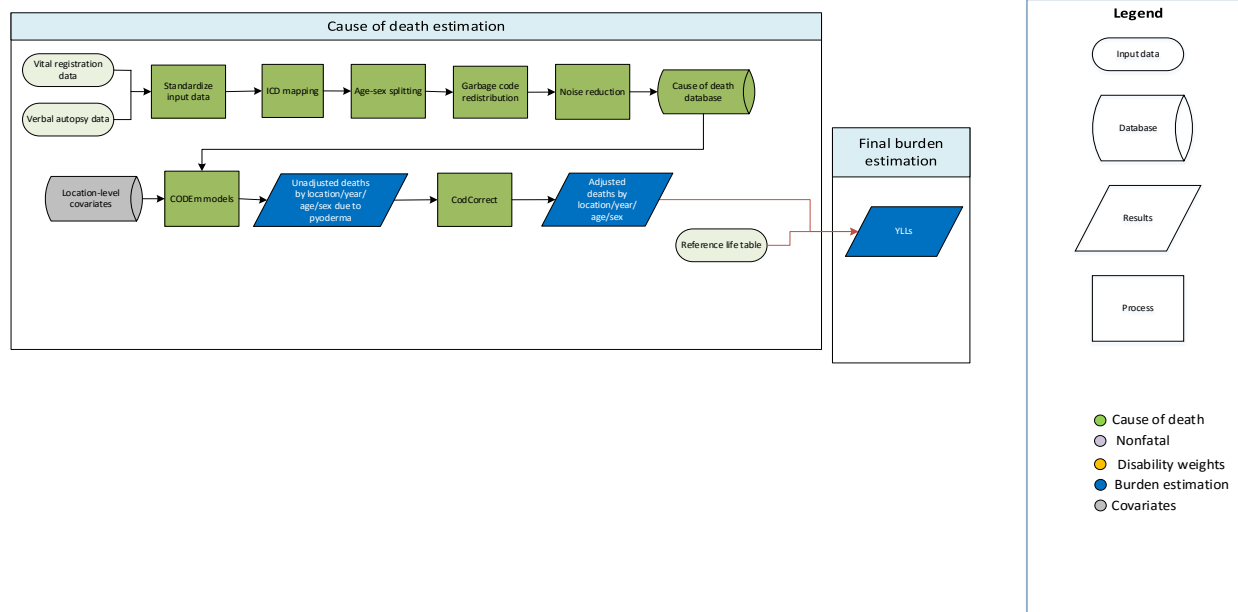

## Input data

Data used to estimate pyoderma mortality included centrally prepped vital registration and verbal autopsy data from the cause of death (COD) database. Outlier criteria excluded data points that were implausibly high or low relative to global or regional patterns and data from countries with small populations.

## Modelling strategy

We modelled deaths due to pyoderma with a standard CODEm model using the cause of death database and location-level covariates as inputs. The model followed standard parameters. We hybridized separate global and data-rich models to acquire unadjusted results, which we finalized and adjusted using CodCorrect to reach final years of life lost (YLLs) due to pyoderma. In GBD 2016 we added the healthcare access and quality index (HAQI) covariate to the model.

| Covariate                                      | Level | Direction |
|------------------------------------------------|-------|-----------|
| Alcohol (liters per capita)                    | 2     | 1         |
| Cumulative cigarettes (10 years)               | 2     | 1         |
| Cumulative cigarettes (5 years)                | 2     | 1         |
| Education (years per capita)                   | 3     | -1        |
| Lag distributed income (per capita)            | 3     | -1        |
| Smoking prevalence                             | 2     | 1         |
| Improved water source (proportion with access) | 1     | -1        |
| Unsafe sanitation (summary exposure variable)  | 1     | 1         |
| Sociodemographic index                         | 3     | 0         |
| Health access and quality index                | 2     | -1        |



# Decubitus ulcer

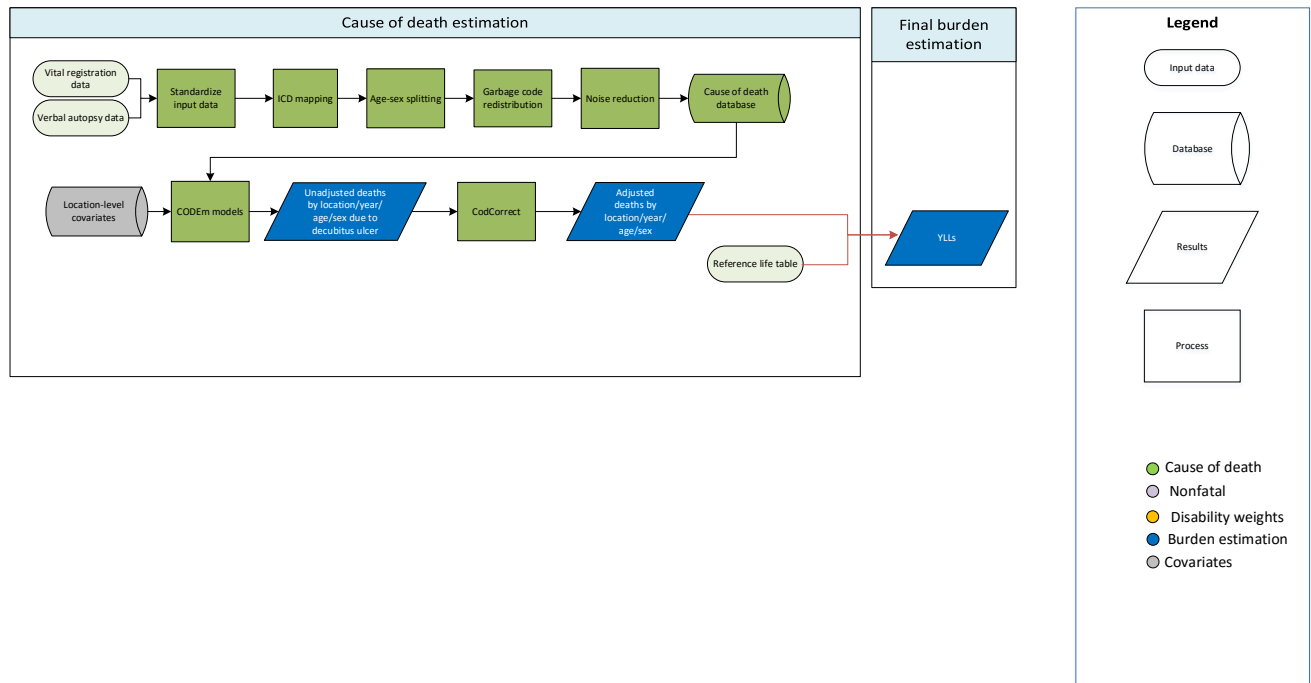

## Input data

Data used to estimate decubitus ulcer mortality consisted of vital registration sources and verbal autopsy sources from the cause of death (COD) database. Outlier criteria excluded data points that were implausibly high or low relative to global or regional patterns and data from countries with small populations.

## Modelling strategy

The standard CODEm modelling approach was used to estimate deaths due to decubitus ulcer. CODEm parameters were centrally defined. COD models were evaluated by comparing age-standardized death rates per 100,000 people to the GBD 2015 best model for 1990 and 2015 – individually for males and females. We also compared the age-standardized annualized rate of change for death rates per 100,000 persons to GBD 2015.

Decubitus ulcer death estimates were corrected for misclassification of Alzheimer and Parkinson disease deaths.

| Covariate                                      | Level | Direction |
|------------------------------------------------|-------|-----------|
| Alcohol (litres per capita)                    | 2     | 1         |
| Cumulative cigarettes (5 years)                | 2     | 1         |
| Cumulative cigarettes (10 years)               | 2     | 1         |
| Education (years per capita)                   | 3     | -1        |
| Health system access 2                         | 3     | -1        |
| Log LDI (I\$ per capita)                       | 3     | -1        |
| Smoking prevalence                             | 2     | 1         |
| Improved water source (proportion with access) | 1     | -1        |

|                                                                   |   |    |
|-------------------------------------------------------------------|---|----|
| Standardized Exposure Variable (SEV) scalar for unsafe sanitation | 1 | 1  |
| Socio-demographic Index                                           | 3 | 0  |
| Healthcare access and quality index                               | 2 | -1 |

---

## Other skin and subcutaneous diseases

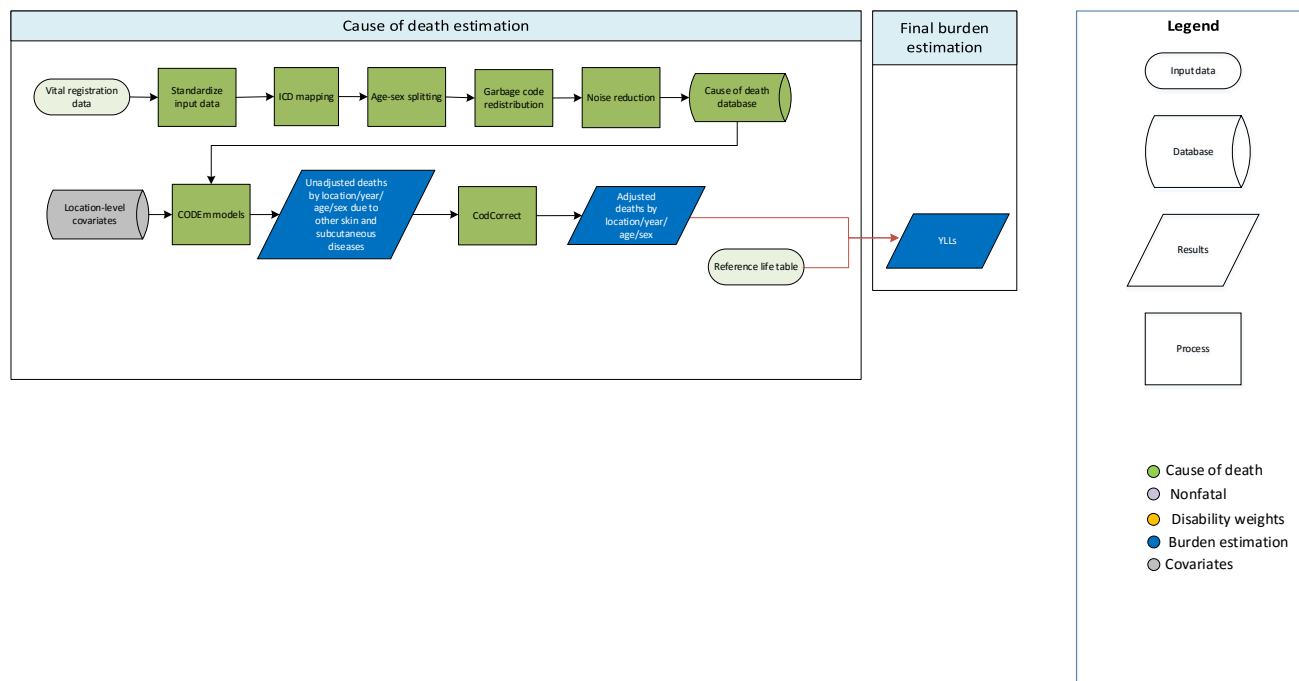

### Input data

Data used to estimate mortality due to other skin and subcutaneous diseases consisted of vital registration data from the cause of death (COD) database. We outliered data in instances where garbage code redistribution and noise reduction, in combination with small sample sizes, resulted in unreasonable cause fractions; and data that violated well-established time or age trends.

### Modelling strategy

The standard CODEm modelling approach was used to estimate deaths due to other skin and subcutaneous diseases. CODEm parameters were centrally defined. COD models were evaluated by comparing age-standardized death rates per 100,000 people to the GBD 2015 best model for 1990 and 2015 – individually for males and females. We also compared the age-standardized annualized rate of change for death rates per 100,000 people to GBD 2015.

There were no significant changes in the modelling process between GBD 2015 and GBD 2016.

| Covariate                                              | Level | Direction |
|--------------------------------------------------------|-------|-----------|
| Alcohol (litres per capita)                            | 2     | 1         |
| Cumulative cigarettes (5 years)                        | 2     | 1         |
| Cumulative cigarettes (10 years)                       | 2     | 1         |
| Education (years per capita)                           | 3     | -1        |
| Health system access 2                                 | 3     | -1        |
| Log LDI (I\$ per capita)                               | 3     | -1        |
| Underweight (proportion <2SD weight for age, <5 years) | 1     | 1         |
| Smoking prevalence                                     | 2     | 1         |
| Improved water source (proportion with access)         | 1     | -1        |

|                                                                   |   |    |
|-------------------------------------------------------------------|---|----|
| Standardized Exposure Variable (SEV) scalar for unsafe sanitation | 1 | 1  |
| Socio-demographic Index                                           | 3 | 0  |
| Healthcare access and quality index                               | 2 | -1 |

---

## Sudden Infant Death Syndrome (SIDS)

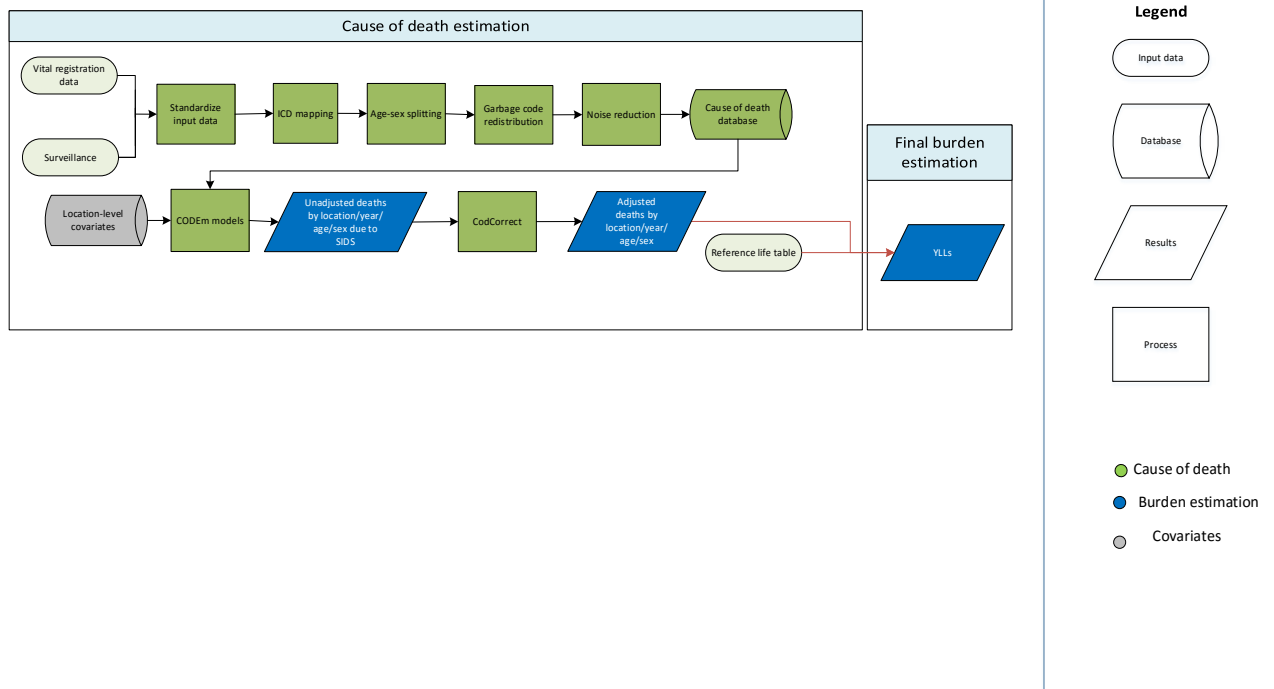

### Input data

Vital registration data were used to estimate deaths due to sudden infant death syndrome (SIDS). Data points were selected as outliers if they met the following criteria: (1) implausibly high values relative to country time trends or global or regional patterns, based on the assumption that there are not “outbreaks” of SIDS, or (2) substantially conflicting with established age or temporal patterns.

### Modelling strategy

The standard CODEm modelling approach was applied to estimate deaths due to SIDS. We ran CODEm models for ages 7–27 days and 28–364 days because we believe that deaths assigned to SIDS in other age groups are mis-assigned and are therefore treated as garbage codes. Surveillance data and verbal autopsy data were not used as inputs to this model because these sources do not use data collection methods that can accurately diagnose deaths due to SIDS.

Notable differences between the GBD 2013 and GBD 2015 strategy included updates across the board to smoking-related covariates, total fertility rate, and Socio-demographic Index covariates. The addition of American Samoa to the Oceania region was also of note, as well as the shift to including more ICD detail codes in the input data for some countries that previously reported only aggregated codes.

There were no significant changes in strategy from GBD 2015 to GBD 2016.

## Injuries

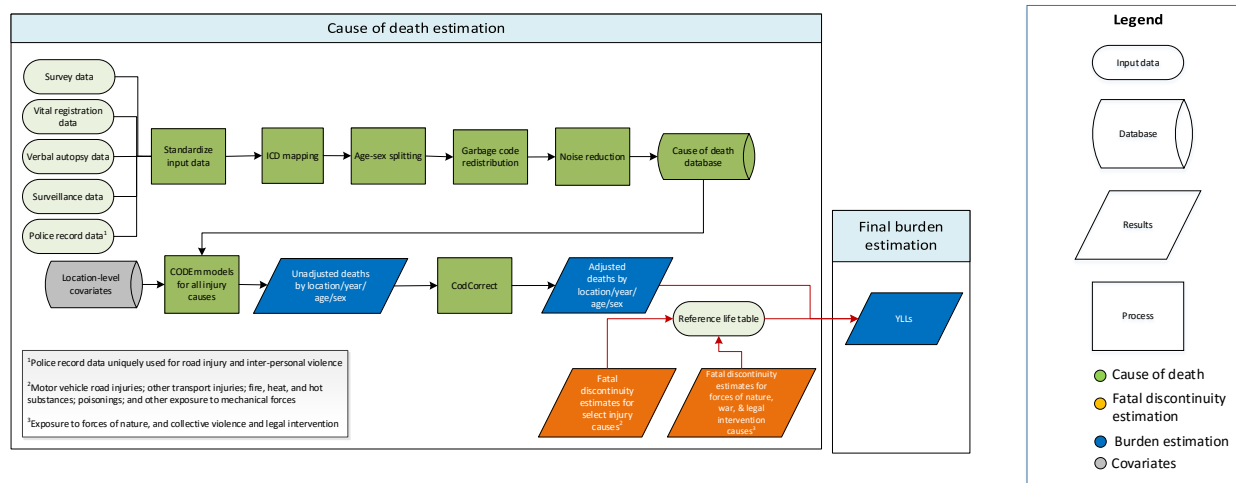

## Input data

In GBD 2016, we estimated injury mortality from vital registration, verbal autopsy, mortality surveillance, censuses, surveys, and police record data. Police and crime reports were data sources uniquely used for the estimation of deaths from road traffic injury and interpersonal violence. The police data were collected from published studies, national agencies, and institutional surveys such as the United Nations Crime Trends Survey and the WHO Global Status Report on Road Safety Survey. For countries with vital registration data we did not use police records, except if the recorded number of road injury and interpersonal violence deaths from police records exceeded that in the vital registration.

Infrequently, data points were marked as outliers. Outlier criteria excluded data points that (1) were implausibly high or low relative to global or regional patterns, (2) substantially conflicted with established age or temporal patterns, or (3) significantly conflicted with other data sources conducted from the same locations or locations with similar characteristics (ie, Socio-demographic Index).

## Modelling strategy

### Overview

In GBD 2016, the standard CODEm modelling approach was applied to estimate deaths due to all causes of injury, excluding “Exposure to forces of nature,” “Military operations and terrorism,” and “State actor violence,” which fall under the aggregate cause “Forces of nature, military operations and terrorism, and state actor violence.” These causes were modelled solely outside of the CODEm process as fatal discontinuities estimation; this process is detailed further in the section on fatal discontinuities estimation in the appendix.

Fatal discontinuity was estimated for five injury causes also modeled in CODEm. These causes included “Motor vehicle road injuries,” “Other transport injuries,” “Fire, heat, and hot substances,” “Poisonings,” and “Other exposure to mechanical forces.” Final fatal discontinuity estimations for these causes were merged with CODEm results post-CoDCorrect to produce final cause of death results.

Refer to the Table at the end of this section for a complete list of the cause-of-injury categories, modelling strategies, and covariate changes from GBD 2015.

#### GBD injury codes and categories

The International Classification of Diseases (ICD) was used to classify injuries. In GBD, injury incidence and death are defined as ICD-9 codes E000-E999 and ICD-10 chapters V to Y. There is one exception: deaths and cases of alcohol poisoning and drug overdoses are classified under drug and alcohol use disorders. In GBD 2016, injury causes were organized into 26 mutually exclusive and collectively exhaustive external cause-of-injury categories. For GBD 2016, “Self-harm” was distinguished into “Self-harm by firearm,” and “Self-harm by other specified means.”

#### Preparation of data

The preparation of cause of death data includes age splitting, age-sex splitting, smoothing, and outlier detection. These steps are described in detail by Naghavi et al and Lozano et al.<sup>1,2,3</sup> The concept of “garbage codes” and redistribution of these codes was proposed in GBD 1990.<sup>4</sup> Garbage codes are causes of death that should not be identified as specific underlying causes of death but have been entered as the underlying cause of death on death certificates. A classic example of these types of codes in injuries chapters are “Exposure to unspecified factor” (X59 in ICD-10 and E887 in ICD-9) and all undetermined intent codes (Y10-Y34 in ICD-10 and E980-E988 in ICD-9). Other examples of garbage codes in injuries are the coding of an injury death to intermediate codes like septicemia or peritonitis or as an ill-defined and unknown cause of mortality (R99). Approximately 2% of total deaths in countries with vital registration data are assigned to these three injury garbage code categories.

#### Splitting into sublevel causes

In countries with non-detail ICD code data, cause-of-injury categories were proportionally split into sublevel cause-of-injury categories. The sublevel cause-of-injury causes were created in the CoDCorrect process. One of the countries with non-detail ICD code data is South Africa, and in GBD 2013 the proportions of sublevel cause-of-injury were based on vital registration data. For GBD iterations of 2015 and 2016 the proportions were based on post-mortem investigation of injury deaths as described in the paper by Matzopoulos et al. 2015.<sup>5</sup>

#### Limitations and model assumptions

We added police data for road injuries and interpersonal violence to help predict level and age patterns in countries with sparse or absent cause of death data even though we know from countries with near-complete vital registration data that police records tend to underestimate the true level of deaths. However, we applied police data estimates in instances where reported deaths were higher than vital registration numbers.

For the cause-of-injury category “Unintentional suffocation” we suspect that varying practices in coding deaths to sudden infant death syndrome (which end up in “Unintentional suffocation”) can explain some of the differences we see and we plan to explore that further in the next iteration of GBD.

| Table – Injury Cause List |                                                                               |                                          |                                                 |
|---------------------------|-------------------------------------------------------------------------------|------------------------------------------|-------------------------------------------------|
| ID                        | Cause                                                                         | Modelling Strategy                       | Covariate changes from GBD 2015                 |
| 1                         | Transport injuries                                                            | CODEm                                    |                                                 |
| 1.1                       | Road injuries                                                                 | CODEm                                    |                                                 |
| 1.1.a                     | Pedestrian road injuries                                                      | CODEm                                    |                                                 |
| 1.1.b                     | Cyclist road injuries                                                         | CODEm                                    |                                                 |
| 1.1.c                     | Motorcyclist road injuries                                                    | CODEm                                    |                                                 |
| 1.1.d                     | Motor vehicle road injuries                                                   | CODEm and fatal discontinuity estimation |                                                 |
| 1.1.e                     | Other road injuries                                                           | CODEm                                    |                                                 |
| 1.2                       | Other transport injuries                                                      | CODEm and fatal discontinuity estimation |                                                 |
| 2                         | Unintentional injuries                                                        | CODEm                                    |                                                 |
| 2.1                       | Falls                                                                         | CODEm                                    |                                                 |
| 2.2                       | Drowning                                                                      | CODEm                                    |                                                 |
| 2.3                       | Fire, heat, and hot substances                                                | CODEm and fatal discontinuity estimation |                                                 |
| 2.4                       | Poisonings                                                                    | CODEm and fatal discontinuity estimation |                                                 |
| 2.5                       | Exposure to mechanical forces                                                 | CODEm                                    |                                                 |
| 2.5.a                     | Unintentional firearm injuries                                                | CODEm                                    |                                                 |
| 2.5.b                     | Unintentional suffocation                                                     | CODEm                                    |                                                 |
| 2.5.c                     | Other exposure to mechanical forces                                           | CODEm and fatal discontinuity estimation |                                                 |
| 2.6                       | Adverse effects of medical treatment                                          | CODEm                                    |                                                 |
| 2.7                       | Animal contact                                                                | CODEm                                    |                                                 |
| 2.7.a                     | Venomous animal contact                                                       | CODEm                                    |                                                 |
| 2.7.b                     | Non-venomous animal contact                                                   | CODEm                                    |                                                 |
| 2.8                       | Foreign body                                                                  | CODEm                                    |                                                 |
| 2.8.a                     | Pulmonary aspiration and foreign body in airway                               | CODEm                                    |                                                 |
| 2.8.b                     | Foreign body in other body part                                               | CODEm                                    |                                                 |
| 2.9                       | Environmental exposure to heat and cold                                       | CODEm                                    |                                                 |
| 2.10                      | Other unintentional injuries                                                  | CODEm                                    |                                                 |
| 3                         | Self-harm and interpersonal violence                                          | CODEm                                    |                                                 |
| 3.1                       | Self-harm                                                                     | CODEm                                    |                                                 |
| 3.1.1                     | Self-harm by firearm                                                          | CODEm                                    | Same covariates used as self-harm from GBD 2015 |
| 3.1.2                     | Self-harm by other specified means                                            | CODEm                                    | Same covariates used as self-harm from GBD 2015 |
| 3.2                       | Interpersonal violence                                                        | CODEm                                    |                                                 |
| 3.2.a                     | Assault by firearm                                                            | CODEm                                    |                                                 |
| 3.2.b                     | Assault by sharp object                                                       | CODEm                                    |                                                 |
| 3.2.c                     | Assault by other means                                                        | CODEm                                    |                                                 |
| 4                         | Forces of nature, military operations and terrorism, and state actor violence |                                          |                                                 |



| Table – Injury Cause List |                                   |                                                                                    |                                 |
|---------------------------|-----------------------------------|------------------------------------------------------------------------------------|---------------------------------|
| ID                        | Cause                             | Modelling Strategy                                                                 | Covariate changes from GBD 2015 |
| 4.1                       | Exposure to forces of nature      | Fatal discontinuity estimation for disaster (appended post-CoDCorrect)             | N/A                             |
| 4.2                       | State actor violence              | Fatal discontinuity estimation for state actor violence (appended post-CoDCorrect) | N/A                             |
| 4.3                       | Military operations and terrorism | Fatal discontinuity estimation for state actor violence (appended post-CoDCorrect) | N/A                             |

## References

- 1 Lozano R, Naghavi M, Foreman K, *et al.* Global and regional mortality from 235 causes of death for 20 age groups in 1990 and 2010: a systematic analysis for the Global Burden of Disease Study 2010. *The Lancet* 2012; **380**: 2095–128.
- 2 Global, regional, and national age–sex specific all-cause and cause-specific mortality for 240 causes of death, 1990–2013: a systematic analysis for the Global Burden of Disease Study 2013. *The Lancet* 2015; **385**: 117–71.
- 3 Global, regional, and national life expectancy, all-cause mortality, and cause-specific mortality for 249 causes of death, 1980-2015: a systematic analysis for the Global Burden of Disease Study 2015. *The Lancet* 2016; **388**: 1459-1544.
- 4 Murray CJL, Lopez AD, Harvard School of Public Health, World Health Organization, World Bank. The global burden of disease: a comprehensive assessment of mortality and disability from diseases, injuries, and risk factors in 1990 and projected to 2020. Cambridge, MA: Published by the Harvard School of Public Health on behalf of the World Health Organization and the World Bank : Distributed by Harvard University Press, 1996.
- 5 Matzopoulos R, Prinsloo M, Wyk VP, Gwebushe N, Mathews S, *et al.* Injury-related mortality in South Africa: a retrospective descriptive study of postmortem investigations. *Bull World Health Organ* 2015; **93**: 303–13.

# Fatal Discontinuities

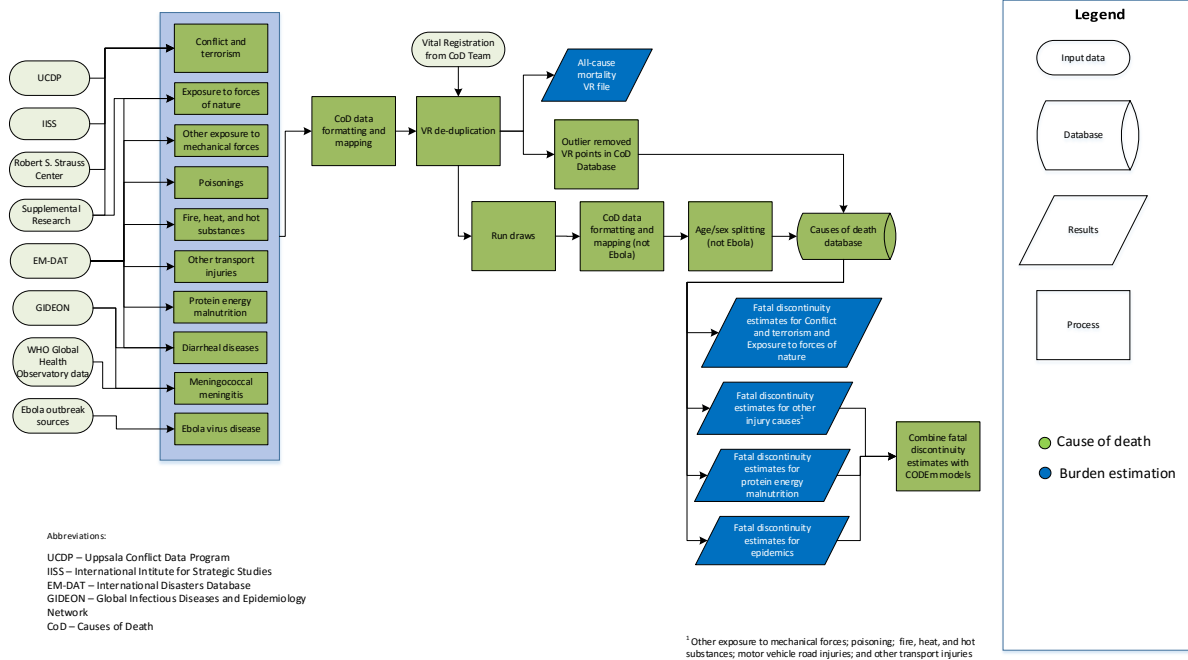

## Input data

### Overall

Input data for fatal discontinuities are compiled a range of sources, including country vital registration (VR) data; international databases that capture several cause-specific fatal discontinuities; and supplemental data in the presence of known issues with data quality or representativeness, or time lags in reporting. A systematic literature review was not used to identify input data for fatal discontinuities, though some literature sources were identified through online supplemental research. Below we provide more detail on the different input data sources by sub-causes of fatal discontinuities.

### Subnational locations and population splitting

In locations where we produced estimates at the subnational level for GBD 2016, deaths due to all fatal discontinuity causes were assigned to the relevant subnational location(s) when that information could be obtained either through country data sources (e.g., VR) or through additional online research. If no subnational location could be found, the deaths were split proportionally by population across all subnational locations.

In locations that have experienced boundary changes or split from other locations that we currently estimate (e.g., the former Yugoslavia, Czechoslovakia, the Soviet Union, Sudan and South Sudan), we split deaths due to events that occurred prior to boundary changes proportionally based on the populations residing within the boundaries of present-day locations unless we found documentation that clearly indicated whether the event and corresponding deaths occurred in one of the present-day GBD 2016 locations.

#### *Locations with 4- or 5-star data quality ratings*

For countries and territories assigned 4- or 5-star data quality ratings (see Section 2 of the appendix for details), we prioritized data from country-specific vital registration. VR data for fatal discontinuities was exclusively used in 4- and 5-star locations unless there was well-known data quality issues or discrepancies in the cause of death data reporting related to a particular event (e.g., supplemental death data for Louisiana was used for Hurricane Katrina because of established data reporting issues). The process for identification of location-year fatal discontinuities is described more in the Modelling strategy below.

#### *Locations with less than 4-star data quality ratings*

For countries and territories assigned data quality ratings below 4 stars, we compared VR with data available from alternative sources for Exposure to forces of nature, taking the highest death estimate available from all sources. For other fatal discontinuity causes, we disregarded lower quality VR and used well-established databases by type of fatal discontinuity. Whenever specific events were identified that did not have corresponding data points within these databases, we used supplemental data sources, including scientific literature.

Major data sources other than country vital registration for each fatal discontinuity cause follow.

***Conflict and terrorism.*** Data for conflict and terrorism come from the Uppsala Conflict Data Program (UCDP), International Institute for Strategic Studies, and Robert S. Strauss Center for International Security and Law. The table below provides details about the various datasets we utilized from these sources, the dates they were last accessed, and the years for which we used the data provided.

| Data source name                                                   | Date accessed | Years of data downloaded | Type of data included                                                                                                                                                                                                                               |
|--------------------------------------------------------------------|---------------|--------------------------|-----------------------------------------------------------------------------------------------------------------------------------------------------------------------------------------------------------------------------------------------------|
| <b>Uppsala Conflict Data Program<sup>1</sup></b>                   |               |                          |                                                                                                                                                                                                                                                     |
| Battles                                                            | 10/6/16       | 1989-2015                | Armed conflict: incompatibility that concerns government and/or territory over which the use of armed force between the military forces of two parties, of which at least one is the government of a state, which resulted in deaths                |
| Non-state                                                          | 10/6/16       | 1989-2015                | The use of armed force between two organized armed groups, neither of which is the government of a state, which results in deaths                                                                                                                   |
| One-sided                                                          | 10/6/16       | 1989-2015                | The use of armed force by the government of a state or by a formally organized group against civilians which results in deaths                                                                                                                      |
| Georeferenced Event Dataset                                        | 10/6/16       | 1989-2015                | UCDP battles, non-state, and one-sided conflict deaths with the most disaggregated location information available                                                                                                                                   |
| PRIO Battles Deaths Dataset                                        | 10/6/16       | 1970-1988                | Armed conflict (civil wars, etc.)                                                                                                                                                                                                                   |
| <b>International Institute for Strategic Studies</b>               |               |                          |                                                                                                                                                                                                                                                     |
| Armed Conflict Dataset                                             | 10/6/16       | 1997-Present             | Insurgency, Inter-state, Intra-state conflict deaths                                                                                                                                                                                                |
| <b>Robert S. Strauss Center For International Security And Law</b> |               |                          |                                                                                                                                                                                                                                                     |
| Armed Conflict Location and Event Dataset (ACLED)                  | 10/6/16       | 1997-2016                | Actions of opposition groups, governments, and militias in selected locations in Africa and Asia, specifying the exact location and date of battle events, transfers of military control, headquarter establishment, civilian violence, and rioting |
| Social Conflict Analysis Database (SCAD)                           | 10/6/16       | 1990-2016                | Protests, riots, strikes, inter-communal conflict, government violence against civilians, and other forms of social conflict (covers Africa and Latin America)                                                                                      |

Supplemental online research was conducted for recent conflicts where the databases above were not up-to-date. In addition, deaths due to conflict and terrorism in Iraq from 2003 to present were estimated using a combination of supplemental sources. The source found with the lowest number of deaths, Iraq Body Count<sup>2</sup>, was used as the lower bound of the uncertainty interval from 2003 to 2016. Estimates from the Iraq Mortality Study by Hagopian et al<sup>3</sup> from 2003 to 2006, the deadliest years of the war, were used to scale deaths to generate the upper uncertainty interval limits using the following formula:

$$deaths_{GBD\ 2016,\ high} = deaths_{IBC} \cdot \left[ \frac{deaths_{IMS}}{deaths_{IBC}} \right]_{2003-2006}$$

We used the average ratio between IMS and IBC reported deaths between 2003 and 2006, multiplied by the number of deaths reported by the IBC. This high estimate is carried forward through 2016 under the assumption that the Iraq Body Count similarly undercounts the number of deaths due to the ongoing civil war in Iraq. The final, best estimate for conflict and terrorism deaths in Iraq from 2003 to 2016 is the midpoint of the high and low estimates given above.

We identified four major conflicts that were not represented in these databases: 1997 civil conflict in Albania<sup>4</sup>; 1971 genocide in Bangladesh<sup>5</sup>; 1972 genocide in Burundi<sup>6</sup>; and 1993 genocide in Burundi<sup>6</sup>. In these cases, we used literature sources in order to account for these fatal discontinuities.

For country-years where multiple sources provided estimates, we prioritized sources in the following order: (1) country VR data, if death estimates were highest of all sources; (2) UCDP; (3) IISS; (4) country VR if death estimates were not the highest of all sources; (5) Robert Strauss Center; (6) online supplemental research.

***Exposure to forces of nature, other injury causes, and protein-energy malnutrition.*** The Centre for Research on the Epidemiology of Disasters' International Disaster Database (EM-DAT) served as the primary non-VR source of fatal discontinuities due to exposure to forces of nature (i.e., natural disasters); other transport injuries (e.g., plane, train, and boat accidents); poisonings; fire, heat, and hot substances; other exposure to mechanical forces (eg, building collapse); and protein-energy malnutrition (ie, famine or severe drought). Data from EM-DAT were last accessed March 29, 2017. Supplemental online research was conducted for events where EM-DAT was not up-to-date.

For country-years where multiple sources provided estimates, we prioritized sources in the following order: (1) country VR data, if data quality rating is 4 or 5 stars; (2) country VR data if data quality rating is less than 4 stars and death estimates were highest of all sources; (3) EM-DAT; (4) online supplemental research. Exceptions were made where it was clear that VR systems had been compromised by the event being measured.

***Meningococcal meningitis and diarrheal diseases.*** New to GBD 2016, we sought to include fatal discontinuities due to a subset of infectious diseases: meningococcal meningitis (or meningococcal infection) and diarrheal disease caused by cholera. These two infectious diseases were included on the fatal discontinuity cause list for GBD 2016 because (1) their current modelling strategies with the Cause of Death Ensemble model (CODEm) does not optimally capture the potentially highly variable – or epidemic – mortality levels and trends characteristic of these two causes; and (2) they can contribute to significant total fatalities in a given location-year. Other infectious diseases for which the latter is true – high death rates in the presence of an outbreak or epidemic – are currently modelled with alternative cause of death methods (eg, natural history models for measles and yellow fever), which allow for greater variation year-over-year if or when outbreaks occur. In future iterations of the GBD, we plan to revisit the inclusion criteria for infectious diseases as fatal discontinuities and develop more of an ensemble approach to modelling causes that can be both endemic (and thus result in more uniform levels and trends over time) and epidemic (and subsequently lead to rapid increases – and decreases – in deaths for a given location-year).

The Global Infectious Diseases and Epidemiology Network (GIDEON) served as the primary data source for collating cholera and meningococcal meningitis or meningococcal infection death reports.<sup>7,8</sup> For any year in which cholera or meningococcal meningitis deaths were recorded in a country or territory covered by the GBD, we directly extracted reported deaths from 1970 to 2016. When there were reporting gaps in cholera or meningococcal meningitis deaths over this period of time and the World Health Organization (WHO) annual cholera or meningitis reports had death reports for those years, we used the WHO reports. The primary exception were two major cholera outbreaks in Bangladesh – 1982-1983 and 1991 – which were not captured by either GIDEON or WHO. As result, we used the EM-DAT records for the 1982-1983 outbreak and literature for the 1991 outbreak.<sup>9</sup>

**Ebola.** Since GBD 2015, outbreaks due to Ebola virus disease have been estimated using the data and methods described in the Ebola write-up of this appendix and included in GBD death estimates in the same way as other fatal discontinuity causes.

### **Modelling strategy**

All input data for fatal discontinuity causes were run through the causes of death data formatting and mapping process.

#### *VR de-duplication*

For country-years where deaths due to fatal discontinuity causes were recorded in both VR and other utilized data sources, the higher of the two estimates were taken in the case of deaths due to conflict and terrorism and exposure to forces of nature.

For the other injury causes that also have a CODEm model, a process was established to avoid duplication of fatal discontinuity deaths in the two models. First, location-years with death data from non-VR sources were identified. If these location-cause-years also had VR death estimates that were greater than 40% higher than the immediately surrounding years and could be linked to a specific fatal discontinuity event, these years were marked as outliers in the VR data and the difference between the outlier year and the average of the surrounding years was included in the relevant cause in the fatal discontinuities database. The deaths from the identified events were subtracted from the all-cause VR estimates used in the all-cause mortality estimation process.

#### *Uncertainty analysis for input and draw-level input to age-sex splitting*

Uncertainty intervals for deaths due to conflict and terrorism were generated using UCDP high and low death estimates, except in the case of Iraq 2003-2016, as explained above. In cases where low and high estimates were not included in the available data, the regional average uncertainty interval was applied to the available death estimate across all fatal discontinuity causes.

We assumed a normal distribution using the mean deaths and standard deviation based on high and low estimates. The standard deviation was capped at the mean divided by 1.96 in order to ensure that 95% of the 3,000 draws generated were greater than zero. Non-positive draws were dropped, and 1,000 draws were sampled from the remaining set of positive draws. These 1,000 positive draws were used for final calculations of means and uncertainty intervals.

#### *Age-sex splitting*

All compiled data were run through the causes of death age-sex splitting process.

#### *Changes from GBD 2015*

GBD 2016 saw an effort to systematize the collection of up-to-date fatal discontinuity data through supplemental online research. New tools included expanded use of web scraping and online media tracking. This process resulted in a more comprehensive set of conflict and terrorism data for 2016, as well as large natural disasters not contained in EM-DAT or VR.

In previous rounds of GBD, deaths due to executions and police conflict were included with conflict and terrorism. In GBD 2016, these causes were separated and estimated separately from the overarching war and conflict cause group using a CODEm model, as described in this appendix.

We added two epidemic infectious diseases, cholera and meningococcal meningitis, to the list of fatal discontinuities in an effort to better capture the large variations in mortality that these causes can incur.

We removed the absolute death threshold for fatal discontinuities and limited our inclusion criteria to an event exceeding a mortality rate threshold per location-year. We view this revision as an improvement for estimating the effects of fatal discontinuities in subnational locations and countries with smaller populations, as an absolute threshold of 10, 20, or 50 deaths would ultimately omit events in these places.

## References

- 1 UCDP/PRIO Armed Conflict Dataset Codebook. Uppsala Conflict Data Program (UCDP); Centre for the Study of Civil Wars, International Peace Research Institute, Oslo (PRIO), 2013.
- 2 Iraq Body Count. <https://www.iraqbodycount.org/database/> (accessed May 8, 2017).
- 3 Hagopian A, Flaxman AD, Takaro TK, *et al.* Mortality in Iraq Associated with the 2003–2011 War and Occupation: Findings from a National Cluster Sample Survey by the University Collaborative Iraq Mortality Study. *PLOS Medicine* 2013; **10**: e1001533.
- 4 Jarvis C. The Rise and Fall of Albania's Pyramid Schemes. *F&D* 2000; **37**.  
<http://www.imf.org/external/pubs/ft/fandd/2000/03/jarvis.htm>.
- 5 Obermeyer Z, Murray CJL, Gakidou E. Fifty years of violent war deaths from Vietnam to Bosnia: analysis of data from the world health survey programme. *BMJ* 2008; **336**: 1482–6.
- 6 Milton L. Rwanda, 1994: International incompetence produces genocide. 1994  
<https://ezproxy.uwc.edu/login?url=http://search.proquest.com/docview/234405747?accountid=42411>.
- 7 Inc GI, Berger DS. Cholera: Global Status: 2017 edition. GIDEON Informatics Inc, 2017.
- 8 Inc GI, Berger DS. Bacterial Meningitis: Global Status: 2017 edition. GIDEON Informatics Inc, 2017.
- 9 Siddique A, Zaman K, Baqui A, *et al.* Cholera Epidemics in Bangladesh: 1985-1991. *Journal of Diarrhoeal Diseases Research* 1992; **10**: 79–86.

## Section 9. Modeling specific methods on nonfatal estimation



# Tuberculosis Flowchart

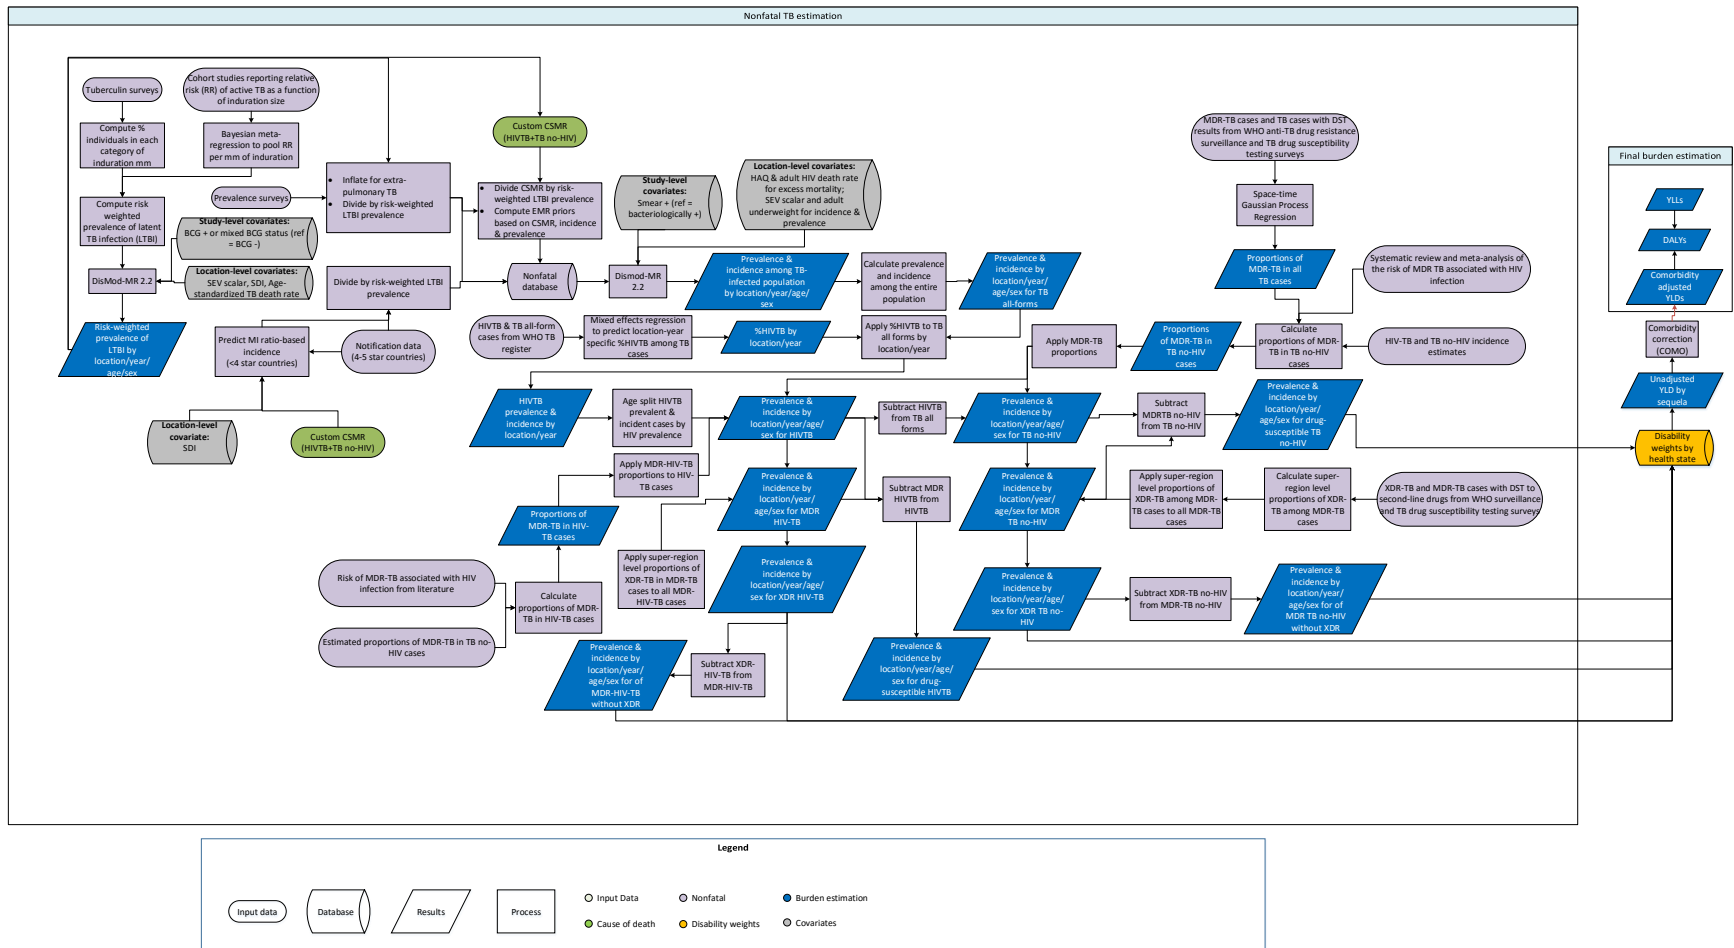

## Case Definition

Tuberculosis (TB) is an infectious disease caused by *Mycobacterium tuberculosis*. The case definition includes all forms of TB including pulmonary TB and extrapulmonary TB which are bacteriologically confirmed or clinically diagnosed. For TB, the ICD 10 codes are A10-A19.9, B90-B90.9, K67.3, K93.0, M49.0, P37.0, and ICD 9 codes are 010-019.9, 137-137.9, 138.0, 138.9, 139.9, 320.4, 730.4-730.6. For HIV-TB, the ICD 10 code is B20.0.

Latent TB infection (a new sequela added for GBD 2016) is defined as an infection with *Mycobacterium tuberculosis*, without any symptoms or signs of active TB disease.

We have separately estimated the incidence and prevalence of multidrug-resistant tuberculosis and extensively drug-resistant tuberculosis by HIV status in GBD 2016. The case definitions of the new causes are shown below.

- (1) Multidrug-resistant TB without extensive drug resistance: a form of TB (among HIV-negative individuals) that is resistant to the two most effective first-line anti-tuberculosis drugs (isoniazid and rifampicin), but is not resistant to any fluoroquinolone and any second-line injectable drugs (amikacin, kanamycin, or capreomycin).
- (2) Extensively drug-resistant TB: a form of TB (among HIV-negative individuals) that is resistant to isoniazid and rifampicin, plus any fluoroquinolone and any second-line injectable drugs.
- (3) Drug-susceptible TB: TB (among HIV-negative individuals) that is susceptible to isoniazid and rifampicin
- (4) Multidrug-resistant HIV-TB without extensive drug resistance: a form of TB (among HIV-positive individuals) that is resistant to the two most effective first-line anti-tuberculosis drugs (isoniazid and rifampicin), but is not resistant to any fluoroquinolone and any second-line injectable drugs (amikacin, kanamycin, or capreomycin).
- (5) Extensively drug-resistant HIV-TB: a form of TB (among HIV-positive individuals) that is resistant to isoniazid and rifampicin, plus any fluoroquinolone and any second-line injectable drugs
- (6) Drug-susceptible HIV-TB: TB (among HIV-positive individuals) that is susceptible to isoniazid and rifampicin

## Input data

### *Model Inputs*

Input data for TB include annual case notifications, data from prevalence surveys, and estimated cause-specific mortality (CSMR) of TB among HIV-positive and HIV-negative individuals. From these inputs, we calculated 'priors' (expected values) on excess mortality to give more guidance to the model. An updated systematic review was done for GBD 2016 (the search terms are shown in the table below).

Input data for latent TB infection (LTBI) include: (1) population-based tuberculin surveys, and (2) cohort studies examining the risk of developing active TB disease as a function of induration size. We searched PubMed and Google Scholar, and also manually searched the reference list of relevant studies to aid

identification of additional studies. The search terms, number of studies identified, and number of studies included are shown in the table below.

| Outcome                   | Search Terms                                                                                                                                                                                                                                                                                                                                                                                                                                                                                                                                                                                                                                                                                                                                                                                              | Total number of studies identified | Number of studies included |
|---------------------------|-----------------------------------------------------------------------------------------------------------------------------------------------------------------------------------------------------------------------------------------------------------------------------------------------------------------------------------------------------------------------------------------------------------------------------------------------------------------------------------------------------------------------------------------------------------------------------------------------------------------------------------------------------------------------------------------------------------------------------------------------------------------------------------------------------------|------------------------------------|----------------------------|
| Tuberculosis*             | PubMed search terms: ("tuberculosis"[MeSH] OR tuberculosis[Title/Abstract]) OR TB[Title/Abstract] OR Mycobacterium tuberculosis[Title/Abstract] AND prevalence[Title/Abstract] AND ("2015/01/01"[PDAT] : "2016/11/02"[PDAT]) NOT (animals[MESH] NOT humans[MESH])                                                                                                                                                                                                                                                                                                                                                                                                                                                                                                                                         | 1061                               | 3                          |
| LTBI (tuberculin surveys) | PubMed search terms: ("tuberculin survey"[tiab] OR (("risk"[MeSH Terms] OR "risk"[tiab] OR "risk of"[tiab]) AND ("tuberculosis"[MeSH Terms] OR "tuberculosis"[tiab] OR "tuberculous"[tiab]) AND ("infection"[MeSH Terms] OR "infection"[tiab])) OR (("risk"[MeSH Terms] OR "risk"[tiab] OR "risk of"[tiab]) AND TB[tiab] AND ("infection"[MeSH Terms] OR "infection"[tiab])) OR "latent tuberculosis infection"[tiab] OR "latent TB infection"[tiab] OR "latent tuberculosis"[MESH]) AND ("survey"[tiab] OR "surveys"[tiab]) NOT (animals[MESH] NOT humans[MESH])<br><br>Google Scholar search terms: ("tuberculin survey") OR (("risk of tuberculous infection" OR "risk of tuberculosis infection" OR "risk of TB infection" OR "latent tuberculosis infection" OR "latent TB infection") AND "survey") | 9029                               | 108                        |
| LTBI (cohort studies)     | PubMed search terms: ("tuberculin"[tiab] OR ("tuberculin"[tiab] AND "positive"[tiab]) OR "Mantoux"[tiab] OR ("Mantoux"[tiab] AND "positive"[tiab]) OR "induration"[tiab]) AND (active[tiab] AND ("tuberculosis"[MeSH] OR "tuberculosis"[tiab])) AND ("risk"[MeSH] OR "risk"[tiab]) AND ("prospective"[tiab] OR "follow up"[tiab] OR "longitudinal"[tiab])<br><br>Google Scholar search terms: (("tuberculin" OR "Mantoux" OR "tuberculin reactivity") AND ("risk of tuberculosis" OR "tuberculosis risk")) -autopsy -autopsies -nosocomial -qualitative -prison -cancer -malignant -homeless -smoking                                                                                                                                                                                                     | 3624                               | 27                         |

\* Updated systematic review, covering the period from 2015/01/01 to 2016/11/02

Input data for multidrug-resistant TB (MDR-TB) and extensively drug-resistant TB (XDR-TB) include: (i) the number of drug-resistant cases by type [MDR-TB, XDR-TB, TB cases with a drug sensitivity testing (DST) result for isoniazid and rifampicin, and MDR-TB cases with DST for second-line drugs] from routine

surveillance and surveys reported to the World Health Organization, and (ii) the risk of MDR-TB associated with HIV infection from the literature.<sup>1</sup>

## Modeling Strategy

### Overview

We made major changes to our modelling of TB. First, we estimated risk-weighted prevalence of LTBI by location, year, age and sex using data from population-based tuberculin surveys and cohort studies reporting on the risk of developing active TB disease as a function of induration size. Next, we divided the inputs on prevalence (from surveys in low and middle income countries), incidence (notification data from countries with a four or five-star rating, and estimated incidence for countries with a less than four-star rating), and CSMR by the risk-weighted LTBI prevalence in order to model TB among those at risk in each country. To generate incidence estimates, we first ran a regression using MI ratios (logit transformed) from locations with a 4 or 5-star rating on causes of death with SDI as a covariate anchoring the lower end of the SDI scale with a data point from the Bangalore study<sup>2</sup> reporting that 49.2% of 126 untreated new pulmonary TB cases were dead at the end of the 5-year follow up period, to predict age-sex specific MI ratios for all locations and years. We then estimated age-sex specific incidence using the predicted MI ratios and CSMR estimates. We used DisMod-MR 2.2, the GBD Bayesian meta-regression tool to generate consistent trends in all parameters. We then multiplied the DisMod-MR 2.2 outputs by the risk-weighted prevalence of LTBI to get population-level estimates of incidence and prevalence. Because the output from DisMod-MR 2.2 are for all forms of TB, we split them into MDR-TB and XDR-TB by HIV status. To do so, we estimated the proportions of TB cases with MDR-TB for all locations and years, using data from notifications and survey data. We then estimated the proportions of MDR-TB among HIV-negative individuals and MDR-TB among HIV-positive individuals based on the risk of MDR-TB associated with HIV infection from a meta-analysis<sup>1</sup>. To split MDR-TB into MDR-TB with and without extensive drug resistance, we pooled the limited notification and survey data on the proportion of MDR-TB cases who are extremely drug resistant by super-region, and applied these proportions to MDR-TB cases among HIV-negative and HIV-positive individuals respectively.

### *Modeling risk-weighted latent TB infection prevalence*

Input data for modeling risk-weighted LTBI prevalence were from two sources: (i) population based tuberculin skin test (TST) surveys, and (ii) cohort studies examining the risk of developing active TB disease as a function of induration size. First, we extracted the prevalence of tuberculin skin testing results by induration size using the most detailed induration categories reported by studies. Second, from cohort studies reporting on the relative risk of developing active TB disease as a function of induration size, we pooled the risk of developing active TB by induration size in millimeters using the DisMod Ode computational engine. Third, we multiplied the LTBI prevalence by induration in millimeters ranging from 0-20+ with the relative risk of developing active TB at each induration size, and summed them up to derive risk-weighted LTBI prevalence for each age group.

Available evidence<sup>3</sup> suggests that people with very advanced HIV infection (CD4 counts <200 cells/mm<sup>3</sup>) may have a false-negative TST (0mm induration) due to profound immune suppression, but still have very high risk for TB. For those who are HIV-positive, but with higher CD4 counts, the risk for active TB increases with greater induration size as in HIV-negative individuals (i.e., the shape of the tuberculin response curve is similar to that for the general population). To take into account the false-negative TST response in HIV cases with profound immune suppression, we first computed the proportion of HIV-positive individuals with CD4 counts <200 cells/mm for the 0mm induration group using our HIV prevalence estimates for that particular category. We then multiplied that proportion by the relative risk of developing active TB disease in the 0mm induration group compared with the 20+ mm induration group among HIV positive individuals. The relative risk was computed using data from a prospective, multicenter cohort study of HIV-positive people in the United States.<sup>3</sup>

Using the risk-weighted LTBI prevalence (adjusting for a false-negative TST among people with advanced HIV infection) as input data, we ran a DisMod MR 2.2 model with three location-level covariates, namely, Socio-demographic Index (SDI), Summary Exposure Variable (SEV) scalar for TB (a summary variable of the exposure levels of TB risk factors weighted by relative risk), and age-standardized TB mortality rate, to generate risk-weighted LTBI prevalence by location, year, age and sex. We included two study covariates (BCG positive, and mixed BCG status) where the reference category is BCG negative. We found no statistically significant difference between studies using different dosages of tuberculin purified protein derivative (PPD). We therefore did not include different PPD dosages as study covariates but added more uncertainty to data points from studies that used dosages larger or smaller than the standard dose of 5 tuberculin units per test dose of 0.1 ml, by entering them as z-covariates in DisMod.

### *Modeling TB incidence*

Incidence inputs were from two different sources: (1) incidence from notification data for countries with a four or five-star rating on their cause of death data<sup>4</sup> as a proxy for the quality of health-related administrative data systems, and (2) estimated incidence for countries with a less than four-star rating. We used the age and sex-specific notifications (all new and relapse cases combined) in our analysis. Prior to 2013, notification data were available by case type (new pulmonary smear-positive, new pulmonary smear-negative, and new extra-pulmonary) and there were missing age data especially for younger age-groups in some countries. We imputed the missing age-groups for the three forms of TB notifications. Smear-positive age-specific notifications were inflated with the proportion smear-unknown and relapsed cases only reported at the country-year level. Some countries reported only pulmonary smear-positive cases for selected years. Missing smear-negative and extra-pulmonary cases were predicted from the adjusted smear-positive cases using a seemingly unrelated regression. All three types of notifications were added together to represent TB-all form incidence for countries with a four or five-star rating.

To generate incidence estimates for locations with a less than four-star rating, we ran a regression using MI ratios (logit transformed) from locations with a 4 or 5-star rating on causes of death as input data with SDI as a covariate anchoring the lower end of the SDI scale with a data point from a cohort study in the 1960s<sup>2</sup> reporting that 49.2% of 126 untreated new pulmonary TB cases were dead at the end of the 5-year follow up period, in order to predict age-sex specific MI ratios for all locations and years. We then

used the predicted MI ratios and cause specific mortality estimates to compute age-sex specific incidence estimates for locations with a less than four-star rating. For South Africa, a country with large inequality, we decided that the Health Care Access and Quality (HAQ) index would be a better health-related index than SDI for TB, a health outcome that differentially affects the poor. We therefore used the HAQ index instead, to predict incidence for South Africa. While the MI-ratios predicted using the SDI covariate were within a reasonable range for most countries with a less than four-star rating, there were some outliers with very high MI ratios. We replaced those MI ratios with the MI ratios computed based on notifications and CSMR for 2010. For outliers in other years, we assumed a similar proportional difference between predicted MI ratios and notifications-based MI ratios as in 2010 and adjusted the predicted MI ratios accordingly, which were then used to predict incidence.

We computed the age-sex specific incidence of TB among the latent TB-infected population, using TB incidence as the numerator and our estimated risk-weighted latent TB infection prevalence as the denominator. We included location-level covariates, namely, the age-standardized adult underweight prevalence, and the log-transformed age-standardized SEV scalar for TB to help inform variation over year and location. We set bounds of 0.75 to 1.25 on the SEV scalar covariate where a value in log space of 1 would reflect perfect agreement with our risk factor estimates.

### *Modeling TB prevalence*

Data from prevalence surveys reporting on pulmonary smear-positive TB and bacteriologically positive TB were included. Because incidence data are for all forms of TB, we adjusted prevalence surveys to account for extra-pulmonary cases. We ran a spatiotemporal Gaussian process regression to predict location-year-age-sex specific proportions of extra-pulmonary TB among all TB cases using data on the three forms of TB from the incidence data above. We then computed the extra-pulmonary inflation factor as  $1 + (\text{proportion of extrapulmonary TB} / (1 - \text{proportion of extrapulmonary TB}))$ , and applied it to data from prevalence surveys. We then computed the prevalence of TB among the TB-infected population, using TB prevalence as the numerator and our estimated risk-weighted LTBI prevalence as the denominator. We included a study covariate indicating whether it was bacteriologically positive TB (reference category) or smear-positive TB. We found no systematic bias between studies that used both symptoms and chest X-ray as screening methods and studies that used only one of the methods. We therefore did not adjust them for systematic bias but added more uncertainty to data points from studies that used only one of the screening methods (by using it as a z-covariate in Dismod). We also added more uncertainty to data points from sub-national surveys. We included the SEV scalar country-level covariate with priors that as the SEV scalar increases, prevalence increases.

### *Modeling TB excess mortality*

We matched each prevalence data point and TB CSMR (TB and HIV-TB combined) by location, year, age, and sex to calculate excess mortality rate (EMR) as  $EMR = CSMR / prevalence$ . We also matched each incidence data point and TB CSMR by location, year, age, and sex to calculate EMR for countries with a four or five-star rating on their cause of death data. To reflect a gradient in EMR, we added the HAQ index, and adult HIV death rates as country-level covariates.

## DisMod-MR 2.2

For each location, we included the following as input in the DisMod model: case notifications for locations with a four or five-star rating, predicted MI-ratio-based incidence for locations with a less than four-star rating, prevalence survey data where available, excess mortality estimates, and CSMR (TB and HIV-TB combined) by age and sex.

The output from the DisMod model was for all forms of TB in TB-infected population including both HIV-negative and HIV-positive individuals. We computed the incidence and prevalence of TB among the entire population, by multiplying the prevalence of LTBI with the DisMod model estimates.

Betas and exponentiated values from the DisMod model are shown in the table below.

| Covariate                                     | Parameter        | Beta (95% CI) | Exponentiated beta (95% CI) |
|-----------------------------------------------|------------------|---------------|-----------------------------|
| Smear positive TB                             | Prevalence       | -0.75         | 0.47 (0.47 — 0.47)          |
| Sex (male)                                    | Prevalence       | 0.51          | 1.66 (1.55 — 1.79)          |
| Sex (male)                                    | Incidence        | 0.13          | 1.14 (1.14 — 1.14)          |
| Age-standardized proportion adult underweight | Incidence        | 2.23          | 9.35 (8.73 — 9.72)          |
| Age-standardized proportion adult underweight | Prevalence       | 2.95          | 19.13 (17.32 — 20.07)       |
| Age-standardized SEV scalar (log-transformed) | Prevalence       | 0.78          | 2.19 (2.12 — 2.39)          |
| Age-standardized SEV scalar (log-transformed) | Incidence        | 0.75          | 2.12 (2.12 — 2.12)          |
| HAQ (log-transformed)                         | Excess mortality | -1.58         | 0.21 (0.19 — 0.22)          |
| Adult HIV death rate                          | Excess mortality | 0.96          | 2.61 (1.04 — 7.02)          |

## HIV-TB incidence and prevalence

To distinguish HIV-TB from all forms of TB, we first estimated the proportions of HIV-TB cases among all TB cases using data on the number of TB cases recorded as HIV-positive and the number of TB cases with an HIV test result recorded in the WHO TB notifications register. We ran a mixed effects regression using the adult HIV death rate as a covariate to predict location-year specific HIV-TB proportions, which were then applied to TB incident and prevalent cases from DisMod, to generate HIV-TB incident and prevalent cases by location and year. These cases were then age-sex split based on the age-sex pattern of estimated HIV prevalence by location-year to generate location-year-age-sex specific HIV-TB incident and prevalent cases.

### *Multidrug-resistant TB, extensively drug-resistant TB and drug-susceptible TB*

We ran a spatiotemporal Gaussian process regression to predict the proportions of MDR-TB cases among all TB cases for all locations and years. The input data for this regression (i.e., weighted average of the proportions of new and previously treated cases with MDR-TB) were based on the number of MDR-TB cases among new TB cases, MDR-TB cases among previously treated TB cases, and the number of new and previously treated TB cases with drug sensitivity testing for isoniazid and rifampicin from routine surveillance and surveys reported to the World Health Organization. We then used the predicted proportions to MDR-TB cases among all TB cases, along with the HIV-TB and TB no-HIV incidence estimates, and the relative risk of MDR-TB associated with HIV infection from the literature<sup>1</sup> to compute the proportions of MDR-TB cases among HIV negative TB cases ( $PnoHIV_{c,y,a,s}$ ) by location, year, age, and sex using the following formula:

$$PnoHIV_{c,y,a,s} = \frac{MDR_{c,y}}{\left(1 + \left(RR \frac{HIVTB_{c,y,a,s}}{TBnoHIV_{c,y,a,s}}\right)\right) TBnoHIV_{c,y,a,s}}$$

where  $MDR_{c,y}$  is the number of all MDR-TB cases among HIV-positive and HIV-negative individuals by location and year,  $RR$  is the relative risk of MDR-TB associated with HIV infection,  $HIVTB_{c,y,a,s}$  is the number of HIV-TB incident cases by location, year, age, and sex, and  $TBnoHIV_{c,y,a,s}$  is the number of TB no-HIV incident cases by location, year, age, and sex.

We then applied the predicted proportions of MDR-TB cases among HIV negative TB cases to our predicted HIV-negative TB incident and prevalent cases to generate MDR-TB incident and prevalent cases by location, year, age, and sex. Next, we subtracted MDR-TB cases from all HIV-negative TB cases to generate drug-susceptible TB cases by location, year, age, and sex. To distinguish XDR-TB from MDR-TB, we aggregated the XDR-TB cases and MDR-TB cases (with drug sensitivity testing for second-line drugs) up to the super-region level and calculated the super-region level proportions of XDR-TB among MDR-TB cases, which were then applied to MDR-TB cases in corresponding countries within the super-regions to produce XDR-TB cases by location, year, age, and sex. We linearly extrapolated XDR-TB prevalence and incidence back assuming the rates were zero in 1992, one year before 1993 when XDR-TB was first recorded in USA surveillance data.<sup>5</sup> Finally, we subtracted XDR-TB cases from MDR-TB cases to generate MDR-TB (without XDR) cases by location, year, age, and sex.

### *Multidrug-resistant HIV-TB, extensively drug-resistant HIV-TB and drug-susceptible HIV-TB*

To split HIV-TB into MDR-HIV-TB and drug-susceptible HIV-TB, we first calculated the proportions of MDR-HIV-TB among all HIV-TB cases ( $PHIV_{c,y,a,s}$ ) for each location, year, age, and sex using the following formula:

$$PHIV_{c,y,a,s} = PnoHIV_{c,y,a,s}RR$$



where  $P_{noHIV_{c,y,a,s}}$  is the proportions of MDR-TB among all HIV-negative TB cases for each location, year, age, and sex and  $RR$  is the relative risk of MDR-TB associated with HIV infection. We then applied the predicted proportions of MDR-TB cases among HIV-TB cases to all HIV-TB case estimates to generate MDR-HIV-TB cases by location, year, age, and sex. Next, we subtracted MDR-HIV-TB cases from all HIV-TB cases to generate drug-susceptible HIV-TB cases by location, year, age, and sex. To separate out XDR-HIV-TB from MDR-HIV-TB, we applied the super-region level proportions of XDR-TB among MDR-TB cases, to MDR-HIV-TB cases in corresponding countries within the super-regions to produce XDR-HIV-TB cases by location, year, age, and sex. We linearly extrapolated XDR-HIV-TB prevalence and incidence back assuming the rates were zero in 1992, one year before 1993 when XDR-TB was first recorded in USA surveillance data.<sup>5</sup> Finally, we subtracted XDR-HIV-TB cases from MDR-HIV-TB cases to generate MDR-HIV-TB (without extensive drug resistance) cases by location, year, age, and sex.

### Disability weights

The lay descriptions and disability weights for severity levels derived from the GBD Disability Weights study are shown below.

| Health state Name              | Lay description                                                                                                  | Disability Weights (95% CI) |
|--------------------------------|------------------------------------------------------------------------------------------------------------------|-----------------------------|
| Tuberculosis, not HIV infected | has a persistent cough and fever, is short of breath, feels weak, and has lost a lot of weight                   | 0.333 (0.224-0.454)         |
| Tuberculosis, HIV infected     | has a persistent cough and fever, shortness of breath, night sweats, weakness and fatigue and severe weight loss | 0.408 (0.274-0.549)         |

For drug-susceptible TB, MDR-TB without extensive drug resistance, and XDR-TB, we used the same disability weight [0.333 (0.224-0.454)] as in non-HIV-infected TB. For drug-susceptible HIV-TB, MDR-HIV-TB without extensive drug resistance, and XDR-HIV-TB, we used the same disability weight [0.408 (0.274-0.549)] as in HIV-infected TB.

### Reference

1. Mesfin YM, Hailemariam D, Biadgign S, Kibret KT. Association between HIV/AIDS and multi-drug resistance tuberculosis: a systematic review and meta-analysis. *PLoS One*. 2014 Jan 8;9(1):e82235.
2. Institute NT. Tuberculosis in a rural population of South India: a five-year epidemiological study. *Bulletin of the World Health Organization*. 1974;51(5):473.
3. Markowitz N, Hansen NI, Hopewell PC, Glassroth J, Kvale PA, Mangura BT, Wilcosky TC, Wallace JM, Rosen MJ, Reichman LB. Incidence of tuberculosis in the United States among HIV-infected persons. *Annals of internal medicine*. 1997 Jan 15;126(2):123-32.
4. GBD 2016 Mortality and Causes of Death Collaborators. Global, regional, and national age-sex specific mortality for 264 causes of death, 1980–2016: a systematic analysis for the Global Burden of Disease Study 2016. *The Lancet* (under review)
5. Centers for Disease Control and Prevention (CDC). Extensively Drug-Resistant Tuberculosis --- United States, 1993–2006. *MMWR*. 2007; 56(11);250-253

# HIV/AIDS

## Flowchart

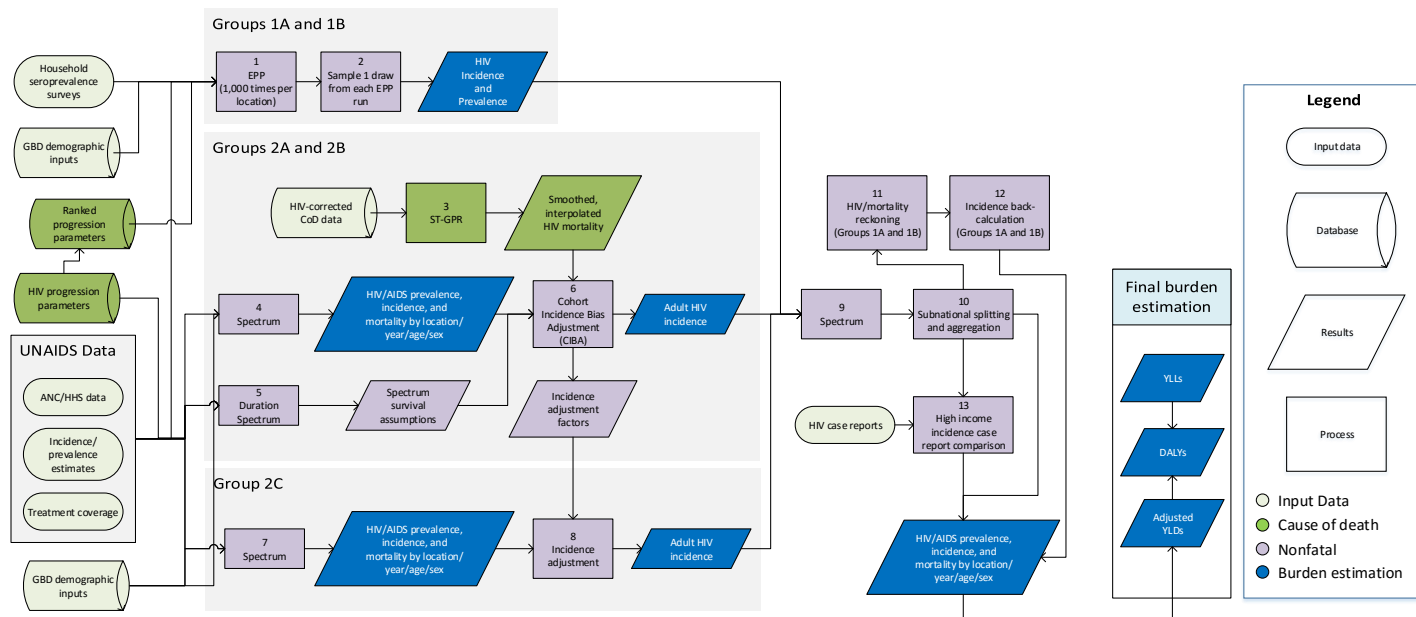

## Case definition

Infection with the human immunodeficiency virus (HIV) causes influenza-like symptoms during the acute period following infection and can lead to acquired immunodeficiency syndrome (AIDS) if untreated. HIV attacks the immune system of its host, leaving infected individuals more susceptible to opportunistic infections like tuberculosis. Although there are two different subtypes of HIV, HIV-1 and HIV-2, no distinction is made in our estimation process or presentation of results. For HIV, ICD 10 codes are B20-B24, C46-C469, D84.9; ICD 9 codes are 042-044, 112-118 (after 1980), 130 (after 1980), 136.3-136.8 (after 1980), 176.0-176.9 (after 1980), 279 (after 1980); and ICD9 BTL codes are B184-B185.

## Input data

### Model inputs

#### Household seroprevalence surveys

Geographically representative HIV seroprevalence survey results were used as inputs to the model for countries with generalized HIV epidemics where available.

#### GBD demographic inputs

Location-specific population, fertility, and HIV-free survival rates from GBD 2016 and migration data from UNAIDS were used as inputs in modeling all locations.

## UNAIDS data

The files compiled by UNAIDS for their HIV/AIDS estimation process were our main source of data for producing estimates of HIV burden. These files are typically country-specific and contain both demographic data (population, fertility, migration, and HIV-free survival rates) and HIV-specific information. In all cases except migration, we substituted in our own, internally consistent demographic estimates. The HIV-specific information includes what is needed to run both the Spectrum and Estimation and Projection Package (EPP) models. Spectrum requires data on AIDS mortality among people living with HIV with and without ART, CD4 progression among people living with HIV not on ART, ART coverage among adults and children, coverage of breastfeeding among women living with HIV, prevention of mother-to-child transmission coverage, and CD4 thresholds for treatment eligibility. EPP uses many of the same assumptions as Spectrum but fits a simpler model to HIV prevalence data from surveillance sites and large household surveys. Antenatal care, incidence, prevalence, and treatment coverage data from UNAIDS were used in modeling for all locations. We extracted all of these data from UNAIDS' proprietary formats.

For GBD 2016, we received national-level files for 81 countries and subnational-level files for 6 countries. For many of the GBD locations not covered by these files, we had UNAIDS files from an earlier year of estimation, which we used again. After combining, we were left with a set of 42 countries for which we have never received a UNAIDS file, many of them countries with small populations and/or low HIV prevalence. In those places, we generated regional averages of all needed inputs. This enabled us to run Spectrum for every GBD location.

In several cases, we have modified the structure or data in the UNAIDS files. In South Africa, which we have estimated at the province level since GBD 2015, we split the national-level UNAIDS file into nine provincial datasets. We used GBD 2016 demographic inputs for the provinces. These provinces are already fit as separate subpopulations in EPP, so we extracted the prevalence data for the individual provinces and assumed national rates for all other Spectrum inputs. In some locations that are estimated only at the national level in GBD 2016, we received subnational files from UNAIDS. In these cases, we split GBD 2016 demographic input data using the subnational relative relationships found in the UNAIDS files. Additionally, we identified that the ratio of fertility in HIV-positive women to HIV-negative women was negative in Indonesia. We used linear extrapolation to replace this value.

## Vital registration data

We used all available sources of vital registration and sample registration data from the GBD Causes of Death database after garbage code redistribution and HIV/AIDS mis-coding correction, except in Group 1A countries as described below.<sup>1,2</sup> There are two different cause of death data sources for HIV/AIDS in China: the Disease Surveillance Point (DSP) system and the Notifiable Infectious Disease Reporting (NIDR) system. Both systems are administered by the Chinese Center for Disease Control and Prevention, but the reported number of deaths due to HIV is significantly lower in DSP. Therefore, we have used the provincial-level ratio of deaths due to HIV/AIDS from NIDR to those from DSP, choosing the larger ratio between years 2013 and 2014, and scaled the reported deaths in the DSP system, which is in turn used in the Space-Time Gaussian Process Regression (ST-GPR) process.

### On-ART literature data

Data were identified by using search terms “HIV,” “mortality,” and “antiretroviral therapy” in PubMed searches across the literature. To be included, studies must include only HIV-positive people who receive antiretroviral therapy (ART) but who were ART-naïve prior to the study. In addition, studies must report either a duration-specific mortality proportion or a hazard ratio across age or sex, and must not include children.

For duration-specific survival data, studies must report uncertainty on mortality estimates or provide stratum-specific sample sizes and must include duration-specific data to allow for calculation of 0-6, 7-12, or 13-24 month conditional mortality. In addition, studies must either report separate mortality and loss-to-follow-up (LTFU) curves, be corrected for LTFU using vital registration data, or be conducted in a high-income setting. Finally, studies must report the percent of participants who are male, the median age of participants, and either data with specific data on the number of CD4 T lymphocytes (CD4 counts) or the median CD4 count used for the data.

Hazard ratio data for ages or sexes can only be used if the hazard ratios are controlled for other variables of interest (age, sex, and CD4 category).

In GBD 2013, we identified 102 papers for extraction. For GBD 2015, we included 13 additional studies informing the duration-specific mortality estimation process and 26 studies informing the age and sex hazard ratio estimation process (some studies were used and counted in both). We also added one study to our LTFU analysis. For GBD 2016, we included 12 additional studies informing the duration-specific mortality estimation process and 11 studies informing the age and sex hazard ratio estimation process (some studies were used and counted in both).

### Off-ART literature data

In GBD 2013, to characterize uncertainty in the progression and death rates, we systematically reviewed the literature on mortality without ART. We searched terms related to pre-ART or ART-naïve survival since seroconversion.<sup>3</sup> After screening, we identified 13 cohort studies that included the cohorts used by UNAIDS from which we extracted survival at each one-year point after infection. Screening for additional, recently published studies in GBD 2015 and GBD 2016 identified no new cohort studies for inclusion in this analysis.

### *Severity splits & disability weights*

The basis of the GBD disability weight survey assessments are lay descriptions of sequelae highlighting major functional consequences and symptoms. The lay descriptions and disability weights for HIV/AIDS severity levels are shown below.

| Severity level                        | Lay description                                                                                                 | DW (95% CI)            |
|---------------------------------------|-----------------------------------------------------------------------------------------------------------------|------------------------|
| Symptomatic HIV                       | has weight loss, fatigue, and frequent infections.                                                              | 0.274<br>(0.184-0.377) |
| AIDS with antiretroviral treatment    | has occasional fevers and infections. The person takes daily medication that sometimes causes diarrhea.         | 0.078<br>(0.052-0.111) |
| AIDS without antiretroviral treatment | has severe weight loss, weakness, fatigue, cough and fever, and frequent infections, skin rashes, and diarrhea. | 0.582<br>(0.406-0.743) |

The proportion of people living with HIV/AIDS who are being treated with anti-retroviral therapy is an output of Spectrum, the compartmental model used to make consistent incidence, prevalence, and mortality estimates described below.

## Modeling strategy

In GBD 2016, our general modeling strategy for estimating HIV incidence, prevalence, and mortality is very similar to the strategy used in GBD 2015. We continue to use the Spectrum program rewritten in Python for GBD 2013 to facilitate faster and more flexible execution necessary for our more intensive computational needs. We made several changes to Spectrum's assumptions comparing to the Spectrum software used by UNAIDS. We also again ran EPP using an open-source computer program in R written by Jeffrey Eaton.<sup>4</sup> We ran EPP for all Group 1 countries in order to produce incidence and prevalence estimates that were consistent with the demographic and epidemiological assumptions used in GBD 2016.

## On-ART

First, we corrected reported probabilities of death for loss to follow-up using an update of the approach developed by Verguet and colleagues.<sup>5</sup> Verguet and colleagues used tracing and follow-up studies to empirically estimate the relationship between death in LTFU and the rate of LTFU.

To create estimates of age-specific hazard ratios, we synthesized hazard ratio data in five broad age groups: 15-25, 25-35, 35-45, 45-55, 55-100, and modeled the data using DisMod-MR 2.0.

To create estimates of sex-specific hazard ratios, we use the *metan* function in Stata to create estimates of relative risks separately by region, using female age groups as the reference group.

The age and sex hazard ratios were applied to the study level mortality rates, accounting for the distribution of ages and sexes in the mortality data. We then subtracted HIV-free mortality from the model life table process to calculate study level age-sex HIV-specific mortality.

We used DisMod-MR 2.0 to synthesize the age-sex split study level data into estimates of conditional probability of death over initial CD4 count.<sup>3</sup> We modeled the data separately by duration, age, and sex and added a fixed effect on whether the study was conducted prior to 2002. We estimated all three regions together using a fixed effect for each region.

## Changes for GBD 2016

In GBD 2016, we chose to age-sex split the data at the study level so that we could consider study-specific age-sex distributions, whereas previous GBD iterations relied upon region-specific distributions. Another change was a switch to estimating all regions together with fixed effects for each region. This allowed us to impart a CD4 trend in sub-Saharan Africa and other developing country estimates that led to more realistic estimates in the high CD4 categories where little data was available from those regions.

## Off-ART

Following UNAIDS assumptions, no-ART mortality is modeled as shown in the figure below.<sup>3</sup>

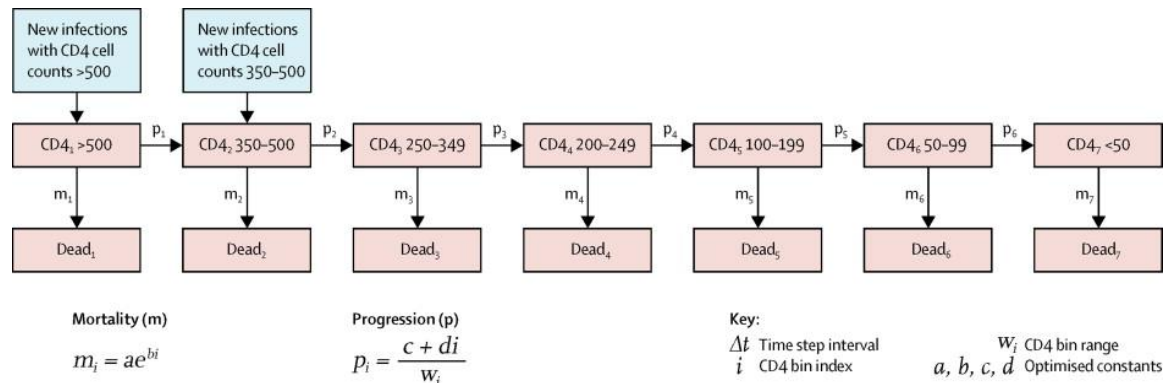

The death and progression rates between CD4 categories vary by age according to four age groups: 15–24 years, 25–34 years, 35–44 years, and 45 years or older. We modeled the logit of the conditional probability of death between years in these studies using the following formula:

$$\text{logit}(m_{ijk}) = \beta_0 + \sum_{i=1}^4 \beta_{1i} a_i + \sum_{j=1}^{12} \beta_{2j} t_j + u_k + \varepsilon_{ijk}$$

In the formula,  $m$  is conditional probability of death from year  $t_j$  to  $t_{j+1}$ ,  $a_i$  is an indicator variable for age group at seroconversion (15–24 years, 25–34 years, 35–44 years, and 45 years or older),  $t_j$  is an indicator variable of year since seroconversion, and  $u_k$  is a study-level random effect.

By sampling the variance-covariance matrix of the regression coefficients and the study-level random effect, we generated 1,000 survival curves for each age group that capture the systematic variation in survival across the available studies. For each of the 1,000 survival curves, we used a framework modeled after the UNAIDS optimization framework in which we find a set of progression and death rates that minimizes the sum of the squared errors for the fit to the survival curve.<sup>6,7</sup>

### Burden estimation overview

UNAIDS uses two key analytical components in their epidemiological estimation. EPP is used to estimate incidence trajectories that are consistent with prevalence surveys and other prevalence measurements such as antenatal clinic serosurveillance. Spectrum is a compartmental HIV progression model used to generate age-specific incidence, prevalence, and death rates from the EPP incidence curves and assumptions about intervention scale-up and local variation in epidemiology.

For GBD 2013, we created an exact replica of Spectrum in Python. This enabled us to run thousands of iterations of the model at once on our computing cluster and allowed for more flexible input data structures. Additionally, in order to generate estimates with more realistic ranges of uncertainty than those in UNAIDS 2012, we adjusted all input data by uniformly sampled factors between 0.9 and 1.1. These changes, along with our new estimation of with- and without-ART mortality and CD4 progression parameters, persist into GBD 2016.

Due to the substantial differences in the quality and types of data available across different countries, we used three different methodologies to produce year-, age-, and sex-specific estimates of HIV incidence, prevalence, and mortality.

## Countries with seroprevalence surveys and antenatal clinic data (Groups 1A and 1B)

We identified 50 countries – as well as subnational locations in India, Kenya, and South Africa – with at least 0.5% adult HIV prevalence and at least one geographically representative HIV seroprevalence survey or available antenatal care clinic (ANC) data. In order to ensure that our estimates of incidence and prevalence in these places were consistent with our estimates of HIV progression, we used a version of EPP written in R and C++ by Jeffrey Eaton to create new fits to the available prevalence data. The version of EPP used in GBD 2016 was an updated release from Jeffrey Eaton since completion of GBD 2015. In this new version, an ANC prevalence adjustment was included and incorporated with the 2016 lookup database and an additional parameter to estimate ANC variance inflation was included as well. In the ANC bias adjustment, instead of using the default universal assumption of the prior mean and standard deviation (SD) of the distribution that the adjustment follows, we selected the parameters based on each sub-population (general population and high risk population) in each location. For sub-populations with prevalence survey data, we used the default assumption with mean=0.15 and SD=1. For subpopulations without prevalence survey data, we chose the region/epidemic specific mean and SD based on the median probit difference and probit difference SD in Table 1 of Marsh et al.<sup>8</sup>

India's HIV epidemic is classified as concentrated in specific subpopulations rather than generalized to the full population, and only one prevalence survey, the 2005-2006 National Family Health Survey (NFHS-3), was available, so we used modified parameters for Indian states in EPP. We first calculated the mean of the median probit difference between men and women for "Countries with concentrated epidemics" in Table 1 of March et al as mentioned above, which was 0.245. Then we derived empirical parameters based on the difference between the ANC data and the NFHS-3 survey data in probit space to use for the general population. Specifically, we calculated the probit difference by taking the median of all raw ANC prevalence in years 2004 through 2006 and comparing to the 2005 prevalence survey data in probit space for three states with large HIV epidemics: Andhra Pradesh, Karnataka, and Maharashtra. From this empirical parameter derivation, we got the mean and SD value based on the three states as 0.124 and 0.051, respectively. We then used linear interpolation between the prevalence with a prior of 0.245 and the new prior of 0.124 to recalculate the mean and keep the SD the same as the empirical estimates. The final assumption of the prior mean and SD were 0.182 and 0.051, respectively. We did not make any adjustments for high risk populations.

In the new version of EPP, in addition to the equilibrium prior assumption of the force of infection in projection, a random walk approach is available as an alternative method. For locations with two or more prevalence surveys and a declining trend between the mean of the most recent two surveys, the random walk approach was chosen to project the force of infection. We assumed the change of the log scaled force of infection was following a normal distribution with mean equal to the median of the change of the modeled force of infection among the years having ART implemented or prevalence data, and the SD was equal to the default setting as the mean SD of the change of the modeled force of infections among the years having prevalence data. The projection year was chosen from the most recent year between the year with the lowest model force of infection and the year of the second latest survey data.

For Indian states, we used the equally weighted draw-level estimates of the equilibrium prior and random walk assumptions since we had no further information to support either assumption for each state. Here, the projection year of the random walk was the year with the lowest modeled force of infection because no locations had more than one prevalence survey, and the assumption of increasing ART coverage was supported by the data available to us.

In the new EPP code, an optimization step was added into IMIS function to speed up the parameter sampling step based on Raftery and Bao.<sup>9</sup> Two optimization methods have been introduced. The main algorithm is Broyden–Fletcher–Goldfarb–Shanno (BFGS) optimization. If BFGS fails, Nelder-Mead optimum is used instead. In our 2016 EPP model, by substituting in our own assumptions about HIV progression rates and on/off ART mortality, we were able to ensure that the implied relationship between incidence and mortality/prevalence in EPP is similar to that in Spectrum.

In Group 1 locations, we expect estimates of HIV burden to exhibit substantial uncertainty. To reflect this, we induced a perfect correlation between the previously independent draws of HIV mortality with and without ART and CD4 progression. We paired the draws of the three parameter sets internally and with each other in the following way: we sorted without-ART mortality and CD4 progression internally by age (not CD4), meaning the highest draw of HIV mortality without ART for age  $a_i$  and CD4 category  $c_i$  will be paired with the highest draw of HIV mortality without ART for age  $a_k$  and CD4 category  $c_i$ . In the same way, we sorted with-ART mortality internally by age, sex, CD4 count at treatment initiation, and duration on treatment. After this sorting process, the lowest indexed draw of each parameter has the highest values and vice versa. This means that we will use the most extreme possible parameter sets in EPP and Spectrum and should see a commensurate expansion in the range of the uncertainty.

To ensure that this expanded uncertainty is replicated in EPP, we fit the model once for every set of paired draws of the progression parameters for every location. This means that the first iteration of EPP for Uganda sees the highest draws of all three sets of progression parameters. Such a procedure is necessary because EPP currently has no mechanism for incorporating uncertainty in any inputs except prevalence data. This process (Process 1 in the HIV/AIDS Estimation Flowchart), produced 1,000 sets of EPP output for each of the locations that make up the 48 countries in the group. Every set of EPP outputs contains 500 consistent draws of HIV incidence and prevalence in adults aged 15-49. In many cases, the algorithm used to fit EPP, incremental mixture importance sampling, failed, resulting in fewer than 1,000 sets of EPP results.

For every location in the group, we sampled one of the 500 incidence/prevalence draws from each of the sets of EPP results (Process 2 in the HIV/AIDS Estimation Flowchart). By sampling one draw from each set, we ensured that the distribution of progression parameters dictating the relationship between incidence and prevalence was exactly the same as the distribution of the sorted parameters generated in the previous step. In locations where not all 1,000 iterations of EPP fit successfully, we sampled one draw from every iteration that did succeed and then resampled with replacement from that set of draws. To maintain the link between the input progression draws and the resulting incidence and prevalence draws from EPP, we replaced any parameter draw associated with a failed run of EPP with the parameter draw that that failed draw was replaced with. At the end of this process, for every location in the set of 48 countries, we were left with 1,000 linked draws of adult incidence and prevalence and the exact progression parameters that generated those draws.

We then ran these results, along with the previously described demographic and HIV-specific inputs, through Spectrum to produce location-, year-, age-, and sex-specific estimates of HIV incidence, prevalence, and mortality (Process 9 in the HIV/AIDS Estimation Flowchart).

The HIV/mortality reckoning process (Process 11 on the HIV/AIDS Estimation Flowchart) is intended as a method of reconciling separate estimates of HIV mortality (and its resulting effect on estimates of HIV-free and all-cause mortality) in Group 1 countries by averaging estimates of HIV mortality from the model



life table process and EPP-Spectrum. Additional details on the reckoning can be found in the GBD 2016 mortality manuscript.<sup>10</sup>

Since Spectrum produces HIV incidence, prevalence, and deaths that are consistent with one another over time, the reckoning process results in death numbers that are no longer consistent with the incidence and prevalence produced in Spectrum. In order to recreate this consistency, we recalculated incidence for all Group 1 locations using reckoned deaths and prevalence produced by Spectrum (Process 12 on the HIV/AIDS Estimation Flowchart). The updated incidence is calculated by aggregating counts of people living with HIV (PLWH), new infections, and deaths (among PLWH from HIV and other causes) at the year-sex level and calculating the following ratio for each sex:

$$r_t = \frac{[(PLWH_t - PLWH_{t-1}) + (Deaths_{hiv,t} + Deaths_{background,t})]}{NewHIV_t}$$

Age-specific counts of new infections are then scaled by their corresponding sex-year ratios.

### Countries with vital registration data (Group 2A and 2B)

Vital registration is one of the highest-quality sources of data on HIV burden in many countries, so generating estimates that are consistent with these data, with necessary adjustment to account for any potential underreporting, is critical. We identified 114 countries – as well as 440 subnational locations from Brazil, China, Japan, Indonesia, Mexico, Sweden, the United Kingdom, and the United States – with at least two usable points of vital registration data, verbal autopsy (VA) data, or sample registration system (SRS) data. In India and Indonesia, we used SRS and VA data, respectively, as input mortality for CIBA. For India we extracted the resulting age-sex distribution of incidence, but scaled the level to match the adult incidence rate estimated from EPP for each state.

We imputed missing years of data to generate a complete time series for HIV from the estimated start year of the epidemic using ST-GPR. We analyzed mortality trends using ST-GPR starting in 1981, the year that HIV was first identified in the United States.<sup>11</sup> For ST-GPR, we adjusted the lambda (time weight) and GPR scale according to the completeness of vital registration data, with 4- and 5-star quality VR using parameters designed to follow the data more closely. We produced separate splines by country/age group, up to the peak year of death rate. We then ran a linear regression with random effects on region, age, and sex. Following this, we ran space-time residual smoothing, in which time, age, and space weights are used to inform smoothing of the residuals between data points and the linear regression estimate. From this process, we generated space-time estimates with the applied weights, along with the median absolute deviation (MAD) of the space-time estimates from the data. The MAD was calculated at various levels of the location hierarchy (e.g., subnational and national), and was added into the data variance term. The data variance and space-time estimates were then analyzed using Gaussian Process Regression to return a final estimate of mortality along with uncertainty.

Although Spectrum produces HIV mortality estimates that are within the realm of possibility in most countries using the incidence curves provided in the UNAIDS country files, it is a deterministic model that has not yet been integrated into an optimizable framework. Therefore, in order to “fit” it to vital registration data, we need to adjust input incidence.

To improve the fit of this process, in GBD 2015, we restructured Spectrum to add compartments that identify groups of people living with HIV by year of infection (Process 5 in the HIV/AIDS Estimation Flowchart). With this version of Spectrum we can output, among many other metrics, HIV deaths by year, age, sex, and infection cohort. This enables us to adjust incidence to fit to death much more precisely and without making any rigid assumptions about the time from HIV infection to HIV death.

We have incorporated these improvements into a cohort incidence bias adjustment (CIBA) process. First, we ran Spectrum normally to produce 1,000 draws of incidence, prevalence and mortality (Process 4 in the HIV/AIDS Estimation Flowchart). Then, by year, age, and sex, we took the ratio of VR deaths to Spectrum deaths to quantify the amount of bias in Spectrum. Using draw-level duration data from the new version of Spectrum, for every year-, age-, and sex-specific infection cohort, we calculated the share of all HIV deaths observed over the course of the projection period in that cohort that would occur in each year after the year of infection. For example, projecting from 1970 through 2016, we identified the cohort of men infected in 1992 at the age of 16, calculated the total number of HIV deaths in that cohort in all subsequent years through the end of 2016, and divided the annual number of deaths by that total. This showed us the distribution of deaths among that cohort over the projection period. In the most extreme case (infections in 2015), we could only produce one point of that distribution (2016), so that single value is exactly 1-0; 100% of the deaths observed in that cohort occurred in 2016.

We then used these distributions of death to weigh the ratio of VR deaths to Spectrum deaths, meaning that ratios in the years where we expect the largest share of deaths were weighed most heavily. We then multiplied the initial size of that cohort from the normal run of Spectrum by the sum of the combined ratios to get a new estimate of new cases in that year/age/sex combination.

We can write this method mathematically in the following way:

$$r_t = \frac{VR_t}{D_t}$$

$$\rho_t^{t-i} = \frac{d_t^{t-i}}{\sum_{k=t-i+1}^n d_k^{t-i}}$$

$$\alpha^{t-i} = \sum_{k=t-i+1}^n r_k * \rho_k^{t-i}$$

$$n_{\text{adjusted}}^{t-i} = \alpha^{t-i} * n^{t-i}$$

$VR_t$  is the number of HIV/AIDS deaths in year  $t$  from ST-GPR, and  $D_t$  is the number of HIV/AIDS deaths from the first run of Spectrum. In the second equation,  $d_t^{t-i}$  is the number of HIV/AIDS deaths among members of infection cohort  $t - i$  in year  $t$ , with  $i \geq 1$ , from the new, duration-tracking version of Spectrum, and  $n$  is final year of the projection. Therefore,  $\rho_t^{t-i}$  is the share of observed deaths in cohort  $t - i$  that we expect to occur in year  $t$ . It follows that  $\alpha^{t-i}$  is the weighted adjustment ratio described above, which we multiply by the estimated initial size of infection cohort  $t - i$  as calculated in the first-stage Spectrum run to get the adjusted number of new cases,  $n_{\text{adjusted}}^{t-i}$ . This process is run separately for every sex, single-age, and draw.

CIBA (Process 6 in the HIV/AIDS Estimation Flowchart) allows ratios in each year after a given infection year to influence the final adjustment to incidence. The size of that influence is determined by the relative importance of that year in the cohort-year's distribution of deaths over time. The result is a new set of 1,000 draws of incidence and a set of 1,000 ratios of post-adjustment incidence to pre-adjustment incidence. We perform this adjustment using mean durations from the new version of Spectrum in order to try to shift the mean of the regular distribution of deaths.

Finally, to produce location-, year-, age-, and sex-specific estimates of HIV incidence, prevalence, and mortality, we ran the new estimates of incidence and all previously input data through Spectrum (Process 9 in the HIV/AIDS Estimation Flowchart).

### Countries without survey data and vital registration data (Group 2C)

The remaining 31 countries – as well as 14 subnational locations from China and Saudi Arabia – had neither geographically representative seroprevalence surveys nor reliable vital registration systems. To produce estimates of HIV burden in these countries, we assumed that Spectrum is similarly biased as in other Group 2 countries. This involved running Spectrum (Process 7 in the HIV/AIDS Estimation Flowchart), adjusting incidence using 1,000 adjustment ratios randomly sampled from the entire set of CIBA results (Process 8), and rerunning Spectrum using the new draws of adjusted incidence (Process 9). As above, the estimates of incidence, prevalence, and mortality were incorporated into the rest of the machinery via the reckoning process.

### Subnational splitting and aggregation

Spectrum results for India, Kenya, and UK subnational locations are modeled at higher levels of geography than our GBD locations. Spectrum results for India are produced at the state level, while GBD 2016 estimates were produced at the state urban-rural level; Spectrum models Kenya provinces, while we compute Kenyan estimates for 47 counties. Indonesia and the United Kingdom have Spectrum results at the national level, while GBD 2016 estimates Indonesian provinces and Upper Tier Local Authorities in the UK. To split the Spectrum results into more granular results for processing, we assign each GBD subnational unit to a Spectrum modeling unit. From this, we generate age/sex/year-specific proportions for population, HIV-specific death, and HIV-free mortality.

In Cote d'Ivoire, Haiti, Moldova, Mozambique, and Zimbabwe, the country files that we received from UNAIDS contained only subnational data without national-level aggregates. In these locations, we generated GBD 2016 demographic inputs for the provided subnational units using the proportions present in the UNAIDS files and ran the locations through EPP and Spectrum at the subnational level before aggregating to generate final national level GBD 2016 estimates. These aggregation and splitting steps are shown as Process 10 in the HIV/AIDS Estimation Flowchart.

### HIV/AIDS resulting in other diseases

There are two Level 4 causes under the HIV/AIDS Level 3 cause in the GBD 2016 cause hierarchy. The modeling process for HIV/AIDS-tuberculosis is detailed in another part of this appendix. We computed the number of people living with HIV resulting in other diseases by subtracting the number of people living with HIV/AIDS-tuberculosis from all people living with HIV/AIDS at the 1,000 draw level.

## References

- 1 Global, regional, and national age–sex specific all-cause and cause-specific mortality for 240 causes of death, 1990–2013: a systematic analysis for the Global Burden of Disease Study 2013. *The Lancet* 2015; **385**: 117–71.
- 2 Birnbaum JK, Murray CJ, Lozano R. Exposing misclassified HIV/AIDS deaths in South Africa. *Bull World Health Organ* 2011; **89**: 278–85.
- 3 Murray CJL, Ortblad KF, Guinovart C, *et al.* Global, regional, and national incidence and mortality for HIV, tuberculosis, and malaria during 1990–2013: a systematic analysis for the Global Burden of Disease Study 2013. *The Lancet* 2014; **384**: 1005–70.
- 4 jeffeaton/epp. GitHub. <https://github.com/jeffeaton/epp> (accessed April 21, 2016).
- 5 Verguet S, Lim SS, Murray CJL, Gakidou E, Salomon JA. Incorporating Loss to Follow-up in Estimates of Survival Among HIV-Infected Individuals in Sub-Saharan Africa Enrolled in Antiretroviral Therapy Programs. *J Infect Dis* 2013; **207**: 72–9.
- 6 Ghys PD, Zaba B, Prins M. Survival and mortality of people infected with HIV in low and middle income countries: results from the extended ALPHA network. *AIDS Lond Engl* 2007; **21 Suppl 6**: S1–4.
- 7 Hallett TB, Zaba B, Todd J, *et al.*, ALPHA Network. Estimating incidence from prevalence in generalised HIV epidemics: methods and validation. *PLoS Med* 2008; **5**: e80.
- 8 Marsh K, Mahy M, Salomon JA, Hogan DR. Assessing and adjusting for differences between HIV prevalence estimates derived from national population-based surveys and antenatal care surveillance, with applications for Spectrum 2013. *AIDS Lond Engl* 2014; **28 Suppl 4**: S497–505.
- 9 Raftery AE, Bao L. Estimating and Projecting Trends in HIV/AIDS Generalized Epidemics Using Incremental Mixture Importance Sampling. *Biometrics* 2010; **66**: 1162–73.
- 10 Wang H, Murray CJ, Carter A, He F. Global, regional, and national under-5 mortality, adult mortality, age-specific mortality, and life expectancy, 1970-2016: a systematic analysis for the Global Burden of Disease Study 2016. *The Lancet* 2017.
- 11 CDC. Pneumocystis Pneumonia --- Los Angeles. MMWR Wkly. 1981; published online June 5. [http://www.cdc.gov/mmwr/preview/mmwrhtml/june\\_5.htm](http://www.cdc.gov/mmwr/preview/mmwrhtml/june_5.htm) (accessed April 21, 2016).

# Diarrheal Diseases

## Flowchart

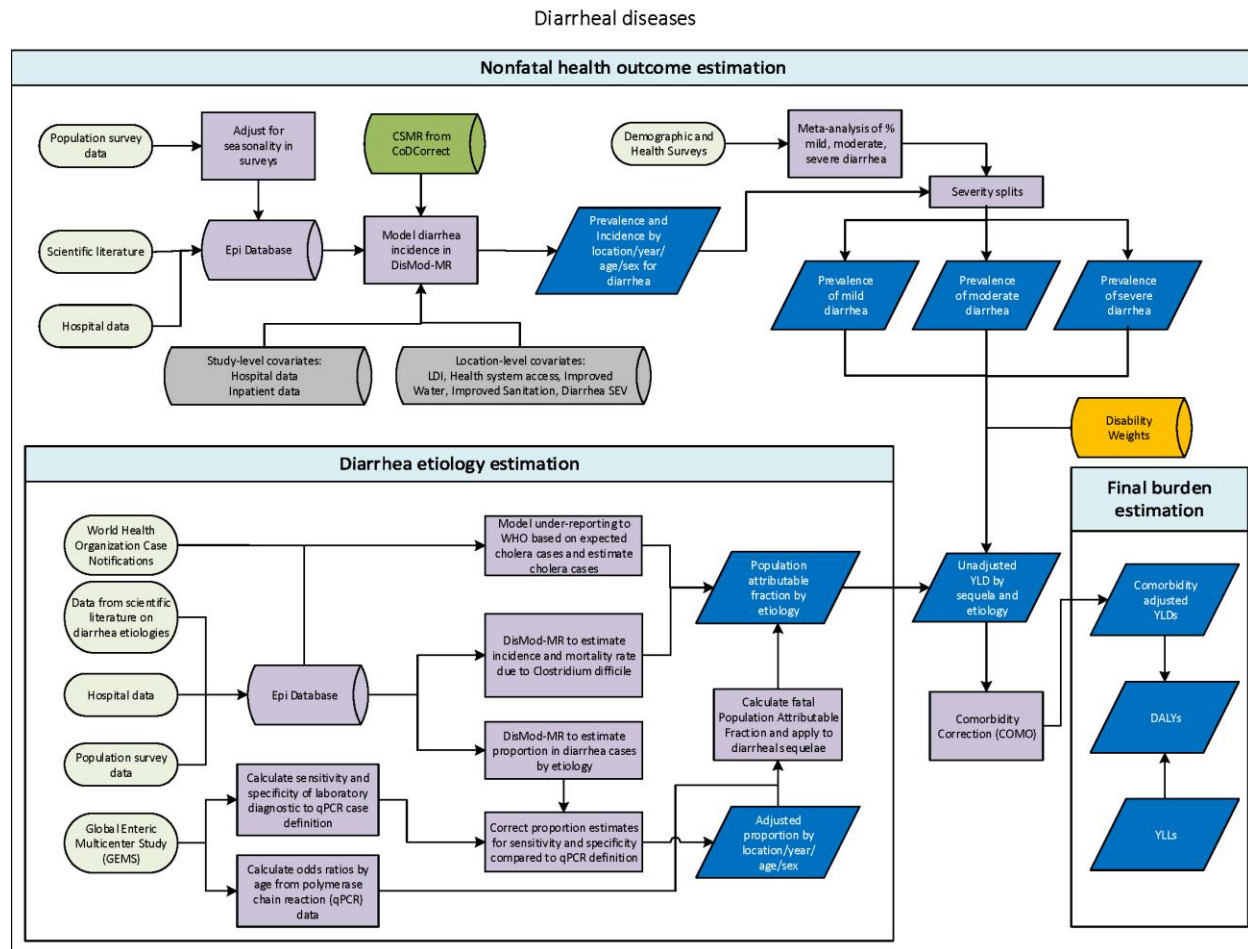

## Case definition

We defined diarrheal disease episodes as three or more loose stools in a 24-hour period. In the diarrhea models, self-reported prevalence is the reference category for all data adjustments. Hospital input data use ICD9 codes 001-009.9 and ICD10 codes A00-A09. We also split diarrhea episodes into three severity levels: mild, moderate, and severe.

## Input data

### Model inputs

We used two main types of data in the diarrhea non-fatal burden estimation and the attribution of diarrheal etiologies. Moreover, we included all data sources used in GBD 2015 and conducted new reviews of scientific literature, surveys, and hospitalization data. We presented a summary of the data sources in Table Data.

The first type of data is the incidence and prevalence of diarrhea in community and hospital settings. Hospital data and healthcare utilization data were identified using the ICD9 codes 001-009.9 and ICD10 codes A00-A09. To be consistent with the survey data, we transformed the hospital and healthcare data from incidence to prevalence. A summary of the data sources is found in **Table 1**. We used data from population-representative surveys, such as the Demographic and Health Surveys and the Multiple Indicator Cluster Surveys. We converted the prevalence of maternal-reported two-week period from surveys to point prevalence in one-year age increments this equation.

$$\text{Point Prevalence} = \text{Period Prevalence} * \frac{\text{Duration}}{(\text{Recall Period} + \text{Duration} - 1)}$$

Survey data were adjusted for seasonality. An inclusion criterion for scientific literature is a study duration longer than 1 year to avoid bias in the seasonal timing of diarrhea. Surveys are frequently conducted over several months. To account for seasonal variation in diarrhea prevalence, we fit a simple sine/cosine model for each GBD region. The model is mixed-effects with random effects on each site. The model accounts for the year of the survey. The percent difference between the monthly model fit diarrhea prevalence and the mean fitted diarrheal prevalence is a scalar to adjust survey data by month and location.

Diarrhea duration was updated based on a systematic review with spatial variation (**Table 2**).<sup>1</sup>

The second type of data describes diarrhea etiologies. We extracted data on all etiologies except *C. difficile* from scientific literature that reported the proportion of diarrhea cases that tested positive for each pathogen. We completed a systematic literature review covering the years May 2015 to May 2016 for diarrhea prevalence, incidence, and all diarrhea etiologies. Inclusion criteria included diarrhea as the case definition, studies with a sample size of at least 100, and studies with at least one year of follow-up. We excluded studies that reported on diarrheal outbreaks exclusively and those that used acute gastroenteritis with or without diarrhea.

We pulled all articles using a PubMed search term that combined non-specific and etiology-specific diarrhea on May 24, 2016 (Search string: ((((((diarrhoea[title] OR diarrhoea[MeSH Terms] OR diarrhea[title] OR diarrhea[MeSH Terms]) NOT ((colitis[title/abstract] OR enterocolitis[title/abstract] OR inflammatory bowel[title/abstract] OR irritable[title/abstract] OR Crohn\*[title/abstract] OR HIV[title] OR treatment[title] OR therapy[title])) NOT ((appendicitis[title/abstract] OR esophag\*[title/abstract] OR surger\*[title/abstract] OR gastritis[title/abstract] OR liver[title/abstract] OR case report[title] OR case-report[title] OR therapy[title] OR treatment[title])) AND ( ( 2015/04/01:2016/12/31[PDat] ) AND Humans[Mesh] ) ))) OR (( (diarrhoea[title] OR diarrhoea[MeSH Terms] OR diarrhea[title] OR diarrhea[MeSH Terms]) AND (salmonella[title/abstract] OR salmonella[MeSH Terms] aeromonas[title/abstract] OR aeromonas[MeSH Terms] OR shigell\*[title/abstract] OR shigell\*[MeSH Terms] OR enteropathogenic e coli [title/abstract] OR enteropathogenic e coli[MeSH Terms] OR enterotoxigenic e coli[title/abstract] OR enterotoxigenic e coli[MeSH Terms] OR campylobacter[title/abstract] OR campylobacter[MeSH Terms] OR amoebiasis[title/abstract] OR entamoeb\*[title/abstract] OR amoebiasis[MeSH Terms] OR entamoeb\*[MeSH Terms] OR cryptosporidi\*[title/abstract] OR cryptosporidi\*[MeSH Terms] OR rotavirus[title/abstract] OR rotavirus[MeSH Terms] OR norovirus[title/abstract] OR norovirus[MeSH Terms] OR adenovirus[title/abstract] OR adenovirus[MeSH Terms]) AND ((etiolog\*[title/abstract] OR etiology[MeSH

Terms] OR cause[title/abstract] OR pathogen[title/abstract])) NOT ((colitis[title/abstract] OR enterocolitis[title/abstract] OR inflammatory bowel[title/abstract] OR irritable[title/abstract] OR Crohn\*[title/abstract] OR HIV[title] OR treatment[title] OR therapy[title])) NOT ((appendicitis[title/abstract] OR esophag\*[title/abstract] OR surger\*[title/abstract] OR gastritis[title/abstract] OR liver[title/abstract] OR case report[title] OR case-report[title] OR therapy[title] OR treatment[title])) AND ( ( 2015/04/01:2016/12/31[PDat] ) AND Humans[Mesh])))).

We identified 442 studies, of which 36 met our inclusion criteria. We extracted data points for location, sex, year, and age. For the data that describe proportion of episodes positive for a given pathogen, we assigned an age range based on the prevalence-weighted mean age of diarrhea in the appropriate year/sex/location if the age of the study participants was not reported.

We used the Global Enteric Multicenter Study (GEMS), a seven-site, case-control study of moderate-to-severe diarrhea in children under 5 years,<sup>2</sup> to calculate odds ratios for the diarrheal pathogens. We analyzed raw data for a systematic reanalysis, representative of the distribution of cases and controls by age and site, of roughly half of the 22,000 original GEMS samples that were tested for the presence of pathogen using quantitative polymerase chain reaction (qPCR).<sup>3</sup>

### ***Severity split inputs***

Diarrheal diseases have three severity levels: mild, moderate, and severe. The proportion of diarrhea cases that are assigned to each comes from a systematic review of diarrhea severity.<sup>1</sup> Mild cases are the proportion of diarrhea cases that did not seek medical care (64.8%); moderate cases are the proportion that sought medical care but did not have severe dehydration or bloody stool (28.9%); and severe cases are the proportion that sought medical care with severe dehydration or bloody stool (6.9%). These proportions are based on the frequency of dehydration and bloody stool among community-based studies reported in the systematic review.

### **Modeling strategy**

The non-fatal diarrheal disease burden is modeled in DisMod-MR, a Bayesian meta-regression modeling framework. DisMod-MR produces estimates of the incidence, prevalence, and remission of diarrhea for each age, sex, location, and year. We defined remission, or the time to recovery, as five days average. Diarrhoeal disease episodes are characterized as three or more loose stools in a 24 hour period. The reference category for our input data is community based diarrhoea episodes such as data from population-representative surveys or community cohorts. Input data that are from a different population, such as hospital outpatient or inpatient groups, are adjusted by study-level covariates so that they are consistent with the reference category. This step occurs in DisMod.

Country-level covariates also inform the model. These include the proportion of the population that have access to improved sanitation, access to improved water sources, health system access, income per capita, and the SEV for diarrhea (**Table 3**).

We estimated diarrheal disease etiologies separately from overall diarrhea mortality using a counterfactual strategy for enteric adenovirus, *Aeromonas*, *Entamoeba histolytica* (amoebiasis), *Campylobacter enteritis*, *Cryptosporidium*, typical enteropathogenic *Escherichia coli* (t-EPEC),

enterotoxigenic *Escherichia coli* (ETEC), norovirus, non-typhoidal salmonella infections, rotavirus, and *Shigella*. *Vibrio cholerae* and *Clostridium difficile* were modeled separately.

Diarrheal etiologies are attributed to diarrheal deaths using a counter-factual approach. We calculated a population attributable fraction (PAF) from the proportion of severe diarrhea cases that are positive for each etiology. The PAF represents the relative reduction in diarrhea mortality if there was no exposure to a given etiology. As diarrhea can be caused by multiple pathogens and the pathogens may co-infect, PAFs can overlap and add up to more than 100%. We calculated the PAF from the proportion of severe diarrhea cases that are positive for each etiology. We assumed that hospitalized diarrhea cases are a proxy of severe and fatal cases. We used the following formula to estimate PAF:<sup>4</sup>

$$PAF = Proportion * (1 - \frac{1}{OR})$$

Where *Proportion* is the proportion of diarrhea cases positive for an etiology and *OR* is the odds ratio of diarrhea given the presence of the pathogen.

We dichotomized the continuous qPCR test result using the value of the cycle threshold (Ct) that most accurately discriminated between cases and controls. The Ct values range from 0 to 35 cycles representing the relative concentration of the target gene in the stool sample. A low value indicates a higher concentration of the pathogen while a value of 35 indicates the absence of the target in the sample. We used the lower Ct value when we had multiple Ct values for the cutpoint. The case definition for each pathogen is a Ct value that is below the established cutoff point.

We used a mixed effects conditional logistic regression model to calculate the odds ratio for under 1 year and 1-4 years old for each of our pathogens. The odds ratio for 1-4 years was applied to all GBD age groups over 5 years. There were three pathogen-age odds ratios that were not statistically significant: *Aeromonas* and *Amoebiasis* in under 1 year and *Campylobacter* in 1-4 years. The mean value of the odds ratio was above 1 in all three cases so we transformed the odds ratios for these three exceptions only in log-space such that exponentiated values could not be below 1. The transformation was:

$$Odds\ ratio = exp(log(or) - 1) + 1$$

We modeled the proportion data using the meta-regression tool DisMod-MR to estimate the proportion of positive diarrhea cases for each separate etiology by location/year/age/sex and to adjust for the covariates.

We used the estimated sensitivity and specificity of the laboratory diagnostic technique used in the GEMS study compared to the qPCR case definition to adjust our proportion before we computed the PAF:<sup>5</sup>

$$Proportion_{True} = \frac{(Proportion_{Observed} + Specificity - 1)}{(Sensitivity + Specificity - 1)}$$

We used this correction to account for the fact that the proportions we used are based on a new test that is not consistent with the laboratory-based case definition (qPCR versus GEMS conventional laboratory testing for pathogens).<sup>15</sup>

Our literature review extracted the proportion of any enteropathogenic *Escherichia coli* (EPEC) without differentiating between typical (tEPEC) and atypical (aEPEC). In order to be consistent with the odds ratios



that we obtained, we adjusted our proportion estimates of any EPEC to typical EPEC only. This adjustment was informed by a subset of our literature review that reported both atypical and typical EPEC. We estimated a ratio by super-region of tEPEC to any EPEC and adjusted our proportion estimates accordingly. We found that the majority of EPEC diarrhea cases were positive for atypical EPEC, consistent with other published work.<sup>3</sup>

For *Vibrio cholerae* (cholera), we used the literature review to estimate expected number of cholera cases for each country-year using the incidence of diarrhoea, estimated using DisMod-MR, and the proportion of diarrhoea cases that are positive for cholera. We assigned cholera PAF using odds ratios from the qPCR results to estimate a number of cholera-attributable cases. We compared this expected number of cholera cases to the number reported to the World Health Organization at the country-year level.<sup>6</sup> We modeled the underreporting fraction to correct the cholera case notification data for all countries using health system access and the diarrhoea SEV scalar to predict total cholera cases. We used the age-specific proportion of positive cholera samples in DisMod and our incidence estimates to predict the number of cholera cases for each age/sex/year/location. Finally, we modeled the case fatality ratio of cholera using DisMod-MR and to estimate the number of cholera deaths.

For *C. difficile*, we modeled incidence and mortality in DisMod-MR for each age, sex, year, location. DisMod-MR is a Bayesian meta-regression tool that uses spatio-temporal information as priors to estimate prevalence, incidence, remission, and mortality for *C. difficile* infection. DisMod-MR uses a compartmental model to relate prevalence, incidence, remission, and mortality. We set remission in our model to 1 month.

There are several key updates to the approach to diarrhea etiology estimation in GBD 2016 compared to GBD 2015. There are new data used in the diarrhea DisMod-MR models and in the diarrhea proportion DisMod-MR models. We changed the age groups used in the odds ratio estimation. In GBD 2015 and before, odds ratios were estimated for each age group defined by GEMS: 0-1 year, 1-2 years, and 2-5 years. For GBD 2016, we have collapsed the last two age groups so that our odds are representative for under-1 and over-1 years. We have updated the survey data extraction methodology so that we account for the seasonality of diarrhea in each GBD region. We have changed the duration of diarrhea from an average of 4.2 days used in GBD 2015 and prior and updated the duration so that there is variation in space and uncertainty in the duration estimate. Last, we have updated the proportion severity splits based on a literature review.

Table 1. Nonfatal input data used in diarrhea modeling.

| Type of data             | Data points (#) |
|--------------------------|-----------------|
| Facility - inpatient     | 14,913          |
| Facility - other/unknown | 6,540           |
| Survey - cross-sectional | 6,474           |
| Other                    | 2,231           |
| <b>Total</b>             | <b>30,158</b>   |

Figure 1. The number of data points used in diarrhea non-fatal modeling for each country is shown.

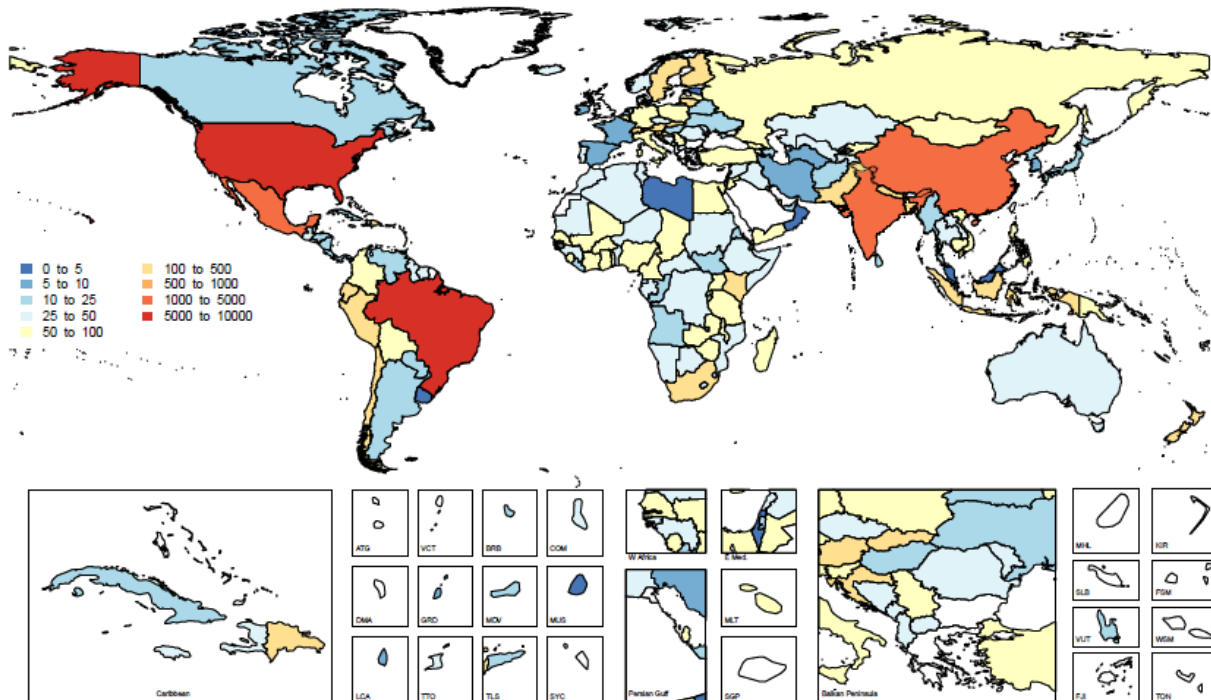

**Table 2. Duration of diarrhea.** Values are from a systematic review of diarrhea duration.<sup>1</sup>

|        | Mean     | Lower    | Upper    |
|--------|----------|----------|----------|
| Global | 4.3 days | 4.2 days | 4.4 days |

**Table 3. Severity splits,** details on the severity levels for diarrhea in GBD 2015 and the associated disability weight (DW) with that severity.

| Severity level | Lay description                                                                                                                                                   | DW (95% CI)         |
|----------------|-------------------------------------------------------------------------------------------------------------------------------------------------------------------|---------------------|
| Mild           | Has diarrhea defined as 3 or more loose stools in a 24-hour period with no dehydration                                                                            | 0.074 (0.049-0.104) |
| Moderate       | Has diarrhea defined as 3 or more loose stools in a 24-hour period with painful cramps and feeling thirsty and any dehydration                                    | 0.188 (0.125-0.264) |
| Severe         | Has diarrhea defined as 3 or more loose stools in a 24-hour period with painful cramps and is very thirsty or feels nauseated or tired and/or severely dehydrated | 0.247 (0.164-0.348) |

**Table 4. Covariates.** Summary of covariates used in the diarrhea DisMod-MR meta-regression model

| Covariate                           | Type          | Parameter        | Exponentiated beta (95% Uncertainty Interval) |
|-------------------------------------|---------------|------------------|-----------------------------------------------|
| Low income hospital                 | Study-level   |                  | 0.62 (0.24-1.08)                              |
| Inpatient population                | Study-level   |                  | 0.009 (0.005-0.02)                            |
| Marketscan data                     | Study-level   |                  | 0.044 (0.028-0.092)                           |
| Diarrhea SEV                        | Country-level | Prevalence       | 0.87 (0.84-0.91)                              |
| Unsafe sanitation SEV               | Country-level | Prevalence       | 2.36 (2.01-2.64)                              |
| Rotavirus vaccine coverage          | Country-level | Prevalence       | 0.76 (0.74-0.79)                              |
| Sex                                 | Country-level | Prevalence       | 0.95 (0.93-0.97)                              |
| Healthcare access and quality index | Country-level | Excess mortality | 0.93 (0.93-0.93)                              |
| Sex                                 | Country-level | Excess mortality | 1.21 (1.18-1.23)                              |

## References

- 1 Lamberti LM, Fischer Walker CL, Black RE. Systematic review of diarrhea duration and severity in children and adults in low- and middle-income countries. *BMC Public Health* 2012; **12**: 276.
- 2 Kotloff KL, Nataro JP, Blackwelder WC, *et al.* Burden and aetiology of diarrhoeal disease in infants and young children in developing countries (the Global Enteric Multicenter Study, GEMS): a prospective, case-control study. *Lancet Lond Engl* 2013; **382**: 209–22.
- 3 Liu J, Gratz J, Amour C, *et al.* A laboratory-developed TaqMan Array Card for simultaneous detection of 19 enteropathogens. *J Clin Microbiol* 2013; **51**: 472–80.
- 4 Miettinen OS. Proportion of disease caused or prevented by a given exposure, trait or intervention. *Am J Epidemiol* 1974; **99**: 325–32.
- 5 Reiczigel J, Földi J, Ozsvári L. Exact confidence limits for prevalence of a disease with an imperfect diagnostic test. *Epidemiol Infect* 2010; **138**: 1674–8.
- 6 Platts-Mills JA, Operario DJ, Houpt ER. Molecular diagnosis of diarrhea: current status and future potential. *Curr Infect Dis Rep* 2012; **14**: 41–6.
- 7 Ochoa TJ, Barletta F, Contreras C, Mercado E. New insights into the epidemiology of enteropathogenic *Escherichia coli* infection. *Trans R Soc Trop Med Hyg* 2008; **102**: 852–6.
- 8 World Health Organization. Global Health Observatory data repository: Cholera. 2016. <http://apps.who.int/gho/data/node.main.174?lang=en> (accessed Aug 25, 2016).
- 9 Global Health Observatory data repository: Cholera. World Health Organ. <http://apps.who.int/gho/data/node.main.174?lang=en> (accessed April 20, 2016).

# Typhoid and Paratyphoid Fever

## Flowchart

Typhoid and paratyphoid fever

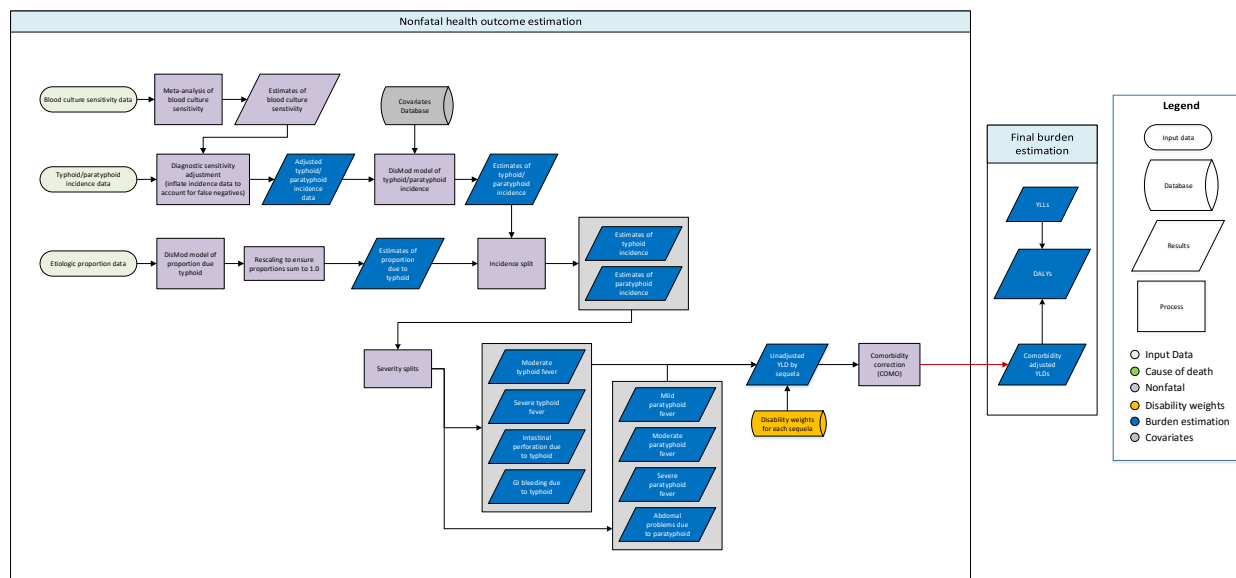

## Case definition

Typhoid and paratyphoid are acute bacterial infections that most commonly cause febrile illness and gastrointestinal symptoms. Severe cases are associated with intestinal bleeding and perforation, altered mental state and, in some cases, death. We define a confirmed case as one for which there has been a positive blood culture test for either *Salmonella enterica typhi* or *paratyphi*. Diagnostic criteria do not typically accompany national surveillance reports; however, with blood culture being the standard diagnostic, we treat reported cases as confirmed. Given the poor sensitivity of blood culture, however, we estimated case definition as simply febrile illness resulting from an infection with *Salmonella enterica typhi* or *paratyphi*. This is effectively a counterfactual definition in which we attempt to estimate the number of true infections regardless of test result. These causes include all ICD-10 codes under the heading A01 (Typhoid and paratyphoid fevers).

## Input data

### Model inputs

Our incidence dataset included a combination of data from prospective cohort studies and national surveillance systems. Similarly, data on proportions due to typhoid and paratyphoid included a combination of prospective cohort studies and national surveillance systems.

| Level       | Incidence | Proportion |
|-------------|-----------|------------|
| Data points | 864       | 414        |

|           |    |    |
|-----------|----|----|
| Studies   | 89 | 56 |
| Locations | 59 | 54 |
| Regions   | 14 | 11 |

### Severity splits

For GBD 2016, we derived severity splits based on a published review of enteric fever outcomes from (Azmatullah A, Qamar FN, Thaver D, et al. 2005).

Paratyphoid is split into four sequelae: mild (28.5% [15.6–44.2]), moderate (52.25% [27.2–77.7]), severe (14.25% [8.2–21.8]), and abdominal pain and distention (5.0% [2.8–7.6]):

| Sequela                                        | Description                                                                                          | Disability weight      |
|------------------------------------------------|------------------------------------------------------------------------------------------------------|------------------------|
| Mild                                           | Has a low fever and mild discomfort , but no difficulty with daily activities.                       | 0.006<br>(0.002–0.012) |
| Moderate                                       | Has a fever and aches, and feels weak, which causes some difficulty with daily activities.           | 0.051<br>(0.032–0.074) |
| Severe                                         | Has a high fever and pain, and feels very weak, which causes great difficulty with daily activities. | 0.133<br>(0.088–0.19)  |
| Abdominal pain & distention due to paratyphoid | Has pain in the belly and feels nauseated. The person has difficulties with daily activities.        | 0.114<br>(0.078–0.159) |

Similarly, typhoid is split into four sequelae: moderate (35.0% [26.0–44.3]), severe (47.75% [38.0–57.4]), severe abdominal pain and distention (17.0% [10.0–25.7]), and intestinal bleeding (0.25% [0–2.0]):

| Sequela                                                         | Description                                                                                                       | Disability weight      |
|-----------------------------------------------------------------|-------------------------------------------------------------------------------------------------------------------|------------------------|
| Moderate                                                        | Has a fever and aches, and feels weak, which causes some difficulty with daily activities.                        | 0.051<br>(0.032–0.074) |
| Severe                                                          | Has a high fever and pain, and feels very weak, which causes great difficulty with daily activities.              | 0.133<br>(0.088–0.19)  |
| Gastrointestinal bleeding                                       | Vomits blood and feels nauseated.                                                                                 | 0.325<br>(0.209–0.462) |
| Abdominal pain and distention (includes intestinal perforation) | Has severe pain in the belly and feels nauseated. The person is anxious and unable to carry out daily activities. | 0.324<br>(0.22–0.442)  |

## Modelling strategy

We first model total incidence of typhoid and paratyphoid combined. Second, we model the proportion of this total due to typhoid and the proportion due to paratyphoid. Finally, we split the case estimates into sequelae representing different major symptoms and levels of severity.

Total incidence was modelled using DisMod-MR, using the proportion of the population with access to clean water, and the proportion of the population living in the Indian Ocean monsoon belt as covariates. We performed a crosswalk using a study-level covariate indicating sources that were based on passive versus active surveillance, with active surveillance as the reference. This adjusts for incomplete case capture by passive surveillance. Incidence data were inflated to account for poor diagnostic sensitivity, based on an internal meta-analysis of the sensitivity of blood culture, the most common diagnostic used for typhoid. Similarly, we used two DisMod models to estimate etiologic proportions: one for the proportion of total incidence due to typhoid, and one for the proportion due to paratyphoid.

Typhoid cases are split between four sequelae: moderate typhoid fever, severe typhoid fever, severe typhoid fever with intestinal bleeding, and typhoid fever with abdominal complications. Paratyphoid cases are split between four sequelae: mild paratyphoid fever, moderate paratyphoid fever, severe paratyphoid fever, and paratyphoid fever with abdominal complications.

## Changes from GBD 2015 to GBD 2016

We made no major changes in our methods between GBD 2015 and 2016.

## Other intestinal infectious diseases

In addition to the intestinal infectious diseases described above, there are many diverse types of intestinal infectious diseases. Because these intestinal infectious diseases are diverse in their underlying causes and risk factors as well as in their associated health outcomes, modelling them together in a DisMod-MR model would not produce reliable estimates of prevalence or excess mortality. Instead, we calculated the YLDs caused by intestinal infectious diseases directly using a YLD/YLL ratio.

We calculated the ratio of YLDs to YLLs across the specified intestinal infectious diseases for which nonfatal outcomes were modelled, using YLL estimates from the GBD 2016 cause of death (CoD) analysis. We then multiplied this YLD/YLL ratio by the YLL estimates for other intestinal infectious diseases from the GBD 2016 CoD analysis, providing us with an estimate of the YLDs associated with other intestinal infectious diseases.



# Lower respiratory infections (LRI)

## Flowchart

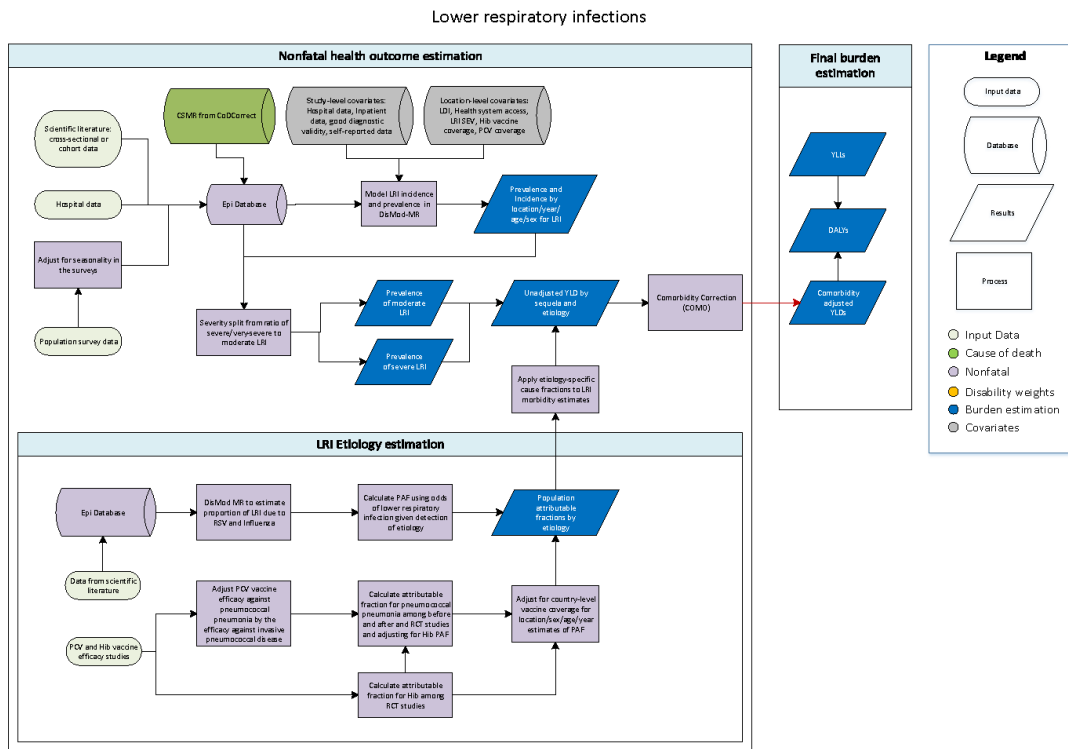

## Case definition

We used clinician-diagnosed pneumonia or bronchiolitis as our case definition for lower respiratory infections (LRI). We included ICD9 codes 073.0-073.6, 079.82, 466-469, 480-489, 513.0, and 770.0 and ICD10 codes A48.1, J09-J22, J85.1, P23-P23.9, and U04. LRI etiologies are modeled separately from overall LRI incidence and prevalence. The etiologies include influenza, respiratory syncytial virus, *Streptococcus pneumoniae*, and *Haemophilus influenzae* type b and are episodes of LRI where the etiology is the causal pathogen in the infection.

## Input data

### Model inputs

Input data included all data used in GBD 2015. We used two primary types of input data for lower respiratory infections. The first is lower respiratory infection incidence and prevalence data. These data come from a systematic literature review, hospital inpatient and outpatient data, claims data from the US, and population-representative surveys (**Table 1**). The second type of data is on the etiologies of LRI. Influenza and respiratory syncytial virus (RSV) population attributable fractions were informed by a systematic literature review of the proportion of LRI cases that are positive for each pathogen.

*Haemophilus influenzae* type B (Hib) and *Streptococcus pneumoniae* (pneumococcal pneumonia) are informed by a systematic review of vaccine efficacy and effectiveness studies.

To estimate the non-fatal burden of lower respiratory infections (LRI), we conducted a systematic review of scientific literature for LRI incidence and prevalence (Search String: ('lower respiratory' [title/abstract] OR pneumonia[title/abstract] AND ('2015/05/01'[PDat] : '2016/6/31'[PDat] )AND Humans[MeSH Terms] NOT(autoimmune[title/abstract] OR COPD [title/abstract] OR 'cystic fibrosis'[title/abstract])). Our inclusion criteria were studies that were published between May 2015 and June 2016, had a sample size of at least 100, were at least one year in duration, and included lower respiratory infections, pneumonia, or bronchiolitis in the case definition. Our literature review identified 631 articles, of which 48 were included and extracted. We also included studies referred by experts and identified through scientific literature references.

We also used self-reported prevalence of LRI symptoms from population-representative surveys, such as the Demographic and Health Survey and the Multiple Indicator Cluster Survey. When possible, we extracted survey data by 1-year age group and by sex. We converted these data from two-week period prevalence to point prevalence. The equation for this adjustment is

$$1) \textit{ Point Prevalence} = \frac{\textit{Period Prevalence} * \textit{Duration}}{(\textit{Recall Period} + \textit{Duration} - 1)}$$

We performed a systematic review of the duration of symptoms of LRI. We sought consistency with our case definition of LRI and defined our duration as the time between the onset of symptoms to the resolution of increased work of breathing. Although crucial, there were very limited data on spatial, temporal, or age-specific duration which may vary based on severity, etiology, and treatment. We identified 485 titles from PubMed and extracted 6 studies which were used in a meta-analysis (mean duration 7.79 days, 6.2-9.64 days).

Survey data were adjusted for seasonality. An inclusion criterion for scientific literature is a study duration longer than 1 year to avoid bias in the seasonal timing of LRI. Surveys are frequently conducted over several months. To account for seasonal variation in LRI symptom prevalence, we fit a simple sine/cosine model for each GBD region. The model is mixed-effects with random effects on each site. The model accounts for the year of the survey and the case definition used. The percent difference between the monthly model fit diarrhea prevalence and the mean fitted diarrheal prevalence is a scalar to adjust survey data by month and location.

In addition to survey data, hospital inpatient, outpatient data, and US claims data were included in the LRI modeling. To make the data more consistent in the modeling process, we converted all incidence data to prevalence.

We updated our systematic review of scientific literature for the proportion of LRI that tested positive for influenza and respiratory syncytial virus (RSV) to include all data from GBD 2015 and from studies published between May 2015 and May 2016. Inclusion criteria were studies that had a sample size of at least 100, studies that were at least one year in duration, and studies describing lower respiratory infections, pneumonia, or bronchiolitis as the case definition. During our literature review we identified 209 studies, of which 7 met our inclusion criteria and were extracted. We excluded studies that described pandemic H1N1 influenza solely and studies that used influenza-like illness as the case definition. We

assigned an age range based on the prevalence-weighted mean age of LRI in the appropriate year/sex/location if the ages of the study participants were not reported.

We also conducted a systematic literature review of studies on the Hib vaccine and PCV effectiveness studies against X-ray-confirmed pneumonia and against pneumococcal and Hib disease until May 2016. For PCV studies, we extracted, if available, the distribution of pneumococcal pneumonia serotypes and the serotypes included in the PCV used in the study. No new studies were identified for GBD 2016. We excluded observational and case-control studies due to implausibly high vaccine efficacy estimates. Hib trial data were exclusively from children <5 years so we did not include the effect of Hib on ages over 5 years of age. PCV trial data are also frequently limited to younger age populations. To understand the contribution of pneumococcal pneumonia in older populations, we also included PCV efficacy studies that used before-after approaches.

**Table 1: Data Inputs**

| <b>Type of data</b>      | <b>Data points (#)</b> |
|--------------------------|------------------------|
| Facility - inpatient     | 15,258                 |
| Facility - other/unknown | 6,411                  |
| Survey - cross-sectional | 7,772                  |
| Other                    | 909                    |
| <b>Total</b>             | <b>30,350</b>          |

Figure 1. The number of data points used in the LRI non-fatal modeling by country is shown.

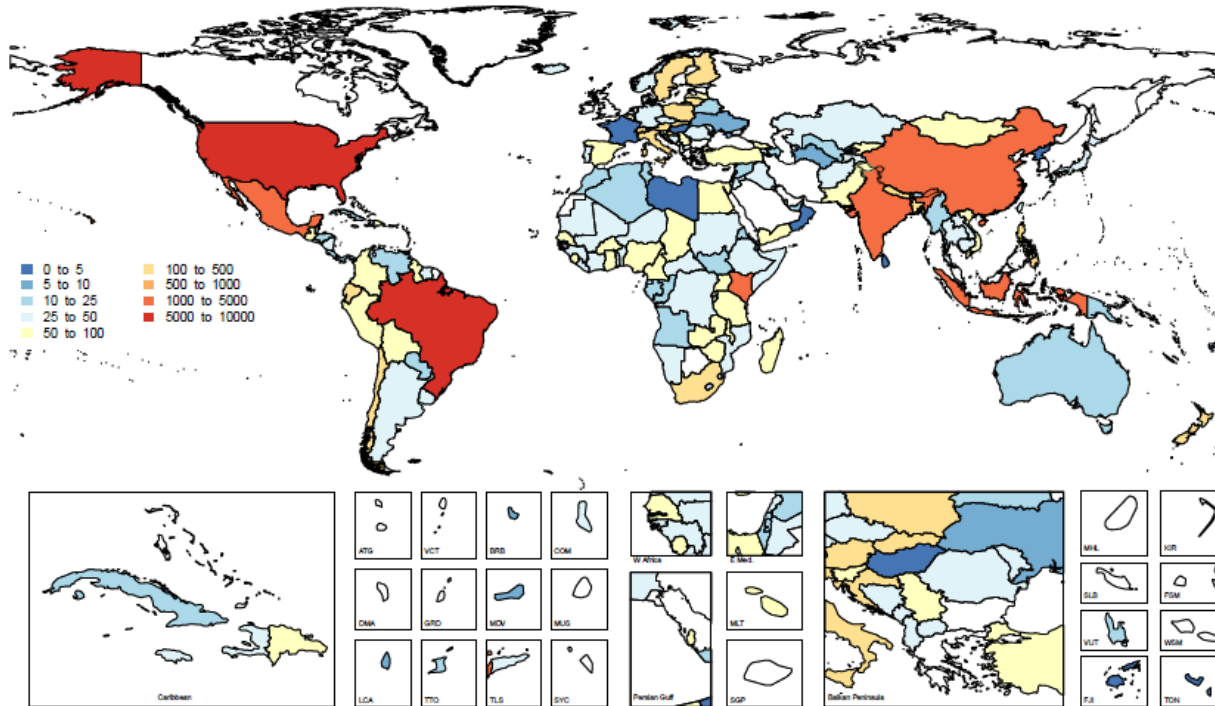

### Severity splits

The distribution of moderate (85%) and severe (15%) lower respiratory infections is determined by a meta-analysis of the ratio of severe to all LRI from studies that report the incidence of moderate and severe lower respiratory infections.

We used the health states of acute infectious disease episode, moderate and severe, with the lay descriptions and disability weight values shown in table below:

Table 2: Severity Splits

| Severity level | Lay description                                                                                     | DW (95% CI)         |
|----------------|-----------------------------------------------------------------------------------------------------|---------------------|
| Moderate       | Has a fever and aches and feels weak which causes some difficulty with daily activities.            | 0.051 (0.032-0.074) |
| Severe         | Has a high fever and pain and feels very weak, which causes great difficulty with daily activities. | 0.133 (0.088-0.19)  |

### Modeling strategy

The non-fatal lower respiratory infection burden is modeled in DisMod-MR, a Bayesian meta-regression modeling framework. DisMod-MR produces estimates of the incidence, prevalence, and remission of LRI for each age, sex, location, and year. We defined the time to recovery as an average of 10

days (9-12 days) which corresponds with a remission 36.5. The models are informed by study-level covariates and by country-level covariates.

Input data are adjusted to our standard case definition. Data are adjusted by study-level binary covariates which describe if the source is a hospital or inpatient sample and if the data come from a self-reported survey (**Table 3**). Self-reported prevalence of LRI symptoms from population-representative surveys such as the Demographic and Health Survey (DHS) and the Multiple Indicator Cluster Survey (MICS) is used. Our case definition from symptom-based prevalence estimates is children in the last 2-weeks with fever and cough with difficulty breathing and symptoms located in the chest and/or chest and nose. This is consistent with the WHO Integrated Management of Childhood Illness guidelines definition of pneumonia and with the DHS and MICS definition of acute respiratory infection (ARI).<sup>1</sup> We extracted the prevalence of children under 5 years old that had fever and cough with difficulty breathing and included an indicator for this less-specific definition. Some surveys did not include the prevalence of LRI symptoms and fever so we adjusted survey prevalence estimates that did not include fever by studies that did based on a logistic regression.

**Table 3: Model covariates**

| Study covariate                                  | Type          | Parameter        | Exponentiated beta |
|--------------------------------------------------|---------------|------------------|--------------------|
| Hospital inpatient population                    | Study-level   | -                | 0.25 (0.23-0.27)   |
| Hospital data from middle- or low-income country | Study-level   | -                | 0.17 (0.16-0.19)   |
| Self-reported                                    | Study-level   | -                | 4.05 (3.81-4.27)   |
| Poor diagnostic validity                         | Study-level   | -                | 1.72 (1.63-1.81)   |
| Marketscan                                       | Study-level   | -                | 1.95 (1.77-2.12)   |
| Hib vaccine coverage                             | Country-level | Prevalence       | 0.73 (0.70-0.76)   |
| LRI SEV                                          | Country-level | Prevalence       | 0.98 (0.91-1.07)   |
| Socio-demographic index                          | Country-level | Prevalence       | 0.77 (0.59-1.06)   |
| Healthcare access and quality index              | Country-level | Excess mortality | 0.96 (0.96-0.96)   |

### ***Etiologies***

We estimated LRI etiologies separately from overall LRI mortality using two distinct counterfactual modeling strategies to estimate population attributable fractions (PAFs), described in detail below. The PAF represents the relative reduction in LRI mortality if there was no exposure to a given etiology. As LRIs can be caused by multiple pathogens and the pathogens may co-infect, PAFs can overlap and add up to more than 100%. Separate strategies were used for viral- influenza and respiratory syncytial virus (RSV)- and bacterial- *Streptococcus pneumoniae* and *Haemophilus influenzae* type B- etiologies. We did not attribute etiologies to neonatal pneumonia deaths due to a dearth of reliable data in this age group. We calculated uncertainty of our PAF estimates from 1,000 draws of each parameter using normal distributions in log space.

Influenza and RSV. We calculated the population attributable fraction (PAF) from the proportion of severe LRI cases positive for influenza and RSV. We assumed that hospitalized LRI cases are a proxy of severe cases. We used the following formula to estimate PAF:<sup>2</sup>

$$\text{PAF} = \text{Proportion} * (1-1/\text{OR})$$

Where Proportion is the proportion of LRI cases that test positive for influenza or RSV and OR is the odds ratio of LRI given the presence of the pathogen. We used an odds ratio of 5.1 (3.19 – 8.14) for influenza and 9.79 (4.98 – 19.27) for RSV from a recently published meta-analysis.<sup>3</sup> These odds ratios are marginally different from those used in GBD 2013.

We modeled the proportion data using the meta-regression tool DisMod-MR to estimate the proportion of LRI cases that are positive for influenza and RSV, separately, by location/year/age/sex. We accounted for study-level covariates in our models such as PCR as the diagnostic technique, studies that investigated RSV or influenza exclusively, and studies from inpatient populations.

As the case-fatality of viral causes of pneumonia is lower than for bacterial causes, we adjusted for differential case-fatality by determining the etiological fractions for mortality attributable to RSV and influenza (Table 2). We measured the etiologic fractions by applying a relative case-fatality adjustment based on in-hospital case-fatality, which we coded to specific pneumonia etiologies. Hospital admissions data of this type were limited to data from the USA, Austria, Brazil, and Mexico. We generated the pooled estimate of the case-fatality differential between bacterial (pneumococcus, Hib) and viral etiologies (RSV, influenza) using DisMod-MR.

Pneumococcal pneumonia and Hib. For *Streptococcus pneumoniae* (pneumococcal pneumonia) and *Haemophilus influenzae* type B (Hib), we calculated the population attributable fraction using a vaccine probe design.<sup>4,5</sup> The ratio of vaccine effectiveness against nonspecific pneumonia to pathogen-specific disease represents the fraction of pneumonia cases attributable to each pathogen.

To estimate the PAF for Hib and pneumococcal pneumonia, we calculated the ratio of vaccine effectiveness against nonspecific pneumonia to pathogen-specific pneumonia (Equations 1 and 3). We estimated a study-level estimate of PAF from a meta-analysis of these ratios. To estimate the PAF for Hib, we only used randomized controlled trials because of implausibly high values of vaccine efficacy in case-control studies. To estimate the PAF for pneumococcal pneumonia, we included RCTs and before and after vaccine introduction longitudinal studies.

We adjusted the study-level PAF estimate by vaccine coverage and expected vaccine performance to estimate country- and year-specific PAF values. For pneumococcal pneumonia, we adjusted the PAF by the final Hib PAF estimate and by vaccine serotype coverage. Finally, we used an age distribution of PAF modeled in DisMod to determine the PAF by age. Because of an absence of data describing vaccine efficacy against Hib in children older than two years, we did not attribute Hib to episodes of LRI in ages five years and older.

We used a vaccine probe design to estimate the PAF for pneumococcal pneumonia and (Hib) by first calculating the ratio of vaccine effectiveness against nonspecific pneumonia to pathogen-specific pneumonia at the study level (Equations 1 and 2).<sup>4-6</sup> We then adjusted this estimate by vaccine coverage and expected vaccine performance to estimate country- and year-specific PAF values (Equations 3 and 4).

$$1) HibPAF_{Base} = 1 - \frac{VE_{Pneumonia}}{VE_{Hib}}$$

$$2) PneumoPAF_{Base} = 1 - \frac{VE_{Pneumonia} * (1 - PAF_{Hib} * VE_{Hib Optimal})}{VE_{Streptococcus} * Cov_{Serotype}}$$

$$3) PAF_{Hib} = PAF_{Base} * \frac{(1 - Cov_{Hib} * VE_{Hib Optimal})}{(1 - PAF_{Base} * Cov_{Hib} * VE_{Hib Optimal})}$$

$$4) PAF_{Pneumo} = \frac{PAF_{Base} * (1 - Cov_{PCV} * VE_{PCV Optimal})}{(1 - PAF_{Hib} * Cov_{Hib} * VE_{Hib Optimal}) * \left(1 - \frac{PAF_{Base} * Cov_{PCV} * VE_{PCV Optimal}}{(1 - PAF_{Hib} * Cov_{Hib} * VE_{Hib Optimal})}\right)}$$

Where  $VE_{Pneumonia}$  is the vaccine efficacy against nonspecific pneumonia,  $VE_{Hib}$  is the vaccine efficacy against invasive Hib disease,  $VE_{Streptococcus}$  is the vaccine efficacy against serotype-specific pneumococcal pneumonia,  $Cov_{serotype}$  is the serotype-specific vaccine coverage for PCV,<sup>7</sup>  $VE_{Hib Optimal}$  is the Hib effectiveness in the community (0.8)<sup>8</sup>,  $PAF_{Hib}$  is the final PAF for Hib,  $Cov_{PCV}$  is the PCV coverage,  $Cov_{Hib}$  is the Hib coverage by country, and  $VE_{PCV Optimal}$  is the vaccine effectiveness in the community (0.8).<sup>9</sup>

For Hib, we assumed that the vaccine efficacy against invasive Hib disease is the same against Hib pneumonia. For pneumococcal pneumonia, a recent study in adults<sup>10</sup> found that the vaccine efficacy against invasive pneumococcal disease may be significantly higher than against pneumococcal pneumonia. We used this ratio to adjust estimates of vaccine efficacy against invasive pneumococcal disease from other studies. However, recognizing that the study is unique in that it uses a urine antigen test among adults, we added uncertainty around our adjustment using a wide uniform distribution (median 0.65, 0.3-1.0).

There are several important differences in the approach to LRI etiology estimation in GBD 2016 compared to GBD 2015. We have added an adjustment for the seasonality of LRI symptom prevalence from population-representative surveys. We have performed an update to the average duration of LRI symptoms which decreased the mean duration of illness from 10 to 7.79 days. We have changed some of the covariates used in the modeling process and updated the input data for the LRI envelope and for its etiologies.

## References

1 World Health Organization: Department of Child and Adolescent Health and Development. Handbook Integrated Management of Childhood Illness. 2005.

2 Miettinen OS. Proportion of disease caused or prevented by a given exposure, trait or intervention. *Am J Epidemiol* 1974; **99**: 325–32.

- 3 Shi T, McLean K, Campbell H, Nair H. Aetiological role of common respiratory viruses in acute lower respiratory infections in children under five years: A systematic review and meta-analysis. *J Glob Health* 2015; **5**: 10408.
- 4 Feikin DR, Scott JAG, Gessner BD. Use of vaccines as probes to define disease burden. *Lancet Lond Engl* 2014; **383**: 1762–70.
- 5 O’Brien KL, Wolfson LJ, Watt JP, *et al.* Burden of disease caused by *Streptococcus pneumoniae* in children younger than 5 years: global estimates. *Lancet Lond Engl* 2009; **374**: 893–902.
- 6 Watt JP, Wolfson LJ, O’Brien KL, *et al.* Burden of disease caused by *Haemophilus influenzae* type b in children younger than 5 years: global estimates. *Lancet Lond Engl* 2009; **374**: 903–11.
- 7 Johnson HL, Deloria-Knoll M, Levine OS, *et al.* Systematic evaluation of serotypes causing invasive pneumococcal disease among children under five: the pneumococcal global serotype project. *PLoS Med* 2010; **7**. DOI:10.1371/journal.pmed.1000348.
- 8 Swingler G, Fransman D, Hussey G. Conjugate vaccines for preventing *Haemophilus influenzae* type B infections. *Cochrane Database Syst Rev* 2007; : CD001729.
- 9 Lucero MG, Dulalia VE, Nillos LT, *et al.* Pneumococcal conjugate vaccines for preventing vaccine-type invasive pneumococcal disease and X-ray defined pneumonia in children less than two years of age. *Cochrane Database Syst Rev* 2009; : CD004977.
- 10 Bonten MJM, Huijts SM, Bolkenbaas M, *et al.* Polysaccharide conjugate vaccine against pneumococcal pneumonia in adults. *N Engl J Med* 2015; **372**: 1114–25.



# Upper respiratory infections

## Flowchart

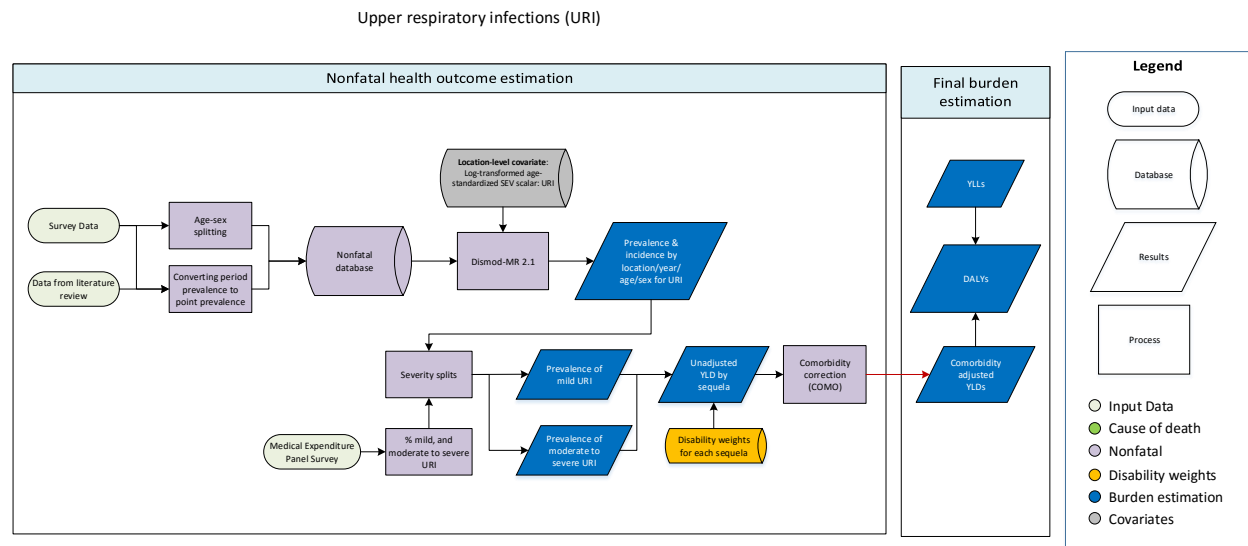

## Case Definition

Upper respiratory infections (URI) include acute nasopharyngitis, sinusitis, pharyngitis, tonsillitis, laryngitis/tracheitis and epiglottitis. For URI, ICD 10 codes are J00-J02,J02.8-J03,J03.8-J06.9,J36,J36.0, and ICD 9 codes are 460-465.9,475-475.9,476.9.

## Input data

### Model Inputs

For GBD 2013, a systematic review of the prevalence of URI was conducted. The PubMed search terms were: ((upper respiratory infection[Title/Abstract] or rhinitis[Title/Abstract] or rhinosinusitis[Title/Abstract] or sinusitis[Title/Abstract] or nasopharyngitis[Title/Abstract] or rhinopharyngitis[Title/Abstract] or common cold[Title/Abstract] or pharyngitis[Title/Abstract] or tonsillitis[Title/Abstract] or epiglottitis[Title/Abstract] or supraglottitis[Title/Abstract] or laryngitis[Title/Abstract] or laryngotracheitis[Title/Abstract] or tracheitis[Title/Abstract]) AND (prevalence[Title/Abstract] OR incidence[Title/Abstract]) NOT (allergies or allergy or allergic rhinitis or asthma) AND (“2009”[Date – Publication] : “2013”[Date – Publication]))

The exclusion criteria were:

1. Studies that were not population-based, eg, hospital or clinic-based studies
2. Studies that did not provide primary data on epidemiological parameters, eg, a commentary piece
3. Studies with a sample size of less than 150
4. Reviews

Updates to systematic reviews are performed on an ongoing schedule across all GBD causes: an update for upper respiratory infections will be performed in the next one to two iterations. The table below shows the number of literature studies included in GBD 2016, as well as the number of countries or subnational units and GBD world regions represented.

|                        | Prevalence | Incidence | Mortality risk |
|------------------------|------------|-----------|----------------|
| Studies                | 11         | -         | -              |
| Countries/subnationals | 10         | -         | -              |
| GBD world regions      | 8          | -         | -              |

In addition, data from nationally representative surveys including United States National Health Interview Surveys, Demographic and Health Surveys, and Russia Longitudinal Monitoring Surveys were included.

#### *Severity Splits*

The table below shows the severity distributions based on the data from Medical Expenditure Panel Surveys where we categorized “acute nasopharyngitis or acute uri multi sites/nos” as mild URI and “acute sinusitis, acute pharyngitis, acute tonsillitis, and acute laryngitis/tracheitis and epiglottitis” as moderate URI.

| Age   | Mild URI (proportion) | Moderate URI (proportion) | Standard error |
|-------|-----------------------|---------------------------|----------------|
| 0-4   | 0.8475367             | 0.1524633                 | 0.0235054      |
| 5-9   | 0.7957522             | 0.2042478                 | 0.0214788      |
| 10-14 | 0.7510127             | 0.2489873                 | 0.0219692      |
| 15-19 | 0.7800903             | 0.2199097                 | 0.0254533      |
| 20-24 | 0.8277971             | 0.1722029                 | 0.0340625      |
| 25-29 | 0.866052              | 0.133948                  | 0.0372739      |
| 30-34 | 0.8716526             | 0.1283474                 | 0.0385933      |
| 35-39 | 0.8711911             | 0.1288089                 | 0.0404143      |
| 40-44 | 0.8723335             | 0.1276665                 | 0.0413539      |
| 45-49 | 0.8835218             | 0.1164782                 | 0.0450838      |
| 50-54 | 0.8862297             | 0.1137703                 | 0.0483388      |
| 55-59 | 0.8882668             | 0.1117332                 | 0.0532085      |
| 60-64 | 0.8837538             | 0.1162462                 | 0.0618551      |
| 65-69 | 0.8844019             | 0.1155981                 | 0.0741072      |
| 70-74 | 0.8912954             | 0.1087046                 | 0.0867568      |
| 75-79 | 0.8846442             | 0.1153558                 | 0.0937314      |
| 80-84 | 0.9130687             | 0.0869313                 | 0.104148       |

The lay descriptions and disability weights for severity levels derived from the GBD Disability Weights study are shown below.

| Severity level                               | Lay description                                                                            | DW (95% CI)         |
|----------------------------------------------|--------------------------------------------------------------------------------------------|---------------------|
| Mild upper respiratory infections            | has a low fever and mild discomfort , but no difficulty with daily activities.             | 0.006 (0.002–0.012) |
| Moderate/severe upper respiratory infections | has a fever and aches, and feels weak, which causes some difficulty with daily activities. | 0.051 (0.032–0.074) |

### Modelling Strategy

URI was modeled using a standard DisMod MR2.2 model. We used the log-transformed age-standardized SEV scalar for URI as a location-level covariate.

Betas and exponentiated values are shown in the table below:

| Covariate                                           | Parameter  | beta   | Exponentiated beta      |
|-----------------------------------------------------|------------|--------|-------------------------|
| Log-transformed age-standardized SEV scalar for URI | Prevalence | 4.69   | 108.32 (45.02 – 147.82) |
| Sex                                                 | Prevalence | -0.029 | 0.97 (0.95–0.99)        |

# Otitis media

## Flowchart

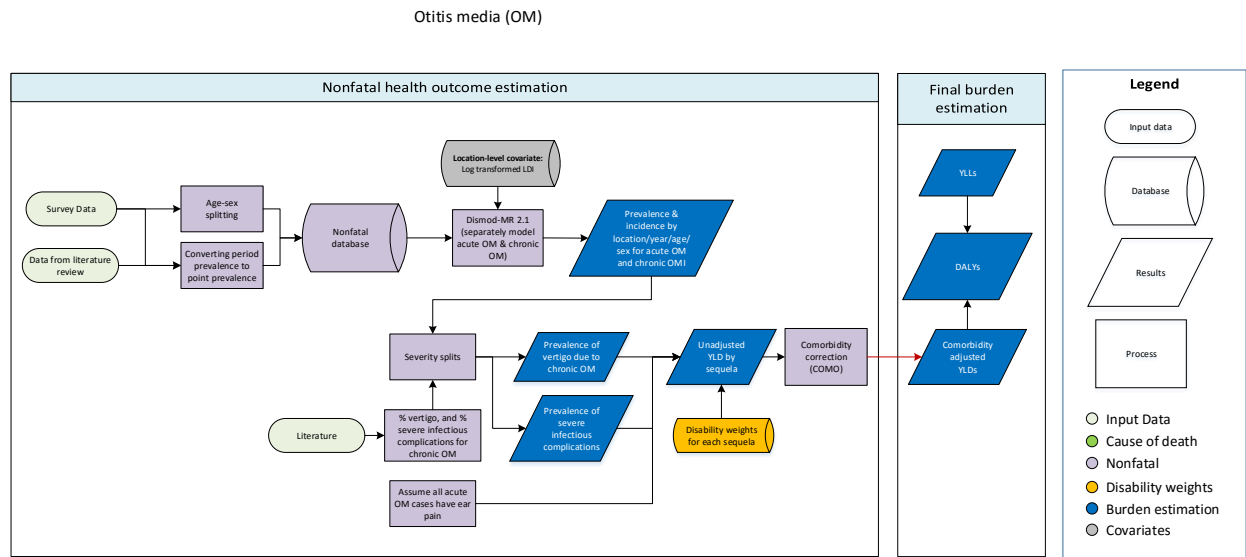

## Case Definition

Otitis media is an infection of the middle ear space. We included acute otitis media, chronic otitis media, and hearing loss due to otitis media in the GBD non-fatal outcome modelling. (The hearing loss estimation is included in the hearing loss report provided separately.) The ICD 10 codes are H65-H75.83, and ICD 9 codes are 381-384.9.

## Input data

### Model Inputs

A systematic review of the prevalence of otitis media was conducted for GBD 2013. The PubMed search terms were: (((otitis media[Title/Abstract] AND (incidence[Title/Abstract] OR prevalence[Title/Abstract])) AND ("2009"[Date – Publication] : "2013"[Date – Publication])).

The exclusion criteria were:

5. Studies that were not population-based, eg, hospital or clinic-based studies
6. Studies that did not provide primary data on epidemiological parameters, eg commentaries
7. Studies with a sample size of less than 150
8. Reviews
9. Case series

Updates to systematic reviews are performed on an ongoing schedule across all GBD causes, and an update for otitis media will be performed in the next one to two iterations. The table below shows the number of literature studies included in GBD 2016, as well as the number of countries or subnational units and GBD world regions represented.

|                        | Prevalence | Incidence | Remission |
|------------------------|------------|-----------|-----------|
| Studies                | 29         | 12        | 5         |
| Countries/subnationals | 20         | 8         | 4         |
| GBD world regions      | 11         | 5         | 4         |

In addition, data from the United States Medical Expenditure Panel Surveys and Australia National Health Surveys were included.

### *Severity Splits*

We assume that all acute otitis media cases would experience ear pain. The severity distributions for chronic otitis media based on the study by Lin and colleagues (2009) were as follows: (i) vertigo (2.9%, 95% CI: 2.4 to 3.6%), and (ii) severe infectious complications (0.05%, 95% CI: 0.01 to 0.2%). We considered the remaining 97% of chronic otitis media cases as asymptomatic. The lay descriptions and disability weights for severity levels derived from the GBD Disability Weights study are shown below.

| Severity level                                              | Lay description                                                  | DW (95% CI)            |
|-------------------------------------------------------------|------------------------------------------------------------------|------------------------|
| Ear pain                                                    | has an earache that causes some difficulty with daily activities | 0.013<br>(0.007–0.024) |
| Vertigo due to chronic otitis media*                        |                                                                  |                        |
| Severe infectious complications due to chronic otitis media | has an earache that causes some difficulty with daily activities | 0.013<br>(0.007–0.024) |

\* See the hearing loss report for the lay descriptions and disability weights for different severity levels.

### Modelling Strategy

We modelled acute and chronic otitis media as separate non-fatal health outcomes using DisMod-MR 2.2. We assumed that the incidence of acute otitis media decreases after the age of 5 years. Log-transformed LDI covariate was used as a location-level covariate to model chronic otitis media.

Betas and exponentiated values are shown in the table below:

Acute otitis media DisMod model

| Covariate | Parameter  | Beta (95% CI) | Exponentiated beta (95% CI) |
|-----------|------------|---------------|-----------------------------|
| Sex       | Prevalence | 0.17          | 1.18 (1.01 – 1.38)          |
| Sex       | Incidence  | -0.20         | 0.82 (0.76 – 0.88)          |

### Chronic otitis media DisMod model

| Covariate | Parameter  | Beta (95% CI) | Exponentiated beta (95% CI) |
|-----------|------------|---------------|-----------------------------|
| Log LDI   | Prevalence | -0.41         | 0.67 (0.61 – 0.76)          |
| Sex       | Prevalence | 0.046         | 1.05 (0.75 – 1.46)          |

### Reference

Lin, Y. S., Lin, L. C., Lee, F. P., & Lee, K. J. (2009). The prevalence of chronic otitis media and its complication rates in teenagers and adult patients. *Otolaryngology-Head and Neck Surgery*, 140(2), 165-170.

# Meningitis

## Flowchart

Meningitis

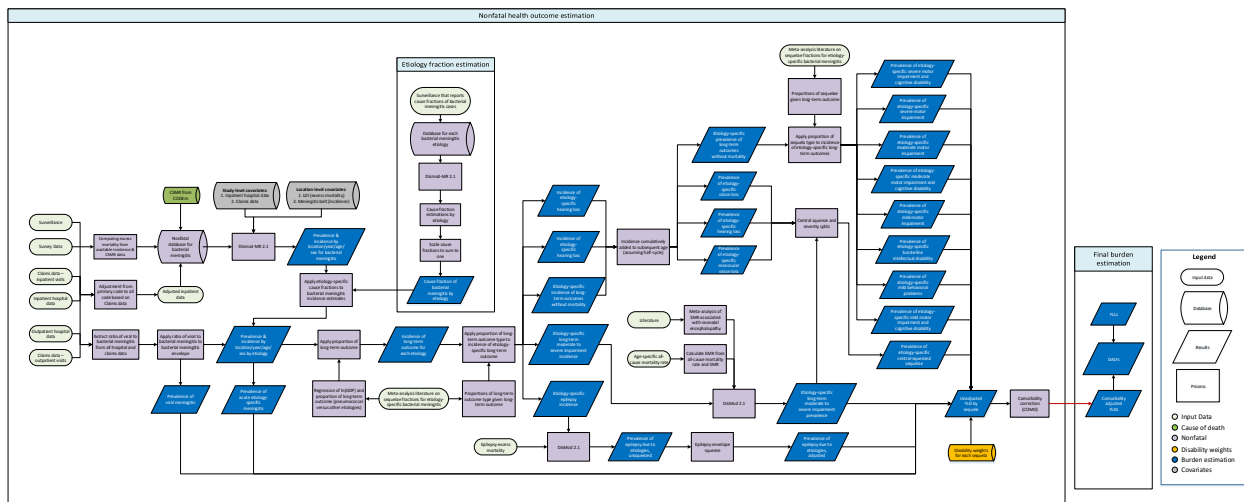

## Case definition

Meningitis is a disease caused by inflammation of the meninges, the protective membrane surrounding the brain and spinal cord, and is typically caused by an infection in the cerebrospinal fluid. Symptoms include headache, fever, stiff neck, and sometimes seizures. Included in the GBD modeling were cases meeting ICD-10 diagnostic criteria for meningitis due to bacteria, viruses, or other causes (A39-A39.9, A87-A87.9, D86.81, G00.0-G00.8, G03-G03.8, Z20.811, and Z22.31) (1). In GBD 2016, meningitis encompasses viral meningitis and four bacterial etiologies: pneumococcal, haemophilus influenza type B (HiB), meningococcal, and other.

## Input data

### Model inputs

In the GBD 2010 study, a systematic review of literature was conducted to capture studies of incidence and excess mortality rate for all bacterial meningitis cases. For each of the four etiologies, literature included excess mortality rate, incidence, proportion, remission, and standardized mortality ratio. The inclusion criteria stipulated that: (1) the publication year must be between 1980 and 2010; (2) “caseness” was based on diagnoses by antigen test, blood test, cerebrospinal fluid test, polymerase chain reaction test, or latex agglutination test; (3) sufficient information must be provided on study method and sample characteristics to assess the quality of the study; and (4) study samples must be representative of the general population. No limitation was set on the language of publication. For GBD 2013, the search strategy was replicated to capture epidemiological studies published between 2010 and 2013. The search strategy was repeated in 2015 only to capture excess mortality – updates to systematic reviews are

performed on an ongoing schedule across all GBD causes, and a complete update for meningitis will be performed in the GBD 2017 iteration.

Additional sources we included in the acute bacterial meningitis model were inpatient-only hospital data and US claims data from 2000, 2010, and 2012, primary diagnosis and inpatient only. Sequelae and severity splits were informed by a meta-analysis, Edmond et al (2), while an internal meta-analysis informed mortality estimates for long-term moderate to severe impairments (3).

Data were outliered or excluded if we found them unreasonable when compared to regional, super-regional, and global rates.

For GBD 2016, we also included VR proportions for mortality due to the different etiologies of meningitis to inform the proportional splits of the meningitis parent model for GBD Cause of Death modeling.

The tables below show the number of studies included in GBD 2016, as well as the number of countries or subnational units and GBD world regions represented for the bacterial meningitis model and each model that informs the etiology split.

**Table 1a. Acute bacterial meningitis**

|                        | Prevalence | Incidence | Mortality risk |
|------------------------|------------|-----------|----------------|
| Studies                | 0          | 70        | 70             |
| Countries/subnationals | 0          | 65/304    | 44/0           |
| GBD world regions      | 0          | 20        | 17             |

**Table 1b. Pneumococcal meningitis incidence proportion**

|                        | Proportion |
|------------------------|------------|
| Studies                | 67         |
| Countries/subnationals | 42/2       |
| GBD world regions      | 18         |

**Table 1c. Meningococcal meningitis incidence proportion**

|                        | Proportion |
|------------------------|------------|
| Studies                | 62         |
| Countries/subnationals | 39/2       |
| GBD world regions      | 17         |

**Table 1d. H influenza type B meningitis incidence proportion**

|                        | Proportion |
|------------------------|------------|
| Studies                | 68         |
| Countries/subnationals | 42/2       |
| GBD world regions      | 18         |

**Table 1e. Other bacterial meningitis incidence proportion**

|         | Proportion |
|---------|------------|
| Studies | 60         |



|                        |      |
|------------------------|------|
| Countries/subnationals | 37/2 |
| GBD world regions      | 16   |

## Modeling strategy

Non-fatal outcomes were modeled using a combination of custom models and DisMod-MR 2.1, with minor changes from the GBD 2015 modeling process. First, the overall incidence and prevalence of bacterial meningitis was modeled to estimate the short-term morbidity due to acute infection. This DisMod model had a set duration (1/remission) of 4 weeks with a range  $\pm 2$  weeks. Literature and surveillance/notification data were flagged with covariates, as were US claims data with year-specific covariates to be crosswalked to the reference data, which was GBD 2016 inpatient-only hospital data. We used the function in DisMod-MR 2.1 to pull in cause-specific mortality rate (CSMR) data from our CODEm and CODcorrect analyses and matched with prevalence data points for the same location. We calculated excess mortality rate to estimate priors by dividing CSMR by prevalence, calculated from remission and incidence. To help inform trends where we lack data, we applied a country-level covariate for proportion of the population at the subnational and country levels that lives within the meningitis belt in sub-Saharan Africa. We forced a positive relationship, with a lower bound of 0 and an upper bound of 2. We also applied a lag-distributed income covariate to excess mortality, log transformed and forced negative with an upper bound of 0 and a lower bound of -1. Betas and exponentiated values (which can be interpreted as an odds ratio) are shown in the tables below for study-level covariates and country-level covariates.

**Table 2. Study covariates**

| Study covariate                | Parameter | Beta                   | Exponentiated beta   |
|--------------------------------|-----------|------------------------|----------------------|
| Surveillance/notification data | Incidence | -1.23 (-1.58 to -0.89) | 0.29 (0.21 – 0.41)   |
| Literature                     | Incidence | -0.24 (-0.32 to -0.15) | 0.79 (0.73 – 0.4286) |
| Claims data – 2000             | Incidence | -0.29 (-0.35 to -0.23) | 0.75 (0.71 – 0.79)   |
| Claims data – 2010             | Incidence | -0.32 (-0.37 to -0.27) | 0.73 (0.69 – 0.76)   |
| Claims data – 2012             | Incidence | -0.36 (-0.42 to -0.31) | 0.69 (0.66 – 0.73)   |

**Table 3. Country-level covariates**

| Country-level covariate                    | Parameter        | Beta                   | Exponentiated beta |
|--------------------------------------------|------------------|------------------------|--------------------|
| Meningitis belt (proportion of population) | Incidence        | 1.52 (0.95 – 1.97)     | 4.56 (2.59 – 7.19) |
| LDI (log transformed)                      | Excess mortality | -0.28 (-0.29 to -0.26) | 0.76 (0.74 – 0.77) |

Incidence of bacterial meningitis were split into four etiologies (pneumococcal, meningococcal, *H. influenzae* type B, and other bacterial meningitis) using four incidence proportion models run in DisMod-MR 2.1. Results from these models were squeezed to sum to 1 at the draw level for each location, year, age, and sex. We applied a Hib3 vaccine coverage covariate to the *H. influenzae* type B proportion model, the proportion of the population living in the meningitis belt covariate to the meningococcal meningitis

proportion model, a PCV3 coverage covariate to the pneumococcal meningitis model, and the aforementioned 3 covariates to the other meningitis incidence model.

Data for viral meningitis were only available from hospitals or US claims data, and not from population studies, so incidence and prevalence of viral meningitis were extrapolated from bacterial meningitis incidence by applying age- and sex-specific ratios between bacterial and viral cases from a combination of hospital data and US claims data. In addition to short-term sequelae as a result of acute bacterial and viral meningitis, we also modeled the long-term outcomes from bacterial meningitis infection.

### Sequelae splits

We first split the long-term sequelae among survivors of acute infection. We calculated the acute-phase survivors by applying the excess mortality (calculated by the acute meningitis parent DisMod model) to the incidence of each etiology (excess mortality was converted to case fatality rate by  $e^{-(\text{excess mortality} \times 1/(\text{excess mortality} + \text{remission}))}$ ). The survivors were then subject for long-term sequelae by applying the post-discharge proportions of health consequences calculated by a meta-analysis by Edmond et al (2). We calculated the ratio of acute meningitis survivors that experience major long-term impairments for all etiologies, and the ratio of minor impairments to major impairments for pneumococcal meningitis versus all other etiologies (because pneumococcal meningitis showed significantly higher risk of morbidity than other etiologies). This ratio was based off a regression of log-transformed GDP and ratio values from Edmonds et al. The regression is shown below:

$$y = -0.33590 \ln(GDP) + 1.15230$$

We used these two ratios to calculate the proportions of survivors who contract a long-term minor impairment and those who contract a long-term major impairment. The proportion with major impairments were further split (again using pooled proportions from Edmond et al) into specific major impairments, which were grouped into vision loss, hearing loss, moderate-to-severe cognitive impairments, and epilepsy.

The calculated incidence of long-term sequelae was then converted to prevalence by two different approaches. For the sequelae not associated with excess mortality, which were vision loss, hearing loss, intellectual disability, motor impairment, and behavioral problems, the incidence of each age was cumulatively added up to the subsequent age (assuming half-cycle) to construct prevalence at each age. If the sequela is associated with excess mortality (epilepsy and moderate-to-severe cognitive impairments), the calculated incidence was uploaded into DisMod together with the corresponding mortality parameters (excess mortality data from the epilepsy envelope DisMod model, and standardized mortality ratio data from a neonatal encephalopathy meta-analysis, converted to excess mortality using all-cause mortality estimates) to estimate the prevalence. Vision loss, hearing loss, and epilepsy estimates were squeezed and severity split centrally.

### *Disability weights*

The basis of the GBD disability weight survey assessments are lay descriptions of sequelae highlighting major functional consequences and symptoms. The lay descriptions and disability weights for sequelae associated with each etiology are shown below.

**Table 5. Severity splits, lay descriptions, DWs**

| Severity split                     | Lay description                                                                                                                                                                                                                                                                                                    | DW (95% CI)         |
|------------------------------------|--------------------------------------------------------------------------------------------------------------------------------------------------------------------------------------------------------------------------------------------------------------------------------------------------------------------|---------------------|
| Mild behavior problems             | This person is hyperactive and has difficulty concentrating, remembering things, and completing tasks.                                                                                                                                                                                                             | 0.045 (0.028-0.066) |
| Mild hearing loss                  | This person has great difficulty hearing and understanding another person talking in a noisy place (for example, on an urban street).                                                                                                                                                                              | 0.01 (0.004-0.019)  |
| Mild hearing loss with ringing     | This person is unable to hear and understand another person talking, even in a quiet place, is unable to take part in a phone conversation. Difficulties with communicating and relating to others cause emotional impact at times (for example worry or depression).                                              | 0.021 (0.012-0.036) |
| Moderate hearing loss              | This person has great difficulty hearing and understanding another person talking in a noisy place (for example, on an urban street), and sometimes has annoying ringing in the ears.                                                                                                                              | 0.027 (0.015-0.042) |
| Moderate hearing loss with ringing | This person is unable to hear and understand another person talking, even in a quiet place, is unable to take part in a phone conversation. Difficulties with communicating and relating to others often cause worry, depression, or loneliness.                                                                   | 0.074 (0.048-0.107) |
| Moderately severe hearing loss     | Custom DW from hearing loss impairment envelope                                                                                                                                                                                                                                                                    |                     |
| Severe hearing loss                | This person is unable to hear and understand another person talking, even in a quiet place, and unable to take part in a phone conversation. Difficulties with communicating and relating to others cause emotional impact at times (for example worry or depression).                                             | 0.158 (0.105-0.227) |
| Profound hearing loss              | This person is unable to hear and understand another person talking, even in a quiet place, is unable to take part in a phone conversation, and has great difficulty hearing anything in any other situation. Difficulties with communicating and relating to others often cause worry, depression, or loneliness. | 0.204 (0.134-0.288) |
| Complete hearing loss              | This person cannot hear at all in any situation, including even the loudest sounds, and cannot communicate verbally or use a phone. Difficulties with communicating and relating to others often cause worry, depression, or loneliness.                                                                           | 0.215 (0.144-0.307) |
| Severe hearing loss with ringing   | This person is unable to hear and understand another person talking, even in a quiet place, is unable to take part in a phone conversation, and has annoying ringing in the ears for more than 5 minutes                                                                                                           | 0.261 (0.175-0.36)  |

|                                            |                                                                                                                                                                                                                                                                                                                                                                                                     |                     |
|--------------------------------------------|-----------------------------------------------------------------------------------------------------------------------------------------------------------------------------------------------------------------------------------------------------------------------------------------------------------------------------------------------------------------------------------------------------|---------------------|
|                                            | at a time, almost every day. Difficulties with communicating and relating to others cause emotional impact at times (for example worry or depression),                                                                                                                                                                                                                                              |                     |
| Profound hearing loss with ringing         | This person is unable to hear and understand another person, even in a quiet place, is unable to take part in a phone conversation, has great difficulty hearing anything in any other situation, and has annoying ringing in the ears for more than 5 minutes at a time, several times a day. Difficulties with communicating and relating to others often cause worry, depression, or loneliness, | 0.277 (0.182-0.387) |
| Complete hearing loss with ringing         | This person cannot hear at all in any situation, including even the loudest sounds, and cannot communicate verbally or use a phone, and has very annoying ringing in the ears for more than half of the day. Difficulties with communicating and relating to others often cause worry, depression, or loneliness,                                                                                   | 0.316 (0.212-0.435) |
| Moderate motor impairment                  | This person has some difficulty in moving around, and difficulty in lifting and holding objects, dressing and sitting upright, but is able to walk without help.                                                                                                                                                                                                                                    | 0.061 (0.04-0.089)  |
| Moderate motor plus cognitive impairments  | This person has some difficulty in moving around, holding objects, dressing and sitting upright, but can walk without help. This person has low intelligence and is slow in learning to speak and to do simple tasks.                                                                                                                                                                               | 0.203 (0.134-0.29)  |
| Long-term mild motor impairment            | This person has some difficulty in moving around but is able to walk without help.                                                                                                                                                                                                                                                                                                                  | 0.01 (0.005-0.02)   |
| Borderline intellectual disability         | This person is slow in learning at school. As an adult, the person has some difficulty doing complex or unfamiliar tasks but otherwise functions independently.                                                                                                                                                                                                                                     | 0.011 (0.005-0.02)  |
| Severe motor impairment                    | This person is unable to move around without help, and is not able to lift or hold objects, get dressed or sit upright.                                                                                                                                                                                                                                                                             | 0.402 (0.268-0.545) |
| Epilepsy                                   | (combined DW)                                                                                                                                                                                                                                                                                                                                                                                       | NA                  |
| Blindness                                  | Is completely blind, which causes great difficulty in some daily activities, worry and anxiety, and great difficulty going outside the home without assistance.                                                                                                                                                                                                                                     | 0.187 (0.124-0.26)  |
| Severe acute episode of infectious disease | This person has a high fever and pain, and feels very weak, which causes great difficulty with daily activities.                                                                                                                                                                                                                                                                                    | 0.133 (0.088-0.19)  |
| Mild intellectual disability               | This person has low intelligence and is slow in learning at school. As an adult, the person can live independently, but often needs help to raise children and can only work at simple supervised jobs.                                                                                                                                                                                             | 0.043 (0.026-0.065) |

|                                         |                                                                                                                                                                                                                                                   |                     |
|-----------------------------------------|---------------------------------------------------------------------------------------------------------------------------------------------------------------------------------------------------------------------------------------------------|---------------------|
| Monocular distance vision loss          | This person is blind in one eye and has difficulty judging distances                                                                                                                                                                              | 0.017 (0.009-0.029) |
| Mild motor plus cognitive impairments   | This person has some difficulty in moving around but is able to walk without help. The person is slow in learning at school. As an adult, the person has some difficulty doing complex or unfamiliar tasks but otherwise functions independently. | 0.031 (0.018-0.05)  |
| Severe motor plus cognitive impairments | This person cannot move around without help, and cannot lift or hold objects, get dressed or sit upright. The person also has very low intelligence, speaks few words, and needs constant supervision and help with all daily activities.         | 0.542 (0.37-0.702)  |

# Encephalitis

## Flowchart

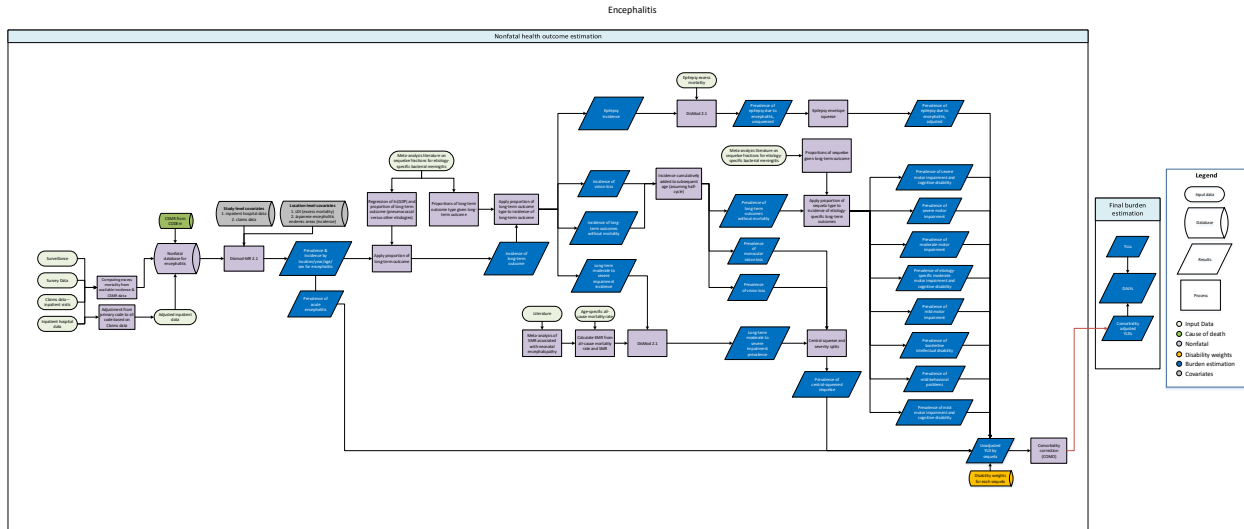

## Case definition

Encephalitis is a disease caused by an acute inflammation of the brain. Symptoms of encephalitis can include flu-like symptoms like headache, fever, drowsiness, and fatigue, and at times, seizures, hallucinations, or stroke. Included in the GBD modeling were cases meeting ICD-10 diagnostic criteria for encephalitis (A83-A86.4, B94.1, F07.1, G04-G05.8) (1).

## Input data

### Model inputs

In the GBD 2010 study, a systematic review of literature was conducted to capture studies of incidence, excess mortality rate, remission, and standardized mortality ratio for encephalitis. These data sources included hospital data and literature. The inclusion criteria stipulated that: (1) the publication year must be between 1980 and 2010; (2) sufficient information must be provided on study method and sample characteristics to assess the quality of the study; and (3) study samples must be representative of the general population. No limitation was set on the language of publication. For GBD 2013, the GBD 2010 search strategy was replicated to capture epidemiological studies published between 2010 and 2013. We did not do a literature review for GBD 2016.

Additional sources we included in the acute bacterial meningitis model were inpatient-only hospital data and US claims data from 2000, 2010, and 2012, primary diagnosis and inpatient only. Sequelae and severity splits were informed by a meta-analysis, Edmond et al (2), while an internal meta-analysis informed mortality estimates for long-term moderate-to-severe impairments (3).

Data were outliered or excluded if we found they differed significantly when compared to regional, super-regional, and global rates.

The tables below show the number studies included in GBD 2016, as well as the number of countries or subnational units and GBD world regions represented for the encephalitis.

**Table 1. Acute encephalitis**

|                        | Prevalence | Incidence |
|------------------------|------------|-----------|
| Studies                | 0          | 26        |
| Countries/subnationals | 0          | 37/291    |
| GBD world regions      | 0          | 16        |

### Modeling strategy

Non-fatal outcomes were modeled using a combination of custom models and DisMod-MR 2.2, with minor changes from the GBD 2015 modeling process. First, the overall incidence and prevalence of encephalitis was modeled to estimate the short-term morbidity due to acute infection. This DisMod model had a set duration (1/remission) between 2.9 and 3.1 weeks. We also imposed caps on excess mortality for ages 10-50, and a cap on incidence from ages 10-100. US claims data and literature data were flagged with year-specific covariates to be crosswalked to the reference data, which were inpatient-only, primary diagnosis hospital data. We used the function in DisMod-MR 2.1 to pull in cause-specific mortality rate (CSMR) data from our CODEm and CODcorrect analyses and match with incidence data points for the same location. We calculated excess mortality rate to estimate priors by dividing CSMR by prevalence, calculated from remission and incidence. To help inform trends where we lack data, we applied a binary country-level covariate at the subnational and country level that indicates if the location is in a Japanese Encephalitis endemic area (4). We forced a positive relationship, with a lower bound of 0 and an upper bound of 0.1. We also applied a lag-distributed income covariate to excess mortality, log transformed and forced negative with an upper bound of 0 and a lower bound of -1. Betas and exponentiated values (which can be interpreted as an odds ratio) are shown in the tables below for study-level covariates and country-level covariates.

**Table 2. Study covariates**

| Study covariate    | Parameter | beta                   | Exponentiated beta |
|--------------------|-----------|------------------------|--------------------|
| Claims data – 2000 | Incidence | -0.81 (-0.84 to -0.78) | 0.44 (0.43 – 0.46) |
| Claims data – 2010 | Incidence | -0.56 (-0.59 to -0.54) | 0.57 (0.55 – 0.58) |
| Claims data – 2012 | Incidence | -0.45 (-0.47 to -0.42) | 0.64 (0.62 – 0.65) |
| Literature         | Incidence | -1.23 (-1.36 to -1.13) | 0.29 (0.26 – 0.32) |

**Table 3. Country-level covariates**

| Country-level covariate                     | Parameter | beta                  | Exponentiated beta |
|---------------------------------------------|-----------|-----------------------|--------------------|
| Japanese Encephalitis endemic area (binary) | Incidence | 0.068 (0.030 – 0.097) | 1.07 (1.03 – 1.10) |

|                       |                  |                            |                    |
|-----------------------|------------------|----------------------------|--------------------|
| LDI (log transformed) | Excess mortality | -0.015 (-0.055 to -0.0002) | 0.99 (0.95 – 1.00) |
|-----------------------|------------------|----------------------------|--------------------|

In addition to short-term sequelae as a result of acute encephalitis, we also modeled the long-term outcomes from encephalitis.

**Sequelae Splits**

We first split the long-term sequelae among survivors of acute infection. We calculated the acute phase survivors by applying the excess mortality (calculated by the acute meningitis DisMod model) to the incidence of each etiology (excess mortality was converted to case fatality rate by  $e^{-(\text{excess mortality} \times 1/(\text{excess mortality} + \text{remission}))}$ ). The survivors were then subject to long-term sequelae by applying the post-discharge proportions of health consequences calculated by a meta-analysis by Edmond et al (2). We calculated the ratio of acute encephalitis survivors that result in a major long-term impairment, and the ratio of minor impairments to major impairments, based off a regression of log-transformed GDP and ratio values from Edmonds et al. The regression is shown below:

$$y = -0.33590 \ln(GDP) + 1.15230$$

We assumed a similar pattern of health outcomes for encephalitis infection survivors as with other bacterial meningitis survivors (except hearing loss, as we could not find evidence of hearing loss as a consequence of encephalitis infection). We used these two ratios to calculate the proportions of survivors who contract a long-term minor impairment and those who contract a long-term major impairment. The proportion with major impairments were further split (again using pooled proportions from Edmond et al) into specific major impairments, which were grouped into vision loss, moderate to severe cognitive impairments, and epilepsy.

The calculated incidence of long-term sequelae was then converted to prevalence by two different approaches. For the sequelae not associated with excess mortality, which were vision loss, intellectual disability, motor impairment, and behavioral problems, the incidence of each age was cumulatively added up to the subsequent age (assuming half-cycle) to construct prevalence at each age. If the sequela is associated with excess mortality (epilepsy and moderate-to-severe cognitive impairments), the calculated incidence was uploaded into DisMod together with the corresponding mortality parameters (excess mortality data from the epilepsy envelope DisMod model, and standardized mortality ratio data from a neonatal encephalopathy meta-analysis, converted to excess mortality using all-cause mortality estimates) to estimate the prevalence. Vision loss and epilepsy estimates were squeezed and severity split centrally.

*Disability weights*

The basis of the GBD disability weight survey assessments is lay descriptions of sequelae highlighting major functional consequences and symptoms. The lay descriptions and disability weights for sequelae associated with encephalitis are shown below.

**Table 4. Severity splits, lay descriptions, and DWs**

| Severity split | Lay description | DW (95% CI) |
|----------------|-----------------|-------------|
|----------------|-----------------|-------------|



|                                           |                                                                                                                                                                                                                                                   |                     |
|-------------------------------------------|---------------------------------------------------------------------------------------------------------------------------------------------------------------------------------------------------------------------------------------------------|---------------------|
| Mild behavior problems                    | This person is hyperactive and has difficulty concentrating, remembering things, and completing tasks.                                                                                                                                            | 0.045 (0.028-0.066) |
| Moderate motor impairment                 | This person has some difficulty in moving around, and difficulty in lifting and holding objects, dressing and sitting upright, but is able to walk without help.                                                                                  | 0.061 (0.04-0.089)  |
| Moderate motor plus cognitive impairments | This person has some difficulty in moving around, holding objects, dressing and sitting upright, but can walk without help. This person has low intelligence and is slow in learning to speak and to do simple tasks.                             | 0.203 (0.134-0.29)  |
| Long- term mild motor impairment          | This person has some difficulty in moving around but is able to walk without help.                                                                                                                                                                | 0.01 (0.005-0.02)   |
| Borderline intellectual disability        | This person is slow in learning at school. As an adult, the person has some difficulty doing complex or unfamiliar tasks but otherwise functions independently.                                                                                   | 0.011 (0.005-0.02)  |
| Severe motor impairment                   | This person is unable to move around without help, and is not able to lift or hold objects, get dressed, or sit upright.                                                                                                                          | 0.402 (0.268-0.545) |
| Epilepsy                                  | (combined DW)                                                                                                                                                                                                                                     | NA                  |
| Blindness                                 | Is completely blind, which causes great difficulty in some daily activities, worry and anxiety, and great difficulty going outside the home without assistance.                                                                                   | 0.187 (0.124-0.26)  |
| Acute encephalitis                        | This person has a high fever and pain, and feels very weak, which causes great difficulty with daily activities.                                                                                                                                  | 0.133 (0.088-0.19)  |
| Mild intellectual disability              | This person has low intelligence and is slow in learning at school. As an adult, the person can live independently but often needs help to raise children and can only work at simple supervised jobs.                                            | 0.043 (0.026-0.065) |
| Monocular distance vision loss            | This person is blind in one eye and has difficulty judging distances                                                                                                                                                                              | 0.017 (0.009-0.029) |
| Mild motor plus cognitive impairments     | This person has some difficulty in moving around but is able to walk without help. The person is slow in learning at school. As an adult, the person has some difficulty doing complex or unfamiliar tasks but otherwise functions independently. | 0.031 (0.018-0.05)  |
| Severe motor plus cognitive impairments   | This person cannot move around without help, and cannot lift or hold objects, get dressed or sit upright. The person also has very low intelligence, speaks few words, and needs constant supervision and help with all daily activities.         | 0.542 (0.37-0.702)  |

No other significant changes were made to the modeling process for GBD 2016.

# Diphtheria

## Flowchart

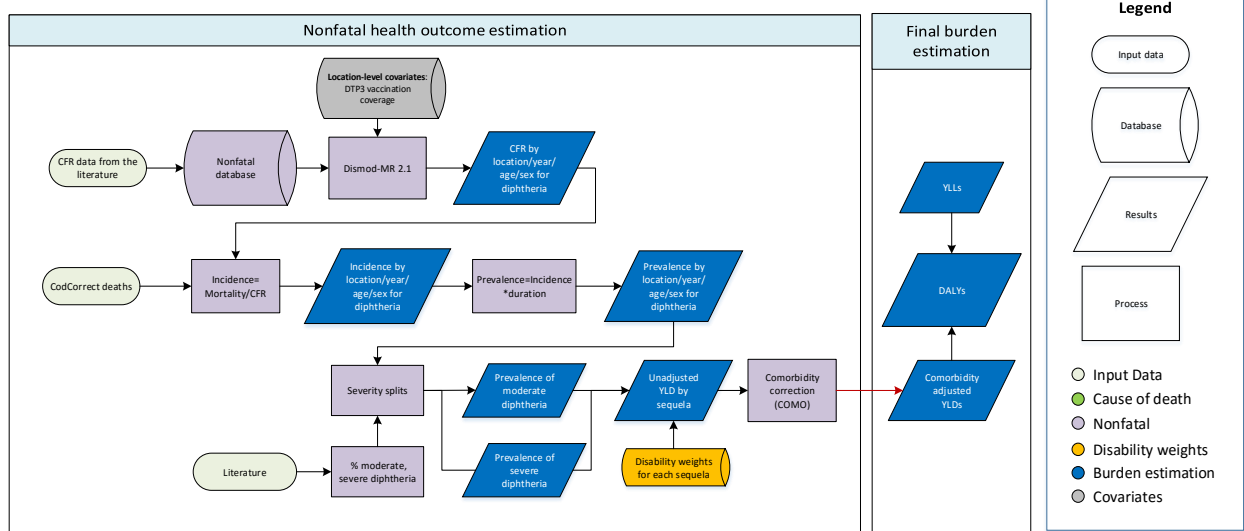

## Case definition

Diphtheria is a bacterial infection caused by *Corynebacterium diphtheriae*. For diphtheria, ICD 10 codes are A36-A36.9, Z22.2, Z23.6, and ICD9 codes are 032-032.9, V02.4, V03.5, and V74.3.

## Input data

### Model inputs

For GBD 2016, input data included case fatality rate data from a systematic review of the literature and diphtheria mortality estimates from a negative binomial regression model.

A systematic review of diphtheria case fatality was conducted for GBD 2016 to add to the literature used in GBD 2013. The PubMed search terms were: ((diphtheria[Title/Abstract] AND case fatality[Title/Abstract])) AND ("2013"[Date - Publication]: "2016"[Date - Publication]).

### Severity split & disability weights

We draw primarily on the literature, as well as patterns in data observed in South Asia and Central Asia, to assign the following severity distributions for diphtheria: 70% (95% CI:66.5–73.5%) moderate and 30% (95% CI: 26.5–33.5%) severe cases. The lay descriptions and disability weights for diphtheria severity levels derived from the GBD Disability Weights study are shown below.

**Table 1. Severity splits, lay descriptions, and disability weights (DW)**

| Severity level      | Lay description                                                                                      | DW (95% CI)         |
|---------------------|------------------------------------------------------------------------------------------------------|---------------------|
| Moderate diphtheria | Has a fever and aches, and feels weak, which causes some difficulty with daily activities.           | 0.051 (0.032–0.074) |
| Severe diphtheria   | Has a high fever and pain, and feels very weak, which causes great difficulty with daily activities. | 0.133 (0.088–0.19)  |

## Modelling strategy

We used DisMod-MR 2.1 as a meta-regression tool to pool the case fatality data and generate location-year-age-sex-specific case fatality rate estimates. We used lag-distributed income and the IHME health care access and quality index as location-level covariates. Diphtheria mortality was modelled using a negative binomial regression and data from the cause of death database with the DTP3 coverage covariate and age dummy variables. Incidence was then calculated as mortality rate divided by case fatality rate. Prevalence was calculated by multiplying incidence and duration, which was estimated to be a mean of 27.5 days, based on a meta-analysis of duration data from the literature.

The table below shows model covariate coefficients and exponentiated values (from the DisMod case-fatality model), which can be interpreted as odds ratios.

**Table 2. Beta and exponentiated beta values**

| Covariate                  | Parameter     | Coefficient (95% CI) | Exponentiated coefficient (95% CI) |
|----------------------------|---------------|----------------------|------------------------------------|
| DTP3 coverage (proportion) | Case fatality | -0.18 (-0.66, -0.01) | 0.84 (0.52, 0.99)                  |
| Sex                        | Case fatality | 0.15 (-0.58, 0.90)   | 1.16 (0.56, 2.46)                  |

No other significant changes were made to the modelling strategy for GBD 2016.

# Pertussis (whooping cough)

## Flowchart

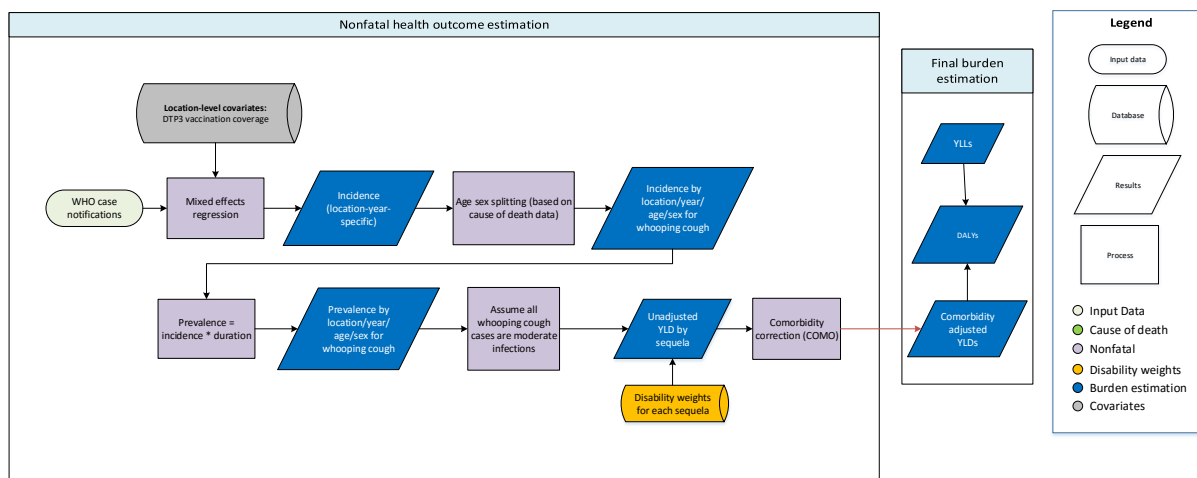

## Case definition

Pertussis (whooping cough), is a contagious respiratory disease caused by the bacterium *Bordetella pertussis*. For pertussis, ICD 10 codes are A37-A37.91, Z23.7, and ICD 9 codes are 033-033.9, 484.3, V03.6.

## Input data

### Model inputs

For the GBD 2016 nonfatal estimation process, the primary source of input data was pertussis case notifications from the World Health Organization (WHO). We also used historical case notifications for the UK back to 1940 to inform the whooping cough natural history model.

### Severity splits

For GBD 2015, we assumed all pertussis cases were moderate episodes of acute infectious disease because of associated symptoms and MEPS data. The lay description and disability weight derived from the GBD Disability Weights study are shown below.

**Table 1. Severity splits, lay descriptions, and disability weights**

| Severity level | Lay description                                                                           | DW (95% CI)            |
|----------------|-------------------------------------------------------------------------------------------|------------------------|
| Moderate       | Has a fever and aches and feels weak, which causes some difficulty with daily activities. | 0.051<br>(0.032–0.074) |

## Modelling strategy

We modelled log-transformed incidence with a mixed-effects linear regression of case notifications from WHO (1985–2015) on diphtheria-tetanus-pertussis dose 3 (DTP3) vaccination coverage. Historical data of United Kingdom (UK) pertussis cases and UK DTP3 coverage rates (both back to 1940) were also used to inform the incidence model. The random effect by country allowed for registration completeness to vary by country. The results of this model were then used to predict incidence as a function of vaccine coverage. To correct for underreporting in case notifications, we used a value of the random effect that matched the highest random effect in a high income region – Switzerland (which has a pertussis monitoring system which captures a high percentage of cases) – to get an implied attack rate assumed to be the same for all unvaccinated populations. Uncertainty was estimated by taking 1,000 iterations of the predictions based on the variance-covariance matrix. Prevalence was calculated by multiplying incidence by an average duration assumed to be 50 days.

# Tetanus

## Flowchart

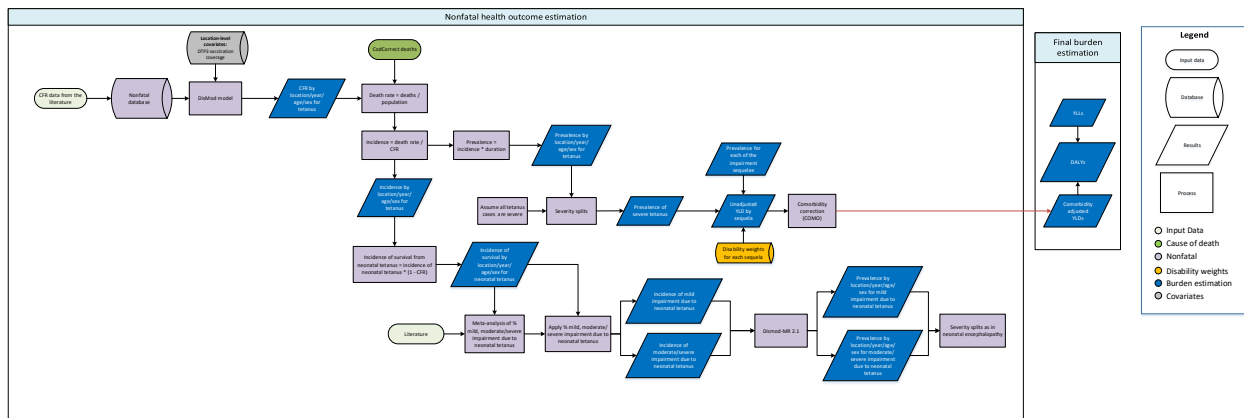

## Case definition

Tetanus is a serious bacterial disease caused by the bacterium *Clostridium tetani*. For tetanus, the ICD 10 codes are A33-A35.0, Z23.5, and ICD 9 codes are 037-037.9, 771.3, V03.7.

## Input data

### Model inputs

For GBD 2016, input data for the estimation of tetanus included case fatality rate data extracted from a systematic review the literature and IHME tetanus mortality estimates calculated with CODEm.

A systematic review was conducted for GBD 2016. The PubMed search terms were: (tetanus[Title/Abstract]) AND (case fatality[Title/Abstract]) AND ("2013"[Date - Publication]: "2016"[Date - Publication]).

### Severity split & disability weights

We assume that all tetanus cases are severe episodes of acute infectious diseases. The lay descriptions and disability weights for tetanus derived from the GBD Disability Weights study are shown below.

**Table 1. Severity splits, lay descriptions, and disability weights (DW)**

| Severity level | Lay description                                                                                      | DW (95% CI)           |
|----------------|------------------------------------------------------------------------------------------------------|-----------------------|
| Severe         | Has a high fever and pain, and feels very weak, which causes great difficulty with daily activities. | 0.133<br>(0.088–0.19) |

Regarding the severity level of impairment due to neonatal tetanus, we assume the same distribution as in neonatal encephalopathy.

## Modelling strategy

We used DisMod-MR 2.0 as a meta-regression tool to pool the case fatality data and generate location-year-age-sex-specific case fatality rate estimates. We used DTP3 coverage as a location-level covariate. Mortality was modelled using the standard CODEm tool on neonatal tetanus (ages 0-0.1) and non-neonatal tetanus (ages 1-80) separately for males and females. Incidence was then calculated as:

$$\text{Incidence} = \text{mortality rate} / \text{case fatality rate}$$

Prevalence was then computed based on the estimated incidence and duration draws derived from literature review.

To estimate mild and moderate impairment due to neonatal tetanus, we first computed the incidence of survival from neonatal tetanus as:

$$\text{Incidence of survival} = \text{incidence} * (1 - \text{CFR})$$

We then conducted a meta-analysis of published studies to estimate the proportion of mild impairment due to neonatal tetanus and moderate-to-severe impairment due to neonatal tetanus. We applied these proportions to the estimated incidence of survival, to generate incidence of mild impairment due to neonatal tetanus and moderate-to-severe impairment due to neonatal tetanus, which were used as input data in DisMod 2.0. We ran two separate DisMod models (one for mild impairment due to neonatal tetanus, and one for moderate-to-severe impairment due to neonatal tetanus) to generate age-sex-year-country-specific estimates.

The table below shows betas and exponentiated values for the covariates used in the estimation process (from the DisMod case-fatality model), which can be interpreted as an odds ratio.

**Table 3. Beta and exponentiated beta values**

| Covariate                  | Parameter     | Beta (95% CI)        | Exponentiated beta (95% CI) |
|----------------------------|---------------|----------------------|-----------------------------|
| DTP3 coverage (proportion) | Case fatality | 0.52 (-0.061 — 1.32) | 1.68 (0.94 — 3.76)          |
| Sex                        | Case fatality | -0.12 (-0.35 — 0.10) | 0.89 (0.71 — 1.11)          |

No other significant changes were made to the modelling strategy for GBD 2016.

## Measles

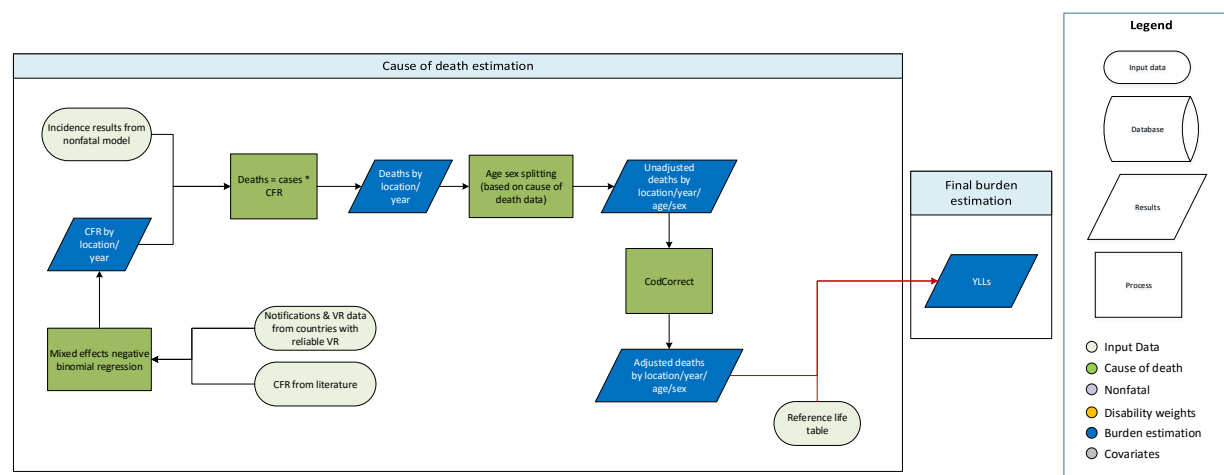

### Input data

Vital registration data from the cause of death database were used for data-rich countries. To inform the natural history model, we used data from the following sources: World Health Organization (WHO) case notifications from 1995 to 2015; case notifications identified by collaborators; vital registration (VR) data in countries in the following three super-regions: high-income, Central Europe/Eastern Europe/Central Asia, and Latin America and Caribbean; and case fatality data identified through systematic literature reviews for GBD 2010, GBD 2013, and GBD 2016. The PubMed search query for GBD 2016 was: (measles [Title/Abstract]) AND (case fatality [Title/Abstract]) AND ("2013"[Date - Publication]: "2016"[Date - Publication]). Studies were included if they reported case fatality rate, number of deaths, and number of cases. Studies were excluded if they included non-representative samples only.

### Modelling strategy – data-rich countries

Mortality was modelled separately for data-rich and other countries. For data-rich countries (ie, countries with vital registration more than 95% complete for more than 25 years), we used a general CODEm strategy to model VR data with measles-containing vaccination dose one (MCV1) coverage, childhood malnutrition, lagged distributed income, the Healthcare Access and Quality Index, and education as country-level covariates. We made estimations for the age range post-neonatal to 59 years.

### Modelling strategy – other countries

Measles mortality in the remaining countries was modelled using a natural-history-based model. First, we modelled measles incidence with a mixed-effects linear regression of case notifications from WHO (1995–2015) on routine measles vaccination rates and supplementary immunization activities (SIAs). More precisely, log-transformed incidence rates were regressed on the log of the proportion unvaccinated with first- and second-dose measles-containing vaccine, and additional SIA coverage



lagged by one, two, three, four, and five years, with super-region, region, and country-level random effects. The results of this mixed-effects regression model were then used to predict location-year-specific incidence as a function of routine vaccine coverage and SIAs. To correct for underreporting in case notifications, we added the effect of a 95% attack rate, assumed to be the same across all unvaccinated populations. Uncertainty was estimated by taking 1,000 iterations of the predictions based on the variance-covariance matrix. For locations in three super-regions – high-income, Central Europe/Eastern Europe/Central Asia, and Latin America and Caribbean – we used reported measles cases as incident cases.

Second, the case fatality rate was modelled using a mixed-effects negative binomial regression with the child malnutrition covariate and study-level indicators (hospital-based or not; outbreak or not; and rural or urban/mixed), with country random effects. Uncertainty was estimated by taking 1,000 iterations of the predictions based on the variance-covariance matrix and uncertainty in country random effects. The fit of the model was evaluated using diagnostic plots of predicted versus observed values. Finally, estimated deaths were calculated at the 1,000-draw level as

$$deaths = incidence * CFR.$$

We estimated overall number of deaths and then assigned an age-sex distribution based on the age- and sex-specific patterns found in the cause of death data. We made estimations for the age range post-neonatal to 59 years.

# Varicella and herpes zoster

## Flowchart

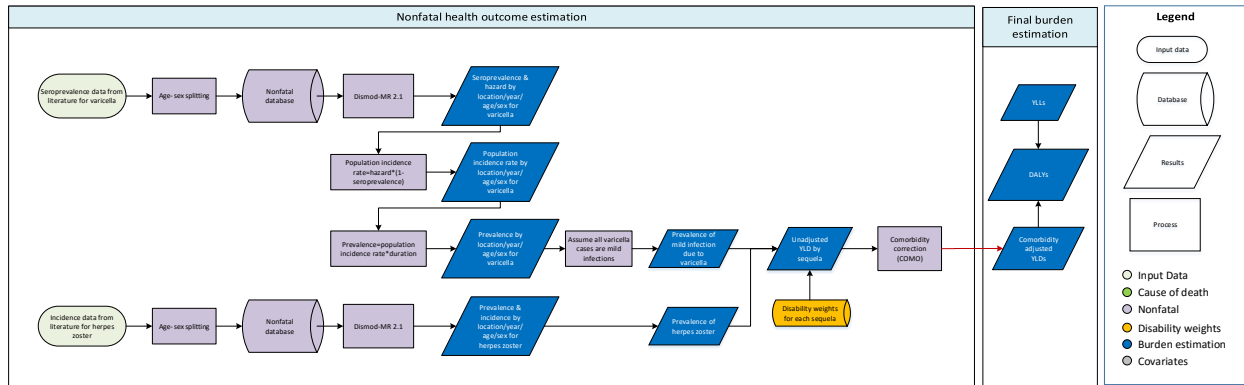

## Case definition

Varicella (also known as chicken pox) is an acute infectious disease caused by varicella zoster virus. Herpes zoster (also known as shingles), is caused by the reactivation of the same virus that causes varicella. For varicella and herpes zoster, the ICD 10 codes are B01-B02.9, P35.8, Z20.820, and ICD 9 codes are 052-053.9, V01.71, V01.79, V05.4.

## Input data

### Model inputs

Input data for varicella were from published seroprevalence studies, and that for herpes zoster were from published incidence studies.

A systematic review was done for both varicella and herpes zoster for GBD 2016. The PubMed search query for varicella was as follows: (varicella[Title/Abstract] AND seroprevalence[Title/Abstract]) AND (incidence[Title/Abstract] OR prevalence[Title/Abstract]) NOT (herpes zoster[Title/Abstract] OR shingles[Title/Abstract]) AND ("2013"[Date - Publication] : "2016"[Date - Publication]).

The PubMed search query for herpes zoster was as follows: ((herpes zoster[Title/Abstract] OR shingles[Title/Abstract]) AND (incidence[Title/Abstract])) NOT (varicella[Title/Abstract] OR chicken pox[Title/Abstract]) AND ("2013"[Date - Publication] : "2016"[Date - Publication])

The exclusion criteria were:

10. Studies that were not population-based, eg, hospital or clinic-based studies
11. Studies that did not provide primary data on epidemiological parameters, eg, commentaries
12. Review articles
13. Case series
14. Self-reported cases

### Severity splits & disability weights

We assume all varicella cases are mild episodes of acute infectious disease. Herpes zoster was a sequela studied in the GBD disability weight study. The lay descriptions and corresponding disability weights are presented in the table below.

**Table 1. Severity level, lay description, and disability weights (DW)**

| Severity level                | Lay description                                                              | DW (95% CI)            |
|-------------------------------|------------------------------------------------------------------------------|------------------------|
| Mild acute infectious disease | Has a low fever and mild discomfort but no difficulty with daily activities. | 0.006<br>(0.002–0.012) |
| Herpes zoster                 | Has a blistering skin rash that causes pain, with some burning and itching.  | 0.058<br>(0.035–0.09)  |

### Modelling strategy

The modelling strategies for varicella and herpes zoster are outlined below:

I. Varicella seroprevalence data were first run through DisMod-MR 2.0. Detailed steps in the estimation of incidence and prevalence are shown below:

1. Model varicella seroprevalence data as prevalence in DisMod, after specifying zero remission and no excess mortality
2. Pick up incidence draws (which are actually hazards) from DisMod
3. Calculate population incidence rate = hazard \*(1-prevalence) at the draw level
4. Calculate prevalence as prevalence = population incidence rate\*duration (assumed to be 7 days)

II. Herpes Zoster morbidity was modeled using a standard DisMod model. We assume no excess mortality associated with herpes zoster.

Betas and exponentiated values (which can be interpreted as an odds ratio) are shown in the tables below.

**Table 3a. Varicella DisMod model**

| Covariate  | Parameter      | Beta (95% CI)         | Exponentiated beta (95% CI) |
|------------|----------------|-----------------------|-----------------------------|
| Sex (male) | Seroprevalence | -0.075 (-0.85 — 0.75) | 0.93 (0.43 — 2.12)          |

**Table 3b. Herpes zoster DisMod model**

| Covariate | Parameter | Beta (95% CI)           | Exponentiated beta (95% CI) |
|-----------|-----------|-------------------------|-----------------------------|
| Sex       | Incidence | -0.14 (-0.28 — -0.0049) | 0.87 (0.76 — 1.00)          |

No other significant changes were made to the GBD 2016 modelling strategy.

# Malaria

## Flowchart

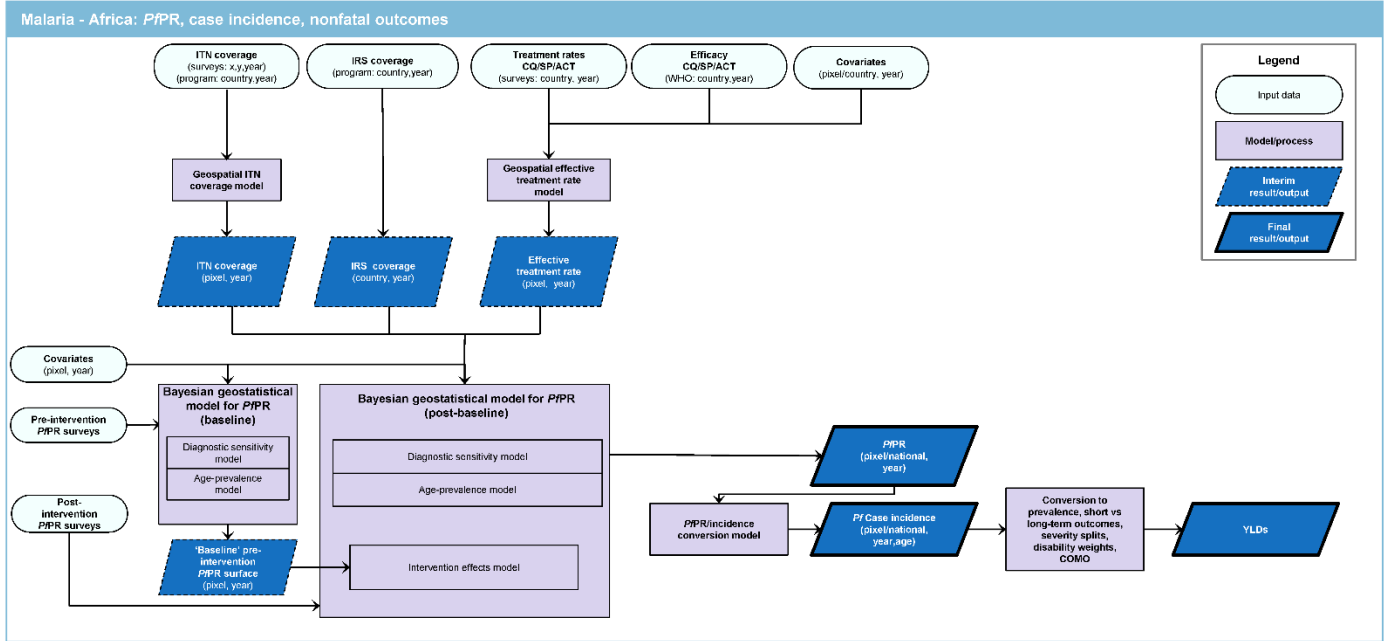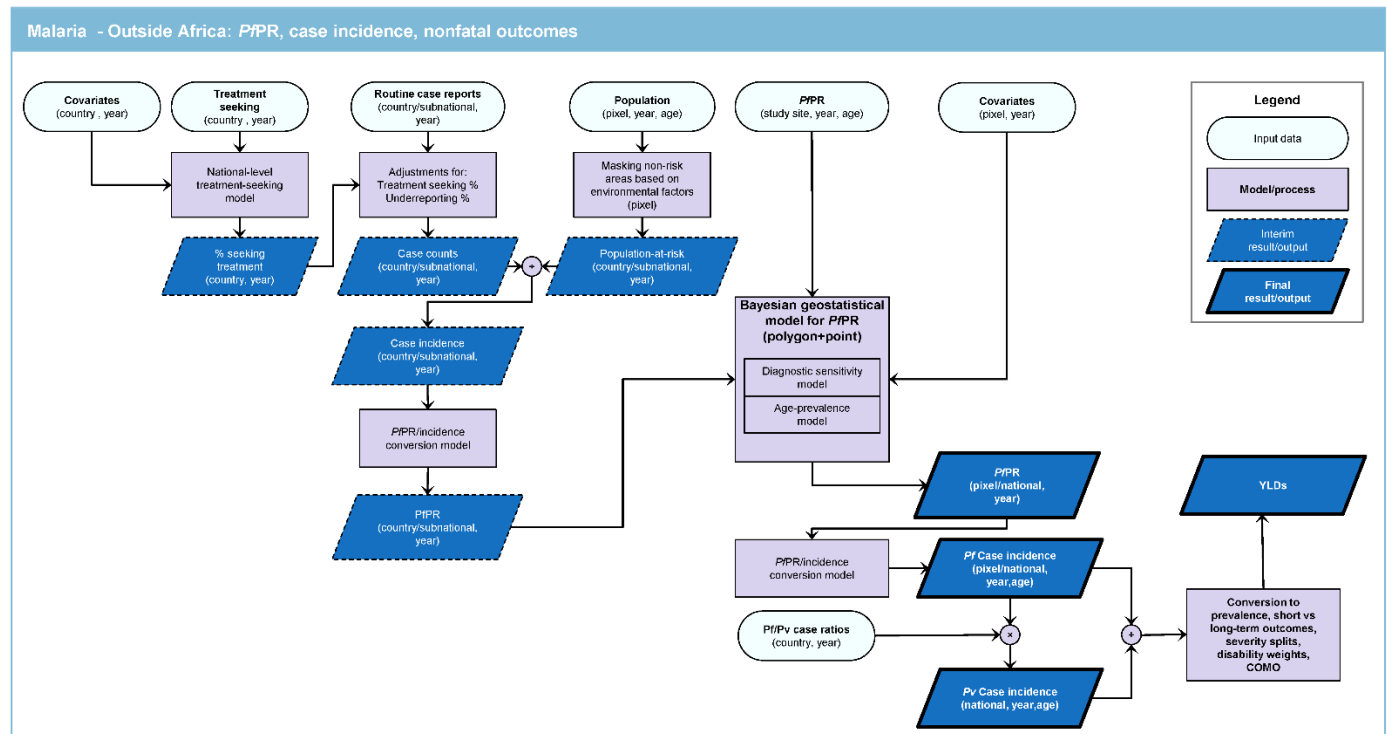

## Case definition

Malaria is an acute parasitic mosquito-borne disease. An individual with uncomplicated malaria experiences one to two weeks of persistent fever, chills/shivering, sweating, joint pains and headache. The individual will likely be lethargic and feverish, causing loss of daily function during the attack. Individuals with an untreated *P. falciparum* infection may develop severe malaria, which includes the symptoms of uncomplicated malaria plus potentially swelling, difficulty breathing, unconsciousness, and death. Rapid diagnostic test or microscopy are considered the gold-standard diagnostic approaches for the purposes of GBD. The relevant ICD-10 codes are B50-B54.

## Data input

Primary data inputs were:

- (i) Routine malaria case reports from national routine surveillance systems. These were obtained at national level from the WHO World Malaria Report and at the subnational administrative level, wherever possible, via an exhaustive search of published and grey literature sources along with online data portals hosted by national ministries of health. Each retained record consisted of an annual count of malaria cases along with breakdown by whether confirmed/unconfirmed and by malaria parasite species.
- (ii) Cross-sectional geolocated community-representative observations of infection prevalence for *Plasmodium falciparum* (referred to hereafter as *P. falciparum* parasite rate, *PfPR*).

These malaria epidemiological metrics were augmented in the modelling by:

- (iii) Malaria Atlas Project (MAP) modelled estimates of malaria control intervention population coverage (ITNs, IRS, antimalarials) resolved to 5 km x 5 km pixel-year level (for Africa) and country-year level (outside Africa).
- (iv) A large suite of environmental, sociodemographic, and economic covariates resolved to 5 km x 5 km pixel-year level (for Africa) and country-year level (outside Africa).

## Modelling strategy

The suitability, availability, and quality of *PfPR* and routine case reporting data, as well as detailed intervention coverage information, differ markedly inside versus outside Africa. This meant we developed separate modelling strategy for countries inside Africa versus those outside. The exceptions were Algeria, Egypt, Morocco, Comoros, Mauritius, Cape Verde, Sao Tome, Principe, Rwanda, Botswana, Namibia, Eritrea, Djibouti, and South Africa which, despite being part of Africa, have epidemiologies and data availability/quality more akin to non-African settings.

### *PfPR* and case incidence modelling: Africa

Modelling was conducted in the following steps:

- (i) The large assembly of geolocated *PfPR* surveys maintained by MAP was used in a Bayesian spatiotemporal geostatistical model to predict *PfPR* for every pixel-year in sub-Saharan Africa, representing an update to earlier work (Bhatt et al Nature, Gething et al NEJM). The model took into account (i) *PfPR* survey participant age ranges and diagnostic type; (ii) coverage of ITNs, IRS, and effective antimalarial drug coverage and how these changed through time at

- each data and prediction location; (iii) environmental conditions at each data and prediction location (including density of vegetation, temperature, humidity, rainfall, elevation, proximity to populated areas). The outcome was a predicted space-time “cube” of *PfPR*, standardized to the 2-10 age range, for each year 1980–2016.
- (ii) The *PfPR* cube was then converted into an equivalent cube of the predicted incidence rate of clinical malaria. This conversion was achieved using an established model (Cameron et al Nature Communications) and allowed estimates stratified into three broad age bins (0-5; 5-15; <15).

#### *PfPR* and case incidence modelling: Outside Africa

Malaria endemic countries outside Africa tend to have less *PfPR* data than those inside, in part because prevalence is generally lower and thus *PfPR* becomes an inefficient way to measure malaria risk. Conversely, routine surveillance systems outside Africa are generally stronger, meaning that reports of malaria cases from health systems are more reliable and provide some insight into the total malaria burden in the community. Modelling outside Africa was carried out in the following steps:

- (i) National and subnational case reports were first subject to adjustments to identify and minimize bias. Bias in reported case numbers arises from various sources. First, a fraction of cases in the community will either seek no care or attend only a private or informal health care provider who would not provide a record of that case to the routine surveillance system. We adjusted for this by modelling the fraction of cases seeking care from different provider categories based on data from nationally representative cross-sectional household surveys (primarily from the Demographic and Health Survey (DHS) program and the Multiple Indicator Cluster Survey program). Second, cases reaching formal clinics may not be subject to a confirmatory diagnostic test. We adjusted for this by assuming the fraction of unconfirmed cases that were truly malaria would equal the fraction of positives among all those tested. Third, many routine surveillance systems fail to capture all case reports, with certain facilities/regions missing from the national totals in a given year. We adjusted for this based on reporting completeness statistics published nationally by WHO.
- (ii) These adjusted routine case reports were georeferenced using digitized administrative boundary data using a large library of such boundaries maintained by MAP.
- (iii) Each case report was converted to an estimate of clinical incidence rate by dividing over the estimated population at risk in each unit, with the latter quantity derived by combing high-resolution gridded population data with MAP models that exclude malaria risk based on aridity or temperature ranges not conducive to transmission.
- (iv) The incidence rate for each unit was then converted to an inferred *PfPR* value using the same model described earlier (Cameron et al). This allowed us to then combine these data with the true *PfPR* survey data that existed, albeit sparsely, in many countries outside Africa.
- (v) The combined *PfPR* survey point data and (pseudo) *PfPR* administrative unit data were then used in a Bayesian spatiotemporal geostatistical model to predict *PfPR* at pixel-year level across all countries. As for the Africa model, *PfPR* was standardized by age and diagnostic type and informed by a wide suite of covariates. An additional mechanism was developed to allow polygon (ie, administrative unit) and point (ie, survey) data to be used jointly to infer the predicted space-time surfaces.
- (vi) As in Africa, the predicted *PfPR* cube was then converted into an equivalent cube of the predicted incidence rate of clinical malaria.

### Total malaria cases by country, year, sex

The pixel-level predictions of clinical incidence rate (both inside and outside Africa) were combined with high-resolution gridded population data to estimate total cases per pixel-year. These were then aggregated to GBD national/subnational locations. For countries endemic for *P. vivax* and *P. falciparum*, we calculated the number of cases due to *P. vivax* applying the fraction of *P. vivax* and *P. falciparum* obtained from WHO and literature review. Total cases estimated in the MAP age bins were then redistributed to standard GBD age bins using the age pattern learned during the mortality/CoD estimation process (discussed in more detail in the GBD 2016 CoD paper).

### Determining YLDs for malaria

As in GBD 2015, we use a two-step process for determining malaria severity. For acute cases, severity splits for mild, moderate, and severe malaria were produced by analysis of MEPS data. These sequelae and their associated disability weights are presented below.

**Table 1. Severity level, lay description, and DW**

| Severity level | Lay description                                                                                     | DW (95% CI)            |
|----------------|-----------------------------------------------------------------------------------------------------|------------------------|
| Mild           | Has a low fever and mild discomfort but no difficulty with daily activities.                        | 0.006<br>(0.002–0.012) |
| Moderate       | Has a fever and aches and feels weak, which causes some difficulty with daily activities.           | 0.051<br>(0.032–0.074) |
| Severe         | Has a high fever and pain and feels very weak, which causes great difficulty with daily activities. | 0.133<br>(0.088–0.19)  |

To determine long-term neurological burden due to malaria, we use the work by Roca-Felter et al. (2008) that examined the number of uncomplicated cases that led to longer-term impairment. Analytically, this means multiplying incidence estimates (described in the section below) for persons under 20 by 0.00029 (0.000077–0.00057). This subset is then combined with excess mortality rates derived from all-cause mortality and standardized mortality ratios for neonatal encephalopathy (NE) in a DisMod model to produce prevalence estimates for all estimation years. Implicit in this process is an assumption that the disability and trend of impairment due to severe malaria follow NE. The subsequent severity splitting follows NE as well. Once the incidence estimation procedures were completed, the results were combined and converted to prevalence by matching each draw with a draw of duration. Consistent with GBD 2015, we use a uniform distribution between 14 and 28 days for duration.

### References

Bhatt S, Weiss DJ, Cameron E, et al. The effect of malaria control on *Plasmodium falciparum* in Africa between 2000 and 2015. *Nature* 2015; 526: 207–11.

Cameron, E., K.E. Battle, S. Bhatt, D.J. Weiss, D. Bisanzio, B. Mappin, U. Dalrymple, S.I. Hay, D.L. Smith, J.T. Griffin, E.A. Wenger, P.A. Eckhoff, T.A. Smith, M.A. Penny, and P.W. Gething. 2015. Defining the relationship between infection prevalence and clinical incidence of *Plasmodium falciparum* malaria. *Nature Communications* 6:8170.

Gething, P.W., D.C. Casey, D.J. Weiss, D. Bisanzio, S. Bhatt, E. Cameron, K.E. Battle, U. Dalrymple, J. Rozier, P.C. Rao, M.J. Kutz, R.M. Barber, C. Huynh, K.A. Shackelford, M.M. Coates, G. Nguyen, M.S. Fraser, R. Kulikoff, H. Wang, M. Naghavi, D.L. Smith, C.J.L. Murray, S.I. Hay, and S.S. Lim. 2016. "Mapping Plasmodium falciparum Mortality in Africa between 1990 and 2015." *New England Journal of Medicine* 375 (25):2435-2445.



# Chagas disease

## Flowchart

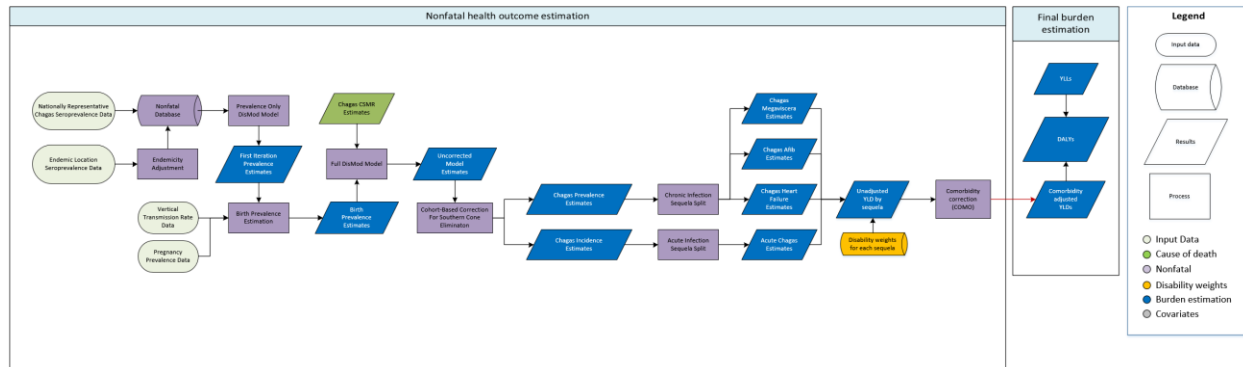

## Case definition

Chagas disease is defined by infection with the protozoa *Trypanosoma cruzi*, which is transmitted by *Triatominae* insect vectors (most common), blood transfusion, organ transplant, and congenital transmission. It includes an acute phase corresponding with the time of infection, and is typically asymptomatic. Chronic infection may be latent (ie, asymptomatic), or result in cardiovascular or digestive sequelae. It includes all ICD-10 codes under the heading B57 (Chagas disease), with codes B57.0-B75.1 corresponding to the acute phase, B57.2 corresponding to chronic cardiovascular sequelae, and B57.3 corresponding to chronic digestive sequelae.

## Input data

### Model inputs

For GBD 2016 estimation, we used seroprevalence data to model Chagas. The table below illustrates the geographic distribution of model input data for the estimation process.

**Table 1. Geographies**

| Level       | Prevalence |
|-------------|------------|
| Data points | 407        |
| Studies     | 56         |
| Locations   | 20         |
| Regions     | 4          |

We also use CSMR estimates in the modeling process, which will be addressed in further detail below.

## Modelling strategy

We modeled Chagas disease using a full DisMod-MR 2.1 Bayesian meta-regression model incorporating seroprevalence data, as above, and CSMR estimates. We assume no remission. We eliminate all new infections, except those via vertical transmission, in Chile and Uruguay for years after the interruption of vector-based transmission (Abad-Franch F, Diotaiuti L, Gurgel-Gonçalves R, Gürtler RE. Certifying the interruption of Chagas disease transmission by native vectors: cui bono? Mem Inst Oswaldo Cruz 2013;108:251–4.; Coura JR. Chagas disease: control, elimination and eradication. Is it possible? Mem Inst Oswaldo Cruz 2013;108:962–7.). For non-endemic countries, we estimate the prevalence of imported chronic infections based on migration. For each non-endemic country, we estimate the total number of people infected with Chagas as the sum of the number of immigrants from each endemic country multiplied by the corresponding prevalence of Chagas in that endemic country.

We estimate five sequelae: symptomatic acute infection from incidence; and megaviscera, heart failure, atrial fibrillation, and chronic asymptomatic infection from prevalence. We assume that 5% of acute infections will be symptomatic (Teixeira AR, Nitz N, Guimaro MC, Gomes C, Santos-Buch CA. Chagas disease. Postgrad Med J 2006;82:788–98.). The proportion of chronic infections resulting in a given sequela varies by sex and age: the prevalence of megaviscera among those infected with Chagas ranges from 0% in children to nearly 10% among older adults (Coura JR, Naranjo MA, Willcox HP. Chagas' disease in the Brazilian Amazon: II. A serological survey. Rev Inst Med Trop São Paulo 1995; 37:103–7.); the prevalence of atrial fibrillation attributable to Chagas ranges from 0% among children to approximately 10% in men over 80 years of age (Ribeiro AL, Marcolino MS, Prineas RJ, Lima-Costa MF. Electrocardiographic abnormalities in elderly Chagas disease patients: 10-year follow-up of the Bambuí Cohort Study of Aging. J Am Heart Assoc 2014;3:e000632.); and the prevalence of heart failure attributable to Chagas among those who are infected ranges from 0% among young children, to a maximum of 23% among men over 80 years of age (Sabino EC, Ribeiro AL, Salemi VM, et al., for the National Heart, Lung, and Blood Institute Retrovirus Epidemiology Donor Study-II (REDS-II), International Component. Ten-year incidence of Chagas cardiomyopathy among asymptomatic Trypanosoma cruzi-seropositive former blood donors. Circulation 2013;127:1105–15.).

### *Severity splits and disability weights*

The table below illustrates the sequelae, lay descriptions, and DWs for Chagas disease.

**Table 2. Sequelae, lay description and DWs**

| Sequelae                                              | Description                                                            | Disability Weight      |
|-------------------------------------------------------|------------------------------------------------------------------------|------------------------|
| Atrial fibrillation and flutter due to Chagas disease | Has periods of rapid and irregular heartbeats and occasional fainting. | 0.224<br>(0.151–0.312) |

|                                                          |                                                                                                                                                                                                                           |                        |
|----------------------------------------------------------|---------------------------------------------------------------------------------------------------------------------------------------------------------------------------------------------------------------------------|------------------------|
| Mild heart failure due to Chagas disease                 | Is short of breath and easily tires with moderate physical activity, such as walking uphill or more than a quarter-mile on level ground. The person feels comfortable at rest or during activities requiring less effort. | 0.041<br>(0.026–0.062) |
| Moderate heart failure due to Chagas disease             | Is short of breath and easily tires with minimal physical activity, such as walking only a short distance. The person feels comfortable at rest but avoids moderate activity.                                             | 0.072<br>(0.047–0.103) |
| Severe heart failure due to Chagas disease               | Is short of breath and feels tired when at rest. The person avoids any physical activity, for fear of worsening the breathing problems.                                                                                   | 0.179<br>(0.122–0.251) |
| Mild chronic digestive disease due to Chagas disease     | Has some pain in the belly that causes nausea but does not interfere with daily activities.                                                                                                                               | 0.011<br>(0.005–0.021) |
| Moderate chronic digestive disease due to Chagas disease | Has pain in the belly and feels nauseated. The person has difficulties with daily activities.                                                                                                                             | 0.114<br>(0.078–0.159) |
| Acute Chagas disease                                     | Has a fever and aches, and feels weak, which causes some difficulty with daily activities.                                                                                                                                | 0.051<br>(0.032–0.074) |
| Asymptomatic Chagas disease                              | Latent Chagas infection (ie, chronic infection with no apparent symptoms)                                                                                                                                                 | NA                     |

### Changes from GBD 2015 to GBD 2016

We have made no substantive changes in the modelling strategy for endemic countries from GBD 2015 to GBD 2016.

# Visceral Leishmaniasis

## Flowchart

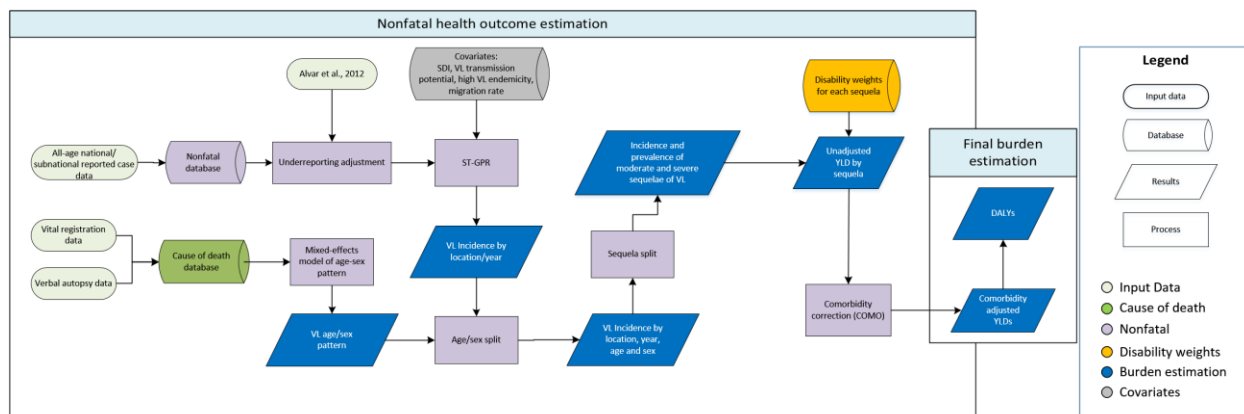

## Input Data and Methodological Summary

### Case Definition

Visceral leishmaniasis (VL) is the most serious manifestation of disease caused by the *Leishmania* parasite, transmitted through the bite of phlebotomine sand flies. Those infected typically present with fever, weight loss, anaemia, leukopenia, thrombocytopenia, and enlargement of the spleen and liver. If left untreated, it can be fatal. Transmission varies by geographic region, as approximately 70 animal species have been identified as potential reservoir hosts of the parasite. The ICD9 code related to visceral leishmaniasis is 085.0, and the ICD10 code is B55.0.

### Input data

No systematic review of literature was done for VL for GBD 2016; however, WHO country profile datasets were updated to include the most recent case reports, and subnational reporting data from India, Brazil and Mexico were added. The table below outlines the number of location-years of reporting data, and the number of locations (countries or subnational units) and GBD world regions represented.

|                   | incidence |
|-------------------|-----------|
| Location-years    | 2,034     |
| Locations         | 188       |
| GBD world regions | 14        |

### Modelling strategy

We inflated VL case reports to account for underreporting, based on underreporting factors that were published by Alvar et al.(1) After adjusting for underreporting, we modelled all-age VL incidence using Space-Time Gaussian Process Regression (ST-GPR), with four covariates: socio-demographic index, leishmaniasis transmission potential (binary), high leishmaniasis endemicity (binary), and migration rate. Given that the vast majority of location-years of case reports are for all ages and both sexes combined, mortality data offered the richest source of data on the age/sex distribution of VL. We modelled age-sex patterns using a mixed effects model of the logit-transformed proportion of cases that occur in each age/sex category, with fixed effects on age (indicator variables for each GBD age group) and sex, and hierarchical random effects region nested within super-region, and random slopes on age category within each level of the geographic hierarchy. Finally, we applied the age/sex patterns from the age-specific model to the total incidence estimates from the all-age ST-GPR model to estimate incidence by location, year, age and sex. Resultant incidence draws are then assumed to have a duration of three months, from which prevalence is calculated. Of those three months, three weeks are assumed to be spent with severe infection, and nine with moderate infection.

### **Changes from GBD 2015 to GBD 2016**

We have substantially revised this model for GBD 2016. Whereas GBD 2015 incidence estimates were derived from a DisMod model, we now estimate all-age incidence via ST-GPR, and age/patterns via a custom mixed-effects model. This approach has the advantage of being able to estimate trends with more detail and accuracy, and of being able to more effectively utilize all-age data, which represent the majority of location-years of incidence data for VL.

# Cutaneous & Mucocutaneous Leishmaniasis

## Flowchart

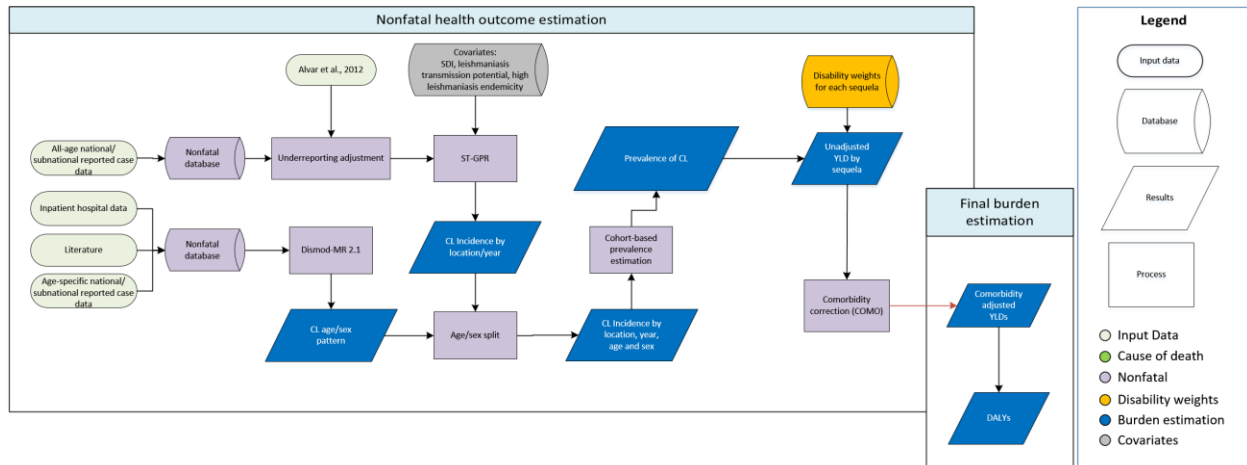

## Input Data and Methodological Summary

### Case Definition

Cutaneous leishmaniasis (CL) is the most common manifestation of disease caused by the *Leishmania* parasite, transmitted through the bite of phlebotomine sand flies. It causes the appearance of skin lesions, often beginning as papules or nodules and developing into ulcers, on parts of the body exposed to the bite of the sand fly. Mucocutaneous leishmaniasis (MCL) is a much more exceptional – and severe – presentation. Primarily isolated to Latin America, MCL infections can result in degradation of the mucous membranes, typically following an ulcerative sore from CL infection. Transmission varies by geographic region, as approximately 70 animal species have been identified as potential reservoir hosts of the parasite.

### Input data

No systematic review of literature was done for Cutaneous and Mucocutaneous Leishmaniasis for GBD 2016; however, WHO country profile datasets were updated to include the most recent case reports, and subnational reporting data from India, Brazil and Mexico were added. The table below outlines the number of location-years of reporting data, and the number of locations (countries or subnational units) and GBD world regions represented.

|                   | incidence |
|-------------------|-----------|
| Location-years    | 1,368     |
| Locations         | 132       |
| GBD world regions | 16        |

### Modelling strategy

We first compiled two CL datasets: 1) a dataset of all-age annual CL case reports, and 2) a dataset of age/sex specific incidence data. Where countries reported cases by age or sex, those age/sex-specific case reports were collapsed to all-age/both sex totals for inclusion the all-age database. All-age/both-sex case reports were then inflated to account for underreporting, based on underreporting factors that were published by Alvar et al.(1)

After adjusting for underreporting, we modelled all-age CL incidence using Space-Time Gaussian Process Regression (ST-GPR). Age-sex patterns were modelled using DisMod-MR and the age/sex-specific dataset. Finally, we applied the age/sex patterns from the age-specific DisModel model to the total incidence estimates from the all-age ST-GPR model to estimate incidence by location, year, age and sex.

We estimated total prevalence as the sum of the prevalence of acute symptoms and long-term sequelae. The prevalence of acute symptoms was calculated as the product of incidence and duration, with duration equal to six-months.(2) We estimated the prevalence of long-term sequelae based on the proportion of cases that would result in lasting facial scars. To do this, we first obtained the average proportion of sores that occur on the face based on a sample-weighted average of the proportion from four studies conducted in North Africa/Middle East (the region with the most data and a fairly high incidence of CL).(3–6) The average proportion of facial sores was 0.476. Of these people, we only assigned long-term to sequelae to those who did not have appropriate access to health care, which we estimated based on a normalized health system access covariate. We multiplied CL incidence times the proportion of people with facial sores (46%), times the proportion of people without health system access in each location-year to obtain incidence of people with long-term sequelae. Assuming no remission or excess mortality, we stream those with long-term sequelae through cohort space to estimate prevalence.

### Changes from GBD 2015 to GBD 2016

We have substantially revised this model for GBD 2016. Whereas GBD 2015 incidence estimates were derived from a DisMod model, we now estimate all-age incidence via ST-GPR, and age/patterns via a DisMod model. This approach has the advantage of being able to estimate trends with more detail and accuracy, and of being able to more effectively utilize all-age data, which represent the majority of location-years of incidence data for CL. Moreover, previous iterations of GBD estimated prevalence from incidence by carrying cases across age groups within a GBD estimation year, rather than carrying cases across cohort space. The previous approach offers a good approximation under relatively stable conditions (i.e. relatively stable incidence and health system access), but it performs poorly where there are non-trivial trends in incidence. We have improved our approach here, and now estimate prevalence in cohort space.

1. Alvar J, Vélez ID, Bern C, Herrero M, Desjeux P, Cano J, et al. Leishmaniasis Worldwide and Global Estimates of Its Incidence. *PLOS ONE*. 2012 May 31;7(5):e35671.
2. Reithinger R, Dujardin J-C, Louzir H, Pirmez C, Alexander B, Brooker S. Cutaneous leishmaniasis. *Lancet Infect Dis*. 2007 Sep 1;7(9):581–96.

3. CLINICAL PICTURE OF CUTANEOUS LEISHMANIASIS IN ISFAHAN, IRAN - MOMENI - 1994 - International Journal of Dermatology - Wiley Online Library [Internet]. [cited 2017 Jul 10]. Available from: <http://onlinelibrary.wiley.com/doi/10.1111/j.1365-4362.1994.tb01039.x/abstract>
4. Gurel MS, Ulukanligil M, Ozbilge H. Cutaneous leishmaniasis in Sanliurfa: epidemiologic and clinical features of the last four years (1997–2000). *Int J Dermatol*. 2002 Jan 1;41(1):32–7.
5. Sharifi I, Fekri AR, Aflatonian MR, Nadim A, Nikian Y, Kamesipour A. Cutaneous leishmaniasis in primary school children in the south-eastern Iranian city of Bam, 1994-95. *Bull World Health Organ*. 1998;76(3):289–93.
6. Mujtaba G, Khalid M. Cutaneous leishmaniasis in Multan, Pakistan. *Int J Dermatol*. 1998 Nov 1;37(11):843–5.



# Human African Trypanosomiasis (HAT)

## Flowchart

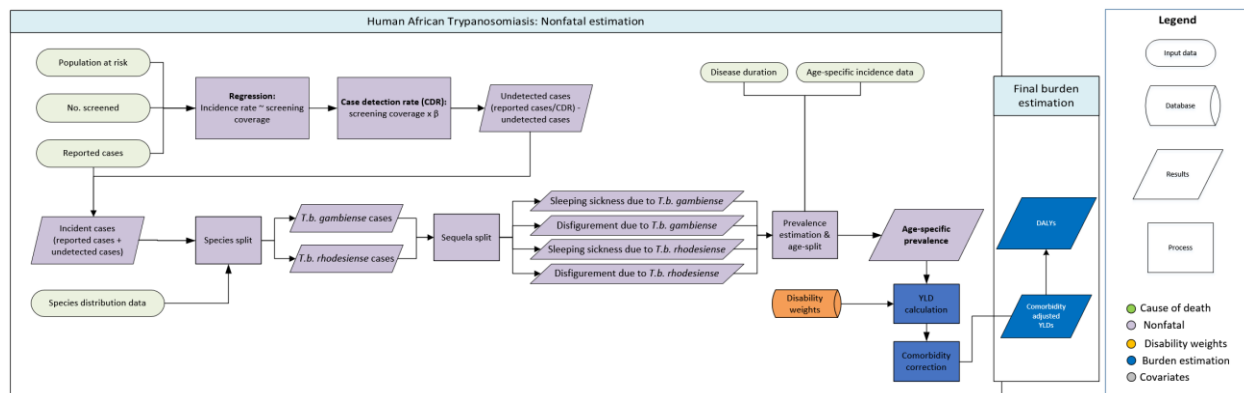

## Input Data & Methodological Summary

### Case Definition

Human African trypanosomiasis (HAT), also known as sleeping sickness, is a vector-borne disease which is transmitted by the bite of the tsetse fly. It is caused by the parasite *Trypanosoma brucei* with two subspecies, namely *T.b. rhodesiense* (makes up less than 5% of total HAT cases) and *T.b. gambiense*. Cases are diagnosed through laboratory methods which rest on finding the parasite in body fluid or tissue by microscopy. In highly endemic or epidemic areas where the likelihood of false positives in serological tests is deemed lower, a seropositive individual is considered affected even in the absence of parasitological confirmation. The ICD-10 codes for HAT are B56.0, B56.1 and B56.9.

### Input data

#### Model inputs

A literature search was done for GBD 2013 and for GBD 2015. The GBD 2015 search was conducted between 1/1/2013 and 8/10/2015, and the number of initial hits was 87. Of these, five sources were extracted for data. The literature search was updated by reviewing all publications from 2016; of the 138 sources reviewed, one additional source was identified to describe the age/sex distribution of HAT infection.

Additional input data used to estimate mortality due to HAT included a) population at risk estimates from GBD 2010 ArcGIS analysis using geocoded case notifications for 2000 to 2009(1) and population Count Grid estimates from Gridded Population of the World 3,(2,3) b) population screened from 1997 to 2004,(4) c) historical data from GBD 2010 on total number of HAT cases reported(1,4,5) and d) cases reported annually to the WHO(6) – for Kenya, a study on cases reported subnationally(7) was used to split the national cases into five counties (HomaBay, Migori, Busia, Bungoma, Kakamega). In addition,

age-specific incidence data from active screening undertaken in the Democratic Republic of Congo(8) and Uganda(9) were used to inform age pattern for deaths.

Data on the number of cases identified through active screening were obtained from a Weekly Epidemiological Record report (4) for *T.b. gambiense* HAT reported from 1997-2004 which reported active case finding data for the following countries: The Gambia, Ghana, Guinea Bissau, Liberia, Niger, Sierra Leone, and Senegal. No active case detection screening coverage data are currently available for *T.b. rhodesiense* HAT-endemic countries.

National case data from 1990-2015 were obtained from the World Health Organization’s official surveillance data (available via the Global Health Observatory).

The table below shows the number of location-years of reporting data, and the number of locations (countries or subnational units) and GBD world regions represented.

|                   |           |
|-------------------|-----------|
|                   | incidence |
| Location-years    | 805       |
| Locations         | 29        |
| GBD world regions | 4         |

Based on available historical data post-1980, the following countries (years) were included in the estimation: Botswana (1983), Ethiopia (1980-1983), Guinea-Bissau (1980-1983, 1985-1987), Rwanda (1980, 1982-1988), and Sierra Leone (1981-1982). Five subnational locations (out of 49) for Kenya were also added in the estimation for GBD 2016.

### Severity splits/sequelae

The basis of the GBD disability weight (DW) survey assessments are lay descriptions of sequelae highlighting major functional consequences and symptoms. The lay descriptions and disability weights for sequelae due to HAT are shown below.

| Sequela                                  | Lay description                                                                                                                                                                                                              | DW (95% CI)            |
|------------------------------------------|------------------------------------------------------------------------------------------------------------------------------------------------------------------------------------------------------------------------------|------------------------|
| Skin disfigurement, level 1              | Has a slight, visible physical deformity that is sometimes sore or itchy. Others notice the deformity, which causes some worry and discomfort.                                                                               | 0.027<br>(0.015–0.042) |
| Motor plus cognitive impairments, severe | Cannot move around without help, and cannot lift or hold objects, get dressed or sit upright. The person also has very low intelligence, speaks few words, and needs constant supervision and help with all daily activities | 0.542 (0.37–0.702)     |

### Modelling strategy

The nonfatal model for HAT is implemented as follows:

1. The incidence of reported HAT cases among the population at risk was calculated as the total number of reported cases divided by the population at risk.
2. To estimate the number of cases that were likely undetected by country and year, a multi-level mixed-effects linear regression of natural log-transformed incidence rate (ratio of reported HAT cases to population at risk) on natural log-transformed screening coverage (ratio of number screened for HAT to population at risk), with country random effects, was performed. Gaps were then filled using exponential interpolation between years and extrapolation from 2015 to 2016 for reported cases. This model generates a beta-coefficient which is used to estimate the case detection rate (see step 3).

For country-years in which no screening coverage data were reported:

- Among countries with data reported, 1997-2004, the proportion of the at risk population screened from 1997 was used retrospectively for the period 1990-1996 and the screening coverage from 2004 was carried forward from 2005-2016.
  - For countries with no screening data reported, the mean screening coverage for the region was used to impute a value over time.
3. Using the mean and variance-covariance matrix from the regression as parameters, a multivariate normal distribution was used to generate 1,000 draws of case detection rate (CDR), given the expected screening coverage. Undetected deaths were then estimated as the difference between the ratio of reported cases to CDR and reported cases (reported cases/CDR – reported cases). Estimates of incidence were obtained by adding the reported cases to the undetected cases.
  4. Total HAT cases were split between *T.b. gambiense* and *T.b. rhodesiense*. We assigned all cases to *T.b. gambiense* for Angola, Benin, Burkina Faso, Cameroon, Central African Republic, Chad, Congo, Cote d'Ivoire, Democratic Republic of the Congo, Equatorial Guinea, Gabon, Ghana, Guinea, Guinea-Bissau, Mali, Nigeria, Sierra Leone, South Sudan, and Togo. We assigned all cases to *T.b. rhodesiense* for Botswana, Ethiopia, Kenya, Malawi, Mozambique, Rwanda, Tanzania, Zambia, and Zimbabwe. Cases in Uganda were split by species based on species-specific case reports.
  5. Assuming the same proportion in treated and untreated cases, the incidence estimates were then split into the two sequelae, skin disfigurement and sleeping disorder. This was done by generating 1,000 draws of the splitting proportion for the sequelae (70%–74% with sleeping disorder) based on a study that reported presence of symptoms at admission of patients in treatment centers [14] – draws were generated from a beta distribution with alpha parameter = 1884 and beta parameter = 649.

6. To compute prevalence of HAT, we generate 1,000 draws of total duration of symptoms in untreated cases with a mean duration of 3 years (1.8 – 4.1) for *T.b. gambiense* and 0.5 years (0.46 – 0.54) for *T.b. rhodesiense*, and an estimated duration of six months for all treated cases (both species) (10,11). Prevalence of treated and untreated cases were summed.
7. For untreated cases, we assumed that half the duration is spent with sleeping disorder (severe motor and cognitive impairment) and disfigurement.(12) Treated (ie, reported) cases are assumed to have been prevalent for 0.5 years, and for the fraction of treated cases that present with sleeping disorder, it was assumed that this is present for half the total duration and that the rest of the duration is spent suffering from disfiguring skin disease. Treated cases that don't present with sleeping disorder were assigned disfigurement for the entire duration.
8. An age-pattern was applied to the all-age incidence estimates using the incidence studies from DRC and Uganda.(8,9,13) The age-pattern in GBD 2016 employed a cubic spline to account for the higher risk of infection among working age adults (as opposed to GBD 2015 in which a step-function at age 20 years was employed to differentiate risk). Without information on sex-specific incidence, we assumed equal incidence rates between both sexes.

### Changes from GBD 2015 to GBD 2016

We have made two changes to our modelling strategy between GBD 2015 to GBD 2016. First, we now split nonfatal cases between *T.b. gambiense* and *T.b. rhodesiense*, and apply different durations to the two. Second, we have improved our method for estimating the age-pattern of cases and now use cubic spline based regression model rather the previous step function.

### References

1. Simarro PP, Cecchi G, Paone M, Franco JR, Diarra A, Ruiz JA, et al. The Atlas of human African trypanosomiasis: a contribution to global mapping of neglected tropical diseases. *Int J Health Geogr.* 2010;9:57.
2. Gridded Population of the World (GPW), Version 3: Population Count Grid. Palisades, NY: Socioeconomic Data and Applications Center (SEDAC); Center for International Earth Science Information Network (CIESIN) at Columbia University; Centro Internacional de Agricultura Tropical (CIAT); 2005.
3. Gridded Population of the World (GPW), Version 3: Population Count Grid, Future Estimates. Palisades, NY: Socioeconomic Data and Applications Center (SEDAC); Center for International Earth Science Information Network (CIESIN) at Columbia University; United Nations Food and Agriculture Programme (FAO); Centro Internacional de Agricultura Tropical (CIAT); 2005.
4. Weekly Epidemiological Record (WER). World Health Organization; 2006 Feb p. 69–80. Report No.: 81, 8.

5. World Health Organization, Department of Communicable Disease Surveillance and Response (CDS). WHO Report on Global Surveillance of Epidemic-prone Infectious Diseases. World Health Organization; 2000.
6. World Health Organization. Human African Trypanosomiasis [Internet]. Global Health Observatory data repository. [cited 2016 Apr 21]. Available from: <http://apps.who.int/gho/data/node.main.A1635?lang=en>
7. Rutto JJ, Karuga JW. Temporal and spatial epidemiology of sleeping sickness and use of geographical information system (GIS) in Kenya. *J Vector Borne Dis*. 2009 Mar;46(1):18–25.
8. Lutumba P, Makieya E, Shaw A, Meheus F, Boelaert M. Human African trypanosomiasis in a rural community, Democratic Republic of Congo. *Emerg Infect Dis*. 2007 Feb;13(2):248–54.
9. Fèvre EM, Odiit M, Coleman PG, Woolhouse MEJ, Welburn SC. Estimating the burden of rhodesiense sleeping sickness during an outbreak in Serere, eastern Uganda. *BMC Public Health*. 2008;8:96.
10. Odiit M, Kansiime F, Enyaru JC. Duration of symptoms and case fatality of sleeping sickness caused by *Trypanosoma brucei rhodesiense* in Tororo, Uganda. *East Afr Med J*. 1997 Dec;74(12):792–5.
11. Checchi F, Filipe JA, Haydon DT, Chandramohan D, Chappuis F. Estimates of the duration of the early and late stage of gambiense sleeping sickness. *BMC Infect Dis*. 2008 Feb 8;8:16.
12. Blum J, Schmid C, Burri C. Clinical aspects of 2541 patients with second stage human African trypanosomiasis. *Acta Trop*. 2006 Jan;97(1):55–64.
13. Kato CD, Nanteza A, Mugasa C, Edyelu A, Matovu E, Alibu VP. Clinical Profiles, Disease Outcome and Co-Morbidities among *T. b. rhodesiense* Sleeping Sickness Patients in Uganda. *PLOS ONE*. 2015 Feb 26;10(2):e0118370.

# Schistosomiasis

## Flowchart

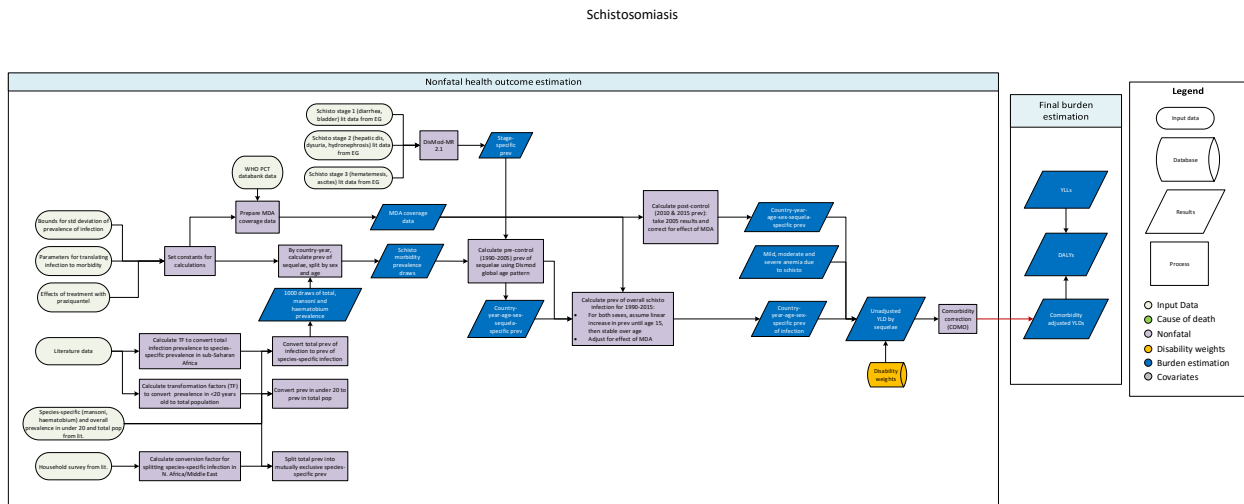

## Case definition

Schistosomiasis, also known as bilharzia or “snail fever,” is a helminth disease caused by infection with five species of the parasite *Schistosoma*, namely, *S. mansoni*, *S. japonicum*, *S. haematobium*, *S. mekongi*, and *S. intercalatum*. It is considered a neglected tropical disease (NTD). The first three species cause the most infection and the last two rarely cause disease. Diagnosis is made by microscopic exam of stool or urine for parasite eggs. For less advanced infections, serologic techniques are used. The ICD-10 codes for schistosomiasis are B65-B65.9.

## Input data

### Model inputs

To model nonfatal outcomes due to schistosomiasis, we conducted a systematic literature review, extracting prevalence data from 1980 to 2016 for the five species of schistosomiasis listed above. The search string used in the systematic review is (schistosom\*[Title/Abstract] OR bilharzia\*[Title/Abstract] OR "snail fever"[Title/Abstract]) AND ("1990"[Date - Publication] : "3000"[Date - Publication]) AND (epidemiolog\* OR inciden\* OR prevalen\* OR seroprevalen\*) NOT (animals[mesh] NOT humans[mesh]). Additionally, we used data compiled by the Global Atlas of Helminth Infections (GAHI), which includes grey literature and unpublished data.

### Population at risk/mass drug administration data

Population at risk estimates and MDA data were taken from the WHO PCT Databank [1].

### Severity splits/sequelae

The table below shows the list of clinical sequelae (including mild, moderate, and severe anaemia) due to schistosomiasis, their lay descriptions, and the associated disease stages and disability weights. Using literature [1], a list of eight possible clinical sequelae and anaemia sequelae were defined (mild infection, mild diarrhoea, haematemesis (vomiting blood), hepatomegaly, ascites (buildup of fluid in the peritoneal cavity), dysuria (painful urination), bladder pathology, hydronephrosis (swelling of kidney due to buildup of urine in the kidney), mild anaemia, moderate anaemia, and severe anaemia).

**Table 2. Clinical sequela, lay descriptions, disease stages, and DWs**

| Clinical sequela  | Lay description                                                                                                                  | Disease stage | Disability weights (DWs) |
|-------------------|----------------------------------------------------------------------------------------------------------------------------------|---------------|--------------------------|
| Mild infection    | has a low fever and mild discomfort , but no difficulty with daily activities                                                    | 1             | 0.006 (0.002–0.012)      |
| Mild diarrhoea    |                                                                                                                                  | 1             | 0.056                    |
| Hepatomegaly      | has some pain in the belly that causes nausea but does not interfere with daily activities                                       | 2             | 0.011 (0.005–0.021)      |
| Dysuria           | has some pain in the belly that causes nausea but does not interfere with daily activities                                       | 2             | 0.011 (0.005–0.021)      |
| Hydronephrosis    | has some pain in the belly that causes nausea but does not interfere with daily activities                                       | 2             | 0.011 (0.005–0.021)      |
| Haematemesis      | vomits blood and feels nauseated                                                                                                 | 3             | 0.325 (0.209–0.463)      |
| Ascites           | has pain in the belly and feels nauseated. The person has difficulties with daily activities                                     | 3             | 0.114 (0.078–0.159)      |
| Bladder pathology | has some pain in the belly that causes nausea but does not interfere with daily activities                                       | 3             | 0.011 (0.005–0.021)      |
| Mild anaemia      | feels slightly tired and weak at times, but this does not interfere with normal daily activities                                 | NA            | 0.004 (0.001–0.008)      |
| Moderate anaemia  | feels moderate fatigue, weakness, and shortness of breath after exercise, making daily activities more difficult                 | NA            | 0.052 (0.034–0.076)      |
| Severe anaemia    | feels very weak, tired, and short of breath, and has problems with activities that require physical effort or deep concentration | NA            | 0.149 (0.101–0.210)      |

## Modelling strategy

The morbidity model for schistosomiasis involved a multi-step process. First, we ran a single-parameter prevalence model in DisMod-MR 2.0 using the prevalence data extracted in the systematic review and from the GAHI database. We make the assumption that all of our data are measured within a population at risk – therefore, the estimates from the DisMod model represent prevalence estimates among the population at risk for schistosomiasis. Additionally, we included the MDA treatment data from the WHO as a country-level covariate in the DisMod model. Second, we then scaled the prevalence estimates to the population at risk estimates from the WHO PCT Databank to get age/sex/location/year all-schistosomiasis prevalence envelopes. 3) We ran a generalized linear model to get species-specific proportional prevalence on data from literature that reported both *S. haematobium* and *S. mansoni* infection, and 4) literature-informed parameters (a, b, c) for translating infection (x) to morbidity (y):  $y =$

$(a + bx^c)/(1 + bx^c) - a$  [2-4]. We used the species-specific conversion factors calculated in step (3) to split the all-schistosomiasis envelope into species-specific schistosomiasis. We then used the parameters determined in step (4) to translate infection into morbidity to get age/sex/year/location-specific prevalence of sequelae. The burden of anemia due to schistosomiasis was estimated (see anaemia documentation for details).

Model evaluation was done by separately assessing the fit of the single-parameter DisMod models and checking the final estimates produced after age-sex splits. Plots of time trends of prevalence across locations and age were used to evaluate the results. In addition, maps of the global distribution of total schistosomiasis prevalence and prevalence of sequelae due to schistosomiasis were also assessed across time.

### Changes from GBD 2015 to GBD 2016

The main change made from GBD 2015 was the systematic review and using extracted data in a DisMod model to estimate prevalence within the population at risk. In addition, newly updated data from the WHO PCT databank were downloaded and used in the model, and geographic restrictions were updated.

### References

1. World Health Organization (WHO). WHO PCT Databank - Schistosomiasis. Geneva, Switzerland: World Health Organization (WHO).
2. van der Werf MJ, de Vlas SJ, Brooker S, et al. Quantification of clinical morbidity associated with schistosome infection in sub-Saharan Africa. *Acta Trop.* 2003;86(2-3):125-39
3. van der Werf MJ, de Vlas SJ, Looman CW, Nagelkerke NJ, Habbema JD, Engels D. Associating community prevalence of *Schistosoma mansoni* infection with prevalence of signs and symptoms. *Acta Trop.* 2002;82(2):127-37
4. van der Werf MJ, de Vlas SJ. Diagnosis of urinary schistosomiasis: A novel approach to compare bladder pathology measured by ultrasound and three methods for hematuria detection. *Am. J. Trop. Med. Hyg.* 2004;82:98-106



# Cysticercosis

## Flowchart

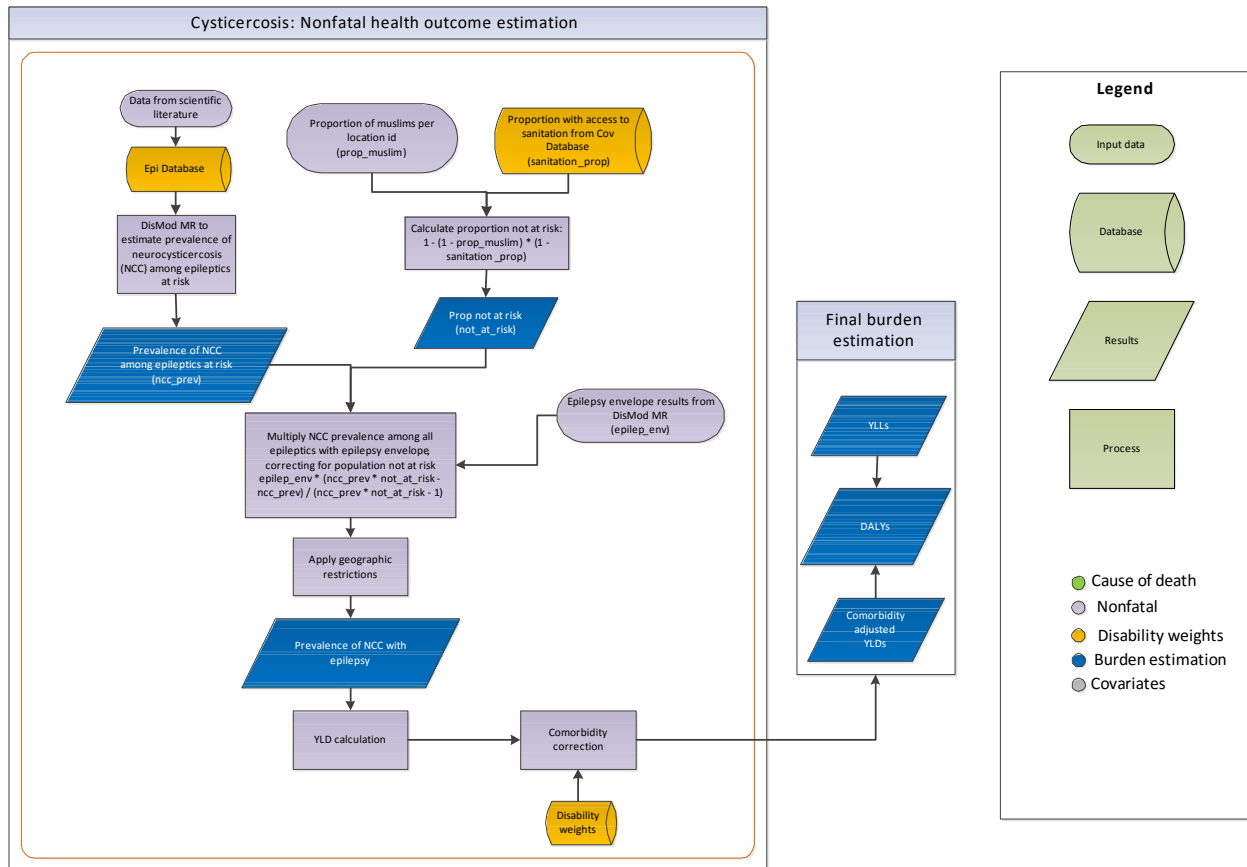

## Input Data & Methodological Summary

### Case Definition

Cysticercosis, or Neurocysticercosis (NCC), is a parasitic disease caused by the pig tapeworm, *Taenia solium*. It is transmitted via ingestion of eggs or gravid proglottids shed by a human or non-human host with an intestinal infection of the same helminth known as Taeniasis. In rare cases, auto-infection is also possible among people with intestinal infections. Diagnosis is made by magnetic resonance imaging (MRI) or computerized tomography (CT) brain scans to identify cysts. The ICD-10 codes for Cysticercosis are B69-B69.9.

## Input data

### Systematic Literature Review

The nonfatal estimation for cysticercosis focused on estimating prevalence of NCC among epileptics at risk as well as the prevalence of NCC with epilepsy. A systematic review of literature was conducted in PubMed for GBD 2015 using the following search string:

```
("cysticercosis"[Title/Abstract] OR "neurocysticercosis"[Title/Abstract] OR "cysticerciasis"[Title/Abstract] OR "Taenia solium"[Title/Abstract]) AND ("1990"[Date – Publication] : "2015"[Date – Publication]) AND (epidemiology OR prevalence)).
```

This yielded 1,038 studies of which 166 were included during the title/abstract screening. Following the full-text screening, 17 studies were included and extracted – studies were excluded because of one or more of the following reasons:

15. study not in epileptics
16. study not population-based
17. study does not have primary data on prevalence of NCC among epileptics at risk
18. study not in humans (some studies were on cysticercosis in pigs)
19. study on comorbidities with NCC (other than epilepsy)
20. study on sub-population, eg, patients with neurological disorders
21. review study

We combined the newly extracted studies with studies extracted during GBD 2013. The table below shows the number of studies finally included, and the number of countries or subnational units and GBD world regions represented.

|                        | prevalence |
|------------------------|------------|
| Studies                | 31         |
| Countries/subnationals | 23         |
| GBD world regions      | 8          |

A study-level covariate was also created in GBD 2015 to indicate the type of diagnosis for each study, ie, definitive or probable. Of the 77 rows of country-year-age-sex data, there were 15 rows with definitive diagnosis and 62 rows with probable diagnosis.

### Covariates

Data was ascertained from the PEW Research Center [1] on the proportion of the population that is Muslim and incorporated as a continuous covariate with a range between 0 and 1.

### Epilepsy Envelope

The modelling process incorporates 100 draws of epilepsy envelope prevalence from the GBD 2016 epilepsy DisMod MR model – details on this modeling process can be found elsewhere.

### Geographic Restrictions

We conducted a literature review to determine the geographic extent of the disease and classify locations based on whether the disease is absent or present in each year. Locations that were

geographically restricted in any given year did not have estimates made for them but could have imported cases attributed to them at a later stage. Of note, we did not attempt a complete systematic review, since a single high-quality source could offer sufficient evidence of presence. Evidence of absence or presence was not available for every location for each year and so assumptions were made for missing years by taking into consideration the epidemiological characteristics of the disease. If evidence indicated disease presence for two non-consecutive years, we assumed presence for all years between the two. If evidence indicated disease absence for two non-consecutive years, we assumed absence for all years between the two. If evidence indicated a change in status (i.e. from absent to present, or present to absent) between two non-consecutive years then we conducted targeted searches to ascertain the relevant year of introduction or elimination for that location. In the cases where presence or absence information was missing for the start or end years of our study interval (1990-2016) without evidence of any introduction or elimination events within the interval, we applied the status of the first and last presence/absence observations respectively to all years between the interval bound and the observation year. For cysticercosis, we performed targeted searches to classify location-years in PubMed and Google Scholar. Our map was populated by 21 peer-reviewed articles and meta-analyses and WHO reports.

### Modelling strategy

DisMod MR was used to model the prevalence of NCC among epileptics at risk. In the model, pigs per capita and religion (binary, >50% Muslim) were used as country-level covariates. In addition, the prevalence of “definitive diagnosis” was transformed to that of “probable and definitive diagnosis” so as to not underestimate overall prevalence.

After running DisMod, we adjusted the fraction of people with epilepsy attributable to cysticercosis in endemic countries for the population at risk based on the proportion of the population without access to sanitation and the proportion of the population that is Muslim. Predicted NCC prevalence among epileptics at risk was calculated such that  $Prevalence = P \times (NM - N) / (NM - 1)$ , where P = prevalence of all-cause epilepsy in total population, N = proportion of NCC among epileptics at risk (non-Muslims without access to sanitation), and M = proportion of population not at risk of contracting NCC. It was assumed that the prevalence of epilepsy due to causes other than NCC is the same regardless of whether a population is at risk or not. It was also assumed that Muslims and non-Muslims have equal access to sanitation.

Geographic restrictions were applied to set prevalence to zero in non-endemic locations.

Model evaluation was done by separately assessing the fit of the DisMod MR model and checking the estimates produced after estimating prevalence of NCC with epilepsy. Plots of time trends of prevalence across locations and age were used to evaluate the results. In addition, maps of the global distribution of prevalence of NCC among epileptics at risk and prevalence of NCC with epilepsy were also assessed across time.

Only minor changes were made to the GBD2015 modeling strategy including slight changes to the model parameters in DisMod MR, a change in covariates, new geographic restrictions and an updating of the proportion of population with Muslim data by filling in subnational locations with national proportions – this was done due to lack of data on this covariate at the subnational level.

### References:

5. "Table: Muslim Population by Country Pew Research Center, Washington, D.C." (July 7, 2017).  
<http://www.pewforum.org/2011/01/27/table-muslim-population-by-country/>

# Cystic Echinococcosis

## Flowchart

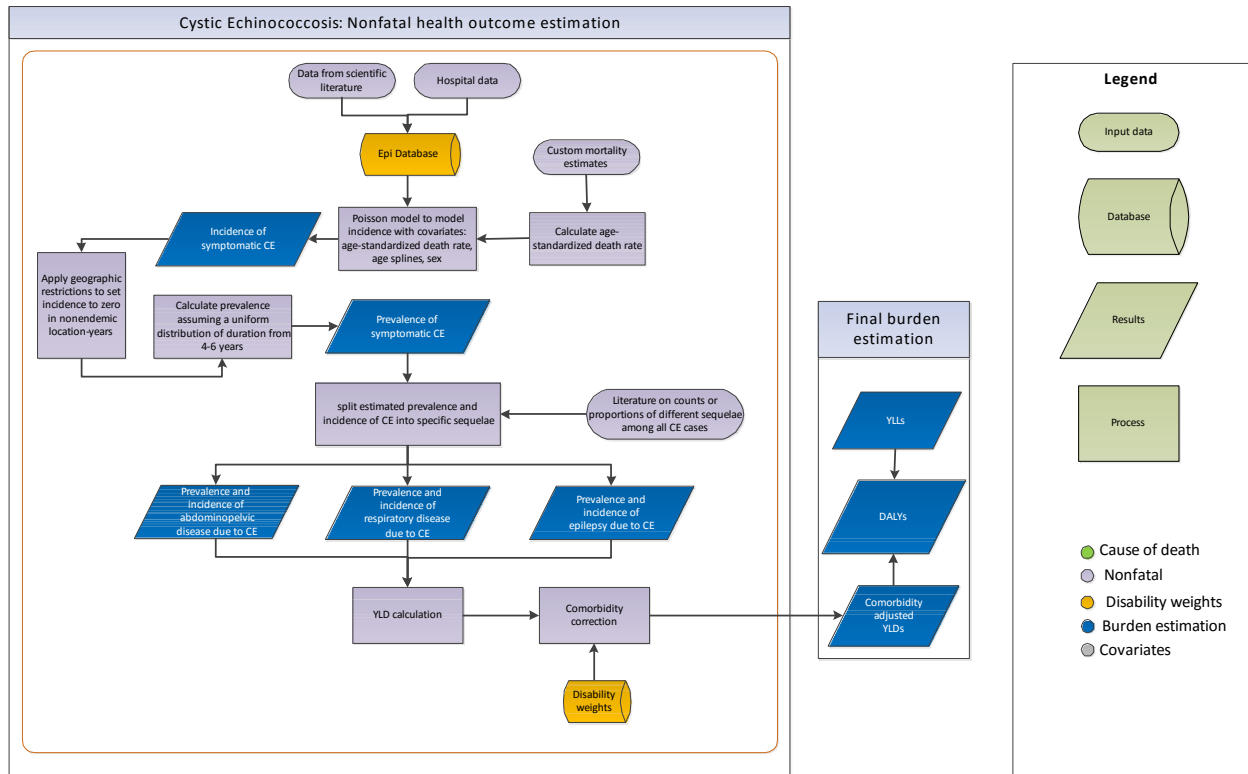

## Input Data & Methodological Summary

### Case definition

Cystic echinococcosis is a parasitic disease caused by infection with the *Echinococcus granulosus* tapeworm. It is a natural parasite of canines, with sheep being the most common intermediate host in the two-stage lifecycle, but can be spread to humans through ingestion of soil, water, or food contaminated with the fecal matter of an infected dog containing infective eggs. Diagnosis is made by clinical findings, imaging, serology, and tissue pathology. The ICD-9 and ICD-10 codes for echinococcosis are 122.0-122.9 and B67-B67.9, respectively.

### Input data

#### Systematic Literature Review

The nonfatal estimation for cystic echinococcosis (CE) focused on estimating incidence and prevalence of CE and its sequelae. A systematic review of literature was conducted in PubMed for GBD 2015 using the following search string:

("echinococcosis"[Title/Abstract] OR "hydatid disease"[Title/Abstract] OR "hydatidosis"[Title/Abstract] OR "echinococcal disease"[Title/Abstract] OR "Echinococcus granulosus infection"[Title/Abstract]) AND ("1990"[Date – Publication] : "2015"[Date – Publication]) AND (epidemiology OR incidence OR prevalence).

This yielded 1,619 studies of which 279 were included during the title/abstract screening. Following the full-text screening, 77 studies (32 incidence, 43 prevalence and 2 both) were included and extracted – studies were excluded because of one or more of the following reasons:

- 22. study not population-based
- 23. study does not have primary data on prevalence and/or incidence
- 24. study not in humans
- 25. study on sub-populations
- 26. review study

Since we were interested in modelling symptomatic CE cases, we only used data on incidence of patients diagnosed by imaging techniques (mainly ultrasonography). Therefore, we excluded prevalence data which were mostly from serological studies.

Data from these extracted studies were combined with data from studies extracted during GBD 2013.

The table below shows the number of studies finally included, and the number of countries or subnational units and GBD world regions represented.

|                        |           |
|------------------------|-----------|
|                        | incidence |
| Studies                | 84        |
| Countries/subnationals | 137       |

### Hospital Data

Hospital data prepared by the GBD team. This data was adjusted to account for multiple hospital episodes of a single case and non-primary diagnoses.

|                        |           |
|------------------------|-----------|
|                        | incidence |
| Data Sources           | 59        |
| Countries/subnationals | 319       |

### Geographic Restrictions

We conducted a literature review to determine the geographic extent of the disease and classify locations based on whether the disease is absent or present in each year. Locations that were geographically restricted in any given year did not have estimates made for them but could have imported cases attributed to them at a later stage. Of note, we did not attempt a complete systematic review, since a single high-quality source could offer sufficient evidence of presence. Evidence of absence or presence was not available for every location for each year and so assumptions were made for missing years by taking into consideration the epidemiological characteristics of the disease. If evidence indicated disease presence for two non-consecutive years, we assumed presence for all years between the two. If evidence indicated disease absence for two non-consecutive years, we assumed

absence for all years between the two. If evidence indicated a change in status (i.e. from absent to present, or present to absent) between two non-consecutive years than we conducted targeted searches to ascertain the relevant year of introduction or elimination for that location. In the cases where presence or absence information was missing for the start or end years of our study interval (1990-2016) without evidence of any introduction or elimination events within the interval, we applied the status of the first and last presence/absence observations respectively to all years between the interval bound and the observation year. For cystic echinococcosis, we performed targeted searches to classify location-years in PubMed and Google Scholar. Our map was populated by 23 peer-reviewed articles and meta-analyses.

### Sequelae due to cystic echinococcosis

The table below shows the sequelae due to echinococcosis and their associated disability weights.

| Sequela                     | Lay description                                                                                                       | DW (95% CI)         |
|-----------------------------|-----------------------------------------------------------------------------------------------------------------------|---------------------|
| Chronic respiratory disease | has cough and shortness of breath after heavy physical activity, but is able to walk long distances and climb stairs. | 0.019 (0.011–0.033) |
| Abdominal problems          | has pain in the belly and feels nauseated. The person has difficulties with daily activities.                         | 0.114 (0.078–0.159) |
| Epilepsy                    | (Combined DW)                                                                                                         | NA                  |

### Modelling strategy

A Poisson model was used to model cystic echinococcosis incidence. Mortality estimates from the custom mortality model were age-standardized and used as a covariate in the model along with age splines and sex. One thousand draws were generated from the predicted mean and predicted standard error.

Geographic restrictions were applied to set incidence to zero in location-years where the disease was not endemic.

These incidence draws were used to calculate prevalence at the draw level by drawing a value of duration of clinical disease from a uniform distribution between four and six years and assuming that each incident case, on average, gets infected in the middle of a five-year age group. In the youngest age groups where individuals are less than one year old, prevalence was equal to have of the incidence. For all individuals over one year old, half of the incidence-years in each age group were assigned to the prevalence in that age bin and the remaining incidence was assigned to the age bin following it.

After producing all-case prevalence draws, a thousand draws of proportions for abdominal, respiratory, and epileptic symptoms among echinococcosis cases adding up to 1 were generated. Uncertainty in the splitting proportions was captured by drawing them from a Dirichlet distribution, informed by published data on cysts localization [1]. On average, the proportions of abdominal, respiratory, and epileptic symptoms due to echinococcosis were 0.8, 0.19, and 0.01, respectively. These proportions were used to split the prevalence and incidence from DisMod into the three sequelae.

Model evaluation was done by separately assessing the fit of the DisMod MR model and checking the estimates produced after estimating incidence and prevalence of sequelae due to cystic echinococcosis.

Plots of time trends of incidence and prevalence across locations and age were used to evaluate the results. In addition, maps of the global distribution of incidence and prevalence were assessed across time.

## References

6. Eckert J, Deplazes P. Biological, Epidemiological, and Clinical Aspects of Echinococcosis, a Zoonosis of Increasing Concern. *Clin Microbiol Rev*, 2004; 17(1): 107-35



# Lymphatic Filariasis

## Flowchart

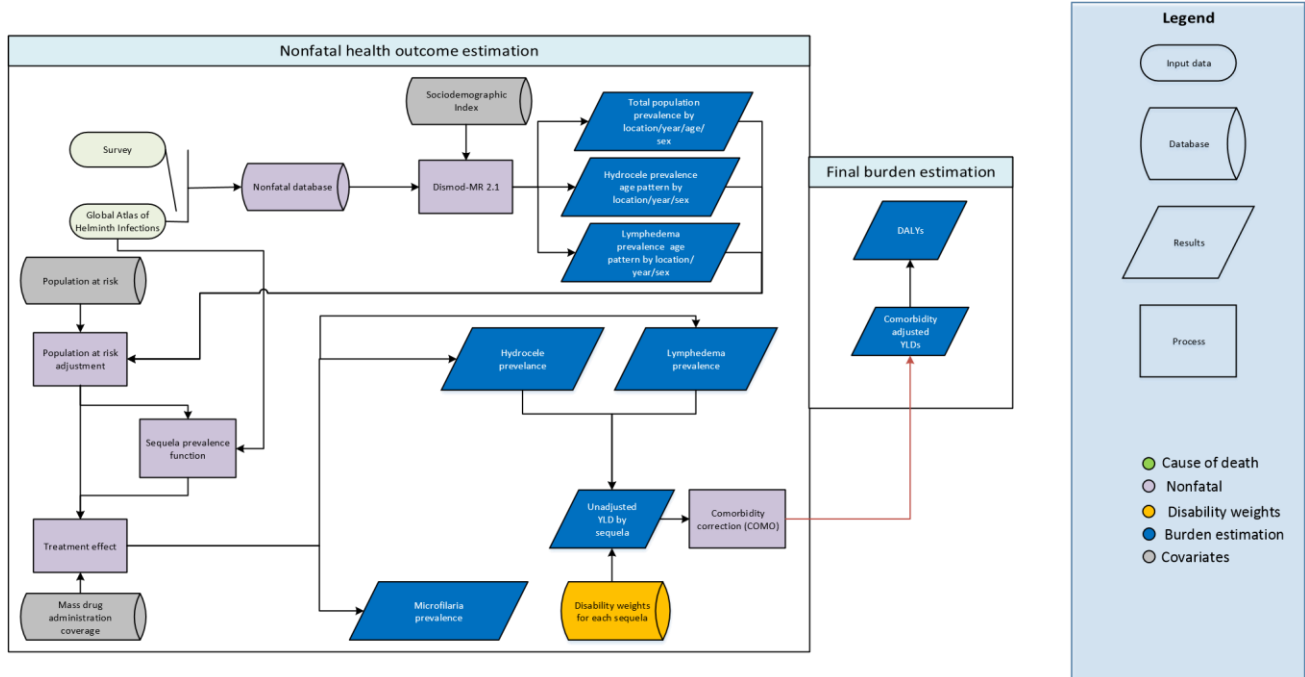

## Input Data and Methodological Summary

### Case Definition

Lymphatic filariasis (LF) is a neglected tropical disease spread in which threadlike nematodes invade the lymphatic system. The worms responsible – *Wuchereria bancrofti*, *Brugia malayi*, and *Brugia timori* – are spread from human to human via mosquitoes. The most prominent clinical manifestations of LF are lymphedema (a swelling of the legs, also known in its more extreme manifestation as elephantiasis) and hydrocele (a collection of fluid in the sac around the testicles).

### Input data

A systematic review of literature for GBD 2016 in the PubMed database was done on October 14, 2016, for prevalence and incidence data using the search (Lymphatic filariasis AND prevalence) OR (Lymphatic filariasis AND (prevalence OR incidence OR "mass drug administration" OR MDA OR coverage)) OR (Lymphedema, hydrocele) OR (Transmission Assessment Survey (TAS)) OR (Lymphatic filariasis AND mapping).

Population at risk and MDA coverage data come from the WHO PCT Databank [1].

## Modelling strategy

Data on prevalence of microfilaria is modelled using DisMod-MR 2.1. Due to the focal nature of lymphatic filariasis, we make the assumption that data collected are from endemic locations unless specifically specified in literature or survey methods. If the data are nationally representative, we adjust the data points by multiplying by the inverse of the proportion of the population at risk. Due to the fact that data is collected in endemic locations or we adjust it so that it is within the population at risk, we then scaled the DisMod-MR 2.1 estimates according to at-risk population in order to attain nationally representative values. We developed a new MDA location-level covariate that is used in the DisMod model based off WHO PCT Databank data, informing prevalence estimates.

For lymphedema and hydrocele, we incorporate survey data from the Global LF Atlas in a non-linear error-in-variables regression that determines the prevalence of lymphedema and hydrocele as functions of microfilaria prevalence, which is then applied to the total microfilaria DisMod model in order to attain an envelope of cases by location-year. Separately, all available prevalence data for these conditions is modeled in DisMod in order to determine an age-sex pattern.

In the estimation of lymphedema and hydrocele prevalence, we perform the same population at-risk correction that is done on microfilaria prevalence. For hydrocele prevalence after treatment, we take the value before MDA rollout in 2000 and reduce that by the same treatment efficacy function described for microfilaria prevalence, using dosage-reduction data specific to hydrocele along with the location-year specific MDA coverage. For lymphedema, we assume no new cases appear among treated individuals. As such, we reduce lymphedema prevalence in post-treatment years in accordance with MDA coverage.

| Sequela                                | Data points | Regions | Countries | Subnational units |
|----------------------------------------|-------------|---------|-----------|-------------------|
| Prevalence of detectable microfilaria  | 1,552       | 10      | 40        | 28                |
| Lymphedema due to lymphatic filariasis | 511         | 10      | 25        | 15                |
| Hydrocele due to lymphatic filariasis  | 265         | 8       | 22        | 12                |

## Changes from GBD 2015 to GBD 2016

We conducted a new literature review, and utilized data from recent years and the MDA covariate to predict the time trend rather than last year's non-linear regression to estimate the reduction of microfilaria as a function of treatments per person.

# Onchocerciasis

## Flowchart

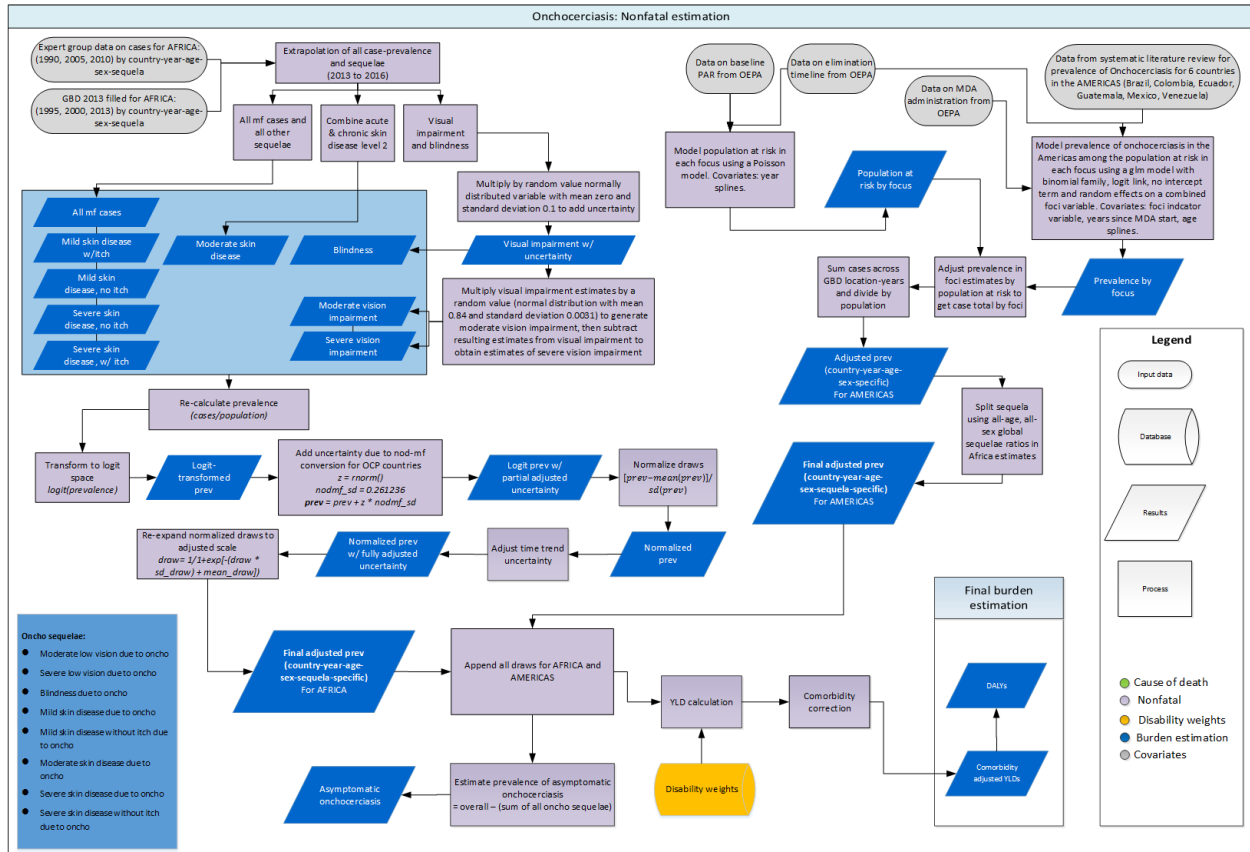

## Input data & methodological summary

### Case definition

Onchocerciasis, also known as river blindness, is a parasitic disease caused by the helminth *Onchocerca volvulus*. It is transmitted via the bite of one of several species of *Simulium* blackflies that have historically bred in fast-moving freshwater rivers and tributaries throughout sub-Saharan Africa, Central America, and South America. Diagnosis can be made by skin snip biopsy to identify larvae, surgical removal of nodules and exam for adult worms, slit lamp exam of anterior part of the eye where larvae or lesions caused by them are visible, and antibody tests (mostly useful to visitors to areas with parasites). The ICD-10 code for onchocerciasis is B73.

### Input data

#### Model inputs

Prevalence data prepared by the GBD 2010 expert group (EG) was used for modelling the nonfatal outcomes resulting from onchocerciasis in Africa. This included 1,000 draws of infection and morbidity

(visual impairment, blindness, and skin conditions) cases with confidence intervals categorized by country, age, and sex for years 1990, 1995, 2000, 2005, and 2010. Details about the materials and methods used by the EG to generate these draws can be found elsewhere [1-5]. These data represented all African countries included in the African Programme for Onchocerciasis Control (APOC) and the Onchocerciasis Control Programme (OCP) for which initial Rapid Epidemiological Mapping of Onchocerciasis (REMO) assessments demonstrated a need for Community-Directed Treatment with Ivermectin (CDTI) (defined as having a prevalence of skin nodules greater than 20%). Four countries – Rwanda, Mozambique, Kenya and Gabon – were designated as hypo-endemic countries after initial REMO assessments and not included due to sparsity of cases and paucity of data. Estimates for Sudan from GBD 2010 were reassigned to South Sudan in GBD 2013 after its independence in 2011 since REMO assessments indicated that the vast majority of cases occurred in that area of the former Sudan. The tables below show the countries included in each program and the number of corresponding GBD locations they represent.

|                                            | <b>APOC Countries</b>                                                                                                                                                                    | <b>OCP Countries</b>                                                                                           |
|--------------------------------------------|------------------------------------------------------------------------------------------------------------------------------------------------------------------------------------------|----------------------------------------------------------------------------------------------------------------|
| <i>Countries included</i>                  | Angola, Burundi, Cameroon, Central African Republic, Chad, Congo, Democratic Republic of Congo, Ethiopia, Equatorial Guinea, Liberia, Malawi, Nigeria, South Sudan, Tanzania, and Uganda | Benin, Burkina Faso, Côte d'Ivoire, Ghana, Guinea Bissau, Guinea, Mali, Niger, Senegal, Sierra Leone, and Togo |
| <i>Hypo-endemic countries not included</i> | Rwanda, Mozambique, Kenya, Gabon, Sudan                                                                                                                                                  |                                                                                                                |
| <i>GBD countries &amp; subnationals</i>    | 15                                                                                                                                                                                       | 11                                                                                                             |
| <i>GBD world regions</i>                   | 3                                                                                                                                                                                        | 1                                                                                                              |

Prevalence data for modelling non-fatal outcomes resulting from onchocerciasis in the Americas was extracted via a systematic literature review. Web of Science, Scopus, and PubMed were searched with the following search strings:

| <b>Database</b>       | <b>Search string</b>                                                                                                                                                                                                                                                                                                                                                                                                                                                                                                                                                                                                                                                                                                                                                                                                                                                                                                                                                                                                                                                                                                                           | <b>Yield</b> |
|-----------------------|------------------------------------------------------------------------------------------------------------------------------------------------------------------------------------------------------------------------------------------------------------------------------------------------------------------------------------------------------------------------------------------------------------------------------------------------------------------------------------------------------------------------------------------------------------------------------------------------------------------------------------------------------------------------------------------------------------------------------------------------------------------------------------------------------------------------------------------------------------------------------------------------------------------------------------------------------------------------------------------------------------------------------------------------------------------------------------------------------------------------------------------------|--------------|
| <i>PubMed</i>         | (oncho*[Title/Abstract] OR "river blindness"[Title/Abstract] OR "O. volvulus"[Title/Abstract] OR "robles disease"[Title/Abstract] OR "blinding filariasis"[Title/Abstract] OR "coast erysipelas"[Title/Abstract] OR "sowda" [Title/Abstract] OR "nodding syndrome"[Title/Abstract]) AND ("1980"[Date – Publication] : "2016"[Date – Publication]) AND (epidemiology[Title/Abstract] OR prevalence[Title/Abstract] OR incidence[Title/Abstract] OR surveillance[Title/Abstract] OR "MDA"[Title/Abstract] OR "Mass Drug Administration"[Title/Abstract] OR "Community-directed treatment with ivermectin"[Title/Abstract] OR "CDTI"[Title/Abstract] OR "mass treatment"[Title/Abstract] OR "multiple ivermectin treatments"[Title/Abstract] OR "monthly doses of ivermectin"[Title/Abstract] OR "large scale treatment"[Title/Abstract] OR REMO[Title/Abstract] OR "Rapid epidemiological mapping of onchocerciasis"[Title/Abstract] OR APOC[Title/Abstract] OR "African Programme for Onchocerciasis Control"[Title/Abstract] OR OCP[Title/Abstract] OR "Onchocerciasis Control Programme"[Title/Abstract]) NOT(Animals[MeSH] NOT Humans[MeSH]) | 986          |
| <i>Web of Science</i> | TS=(oncho* OR "river blindness" OR "O. volvulus" OR "robles disease" OR "blinding filariasis" OR "coast erysipelas" OR sowda OR "nodding syndrome") AND TS=(epidemiology                                                                                                                                                                                                                                                                                                                                                                                                                                                                                                                                                                                                                                                                                                                                                                                                                                                                                                                                                                       | 1,144        |

|        |                                                                                                                                                                                                                                                                                                                                                                                                                                                                                                                                                                                                                                                       |       |
|--------|-------------------------------------------------------------------------------------------------------------------------------------------------------------------------------------------------------------------------------------------------------------------------------------------------------------------------------------------------------------------------------------------------------------------------------------------------------------------------------------------------------------------------------------------------------------------------------------------------------------------------------------------------------|-------|
|        | OR prevalence OR incidence OR surveillance OR MDA OR "Mass Drug Administration" OR "Community-directed treatment with ivermectin" OR CDTI OR "mass treatment" OR "multiple ivermectin treatments" OR "monthly doses of ivermectin" OR "large scale treatment" OR REMO OR "Rapid epidemiological mapping of onchocerciasis" OR APOC OR "African Programme for Onchocerciasis Control" OR OCP OR "Onchocerciasis Control Programme") NOT TS=((Animals NOT Humans))                                                                                                                                                                                      |       |
| SCOPUS | (TITLE-ABS-KEY(oncho* OR "river blindness" OR "O. volvulus" OR "robles disease" OR "blinding filariasis" OR "coast erysipelas")) AND TITLE-ABS-KEY(epidemiology OR prevalence OR incidence OR surveillance OR MDA OR "Mass Drug Administration" OR "Community-directed treatment with ivermectin" OR CDTI OR "mass treatment" OR "multiple ivermectin treatments" OR "monthly doses of ivermectin" OR "large scale treatment" OR REMO OR "Rapid epidemiological mapping of onchocerciasis" OR APOC OR "African Programme for Onchocerciasis Control" OR OCP OR "Onchocerciasis Control Programme") AND NOT KEY(Animals NOT Humans) AND PUBYEAR > 1979 | 2,000 |

This yielded 4,130 results in total which was reduced to 2,502 after removing duplicates. The title and abstracts were screened for inclusion or exclusion with the following criteria:

**Exclusion Criteria:**

- Pre-1980
- Non-original source
- Non-representative population
  - Vulnerable populations (eg, slum-dwellers, prisoners, orphans, high-risk jobs, etc.)
  - Hospital-based samples (including saved stool samples)
  - Non-native peoples (eg, migrants, expats, nomads, etc.)
  - Immunosuppression/illness (eg, HIV, TB, CA, RA, asthma, malaria, handicap, etc.)
- Non-human population
- Does not meet case definition
- Case-control study

Sixty-one articles were identified for full text screening and extraction from the historically endemic American countries: Guatemala, Brazil, Ecuador, Venezuela, Mexico, and Colombia.

*Severity splits/sequelae*

The table below shows the list of common clinical manifestations of onchocerciasis and the sequelae to which they have been mapped along with the lay description and the associated disability weight (DW) of each sequela.

| Clinical manifestation                                                           | Sequela name               | Lay description                                                                                 | DW                     |
|----------------------------------------------------------------------------------|----------------------------|-------------------------------------------------------------------------------------------------|------------------------|
| Uveitis; Punctate keratitis; Optic neuritis; Torpid Iritis; Onchochorioretinitis | Moderate vision impairment | has vision problems that make it difficult to recognize faces or objects across a room          | 0.031<br>(0.019–0.049) |
| Sclerosing keratitis; Optic neuropathy; Optic atrophy;                           | Severe vision impairment   | has severe vision loss, which causes difficulty in daily activities, some emotional impact (for | 0.184<br>(0.125–0.258) |

|                                                                                               |                                  |                                                                                                                                                                              |                        |
|-----------------------------------------------------------------------------------------------|----------------------------------|------------------------------------------------------------------------------------------------------------------------------------------------------------------------------|------------------------|
| Choroidoretinopathy;<br>Cataracts                                                             |                                  | example worry), and some difficulty going outside the home without assistance                                                                                                |                        |
| Blindness                                                                                     | Blindness                        | is completely blind, which causes great difficulty in some daily activities, worry and anxiety, and great difficulty going outside the home without assistance               | 0.187<br>(0.124–0.260) |
| Acute papular onchodermatitis;<br>Onchocercomata (subcutaneous nodules)                       | Mild skin disease                | has a slight, visible physical deformity that is sometimes sore or itchy. Others notice the deformity, which causes some worry and discomfort                                | 0.027<br>(0.015–0.042) |
| Chronic papular onchodermatitis;<br>Lichenified onchodermatitis (“sowda”);<br>Lymphadenopathy | Mild skin disease without itch   | has a slight, visible physical deformity that others notice, which causes some worry and discomfort                                                                          | 0.011<br>(0.005–0.021) |
| Skin atrophy;<br>Depigmentation (“leopard skin”)                                              | Moderate skin disease            | has a visible physical deformity that is sore and itchy. Other people stare and comment, which causes the person to worry. The person has trouble sleeping and concentrating | 0.188<br>(0.124–0.267) |
| Hanging groin;<br>Lymphoedema                                                                 | Severe skin disease without itch | has an obvious physical deformity that makes others uncomfortable, which causes the person to avoid social contact, feel worried, sleep poorly, and think about suicide      | 0.405<br>(0.275–0.546) |
|                                                                                               | Asymptomatic onchocerciasis      | NA                                                                                                                                                                           | NA                     |

## Modelling strategy

The nonfatal modelling for onchocerciasis included four major steps. In the first step, GBD 2010 prevalence was extrapolated to obtain GBD 2016 estimates. Acute skin disease level 2 and chronic skin disease level 2 were summed to create the moderate skin disease sequela. Uncertainty was quantified and provided by the EG for all estimates except those of visual impairment and blindness. In these cases, each of the OCP draws the number of cases were multiplied by a random value (the exponent of a normally distributed variable with mean zero and standard deviation 0.1) in order to add uncertainty. Within each draw, the same randomly drawn value was applied to all country-year-age-sex estimates. Visual impairment was then split into moderate and severe vision impairment by first multiplying the visual impairment estimates by a random value (from a normal distribution with mean 0.84 and standard deviation 0.0031) to generate moderate vision impairment, and then subtracting the resulting estimates from visual impairment to obtain estimates of severe vision impairment. Prevalence of sequelae was calculated by dividing the cases by the population.

The second step in modelling morbidity due to onchocerciasis was the adjustment of uncertainty in the conversion of nodule prevalence to microfilaria (mf) prevalence and in the effects of mass drug administration (MDA). To adjust for uncertainty in translation of nodule prevalence to mf prevalence,

the final OCP draws from the first step were logit transformed and uncertainty was added from a random value drawn from a normal distribution to the transformed estimates. The resulting estimates were then normalized and scaled using estimates published elsewhere [1]. To adjust for uncertainty due to MDA, the year when MDA with Ivermectin started was set according to the table below.

| Country                                                                         | MDA start year |
|---------------------------------------------------------------------------------|----------------|
| Angola, Burundi, South Sudan                                                    | 2005           |
| Congo, Ethiopia, DRC                                                            | 2001           |
| Cameroon, Central African Republic, Equatorial Guinea, Liberia, Nigeria, Uganda | 1999           |
| Chad, Niger, Tanzania                                                           | 1998           |
| Malawi                                                                          | 1997           |
| All others                                                                      | 1990           |

The uncertainty in the time trend was then multiplied by the normalized prevalence estimates and the final prevalence was obtained by re-expanding the scaled normalized draws and adjusting the scale back from logit scale.

In the third step, prevalence of onchocerciasis in the Americas was modelled separately and combined with the Africa model. Onchocerciasis is known to have occurred in six countries of Central and Southern America: Mexico, Guatemala, Colombia, Ecuador, Brazil and Venezuela. The epidemiology of onchocerciasis is very different in these countries than in Africa because it has only occurred in relatively small, well defined foci. These foci have been mapped and thoroughly monitored since the early 1990s with the formation of the Onchocerciasis Elimination Program of the Americas (OEPA) and all of the prevalence surveys conducted are only representative of these areas. Additionally, certain foci are geographically continuous across national boundaries. Therefore, we modelled onchocerciasis in these countries at the foci level among the population at risk in each foci instead of at the national level. Population at risk for each focus was modelled using data from OEPA on baseline population at risk [6] and data from OEPA and peer reviewed studies on dates of elimination in each focus [6-19]. This was done with a Poisson model using year splines as a covariate and 1,000 draws of the population at risk were drawn from the predicted mean and standard error. The prevalence of disease among the population at risk was subsequently modeled using a generalized linear model with a binomial family, logit link, no intercept term and random effects on a combined-foci variable created by grouping foci by geographic contiguity and nearness when data was sparse. Covariates included an indicator term on the foci, the number of years since MDA began and splines on age. One thousand draws of prevalence were calculated from one thousand draws of beta values from the variance-covariance matrix and adjusted by the estimated population at risk in each foci-year to determine the number of cases. The cases were then summed by GBD location and year and divided by national population to find the national prevalence. While the model predicted case values very close to zero in the countries where elimination has occurred, these were overwritten to zero values for all years after certified elimination. The ratio of global all-age, all-sex prevalence of each sequelae to the all-cases prevalence from the Africa estimates was applied to all-cases prevalence from the Americas to calculate prevalence of each sequelae.

Lastly, to estimate the prevalence of asymptomatic onchocerciasis, the prevalence of morbidity (vision loss, blindness and skin conditions) was subtracted from the overall onchocerciasis prevalence.

Moderate vision impairment, severe vision impairment and blindness estimates were each multiplied by a factor of 8/33 before subtraction to account for cases that have concurring symptoms.

Model evaluation was done by separately assessing plots of time trends of prevalence across locations and age for each sequela. In addition, maps of the global distribution of total onchocerciasis prevalence and prevalence of sequelae due to onchocerciasis were also assessed across time.

## Changes from GBD 2015 to GBD 2016

Prevalence of onchocerciasis in foci in the Americas was not previously included but is now being modelled.

## References

- Zouré HG, Noma M, Tekle AH, Amazigo UV, Diggle PJ, Giorgi E, Remme JH. The geographic distribution of onchocerciasis in the 20 participating countries of the African Programme for Onchocerciasis Control: (2) pre-control endemicity levels and estimated number infected. *Parasites & Vectors*. 2014. 7-326.
- Coffeng L, Stolk W, Hoerauf A, Habbema D, Bakker R, Hopkins A, de Vlas S. Elimination of African onchocerciasis: modeling the impact of increasing the frequency of ivermectin mass treatment. *PLoS One*. 2014. 9(12):e115886.
- Coffeng LE, Stolk WA, Zouré HG, Veerman JL, Agblewonu KB, Murdoch ME, Noma M, Fobi G, Richardus JH, Bundy DA, Habbema D, de Vlas SJ, Amazigo UV. African Programme For Onchocerciasis Control 1995-2015: model-estimated health impact and cost. *PLoS Negl Trop Dis*. 2013; 7(1): e2032.
- Murdoch ME, Asuzu MC, Hagan M, Makunde WH, Ngoumou P, Ogbuagu KF, Okello D, Ozoh G, Remme J. Onchocerciasis: the clinical and epidemiological burden of skin disease in Africa. *Ann Trop Med Parasitol*. 2002; 96(3): 283-296.
- Brieger WR, Awedoba AK, Eneanya CI, Hagan M, Ogbuagu KF, Okello DO, Ososanya OO, Ovuga EB, Noma M, Kale OO, Burnham GM, Remme JH. The effects of ivermectin on onchocercal skin disease and severe itching: results of a multicentre trial. *Trop Med Int Health*. 1998; 3(12): 951-61.
- México. <http://www.oepa.net/Mexico.htm> (accessed July 7, 2017).
- Guatemala. <http://www.oepa.net/guatemala.html> (accessed July 7, 2017).
- Venezuela. <http://www.oepa.net/venezuela.html> (accessed July 7, 2017).
- Colombia. <http://www.oepa.net/colombia.html> (accessed July 7, 2017).
- Ecuador. <http://www.oepa.net/ecuador.html> (accessed July 7, 2017).
- Rodríguez-Pérez MA, Unnasch TR, Domínguez-Vázquez A, *et al*. Lack of Active *Onchocerca volvulus* Transmission in the Northern Chiapas Focus of Mexico. *The American Journal of Tropical Medicine and Hygiene* 2010; **83**: 15–20.
- Rodríguez-Pérez MA, Domínguez-Vázquez A, Unnasch TR, *et al*. Interruption of Transmission of *Onchocerca volvulus* in the Southern Chiapas Focus, México. *PLOS Neglected Tropical Diseases* 2013; **7**: e2133.
- Rodríguez-Pérez MA, Unnasch TR, Domínguez-Vázquez A, *et al*. Interruption of Transmission of *Onchocerca volvulus* in the Oaxaca Focus, Mexico. *The American Journal of Tropical Medicine and Hygiene* 2010; **83**: 21–7.



20. Cruz-Ortiz N, Gonzalez RJ, Lindblade KA, *et al.* Elimination of *Onchocerca volvulus* Transmission in the Huehuetenango Focus of Guatemala. *Journal of Parasitology Research*. 2012. <https://www.hindawi.com/journals/jpr/2012/638429/abs/> (accessed July 7, 2017).
21. Jr FR, Rizzo N, Espinoza CED, *et al.* One Hundred Years After Its Discovery in Guatemala by Rodolfo Robles, *Onchocerca volvulus* Transmission Has Been Eliminated from the Central Endemic Zone. *The American Journal of Tropical Medicine and Hygiene* 2015; **93**: 1295–304.
22. Gonzalez RJ, Cruz-Ortiz N, Rizzo N, *et al.* Successful interruption of transmission of *Onchocerca volvulus* in the Escuintla-Guatemala focus, Guatemala. *PLoS Negl Trop Dis* 2009; **3**: e404.
23. Lindblade KA, Arana B, Zea-Flores G, *et al.* Elimination of *Onchocercia volvulus* transmission in the Santa Rosa focus of Guatemala. *Am J Trop Med Hyg* 2007; **77**: 334–41.
24. Convit J, Schuler H, Borges R, *et al.* Interruption of *Onchocerca volvulus* transmission in Northern Venezuela. *Parasites & Vectors* 2013; **6**: 289.
25. WHO | WHO declares Ecuador free of onchocerciasis (river blindness). WHO. [http://www.who.int/neglected\\_diseases/ecuador\\_free\\_from\\_onchocerciasis/en/](http://www.who.int/neglected_diseases/ecuador_free_from_onchocerciasis/en/) (accessed July 7, 2017).

# Dengue

## Flowchart

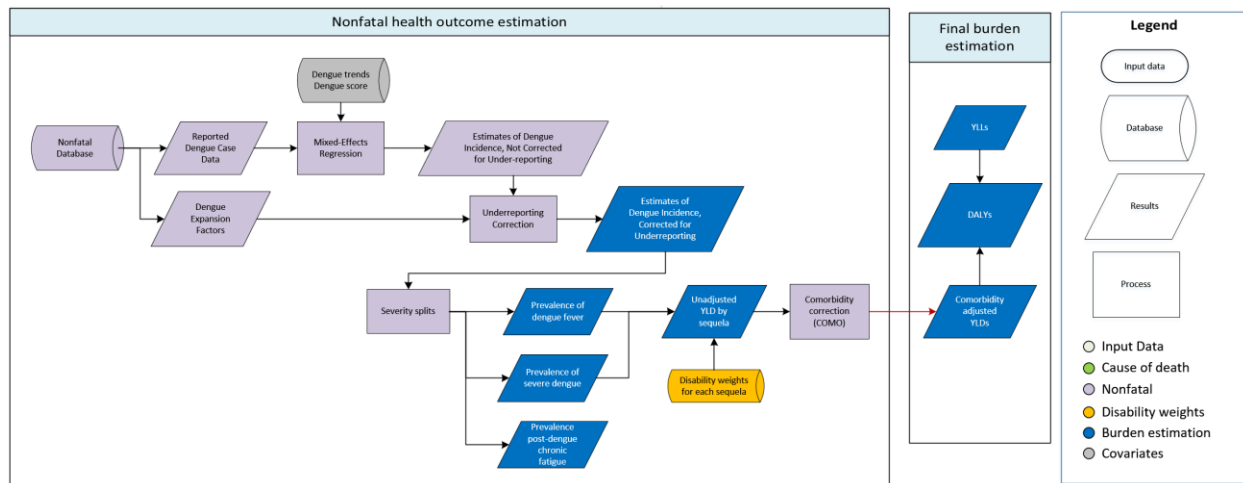

## Case definition

Dengue is mosquito-borne viral infection that causes febrile illness and, in severe cases, jaundice, hemorrhage, and death. It includes all ICD-10 codes under the heading A90 (Dengue fever [classical dengue]) and A91 (Dengue hemorrhagic fever).

## Input data

### Model inputs

For GBD 2016, we modelled dengue incidence based on officially reported cases. The table below illustrates the geographic distribution of data points used in our analysis.

**Table 1. Geographies**

| Level       | Incidence |
|-------------|-----------|
| Data points | 2,920     |
| Studies     | 70        |
| Locations   | 201       |
| Regions     | 15        |

While no systematic update was conducted, we did incorporate new expansion factor data that were provided by collaborators and have updated to the latest available case reports for GBD 2016.

## Modelling strategy

The methods used to model dengue incidence remain unchanged from GBD 2015, and are an improved variant of the methods used for GBD 2013 that were described by Stanaway et al. Briefly, we derive two dengue-specific covariates: first a variable to define the expected spatial distribution of the disease based on principal components analysis of dengue CSMR estimates and dengue transmission probability and, second, a variable to define the country-specific trends, based on a mixed-effects model of reported cases. We then estimate a mixed-effects negative binomial model with number of reported cases as the dependent variable, fixed effects on the aforementioned spatial and temporal covariates, and random effects on location. These random effects are assumed to correspond to deviations in reporting completeness and, calibrating against published expansion factor data (ie, estimates of the degree of underreporting), they are inflated to adjust for underreporting estimates. The resulting incidence estimates are split into moderate (94.5%) and severe (5.5%) sequelae, based on the proportion of reported cases that were severe. We assume that 8.4% of symptomatic infections will produce post-acute chronic fatigue lasting an average of six months (Teixeira L de AS, Lopes JSM, Martins AG da C, Campos FAB, Miranzi S de SC, Nascentes GAN. Persistence of dengue symptoms in patients in Uberaba, Minas Gerais State, Brazil. *Cad Saúde Pública* 2010; **26**: 624–30.).

### *Severity splits and disability weights*

**Table 2. Sequelae, lay descriptions, and DWs**

| Sequela      | Lay description                                                                                      | Disability Weight (DW) |
|--------------|------------------------------------------------------------------------------------------------------|------------------------|
| Moderate     | Has a fever and aches, and feels weak, which causes some difficulty with daily activities.           | 0.051<br>(0.032–0.074) |
| Severe       | Has a high fever and pain, and feels very weak, which causes great difficulty with daily activities. | 0.133<br>(0.088–0.19)  |
| Asymptomatic | Infection with no apparent illness.                                                                  | NA                     |

## Changes from GBD 2015 to GBD 2016

We have made no substantive changes in the modelling strategy from GBD 2015 to GBD 2016.

## References

1. Stanaway JD, Shepard DS, Undurraga EA, Halasa YA, Coffeng LE, Brady OJ, et al. The global burden of dengue: an analysis from the Global Burden of Disease Study 2013. *The Lancet Infectious Diseases* [Internet]. 2016 Feb [cited 2016 May 23].
2. Bhatt S, Gething PW, Brady OJ, Messina JP, Farlow AW, Moyes CL, et al. The global distribution and burden of dengue. *Nature*. 2013 Apr 25;496(7446):504–7.

# Yellow Fever

## Flowchart

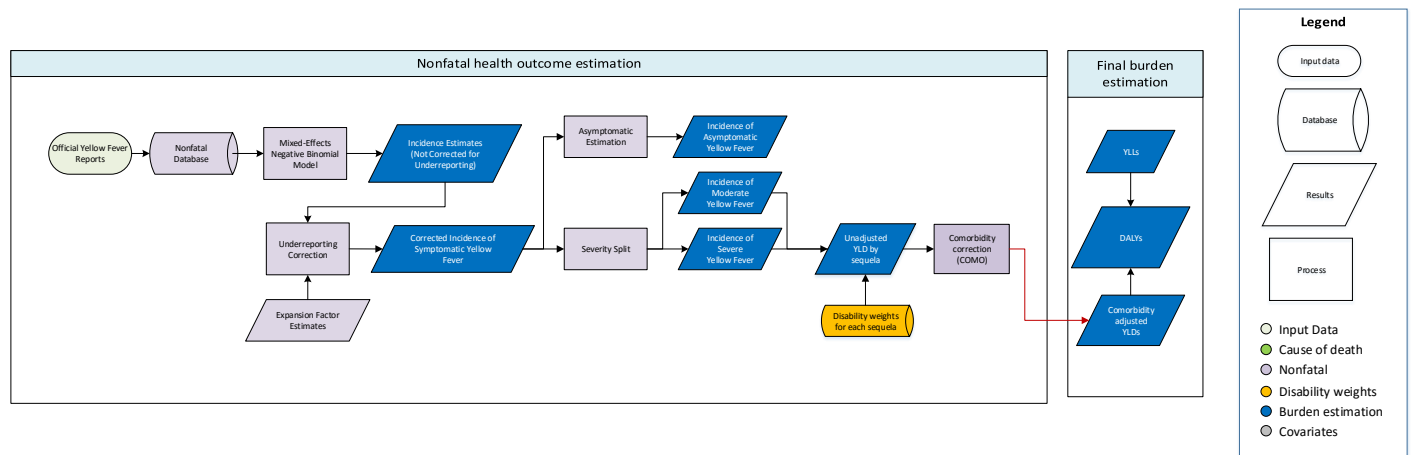

## Case definition

Yellow fever is mosquito-borne viral infection that causes febrile illness and, in severe cases, jaundice, haemorrhage, and death. It is considered a neglected tropical disease (NTD). It includes all ICD-10 codes under the heading A95 (yellow fever).

## Input data

### Model inputs

Case data for the yellow fever estimate process comes from official case reports filed with the World Health Organization. The table below shows the distribution of said data geographically for the GBD 2016 estimation process.

**Table 1. Data spread**

| Level       | Incidence |
|-------------|-----------|
| Data points | 909       |
| Studies     | 19        |
| Locations   | 47        |
| Regions     | 9         |

We have updated to the latest available case reports for GBD 2016.

### Severity splits

Yellow fever is split into three levels of severity: moderate (33% [13–52]), severe (12% [5–26]), and asymptomatic (55% [37–74]). The table below illustrates this breakdown.

**Table 2. Sequela, description, and disability weight (DW)**

| Sequela      | Description                                                                                          | Disability weight (DW) |
|--------------|------------------------------------------------------------------------------------------------------|------------------------|
| Moderate     | Has a fever and aches, and feels weak, which causes some difficulty with daily activities.           | 0.051<br>(0.032–0.074) |
| Severe       | Has a high fever and pain, and feels very weak, which causes great difficulty with daily activities. | 0.133<br>(0.088–0.19)  |
| Asymptomatic | Infection with no apparent illness.                                                                  | NA                     |

## Modelling strategy

We modelled reported cases of yellow fever using a mixed-effects negative binomial model, with fixed effects for year and random effects for super-region, region, and country. We assume that yellow fever cases are underreported, and that this underreporting mirrors that for dengue (a disease for which we have better data on underreporting). With that, we estimate symptomatic cases as the product of our base case estimates and dengue expansion factors (ie, the factor by which you must multiply reported cases to derive true cases). Based on published estimates from Johansson et al (2014), we assume that 27% of symptomatic cases will be severe.

## Changes from GBD 2015 to GBD 2016

We have made no substantive changes in the modelling strategy for endemic countries from GBD 2015 to GBD 2016.

# Rabies

## Flowchart

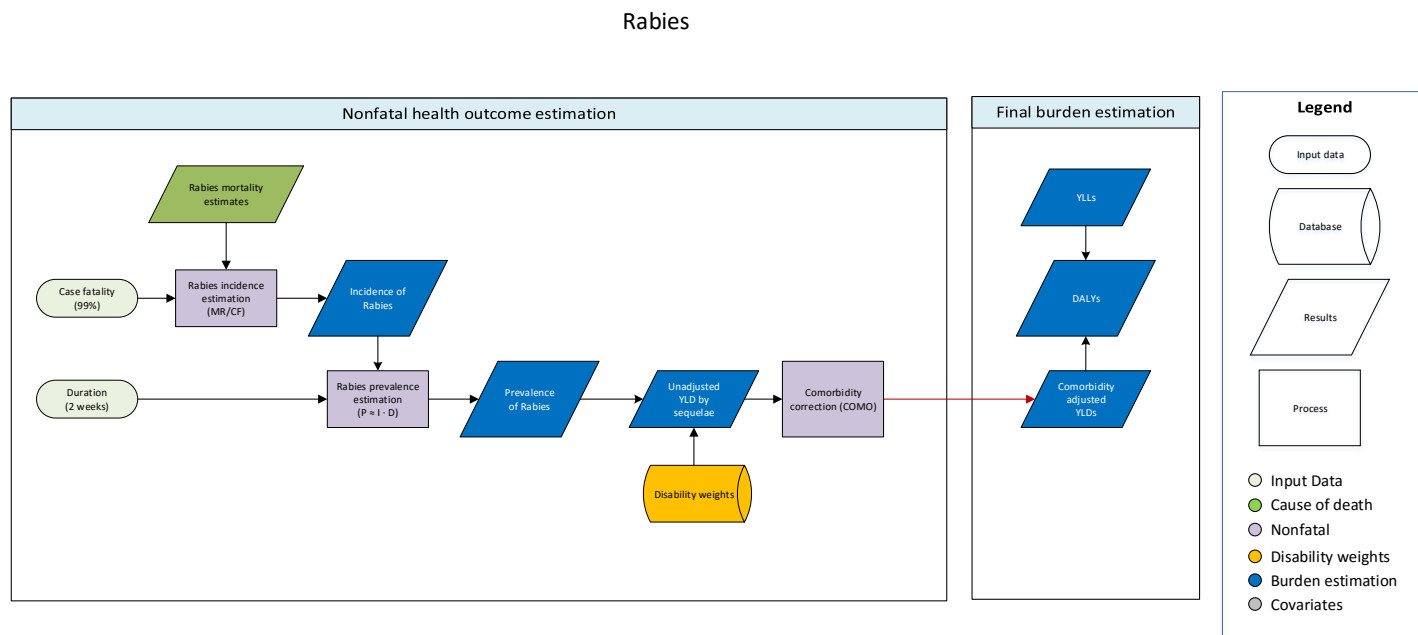

## Input data and methodological summary

### Case definition

Rabies is a fatal viral infection, transmitted by animal bites. Without prophylactic vaccination the disease is almost universally fatal. The disease has a long incubation period (1-3 months), and early intervention with prophylactic vaccination is nearly 100% effective in preventing symptomatic disease. It is considered a neglected tropical disease (NTD). We model symptomatic infections, not including those infections in which intervention prevented the onset of symptomatic disease, corresponding to the ICD10 code A82.

### Input data

#### *Model inputs*

As we derive our estimate of cases from our estimate of deaths, no incidence data are used in the model. For GBD 2016, we modelled rabies mortality using all available data in the cause of death database. Data points were outliered if they reported an improbable number of rabies deaths (eg, zero rabies deaths in a hyperendemic country) or if their inclusion in the model yielded distorted trends. In some cases multiple data sources for the same location differed dramatically both in their quality and reported rabies mortality (eg, a verbal autopsy and vital registration source). In these cases the lower-quality data source was outliered.

## Modelling strategy

We derive estimates of the number of symptomatic rabies infections (ie, those not averted through prophylactic vaccination) based on rabies mortality estimates, assuming 99% case fatality. All cases are assumed to be severe.

We modelled rabies mortality using a two-model hybrid approach 1) a global CODEm model of all locations, using all data in the CoD database; and 2) a CODEm model restricted to data-rich countries.

### *Sequela description and DW*

There is only one sequela and associated disability weight for rabies, which is severe. The lay description is included in the table below.

**Table 2. Sequela, description, and DW**

| Sequela | Description                                                                                          | Disability Weight (95% CI) |
|---------|------------------------------------------------------------------------------------------------------|----------------------------|
| Severe  | Has a high fever and pain, and feels very weak, which causes great difficulty with daily activities. | 0.133<br>(0.088–0.19)      |

## Changes from GBD 2015 to GBD 2016

We have made no substantive changes in the modelling strategy for rabies from GBD 2015.

# Ascariasis

## Flowchart

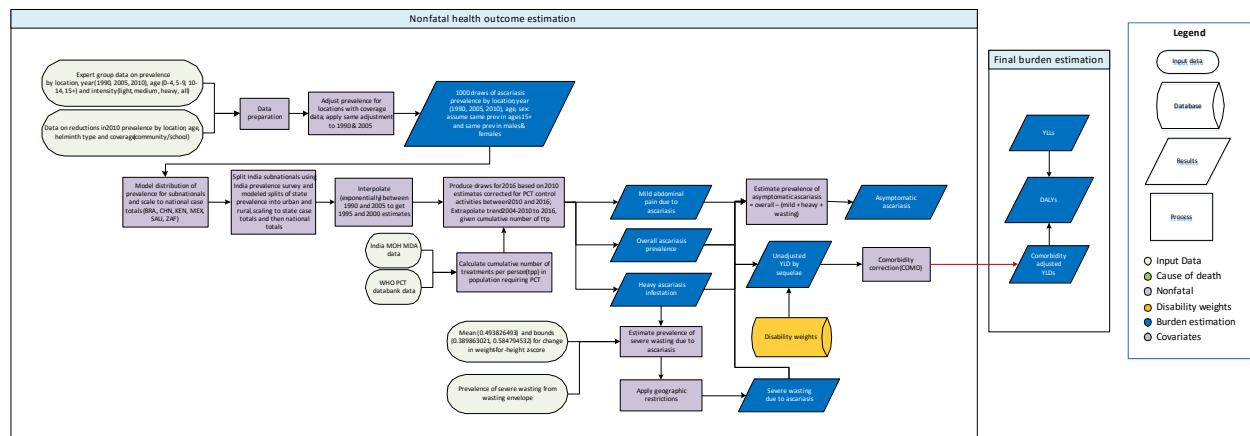

## Input data and methodological summary

### Case definition

Ascariasis is a helminthic disease caused by the parasitic roundworm *Ascaris lumbricoides*. It is one of the three intestinal nematode infections (INI), or soil-transmitted helminthiasis (STH), that are modelled in GBD. Diagnosis is made by examination of stool by microscope or PCR, with or without concentration procedures. The ICD-10 codes for ascariasis are B77-B77.9.

### Input data

#### Expert Group Data

Input data for this model was compiled from various sources. Prevalence data prepared by the GBD expert group (EG) during GBD 2010 [1, 2] contained mean prevalence with confidence intervals, stratified by location, year (1990, 2005, 2010), age group (0-4, 5-9, 10-14, 15+ years) and intensity of infection (light, medium, heavy, all). For the model, light infestation was not attributed any disability. The expert group also provided data on reduction of prevalence in 2010, stratified by location, age group and Mass Drug Administration (MDA) coverage strategy (community/school). The table below shows the number of countries or subnational units and GBD world regions represented in the data.

**Table 1a. Geographic Spread of Expert Group Prevalence Data**

|                        | prevalence |
|------------------------|------------|
| Countries/subnationals | 160        |
| GBD world regions      | 17         |

#### Mass Drug Administration

Data on national MDA program coverage was downloaded from the WHO PCT Databank source site [3]. This data spanned 119 GBD locations over 13 years beginning in 2003.



## India Ministry of Health

Collaborators from the Indian Ministry of Health provided supplementary prevalence data [4] and MDA coverage data for India [5]. This data was available for all Indian states but was not available at the most detailed GBD location specification for the country: urban and rural. Data on MDA coverage was available for the years 2013-2016 while prevalence data was only available for 2015.

## Severe Wasting Estimates

To inform the wasting model, 1,000 draws of severe wasting prevalence among children under 5 years were ascertained from GBD 2016 estimates – the methods used to generate estimates of wasting prevalence are detailed elsewhere (part of risk factors documentation) [6].

## Geographic Restrictions

We conducted a literature review to determine the geographic extent of the disease and classify locations based on whether the disease is absent or present in each year. Locations that were geographically restricted in any given year did not have estimates made for them but could have imported cases attributed to them at a later stage. Of note, we did not attempt a complete systematic review, since a single high-quality source could offer sufficient evidence of presence. Evidence of absence or presence was not available for every location for each year and so assumptions were made for missing years by taking into consideration the epidemiological characteristics of the disease. If evidence indicated disease presence for two non-consecutive years, we assumed presence for all years between the two. If evidence indicated disease absence for two non-consecutive years, we assumed absence for all years between the two. If evidence indicated a change in status (i.e. from absent to present, or present to absent) between two non-consecutive years than we conducted targeted searches to ascertain the relevant year of introduction or elimination for that location. In the cases where presence or absence information was missing for the start or end years of our study interval (1990-2016) without evidence of any introduction or elimination events within the interval, we applied the status of the first and last presence/absence observations respectively to all years between the interval bound and the observation year. Our search was done in conjunction with the title/abstract screening portion of a systematic literature review for prevalence data. The search strings and yield can be viewed in the table below for each of the databases queried.

**Table 1b. Geographic Restriction Search Strings**

| Database       | Search String                                                                                                                                                                                                                                                                                                                                                                                                                                                                                                                                                                                                                                                                                                                 | Yield |
|----------------|-------------------------------------------------------------------------------------------------------------------------------------------------------------------------------------------------------------------------------------------------------------------------------------------------------------------------------------------------------------------------------------------------------------------------------------------------------------------------------------------------------------------------------------------------------------------------------------------------------------------------------------------------------------------------------------------------------------------------------|-------|
| PubMed         | (Ascariasis[Title/Abstract] OR Ascaris[Title/Abstract] OR "A. lumbricoides"[Title/Abstract] OR Ascaris[MeSH] OR Trichuris[Title/Abstract] OR Trichuriasis[Title/Abstract] OR "Whip Worm"[Title/Abstract] OR "T. trichura"[Title/Abstract] OR Trichuris[MeSH] OR Hookworm[Title/Abstract] OR "A. duodenale"[Title/Abstract] OR "Ancylostoma duodenale"[Title/Abstract] OR ancylostomiasis[Title/Abstract] OR "N. americanus"[Title/Abstract] OR "Necator americanus"[Title/Abstract] OR necatoriasis[Title/Abstract] OR Ancylostoma [MeSH] OR Necator[MeSH]) AND (prevalence[Title/Abstract] OR incidence[Title/Abstract] OR epidemiology[Title/Abstract] OR surveillance[Title/Abstract]) NOT(Animals[MeSH] NOT Humans[MeSH]) | 2376  |
| Web of Science | (Ascariasis OR Ascaris OR A. lumbricoides OR Trichuris OR Trichuriasis OR Whip Worm OR T. trichura OR Hookworm OR A. duodenale OR Ancylostoma duodenale OR ancylostomiasis OR N. americanus OR Necator americanus OR                                                                                                                                                                                                                                                                                                                                                                                                                                                                                                          | 2266  |

|        |                                                                                                                                                                                                                                                                   |    |
|--------|-------------------------------------------------------------------------------------------------------------------------------------------------------------------------------------------------------------------------------------------------------------------|----|
|        | necatoriasis) AND TOPIC:(prevalence OR incidence OR epidemiology OR surveillance) NOTTOPIC: ((Animals NOT Humans))<br>Timespan: 1980-2016. Indexes: SCI-EXPANDED, SSCI, A&HCI, ESCI.                                                                              |    |
| SCOPUS | TITLE-ABS_KEY (ascariasis OR ascaris OR a. lumbricoides OR trichuris OR trichuriasis OR whip worm OR t. trichura OR hookworm OR a. duodenale OR ancylostoma duodenale OR ancylostomiasis OR n. americanus OR necator americanus OR necatoriasis) AND PUBYEAR>1979 | 29 |

These papers were used to classify location-years for all locations and years present in the literature. Additionally, systematic literature reviews, meta-analyses, national health statistics publications and collaborator input were used to classify location-years not present in the literature review wherever possible.

### Severity splits/sequelae

The table below shows the list of sequelae due to ascariasis and the associated disability weights (DW). Prevalence of medium infection and heavy infection were mapped to *mild abdominopelvic problems* and *heavy infestation of ascariasis* respectively. Light infection was not attributed any disability.

**Table 2. Sequelae, lay descriptions, and disability weights (DWs)**

| Sequela                      | Lay description                                                                            | DW                  |
|------------------------------|--------------------------------------------------------------------------------------------|---------------------|
| Mild abdominopelvic problems | has some pain in the belly that causes nausea but does not interfere with daily activities | 0.011 (0.005–0.021) |
| Heavy infestation            | has cramping pain and a bloated feeling in the belly                                       | 0.027 (0.015–0.043) |
| Severe wasting               | is extremely skinny and has no energy                                                      | 0.128 (0.082–0.183) |
| Asymptomatic ascariasis      | N/A                                                                                        | N/A                 |

### Modelling strategy

In the estimation of morbidity due to ascariasis, the EG data were first prepared by formatting the location names to be consistent with the GBD 2016 location names and applying the 2010 prevalence to 1990 and 2005 for sub-Saharan Africa countries – estimates for these two years were missing. This was followed by using the data on reductions in 2010 prevalence to adjust the prevalence for locations with coverage data. After this adjustment, only data for medium infection, heavy infection, and all infection were retained.

Using the mean prevalence and the upper and lower bounds of the mean provided by the EG, 1,000 draws of prevalence were generated. This was done by multiplying the mean estimates by the exponent of random draws from a normal distribution with mean = 0 and standard deviation = sd, where  $sd = \frac{\ln(\text{upper}) - \ln(\text{lower})}{\text{invnormal}(0.975) * 2}$ . These draws were created for all GBD age-groups, assuming the same prevalence in ages 15+ and same prevalence in males and females.

Since the draws were only at the national level, subnational locations were modelled for Brazil, China, Indonesia, Kenya, Mexico, Saudi Arabia, and South Africa. This was done using a generalized linear model with a binomial family, logit link and robust standard errors. The predicted cases for all subnational locations were summed and scaled to the national case total. India subnationals were separately derived by applying the proportion of all national cases in each state from the Indian Ministry of Health data [4] to

the national total. We then applied the modelled proportion of cases in urban or rural locations such that the sum of urban and rural cases in a state equals the state total and the sum of all state cases equals the national total.

To get 1995 and 2000 estimates, exponential interpolation of estimates between 1990 and 2005 was performed. The draws for 2016 were produced based on 2010 estimates corrected for PCT control activities between 2010 and 2016 – this was done by extrapolating the 2004–2010 trend to 2016, given cumulative number of treatments per person calculated using data from the WHO PCT Databank [3] and the Indian Ministry of Health MDA coverage data[5]. The 2004–2010 trend was applied to all intensities of infection. Prevalence was assumed to be zero for the countries with missing input data and also in children younger than 28 days. The resulting estimates were 1,000 draws of ascariasis prevalence by GBD location, year, age, sex, and intensity level (mild, heavy, overall infection). To estimate the prevalence of asymptomatic ascariasis, prevalence of mild and heavy infestation was subtracted from the overall ascariasis prevalence.

The final step in the modelling process was to estimate the prevalence of severe wasting due to ascariasis in age groups 28–364 days and 1–4 years. This was done separately using 1,000 draws of prevalence of heavy infestation due to ascariasis and the wasting envelope prevalence. The initial step in determining prevalence of severe wasting due to ascariasis was generating 1,000 draws of change in weight-for-height z-score per heavy prevalent case from a random normal distribution with mean = 0.493826493 and standard deviation = 0.04972834 (calculated from upper and lower bounds of the mean estimate). The mean, upper, and lower bounds were provided by a GBD collaborator who calculated them based on a published article [6]. The prevalence of severe wasting due to ascariasis was then obtained as a function of change in weight-for-height z-score ( $z\_change$ ) such that prevalence =  $p\_wasting\_env - \Phi(\Phi\_inv(p\_wasting\_env) - z\_change * p)$ , where  $p\_wasting\_env$  = wasting envelope prevalence,  $\Phi\_inv$  is the inverse standard normal cumulative distribution function (cdf), and  $p$  = prevalence of heavy ascariasis infestation. Finally, geographic restrictions were applied to set prevalence to zero in countries with wasting that are not endemic for ascariasis.

Model evaluation was done by plotting prevalence of overall ascariasis and that of each sequela against year for each location and age group. Maps of the global distribution of total ascariasis prevalence and prevalence of sequelae due to ascariasis were also assessed across time and age.

Only minor changes were made to the GBD 2015 modelling strategy including the incorporation of updated data from the WHO PCT databank [3] and data from the Indian Ministry of Health, new modelling of subnational prevalence distribution and new geographic restrictions.

## References

26. Brooker S, Pullan R, Smith J, and Hotez P. Chapter: Intestinal nematodes. Cluster D: Communicable Diseases, Neglected Tropical Diseases Group. Global Burden of Diseases, Injuries, and Risk Factors Study. 2011 (4 July). 1-24.
27. Brooker S & Smith JL. Impact of hookworm infection and deworming on anaemia in non-pregnant populations: a systematic review. *Tropical Medicine and International Health*. 2010. 15,7,776-795.

28. WHO | PCT databank. WHO.  
[http://www.who.int/neglected\\_diseases/preventive\\_chemotherapy/sth/en/](http://www.who.int/neglected_diseases/preventive_chemotherapy/sth/en/) (accessed July 7, 2017).
29. Prevalence data. GBD India Collaborators. Personal Communication.
30. MDA Coverage data. GBD India Collaborators. Personal Communication.
31. Hall A, Hewitt G, Tuffrey V, de Silva N. A review and meta-analysis of the impact of intestinal worms on child growth and nutrition. *Maternal and Child Nutrition*. 2008. 4. 118-236.

# Trichuriasis

## Flowchart

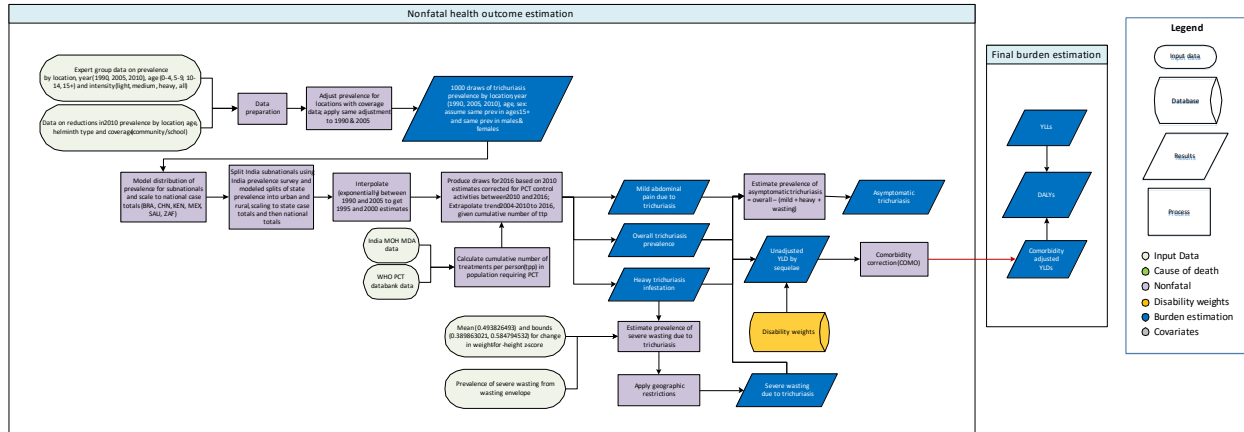

## Input data and methodological summary

### Case definition

Trichuriasis is a helminth diseases caused by the parasitic roundworm *Trichuris trichiura*. It is one of the three intestinal nematode infections (INI), or soil-transmitted helminthiasis (STH), that we model in GBD. Diagnosis is made by examination of stool by microscope or PCR, with or without concentration procedures. The ICD-10 code for trichuriasis is B79.

### Input data

#### Expert Group Data

Input data for this model was compiled from various sources. Prevalence data prepared by the GBD expert group (EG) during GBD 2010 [1, 2] contained mean prevalence with confidence intervals, stratified by location, year (1990, 2005, 2010), age group (0-4, 5-9, 10-14, 15+ years) and intensity of infection (light, medium, heavy, all). For the model, light infestation was not attributed any disability. The expert group also provided data on reduction of prevalence in 2010, stratified by location, age group and Mass Drug Administration (MDA) coverage strategy (community/school). The table below shows the number of countries or subnational units and GBD world regions represented in the data.

**Table 1a. Geographic Spread of Expert Group Prevalence Data**

|                        | prevalence |
|------------------------|------------|
| Countries/subnationals | 160        |
| GBD world regions      | 17         |

## Mass Drug Administration

Data on national MDA program coverage was downloaded from the WHO PCT Databank source site [3]. This data spanned 119 GBD locations over 13 years beginning in 2003.

## India Ministry of Health

Collaborators from the Indian Ministry of Health provided supplementary prevalence data [4] and MDA coverage data for India [5]. This data was available for all Indian states but was not available at the most detailed GBD location specification for the country: urban and rural. Data on MDA coverage was available for the years 2013-2016 while prevalence data was only available for 2015.

## Severe Wasting Estimates

To inform the wasting model, 1,000 draws of severe wasting prevalence among children under 5 years were ascertained from GBD 2016 estimates – the methods used to generate estimates of wasting prevalence are detailed elsewhere (part of risk factors documentation) [6].

## Geographic Restrictions

We conducted a literature review to determine the geographic extent of the disease and classify locations based on whether the disease is absent or present in each year. Locations that were geographically restricted in any given year did not have estimates made for them but could have imported cases attributed to them at a later stage. Of note, we did not attempt a complete systematic review, since a single high-quality source could offer sufficient evidence of presence. Evidence of absence or presence was not available for every location for each year and so assumptions were made for missing years by taking into consideration the epidemiological characteristics of the disease. If evidence indicated disease presence for two non-consecutive years, we assumed presence for all years between the two. If evidence indicated disease absence for two non-consecutive years, we assumed absence for all years between the two. If evidence indicated a change in status (i.e. from absent to present, or present to absent) between two non-consecutive years than we conducted targeted searches to ascertain the relevant year of introduction or elimination for that location. In the cases where presence or absence information was missing for the start or end years of our study interval (1990-2016) without evidence of any introduction or elimination events within the interval, we applied the status of the first and last presence/absence observations respectively to all years between the interval bound and the observation year. Our search was done in conjunction with the title/abstract screening portion of a systematic literature review for prevalence data. The search strings and yield can be viewed in the table below for each of the databases queried.

**Table 1b. Geographic Restriction Search Strings**

| Database | Search String                                                                                                                                                                                                                                                                                                                                                                                                                                                                                                                                                                                  | Yield |
|----------|------------------------------------------------------------------------------------------------------------------------------------------------------------------------------------------------------------------------------------------------------------------------------------------------------------------------------------------------------------------------------------------------------------------------------------------------------------------------------------------------------------------------------------------------------------------------------------------------|-------|
| PubMed   | (Ascariasis[Title/Abstract] OR Ascaris[Title/Abstract] OR "A. lumbricoides"[Title/Abstract] OR Ascaris[MeSH] OR Trichuris[Title/Abstract] OR Trichuriasis[Title/Abstract] OR "Whip Worm"[Title/Abstract] OR "T. trichura"[Title/Abstract] OR Trichuris[MeSH] OR Hookworm[Title/Abstract] OR "A. duodenale"[Title/Abstract] OR "Ancylostoma duodenale"[Title/Abstract] OR ancylostomiasis[Title/Abstract] OR "N. americanus"[Title/Abstract] OR "Necator americanus"[Title/Abstract] OR necatoriasis[Title/Abstract] OR Ancylostoma [MeSH] OR Necator[MeSH]) AND (prevalence[Title/Abstract] OR | 2376  |

|                |                                                                                                                                                                                                                                                                                                                                                                                                           |      |
|----------------|-----------------------------------------------------------------------------------------------------------------------------------------------------------------------------------------------------------------------------------------------------------------------------------------------------------------------------------------------------------------------------------------------------------|------|
|                | incidence[Title/Abstract] OR epidemiology[Title/Abstract] OR surveillance[Title/Abstract]) NOT(Animals[MeSH] NOT Humans[MeSH])                                                                                                                                                                                                                                                                            |      |
| Web of Science | (Ascariasis OR Ascaris OR A. lumbricoides OR Trichuris OR Trichuriasis OR Whip Worm OR T. trichura OR Hookworm OR A. duodenale OR Ancylostoma duodenale OR ancylostomiasis OR N. americanus OR Necator americanus OR necatoriasis) AND TOPIC:(prevalence OR incidence OR epidemiology OR surveillance) NOTTOPIC: ((Animals NOT Humans))<br>Timespan: 1980-2016. Indexes: SCI-EXPANDED, SSCI, A&HCI, ESCI. | 2266 |
| SCOPUS         | TITLE-ABS_KEY (ascariasis OR ascaris OR a. lumbricoides OR trichuris OR trichuriasis OR whip worm OR t. trichura OR hookworm OR a. duodenale OR ancylostoma duodenale OR ancylostomiasis OR n. americanus OR necator americanus OR necatoriasis) AND PUBYEAR>1979                                                                                                                                         | 29   |

These papers were used to classify location-years for all locations and years present in the literature. Additionally, systematic literature reviews, meta-analyses, national health statistics publications and collaborator input were used to classify location-years not present in the literature review wherever possible.

### Severity splits/sequelae

The table below shows the list of sequelae due to trichuriasis and the associated disability weights (DW). Prevalence of medium infection and heavy infection were mapped to *mild abdominopelvic problems* and *heavy infestation of trichuriasis* respectively. Light infection was not attributed any disability.

| Sequela                      | Lay description                                                                            | DW (95% CI)         |
|------------------------------|--------------------------------------------------------------------------------------------|---------------------|
| Mild abdominopelvic problems | has some pain in the belly that causes nausea but does not interfere with daily activities | 0.011 (0.005–0.021) |
| Heavy infestation            | has cramping pain and a bloated feeling in the belly                                       | 0.027 (0.015–0.044) |
| Severe wasting               | is extremely skinny and has no energy                                                      | 0.128 (0.082–0.183) |
| Asymptomatic trichuriasis    | N/A                                                                                        | N/A                 |

In the estimation of morbidity due to trichuriasis, the EG data were first prepared by formatting the location names to be consistent with the GBD 2016 location names and applying the 2010 prevalence to 1990 and 2005 for sub-Saharan Africa countries – estimates for these two years were missing. This was followed by using the data on reductions in 2010 prevalence to adjust the prevalence for locations with coverage data. After this adjustment, only data for medium infection, heavy infection, and all infection were retained.

Using the mean prevalence and the upper and lower bounds of the mean provided by the EG, 1,000 draws of prevalence were generated. This was done by multiplying the mean estimates by the exponent of random draws from a normal distribution with mean = 0 and standard deviation = sd, where  $sd = \frac{\ln(\text{upper}) - \ln(\text{lower})}{\text{invnormal}(0.975) * 2}$ . These draws were created for all GBD age-groups, assuming the same prevalence in ages 15+ and same prevalence in males and females.

Since the draws were only at the national level, subnational locations were modelled for Brazil, China, Indonesia, Kenya, Mexico, Saudi Arabia, and South Africa. This was done using a generalized linear model with a binomial family, logit link and robust standard errors. The predicted cases for all subnational

locations were summed and scaled to the national case total. India subnationals were separately derived by applying the proportion of all national cases in each state from the Indian Ministry of Health data [4] to the national total. We then applied the modelled proportion of cases in urban or rural locations such that the sum of urban and rural cases in a state equals the state total and the sum of all state cases equals the national total.

To get 1995 and 2000 estimates, exponential interpolation of estimates between 1990 and 2005 was performed. The draws for 2016 were produced based on 2010 estimates corrected for PCT control activities between 2010 and 2016 – this was done by extrapolating the 2004–2010 trend to 2016, given cumulative number of treatments per person calculated using data from the WHO PCT Databank [3] and the Indian Ministry of Health MDA coverage data[5]. The 2004–2010 trend was applied to all intensities of infection. Prevalence was assumed to be zero for the countries with missing input data and also in children younger than 28 days. The resulting estimates were 1,000 draws of trichuriasis prevalence by GBD location, year, age, sex, and intensity level (mild, heavy, overall infection). To estimate the prevalence of asymptomatic trichuriasis, prevalence of mild and heavy infestation was subtracted from the overall trichuriasis prevalence.

Erroneous outliers in the original prevalence data in several countries were dealt with by replacing national prevalence with the associated regional prevalence and re-assigning all heavy infection cases to mild infection in countries with consistently operating MDA programs. This applied to countries where original prevalence data produced more than 100 YLDs per 100,000 people including Kiribati, Marshall Islands, Malaysia, Philippines, Swaziland and South Africa. These were significant outliers and not thought plausible according to available literature.

The final step in the modelling process was to estimate the prevalence of severe wasting due to trichuriasis in age groups 28–364 days and 1–4 years. This was done separately using 1,000 draws of prevalence of heavy infestation due to trichuriasis and the wasting envelope prevalence. The initial step in determining prevalence of severe wasting due to trichuriasis was generating 1,000 draws of change in weight-for-height z-score per heavy prevalent case from a random normal distribution with mean = 0.493826493 and standard deviation = 0.04972834 (calculated from upper and lower bounds of the mean estimate). The mean, upper, and lower bounds were provided by a GBD collaborator who calculated them based on a published article [6]. The prevalence of severe wasting due to trichuriasis was then obtained as a function of change in weight-for-height z-score ( $z\_change$ ) such that prevalence =  $p\_wasting\_env - \Phi(\Phi\_inv(p\_wasting\_env) - z\_change * p)$ , where  $p\_wasting\_env$  = wasting envelope prevalence,  $\Phi\_inv$  is the inverse standard normal cumulative distribution function (cdf), and  $p$  = prevalence of heavy trichuriasis infestation. Finally, geographic restrictions were applied to set prevalence to zero in countries with wasting that are not endemic for trichuriasis.

Model evaluation was done by plotting prevalence of overall trichuriasis and that of each sequela against year for each location and age group. Maps of the global distribution of total trichuriasis prevalence and prevalence of sequelae due to trichuriasis were also assessed across time and age.

Only minor changes were made to the GBD 2015 modelling strategy including the incorporation of updated data from the WHO PCT databank [3] and data from the Indian Ministry of Health, new modelling of subnational prevalence distribution and new geographic restrictions.



## References

32. Brooker S, Pullan R, Smith J, and Hotez P. Chapter: Intestinal nematodes. Cluster D: Communicable Diseases, Neglected Tropical Diseases Group. Global Burden of Diseases, Injuries, and Risk Factors Study. 2011 (4 July). 1-24.
33. Brooker S & Smith JL. Impact of hookworm infection and deworming on anaemia in non-pregnant populations: a systematic review. *Tropical Medicine and International Health*. 2010. 15,7,776-795.
34. WHO | PCT databank. WHO.  
[http://www.who.int/neglected\\_diseases/preventive\\_chemotherapy/sth/en/](http://www.who.int/neglected_diseases/preventive_chemotherapy/sth/en/) (accessed July 7, 2017).
35. Prevalence data. GBD India Collaborators. Personal Communication.
36. MDA Coverage data. GBD India Collaborators. Personal Communication.
37. Hall A, Hewitt G, Tuffrey V, de Silva N. A review and meta-analysis of the impact of intestinal worms on child growth and nutrition. *Maternal and Child Nutrition*. 2008. 4. 118-236.

# Hookworm Disease

## Flowchart

### Hookworm

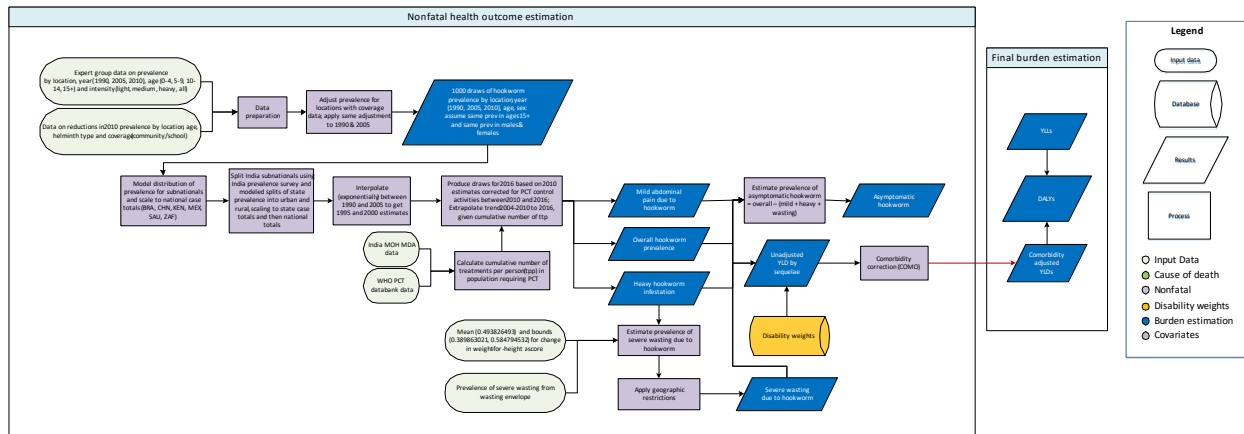

## Input data and methodological summary

### Case Definition

Hookworm disease is a helminthic disease caused by the parasitic roundworms, *Ancylostoma duodenale* and *Necator americanus*. It is one of the three intestinal nematode infections (INI), or soil-transmitted helminthiasis (STH), that we model in GBD. Diagnosis is made by examination of stool by microscope or PCR, with or without concentration procedures. The ICD-10 codes for hookworm disease are B76-B76.9.

### Input data

#### Expert Group Data

Input data for this model was compiled from various sources. Prevalence data prepared by the GBD expert group (EG) during GBD 2010 [1, 2] contained mean prevalence with confidence intervals, stratified by location, year (1990, 2005, 2010), age group (0-4, 5-9, 10-14, 15+ years) and intensity of infection (light, medium, heavy, all). For the model, light infestation was not attributed any disability. The expert group also provided data on reduction of prevalence in 2010, stratified by location, age group and Mass Drug Administration (MDA) coverage strategy (community/school). The table below shows the number of countries or subnational units and GBD world regions represented in the data.

Table 1a. Geographic Spread of Expert Group Prevalence Data

|                        | prevalence |
|------------------------|------------|
| Countries/subnationals | 160        |
| GBD world regions      | 17         |

## Mass Drug Administration

Data on national MDA program coverage was downloaded from the WHO PCT Databank source site [3]. This data spanned 119 GBD locations over 13 years beginning in 2003.

## India Ministry of Health

Collaborators from the Indian Ministry of Health provided supplementary prevalence data [4] and MDA coverage data for India [5]. This data was available for all Indian states but was not available at the most detailed GBD location specification for the country: urban and rural. Data on MDA coverage was available for the years 2013-2016 while prevalence data was only available for 2015.

## Severe Wasting Estimates

To inform the wasting model, 1,000 draws of severe wasting prevalence among children under 5 years were ascertained from GBD 2016 estimates – the methods used to generate estimates of wasting prevalence are detailed elsewhere (part of risk factors documentation) [6].

## Geographic Restrictions

We conducted a literature review to determine the geographic extent of the disease and classify locations based on whether the disease is absent or present in each year. Locations that were geographically restricted in any given year did not have estimates made for them but could have imported cases attributed to them at a later stage. Of note, we did not attempt a complete systematic review, since a single high-quality source could offer sufficient evidence of presence. Evidence of absence or presence was not available for every location for each year and so assumptions were made for missing years by taking into consideration the epidemiological characteristics of the disease. If evidence indicated disease presence for two non-consecutive years, we assumed presence for all years between the two. If evidence indicated disease absence for two non-consecutive years, we assumed absence for all years between the two. If evidence indicated a change in status (i.e. from absent to present, or present to absent) between two non-consecutive years than we conducted targeted searches to ascertain the relevant year of introduction or elimination for that location. In the cases where presence or absence information was missing for the start or end years of our study interval (1990-2016) without evidence of any introduction or elimination events within the interval, we applied the status of the first and last presence/absence observations respectively to all years between the interval bound and the observation year. Our search was done in conjunction with the title/abstract screening portion of a systematic literature review for prevalence data. The search strings and yield can be viewed in the table below for each of the databases queried.

**Table 1b. Geographic Restriction Search Strings**

| Database | Search String                                                                                                                                                                                                                                                                                                                                                                                                                                                                                                                                                                                  | Yield |
|----------|------------------------------------------------------------------------------------------------------------------------------------------------------------------------------------------------------------------------------------------------------------------------------------------------------------------------------------------------------------------------------------------------------------------------------------------------------------------------------------------------------------------------------------------------------------------------------------------------|-------|
| PubMed   | (Ascariasis[Title/Abstract] OR Ascaris[Title/Abstract] OR "A. lumbricoides"[Title/Abstract] OR Ascaris[MeSH] OR Trichuris[Title/Abstract] OR Trichuriasis[Title/Abstract] OR "Whip Worm"[Title/Abstract] OR "T. trichura"[Title/Abstract] OR Trichuris[MeSH] OR Hookworm[Title/Abstract] OR "A. duodenale"[Title/Abstract] OR "Ancylostoma duodenale"[Title/Abstract] OR ancylostomiasis[Title/Abstract] OR "N. americanus"[Title/Abstract] OR "Necator americanus"[Title/Abstract] OR necatoriasis[Title/Abstract] OR Ancylostoma [MeSH] OR Necator[MeSH]) AND (prevalence[Title/Abstract] OR | 2376  |

|                |                                                                                                                                                                                                                                                                                                                                                                                                           |      |
|----------------|-----------------------------------------------------------------------------------------------------------------------------------------------------------------------------------------------------------------------------------------------------------------------------------------------------------------------------------------------------------------------------------------------------------|------|
|                | incidence[Title/Abstract] OR epidemiology[Title/Abstract] OR surveillance[Title/Abstract]) NOT(Animals[MeSH] NOT Humans[MeSH])                                                                                                                                                                                                                                                                            |      |
| Web of Science | (Ascariasis OR Ascaris OR A. lumbricoides OR Trichuris OR Trichuriasis OR Whip Worm OR T. trichura OR Hookworm OR A. duodenale OR Ancylostoma duodenale OR ancylostomiasis OR N. americanus OR Necator americanus OR necatoriasis) AND TOPIC:(prevalence OR incidence OR epidemiology OR surveillance) NOTTOPIC: ((Animals NOT Humans))<br>Timespan: 1980-2016. Indexes: SCI-EXPANDED, SSCI, A&HCI, ESCI. | 2266 |
| SCOPUS         | TITLE-ABS_KEY (ascariasis OR ascaris OR a. lumbricoides OR trichuris OR trichuriasis OR whip worm OR t. trichura OR hookworm OR a. duodenale OR ancylostoma duodenale OR ancylostomiasis OR n. americanus OR necator americanus OR necatoriasis) AND PUBYEAR>1979                                                                                                                                         | 29   |

These papers were used to classify location-years for all locations and years present in the literature. Additionally, systematic literature reviews, meta-analyses, national health statistics publications and collaborator input were used to classify location-years not present in the literature review wherever possible.

### Severity splits/sequelae

The table below shows the list of sequelae due to hookworm and the associated disability weights (DW). Prevalence of medium infection and heavy infection were mapped to *mild abdominopelvic problems* and *heavy infestation of hookworm* respectively. Light infection was not attributed any disability.

**Table 2. Sequelae, lay descriptions, and disability weights (DWs)**

| Sequela                       | Lay description                                                                                                                 | DW                  |
|-------------------------------|---------------------------------------------------------------------------------------------------------------------------------|---------------------|
| Mild abdominopelvic problems  | has some pain in the belly that causes nausea but does not interfere with daily activities                                      | 0.011 (0.005–0.021) |
| Heavy infestation             | has cramping pain and a bloated feeling in the belly                                                                            | 0.027 (0.015–0.044) |
| Severe wasting                | is extremely skinny and has no energy                                                                                           | 0.128 (0.082–0.183) |
| Asymptomatic hookworm disease | NA                                                                                                                              | NA                  |
| Mild anaemia                  | feels slightly tired and weak at times, but this does not interfere with normal daily activities                                | 0.004 (0.001–0.008) |
| Moderate anaemia              | feels moderate fatigue, weakness, and shortness of breath after exercise, making daily activities more difficult                | 0.052 (0.034–0.076) |
| Severe anaemia                | feels very weak, tired and short of breath, and has problems with activities that require physical effort or deep concentration | 0.149 (0.101–0.210) |

### Modelling strategy

In the estimation of morbidity due to hookworm disease, the EG data were first prepared by formatting the location names to be consistent with the GBD 2016 location names and applying the 2010 prevalence

to 1990 and 2005 for sub-Saharan Africa countries – estimates for these two years were missing. This was followed by using the data on reductions in 2010 prevalence to adjust the prevalence for locations with coverage data. After this adjustment, only data for medium infection, heavy infection, and all infection was retained.

Using the mean prevalence and the upper and lower bounds of the mean provided by the EG, 1,000 draws of prevalence were generated. This was done by multiplying the mean estimates by the exponent of random draws from a normal distribution with mean = 0 and standard deviation = sd, where  $sd = \frac{\ln(\text{upper}) - \ln(\text{lower})}{\text{invnormal}(0.975) * 2}$ . These draws were created for all GBD age groups, assuming the same prevalence in ages 15+ and same prevalence in males and females.

Since the draws were only at the national level, subnational locations were modelled for Brazil, China, Indonesia, Kenya, Mexico, Saudi Arabia, and South Africa. This was done using a generalized linear model with a binomial family, logit link and robust standard errors. The predicted cases for all subnational locations were summed and scaled to the national case total. India subnationals were separately derived by applying the proportion of all national cases in each state from the Indian Ministry of Health data [4] to the national total. We then applied the modelled proportion of cases in urban or rural locations such that the sum of urban and rural cases in a state equals the state total and the sum of all state cases equals the national total.

To get 1995 and 2000 estimates, exponential interpolation of estimates between 1990 and 2005 was performed. The draws for 2016 were produced based on 2010 estimates corrected for PCT control activities between 2010 and 2016 – this was done by extrapolating the 2004–2010 trend to 2016, given cumulative number of treatments per person calculated using data from the WHO PCT Databank [3] and the Indian Ministry of Health MDA coverage data[5]. The 2004–2010 trend was applied to all intensities of infection. Prevalence was assumed to be zero for the countries with missing input data and also in children younger than 28 days. The resulting estimates were 1,000 draws of hookworm prevalence by GBD location, year, age, sex, and intensity level (mild, heavy, overall infection). To estimate the prevalence of asymptomatic hookworm, prevalence of mild and heavy infestation was subtracted from the overall hookworm prevalence.

The final step in the modelling process was to estimate the prevalence of severe wasting due to hookworm in age groups 28–364 days and 1–4 years. This was done separately using 1,000 draws of prevalence of heavy infestation due to hookworm and the wasting envelope prevalence. The initial step in determining prevalence of severe wasting due to hookworm was generating 1,000 draws of change in weight-for-height z-score per heavy prevalent case from a random normal distribution with mean = 0.493826493 and standard deviation = 0.04972834 (calculated from upper and lower bounds of the mean estimate). The mean, upper, and lower bounds were provided by a GBD collaborator who calculated them based on a published article [6]. The prevalence of severe wasting due to hookworm was then obtained as a function of change in weight-for-height z-score ( $z\_change$ ) such that  $prevalence = p\_wasting\_env - \Phi(\Phi\_inv(p\_wasting\_env) - z\_change * p)$ , where  $p\_wasting\_env$  = wasting envelope prevalence,  $\Phi\_inv$  is the inverse standard normal cumulative distribution function (cdf), and  $p$  = prevalence of heavy hookworm infestation. Finally, geographic restrictions were applied to set prevalence to zero in countries with wasting that are not endemic for hookworm.

The burden of anemia due to hookworm disease was estimated separately (see anemia documentation for details).

Model evaluation was done by plotting prevalence of overall hookworm disease and that of each sequelae against year for each location and age group. Maps of the global distribution of total hookworm disease prevalence and prevalence of sequelae due to hookworm disease were also assessed across time and age.

Only minor changes were made to the GBD 2015 modelling strategy including the incorporation of updated data from the WHO PCT databank [3] and data from the Indian Ministry of Health, new modelling of subnational prevalence distribution and new geographic restrictions.

## References

38. Brooker S, Pullan R, Smith J, and Hotez P. Chapter: Intestinal nematodes. Cluster D: Communicable Diseases, Neglected Tropical Diseases Group. Global Burden of Diseases, Injuries, and Risk Factors Study. 2011 (4 July). 1-24.
39. Brooker S & Smith JL. Impact of hookworm infection and deworming on anaemia in non-pregnant populations: a systematic review. *Tropical Medicine and International Health*. 2010. 15,7,776-795.
40. WHO | PCT databank. WHO.  
[http://www.who.int/neglected\\_diseases/preventive\\_chemotherapy/sth/en/](http://www.who.int/neglected_diseases/preventive_chemotherapy/sth/en/) (accessed July 7, 2017).
41. Prevalence data. GBD India Collaborators. Personal Communication.
42. MDA Coverage data. GBD India Collaborators. Personal Communication.
43. Hall A, Hewitt G, Tuffrey V, de Silva N. A review and meta-analysis of the impact of intestinal worms on child growth and nutrition. *Maternal and Child Nutrition*. 2008. 4. 118-236.

# Foodborne Trematodiasis

## Flowcharts

### Clonorchiasis

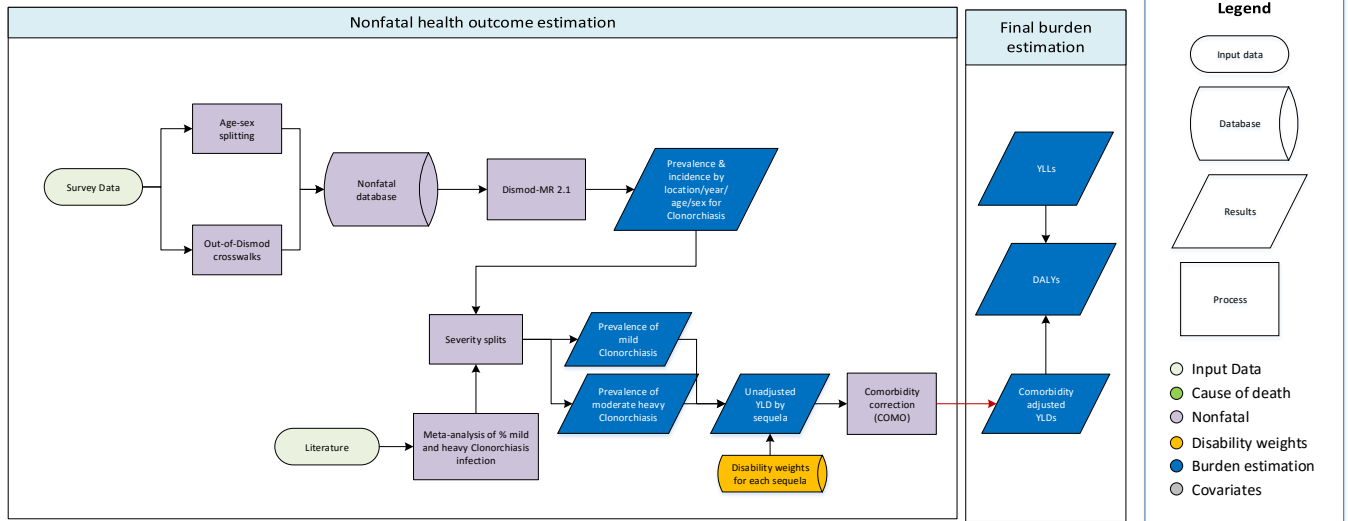

### Fascioliasis

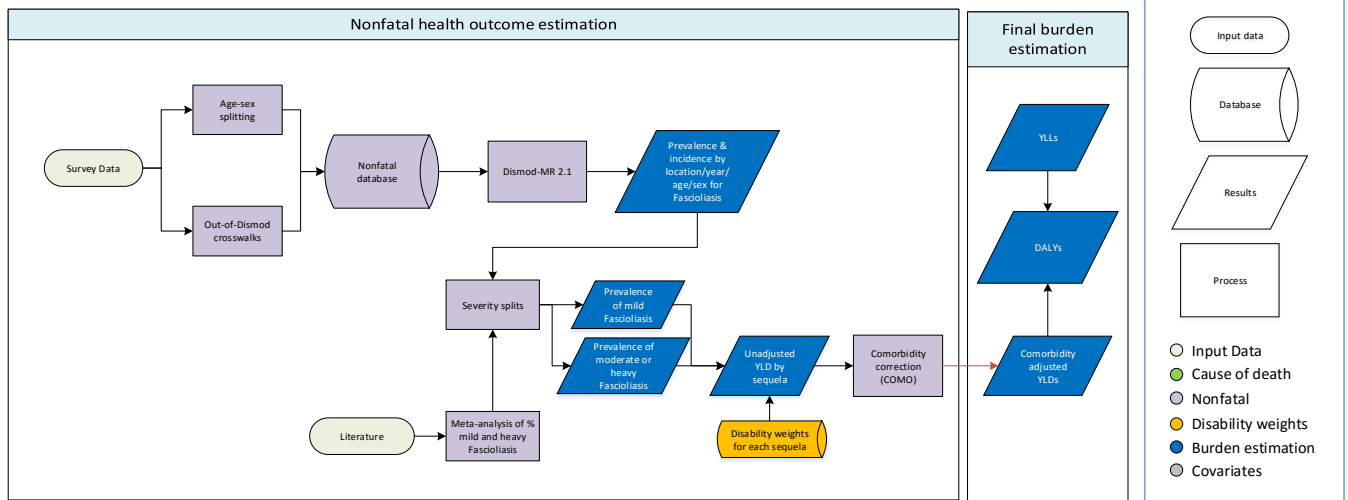

## Intestinal fluke

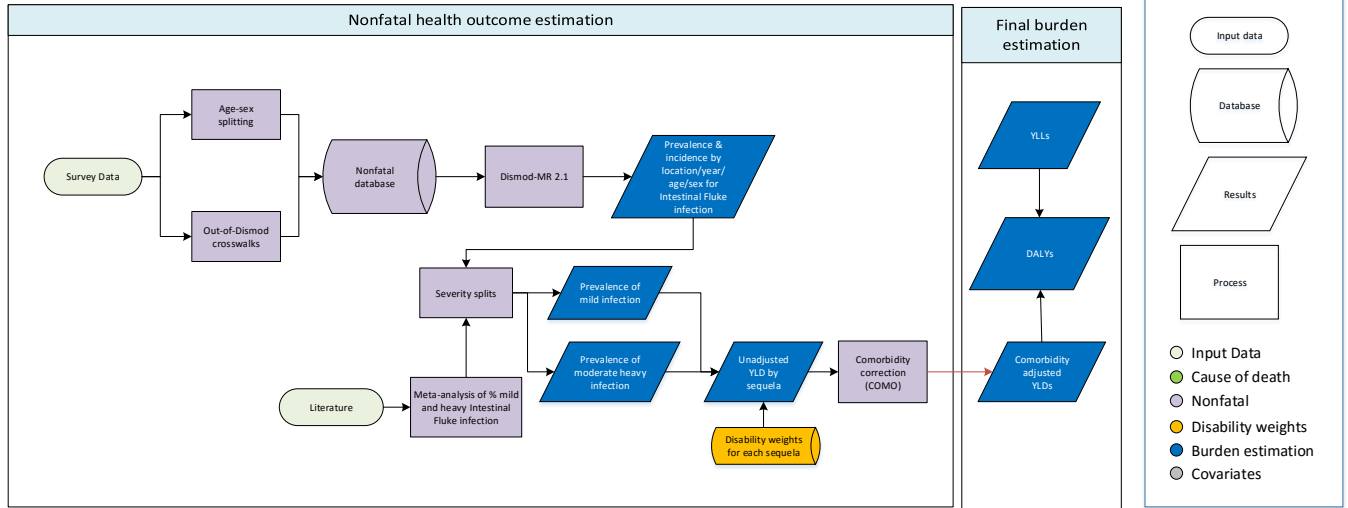

## Opisthorchiasis

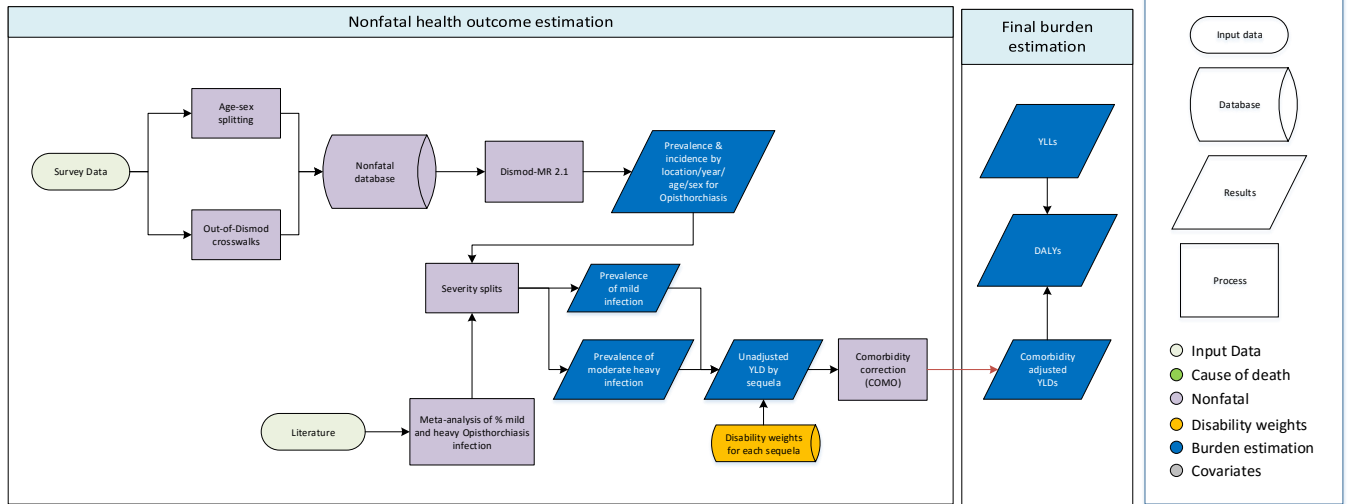



## Paragonimiasis

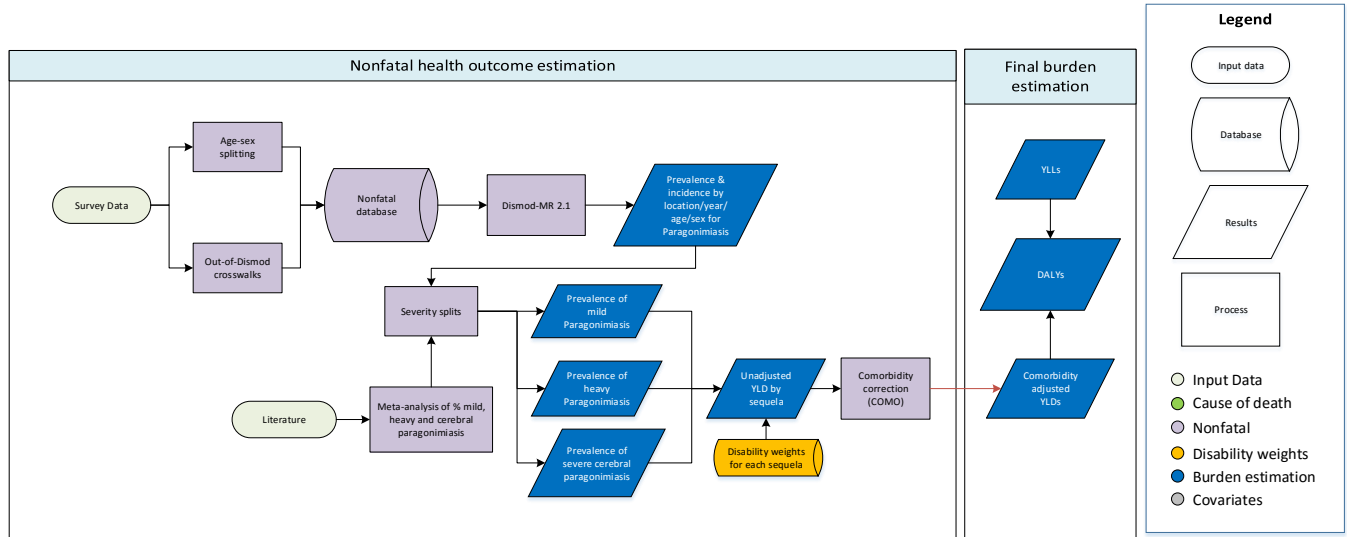

## Input Data & Methodological Summary

### Case definition

Human foodborne trematodiasis (FBT) is defined as the infection with parasitic worms of the class trematoda, which are also known as flukes. Trematodes are transmitted via contaminated food and infection is highly related to food habits. Definitive hosts, including humans, become infected when ingesting viable metacercariae by consuming contaminated aquatic products (eg, watercress). In the ICD-10, FBT are listed under code B66 [1].

FBT is subdivided into six types of FBT (see Table 1):

- Clonorchiasis
- Fascioliasis
- Intestinal fluke
- Opisthorchiasis
- Paragonimiasis (normal and cerebral infections)

Table 1. Subtypes of FBT

|   | Species of FBT                                                | Also known as:        | Carcinogen                                                   |
|---|---------------------------------------------------------------|-----------------------|--------------------------------------------------------------|
| 1 | Chlonorchiasis                                                | (Chinese) Liver fluke | Associated with cholangiocarcinoma                           |
| 2 | Opisthorchiasis<br>( <i>O viverrini</i> & <i>O felineus</i> ) | Liver fluke           | Associated with cholangiocarcinoma<br>( <i>O viverrini</i> ) |
| 3 | Fascioliasis                                                  | Liver fluke           | No available evidence                                        |
| 4 | Intestinal fluke                                              | Liver fluke           | No available evidence                                        |
| 5 | Paragonimiasis                                                | Lung fluke            |                                                              |

### Thresholds for heavy infection and duration by species of FBT

The majority of people infected with FBTs are asymptomatic. When symptoms do occur they are often non-specific. Among the clinical symptomatic group, severity is associated with worm burden, typically measured by fecal egg counts, and the duration of infection. The thresholds for heavy infection and duration by species of FBT are shown in Table 2. The clinical presentation of FBT depends on the target organs (liver, lung, or intestines). Clonorchiasis and opisthorchiasis patients may suffer from loss of appetite, fullness, indigestion, diarrhoea, pain in the right upper quadrant, lassitude, weight loss, ascites, and oedema.[2, 3] Cholangitis, obstructive jaundice, intra-abdominal mass, cholecystitis, and gallbladder or intrahepatic stones may occur as complications.[3, 4]

Table 2. Thresholds for heavy infection and duration by species of FBT

|   | Species of FBT          | Case thresholds for heavy infection                                           | Duration |
|---|-------------------------|-------------------------------------------------------------------------------|----------|
| 1 | Chlonorchiasis          | 10,000 eggs per g of feces                                                    | lifelong |
| 2 | Opisthorchiasis         | 10,000 eggs per g of feces                                                    | lifelong |
| 3 | Fascioliasis            | 1,000 eggs per g of faces                                                     | lifelong |
| 4 | Intenstinal fluke       | 1,000 eggs per g of faces                                                     | lifelong |
| 5 | Paragonimiasis          | 100 eggs per 5 ml sputum                                                      | lifelong |
| 6 | Cerebral paragonimiasis | Any infection of the brain with flukes and/or eggs of <i>Paragonimus</i> spp. | lifelong |

### Input data

#### Model inputs

For GBD 2010, the data came from the expert group and is the result of their analysis. The expert group analysis used the results of a systematic literature review performed by Furst et al. as a starting point for the analysis.[5] Furst et al. searched PubMed, WHOLIS, FAOBIB, Embase, CAB Abstracts, Literatura Latino Americana e do Caribe em Ciências de Saúde (LILACS), ISI Web of Science, BIOSIS preview, Science Direct, African Journals OnLine (AJOL), and the System for Information on Grey Literature in Europe (SIGLE), period Jan 1, 1980, to

Dec 31, 2008. The initial number of studies identified through the literature review was ~34,000 references. The literature review included extracted data from 181 studies. For GBD 2013 and GBD 2015 the search strategy was replicated to capture epidemiological studies published between 2008 and 2015. Due to the cyclical nature of systematic review for GBD causes, no data collection was scheduled for GBD 2016. As such, foodborne trematodiasis will be a priority for the next iteration of the study.

#### Input data for the assessment of the total national number of infected people

Only studies that used countrywide surveys to estimate the national prevalence rates were included (or for China, province-wide surveys). Reason for choosing only national studies is that FBT shows a highly focal spatial distribution and local cross-sectional surveys would profoundly under- or overestimate true



|       |     |     |     |     |    |     |     |     |     |
|-------|-----|-----|-----|-----|----|-----|-----|-----|-----|
| 0-9   | 30% | 17% | 44% | 10% | 0% | 29% | 8%  | 3%  | 14% |
| 10-19 | 15% | 0%  | 43% | 15% | 0% | 69% | 11% | 8%  | 14% |
| 20-29 | 18% | 10% | 29% | 16% | 0% | 52% | 18% | 15% | 21% |
| 30-39 | 17% | 5%  | 34% | 21% | 0% | 56% | 22% | 17% | 28% |
| 40-49 | 22% | 13% | 32% | 28% | 1% | 68% | 22% | 13% | 32% |
| 50-59 | 18% | 0%  | 49% | 29% | 0% | 75% | 17% | 9%  | 28% |
| 60+   | 32% | 18% | 47% | 25% | 0% | 64% | 15% | 8%  | 23% |

Table 4. Percentage of high-intensity infection by type of FBT (based on 4 FBT prevalence studies)

| Type of FBT    | Mean | Low | High |
|----------------|------|-----|------|
| Paragonimiasis | 23%  | 0%  | 59%  |
| Fascioliasis   | 19%  | 3%  | 41%  |

### Cerebral paragonimiasis

It was assumed that 0.8% of paragonimiasis cases have cerebral involvement. This proportion was used to estimate the prevalence of cerebral paragonimiasis. This proportion is based on one study. The data are from Oh SJ. The rate of cerebral involvement in paragonimiasis: an epidemiologic study. *Jpn J Parasitol* 1969;18:211-14. The study was performed in Paju, South Korea. This is an area with 6,738 inhabitants and according to the survey, it was estimated that 29.6% of all individuals would react to intradermal test (= an immunological reaction indicating previous or current contact to the parasite). 25% of all “positive reactors” may have eggs in their sputum (= active infection with the parasite currently present in the human host). If these rates are applied to the community as a whole, the number of patients with active paragonimiasis would be at least 498 ( $=6,738 \times 0.296 \times 0.25$ ). Furthermore, four cases of cerebral paragonimiasis were found in this community. Therefore, four out of 498 individuals with active paragonimus infection suffered from cerebral infection ( $=0.80\%$ ; 95% confidence interval 0.019%–1.587%).

### Severity splits and disability weights

For GBD 2016, FBT was not split into health states with different severities. The table below shows the GBD 2016 disability weights that were used to calculate the burden of FBT in YLDs.

Table 5. Disability weights that were used to calculate FBT YLDs

| Sequelae                     | Severity description                           | Health state name                | Disability weight   |
|------------------------------|------------------------------------------------|----------------------------------|---------------------|
| Asymptomatic clonorchiasis   | Clonorchiasis, currently without symptoms      | N/A                              | 0.000 (0.000–0.000) |
| Heavy clonorchiasis          | Abdominal pain and nausea reported as moderate | Abdominopelvic problem, moderate | 0.114 (0.078–0.159) |
| Asymptomatic opisthorchiasis | Opisthorchiasis, currently without symptoms    | N/A                              | 0.000 (0.000–0.000) |

|                                         |                                                        |                                                   |                     |
|-----------------------------------------|--------------------------------------------------------|---------------------------------------------------|---------------------|
| Heavy opisthorchiasis                   | Abdominal pain and nausea reported as moderate         | Abdominopelvic problem, moderate                  | 0.114 (0.078–0.159) |
| Asymptomatic fascioliasis               | Fascioliasis, currently without symptoms               | N/A                                               | 0.000 (0.000–0.000) |
| Heavy fascioliasis                      | Abdominal pain and nausea reported as moderate         | Abdominopelvic problem, moderate                  | 0.114 (0.078–0.159) |
| Asymptomatic intestinal fluke infection | Intestinal fluke infection, currently without symptoms | N/A                                               | 0.000 (0.000–0.000) |
| Heavy intestinal fluke infection        | Abdominal pain and nausea reported as moderate         | Abdominopelvic problem, moderate                  | 0.114 (0.078–0.159) |
| Asymptomatic paragonimiasis             | Paragonimiasis, currently without symptoms             | N/A                                               | 0.000 (0.000–0.000) |
| Heavy paragonimiasis                    | Cough, fever, and weight loss                          | Tuberculosis, not HIV-infected                    | 0.333 (0.224–0.454) |
| Cerebral paragonimiasis                 | Epilepsy due to cerebral paragonimiasis                | Epilepsy, less severe (seizures < once per month) | 0.263 (0.173–0.367) |
|                                         |                                                        | Epilepsy, severe (seizures >= once per month)     | 0.552 (0.375–0.710) |

Note. N/A: not applicable

## Changes from GBD 2015 to GBD 2016

We have made no substantive changes in the modelling strategy from GBD 2015 to GBD 2016.

## References

1. WHO. *International Statistical Classification of Diseases and Related Health Problems. 10th Revision. Version for 2007.* 2007 [cited 2009 October 14, 2009]; Available from: <http://apps.who.int/classifications/apps/icd/icd10online/>.
2. Rim, H.J., *Clonorchiasis: an update.* J Helminthol, 2005. **79**(3): p. 269-81.
3. Pungpak, S., et al., *Clinical features in severe opisthorchiasis viverrini.* Southeast Asian J Trop Med Public Health, 1985. **16**(3): p. 405-9.
4. Rim, H.J., *The current pathobiology and chemotherapy of clonorchiasis.* Korean J Parasitol, 1986. **24**(Suppl.): p. 1-141.
5. Furst, T., J. Keiser, and J. Utzinger, *Global burden of human food-borne trematodiasis: a systematic review and meta-analysis.* Lancet Infect Dis, 2012. **12**(3): p. 210-21.
6. Furst, T., et al., *Manifestation, diagnosis, and management of foodborne trematodiasis.* BMJ, 2012. **344**: p. e4093.

# Leprosy

## Flowchart

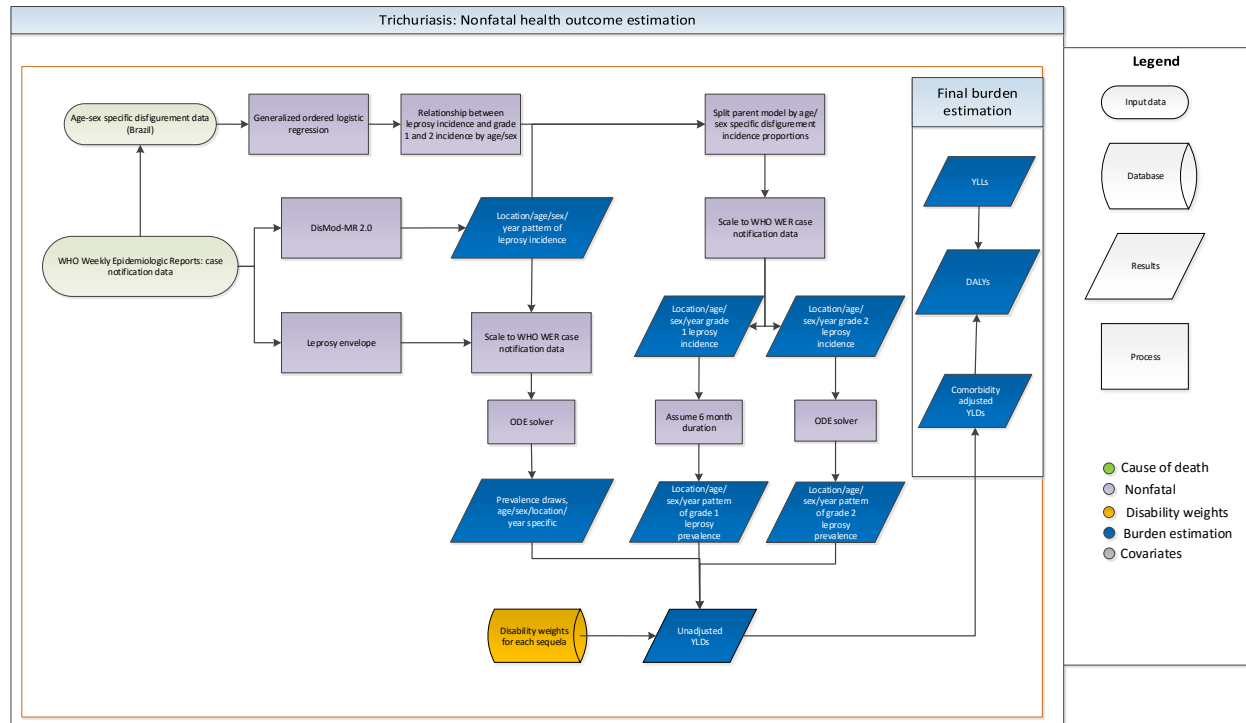

## Input Data and Methodological Summary

### Case definition

Leprosy is a chronic bacterial infection caused by *Mycobacterium leprae*, primarily affecting the nervous system, skin, respiratory tract, and eyes. Transmission is facilitated through contact with fluid from the nose and mouth of an infected individual. The ICD-10 codes for leprosy are A30.9.

### Input data

To model nonfatal outcomes due to leprosy, WHO Weekly Epidemiological Record (WER) case notification data were used from 1987 to 2012 to capture incident cases of leprosy. This is the same database that was used to model GBD 2015 estimates, and due to the cyclical nature of systematic reviews for GBD causes, no data collection was scheduled for GBD 2016. As such, leprosy will be a priority for the next iteration of the study. Stage-specific incidence data for grade 1 and grade 2 leprosy that are used to define age-sex patterns came from Brazil case notification data.

### Modelling strategy

We used a multi-step process for the disease modeling of leprosy. In the first step, we ran a single-parameter model using DisMod-MR 2.0 to estimate the leprosy incidence age pattern by age, sex, year, and country. Then, we scaled the incidence outputs to the WHO WER cases, and used the ordinary differential equations (ODE) solver to calculate prevalence from the scaled DisMod-MR 2.0 incidence outputs.

Severity data were prepared by running a generalized ordered logistic regression using Brazil case notification data to get the relationship between leprosy incidence and grade 1 and grade 2 incidence by age and sex. We then used this relationship to split the parent DisMod-MR 2.0 model, and again scaled to WHO WER severity-specific cases. For disfigurement grade 1, we apply a duration of six months to get prevalence estimates. For disfigurement grade 2, we again use the ODE solver to get prevalence estimates.

Model evaluation was done by separately assessing the fit of the parent DisMod model and checking the final estimates produced after age-sex splits. Plots of time trends of prevalence across locations and age were used to evaluate the results. In addition, maps of the global distribution of leprosy prevalence and prevalence of sequelae due to leprosy were also assessed across time.

### **Changes from GBD 2015 to GBD 2016**

We have made no substantive changes in the modelling strategy from GBD 2015 to GBD 2016.

# Ebola

## Flowchart

# Ebola

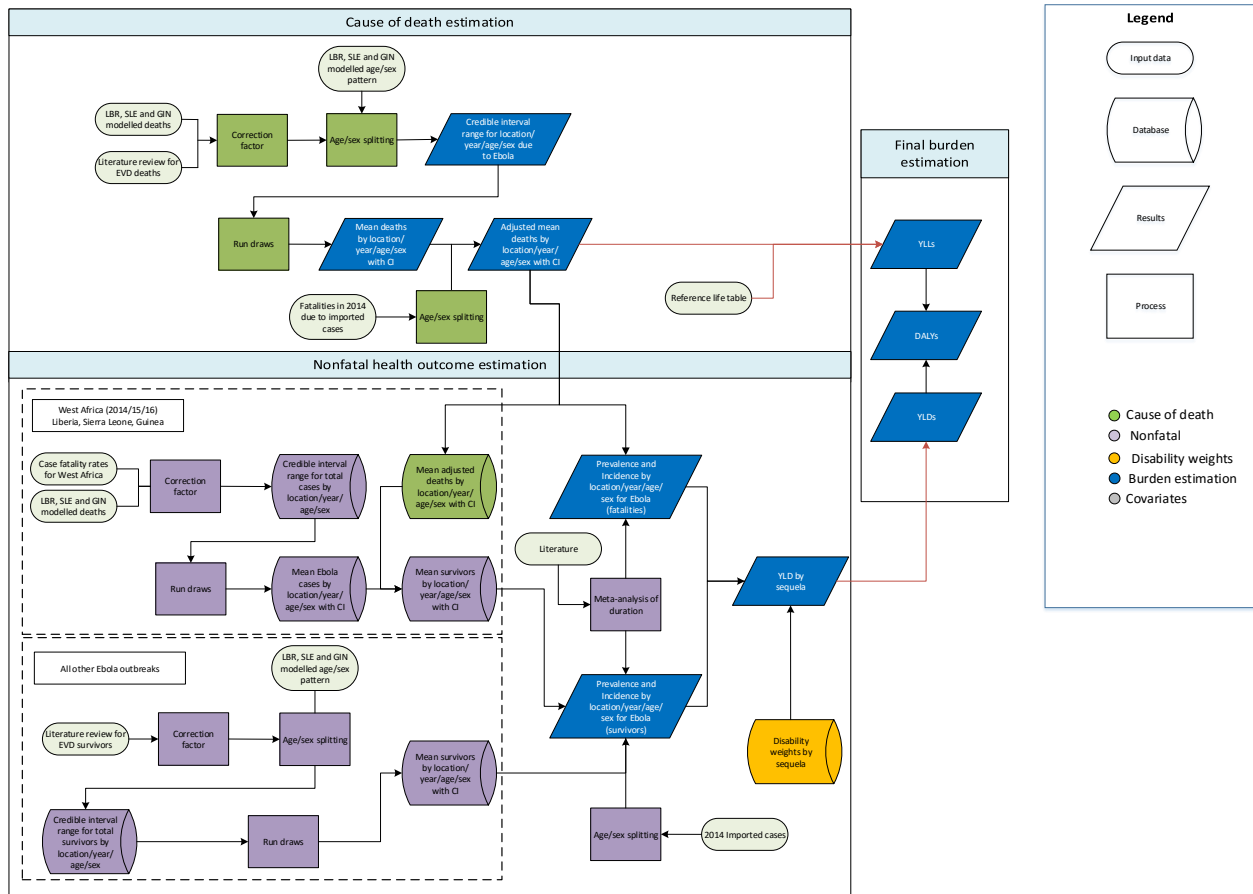

## Input data and methodological summary

### Background and case definition

Ebola virus disease is a relatively rare viral pathogen linked with high case fatality rates in both humans and non-human primates. The disease is zoonotic, and while bats have been implicated as reservoirs, definitive host species are yet to be identified. Once a human becomes infected after viral transmission from animal sources either directly or indirectly, secondary human-to-human transmission is possible, primarily through exchange of infectious bodily fluids and secretions. Clinical cases typically present initially as a febrile illness, similar to a number of different pathogens, subsequently followed by haemorrhagic complications, and often death. Historically there have been a number of outbreaks,



usually no more than a few hundred cases and typically constrained to one country, focused in Central Africa. The West African outbreak, however, which started in Guinea in 2013, has claimed more lives than all previous outbreaks combined, and spread across the region seeding additional outbreaks. There is an ICD code for Ebola, A98.4, but no data used in the modelling reference that coding (ie, all the data are from literature extractions). Data for Ebola virus disease were only included if the case was identified as either “probable” or “confirmed” as per WHO definitions [<http://www.who.int/csr/resources/publications/ebola/ebola-case-definition-contact-en.pdf>]. A confirmed case is any suspected or probable case with a positive laboratory result through either detection of virus RNA via reverse transcriptase-polymerase chain reaction, or by detection of IgM antibodies directed against Ebola. A probable case is any suspected case evaluated by a clinician or any deceased suspected case with an epidemiological link to a confirmed case.

## Input data

### *Model inputs*

Two distinct sequelae were assigned to Ebola virus disease (EVD) to be incorporated into the YLD estimation process: (i) sequela associated with the initial symptomatic phase of the infection (associated with all cases of Ebola virus disease) and (ii) sequela characterizing the long-term post-EVD consequences of infection. As such, data were required both to ascertain the number of deaths as well as those surviving from each outbreak.

Data on fatal cases were inherited from the GBD 2016 mortality estimation process and were converted into incidence of cases of Ebola (with fatal outcomes) by cross-referencing locational annualized population estimates.

In order to calculate the numbers of survivors from each outbreak, two data sources were referenced, one based upon modelled estimates of the main three countries in the West African Ebola outbreak (namely Sierra Leone, Liberia, and Guinea), supplemented by WHO Situation Reports covering the clusters of 2016 cases and literature references covering all other subsequent outbreaks.

Researchers from Imperial College London (UK), as part of the WHO Ebola response team, provided modelled estimates for the number of fatalities that result from a given number of reported cases (provided by line lists from WHO). This method was used in a variety of papers to generate baseline estimates of case fatality rates and other key epidemiological measures while correcting for the lag period between initially reporting a case and the final outcome of that case (whether it be death or survival). The full data cleaning and methodology are reported elsewhere.<sup>1,2</sup> Bespoke estimates were provided for GBD for Liberia, Sierra Leone, and Guinea and were stratified by age, sex, and year. Death data from Guinea ranged from February 28, 2014, until September 27, 2015, with data from Liberia ranging from March 20, 2014, to May 4, 2015, and data from Sierra Leone ranging from May 21 until September 28, 2015. To these estimates, calculated case fatality ratios<sup>1,2</sup> were applied in order to generate an estimate of the total number of cases stratified by age, sex, and country.

For all other outbreaks, numbers of survivors were directly evaluated based upon numbers published in a previous review<sup>3,4</sup> and consulting original documents describing these outbreaks. This initial review was also updated to include the outbreak that occurred in the Democratic Republic of the Congo in 2014,<sup>5</sup> and

cases in 2016. This resulted in datasets describing each outbreak with variable degrees of detail: some fully describing the age and sex breakdown of all survivors [eg, Rosello et al.<sup>6</sup>] and others simply providing the final total. Only confirmed or probable cases were included as per the case definition. Outbreaks that spanned multiple years, in the absence of sufficient data providing an accurate breakdown, were apportioned between the years by evenly assigning a uniform number of survivors to each month of the outbreak's duration. An additional search was conducted to identify imported cases from the West African outbreak during 2014 and 2015.

**Table 1. Sequelae and disability weights (DWs) associated with Ebola**

| Sequelae                                                                            | Description                                                                                        | Disability weight   |
|-------------------------------------------------------------------------------------|----------------------------------------------------------------------------------------------------|---------------------|
| Infectious disease, acute episode, severe                                           | Has a high fever and pain and feels very weak, which causes great difficulty with daily activities | 0.133 (0.088–0.19)  |
| Infectious disease, post-acute consequences (fatigue, emotional lability, insomnia) | Is always tired and easily upset. The person feels pain all over the body and is depressed         | 0.219 (0.148–0.308) |

It was not possible to create bespoke disability weights for the more specific sequelae often associated with Ebola virus disease (eg, haemorrhaging or ocular complications in survivors), so existing disability weights were co-opted. General high fevers and weakness characterize the majority of presenting cases<sup>7</sup> with long-term complications generally related to weakness and arthralgia.<sup>8</sup>

### Modelling strategy

Data on cases (both survivors and fatalities) resulting from imported cases from 2014 and 2015 were used as specific count data as it was assumed to be an accurate representation of the cases and outbreaks in these countries, all of which were on high alert for importation of cases.<sup>9,10</sup>

The other input data were processed prior to inclusion in GBD to account for any potential underreporting of deaths. A meta-analysis of existing underreporting studies from the literature was performed, using a random effects model with a DerSimonian-Laird estimator. A variety of sources were included, capturing a number of different estimation processes, all identified by literature review. The figure below shows the different effect sizes of the different studies, as well as the resulting GBD 2016 correction factor, with the GBD 2015 correction factor for reference. The correction factor ranged from 1.5147 to 2.5720 with a mean of 2.0433.

## Underreporting of Ebola case data

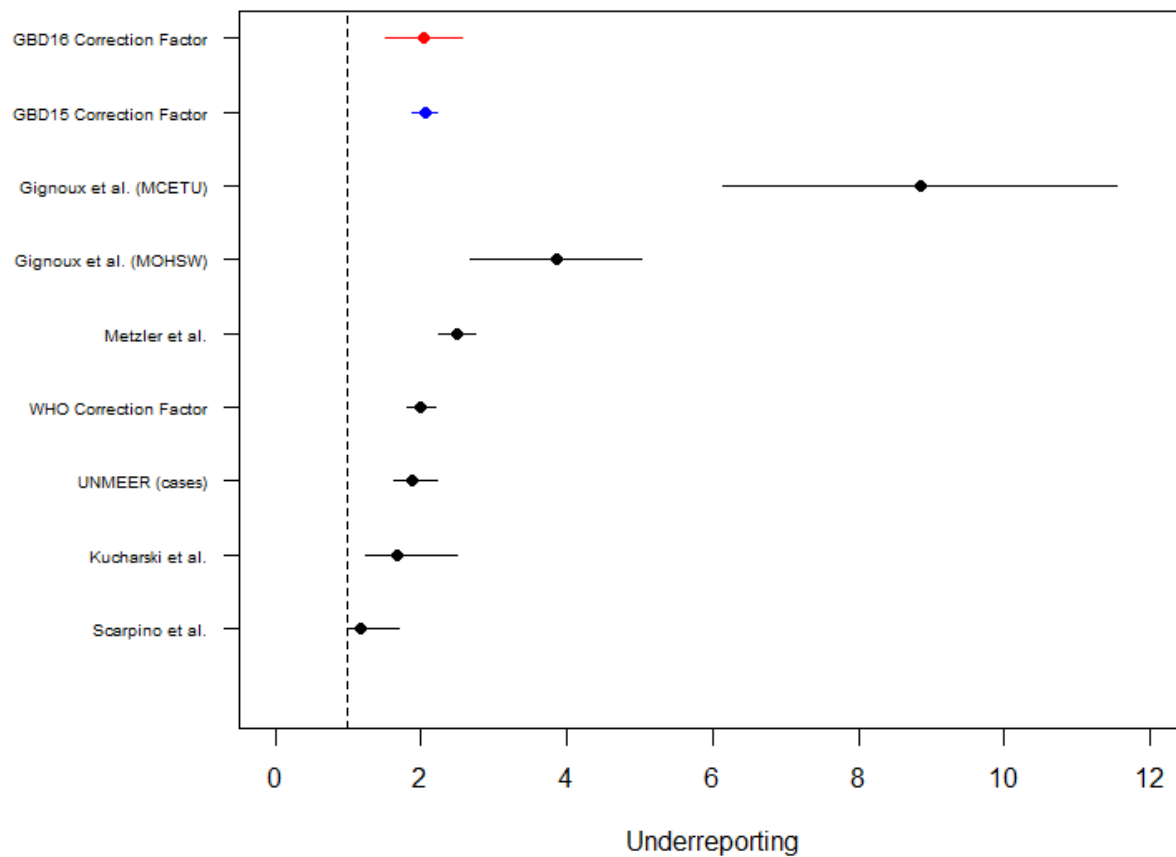

In order to capture this potential variation, all input data were multiplied by the lower and upper limit of this estimated correction factor; these numbers then provided the lower and upper bounds from which draw values were taken. For outbreaks where no data were supplied for age and/or sex, the pattern observed in the West African outbreak (for which there were the most comprehensive data) was used to apportion these total values.

One thousand draws were taken from a normal distribution fitted between these lower and upper bound values, which generated mean estimates stratified by age, sex, location, and year along with credible intervals for these numbers. For the West African outbreak, this generated total case numbers, from which the estimated number of deaths was subtracted in order to provide an estimate for the total number of survivors. For all other outbreaks, this data processing directly estimated the total number of survivors from each outbreak. These count data were converted into prevalence estimates by cross-referencing estimates of population size.

In order to estimate the duration of the sequelae categories, previous modelled assessments of the West African outbreak were consulted.<sup>1,2</sup> The duration of initial infection for patients was calculated as the total time period between onset of symptoms to death or to discharge from hospital (8.2 days [7.9–8.4] and 15.1 [14.6–15.6], respectively). These time periods were assumed to be appropriate for

characterizing all other outbreaks. This time period was then assigned a disability weight corresponding to “infectious disease, acute episode, severe.”

For long-term sequelae estimation, the proportion of survivors still suffering post-acute consequences was modelled using an exponential function with proportions of survivors still reporting poor health states (derived from a number of survivor studies<sup>8,12–21</sup>) reported over different time periods. The average duration of post-Ebola sequelae was then calculated as 0.9042 years (0.3673–1.4268).

The final combination of YLDs associated with prevalent initial onset of disease and prevalent post-EVD consequences was then calculated to provide an overall YLD estimate stratified by age, sex, location, and year. Estimates were provided for the years 1990, 1995, 2000, 2005, 2010, 2015, and 2016 as per non-fatal GBD estimation protocols.

### Potential limitations

Data on Ebola outbreaks prior to 2014 are sparse, and as a result many values derived from the West African outbreak were assumed to be valid for historic outbreaks as well. This may mask significant differences that exist between these outbreaks, some of which were caused by different species of Ebola virus. In order to minimize this problem we chose to implement a data-driven approach – for those outbreaks where sufficiently detailed historical data could be obtained, this was used in preference to any assumed age/sex breakdown.

Haemorrhagic manifestations are currently not considered as an explicit health state for disability weighting, and as a result, the current classification (of infectious disease, acute episode, severe) may be an underestimate. In contrast, the post-Ebola disease sequelae disability weighting may overestimate this burden, particularly when applied over a long period of time. In both instances, however, these disability weightings represent the most relevant linkages in the absence of bespoke values being generated.

Due to so few historical survivors of Ebola virus disease, only a handful of studies have tracked the long-term sequelae among cohorts of survivors beyond a two-year period. Given the large number of survivors from the West African outbreak, it is likely that future parameterization of this component will become much better data-driven. The current log-linear regression model extends for a period of 20 years and therefore could prove to be an overestimate of duration. In addition, ocular manifestations are not currently considered within the sequelae envelope – future iterations will consider health states such as “Distance vision, severe impairment: has severe vision loss, which causes difficulty in daily activities, some emotional impact (for example worry), and some difficulty going outside the home without assistance.”

### References

- 1 Agua-Agum J, Ariyaratna A, Aylward B, *et al.* West African Ebola Epidemic after One Year — Slowing but Not Yet under Control. *N Engl J Med* 2015; **372**: 584–7.
- 2 Ebola Virus Disease in West Africa - The First 9 Months of the Epidemic and Forward Projections. *N Engl J Med* 2014; **371**: 1481–95.
- 3 Pigott DM, Golding N, Mylne A, *et al.* Mapping the zoonotic niche of Ebola virus disease in Africa. *Elife* 2014; **3**: e04395.
- 4 Mylne A, Brady OJ, Huang Z, *et al.* A comprehensive database of the geographic spread of past human Ebola outbreaks. *Sci Data* 2014; **1**: 140042.

- 5 Maganga GD, Kapetshi J, Berthet N, *et al.* Ebola virus disease in the Democratic Republic of Congo. *N Engl J Med* 2014; **371**: 2083–91.
- 6 Rosello A, Mossoko M, Flasche S, *et al.* Ebola virus disease in the Democratic Republic of the Congo, 1976–2014. *Elife* 2015; **4**. DOI:10.7554/eLife.09015.
- 7 Schieffelin JS, Shaffer JG, Goba A, *et al.* Clinical Illness and Outcomes in Patients with Ebola in Sierra Leone. *N Engl J Med* 2014; **371**: 2092–100.
- 8 Tiffany A, Vetter P, Mattia J, *et al.* Ebola Virus Disease Complications as Experienced by Survivors in Sierra Leone. *Clin Infect Dis* 2016; **62**: 1360–6.
- 9 Fasina FO, Shittu A, Lazarus D, *et al.* Transmission dynamics and control of Ebola virus disease outbreak in Nigeria, July to September 2014. *Euro Surveill* 2014; **19**: 20920.
- 10 Althaus CL, Low N, Musa EO, Shuaib F, Gsteiger S. Ebola virus disease outbreak in Nigeria: Transmission dynamics and rapid control. *Epidemics* 2015; **11**: 80–4.
- 11 UNMEER. Sierra Leone: Ebola emergency Weekly Situation Report No. 7. 2014  
[https://www.humanitarianresponse.info/system/files/documents/files/UNMEER\\_NERC\\_SitRep\\_07Dec.pdf](https://www.humanitarianresponse.info/system/files/documents/files/UNMEER_NERC_SitRep_07Dec.pdf).
- 12 Clark D V, Kibuuka H, Millard M, *et al.* Long-term sequelae after Ebola virus disease in Bundibugyo, Uganda: a retrospective cohort study. *Lancet Infect Dis* 2015; **15**: 905–12.
- 13 Qureshi AI, Chughtai M, Loua TO, *et al.* Study of Ebola Virus Disease Survivors in Guinea. *Clin Infect Dis* 2015; **61**: 1035–42.
- 14 Rowe AK, Bertolli J, Khan AS, *et al.* Clinical, virologic, and immunologic follow-up of convalescent Ebola hemorrhagic fever patients and their household contacts, Kikwit, Democratic Republic of the Congo. Commission de Lutte contre les Epidémies à Kikwit. *J Infect Dis* 1999; **179 Suppl**: S28-35.
- 15 Bwaka MA, Bonnet MJ, Calain P, *et al.* Ebola hemorrhagic fever in Kikwit, Democratic Republic of the Congo: clinical observations in 103 patients. *J Infect Dis* 1999; **179 Suppl**: S1-7.
- 16 Mohammed H, Vandy AO, Stretch R, *et al.* Sequelae and Other Conditions in Ebola Virus Disease Survivors, Sierra Leone, 2015. *Emerg Infect Dis* 2017; **23**: 66–73.
- 17 Nanyonga M, Saidu J, Ramsay A, Shindo N, Bausch DG. Sequelae of Ebola Virus Disease, Kenema District, Sierra Leone. *Clin Infect Dis* 2016; **62**: 125–6.
- 18 Mattia JG, Vandy MJ, Chang JC, *et al.* Early clinical sequelae of Ebola virus disease in Sierra Leone: a cross-sectional study. *Lancet Infect Dis* 2016; **16**: 331–8.
- 19 Epstein L, Wong KK, Kallen AJ, Uyeki TM. Post-Ebola Signs and Symptoms in U.S. Survivors. *N Engl J Med* 2015; **373**: 2484–6.
- 20 Etard J-F, Sow MS, Leroy S, *et al.* Multidisciplinary assessment of post-Ebola sequelae in Guinea (Postebogui): an observational cohort study. *Lancet Infect Dis* 2017. DOI:10.1016/S1473-3099(16)30516-3.
- 21 Scott JT, Sesay FR, Massaquoi TA, Idriss BR, Sahr F, Semple MG. Post-Ebola Syndrome, Sierra Leone. *Emerg Infect Dis* 2016; **22**: 641–6.

# Zika

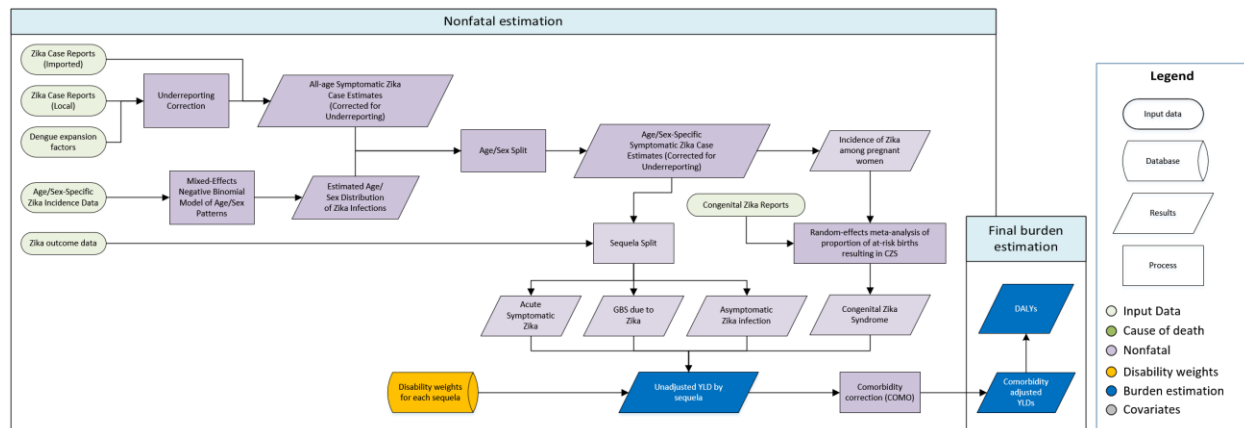

## Input data

Data on cases of acute Zika and Congenital Zika Syndrome (CZS) come from official reports, primarily from PAHO.

## Modeling strategy

We estimate the all-age incidence of symptomatic Zika as the product of reported Zika cases and country-specific expansion factors that adjust for underreporting. Those expansion factors are derived from our dengue model and the methods used for their estimation are detailed in the dengue model documentation and by Stanaway et al.(1) A subset of incidence data were age/sex-specific, and we used a mixed-effects negative binomial model with cubic splines on age and interaction terms with sex to estimate the age/sex distribution of cases. We then split total incidence based on the age/sex-distribution model to estimate the incidence of symptomatic Zika by location, year, age, and sex.

We conducted a meta-analysis of three studies(2–4) to estimate the proportion of all Zika infections that are symptomatic. We estimate that 41% of Zika infections are symptomatic (14 – 68%), with 59% being asymptomatic. We then estimated incidence of asymptomatic infections as,

$$I_{asympt} = \frac{I_{symp}}{Pr_{symp}} - I_{symp}$$

Where  $I_{asympt}$  is the incidence of asymptomatic infections,  $I_{symp}$  is the incidence of symptomatic Zika, and  $Pr_{symp}$  is the proportion of infections that are symptomatic (i.e. 41%).

We assume that the incidence of Zika among pregnant women equals the incidence of Zika among all women, within a given location, year, and age group. We then estimate the number of pregnant women infected with Zika as the product of incidence of Zika and the number of pregnant women in every location, year, and age group. Finally, we used an intercept only, mixed-effects Poisson regression model, with random effects on location, the number of at-risk births as the exposure term, and the

number of reported CZS cases as the outcome to estimate proportion of at-risk births (i.e. those in which the mother was infected with Zika during pregnancy) resulting in CZS.

## Changes from GBD 2015 to GBD 2016

Zika is a new cause for GBD 2016.

## References

1. Stanaway JD, Shepard DS, Undurraga EA, Halasa YA, Coffeng LE, Brady OJ, et al. The global burden of dengue: an analysis from the Global Burden of Disease Study 2013. *Lancet Infect Dis* [Internet]. 2016 Feb [cited 2016 May 23]; Available from: <http://linkinghub.elsevier.com/retrieve/pii/S1473309916000268>
2. Gallian P, Cabié A, Richard P, Paturel L, Charrel RN, Pastorino B, et al. Zika virus in asymptomatic blood donors in Martinique. *Blood*. 2017 Jan 12;129(2):263–6.
3. Duffy MR, Chen T-H, Hancock WT, Powers AM, Kool JL, Lanciotti RS, et al. Zika virus outbreak on Yap Island, Federated States of Micronesia. *N Engl J Med*. 2009 Jun 11;360(24):2536–43.
4. Aubry M, Teissier A, Huart M, Merceron S, Vanhomwegen J, Roche C, et al. Zika Virus Seroprevalence, French Polynesia, 2014–2015. *Emerg Infect Dis*. 2017 Apr;23(4):669–72.

## Dracunculiasis (Guinea worm) Appendix

### Guinea Worm

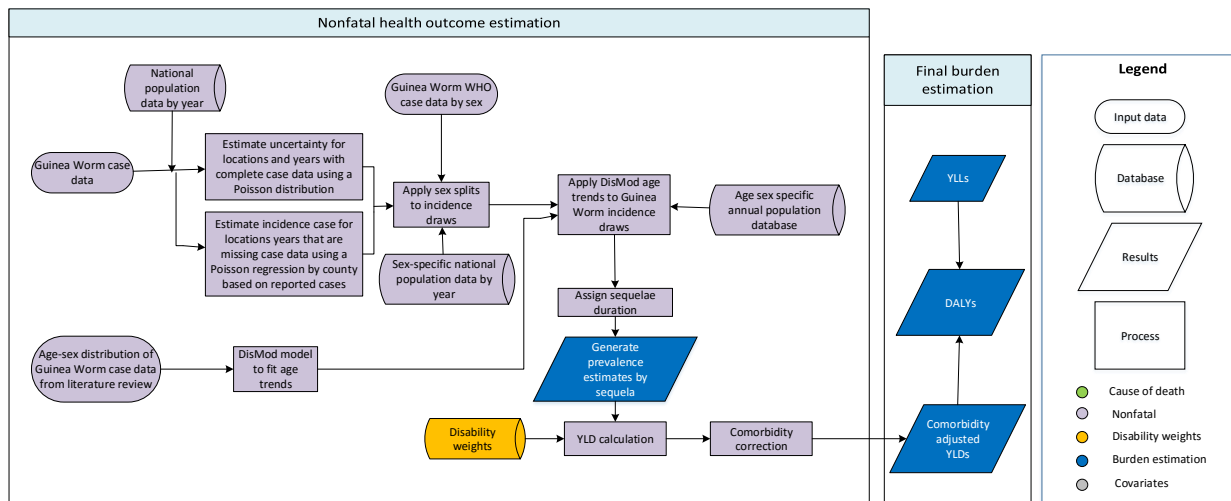

## Background

Guinea-worm disease is caused by the parasitic worm *Dracunculus medinensis*. The transmission cycle begins when Guinea worm larvae are released in stagnant water (e.g., ponds, lakes, open wells) where they are ingested by freshwater copepods (small crustaceans sometimes called water fleas) of the genus *Cyclops* [1]. When a person consumes water containing *Cyclops*, the copepods are dissolved by gastric acids and intestinal enzymes and the larvae are released. Larvae then migrate through the intestinal wall and travel to the connective tissues. The larvae mature and mate 60–90 days after infection; shortly thereafter, the male dies and the pregnant female worm continues to move through the victim's connective tissues. Approximately 10–14 months post-infection, the adult worm creates a painful burning blister on the skin that develops and enlarges over several days, usually from the feet or lower limbs. Blister formation may be preceded by a slight fever, itchy rash, nausea, vomiting, and diarrhea. To relieve the pain associated with the worm's emergence, infected persons immerse the infected part of their body in local stagnant water sources, such as ponds. Upon entering the water, the female worm will expel her larvae and the cycle can begin again [1-4].

The global campaign to eradicate Guinea worm began in 1980, when the U.S. Centers for Disease Control and Prevention (CDC) suggested that Guinea worm eradication would be an ideal indicator of the success of the International Drinking Water Supply and Sanitation Decade of 1981–1990; in 1981, Guinea worm eradication was adopted as a sub-goal of this United Nations advocacy effort [1, 5]. In 1986, the World Health Assembly adopted a resolution to eliminate Guinea worm disease and since then The Carter Center has led a coalition that includes ministries of health of endemic countries, CDC, the World Health Organization (WHO), the United Nations Children's Fund (UNICEF), thousands of village volunteers and supervisory staff supported by numerous donors [5].



To break the cycle of transmission, ministries of health in endemic countries implement a suite of interventions: case detection and containment; provision of safe water sources; distribution of filter cloths and pipe filters; water source treatment with Abate® (a larvicide) and health education.

By design, the Guinea worm eradication programmatic infrastructure covers the entire at-risk population in endemic countries. Since case containment[6] is a key intervention designed to not only interrupt transmission but also monitor progress towards eradication, incident cases of guinea worm disease are nationally representative. To implement case containment as an intervention, all cases of Guinea worm disease are identified. Containment is defined as: detection within 24 hours of the worm's emergence; the patient did not contaminate any water source; the patient received proper wound care and health education on not entering any water source; a supervisor verified the case as dracunculiasis within 7 days; and Abate® is used if there is any uncertainty about contamination of water sources or known contamination of water sources [7]. Case reporting occurs at the village level on a monthly basis; case data are then aggregated within the national Guinea Worm Eradication Program and reported to the World Health Organization. In settings where annual case reports are low (suggesting no transmission) or transmission has been interrupted, cash rewards are promoted to enhance surveillance activities.

## Input Data & Methodological Summary

### Case Definition

A Guinea worm case is defined as an individual with Guinea worm disease. A person is counted as a case only once in a calendar year, i.e., when the first Guinea worm emerged from that person, although an individual may have more than one worm emerge at a time and/or more than one worm emerge during the year. These cases are confirmed through the Guinea worm eradication program infrastructure by clinical exam and verification by local supervisors. All specimens from all case-patients are sent to the U.S. Centers for Disease Control and Prevention (CDC) for laboratory evaluation and confirmation [7].

### Input data

#### *Model inputs*

#### *Geographic restrictions*

Only the following countries were identified as guinea-worm endemic as of 1990[8]: Benin, Burkina Faso, Cameroon, Central African Republic, Chad, Cote d'Ivoire, Ethiopia, Ghana, India, Kenya, Mali, Mauritania, Niger, Nigeria, Pakistan, Senegal, Sudan, South Sudan, Togo, Uganda, and Yemen[8]. Any country not reporting Guinea worm in 1990 is not included in the GBD model.

Geographic restrictions by year were also implemented to account for the period post-transmission to reflect the accomplishments of the Guinea worm eradication campaign. Geographic restriction for countries that were endemic in 1990 was defined based on data reported post-interruption of transmission. In the GBD analysis, Guinea worm disease was no longer modeled for the year that followed the last reported case (imported or indigenous) provided that the subsequent years through 2015 also had no case reports. To ensure that cases were attributed to burden in the country in which the case was detected, both indigenous and imported cases were included. For example, Kenya reported its last (imported) case in 2005, and as no other cases were reported through 2015, incidence

from 2006 onwards is zero. For Chad, a country that had years during which no cases were reported, the model covers the entire period 1990-2015.

#### *Data sources*

- 1) Case data by location, by year
- 2) Literature review of age/sex distribution
- 3) Literature review for sequelae (type, duration and proportion)

**Case data:** Annual case data were reported by the WHO in the Weekly Epidemiological Record. For years or locations for which WER reports were not published, the following sources were also used to extract case counts:

- 1) CDC's MMWR reports
- 2) 1990-1999 total country reports from Hopkins *et al*[8]
- 3) India subnational estimates: India MOH report (1984-1999)
- 4) The Carter Center's Guinea worm wrap-up: disaggregation of case totals for Sudan and South Sudan pre-2011 (independence) to ensure case totals from 1990-2010 are consistent with current national boundaries; 2016 provisional case data.

The number of cases annually was compared to official total numbers published in WER 2016 to ensure accuracy of data entry.

#### *Subnational data*

India: Subnational data for India was obtained from the Ministry of Health for the period 1984-1999; cases were reported by year and state: <http://www.ncdc.gov.in/index2.asp?slid=329&sublinkid=216>

Kenya: Subnational data from Kenya was requested from the MOH but not obtained. To split cases by subnational unit, the Carter Center Guinea Worm Wrap Up was reviewed to identify districts with endemic villages. A national survey conducted 1993/1994 found cases in Turkana and West Pokot counties, but case totals were not reported by county. Indigenous transmission was interrupted in 1995, with imported cases reported until 2005. WER reports from 1999-2006 document that all imported cases from 1998-2005 occurred in Turkana County. All cases in Kenya are currently analyzed in GBD as occurring in Turkana County as we are unable to disaggregate the data.

#### *Accounting for possible under-reporting*

Once national eradication programs were initiated, national case searches were conducted to improve the accuracy of national case estimates. These searches were designed to enumerate prevalent Guinea worm disease cases and identify endemic villages to direct intervention and surveillance activities. For the majority of years included in the GBD analysis, the total number of Guinea worm cases reported is equivalent to a national census, as all cases are identified and reported. Nevertheless, not all endemic countries were able to initiate full national surveillance as of 1990. National case searches began as follows: India (1980); Pakistan (1987); Cameroon and Nigeria (1988); Ghana (1989); Benin, Burkina Faso, Central African Republic, Côte d'Ivoire and Togo (1990); Niger, Mauritania, Mali, Senegal, Uganda and Yemen (1991); Ethiopia and Sudan (1992); and Chad and Kenya (1993). By 1995, all endemic countries had begun implementing case-containment strategies[2].

The model does not account for the possibility that cases occurred in communities that were not included in routine surveillance or did not achieve 100% reporting coverage over time. However, any cases that may have been undetected would likely not have been a significant increase over annual totals given the comprehensive nature of Guinea worm disease surveillance activities. Nevertheless, there are years for which the annual case data is inconsistent with preceding/following annual case totals and could not be accounted for in our model. For example, Niger reported 500 cases in 1992, despite reporting 32,829 cases in 1991 and 25,346 cases in 1993. In those instances, the following data points were identified as outliers and excluded from analysis as follows:

*Table 1. List of reported case data outliered in the analysis to account for possible under-reporting*

| Country                  | Year | Reported Cases |
|--------------------------|------|----------------|
| Central African Republic | 1996 | 9              |
| Central African Republic | 1997 | 5              |
| Ethiopia                 | 1992 | 303            |
| Kenya (Turkana County)   | 1990 | 6              |
| Uganda                   | 1990 | 4,704          |
| Uganda*                  | 1992 | 126,369        |
| Benin                    | 1991 | 4,006          |
| Benin                    | 1992 | 4,315          |
| Chad                     | 1992 | 156            |
| Cote d'Ivoire            | 1990 | 1,360          |
| Mali                     | 1990 | 884            |
| Mauritania               | 1992 | 1,557          |
| Niger                    | 1992 | 500            |
| Senegal                  | 1990 | 38             |
| Togo                     | 1990 | 3,042          |
| Togo                     | 1991 | 5,118          |
| South Sudan*             | 1996 | 116,844        |
| Sudan                    | 1994 | 132            |

\*For these two data points, we do not dispute that over 100,000 cases of Guinea worm likely occurred. However, given the amount of missing data in the early time series for these two countries, inclusion of these resulted in implausibly high case predictions (over 1 million cases in Uganda in 1990 and over 1.5 million for South Sudan from 1990-1995).

### *Age/Sex distribution*

Generally, the risk of Guinea worm infection varies according to sex or age-specific differences in access to safe drinking water. A study in Ethiopia found women were more likely to experience Guinea worm disease than men; in India, men experienced greater risk of infection [1]. Exposure to unsafe water sources varies largely on mobility patterns and type of water sources: communities in which infected

water is carried in for consumption are more likely to see more Guinea worm disease in children and older adults [9]. Once interventions to control the spread of Guinea worm infection are implemented, the age and sex distribution likely changes to reflect variation in coverage and uptake of eradication interventions, such as larvacide of water sources and case-containment rates; age/sex case data are currently not available.

The evidence base available to describe risk of infection by age is as follows:

- 1) Studies from Nigeria:
  - a. Adeyeba *et al* [10]: Guinea worm disease not common among children <1 year of age; increase in risk by age
  - b. Kale *et al* [11]: More boys ages 5-9 years than girls were infected (11.9% v. 6.8%); Women ages 20-29 years had higher prevalence of infection than men (13.4% v. 4.7%); Overall, the prevalence in both men and women was highest in ages 10-14 years and 30 years or older.
  - c. Greenwood *et al* [12]: The mean age of male cases was 25.8 years (95% CI: 23.9, 27.7) and 26.9 years for females (95% CI: 23.7, 30.1).
- 2) Other countries:
  - a. Sudan [13]: No significant age trend among lower-endemicity villages, higher endemicity villages (n=4) had higher prevalence in children and older adults. This study attributes the difference in age trends to community-level water source.
  - b. Ghana [14]: The trend in age of first infection reported was similar for males and females, with more females experiencing first infection between 15-19 years and males between 20-24 years of age. The proportion of men with Guinea worm disease was much higher than women among ages 25-54 years of age. Adults >15 years of age were more likely to be infected than children.

The evidence base available to describe the risk of infection by gender is as follows:

- 1) Studies from Nigeria:
  - a. Adeyeba *et al* [10]: No difference among males and female
  - b. Kale *et al* [11]: No overall gender difference comparing total males infected to total females infected, although gender differences for certain age groups (see notes above).
  - c. Greenwood *et al* [12]: Two-thirds of cases reported among 47 villages from 1971-1974 were male.

WHO Weekly Epidemiological Record (WER) age reports: Age and sex data were reported by country for 2009 onwards; these data capture the age distribution for Chad, Ethiopia, Ghana, Mali, and South Sudan. We excluded these data as the age/sex distribution is only described for children <15 years or adults, which does not permit fitting an age trend across multiple categories.

WER sex-specific data: Sex-specific differences in the burden of Guinea worm disease could reflect differing levels of access to eradication program interventions, in addition to risk factors associated with local transmission dynamics. Since the data reported from 2009-2015 are the only available data nationally representative, we used the overall sex difference to generate sex-specific incidence and prevalence, with females experiencing a slightly higher risk (53%) compared to males (47%):

Table 2. WHO Weekly Epidemiological Record total worm burden by gender, by year

| Year         | Female | Male | Total | % Fem | % Male |
|--------------|--------|------|-------|-------|--------|
| 2009         | 1699   | 1490 | 3189  | 53%   | 47%    |
| 2010         | 976    | 821  | 1797  | 54%   | 46%    |
| 2011         | 524    | 534  | 1058  | 50%   | 50%    |
| 2012         | 273    | 269  | 542   | 50%   | 50%    |
| 2013         | 79     | 69   | 148   | 53%   | 47%    |
| 2014         | 63     | 63   | 126   | 50%   | 50%    |
| 2015         | 9      | 13   | 22    | 41%   | 59%    |
| <b>Total</b> | 3623   | 3259 | 6882  | 53%   | 47%    |

There is limited evidence to suggest that risk varies jointly by sex and age; however, evidence for this modification also suggests that such age and sex specific risks may vary by endemic community within a given geography (in some settings, women at higher risk, in others men, but not for all age strata). Without additional data sources in which cases are disaggregated by age and sex, this joint relationship is not modeled.

To model age-specific variation, we used data from seven studies with age-specific case data to generate an age-trend in a Dismod model. We further assumed no Guinea worm disease occurred in infants less than 1 year of age.

#### *Severity splits/sequelae*

Sequelae associated with Guinea worm relate to the wound at the site of the worm's emergence, which can include abscesses and chronic ulcerations. Joint and tissue damage can occur, as well as secondary infection in connective tissues [15]. During the worm's emergence, which takes approximately one month to exit the body, the ulcer is painful and itchy [1]. The wound is subject to secondary infection and scarring. Possible long-term consequences of Guinea worm infection include arthritis or other permanent damage to connective tissues; however, data on this is limited. In the Greenwood study, 41.7% of all cases experienced infection at the site of emergence and the annual proportion of cases with definite arthritis ranged from 1.6% to 7.3% of all cases.

While an individual experiences Guinea worm disease, they are generally unable to work and have limited mobility at the time prior and during emergence and in the subsequent period in which they are healing. Although most worms emerge in the feet and lower legs, there are reports of worms exiting at other sites [15], which could cause other disability not accounted for here. A study in Nigeria found that 98% of worms emerged in the lower limbs[16]. The Greenwood study also observed that 88.4% emerged in the lower limbs. Therefore, for the purposes of estimating the burden of Guinea worm disease in the GBD, all disability associated with Guinea worm disease is attributed to lower limb conditions, pain and lack of mobility. Due to limited data, we cannot account for differential disability based on number of worms emerging at the same time.

The following evidence base was reviewed to determine the proportion of cases attributed to each sequela, as well as duration of sequelae.

Duration of disability and type of disability:

Studies from Nigeria:

- 1) Adeyeba *et al* [10]: 93.4% incapacitated for an average of 26 days
- 2) Smith *et al* [17]: Average disability duration 12.7 weeks; 58% unable to leave the home for a mean duration of 4.2 weeks; duration of disability greater among those older than 50 years compared to those younger than 50 years
- 3) Okoye *et al* [16]: 21% of cases were totally incapacitated due to their infection (not permanently disabled)
- 4) Kate *et al* [11]: A survey of 17 villages from 1971-1975 found that duration of disability was approximately 100 days
- 5) Greenwood *et al* [12]: Weekly visits to 47 villages from 1971-1974 reported mean duration of illness ranging from 4.2 weeks to 7.2 weeks. 17.4% of cases had an active infection which persisted for 10 weeks or more.

Other countries:

- 6) Benin [18]: From two villages in highly endemic areas, estimated that 39-59 days of disability experienced after worm emergence.
- 7) Ghana [19]: 28.2% experienced pain 12-18 months post emergence; 5% unable to carry out at least one daily activity, 0.5% permanently impaired (ligament damage to thumb)
- 8) Ghana [14]: Complete disability experienced among males with Guinea worm disease lasted approximately 5 weeks among those untreated. Among cases provided supportive care (wound management), the duration of disability was 2.5 weeks.

For all cases, we assume each experiences pain and disfigurement (level 2), and musculoskeletal problems lower limb (moderate) for a period of one month, followed by two months of pain and disfigurement (mild). We then assume that 30% of all cases will then experience disfigurement level 1 with itch/pain for an additional 9 months (approximately a year of disability) to account for longer-term disability associated with recovery.

Table 3. Sequela associated with Guinea worm disease in Global Burden of Disease study

| Sequela                                         | Lay description                                                                                                                                                               | DW (95% CI)            |
|-------------------------------------------------|-------------------------------------------------------------------------------------------------------------------------------------------------------------------------------|------------------------|
| Disfigurement, level 2, with itch/pain          | Has a visible physical deformity that is sore and itchy. Other people stare and comment, which causes the person to worry. The person has trouble sleeping and concentrating. | 0.188<br>(0.125-0.267) |
| Disfigurement, level 1, with itch/pain          | Has a slight, visible physical deformity that is sometimes sore or itchy. Others notice the deformity, which causes some worry and discomfort.                                | 0.027<br>(0.015-0.042) |
| Musculoskeletal problems, lower limbs, moderate | Has moderate pain in the leg, which makes the person limp, and causes some difficulty walking, standing, lifting and carrying heavy things, getting up and down and sleeping. | 0.079<br>(0.054-0.11)  |

## Modeling strategy

### Total incidence

The incidence of Guinea worm disease is modeled in GBD using two approaches: for years and locations for which case data were reported, 1,000 draws of incidence were estimated using a beta distribution of cases and total population minus cases. For years and locations for which case data were missing (largely the early 1990s) a Poisson regression of all case data was implemented per country, using the total population as the offset. The predicted incidence and standard error was used to generate a random distribution of 1,000 incidence draws. Incidence is multiplied by duration of sequelae to calculate prevalence. Country-level incidence predictions are shown in the following figures.

GW Incidence (all-age, both-sex),  
Benin (BEN)

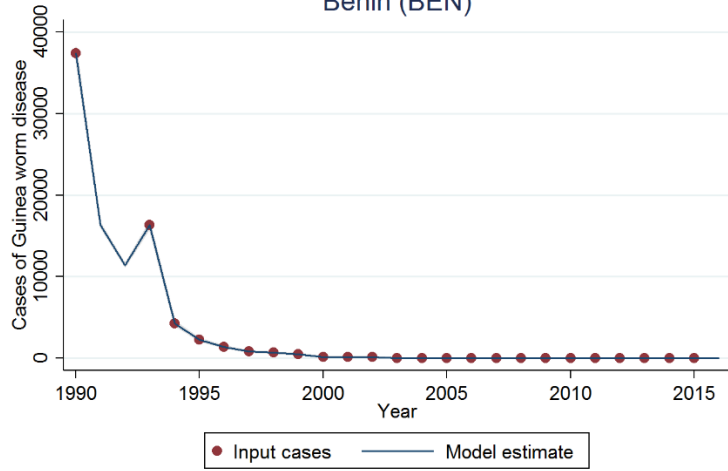

GW Incidence (all-age, both-sex),  
Burkina Faso (BFA)

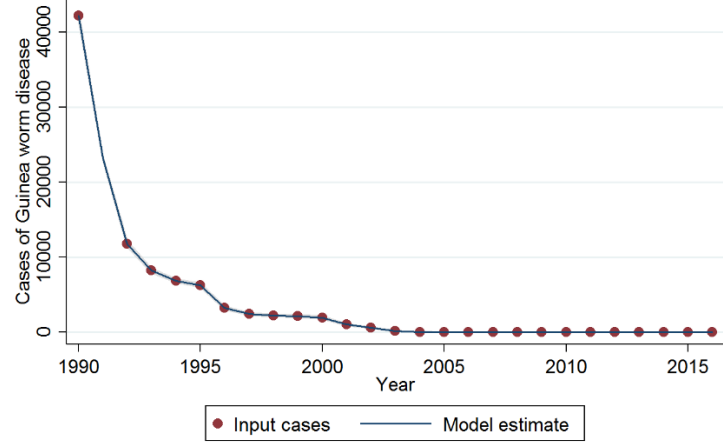

GW Incidence (all-age, both-sex),  
Central African Republic (CAF)

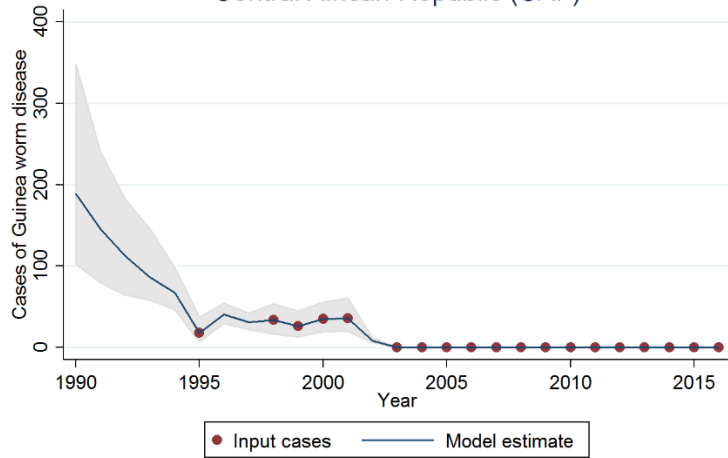

GW Incidence (all-age, both-sex),  
Cote d'Ivoire (CIV)

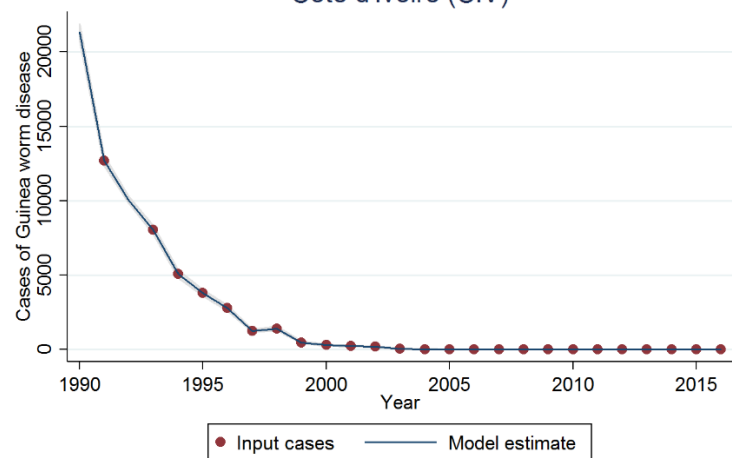



GW Incidence (all-age, both-sex),  
Cameroon (CMR)

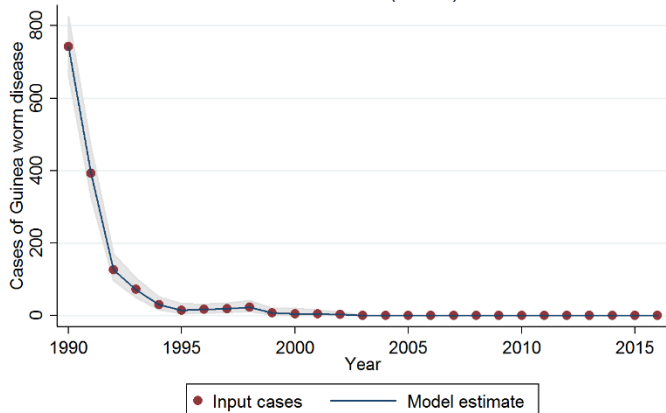

GW Incidence (all-age, both-sex),  
Ethiopia (ETH)

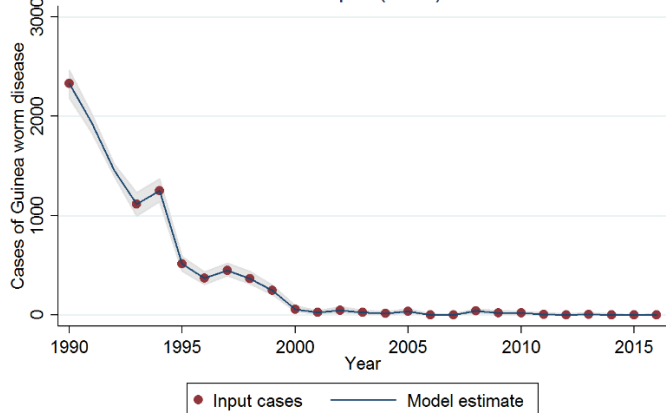

GW Incidence (all-age, both-sex),  
Ghana (GHA)

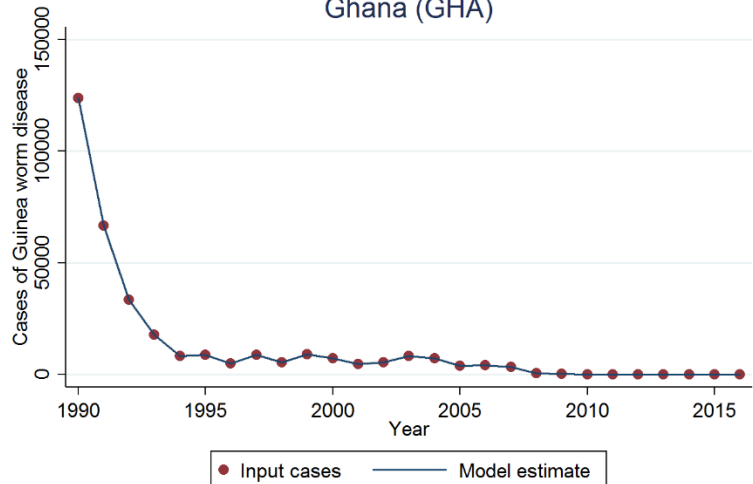

GW Incidence (all-age, both-sex),  
Turkana (KEN\_35659)

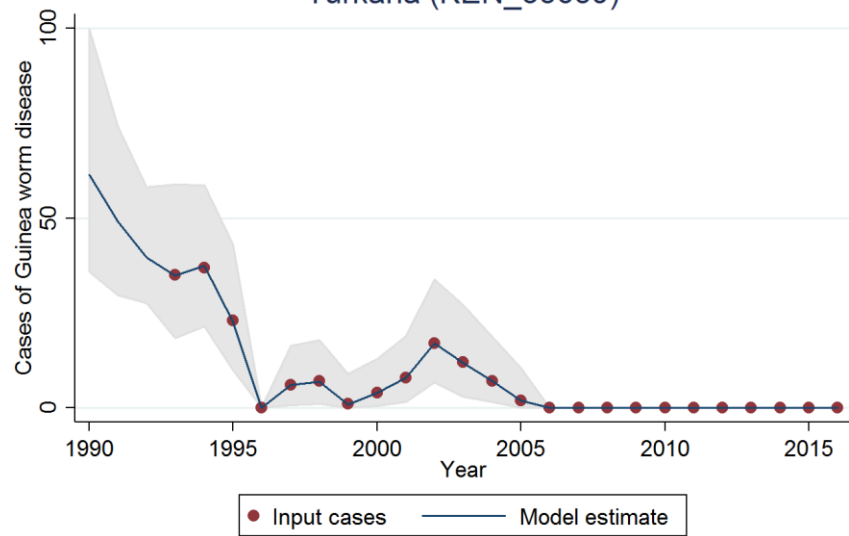

GW Incidence (all-age, both-sex),  
Mali (MLI)

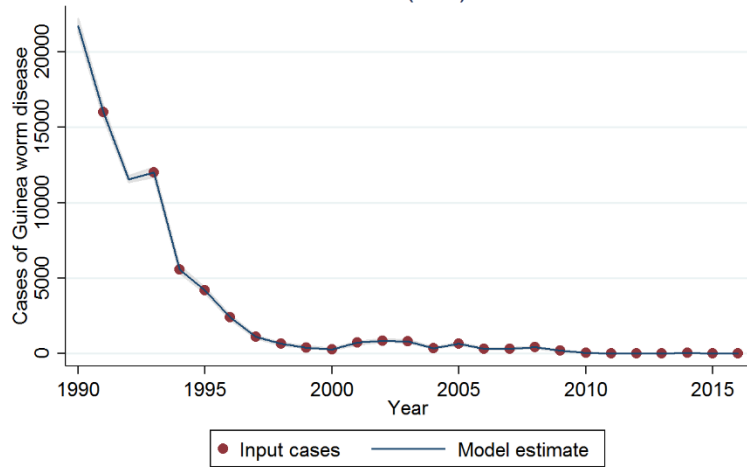

GW Incidence (all-age, both-sex),  
Mauritania (MRT)

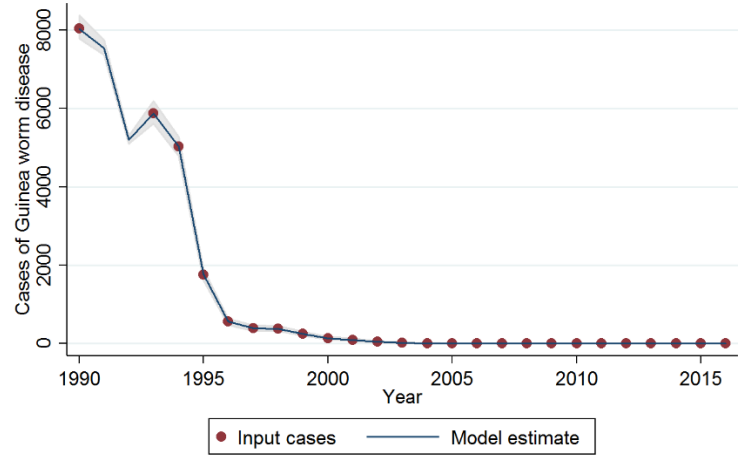

GW Incidence (all-age, both-sex),  
Niger (NER)

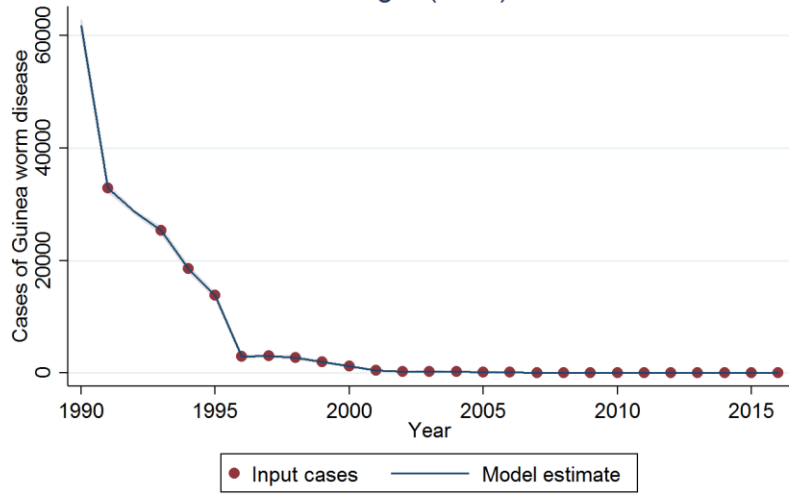

GW Incidence (all-age, both-sex),  
Nigeria (NGA)

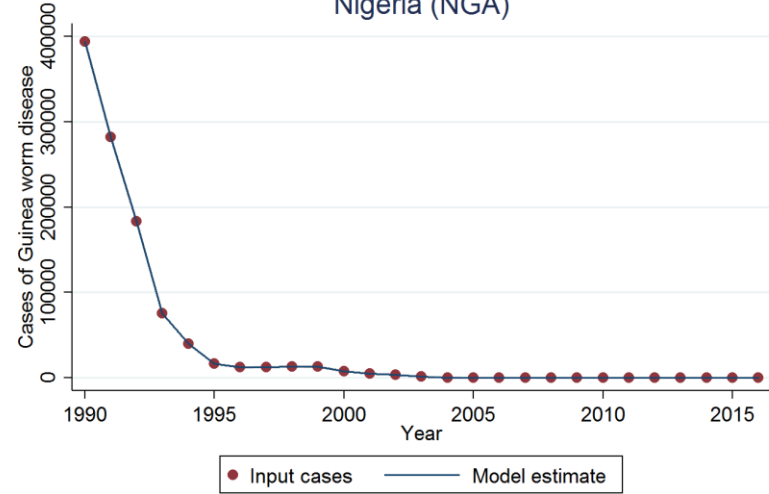

GW Incidence (all-age, both-sex),  
Pakistan (PAK)

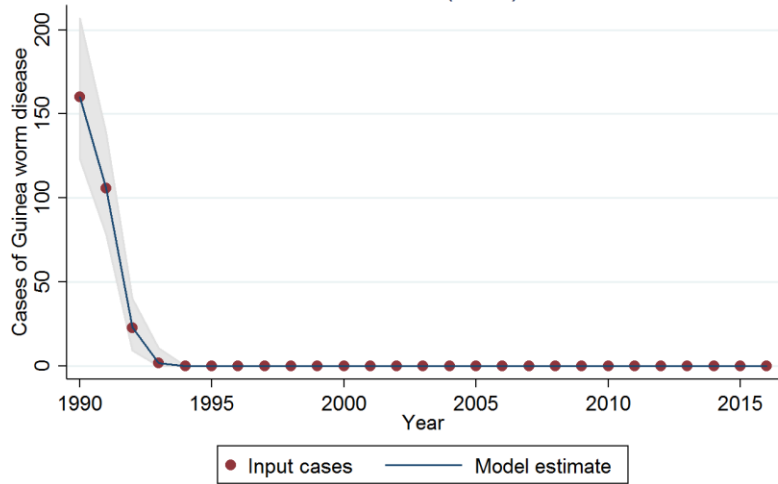

GW Incidence (all-age, both-sex),  
Sudan (SDN)

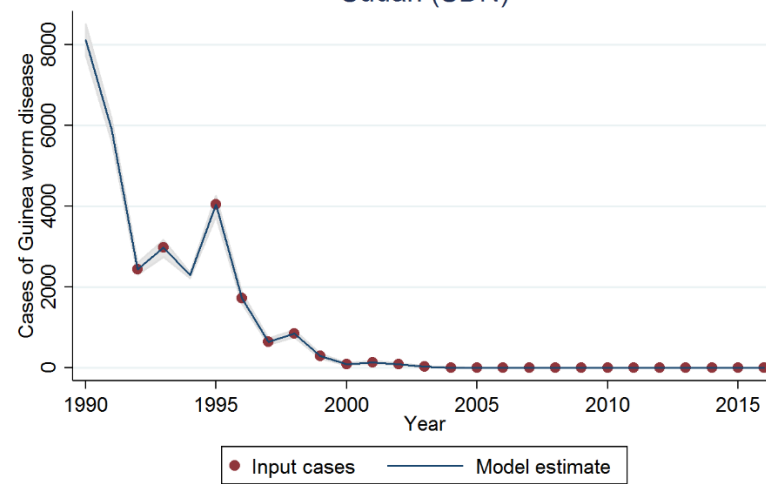

GW Incidence (all-age, both-sex),  
Senegal (SEN)

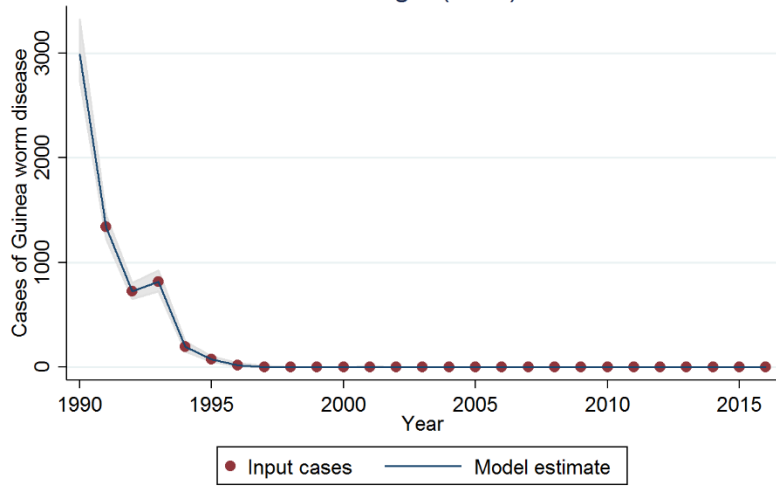

GW Incidence (all-age, both-sex),  
South Sudan (SSD)

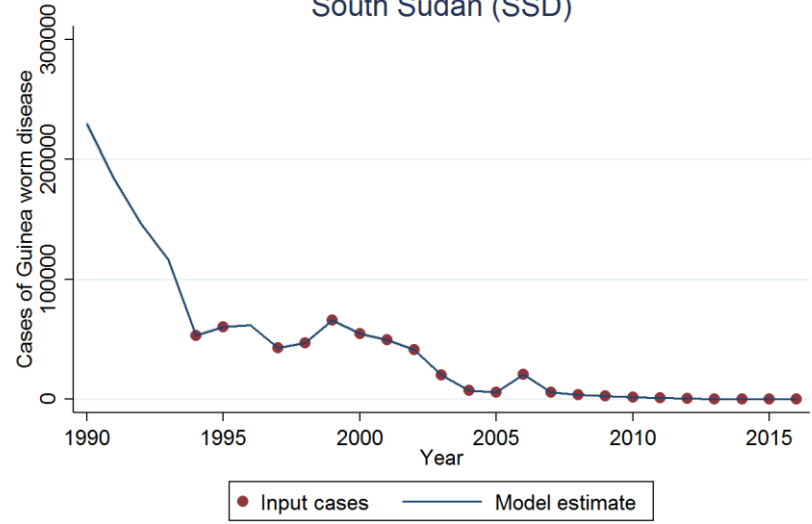

GW Incidence (all-age, both-sex),  
Chad (TCD)

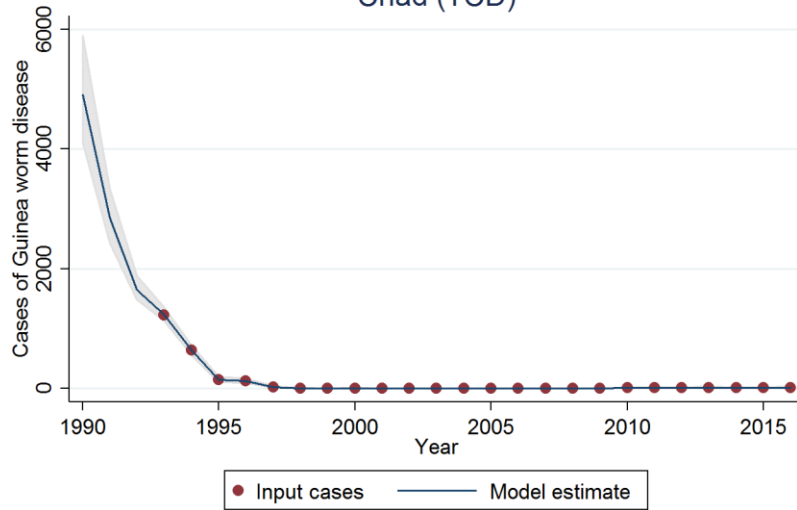

GW Incidence (all-age, both-sex),  
Andhra Pradesh, Rural (IND\_43908)

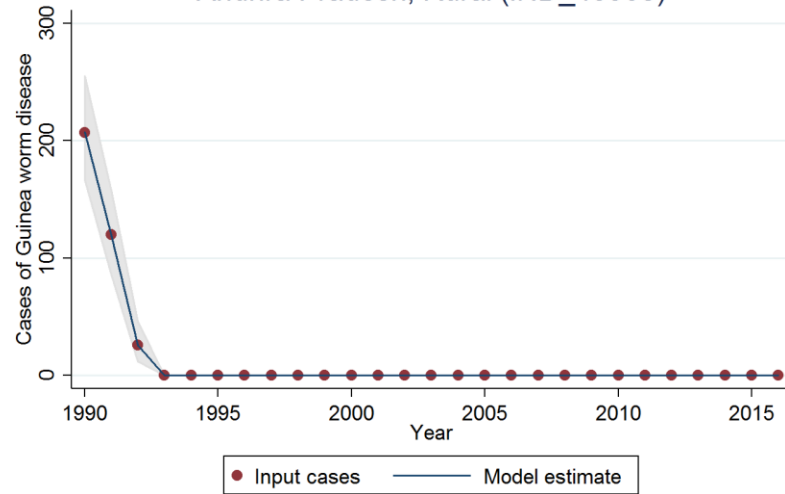

GW Incidence (all-age, both-sex),  
Gujarat, Rural (IND\_43918)

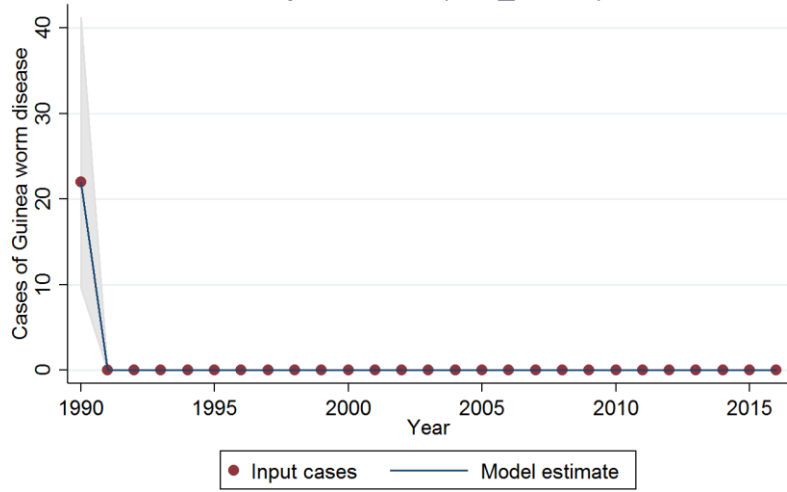

GW Incidence (all-age, both-sex),  
Karnataka, Rural (IND\_43923)

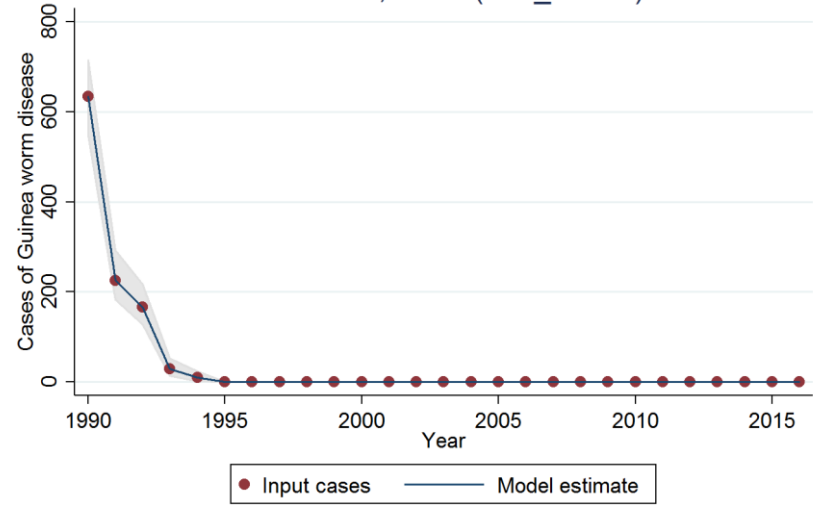

GW Incidence (all-age, both-sex),  
Madhya Pradesh, Rural (IND\_43926)

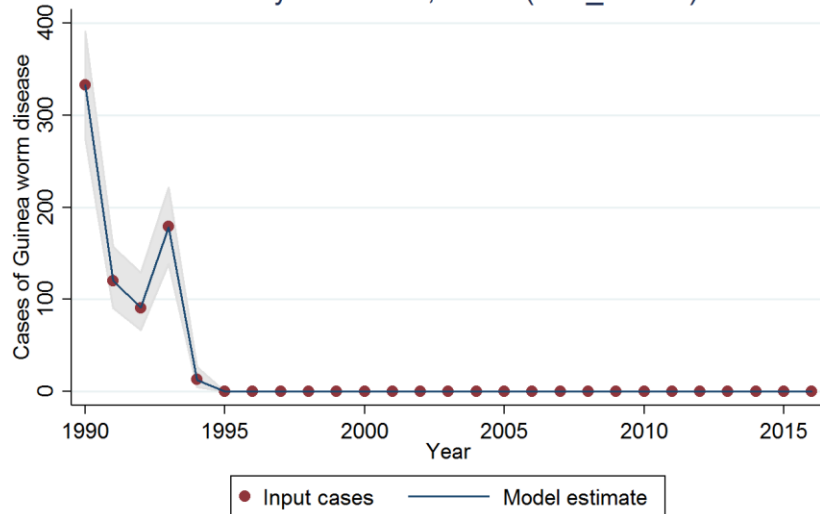

GW Incidence (all-age, both-sex),  
Maharashtra, Rural (IND\_43927)

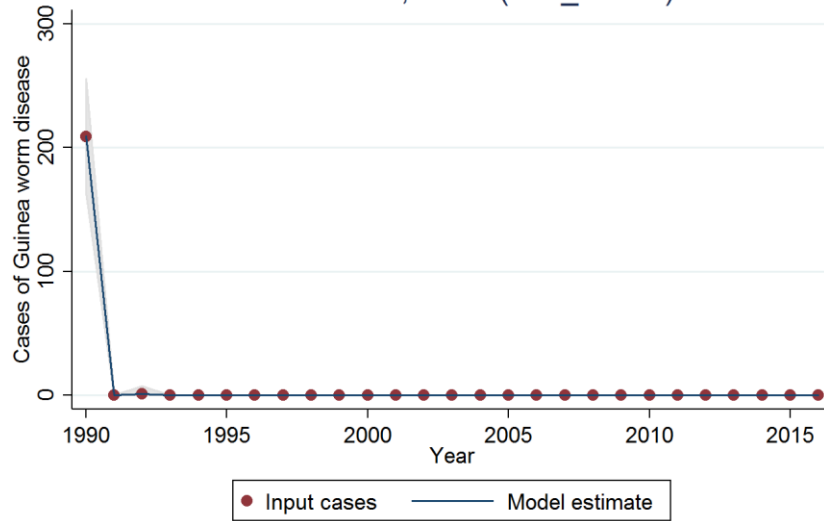

GW Incidence (all-age, both-sex),  
Rajasthan, Rural (IND\_43935)

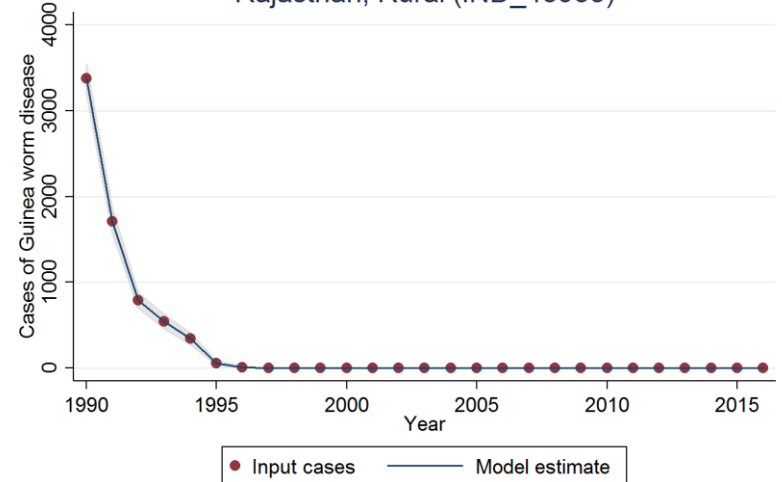

GW Incidence (all-age, both-sex),  
Tamil Nadu, Rural (IND\_43937)

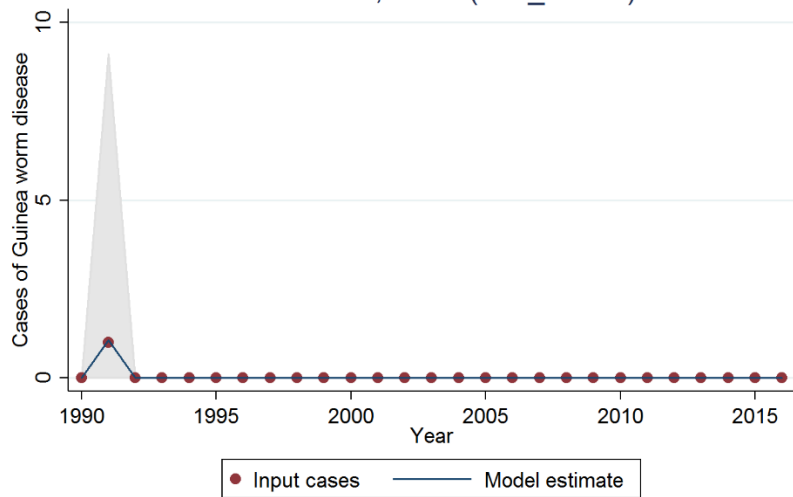

GW Incidence (all-age, both-sex),  
Telangana, Rural (IND\_43938)

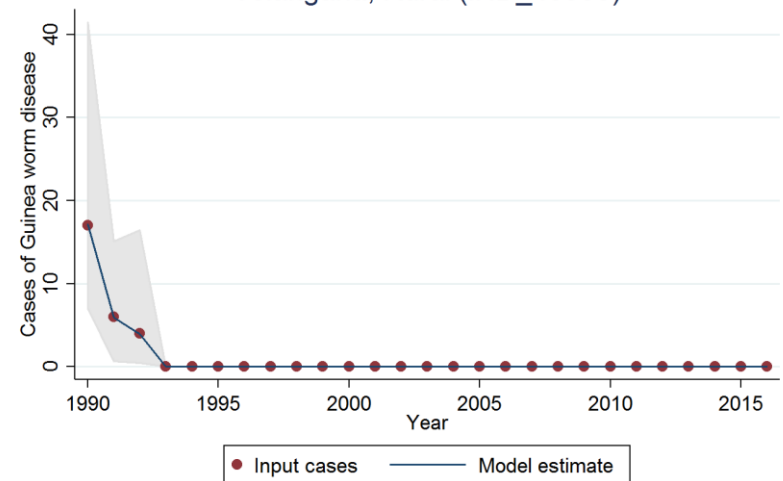

GW Incidence (all-age, both-sex),  
Togo (TGO)

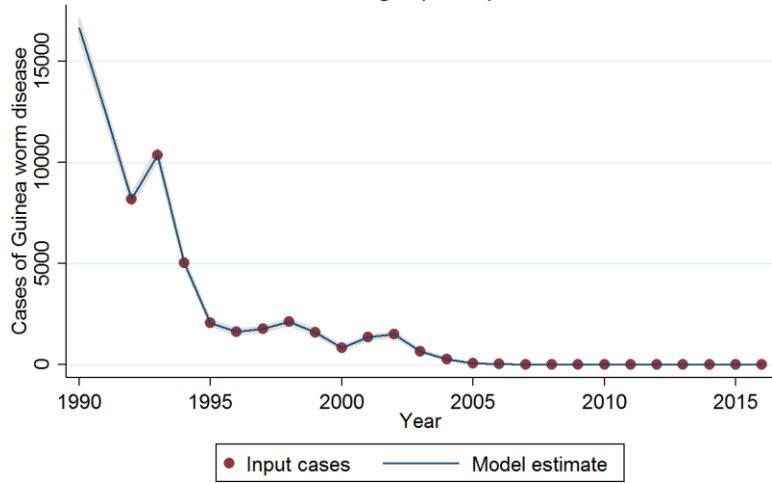

GW Incidence (all-age, both-sex),  
Uganda (UGA)

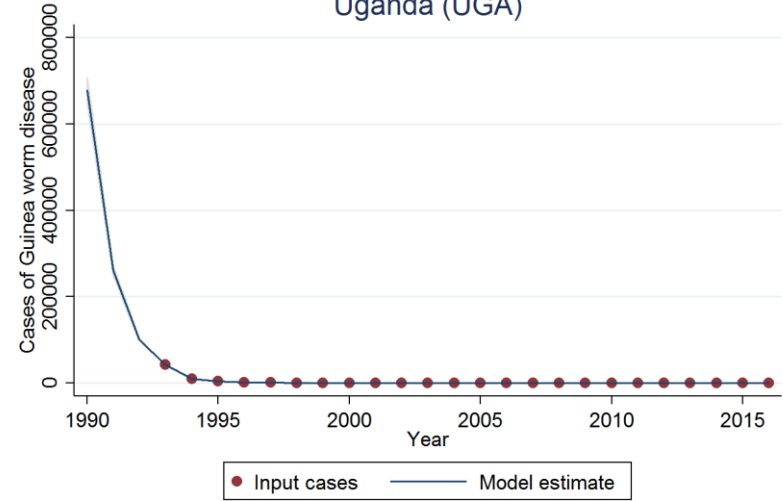

GW Incidence (all-age, both-sex),  
Yemen (YEM)

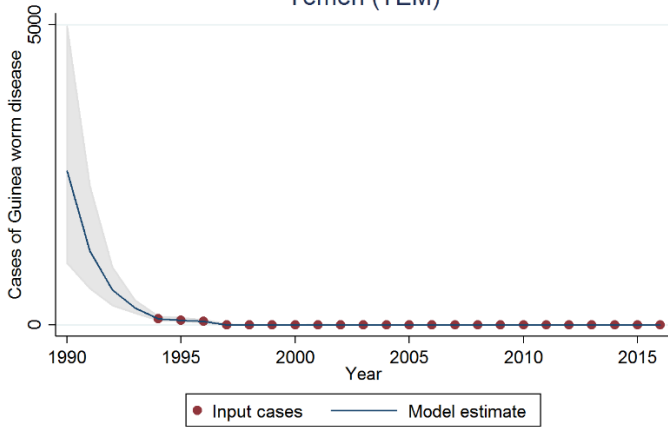

Figure 1. Overall comparison of model versus reported cases (excluding outliers)

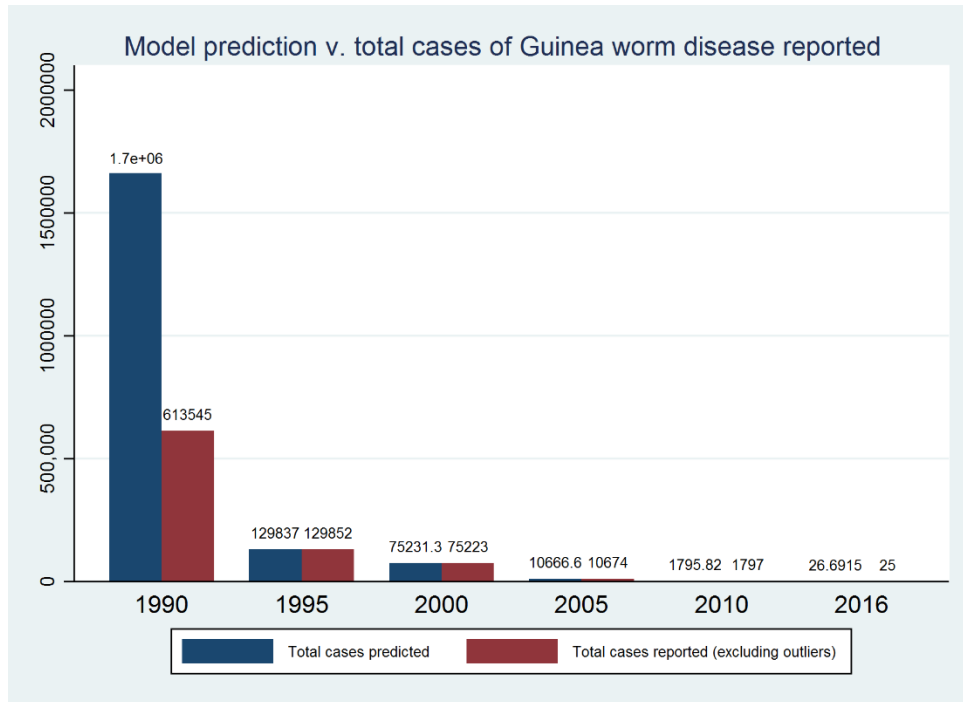

### Sex-specific incidence

To account for the proportion of cases in females compared to males (53% to 47%), the incidence draws were multiplied by the sex proportion and the total population (to estimate number of cases by sex), then divided by the sex-specific total population for that year to calculate sex-specific incidence.

### Age-specific incidence

In order to generate age-specific incidence, a literature search was conducted to identify national and subnational data sources in which age-specific prevalence was reported. The only nationally representative data available were WER reports from 2009 onwards; however, age was only reported as less than 15 years of age or older than 15 years of age. In order to generate a trend over the life course, eight subnational data sources were identified. The prevalence of guinea worm disease was extracted by age category reported in the original paper. An age trend was then fit using DisMod 2.0, with the following model settings:

Age mesh points: 0 0.01 5 10 15 20 25 30 35 40 45 50 55 60 65 70 75 80 85 90 100

Drill year: 2000; Drill location: Global; no birth prevalence; 30 year time window

The age data were used to generate one single age trend that we assumed applied to all locations, and all estimation periods from 1990-2016.



Figure 2. Age-specific prevalence model generated by DisMod

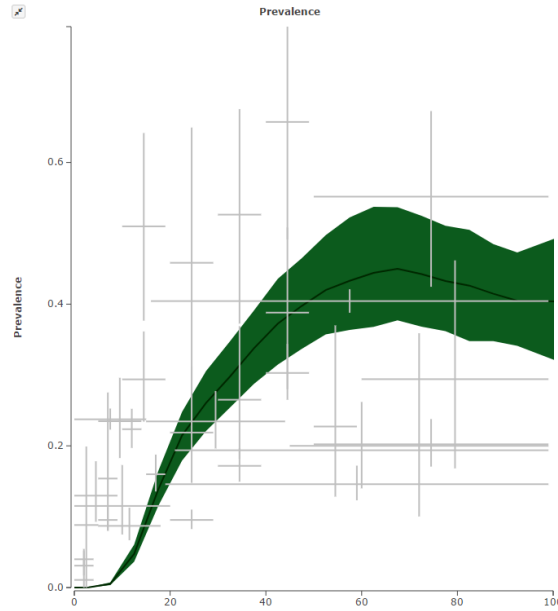

To apply this age prevalence curve to the sex-split incidence draws, 1,000 draws of output were downloaded from DisMod and applied to the incidence data as follows:

$j$  indexes the age strata

$i$  indexes the draw (1 to 1,000)

sex cases draw is the total number of cases for the sex stratum (all ages)

$$age\ cases_j = DisMod\ Draw_{i,j} * age\ population_j$$

$$age\ incidence\ draw_i = \frac{age\ cases_j \left( \frac{sex\ cases\ draw_i}{total\ cases} \right)}{age\ population_j}$$

Under the assumption that Guinea worm disease occurs approximately 1 year post-infection, incidence among children aged less than one year was set to zero.

#### Sequelae splits

Prevalence of the sequelae listed in Table 3 was calculated by multiplying the age and sex-specific incidence draw by the duration of the health state (in years).

- 1) Guinea worm pain associated with worm emergence (Level 2): all cases, 1 month
- 2) Guinea worm pain associated with worm emergence (Level 1): all cases, 2 months plus 30% of cases for an additional 9 months

### 3) Lower limb musculoskeletal problems: all cases, 1 month

Estimates were produced for 1990, 1995, 2000, 2005, 2010, and 2016.

## References

1. Cairncross S, Muller R, Zagaria N. Dracunculiasis (Guinea worm disease) and the eradication initiative. *Clin Microbiol Rev.* 2002;15(2):223-46.
2. Biswas G, Sankara DP, Agua-Agum J, Maiga A. Dracunculiasis (guinea worm disease): eradication without a drug or a vaccine. *Philos Trans R Soc Lond B Biol Sci.* 2013;368(1623):20120146.
3. Ruiz-Tiben E, Hopkins DR. Dracunculiasis (Guinea worm disease) eradication. *Adv Parasitol.* 2006;61:275-309.
4. Greenaway C. Dracunculiasis (guinea worm disease). *CMAJ.* 2004;170(4):495-500.
5. Hopkins DR, Ruiz-Tiben E, Downs P, Withers PC, Jr., Roy S. Dracunculiasis eradication: neglected no longer. *Am J Trop Med Hyg.* 2008;79(4):474-9.
6. Kappus KD, Hopkins DR, Ruiz-Tiben E, Imtiaz R, Andersen J, Azam M, et al. A strategy to speed the eradication of dracunculiasis. *World Health Forum.* 1991;12(2):220-5.
7. Prevention CfDca. Guinea worm wrap-up Atlanta, GA: WHO Collaborating center for Research, Training and Eradication of Dracunculiasis, CDC; 2015.
8. Hopkins DR, Ruiz-Tiben E, Diallo N, Withers PC, Jr., Maguire JH. Dracunculiasis eradication: and now, Sudan. *Am J Trop Med Hyg.* 2002;67(4):415-22.
9. Watts SJ, Brieger WR, Yacoob M. Guinea worm: an in-depth study of what happens to mothers, families and communities. *Soc Sci Med.* 1989;29(9):1043-9.
10. Adeyeba OA, Kale OO. Epidemiology of dracunculiasis and its socio-economic impact in a village in south-west Nigeria. *West Afr J Med.* 1991;10(3-4):208-15.
11. Kale OO. The clinico-epidemiological profile of guinea worm in the Ibadan district of Nigeria. *Am J Trop Med Hyg.* 1977;26(2):208-14.
12. Greenwood B, Greenwood A, Bradley A. Guinea worm infection in northern Nigeria: reflections on a disease approaching eradication. *Trop Med Int Health.* 2017.
13. Tayeh A, Cairncross S. The impact of dracunculiasis on the nutritional status of children in South Kordofan, Sudan. *Ann Trop Paediatr.* 1996;16(3):221-6.
14. Belcher DW, Wurapa FK, Ward WB, Lourie IM. Guinea worm in southern Ghana: its epidemiology and impact on agricultural productivity. *Am J Trop Med Hyg.* 1975;24(2):243-9.
15. Muller R. Guinea worm disease: epidemiology, control, and treatment. *Bull World Health Organ.* 1979;57(5):683-9.
16. Okoye SN, Onwuliri CO, Anosike JC. A survey of predilection sites and degree of disability associated with guineaworm (*Dracunculus medinensis*). *Int J Parasitol.* 1995;25(9):1127-9.
17. Smith GS, Blum D, Huttly SR, Okeke N, Kirkwood BR, Feachem RG. Disability from dracunculiasis: effect on mobility. *Ann Trop Med Parasitol.* 1989;83(2):151-8.
18. Chippaux JP, Banzou A, Agbede K. [Social and economic impact of dracunculosis: a longitudinal study carried out in 2 villages in Benin]. *Bull World Health Organ.* 1992;70(1):73-8.
19. Hours M, Cairncross S. Long-term disability due to guinea worm disease. *Trans R Soc Trop Med Hyg.* 1994;88(5):559-60.

## Other neglected tropical diseases

In addition to the neglected tropical diseases described above, there are many diverse types of neglected tropical diseases, which are encompassed by the following ICD 10 codes: A68-A68.9, A69.2-A69.5, A75-A75.9, A77-A79.9, A92-A94.0, A96-A96.9, A98-A98.8, B58, B59-B60.8, B68-B68.9, B70-B72.0, B74.3-B75, B78-B78.9, B80-B81.8, B83-B83.8, P37.1.

Because these neglected tropical diseases are diverse in their underlying causes and risk factors as well as in their associated health outcomes, modelling them together in a DisMod-MR model would not produce reliable estimates of prevalence or excess mortality. Instead, we calculated the YLDs caused by neglected tropical diseases directly using a YLD/YLL ratio.

We calculated the ratio of YLDs to YLLs across the specified neglected tropical diseases for which nonfatal outcomes were modelled, using YLL estimates from the GBD 2015 cause of death (CoD) analysis. We then multiplied this YLD/YLL ratio by the YLL estimates for other neglected tropical diseases from the GBD 2015 CoD analysis, providing us with an estimate of the YLDs associated with other neglected tropical diseases.

## Changes from GBD 2015 to GBD 2016

We have made no substantive changes in the modelling strategy from GBD 2015 to GBD 2016.

# Maternal Disorders

- 1) Abortion, ectopic pregnancy, and miscarriage;
- 2) Obstructed labor and uterine rupture;
- 3) Maternal hemorrhage;
- 4) Maternal sepsis and other maternal infections;
- 5) Maternal hypertensive disorders;
- 6) Other maternal disorders

## Flowchart

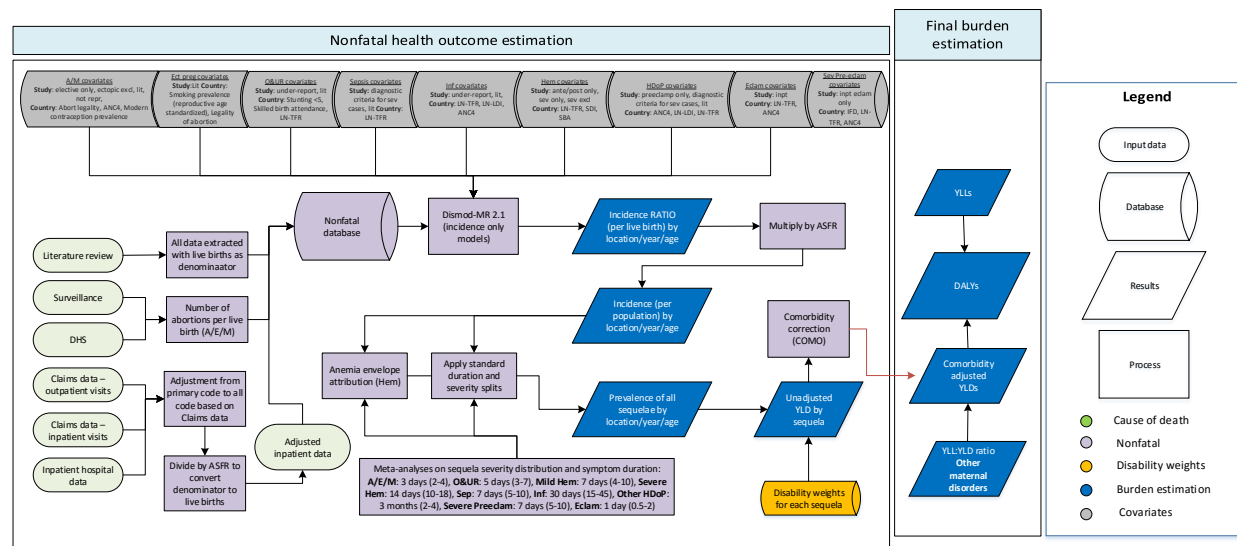

**Abbreviations**  
 A/M: Abortion and miscarriage; Ect Preg: Ectopic pregnancy; O&UR: Obstructed labor and uterine rupture; Hem: Maternal hemorrhage; Sep: Maternal sepsis; Inf: Other maternal infections; HDoP: Maternal hypertensive disorders;  
 Eclam: Eclampsia; Sev pre-eclam: Severe pre-eclampsia; ASFR: Age-specific fertility rate; Stunting <5: Stunting (proportion <SD height for age, <5 years); MS: Market scan; ANCD: coverage of 4 visits of antenatal care; SD: Socio-Demographic Index; Lit: Literature data; Inpt: Inpatient data; not repr: Not representative; UN: Natural log; TFR: Total fertility rate; LDI: Lag-distributed income per capita; SBA: Skilled birth attendance (proportion); IFD: In facility delivery

## Input data and methodological summary

### Case definition

Maternal disorders are those complications occurring during pregnancy, childbirth, and the postpartum period. Seven different statistical models were completed for GBD 2016. These included 1) abortion, ectopic pregnancy, miscarriage, 2) obstructed labor and uterine rupture, 3) maternal hemorrhage (including placental disorders), 4) maternal sepsis, 5) other maternal infections, 6) hypertensive disorders of pregnancy, 7) eclampsia. Other direct maternal disorders were estimated using a YLD-to-YLL ratio approach used for multiple different GBD causes. Late maternal death and indirect maternal disorders, including HIV-related maternal death, were not assigned any disability as the disability associated with them was assumed to be included in estimates for the underlying conditions. ICD-9 and ICD-10 codes for each of the statistical models are contained in the table below.

Table 1. ICD codes for maternal disorders

| International classification of diseases codes for maternal disorders in GBD 2015 non-fatal analysis |            |           |
|------------------------------------------------------------------------------------------------------|------------|-----------|
| Model                                                                                                | ICD10 code | ICD9 code |

|                                      |                                      |                                                      |
|--------------------------------------|--------------------------------------|------------------------------------------------------|
| Abortion, miscarriage                | O01-O08, O36.4                       | 631, 634-639                                         |
| Ectopic pregnancy                    | O00                                  | 633-633.91                                           |
| Maternal hemorrhage                  | O20, O43.2, O44-O46, O62.2, O67, O72 | 640-641, 661.0, 666                                  |
| Eclampsia                            | O15                                  | 642.6                                                |
| Hypertensive disorders of pregnancy  | O11-O16                              | 642.3, 642.4, 642.5, 642.6, 642.7, 642.9             |
| Severe Pre-eclampsia                 | O14.1-O14.13                         | 642.5-642.54                                         |
| Obstructed labor and uterine rupture | O64-O66, O71, O83                    | 659-660, 662, 665, 669.5, 669.6                      |
| Other maternal infections            | O23, O41, O75.2-3, O86, O91          | 646.5, 646.6, 659.2, 672.0, 674.1, 674.2, 674.3, 675 |
| Maternal sepsis                      | O85                                  | 659.3, 670                                           |

## Input data

Systematic literature reviews were completed for GBD 2010, GBD 2013 and GBD 2015. These were updated on August 31<sup>st</sup> 2016 using the combined search string below. In addition, we searched ministry of health websites for pregnancy complication data and used from Confidential Enquiry and other sources used in our maternal mortality analyses when they presented data on pregnancy complications. We also performed snowball searches for abortion reporting and surveillance data systems, finding multiple such systems throughout high income countries and several locations in Central and Eastern Europe. Inpatient and outpatient data were used, as was claims data from MarketScan in the United States. This data was extracted and processed as described in the section on hospital data, including use of primary-to-any inpatient ratio to correct for under-reporting of pregnancy complications in hospital datasets that rely only on primary discharge codes. All data was extracted in standard fashion, uploaded and stored on a centralized SQL database. The final dataset contents for each of the models is shown below as well.

### Maternal Disorders

```
( ( ( "Postpartum Hemorrhage" OR "Uterine Hemorrhage" ) OR ( maternal[Title/Abstract] OR pregnant[Title/Abstract] OR pregnancy[Title/Abstract] OR mothers ) AND ( haemorrhag*[Title/Abstract] OR hemorrhag*[Title/Abstract] ) NOT "case report"[All fields] ) AND ( 2015/04/30[PDat] : 2016/12/31[PDat] ) AND humans[MeSH Terms] ) OR ( ( ( "induced abortion" OR "Therapeutic abortion" OR "legal Abortion" OR "medical abortion" OR "miscarriage" OR "Abortion, Induced"[Mesh] OR "Abortion, Therapeutic"[Mesh] OR "Abortion, Legal"[Mesh] OR "ectopic Pregnancy" ) NOT ( "case report"[Title/Abstract] OR "birth defect"[Title/Abstract] OR congenital[Title/Abstract] ) ) AND ( 2015/04/30[PDat] : 2016/12/31[PDat] ) AND humans[MeSH Terms] ) OR ( ( "obstructed labour" OR "obstructed labor" OR "labour dystocia" OR "labor dystocia" OR dystocia OR "cephalopelvic disproportion" OR "cephalo-pelvic disproportion" ) AND ( 2015/03/15[PDAT] : 2016/12/31[PDAT] ) ) AND (Humans[MeSH Terms]) ) OR ( ( ( "obstetric fistula" OR "vesicovaginal fistula" ) OR
```

"rectovaginal fistula" ) AND ( 2015/03/15[PDAT] : 2016/12/31[PDAT] ) AND humans[MeSH Terms] ) OR ( ( "Puerperal Infection"[Mesh] OR "Puerperal Infection" OR ( maternal[Title/Abstract] OR pregnant[Title/Abstract] OR pregnancy[Title/Abstract] ) ) AND ( Sepsis OR infection[Title/Abstract] ) ) ) NOT "case report" AND ( 2015/07/31[PDat] : 2016/12/31[PDat] ) AND humans[MeSH Terms] ) OR ( ( Pre-Eclampsia[Title/Abstract] OR preeclampsia[Title/Abstract] OR Eclampsia[Title/Abstract] OR Pre-Eclampsia[Mesh] OR Eclampsia[Mesh] OR "Hypertension, Pregnancy-Induced"[Mesh] OR "pregnancy induced hypertension"[Title/Abstract] OR "gestational hypertension"[Title/Abstract] OR "Hypertensive disorders of pregnancy"[Title/Abstract] ) NOT ("case report" OR "kidney don\*" [Title/Abstract] OR polymorphism\* [Title/Abstract] OR endotheli\* [Title/Abstract] ) ) AND ( 2015/07/31[PDat] : 2016/12/31[PDat] ) AND "humans"[MeSH Terms] ) **2519 hits, 22 new sources extracted.**

|                        | Incidence |
|------------------------|-----------|
| Studies                | 22        |
| Countries/subnationals | 21/3      |
| GBD world regions      | 10        |

## Modeling strategy

We estimated the incidence ratio of each category of pregnancy complications using DisMod-MR 2.1, with the exception of other maternal disorders which we estimated using a YLD-to-YLL ratio approach used in multiple causes across the GBD 2016. The reason is that most literature and surveillance data is expressed in terms of number of events per live birth rather than per population. Hospital and claims data, which was centrally processed for all GBD 2016 causes to have population as the denominator, was transformed to have live births as the denominator by dividing by age-specific fertility rate (ASFR; live births per population).

We used the datasets described above to estimate incidence ratio for each age-sex-location-year in the GBD 2016 location hierarchy using DisMod-MR 2.1. A number of study-level covariates were used to crosswalk from non-standard sub-populations or case definitions. For most conditions, MarketScan claims data or literature data were considered to be the closest approximation of the true incidence of complications so were identified as the reference category. A series of country covariates were then chosen to help drive the magnitude of estimates in areas of sparse or absent data. As fertility rate is partially related to the number of cases of a given complication, the natural log of total fertility rate (TFR) from our demographics analysis was used in most of the models. No specific age or slope priors were used. All models were run with a time window of five years. The quantitative results of study-level and country-level covariates for each condition are shown below.

### *Abortion and miscarriage*

| Study-level covariate | Parameter | Location level | beta                           | Exponentiated beta |
|-----------------------|-----------|----------------|--------------------------------|--------------------|
| Not representative    | Incidence | Global         | -1.2e-03 (-2.6e-03 — -2.6e-04) | 1.00 (1.00 — 1.00) |

|                                      |           |        |                                |                    |
|--------------------------------------|-----------|--------|--------------------------------|--------------------|
| Hospital Inpatient                   | Incidence | Global | -7.9e-04 (-2.4e-03 — -3.8e-04) | 1.00 (1.00 — 1.00) |
| Elective pregnancy terminations only | Incidence | Global | -9.7e-03 (-0.054 — -3.8e-05)   | 0.99 (0.95 — 1.00) |
| Marketscan, year 2000                | Incidence | Global | -1 (-1.99 — -0.03)             | 0.37 (0.14 — 0.97) |
| Marketscan, year 2010                | Incidence | Global | -1.02 (-2 — 0)                 | 0.36 (0.14 — 1.00) |
| Marketscan, year 2012                | Incidence | Global | -1.01 (-2 — -0.051)            | 0.36 (0.14 — 0.95) |

| Country-level covariate                         | Parameter | Location level | beta                           | Exponentiated beta |
|-------------------------------------------------|-----------|----------------|--------------------------------|--------------------|
| Legality of Abortion                            | Incidence | Global         | 0.020 (0.019 — 0.021)          | 1.02 (1.02 — 1.02) |
| Antenatal Care (4 visits) Coverage (proportion) | Incidence | Global         | -3.8e-04 (-1.6e-03 — -6.0e-06) | 1.00 (1.00 — 1.00) |
| Contraception (Modern) Prevalence (proportion)  | Incidence | Global         | -0.53 (-0.6 — -0.33)           | 0.59 (0.55 — 0.72) |

#### Ectopic pregnancy

| Study-level covariate | Parameter | Location level | beta               | Exponentiated beta    |
|-----------------------|-----------|----------------|--------------------|-----------------------|
| Hospital Inpatient    | Incidence | Global         | 2.50 (2.50 — 2.50) | 12.18 (12.17 — 12.18) |

| Country-level covariate | Parameter | Location level | beta                     | Exponentiated beta |
|-------------------------|-----------|----------------|--------------------------|--------------------|
| Legality of Abortion    | Incidence | Global         | -0.012 (-0.013 — -0.011) | 0.99 (0.99 — 0.99) |

#### Maternal hemorrhage

| Study-level covariate      | Parameter | Location level | beta                          | Exponentiated beta |
|----------------------------|-----------|----------------|-------------------------------|--------------------|
| Postpartum hemorrhage only | Incidence | Global         | -6.6e-03 (-0.022 — -3.9 e-04) | 0.99 (0.98 — 1.00) |
| Hospital Inpatient         | Incidence | Global         | 1.00 (1.00 — 1.00)            | 2.72 (2.71 — 2.72) |
| Antepartum hemorrhage only | Incidence | Global         | -0.63 (-0.99 — -0.28)         | 0.53 (0.37 — 0.76) |
| Severe hemorrhage excluded | Incidence | Global         | -0.027 (-0.1 — -7.3e-04)      | 0.97 (0.90 — 1.00) |
| Severe hemorrhage only     | Incidence | Global         | -0.12 (-0.28 — -7.9e-03)      | 0.89 (0.76 — 0.99) |

| Country-level covariate               | Parameter | Location level | beta                         | Exponentiated beta |
|---------------------------------------|-----------|----------------|------------------------------|--------------------|
| Skilled Birth Attendance (proportion) | Incidence | Global         | -3.5e-03 (-0.013 — -3.3e-04) | 1.00 (0.99 — 1.00) |
| Sociodemographic Index                | Incidence | Global         | 1.8e-03 (5.1e-05 — 8.3e-03)  | 1.00 (1.00 — 1.01) |
| Total Fertility Rate                  | Incidence | Global         | -0.1 (-0.11 — -0.1)          | 0.90 (0.90 — 0.90) |

*Hypertensive disorders of pregnancy*

| Study-level covariate                                                | Parameter | Location level | beta                  | Exponentiated beta |
|----------------------------------------------------------------------|-----------|----------------|-----------------------|--------------------|
| Hospital Inpatient                                                   | Incidence | Global         | 0.40 (0.37 — 0.46)    | 1.50 (1.45 — 1.58) |
| Literature                                                           | Incidence | Global         | -0.3 (-0.3 — -0.28)   | 0.74 (0.74 — 0.76) |
| Diagnostic criteria for severe cases                                 | Incidence | Global         | -1.84 (-1.88 — -1.78) | 0.16 (0.15 — 0.17) |
| Includes only preeclampsia data (not other gestational hypertension) | Incidence | Global         | -1.16 (-1.17 — -1.13) | 0.31 (0.31 — 0.32) |

| Country-level covariate                         | Parameter | Location level | beta                           | Exponentiated beta |
|-------------------------------------------------|-----------|----------------|--------------------------------|--------------------|
| Antenatal Care (4 visits) Coverage (proportion) | Incidence | Global         | -1.5e-04 (-1.5e-04 — -1.3e-05) | 1.00 (1.00 — 1.00) |
| LDI (I\$ per capita)                            | Incidence | Global         | -3.6e-05(-1.4e-04 — -9.9e-06)  | 1.00 (1.00 — 1.00) |
| Total Fertility Rate                            | Incidence | Global         | -1.5 (-1.5 — -1.5)             | 0.22 (0.22 — 0.22) |

*Eclampsia*

| Study-level covariate | Parameter | Location level | beta                  | Exponentiated beta |
|-----------------------|-----------|----------------|-----------------------|--------------------|
| Hospital Inpatient    | Incidence | Global         | 1.99 (1.85 — 2.00)    | 7.28 (6.39 — 7.39) |
| Literature            | Incidence | Global         | -1.34 (-1.54 — -1.25) | 0.26 (0.21 — 0.29) |

| Country-level covariate | Parameter | Location level | beta | Exponentiated beta |
|-------------------------|-----------|----------------|------|--------------------|
|-------------------------|-----------|----------------|------|--------------------|



|                                                    |           |        |                       |                    |
|----------------------------------------------------|-----------|--------|-----------------------|--------------------|
| Antenatal Care (4 visits)<br>Coverage (proportion) | Incidence | Global | -4.11 (-6.08 — -3.14) | 2.3e-03 — 0.043)   |
| Total Fertility Rate                               | Incidence | Global | -0.98 (-1.06 — -0.94) | 0.37 (0.35 — 0.39) |

Severe pre-eclampsia

| Study-level covariate | Parameter | Location level | beta               | Exponentiated beta |
|-----------------------|-----------|----------------|--------------------|--------------------|
| Hospital Inpatient    | Incidence | Global         | 2.00 (2.00 — 2.00) | 7.39 (7.38 — 7.39) |

| Country-level covariate                            | Parameter | Location level | beta                           | Exponentiated beta |
|----------------------------------------------------|-----------|----------------|--------------------------------|--------------------|
| Antenatal Care (4 visits)<br>Coverage (proportion) | Incidence | Global         | -1.6e-03 (-5.2e-03 — -5.3e-05) | 1.00 (0.99 — 1.00) |
| Total Fertility Rate                               | Incidence | Global         | -1.5 (-1.5 — -1.49)            | 0.22 (0.22 — 0.23) |
| LDI (I\$ per capita)                               | Incidence | Global         | -3.3e-04(-1.6e-03 — -1.8e-05)  | 1.00 (1.00 — 1.00) |

Obstructed labor and uterine rupture

| Study-level covariate | Parameter | Location level | beta                        | Exponentiated beta |
|-----------------------|-----------|----------------|-----------------------------|--------------------|
| Under Reported        | Incidence | Global         | -8.8e-03 (-0.04 — -1.8e-04) | 0.99 (0.96 — 1.00) |
| Hospital Inpatient    | Incidence | Global         | 2.00 (2.00 — 2.00)          | 7.38 (7.37 — 7.39) |
| Marketscan, year 2000 | Incidence | Global         | 1.99 (1.95 — 2.00)          | 7.29 (7.04 — 7.39) |
| Marketscan, year 2010 | Incidence | Global         | 1.88 (1.80 — 1.95)          | 6.52 (6.05 — 7.02) |
| Marketscan, year 2012 | Incidence | Global         | 1.85 (1.77 — 1.91)          | 6.33 (5.88 — 6.77) |

| Country-level covariate                             | Parameter | Location level | beta                       | Exponentiated beta |
|-----------------------------------------------------|-----------|----------------|----------------------------|--------------------|
| Stunting (proportion <2SD height for age, <5 years) | Incidence | Global         | 0.11 (0.0061 — 0.36)       | 1.11 (1.01 — 1.44) |
| Skilled Birth Attendance (proportion)               | Incidence | Global         | -0.015 (-0.059 — -5.8e-04) | 0.99 (0.94 — 1.00) |

Maternal sepsis

| Study-level covariate                | Parameter | Location level | beta                          | Exponentiated beta    |
|--------------------------------------|-----------|----------------|-------------------------------|-----------------------|
| Hospital Inpatient                   | Incidence | Global         | 3.00 (3.00 — 3.00)            | 20.08 (20.07 — 20.09) |
| Diagnostic criteria for severe cases | Incidence | Global         | -7.1e-03 (-0.026 - - 4.7e-04) | 0.99 (0.97 — 1.00)    |
| Marketscan, year 2000                | Incidence | Global         | 1.99 (1.97 — 2.00)            | 7.31 (7.14 — 7.39)    |
| Marketscan, year 2010                | Incidence | Global         | 1.99 (1.96 — 2.00)            | 7.32 (7.12 — 7.39)    |
| Marketscan, year 2012                | Incidence | Global         | 1.98 (1.93 — 2.00)            | 7.21 (6.88 — 7.38)    |

*Other maternal infections:*

| Study-level covariate | Parameter | Location level | beta                    | Exponentiated beta |
|-----------------------|-----------|----------------|-------------------------|--------------------|
| Hospital Inpatient    | Incidence | Global         | 0.50 (0.50 — 0.50)      | 1.65 (1.65 — 1.65) |
| Under Reported        | Incidence | Global         | -0.52 (-1.18 — - 0.046) | 0.59 (0.31 — 0.96) |
| Marketscan, year 2000 | Incidence | Global         | 1.66 (1.43 — 1.79)      | 5.25 (4.16 — 5.99) |
| Marketscan, year 2010 | Incidence | Global         | 1.85 (1.62 — 1.98)      | 6.37 (5.07 — 7.21) |
| Marketscan, year 2012 | Incidence | Global         | 1.91 (1.68 — 2.00)      | 6.72 (5.34 — 7.37) |

| Country-level covariate | Parameter | Location level | beta                          | Exponentiated beta |
|-------------------------|-----------|----------------|-------------------------------|--------------------|
| Socio-demographic Index | Incidence | Global         | -7.4e-03 (-0.024 - - 1.7e-04) | 0.99 (0.98 — 1.00) |

## Severity splits

After completion of DisMod-MR 2.1 models, all age-specific ratios were then converted to population rates by multiplying by ASFR. Maternal hemorrhage was split between moderate (500-<1000ml blood loss) and severe (>1000 blood loss) on the basis of a meta-analysis of 19 studies<sup>1</sup>. Data on the average duration of acute symptoms were not available so, after consultation with clinician collaborators, we assigned a duration of 7 days (+/-3) for moderate hemorrhage and 14 days (+/- 4) for severe hemorrhage. The total maternal hemorrhage incidence served as input to the causal attribution process of the overall anemia envelope, which is described separately. This is a change from GBD 2013, when only the prevalence of maternal hemorrhage was considered in anemia causal attribution which was inappropriate because the disability from hemorrhage-induced anemia is longer-lasting than the acute hemorrhagic event, a situation that was not previously reflected. Acute disability was calculated assuming incident cases of abortion, ectopic pregnancy, and miscarriage persist for an average of 3 days (+/-1) and obstructed labor was assigned a duration of 5 days (+/-2). Again, these determinations were based on clinical expert determination as we could not identify any data to inform this.

Hypertensive disorders of pregnancy (HDoP) and maternal sepsis and other maternal infections were estimated in two models each. HDoP YLD estimates included severe preeclampsia and other HDoP which were derived from two models of total HDoP and severe pre-eclampsia. The duration of severe preeclampsia was assigned to be 7 days (+/-2) and other HDoP was assigned a duration of 3 months (2-4). Eclampsia was a separate model, assigned a duration of 1 day (+/-1). A large number of those with severe preeclampsia go on to have long term sequelae of the condition<sup>2</sup>, as do those with eclampsia<sup>3,4</sup>, both of which were included in the estimates of HDoP and were a bulk of the YLD for those conditions. Maternal sepsis was assigned a duration of 5 days (+/-2) and, based on the same data identified in our review of pelvic inflammatory disease (PID; described separately), a proportion of incident cases were estimated to continue on to have secondary infertility due to maternal sepsis. Other maternal infections were assigned a wide potential duration of 15 to 45 days (mean 30).

### Uncertainty and model selection

For all maternal disorders, uncertainty bounds include uncertainty due to input data, crosswalks from non-reference definitions, uncertainty in numerical solutions (posteriors) of each DisMod-MR 2.1 model, duration of symptoms, and proportion of all persons with each type of symptom.

In consultation with GBD researchers and collaborators, final models were selected on a combination of qualitative and quantitative goodness of fit to input data, plausibility of geographic and temporal trends, consistency of age pattern, and, when available, comparison with other published studies on the epidemiology of pregnancy complications. Directionality, magnitude, and plausibility of study-level and country-level covariates was also considered in the process of model development. Of note, due to the nature of statistical modeling, final results do not always cover the values reported in input data.

# Obstetric fistula

## Flowchart

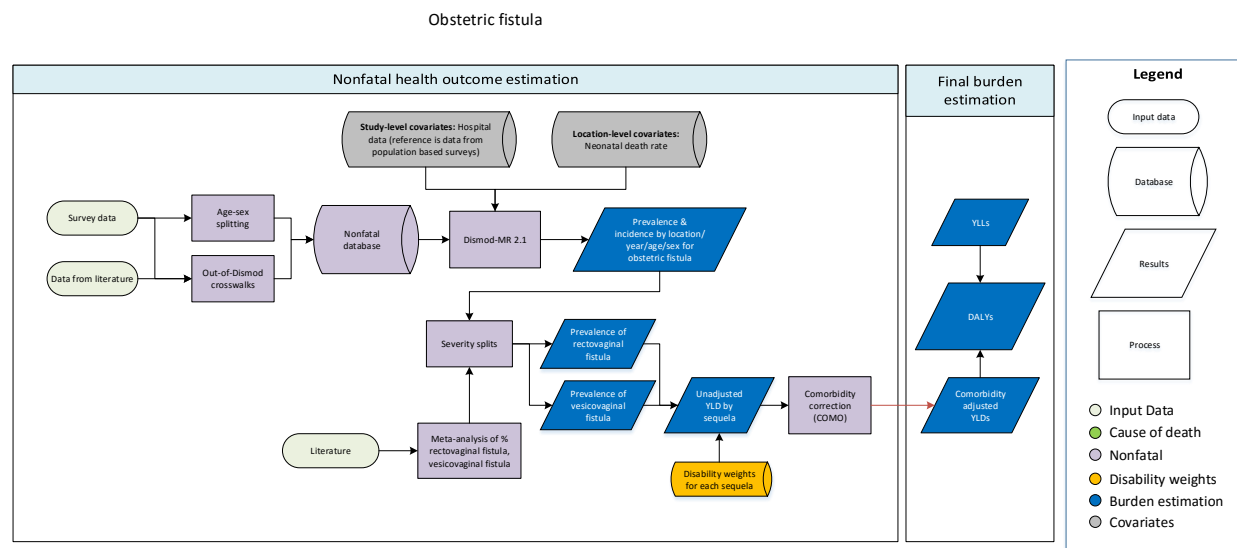

## Case Definition

Obstetric fistula is a severe long-term complication of prolonged obstructed labor in which a fistula (hole) develops between the birth canal and the bladder and/or rectum. The ICD codes include:

## Input data

### Model Inputs

A systematic review was conducted for GBD 2015. The PubMed search terms were: (('obstetric fistula'[All Fields] OR 'vesicovaginal fistula'[All Fields]) OR 'rectovaginal fistula'[All Fields]) AND ('2013'[PDAT] : '2015'[PDAT]) AND 'humans'[MeSH Terms].

The exclusion criteria were:

27. Studies that did not provide primary data on epidemiological parameters, e.g. commentaries
28. Case series
29. Reviews

The table below shows the number of literature studies included in GBD2015, as well as the number of countries or subnational units and GBD world regions represented.

|                        | Prevalence | Incidence | Mortality risk |
|------------------------|------------|-----------|----------------|
| Studies                | 8          | 3         | -              |
| Countries/subnationals | 8          | 3         | -              |

|                   |   |   |   |
|-------------------|---|---|---|
| GBD world regions | 3 | 1 | - |
|-------------------|---|---|---|

In addition to using data from published studies, we also included data from UNFPA reports, and nationally representative Demographic and Health Surveys and Multiple Indicator Cluster Surveys.

### *Severity Splits*

The following severity distributions were assigned based a meta-analysis of published studies<sup>1-4</sup> and Pakistan Demographic and Health survey (2006-2007): vesicovaginal fistula (90.8%, 95% CI: 85.0 to 95.4%); rectovaginal fistula (9.2%, 95% CI: 4.6 to 15.0%). The lay descriptions and disability weights for severity levels derived from the GBD Disability Weights study are shown below.

| Severity level        | Lay description                                                                                                                                                                         | DW (95% CI)            |
|-----------------------|-----------------------------------------------------------------------------------------------------------------------------------------------------------------------------------------|------------------------|
| vesicovaginal fistula | has an abnormal opening between the bladder and the vagina, which makes her unable to control urinating. The woman is anxious and depressed.                                            | 0.342<br>(0.227-0.478) |
| rectovaginal fistula  | has an abnormal opening between her vagina and rectum causing flatulence and feces to escape through the vagina. The person gets infections in her vagina, and has pain when urinating. | 0.501<br>(0.339-0.657) |

### Modeling Strategy

Obstetric fistula was modeled using DisMod-MR 2.1. We used neonatal mortality rate as a country-level covariate. We also included a study-level covariate indicating whether it was a hospital-based or community-based study. Remission was calculated, using the cure data from 11 Demographic and Health surveys, by dividing the number of cured obstetric fistula cases by total person years of follow up of all cases (cured, uncured and untreated). The person year of follow up for uncured or untreated fistula cases was calculated as the time interval (in year) between the last birth and the date of interview. For cured cases, we assumed that the person year of follow up was half the time interval (in year) between the last birth and the date of interview.

Betas and exponentiated values (which can be interpreted as an odds ratio) are shown in the table below:

| Covariate               | Parameter  | Beta (95% CI)         | Exponentiated beta (95% CI) |
|-------------------------|------------|-----------------------|-----------------------------|
| Neonatal mortality rate | Prevalence | 1.96 (1.85 — 2.00)    | 7.09 (6.35 — 7.38)          |
| Neonatal mortality rate | Incidence  | 0.54 (0.026 — 1.14)   | 1.72 (1.03 — 3.13)          |
| Neonatal mortality rate | Remission  | -0.73 (-0.99 — -0.28) | 0.48 (0.37 — 0.76)          |
| Hospital data           | Prevalence | -1.75 (-1.99 — -1.27) | 0.17 (0.14 — 0.28)          |
| Hospital data           | Incidence  | -0.65 (-1.86 — 0.85)  | 0.52 (0.16 — 2.35)          |

### References

1. Danso KA, Martey J, Wall LL, Elkins TE. The epidemiology of genitourinary fistulae in Kumasi, Ghana, 1977–1992. *International Urogynecology Journal*. 1996;7(3):117-120.
2. Wall LL, Karshima JA, Kirschner C, Arrowsmith SD. The obstetric vesicovaginal fistula: characteristics of 899 patients from Jos, Nigeria. *Am. J. Obstet. Gynecol.* 2004;190(4):1011-1016.
3. Das R, Sengupta S. Vesico-vaginal fistula of obstetric origin. *J. Obstet. Gynaecol. India*. 1969;19:383-389.
4. Mahfouz NP. Urinary and Faecal Fistulae. *BJOG*. 1938;45(3):405-424.

# Preterm Birth Complications

## Flowchart

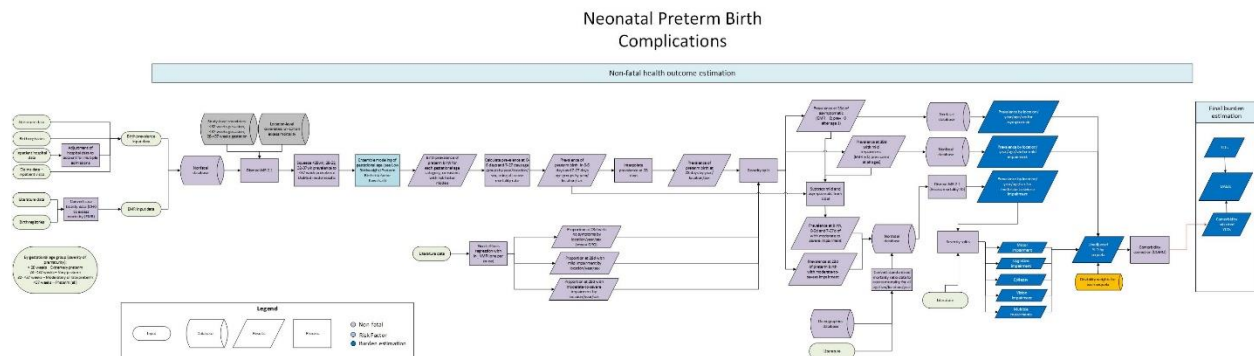

## Input data and methodological summary

### Case definition

Preterm birth is defined as live birth before 37 completed weeks of gestation. In our analysis, we further break down this cause into three sub-categories of preterm birth, based on gestational age: extremely preterm (<28 weeks), very preterm (28 to <32 weeks), and moderate to late preterm (32 to <37 weeks). These categories are based on the World Health Organization (WHO) definition of preterm birth.<sup>1</sup>

### Input data

#### Model inputs

A systematic review was completed for GBD 2010, and for GBD 2013 and GBD 2016, a review was conducted on literature published since the previous addition. The PubMed database was searched using the following search string: (((("Infant, Premature"[Mesh] OR ("infant"[All Fields] AND "premature"[All Fields]) OR "premature infant"[All Fields] OR ("preterm"[All Fields] AND "infant"[All Fields]) OR "preterm infant"[All Fields] OR ("infant, newborn"[MeSH Terms] OR ("infant"[All Fields] AND "newborn"[All Fields]) OR "newborn infant"[All Fields] OR ("newborn"[All Fields] AND "infant"[All Fields]))) AND (premature[All Fields] OR preterm[All Fields]) OR "premature birth"[MeSH Terms] OR ("premature"[All Fields] AND "birth"[All Fields]) OR "premature birth"[All Fields] OR ("preterm"[All Fields] AND "birth"[All Fields]) OR "preterm birth"[All Fields]) (((("Infant, Premature"[Mesh] OR ("infant"[All Fields] AND "premature"[All Fields]) OR "premature infant"[All Fields] OR ("preterm"[All Fields] AND "infant"[All Fields]) OR "preterm infant"[All Fields] OR ("infant, newborn"[MeSH Terms] OR ("infant"[All Fields] AND "newborn"[All Fields]) OR "newborn infant"[All Fields] OR ("newborn"[All Fields] AND "infant"[All Fields]))) AND (premature[All Fields] OR preterm[All Fields]) OR "premature birth"[MeSH Terms] OR ("premature"[All Fields] AND "birth"[All Fields]) OR "premature birth"[All Fields] OR ("preterm"[All Fields] AND "birth"[All Fields]) OR "preterm birth"[All Fields]) AND ("2012"[PDAT] : "3000"[PDAT]) AND "humans"[MeSH Terms].

<sup>1</sup> <http://www.who.int/mediacentre/factsheets/fs363/en/>

The exclusion criteria were:

1. Studies that did not provide primary data on epidemiological parameters, e.g., a commentary piece
2. Non-representative studies (e.g., only high-risk pregnancies)
3. Reviews

The table below shows the number of literature studies included in the estimates for GBD 2016, as well as the number of countries or subnational units and GBD world regions represented.

**Table 1a-c. Data geographies**

**Preterm Birth <28 Weeks**

|                   | Birth prevalence | Case fatality |
|-------------------|------------------|---------------|
| Studies           | 219              | 125           |
| Locations         | 281              | 100           |
| GBD world regions | 15               | 18            |

**Preterm Birth 28-<32 Weeks**

|                   | Birth prevalence | Case fatality |
|-------------------|------------------|---------------|
| Studies           | 225              | 119           |
| Locations         | 282              | 99            |
| GBD world regions | 18               | 17            |

**Preterm Birth 32-<37 Weeks**

|                   | Birth prevalence | Case fatality |
|-------------------|------------------|---------------|
| Studies           | 87               | 95            |
| Locations         | 244              | 84            |
| GBD world regions | 14               | 10            |

In addition to literature data, data from US claims data for 2010 and 2012 by US state were included. Hospital data from 81 additional locations were used to inform estimates for extremely preterm infants, while hospital data was available for 17 additional locations for the next two oldest gestational age categories. Only inpatient data was included from these datasets, because we believed it would be more representative of the true prevalence of preterm birth than outpatient data: preterm infants in the countries from which hospital data was available are almost sure to be admitted to the hospital, whereas outpatient data is more likely to capture repeated visits by the same child as they grow.

*Severity splits and disability weights*

The basis of the GBD disability weight (DW) survey assessments are lay descriptions of sequelae highlighting major functional consequences of symptoms. The lay descriptions and disability weights for preterm birth are shown below. Further severity levels are calculated by combining several of these disability weights, e.g., moderate motor plus cognitive impairment with blindness.



**Table 2. Severity, lay description, and DWs**

| Severity level                                                        | Lay description                                                                                                                                                                                                                       |
|-----------------------------------------------------------------------|---------------------------------------------------------------------------------------------------------------------------------------------------------------------------------------------------------------------------------------|
| Motor plus cognitive impairments, mild                                | has some difficulty in moving around but is able to walk without help. The person is slow in learning at school. As an adult, the person has some difficulty doing complex or unfamiliar tasks but otherwise functions independently. |
| Motor impairment, mild                                                | has some difficulty in moving around but is able to walk without help.                                                                                                                                                                |
| Motor impairment, moderate                                            | has some difficulty in moving around, and difficulty in lifting and holding objects, dressing and sitting upright, but is able to walk without help.                                                                                  |
| Motor impairment, severe                                              | is unable to move around without help, and is not able to lift or hold objects, get dressed or sit upright.                                                                                                                           |
| Distance vision, mild impairment                                      | has some difficulty with distance vision, for example reading signs, but no other problems with eyesight.                                                                                                                             |
| Distance vision, moderate impairment                                  | has vision problems that make it difficult to recognize faces or objects across a room.                                                                                                                                               |
| Distance vision, severe impairment                                    | has severe vision loss, which causes difficulty in daily activities, some emotional impact (for example worry), and some difficulty going outside the home without assistance.                                                        |
| Distance vision blindness                                             | is completely blind, which causes great difficulty in some daily activities, worry and anxiety, and great difficulty going outside the home without assistance.                                                                       |
| Motor plus cognitive impairments, mild                                | Combined DW                                                                                                                                                                                                                           |
| Motor impairment with blindness, moderate                             | Combined DW                                                                                                                                                                                                                           |
| Motor impairment with epilepsy, moderate                              | Combined DW                                                                                                                                                                                                                           |
| Motor impairment with blindness and epilepsy, moderate                | Combined DW                                                                                                                                                                                                                           |
| Motor plus cognitive impairment with blindness, moderate              | Combined DW                                                                                                                                                                                                                           |
| Motor plus cognitive impairment with epilepsy, moderate               | Combined DW                                                                                                                                                                                                                           |
| Motor plus cognitive impairment with blindness and epilepsy, moderate | Combined DW                                                                                                                                                                                                                           |
| Motor impairment with blindness, severe                               | Combined DW                                                                                                                                                                                                                           |
| Motor impairment with epilepsy, severe                                | Combined DW                                                                                                                                                                                                                           |
| Motor impairment with blindness and epilepsy, severe                  | Combined DW                                                                                                                                                                                                                           |
| Motor impairment with blindness and epilepsy, severe                  | Combined DW                                                                                                                                                                                                                           |
| Motor plus cognitive impairment with epilepsy, severe                 | Combined DW                                                                                                                                                                                                                           |
| Motor plus cognitive impairment with blindness and epilepsy, severe   | Combined DW                                                                                                                                                                                                                           |

To determine the proportion of people within each of these severity levels, one study informed moderate-to-severe impairment splits, and for mild impairments cases were divided equally into both categories.<sup>2</sup>

## Modeling strategy

Burden from each of the gestational age categories of preterm birth (extreme, very, and moderate to late) is modeled separately, using similar methods.

For a given gestational age group, an initial DisMod MR 2.2 model is run using prevalence and case fatality data. An initial DisMod MR 2.2 model is also run for all preterm births (<37 weeks). Prior to input into DisMod, case fatality ratio (CFR) data is transformed into excess mortality rate (EMR) space using the formula:

$$EMR = -\frac{\ln(1 - CFR)}{\frac{28}{365.25}}$$

which is analogous to the transformation of cumulative incidence to incidence rate. The denominator in this equation is derived from the definition of our CFR parameter, which is death in the first 28 days of life. The output from this first-step DisMod model is prevalence in the first two neonatal age groups. For this model, remission and incidence are both set to zero, as no one can be born prematurely after birth, and no one can cease to have been born premature after the fact. Study covariates were created for hospital data, US claims data, and literature sources that use non-standard gestational age categories.

### Preterm Birth <28 Weeks

| Study-level covariate                                         | Parameter        | Location level | beta                  | Exponentiated beta  |
|---------------------------------------------------------------|------------------|----------------|-----------------------|---------------------|
| Sex                                                           | Prevalence       | Global         | 0.068 (0.047 – 0.090) | 1.07 (1.05 – 1.09)  |
| Hospital data                                                 | Prevalence       | Global         | 0.010 (-2 – 1.98)     | 1.01 (0.14 – 7.24)  |
| Birth prevalence of preterm birth, gestational age < 32 weeks | Prevalence       | Global         | 1.04 (1.01 – 1.05)    | 2.82 (2.76 – 2.86)  |
| inpatient-only Marketscan, year 2010                          | Prevalence       | Global         | -2.18 (-3.89 – 0.95)  | 0.11 (0.020 – 2.58) |
| inpatient-only Marketscan, year 2012                          | Prevalence       | Global         | -1.01 (-3.95 – 1.90)  | 0.36 (0.019 – 6.71) |
| Sex                                                           | Excess Mortality | Global         | 0.11 (0.079 – 0.15)   | 1.12 (1.08 – 1.16)  |

<sup>2</sup> Hagberg et al. Acta Paediatrica 1996, 85:954-60

| Country-level covariate           | Parameter             | beta                      | Exponentiated beta |
|-----------------------------------|-----------------------|---------------------------|--------------------|
| Healthcare Access & Quality Index | Prevalence            | -0.012 (-0.014 — -0.01)   | 0.99 (0.99 — 0.99) |
| LDI (I\$ per capita)              | Excess Mortality Rate | -0.11 (-0.16 — -0.07)     | 0.90 (0.85 — 0.93) |
| Healthcare Access & Quality Index | Excess Mortality Rate | -0.013 (-0.016 — -0.0099) | 0.99 (0.98 — 0.99) |

### Preterm Birth 28-<32 Weeks

| Study-level covariate                                          | Parameter        | Location level | beta                  | Exponentiated beta  |
|----------------------------------------------------------------|------------------|----------------|-----------------------|---------------------|
| Sex                                                            | Prevalence       | Global         | 0.067 (0.051 — 0.079) | 1.07 (1.05 — 1.08)  |
| Hospital data                                                  | Prevalence       | Global         | -0.02 (-2 — 1.93)     | 0.98 (0.14 — 6.87)  |
| Birth prevalence of preterm birth, gestational age < 32 weeks  | Prevalence       | Global         | 0.45 (0.43 — 0.46)    | 1.57 (1.54 — 1.59)  |
| Birth prevalence of preterm birth, gestational age 28-37 weeks | Prevalence       | Global         | 2.20 (2.19 — 2.22)    | 9.06 (8.92 — 9.21)  |
| inpatient-only Marketscan, year 2010                           | Prevalence       | Global         | 1.30 (0.36 — 1.97)    | 3.65 (1.43 — 7.14)  |
| inpatient-only Marketscan, year 2012                           | Prevalence       | Global         | -1 (-4 — 1.99)        | 0.37 (0.018 — 7.32) |
| Sex                                                            | Excess Mortality | Global         | 0.21 (0.16 — 0.27)    | 1.24 (1.17 — 1.31)  |

| Country-level covariate           | Parameter             | beta                        | Exponentiated beta |
|-----------------------------------|-----------------------|-----------------------------|--------------------|
| Healthcare Access & Quality Index | Prevalence            | -0.0079 (-0.0097 — -0.0065) | 0.99 (0.99 — 0.99) |
| LDI (I\$ per capita)              | Excess Mortality Rate | -0.66 (-0.78 — -0.59)       | 0.51 (0.46 — 0.56) |
| Healthcare Access & Quality Index | Excess Mortality Rate | -0.0089 (-0.014 — -0.0026)  | 0.99 (0.99 — 1.00) |

### Preterm Birth <37 Weeks

| Study-level covariate | Parameter  | Location level | beta                  | Exponentiated beta |
|-----------------------|------------|----------------|-----------------------|--------------------|
| Sex                   | Prevalence | Global         | 0.066 (0.056 — 0.076) | 1.07 (1.06 — 1.08) |
| Hospital data         | Prevalence | Global         | -0.013 (-2 — 1.97)    | 0.99 (0.14 — 7.17) |

|                                                                |                  |        |                      |                     |
|----------------------------------------------------------------|------------------|--------|----------------------|---------------------|
| Birth prevalence of preterm birth, gestational age 28-37 weeks | Prevalence       | Global | 0.12 (0.11 – 0.13)   | 1.13 (1.12 – 1.14)  |
| inpatient-only Marketscan, year 2010                           | Prevalence       | Global | -0.9 (-3.6 – 1.53)   | 0.41 (0.027 – 4.60) |
| inpatient-only Marketscan, year 2012                           | Prevalence       | Global | -0.99 (-3.94 – 1.96) | 0.37 (0.019 – 7.13) |
| Sex                                                            | Excess Mortality | Global | 0.13 (0.084 – 0.18)  | 1.14 (1.09 – 1.19)  |

| Country-level covariate           | Parameter             | beta                         | Exponentiated beta |
|-----------------------------------|-----------------------|------------------------------|--------------------|
| Healthcare Access & Quality Index | Prevalence            | -0.0048 (-0.0061 – -0.0035)  | 1.00 (0.99 – 1.00) |
| LDI (I\$ per capita)              | Excess Mortality Rate | -0.47 (-0.55 – -0.41)        | 0.62 (0.58 – 0.66) |
| Healthcare Access & Quality Index | Excess Mortality Rate | -0.0051 (-0.0091 – -0.00036) | 0.99 (0.99 – 1.00) |

Using prevalence in the first two neonatal age groups, prevalence at 0-6 days, 7-27 days, and 28 days is calculated via interpolation. Functionally, this is birth prevalence minus all those who have died in the first 28 days, our case fatality parameter.

Next, using mild impairment proportion and moderate-to-severe impairment proportion data, we ran either mixed-effect hierarchical regressions or meta-analyses to generate country-year-sex-specific estimates of both parameters (we used a meta-analysis when there was not sufficient data to support a regression model). We then calculated the birth prevalence of each severity level. As mild impairment and moderate-severe impairment were calculated separately, it was possible that they could sum to a value greater than one. To address this, we checked the sum of the two values in any of the 1,000 iterations of the uncertainty analysis, and if greater than 0.9, proportionately rescaled both estimates to sum to 0.9 in any of the 1,000 iterations of the uncertainty analysis (we picked 0.9 rather than 1 to allow at least some probability of a child having no impairment). We then proceeded with the calculation of the birth prevalence of impairment:

Mild impairment birth prevalence = prevalence at 28 days \* proportion mild impairment

Moderate/severe impairment birth prevalence = prevalence at 28 days \* proportion mod-severe impairment

For moderate/severe impairment, results of these latter calculations were then combined with excess mortality estimates derived from the standard mortality ratios (SMR) of cerebral palsy and used as inputs into a second DisMod MR 2.2 model. For this model, remission and incidence were also set to zero. For

mild impairment, we assumed no excess mortality and no remission, and as such simply applied the birth prevalence of mild impairment to every age group.

No other significant changes were made to the modeling strategy for GBD 2016.

# Neonatal encephalopathy due to birth asphyxia and birth trauma

## Flowchart

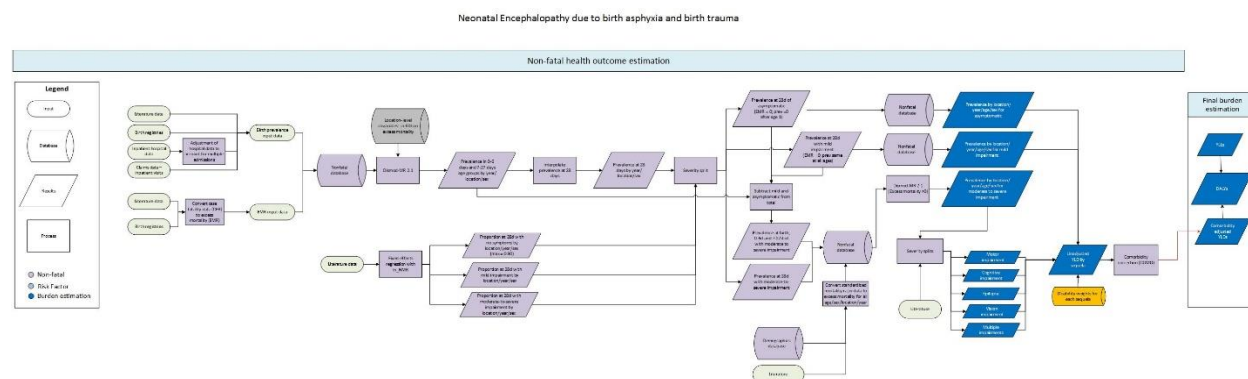

## Input data and methodological summary

### Case definition

Neonatal encephalopathy (NE) due to birth asphyxia and birth trauma, also called hypoxic-ischemic encephalopathy, is defined as injury to the brain in the first few moments or days of life in an infant born at term. NE has multiple etiologies, and is defined more by its symptoms – abnormal neurological function, including reduced level of consciousness, seizures, depression of tone and reflexes, or difficulty maintaining respiration – than its origin. NE can occur when an infant is deprived of oxygen during delivery or sustains physical trauma to the head, among other causes.

### Input data

#### Model inputs

A systematic review was completed for GBD 2010, and for GBD 2013 and GBD 2015, a review was conducted on literature published since the previous addition. The PubMed database was searched using the following search string: (((("infant"[Title/Abstract] OR "newborn"[Title/Abstract] OR "newborn infant"[Title/Abstract]) AND ("encephalopathy"[Title/Abstract] OR "neonatal encephalopathy"[Title/Abstract] OR "perinatal asphyxia"[Title/Abstract] OR "asphyxia neonatorum"[Title/Abstract] OR "newborn encephalopathy"[Title/Abstract] OR "hypoxic ischaemic encephalopathy"[Title/Abstract] OR ("birth trauma"[Title/Abstract] AND "birth asphyxia"[Title/Abstract]))) AND ("2012"[PDAT] : "3000"[PDAT]) AND "humans"[MeSH Terms])

The exclusion criteria were:

1. Studies that did not provide primary data on epidemiological parameters, e.g., a commentary piece
2. Non-representative studies (e.g., only high-risk pregnancies)
3. Reviews

The table below shows the number of literature studies included in GBD 2016, as well as the number of countries or subnational units and GBD world regions represented. No additional literature searches were done for GBD 2016.

**Table 1. Geographic representation**

|                   | Birth prevalence | Case fatality |
|-------------------|------------------|---------------|
| Studies           | 38               | 36            |
| Locations         | 27               | 25            |
| GBD world regions | 13               | 12            |

In addition to literature data, data from US claims data for 2000, 2010, and 2012 by US state were included. Only inpatient data was included from these datasets, because we believed it would be more representative of the true prevalence of neonatal encephalopathy than outpatient data: infants with neonatal encephalopathy in the countries from which hospital data was available are almost sure to be admitted to the hospital, whereas outpatient data is more likely to capture repeated visits by the same child as they grow.

*Severity splits*

The basis of the GBD disability weight (DW) survey assessments are lay descriptions of sequelae highlighting major functional consequences of symptoms. The lay descriptions and disability weights for neonatal encephalopathy birth are shown below.

**Table 2. Severity level, lay description and DWs**

| Severity level                                           | Lay description                                                                                                                                                                                                                       |
|----------------------------------------------------------|---------------------------------------------------------------------------------------------------------------------------------------------------------------------------------------------------------------------------------------|
| Motor plus cognitive impairments, mild                   | has some difficulty in moving around but is able to walk without help. The person is slow in learning at school. As an adult, the person has some difficulty doing complex or unfamiliar tasks but otherwise functions independently. |
| Motor impairment, mild                                   | has some difficulty in moving around but is able to walk without help.                                                                                                                                                                |
| Motor impairment, moderate                               | has some difficulty in moving around, and difficulty in lifting and holding objects, dressing and sitting upright, but is able to walk without help.                                                                                  |
| Motor impairment, severe                                 | is unable to move around without help, and is not able to lift or hold objects, get dressed or sit upright.                                                                                                                           |
| Distance vision blindness                                | is completely blind, which causes great difficulty in some daily activities, worry and anxiety, and great difficulty going outside the home without assistance.                                                                       |
| Motor impairment with blindness, moderate                | (combined DW)                                                                                                                                                                                                                         |
| Motor impairment with epilepsy, moderate                 | (combined DW)                                                                                                                                                                                                                         |
| Motor impairment with blindness and epilepsy, moderate   | (combined DW)                                                                                                                                                                                                                         |
| Motor plus cognitive impairment with blindness, moderate | (combined DW)                                                                                                                                                                                                                         |
| motor plus cognitive impairment with epilepsy, moderate  | (combined DW)                                                                                                                                                                                                                         |

|                                                             |               |
|-------------------------------------------------------------|---------------|
| motor plus cognitive impairment with blindness and epilepsy | (combined DW) |
| Motor impairment with blindness, severe                     | (combined DW) |
| Motor impairment with epilepsy, severe                      | (combined DW) |
| Motor impairment with blindness and epilepsy, severe        | (combined DW) |
| Motor plus cognitive impairment with blindness, severe      | (combined DW) |
| Motor plus cognitive impairment with epilepsy, severe       | (combined DW) |

\*\*For disability weights and combined disability weights, please refer to the disability weights table in the appendix.

To determine the proportion of people within each of these severity levels, one study informed moderate-to-severe impairment splits, and mild impairments cases were divided equally into both categories.<sup>3</sup>

### Modeling strategy

An initial DisMod MR 2.2 model is run using prevalence and case fatality data. Prior to input into DisMod, case fatality ratio (CFR) data is transformed into excess mortality rate (EMR) space using the formula  $EMR = -\frac{\ln(1-CFR)}{\frac{28}{365.25}}$ , which is analogous to the transformation of cumulative incidence to incidence rate.

The denominator in this equation is derived from the definition of our CFR parameter, which is death in the first 28 days of life. The output from this first-step DisMod model is prevalence in the first two neonatal age groups. For this model, remission and incidence are both set to zero, as no one can be born with encephalopathy after birth, and no one can cease to have been born with encephalopathy after the fact. Study covariates were created for hospital data and US claims data.

**Table 3**

| Study-level covariate                | Parameter  | Location level | beta                   | Exponentiated beta |
|--------------------------------------|------------|----------------|------------------------|--------------------|
| Sex                                  | Prevalence | Global         | -0.036 (-0.11 – 0.047) | 0.96 (0.89 – 1.05) |
| Inpatient-only Marketscan, year 2000 | Prevalence | Global         | 1.64 (1.44 – 1.85)     | 5.18 (4.20 – 6.39) |
| Inpatient-only Marketscan, year 2010 | Prevalence | Global         | 1.91 (1.76 – 2.00)     | 6.78 (5.84 – 7.36) |
| Inpatient-only Marketscan, year 2012 | Prevalence | Global         | 1.96 (1.85 – 2.00)     | 7.07 (6.39 – 7.38) |

<sup>3</sup> Badawi et al *Developmental Medicine & Child Neurology*, 2005, 47:293-8



|                                                                |                       |        |                       |                    |
|----------------------------------------------------------------|-----------------------|--------|-----------------------|--------------------|
| Hospital data – Central Europe, Eastern Europe, & Central Asia | Prevalence            | Global | -1.23 (-1.43 – -1.03) | 0.29 (0.24 – 0.36) |
| Sex                                                            | Excess Mortality Rate | Global | 0.16 (-0.58 – 0.93)   | 1.18 (0.56 – 2.53) |

| Country-level covariate               | Parameter             | beta                       | Exponentiated beta |
|---------------------------------------|-----------------------|----------------------------|--------------------|
| Healthcare Access & Quality Index     | Prevalence            | -0.0084 (-0.016 – -0.0012) | 0.99 (0.98 – 1.00) |
| In-Facility Delivery (proportion)     | Prevalence            | -0.34 (-0.87 – -0.02)      | 0.71 (0.42 – 0.98) |
| Skilled Birth Attendance (proportion) | Prevalence            | -0.63 (-1.47 – -0.041)     | 0.53 (0.23 – 0.96) |
| LDI (I\$ per capita)                  | Excess Mortality Rate | -0.23 (-0.37 – -0.086)     | 0.79 (0.69 – 0.92) |

Using prevalence in the first two neonatal age groups, prevalence at 28 days is calculated via interpolation. Functionally, this is birth prevalence minus all those who have died in the first 28 days, our case fatality parameter.

Next, using mild impairment proportion and moderate-to-severe impairment proportion data, we ran either mixed-effect hierarchical regressions or meta-analyses to generate country-year-sex-specific estimates of both parameters (we used a meta-analysis when there was not sufficient data to support a regression model). We then calculated the birth prevalence of each severity level. As mild impairment and moderate-severe impairment were calculated separately, it was possible that they could sum to a value greater than one. To address this, we checked the sum of the two values in any of the 1,000 iterations of the uncertainty analysis, and if greater than 0.9, proportionately rescaled both estimates to sum to 0.9 in any of the 1,000 iterations of the uncertainty analysis (we picked 0.9 rather than 1 to allow at least some probability of a child having no impairment). We then proceeded with the calculation of the birth prevalence of impairment:

Mild impairment birth prevalence = prevalence at 28 days \* proportion mild impairment

Moderate/severe impairment birth prevalence = prevalence at 28 days \* proportion mod-severe impairment

For moderate/severe impairment, results of these latter calculations were then combined with excess mortality estimates derived from the standard mortality ratios (SMR) of cerebral palsy and used as inputs into a second DisMod MR 2.1 model. For this model, remission and incidence were also set to zero. For mild impairment, we assumed no excess mortality and no remission, and as such simply applied the birth prevalence of mild impairment to every age group.

No other significant changes were made to the GBD 2016 modeling process.

# Neonatal sepsis and other neonatal infections

## Flowchart

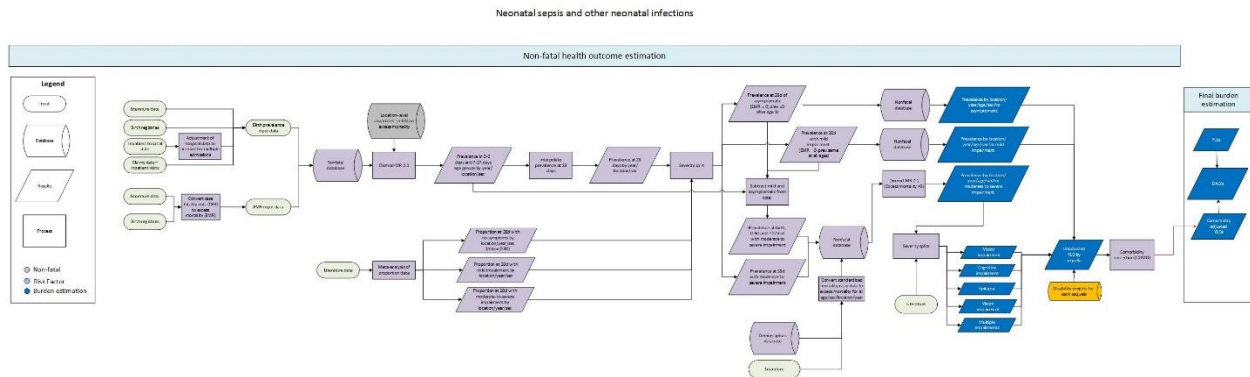

## Input data and methodological summary

### Case definition

Neonatal sepsis and other neonatal infections are infections during the neonatal period that advance to a systemic blood stream infection, the underlying cause of which can be meningitis, gastroenteritis, or other etiologies. Neonatal pneumonia, however, is not included – it is captured in our modeling of pneumonia as a separate entity. ICD codes associated with these causes include:

### Input data

#### Model inputs

A systematic review was completed for GBD 2010, and for GBD 2013 and GBD 2015, a review was conducted on literature published since the previous addition. The PubMed database was searched using the following search string: (("infant"[Title/Abstract] OR "newborn"[Title/Abstract] OR "newborn infant"[Title/Abstract]) AND ("neonatal sepsis"[All Fields] OR "neonatal septicaemia"[All Fields] OR "neonatal meningitis"[All Fields] OR "early sepsis"[All Fields] OR "early septicaemia"[All Fields] OR "tetanus"[All Fields] OR "meningitis"[All Fields] OR "sepsis"[All Fields])) AND ("2012"[PDAT] : "3000"[PDAT]) AND "humans"[MeSH Terms]

The exclusion criteria were:

1. Studies that did not provide primary data on epidemiological parameters, e.g., a commentary piece
2. Non-representative studies (e.g., only high-risk pregnancies)
3. Reviews

The table below shows the number of literature studies included in GBD 2016, as well as the number of countries or subnational units and GBD world regions represented. Please note – no literature review was conducted for GBD 2016.

**Table 1. Geographic representation**

|                   | Birth prevalence | Case fatality |
|-------------------|------------------|---------------|
| Studies           | 2                | 15            |
| Locations         | 2                | 15            |
| GBD world regions | 2                | 10            |

In addition to literature data, data from US claims data for 2000, 2010, and 2012 by US state were included. Only inpatient data was included from these datasets, because we believed it would be more representative of the true prevalence of neonatal sepsis than outpatient data: infants with neonatal sepsis in the countries from which hospital data was available are almost sure to be admitted to the hospital, whereas outpatient data is more likely to capture repeated visits by the same child as they grow. Remission was set to 26, as a cause of neonatal sepsis is assumed to last two weeks. Incidence is set to 0 after 27 days, as by definition, neonatal sepsis must occur within the neonatal period (0-27 days).

*Severity splits*

The basis of the GBD disability weight (DW) survey assessments are lay descriptions of sequelae highlighting major functional consequences of symptoms. The lay descriptions and disability weights for neonatal sepsis birth are shown below.

**Table 2. Severity level, lay description and DWs**

| Severity level                                                        | Lay description                                                                                                                                                                                                                       |
|-----------------------------------------------------------------------|---------------------------------------------------------------------------------------------------------------------------------------------------------------------------------------------------------------------------------------|
| Motor plus cognitive impairments, mild                                | has some difficulty in moving around but is able to walk without help. The person is slow in learning at school. As an adult, the person has some difficulty doing complex or unfamiliar tasks but otherwise functions independently. |
| Motor impairment, mild                                                | has some difficulty in moving around but is able to walk without help.                                                                                                                                                                |
| Motor impairment, moderate                                            | has some difficulty in moving around, and difficulty in lifting and holding objects, dressing and sitting upright, but is able to walk without help.                                                                                  |
| Motor impairment, severe                                              | is unable to move around without help, and is not able to lift or hold objects, get dressed or sit upright.                                                                                                                           |
| Distance vision blindness                                             | is completely blind, which causes great difficulty in some daily activities, worry and anxiety, and great difficulty going outside the home without assistance.                                                                       |
| Motor impairment with blindness, moderate                             | Combined DW                                                                                                                                                                                                                           |
| Motor impairment with epilepsy, moderate                              | Combined DW                                                                                                                                                                                                                           |
| Motor impairment with blindness, moderate                             | Combined DW                                                                                                                                                                                                                           |
| Motor plus cognitive impairment with blindness, moderate              | Combined DW                                                                                                                                                                                                                           |
| Motor plus cognitive impairment with epilepsy, moderate               | Combined DW                                                                                                                                                                                                                           |
| Motor plus cognitive impairment with blindness and epilepsy, moderate | Combined DW                                                                                                                                                                                                                           |
| Motor impairment with blindness, severe                               | Combined DW                                                                                                                                                                                                                           |
| Motor impairment with epilepsy, severe                                | Combined DW                                                                                                                                                                                                                           |
| Motor impairment with blindness, severe                               | Combined DW                                                                                                                                                                                                                           |

|                                                                     |             |
|---------------------------------------------------------------------|-------------|
| Motor plus cognitive impairment, severe                             | Combined DW |
| Motor plus cognitive impairment with epilepsy, severe               | Combined DW |
| Motor plus cognitive impairment with blindness and epilepsy, severe | Combined DW |
| Infection due to neonatal sepsis, severe                            | Combined DW |

\*\*For disability weights and combined disability weights, please refer to the disability weights table in the appendix.

To determine the proportion of people within each of these severity levels, one study informed moderate-to-severe impairment splits, and for mild impairments cases were divided equally into both categories.<sup>4</sup>

### Modeling strategy

For GBD 2016, we used the same modeling strategy employed for GBD 2015. The methodology is outlined below.

An initial DisMod MR 2.1 model is run using prevalence and case fatality data. Prior to input into DisMod, case fatality ratio (CFR) data is transformed into excess mortality rate (EMR) space using the formula:

$$EMR = -\frac{\ln(1 - CFR)}{\frac{28}{365.25}}$$

which is analogous to the transformation of cumulative incidence to incidence rate. The denominator in this equation is derived from the definition of our CFR parameter, which is death in the first 28 days of life. The output from this first-step DisMod model is prevalence in the first two neonatal age groups. A study covariate were created literature.

| Study-level covariate | Parameter  | Location level | beta                | Exponentiated beta |
|-----------------------|------------|----------------|---------------------|--------------------|
| Sex                   | Prevalence | Global         | 0.12 (0.068 – 0.17) | 1.12 (1.07 – 1.18) |
| Literature            | Prevalence | Global         | 1.70 (1.18 – 1.99)  | 5.47 (3.24 – 7.30) |

| Country-level covariate           | Parameter  | beta                     | Exponentiated beta |
|-----------------------------------|------------|--------------------------|--------------------|
| Healthcare Access & Quality Index | Prevalence | 0.0051 (-0.0097 – 0.020) | 1.01 (0.99 – 1.02) |

<sup>4</sup> Badawi et al Developmental Medicine & Child Neurology, 2005, 47:293-8

|                                   |                       |                           |                    |
|-----------------------------------|-----------------------|---------------------------|--------------------|
| LDI (I\$ per capita)              | Excess Mortality Rate | -0.2 (-0.49 — -0.0097)    | 0.82 (0.61 — 0.99) |
| Healthcare Access & Quality Index | Excess Mortality Rate | -0.017 (-0.04 — -0.00089) | 0.98 (0.96 — 1.00) |
| SEV Unsafe Water                  | Prevalence            | 0.12 (0.0060 — 0.39)      | 1.13 (1.01 — 1.47) |
| SEV Unsafe Sanitation             | Prevalence            | 0.12 (0.0018 — 0.45)      | 1.13 (1.00 — 1.57) |

Using prevalence in the first two neonatal age groups, prevalence at 28 days is calculated via interpolation. Functionally, this is birth prevalence minus all those who have died in the first 28 days, our case fatality parameter.

Next, using mild impairment proportion and moderate-to-severe impairment proportion data, we ran either mixed-effect hierarchical regressions or meta-analyses to generate country-year-sex-specific estimates of both parameters (we used a meta-analysis when there was not sufficient data to support a regression model). We then calculated the birth prevalence of each severity level. As mild impairment and moderate-severe impairment were calculated separately, it was possible that they could sum to a value greater than one. To address this, we checked the sum of the two values in any of the 1,000 iterations of the uncertainty analysis, and if greater than 0.9, proportionately rescaled both estimates to sum to 0.9 in any of the 1,000 iterations of the uncertainty analysis (we picked 0.9 rather than 1 to allow at least some probability of a child having no impairment). We then proceeded with the calculation of the birth prevalence of impairment:

Mild impairment birth prevalence = prevalence at 28 days \* proportion mild impairment

Moderate/severe impairment birth prevalence = prevalence at 28 days \* proportion mod-severe impairment

For moderate/severe impairment, results of these latter calculations were then combined with excess mortality estimates derived from the standard mortality ratios (SMR) of cerebral palsy and used as inputs into a second DisMod MR 2.1 model. For this model, remission and incidence were also set to zero. For mild impairment, we assumed no excess mortality and no remission, and as such simply applied the birth prevalence of mild impairment to every age group.

# Hemolytic disease and other neonatal jaundice

## Flowchart

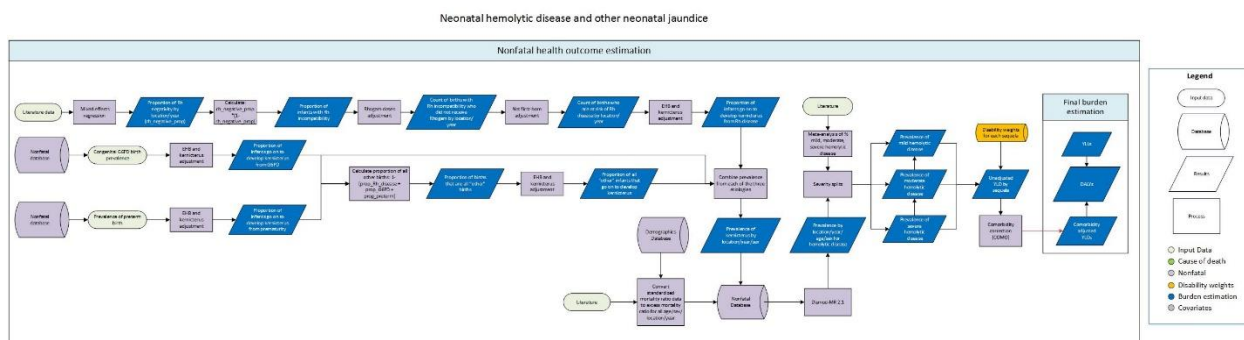

## Case definition

Hemolytic disease of the newborn and other neonatal jaundice refers to several etiologies by which an infant develops extreme hyperbilirunemia (EHB) and can then go on to develop kernicterus. The etiologies that we model for GBD are EHB from Rhesus (Rh) disease, preterm birth, glucose-6-phosphate dehydrogenase deficiency (G6PD), and other causes.

## Input data

### Model inputs

A systematic review was completed for GBD 2010, and for GBD 2013 and GBD 2015, a review was conducted on literature published since the previous addition. The PubMed database was searched using the following search string: (("infant"[Title/Abstract] OR "newborn"[Title/Abstract] OR "newborn infant"[Title/Abstract]) AND ("haemolytic"[All Fields] OR "hyperbilirubinemia"[All Fields] OR "jaundice"[All Fields] OR "glucose-6-phosphate dehydrogenase deficiency"[All Fields] OR "G6PD deficiency"[All Fields] OR "hyperbilirubinemia"[All Fields] OR "EHB"[All Fields] OR "phototherapy"[All Fields] OR "ABO incompatibility"[All Fields] OR "RH incompatibility"[All Fields] OR "rh blood group system"[All Fields] OR "Rhesus"[All Fields] OR "Rhesus disease"[All Fields] OR "erythroblastosis fetalis"[All Fields] OR "kernicterus"[All Fields])) AND ("2012"[PDAT] : "3000"[PDAT]) Sort by: PublicationDate

The exclusion criteria were:

1. Studies that did not provide primary data on epidemiological parameters, e.g., a commentary piece
2. Non-representative studies (e.g., only high-risk pregnancies)
3. Reviews

For hemolytic disease, much of the input data comes from other GBD models, which are described in detail in the “modeling strategy” section. However, the modeling process for EHB from Rh disease involves literature data for several parameters, the breadth of which are described in the tables below:

**Table 1a. Rh negativity**

|                        | Prevalence |
|------------------------|------------|
| Studies                | 48         |
| Countries/subnationals | 47         |
| GBD world regions      | 13         |

**Table 1b. Children who are not first-born**

|                        | Prevalence |
|------------------------|------------|
| Studies                | 82         |
| Countries/subnationals | 81         |
| GBD world regions      | 14         |

**Table 1c. Proportion of Preterm Infants who go on to have ROP**

|                        | Prevalence |
|------------------------|------------|
| Studies                | 32         |
| Countries/subnationals | 28         |
| GBD world regions      | 12         |

\*\*Please note that US claims data and hospital data were not included in the hemolytic disease modeling process because they are not coded separately by etiology. They could not be slotted into the existing modeling framework.

*Severity splits & disability weights*

The basis of the GBD disability weight (DW) survey assessments are lay descriptions of sequelae highlighting major functional consequences and symptoms. The lay descriptions and disability weights for hemolytic disease and other neonatal jaundice levels are shown below.

**Table 2. Severity, lay description and DWs**

| Severity level             | Lay description                                                                                                                                                 | DW (95% CI)            |
|----------------------------|-----------------------------------------------------------------------------------------------------------------------------------------------------------------|------------------------|
| Motor impairment, moderate | has some difficulty in moving around, and difficulty in lifting and holding objects, dressing and sitting upright, but is able to walk without help.            | 0.061<br>(0.04-0.089)  |
| Motor impairment, severe   | is unable to move around without help, and is not able to lift or hold objects, get dressed or sit upright.                                                     | 0.402<br>(0.268-0.545) |
| Distance vision blindness  | is completely blind, which causes great difficulty in some daily activities, worry and anxiety, and great difficulty going outside the home without assistance. | 0.187<br>(0.124-0.26)  |

To determine the proportion of people within each of these severity levels, one study informed moderate-to-severe impairment splits, and for mild impairments cases were divided equally into both categories.<sup>5</sup>

## Modeling strategy

The modeling strategy can be described as two main steps. For each of the four etiologies (Rh disease, G6PD deficiency, preterm birth, and other causes) we estimated the prevalence of extreme hyperbilirubinemia (EHB or bilirubin>25 or exchange transfusion). Then, we multiplied this prevalence by an estimated proportion of EHB cases who go on to develop kernicterus. We used development of kernicterus as our criterion for incidence of long-term moderate/severe impairment.

### Rh Disease

We began with data on the prevalence of Rh negativity in the population, the number of Rhogam (Rh<sub>0</sub> Immune Globulin) doses distributed to countries in 2010, and the proportion of children who are not firstborn. Mixed effect regressions were run on Rh negativity and birth order greater than one to generate estimates of these values for every country-year. We made the assumptions that the proportion of Rhogam doses to Rh-incompatible children stayed constant over time, and that countries with NMR<5 had complete Rhogam coverage. This yields the following equation for the prevalence of EHB in countries with NMR>5:

$$\text{EHB Prevalence} = \text{Rh negative prevalence} * (1 - \text{Rh negative prevalence}) * (2010 \text{ Rhogam doses} / 2010 \text{ Rh incompatible babies}) * (\text{not-firstborn prevalence}) * 0.15$$

The 0.15 multiplier represents results of previous calculations<sup>5</sup> showing the proportion of women developing Rh isoimmunization with a risk for anti-Rh antibodies complicating subsequent pregnancies.

Finally, to generate estimates of kernicterus prevalence, we multiplied the prevalence of EHB by 0.0072 (0.0038, 0.112) -- the proportion of children with EHB who develop kernicterus (extracted from previously published values).<sup>6,7</sup>

### G6PD, Preterm, and Other

The other three pathways of kernicterus modeling simply involve multiplication by scalars. For each of these, given a complete set of prevalence estimates from other GBD models, we multiplied by a scalar representing the proportion of children who are expected to develop EHB (see the table below for the values of these scalars). We then adjusted that estimate upward by a factor of 2.45 (1.44, 4.16) for countries in which the NMR is greater than 15, a value utilized in previous publications<sup>4</sup> to reflect heightened risk in those countries where access to phototherapy for prevention of EHB is not standard. Finally, these EHB prevalence values were multiplied by a set of NMR-dependent scalars representing the proportion of EHB cases that go on to develop kernicterus. See table below, for those values.

---

<sup>5</sup> Badawi et al. *Developmental Medicine & Child Neurology*, 2005, 47:293-8



**Table 3. EHB proportion and CIs**

| Cause                       | Source of birth prevalence estimates                                                                             | EHB proportion | 95% CI             |
|-----------------------------|------------------------------------------------------------------------------------------------------------------|----------------|--------------------|
| G6PD                        | Congenital DisMod model, GBD 2016.                                                                               | 0.0013         | (0.00085, 0.002)   |
| Preterm birth complications | Custom modeling for preterm conditions, discussed elsewhere in this document (summed over all gestational ages). | 0.00045        | (0.00029, 0.0007)  |
| Other                       | Global births – (Rh disease birth prevalence + preterm complications birth prevalence + G6PD birth prevalence)   | 0.00038        | (0.00033, 0.00163) |

**Table 4. EHB proportions used in G6PD, preterm, and other estimates.**

| NMR  | Kernicterus proportion | 95% CI         |
|------|------------------------|----------------|
| <5   | 0.23                   | (0.099, 0.361) |
| 5-15 | 0.35                   | (0.12, 0.58)   |
| >=15 | 0.438                  | (0.255, 0.621) |

Table 5: NMR-dependent kernicterus proportions applied to G6PD, preterm, and other EHB estimates.

Final Kernicterus Prevalence

We estimated preterm kernicterus in order to arrive at a proper value for the number of “other” children at risk of kernicterus but we do not actually include our preterm estimates in our measures of kernicterus since we assume that its disability is captured in our preterm models. Thus, we generate our final birth prevalence of kernicterus by:

$$\text{Kernicterus birth prevalence} = (\text{kernicterus prevalence from Rh disease}) + (\text{kernicterus prevalence from G6PD}) + (\text{kernicterus prevalence from other disorders}).$$

These estimates, along with estimates of excess mortality associated with kernicterus, are then used as inputs into our disease modeling tool (DisMod) to generate estimates of moderate to severe impairment for all ages.

No other significant changes were made to the GBD 2016 estimation process.

# Protein-energy malnutrition

## Flowchart

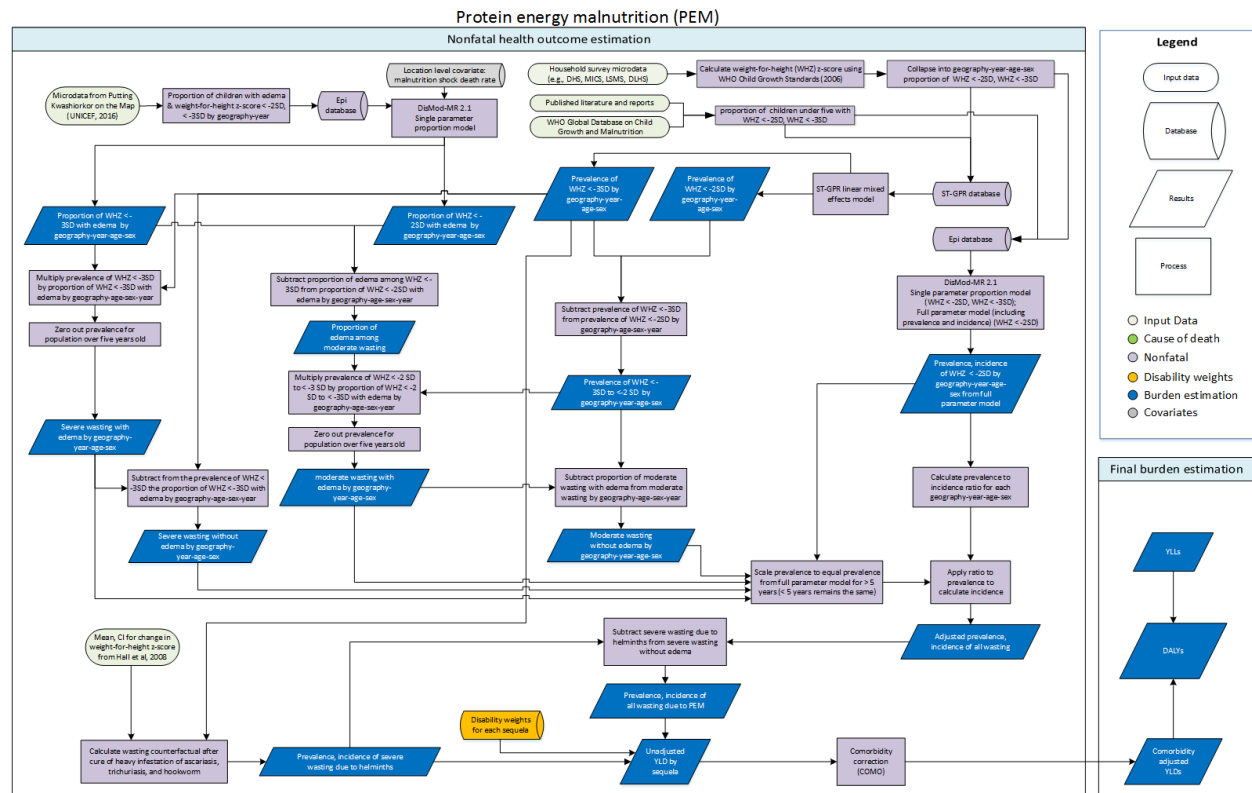

## Input data and methodological summary

### Case Definition

For protein energy malnutrition (PEM), ICD 10 codes are E40-E46.9, E64.0, and ICD 9 codes are 260-263.9. Our assessment of nonfatal PEM includes the quantification of nonfatal health loss associated with moderate and severe acute malnutrition, commonly referred to as “wasting,” and was defined in terms of weight-for-height Z-scores (WHZ) on the WHO 2006 growth standard for children. We quantified nonfatal PEM burden in four mutually-exclusive and collectively exhaustive categories, reflecting distinct gradations of disability that can occur: moderate wasting without edema (WHZ < -2SD to < -3 SD), moderate wasting **with edema** (WHZ < -2SD to < -3 SD), severe wasting without edema (WHZ < -3SD), and severe wasting **with edema** (WHZ < -3SD). The aggregate of categories that include “edema” can be considered equivalent to the disease state commonly referred to as “kwashiorkor” and severe wasting can likewise be considered equivalent to “marasmus.”

This classification reflects a moderate shift from GBD 2015, when moderate wasting without edema was not included in our nonfatal estimates, and by definition is associated with higher prevalence estimates than previously published by GBD. The other GBD 2015 categories—kwashiorkor, marasmus, and severe wasting—have unchanged case definitions, but have been renamed for clarity and consistency. This revised GBD 2016 case definition more closely aligns with other and allows for better application to the international nutrition community’s programming and estimates related to non-fatal PEM.

## Input data

The input data for this model come in three primary streams. First, we used individual-level and tabulated child anthropometry data from health surveys, literature, national reports, and centralized to inform the prevalence of WHZ decrement in each category corresponding to our case definitions. Second, to inform the proportion of children under 5 years who have signs of organ failure manifested as edema (i.e. kwashiorkor), we used a compiled dataset of surveys conducted using Standardized Monitoring and Assessment of Relief and Transitions (SMART) methods. Third, we used the cause-specific mortality rate (CSMR) results of our causes-of-death GBD analyses to inform spatiotemporal and age patterns in PEM mortality, which helped also inform patterns of PEM morbidity. These data sources and modeling process are described in other GBD publications on cause-specific mortality. All data was extracted with the most detailed standard demographic identifiers available, including age, sex, country, year, and subnational location if available.

## Modelling Strategy

We used five parallel models to inform our estimates, the first two of which were completed in ST-GPR and the second three of which were completed in DisMod-MR 2.1: 1) Prevalence of WHZ <-2 in children under 5 years, 2) Prevalence of WHZ <-3 in children under 5 years, 3) Proportion of those with WHZ <-2 who have edema in under 5 years, 4) Proportion of those with WHZ <-3 who have edema in under 5 years, and 5) Prevalence, incidence, and excess-mortality of WHZ <-2 in all ages. As a final step, we subtracted a number of cases of PEM where the underlying etiology is severe worm infestation.

The results of the first four models were used for children under 5 years. Arithmetic transformations were performed to ensure that the final results fit into the mutually-exclusive, collectively-exhaustive categories described in the first section above. We assumed zero prevalence of edema in people over 5 years old. The results of the final model were used for all age groups 5 years and older and the proportion of moderate versus severe wasting in each of those age groups was derived from the first set of models.

The final model represents the first attempt we have made in GBD to estimate incidence for PEM, for which there is comparatively little empirical data. Using available information from scientific publications, which suggest the mean duration of illness is 9 months, and conversations with collaborators and nutrition experts, we applied what we consider a plausible set of remission rate bounds of 0.25-1.25 (# of remitted cases of PEM per person-year of illness) to the final of the five models. These bounds allowed DisMod-MR 2.1 to mathematically derive an internally-consistent solution for incidence, prevalence, remission, excess mortality, and cause-specific mortality using all available data. This could only be done for the aggregate PEM definition (prevalence of WHZ <-2) to ensure that the case definition for prevalence matched that of the mortality results. The incidence-to-prevalence ratio derived from the final model was applied equally across all the categories of nonfatal PEM. Future work in systematically

evaluating longitudinal datasets on nutrition and growth failure will allow us to improving the empirical basis for PEM incidence estimates, including improved resolution for the component categories.

We applied disability weights from the GBD disability weight survey to the prevalence of the above sequela according to their corresponding health state and severity level. The sequela, along with their lay descriptions and disability weights for health states derived from the GBD Disability Weights study are shown below. We assumed that those with moderate wasting, but no edema, did not have any direct disability due to this condition.

**Table 1. Sequela, severity, lay description, and DWs**

| Sequela                               | Health State Name            | Lay description                               | DW (95% CI)            |
|---------------------------------------|------------------------------|-----------------------------------------------|------------------------|
| <b>Moderate Wasting without Edema</b> | Asymptomatic                 | --                                            | --                     |
| <b>Moderate Wasting with Edema</b>    | Kwashiorkor                  | Is very tired and irritable and has diarrhea. | 0.051<br>(0.031-0.079) |
| <b>Severe Wasting without Edema</b>   | Severe wasting               | Is extremely skinny and has no energy.        | 0.128<br>(0.082-0.183) |
| <b>Severe Wasting with Edema</b>      | Kwashiorkor + Severe wasting | Is very tired and irritable and has diarrhea. | 0.051<br>(0.031-0.079) |
|                                       |                              | Is extremely skinny and has no energy.        | 0.128<br>(0.082-0.183) |

Because both worms and PEM can cause wasting, we needed to divide out the wasting envelope to attribute wasting to both PEM and worms. We determined the amount of wasting attributable to worms by referencing Hall et al. 2008<sup>6</sup> to determine the mean and confidence interval estimates of the z-score shift. We then calculated the counterfactual wasting prevalence given no worms, according to the z-score shift. From this, we calculated the fraction of wasting that is attributable to worms, and assigned the remainder of wasting to PEM. We assumed no edema due to worms and the same prevalence-to-incidence ratio as in each of the other models.

Following the assignment of disability weights to the various sequelae, the resulting disability adjusted life years (YLDs) go through the comorbidity simulator, which accounts for any comorbidity and corrects accordingly. The final outputs are comorbidity adjusted YLDs, which are combined with years of life lost (YLLs) for final disability-adjusted life years (DALYs).

---

<sup>6</sup> Hall A, Hewitt G, Tuffrey V, de Silva N. A review and meta-analysis of the impact of intestinal worms on child growth and nutrition. *Maternal and Child Nutrition*. 2008. 4. 118-236.

# Iodine deficiency

## Flowchart

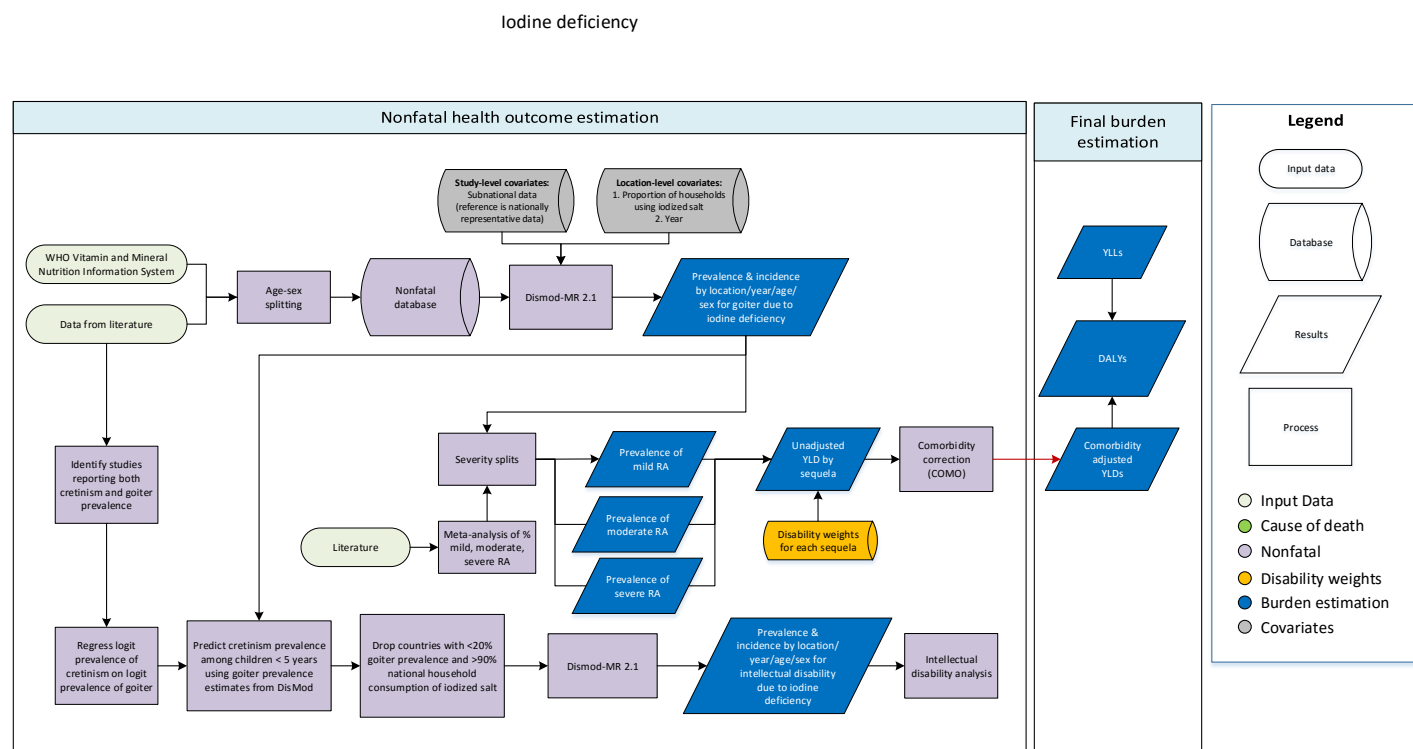

## Input data and methodological summary

### Case definition

Our assessment of the nonfatal burden of iodine deficiency includes estimates of only the subset of iodine deficiency associated with visible goiter (grade 2) and its associated sequelae, including thyroid dysfunction, heart failure, and intellectual disability (historically referred to as “cretinism”). It does not include estimates of sub-clinical iodine deficiency or non-visible goiter (grade 1) induced by iodine deficiency. Expanding to include all forms of subclinical iodine deficiency is a goal of future iterations of GBD analyses. The corresponding ICD-10 codes from the causes of death analysis for iodine deficiency are E00-E02. Further details of mortality modeling can be found in the GBD 2016 cause-specific mortality publication.

### Input data

For GBD 2016, data from the WHO Vitamin and Mineral Nutrition Information System and published studies were used. This extraction and an accompanying systematic review were last conducted for GBD 2013. The PubMed search terms were: ((iodine deficiency[Title/Abstract] AND prevalence[Title/Abstract]) AND (“2009”[Date – Publication] : “2013”[Date – Publication]))

The exclusion criteria were:

30. Studies that were not population-based, eg, hospital or clinic-based studies
31. Studies that did not provide primary data on epidemiological parameters, eg, commentaries
32. Review articles
33. Case series
34. Self-reported cases

Updates to systematic reviews are performed on an ongoing schedule across all GBD causes; an update for iodine deficiency will be performed in the next one to two iterations. The table below shows the number of literature studies included in GBD 2016, as well as the number of countries or subnational units and GBD world regions represented.

**Table 1. Geographic representation**

|                        | Prevalence | Incidence | Mortality risk |
|------------------------|------------|-----------|----------------|
| Studies                | 25         | -         | -              |
| Countries/subnationals | 8          | -         | -              |
| GBD world regions      | 5          | -         | -              |

### Modelling strategy

For GBD 2016, we modelled the prevalence of grade 2 goiter in DisMod-MR 2.1. We chose to model grade 2 goiter over grade 1 goiter because of the greater reliability and consistency of the clinical diagnosis of grade 2 goiter worldwide. We used a study-level covariate to indicate national and subnational observations, where nationally representative studies were set as the reference category. We used household iodized salt consumption proportion as a country-level covariate.

We estimated the prevalence of intellectual disability due to iodine deficiency (cretinism) by regressing data points from studies reporting both cretinism and goiter prevalence in the same population. To do so, we first transformed cretinism prevalence and goiter prevalence into logit space, regressed the logit prevalence of cretinism on the logit prevalence of goiter, and predicted for all locations using the goiter estimates from the DisMod model above. We dropped locations with total goiter prevalence less than 20% and locations with household iodized salt consumption greater than 90%. We kept observations in children younger than 5 years and use these data as incidence input in DisMod to generate location-year-age-sex-specific estimates. We assumed zero remission as the disease is a lifelong condition, and zero incidence after age 5. We repeated the dropout criteria of total goiter prevalence and iodized salt consumption on the DisMod output. The severity split for intellectual disability due to iodine deficiency is presented separately in the section for intellectual disability.

Heart failure attributable to iodine deficiency was modelled separately, and the methods for this outcome are presented separately in the section for heart failure and its etiologies.

Betas and exponentiated values (which can be interpreted as an odds ratio) for the grade 2 goiter DisMod model are shown in the table below.

**Table 2. Beta and exponentiated beta values**

| Covariate                                     | Parameter  | beta                 | Exponentiated beta |
|-----------------------------------------------|------------|----------------------|--------------------|
| Proportions of households using iodized salts | Prevalence | -0.55 (-0.60, -0.41) | 0.58 (0.55, 0.66)  |
| Subnational                                   | Prevalence | 0.50 (0.48, 0.50)    | 1.64 (1.62, 1.65)  |
| Sex                                           | Prevalence | -0.63 (-0.85, -0.42) | 0.53 (0.43, 0.66)  |

### Severity splits & disability weights

Our approach to apportioning cases of grade 2 goiter was modified in GBD 2016 to improve internal consistency of YLD estimates. The primary change was that in GBD 2015, each of the types of symptoms (heart failure, thyroid dysfunction, intellectual disability) were considered to be mutually-exclusive, but recognizing they are not, we constructed independent joint probabilities for each. Initial severity proportions have not changed since GBD 2010: visible goiter without symptoms of thyroid dysfunction (proportion=0.915, 95% confidence interval (CI): 0.904-0.926); goiter with symptoms of thyroid dysfunction (proportion=0.085, 95% confidence interval (CI): 0.084-0.086). The regression results for intellectual disability (ID) were applied to the total estimates of iodine deficiency. All of those with ID were assumed to have symptoms of thyroid dysfunction. Heart failure due to iodine deficiency, which was estimated separately, was assumed to only occur in the subset of persons with profound ID.

The lay descriptions and disability weights for severity levels derived from the GBD Disability Weights study are shown below.

**Table 3. Severity, health state, lay description, and DWs for sequelae specific to iodine deficiency**

| Severity level                  | Health state           | Lay description                                                                                                                                          | DW (95% CI)            |
|---------------------------------|------------------------|----------------------------------------------------------------------------------------------------------------------------------------------------------|------------------------|
| Visible goiter without symptoms | Disfigurement, level 2 | Has a visible physical deformity that causes others to stare and comment. As a result, the person is worried and has trouble sleeping and concentrating. | 0.067<br>(0.044–0.096) |
| Visible goiter with symptoms    | Goiter                 | Has a large mass in the front of the neck. The person sometimes has weakness and fatigue, constipation and weight gain.                                  | 0.199<br>(0.133–0.276) |

No other significant changes were made to the modelling strategy for GBD 2016.

# Vitamin A deficiency

## Flowchart

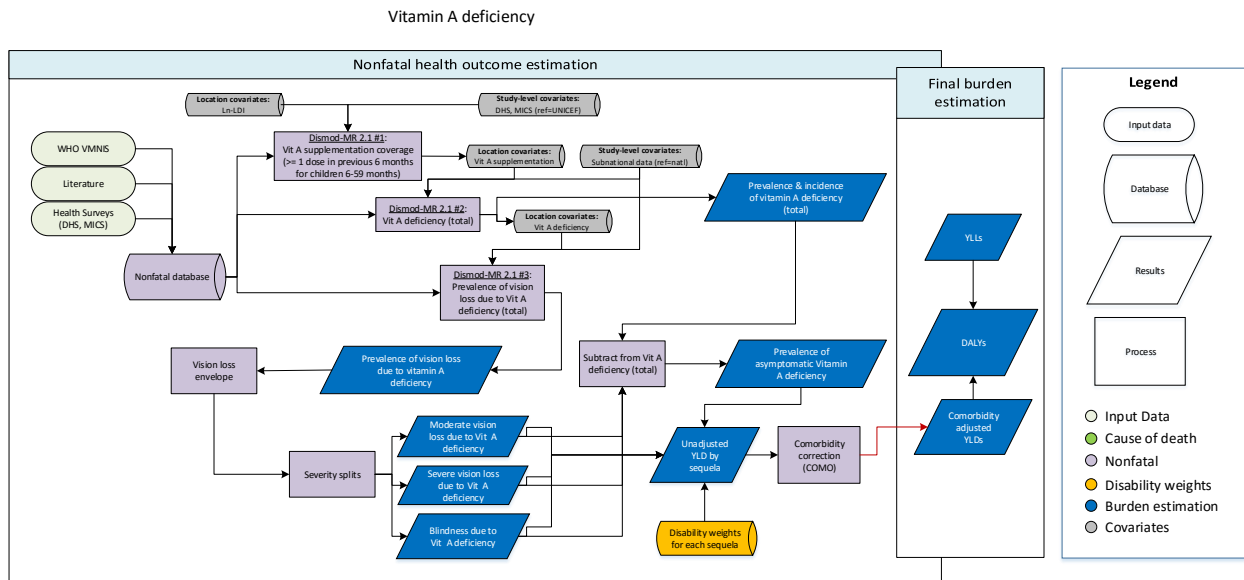

## Input data and methodological summary

### Case definition

For GBD 2016, the case assessment of vitamin A deficiency involves the quantification of total Vitamin A deficiency (serum retinol < 0.7  $\mu\text{mol/L}$ ) as well as blindness and vision loss due to Vitamin A deficiency, which are associated with corneal ulcerations and corneal scars. ICD 10 codes are E50-E50.9, E64.1, and ICD 9 codes are 264-264.9.

To ensure we were using as much information as possible, and therefore maximize the data basis of our estimates, we modeled Vitamin A deficiency sequentially. The first step was to estimate the coverage of Vitamin A supplementation. Although the typical metric on which supplementation is tracked is 2+ doses of Vitamin A in the previous 12 months for children under 5 years, most existing health surveys do not routinely provide sufficient information to calculate it. Our case definition for the supplementation model was therefore the proportion of children 6-59 months of age who received at least one dose of Vitamin A in the previous 6 months. Supplementation estimates were then used as a location-level covariate to guide incidence and prevalence models of overall Vitamin A deficiency, which was subsequently used as a location-level covariate to guide prevalence estimates of vision loss due to Vitamin A deficiency. The difference between total Vitamin A deficiency and vision loss due to Vitamin A deficiency is considered asymptomatic. Total Vitamin A deficiency is separately considered as a risk factor in the GBD 2016 comparative risk assessment analysis.

### Input data

For GBD 2016, we used data from the WHO Vitamin and Mineral Nutrition Information System, health surveys such as DHS and MICS, and studies identified through literature review. A systematic review was last conducted for GBD 2013. The PubMed search terms were: ((vitamin A deficiency[Title/Abstract])



AND prevalence[Title/Abstract]) AND (“2009”[Date – Publication] : “2013”[Date – Publication])). The table below shows the number of data points included in the final datasets. Exclusion criteria were:

1. Studies that were not population-based, e.g., hospital or clinic-based studies
2. Studies that did not provide primary data on epidemiological parameters, e.g., commentaries
3. Review articles
4. Case series
5. Self-reported cases

Table 1. Geographic representation of datasets used for three stages of Vitamin A deficiency nonfatal burden estimation (number of data points per location)

| Location                     | Supplementation (proportion) | Deficiency (prevalence) | Vision Loss (Relative risk) | Vision Loss (prevalence) |
|------------------------------|------------------------------|-------------------------|-----------------------------|--------------------------|
| Global                       | 900                          | 365                     | 1                           | 81                       |
| East Asia                    | 12                           | 10                      |                             |                          |
| Southeast Asia               | 102                          | 45                      |                             | 21                       |
| Oceania                      | 24                           | 18                      |                             |                          |
| Central Asia                 | 51                           | 31                      |                             |                          |
| Central Europe               | 2                            | 1                       |                             |                          |
| Australasia                  |                              | 1                       |                             |                          |
| Southern Latin America       |                              | 1                       |                             |                          |
| High-income North America    |                              | 4                       |                             |                          |
| Caribbean                    | 17                           | 12                      |                             | 1                        |
| Andean Latin America         | 25                           | 10                      |                             |                          |
| Central Latin America        | 33                           | 54                      |                             | 1                        |
| Tropical Latin America       | 1                            | 2                       |                             | 2                        |
| North Africa and Middle East | 49                           | 37                      |                             | 18                       |
| South Asia                   | 61                           | 21                      |                             | 21                       |
| Central Sub-Saharan Africa   | 60                           | 9                       |                             | 1                        |
| Eastern Sub-Saharan Africa   | 182                          | 63                      |                             | 10                       |
| Southern Sub-Saharan Africa  | 49                           | 15                      |                             | 1                        |
| Western Sub-Saharan Africa   | 232                          | 31                      |                             | 5                        |

### Modelling strategy

All Vitamin A deficiency estimates were made using DisMod-MR 2.2. As described above, we first estimated Vitamin A supplementation coverage. Although all data was from ages 6-59 months, we assumed no difference in age pattern of supplementation coverage and used the natural log of lag-distributed income per capita (LN-LDI) as a location-level covariate to inform estimates where data was absent. DHS and MICS data was cross-walked to the reference data source, which came from UNICEF (<http://data.worldbank.org/indicator/SN.ITK.VITA.ZS>).

Table 2: Covariate effects for Vitamin A supplementation model

| Measure    | Covariate | Type        | Value | Exponentiated |
|------------|-----------|-------------|-------|---------------|
| Prevalence | MICS      | Study-level | -0.59 | 0.56          |

|            |                      |               |                             |                       |
|------------|----------------------|---------------|-----------------------------|-----------------------|
|            |                      |               | (-0.73 — -0.42)             | (0.48 — 0.65)         |
| Prevalence | DHS                  | Study-level   | -0.092<br>(-0.22 — 0.038)   | 0.91<br>(0.80 — 1.04) |
| Prevalence | LDI (I\$ per capita) | Country-level | 0.0094<br>(0.00061 — 0.039) | 1.01<br>(1.00 — 1.04) |

Second, we estimated the age- and sex-specific prevalence of Vitamin A deficiency (serum retinol < 0.7  $\mu\text{mol/L}$ ). WHO VMNIS was the primary data source for this model and was supplemented with data from DHS and other health surveys where testing was performed. We assumed the following in our model: no excess mortality, birth prevalence is possible, and that incidence and remission are both decreasing after age 5. Incidence estimates were therefore derived from the changing age pattern of prevalence with some allowance for remission. Data from subnational locations was crosswalked to the reference data sources of nationally-representative data. Females were found to have 1.09 times higher Vitamin A deficiency, although the uncertainty in that ratio ranged from 0.97 to 1.24. Location-level covariates were used for Vitamin A supplementation coverage from the above model as well as GBD 2016 Socio-demographic Index (SDI) numbers.

Table 3: Covariate effects for Vitamin A deficiency model

| Measure    | Covariate             | Type          | Value                     | Exponentiated          |
|------------|-----------------------|---------------|---------------------------|------------------------|
| Prevalence | Sex                   | Study-level   | 0.086<br>(-0.027 — 0.21)  | 1.09<br>(0.97 — 1.24)  |
| Prevalence | Subnational           | Study-level   | 0.00074<br>(-0.15 — 0.17) | 1.00<br>(0.86 — 1.19)  |
| Prevalence | Vit A suppl. coverage | Country-level | -0.38<br>(-0.71 — -0.099) | 0.68<br>(0.49 — 0.91)  |
| Prevalence | SDI                   | Country-level | -2.25<br>(-2.87 — -1.36)  | 0.10<br>(0.057 — 0.26) |

Third, for models of prevalence of blindness and vision loss due to vitamin A deficiency, this was run as a single-parameter meta-regression on prevalence, so incidence estimates were not generated. Data from subnational locations was crosswalked to the reference data sources of nationally-representative data. Vitamin A deficiency prevalence was used as a location-level covariate. Two covariates that were used in GBD 2015 were removed in the GBD 2016 models. These were 1) proportion of children who are underweight and 2) year. The first was removed to eliminate a modeling circularity where, because of timing of processes, the only available results for this covariate at time of modeling Vitamin A deficiency were from the previous round of GBD estimation. The second was removed because it functionally assumes a fixed time trend in the prevalence of vision loss, which may not be the case everywhere.

Table 4: Covariate effects for Vision loss due to Vitamin A deficiency model

| Measure    | Covariate   | Type        | Value                   | Exponentiated         |
|------------|-------------|-------------|-------------------------|-----------------------|
| Prevalence | Sex         | Study-level | 0.040<br>(-1.44 — 1.53) | 1.04<br>(0.24 — 4.60) |
| Prevalence | Subnational | Study-level | 0.19                    | 1.20                  |

|                   |                                 |               |                        |                       |
|-------------------|---------------------------------|---------------|------------------------|-----------------------|
|                   |                                 |               | (0.0069 — 0.46)        | (1.01 — 1.59)         |
| <b>Prevalence</b> | Vit A Def Prev<br>(age-stdized) | Country-level | 1.10<br>(0.054 — 1.96) | 3.00<br>(1.06 — 7.08) |

### Severity splits and disability weights

Our GBD 2016 results include explicit estimates of total Vitamin A deficiency, although those without vision loss are assumed to be asymptomatic. Description of how our estimates of total vision loss described above are parsed into moderate vision loss, severe vision loss, and blindness can be found in the modeling description for the “vision loss impairment”. Sequelae and corresponding disability weights for each of the health states associated with Vitamin A deficiency are shown in the table below.

Table 5. Severity, lay description and Disability Weight (DW)

| Severity level                           | Lay description                                                                                                                                                                | DW (95% CI)            |
|------------------------------------------|--------------------------------------------------------------------------------------------------------------------------------------------------------------------------------|------------------------|
| <b>Asymptomatic Vitamin A deficiency</b> |                                                                                                                                                                                | 0                      |
| <b>Moderate vision loss</b>              | Has vision problems that make it difficult to recognize faces or objects across a room.                                                                                        | 0.031<br>(0.019-0.049) |
| <b>Severe vision loss</b>                | Has severe vision loss, which causes difficulty in daily activities, some emotional impact (for example worry), and some difficulty going outside the home without assistance. | 0.184<br>(0.125-0.259) |
| <b>Blindness</b>                         | Is completely blind, which causes great difficulty in some daily activities, worry and anxiety, and great difficulty going outside the home without assistance.                | 0.187<br>(0.124-0.26)  |

## Other nutritional deficiencies

Other nutritional deficiencies encompass a wide variety of causes of morbidity, ranging from vitamin deficiencies to other nutritional anemias. GBD 2016 treats these causes as a single category, given their relatively limited burden, diversity in underlying causes and risk factors, and data availability. Instead of modeling them in a traditional modeling format, we calculate the YLDs associated with other nutritional deficiencies using a YLD/YLL ratio.

The first input for this non-fatal portion of other nutritional deficiencies burden is the YLL estimates from the GBD 2016 causes of death (CoD) analysis. The causes and their associated ICD-10 codes that constitute other nutritional deficiencies for CoD are listed below. Additionally, CoD includes specific models for Protein Energy Malnutrition, another nutritional cause of morbidity and mortality; as Protein Energy Malnutrition has a specific non fatal model that results in YLDs, we can calculate the YLD/YLL ratio for Protein Energy Malnutrition. We multiply the YLL estimates for other nutritional deficiencies from CoD by the YLD/YLL ratio for PEM, providing us with an estimate of the YLDs associated with other nutritional deficiencies.

| GBD cause                      | ICD-10 code                                                                                                                                                                             |
|--------------------------------|-----------------------------------------------------------------------------------------------------------------------------------------------------------------------------------------|
| Other nutritional deficiencies | D51-D52.0 (vitamin B12 deficiency anemia and folate deficiency anemia)                                                                                                                  |
| Other nutritional deficiencies | D52.8-D53.9 (other nutritional anemias)                                                                                                                                                 |
| Other nutritional deficiencies | D64.3 (other sideroblastic anemias)                                                                                                                                                     |
| Other nutritional deficiencies | E51-E61.9 (thiamine, niacin, other B group vitamins, ascorbic acid, vitamin D, other vitamin, dietary calcium, dietary selenium, dietary zinc, and other nutrient element deficiencies) |
| Other nutritional deficiencies | E63-E64.0 (other nutritional deficiencies and sequelae of protein-calorie malnutrition)                                                                                                 |
| Other nutritional deficiencies | E64.2-E64.9 (sequelae of vitamin C deficiency, rickets, other nutritional deficiencies, and unspecified nutritional deficiencies)                                                       |
| Other nutritional deficiencies | M12.1-M12.19 (Kaschin-Beck disease)                                                                                                                                                     |

# Sexually transmitted infections (STIs), excluding HIV: Chlamydia, gonorrhea, trichomonas, genital herpes due to HSV-2, syphilis (early infection and adult tertiary syphilis), and other STIs

## Flowchart

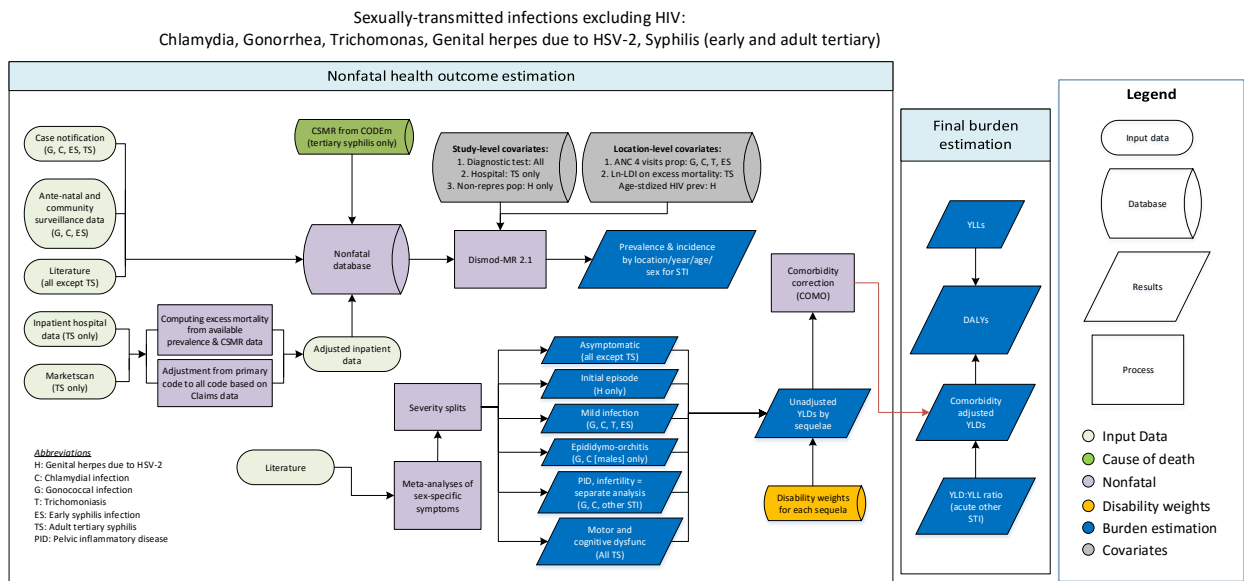

## Input data and methodological summary

### Case definition

For GBD 2016, we estimated the prevalence and incidence of genital and reproductive tract infection with several common sexually transmitted infections, including *Chlamydia trachomatis*, *Neisseria gonorrhoea*, *Trichomonas vaginalis*, *Treponema pallidum* (syphilis), and genital herpes associated with seroprevalent HSV-2. Separate estimates were completed for early syphilis and adult tertiary syphilis. ICD-9 and ICD-10 codes associated with each cause in the GBD 2016 cause-specific mortality analyses are listed below. Of note, mortality was assumed to be zero in trichomoniasis and genital herpes infection, and YLDs due to congenital syphilis were not estimated.

**Table 1. International classification of diseases codes for sexually transmitted infections in GBD 2015 cause of death analysis**

| Condition                                      | ICD10 code                                        | ICD9 code       |
|------------------------------------------------|---------------------------------------------------|-----------------|
| Sexually transmitted infections (STI) excl HIV | A50-A60, A63-A64, I98.0, K67.0-K67.2, M73.0-M73.1 | 090-099,131,614 |
| <u>Syphilis</u>                                | A50-A53, I98.0, K67.0-K67.2, M73.0-M73.1          | 090-097         |
| Congenital syphilis                            | A50                                               | 090             |
| Early syphilis                                 | A51                                               | 091             |

|                         |                         |                            |
|-------------------------|-------------------------|----------------------------|
| Adult tertiary syphilis | A52, I98.0              | 093-095                    |
| Chlamydial infection    | A55-A56, K67.0          | 099.41, 099.5              |
| Gonococcal infection    | A54, K67.1              | 098                        |
| Trichomoniasis          | A59, K67.0              | 131                        |
| Genital herpes          | A60                     | 054.1                      |
| Other STI               | A57-A58, A63-A64, M73.0 | 099 (except 099.41, 099.5) |

## Input data

### *Model inputs*

Systematic literature reviews were completed on April 17, 2015, for chlamydia, gonorrhea, trichomonas, genital herpes, and early syphilis. Three related search strings were used as many studies report on multiple infections. With the exception of the early syphilis literature review, which was completed in GBD 2015, these were the same search strings and strategies as were employed in GBD 2013.

**462 initial hits; 54 sources selected for full text review and data extraction:** (((chlamydia[Title/Abstract] OR chlamydia tracomatis[Title/Abstract] OR trachoma[Title/Abstract]) AND prevalence[Title/Abstract]) AND ('2013'[Date - Publication] : '2015'[Date - Publication])) /// ((gonorrhea[Title/Abstract] OR Neisseria[Title/Abstract] OR gonococcal[Title/Abstract]) AND prevalence[Title/Abstract]) AND ("2013"[PDAT] : "2015"[PDAT]) /// ((trichomonal[Title/Abstract] OR trichomonas[Title/Abstract]) AND prevalence[Title/Abstract]) AND ('2013'[PDAT] : '2015'[PDAT])

**1265 initial hits; 178 sources selected for full text review and data extraction:** ("syphilis"[MeSH] OR "Treponema pallidum"[MeSH]) NOT "Yaws"[MeSH] AND "prevalence"[MeSH] AND "1990"[PDAT] : "2015"[PDAT] AND "humans"[MeSH] /// ("syphilis"[MeSH] OR "Treponema pallidum"[MeSH]) NOT "Yaws"[MeSH] AND ("incidence"[MeSH]) AND ("1990"[PDAT] : "2015"[PDAT]) AND "humans"[MeSH]

**13 initial hits; 1 selected for full text review and data extraction:** herpes"[Title/Abstract] OR "Herpesvirus 2, Human"[Mesh]) AND ("Prevalence"[Title/Abstract] OR "Incidence"[Title/Abstract] AND ("2015"[PDAT] : "2015"[PDAT])

The genital herpes dataset was supplemented by those sources contained in recent published estimates completed by Looker and colleagues.<sup>1,2</sup> For all other STI, most notably early syphilis, we supplemented our datasets with manual search of national ministry of health websites, antenatal clinic surveillance reports, and case-notification data from locations where centralized reporting is mandatory.

To be included, a study must report on laboratory-confirmed diagnosis of an STI. For each STI, the reference category for diagnostic modality was a DNA-based test (eg, PCR or other nucleic acid amplification test) and data using any other diagnostic test were quantitatively crosswalked to the reference category using binary study-level covariates in DisMod-MR 2.1 For genital herpes, any sources that did not use nucleic acid amplification were excluded.

For early syphilis, crosswalks were performed in a country-specific manner because non-treponemal false-positive rate is dependent on several epidemiological factors, including age, sex, and endemicity of other infections. Given the potential variability in immunological reasons for false positives in each of the other STI categories, we also did not perform any adjustment for published sensitivity and specificity of

tests, as these results are often drawn from particular populations that may not be representative of the global experience for each infection.

For all STI, including genital herpes, sources were excluded if the sample population was drawn exclusively from a high-risk group (eg, HIV-positive, men who have sex with men [MSM], or sex workers).

All surveillance data were considered prevalence when modeling chlamydia and gonorrhoea, and all data were considered prevalence when modeling early syphilis.

Data were outliered or excluded if we found them unreasonable when compared to regional, super-regional, and global rates. These data included European surveillance data, much of which was unreasonably low.

Composition of final datasets are shown below for each of the different STI models.

### Gonococcal infection

|                        | Prevalence | Incidence |
|------------------------|------------|-----------|
| Studies                | 177        | 5         |
| Countries/subnationals | 75/240     | 3         |
| GBD world regions      | 20         | 3         |

### Chlamydial infection

|                        | Prevalence | Incidence |
|------------------------|------------|-----------|
| Studies                | 203        | 2         |
| Countries/subnationals | 93/221     | 1/0       |
| GBD world regions      | 21         | 1         |

### Early syphilis

|                        | Prevalence |
|------------------------|------------|
| Studies                | 409        |
| Countries/subnationals | 167/155    |
| GBD world regions      | 21         |

### Adult tertiary syphilis

|                        | Prevalence |
|------------------------|------------|
| Studies                | 34         |
| Countries/subnationals | 17/127     |
| GBD world regions      | 7          |

### Trichomoniasis infection

|         | Prevalence |
|---------|------------|
| Studies | 115        |

|                        |       |
|------------------------|-------|
| Countries/subnationals | 62/18 |
| GBD world regions      | 20    |

## Genital herpes

|                        | Prevalence | Incidence |
|------------------------|------------|-----------|
| Studies                | 269        | 20        |
| Countries/subnationals | 72/38      | 12/8      |
| GBD world regions      | 20         | 7         |

## Modelling strategy

Overall, we have made no substantive changes to the estimation strategy since GBD 2015. We estimated the nonfatal burden of STI in three parts. For the first part we estimated the prevalence, incidence, remission, and case fatality from acute infection associated with gonococcus, chlamydia, trichomoniasis, genital herpes (from herpes simplex virus 2), early syphilis, and adult tertiary syphilis using the data above and DisMod-MR 2.1. Not all cases of STI are symptomatic, so we used literature review to guide splitting prevalent cases into asymptomatic and symptomatic health states.<sup>3,4</sup> Specific modelling considerations in DisMod-MR 2.1 for each STI are described below.

The second part, which is estimation of prevalence, incidence, remission and case fatality from pelvic inflammatory disease (PID) and PID-induced primary and secondary infertility, is described in a separate section on those conditions. Briefly, for PID we used ICD-9 and ICD-10 coded discharge datasets, MarketScan claims database, and systematic literature review to develop a dataset that was subsequently modelled for all locations using DisMod-MR 2.1. Processing steps for discharge and claims data are described separately. PID was then split into underlying etiologies (chlamydia, gonorrhea, and other) using results of supplemental literature review and DisMod-MR 2.1 models of the proportion due to each etiology. PID-induced primary and secondary infertility assuming only a fixed subset of incident PID cases develop infertility and that there is no remission in these cases.

The third and final part involved finding the ratio of YLD to YLL ratio for all STI (excluding other STI) and then applying that same ratio to other STI YLLs.

### Gonococcal infection

Prevalence data were the primary input from literature, case notification systems, and surveillance. Incidence was restricted to occur only between ages 10 and 69. EMR was set to have a maximum value of 0.0001. Remission rate bounds were set to be between 2 and 5 (translating to a duration of 10 to 26 weeks), and are the same as we used in GBD 2015, GBD 2013, and GBD 2010.<sup>3,4</sup> Study covariates included crosswalks for data where case diagnosis was based on culture or other non-nucleic acid amplification tests (PCR is the gold-standard diagnostic method). Surveillance/notification data were also crosswalked against the reference definition. Female-to-male ratio of prevalence and incidence was restricted to not exceed 2.01:1, an approach that was used to account for relatively sparse data from males. Coverage proportion of four visits of antenatal care coverage (ANC4) was the only country covariate and was assigned to prevalence.



We assigned the proportion of persons who developed symptoms of infection and/or epididymo-orchitis. Both were unchanged from GBD 2010 and are the same as used in WHO analyses. Males were assigned a fixed proportion of each of the following health states. Epididymo-orchitis differed for locations with long time series of high-quality vital registration data (“data-rich”) compared to locations with poor data (“all others”). This split was performed for developed versus developing countries in GBD 2013 and GBD 2010. Data-rich proportion was 0.03 (0.015–0.045) and all others was 0.0975 (0.0483–0.143). A proportion of the remainder, 0.5875 (0.5288–0.6463), were assigned a health state of mild, acute infectious disease. The remainder were assumed to be asymptomatic. Females were estimated to have a proportion with mild, acute infectious disease of 0.34 (0.306–0.374) and the remainder asymptomatic.<sup>3,4</sup> Females have fewer symptoms of gonorrhoea than males, which results in higher YLDs among males, despite a lower number of cases.

### Gonococcal infection

| Study-level covariate | Parameter  | Location level | beta                          | Exponentiated beta |
|-----------------------|------------|----------------|-------------------------------|--------------------|
| Sex                   | prevalence | Global         | 0.37 (0.30 – 0.70)            | 1.45 (1.29 – 2.01) |
| Culture-positive      | prevalence | Global         | -0.0054 (-0.039 to -0.000071) | 0.99 (0.96 – 1.00) |
| Diagnosis other       | prevalence | Global         | -0.0063 (-0.051 to -0.00019)  | 0.99 (0.95 – 1.00) |

| Country-level covariate                         | Parameter  | beta                          | Exponentiated beta |
|-------------------------------------------------|------------|-------------------------------|--------------------|
| Antenatal Care (4 visits) Coverage (proportion) | prevalence | -0.021 (-0.098 to -0.0000033) | 0.98 (0.91 – 1.00) |

### Chlamydial infection

Chlamydia estimation methods were the same as used for gonococcal infection described above, with a few exceptions. Remission bounds were set between 0.5 and 0.9599, and the female-to-male sex ratio of prevalence and incidence was restricted to not exceed 1.35:1. The proportion of antenatal care coverage (4 visits) was applied as a country-level covariate.

The approach to estimating sequelae was the same as for gonorrhoea, although the proportions in each state were different. Data- rich proportion was 0.02 (0.01–0.03) and all others was 0.0625 (0.0325–0.0975). A proportion of the remainder, 0.505 (0.4545–0.5555), were assigned a health state of mild, acute infectious disease. The remainder were assumed to be asymptomatic. Females were estimated to have proportion with mild, acute infectious disease of 0.17 (0.153–0.187) and the remainder asymptomatic.<sup>3,4</sup> Again, despite a higher number of cases among females, the YLD-per case among males was higher.

### Chlamydial infection

| Study-level covariate | Parameter  | Location level | beta                       | Exponentiated beta |
|-----------------------|------------|----------------|----------------------------|--------------------|
| Diagnosis other       | prevalence | Global         | -0.031 (-0.18 to -0.00029) | 0.97 (0.83 – 1.00) |

|                  |            |        |                            |                    |
|------------------|------------|--------|----------------------------|--------------------|
| Culture-positive | prevalence | Global | -0.024 (-0.12 to -0.00058) | 0.98 (0.89 – 1.00) |
|------------------|------------|--------|----------------------------|--------------------|

| Country-level covariate                         | Parameter  | beta                        | Exponentiated beta |
|-------------------------------------------------|------------|-----------------------------|--------------------|
| Antenatal Care (4 visits) Coverage (proportion) | prevalence | -0.024 (-0.093 to -0.00013) | 0.98 (0.91 – 1.00) |

### Trichomoniasis

Trichomoniasis estimation methods were similar to those used for gonococcal and chlamydia infection. However, the female-to-male sex ratio was unbounded, and excess mortality rate was assumed to be zero. Remission was bounded from 0.7199 and 0.89. Surveillance and case-notification data for trichomonas was considered to be unreliable and not used. The reference definition for diagnostic was PCR, and wet mount and culture positive were crosswalked against the reference definition.

Males are assumed to be 100% asymptomatic with trichomoniasis, while 0.34 (0.306–0.374) of prevalent females were assigned a health state of mild, acute infectious disease.<sup>3,4</sup>

### Trichomonas infection

| Study-level covariate | Parameter  | Location level | beta                   | Exponentiated beta |
|-----------------------|------------|----------------|------------------------|--------------------|
| Diagnostic wet mount  | prevalence | Global         | -0.41 (-0.5 to -0.24)  | 0.66 (0.61 – 0.79) |
| Culture-positive      | prevalence | Global         | -0.15 (-0.38 to -0.01) | 0.86 (0.68 – 0.99) |

| Country-level covariate                         | Parameter  | beta                      | Exponentiated beta |
|-------------------------------------------------|------------|---------------------------|--------------------|
| Antenatal care (4 visits) coverage (proportion) | prevalence | -0.052 (-0.098 to -0.003) | 0.95 (0.91 – 1.00) |

### Genital herpes due to HSV-2

Genital herpes estimation assumed remission and mortality are both zero. Incidence estimates were thus based on mathematical integration of age-specific prevalence data. Incidence was restricted to occur between ages 10 and 59. After careful analysis, the modeling strategy for genital herpes has evolved to exclude high-risk populations. High-risk groups that were excluded included MSM, HIV-positive, prisoners, sex workers, drug users, and STI clinic samples. However, blood donor samples were included, and crosswalked to the general population assuming the prevalence is lower than that of the general population. Data on pregnant populations were also crosswalked, without a priori knowledge of direction. Crosswalks were performed at the regional level to allow for variation in the quantitative relationship. A single country covariate, age-standardized HIV prevalence, was used to guide estimates in locations with sparse data in recognition of the strong relationship between HSV-2 and HIV transmission.

Many with initial genital herpes infection have a painful rash that, while not as severe as that accompanying zoster reactivation, is more severe than that associated with recurrent genital herpes episodes. A systematic literature review revealed a few studies that informed our estimation that 0.175 (0.10–0.25) of initial herpes cases have symptoms of moderate, acute infectious disease lasting 3 (2–4) weeks and 0.189 have prevalent persons have 6 (5–7) recurrent episodes per year each lasting 2 (1–3) weeks.<sup>5–7</sup>

### Genital herpes

| Study-level covariate         | Parameter  | Location level | beta                       | Exponentiated beta |
|-------------------------------|------------|----------------|----------------------------|--------------------|
| Study Population Blood Donors | Prevalence | Region         | -0.38<br>(-0.62 to -0.16)  | 0.68 (0.54 – 0.86) |
| Study Population Pregnant     | Prevalence | Region         | -0.11<br>(-0.25 to -0.034) | 0.90 (0.78 – 1.03) |

| Country-level covariate         | Parameter  | beta                      | Exponentiated beta |
|---------------------------------|------------|---------------------------|--------------------|
| HIV age-standardized prevalence | Prevalence | 0.057<br>(0.0038 – 0.098) | 1.06 (1.00 – 1.10) |

### Early syphilis

For early syphilis estimation methods, data were assumed to be prevalence measures. Age range was restricted to be from 10 to 64 years. Excess mortality was assumed to be 0, and incidence rates were assumed to be less than 0.3. Remission bounds were between 0.5 and 2. Blood donor samples consistently had prevalence values that were lower than that of the general population, and were crosswalked accordingly. Data from studies using only treponemal tests, or only non-treponemal tests, were additionally crosswalked to the reference definition of both treponemal and non-treponemal testing. Crosswalks were performed in a country-specific manner to reflect the variability in false positive rate in non-treponemal tests as a function of age, sex, and endemicity of other non-STI infectious conditions. The proportion of antenatal care coverage was applied as a country covariate on prevalence.

Our review of literature on proportion of early syphilis cases with symptoms led to assignment of a 0.686 (0.627–0.745) of prevalent cases to have a combined duration of primary and secondary symptoms lasting 23 (13–44) days.<sup>8–11</sup> The remainder were considered asymptomatic.

### Early syphilis infection

| Study-level covariate         | Parameter  | Location level | beta                      | Exponentiated beta |
|-------------------------------|------------|----------------|---------------------------|--------------------|
| Study Population Blood Donors | prevalence | Country        | -0.2 (-0.2 to -0.19)      | 0.82 (0.82 – 0.82) |
| Non-trep only                 | prevalence | Country        | 0.0021 (0.00008 – 0.0094) | 1.00 (1.00 – 1.01) |

| Country-level covariate | Parameter | beta | Exponentiated beta |
|-------------------------|-----------|------|--------------------|
|-------------------------|-----------|------|--------------------|

|                                                    |            |                      |                     |
|----------------------------------------------------|------------|----------------------|---------------------|
| Antenatal Care (4 visits)<br>Coverage (proportion) | prevalence | -0.2 ( -0.2 to -0.2) | 0.82 (0.82 to 0.82) |
|----------------------------------------------------|------------|----------------------|---------------------|

### **Adult tertiary syphilis**

Prevalence data were the primary input. Incidence was assumed to not occur until age 15. Excess mortality rate was capped at 0.1, which equates to minimum duration of five years, and no remission was assumed. Cause-specific mortality rate (CSMR) results from GBD 2016 mortality and causes of death analysis were included in the model, which was also used to back-calculate excess mortality rate (EMR) data to match each input prevalence datum.<sup>12</sup> CSMR priors were not passed on through the cascade so as to restrict the utility of these data to back-calculating prevalence at the country level. Study-level covariates were used to crosswalk surveillance data to the reference source of hospital data. Natural log of lag-distributed income (LN-LDI) was used as a country-level covariate on EMR. Non transformed syphilis prevalence was used as used as a country-level covariate on prevalence. An increasing slope prior was applied to incidence from ages 30 to 100.

Two notable differences exist between GBD 2016 and previous estimates of adult tertiary syphilis. First, in GBD 2015 all cases of adult tertiary syphilis were assumed to be symptomatic and were assigned the same disability that describes a health state of moderate motor and cognitive dysfunction. For GBD 2016, there were 8 new sequelae, including asymptomatic adult tertiary syphilis. Second, the reference source was hospital data, which was adjusted for the likelihood of tertiary syphilis to appear as an inpatient or outpatient case.

### **Adult tertiary syphilis**

| Study-level covariate          | Parameter  | Location level | beta                  | Exponentiated beta |
|--------------------------------|------------|----------------|-----------------------|--------------------|
| Surveillance/notification data | prevalence | Global         | -1.1 (-1.23 to -0.98) | 0.33 (0.29 – 0.38) |

| Country-level covariate          | Parameter             | beta                  | Exponentiated beta |
|----------------------------------|-----------------------|-----------------------|--------------------|
| LDI (I\$ per capita)             | excess mortality rate | -0.24 (-0.29 to -0.2) | 0.79 (0.75 – 0.82) |
| Syphilis prevalence (proportion) | Prevalence            | 0.098 (0.0021 – 0.41) | 1.10 (1.00 – 1.51) |

### **Other sexually transmitted infections**

To calculate YLDs due to acute infection with other STI, we calculated the YLD to YLL ratio for all STI (excluding other STI) and then applied that same ratio to other STI YLLs. YLDs were also estimated to other STI as a result of the proportion of PID and PID-induced infertility that was not due to gonorrhoea or chlamydia.

### **Uncertainty and model selection**

For all STI estimates, uncertainty bounds include uncertainty due to input data, including CSMR from GBD 2016 mortality and causes of death analysis, crosswalks from non-reference definitions, uncertainty in numerical solutions (posteriors) of each DisMod-MR 2.1 model, and proportion of all infections with each type of symptom.

In consultation with GBD researchers and collaborators, final models were selected on a combination of qualitative and quantitative goodness of fit to input data, plausibility of geographic and temporal trends, consistency of age pattern, and, when available, comparison with other published studies on STI epidemiology. Directionality, magnitude, and plausibility of study-level and country-level covariates was also considered in the process of model development. Of note, due to the nature of statistical modelling, final results do not always cover the values reported in input data.

No other changes were made to the modelling strategy for GBD 2016.

# Acute hepatitis A

## Flowchart

### Acute hepatitis A

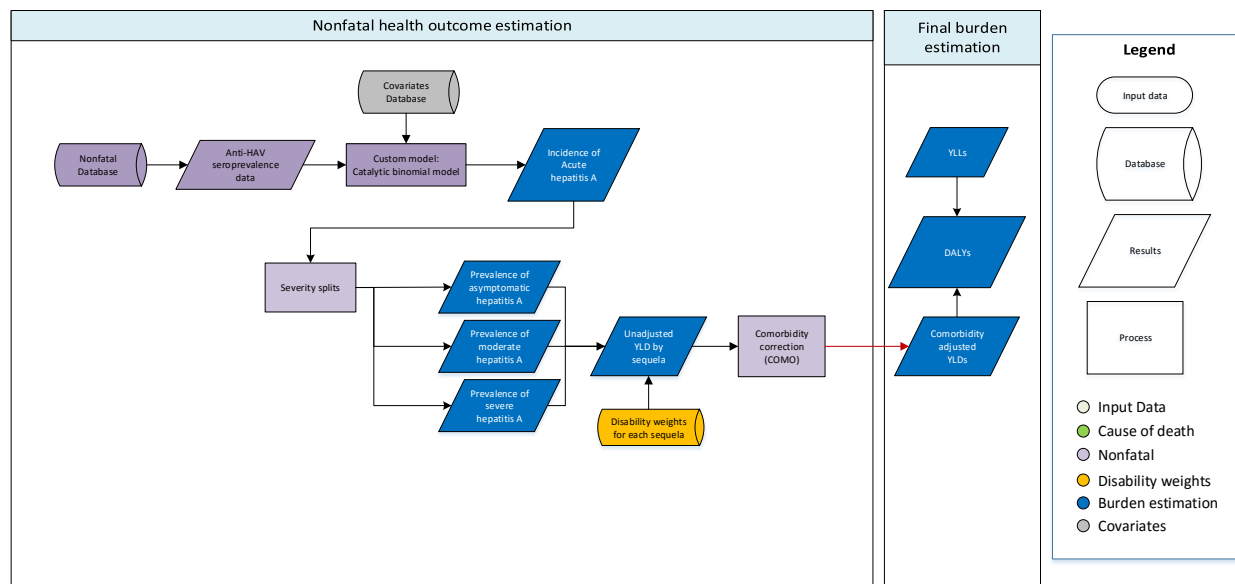

## Case definition

We define acute hepatitis A as an infection with the hepatitis A virus resulting in anti-HAV IgG seroconversion, regardless of symptoms. It includes all ICD-10 codes under the heading B15 (Acute hepatitis A).

## Input data

### Model inputs

We use anti-HAV seroprevalence data from population-based studies and surveys for the incidence model.

| Level       | Prevalence |
|-------------|------------|
| Data points | 3668       |
| Studies     | 469        |
| Locations   | 175        |
| Regions     | 21         |

Updates to systematic reviews are performed on an ongoing schedule across all GBD causes, an update for hepatitis A will be performed in the next 1-2 iterations.

### Severity splits & disability weights

Based on information published by Armstrong et al, (Armstrong GL, Bell BP. Hepatitis A Virus Infections in the United States: Model-Based Estimates and Implications for Childhood Immunization. *Pediatrics*. 2002 May 1;109(5):839–45.) we assume that the probability of symptomatic infection increases with age from ~1% in the first year of life to ~85% in adulthood.

The table below illustrates the sequelae associated with Acute Hep A, as well as the lay descriptions and associated disability weights.

| Sequela      | Description                                                                                          | Disability Weight      |
|--------------|------------------------------------------------------------------------------------------------------|------------------------|
| Moderate     | Has a fever and aches, and feels weak, which causes some difficulty with daily activities.           | 0.051<br>(0.032-0.074) |
| Severe       | Has a high fever and pain, and feels very weak, which causes great difficulty with daily activities. | 0.133<br>(0.088-0.19)  |
| Asymptomatic | Infection with no apparent illness of                                                                | NA                     |

### Modelling strategy

Given its reasonably stable force of infection among susceptible people across age groups, we used a catalytic binomial model to estimate incidence of acute hepatitis A based on anti-HAV seroprevalence. The catalytic binomial model is a binomial generalized linear model with a complementary log-log link, and an offset term for log-age. Since anti-HAV is a lifetime marker of past infection, and a given individual can only be infected once, seroprevalence at age  $t$  is equal to the cumulative incidence (CI) over  $t$  years. Assuming constant force of infection, we can estimate the incidence rate (IR) as,

$$CI = 1 - e^{-IR \cdot t}$$

We can rearrange this equation to solve for the log-IR:

$$\ln(IR) = \frac{\ln(-\ln(1 - CI))}{\ln(t)}$$

Thus, by using the complimentary log-log link for CI (i.e.  $\ln(-\ln(1-CI))$ ) with an offset for log-age, we are able to model the incidence rate of infection from seroprevalence data. To inform the model in the absence of data we use a predictive covariate derived from principal components analysis of lag-distributed income (LDI) and the proportion of the population with access to improved water. We use a mixed effects model with fixed effects on the aforementioned PCA-derived covariate, and nested hierarchical random effects on super-region, region, country, and sub-national locations.

### Changes from GBD 2015 to GBD 2016

Our overall approach has not changed from that used in GBD 2016

# Acute hepatitis B

## Flowchart

### Acute hepatitis B

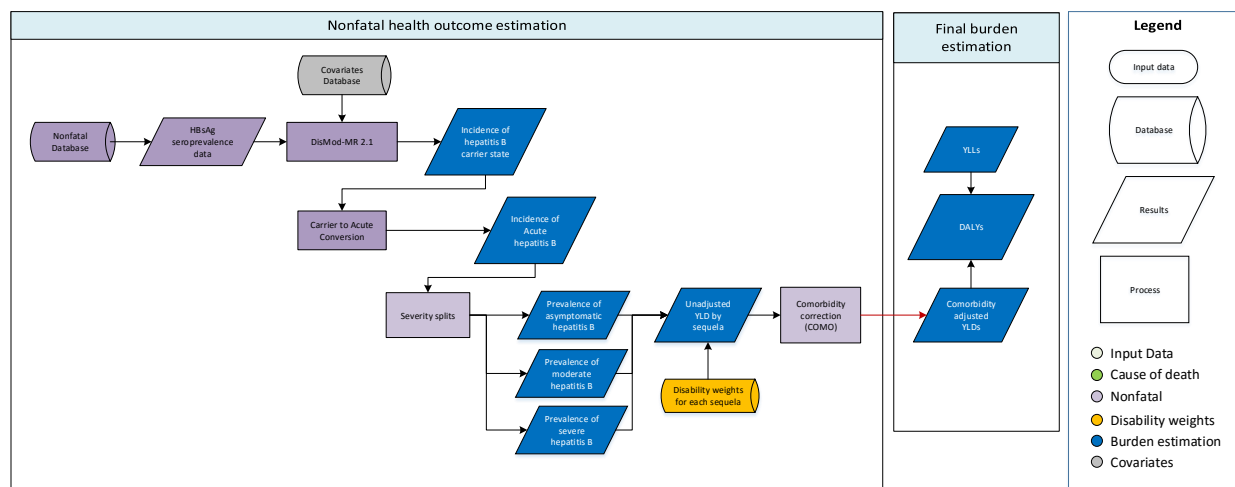

## Case definition

We define acute hepatitis B as the period corresponding to initial infection with the hepatitis B virus, regardless of symptoms. It includes all ICD-10 codes under the heading B16 (Acute hepatitis B).

## Input data

### Model inputs

We use hepatitis B surface antigen (HBsAg) seroprevalence data from population-based studies and surveys for the incidence model.

| Level       | Prevalence |
|-------------|------------|
| Data points | 2987       |
| Studies     | 312        |
| Locations   | 145        |
| Regions     | 19         |

Updates to systematic reviews are performed on an ongoing schedule across all GBD causes, an update for hepatitis A will be performed in the next 1-2 iterations.



## Modelling strategy

We model the incidence of chronic HBsAg carriage using a full DisMod model of HBsAg seroprevalence. We then convert incidence of chronic carriage to total incidence of hepatitis B infection by dividing age-specific estimates of the incidence of chronic carriage by age-specific estimates of the probability of infection resulting in carriage based on Edmunds et al (Edmunds WJ, Medley GF, Nokes DJ, Hall AJ, Whittle HC. The influence of age on the development of the hepatitis B carrier state. Proc Biol Sci. 1993 Aug 23;253(1337):197–201):

$$P(\text{carrier} \mid \text{age} \leq 6 \text{ months}) = 0.885$$

$$P(\text{carrier} \mid 6 \text{ months} \leq \text{age} < 25 \text{ years}) = e^{-0.645 \times \text{age}^{0.455}}$$

$$P(\text{carrier} \mid \text{age} \geq 25 \text{ years}) = e^{-0.645 \times 25^{0.455}} = 0.061$$

We then split symptomatic cases into moderate (73%) and severe (27%) severities based on data from McMahon et al (McMahon BJ, Alward WL, Hall DB, Heyward WL, Bender TR, Francis DP, et al. Acute hepatitis B virus infection: relation of age to the clinical expression of disease and subsequent development of the carrier state. J Infect Dis. 1985 Apr;151(4):599–603).

| Sequela      | Description                                                                                          | Disability Weight      |
|--------------|------------------------------------------------------------------------------------------------------|------------------------|
| Moderate     | Has a fever and aches, and feels weak, which causes some difficulty with daily activities.           | 0.051<br>(0.032-0.074) |
| Severe       | Has a high fever and pain, and feels very weak, which causes great difficulty with daily activities. | 0.133<br>(0.088-0.19)  |
| Asymptomatic | Infection with no apparent illness of                                                                | NA                     |

## Changes from GBD 2015 to GBD 2016

We have updated the severity splits, but the modeling strategy remains otherwise unchanged from GBD 2013.

# Acute hepatitis C

## Flowchart

### Acute hepatitis C

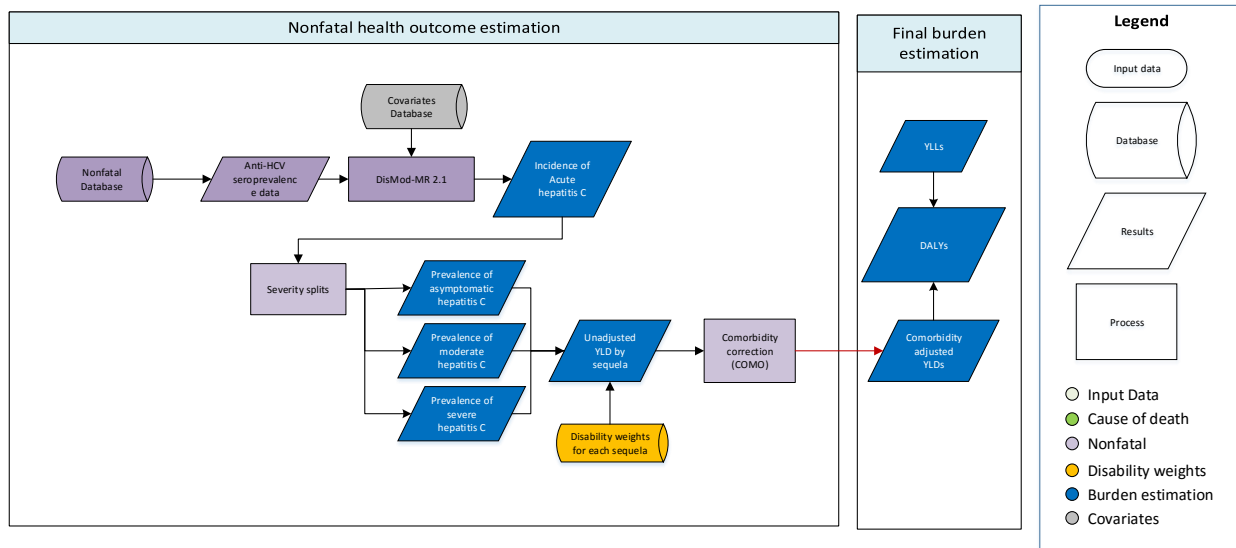

## Case definition

We define acute hepatitis C as the period corresponding to initial infection with the hepatitis C virus, resulting in anti-HCV IgG seroconversion, regardless of symptoms. It includes all ICD-10 codes under the heading B17.1 (Acute hepatitis C).

## Input data

### Model inputs

To estimate morbidity for HepC, we use anti-HCV seroprevalence data from population-based studies and surveys to estimate incidence and prevalence of hepatitis C infection:

| Level       | Prevalence |
|-------------|------------|
| Data points | 5242       |
| Studies     | 239        |
| Locations   | 521        |
| Regions     | 21         |

## Model

We model the incidence and prevalence of hepatitis C infection using a full DisMod model of anti-HCV seroprevalence data. We divide incident infections into asymptomatic (75%), moderate (24%), and severe (1%) states. Based on a meta-analysis, we estimate that 75% of anti-HCV positive people are chronically infected.

| <b>Sequela</b> | <b>Description</b>                                                                                   | <b>Disability Weight</b> |
|----------------|------------------------------------------------------------------------------------------------------|--------------------------|
| Moderate       | Has a fever and aches, and feels weak, which causes some difficulty with daily activities.           | 0.051<br>(0.032-0.074)   |
| Severe         | Has a high fever and pain, and feels very weak, which causes great difficulty with daily activities. | 0.133<br>(0.088-0.19)    |
| Asymptomatic   | Infection with no apparent illness of                                                                | NA                       |

## Changes from GBD 2015 to GBD 2016

We have made no substantive changes in the modeling strategy from GBD 2015.

# Acute hepatitis E

## Flowchart

### Acute hepatitis E

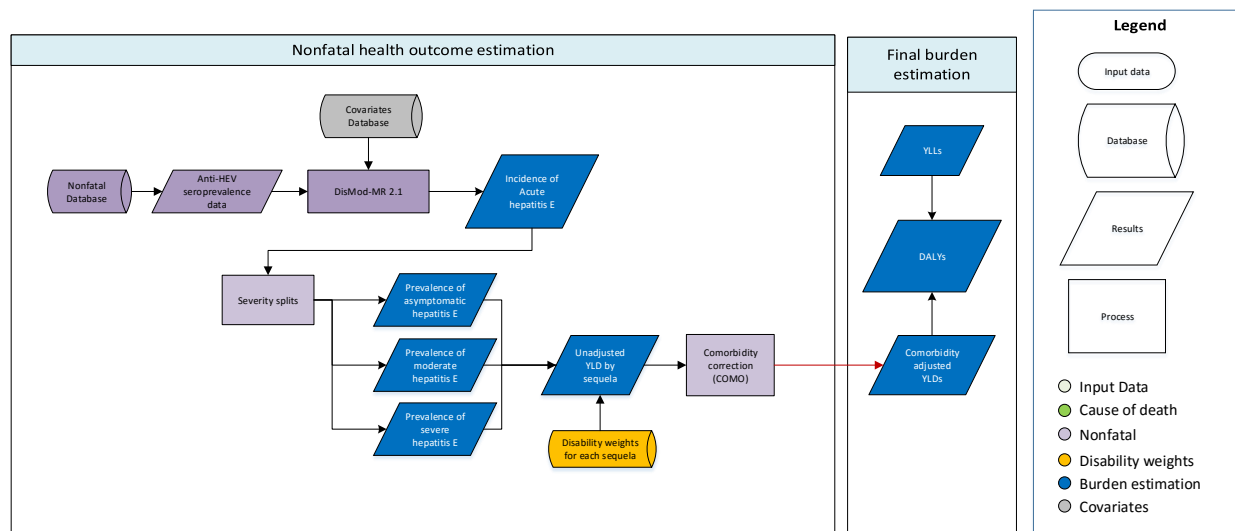

## Case definition

For GBD 2016, we define acute hepatitis E as an infection with the hepatitis E virus resulting in anti-HEV IgG seroconversion, regardless of symptoms. It includes all ICD-10 codes under the heading B17.2 (Acute hepatitis E).

## Input data

### Model inputs

For GBD 2016 estimation, we used anti-HEV seroprevalence data from population-based studies and surveys to estimate incidence of infection. The table below indicates the number of data points included in terms of prevalence by location hierarchy:

| Level       | Prevalence |
|-------------|------------|
| Data points | 433        |
| Studies     | 85         |
| Locations   | 56         |
| Regions     | 19         |

## Modeling Strategy

The GBD 2016 estimation process for HepE uses a DisMod MR 2.1 model, which is a Bayesian meta-regression. We model the incidence of Hepatitis E using a full DisMod MR 2.1 model of anti-HEV seroprevalence, assuming no remission. Based on information published by Rein et al<sup>1</sup> we assume that the probability of symptomatic infection increases with age from ~1% in the first year of life to ~60% in adulthood.

The table below illustrates the sequelae associated with Acute HepE, along with their descriptions and disability weights.

| Sequela      | Description                                                                                          | Disability Weight      |
|--------------|------------------------------------------------------------------------------------------------------|------------------------|
| Moderate     | Has a fever and aches, and feels weak, which causes some difficulty with daily activities.           | 0.051<br>(0.032-0.074) |
| Severe       | Has a high fever and pain, and feels very weak, which causes great difficulty with daily activities. | 0.133<br>(0.088-0.19)  |
| Asymptomatic | Infection with no apparent illness of                                                                | NA                     |

## Changes from GBD 2015 to GBD 2016

We have made no substantive changes in the modeling strategy from GBD 2015.

## REFERENCES

1. Rein DB, Stevens GA, Theaker J, Wittenborn JS, Wiersma ST. The global burden of hepatitis E virus genotypes 1 and 2 in 2005. *Hepatology*. 2012 Apr 1;55(4):988–97.

## Cancer

All cancers except for non-melanoma skin cancer (basal cell carcinoma and squamous cell carcinoma)

### Input data and methodological appendix

#### Case definition

For GBD 2016, incidence, prevalence, and disability are estimated for all cancers as defined in ICD-10 (C00-C96). Prevalence for all cancers is estimated for a maximum of 10 years after incidence as in GBD 2013 and GBD 2015. Prevalence extending beyond the 10 year period is only estimated for permanent sequelae from procedures.

To estimate disability for each cancer, total prevalence is split into four sequelae: 1. diagnosis and primary therapy; 2. controlled phase; 3. metastatic phase; and 4. terminal phase. Diagnosis and primary therapy are defined as the time from symptoms onset to end of treatment. Controlled phase is defined as the time after finishing primary treatment and either cure (defined as survival after 10 years) or metastatic phase. Metastatic phase is defined as the time period of intensive treatment for metastatic disease, terminal phase is defined as the one month period prior to death. Each of these sequelae has a separate disability weight (**Error! Reference source not found.**). Additional disability is estimated for breast cancer (disability due to mastectomy), larynx cancer (disability due to laryngectomy), colon and rectum cancer (disability due to stoma), bladder cancer (disability due to incontinence), and prostatectomy (disability due to incontinence and impotence). The associated ICD codes for neoplasms estimated for GBD 2016 are listed below, as well as in Appendix Table 4.

Table 1. GBD cancer causes with respective ICD codes

| GBD cause                                         | ICD9                                                                                                                                                              | ICD10                                                                                                                                                                |
|---------------------------------------------------|-------------------------------------------------------------------------------------------------------------------------------------------------------------------|----------------------------------------------------------------------------------------------------------------------------------------------------------------------|
| Bladder cancer                                    | 188.0-188.9                                                                                                                                                       | C67-C67.9                                                                                                                                                            |
| Brain and nervous system cancer                   | 191.0-192.9                                                                                                                                                       | C70-C72.9                                                                                                                                                            |
| Breast cancer                                     | 174.0-175.9                                                                                                                                                       | C50-C50.929                                                                                                                                                          |
| Cervical cancer                                   | 180.0-180.9                                                                                                                                                       | C53-C53.9, D26.0                                                                                                                                                     |
| Colon and rectum cancer                           | 153.0-154.9, 209.1-209.17                                                                                                                                         | C18-C21.9                                                                                                                                                            |
| Esophageal cancer                                 | 150.0-150.9                                                                                                                                                       | C15-C15.9                                                                                                                                                            |
| Gallbladder and biliary tract cancer              | 156.0-156.9, 209.25-209.27                                                                                                                                        | C23-C24.9                                                                                                                                                            |
| Hodgkin disease                                   | 201.0-201.98                                                                                                                                                      | C81-C81.99                                                                                                                                                           |
| Kidney cancer                                     | 189.0-189.1, 209.24                                                                                                                                               | C64-C65.9                                                                                                                                                            |
| Larynx cancer                                     | 161.0-161.9                                                                                                                                                       | C32-C32.9                                                                                                                                                            |
| Leukemia                                          | 208.0-208.92                                                                                                                                                      | C94.1, C94.7-C95.92                                                                                                                                                  |
| Acute lymphoid leukemia ALL                       | 204.0-204.02                                                                                                                                                      | C91.0-C91.02                                                                                                                                                         |
| Acute myeloid leukemia AML                        | 205.0-205.02, 205.3-205.32, 206.0-206.02, 207.0                                                                                                                   | C92.0-C92.02, C92.3-C92.62, C93.0-C93.02, C94.0-C94.02, C94.2-C94.22, C94.4-C94.5                                                                                    |
| Chronic lymphoid leukemia CLL                     | 204.1-204.12                                                                                                                                                      | C91.1-C91.12                                                                                                                                                         |
| Chronic myeloid leukemia CML                      | 205.1-205.12, 206.1-206.12, 207.1                                                                                                                                 | C92.1-C92.12                                                                                                                                                         |
| Other leukemia                                    | 204, 204.2, 204.5, 204.8, 204.9, 205, 205.2, 205.8, 205.9, 206, 206.2, 206.8, 206.9, 207, 207.0-207.2, 207.8, 207.9, 208, 208.0-208.2, 208.4, 208.7, 208.8, 208.9 | C91, C91.2, C91.3-C91.9, C92, C92.2, C92.7-C92.9, C93, C93.1-C93.3, C93.5, C93.7-C93.9, C94, C94.1, C94.3, C94.6-C94.8, C95, C95.1-C95.2, C95.4, C95.6, C95.7, C95.9 |
| Liver cancer                                      | 155.0-155.9                                                                                                                                                       | C22-C22.9                                                                                                                                                            |
| Lung, bronchus, and trachea cancer                | 162.0-162.9, 209.21                                                                                                                                               | C33-C34.92                                                                                                                                                           |
| Non-Hodgkin lymphoma                              | 200.0-200.9, 202.0-202.98                                                                                                                                         | C82-C86.6, C96-C96.9                                                                                                                                                 |
| Malignant skin melanoma                           | 172.0-172.9                                                                                                                                                       | C43-C43.9                                                                                                                                                            |
| Mesothelioma                                      | 158.9, 163.0-163.9                                                                                                                                                | C45-C45.9                                                                                                                                                            |
| Oral and Lip Cancer                               | 140.0-145.9                                                                                                                                                       | C0-C08.9                                                                                                                                                             |
| Multiple myeloma and immunoproliferative diseases | 203.0-203.9                                                                                                                                                       | C88-C90.9                                                                                                                                                            |
| Nasopharynx cancer                                | 147.0-147.9                                                                                                                                                       | C11-C11.9                                                                                                                                                            |
| Non-melanoma skin cancer (Basal cell carcinoma)   | 173.0-173.01, 173.09-173.11, 173.19-173.21, 173.29-173.31,                                                                                                        | C44.0-C44.01, C44.09-C44.119, C44.19-C44.219, C44.29-C44.319,                                                                                                        |

|                                                    |                                                                                                                                                                                                                                                                                                                                                                                                                                |                                                                                                                                                                                                                                                                                                                                                                                                                                                                                           |
|----------------------------------------------------|--------------------------------------------------------------------------------------------------------------------------------------------------------------------------------------------------------------------------------------------------------------------------------------------------------------------------------------------------------------------------------------------------------------------------------|-------------------------------------------------------------------------------------------------------------------------------------------------------------------------------------------------------------------------------------------------------------------------------------------------------------------------------------------------------------------------------------------------------------------------------------------------------------------------------------------|
|                                                    | 173.39-173.41,<br>173.49-173.51,<br>173.59-173.61,<br>173.69-173.71,<br>173.79-173.81,<br>173.89-173.91,<br>173.99, 216.0-216.9,<br>232.0-232.9, 238.2                                                                                                                                                                                                                                                                         | C44.39-C44.41,<br>C44.49-C44.519,<br>C44.59-C44.619,<br>C44.69-C44.719,<br>C44.79-C44.80,<br>C44.82-C44.91,<br>C44.99                                                                                                                                                                                                                                                                                                                                                                     |
| Non-melanoma skin cancer (Squamous-cell carcinoma) | 173.02, 173.12,<br>173.22, 173.32,<br>173.42, 173.52,<br>173.62, 173.72,<br>173.82, 173.92                                                                                                                                                                                                                                                                                                                                     | C44.02, C44.12-<br>C44.129, C44.22-<br>C44.229, C44.32-<br>C44.329, C44.42,<br>C44.52-C44.529,<br>C44.62-C44.629,<br>C44.72-C44.729,<br>C44.81, C44.92, D04-<br>D04.9, D49.2                                                                                                                                                                                                                                                                                                              |
| Other neoplasms                                    | 158.0-158.8, 209.4-<br>209.57, 209.61,<br>209.63-209.67,<br>210.0-211.8, 212.0-<br>212.8, 213.0-215.9,<br>217.0-221.8, 222.0-<br>222.8, 223.0-223.89,<br>224.0-229.0, 229.8,<br>230.1-230.8, 231.0-<br>231.2, 233.0-233.2,<br>233.31-233.32,<br>233.4-233.5, 233.7,<br>234.0-234.8, 235.0,<br>235.4, 235.6-235.8,<br>236.1-236.2, 236.4-<br>236.5, 236.7,<br>236.91-237.3, 237.5-<br>238.1, 238.3-238.5,<br>239.2-239.4, 239.6 | D00.00-D00.2, D01.0-<br>D01.3, D02.0-D02.3,<br>D03-D03.9, D05-<br>D06.9, D07.0-D07.2,<br>D07.4-D07.5, D09.0,<br>D09.2-D09.3, D09.8,<br>D10.0-D10.7, D11-<br>D12.9, D13.0-D13.7,<br>D14.0-D14.32, D15-<br>D24.9, D27-D27.9,<br>D28.0-D28.7, D29.0-<br>D29.8, D30.0-D30.8,<br>D31-D36.7, D37.01-<br>D37.5, D38.0-D38.5,<br>D39.1-D39.2, D39.8,<br>D40.0-D40.8, D41.0-<br>D41.8, D42-D43.9,<br>D44.0-D44.8, D45-<br>D45.9, D47-D47.0,<br>D47.2-D47.9, D48.0-<br>D48.7, D49.3-D49.4,<br>D49.6 |
| Other cancers                                      | 152.0-152.9, 160.0-<br>160.9, 164.0-164.9,<br>170.0-171.9, 181.0-<br>181.9, 182.9, 183.2-<br>183.8, 184.0-184.4,<br>184.8, 187.1-187.8,<br>189.2-189.8, 190.0-<br>190.9, 194.0-194.8,<br>209.0-209.03,                                                                                                                                                                                                                         | C17-C17.9, C3-C31.9,<br>C37-C38.8, C4-C41.9,<br>C47-C5, C51-C52.9,<br>C57-C57.8, C58-<br>C58.0, C60-C60.9,<br>C63-C63.8, C66-<br>C66.9, C68.0-C68.8,<br>C69-C7, C74-C75.8,<br>D49.81                                                                                                                                                                                                                                                                                                      |



|                      |                                                                                                                                                                                                                                                                                                                                                                                                                                                                     |                                                                                                                                                                                                                                                                                                                                                                                                                                                             |
|----------------------|---------------------------------------------------------------------------------------------------------------------------------------------------------------------------------------------------------------------------------------------------------------------------------------------------------------------------------------------------------------------------------------------------------------------------------------------------------------------|-------------------------------------------------------------------------------------------------------------------------------------------------------------------------------------------------------------------------------------------------------------------------------------------------------------------------------------------------------------------------------------------------------------------------------------------------------------|
|                      | 209.22, 209.31-209.36                                                                                                                                                                                                                                                                                                                                                                                                                                               |                                                                                                                                                                                                                                                                                                                                                                                                                                                             |
| Other pharynx cancer | 146.0-146.9, 148.0-148.9                                                                                                                                                                                                                                                                                                                                                                                                                                            | C09-C10.9, C12-C13.9                                                                                                                                                                                                                                                                                                                                                                                                                                        |
| Ovarian cancer       | 183.0                                                                                                                                                                                                                                                                                                                                                                                                                                                               | C56-C56.9                                                                                                                                                                                                                                                                                                                                                                                                                                                   |
| Pancreatic cancer    | 157.0-157.9                                                                                                                                                                                                                                                                                                                                                                                                                                                         | C25-C25.9                                                                                                                                                                                                                                                                                                                                                                                                                                                   |
| Prostate cancer      | 185.0-185.9                                                                                                                                                                                                                                                                                                                                                                                                                                                         | C61-C61.9                                                                                                                                                                                                                                                                                                                                                                                                                                                   |
| Stomach cancer       | 151.0-151.9, 209.23                                                                                                                                                                                                                                                                                                                                                                                                                                                 | C16-C16.9                                                                                                                                                                                                                                                                                                                                                                                                                                                   |
| Testicular cancer    | 186.0-186.9                                                                                                                                                                                                                                                                                                                                                                                                                                                         | C62-C62.92                                                                                                                                                                                                                                                                                                                                                                                                                                                  |
| Thyroid cancer       | 193.0-193.9                                                                                                                                                                                                                                                                                                                                                                                                                                                         | C73-C73.9                                                                                                                                                                                                                                                                                                                                                                                                                                                   |
| Uterine cancer       | 182.0-182.8                                                                                                                                                                                                                                                                                                                                                                                                                                                         | C54-C54.9                                                                                                                                                                                                                                                                                                                                                                                                                                                   |
| Garbage code         | 149.0-149.9, 159.0-159.9, 165.0-165.9, 169.0, 173.0, 176.0-179.9, 183.9-184.0, 184.5, 184.9, 187.0, 187.9, 189.0, 189.9, 194.9-199.9, 209.0, 209.2, 209.29-209.3, 209.6, 209.62, 209.69-210.0, 211.0, 211.9-212.0, 212.9, 221.0, 221.9-222.0, 222.9-223.0, 223.9, 229.0-229.1, 229.9-230.0, 230.9-231.0, 231.8-231.9, 233.0, 233.3, 233.39, 233.6, 233.9-234.0, 234.9-235.3, 235.5, 235.9-236.0, 236.3, 236.6, 236.9, 237.4, 238.0, 238.6-239.1, 239.5, 239.7-239.9 | C14-C14.9, C26-C29, C35-C36, C39-C39.9, C42, C44, C46-C46.9, C55-C55.9, C57.9, C59-C6, C63.9, C68, C68.9, C75.9-C80.9, C87, C97-D00.0, D01, D01.4-D02, D02.4-D02.9, D07, D07.3-D07.39, D07.6-D09, D09.1-D09.19, D09.7, D09.9-D10, D10.9, D13, D13.9-D14, D14.4, D28, D28.9-D29, D29.9-D30, D30.9, D36.9-D37.0, D37.6-D38, D38.6-D39.0, D39.7, D39.9-D40, D40.9-D41, D41.9, D44, D44.9, D46-D46.9, D47.1, D48, D48.9-D49.1, D49.5, D49.7-D49.8, D49.89-D49.9 |

### Input data

Cancer incidence is directly estimated from cancer mortality using mortality to incidence ratios (MIR). Data sources for cancer mortality are described in detail elsewhere.<sup>1</sup> Data sources to scale countries between a hypothetical best- and a hypothetical worst case survival remained the same for the worst case survival as in GBD 2015 where we used a combination of the 1950 US Mortality Files with “Cancer Survival in Africa, Asia, the Caribbean and Central America” (SurvCan) data.<sup>2,3</sup> For mesothelioma, gallbladder cancer, and the leukemia subtypes SEER 1973 survival data for the lower boundary was used since these cancers are not included in the US Mortality Files from 1950. We updated the hypothetical

best case survival using 5-year survival data from the SEER Cancer Statistics Review (CSR), 1975-2013.<sup>4</sup> To estimate the proportion of cancer patients undergoing procedures we used SEER data from 1983 to 2008<sup>5</sup> and Mexico Hospital Data from 2001 to 2009<sup>7</sup>. Data sources used to adjust procedure sequelae will be listed below.

### Modeling strategy

Estimation of cancer mortality and MIR estimation has been described in the GBD 2016 Mortality and Causes of Death capstone paper. The final GBD cancer mortality estimates are being transformed to incidence estimate by using separately estimated MIR. To summarize the MIR estimation process, incidence and mortality data from cancer registries were matched by cancer, age, sex, year, and location to generate MI ratios. Compared to GBD 2015 we used more narrow inclusion criteria to select the input for the MIR model. Only sources were included that reported both, incidence and mortality. We dropped MIR if cases were less than 25. Compared to the outliering process for GBD 2015, which relied on the binary classification of “developed” versus “developing” countries, we used SDI quintiles for GBD 2016 for dropping unrealistic data in the input dataset. MI ratios from SDI quintiles 1-4 were dropped if they were below the median MI ratio of quintile 5. This was done under the assumption that these MI ratios reflect incomplete death ascertainment. To not artificially increase the predicted MI ratio, MI ratios from SDI quintiles 1-4 were dropped if they were above the third interquartile range (IQR) x 1.5 IQR. MI ratios above 2 were dropped. To avoid MIR predictions for all age groups and all years above 1, the MIR input data was divided by upper caps. Upper caps were generated using the 95<sup>th</sup> percentile of MIR in the cleaned input dataset for all cancers combined. To avoid too low MIR predictions especially in young age groups with little data, the MIR data input was divided by lower caps, which were the 5<sup>th</sup> percentile of the cleaned input dataset by cancer.

A fixed effect logistic regression was used to fit the model input using the Socio-demographic Index (SDI) as a covariate with age and sex as categorical variables. The model was run separately by cancer and results were rescaled using the lower and upper caps.

$$\text{logit}(MI\ ratio_{c,a,s,t}) = \alpha + \beta_1 SDI_{c,t} + \sum_a^A \beta_2 I_a + \beta_3 I_s + \epsilon_{c,a,s,t}$$

c: country, a: age group, t: time (years); s: sex

SDI: Socio-demographic index (index using log lag dependent income per capita (LDI), average educational attainment in the population over age 15, and total fertility rate (TFR))

I: indicator variable

$\epsilon_{c,a,s,t}$ : error term

Data points were outliered manually if they clearly influenced the model in an unrealistic way. For example, a data point was marked as an outlier if it created a single-year, single age group spike in model predictions. Results from the final linear model were used as input for space-time smoothing and a Gaussian Process Regression (ST-GPR). Compared to GBD 2013 and 2015 the MI ratio estimation continues to be revised since the modeling strategy used for GBD 2015 yielded MI ratios for low- and low-middle SDI that were very close to MI ratios from high-SDI countries for certain cancers.

Final MI ratio estimates at the 1000 draw level were combined with final mortality estimates (as well at the 1000 draw level) to generate incidence estimates. It was assumed that uncertainty in the MI ratio is independent of uncertainty in the estimated mortality.

After transforming the final GBD cancer mortality estimates to incidence estimates (step 1 in the flowchart), incidence was combined with the relative yearly survival estimates up to 10 years (step 8 in the flowchart). To estimate cancer prevalence, relative cancer survival was estimated by scaling cancer specific survival between the “best case” and “worst case” survival, using the survival data sources listed above (step 2, 3, and 5 in the flowchart). To transform relative to absolute survival (adjusting for background mortality), GBD 2016 lifetables were used (step 6 and 7 in the flowchart) to calculate lambda values:  $\lambda = (\ln(nLx/nLx+1))/5$  where  $nLx$ =person years lived between ages  $x$  and  $x+n$  (from GBD lifetable). Absolute survival was then calculated using an exponential survival function (absolute survival = relative survival \*  $e^{\lambda t}$ ).

The access to cancer care variable to scale countries between the best and worst case survival was estimated using the same method as for GBD 2013 and GBD 2015 (step 4 in the flowchart)<sup>8</sup>:

$$\text{Access to care} = 1 - \frac{\text{Age standardized MIR}_{cys} - \text{Age standardized MIR}_{min}}{\text{Age standardized MIR}_{max} - \text{Age standardized MIR}_{min}}$$

$c$ =country;  $y$ =year;  $s$ =sex; Age-standardized MI ratio<sub>min</sub>=lowest MIR for all countries and years; Age standardized MIR<sub>max</sub>=highest MIR for all countries and years

Survivors beyond 10 years were considered cured. The survivor population prevalence was divided into two sequelae (1. diagnosis and primary therapy; 2. controlled phase). The yearly prevalence of the population that did not survive beyond 10 years was then divided into the four sequelae by assigning the fixed durations for the diagnosis and primary therapy phase, metastatic phase, and terminal phase and assigning the remaining prevalence to the controlled phase (step 9 in the flowchart). Duration of the treatment sequelae (1. diagnosis and primary therapy; 2. controlled phases; 3. metastatic phase; 4. terminal phase) remained the same as for GBD 2013 and GBD 2015.<sup>8</sup> Table 3 lists the duration including sources used.

|                   | Diagnosis/Treatment (months) | Remission                                                               | Disseminated/metastatic (months) | Note                                                           | Terminal (months) |
|-------------------|------------------------------|-------------------------------------------------------------------------|----------------------------------|----------------------------------------------------------------|-------------------|
| Esophageal cancer | 5 <sup>9</sup>               | Calculated based on remainder of time after attributing other sequelae. | 4.6 <sup>10</sup>                | SEER Summary Stage 1997 (Distant site/node involved) 1995-2000 | 1 months          |
| Stomach cancer    | 5.2 <sup>9</sup>             |                                                                         | 3.88 <sup>10</sup>               | SEER Summary Stage 1997 (Distant site/node involved) 1995-2000 |                   |
| Liver cancer      | 4                            |                                                                         | 2.51 <sup>10</sup>               | SEER Summary Stage 1997 (Distant site/node involved) 1995-2000 |                   |
| Larynx cancer     | 5.3 <sup>9</sup>             |                                                                         | 8.84 <sup>10</sup>               | SEER Stage IVc                                                 |                   |

|                                 |                   |
|---------------------------------|-------------------|
| Lung cancer                     | 3.3 <sup>11</sup> |
| Breast cancer                   | 3 <sup>11</sup>   |
| Cervical cancer                 | 4.8 <sup>9</sup>  |
| Uterine cancer                  | 4.6 <sup>9</sup>  |
| Prostate cancer                 | 4 <sup>11</sup>   |
| Colorectal cancer               | 4 <sup>11</sup>   |
| Oral cancer                     | 5.3 <sup>9</sup>  |
| Nasopharyngeal cancer           | 5.3 <sup>9</sup>  |
| Cancer of other part of pharynx | 5.3 <sup>9</sup>  |
| Gallbladder cancer              | 4                 |
| Pancreas cancer                 | 4.1 <sup>9</sup>  |
| Melanoma                        | 2.9 <sup>12</sup> |
| Ovarian cancer                  | 3.2 <sup>11</sup> |
| Testicular cancer               | 3.7 <sup>9</sup>  |
| Kidney cancer                   | 5.3 <sup>9</sup>  |
| Bladder cancer                  | 5.1 <sup>9</sup>  |
| Brain cancer                    | 5                 |

|                     |                                                                |
|---------------------|----------------------------------------------------------------|
| 4.51 <sup>10</sup>  | SEER Summary Stage 1997 (Distant site/node involved) 1995-2000 |
| 17.7 <sup>10</sup>  | SEER Summary Stage 1997 (Distant site/node involved) 1995-2000 |
| 9.21 <sup>10</sup>  | SEER Summary Stage 1997 (Distant site/node involved) 1995-2000 |
| 11.6 <sup>10</sup>  | SEER Summary Stage 1997 (Distant site/node involved) 1995-2000 |
| 30.35 <sup>10</sup> | SEER Summary Stage 1997 (Distant site/node involved) 1995-2000 |
| 9.69 <sup>10</sup>  | SEER Summary Stage 1997 (Distant site/node involved) 1995-2000 |
| 9.33 <sup>10</sup>  | SEER Stage IVc                                                 |
| 13.19 <sup>10</sup> | SEER Stage IVc                                                 |
| 7.91 <sup>10</sup>  | SEER Stage IVc                                                 |
| 3.47 <sup>10</sup>  | SEER Summary Stage 1997 (Distant site/node involved) 1995-2000 |
| 2.54 <sup>10</sup>  | SEER Summary Stage 1997 (Distant site/node involved) 1995-2000 |
| 7.18 <sup>10</sup>  | SEER Summary Stage 1997 (Distant site/node involved) 1995-2000 |
| 25.6 <sup>10</sup>  | SEER Summary Stage 1997 (Distant site/node involved) 1995-2000 |
| 19.47 <sup>10</sup> | SEER Stage III                                                 |
| 5.38 <sup>10</sup>  | SEER Summary Stage 1997 (Distant site/node involved) 1995-2000 |
| 5.8 <sup>10</sup>   | SEER Summary Stage 1997 (Distant site/node involved) 1995-2000 |
| 6.93 <sup>10</sup>  | SEER Median age standardized survival all patients, all years  |

|                       |                                      |                     |                                                                                                                                          |
|-----------------------|--------------------------------------|---------------------|------------------------------------------------------------------------------------------------------------------------------------------|
| Thyroid cancer        | 3                                    | 19.39 <sup>10</sup> | SEER Stage IVc                                                                                                                           |
| Mesothelioma          | 4                                    | 7.75 <sup>10</sup>  | SEER Summary Stage 1997<br>(Distant site/node involved)<br>1995-2000                                                                     |
| Hodgkin lymphoma      | 3.7 <sup>11</sup>                    | 26 <sup>14</sup>    |                                                                                                                                          |
| Non Hodgkin lymphoma  | 3.7 <sup>11</sup>                    | 7.7 <sup>14</sup>   |                                                                                                                                          |
| Multiple myeloma      | 7 <sup>9</sup>                       | 36.82 <sup>10</sup> | SEER Median age standardized survival all patients, all years                                                                            |
| Leukemia <sup>9</sup> | 5                                    | 43.67 <sup>10</sup> | SEER Median age standardized survival all patients, all years                                                                            |
| ALL                   | 12                                   | 7.02 <sup>10</sup>  | SEER Median age standardized survival all patients, all years                                                                            |
| AML                   | 6                                    | 4.6 <sup>10</sup>   | SEER Median age standardized survival all patients, all years                                                                            |
| CLL                   | 6                                    | 48 <sup>15</sup>    | SEER Median age standardized survival all patients, all years                                                                            |
| CML                   | 6                                    | 4.6 <sup>10</sup>   | SEER Median age standardized survival for AML (patients with CML die in blast crisis, which is treated like AML) all patients, all years |
| Leukemia other        | 6                                    | 48 <sup>15</sup>    | SEER Median age standardized survival all patients, all years                                                                            |
| Other                 | 4.4 (mean of other cancer durations) | 15.81 <sup>10</sup> | SEER Median age standardized survival all patients, all years                                                                            |

For cancer specific procedure sequelae hospital data were used to estimate the number of cancer patients undergoing mastectomy, laryngectomy, stoma, prostatectomy, and cystectomy (step 10 in the flowchart). These proportions remained the same as in GBD 2013 and GBD 2015.<sup>8</sup> Proportions were generated by dividing the rate of procedures generated from the diagnostic codes in the hospital dataset and the coverage population by the GBD age-, and sex-specific disease incidence rates for that country. Diagnostic codes used are listed in table 4:

| Table 4. Procedure codes used to estimate cancer procedure proportions |        |                           |
|------------------------------------------------------------------------|--------|---------------------------|
| Procedure                                                              | Cancer | Procedure code (ICD-9_CM) |

|               |                         |                                                     |
|---------------|-------------------------|-----------------------------------------------------|
| Mastectomy    | Breast cancer           | 854, 8541, 8542, 8543, 8544, 8545, 8546, 8547, 8548 |
| Laryngectomy  | Larynx cancer           | 301, 303, 304, 3029                                 |
| Stoma         | Colon and rectum cancer | 461, 4610, 4611, 4613, 4862                         |
| Cystectomy    | Bladder cancer          | 5771, 5779                                          |
| Prostatectomy | Prostate                | 603, 604, 605, 606, 6062                            |

To estimate procedure-related disability for certain cancers, the procedure proportions (proportion of cancer population that undergoes procedures) from hospital data was used as input for a proportion model in DisMod-MR 2.1 in order to estimate the proportions for all locations, by age, and by sex.

Since colostomy or ileostomy procedures are done for reasons other than cancer a literature review was done to determine the proportion of ostomies due to colorectal cancer. The “all cause” colostomy proportions were multiplied by 0.58 based on the results of the literature review showing that on average 58% of ostomies are done for colorectal cancer.<sup>16–18</sup>

The final procedure proportions were applied to the incidence cases of the respective cancers and multiplied with the proportion of the incidence population surviving for 10 years to determine the incident cases of the cancer population that underwent procedures. These incident cases were used again as an input for DisMod-MR 2.1 with a remission specification of zero and an excess mortality rate prior of 0 to 0.1. This approach was different compared to GBD 2015 where we used the cause-specific mortality of the specific cancer to obtain prevalence of the sequela. The approach was changed since the mortality for the population undergoing disease specific procedures (e.g. mastectomy for breast cancer) is likely closer to the general population after they have survived for a period of time compared to the cause-specific mortality of the underlying disease (e.g. breast cancer).

Since disability associated with prostatectomy comes from impotence and incontinence and not from the prostatectomy itself 18% of the prostatectomy prevalence was assumed to be incontinent and 55% was assumed to be impotent based on a literature review done for GBD 2013.<sup>19–26</sup>

Since all sequelae for a cause need to be mutually exclusive, the controlled phase for the cancers with additional procedure related disability was adjusted to only include the population without procedure related disability (= controlled phases prevalence of the total population – controlled phase prevalence of the proportion that experienced procedure related disability) (step 11 in the flowchart). The disability weight for the prevalence of the population that experiences additional disability was adjusted to reflect the combined disability of the controlled phase as well as the procedure.

Lastly, the procedure sequelae prevalence and general sequelae prevalence were multiplied with disability weights (Table 5) for the procedures to obtain the number of YLDs (steps 11, 12, 13 in the flowchart). The sum of these YLDs is the final YLD estimate associated with each cancer.

| Table 5. Lay description and disability weights |                 |          |                      |
|-------------------------------------------------|-----------------|----------|----------------------|
| Health state                                    | Lay description | Estimate | Uncertainty interval |
|                                                 |                 |          |                      |

|                                                          |                                                                                                                                                                                          |       |       |       |
|----------------------------------------------------------|------------------------------------------------------------------------------------------------------------------------------------------------------------------------------------------|-------|-------|-------|
| Cancer, diagnosis and primary therapy (cancer_diagnosis) | This person has pain, nausea, fatigue, weight loss and high anxiety.                                                                                                                     | 0.288 | 0.193 | 0.399 |
| Cancer, controlled phase (generic_medication)            | This person has a chronic disease that requires medication every day and causes some worry but minimal interference with daily activities.                                               | 0.049 | 0.031 | 0.072 |
| Cancer, metastatic (cancer_metastatic)                   | This person has severe pain, extreme fatigue, weight loss and high anxiety.                                                                                                              | 0.451 | 0.307 | 0.600 |
| Terminal phase, with medication (cancer_terminal_treat)  | This person has lost a lot of weight and regularly uses strong medication to avoid constant pain. The person has no appetite, feels nauseous, and needs to spend most of the day in bed. | 0.540 | 0.377 | 0.687 |
| Mastectomy (cancer_mastectomy)                           | This person had one of her breasts removed and sometimes has pain or swelling in the arms.                                                                                               | 0.036 | 0.020 | 0.057 |
| Stoma (cancer_stoma)                                     | This person has a pouch attached to an opening in the belly to collect and empty stools.                                                                                                 | 0.095 | 0.063 | 0.131 |
| Laryngectomy (speech_problems)                           | This person has difficulty speaking, and others find it difficult to understand.                                                                                                         | 0.051 | 0.032 | 0.078 |
| Urinary incontinence (incontinence)                      | This person cannot control urinating.                                                                                                                                                    | 0.139 | 0.094 | 0.198 |
| Impotence (impotence)                                    | This person has difficulty in obtaining or maintaining an erection.                                                                                                                      | 0.017 | 0.009 | 0.030 |

### Estimating non-melanoma skin cancer (squamous and basal cell carcinoma)

Mortality due to squamous cell skin cancer was estimated in the same way that all other cancers were estimated using the same methods as in GBD 2015 with the exception that only vital registration system data (and not cancer registry data) was the sources for squamous cell cancer mortality. CODEm models were run to generate estimates for all countries, years, and age groups by sex. As in GBD 2015 for basal cell carcinoma of the skin (BCC) we did not estimate any mortality given that this is a very rare event. We estimated squamous cell and basal cell skin cancer incidence by using cancer registry as well as primary literature data for incidence. Only cancer registries that were listed in CI5 VIII as registering squamous cell carcinoma or basal cell carcinoma respectively, were included in the analysis.<sup>27</sup> For cancer registry data reported at the three digit level (C44: Other and unspecified malignant neoplasm of skin),

proportions from Karagas et al were used to split C44 into squamous cell carcinoma and basal cell carcinoma.<sup>28</sup> We did not add any new data compared to GBD 2015. DisMod-MR 2.1 was used to model incidence and prevalence. Prevalence was calculated as function of two extreme scenarios (duration 1 versus 5 years). Country, age, sex and year specific duration was estimated using a country-age-sex-year specific relative access-to-care-score.

The access to care score was based on the melanoma mortality to incidence ratio:

$$Access\ to\ care = 1 - \frac{Age\ standardized\ MIR_{cys} - Age\ standardized\ MIR_{min}}{Age\ standardized\ MIR_{max} - Age\ standardized\ MIR_{min}}$$

c=country; y=year; s=sex; Age-standardized MI ratio<sub>min</sub>=lowest MIR for all countries and years; Age standardized MIR<sub>max</sub>=highest MIR for all countries and years

Remission was calculated as the inverse of the duration estimates and used as additional input for DisMod-MR 2.1.

To reflect differing degrees of disability due to squamous cell carcinoma we used three levels of severity that were derived from MEPS. Prevalence was multiplied by distinct disability weights (Table 6) to generated YLDs.

| Table 6. Lay description and disability weights |                                        |                                                                                                                                                                                                                            |                                    |
|-------------------------------------------------|----------------------------------------|----------------------------------------------------------------------------------------------------------------------------------------------------------------------------------------------------------------------------|------------------------------------|
| Cause                                           | Health state                           |                                                                                                                                                                                                                            | Estimate with uncertainty interval |
| Cutaneous squamous cell carcinoma, mild         | Disfigurement, level 1                 | has a slight, visible physical deformity that others notice, which causes some worry and discomfort.                                                                                                                       | 0.011<br>(0.005-0.021)             |
| Cutaneous squamous cell carcinoma, moderate     | Disfigurement, level 2                 | has a visible physical deformity that causes others to stare and comment. As a result, the person is worried and has trouble sleeping and concentrating.                                                                   | 0.067<br>(0.044-0.096)             |
| Cutaneous squamous cell carcinoma, severe       | Disfigurement, level 3, with itch/pain | has an obvious physical deformity that is very painful and itchy. The physical deformity makes others uncomfortable, which causes the person to avoid social contact, feel worried, sleep poorly, and think about suicide. | 0.576<br>(0.401-0.731)             |
| Disfigurement due to basal cell carcinoma       | Disfigurement, level 1                 | has a slight, visible physical deformity that others notice, which causes some worry and discomfort.                                                                                                                       | 0.011<br>(0.005-0.021)             |



There are no other significant changes to the GBD 2016 neoplasms modeling process.

## References

- 1 GBD Mortality and Causes of Death Collaborators. Global, regional, and national life expectancy, all-cause and cause specific mortality for 249 causes of death, 1980–2015: a systematic analysis for the Global Burden of Disease Study 2015. *The Lancet* 2016; published online Aug.
- 2 Sankaranarayanan R, Swaminathan R, World Health Organization, International Agency for Research on Cancer, editors. Cancer survival in Africa, Asia, the Caribbean and Central America. Lyon, France: International Agency for Research on Cancer, World Health Organization, 2011.
- 3 National Center for Health Statistics, Centers for Disease Control and, Prevention. US Mortality Files. 61-Year Trends in U.S. Cancer Death Rates. [http://seer.cancer.gov/archive/csr/1975\\_2010/results\\_merged/topic\\_historical\\_mort\\_trends.pdf](http://seer.cancer.gov/archive/csr/1975_2010/results_merged/topic_historical_mort_trends.pdf).
- 4 Howlader N, Noone A, Krapcho M, *et al*. SEER Cancer Statistics Review, 1975-2013. 2015; published online Nov. [http://seer.cancer.gov/csr/1975\\_2013/](http://seer.cancer.gov/csr/1975_2013/).
- 5 National Cancer Institute (United States). United States SEER Cancer Data 1973-2010. Bethesda, United States: National Cancer Institute (United States). .
- 6 Canadian Institute for Health Information (CIHI). Canada Discharge Abstract Database 1994-2009. Ottawa, Canada: Canadian Institute for Health Information (CIHI). .
- 7 Ministry of Health (Mexico). Mexico Ministry of Health Hospital Discharges 2000-2012. Mexico City, México: Ministry of Health (Mexico). .
- 8 Fitzmaurice C, Dicker D, Pain A, *et al*. The Global Burden of Cancer 2013. *JAMA Oncol* 2015; published online May 28. DOI:10.1001/jamaoncol.2015.0735.
- 9 Neal RD, Din NU, Hamilton W, *et al*. Comparison of cancer diagnostic intervals before and after implementation of NICE guidelines: analysis of data from the UK General Practice Research Database. *Br J Cancer* 2014; **110**: 584–92.
- 10 Surveillance, Epidemiology, and End Results (SEER) Program ([www.seer.cancer.gov](http://www.seer.cancer.gov)) SEER\*Stat Database: Incidence - SEER 18 Regs Research Data + Hurricane Katrina Impacted Louisiana Cases, Nov 2012 Sub (1973-2010 varying) - Linked To County Attributes - Total U.S., 1969-2011 Counties, National Cancer Institute, DCCPS, Surveillance Research Program, Surveillance Systems Branch, released April 2013, based on the November 2012 submission. .
- 11 Allgar VL, Neal RD. Delays in the diagnosis of six cancers: analysis of data from the National Survey of NHS Patients: Cancer. *Br J Cancer* 2005; **92**: 1959–70.
- 12 Neal RD, Cannings-John R, Hood K, *et al*. Excision of malignant melanomas in North Wales: effect of location and surgeon on time to diagnosis and quality of excision. *Fam Pract* 2008; **25**: 221–7.
- 13 Nolan RC, Chan MT-L, Heenan PJ. A clinicopathologic review of lethal nonmelanoma skin cancers in Western Australia. *J Am Acad Dermatol* 2005; **52**: 101–8.

- 14 Kewalramani T, Nimer SD, Zelenetz AD, *et al.* Progressive disease following autologous transplantation in patients with chemosensitive relapsed or primary refractory Hodgkin's disease or aggressive non-Hodgkin's lymphoma. *Bone Marrow Transplant* 2003; **32**: 673–9.
- 15 Esteban D, Tovar N, Jiménez R, *et al.* Patients with relapsed/refractory chronic lymphocytic leukaemia may benefit from inclusion in clinical trials irrespective of the therapy received: a case-control retrospective analysis. *Blood Cancer J* 2015; **5**: e356.
- 16 Canova C, Giorato E, Roveron G, Turrini P, Zanotti R. Validation of a stoma-specific quality of life questionnaire in a sample of patients with colostomy or ileostomy. *Colorectal Dis Off J Assoc Coloproctology G B Irel* 2013; **15**: e692-698.
- 17 Caricato M, Ausania F, Ripetti V, Bartolozzi F, Campoli G, Coppola R. Retrospective analysis of long-term defunctioning stoma complications after colorectal surgery. *Colorectal Dis Off J Assoc Coloproctology G B Irel* 2007; **9**: 559–61.
- 18 Erwin-Toth P, Thompson SJ, Davis JS. Factors impacting the quality of life of people with an ostomy in North America: results from the Dialogue Study. *J Wound Ostomy Cont Nurs Off Publ Wound Ostomy Cont Nurses Soc WOCN* 2012; **39**: 417-422; quiz 423-424.
- 19 Catalona WJ, Carvalhal GF, Mager DE, Smith DS. Potency, continence and complication rates in 1,870 consecutive radical retropubic prostatectomies. *J Urol* 1999; **162**: 433–8.
- 20 Donnellan SM, Duncan HJ, MacGregor RJ, Russell JM. Prospective assessment of incontinence after radical retropubic prostatectomy: objective and subjective analysis. *Urology* 1997; **49**: 225–30.
- 21 Eastham JA, Kattan MW, Rogers E, *et al.* Risk factors for urinary incontinence after radical prostatectomy. *J Urol* 1996; **156**: 1707–13.
- 22 Kundu SD, Roehl KA, Eggener SE, Antenor JAV, Han M, Catalona WJ. Potency, continence and complications in 3,477 consecutive radical retropubic prostatectomies. *J Urol* 2004; **172**: 2227–31.
- 23 Potosky AL, Davis WW, Hoffman RM, *et al.* Five-Year Outcomes After Prostatectomy or Radiotherapy for Prostate Cancer: The Prostate Cancer Outcomes Study. *JNCI J Natl Cancer Inst* 2004; **96**: 1358–67.
- 24 Sacco E, Prayer-Galetti T, Pinto F, *et al.* Urinary incontinence after radical prostatectomy: incidence by definition, risk factors and temporal trend in a large series with a long-term follow-up. *BJU Int* 2006; **97**: 1234–41.
- 25 Stanford JL, Feng Z, Hamilton AS, *et al.* Urinary and sexual function after radical prostatectomy for clinically localized prostate cancer: the Prostate Cancer Outcomes Study. *JAMA* 2000; **283**: 354–60.
- 26 Walsh PC, Marschke P, Ricker D, Burnett AL. Patient-reported urinary continence and sexual function after anatomic radical prostatectomy. *Urology* 2000; **55**: 58–61.
- 27 Parkin D, Whelan S, Ferlay J, Teppo L, Thomas D. Cancer Incidence in Five Continents VIII. Lyon: IARC, 2002.

28 Karagas MR, Greenberg ER, Spencer SK, Stukel TA, Mott LA. Increase in incidence rates of basal cell and squamous cell skin cancer in New Hampshire, USA. New Hampshire Skin Cancer Study Group. *Int J Cancer J Int Cancer* 1999; **81**: 555–9.

# Rheumatic Heart Disease

## Flowchart

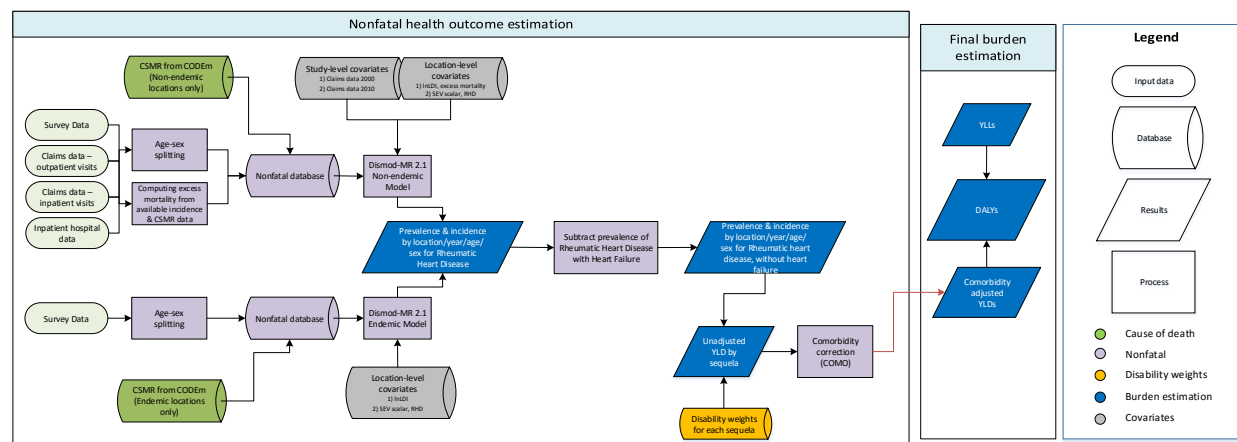

## Input data and methodological appendix

### Case definition

Rheumatic heart disease (RHD) was defined as a clinical diagnosis by a physician with or without confirmation using echocardiography. This case definition for echocardiographic confirmation of RHD follows the World Heart Federation criteria for echocardiographic diagnosis of rheumatic heart disease (1).

| Criterion             | Definition                                                                                        |
|-----------------------|---------------------------------------------------------------------------------------------------|
| 1. Echocardiography   | Prevalent rheumatic heart disease based on echocardiographic assessment and clinical confirmation |
| 2. Clinical diagnosis | Prevalent rheumatic heart disease based on physician diagnosis                                    |

ICD codes for data included from hospital records can be found in Methods Appendix Table 4.

### Input data

#### Model inputs

We did not perform a systematic review for GBD 2016. A systematic review was performed for GBD 2013 and updated for GBD 2015. The GBD 2015 search information encompassed the following:

- Search terms: ('rheumatic heart disease' AND epidemiology[MeSH Subheading]) OR ('acute rheumatic fever' AND epidemiology[MeSH Subheading]) OR ('rheumatic fever' AND epidemiology[MeSH Subheading]) OR (RHD AND epidemiology[MeSH Subheading]) OR ('valvular heart disease' AND epidemiology[MeSH Subheading]) OR (((streptococcus OR streptococci) AND heart) AND epidemiology[MeSH Subheading]) OR (heart AND valve AND

disease AND epidemiology[MeSH Subheading]) OR ('mitral valve stenosis' AND epidemiology[MeSH Subheading]) OR (('rheumatic heart disease' OR 'rheumatic fever') AND prevalence) OR (('rheumatic heart disease' OR 'rheumatic fever') AND incidence) OR (('rheumatic heart disease' OR 'rheumatic fever') AND ('standardized mortality ratio' OR SMR)) OR ('rheumatic heart disease' OR 'rheumatic fever' AND 'case fatality')

- Dates included in search: 1/1/2013 – 3/16/2015
- Number of initial hits: 2,045
- Number of sources included: 17

These differed from the GBD 2013 search terms:

- (hasabstract[text] AND Humans[Mesh] AND middle age[MeSH]) OR 21) AND ((rheumatic heart disease/epidemiology[Mesh] OR rheumatic heart disease/mortality[Mesh]) AND (prevalence[Title/Abstract] OR incidence[Title/Abstract]) AND ("2010"[Date - Publication] : "3000"[Date - Publication]) AND (hasabstract[text] AND Humans[Mesh] AND middle age[MeSH]))

The table below illustrates the number of literature studies included in GBD 2016, as well as the number of countries or subnational units and GBD world regions represented.

| Endemic model          |            |           |                |
|------------------------|------------|-----------|----------------|
|                        | Prevalence | Incidence | Mortality risk |
| Studies                | 54         | 0         | 0              |
| Countries/subnationals | 29         | 0         | 0              |
| GBD world regions      | 9          | 0         | 0              |

| Non-endemic model      |            |           |                |
|------------------------|------------|-----------|----------------|
|                        | Prevalence | Incidence | Mortality risk |
| Studies                | 8          | 0         | 0              |
| Countries/subnationals | 5          | 0         | 0              |
| GBD world regions      | 5          | 0         | 0              |

We did not include any non-literature-based data types other than the hospital and claims data described elsewhere. Hospital and claims data were available only for the non-endemic country model. We used uncorrected inpatient hospital data as **the** correction factors generated using US claims data were exceptionally high (~100X) and could not be validated using data sources from other locations. As patterns of disease and access to care vary widely, using uncorrected hospital data avoids inappropriately scaling inpatient data in other countries based on the very high use of RHD codes in the US in all-position diagnosis and outpatient claims data. We excluded all outpatient data, as they were implausibly low when compared with inpatient data from the same locations and claims data.

For the non-endemic country model, we included study-level covariates for inpatient hospital data and claims data from 2000 and 2010 to adjust these data points, using as reference the data obtained from literature and claims data from 2012.

*Severity splits and disability weights*

| Severity level                                       | Lay description                                                                                                                | DW (95% CI)         |
|------------------------------------------------------|--------------------------------------------------------------------------------------------------------------------------------|---------------------|
| Rheumatic heart disease, not including heart failure | Has a chronic disease that requires medication every day and causes some worry but minimal interference with daily activities. | 0.049 (0.031–0.072) |

## Modelling strategy

For GBD 2016 estimation, we ran two models – one for non-endemic countries and one for endemic countries. We defined endemicity based on GBD 2016 RHD mortality estimates and the Socio-demographic Index estimates (SDI) for the year 2016. For mortality, we used a threshold of 0.15/100,000 deaths in children aged 5-9; for SDI, we used a cutpoint of 0.6. These thresholds were selected using as priors expert opinion on locations where RHD is known to be endemic. Locations above the threshold for deaths or below the threshold for SDI were categorised as endemic; all other locations were categorised as non-endemic. For GBD 2015, these decisions were made at the country level. For GBD 2016, they were made at the national level for countries modelled nationally, and at the subnational level for the subset of countries modelled subnationally.

**Non-endemic model:** We included hospital data, claims data, and limited literature data on prevalence. We also included CSMR from our mortality estimates of RHD for non-endemic locations only. A prior of no remission was set, and excess mortality was capped at 0.1 for all ages. We included study-level covariates for claims data from 2000 and 2010, cross-walking them to data from the literature and claims data in 2012. We also included the log-transformed age-standardised SEV scalar for RHD and the natural log of lagged distributed income (lnLDI, I\$ per capita) as a country-level covariates for prevalence and excess mortality, respectively.

**Endemic model:** We included prevalence data from surveys published in the literature. As with the high-income model, we included CSMR from our mortality estimates of RHD for endemic locations only. A prior of no remission was set for all ages, and excess mortality was capped at 0.07, the highest observed mean excess mortality rate data point observed in this model. We also set priors of 0 on incidence for ages 0 to 1 and 50 to 100 to account for patterns of incidence in endemic countries. We used lnLDI as fixed-effect country-level covariates on prevalence and excess mortality, enforcing an inverse relationship for both. The log-transformed, age-standardized SEV scalar was also used as a fixed-effect country-level covariate on prevalence.

We combined estimates from the endemic and non-endemic models, selecting estimates for the locations identified as non-endemic from the non-endemic model and estimates for the locations identified as endemic from the endemic model. Estimates of heart failure due to RHD were then subtracted from the estimates for RHD, giving the overall prevalence of RHD without heart failure. A description of the modelling strategy for heart failure due to RHD can be found in the Heart Failure appendix. We evaluated models based on comparing estimates with input data as well as estimates from previous rounds of GBD.

The table below shows the country covariates, parameters, betas, and exponentiated betas:

| Covariate            | Parameter | beta | Exponentiated beta |
|----------------------|-----------|------|--------------------|
| <i>Endemic model</i> |           |      |                    |

|                                                  |                       |                       |                    |
|--------------------------------------------------|-----------------------|-----------------------|--------------------|
| Log-transformed age-standardized SEV scalar: RHD | Prevalence            | 0.93 (0.76 – 1.22)    | 2.55 (2.13 – 3.37) |
| LDI (I\$ per capita)                             | Excess mortality rate | -0.28 (-0.48 – -0.11) | 0.76 (0.62 – 0.90) |
| <i>Non-endemic model</i>                         |                       |                       |                    |
| All Marketscan, year 2000                        | Study-level           | 0.19 (0.090 – 0.30)   | 1.21 (1.09 – 1.34) |
| All Marketscan, year 2010                        | Study-level`          | 0.44 (0.36 – 0.52)    | 1.55 (1.43 – 1.68) |
| Log-transformed age-standardized SEV scalar: RHD | Prevalence            | 0.78 (0.75 – 0.89)    | 2.19 (2.12 – 2.43) |
| LDI (I\$ per capita)                             | Excess mortality rate | -0.54 (-0.57 – -0.5)  | 0.58 (0.57 – 0.61) |

We changed the process of selecting locations for the endemic and non-endemic models. In previous rounds, this decision had been based on country development status and income level, and the models were referred to as low-income and high-income. However, because these models are trying to capture differences between locations where RHD is endemic and locations where the disease is extremely rare, we are now using death data and the Socio-demographic Index to identify which model should be used for estimates for each location. In addition, we are now making this determination at the subnational level for the relevant countries.

**Endemic Locations:** North Korea, Cambodia, Laos, Maldives, Myanmar, Philippines, Timor-Leste, Fiji, Kiribati, Marshall Islands, Federated States of Micronesia, Papua New Guinea, Samoa, Solomon Islands, Tonga, Vanuatu, Azerbaijan, Georgia, Tajikistan, Turkmenistan, Uzbekistan, Albania, Belize, Dominica, Dominican Republic, Grenada, Guyana, Haiti, Jamaica, Saint Lucia, Saint Vincent and the Grenadines, Suriname, Bolivia, Ecuador, Guatemala, Honduras, Nicaragua, Algeria, Egypt, Iran, Iraq, Libya, Morocco, Palestine, Syria, Yemen, Afghanistan, Bangladesh, Bhutan, Nepal, Pakistan, Angola, Central African Republic, Congo, Democratic Republic of the Congo, Burundi, Comoros, Djibouti, Eritrea, Ethiopia, Madagascar, Malawi, Mauritius, Mozambique, Rwanda, Somalia, Tanzania, Uganda, Zambia, Lesotho, Namibia, Swaziland, Zimbabwe, Benin, Burkina Faso, Cameroon, Cape Verde, Chad, Cote d'Ivoire, The Gambia, Ghana, Guinea, Guinea-Bissau, Liberia, Mali, Mauritania, Niger, Nigeria, Sao Tome and Principe, Senegal, Sierra Leone, Togo, American Samoa, Guam, South Sudan, Eastern Cape, Free State, Gauteng, KwaZulu-Natal, Limpopo, Mpumalanga, North-West, Northern Cape, Western Cape, Chongqing, Gansu, Guizhou, Hainan, Inner Mongolia, Qinghai, Tibet, Xinjiang, Yunnan, Sudan, Sumatera Barat, Bengkulu, Kalimantan Utara, Jawa Tengah, Bali, Nusa Tenggara Barat, Nusa Tenggara Timur, Kalimantan Barat, Kalimantan Tengah, Kalimantan Selatan, Kalimantan Timur, Sulawesi Utara, Sulawesi Tengah, Sulawesi Tenggara, Gorontalo, Sulawesi Barat, Maluku, Maluku Utara, Papua Barat, Papua, Acre, Amapá, Bahia, Goiás, Maranhão, Pará, Pernambuco, Piauí, Sergipe, Tocantins, Baringo, Bomet, Bungoma, Busia, Elgeyo-Marakwet, Embu, Garissa, HomaBay, Isiolo, Kajiado, Kakamega, Kericho, Kilifi, Kirinyaga, Kisii, Kisumu, Kitui, Kwale, Laikipia, Lamu, Machakos, Makueni, Mandera, Marsabit, Meru, Migori, Mombasa, Murang'a, Nairobi, Nakuru, Nandi, Narok, Nyamira, Nyandarua, Nyeri, Samburu, Siaya, TaitaTaveta, TanaRiver, TharakaNithi, TransNzoia, Turkana, UasinGishu, Vihiga, Wajir, WestPokot, Andhra Pradesh, Urban, Assam, Urban, Bihar, Urban, Chhattisgarh, Urban, Delhi, Urban, Goa, Urban, Gujarat, Urban, Haryana, Urban, Himachal Pradesh, Urban, Jammu and Kashmir, Urban, Jharkhand, Urban, Karnataka, Urban, Kerala, Urban, Madhya Pradesh, Urban, Maharashtra, Urban, Manipur, Urban, Meghalaya, Urban, Odisha, Urban, Punjab, Urban, Rajasthan, Urban, Tamil Nadu, Urban, Telangana, Urban, Tripura, Urban, Uttar Pradesh, Urban, Uttarakhand, Urban, West Bengal, Urban, Andhra Pradesh, Rural, Arunachal Pradesh, Rural, Assam, Rural, Bihar, Rural, Chhattisgarh, Rural, Delhi, Rural, Gujarat, Rural, Haryana, Rural, Himachal



Pradesh, Rural, Jammu and Kashmir, Rural, Jharkhand, Rural, Karnataka, Rural, Kerala, Rural, Madhya Pradesh, Rural, Maharashtra, Rural, Manipur, Rural, Meghalaya, Rural, Nagaland, Rural, Odisha, Rural Punjab, Rural, Rajasthan, Rural, Sikkim, Rural, Tamil Nadu, Rural, Telangana, Rural, Tripura, Rural, Uttar Pradesh, Rural, Uttarakhand, Rural, West Bengal, Rural, The Six Minor Territories, Rural, The Six Minor Territories, Urban

**Non-endemic Locations:** Taiwan, Malaysia, Sri Lanka, Thailand, Vietnam, Armenia, Kazakhstan, Kyrgyzstan, Mongolia, Bosnia and Herzegovina, Bulgaria, Croatia, Czech Republic, Hungary, Macedonia, Montenegro, Poland, Romania, Serbia, Slovakia, Slovenia, Belarus, Estonia, Latvia, Lithuania, Moldova, Russia, Ukraine, Brunei, South Korea, Singapore, Australia, New Zealand, Andorra, Austria, Belgium, Cyprus, Denmark, Finland, France, Germany, Greece, Iceland, Ireland, Israel, Italy, Luxembourg, Malta, Netherlands, Norway, Portugal, Spain, Switzerland, Argentina, Chile, Uruguay, Canada, Antigua and Barbuda, The Bahamas, Barbados, Cuba, Trinidad and Tobago, Peru, Colombia, Costa Rica, El Salvador, Panama, Venezuela, Paraguay, Bahrain, Jordan, Kuwait, Lebanon, Oman, Qatar, Tunisia, Turkey, United Arab Emirates, Equatorial Guinea, Gabon, Seychelles, Botswana, Bermuda, Greenland, Hong Kong Special Administrative Region of China, Macao Special Administrative Region of China, Northern Mariana Islands, Puerto Rico, Virgin Islands, U.S., Northern Ireland, Scotland, Anhui, Beijing, Fujian, Guangdong, Guangxi, Hebei, Heilongjiang, Henan, Hubei, Hunan, Jiangsu, Jiangxi, Jilin, Liaoning, Ningxia, Shaanxi, Shandong, Shanghai, Shanxi, Sichuan, Tianjin, Zhejiang, Alabama, Alaska, Arizona, Arkansas, California, Colorado, Connecticut, Delaware, District of Columbia, Florida, Georgia, Hawaii, Idaho, Illinois, Indiana, Iowa, Kansas, Kentucky, Louisiana, Maine, Maryland, Massachusetts, Michigan, Minnesota, Mississippi, Missouri, Montana, Nebraska, Nevada, New Hampshire, New Jersey, New Mexico, New York, North Carolina, North Dakota, Ohio, Oklahoma, Oregon, Pennsylvania, Rhode Island, South Carolina, South Dakota, Tennessee, Texas, Utah, Vermont, Virginia, Washington, West Virginia, Wisconsin, Wyoming, Wales, Aguascalientes, Baja California, Baja California Sur, Campeche, Coahuila, Colima, Chiapas, Chihuahua, Distrito Federal, Durango, Guanajuato, Guerrero, Hidalgo, Jalisco, México, Michoacán de Ocampo, Morelos, Nayarit, Nuevo León, Oaxaca, Puebla, Querétaro, Quintana Roo, San Luis Potosí, Sinaloa, Sonora, Tabasco, Tamaulipas, Tlaxcala, Veracruz de Ignacio de la Llave, Yucatán, Zacatecas, Aceh, Sumatera Utara, Riau, Jambi, Sumatera Selatan, Lampung, Bangka Belitung, Kepulauan Riau, Jakarta, Jawa Barat, Yogyakarta, Jawa Timur, Banten, Sulawesi Selatan, Alagoas, Amazonas, Ceará, Distrito Federal, Espírito Santo, Minas Gerais, Mato Grosso do Sul, Mato Grosso, Paraíba, Paraná, Rio de Janeiro, Rio Grande do Norte, Rondônia, Roraima, Rio Grande do Sul, Santa Catarina, São Paulo, Sweden except Stockholm, Stockholm, Hokkaidō, Aomori, Iwate, Miyagi, Akita, Yamagata, Fukushima, Ibaraki, Tochigi, Gunma, Saitama, Chiba, Tōkyō, Kanagawa, Niigata, Toyama, Ishikawa, Fukui, Yamanashi, Nagano, Gifu, Shizuoka, Aichi, Mie, Shiga, Kyōto, Ōsaka, Hyōgo, Nara, Wakayama, Tottori, Shimane, Okayama, Hiroshima, Yamaguchi, Tokushima, Kagawa, Ehime, Kōchi, Fukuoka, Saga, Nagasaki, Kumamoto, Ōita, Miyazaki, Kagoshima, Okinawa, Kiambu, Arunachal Pradesh, Urban, Mizoram, Urban, Nagaland, Urban, Sikkim, Urban, Goa, Rural, Mizoram, Rural, Ha'il, Qassim, Riyadh, Tabuk, Madinah, Makkah, Bahah, Northern Borders, Jawf, Jizan, 'Asir, Najran, Eastern Province, Darlington, Northumberland, Stockton-on-Tees, Newcastle upon Tyne, North Tyneside, Redcar and Cleveland, County Durham, Gateshead, Middlesbrough, South Tyneside, Sunderland, Hartlepool, Cheshire East, Stockport, Trafford, Cheshire, West and Chester, Sefton, Lancashire, Cumbria, Bolton, Wirral, Bury, St Helens, Warrington, Oldham, Rochdale, Wigan, Halton, Liverpool, Tameside, Salford, Blackburn with Darwen, Knowsley, Blackpool, Manchester, North Yorkshire, East Riding of Yorkshire, York, North East Lincolnshire, Calderdale, North Lincolnshire, Bradford, Kirklees, Leeds, Sheffield, Wakefield, Rotherham, Doncaster, Kingston upon Hull, City of Barnsley, Northamptonshire, Leicestershire, Lincolnshire, Rutland, Derby, Derbyshire, Nottinghamshire, Nottingham, Leicester, Warwickshire, Herefordshire, County of, Solihull, Shropshire, Worcestershire, Staffordshire, Dudley, Coventry, Telford and Wrekin, Stoke-on-Trent, Walsall,

Wolverhampton, Birmingham, Sandwell, Bedford, Central Bedfordshire, Suffolk, Hertfordshire, Essex, Cambridgeshire, Thurrock, Norfolk, Southend-on-Sea, Peterborough, Luton, Richmond upon Thames, Kensington and Chelsea, Barnet, Westminster, Bromley, Bexley, Redbridge, Merton, Brent, Hillingdon, Havering, Kingston upon Thames, Sutton, Harrow, Enfield, Croydon, Hammersmith and Fulham, Ealing, Greenwich, Wandsworth, Waltham Forest, Camden, Lambeth, Lewisham, Hounslow, Southwark, Newham, Barking and Dagenham, Haringey, Hackney, Islington, Tower Hamlets, Wokingham, Buckinghamshire, Surrey, Windsor and Maidenhead, West Berkshire, Hampshire, Bracknell Forest, West Sussex, Oxfordshire, Reading, Kent, Brighton and Hove, Medway, East Sussex, Portsmouth, Isle of Wight, Milton Keynes, Southampton, Slough, South Gloucestershire, Dorset, Wiltshire, North Somerset, Devon, Poole, Bath and North East Somerset, Gloucestershire, Somerset, Swindon, Torbay, Bristol, City of Bournemouth, Cornwall, Plymouth

Other than this update to model assignment, there were no substantive changes in the modelling strategy from GBD 2015.

1. Reményi, B. et al. *Nat. Rev. Cardiol.* 9, 297–309 (2012); published online 28 February 2012

# Ischemic Heart Disease

## Flowchart

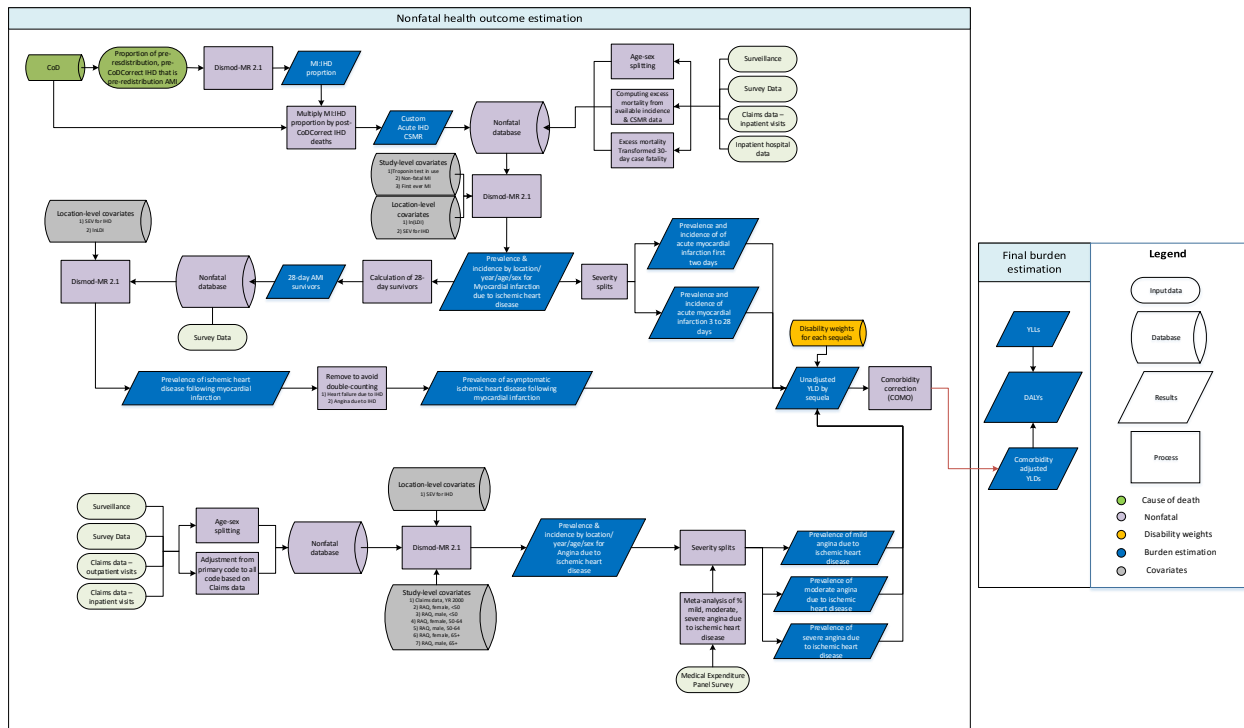

## Input data and methodological summary

### Case definition

#### Case definitions:

- 1) Acute myocardial infarction (MI): Definite and possible MI according to the third universal definition of myocardial infarction:
  - a. When there is clinical evidence of myocardial necrosis in a clinical setting consistent with myocardial ischemia or
  - b. Detection of a rise and/or fall of cardiac biomarker values and with at least one of the following: i) symptoms of ischaemia, ii) new or presumed new ST-segment-T wave changes or new left bundle branch block, iii) development of pathological Q waves in the ECG, iv) imaging evidence of new loss of viable myocardium or new regional wall motion abnormality, or v) identification of an intracoronary thrombus by angiography or autopsy.
  - c. Sudden (abrupt) unexplained cardiac death, involving cardiac arrest or no evidence of a noncoronary cause of death
  - d. Prevalent MI is considered to last from the onset of the event to 28 days after the event and is divided into an acute phase (0–2 days) and subacute (3–28 days).

## 2) Chronic IHD

- a. Angina; clinically diagnosed stable exertional angina pectoris or definite angina pectoris according to the Rose Angina Questionnaire, physician diagnosis, or taking nitrate medication for the relief of chest pain.
- b. Asymptomatic ischemic heart disease following myocardial infarction; survival to 28 days following incident MI. The GBD study does not use estimates based on ECG evidence for prior MI, due to its limited specificity and sensitivity (1).

ICD codes used for inclusion of hospital and claims data for MI and angina can be found in Methods Appendix Table 4.

## Input data

### *Model inputs*

#### Myocardial infarction

A systematic review for myocardial infarction was not performed for GBD 2016. Updates to systematic reviews are performed on an ongoing schedule across all GBD causes; an update for myocardial infarction will be performed in the next one to two iterations.

A systematic review was done for myocardial infarction for GBD 2015. The search strings used were extensive; a full list will be provided on request.

The dates of the search were 1/1/2009 – 2/3/2015. 38,522 studies were returned; 194 were extracted (this number includes extractions that were done for STEMI/NSTEMI models and revascularization models that are not currently part of the MI modelling process but may be in the future).

A systematic review for myocardial infarction was also done for GBD 2013. The extensive search terms for that review can be found here will be provided on request.

|                        | Prevalence | Incidence | Mortality risk |
|------------------------|------------|-----------|----------------|
| Studies                | 0          | 93        | 61             |
| Countries/subnationals | 0          | 39        | 32             |
| GBD world regions      | 0          | 8         | 10             |

Apart from inpatient hospital and inpatient claims data, we did not include any data from sources other than the literature for myocardial infarction. We excluded data with broad age ranges where it was impossible to obtain more granular data, as these data caused the known age pattern for increased risk of myocardial infarction to be masked in the estimates generated from DisMod.

We corrected inpatient hospital data outside of DisMod to account for the fact that these data sources do not capture the out-of-hospital cardiac arrest deaths which are part of the universal definition of MI. Using as a model the adjustment factors developed to translate tobacco consumption prevalence to tobacco consumption frequency, we matched administrative hospital data to population-based literature data based on age group, sex, and super region (1). For the adjustment factor, we developed the following generalized additive model on matched data

$$\ln(\mu_{ref,i}) = \beta_0 + \beta_1 \ln(\mu_{b,i}) + s(age_i) + \varepsilon_i$$

Where  $i$  represents a given matched observation,  $age$  signifies the data point's age group,  $s(x)$  represents a penalized spline where the smoothing parameter is chosen through cross validation and  $\mu_{ref}$  and  $\mu_b$  denote the mean of the data point from literature and the mean of the inpatient hospital data point, respectively. Predictions from the model were then taken as the adjusted data points. The standard error of each corrected data point was adjusted to account for the uncertainty due to the correction.

We included a study-level covariate to correct for the change in diagnostic criteria to include troponin measurements within DisMod. This adjustment was applied to data collected before 2000. We also included a study-level covariate to adjust data points within DisMod that captured only first-ever MI, using studies where all events were included as the reference. We also adjusted estimates within DisMod from studies that only included non-fatal cases using study-level covariates with sources that included fatal and non-fatal cases as reference.

### Angina

A systematic review was not performed for GBD 2016. Updates to systematic reviews are performed on an ongoing schedule across all GBD causes; an update for angina will be performed in the next one to two iterations.

A systematic review for angina was not done for GBD 2015, but was for GBD 2013. The search terms for that are here: (Angina Pectoris/epidemiology[Mesh] OR Angina Pectoris/mortality[Mesh] ) AND (prevalence[Title/Abstract] OR incidence[Title/Abstract]) AND ("2010"[Date - Publication] : "3000"[Date - Publication])

### Literature data included: Angina

|                        | Prevalence | Incidence | Mortality risk |
|------------------------|------------|-----------|----------------|
| Studies                | 72         | 0         | 7              |
| Countries/subnationals | 73         | 0         | 7              |
| GBD world regions      | 20         | 0         | 5              |

We included survey data (including NHANES and World Health Study questionnaires) which included the RAQ items. Prevalence of angina was calculated using the standard algorithm to determine whether the RAQ was positive or negative.

We excluded data with broad age ranges where it was impossible to obtain more granular data, as these data caused the known age pattern for increased risk of angina to be masked in the estimates generated from DisMod.

We included sex- and age-group-specific covariates to adjust prevalence data points obtained from the RAQ using the claims data as the reference since the RAQ has been shown to be neither sensitive nor specific.

We also included US claims data, but did not include inpatient hospital data from any locations. Stable angina (unstable angina is modeled as part of MI) is expected to be rare in inpatient, but common in outpatient data as it is a condition usually managed on an outpatient basis, except for specific surgical interventions. This discrepancy leads to implausible correction factors based on inpatient/outpatient

information from claims data (~150X); thus adjusted data cannot be used. Including uncorrected data in the model is likely to lead to incorrect estimates as hospitalization and procedure rates are likely to vary between locations based on access to and patterns of care. All outpatient data was excluded as it was implausibly low for all locations when compared with literature and claims data.

### *Severity split inputs*

Acute myocardial infarction was split into two severity levels by length of time since the event – days 1 and 2 versus days 3 through 28. Disability weights were established for these two severities using the standard approach for GBD 2015.

Angina was split into mild, moderate, and severe groups using information from MEPS. Disability weights were established for these severities using the standard approach for GBD 2015.

### Acute myocardial infarction

| Severity level                         | Lay description                                                                                                                                                           | DW (95% CI)         |
|----------------------------------------|---------------------------------------------------------------------------------------------------------------------------------------------------------------------------|---------------------|
| Acute myocardial infarction, days 1-2  | Has severe chest pain that becomes worse with any physical activity. The person feels nauseated, short of breath, and very anxious.                                       | 0.432 (0.288–0.579) |
| Acute myocardial infarction, days 3-28 | Gets short of breath after heavy physical activity, and tires easily, but has no problems when at rest. The person has to take medication every day and has some anxiety. | 0.074 (0.049–0.105) |

### Angina pectoris

| Severity level  | Lay description                                                                                                                                                                                           | DW (95% CI)          |
|-----------------|-----------------------------------------------------------------------------------------------------------------------------------------------------------------------------------------------------------|----------------------|
| Mild angina     | Has chest pain that occurs with strenuous physical activity, such as running or lifting heavy objects. After a brief rest, the pain goes away.                                                            | 0.033 (0.02 – 0.052) |
| Moderate angina | Has chest pain that occurs with moderate physical activity, such as walking uphill or more than half a kilometer (around a quarter-mile) on level ground. After a brief rest, the pain goes away.         | 0.08 (0.052 – 0.113) |
| Severe angina   | Has chest pain that occurs with minimal physical activity, such as walking only a short distance. After a brief rest, the pain goes away. The person avoids most physical activities because of the pain. | 0.167 (0.11 – 0.24)  |

## Modelling strategy

### Myocardial infarction

- We first calculated custom cause-specific mortality estimates using cause of death data prior to garbage code redistribution, generating age-sex-country-specific proportions of IHD deaths that were due to MI (acute IHD) vs those due to other causes of IHD (chronic IHD). Estimates of this proportion for all locations were then generated using a DisMod proportion-only model. Due to a high degree of variability in pre-redistribution coding practices by location, we used the global age-, sex-, and year-specific proportions of acute deaths in subsequent calculations. The global proportions were multiplied by post-CodCorrect (final GBD estimates) IHD deaths to generate CSMR estimates for MI, even though GBD reports only deaths for all IHD taken together. These data, along with incidence and excess mortality data, informed a DisMod model to estimate the prevalence and incidence of myocardial infarction due to ischemic heart disease.
- These estimates were split into prevalence and incidence estimates for days 1-2 and days 3-28 post-event. Disability weights were assigned to each of these two groupings.
- We set a value prior of one month for remission (11/13) from the MI health state. We also set a value prior for the maximum excess mortality rate of 10 for all ages. We included lnLDI as a fixed-effect country-level covariate on excess mortality, forcing an inverse relationship.

| Study covariate                                  | Parameter             | Beta                  | Exponentiated beta |
|--------------------------------------------------|-----------------------|-----------------------|--------------------|
| Diagnostic blood sample (troponin)               | Incidence             | -0.45 (-0.47 – -0.44) | 0.64 (0.62 - 0.64) |
| LDI (I\$ per capita)                             | Excess mortality rate | -0.1 (-0.1 – -0.1)    | 0.9 (0.9 – 0.9)    |
| First ever MI                                    | Incidence             | -0.66 (-0.67 – -0.65) | 0.52 (0.51 – 0.52) |
| Non-fatal MI                                     | Incidence             | -0.40 (-0.41 – -0.40) | 0.67 (0.66 – 0.67) |
| Log-transformed age-standardized SEV scalar: IHD | Incidence             | 1.24 (1.21 – 1.25)    | 3.44 (3.34 – 3.49) |

### Asymptomatic ischaemic heart disease

- Excess mortality estimates from the myocardial infarction model were used to generate data of the incidence of surviving 28 days post-event.
- We used these data, along with the estimates of CSMR due to chronic IHD (the other part of the proportion described in step 1) and excess mortality data in a DisMod model to estimate the prevalence of persons with IHD following myocardial infarction. This estimate included subjects with angina and heart failure; a proportion of this prevalence was removed in order to avoid double-counting based on evidence from the literature (2). The result of this step generates estimates of asymptomatic ischaemic heart disease following myocardial infarction.
- We set a value prior of 0 for remission for all ages.
- No study- or country-level covariates were included for the model.

### Angina

- We used prevalence data from the literature and USA claims databases, along with data on mortality risk to estimate the prevalence and incidence of angina for all locations.
- The proportion of mild, moderate, and severe angina was determined by the standard approach for severity splitting for GBD 2015.
- We included a value prior of 0 for remission for all ages. We also included a value prior of 1 for excess mortality for all ages.

- We included age- and sex-specific study-level covariates to adjust data points based on RAQ, using data points from the claims database as the reference.
- We also included the log-transformed, age-standardized SEV scalar for IHD as a fixed effect country-level covariate.

| Study covariate                                  | Parameter             | Beta               | Exponentiated beta   |
|--------------------------------------------------|-----------------------|--------------------|----------------------|
| RAQ, female, less than 50                        | Prevalence            | 2.33 (2.30 – 2.40) | 10.28 (9.98 – 11.06) |
| RAQ, male, less than 50                          | Prevalence            | 0.94 (0.92 – 0.95) | 2.57 (2.51 – 2.59)   |
| RAQ, female, 50 to 64                            | Prevalence            | 1.44 (1.35 – 1.50) | 4.22 (3.87 – 4.47)   |
| RAQ, male, 50 to 64                              | Prevalence            | 0.83 (0.80 – 0.90) | 2.30 (2.23 – 2.46)   |
| RAQ, female, 65 plus                             | Prevalence            | 0.29 (0.27 – 0.30) | 1.34 (1.31 – 1.35)   |
| RAQ, male, 65 plus                               | Prevalence            | 0.19 (0.11 – 0.29) | 1.21 (1.11 – 1.33)   |
| Log-transformed age-standardized SEV scalar: IHD | Prevalence            | 1.25 (1.23 – 1.25) | 3.47 (3.43 – 3.49)   |
| LDI (I\$ per capita)                             | Excess mortality rate | -0.55 (-1 – -0.1)  | 0.58 (0.37 – 0.90)   |

There have been no substantive changes in the modelling strategy for myocardial infarction, asymptomatic ischemic heart disease following myocardial infarction, and angina from GBD 2015.

1. Reitsma, Marissa B., et al. "Smoking prevalence and attributable disease burden in 195 countries and territories, 1990–2015: a systematic analysis from the Global Burden of Disease Study 2015." *The Lancet*.



# Cerebrovascular Disease, Ischaemic Stroke & Haemorrhagic Stroke

## Flowchart

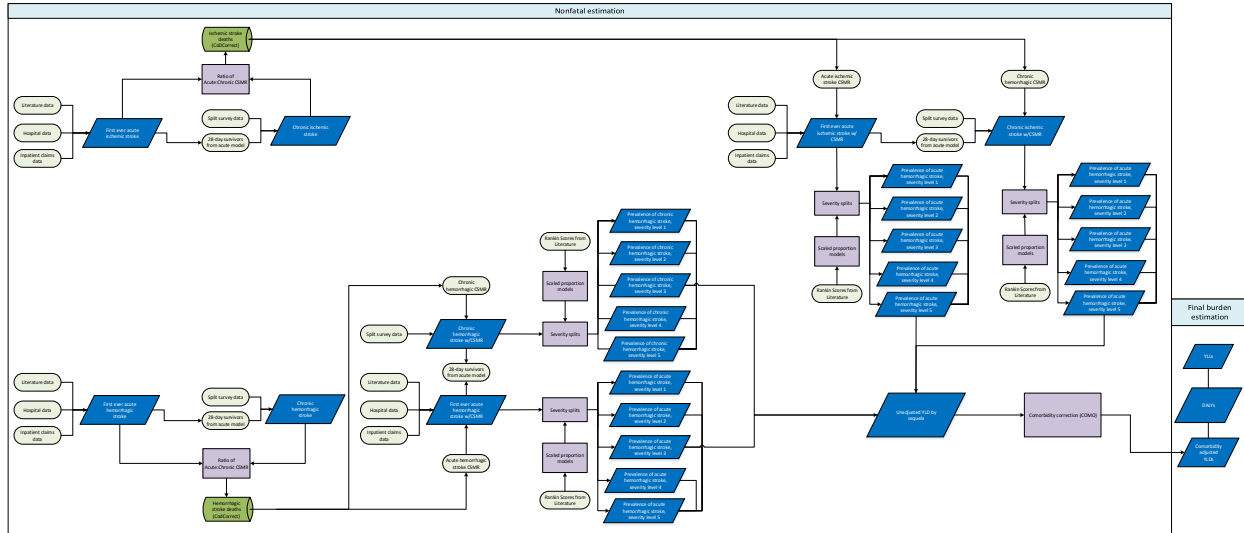

## Input data and methodological summary

### Case definition

Stroke was defined according to WHO criteria – rapidly developing clinical signs of focal (at times global) disturbance of cerebral function lasting more than 24 hours or leading to death with no apparent cause other than that of vascular origin(1). Data on transient ischaemic attack (TIA) were not included.

*Acute stroke:* Stroke cases are considered acute from the day of incidence of a first-ever stroke through day 28 following the event.

*Chronic stroke:* Stroke cases are considered chronic beginning 28 days following the occurrence of an event. Chronic stroke includes the sequelae of an acute stroke AND all recurrent stroke events. GBD 2015 adopts this broader definition of chronic stroke than was used in prior iterations in order to model acute strokes using only first-ever incident events.

*Ischaemic stroke:* Incident ischaemic stroke is defined as the occurrence of first-ever ischaemic stroke, based on clinical diagnosis by a physician using diagnostic imaging. Ischaemic strokes are considered to include all vascular events leading to limited blood flow to brain tissue, with resulting infarction, including atherosclerotic and thromboembolic strokes but excluding strokes in which the underlying cause is intracranial haemorrhage.

*Haemorrhagic or other strokes:* This cause includes all non-ischaemic strokes of a vascular cause including subarachnoid and stroke due to intracranial haemorrhage.

ICD codes used for inclusion of hospital and claims data can be found in Appendix Table 4

## Input data

### *Model inputs*

A systematic review was not performed for GBD 2016. Updates to systematic reviews are performed on an ongoing schedule across all GBD causes; an update for cerebrovascular disease will be performed in the next iteration.

A systematic review of the literature was performed in GBD 2013. The search terms used were: (stroke[Mesh]) AND (prevalence[Title/Abstract] OR incidence[Title/Abstract]) AND ("2010"[Date - Publication] : "3000"[Date - Publication]) AND (hasabstract[text] AND Humans[Mesh] AND middle age[MeSH]) (hasabstract[text] AND Humans[Mesh] AND middle age[MeSH]) OR 21) AND ((hemorrhagic stroke/epidemiology[Mesh] OR hemorrhagic stroke/mortality[Mesh]) AND (prevalence[Title/Abstract] OR incidence[Title/Abstract]) AND ("2010"[Date - Publication] : "3000"[Date - Publication]) AND (hasabstract[text] AND Humans[Mesh] AND middle age[MeSH]))

The tables below indicate the number of literature studies included in GBD 2016, as well as the number of countries or subnational units and GBD world regions represented.

### *Acute Ischaemic stroke*

|                        | Prevalence | Incidence | Mortality risk |
|------------------------|------------|-----------|----------------|
| Studies                | 0          | 73        | 14             |
| Countries/subnationals | 0          | 55        | 12             |
| GBD world regions      | 0          | 14        | 5              |

### *Acute Haemorrhagic or other stroke*

|                        | Prevalence | Incidence | Mortality risk |
|------------------------|------------|-----------|----------------|
| Studies                | 0          | 73        | 10             |
| Countries/subnationals | 0          | 51        | 11             |
| GBD world regions      | 0          | 13        | 4              |

### *Chronic Ischaemic stroke*

|                        | Prevalence | Incidence | Mortality risk |
|------------------------|------------|-----------|----------------|
| Studies                | 53         | 0         | 8              |
| Countries/subnationals | 50         | 0         | 4              |
| GBD world regions      | 14         | 0         | 2              |

### *Chronic Haemorrhagic or other stroke*

|                        | Prevalence | Incidence | Mortality risk |
|------------------------|------------|-----------|----------------|
| Studies                | 53         | 0         | 8              |
| Countries/subnationals | 50         | 0         | 4              |
| GBD world regions      | 14         | 0         | 2              |

We included inpatient hospital data, adjusted for readmission and primary to any diagnosis using correction factors estimated from US claims data. We excluded data for locations where the data points were implausibly low (Vietnam, Philippines, India). In addition, we included unpublished stroke registry data for acute ischaemic and acute haemorrhagic strokes. We also included survey data for chronic cerebrovascular disease. These surveys were identified based on expert opinion and review of major survey series focused on world health that included questions regarding self-reported history of stroke.

As with many models in GBD, the diversity of data sources available means that we needed to adjust available data to our preferred or reference case definition (2). For the first ever acute stroke models we used DisMod to estimate the statistical association between measurements taken using different case definitions and then used these estimates to adjust the non-referent datapoints. We included study-level covariates to adjust data points for first and recurrent strokes combined, using data for first strokes only as reference. We also included study-level covariates to adjust ischaemic and haemorrhagic strokes combined (all stroke), using as reference studies with subtype-specific information.

#### *Severity split inputs*

The table below illustrates the severity level, lay description, and disability weights for GBD 2016. In previous iterations of the GBD, severity splits for stroke were based on the standard approach described elsewhere (3). For GBD 2016, we undertook a review to identify epidemiologic literature which reported the degree of disability at 28 days (for acute stroke) or one year (for chronic stroke) using the modified Rankin scale (mRS) and the Mini-mental State Examination (MMSE) or the Montreal Cognitive Assessment (MoCA). The mRS assesses functional capabilities, while the MMSE and MoCA tests provide evaluations of cognitive functioning. We then mapped these measures to the existing GBD categories as indicated below. This approach allowed us to include location-specific information and can be updated as more data on functional or cognitive status become available.

#### *Acute stroke severity splits*

| Severity level                           | Lay description                                                                                                                                                              | Modified Rankin Score | Cognitive Status                       | DW (95% CI)         |
|------------------------------------------|------------------------------------------------------------------------------------------------------------------------------------------------------------------------------|-----------------------|----------------------------------------|---------------------|
| Stroke, mild                             | Has some difficulty in moving around and some weakness in one hand, but is able to walk without help.                                                                        | 1                     | N/A                                    | 0.019 (0.01–0.032)  |
| Stroke, moderate                         | Has some difficulty in moving around, and in using the hands for lifting and holding things, dressing, and grooming.                                                         | 2, 3                  | MoCA $\geq$ 24<br>or<br>MMSE $\geq$ 26 | 0.07 (0.046–0.099)  |
| Stroke, moderate plus cognition problems | Has some difficulty in moving around, in using the hands for lifting and holding things, dressing and grooming, and in speaking. The person is often forgetful and confused. | 2, 3                  | MoCA $<$ 24<br>or<br>MMSE $<$ 26       | 0.316 (0.206–0.437) |
| Stroke, severe                           | Is confined to bed or a wheelchair, has difficulty speaking, and depends on                                                                                                  | 4, 5                  | MoCA $\geq$ 24<br>or<br>MMSE $\geq$ 26 | 0.552 (0.377–0.707) |

|                                        |                                                                                                                                                                    |  |                          |                     |
|----------------------------------------|--------------------------------------------------------------------------------------------------------------------------------------------------------------------|--|--------------------------|---------------------|
|                                        | others for feeding, toileting, and dressing.                                                                                                                       |  |                          |                     |
| Stroke, severe plus cognition problems | Is confined to bed or a wheelchair, depends on others for feeding, toileting, and dressing, and has difficulty speaking, thinking clearly, and remembering things. |  | MoCA<24<br>or<br>MMSE<26 | 0.588 (0.411–0.744) |

*Chronic stroke severity splits*

| Severity level                                                   | Lay description                                                                                                                                                              | Modified Rankin Score | Cognitive Status           | DW (95% CI)         |
|------------------------------------------------------------------|------------------------------------------------------------------------------------------------------------------------------------------------------------------------------|-----------------------|----------------------------|---------------------|
| Stroke, asymptomatic                                             |                                                                                                                                                                              | 0                     | N/A                        | N/A                 |
| Stroke, long-term consequences, mild                             | Has some difficulty in moving around and some weakness in one hand, but is able to walk without help.                                                                        | 1                     | N/A                        | 0.019 (0.01–0.032)  |
| Stroke, long-term consequences, moderate                         | Has some difficulty in moving around, and in using the hands for lifting and holding things, dressing, and grooming.                                                         | 2, 3                  | MoCA>=24<br>or<br>MMSE>=26 | 0.07 (0.046–0.099)  |
| Stroke, long-term consequences, moderate plus cognition problems | Has some difficulty in moving around, in using the hands for lifting and holding things, dressing and grooming, and in speaking. The person is often forgetful and confused. | 2, 3                  | MoCA<24 or<br>MMSE<26      | 0.316 (0.206–0.437) |
| Stroke, long-term consequences, severe                           | Is confined to bed or a wheelchair, has difficulty speaking, and depends on others for feeding, toileting, and dressing.                                                     | 4, 5                  | MoCA>=24<br>or<br>MMSE>=26 | 0.552 (0.377–0.707) |
| Stroke, long-term consequences, severe plus cognition problems   | Is confined to bed or a wheelchair, depends on others for feeding, toileting, and dressing, and has difficulty speaking, thinking clearly, and remembering things.           | 4, 5                  | MoCA<24 or<br>MMSE<26      | 0.588 (0.411–0.744) |

*Severity split literature data availability*

|                        | Acute Proportion | Chronic Proportion |
|------------------------|------------------|--------------------|
| Studies                | 6                | 13                 |
| Countries/subnationals | 5                | 11                 |
| GBD world regions      | 5                | 5                  |

We used DisMod MR 2.1, a Bayesian meta-regression tool, to model the six severity levels, with an independent proportion model for each. Reports which grouped mRS scores differently than our mapping (e.g. 0-2) were adjusted in DisMod by estimating the association between these alternate groupings and our preferred mappings. These statistical associations were used to adjust data points to the referent category as necessary. The six models were scaled such that the sum of the proportions for all levels equaled 1.

## Modelling strategy

Three general approaches were employed for all of the components of the stroke modelling process, detailed in the table below.

- Data points were adjusted from nonstandard to standard case definitions using estimates from statistical models generated by DisMod for the acute models. Coefficients for these crosswalks can be found in the tables for fixed effects located below.
- The GBD summary exposure value, which is the relative risk-weighted prevalence of exposure, for ischaemic or haemorrhagic stroke as appropriate and a covariate for country income were used as country-level covariates for all models (4). Coefficients for these covariates can be found in the tables for fixed effects located below.
- Two versions of each stroke model were run, referred to as step 1 and step 2 models. First, we ran the step 1 DisMod-MR models for acute and chronic subtype-specific stroke using only incidence, prevalence, and case fatality data as inputs. We then used the ratio of acute:chronic cause-specific mortality estimated by these models to divide GBD stroke deaths into acute and chronic stroke deaths, using the global average for the proportion of acute:chronic stroke mortality. The acute and chronic models were then run (step 2) using the same incidence, prevalence, and case fatality data as well as the custom cause-specific mortality rates as input data.

### Step 1

- We generated estimates for first-ever acute ischaemic and first-ever acute haemorrhagic stroke using DisMod-MR 2.1 with data collected on stroke incidence and excess mortality. We set value priors of 11 to 13 on remission for all ages to establish a one-month duration for these acute sequelae.
- We then calculated the rate of surviving until 28 days after an acute event for both ischaemic and haemorrhagic stroke using the modelled estimates of excess mortality and incidence.
- These survivor data were then used in the chronic ischaemic and chronic haemorrhagic stroke models as incidence inputs.
- We then ran the chronic stroke models, using the survivor incidence data and excess mortality data. Non-subtype-specific prevalence data were split into ischaemic and haemorrhagic components using the ratio of 28-day survivors from the first stage acute models. We set a value prior of 0 on remission for all ages.
- Implausible or extreme outliers in input data were dropped from these estimation results.
- From these four models, we generated the proportions of deaths due to acute ischaemic, chronic ischaemic, acute haemorrhagic, and chronic haemorrhagic stroke, and split the post-CoDCorrect stroke deaths generated from the GBD mortality estimates into these four parts, by multiplying the location-, sex-, age- and year-specific CSMR results by the

global proportions estimated from the DisMod models. Thus, the mortality rates due to acute ischaemic, chronic ischaemic, acute haemorrhagic, and chronic haemorrhagic stroke are driven by all available data on incidence, prevalence, and excess mortality data for stroke. These CSMR estimates were then uploaded into the non-fatal database and used as inputs for models in Step 2.

#### Step 2

- We re-ran the first-ever acute ischaemic and first-ever acute haemorrhagic models with CSMR as derived from CoDCorrect and epidemiologic data as described above. Twenty-eight-day survivorship was recalculated from these models and uploaded into the chronic ischaemic and chronic haemorrhagic stroke with CSMR models. These chronic models also use CSMR as derived from CoDCorrect and epidemiologic data as described above.
- Implausible or extreme outliers were dropped from these estimation results.

Models were evaluated based on expert opinion, comparison with previous iterations, and model fit.

### Changes in the modelling of stroke for GBD 2016

Several changes were made to the modelling strategy for stroke for the GBD 2016 study. In GBD 2015 and prior, chronic stroke was modelled for both subtypes (ischaemic and haemorrhagic or other) together to estimate the total prevalence of chronic stroke. For the GBD 2016 study, each stroke subtype was modelled independently, resulting in separate acute and chronic stroke models for each subtype. This change was made in order to simplify the stroke modeling process and to ensure that both subtypes were estimated correctly. In the GBD2015 and prior studies, severity splits were based on estimates derived from standard GBD analysis of the U.S. Medical Expenditure Panel Survey. For the GBD2016 study, a review of studies reporting modified Rankin scores following stroke was performed and disability weights were applied using a model of modified Rankin level by age and sex as described above.

- 1) Hatano S. Experience from a multicentre stroke register: a preliminary report. Bull WHO 54, 541-553. 1976.
- 2) GBD 2015 Disease and Injury Incidence and Prevalence Collaborators. Global, regional, and national incidence, prevalence, and years lived with disability for 310 diseases and injuries, 1990-2015: a systematic analysis for the Global Burden of Disease Study 2015. Lancet. 2016 Oct 8;388(10053):1545-1602. doi: 10.1016/S0140-6736(16)31678-6.
- 3) Burstein et al. Estimating distributions of health state severity for the global burden of disease study. Population Health Metrics (2015) 13:31
- 4) GBD 2015 Risk Factors Collaborators. Global, regional, and national comparative risk assessment of 79 behavioural, environmental and occupational, and metabolic risks or clusters of risks, 1990-2015: a systematic analysis for the Global Burden of Disease Study 2015. Lancet. 2016 Oct 8;388(10053):1659-1724. doi: 10.1016/S0140-6736(16)31679-8.

The tables below indicate the covariates used by cause in the estimation process, as well as the beta and exponentiated beta values.

*Step 1:*

| Cause                                | Variable name                                                   | Measure               | beta                  | Exponentiated beta |
|--------------------------------------|-----------------------------------------------------------------|-----------------------|-----------------------|--------------------|
| Chronic ischaemic stroke             | Log-transformed SEV scalar: Isch Stroke                         | Prevalence            | 0.83 (0.75 — 1.03)    | 2.29 (2.12 — 2.80) |
| Chronic ischaemic stroke             | LDI (I\$ per capita)                                            | Excess mortality rate | -0.16 (-0.29 — -0.1)  | 0.85 (0.75 — 0.90) |
| Chronic haemorrhagic stroke          | Log-transformed SEV scalar: Hem Stroke                          | Prevalence            | 0.79 (0.75 — 0.92)    | 2.21 (2.12 — 2.50) |
| Chronic haemorrhagic stroke          | LDI (I\$ per capita)                                            | Excess mortality rate | -0.12 (-0.16 — -0.1)  | 0.89 (0.85 — 0.90) |
| First ever acute haemorrhagic stroke | Hospital data                                                   | Incidence             | 0.54 (0.54 — 0.54)    | 1.71 (1.71 — 1.72) |
| First ever acute haemorrhagic stroke | Any stroke                                                      | Incidence             | 1.27 (1.27 — 1.28)    | 3.57 (3.56 — 3.59) |
| First ever acute haemorrhagic stroke | First-ever acute stroke, ischemic or hemorrhagic                | Incidence             | 0.52 (0.52 — 0.53)    | 1.69 (1.68 — 1.71) |
| First ever acute haemorrhagic stroke | Log-transformed age-standardized SEV scalar: hemorrhagic stroke | Incidence             | 0.77 (0.75 — 0.82)    | 2.17 (2.12 — 2.27) |
| First ever acute haemorrhagic stroke | Any stroke                                                      | Excess mortality rate | -0.48 (-0.66 — -0.32) | 0.62 (0.52 — 0.73) |
| First ever acute haemorrhagic stroke | First-ever acute stroke, ischemic or hemorrhagic                | Excess mortality rate | -0.081 (-0.3 — 0.16)  | 0.62 (0.52 — 0.73) |
| First ever acute ischaemic stroke    | Hospital data                                                   | Incidence             | 0.38 (0.37 — 0.38)    | 1.46 (1.45 — 1.46) |
| First ever acute ischaemic stroke    | Any stroke                                                      | Incidence             | 0.31 (0.29 — 0.33)    | 1.37 (1.34 — 1.39) |
| First ever acute ischaemic stroke    | First-ever acute stroke, ischemic or hemorrhagic                | Incidence             | 0.37 (0.36 — 0.38)    | 1.44 (1.43 — 1.46) |
| First ever acute ischaemic stroke    | Log-transformed age-standardized SEV scalar: ischemic stroke    | Incidence             | 1.16 (1.09 — 1.22)    | 3.21 (2.99 — 3.39) |

Step 2:

| Cause                                          | Variable name                                                | Measure               | beta                  | Exponentiated beta |
|------------------------------------------------|--------------------------------------------------------------|-----------------------|-----------------------|--------------------|
| Chronic ischemic stroke with CSMR              | Log-transformed SEV scalar: Ischaemic stroke                 | Prevalence            | 0.89 (0.75 – 1.19)    | 2.44 (2.13 – 3.27) |
| Chronic ischemic stroke with CSMR              | LDI (I\$ per capita)                                         | Excess mortality rate | -0.49 (-0.5 – -0.46)  | 0.61 (0.61 – 0.63) |
| Chronic haemorrhagic stroke with CSMR          | Log-transformed SEV scalar: Haemorrhagic stroke              | Prevalence            | 0.88 (0.75 – 1.15)    | 2.40 (2.13 – 3.17) |
| Chronic haemorrhagic stroke with CSMR          | LDI (I\$ per capita)                                         | Excess mortality rate | -0.48 (-0.5 – -0.44)  | 0.62 (0.61 – 0.64) |
| First-ever acute haemorrhagic stroke with CSMR | Any stroke                                                   | Incidence             | 1.27 (1.27 – 1.29)    | 3.58 (3.56 – 3.62) |
| First-ever acute haemorrhagic stroke with CSMR | First-ever acute stroke, ischemic or hemorrhagic             | Incidence             | 0.52 (0.52 – 0.54)    | 1.69 (1.68 – 1.71) |
| First-ever acute haemorrhagic stroke with CSMR | Log-transformed SEV scalar: Hem stroke                       | Incidence             | 1.11 (1.01 – 1.20)    | 3.03 (2.74 – 3.33) |
| First-ever acute haemorrhagic stroke with CSMR | Any stroke                                                   | Excess mortality rate | -0.37 (-0.49 – -0.27) | 0.69 (0.62 – 0.77) |
| First-ever acute haemorrhagic stroke with CSMR | First-ever acute stroke, ischemic or hemorrhagic             | Excess mortality rate | 0.023 (-0.2 – 0.23)   | 1.02 (0.82 – 1.25) |
| First-ever acute ischaemic stroke with CSMR    | Any stroke                                                   | Incidence             | 0.32 (0.30 – 0.33)    | 1.38 (1.35 – 1.39) |
| First-ever acute ischaemic stroke with CSMR    | First-ever acute stroke, ischemic or hemorrhagic             | Incidence             | 0.37 (0.36 – 0.38)    | 1.44 (1.43 – 1.46) |
| First-ever acute ischaemic stroke with CSMR    | Log-transformed age-standardized SEV scalar: Ischemic stroke | Incidence             | 1.11 (1.05 – 1.18)    | 3.04 (2.86 – 3.26) |
| First-ever acute ischaemic stroke with CSMR    | Any stroke                                                   | Excess mortality rate | -0.34 (-0.45 – -0.24) | 0.71 (0.64 – 0.79) |
| First-ever acute ischaemic stroke with CSMR    | First-ever acute stroke, ischemic or hemorrhagic             | Excess mortality rate | -0.69 (-0.82 – -0.56) | 0.50 (0.44 – 0.57) |



# Acute Myocarditis

## Flowchart

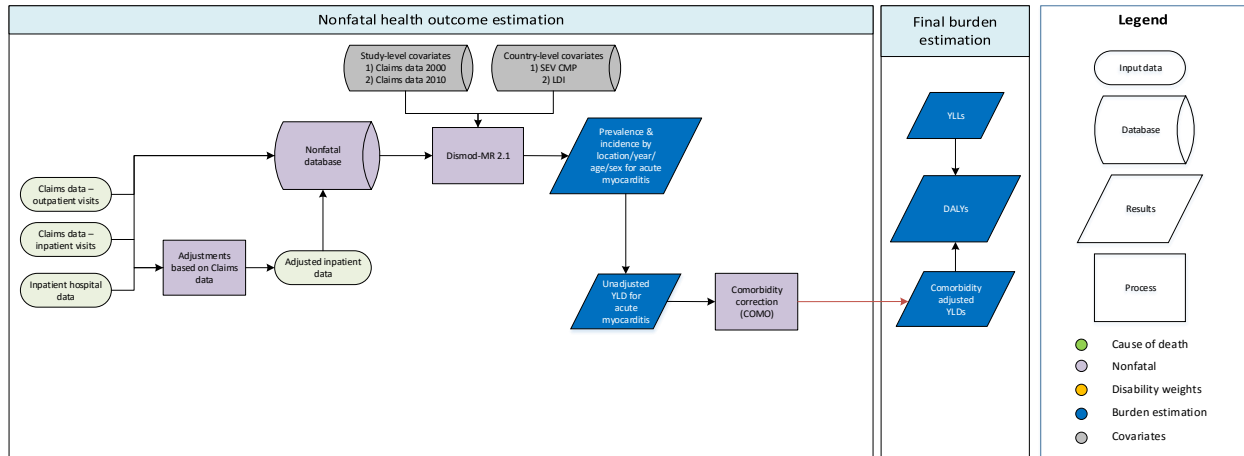

## Input data and methodological summary

### Case definition

Myocarditis refers to a heterogeneous group of diseases with variable clinical and pathological features. Acute myocarditis was defined for GBD as the acute and time-limited symptoms of myocarditis separate from its chronic heart failure-related sequelae. Heart failure due to myocarditis is estimated separately in GBD (see methods for heart failure). Symptoms of acute myocarditis are nonspecific and include a flu-like or gastrointestinal syndrome, followed by anginal-type chest pain, arrhythmias, syncope, or heart failure.

A list of the ICD codes included can be found in Methods Appendix Table 4.

### Input data

#### Model inputs

The preferred data sources for acute myocarditis was hospital admission data and other health facility data identifying cases of acute myocarditis.

A systematic review was performed for GBD 2013 and updated for GBD 2015. A systematic review was not performed for GBD 2016.

The GBD 2015 search terms included: (cardiomyopathy AND epidemiology[MeSH Subheading]) OR (myocarditis AND epidemiology[MeSH Subheading]) OR (cardiomyopathy AND (incidence OR prevalence OR “case fatality”)) OR (myocarditis AND (incidence OR prevalence OR “case fatality”))

- Dates included in search: 1/1/2013 – 3/16/2015
- Number of initial hits: 3,598
- Number of sources included: 0

The GBD 2013 search terms included: (hasabstract[text] AND Humans[Mesh] AND middle age[MeSH]) OR 21) AND ((cardiomyopathy/epidemiology[Mesh] OR cardiomyopathy/mortality[Mesh]) AND (prevalence[Title/Abstract] OR incidence[Title/Abstract]) AND ("2010"[Date - Publication] : "3000"[Date - Publication]) AND (hasabstract[text] AND Humans[Mesh] AND middle age[MeSH]))

We did not include any non-literature-based data, apart from the hospital and claims data described elsewhere. We used inpatient hospital data adjusted for readmission, primary to any diagnosis, and inpatient to outpatient utilization based on correction factors generated using US claims data. We excluded all outpatient data, as they were implausibly low when compared with inpatient data from the same locations and with claims data. Inpatient hospital data points which were more than 5-fold different from the mean value for High-income North America, Central Europe and Western Europe for that age-sex group were excluded.

We included study-level covariates for inpatient hospital data and claims data from 2000 and 2010 to adjust these data points, using as reference the claims data from 2012.

#### *Severity splits and disability weights*

| Severity level    | Lay description                                                                            | DW (95% CI)         |
|-------------------|--------------------------------------------------------------------------------------------|---------------------|
| Acute myocarditis | Has a fever and aches, and feels weak, which causes some difficulty with daily activities. | 0.051 (0.032–0.074) |

## Modelling strategy

For GBD 2016, we estimated myocarditis using a DisMod MR-2.1 Bayesian meta-regression model, setting a minimum of 3 and maximum of 5 as value priors on remission to establish an average duration of three months. We set a value prior of 0 for all ages on excess mortality. We included study-level covariates on incidence for claims data from 2000 and 2010. Country-level covariates used included the cardiomyopathy and myocarditis summary exposure variable (SEV) on incidence and lag distributed income (LDI) per capita (I\$) on excess mortality.

The table below gives the parameters, betas, and exponentiated betas for study-level and country-level covariates used in the model

| Study covariate                                  | Parameter             | beta                    | Exponentiated beta |
|--------------------------------------------------|-----------------------|-------------------------|--------------------|
| LDI (I\$ per capita)                             | Excess mortality rate | -0.3 (-0.49 – -0.11)    | 0.74 (0.61 – 0.90) |
| All MarketScan, year 2000                        | Incidence             | 0.0036 (-0.072 – 0.082) | 1.00 (0.93 – 1.09) |
| All MarketScan, year 2010                        | Incidence             | -0.046 (-0.12 – 0.020)  | 0.96 (0.89 – 1.02) |
| Log-transformed age-standardized SEV scalar: CMP | Incidence             | 0.89 (0.75 – 1.18)      | 2.44 (2.13 – 3.24) |

No substantive changes were made to the modelling approach for GBD 2016.

# Atrial Fibrillation and Flutter

## Flowchart

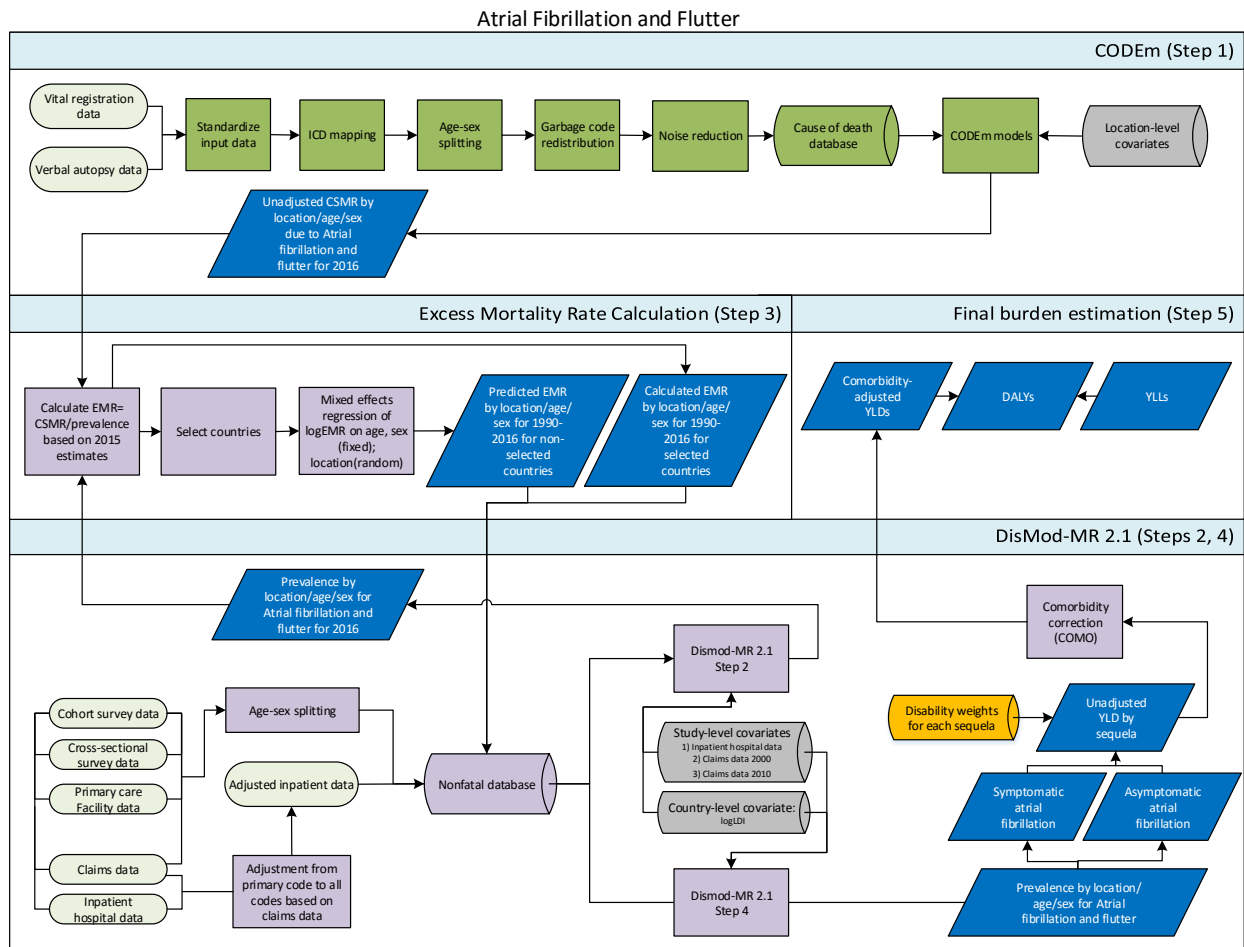

## Input data and methodological summary

### Case definition

Atrial fibrillation was defined as a diagnosis with atrial fibrillation or atrial flutter by ECG findings. ICD codes used for inclusion of hospital and claims data can be found in Methods Appendix Table 4XX.

### Input data

#### Model inputs

We did not perform a systematic review for GBD 2016. A systematic review was performed for GBD 2015 with the following search terms: ("atrial fibrillation" AND epidemiology[MeSH Subheading]) OR ("atrial flutter" AND epidemiology[MeSH Subheading]) OR ("atrial fibrillation" AND (prevalence OR incidence OR

“case fatality”) OR (“atrial flutter” AND (prevalence OR incidence OR “case fatality”)) OR (“heart atrium fibrillation” AND epidemiology[MeSH Subheading]) OR (“heart atrium fibrillation” AND (prevalence OR incidence OR “case fatality”))

The dates of the search were 1/1/2013 – 3/15/2016. There were 5,630 studies returned and, of those, 27 were extracted.

A systematic review was also performed for GBD 2013, with the search terms: (hasabstract[text] AND Humans[Mesh] AND middle age[MeSH]) OR 21 AND ((atrial fibrillation/epidemiology[Mesh] OR atrial fibrillation/mortality[Mesh]) AND (prevalence[Title/Abstract] OR incidence[Title/Abstract]) AND ("2010"[Date - Publication] : "3000"[Date - Publication]) AND (hasabstract[text] AND Humans[Mesh] AND middle age[MeSH]))

The table below shows the data inputs:

|                        | Prevalence | Incidence | Mortality risk |
|------------------------|------------|-----------|----------------|
| Studies                | 71         | 24        | 15             |
| Countries/subnationals | 42         | 17        | 12             |
| GBD world regions      | 8          | 3         | 6              |

Apart from hospital and claims data points on prevalence, no non-literature-based data were included. We included hospital data corrected for readmission, primary to any diagnosis, and inpatient to outpatient utilization ratios using adjustment factors calculated from US claims data. We excluded hospital data in certain locations (e.g. Philippines, China, India) where the data were implausibly low, as well as any year groupings with where the corrected prevalence value exceeded 0.3 for any age group. This threshold was based on the highest reported prevalence in the available literature. We excluded all outpatient administrative data as the values for all locations were implausibly low. We included study-level covariates to adjust the inpatient hospital data and the claims data from 2000 and 2010 within DisMod, using as reference literature data and the claims data from 2012.

#### *Severity splits & disability weights*

Atrial fibrillation is split into symptomatic and asymptomatic based on standard GBD proportion information. The table below includes lay descriptions and disability weights for the severity levels of atrial fibrillation:

| Severity level | Lay description                                                       | DW (95% CI)         |
|----------------|-----------------------------------------------------------------------|---------------------|
| Asymptomatic   | No symptoms                                                           | N/A                 |
| Symptomatic    | Has periods of rapid and irregular heartbeats and occasional fainting | 0.224 (0.151–0.312) |

#### **Modelling strategy**

In order to address changes in coding practices for atrial fibrillation that resulted in an implausible trend of increasing death certificate-based mortality rates, we used a prevalence-based modeling approach that

combined DisMod-MR and CODEm models to generate estimates for atrial fibrillation and flutter. This approach, first used in GBD 2015, allowed us to more generate more accurate estimates, using observed prevalence and incidence rates along with modeled excess mortality rates generated from prevalence and cause-specific mortality estimates.

- In Step 1, we estimated deaths for atrial fibrillation using a standard CODEm approach.
- In Step 2, we estimated prevalence rates in DisMod-MR using data from published reports of cross-sectional and cohort surveys and primary care facility data. We also used claims data covering inpatient and outpatient visits for the United States along with inpatient hospital data from 22 countries. As the inpatient hospital data only included information from the primary code for each visit, prevalence rates for these data were adjusted based on the age- and sex-specific proportions of atrial fibrillation in the primary codes versus secondary codes in the US claims data.
- In Step 3, we calculated the excess mortality rate (EMR) for 2016 (defined as the cause-specific mortality rate (CSMR) estimated from CODEm divided by the prevalence rate from DisMod-MR). We then selected 27 countries based on four conditions: **1) ranking of 4 or 5 stars on the newly developed system for assessing the quality of VR data; 2) prevalence data available from the literature was included in the DisMod-MR 2.1 estimation; 3) prevalence rate  $\geq 0.005$ ; and, 4) CSMR  $\geq 0.00002$ .** These conditions were set to ensure that the VR data were of sufficient quality to generate reasonable estimates, that prevalence estimates for that location were informed directly by representative data for that population, and that cause-specific mortality and prevalence estimates were high enough to ensure reasonable results from the regression. Using information from these countries as input data, we ran a linear mixed-effects regression of logEMR on sex, age, and location. Sex and age were treated as fixed effects for the regression, while location was considered a random effect. We then predicted age- and sex-specific EMR using the results of this regression for all non-selected countries. Countries included in the regression were assigned their directly calculated values. These EMR data points were assigned to the time period 1990–2016 and uploaded into the Nonfatal database.
- In Step 4, we re-ran DisMod-MR including the EMR estimated in Step 3 and using log-transformed lagged distributed income (LDI) as a country-level covariate. Based on information from other regressions, we set the bounds at -1.5 to -0.25. We also included study-level covariates to cross-walk the inpatient hospital and claims data from 2000 and 2010 to the reference data, which included literature data and claims data from 2012. We included a value prior of 0 for remission for all ages. We also set a value prior of 0 for excess mortality for ages 0-30.

The prevalence from the DisMod-MR model in Step 4 was used as the finalized output for upload to COMO and further processing into YLDs and DALYs. Models were evaluated based on expert opinion, comparison with results from previous rounds of GBD, and model fit.

The tables below includes the study covariates, parameters, betas, and exponentiated betas.

#### DisMod Covariates – Step 2

| Study covariate           | Parameter  | Beta                      | Exponentiated beta |
|---------------------------|------------|---------------------------|--------------------|
| Hospital data             | Prevalence | -0.000086 (-0.19 – 0.097) | 1.0 (0.82 – 1.10)  |
| All MarketScan, year 2000 | Prevalence | -0.47 (-0.5 – -0.44)      | 0.63 (0.61 – 0.64) |

|                                                    |                       |                          |                    |
|----------------------------------------------------|-----------------------|--------------------------|--------------------|
| All MarketScan, year 2010                          | Prevalence            | -0.003 (-0.024 – -0.014) | 1.0 (0.98 – 1.01)  |
| Log-transformed age-standardized SEV scalar: A Fib | Prevalence            | 0.75 (0.75 – 0.75)       | 2.12 (2.12 – 2.12) |
| LDI (I\$ per capita)                               | Excess mortality rate | -0.48 (-0.5 – -0.43)     | 0.62 (0.61 – 0.65) |

#### DisMod Covariates – Step 4

| Study covariate                                    | Parameter             | Beta                      | Exponentiated beta |
|----------------------------------------------------|-----------------------|---------------------------|--------------------|
| All MarketScan, year 2000                          | Prevalence            | -0.46 (-0.49 – -0.43)     | 0.63 (0.62 – 0.65) |
| All MarketScan, year 2010                          | Prevalence            | -0.0021 (-0.025 – -0.021) | 1.0 (0.98 – 1.02)  |
| Log-transformed age-standardized SEV scalar: A Fib | Prevalence            | 0.75 (0.75 – 0.75)        | 2.12 (2.12 – 2.12) |
| LDI (I\$ per capita)                               | Excess mortality rate | -0.1 (-0.1 – -0.1)        | 0.9 (0.9 – 0.9)    |

No substantive changes were made to the modelling strategy for GBD 2016.

# Peripheral Arterial Disease

## Flowchart

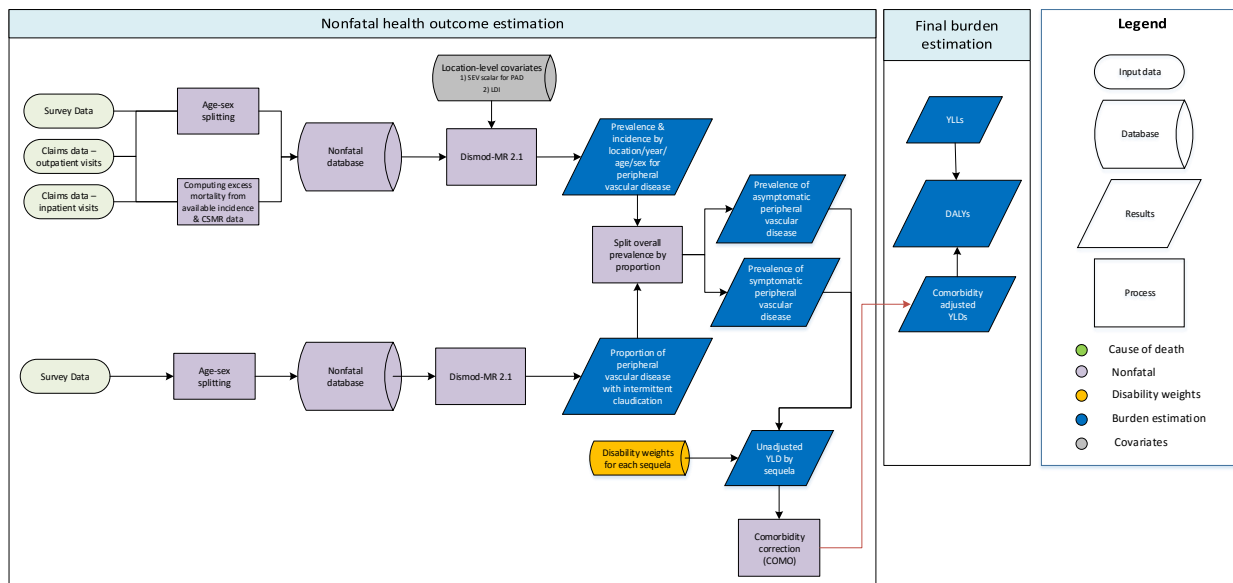

## Input data and methodological appendix

### Case definition

For GBD 2016, peripheral arterial disease was defined as having an ankle-brachial index (ABI) <0.9. Intermittent claudication was defined clinically.

Specific ICD codes for claims data included can be found in Methods Appendix Table 4.

### Input data

#### Model inputs

We did not perform a systematic review for GBD 2016.

A systematic review was performed for peripheral arterial disease and intermittent claudication for GBD 2015. The search terms were: ('peripheral vascular disease'[TIAB] AND 'epidemiology'[Subheading]) OR ('peripheral arterial disease'[TIAB] AND 'epidemiology'[Subheading]) OR ('peripheral artery disease'[TIAB] AND 'epidemiology'[Subheading]) OR ('intermittent claudication'[TIAB] AND 'epidemiology'[Subheading]) OR ('ankle-brachial index'[TIAB] AND 'epidemiology'[Subheading]) OR ('ankle brachial index'[TIAB] AND 'epidemiology'[Subheading]) OR ('peripheral artery occlusive disease'[TIAB] AND 'epidemiology'[Subheading]) OR ('peripheral obliterative arteriopathy'[TIAB] AND 'epidemiology'[Subheading]) OR ('peripheral vascular disease'[TIAB] AND 'prevalence'[MeSH Terms]) OR ('peripheral vascular disease'[TIAB] AND 'incidence'[MeSH Terms]) OR ('peripheral vascular

disease'[TIAB] AND 'case fatality'[All Fields]) OR ('symptomatic claudication'[TIAB] AND (proportion[All Fields] OR percent[All Fields]))

The search was conducted from 1/1/13 to 3/16/2015. 1,658 results were returned, of which six were extracted.

A systematic review was also performed for peripheral arterial disease and intermittent claudication for GBD 2013. Search terms can be provided upon request.

The table below shows the number of literature studies included in GBD 2015, as well as the number of countries or subnational units and GBD world regions represented.

Peripheral arterial disease

|                        | Prevalence | Incidence | Mortality risk |
|------------------------|------------|-----------|----------------|
| Studies                | 16         | 2         | 1              |
| Countries/subnationals | 11         | 2         | 1              |
| GBD world regions      | 7          | 2         | 1              |

Proportion with intermittent claudication

|                        | Proportion |
|------------------------|------------|
| Studies                | 9          |
| Countries/subnationals | 4          |
| GBD world regions      | 3          |

Apart from the claims data, we did not include any non-literature-based data types. We did not use inpatient hospital data, as peripheral arterial disease is expected to be rare in inpatient data, but common in outpatient data as it is a condition usually managed on an outpatient basis, except for specific surgical interventions. This discrepancy leads to implausible correction factors based on inpatient/outpatient information from claims data (~150X); thus adjusted data cannot be used. Including uncorrected data in the model is likely to lead to incorrect estimates as hospitalization and procedure rates are likely to vary between locations based on access to and patterns of care.

We corrected US claims data outside of DisMod, using as reference literature reports of prevalence. Using as a model the adjustment factors developed to translate tobacco consumption prevalence to tobacco consumption frequency, we matched administrative claims data to population-based literature data based on age group, sex, and super region (1). For the adjustment factor, we developed the following generalized additive model on matched data

$$\ln(\mu_{ref,i}) = \beta_0 + \beta_1 \ln(\mu_{b,i}) + s(age_i) + \varepsilon_i$$

Where  $i$  represents a given matched observation,  $age$  signifies the data point's age group,  $s(x)$  represents a penalized spline where the smoothing parameter is chosen through cross validation and  $\mu_{ref}$  and  $\mu_b$  denote the mean of the data point from literature and the mean of the claims data point, respectively. Predictions from the model were then taken as the adjusted data points. The standard error of each corrected data point was adjusted to account for the uncertainty due to the correction.

Outpatient data were not included as the rates were implausibly low for all locations.



### Severity splits and disability weights

We used the proportion of intermittent claudication to split the overall prevalence of peripheral arterial disease into symptomatic and asymptomatic peripheral vascular disease. The table below illustrates these values:

| Severity level | Lay description                                                                                        | DW (95% CI)         |
|----------------|--------------------------------------------------------------------------------------------------------|---------------------|
| Asymptomatic   | No symptoms                                                                                            | No DW assigned      |
| Symptomatic    | Has cramping pains in the legs after walking a medium distance. The pain goes away after a short rest. | 0.014 (0.007–0.025) |

### Modelling strategy

For GBD 2016, we used DisMod MR 2.1 to model the overall prevalence of peripheral arterial disease using prevalence data from literature studies and claims data. Claims data were adjusted outside of DisMod using the ratio of prevalence reported in literature studies to the prevalence figures in the claims data by age and sex. We also included the log-transformed, age-standardized SEV scalar for PAD and log-transformed LDI as fixed-effect, country-level covariates. We set value priors of 0 for incidence from ages 0 to 30. We also set a value prior of 0 for remission for all ages. Finally, we set a value prior of a maximum value of 0.25 on excess mortality for all ages.

The table below illustrates the study covariates, parameters, beta, and exponentiated beta values for the overall peripheral vascular disease model.

| Covariate                                        | Parameter             | Beta                 | Exponentiated beta |
|--------------------------------------------------|-----------------------|----------------------|--------------------|
| Log-transformed age-standardized SEV scalar: PVD | Prevalence            | 1.22 (1.17 – 1.25)   | 3.40 (3.21 – 3.49) |
| LDI (I\$ per capita)                             | Excess mortality rate | -0.30 (-0.50 – -0.1) | 0.74 (0.61 – 0.90) |

We used DisMod MR-2.1 to model the proportion of peripheral vascular disease with intermittent claudication. We set a value prior of 0 for proportion for ages 0 to 40.

| Covariate                           | Parameter  | Beta                      | Exponentiated beta |
|-------------------------------------|------------|---------------------------|--------------------|
| Healthcare access and quality index | Proportion | -0.013 (-0.04 – -0.00034) | 0.99 (0.96 – 1.00) |

To obtain final estimates for the sequelae of interest, we multiplied the prevalence model by the proportion model at the draw level to generate the prevalence of symptomatic and asymptomatic peripheral vascular disease.

Models were evaluated based on expert review, comparisons with estimates from prior rounds of GBD, and assessing model fit.

We corrected an error in the mapping of ICD-coded data for peripheral arterial disease – in previous iterations of GBD, unspecified atherosclerosis was assigned to peripheral arterial disease. As this code likely represents a mix of central and peripheral atherosclerosis, we excluded these data to ensure

specificity of diagnosis. Other this correction, there have been no substantive changes from GBD 2015 in terms of modelling strategy for peripheral arterial disease.

1. Reitsma, Marissa B., et al. "Smoking prevalence and attributable disease burden in 195 countries and territories, 1990–2015: a systematic analysis from the Global Burden of Disease Study 2015." *The Lancet*.

# Acute Endocarditis

## Flowchart

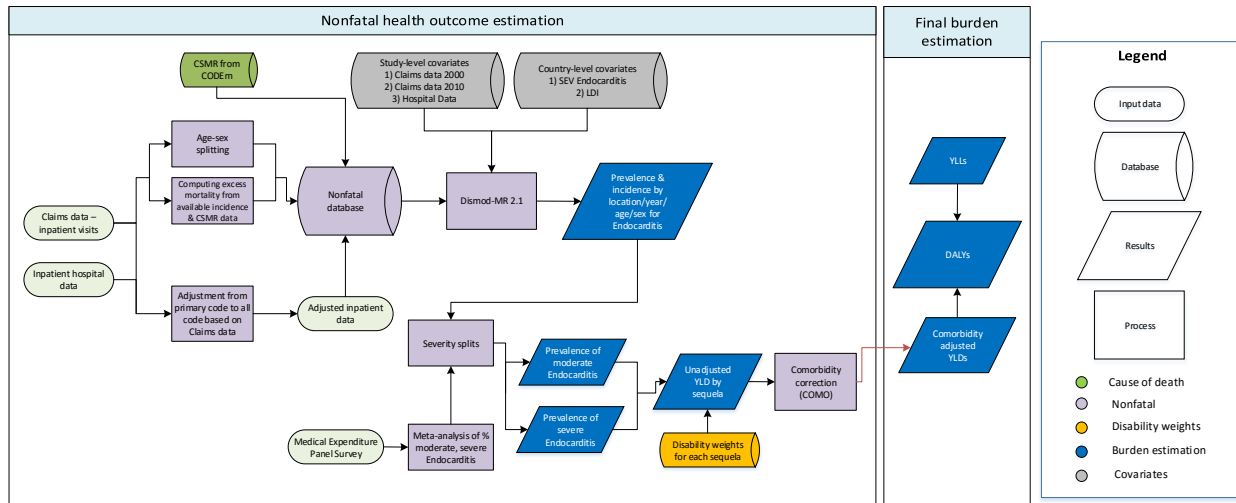

## Input data and methodological appendix

### Case definition

Our case definition for acute endocarditis was a clinical diagnosis of infective endocarditis. The ICD codes included can be found in Methods Appendix Table 4.

### Input data

#### Model inputs

A systematic review was performed for GBD 2013 and updated for GBD 2015. We did not perform a systematic review for GBD 2016. The following search terms were used: (('endocarditis'[MeSH Terms] OR 'endocarditis'[All Fields]) AND 'epidemiology'[Subheading]) OR (('endocarditis'[MeSH Terms] OR 'endocarditis'[All Fields]) AND (('epidemiology'[Subheading] OR 'epidemiology'[All Fields] OR 'incidence'[All Fields] OR 'incidence'[MeSH Terms]) OR ('epidemiology'[Subheading] OR 'epidemiology'[All Fields] OR 'prevalence'[All Fields] OR 'prevalence'[MeSH Terms]) OR 'case fatality'[All Fields])) OR (('endocardium'[MeSH Terms] OR 'endocardium'[All Fields]) AND inflammation[TIAB] AND 'epidemiology'[Subheading]) OR (('endocardium'[MeSH Terms] OR 'endocardium'[All Fields]) AND inflammation[TIAB] AND (('epidemiology'[Subheading] OR 'epidemiology'[All Fields] OR 'incidence'[All Fields] OR 'incidence'[MeSH Terms]) OR ('epidemiology'[Subheading] OR 'epidemiology'[All Fields] OR 'prevalence'[All Fields] OR 'prevalence'[MeSH Terms]) OR 'case fatality'[All Fields]))

- Dates included in search: 1/1/2013 – 3/16/2015
- Number of initial hits: 1,246
- Number of sources included: 6

The table below shows the number of literature studies included in GBD 2016, as well as the number of countries or subnational units and GBD world regions represented.

|                        | Prevalence | Incidence | Mortality risk |
|------------------------|------------|-----------|----------------|
| Studies                | 0          | 14        | 1              |
| Countries/subnationals | 0          | 7         | 1              |
| GBD world regions      | 0          | 3         | 1              |

We did not include any non-literature-based data types, apart from the hospital and claims data described elsewhere. We excluded all outpatient data, as they were implausibly low when compared with inpatient data from the same locations and claims data. We used hospital data corrected for readmission and primary to any diagnosis based on the correction factors generated using US claims data. We excluded any inpatient hospital data points which were more than 5-fold different from the mean value for High-income North America, Central Europe and Western Europe for that age-sex group.

We included study-level covariates for inpatient hospital data and claims data from 2000 and 2010 to adjust these data points, using as reference the data obtained from literature and claims data from 2012.

#### *Severity split inputs*

We used the standard GBD approach, which utilizes MEPS data to split overall estimates of endocarditis into moderate and severe categories. The table below includes the severity level, lay descriptions, and DWs associated with acute endocarditis.

| Severity level | Lay description                                                                                      | DW (95% CI)         |
|----------------|------------------------------------------------------------------------------------------------------|---------------------|
| Moderate       | Has a fever and aches, and feels weak, which causes some difficulty with daily activities.           | 0.051 (0.032–0.074) |
| Severe         | Has a high fever and pain, and feels very weak, which causes great difficulty with daily activities. | 0.133 (0.088–0.19)  |

#### **Modelling strategy**

For GBD 2016, we estimated endocarditis using a DisMod MR-2.1 Bayesian meta-regression model, setting a minimum of 11 and maximum of 13 as value priors on remission to establish an average duration of one month. We included study-level covariates on incidence for inpatient hospital data and claims data from 2000 and 2010. Country-level covariates used included the endocarditis summary exposure variable (SEV) on incidence and lag distributed income (LDI) per capita (I\$) on excess mortality.

We evaluated models by comparing model fits with the data and with results from previous GBD estimation cycles. In prior iterations of GBD, we used modelled data for remission; based on information from the literature and expert review, we have revised this to use an average duration of one month for all locations.

The table below gives the parameters, betas, and exponentiated betas for study-level and country-level covariates used in the model

| Covariate                                                 | Parameter             | Beta                  | Exponentiated beta |
|-----------------------------------------------------------|-----------------------|-----------------------|--------------------|
| Hospital data                                             | Incidence             | 0.70 (0.66 – 0.72)    | 2.01 (1.93 – 2.06) |
| Inpatient-only Marketscan, year 2000                      | Incidence             | -0.34 (-0.39 – -0.29) | 0.71 (0.68 – 0.75) |
| Inpatient-only Marketscan, year 2010                      | Incidence             | -0.18 (-0.22 – -0.13) | 0.84 (0.80 – 0.88) |
| LDI (I\$per capita)                                       | Excess mortality rate | -0.14 (-0.16 – -0.13) | 0.87 (0.85 – 0.88) |
| Log-transformed age-standardized SEV scalar: endocarditis | Incidence             | 0.89 (0.75 – 0.86)    | 2.20 (2.12 – 2.37) |

No other significant changes were made to the modelling strategy from GBD 2015.

# Other cardiovascular disease

## Flowchart

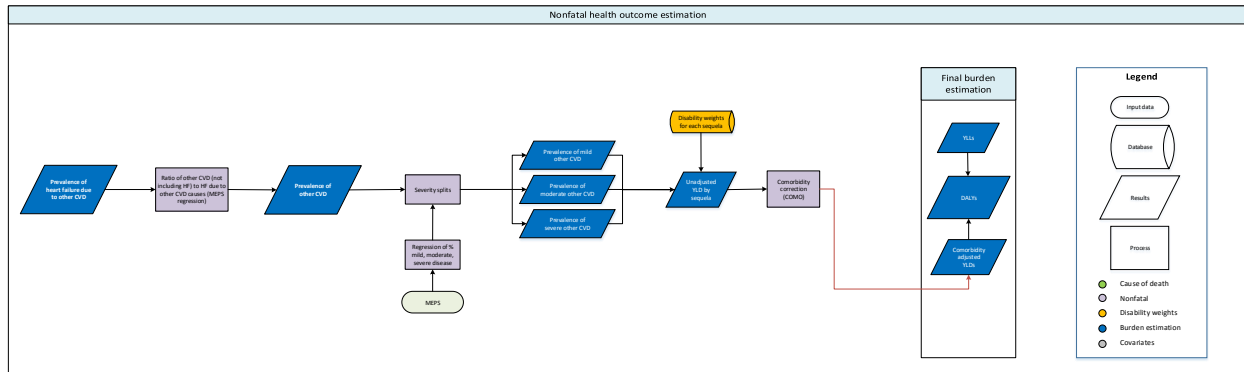

## Case definition

Other cardiovascular disease is a residual category; conditions included in this cause are:

Other diseases of pulmonary vessels, Acute pericarditis, Other diseases of pericardium, Pericarditis in diseases classified elsewhere, Nonrheumatic mitral valve disorders, Nonrheumatic aortic valve disorders, Nonrheumatic tricuspid valve disorders, Nonrheumatic pulmonary valve disorders, Paroxysmal tachycardia, Cardiac septal defect, acquired, Rupture of chordae tendineae, not elsewhere classified, Rupture of papillary muscle, not elsewhere classified, Intracardiac thrombosis, not elsewhere classified, Cerebral amyloid angiopathy, Other aneurysm, Other disorders of arteries and arterioles, Diseases of capillaries, Disorders of arteries, arterioles and capillaries in diseases classified elsewhere, Phlebitis and thrombophlebitis, Portal vein thrombosis, Other venous embolism and thrombosis, Varicose veins of lower extremities, Varicose veins of other sites, Other disorders of veins, Nonspecific lymphadenitis, Other noninfective disorders of lymphatic vessels and lymph nodes, Other disorders of circulatory system in diseases classified elsewhere

## Input data

As this is a residual category, we used data from the Medical Expenditure Panel Survey and modeled estimates from heart failure due to other cardiovascular disease to estimate prevalence of other cardiovascular disease.

### Severity split inputs

The table below includes lay descriptions and disability weights for the severity levels of other cardiovascular disease for GBD 2016.

| Severity level | Lay description | DW (95% CI) |
|----------------|-----------------|-------------|
|----------------|-----------------|-------------|

|          |                                                                                                                                                                                                                           |                     |
|----------|---------------------------------------------------------------------------------------------------------------------------------------------------------------------------------------------------------------------------|---------------------|
| Mild     | Is short of breath and easily tires with moderate physical activity, such as walking uphill or more than a quarter-mile on level ground. The person feels comfortable at rest or during activities requiring less effort. | 0.041 (0.026–0.062) |
| Moderate | Is short of breath and easily tires with minimal physical activity, such as walking only a short distance. The person feels comfortable at rest but avoids moderate activity.                                             | 0.072 (0.047–0.103) |
| Severe   | Is short of breath and feels tired when at rest. The person avoids any physical activity, for fear of worsening the breathing problems.                                                                                   | 0.179 (0.122–0.251) |

## Modelling strategy

To obtain prevalence estimates of other cardiovascular disease, we used MEPS data combined with 2005 USA prevalence estimates of heart failure due to other CVD causes to get an estimate of the other cardiovascular disease to HF due to other CVD ratio. We then applied this ratio to the estimates for heart failure due to other CVD causes for all locations to generate prevalence estimates of other cardiovascular disease.

No significant changes were made to the modelling strategy for GBD 2016.

# Hemoglobinopathies and Hemolytic Anaemias

*Sickle cell disorders, thalassemias, glucose-6-phosphate dehydrogenase (G6PD) deficiency, sickle cell trait, thalassemia trait, hemizygous G6PD deficiency, other hemoglobinopathies and hemolytic anaemias*

## Flowchart

**Hemoglobinopathies and hemolytic anaemias:** Sickle cell disorders, Thalassemias, Glucose-6-phosphate dehydrogenase (G6PD) deficiency, Sickle cell trait, Thalassemia trait, Hemizygous G6PD deficiency, Other hemoglobinopathies and hemolytic anaemias

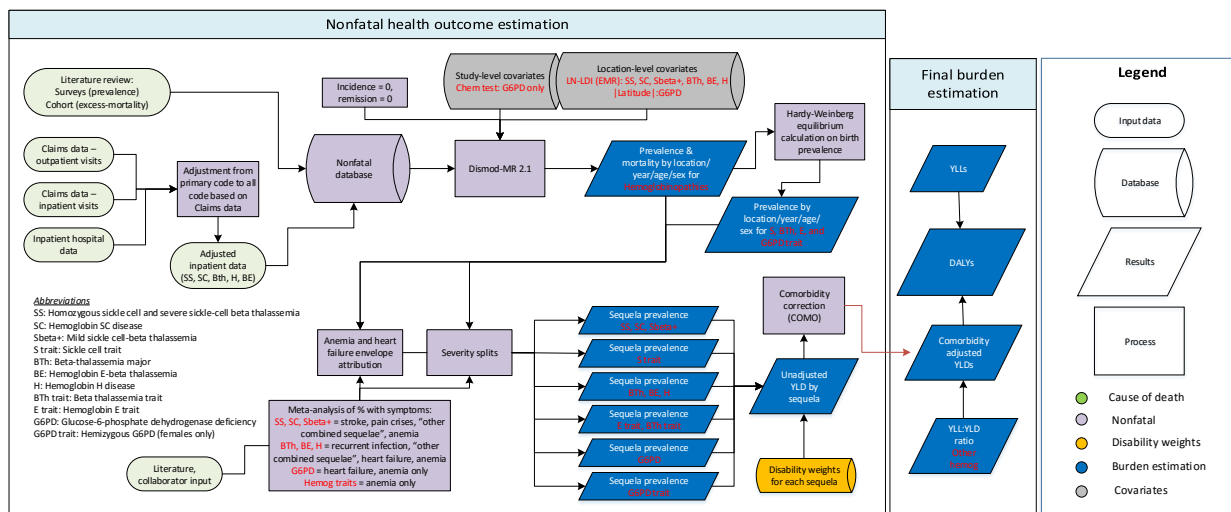

## Input data and methodological summary

### Case definition

Hemoglobinopathies and hemolytic anaemias span four GBD causes: thalassemias, sickle cell disorders, glucose-6-phosphate dehydrogenase (G6PD) deficiency, and other hemoglobinopathies. ICD-9 and ICD-10 codes for each are contained in Table 1. Within each category, several unique combinations of genetic mutations lead to distinct phenotypes with different natural history, which has led us to estimate several distinct subtypes of thalassemias and sickle cell disorders. The three thalassemia models included 1) beta-thalassemia major, 2) hemoglobin E/beta-thalassemia, and 3) hemoglobin H disease. Sickle cell models included 1) homozygous sickle cell and severe sickle cell/beta-thalassemia, 2) hemoglobin SC disease, and 3) "mild" sickle cell-beta thalassemia. We also estimated the burden of glucose-6-phosphate dehydrogenase (G6PD) deficiency. Finally, we estimated prevalence and YLD due to other hemoglobinopathies and hemolytic anaemias assuming the YLD-to-YLL ratio for each age, sex, location, and year was similar to that of the aggregate of sickle cell, thalassemias, and G6PD deficiency. This approach was used in multiple causes across GBD 2015.



**TABLE 1. International classification of diseases codes for hemoglobinopathies and hemolytic anaemias in GBD 2015 cause of death analysis**

| Condition                                      | ICD-10 code | ICD-9 code                                                |
|------------------------------------------------|-------------|-----------------------------------------------------------|
| Total                                          | D55-D59     | 282.0-282.1, 282.7-285.8, 282.2-282.3, 282.5-282.6, 282.4 |
| Thalassemias                                   | D56         | 282.4                                                     |
| Sickle cell disorders                          | D57         | 282.5-282.6                                               |
| G6PD deficiency                                | D55         | 282.2-282.3                                               |
| Other hemoglobinopathies and hemolytic anemias | D58-D64.8   | 282.0-282.1, 282.7-285.8                                  |

## Input data

### *Model inputs*

Systematic literature reviews were completed for GBD 2010 and GBD 2013. These were updated on May 1, 2015, using the following search strings:

(thalassemias[Title/Abstract] AND (prevalence[Title/Abstract] OR survival[Title/Abstract] OR mortality[Title/Abstract]) AND ("2008"[PDAT] : "2013"[PDAT])) AND "humans"[MeSH Terms]

(sickle cell[Title/Abstract] AND (mortality[Title/Abstract] OR survival[Title/Abstract] OR prevalence[Title/Abstract]) AND ("2008"[PDAT] : "2013"[PDAT])) AND "humans"[MeSH Terms]

(G6PD[Title/Abstract] OR G6PD deficiency[Title/Abstract] OR glucose-6 phosphate dehydrogenase[Title/Abstract] OR glucose-6-phosphate dehydrogenase deficiency[Title/Abstract] AND (survival[Title/Abstract] OR mortality[Title/Abstract]) AND ("2008"[PDAT] : "2013"[PDAT])) AND "humans"[MeSH Terms]

Of note, upon the recommendation from multiple GBD collaborators, we identified and re-extracted all primary data that had been used in GBD 2013. In some situations, this process identified cases of sickle cell or thalassemia that had been assigned to incorrect subtypes, but mostly the data were correct and verified. We excluded any data where the results presented in a study were themselves the result of modelling exercises. The most significant change as a result of re-extraction was when we identified that much of the literature data used in GBD 2013 from females with G6PD deficiency actually did not correspond to our case definition of homozygous disease, but rather included combined case counts for homozygotes and hemizygotes. We only included homozygous disease in our datasets for GBD 2015, which has led to much lower estimates of G6PD deficiency in females.

We extracted prevalence data from population-level and community surveys as well as with-condition mortality and excess-mortality data from cohort studies. Age-specific survival proportions were converted to with-condition mortality rates as needed. We also included data from hospital and claims data for a subset of hemoglobinopathy models, including beta-thalassemia major, hemoglobin E/beta-thalassemia, homozygous sickle cell and severe sickle cell/beta-thalassemia, hemoglobin SC disease, and mild sickle cell/beta-thalassemia. The extraction and processing of hospital and claims data is described separately. Composition of final datasets are shown below for each of the different hemoglobinopathies and hemolytic anaemias models.

**Data availability**

Homozygous sickle cell and severe sickle cell/beta-thalassemia (2097):

|                        | <b>Prevalence</b> | <b>Mortality risk</b> |
|------------------------|-------------------|-----------------------|
| Studies                | 110               | 25                    |
| Countries/subnationals | 83/44             | 11/15                 |
| GBD world regions      | 13                | 8                     |

Hemoglobin SC disease (2100):

|                        | <b>Prevalence</b> | <b>Mortality risk</b> |
|------------------------|-------------------|-----------------------|
| Studies                | 63                | 12                    |
| Countries/subnationals | 42/21             | 4/7                   |
| GBD world regions      | 12                | 4                     |

Mild sickle cell/beta-thalassemia (2103):

|                        | <b>Prevalence</b> | <b>Mortality risk</b> |
|------------------------|-------------------|-----------------------|
| Studies                | 20                | 9                     |
| Countries/subnationals | 57/7              | 22/9                  |
| GBD world regions      | 13                | 3                     |

Beta-thalassemia major (2085):

|                        | <b>Prevalence</b> | <b>Mortality risk</b> |
|------------------------|-------------------|-----------------------|
| Studies                | 27                | 6                     |
| Countries/subnationals | 86/33             | 6/1                   |
| GBD world regions      | 18                | 3                     |

Hemoglobin E/beta-thalassemia (2087):

|                        | <b>Prevalence</b> | <b>Mortality risk</b> |
|------------------------|-------------------|-----------------------|
| Studies                | 7                 | 1                     |
| Countries/subnationals | 23/20             | 1/1                   |
| GBD world regions      | 3                 | 1                     |

Hemoglobin H disease (2089):

|                        | <b>Prevalence</b> |
|------------------------|-------------------|
| Studies                | 11                |
| Countries/subnationals | 19/23             |
| GBD world regions      | 9                 |

G6PD deficiency (2112):

|  | <b>Prevalence</b> |
|--|-------------------|
|--|-------------------|

|                        |       |
|------------------------|-------|
| Studies                | 278   |
| Countries/subnationals | 89/39 |
| GBD world regions      | 18    |

## Modelling strategy

Besides data re-extraction and addition of hospital and claims data, we have made no substantive changes to the estimation strategy since 2013. We estimated the nonfatal burden of hemoglobinopathies in three parts.

First, we used the datasets described above to estimate prevalence for each age-sex-location-year in the GBD 2015 location hierarchy using DisMod-MR 2.1. For mild sickle cell/beta-thalassemia models, study-level covariates were used to identify and crosswalk those data from Marketscan in the year 2000, which were systematically lower than later years, to the years 2010 and 2012. The magnitude of prevalence in later years of claims data for this model, and in all years for other models, was similar to that of literature data from the same locations, so they were considered equivalent and no additional crosswalks were performed. In all sickle cell models and beta-thalassemia major, the natural log of lag-distributed income per capita (LN-LDI) was used as a sole country covariate on excess mortality, meant to reflect the profound impact that health system financial resources can have on survival from these conditions. For G6PD deficiency, data where diagnosis was made only on the basis of chemical or reagent testing was crosswalked to the reference definition of genetic G6PD deficiency; absolute value of latitude was the sole country covariate for this model.

Second, we calculated prevalence of hemoglobinopathy traits (sickle cell trait, hemoglobin E trait, hemoglobin beta trait, G6PD trait) by back-calculating from birth prevalence estimates from corresponding DisMod-MR 2.1 models, assuming Hardy-Weinberg equilibrium, and no excess mortality. Third, age-specific prevalence for all subtypes of hemoglobinopathies were paired with estimated sequelae distributions from a series of cohort studies and clinical data in GBD 2010 and GBD 2013. This included consideration of the burden of anaemia associated with homozygous and heterozygous persons and ensuring the estimates of hemoglobinopathy-induced anaemia were internally consistent with overall estimates for each condition, including prevention of double counting. The anaemia estimation process is described separately.

Third, and finally, we found the ratio of YLD to YLL ratio for all hemoglobinopathies and then applied it to YLLs estimated for other hemoglobinopathies and hemolytic anaemias in our cause-specific mortality analysis. Quantitative crosswalk results for each model are shown below.

### Covariate, parameter, beta, and exponentiated beta values

Homozygous sickle cell and severe sickle cell/beta-thalassemia (2097):

| Study-level covariate | Parameter             | Location level | beta  | Exponentiated beta    |
|-----------------------|-----------------------|----------------|-------|-----------------------|
| LDI (I\$ per capita)  | Excess mortality rate | Global         | -0.14 | 0.87<br>(0.86 - 0.88) |

Hemoglobin SC disease (2100):

| Study-level covariate | Parameter             | Location level | beta  | Exponentiated beta    |
|-----------------------|-----------------------|----------------|-------|-----------------------|
| LDI (I\$ per capita)  | Excess mortality rate | Global         | -0.03 | 0.97<br>(0.95 – 1.00) |

Mild sickle cell/beta-thalassemia (2103):

| Study-level covariate     | Parameter             | Location level | beta  | Exponentiated beta     |
|---------------------------|-----------------------|----------------|-------|------------------------|
| LDI (I\$ per capita)      | Excess mortality rate | Global         | -0.19 | 0.83<br>(0.74 - 0.98)  |
| All MarketScan, year 2000 | Prevalence            | Global         | -0.48 | .6199<br>(0.54 - 0.71) |

Beta-thalassemia major (2085):

| Study-level covariate | Parameter             | Location level | beta  | Exponentiated beta    |
|-----------------------|-----------------------|----------------|-------|-----------------------|
| LDI (I\$ per capita)  | Excess mortality rate | Global         | -0.58 | 0.56<br>(0.55 - 0.58) |

Hemoglobin E/beta-thalassemia (2087):

| Study-level covariate | Parameter  | Location level | beta                  | Exponentiated beta    |
|-----------------------|------------|----------------|-----------------------|-----------------------|
| Year                  | Prevalence | Global         | 0.02<br>(0.00 - 0.02) | 1.02<br>(1.00 - 1.02) |

Hemoglobin H disease (2089):

| Study-level covariate | Parameter  | Location level | beta  | Exponentiated beta    |
|-----------------------|------------|----------------|-------|-----------------------|
| Year                  | Prevalence | Global         | -0.01 | 0.99<br>(0.98 - 1.02) |

G6PD deficiency (2112):

| Study-level covariate              | Parameter  | Location level | beta  | Exponentiated beta    |
|------------------------------------|------------|----------------|-------|-----------------------|
| Absolute value of average latitude | Prevalence | Super region   | -0.01 | 0.99<br>(0.98 - 1.00) |

|                                                       |            |              |       |                       |
|-------------------------------------------------------|------------|--------------|-------|-----------------------|
| Diagnostic modality based on chemical/reagent testing | Prevalence | Super region | 0.322 | 1.38<br>(1.16 - 1.69) |
| Year                                                  | Prevalence | Super region | -0.01 | 0.99<br>(0.98 - 0.99) |

### **Sequelae**

With the exception of anaemia, only homozygous individuals were considered to experience disability. Estimated sequelae of thalassemias included anaemia (described separately), heart failure (described separately), and periodic severe infection. Another series of common, but not universal, sequelae also occur in those with thalassemias, including splenomegaly, skeletal deformity, delayed growth/puberty, diabetes, hypothyroidism, and leg ulcers. Given sparse data on the occurrence of these sequelae, they were approximated with a health state named “other combined sequelae of thalassemia,” for which we used the disability weight corresponding to a health state of “generic uncomplicated disease, anxiety about diagnosis and daily medication” which, of note, was also used to approximate the disability for those with cancer in remission. For sickle cell disorders, we similarly estimated YLDs for anaemia (described separately), stroke, and pain crises separately and approximated the myriad additional complications of sickle cell disease with the health state “other combined sequelae of sickle cell disease.” The only sequelae estimated for G6PD deficiency were anaemia (described separately) and heart failure (described separately). Notably, however, G6PD deficiency is considered to be asymptomatic for a vast majority of those with the condition, with only a very small subset of around 1 in 1,000,000 having chronic hemolysis (Class I disease) and approximately 1% having periodic hemolytic episodes (Class II disease) with exposure to environmental, pharmaceutical, or food products. Females heterozygous for G6PD deficiency exhibit chimerism, as one X chromosome becomes dominant in each of the red blood cells, so we estimated half as many heterozygous females will be symptomatic as homozygous females.

### **Uncertainty and model selection**

For all hemoglobinopathies estimates, uncertainty bounds include uncertainty due to input data, crosswalks from non-reference definitions in study covariates above, uncertainty in numerical solutions (posteriors) of each DisMod-MR 2.1 model, and proportion of all persons with each type of symptom.

In consultation with GBD researchers and collaborators, final models were selected on a combination of qualitative and quantitative goodness of fit to input data, plausibility of geographic and temporal trends, consistency of age pattern, and, when available, comparison with other published studies on hemoglobinopathy epidemiology. Directionality, magnitude, and plausibility of study-level and country-level covariates was also considered in the process of model development. Of note, due to the nature of statistical modelling, final results do not always cover the values reported in input data.

No other significant changes were made to the GBD 2015 modelling strategy.

# Chronic Obstructive Pulmonary Disease (COPD)

## Flowchart

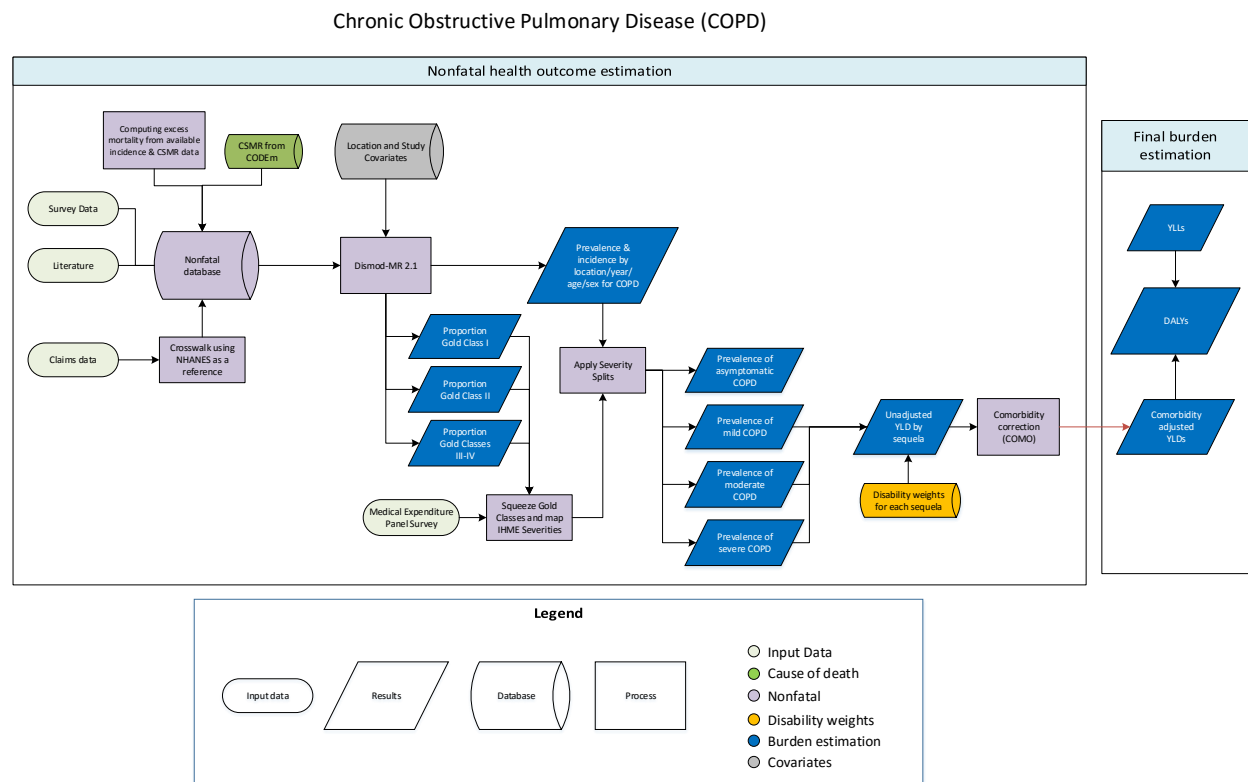

## Input data and methodological summary

### Case definition

COPD is defined as in the Global Initiative for Chronic Obstructive Lung Disease (GOLD) classification: a measurement of  $<0.7$  FEV<sub>1</sub>/FVC (one second of forceful exhalation/total forced expiration) on spirometry after bronchodilation. It should be noted that this is the same reference definition as was used for GBD 2015, but it is different from GBD 2013 where the “Lower Limit of Normal (LLN),” ie, relative to an age- and sex-specific norm for the FEV<sub>1</sub>/FVC ratio, was the reference. We made this decision because the severity grading of COPD follows the GOLD Class definition rather than the LLN concept. The definitions of the severity classes in the GOLD classification are provided below.

| GOLD CLASS   | FEV <sub>1</sub> Score |
|--------------|------------------------|
| I: Mild      | $\geq 80\%$ of normal  |
| II: Moderate | 50–79% of normal       |
| IV: Severe   | $< 50\%$ of normal     |

ICD-10 codes associated with COPD include J40, J41, J42, J43, J44, and J47. The corresponding ICD-9 codes are 490-492, 494, and 496.

### Input data

For GBD 2016, we updated the systematic review from previous iterations. The full search term was:

*(chronic obstructive pulmonary disease[Title/Abstract] AND (prevalence[Title/Abstract] or incidence [Title/Abstract] or mortality [Title/Abstract] or death [Title/Abstract]) AND "Cross-Sectional Studies"[MeSH Terms]) Filters: Publication date from 04/01/2015 to 11/01/2016; Humans*

Twenty-three new sources were extracted. Studies excluding smokers were excluded from the review.

In addition, we include survey data with spirometry measurements, including the National Health and Nutrition Examination Study series in the United States. The Study of Aging and Global Health (SAGE) series was examined for GBD 2015 but ultimately excluded as the spirometry data had implausible FEV<sub>1</sub>/FVC values (eg, over 1).

Data using alternative case-definitions of COPD prevalence (i.e. LLN) were crosswalked to the reference case-definition with age-specific ratios derived from studies reporting prevalence using both the alternative and reference case-definitions.

Furthermore, claims data for the United States were included. Additional information on the claims data collection and pre-corrections are provided elsewhere. Briefly, we determined US national and state-level estimates of COPD prevalence from a database of individual level ICD-coded health service encounters. Persons with any claim associated with COPD were marked as a prevalent case for that year.

For GBD 2016, an additional correction was made for COPD US claims data. Under the assumption that NHANES estimates are more accurate than claims data estimates because they use spirometry measurements, we derived an age-specific crosswalk to adjust US claims data according to the ratio between NHANES and the national-level US claims estimates.

A table describing the density and distribution of the available data informing the COPD estimation process is provided below.

|                                    | Proportion by GOLD Class | Prevalence | Incidence |
|------------------------------------|--------------------------|------------|-----------|
| Studies                            | 15                       | 80         | 4         |
| Countries or subnational locations | 27                       | 119        | 4         |
| Regions                            | 15                       | 16         | 3         |

### Modelling strategy

As described above, the estimation of COPD burden occurs in three main steps. The first is the estimation of prevalence and incidence using a DisMod-MR 2.1 model. The second is the separate estimation of the proportions by three GOLD class groupings in DisMod-MR 2.1. The third is the combination of these two processes to derive prevalence by severity.

#### Step 1: Main COPD model

Prior settings include remission of 0 and an incidence ceiling of 0.0002 before age 20. The latter was necessary to avoid a kick-up of estimates in childhood at an age range with few or no primary data.

Similar to other causes, we include estimates of cause-specific mortality rate (CSMR) and derived estimates of excess mortality rate (EMR) by dividing every prevalence data point by the CSMR value for the corresponding location, age, sex, and year. We did not estimate EMR for data points with an age range greater than 20 years.

To assist estimation, each model includes a series of country-level covariates that describe spatiotemporal patterns. Where available, we use the COPD standardized exposure variables (SEV), which aggregate multiple risk factors into a single variable. We also use the log of LDI on EMR to capture country-level variation of EMR, assuming a negative coefficient (ie, lower mortality with rising GDP).

### Step 2: GOLD class models

The GOLD class models use data from surveys that specified prevalence by GOLD class after expressing the values as a proportion of all COPD cases. We use fixed effects from the SEV scalar and the log of lag-distributed income (LDI) per capita to assist estimation.

**Table of model coefficients for COPD and GOLD class models**

| Cause                  | Variable_name                         | Measure               | Beta                    | Exponentiated         |
|------------------------|---------------------------------------|-----------------------|-------------------------|-----------------------|
| COPD                   | LDI (I\$ per capita)                  | excess mortality rate | -0.5<br>(-0.5 — -0.5)   | 0.61<br>(0.60 — 0.61) |
| COPD                   | Log age-standardized SEV scalar: COPD | prevalence            | 0.75<br>(0.75 — 0.76)   | 2.12<br>(2.12 — 2.15) |
| GOLD I proportion      | Socio-demographic Index               | proportion            | 0.93<br>(-0.96 — 1.97)  | 2.54<br>(0.38 — 7.18) |
| GOLD I proportion      | Log age-standardized SEV scalar: COPD | proportion            | -0.17<br>(-0.62 — 0.33) | 0.84<br>(0.54 — 1.39) |
| GOLD II proportion     | Socio-demographic Index               | proportion            | 0.93<br>(-0.96 — 1.97)  | 2.54<br>(0.38 — 7.18) |
| GOLD II proportion     | Log age-standardized SEV scalar: COPD | proportion            | -0.17<br>(-0.62 — 0.33) | 0.84<br>(0.54 — 1.39) |
| GOLD III+IV proportion | Socio-demographic Index               | proportion            | 0.35<br>(-1.66 — 1.88)  | 1.42<br>(0.19 - 6.57) |
| GOLD III+IV proportion | Log age-standardized SEV scalar: COPD | proportion            | 0.018<br>(-0.8 — 0.78)  | 1.02<br>(0.45 — 2.17) |



## Severity

The three GOLD class groupings reflect a grading based on a physiological measurement rather than a direct measurement of disease severity. In order to map the epidemiological findings by GOLD Class into the three COPD health states for which we have disability weights (DW), we used the 2001–2011 Medical Expenditure Panel Survey (MEPS) data from the United States. Specifically, we convert the GOLD class designations estimated for the USA in 2005 (the midpoint of MEPS years of analyses) into GBD classifications of asymptomatic, mild, moderate, and severe COPD.

The table below shows the three health states of COPD and the corresponding lay descriptions and disability weights. The graph shows the average proportion by GOLD Class (after scaling to 100%) across all ages for USA in 2005. We also show the proportion of MEPS respondents reporting any health service contact in the past year for COPD with a DW value attributable to COPD of 0, mild range (0 to midpoint between DWs for mild and moderate), moderate range (midpoint of DW values mild and moderate to midpoint of DW values for moderate and severe) and severe range (midpoint between DW values moderate and severe or higher). The DW value for COPD was derived from a regression with indicator variables for all health states reported by MEPS respondents and their reported overall level of disability derived from a conversion of 12-Item Short Form Surveys (SF-12) answers to GBD DW values. This analysis gave the severity distribution for each GBD cause reported in MEPS after correcting for any comorbid causes individual respondents reported during a year.

| Health state  | Lay description                                                                                                                                                                                       | DW (95% CI)            |
|---------------|-------------------------------------------------------------------------------------------------------------------------------------------------------------------------------------------------------|------------------------|
| Mild COPD     | This person has cough and shortness of breath after heavy physical activity, but is able to walk long distances and climb stairs.                                                                     | 0.019<br>(0.011–0.033) |
| Moderate COPD | This person has cough, wheezing, and shortness of breath, even after light physical activity. The person feels tired and can walk only short distances or climb only a few stairs.                    | 0.225<br>(0.153–0.31)  |
| Severe COPD   | This person has cough, wheezing, and shortness of breath all the time. The person has great difficulty walking even short distances or climbing any stairs, feels tired when at rest, and is anxious. | 0.408<br>(0.273–0.556) |

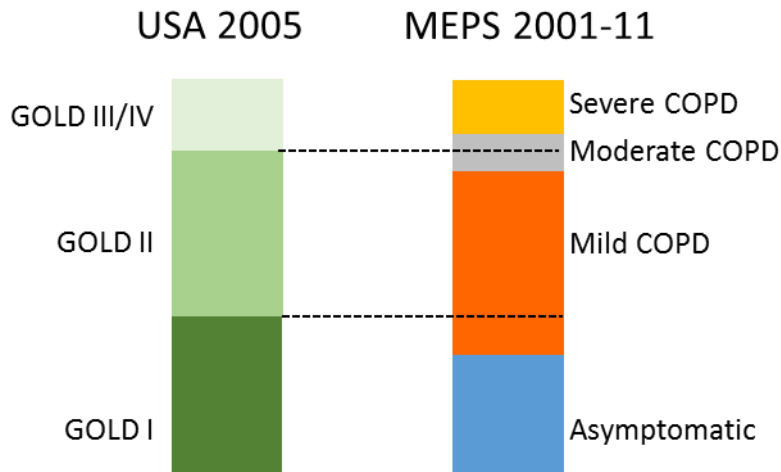

The algorithm to translate GOLD Class to COPD DW categories first assigns GOLD III&IV to severe COPD and what remains to moderate. Next, GOLD class I is assigned to the asymptomatic category first and what remains goes to mild COPD. This algorithm is repeated for each age and sex category and for all 1,000 draws from the DisMod models of GOLD classes and the MEPS analyses. We end up with proportions of each of the GOLD class categories that map onto GBD COPD health states with uncertainty bounds determined by the 25<sup>th</sup> and 975<sup>th</sup> values of the 1,000 draws. These values are then applied to the estimates of the proportion of cases by GOLD class category, after scaling to 100%, by location, year, age, and sex. This assumes that the relationship between GOLD class and GBD COPD health states in the United States applies everywhere.

# Pneumoconiosis

## Coal Worker's Pneumoconiosis, Asbestosis, Silicosis, and Other Pneumoconiosis

### Flowchart

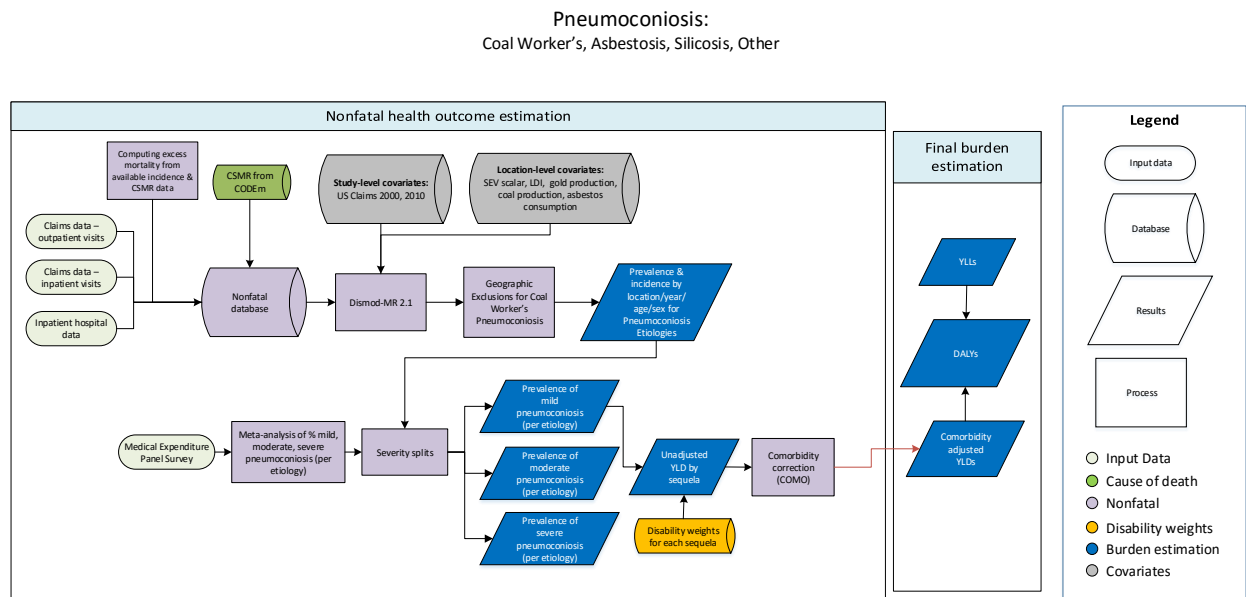

### Input data and methodological appendix

#### Case definition

Pneumoconiosis is a chronic lung disease typified by lung scarring and other interstitial damage caused by exposure to dust and other contaminants – usually through occupational exposure. For GBD, we model pneumoconiosis by exposure type: coal, asbestos, silica, and other.

#### Input data

A systematic review of the literature was conducted for pneumoconiosis using the following search string in PubMed:

*(Pneumoconiosis[Title/Abstract] AND prevalence[Title/Abstract])*

The search was restricted to humans and publications between January 2012 and November 2016. The search produced 31 hits, although no sources included useable data. Many studies were excluded on the basis of being from non-representative populations (eg, studies of prevalence of pneumoconiosis among groups of coal workers).

Data used to make estimates of pneumoconiosis are predominantly from four main sources. The first is literature data from previous systematic reviews – usually from smaller-scale studies or surveys of prevalence. The second are occupational exposure reports and registries produced by governmental

agencies. The third data format we use are collated hospital inpatient reports. The fourth main category of data are claims data – particularly for the United States. Greater detail on the preparation of the collated inpatient data and claims data is provided elsewhere. An overview of the data density and distribution by measure and location is present below for the four pneumoconiosis variants.

| <b>Silicosis</b> | Prevalence | Incidence | Mortality risk |
|------------------|------------|-----------|----------------|
| Studies          | 48         | 3         | 0              |
| Locations        | 214        | 3         | 0              |
| Regions          | 13         | 3         | 0              |

| <b>Coal worker's</b> | Prevalence | Incidence | Mortality risk |
|----------------------|------------|-----------|----------------|
| Studies              | 45         | 4         | 0              |
| Locations            | 239        | 4         | 0              |
| Regions              | 12         | 3         | 0              |

| <b>Asbestosis</b> | Prevalence | Incidence | Mortality risk |
|-------------------|------------|-----------|----------------|
| Studies           | 45         | 3         | 0              |
| Locations         | 263        | 3         | 0              |
| Regions           | 12         | 3         | 0              |

| <b>Other</b> | Prevalence | Incidence | Mortality risk |
|--------------|------------|-----------|----------------|
| Studies      | 58         | 0         | 0              |
| Locations    | 299        | 0         | 0              |
| Regions      | 15         | 0         | 0              |

For all etiologies, we use a sex-specific correction factor of the hospital inpatient data where numbers are adjusted upward by the ratio of primary diagnosis to secondary diagnosis present in the claims data.

### *Severity split inputs*

Data to inform estimates of the severity gradient due to pneumoconiosis etiologies are derived from previous analyses of the Medical Expenditure Panel Survey (MEPS). The disability weights are also shared.

| Severity level | Lay description                                                                                                                                                                           | DW (95% CI)            |
|----------------|-------------------------------------------------------------------------------------------------------------------------------------------------------------------------------------------|------------------------|
| Mild           | Has cough and shortness of breath after heavy physical activity, but is able to walk long distances and climb stairs.                                                                     | 0.019<br>(0.011–0.033) |
| Moderate       | Has cough, wheezing, and shortness of breath, even after light physical activity. The person feels tired and can walk only short distances or climb only a few stairs.                    | 0.225<br>(0.153–0.312) |
| Severe         | Has cough, wheezing, and shortness of breath all the time. The person has great difficulty walking even short distances or climbing any stairs, feels tired when at rest, and is anxious. | 0.408<br>(0.273–0.556) |

## Modelling strategy

Estimates for the pneumoconiosis etiologies are produced using a standard DisMod-MR 2.1 approach.

For all etiologies, we use prior settings of zero remission. Additionally, we assume no incidence and prevalence before the age of 10.

Claims data for 2000 and 2010 are adjusted via study covariates to account for systematically low estimates relative to the 2012 claims data. Implicit in this adjustment is the assumption that variation between years of claims data is a function of data collection inconsistencies and noise. As pneumoconiosis is a chronic disease largely caused by long-term occupational exposure and there is no evidence of rapid occupational shifts during the period of study, we ascribe observed differences to collection noise/error.

Similar to other causes, we include estimates of cause-specific mortality rate (CSMR) and Excess Mortality Rate (EMR) in this. The source and estimation of these rates are discussed elsewhere.

To assist estimation, each model includes a series of country-level covariates that describe spatiotemporal patterns.

For the most part, the same covariates from GBD 2015 were used. Adjustments were also made to the coal and asbestos covariates as follows.

The coal production covariate was improved to include subnational data for the United States and India. United States state-level data for 2001-2015 came from the U.S. Energy Information Administration. India state-level data for 2005-2014 came from the Ministry of Coal in India. We scaled these figures to the national estimates from the BP Statistical Review of World Energy 2016. For years with missing state-level data we split the national-level data according to the proportions by state in the closest year for which we did have state-level data.

We also created a covariate for asbestos consumption per capita with a 30-year lag, and used that instead of the GBD 2015 asbestos production covariate. This change is based on the idea that asbestos production may be too limited in scope, given that asbestosis may occur in locations where asbestos is used and handled but not necessarily mined. To create the asbestos consumption covariate we used data from the United States Geological Survey to run a model in DisMod 2.1. A 30-year lag was placed on this model to account for the delay between asbestos consumption and occurrence of disease.

Where available, we use standardized exposure variables (SEV) which aggregates multiple risk factors into a single variable. A full accounting is below:

| Cause      | Measure               | Variable_Name             | Beta                             | Exponentiated         |
|------------|-----------------------|---------------------------|----------------------------------|-----------------------|
| Asbestosis | excess mortality rate | LDI (I\$ per capita)      | -0.055<br>(-0.14 — -0.012)       | 0.95<br>(0.87 — 0.99) |
| Asbestosis | prevalence            | All MarketScan, year 2010 | -0.00057<br>(-0.0013 — -0.00013) | 1.00<br>(1.00 — 1.00) |

|                      |                             |                                                               |                                        |                             |
|----------------------|-----------------------------|---------------------------------------------------------------|----------------------------------------|-----------------------------|
| Asbestosis           | prevalence                  | All MarketScan, year 2000                                     | -0.00019<br>(-0.00087 — -<br>0.000033) | 1.00<br>(1.00 — 1.00)       |
| Asbestosis           | Prevalence                  | Asbestos Consumption<br>(per capita)                          | 0.0091<br>(0.00051 — 0.023)            | 1.01<br>(1.00 — 1.02)       |
| Coal worker's        | prevalence                  | All MarketScan, year 2000                                     | -0.0074<br>(-0.025 — -0.00035)         | 0.99<br>(0.98 — 1.00)       |
| Coal worker's        | prevalence                  | Log-transformed age-<br>standardized SEV scalar:<br>Coal W    | 1.00<br>(0.76 — 1.24)                  | 2.72<br>(2.14 — 3.46)       |
| Coal worker's        | prevalence                  | Coal Production (per<br>capita)                               | 1.19<br>(0.086 — 1.97)                 | 3.28<br>(1.09 — 7.19)       |
| Coal worker's        | prevalence                  | All MarketScan, year 2010                                     | -0.011<br>(-0.042 — -0.00023<br>)      | 0.99<br>(0.96 — 1.00)       |
| Coal worker's        | excess<br>mortality<br>rate | LDI (I\$ per capita)                                          | -1<br>(-1 — -1)                        | 0.37<br>(0.37 — 0.37)       |
| Other pneumoconiosis | prevalence                  | All MarketScan, year 2010                                     | -0.0097<br>(-0.035 — -<br>0.000015)    | 0.99<br>(0.97 — 1.00))      |
| Other pneumoconiosis | prevalence                  | Log-transformed SEV<br>scalar: Oth Pneum                      | 0.78<br>(0.75 — 0.87)                  | 2.19<br>(2.12 — 2.39)       |
| Other pneumoconiosis | excess<br>mortality<br>rate | LDI (I\$ per capita)                                          | -1<br>(-1 — -1)                        | 0.37<br>(0.37 — 0.37)       |
| Other pneumoconiosis | prevalence                  | All MarketScan, year 2000                                     | -0.0095<br>(-0.034 — -0.0002)          | 0.99<br>(0.97 — 1.00)       |
| Silicosis            | prevalence                  | All MarketScan, year 2000                                     | -0.0069<br>(-0.021 — -0.00032)         | 0.99<br>(0.98 — 1.00)       |
| Silicosis            | excess<br>mortality<br>rate | LDI (I\$ per capita)                                          | -0.5<br>(-0.5 — -0.5)                  | 0.61<br>(0.61 — 0.61)       |
| Silicosis            | prevalence                  | All MarketScan, year 2010                                     | -0.0076<br>(-0.027 — -0.00037)         | 0.99<br>(0.97 — 1.00)       |
| Silicosis            | prevalence                  | Log-transformed age-<br>standardized SEV scalar:<br>Silicosis | 1.24<br>(1.21 — 1.25)                  | 3.45<br>(3.36 — 3.49)       |
| Silicosis            | Prevalence                  | Gold Production (per<br>capita)                               | 2.75<br>(0.17 — 4.91)                  | 15.71<br>(1.18 —<br>135.10) |

To account for country level differences in excess mortality (perhaps as a function of available medical care) we use  $\ln(\text{lag distributed income})$  as a proxy measure.

For GBD 2015 prevalence and incidence of coal worker's pneumoconiosis and asbestosis were set to zero in locations without a history of coal mining or asbestosis production given the causal and necessary relationship between respective occupational exposure and disease. For GBD 2016 we removed the geographical exclusions for asbestosis, given our move to a consumption covariate, as mentioned above.

# Asthma

## Flowchart

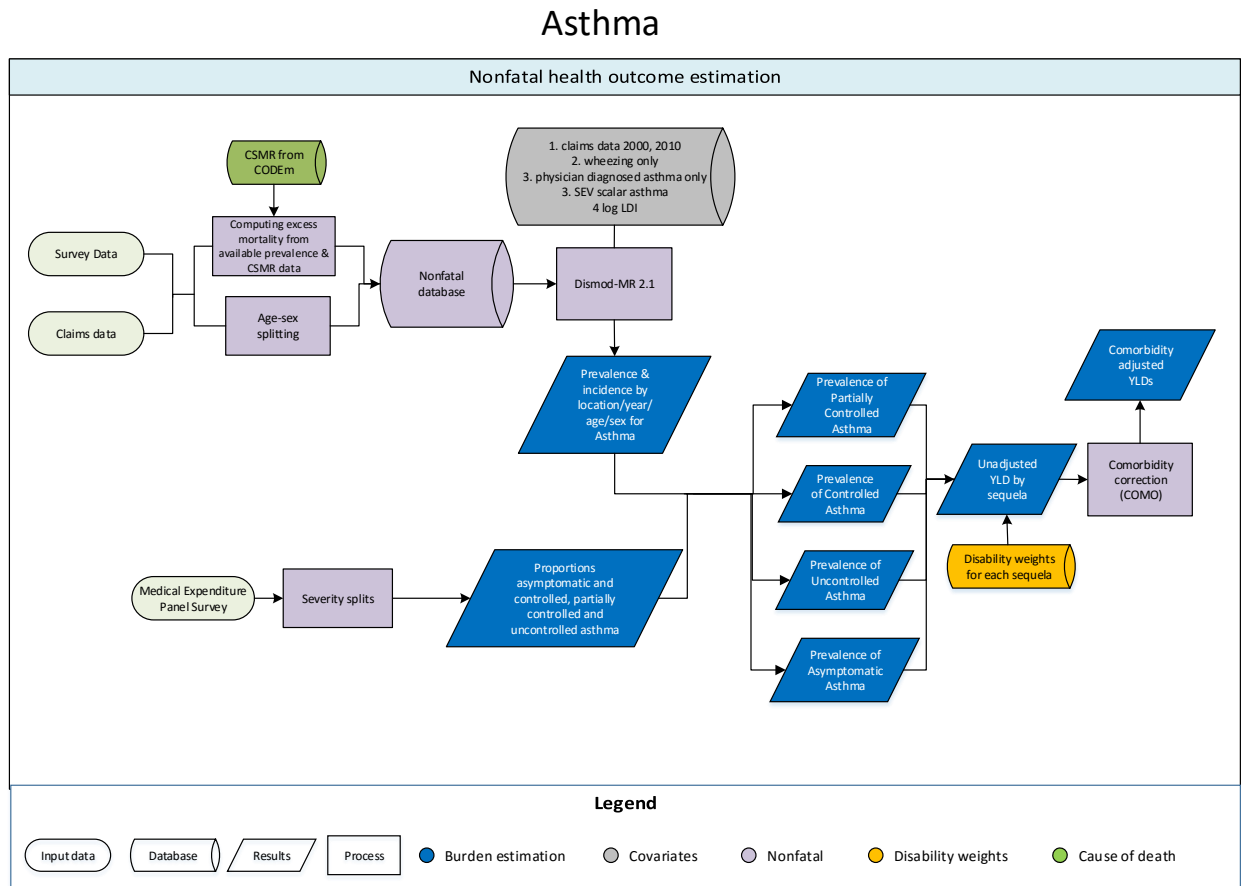

### Case definition

Asthma is a chronic lung disease marked by spasms in the bronchi usually resulting from an allergic reaction or hypersensitivity and causing difficulty in breathing. We define asthma as a doctor's diagnosis and wheezing in the past year. The relevant ICD-10 codes are J45 and J46. ICD-9 code is 493.

### Input data

For GBD 2016, we did a full systematic review of the literature on asthma. We used the following search string in PubMed and filtered by studies of humans published between January 2012 and November 2016.

(Asthma[Title/Abstract] AND prevalence[Title/Abstract] AND "Cross-Sectional Studies"[MeSH Terms])



From this search, we had 533 hits. Of these, 47 sources were extracted after full-text screening and incorporated into the GBD 2016 model.

Additional survey data added for GBD 2016 were mainly from India: International Study of Asthma and Allergies in Childhood (ISAAC); National Family Health Survey; WHO Study on global AGEing and adult health (SAGE); and Indian Study on Epidemiology of Asthma, Respiratory Symptoms and Chronic Bronchitis (INSEARCH).

Surveys carried out as part of the ISAAC collaboration are the most important source of prevalence data in children.

The following table provides a description of the data density and distribution by location and epidemiological measure (including the claims data discussed below).

|                                 | Prevalence | Incidence | Mortality risk |
|---------------------------------|------------|-----------|----------------|
| Studies                         | 302        | 7         | 6              |
| Countries/subnational locations | 354        | 5         | 3              |
| Regions                         | 21         | 1         | 1              |

In addition to literature and survey data, we use claims data from the United States from 2000, 2010, and 2012. Information on the source and preparation of these data are provided in detail elsewhere. Briefly, we determined US national and state level estimates of asthma prevalence from a database of individual-level ICD-coded health service encounters for three years. Persons with any claim associated with asthma were marked as a prevalent case for that year. Aggregated estimates were then adjusted using a noise-reduction algorithm. These corrected data were then used in the modelling process.

## Modelling strategy

We use DisMod-MR 2.1 as the main modelling tool for asthma. Prior settings include a maximum remission of 0.3 (reflecting the upper bound of the highest observed data) and no incidence between the ages of 0 and 0.5 year, as a diagnosis cannot be made in young infants.

Data points from the ISAAC studies were reported for both sexes combined. We sex-split before modelling using the ratios derived from the 2012 US claims data (1).

Data that describe wheezing in the past year, but do not report presence/absence of an accompanying diagnosis are crosswalked to the reference category using a study-level covariate in DisMod. As the table below shows, studies that only report wheezing are systematically higher than reference data points and are adjusted down -- dividing by the exponentiated coefficient. Data that describe prevalence of lifetime diagnosis of asthma but not accompanying wheezing in the past year are also crosswalked to the reference category using a study-level covariate.

To account for country-level differences in excess mortality as a function of available medical care we use log lag-distributed income (LDI) as a covariate and assume a negative coefficient. The effect size is shown below.

Claims data for 2000 and 2010 are adjusted via study covariates to account for systematically lower estimates relative to the 2012 claims data. Implicit in this adjustment is the assumption that variation between years of claims data is a function of data-collection inconsistencies.

Similar to other causes, we include estimates of cause-specific mortality rate (CSMR) and excess mortality rate (EMR) derived as a matched value for each prevalence data point dividing CSMR by prevalence. We restrict these EMR calculations to data points of 20-year age span or less.

To assist estimation, the model includes a series of country-level covariates that describe spatiotemporal patterns. Specifically, we use log LDI and the asthma standardized exposure variable (SEV), a scalar that combines exposure of all GBD risks that influence asthma. A full covariate list, including the study-level covariates, described above are presented in the following table with their associated effects:

| Variable_name                   | Measure               | Beta                       | Exponentiated         |
|---------------------------------|-----------------------|----------------------------|-----------------------|
| Wheezing only                   | prevalence            | 0.46<br>(0.43 - 0.50)      | 1.59<br>(1.53 – 1.65) |
| Physician diagnosed asthma only | prevalence            | -0.091<br>(-0.14 – -0.038) | 0.91<br>(0.87 – 0.96) |
| Claims data 2000                | prevalence            | -0.53<br>(-0.56 - -0.5)    | 0.59<br>(0.57 – 0.61) |
| Claims data 2010                | prevalence            | -0.13<br>(-0.15 – -0.1)    | 0.88<br>(0.86 – 0.90) |
| Log SEV scalar: asthma          | prevalence            | 1.24<br>(1.20 – 1.25)      | 3.44<br>(3.33 – 3.49) |
| Log LDI (I\$ per capita)        | excess mortality rate | -0.5<br>(-0.5 – -0.5)      | 0.61<br>(0.61 – 0.61) |

### Severity split inputs

Lay descriptions and disability weights for the asthma health states are shown in the table below. The distribution between the three health states is derived from an analysis of the US Medical Expenditure Panel Surveys (MEPS). The methods are described in full in a separate section of this appendix. Briefly, MEPS is an ongoing survey of health service encounters with as its main objective to collect data on health expenditure. Panels are recruited every year and followed up for a period of two years. Diagnostic information provided by respondents on the reasons for any health care contact are coded into three-digit ICD-9 codes by professional coders.

Twice over the two-year follow-up period respondents are asked to fill in 12-Item Short Form Surveys (SF-12). From convenience samples asking respondents to fill in SF-12 for 60 of the GBD health states, IHME has created a mapping from SF-12 scores to GBD Disability Weights (DW). We perform a regression with indicator variables for all GBD causes that we can identify from the ICD codes in MEPS to derive for each individual with a diagnosis the amount of disability that can be attributed to that condition after

controlling for any comorbid conditions. Anyone with a diagnosis of asthma in whom the disability assigned to asthma is negative or zero we assume is asymptomatic (at the time of asking SF-12 question relating to their health status in the past four weeks). Non-zero values we bin into the three health states assuming a split between these at the midpoint between DW values. The table below gives the proportions in MEPS in each of the health states and an asymptomatic state.

| Severity level       | Lay description                                                                                                                                                         | DW (95% CI)            | Severity distribution |
|----------------------|-------------------------------------------------------------------------------------------------------------------------------------------------------------------------|------------------------|-----------------------|
| Asymptomatic         |                                                                                                                                                                         |                        | 36.2%<br>(35.0–37.3%) |
| Controlled           | This person has wheezing and cough once a month, which does not cause difficulty with daily activities.                                                                 | 0.015<br>(0.007–0.026) | 19.9%<br>(13.6–27.8%) |
| Partially controlled | This person has wheezing and cough once a week, which causes some difficulty with daily activities.                                                                     | 0.036<br>(0.022–0.055) | 20.6%<br>(15.1–25.8%) |
| Uncontrolled         | This person has wheezing, cough, and shortness of breath more than twice a week, which causes difficulty with daily activities and sometimes wakes the person at night. | 0.133<br>(0.086–0.192) | 23.3%<br>(18.7–30.3%) |

There were no significant changes in modelling approach from GBD 2015.

# Interstitial Lung Disease and Pulmonary Sarcoidosis (ILD)

## Flowchart

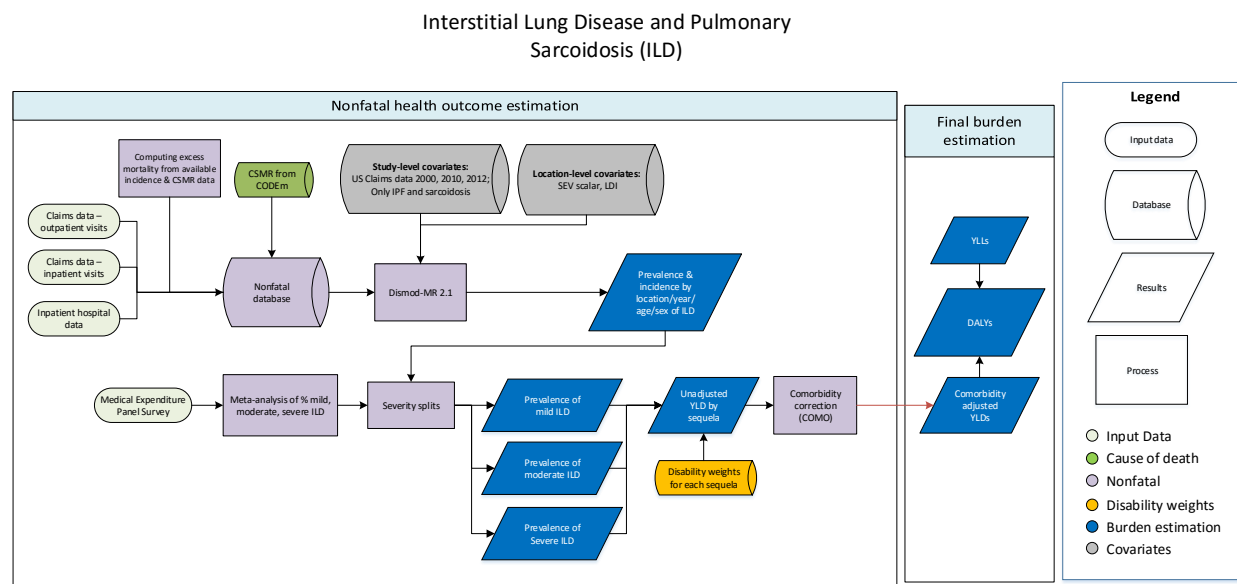

## Case definition

Interstitial lung diseases and pulmonary sarcoidosis are a collection of chronic respiratory diseases that impair lung function and oxygen uptake through scarring and/or inflammation. The relevant ICD codes are D86 and J84. For interstitial lung disease, we use the American Thoracic Society as the gold standard definition.

## Input data

### Model Inputs

No systematic review of the literature was conducted for ILD for this iteration of the Global Burden of Disease. These reviews done on a rotating basis and updates will be made for a future iteration.

Data used to make estimates of ILD are predominantly from three main sources. The first is literature data from previous systematic reviews – usually from smaller-scale studies of prevalence. The second main data type is claims data for the United States. The source and preparation of these data is described elsewhere. The third main data type is adjusted hospital inpatient records. Because these records only report primary diagnosis, we a priori adjust the numbers by a sex-specific factor based on patterns observed in the US claims data – that is, the ratio of primary to secondary diagnoses.

The following table provides a picture of the number of available studies along with their distribution globally and by epidemiological profile. In short, the ILD data landscape is rather sparse. The available data are largely skewed toward high-income countries like the United States or the member countries of

the European Union. The relatively high number of subnational units with data is largely a function of claims data in the United States and hospital data from Mexico and Brazil.

|           | Prevalence | Incidence | Mortality risk |
|-----------|------------|-----------|----------------|
| Studies   | 51         | 19        | 0              |
| Locations | 261        | 15        | 0              |
| Regions   | 11         | 6         | 0              |

### Severity splits

Data to inform estimates of the severity gradient due to ILD are derived from previously analyses of the Medical Expenditure Panel Survey (MEPS). The table below illustrates the lay descriptions and disability weights associated with different levels of severity of interstitial lung disease.

| Severity level | Lay description                                                                                                                                                                           | DW (95% CI)            |
|----------------|-------------------------------------------------------------------------------------------------------------------------------------------------------------------------------------------|------------------------|
| Mild           | Has cough and shortness of breath after heavy physical activity, but is able to walk long distances and climb stairs.                                                                     | 0.019<br>(0.011–0.033) |
| Moderate       | Has cough, wheezing, and shortness of breath, even after light physical activity. The person feels tired and can walk only short distances or climb only a few stairs.                    | 0.225<br>(0.153–0.312) |
| Severe         | Has cough, wheezing, and shortness of breath all the time. The person has great difficulty walking even short distances or climbing any stairs, feels tired when at rest, and is anxious. | 0.408<br>(0.273–0.556) |

### Modelling strategy

Estimates for ILD are produced using a standard DisMod-MR 2.1 approach. We use prior settings of zero remission and we constrain the super-region random effects to -0.5 to 0.5 to ensure model stability.

As described above, we use an a priori adjustment of hospital inpatient data to correct for secondary diagnoses available in the claims data.

Similar to other causes, we include estimates of cause-specific mortality rate (CSMR) and Excess Mortality Rate (EMR). The source and estimation of these rates are discussed elsewhere.

The GBD ethic is to use all available data sources where reasonable. Because ILD consists of many smaller etiologies not broken out here, we make crosswalks to account for measurement, case definition, and study design differences. The full list is below:

| Variable_Name                                      | Measure    | Beta                     | Exponentiated         |
|----------------------------------------------------|------------|--------------------------|-----------------------|
| Only idiopathic pulmonary fibrosis and sarcoidosis | prevalence | -1.49<br>(-1.96 – -0.88) | 0.22<br>(0.14 – 0.41) |
| All MarketScan, year 2000                          | prevalence | 1.15<br>(1.10 – 1.19)    | 3.15<br>(3.00 – 3.29) |

|                                                    |                       |                          |                       |
|----------------------------------------------------|-----------------------|--------------------------|-----------------------|
| All MarketScan, year 2010                          | prevalence            | 1.40<br>(1.37 – 1.44)    | 4.07<br>(3.93 – 4.24) |
| All MarketScan, year 2012                          | prevalence            | 1.40<br>(1.35 – 1.43)    | 4.04<br>(3.88 – 4.19) |
| Only idiopathic pulmonary fibrosis and sarcoidosis | incidence             | -0.87<br>(-1.53 – -0.19) | 0.42<br>(0.22 – 0.83) |
| LDI (I\$ per capita)                               | excess mortality rate | -0.2<br>(-0.2 – -0.2)    | 0.82<br>(0.82 – 0.82) |

To account for country level differences in excess mortality (perhaps as a function of available medical care) we use ln(lag distributed income) as a proxy measure. The effect size is shown above.

## Other chronic respiratory diseases

In addition to the chronic respiratory diseases described above, there are many diverse types of chronic respiratory diseases with a range of severities and associated sequelae. Because these chronic respiratory diseases are diverse in their underlying causes and risk factors as well as in their associated health outcomes, modelling them together in a DisMod-MR model would not produce reliable estimates of prevalence or excess mortality. Instead, we calculated the YLDs caused by other chronic respiratory diseases directly using a YLD/YLL ratio.

We calculated the ratio of YLDs to YLLs across the specified chronic respiratory diseases for which nonfatal outcomes were modelled, using YLL estimates from the GBD 2016 cause of death (CoD) analysis. We then multiplied this YLD/YLL ratio by the YLL estimates for other chronic respiratory diseases from the GBD 2016 CoD analysis, providing us with an estimate of the YLDs associated with other chronic respiratory diseases.

# Cirrhosis

## Flowchart

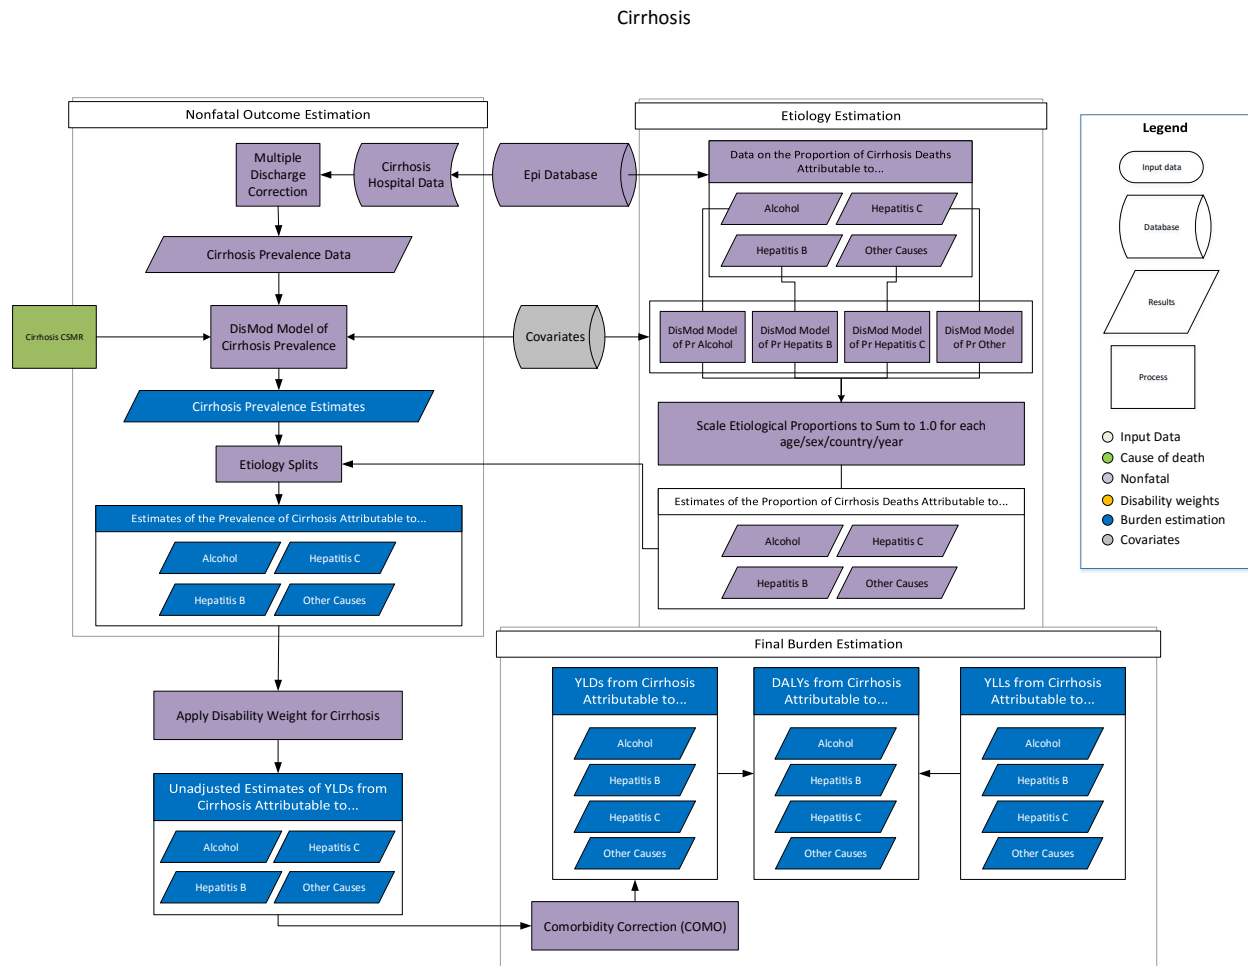

## Input data and methodological summary

### Case definition

Cirrhosis is a chronic liver disease most often caused by alcohol use or chronic infection with hepatitis B or C. Early disease is typically asymptomatic as the liver's resilience compensates for cirrhotic damage. Decompensated cirrhosis occurs when the disease progresses beyond the capacity of the liver to compensate for the damage, and is marked by profound symptoms, health loss and, often, death. We model decompensated cirrhosis, defined by cirrhosis (or a closely related diagnosis code) as the primary diagnosis in hospital data. We model total cirrhosis (compensated plus decompensated) when cirrhosis is a secondary diagnosis in hospital data. This includes ICD1-0 codes K70-K77, I85, P78.81.



## Input data

### *Model inputs*

For GBD 2016, we modelled cirrhosis prevalence based on hospital data, which have been updated to reflect the new estimation cycle. This year, we added data from MarketScan to our prevalence estimation process. The table below indicates the number of data points, as well as the location and regional breakdown of non-hospital and non-MarketScan data. Decompensated cirrhosis only used inpatient MarketScan data, whereas compensated used inpatient and outpatient.

**Table 1. Data inputs for the cirrhosis parent model (not including hospital inpatient data)**

|                        | Prevalence | Incidence |
|------------------------|------------|-----------|
| Studies                | 0          | 1         |
| Countries/subnationals | 0          | 1         |
| Countries              | 0          | 1         |
| GBD world regions      | 0          | 1         |
| GBD super-regions      | 0          | 1         |

We model etiologic proportions based on published estimates of the proportion of cirrhosis due to alcohol use, hepatitis B, hepatitis C, and other causes:

**Table 2. Data inputs for the etiologic proportion models**

|                        | Alcohol | Hepatitis B | Hepatitis C | Other |
|------------------------|---------|-------------|-------------|-------|
| Studies                | 54      | 80          | 88          | 41    |
| Countries/subnationals | 27      | 41          | 46          | 21    |
| Countries              | 25      | 35          | 39          | 20    |
| GBD world regions      | 14      | 17          | 18          | 11    |
| GBD super-regions      | 7       | 7           | 7           | 7     |

For GBD 2016, we conducted a systematic review of the literature to capture studies of the proportion of cirrhosis attributable to alcohol, hepatitis B, hepatitis C, and other causes. We searched the peer-reviewed literature via PubMed and solicited sources from GBD collaborators.

The inclusion criteria stipulated that: 1) the publication year must be from 1980 onward; 2) the sample had to be a representative sample of those with decompensated cirrhosis (eg, studies of patients with both HCC and cirrhosis were excluded); 3) sufficient information must be provided on study method and sample characteristics to assess the quality of the study; 4) hepatitis B and C were confirmed via HBsAg, in the case of hepatitis B, and anti-HCV IgG, in the case of hepatitis C.

Data were outliered or excluded if we found them unreasonable when compared to regional, super-regional, and global rates.

### *Severity splits*

The basis of the GBD disability weight survey assessments are lay descriptions of sequelae highlighting major functional consequences and symptoms.

**Table 3. Severity level and lay descriptions**

| Sequela name                                             | Health state description                                                                       | Disability weight (95% CI) |
|----------------------------------------------------------|------------------------------------------------------------------------------------------------|----------------------------|
| Cirrhosis of the liver due to alcohol, decompensated     | Has a swollen belly and swollen legs. The person feels weakness, fatigue and loss of appetite. | 0.178<br>(0.122-0.25)      |
| Cirrhosis of the liver due to hepatitis B, decompensated | Has a swollen belly and swollen legs. The person feels weakness, fatigue and loss of appetite. | 0.178<br>(0.123-0.25)      |
| Cirrhosis of the liver due to hepatitis C, decompensated | Has a swollen belly and swollen legs. The person feels weakness, fatigue and loss of appetite. | 0.178<br>(0.122-0.25)      |
| Cirrhosis of the liver due to other cause, decompensated | Has a swollen belly and swollen legs. The person feels weakness, fatigue and loss of appetite. | 0.178<br>(0.122-0.25)      |

### Modelling strategy

We modelled cirrhosis prevalence using hospital data and CSMR estimates, assuming no remission. For GBD 2016 we modeled compensated cirrhosis. Compensated cirrhosis was estimated by subtracting year, sex, age, and location specific draws of compensated cirrhosis from the corresponding draws of total cirrhosis. To estimate the prevalence of cirrhosis due to alcohol, cirrhosis due to hepatitis B, cirrhosis due to hepatitis C, and cirrhosis due to other causes, we developed aetiological proportion models using DisMod, and used the results of these models to split the compensated and decompensated cirrhosis prevalence estimates.

Given the similar etiologies for liver cancer and cirrhosis we integrated the etiology models for these two causes. We have more data for liver cancer etiologies than we do for cirrhosis. Therefore, we first developed four single-parameter DisMod models, each to estimate the proportion of liver cancer due to a given cause (ie, alcohol, hepatitis B, hepatitis C, and other). These models included as covariates alcohol consumption (litres per capita), hepatitis B surface antigen (HBsAg) seroprevalence, and hepatitis C (anti-HCV IgG) seroprevalence. Moreover, the model for the proportion due to alcohol included a binary covariate indicating countries with a predominantly Muslim population (thought to be associated with very low alcohol consumption). Estimates from these liver cancer models were then used as covariates (along with alcohol, HBsAg, and anti-HCV) in the four corresponding cirrhosis aetiology models. Estimates from these cirrhosis models were then similarly used as covariates in the corresponding liver cancer models. Proportions from the four etiology models were then rescaled to sum to one at the draw level, and used to split the parent compensated and decompensated cirrhosis estimates.

Study level covariates were used to adjusted prevalence data from hospital inpatient data and US claims data (2000 and 2010) toward the level of other prevalence data points, which were more representative of the general population. The healthcare quality and access index was used as a location-level covariate on excess mortality to guide estimates for countries with few or no data.

**Table 4. Beta and exponentiated values for total cirrhosis**

| Study covariate    | Parameter  | Beta                  | Exp(beta)          |
|--------------------|------------|-----------------------|--------------------|
| Hospital Inpatient | Prevalence | 1.40 (1.40 - 1.40)    | 4.05 (4.05 - 4.06) |
| Claims data - 2000 | Prevalence | -0.70 (-0.74 - -0.66) | 0.50 (0.47 - 0.52) |

|                    |            |                       |                    |
|--------------------|------------|-----------------------|--------------------|
| Claims data - 2010 | Prevalence | -0.03 (-0.07 - -0.00) | 0.97 (0.93 - 1.00) |
|--------------------|------------|-----------------------|--------------------|

**Table 5. Location-level beta and exponentiated values for total cirrhosis**

| Country-level covariate             | Parameter             | Beta                  | Exp(beta)          |
|-------------------------------------|-----------------------|-----------------------|--------------------|
| Healthcare access and quality index | Excess mortality rate | -0.08 (-0.09 - -0.07) | 0.93 (0.91 - 0.93) |

**Table 6. Beta and exponentiated values for decompensated cirrhosis**

| Study covariate                   | Parameter | Beta                       | Exp(beta)             |
|-----------------------------------|-----------|----------------------------|-----------------------|
| Inpatient only claims data – 2000 | Incidence | -0.9 (-0.94 – -0.87)       | 0.40 (0.39 – 0.42)    |
| Inpatient only claims data – 2010 | Incidence | -0.011 (-0.031 – -0.00031) | 0.99 (0.97 – 1.00)    |
| Hospital inpatient data           | Incidence | -2.5 (-2.5 – -2.5)         | 0.082 (0.082 – 0.082) |

**Table 7. Location-level beta and exponentiated values for decompensated cirrhosis**

| Country-level covariate             | Parameter             | Beta                    | Exp(beta)          |
|-------------------------------------|-----------------------|-------------------------|--------------------|
| Healthcare access and quality index | Excess mortality rate | -0.02 (-0.021 – -0.019) | 0.98 (0.98 – 0.98) |

### Changes from GBD 2015 to GBD 2016

We added the MarketScan database to our input data and modeled compensated cirrhosis for the first time.

# Peptic Ulcer Disease

## Flowchart

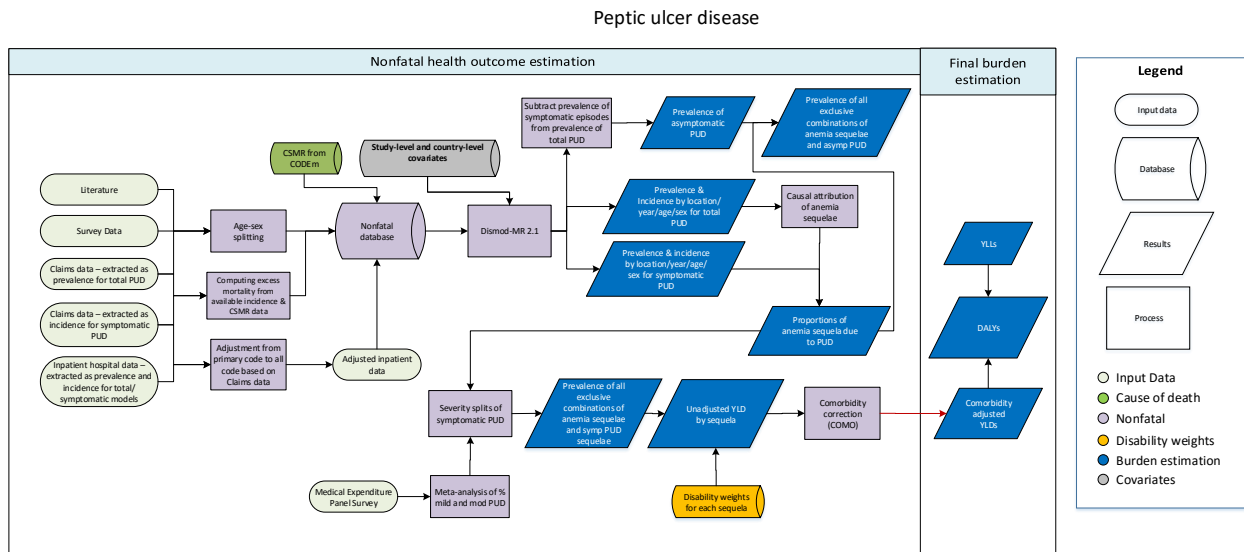

## Case definition

Peptic ulcer disease is a digestive disorder involving ulcers in the lining of the stomach (gastric ulcers) or the duodenum (duodenal ulcers), diagnosed by endoscopy. Peptic ulcer disease is often asymptomatic with periodic symptomatic episodes of heartburn, bloating, nausea, or vomiting, and in severe cases, bleeding. ICD codes included are K25, K26, K27, K28, and K31.

## Input data

### Model inputs

In GBD 2016, chronic peptic ulcer disease was renamed to total peptic ulcer disease, symptomatic and asymptomatic (total peptic ulcer). Data inputs were separate for the total peptic ulcer and symptomatic episode models. A systematic review of literature was conducted to capture studies of prevalence, incidence associated with peptic ulcer disease. For GBD 2016, the search was conducted in peer-reviewed literature via PubMed. The inclusion criteria stipulated that (1) “caseness” must be based on clinical threshold as established by the ICD; (2) sufficient information must be provided on study methods and sample characteristics to assess the quality of the study; and (3) study samples must be representative of the general population (ie, samples of patients prescribed gastroscopies due to gastric pain or populations with *H. pylori* bacteria were excluded).

For the total peptic ulcer dataset we also included hospital inpatient and US claims data from 2000, 2010, and 2012 at the US state level, extracted as prevalence. The claims data were extracted using all diagnoses, and the hospital data were adjusted for only recording primary diagnoses, using a correction factor from claims data. For GBD 2016, we also extracted national surveys for doctor-confirmed, self-reported diagnoses of peptic ulcer disease and adjusted the data with a study-level covariate.

For the symptomatic episode dataset, we also considered literature sources that specifically referenced bleeding, perforations, and hospital visits, and extracted hospital inpatient and US claims data from 2000, 2010, and 2012 at the US state level, extracted as incidence to capture individual episodes. These data were similarly extracted and adjusted to estimate all diagnoses. Data were outliered or excluded if we found them unreasonable when compared to regional, super-regional, and global rates.

The tables below show the number of studies included in GBD 2016, as well as the number of countries or subnational units and GBD world regions represented.

Total peptic ulcer disease, symptomatic and asymptomatic

|                        | Prevalence | Incidence |
|------------------------|------------|-----------|
| Studies                | 31         | 1         |
| Countries              | 41         | 1         |
| Countries/subnationals | 324        | 1         |
| GBD world regions      | 6          | 1         |

Symptomatic episodes of peptic ulcer disease

|                        | Prevalence | Incidence |
|------------------------|------------|-----------|
| Studies                | 0          | 7         |
| Countries              | 0          | 17        |
| Countries/subnationals | 0          | 119       |
| GBD world regions      | 0          | 3         |

*Severity split & disability weight*

The basis of the GBD disability weight survey assessments are lay descriptions of sequelae highlighting major functional consequences and symptoms. For GBD 2016, we added a mild sequela to symptomatic episodes of peptic ulcer disease with proportions of cases derived from the MEPS. The lay descriptions and disability weights for peptic ulcer disease are shown below:

| Severity level                                      | Lay description                                                                                          | DW (95% CI)         |
|-----------------------------------------------------|----------------------------------------------------------------------------------------------------------|---------------------|
| Mild peptic ulcer disease, symptomatic episodes     | This person has some pain in the belly that causes nausea but does not interfere with daily activities.  | 0.011 (0.005-0.021) |
| Moderate peptic ulcer disease, symptomatic episodes | This person has pain in the belly and feels nauseous. The person has difficulties with daily activities. | 0.114 (0.080-0.159) |

\*The numerous sequelae generated from exclusive combinations of anemia and peptic ulcer disease each contain custom disability weights. More information can be found in the appendix detailing disability weights.

**Modelling strategy**

The DisMod model for total peptic ulcer disease included bounding remission from 0.1 to 0.5 (a duration of two to ten years), zero incidence from 0 to 5 years of age. Reference data were from literature and our most complete claims data set (2012). We marked inpatient, other US claims years data, and national survey data with study-level covariates. We used the function in DisMod-MR 2.1 to pull in cause-specific mortality rate (CSMR) data from our CODEm and CODcorrect analyses and match with prevalence data points for the same location. We calculated excess mortality rate to estimate priors by dividing CSMR by prevalence. We also applied a lag-distributed income and a healthcare access and quality index country-covariate to excess mortality, forced negative. Betas and exponentiated values (which can be interpreted as an odds ratio) are shown in the tables below for study-level covariates and country-level covariates.

| <b>Covariate type</b> | <b>Covariate</b>                    | <b>Parameter</b>      | <b>beta</b>           | <b>Exponentiated beta</b> |
|-----------------------|-------------------------------------|-----------------------|-----------------------|---------------------------|
| Study-level covariate | Hospital Inpatient                  | Prevalence            | 0.73 (0.67 - 0.79)    | 2.08 (1.96 - 2.20)        |
| Study-level covariate | Self-reported                       | Prevalence            | 0.60 (0.52 - 0.67)    | 1.82 (1.69 - 1.95)        |
| Study-level covariate | Claims data - 2000                  | Prevalence            | -0.27 (-0.31 - -0.22) | 0.77 (0.73 - 0.80)        |
| Study-level covariate | Claims data - 2010                  | Prevalence            | 0.05 (0.01 - 0.09)    | 1.05 (1.01 - 1.10)        |
| Country covariate     | LDI (I\$ per capita)                | Excess mortality rate | -0.47 (-0.49 - -0.45) | 0.63 (0.61 - 0.64)        |
| Country covariate     | Healthcare access and quality index | Excess mortality rate | -0.01 (-0.01 - -0.01) | 0.99 (0.99 - 0.99)        |

The symptomatic episodes of peptic ulcer disease DisMod model bounded remission from 16.5 to 17.5 (a duration of about three weeks). We also assumed no incidence from 0 to 5 years old, and excess mortality capped at 0.1 for all ages. The reference data were US claims data from 2012, and we marked other US claims years data, inpatient hospital data with study-level covariates. We used the function in DisMod-MR 2.1 to pull in cause-specific mortality rate (CSMR) data from our CODEm and CODcorrect analyses and match with prevalence data points for the same location. We calculated excess mortality rate to estimate priors by dividing CSMR by prevalence. We also applied a lag-distributed income covariate to excess mortality, log transformed and forced negative with an upper bound of -0.1 and a lower bound of -1, and a log-transformed age-standardized death rate for stomach cancer to incidence. Betas and exponentiated values (which can be interpreted as an odds ratio) are shown in the tables below for study-level covariates and country-level covariates.

| <b>Covariate type</b> | <b>Covariate</b>     | <b>Parameter</b>      | <b>beta</b>           | <b>Exponentiated beta</b> |
|-----------------------|----------------------|-----------------------|-----------------------|---------------------------|
| Study-level covariate | Hospital Inpatient   | Incidence             | 0.77 (0.71 - 0.83)    | 2.16 (2.03 - 2.30)        |
| Study-level covariate | Claims data - 2000   | Incidence             | 0.04 (-0.01 - 0.09)   | 1.04 (0.99 - 1.09)        |
| Study-level covariate | Claims data - 2010   | Incidence             | -0.08 (-0.12 - -0.03) | 0.93 (0.89 - 0.97)        |
| Country covariate     | LDI (I\$ per capita) | Excess mortality rate | -0.61 (-0.63 - -0.58) | 0.55 (0.53 - 0.56)        |

To calculate prevalence asymptomatic peptic ulcer disease, we took the estimated prevalence of symptomatic episodes, and subtracted it from our estimated prevalence of total peptic ulcer disease. Methods for causal attribution of anemia due to peptic ulcer can be found elsewhere in the appendix detailing strategies for impairments. Each final combination of sequela of anemia and peptic ulcer disease underwent exclusivity adjustments to prevent double counting.

# Gastritis and duodenitis

## Flowchart

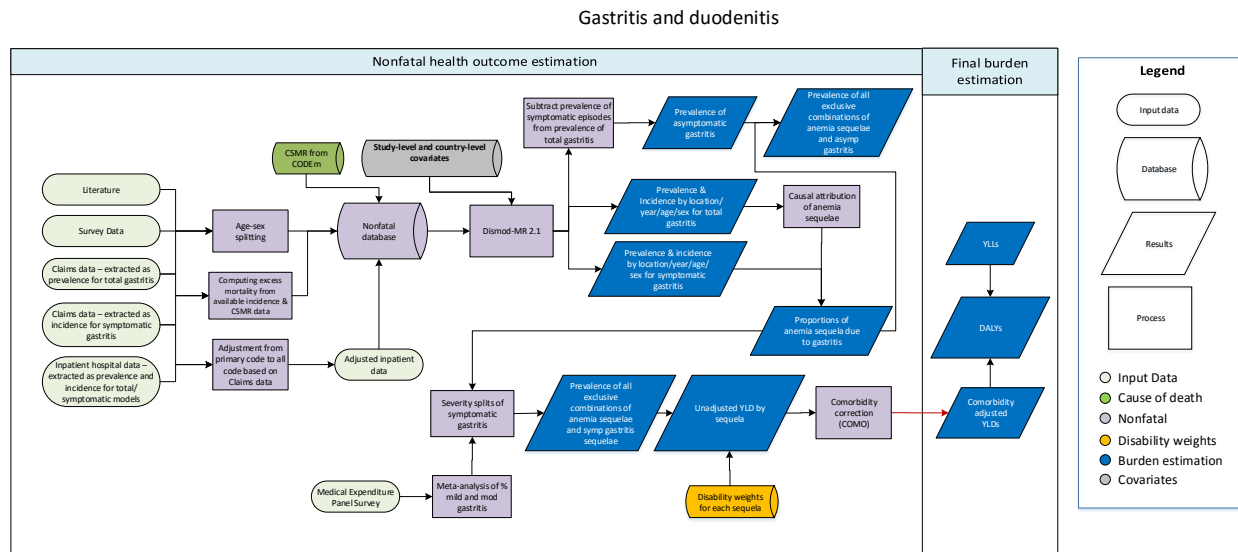

## Case definition

Gastritis and duodenitis are digestive disorders involving inflammation of the stomach lining (gastritis) or the duodenum (duodenitis). Gastritis and duodenitis can often be asymptomatic with periodic symptomatic episodes of nausea, vomiting, indigestion, stomach pain, and in severe cases, internal bleeding. ICD code included is K29.

## Input data

### Model inputs

In GBD 2016, chronic gastritis and duodenitis was renamed to total gastritis and duodenitis, symptomatic and asymptomatic (total gastritis). Data inputs were separate for the total gastritis and symptomatic episode models. A systematic review of literature was conducted to capture studies of prevalence, and incidence associated with gastritis and duodenitis. The inclusion criteria were studies that are representative of the national population (ie. excluded populations of patients with *H. pylori*), and studies with sufficient information methods and sample characteristics. Reviews were excluded from the search results.

In addition to literature data, we included hospital inpatient and US claims data from 2000, 2010, and 2012 at the US state level, extracted as prevalence for the total gastritis dataset. The claims data were extracted using all diagnoses, and the hospital data were adjusted for only recording primary diagnoses, using a correction factor from claims data.

For the symptomatic episode dataset, we used extracted hospital inpatient and US claims data from 2000, 2010, and 2012 at the US state level, extracted as incidence to capture individual episodes. These

data were similarly extracted and adjusted to estimate all diagnoses. Data were outliered or excluded if we found them unreasonable when compared to regional, super-regional, and global rates.

The tables below show the number of studies included in GBD 2016, as well as the number of countries or subnational units and GBD world regions represented.

#### Total gastritis and duodenitis, symptomatic and asymptomatic

|                        | Prevalence | Incidence |
|------------------------|------------|-----------|
| Studies                | 82         | 1         |
| Countries              |            |           |
| Countries/subnationals | 164        | 1         |
| GBD world regions      | 16         | 1         |

#### Symptomatic episodes of gastritis and duodenitis

|                        | Prevalence | Incidence |
|------------------------|------------|-----------|
| Studies                | 0          | 49        |
| Countries              |            |           |
| Countries/subnationals | 0          | 143       |
| GBD world regions      | 0          | 8         |

#### *Disability weights*

The basis of the GBD disability weight survey assessments are lay descriptions of sequelae highlighting major functional consequences and symptoms. For GBD 2016, we added the mild sequela for symptomatic episodes of gastritis with proportions of cases derived from the MEPS. The lay descriptions and disability weights for gastritis and duodenitis are shown below:

| Severity split                                          | Lay description                                                                                           | DW (95% CI)           |
|---------------------------------------------------------|-----------------------------------------------------------------------------------------------------------|-----------------------|
| Mild gastritis and duodenitis, symptomatic episodes     | This person has some pain in the belly that causes nausea but does not interfere with daily activities.   | 0.011 (0.005-0.021)   |
| Moderate gastritis and duodenitis, symptomatic episodes | This person has pain in the belly and feels nauseated. The person has difficulties with daily activities. | 0.114 (0.078 — 0.159) |

\*The numerous sequelae generated from exclusive combinations of anemia and gastritis each contain custom disability weights. More information can be found in the appendix detailing disability weights.

## **Modelling strategy**

The DisMod model for total gastritis and duodenitis included bounding remission from 0 to 1 (a minimum duration of one year). Reference data were from literature and our most complete US claims dataset (2012). We marked inpatient and other US claims years data with study-level covariates. We used the function in DisMod-MR 2.1 to pull in cause-specific mortality rate (CSMR) data from our CODEm and CODcorrect analyses and match with prevalence data points for the same geography. We calculated excess mortality rate to estimate priors by dividing CSMR by prevalence. We also applied a country-level



covariate for alcohol consumption to prevalence, which we forced positive with a lower bound of 0 and an upper bound of 2. Additionally, we applied lag-distributed income and healthcare access and quality index covariates to excess mortality, forced negative with an upper bound of 0 and a lower bound of -1. Betas and exponentiated values (which can be interpreted as an odds ratio) are shown in the tables below for study-level covariates and country-level covariates.

| Covariate type        | Covariate                           | Parameter             | beta                  | Exponentiated beta |
|-----------------------|-------------------------------------|-----------------------|-----------------------|--------------------|
| Study-level covariate | Hospital Inpatient                  | Prevalence            | -0.81 (-0.86 - -0.70) | 0.44 (0.42 - 0.50) |
| Study-level covariate | Outpatient                          | Prevalence            | -0.28 (-1.23 - 0.79)  | 0.76 (0.29 - 2.20) |
| Study-level covariate | Claims data - 2000                  | Prevalence            | 0.05 (0.01 - 0.09)    | 1.05 (1.01 - 1.09) |
| Study-level covariate | Claims data - 2010                  | Prevalence            | 0.23 (0.20 - 0.27)    | 1.26 (1.22 - 1.31) |
| Country covariate     | Alcohol (liters per capita)         | Prevalence            | 0.00 (0.00 - 0.00)    | 1.00 (1.00 - 1.00) |
| Country covariate     | LDI (I\$ per capita)                | Excess mortality rate | -0.14 (-0.17 - -0.12) | 0.87 (0.85 - 0.89) |
| Country covariate     | Healthcare access and quality index | Excess mortality rate | -0.07 (-0.07 - -0.07) | 0.93 (0.93 - 0.93) |

The symptomatic episodes of gastritis and duodenitis DisMod models bounded remission from 52 to 54 (a duration of about one week). We also assumed no incidence from 0 to 2 years old. The reference data were US claims data from 2012, and we marked other US claims years data and inpatient data with specific study-level covariates. We used the function in DisMod-MR 2.1 to pull in cause-specific mortality rate (CSMR) data from our CODEm and CODcorrect analyses and match with incidence data points for the same geography. We calculated excess mortality rate to estimate priors by dividing CSMR by incidence/remission. We also applied a country-level covariate for alcohol consumption to incidence, which we forced positive with a lower bound of 0 and an upper bound of 2. Additionally, we applied lag-distributed income and healthcare access and quality index covariates to excess mortality, forced negative with an upper bound of 0 and a lower bound of -1. Betas and exponentiated values (which can be interpreted as an odds ratio) are shown in the tables below for study-level covariates and country-level covariates.

| Covariate type        | Covariate                           | Parameter             | beta                  | Exponentiated beta |
|-----------------------|-------------------------------------|-----------------------|-----------------------|--------------------|
| Study-level covariate | Hospital Inpatient                  | Incidence             | -1.00 (-1.00 - -0.99) | 0.37 (0.37 - 0.37) |
| Study-level covariate | Claims data - 2000                  | Incidence             | 0.01 (-0.03 - 0.05)   | 1.01 (0.97 - 1.05) |
| Study-level covariate | Claims data - 2010                  | Incidence             | 0.19 (0.16 - 0.22)    | 1.21 (1.17 - 1.25) |
| Country covariate     | Alcohol (liters per capita)         | Incidence             | 0.00 (0.00 - 0.01)    | 1.00 (1.00 - 1.01) |
| Country covariate     | LDI (I\$ per capita)                | Excess mortality rate | -0.14 (-0.16 - -0.12) | 0.87 (0.85 - 0.89) |
| Country covariate     | Healthcare access and quality index | Excess mortality rate | -0.04 (-0.04 - -0.03) | 0.96 (0.96 - 0.97) |

To calculate prevalence of asymptomatic gastritis and duodenitis, we took the estimated prevalence of symptomatic episodes, and subtracted it from our estimated prevalence of total gastritis and duodenitis. Methods for causal attribution of anemia due to gastritis can be found elsewhere in the appendix

detailing strategies for impairments. Each final combination of sequela of anemia and gastritis underwent exclusivity adjustments to prevent double counting.

# Appendicitis

## Flowchart

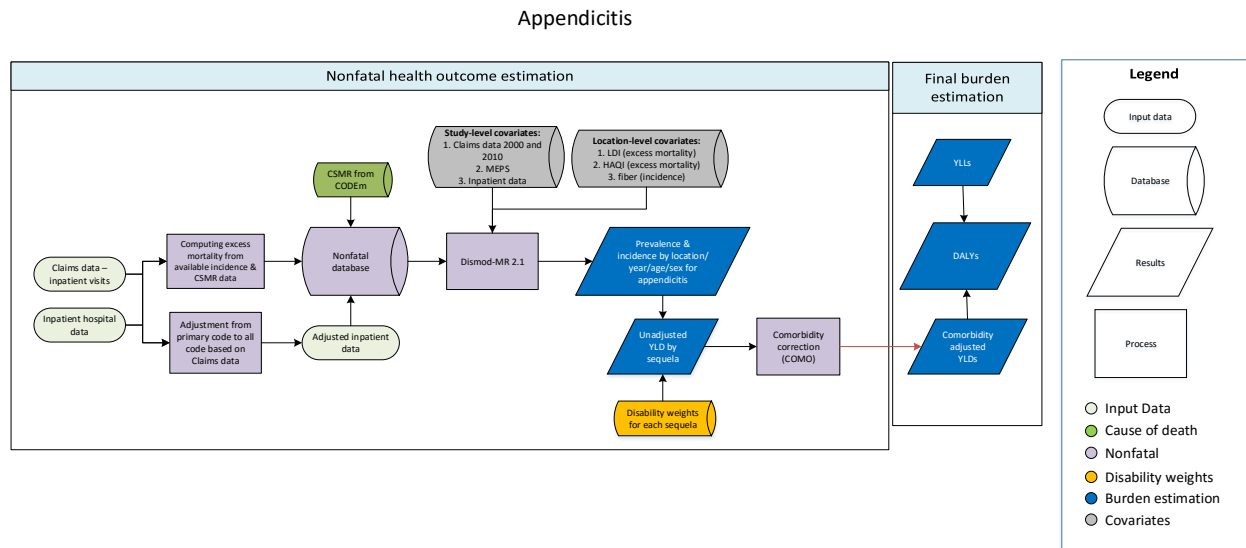

## Case definition

Appendicitis is an inflammation of the appendix that causes nausea, vomiting, and sharp pain in the right lower abdomen. Appendicitis requires surgery, or septic shock may set in and the patient will be at risk for severe complications, including sepsis and death. ICD-10 codes included are K35-K35.3, K35.8, K35.80, K35.89, K35.9, K36, K36.0, K37, K37.0, K37.9, and K38.3.

## Input data

### Model inputs

Since GBD 2010, the data used for appendicitis are hospital inpatient data across 103 separate locations and US claims data for 2000, 2010, and 2012 by US state, primary diagnoses only. Descriptions of search strategies for hospital and claims data are included elsewhere in the appendix. The agreed-upon approach for appendicitis was to rely primarily on these data sources and not conduct a formal literature review. Data were outliered or excluded if we found them unreasonable when compared to regional, super-regional, and global rates.

**Table 1. Data inputs (not including hospital inpatient data)**

|                        | Prevalence | Incidence |
|------------------------|------------|-----------|
| Studies                | 0          | 3         |
| Countries/subnationals | 0          | 319       |
| Countries              | 0          | 40        |
| GBD world regions      | 0          | 15        |
| GBD super-regions      | 0          | 7         |

### Severity splits

The basis of the GBD disability weight survey assessments are lay descriptions of sequelae highlighting major functional consequences and symptoms.

**Table 2. Severity level and lay description.**

| Severity split       | Lay description                                                                                                               | DW (95% CI)         |
|----------------------|-------------------------------------------------------------------------------------------------------------------------------|---------------------|
| Appendicitis, severe | This person has severe pain in the belly and feels nauseated. The person is anxious and unable to carry out daily activities. | 0.324 (0.219–0.442) |

### Modelling strategy

DisMod-MR 2.1, a Bayesian meta-regression tool, was used to estimate appendicitis prevalence by age, sex, year, and geography (subnational [select countries], country, region, super-region). Prior settings in the DisMod model included bounding remission from 25 to 27 (a duration of about two weeks) for all age groups and capping excess mortality at 0.31. We used study-level covariates to adjust incidence derived from MEPS, and US claims data for 2000 and 2010 toward the level of other incidence data points, which were more representative of the general population.

We used the function in DisMod-MR 2.1 to pull in cause-specific mortality rate (CSMR) data from our CODEm and CODcorrect analyses and match with prevalence data points for the same geography. We calculated excess mortality rate to estimate priors by dividing CSMR by prevalence. We also applied a fiber (g per day) country-level covariate to incidence, forcing a positive relationship with a lower bound of 0. A lag-distributed income (LDI) covariate was applied to excess mortality, log-transformed and forced negative with an upper bound of -0.1 and a lower bound of 0. Similarly, a health care access and quality index (HAQI) covariate was also forced negative (-2, 0) on excess mortality.

Betas and exponentiated values (which can be interpreted as an odds ratio) are shown in the tables below for study-level covariates and country-level covariates:

**Table 3. Study-level beta and exponentiated values**

| Covariate                               | Parameter | beta                  | Exponentiated beta |
|-----------------------------------------|-----------|-----------------------|--------------------|
| MEPS                                    | Incidence | 0.43 (0.14 - 0.72)    | 1.53 (1.15 - 2.06) |
| inpatient-only<br>Marketscan, year 2000 | Incidence | -0.13 (-0.18 - -0.10) | 0.88 (0.84 - 0.91) |
| inpatient-only<br>Marketscan, year 2010 | Incidence | -0.06 (-0.10 - -0.02) | 0.94 (0.91 - 0.98) |

**Table 4. Location-level beta and exponentiated values**

| Covariate            | Parameter             | beta                  | Exponentiated beta |
|----------------------|-----------------------|-----------------------|--------------------|
| fiber adjusted(g)    | Incidence             | -0.04 (-0.05 - -0.04) | 0.96 (0.95 - 0.96) |
| LDI (I\$ per capita) | Excess mortality rate | -0.00 (-0.00 - -0.00) | 1.00 (1.00 - 1.00) |

|                                     |                       |                       |                    |
|-------------------------------------|-----------------------|-----------------------|--------------------|
| Healthcare access and quality index | Excess mortality rate | -0.00 (-0.00 - -0.00) | 1.00 (1.00 - 1.00) |
|-------------------------------------|-----------------------|-----------------------|--------------------|

# Paralytic Ileus and Intestinal Obstruction

## Flowchart

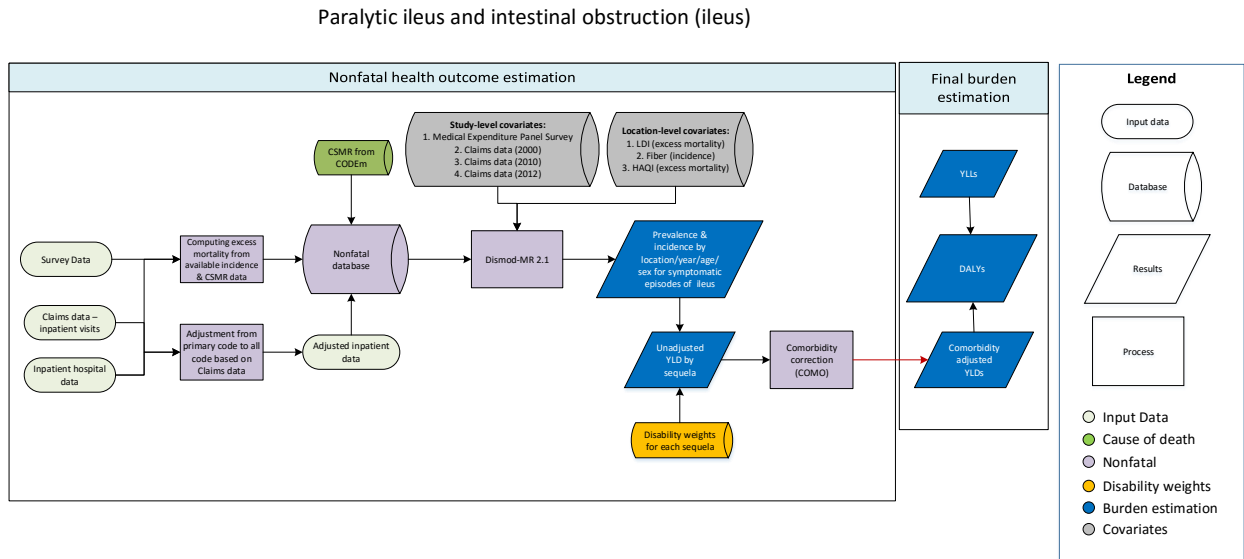

## Case definition

Paralytic ileus and intestinal obstruction is a lack of digestive propulsion caused by failed peristalsis, typically requiring surgery. ICD code for paralytic ileus and intestinal obstruction is K56.

## Input data

### Model inputs

Since GBD 2010, the data used for paralytic ileus and intestinal obstruction have been hospital inpatient data and US claims data for 2000, 2010, and 2012 by US state, primary diagnoses only. Descriptions of search strategies for hospital and claims data are included elsewhere in the appendix. The agreed-upon approach for paralytic ileus and intestinal obstruction was to only use these data sources, and not conduct a literature review. Data were outliered or excluded if we found them unreasonable when compared to regional, super-regional, and global rates.

**Table 1. Model inputs (not including hospital inpatient data)**

|                        | Prevalence | Incidence |
|------------------------|------------|-----------|
| Studies                | 0          | 4         |
| Countries/subnationals | 0          | 347       |
| Countries              | 0          | 42        |
| GBD world regions      | 0          | 16        |
| GBD super-regions      | 0          | 7         |

### Severity splits

The basis of the GBD disability weight survey assessments is lay descriptions of sequelae highlighting major functional consequences and symptoms.

**Table 2. Severity level and lay description.**

| Severity level                                     | Lay description                                                                                                               | DW (95% CI)         |
|----------------------------------------------------|-------------------------------------------------------------------------------------------------------------------------------|---------------------|
| Paralytic ileus and intestinal obstruction, severe | This person has severe pain in the belly and feels nauseated. The person is anxious and unable to carry out daily activities. | 0.324 (0.219–0.442) |

## Modelling strategy

DisMod-MR 2.1, a Bayesian meta-regression tool, was used to estimate paralytic ileus and intestinal obstruction prevalence by age, sex, year, and geography (subnational [select countries], country, region, super-region).

Paralytic ileus and intestinal obstruction was modelled with remission set between 25 and 26 for all age groups, implying a duration of approximately two weeks. We also set a prior for the maximum incidence of 0.002 for ages 0 to 5. The reference data were hospital inpatient data, primary diagnosis only. Study-level covariates were used to adjust incidence derived from the Medical Expenditure Panel Survey (MEPS) and US claims data for 2000, 2010, and 2012 toward the levels in hospital inpatient data.

We used the function in DisMod-MR 2.1 to pull in cause-specific mortality rate (CSMR) data from our CODEm and CODcorrect analyses and match with incidence data points for the same geography. We calculated the excess mortality rate to estimate priors by dividing CSMR by incidence/remission. We also applied location-level covariates: fibre consumption to incidence with an upper bound of 0 and a lower bound of -2, a lag-distributed income covariate to excess mortality, log-transformed and forced negative with an upper bound of 0 and a lower bound of -1, and a health care access and quality index (HAQI) covariate with an upper bound of 0 and lower bound of -2.

Betas and exponentiated values (which can be interpreted as an odds ratio) are shown in the tables below for study-level covariates and country-level covariates:

**Table 3. Study-level beta and exponentiated values**

| Covariate                            | Parameter | beta                | Exponentiated beta |
|--------------------------------------|-----------|---------------------|--------------------|
| MEPS                                 | Incidence | 0.05 (-0.18 - 0.28) | 1.05 (0.84 - 1.32) |
| inpatient-only Marketscan, year 2000 | Incidence | 0.27 (0.22 - 0.31)  | 1.30 (1.25 - 1.36) |
| inpatient-only Marketscan, year 2010 | Incidence | 0.63 (0.59 - 0.66)  | 1.88 (1.81 - 1.94) |
| inpatient-only Marketscan, year 2012 | Incidence | 0.60 (0.56 - 0.64)  | 1.82 (1.76 - 1.89) |

**Table 4. Location-level beta and exponentiated values**

| Covariate            | Parameter             | beta                  | Exponentiated beta |
|----------------------|-----------------------|-----------------------|--------------------|
| fiber adjusted(g)    | Incidence             | -0.01 (-0.03 - -0.00) | 0.99 (0.97 - 1.00) |
| LDI (I\$ per capita) | Excess mortality rate | -0.23 (-0.25 - -0.20) | 0.80 (0.78 - 0.82) |

|                                     |                       |                       |                    |
|-------------------------------------|-----------------------|-----------------------|--------------------|
| Healthcare access and quality index | Excess mortality rate | -0.02 (-0.02 - -0.02) | 0.98 (0.98 - 0.98) |
|-------------------------------------|-----------------------|-----------------------|--------------------|



# Inguinal, femoral and abdominal hernias

## Flowchart

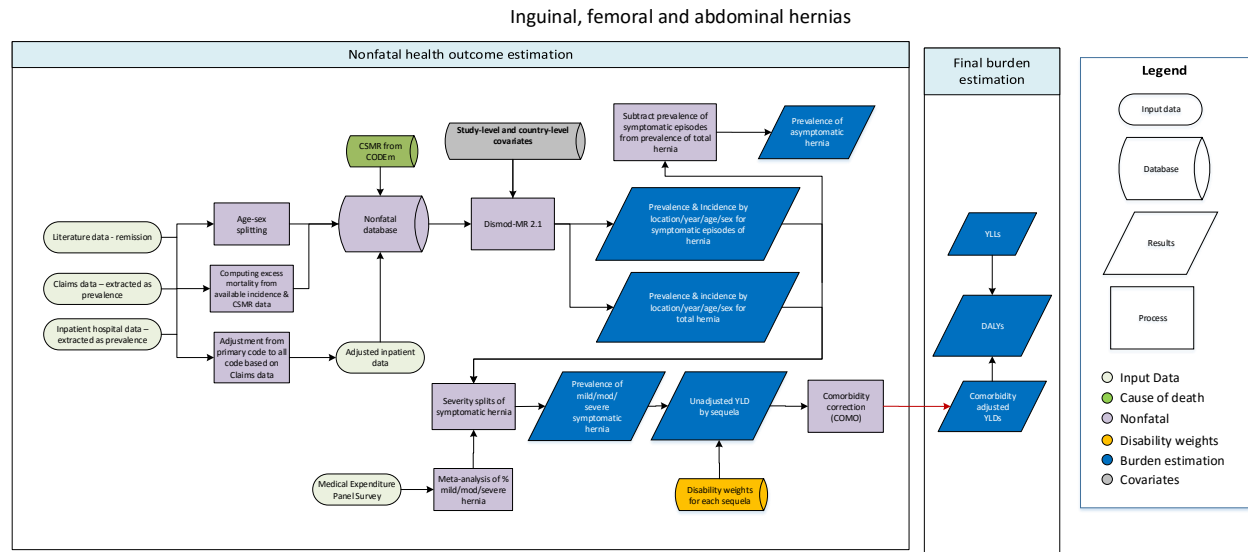

## Flowchart

## Case definition

A hernia is a digestive disorder that occurs when an internal organ protrudes through an opening in the tissue that holds it in place. Hernias most commonly occur in the inner and outer groin, and in the abdomen, and require surgical intervention. However, it can take several months before surgery occurs, resulting in a chronic condition. ICD codes used are K40, K41, K42, K44, K45, and K46.

## Input data

### Model inputs

For GBD 2010 and 2013, the data used for hernias were hospital inpatient data extracted as prevalence and remission data calculated based off a regression from a paper describing mean wait times for elective surgery in OECD countries. For GBD 2016, we use the same data, but only included regression results for OECD countries. We also included US claims data for 2000, 2010, and 2012 by US state. The agreed-upon approach for hernias was to use only these data sources, and not conduct a literature review. For GBD 2016, we renamed chronic inguinal, femoral, and abdominal hernias to total inguinal, femoral, and abdominal hernias.

In GBD 2016 we created a new database and model for inguinal, femoral and abdominal hernias, symptomatic episodes, which models prevalence and incidence of symptomatic episodes within inpatient settings as a primary diagnosis. The input data for the symptomatic database include the hospital inpatient data (primary diagnoses only) extracted as prevalence, US claims data (inpatient only) for 2000, 2010, and 2012, and the remission data on elective surgery wait times described above.

Data were outliered or excluded if we found them unreasonable when compared to regional, super-regional, and global rates.

The tables below show the number of studies included in GBD 2016, as well as the number of countries or subnational units and GBD world regions represented. These numbers reflect both the total and symptomatic databases.

Total inguinal, femoral, and abdominal hernias

|                        | Prevalence | Incidence | Remission |
|------------------------|------------|-----------|-----------|
| Studies                | 0          | 0         | 1         |
| Countries              | 39         | 0         | 33        |
| Countries/subnationals | 329        | 0         | 33        |
| GBD world regions      | 7          | 0         | 4         |

Inguinal, femoral, and abdominal hernias, symptomatic episodes

|                        | Prevalence | Incidence | Remission |
|------------------------|------------|-----------|-----------|
| Studies                | 0          | 0         | 1         |
| Countries              | 40         | 0         | 33        |
| Countries/subnationals | 332        | 0         | 33        |
| GBD world regions      | 7          | 0         | 4         |

*Disability weights*

The basis of the GBD disability weight survey assessments are lay descriptions of sequelae highlighting major functional consequences and symptoms. For GBD 2016, we added moderate and severe sequela to prevalent cases of symptomatic hernias. The lay descriptions and disability weights for inguinal, abdominal, and femoral hernias are shown below:

| Severity split                                                         | Lay description                                                                                                               | DW (95% CI)         |
|------------------------------------------------------------------------|-------------------------------------------------------------------------------------------------------------------------------|---------------------|
| Mild Inguinal, abdominal, and femoral hernia, symptomatic episodes     | This person has some pain in the belly that causes nausea but does not interfere with daily activities.                       | 0.011 (0.005-0.021) |
| Moderate Inguinal, abdominal, and femoral hernia, symptomatic episodes | This person has pain in the belly and feels nauseous. The person has difficulties with daily activities.                      | 0.114 (0.080-0.159) |
| Severe Inguinal, abdominal, and femoral hernia, symptomatic episodes   | This person has severe pain in the belly and feels nauseated. The person is anxious and unable to carry out daily activities. | 0.324 (0.219-0.442) |

## Modelling strategy

We modelled total hernia and symptomatic hernia using separate DisMod models, informed by prevalence and incidence data from hospital and US claims data, paired with the calculated remission from the regression described in Siciliani et al<sup>1</sup>. Priors were set with a maximum incidence of 0.02 for ages 0 to 4, and bounds on remission from 0 to 5 (a minimum duration of about ten weeks) – we also assumed prevalence at birth due to umbilical hernias. Reference data were US claims data from 2012, and we marked inpatient hospital data and the remaining years of US claims data with separate study-level covariates. We used the function in DisMod-MR 2.1 to pull in cause-specific mortality rate (CSMR) data from our CODEm and CoDcorrect analyses and match with incidence data points for the same geography. We calculated excess mortality rate to estimate priors by dividing CSMR by incidence/remission. We also applied a lag-distributed income covariate to both remission and excess mortality, log transformed. We forced this covariate negative for excess mortality (bounds from -1 to 0), and positive for remission (bounds from 0.5 to 2). Betas and exponentiated values (which can be interpreted as an odds ratio) are shown in the tables below for study-level covariates and country-level covariates.

### Total inguinal, femoral, and abdominal hernias

| Covariate type        | Covariate            | Parameter             | beta                  | Exponentiated beta |
|-----------------------|----------------------|-----------------------|-----------------------|--------------------|
| Study-level covariate | Hospital Inpatient   | Prevalence            | -2.02 (-2.06 - -2.00) | 0.13 (0.13 - 0.14) |
| Study-level covariate | Claims data - 2000   | Prevalence            | -0.37 (-0.41 - -0.33) | 0.69 (0.67 - 0.72) |
| Study-level covariate | Claims data - 2010   | Prevalence            | -0.06 (-0.08 - -0.03) | 0.95 (0.92 - 0.97) |
| Country covariate     | LDI (I\$ per capita) | Excess mortality rate | 1.01 (0.90 - 1.11)    | 2.74 (2.45 - 3.04) |
| Country covariate     | LDI (I\$ per capita) | Excess mortality rate | -0.00 (-0.00 - -0.00) | 1.00 (1.00 - 1.00) |

### Inguinal, femoral, and abdominal hernias, symptomatic episodes

| Covariate type        | Covariate            | Parameter             | beta                  | Exponentiated beta |
|-----------------------|----------------------|-----------------------|-----------------------|--------------------|
| Study-level covariate | Hospital Inpatient   | Prevalence            | -1.28 (-1.30 - -1.25) | 0.28 (0.27 - 0.29) |
| Study-level covariate | Claims data - 2000   | Prevalence            | -0.68 (-0.70 - -0.65) | 0.51 (0.50 - 0.52) |
| Country covariate     | LDI (I\$ per capita) | Excess mortality rate | 0.85 (0.51 - 0.98)    | 2.34 (1.66 - 2.66) |
| Country covariate     | LDI (I\$ per capita) | Excess mortality rate | -0.00 (-0.00 - -0.00) | 1.00 (1.00 - 1.00) |

We calculated prevalence of asymptomatic hernias by subtracting the estimated prevalence of symptomatic hernias from our estimated prevalence of total hernias.

# Inflammatory Bowel Disease

## Flowchart

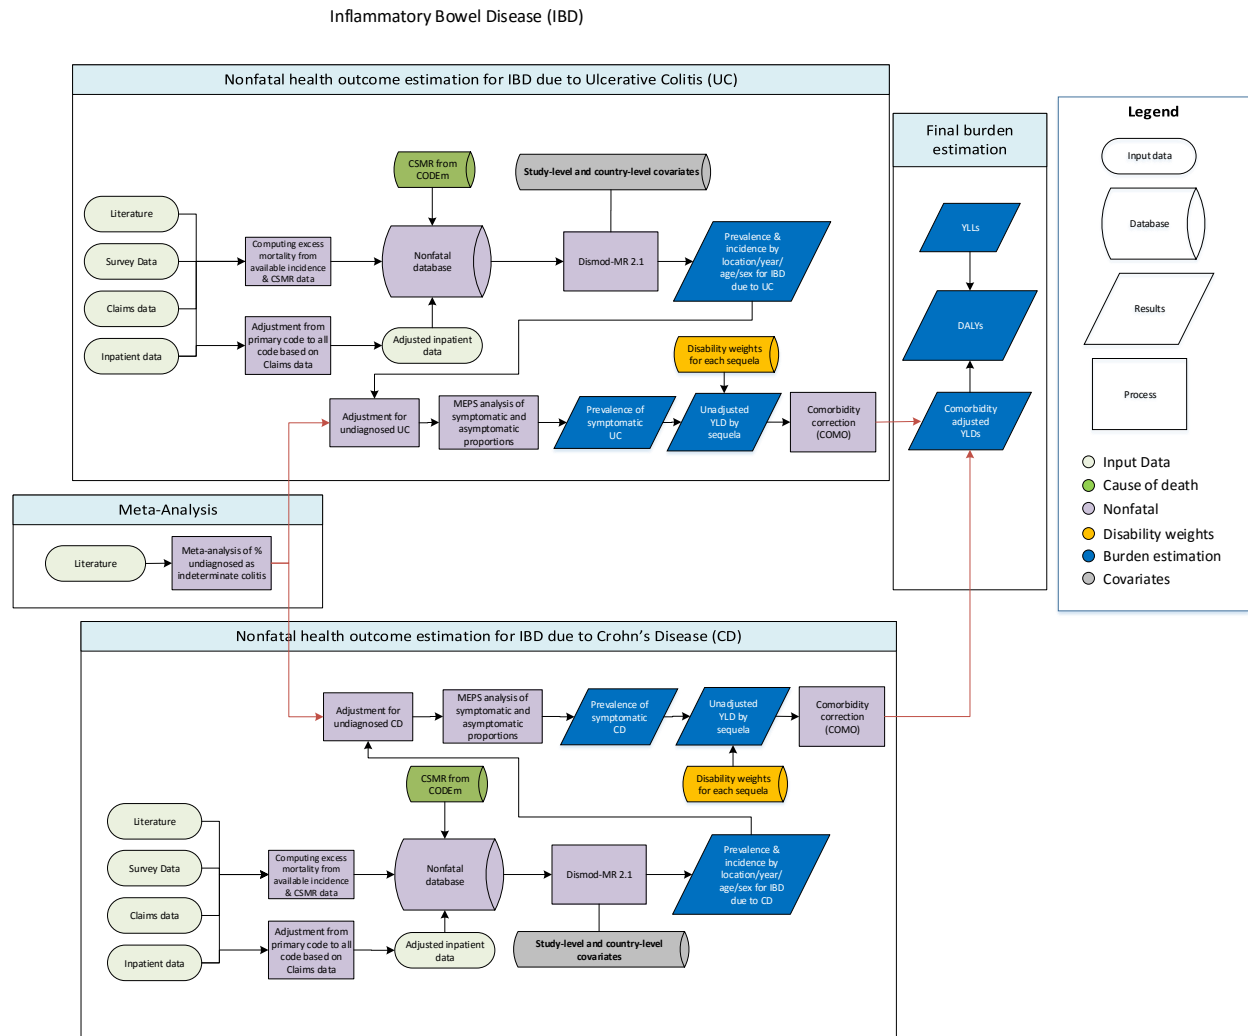

## Case definition

Inflammatory bowel disease is a type of digestive disorder involving inflammation of the colon and gastrointestinal tract, most commonly classified as Crohn's disease (inflammation of the small and large intestine) and ulcerative colitis (inflammation of the colon and rectum). In a significant proportion of cases of inflammatory bowel disease, neither Crohn's disease nor ulcerative colitis is definitively the diagnosis, and a diagnosis of indeterminate colitis is applied. ICD codes are K50 for Crohn's disease, K51 for ulcerative colitis, and K52 for indeterminate colitis.

## Input data

### *Model inputs*

Data inputs were separate for ulcerative colitis and Crohn's disease, but a single systematic review of literature was conducted to capture studies of prevalence and incidence for all inflammatory bowel diseases for GBD 2016. Studies were excluded if they were not representative of the national population, or if they had insufficient study and sampling methods. Reviews were excluded from the search results. In addition to literature data, we included US claims data from 2000, 2010, and 2012 at the US state level, extracted as prevalence. For GBD 2016 we included inpatient hospital data as model inputs. Data were outliered or excluded if we found them unreasonable when compared to regional, super-regional, and global rates.

The tables below show the number of studies included in GBD 2016, as well as the number of countries or subnational units and GBD world regions represented.

### Noninfective inflammatory bowel disease due to ulcerative colitis

|                        | Prevalence | Incidence |
|------------------------|------------|-----------|
| Studies                | 15         | 98        |
| Countries              | 41         | 52        |
| Countries/subnationals | 286        | 61        |
| GBD world regions      | 7          | 6         |

### Noninfective inflammatory bowel disease due to Crohn's disease

|                        | Prevalence | Incidence |
|------------------------|------------|-----------|
| Studies                | 17         | 84        |
| Countries              | 46         | 47        |
| Countries/subnationals | 292        | 55        |
| GBD world regions      | 7          | 5         |

### *Disability weights*

The basis of the GBD disability weight survey assessments are lay descriptions of sequelae highlighting major functional consequences and symptoms. For GBD 2016, we used the MEPS to find the proportion of asymptomatic prevalence for both ulcerative colitis and crohn's disease. The lay descriptions and disability weights for sequelae associated with inflammatory bowel disease are shown below, and are applied to symptomatic cases only:

| Severity split               | Lay description                                                                                                                                                                                           | DW (95% CI)        |
|------------------------------|-----------------------------------------------------------------------------------------------------------------------------------------------------------------------------------------------------------|--------------------|
| Crohn's disease, symptomatic | This person has cramping abdominal pain, has diarrhea several times a day, and feels very tired for two months every year. When the person does not have symptoms, there is anxiety about them returning. | 0.231 (0.156-0.32) |

|                                 |                                                                                                                                                                                                           |                    |
|---------------------------------|-----------------------------------------------------------------------------------------------------------------------------------------------------------------------------------------------------------|--------------------|
| Ulcerative colitis, symptomatic | This person has cramping abdominal pain, has diarrhea several times a day, and feels very tired for two months every year. When the person does not have symptoms, there is anxiety about them returning. | 0.231 (0.156-0.32) |
|---------------------------------|-----------------------------------------------------------------------------------------------------------------------------------------------------------------------------------------------------------|--------------------|

## Modeling strategy

The modelling strategy for all inflammatory bowel disease encompasses separate DisMod models for ulcerative colitis and Crohn’s disease, which are then adjusted to account for inflammatory bowel disease due to indeterminate colitis.

The DisMod model for ulcerative colitis included setting remission to 0 for all age groups and setting incidence to 0 for ages 0 to 1. Reference data were US claims data from 2012, and we marked hospital inpatient, literature, and the remaining years of US claims data with separate study-level covariates. We used lag-distributed income (log-transformed) and healthcare access and quality index country level covariates on excess mortality (forced negative) to further inform the model. We applied a country-level covariate of absolute value of average latitude to prevalence, and a ln-ASDR (age standardized death rate) fixed effect on prevalence. The ASDR data are taken from our CODEm and CODcorrect analyses for all inflammatory bowel disease. Betas and exponentiated values (which can be interpreted as an odds ratio) are shown in the tables below for study-level covariates and country-level covariates.

| Covariate type        | Covariate                           | Parameter             | beta                  | Exponentiated beta |
|-----------------------|-------------------------------------|-----------------------|-----------------------|--------------------|
| Study-level covariate | Hospital Inpatient                  | Prevalence            | 0.40 (0.40 - 0.40)    | 1.49 (1.49 - 1.49) |
| Study-level covariate | MEPS                                | Prevalence            | -0.01 (-0.02 - -0.00) | 0.99 (0.98 - 1.00) |
| Study-level covariate | Literature                          | Prevalence            | -0.00 (-0.01 - -0.00) | 1.00 (0.99 - 1.00) |
| Study-level covariate | Claims data - 2000                  | Prevalence            | -0.00 (-0.01 - -0.00) | 1.00 (0.99 - 1.00) |
| Study-level covariate | Claims data - 2010                  | Prevalence            | -0.00 (-0.00 - -0.00) | 1.00 (1.00 - 1.00) |
| Country covariate     | Absolute value of average latitude  | Prevalence            | 0.05 (0.05 - 0.06)    | 1.06 (1.06 - 1.06) |
| Country covariate     | LDI (I\$ per capita)                | Excess mortality rate | -0.50 (-1.00 - -0.02) | 0.61 (0.37 - 0.98) |
| Country covariate     | Healthcare access and quality index | Excess mortality rate | -0.50 (-1.00 - 0.00)  | 0.61 (0.37 - 1.00) |

The DisMod model for Crohn’s disease included setting remission to 0 for all age groups and setting incidence to 0 for ages 0 to 2. Reference data were US claims data from 2012 and inpatient data. We marked literature, MEPS, and the remaining years of US claims data with specific study-level covariates. We used lag-distributed income (log-transformed) and healthcare access and quality index country level covariates on excess mortality (forced negative) to further inform the model. We applied a country-level ln-ASDR (age standardized death rate) fixed effect on prevalence. The ASDR data are taken from our CODEm and COD correct analyses for all inflammatory bowel disease. Betas and exponentiated values (which can be interpreted as an odds ratio) are shown in the tables below for study-level covariates and country-level covariates.

| <b>Covariate type</b> | <b>Covariate</b>                    | <b>Parameter</b>      | <b>beta</b>           | <b>Exponentiated beta</b> |
|-----------------------|-------------------------------------|-----------------------|-----------------------|---------------------------|
| Study-level covariate | MEPS                                | Prevalence            | -0.01 (-0.04 - -0.00) | 0.99 (0.96 - 1.00)        |
| Study-level covariate | Literature                          | Prevalence            | -0.00 (-0.01 - -0.00) | 1.00 (0.99 - 1.00)        |
| Study-level covariate | Claims data - 2000                  | Prevalence            | -0.00 (-0.00 - -0.00) | 1.00 (1.00 - 1.00)        |
| Study-level covariate | Claims data - 2010                  | Prevalence            | -0.00 (-0.00 - -0.00) | 1.00 (1.00 - 1.00)        |
| Country covariate     | LDI (I\$ per capita)                | Excess mortality rate | -0.47 (-0.97 - -0.02) | 0.62 (0.38 - 0.98)        |
| Country covariate     | Healthcare access and quality index | Excess mortality rate | -0.17 (-0.23 - -0.10) | 0.84 (0.79 - 0.91)        |

We conducted a meta-analysis to calculate the ratio of inflammatory bowel disease cases that are categorized as indeterminate colitis to cases that are characterized as either Crohn's disease or ulcerative colitis. The results of this meta-analysis were a mean ratio of 0.059 (0.047-0.071). We then took the prevalence results of the DisMod models for ulcerative colitis and Crohn's disease and adjusted them by multiplying by a normal distribution of draws from 1.059 (1.047-1.071) to encompass all inflammatory bowel disease cases.

# Vascular Intestinal Disorders

## Flowchart

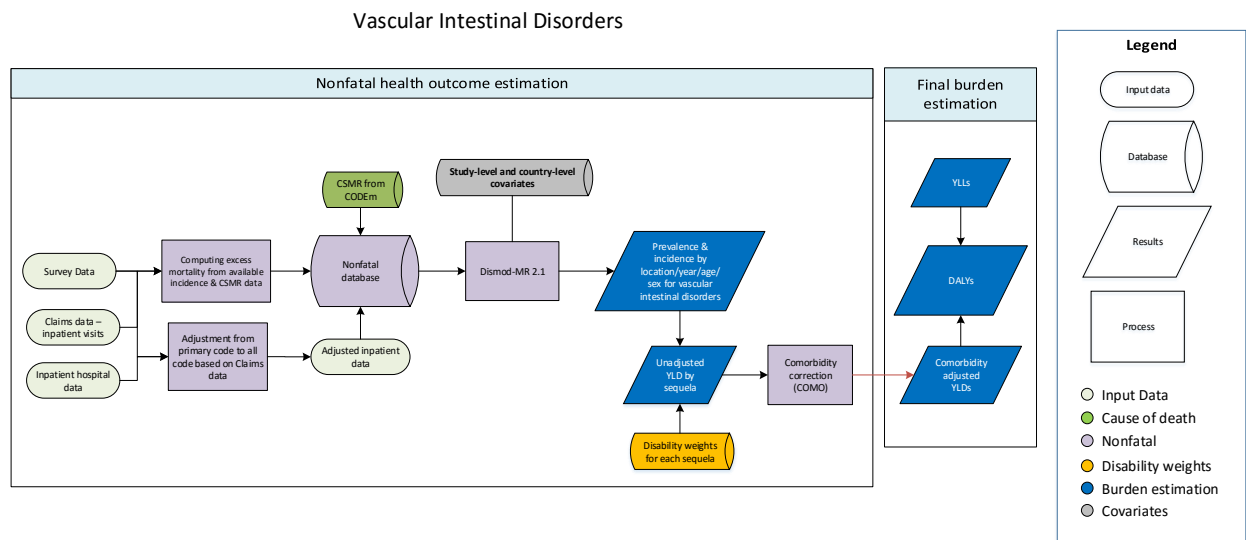

## Input data and methodological summary

### Case definition

Vascular intestinal disorder, also known as intestinal ischemia, occurs when there is decreased blood supply to the gastrointestinal tract causing injury to the bowel. Vascular intestinal disorders typically require surgery. The ICD code for vascular intestinal disorders is K55.

### Input data

#### Model inputs

For GBD 2016, the data used for vascular intestinal disorders are hospital inpatient data and US claims data for 2000, 2010, and 2012 by US state, primary diagnoses only. Descriptions of search strategies for hospital and claims data are included elsewhere in the appendix. The agreed-upon approach for vascular intestinal disorders was to use only these data sources and not conduct a literature review. Data were outliered or excluded if we found them unreasonable when compared to regional, super-regional, and global rates.

The table below shows the number of literature studies included in GBD 2016, as well as the number of countries or subnational units and GBD world regions represented.

Table 1. Data inputs



|                        |           |
|------------------------|-----------|
|                        | Incidence |
| Studies                | 0         |
| Countries              | 11        |
| Countries/subnationals | 97        |
| GBD world regions      | 5         |

### Disability weights

The basis of the GBD disability weight survey assessments are lay descriptions of sequelae highlighting major functional consequences and symptoms. The lay descriptions and disability weights for vascular intestinal disorders are shown below:

**Table 2. Severity level and lay descriptions**

| Severity split                        | Lay description                                                                                                               | DW (95% CI)         |
|---------------------------------------|-------------------------------------------------------------------------------------------------------------------------------|---------------------|
| Vascular intestinal disorders, severe | This person has severe pain in the belly and feels nauseated. The person is anxious and unable to carry out daily activities. | 0.324 (0.219-0.442) |

### Modelling strategy

Prior settings in the DisMod model included bounding remission from 2 to 12 (a duration from about four weeks to half a year) for all age groups and capping excess mortality at 10. The reference data were US claims data from year 2012, primary diagnosis only, and we marked inpatient US claims data years 2000 and 2010, and hospital inpatient data with separate study-level covariates.

We used the function in DisMod-MR 2.1 to pull in cause-specific mortality rate (CSMR) data from our CODEm and CoDcorrect analyses and match with incidence data points for the same geography. We calculated excess mortality rate to estimate priors by dividing CSMR by incidence/remission. We also applied a lag-distributed income covariate (log transformed) and healthcare access and quality index covariate to excess mortality, forced negative with an upper bound of 0 and a lower bound of -1.

Betas and exponentiated values (which can be interpreted as an odds ratio) are shown in the tables below for study-level covariates and country-level covariates:

**Table 3. Study covariate**

| Covariate type        | Covariate                            | Parameter | beta                  | Exponentiated beta |
|-----------------------|--------------------------------------|-----------|-----------------------|--------------------|
| Study-level covariate | Hospital Inpatient                   | Incidence | 0.29 (0.21 - 0.34)    | 1.33 (1.24 - 1.40) |
| Study-level covariate | inpatient-only Marketscan, year 2000 | Incidence | -0.56 (-0.61 - -0.51) | 0.57 (0.54 - 0.60) |

|                       |                                      |                       |                       |                    |
|-----------------------|--------------------------------------|-----------------------|-----------------------|--------------------|
| Study-level covariate | inpatient-only Marketscan, year 2010 | Incidence             | 0.01 (-0.04 - 0.05)   | 1.01 (0.96 - 1.05) |
| Country covariate     | LDI (I\$ per capita)                 | Excess mortality rate | -0.43 (-0.51 - -0.35) | 0.65 (0.60 - 0.70) |
| Country covariate     | Healthcare access and quality index  | Excess mortality rate | -0.03 (-0.04 - -0.03) | 0.97 (0.96 - 0.97) |

# Gallbladder and Biliary Diseases

## Flowchart

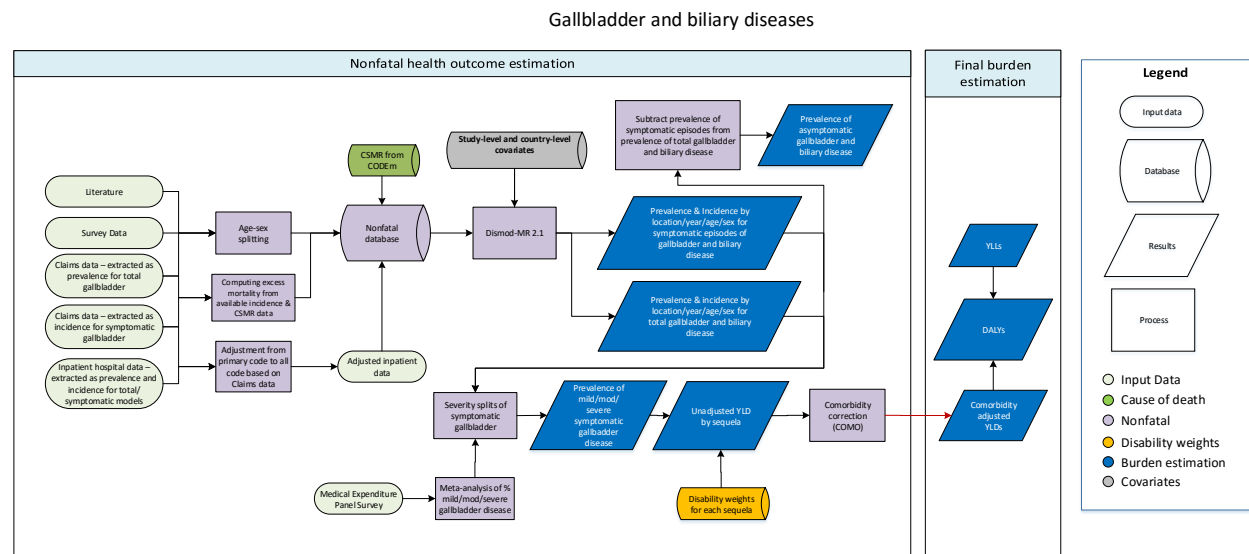

## Input data and methodological summary

### Case definition

Gallbladder and biliary diseases are digestive disorders including gallstones, cholecystitis, cholangitis, and other diseases of the gallbladder and biliary tract. Cholecystitis is an inflammation of the gallbladder, and cholangitis is an infection or inflammation of the bile duct, the result of a bacterial infection – both are often the result of gallstones. Gallbladder and biliary diseases, especially the presence of gallstones, can often be asymptomatic with periodic symptomatic episodes of severe abdominal pain, nausea, vomiting, and at times fever. ICD codes included are K80, K81, K82, and K83.

### Input data

#### Model inputs

For GBD 2016, we renamed chronic gallbladder and biliary diseases to total gallbladder and biliary diseases (total gallbladder disease). Data inputs were separate for the total gallbladder disease and symptomatic episode models. A systematic review of literature was conducted to capture studies of prevalence and incidence of gallbladder and biliary diseases. For GBD 2016, we performed a systematic literature search using PubMed. Studies not representative of the national population (ie. *H. Pylori* cohorts, patients presenting with pain), studies without sufficient information on study and sampling methods, and reviews were excluded. In addition to literature data, we included hospital inpatient and US claims data from 2000, 2010, and 2012 at the US state level, extracted as prevalence for the total gallbladder model, and extracted an incident case for the symptomatic gallbladder model. Data were

outliered or excluded if we found them unreasonable when compared to regional, super-regional, and global rates.

The tables below show the number of studies included in GBD 2016, as well as the number of countries or subnational units and GBD world regions represented.

#### Total gallbladder and biliary diseases

|                        | Prevalence | Incidence |
|------------------------|------------|-----------|
| Studies                | 28         | 2         |
| Countries              | 45         | 2         |
| Countries/subnationals | 307        | 2         |
| GBD world regions      | 7          | 2         |

#### Symptomatic episodes of gallbladder and biliary diseases

|                        | Prevalence | Incidence |
|------------------------|------------|-----------|
| Studies                | 1          | 1         |
| Countries              | 1          | 38        |
| Countries/subnationals | 1          | 320       |
| GBD world regions      | 1          | 6         |

#### *Disability weights*

The basis of the GBD disability weight survey assessments are lay descriptions of sequelae highlighting major functional consequences and symptoms. For GBD 2016, we included the mild and severe sequela and applied the disability weights to prevalent cases in the symptomatic gallbladder model. The lay descriptions and disability weights for gallbladder and biliary disease are shown below:

| Severity split                                                 | Lay description                                                                                                               | DW (95% CI)         |
|----------------------------------------------------------------|-------------------------------------------------------------------------------------------------------------------------------|---------------------|
| Mild gallbladder and biliary disease, symptomatic episodes     | This person has some pain in the belly that causes nausea but does not interfere with daily activities.                       | 0.011 (0.005-0.021) |
| Moderate gallbladder and biliary disease, symptomatic episodes | This person has pain in the belly and feels nauseous. The person has difficulties with daily activities.                      | 0.114 (0.080-0.159) |
| Severe gallbladder and biliary disease, symptomatic episodes   | This person has severe pain in the belly and feels nauseated. The person is anxious and unable to carry out daily activities. | 0.324 (0.219-0.442) |

#### **Modelling strategy**

The DisMod model for total gallbladder and biliary diseases included bounding remission from 0 to 1 (a minimum duration of one year). Reference data were from literature and US claims data year 2012, and we marked inpatient hospital and US claims data years 2000 and 2010 with separate year-specific study-

level covariates. We used the function in DisMod-MR 2.1 to pull in cause-specific mortality rate (CSMR) data from our CODEm and CODcorrect analyses and match with prevalence data points for the same geography. We calculated excess mortality rate to estimate priors by dividing CSMR by prevalence. We also applied a lag-distributed income covariate to excess mortality, log transformed and forced negative with an upper bound of 0 and a lower bound of -1. Betas and exponentiated values (which can be interpreted as an odds ratio) are shown in the tables below for study-level covariates and country-level covariates.

| <b>Covariate type</b> | <b>Covariate</b>     | <b>Parameter</b>      | <b>beta</b>           | <b>Exponentiated beta</b> |
|-----------------------|----------------------|-----------------------|-----------------------|---------------------------|
| Study-level covariate | Hospital Inpatient   | Prevalence            | 0.60 (0.59 - 0.60)    | 1.82 (1.81 - 1.82)        |
| Study-level covariate | Claims data - 2000   | Prevalence            | 0.19 (0.15 - 0.23)    | 1.21 (1.16 - 1.26)        |
| Study-level covariate | Claims data - 2010   | Prevalence            | -0.02 (-0.05 - 0.02)  | 0.98 (0.95 - 1.02)        |
| Country covariate     | LDI (I\$ per capita) | Excess mortality rate | -0.56 (-0.57 - -0.54) | 0.57 (0.56 - 0.58)        |

The symptomatic episodes of gallbladder and biliary diseases DisMod model bounded remission from 9 to 26 (a duration of about two to six weeks). The reference data were US claims data from 2012, and we marked other US claims years data, inpatient data, and literature with specific study-level covariates. We used the function in DisMod-MR 2.1 to pull in cause-specific mortality rate (CSMR) data from our CODEm and CODcorrect analyses and match with incidence data points for the same geography. We calculated excess mortality rate to estimate priors by dividing CSMR by incidence/remission. We also applied a lag-distributed income covariate to excess mortality, log transformed and forced negative with an upper bound of 0 and a lower bound of -1. Betas and exponentiated values (which can be interpreted as an odds ratio) are shown in the tables below for study-level covariates and country-level covariates.

| <b>Covariate type</b> | <b>Covariate</b>     | <b>Parameter</b>      | <b>beta</b>           | <b>Exponentiated beta</b> |
|-----------------------|----------------------|-----------------------|-----------------------|---------------------------|
| Study-level covariate | Hospital Inpatient   | Incidence             | 0.70 (0.70 - 0.70)    | 2.01 (2.01 - 2.01)        |
| Study-level covariate | Literature           | Incidence             | -0.87 (-1.13 - -0.60) | 0.42 (0.32 - 0.55)        |
| Study-level covariate | Claims data - 2000   | Incidence             | -0.34 (-0.37 - -0.30) | 0.71 (0.69 - 0.74)        |
| Study-level covariate | Claims data - 2010   | Incidence             | -0.00 (-0.01 - -0.00) | 1.00 (0.99 - 1.00)        |
| Country covariate     | LDI (I\$ per capita) | Excess mortality rate | -0.66 (-0.67 - -0.65) | 0.51 (0.51 - 0.52)        |

To calculate prevalence of asymptomatic gallbladder and biliary diseases, we took the estimated prevalence of symptomatic episodes and subtracted it from our estimated prevalence of total gallbladder and biliary diseases.

# Pancreatitis

## Flowchart

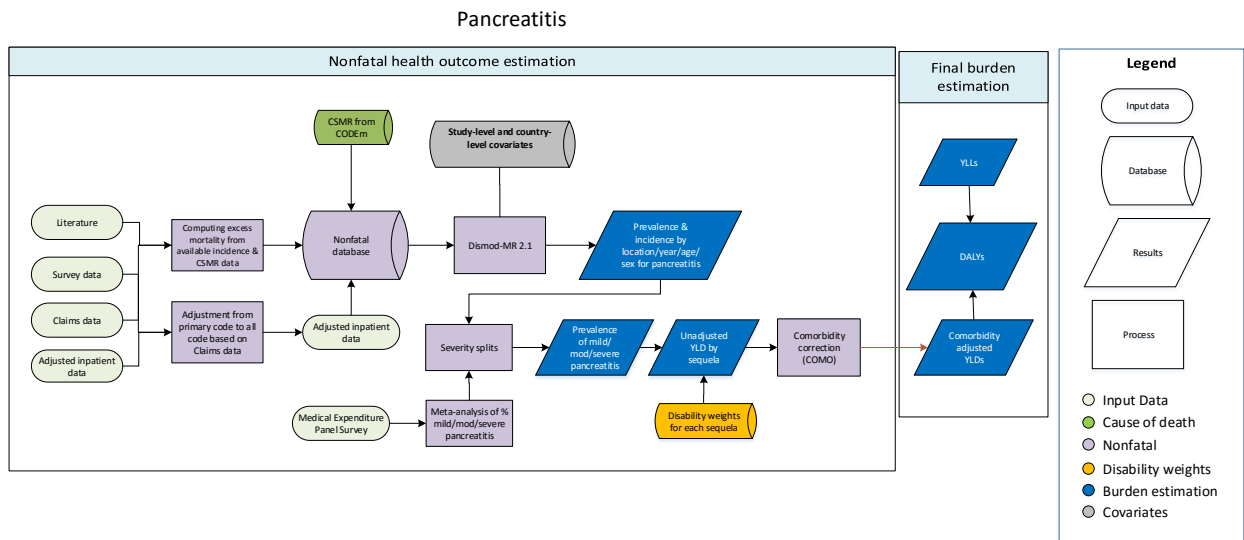

## Input data and methodological summary

### Case definition

Pancreatitis is the inflammation of the pancreas, and often results in nausea, stomach pain, and vomiting. We model acute and chronic pancreatitis together, using ICD codes K85 and K86.

### Input data

#### Model inputs

For GBD 2016, a systematic review of the prevalence and incidence of pancreatitis throughout the world was conducted. The exclusion criteria were studies clearly not representative of the national population (ie. alcoholics or smokers), self-reported data, and reviews. In addition to literature, we included hospital inpatient and US claims data for 2000, 2010, and 2012 by US state. Data were outliered or excluded if we found them unreasonable when compared to regional, super-regional, and global rates.

The table below shows the number of literature studies included in GBD 2016, as well as the number of countries or subnational units and GBD world regions represented.

|                        | Prevalence | Incidence |
|------------------------|------------|-----------|
| Studies                | 5          | 19        |
| Countries              | 4          | 40        |
| Countries/subnationals | 4          | 318       |
| GBD world regions      | 2          | 6         |

### Disability weights

The basis of the GBD disability weight survey assessments are lay descriptions of sequelae highlighting major functional consequences and symptoms. The lay descriptions and disability weights for pancreatitis are shown below:

| Severity split               | Lay description                                                                                                               | DW (95% CI)         |
|------------------------------|-------------------------------------------------------------------------------------------------------------------------------|---------------------|
| Pancreatitis cases, mild     | This person has some pain in the belly that causes nausea but does not interfere with daily activities.                       | 0.011 (0.005-0.021) |
| Pancreatitis cases, moderate | This person has pain in the belly and feels nauseous. The person has difficulties with daily activities.                      | 0.114 (0.080-0.159) |
| Pancreatitis cases, severe   | This person has severe pain in the belly and feels nauseated. The person is anxious and unable to carry out daily activities. | 0.324 (0.219-0.442) |

### Modelling strategy

Prior settings in the DisMod model included bounding remission from 8 to 9 (a duration from about six weeks) for all ages. The reference data were literature and US claims data from 2012. We marked hospital inpatient and other US claims years data with a separate year-specific study-level covariate. Additionally, we marked literature that reported acute pancreatitis only, with an acute study-level covariate.

We used the function in DisMod-MR 2.1 to pull in cause-specific mortality rate (CSMR) data from our CODEm and CODcorrect analyses and match with incidence and prevalence data points for the same geography. We calculated excess mortality rate to estimate priors by dividing CSMR by incidence/remission (or prevalence, if applicable). We also applied a country-level log-transformed age-standardized SEV scalar covariate for pancreatitis to incidence with bounds of 0.75 to 1.25, and a lag-distributed income covariate to excess mortality, log-transformed and forced negative with an upper bound of 0 and a lower bound of -1.

Betas and exponentiated values (which can be interpreted as an odds ratio) are shown in the tables below for study-level covariates and country-level covariates:

| Covariate type        | Covariate          | Parameter | beta                  | Exponentiated beta |
|-----------------------|--------------------|-----------|-----------------------|--------------------|
| Study-level covariate | Acute              | Incidence | -0.92 (-1.06 - -0.78) | 0.40 (0.35 - 0.46) |
| Study-level covariate | Hospital Inpatient | Incidence | 0.90 (0.90 - 0.90)    | 2.46 (2.46 - 2.46) |
| Study-level covariate | Claims data - 2000 | Incidence | -0.44 (-0.48 - -0.40) | 0.64 (0.62 - 0.67) |

|                       |                          |                       |                       |                    |
|-----------------------|--------------------------|-----------------------|-----------------------|--------------------|
| Study-level covariate | Claims data -2010        | Incidence             | 0.07 (0.03 - 0.10)    | 1.07 (1.03 - 1.10) |
| Country covariate     | SEV scalar, Pancreatitis | Incidence             | 1.24 (1.21 - 1.25)    | 3.45 (3.35 - 3.49) |
| Country covariate     | LDI (I\$ per capita)     | Excess mortality rate | -1.00 (-1.00 - -1.00) | 0.37 (0.37 - 0.37) |



## Other digestive diseases

In addition to the digestive diseases described above, there are many diverse types of digestive diseases with a range of severities and associated sequelae. Because these digestive diseases are diverse in their underlying causes and risk factors as well as in their associated health outcomes, modelling them together in a DisMod-MR model would not produce reliable estimates of prevalence or excess mortality. Instead, we calculated the YLDs caused by digestive diseases directly using a YLD/YLL ratio.

We calculated the ratio of YLDs to YLLs across the specified digestive diseases for which nonfatal outcomes were modelled, using YLL estimates from the GBD 2016 cause of death (CoD) analysis. We then multiplied this YLD/YLL ratio by the YLL estimates for other digestive diseases from the GBD 2016 CoD analysis, providing us with an estimate of the YLDs associated with other digestive diseases.

# Alzheimer's Disease and Other Dementias

## Flowchart

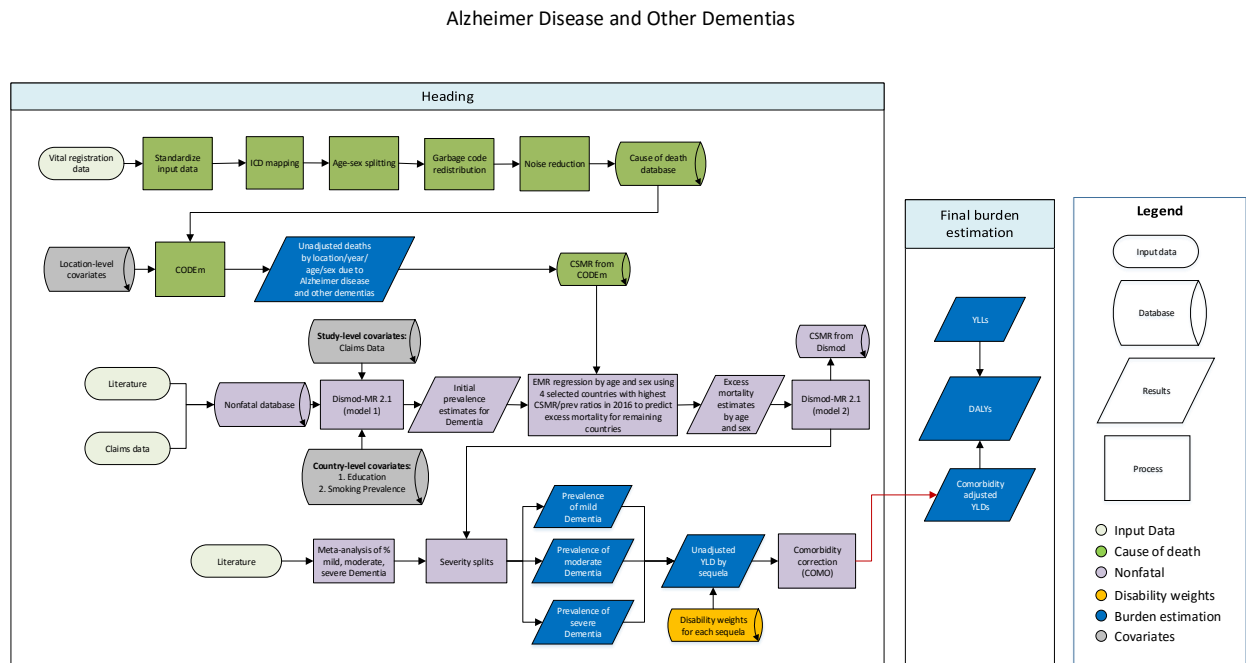

## Input data and methodological summary

### Case definition

Dementia is a progressive, degenerative, and chronic neurological disorder typified by memory impairment and other neurological dysfunctions. For the purposes of GBD 2016, we use the Diagnostic and Statistical Manual of Mental Disorders III, IV or V, or ICD case definitions as the reference. A wide array of diagnostic and screening instruments exists, including Clinical Dementia Rating scale (CDR), Mini Mental State Examination (MMSE), and the Geriatric Mental State (GMS). For severity rating purposes we use the CDR as the reference. The relevant ICD-10 codes for dementia are F00, F01, F02, F03, G30, and G31. The ICD-9 codes are 290, 291.2, 291.8, 294 and 331.

Unlike most causes in the Global Burden of Disease project, dementia mortality and morbidity estimates are modelled jointly. This is because of marked discrepancies between prevalence data and cause of death data. Specifically, prevalence data suggest little to no variation over time (eg, 1990–2016) whereas age-standardized mortality rates in vital registrations in high-income countries have increased multiple times over this same period. Additionally, prevalence variation between countries is much smaller than the variation in death rates assigned to dementia in vital registration. We attribute these discrepancies to changing coding practices rather than epidemiological change.

Because of this joint procedure, descriptions of the mortality estimation process are included where relevant.

## Input data

### *Model inputs*

To inform our estimates of burden due to dementia, we use mortality data from vital registration systems, as well as prevalence data from surveys, and administrative data such as claims sources.

An updated systematic review was conducted covering January 2015 to October 2016, and search terms<sup>7</sup> were set to capture studies for all dementia, including its sub-types. The search yielded 1,208 initial hits and 27 were marked for extraction. Inclusion criteria comprised studies that reported prevalence, incidence, remission rate, excess mortality rate, relative risk of mortality, standardised mortality ratio, or with-condition mortality rate. Studies with no clearly defined sample were excluded. A flow chart documenting this review is displayed below.

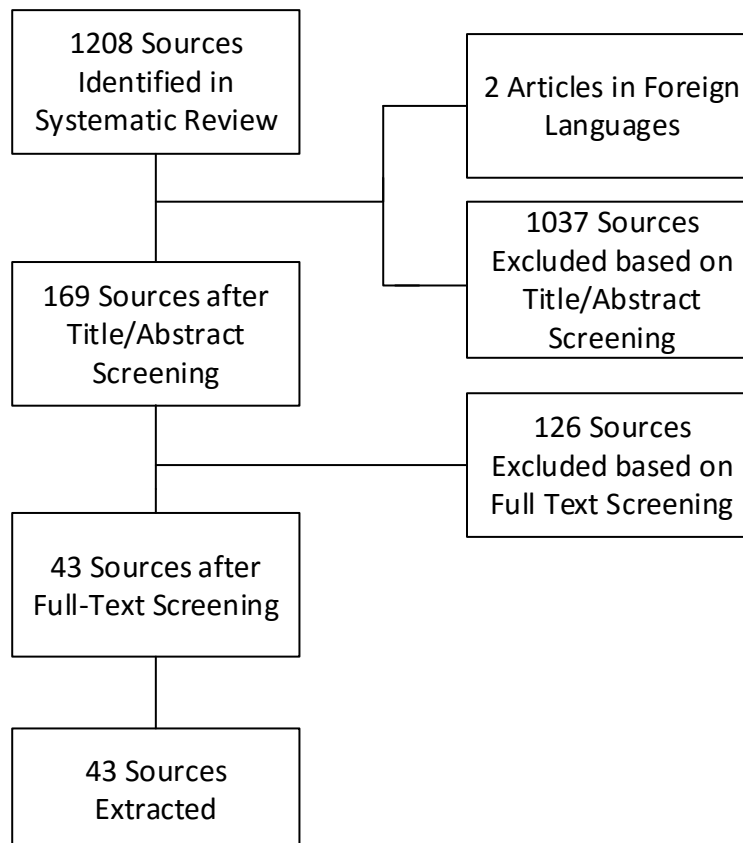

<sup>7</sup> ((dementia[Title/Abstract]) AND ((incidence[Title/Abstract]) or (prevalence[Title/Abstract]))) AND ("2015/01/23"[Date - Publication] : "3000"[Date - Publication])

Additionally, a table describing the density and distribution of the epidemiological data available for GBD 2016 is presented below:

|                        | Prevalence | Incidence | Mortality risk | Severity |
|------------------------|------------|-----------|----------------|----------|
| Studies                | 174        | 60        | 15             | 17       |
| Countries/subnationals | 131        | 37        | 19             | 15       |
| GBD world regions      | 17         | 10        | 9              | 8        |

### Severity splits

In GBD 2013 (and still used in GBD 2016), we extracted data from studies reporting on mild, moderate, and severe dementia. As the data indicate an age pattern with greater proportions with more severe disease in the very old, we restricted our analyses to studies reporting on severity <70, 70-79, and 80+ ages. Most of these studies reported severity based on the CDR scale: CDR=1 as mild, CDR=2 as moderate, and CDR=3 as severe dementia. Other studies report staging of dementia according to MMSE; the Functional capacity scale; the Cambridge Mental Disorders of the Elderly Examination (CAMDEX); the scale of Hughes and the Geriatric Mental State (GMS). This year we excluded all studies that used the DSM III criteria, as we found that these sources reported systematically higher severities. We used a random effects meta-analysis to pool the data by severity level.

We multiplied estimations of prevalence (country-year-sex-age-specific) by the fractions of mild, moderate, and severe dementia and estimated 95% uncertainty intervals at the 1,000-draw level.

| Severity level | Lay description                                                                                                                                      | DW (95% CI)            | Severity distribution                                         |
|----------------|------------------------------------------------------------------------------------------------------------------------------------------------------|------------------------|---------------------------------------------------------------|
| Mild           | The person has some trouble remembering recent events and finds it hard to concentrate and make decisions and plans.                                 | 0.069<br>(0.046–0.099) | <70: 79% (65–86%)<br>70-79: 71% (51–84%)<br>80+: 61% (44–76%) |
| Moderate       | The person has memory problems and confusion, feels disoriented, at times hears voices that are not real, and needs help with some daily activities. | 0.377<br>(0.252–0.508) | <70: 17% (5–24%)<br>70-79: 19% (8–37%)<br>80+: 26% (16–34%)   |
| Severe         | The person has complete memory loss, no longer recognizes close family members, and requires help with all daily activities.                         | 0.449<br>(0.304–0.595) | <70: 4% (2–42%)<br>70-79: 9% (8–17%)<br>80+: 12% (9–24%)      |

### Modelling strategy

As mentioned above, the estimation of morbidity due to dementia occurs in conjunction with the mortality estimation.

First, we ran a CODEm model for dementia and extracted the mortality rates by age, sex, and geography for 2016.

Second, we ran a DisMod-MR 2.1 model with all data on incidence, prevalence, and mortality risk (relative risk, standardized mortality ratio, or with-condition mortality rates) and a setting of zero remission and

extracted 2016 prevalence by age, sex, and geography. To account for potential systematic differences between claims and survey data, we crosswalked for each year of claims data.

Third, we selected countries where the sum of cause-specific mortality rate to prevalence ratio for males and females exceeded 0.4 (excluding small island nations and those without vital registration). This resulted in choosing the United States, Sweden, Finland and Puerto Rico. The choice to pick fewer countries for this regression compared to GBD 2015, which used 30 countries in the EMR regression, was motivated by a desire to reduce the spread in EMR values, as countries used in the regression retain their original EMR values.

Fourth, we used a linear effects regression with dummies on age group and sex to predict excess mortality (ie, the ratio of cause-specific mortality rate and prevalence) by age and sex, the results of which are found in the Tables below.

**Table: Fixed effect coefficients of EMR regression. Outcome: ln(EMR)**

| Independent variables | Coef   | Std. error | P value | 95% Confidence Interval |        |
|-----------------------|--------|------------|---------|-------------------------|--------|
|                       |        |            |         |                         |        |
| Male                  | 0.047  | 0.054      | 0.394   | -0.06                   | 0.153  |
| Age 40-59             | -3.299 | 0.115      | 0.000   | -3.524                  | -3.073 |
| Age 60-64             | -2.627 | 0.115      | 0.000   | -2.852                  | -2.401 |
| Age 65-69             | -2.395 | 0.115      | 0.000   | -2.62                   | -2.169 |
| Age 70-74             | -2.068 | 0.115      | 0.000   | -2.293                  | -1.842 |
| Age 75- 79            | -1.686 | 0.115      | 0.000   | -1.911                  | -1.461 |
| Age 80-84             | -1.362 | 0.115      | 0.000   | -1.587                  | -1.137 |
| Age 85-89             | -0.949 | 0.115      | 0.000   | -1.175                  | -0.724 |
| Age 90-94             | -0.426 | 0.115      | 0.001   | -0.651                  | -0.2   |
| Constant              | -1.539 | 0.086      | 0.000   | -1.707                  | -1.371 |

**Table: Predicted EMR values by age and sex (95% CI)**

|            | Male                  | Female                |
|------------|-----------------------|-----------------------|
| Age 40-59  | 0.008 (0.007 - 0.01)  | 0.008 (0.007 - 0.009) |
| Age 60-64  | 0.016 (0.014 - 0.019) | 0.016 (0.013 - 0.018) |
| Age 65-69  | 0.021 (0.017 - 0.024) | 0.02 (0.017 - 0.023)  |
| Age 70-74  | 0.029 (0.024 - 0.034) | 0.027 (0.023 - 0.032) |
| Age 75- 80 | 0.042 (0.035 - 0.049) | 0.04 (0.034 - 0.047)  |
| Age 80-84  | 0.058 (0.049 - 0.068) | 0.055 (0.047 - 0.064) |
| Age 85-89  | 0.088 (0.074 - 0.104) | 0.084 (0.07 - 0.098)  |
| Age 90-94  | 0.147 (0.124 - 0.174) | 0.14 (0.118 - 0.165)  |
| Age 95+    | 0.226 (0.19 - 0.268)  | 0.216 (0.183 - 0.254) |

Fifth, these estimates were added to a second DisMod-MR 2.1 model as pertaining to the full 1990–2016 estimation period. For the four countries included in the regression, we retained their age- and sex-specific ratios and entered those also as pertaining to the full 1990–2016 estimation period. Thus, the model reflects the cause-specific mortality rate if all countries over time would have had the average propensity to code to dementia as an underlying cause of death similar to the selected four countries in 2016.

In this model, we assumed zero remission as well as zero excess mortality and incidence until age 40. Because of lack of consistency between prevalence and incidence data in locations where the underlying data, we excluded incidence data from the final model. In a few locations we found good consistency between prevalence and incidence and these were locations where incidence and prevalence were collected as part of the same study. In other locations (Beijing, Australia, Italy, Canada, various states in the US, Mexico, and Nigeria) we noted that DisMod-MR 2.1 was pushing the fit above the available prevalence data and below incidence – “averaging the difference.” In all cases the incidence and prevalence data were collected by different studies. We decided to drop the incidence estimates as measuring incidence of dementia when symptoms are still mild is more prone to measurement bias than measuring prevalence when the diagnosis has become more obvious over time.

The table below provides additional information on the country covariates used in this model, as well as beta and exponentiated beta values.

| Variable                                      | Measure    | Beta   | Exponentiated Beta Value (CI) |
|-----------------------------------------------|------------|--------|-------------------------------|
| Mean years of education, age-standardized     | prevalence | -0.053 | 0.95<br>(0.85–1.00)           |
| Smoking prevalence, age-standardized both sex | Prevalence | 0.11   | 1.11<br>(1.06–1.17)           |
| US claims data 2000                           | prevalence | -0.69  | 0.50<br>(0.48–0.55)           |
| US claims data 2010                           | prevalence | -0.25  | 0.78<br>(0.75–0.86)           |
| US claims data 2012                           | prevalence | -0.25  | 0.78<br>(0.75–0.86)           |

As described above, we used crosswalks to standardize the claims data relative to existing literature data. Age-standardized education was used as a proxy for general brain health/use that may be protective of dementia – specifically Alzheimer’s disease. Smoking prevalence (age-standardised, both sexes) was also used as a covariate to guide estimates, as the literature has shown a positive relationship between smoking and dementia.

# Parkinson Disease

## Flowchart

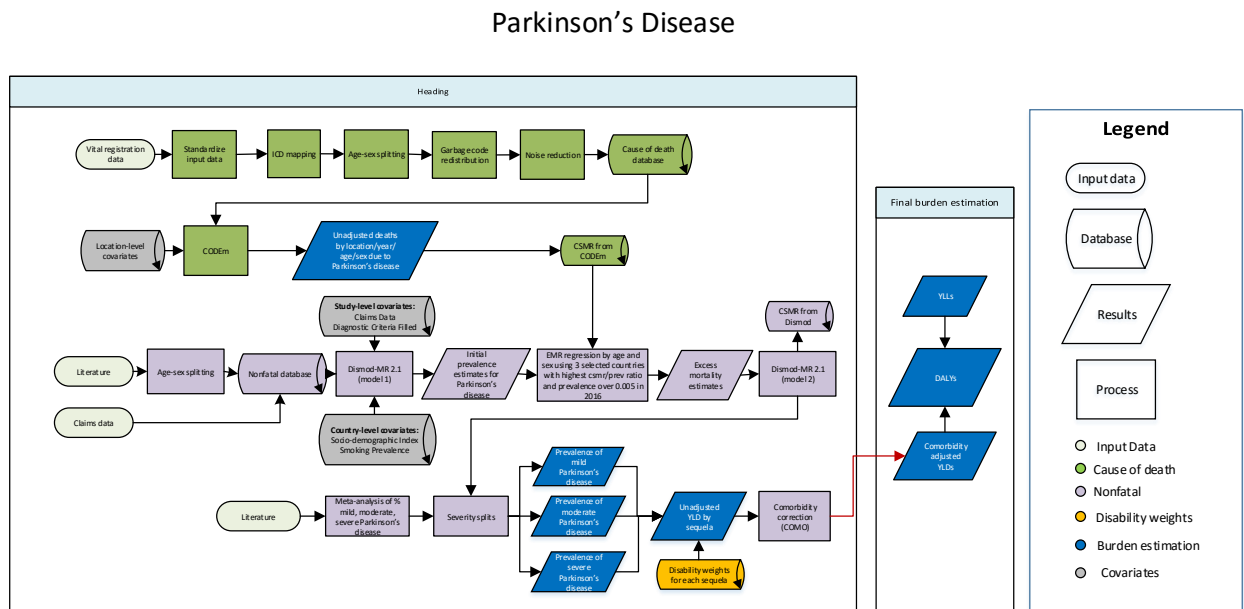

## Case definition

Parkinson's disease is a chronic, degenerative, and progressive neurological condition typified by the loss of motor mobility and control – most notably tremors. The corresponding ICD-10 codes are G20, G21, and G22. Our case definition for GBD is the presence of at least two of the four primary symptoms: (1) tremors/trembling, (2) bradykinesia, (3) stiffness of limbs and torso, and (4) posture instability.

Unlike most causes in the Global Burden of Disease project, Parkinson's disease mortality and morbidity estimates are modelled jointly. This is because of marked discrepancies between prevalence data and cause of death data. Specifically, prevalence data suggest little to no variation over time (eg, 1990–2016) whereas age-standardized mortality rates in vital registrations in high-income countries have increased multiple times over this same period. Additionally, prevalence variation between countries is much smaller than the variation in death rates assigned to Parkinson's disease in vital registration. We attribute these discrepancies to changing coding practices rather than epidemiological change.

Because of this joint procedure, descriptions of the mortality estimation process are included where relevant.

## Input data

### Model inputs

To inform our estimates of burden due to Parkinson's disease, we use mortality data from vital registration systems, as well as prevalence data from surveys, and administrative data such as claims sources.

For GBD 2015, a systematic review was conducted from January 2011 to December 2015, and the search terms were set to capture studies for Parkinson’s disease.<sup>8</sup> This search term resulted in 1,433 initial hits with 17 sources marked for extraction. Studies with no clearly defined sample or that drew from specific clinic/patient organizations were excluded.

The following table provides a description of the density and distribution of literature data informing the Parkinson’s estimates:

|                        | Prevalence | Incidence | Mortality risk |
|------------------------|------------|-----------|----------------|
| Studies                | 94         | 34        | 10             |
| Countries/subnationals | 134        | 31        | 10             |
| Regions                | 16         | 9         | 3              |

Beyond the exclusion of studies using non-representative populations, there are no substantial adjustment or outlier criteria for the Parkinson’s model. Certain studies have been outliered on a case-by-case basis due to subsequent review and exclusion due to inappropriateness of the study design, and overly broad age and sex groups that conflict with existing gold-standard age-sex-specific data – where possible.

### *Severity splits*

As in GBD 2013, we use Hoehn and Yahr stages to determine severity. However, for GBD 2016, the cutpoints were updated in order to more accurately correspond with the lay descriptions of severities. Specifically, a Hoehn and Yahr stage 4 now corresponds to a designation of severe, where before it was classified as moderate.

| Severity | Stage   |
|----------|---------|
| Mild     | ≤2.0    |
| Moderate | 2.5-3.5 |
| Severe   | ≥4      |

For GBD 2016, a literature review was completed to update the severity splits meta-analysis. The systematic review covered 1/1/2008 to 11/10/2016 and the search terms were set to capture studies reporting prevalence of Parkinson’s by Hoehn and Yahr stage.<sup>9</sup> The search term resulted in 234 hits with 21 marked for extraction.

The following figures show the results of the meta-analysis on Hoehn and Yahr stage:

<sup>8</sup> (((((Parkinson disease AND epidemiology) AND ( "2011/01/01"[PDat] : "2015/12/31"[PDat] ))) AND ((Parkinson disease AND epidemiology))))

<sup>9</sup> (("1/1/2008"[Date - Publication] : "2016"[Date - Publication])) AND (parkinson disease[MeSH Terms] OR parkinson disease) AND (epidemiology OR prevalence OR incidence) AND (Hoehn) AND (Yahr) AND (stage)



Figure 1. Percentage of mild cases of Parkinson's disease in population-based studies

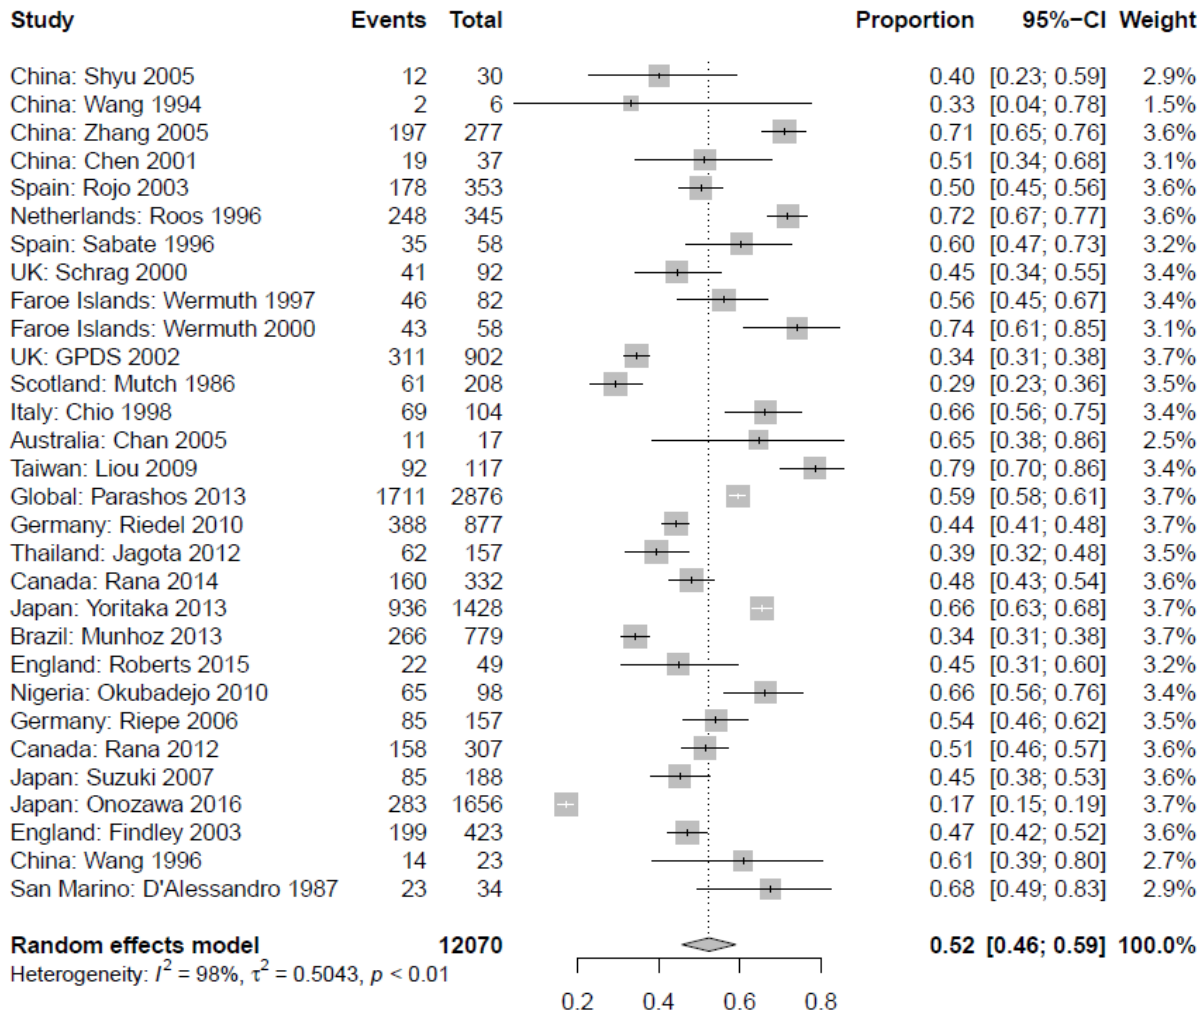

Figure 2. Percentage of moderate cases of Parkinson's disease in population-based studies

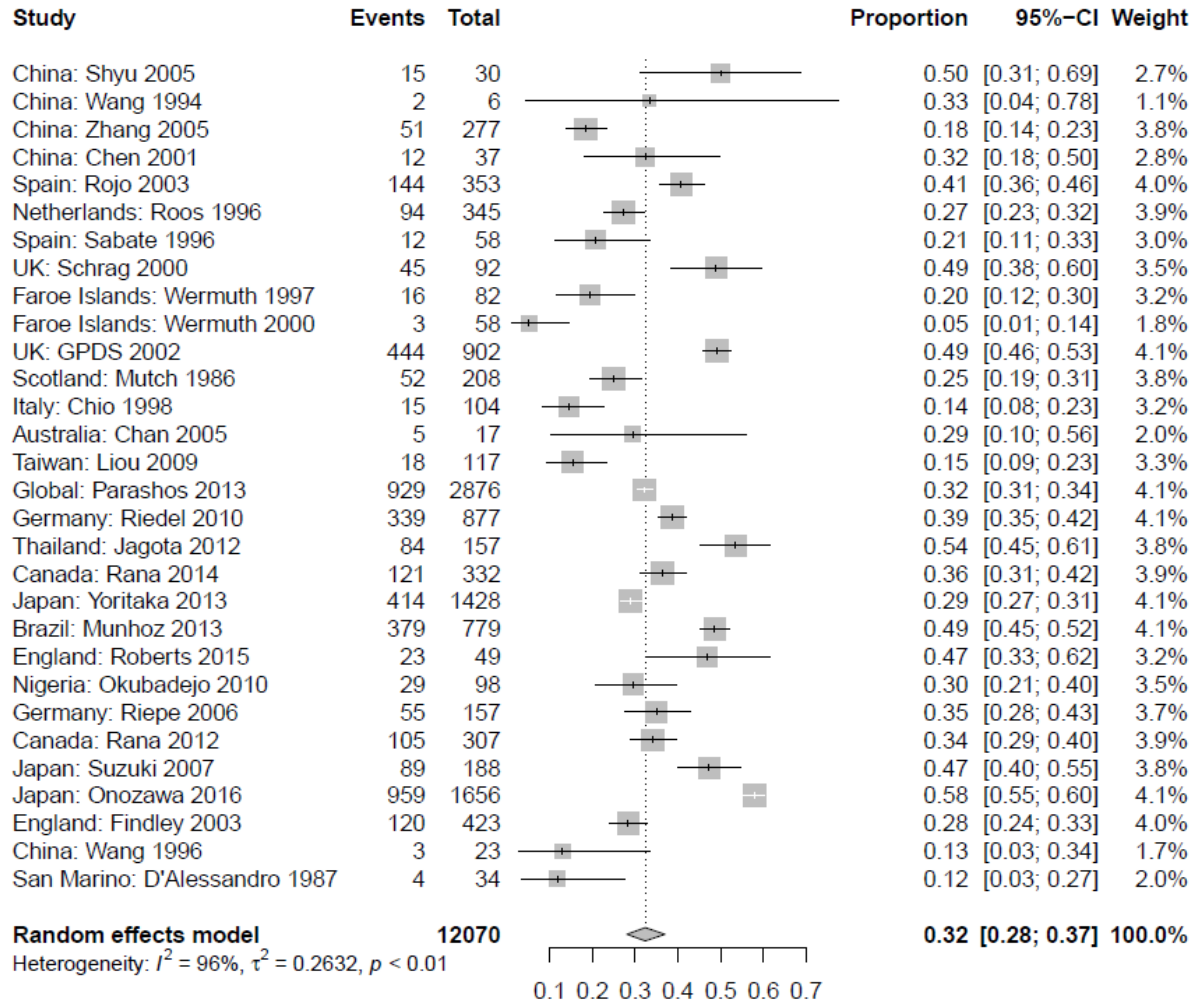

Figure 3. Percentage of severe cases of Parkinson’s disease in population-based studies

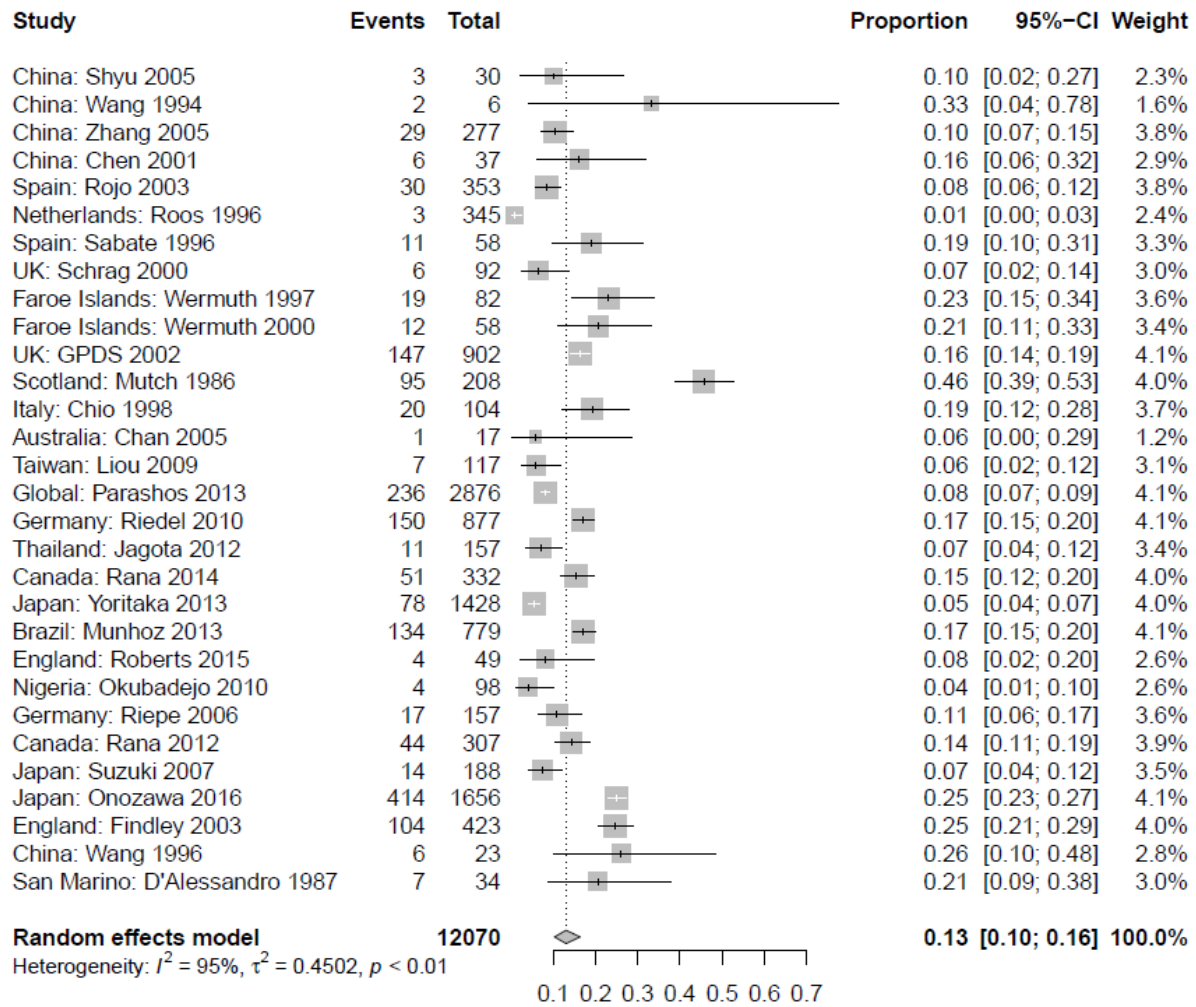

Severity estimates were generated by multiplying estimates of prevalence (country-year-sex-age-specific) by the fractions of mild, moderate, and severe PD and estimated 95% confidence intervals by taking 1,000 draws.

The following table provides the lay description and disability weights associated with Parkinson’s disease.

| Severity level | Lay description                                                                                                                                                                         | DW (95% CI)            |
|----------------|-----------------------------------------------------------------------------------------------------------------------------------------------------------------------------------------|------------------------|
| Mild           | Has mild tremors and moves a little slowly, but is able to walk and do daily activities without assistance.                                                                             | 0.01<br>(0.005–0.019)  |
| Moderate       | Has moderate tremors and moves slowly, which causes some difficulty in walking and daily activities. The person has some trouble swallowing, talking, sleeping, and remembering things. | 0.267<br>(0.181–0.372) |

|        |                                                                                                                                                                                                                     |                       |
|--------|---------------------------------------------------------------------------------------------------------------------------------------------------------------------------------------------------------------------|-----------------------|
| Severe | Has severe tremors and moves very slowly, which causes great difficulty in walking and daily activities. The person falls easily and has a lot of difficulty talking, swallowing, sleeping, and remembering things. | 0.575<br>(0.396–0.73) |
|--------|---------------------------------------------------------------------------------------------------------------------------------------------------------------------------------------------------------------------|-----------------------|

### Modelling strategy

First, we ran a CODEm model for Parkinson disease and extracted the mortality rates by age, sex, and geography for 2016.

Second, we ran a DisMod-MR 2.1 model with all data on incidence, prevalence, and mortality risk (relative risk, standardized mortality ratio, or with-condition mortality rates) and a setting of zero remission and extracted 2016 prevalence by age, sex, and geography. To account for potential systematic differences between claims and survey data, we crosswalked for each year of claims data.

Third, we selected the three countries (United States, Finland, and Austria) with the highest cause-specific mortality rate (from step 1) to prevalence (from step two) ratio, which also had prevalence rates above 0.0005, and a population greater than 1 million.

Fourth, we used a linear effects regression with dummies on age group and sex to predict excess mortality (ie, the ratio of cause-specific mortality rate and prevalence) by age and sex, the results of which are found in the tables below.

| Independent variables | Coef   | Std. error | P value | 95% Confidence Interval |        |
|-----------------------|--------|------------|---------|-------------------------|--------|
| Male                  | 0.214  | 0.074      | 0.006   | 0.069                   | 0.359  |
| Age 40-59             | -3.522 | 0.157      | 0.000   | -3.829                  | -3.214 |
| Age 60-64             | -2.716 | 0.157      | 0.000   | -3.024                  | -2.409 |
| Age 65-69             | -2.236 | 0.157      | 0.000   | -2.544                  | -1.929 |
| Age 70-74             | -1.686 | 0.157      | 0.000   | -1.993                  | -1.378 |
| Age 75- 80            | -1.194 | 0.157      | 0.000   | -1.502                  | -0.887 |
| Age 80-84             | -0.779 | 0.157      | 0.000   | -1.087                  | -0.471 |
| Age 85-89             | -0.493 | 0.157      | 0.003   | -0.800                  | -0.185 |
| Age 90-94             | -0.203 | 0.157      | 0.202   | -0.511                  | 0.104  |
| Constant              | -2.097 | 0.117      | 0.000   | -2.326                  | -1.867 |

|            | Male                  | Female                |
|------------|-----------------------|-----------------------|
| Age 40-59  | 0.005 (0.004 - 0.006) | 0.004 (0.003 - 0.005) |
| Age 60-64  | 0.01 (0.008 - 0.013)  | 0.008 (0.006 - 0.01)  |
| Age 65-69  | 0.016 (0.013 - 0.02)  | 0.013 (0.01 - 0.016)  |
| Age 70-74  | 0.028 (0.023 - 0.035) | 0.023 (0.018 - 0.029) |
| Age 75- 80 | 0.047 (0.037 - 0.059) | 0.037 (0.029 - 0.046) |
| Age 80-84  | 0.071 (0.055 - 0.089) | 0.057 (0.045 - 0.07)  |
| Age 85-89  | 0.093 (0.073 - 0.117) | 0.076 (0.06 - 0.093)  |

|           |                       |                       |
|-----------|-----------------------|-----------------------|
| Age 90-94 | 0.126 (0.099 - 0.155) | 0.101 (0.08 - 0.127)  |
| Age 95+   | 0.154 (0.122 - 0.191) | 0.123 (0.097 - 0.153) |

Fifth, these estimates were added to a second DisMod-MR 2.1 model as pertaining to the full 1990–2016 estimation period. For the three countries included in the regression, we retained their age- and sex-specific ratios and entered those also as pertaining to the full 1990–2016 estimation period. Thus, the model reflects the cause-specific mortality rate if all countries over time would have had the average propensity to code to dementia as an underlying cause of death similar to the selected three countries in 2016.

In this model, we assumed zero remission among all ages, with no incidence or excess mortality for ages zero to 20 years old. We ignore data on incidence, relative risk, standardized mortality ratio, and with-condition mortality as these were shown to be inconsistent with prevalence estimates. We also constrain the super-region random effects for prevalence and incidence to -0.25 and 0.25 to account for spurious inflation of regional differences.

We make one study-level crosswalk: Diagnostic Criteria. Studies that do not use the gold-standard case definition of presence of at least two of the four main symptoms are crosswalked to meet this gold standard definition. The table below shows the effect of this crosswalk, which results in a downward adjustment of non-standard data points. For GBD 2015, an additional adjustment was made for Case Ascertainment, or studies that ascertain cases on clinical record review rather than using live diagnostic processes. However, this adjustment was not significant for GBD 2016 and was therefore changed to a z-cov, which effects the uncertainty of the estimates.

Additionally, claims data for 2000, 2010, and 2012 are adjusted via study covariates to account for systematic differences between the claims data and the literature. We use a country-level crosswalk to assist DisMod in estimating global patterns. We use Socio-demographic Index as a proxy to capture possible social and cultural risk factors or modifiers of Parkinson’s prevalence.

The following table provides an overview of the study-level and country covariates used in the Parkinson’s model.

| Covariate                      | Measure    | Beta                           | Exponentiated         |
|--------------------------------|------------|--------------------------------|-----------------------|
| Socio-demographic Index        | prevalence | 1.44<br>(1.26 – 1.63)          | 4.22<br>(3.53 – 5.08) |
| All MarketScan, year 2012      | prevalence | -0.0043<br>(-0.016 - -0.00051) | 1.00<br>(0.98 – 1.00) |
| All MarketScan, year 2010      | prevalence | -0.0083<br>(-0.025 - -0.00021) | 0.99<br>(0.97 – 1.00) |
| All MarketScan, year 2000      | prevalence | -0.0086<br>(-0.022 - -0.00044) | 0.99<br>(0.98 – 1.00) |
| (Un)Filled diagnostic criteria | prevalence | 0.20<br>(0.13 - 0.27)          | 1.22<br>(1.14 – 1.31) |

# Multiple Sclerosis (MS)

## Flowchart

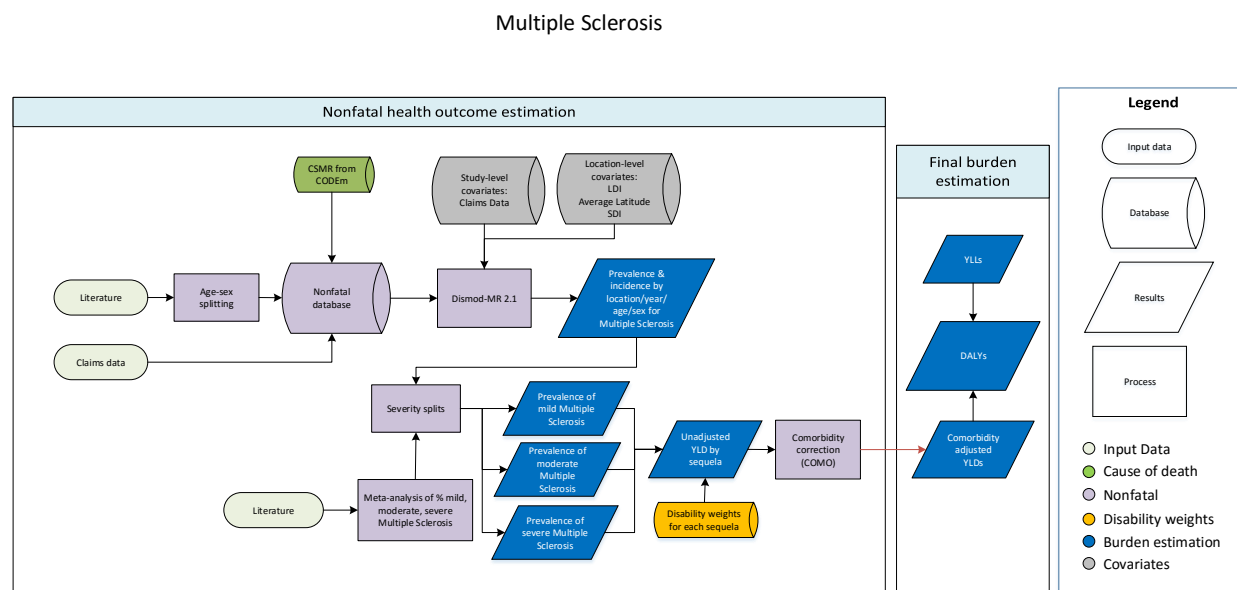

## Input data and methodological summary

### Case definition

Multiple sclerosis is a chronic, degenerative, and progressive neurological condition typified by the damaging of the myelin sheaths. For GBD, the McDonald's criteria for diagnosis are considered the gold standard, but other definitions such as Poser Committee's criteria and self-report of a doctor's diagnosis are also included. The ICD-10 code for MS is G35.

### Input data

A systematic review was conducted for MS for GBD 2015. The search using (multiple sclerosis AND epidemiology AND ( "2011/01/01"[PDat] : "2015/12/31"[PDat] )) from 1/1/2011-7/15/15 yielded 1756 hits with 28 sources marked for extraction.

The data underpinning estimates of burden due to MS are generally of two types. The first are representative, population-based surveys. This includes retrospective case/hospital report analysis, nationally representative health studies and the like. Studies with no clearly defined sample or that draw from specific clinic/patient organizations were excluded during the systematic review phase. The second type are claims data from the United States from 2000, 2010, and 2012. Additional information on the source and preparation of these data is provided elsewhere.

The following table provides a description of the density and distribution of literature data informing the MS estimates:

|                        |            |           |                |
|------------------------|------------|-----------|----------------|
|                        | Prevalence | Incidence | Mortality risk |
| Studies                | 132        | 65        | 14             |
| Countries/subnationals | 105        | 26        | 10             |
| GBD world regions      | 11         | 8         | 3              |

Beyond the exclusion of studies using non-representative populations, there are no substantial adjustment or outlier criteria for the MS model. Certain studies have been outliered on a case-by-case basis due to: (1) subsequent review and exclusion due to inappropriate of the study design, and overly broad age and sex groups that conflict with existing gold standard age-sex specific data – where possible.

*Severity splits*

For GBD 2016, we updated the meta-analysis of all eligible studies that reported EDSS. The search using (“2008”[Date - Publication] : “2016”[Date - Publication]) AND (multiple sclerosis[MeSH Terms] OR multiple sclerosis) AND (epidemiology OR prevalence OR incidence) AND (“Kurtzke’s Expanded Disability Status Scale”) from 1/1/2008 to 11/14/2016 yielded 355 hits, with 10 marked for extraction.

As in GBD 2013, we use Kurtzke’s Expanded Disability Status Scale (EDSS) to determine severity splits for MS. However, for GBD 2016 we added a category for asymptomatic multiple sclerosis in order to capture the initial stages of relapse-remitting multiple sclerosis which has no disability associated. The EDSS scores corresponding to each severity are as follows:

- Asymptomatic: EDSS = 0
- Mild: 0 < EDSS ≤ 3.5
- Moderate: 3.5 < EDSS ≤ 6.5
- Severe: 6.5 < EDSS ≤ 9.5

The table below illustrates severity levels, lay descriptions, and DWs.

| Severity level | Lay description                                                                                                                                                                      | DW (95% CI)            |
|----------------|--------------------------------------------------------------------------------------------------------------------------------------------------------------------------------------|------------------------|
| Asymptomatic   | -                                                                                                                                                                                    | 0<br>(0-0)             |
| Mild           | Has mild loss of feeling in one hand, is a little unsteady while walking, has slight loss of vision in one eye, and often needs to urinate urgently.                                 | 0.183<br>(0.124–0.253) |
| Moderate       | Needs help walking, has difficulty with writing and arm coordination, has loss of vision in one eye and cannot control urinating.                                                    | 0.463<br>(0.313–0.613) |
| Severe         | Has slurred speech and difficulty swallowing. The person has weak arms and hands, very limited and stiff leg movement, has loss of vision in both eyes and cannot control urinating. | 0.719<br>(0.534–0.858) |

Because not all sources had information on the number of cases with EDSS stage 0, instead reporting on a mild category, we implemented a two-step meta-analysis strategy. First we subsetted the studies to those that reported on the number of cases with EDSS stage 0, and did meta-analyses on the proportion of asymptomatic and mild cases. Then, we conducted meta-analyses on the full dataset to get the proportion mild, moderate and severe and we squeezed the asymptomatic and mild categories from the previous meta-analyses into the mild category established by the meta-analysis on the full dataset.

The following figures provide the result of the first meta-analysis on the asymptomatic and mild categories.

Figure 1. Asymptomatic cases of MS

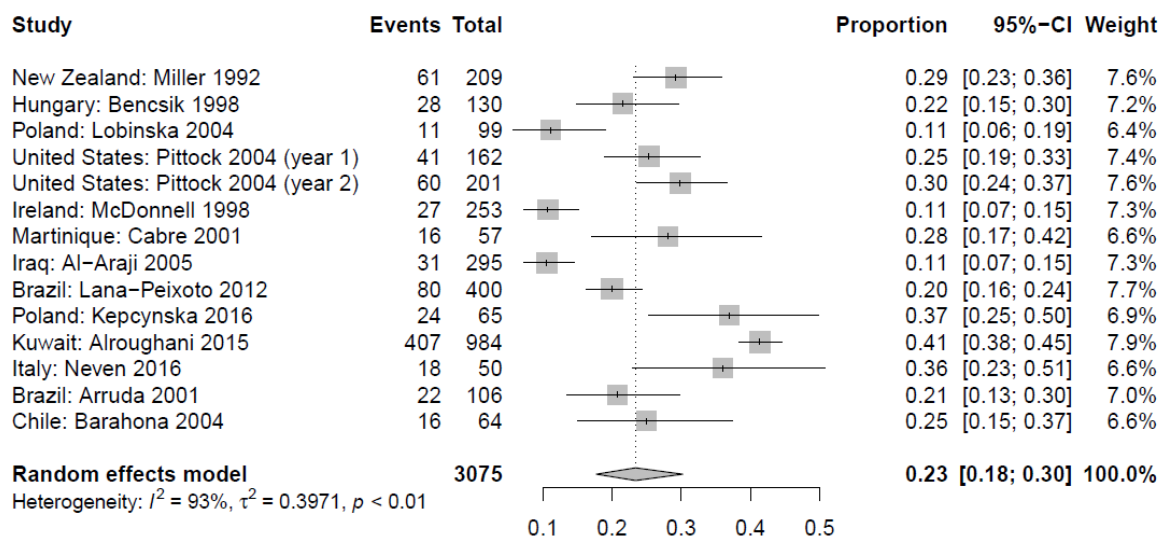

Figure 2. Mild Cases of MS

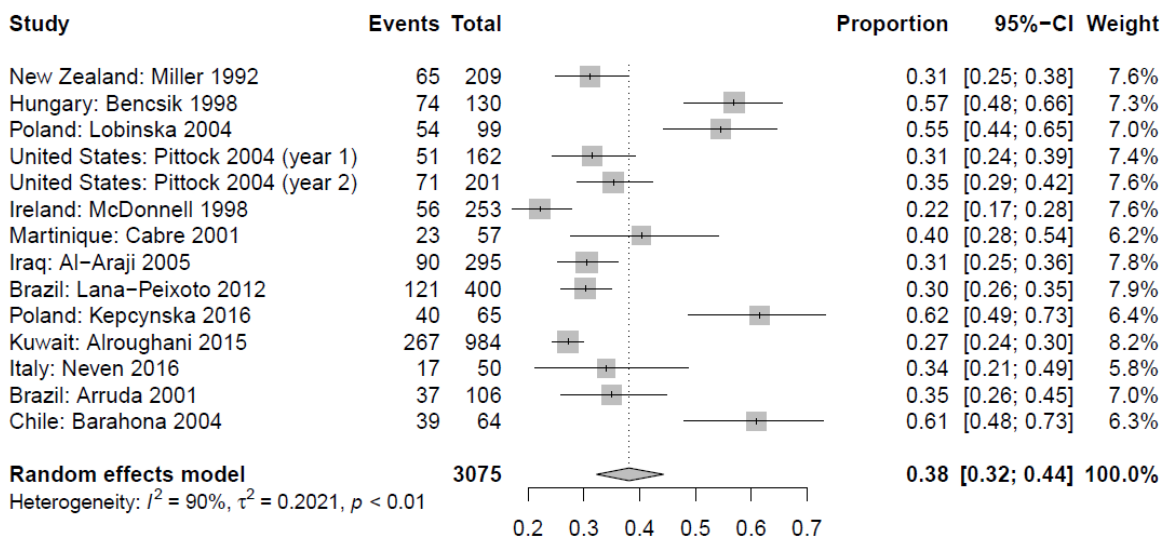



The following figures provide the result of the second meta-analysis on the mild, moderate and severe categories.

Figure 3. Mild Cases of MS (Including both Asymptomatic and Mild Categories)

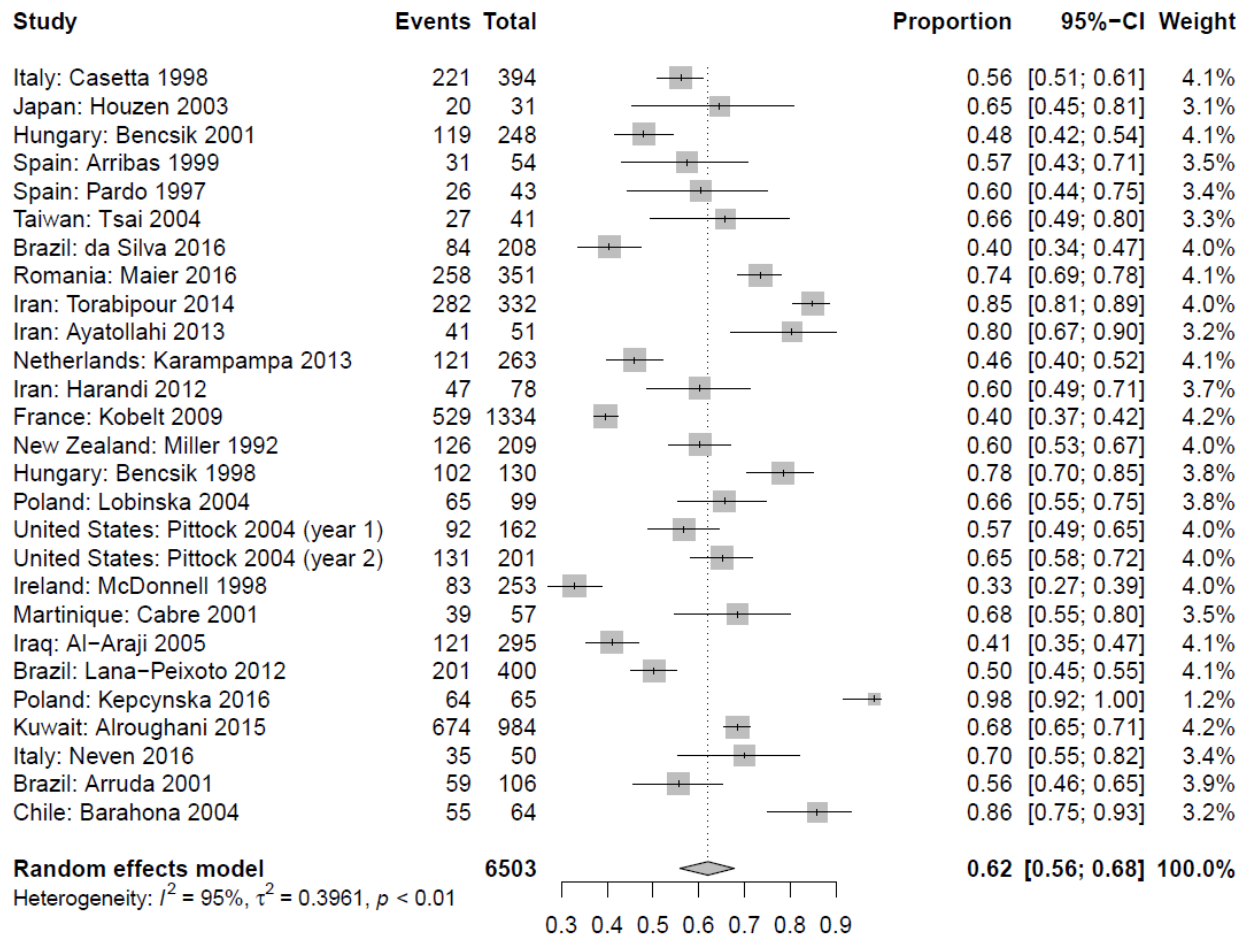

Figure 4. Moderate Cases of MS

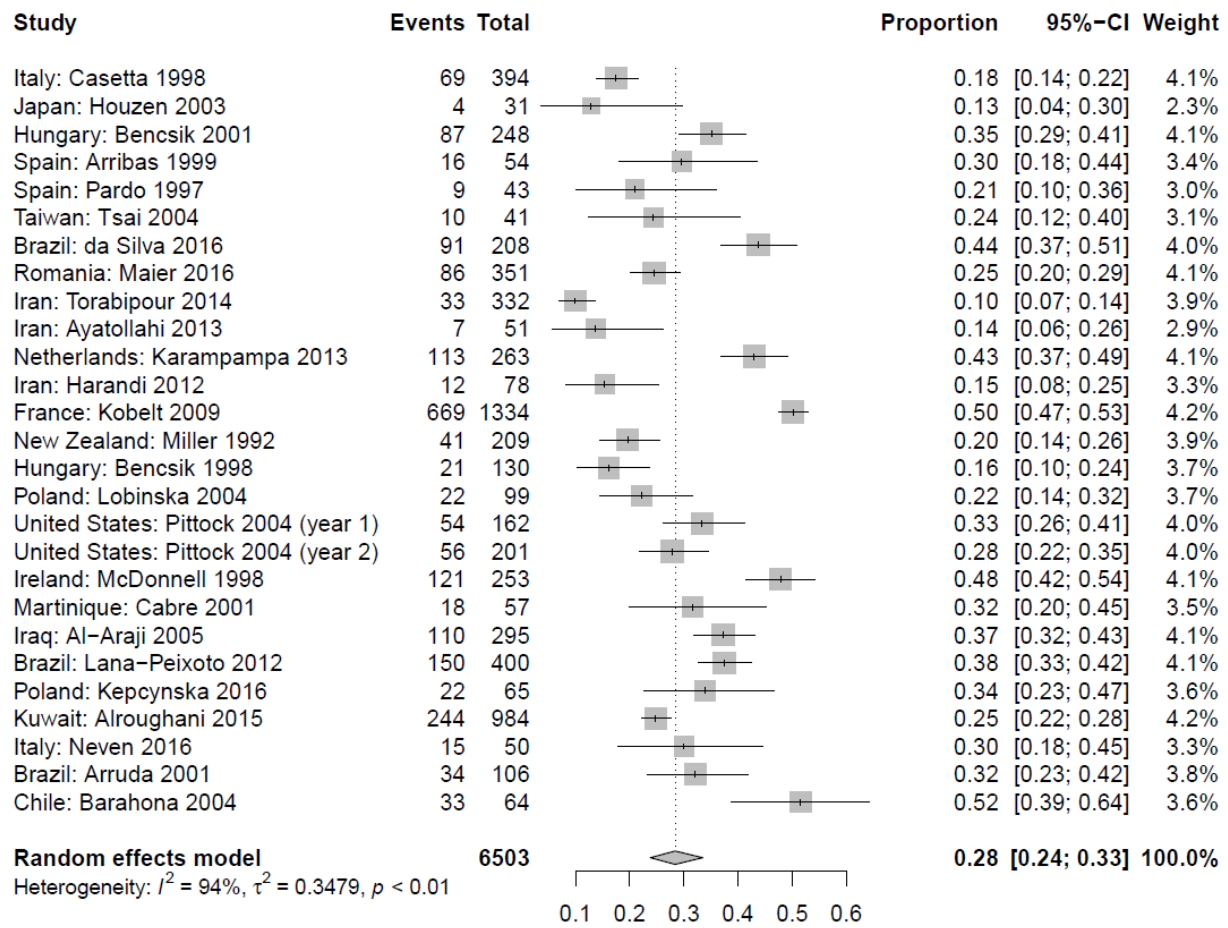

Figure 5. Severe Cases of MS

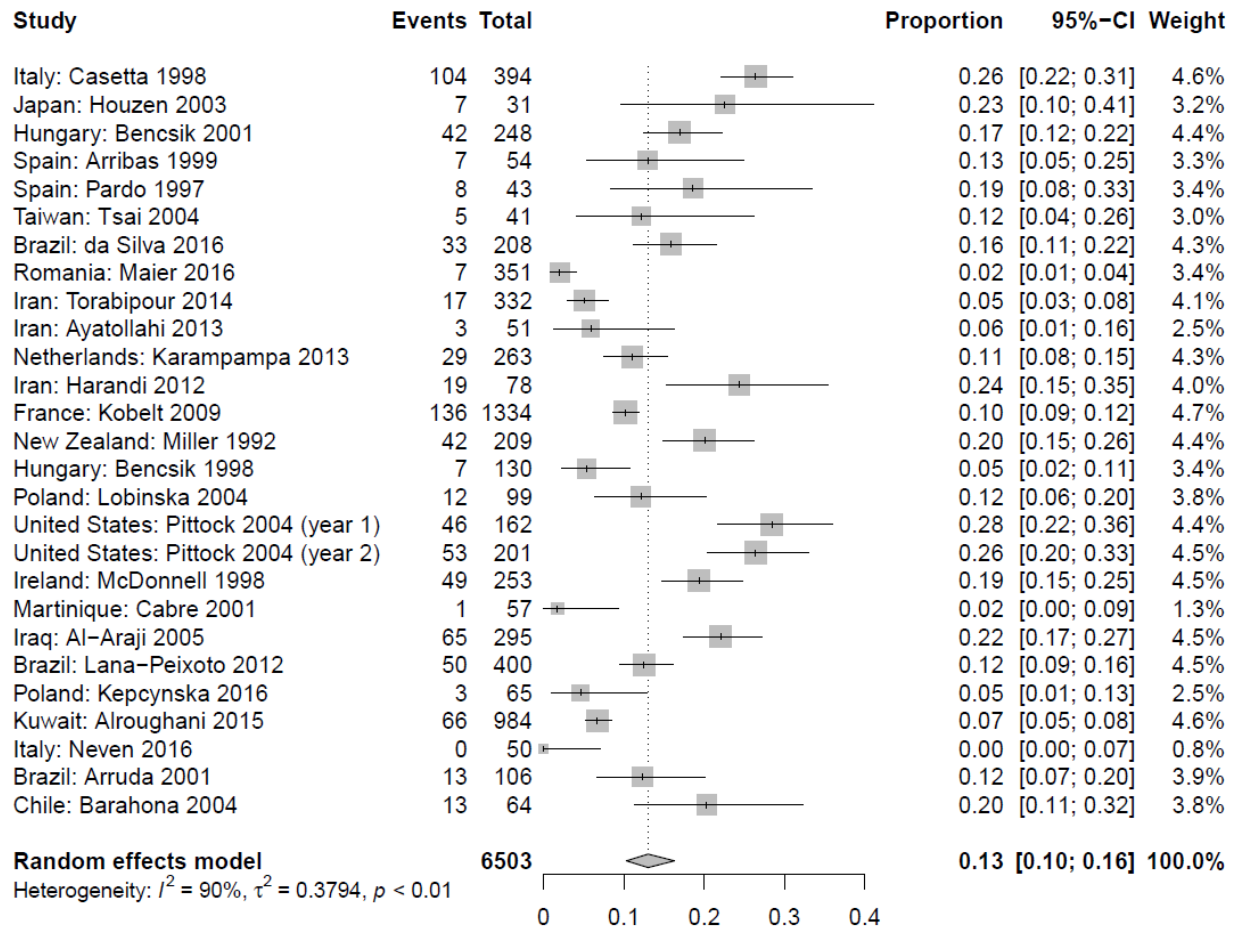

### Modelling strategy

We use DisMod 2.1 as the main analytical tool for the MS estimation process. Prior settings include zero remission for all ages, and no incidence or excess mortality for persons under 4 years old. We also constrain the super-region random effects for prevalence and incidence to -0.5 and 0.5 to account for spurious inflation of regional differences.

Claims data for 2000 and 2010 are adjusted via study covariates to account for systematically low estimates relative to the 2012 claims data. Implicit in this adjustment is the assumption that variation between years of claims data is a function of data collection inconsistencies and noise.

Similar to other cases we use GBD estimates of cause-specific mortality rate (CSMR) and Excess Mortality Rate (EMR) in this model.

To assist the estimation process, we use a several country-level covariates. These effects plus those of the study covariates are presented below.

| Covariate                           | Measure               | Beta                        | Exponentiated         | Parameter Type |
|-------------------------------------|-----------------------|-----------------------------|-----------------------|----------------|
| Absolute value of average latitude  | prevalence            | .029<br>(.026 - .040)       | 1.03<br>(1.03 - 1.04) | Country-level  |
| Absolute value of average latitude  | incidence             | .055<br>(.0095 - .061)      | 1.06<br>(1.01 - 1.06) | Country-level  |
| All MarketScan, year 2000           | prevalence            | -.26<br>(-.29 - -.22)       | .77<br>(.75 - .80)    | x-cov          |
| All MarketScan, year 2010           | prevalence            | -.0011<br>(-.0034 - -.0017) | .99<br>(.97 - 1.00)   | x-cov          |
| Healthcare access and quality index | excess mortality rate | -.048<br>(-.21 - -.035)     | .95<br>(.81 - .97)    | Country-level  |
| SDI                                 | prevalence            | 1.98<br>(1.96- 2.00)        | 7.24<br>(7.06- 7.38)  | Country-level  |

As described in the literature, extreme latitude is associated with higher prevalence and incidence of MS. While the pathway that affects MS is not fully understood, our results suggest a sizable relationship. Our operationalization of latitude is created by a population-weighted average of latitude by country and taking the absolute value. The underlying population distribution rasters are part of the Gridded Population of the World dataset.

Although there are no known cures for MS, we expect disease management to differ globally – largely as a function of available resources. To capture this, we use the healthcare access and quality index covariate to capture this relationship in the estimation of excess mortality.

To capture possible social and cultural risk factors or modifiers of MS prevalence, we include SDI as a covariate.

# Migraine

## Flowchart

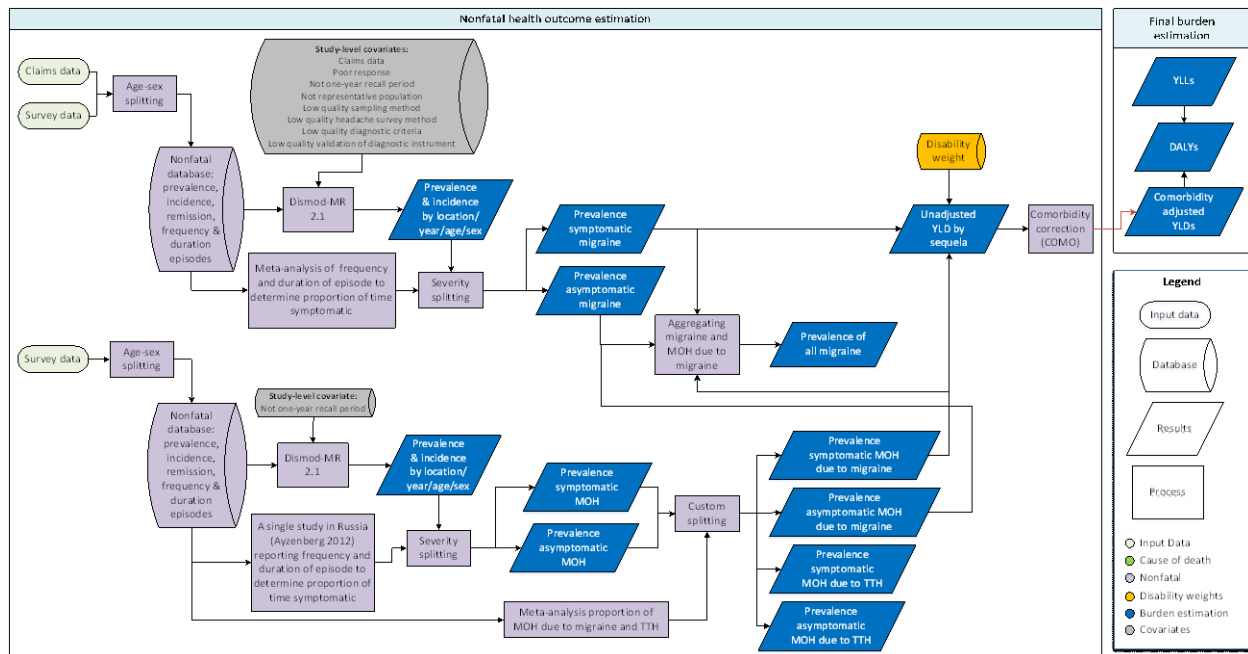

## Case definition

Migraine is a class of disabling primary headache disorders, characterized by recurrent unilateral pulsatile headaches. The two major subtypes are common migraine (without aura) and classic migraine (with aura or neurological symptoms). In GBD we do not distinguish subtypes as most epidemiological studies report on overall migraine only. The ICD-10 code for migraine is G43 and ICD-9 code is 346.

Migraine is due to medication overuse headache (MOH) when the additional International Classification of Headache Disorders (ICHD) diagnostic criteria for MOH are met. The criteria are:

- Headache present on  $\geq 15$  days/month fulfilling criteria C and D
- Regular overuse (ie,  $> 2$  days per week) for  $\geq 3$  months of one or more drugs that can be taken for acute and/or symptomatic treatment of headache
- Headache has developed or markedly worsened during medication overuse
- Headache resolves or reverts to its previous pattern within 2 months after discontinuation of overused medication

It also explicitly states that if a person qualifies for chronic migraine or chronic tension-type headache (TTH) as well as MOH, both diagnoses should be given. However, our GBD headache collaborators, Steiner and Stovner, say that in survey practice, a screening question on chronic headache is used first,

followed by questions to determine if medication overuse headache is probable (ie, fitting all criteria but criterion D).

Only one study used in GBD was able to meet criterion D making a final diagnosis after a trial of detoxification. Of 25 cases with probably MOH, 15 were confirmed as MOH.

## Input data

### *Model inputs*

A systematic reviews of migraine and MOH were conducted for GBD 2010 and updated for GBD 2013. In GBD 2015, three new representative surveys conducted by GBD collaborators in Norway; Karnataka, India; and Nepal were added. In GBD 2016, four new representative surveys conducted by GBD collaborators in Ethiopia, Germany, Denmark, and Sweden were included for migraine, and two surveys in Norway and Ethiopia were included for MOH.

Inclusion criteria of the systematic reviews were:

- Representative, population-based surveys
- Reporting of prevalence of migraine headache

In addition, US claims data for 2000, 2010, and 2012 by US state were used.

The table below illustrates the geographic distribution of migraine data.

|                                 | Prevalence | Incidence | Remission | Frequency and duration episodes |
|---------------------------------|------------|-----------|-----------|---------------------------------|
| Studies                         | 123        | 4         | 1         | 16                              |
| Countries/subnational locations | 113        | 4         | 1         | 16                              |
| GBD world regions               | 16         | 2         | 1         | 9                               |

The table below shows the geographic distribution of MOH data.

|                                 | Prevalence | Incidence | Remission |
|---------------------------------|------------|-----------|-----------|
| Studies                         | 26         | 0         | 7         |
| Countries/subnational locations | 20         | 0         | 5         |
| GBD world regions               | 8          | 0         | 1         |

### *Severity splits*

To determine the proportion of time over a year spent in an episode of migraine headache, 16 studies providing data on the frequency of episodes and the average duration of episodes were meta-analyzed. As these studies reported frequency and duration of episodes by disparate categories, an assumption was made that the mean represented each category. For each study the estimated proportion of time symptomatic is 0.085 (0.058–0.112).

The basis of GBD disability weight (DW) survey assessments are lay descriptions of sequelae highlighting major functional consequences and symptoms. The lay description and DW for migraine are shown below.

| Severity level | Lay description                                                                                                                                                                                 | DW (95% CI)         |
|----------------|-------------------------------------------------------------------------------------------------------------------------------------------------------------------------------------------------|---------------------|
| Mild           | This person has severe, throbbing head pain, and nausea that cause great difficulty in daily activities and sometimes confine the person to bed. Moving around, light, and noise make it worse. | 0.434 (0.285–0.603) |

## Modelling strategy

We used a list of binary covariates which are a modified version of quality indicators of epidemiological studies on headache (Steiner TJ, Stovner LJ et al [2013]. Improving quality in population surveys of headache prevalence, burden, and cost: key methodological considerations. *J Headache Pain*, 14: 87) and shown in the table below.

| Study covariate                                   | Notation                                                                                                                                                                                                                         |                                                                                                                                                                                      |
|---------------------------------------------------|----------------------------------------------------------------------------------------------------------------------------------------------------------------------------------------------------------------------------------|--------------------------------------------------------------------------------------------------------------------------------------------------------------------------------------|
|                                                   | Less desirable (1)                                                                                                                                                                                                               | Reference (zero)                                                                                                                                                                     |
| Other than one-year recall period                 | Point prevalence                                                                                                                                                                                                                 | One-year prevalence                                                                                                                                                                  |
| Not representative                                | Selected population                                                                                                                                                                                                              | General population or community-based sample from whole country OR general population or community-based sample from defined region within a country, or school-based (for children) |
| Low-quality sampling method                       | Not stated OR no (or failed) attempt to secure representativeness                                                                                                                                                                | Total defined population, or random sample corrected for population demographics OR random sample uncorrected for population demographics                                            |
| Poor response                                     | Not stated, or <70%                                                                                                                                                                                                              | 70–100%                                                                                                                                                                              |
| Low-quality survey method and type of interviewer | Not stated OR self-administered (unsupervised) questionnaire OR telephone or face-to-face interview by untrained or unspecified interviewer(s)                                                                                   | Face-to-face interview with headache expert                                                                                                                                          |
| Low-quality validation of diagnostic instrument   | Instrument not specified or not validated OR validated, but sensitivity and/or specificity <70% OR validated only in screen-positive sub-sample, or in clinic or unspecified sample, but sensitivity and specificity $\geq 70\%$ | Validated in target population or similar, and sensitivity and specificity $\geq 70\%$ , or all diagnoses made in face-to-face or telephone interviews by headache expert            |
| Low-quality diagnostic criteria                   | Not stated OR stated, other than ICHD OR ICHD (or reasonable modification)                                                                                                                                                       | ICHD (or reasonable modification)                                                                                                                                                    |

We added separate covariates for lifetime recall and three years of claims data from MarketScan (2000, 2010, and 2012).

Prior settings in the DisMod model included setting incidence to 0 before age 5 based on expert advice. We also assume no excess mortality due to migraine. Remission rate is set to be between 0 and 0.1.

All study covariates were initially evaluated as x-cov (which means that data points are adjusted to the reference value if a systematic bias is detected); those that did not have a significant coefficient, were entered as z-cov (which means that a multiplier is applied to the standard error of such data points to indicate they are less certain values because they did not meet the reference criteria for study quality). The table below shows the fixed effect values of the x-covs which are in log space (as DisMod uses an offset lognormal model) as well as the exponentiated values which for an x-cov can be interpreted as an odds ratio.

Only the covariate for low quality survey method and type of interviewer, poor response and three years of claim data remain as x-covs.

The covariates for other than one-year recall period, low-quality sampling method, low-quality diagnostic criteria, low-quality validation of diagnostic instrument, and not representative studies had non-significant coefficients as a x-cov and were subsequently used as z-covs.

| Study covariate                                   | Parameter  | beta   | Exponentiated beta    |
|---------------------------------------------------|------------|--------|-----------------------|
| Low quality survey method and type of interviewer | Prevalence | 0.09   | 1.09 (0.99 – 1.19)    |
| Poor response                                     | Prevalence | - 0.25 | 0.78 (0.71 – 0.85)    |
| Claims data US 2000                               | Prevalence | - 2.45 | 0.086 (0.082 – 0.095) |
| Claims data US 2010                               | Prevalence | - 2.07 | 0.13 (0.12 – 0.14)    |
| Claims data US 2012                               | Prevalence | - 1.97 | 0.14 (0.13 – 0.15)    |

MOH is initially modelled separately in DisMod, then we include MOH prevalence due to migraine as a sequela of migraine. Prior settings in the DisMod model included setting incidence to 0 before age 5 based on expert advice. We also assume no excess mortality due to MOH. Based on the seven literatures on remission (listed in references below), we set bounds of the remission to be between 0 and 0.4

All study covariates for MOH are evaluated using the same strategy as modelling for migraine.

The study with recall period other than one year was the only covariate used as a x-covariate; however, its coefficient was insignificant: beta = -0.19 and exponentiated beta = 0.83 (0.66 – 1.04). The others were subsequently used as z-covariates.

| Study covariate                 | Parameter  | beta  | Exponentiated beta |
|---------------------------------|------------|-------|--------------------|
| Low-quality diagnostic criteria | Prevalence | 0.24  | 1.27 (1.05–1.59)   |
| Poor response                   | Prevalence | -0.64 | 0.53 (0.42–0.65)   |

In GBD 2015, to the prevalence output from DisMod, we first applied the finding from da Silva (2010) that 60% (40.8–79.2%) of “probable” cases were confirmed cases of MOH. However, headache collaborators have argued that this would leave the 40% unaccounted for, as surveys first ask about chronic headache and those on medication before applying criteria for those with migraine and TTH. Thus, in GBD 2016, we



no longer multiplied the 60% (40.8–79.2%) to the prevalence from DisMod; ie, consider all the “probable” cases as MOH cases. For the severity split, we estimate the proportion of time “symptomatic,” ie, with headache, from the Ayzenberg (2012) estimate of 23.1 days a month with headache and multiply estimates by 75.9% (72.9–78.8%).

In addition, we multiplied 73% (64–82%) to the symptomatic MOH prevalence to be symptomatic MOH due to migraine and the rest of the prevalent cases are symptomatic MOH due to TTH.

## References

- Colas R, Munoz P, Temprano R, Gomez C, Pascual J. Chronic daily headache with analgesic overuse: Epidemiology and impact on quality of life. *Neurology*. 2004; 62(8): 1338-42.
- Katsarava Z, Muessig M, Dzagnidze A, Fritsche G, Diener HC, Limmroth V. Medication overuse headache: rates and predictors for relapse in a 4-year prospective study. *Cephalalgia*. 2005; 25(1): 12-5.
- Jonsson P, Hedenrud T, Linde M. Epidemiology of medication overuse headache in the general Swedish population. *Cephalalgia*. 2011; 31(9): 1015-22.

## New studies on remission from medication overuse headache

- Fontanillas N, Colás R, Muñoz P, Oterino A, Pascual J. Long-term evolution of chronic daily headache with medication overuse in the general population. *Headache*. 2010; 50(6): 981-8.
- Pini LA, Cicero AF, Sandrini M. Long-term follow-up of patients treated for chronic headache with analgesic overuse. *Cephalalgia*. 2001; 21(9): 878-83.
- Suhr B, Evers S, Bauer B, Gralow I, Grotemeyer KH, Husstedt IW. Drug-induced headache: long-term results of stationary versus ambulatory withdrawal therapy. *Cephalalgia*. 1999; 19(1): 44-9.
- Katsarava Z, Muessig M, Dzagnidze A, Fritsche G, Diener HC, Limmroth V. Medication overuse headache: rates and predictors for relapse in a 4-year prospective study. *Cephalalgia*. 2005; 25(1): 12-5.
- Schnider P, Aull S, Baumgartner C, Marterer A, Wöber C, Zeiler K, Wessely P. Long-term outcome of patients with headache and drug abuse after inpatient withdrawal: five-year follow-up. *Cephalalgia*. 1996; 16(7): 481-5.
- Tribl GG, Schnider P, Wöber C, Aull S, Auterith A, Zeiler K, Wessely P. Are there predictive factors for long-term outcome after withdrawal in drug-induced chronic daily headache?. *Cephalalgia*. 2001; 21(6): 691-6.
- Hagen K, Albrechtsen C, Vilming ST, Salvesen R, Grønning M, Helde G, Gravdahl G, Zwart JA, Stovner LJ. A 4-year follow-up of patients with medication-overuse headache previously included in a randomized multicentre study. *J Headache Pain*. 2011; 12(3): 315-22.

# Tension-type Headache

## Flowchart

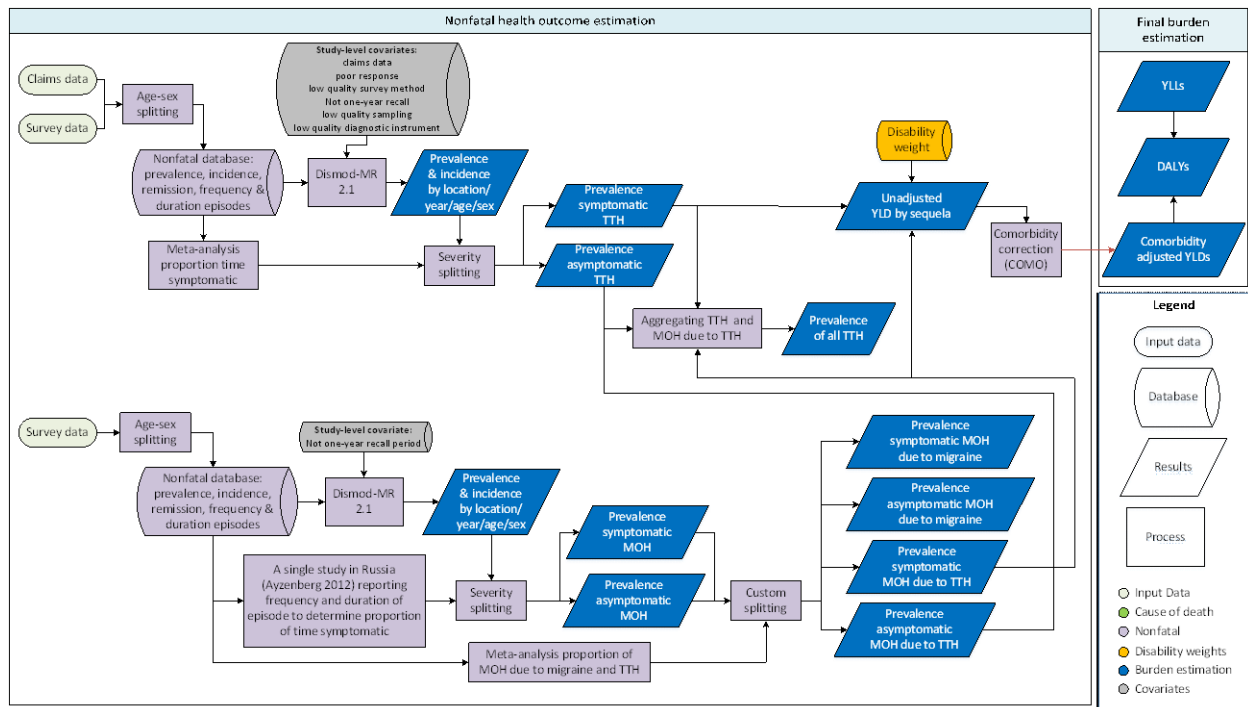

## Case definition

Tension-type headache (TTH) is characterized by a dull, non-pulsatile, diffuse, band-like (or vice-like) pain of mild to moderate intensity in the head, scalp, or neck. The ICD-10 code for migraine is G44.2 and the ICD-9 code is 339.1.

TTH is due to medication overuse headache (MOH) when the additional International Classification of Headache Disorders (ICHD) diagnostic criteria for MOH are met. The criteria are:

- E. Headache present on  $\geq 15$  days/month fulfilling criteria C and D
- F. Regular overuse (ie,  $> 2$  days per week) for  $\geq 3$  months of one or more drugs that can be taken for acute and/or symptomatic treatment of headache
- G. Headache has developed or markedly worsened during medication overuse
- H. Headache resolves or reverts to its previous pattern within 2 months after discontinuation of overused medication

It also explicitly states that if a person qualifies for chronic migraine or chronic TTH as well as MOH, both diagnoses should be given. However, our headache GBD collaborators, Steiner and Stovner, say that in

survey practice, a screening question on chronic headache is used first, followed by questions to determine if medication overuse headache is probable (ie, fitting all criteria but criterion D).

Only one study used in GBD was able to meet criterion D making a final diagnosis after a trial of detoxification. Of 25 cases with probable MOH, 15 were confirmed as MOH.

## Input data

### *Model Inputs*

A systematic review of TTH was conducted for GBD 2010 and updated for GBD 2013. In GBD 2015 three new representative surveys conducted by GBD collaborators in Norway; Karnataka, India; and Nepal were added. In GBD 2016, two new representative surveys conducted by GBD collaborators in Ethiopia and Germany were added. Inclusion criteria of the systematic reviews were:

- Representative, population-based surveys
- Reporting of prevalence of TTH headache

In addition, US claims data for 2000, 2010, and 2012 by US state were included.

The table below illustrates the geographic distribution of TTH data.

|                                 | Prevalence | Incidence | Remission | Frequency and duration episodes |
|---------------------------------|------------|-----------|-----------|---------------------------------|
| Studies                         | 86         | 1         | 0         | 9                               |
| Countries/subnational locations | 103        | 1         | 0         | 7                               |
| GBD world regions               | 15         | 1         | 0         | 6                               |

The table below shows the geographic distribution of MOH data.

|                                 | Prevalence | Incidence | Remission |
|---------------------------------|------------|-----------|-----------|
| Studies                         | 26         | 0         | 7         |
| Countries/subnational locations | 20         | 0         | 5         |
| GBD world regions               | 8          | 0         | 1         |

### *Severity splits*

To determine the proportion of time over a year spent in an episode of TTH headache, nine studies providing data on the frequency of episodes and the average duration of episodes were meta-analyzed. As these studies reported frequency and duration of episodes by disparate categories, an assumption was made that the mean represented each category. The estimated proportion of time symptomatic is 0.058 (0.023–0.092).

The basis of GBD disability weight (DW) survey assessments are lay descriptions of sequelae highlighting major functional consequences and symptoms. The lay description and DW for TTH are shown below.

|                |                                                                                                             |                     |
|----------------|-------------------------------------------------------------------------------------------------------------|---------------------|
| Severity level | Lay description                                                                                             | DW (95% CI)         |
| Mild           | This person has a moderate headache that also affects the neck, which causes difficulty in daily activities | 0.036 (0.023–0.053) |

## Modelling strategy

We used a list of binary covariates which are a modified version of quality indicators of epidemiological studies on headache (Steiner TJ, Stovner LJ et al (2013). Improving quality in population surveys of headache prevalence, burden and cost: key methodological considerations. *J Headache Pain*, 14: 87) and shown in the table below.

| Study covariate                                   | Notation                                                                                                                                                                                                                         |                                                                                                                                                                                      |
|---------------------------------------------------|----------------------------------------------------------------------------------------------------------------------------------------------------------------------------------------------------------------------------------|--------------------------------------------------------------------------------------------------------------------------------------------------------------------------------------|
|                                                   | Less desirable (1)                                                                                                                                                                                                               | Reference (zero)                                                                                                                                                                     |
| Other than one-year recall period                 | Point prevalence                                                                                                                                                                                                                 | One-year prevalence                                                                                                                                                                  |
| Not representative                                | selected population                                                                                                                                                                                                              | general population or community-based sample from whole country OR general population or community-based sample from defined region within a country, or school-based (for children) |
| Low-quality sampling method                       | not stated OR no (or failed) attempt to secure representativeness                                                                                                                                                                | total defined population, or random sample corrected for population demographics OR random sample uncorrected for population demographics                                            |
| Poor response                                     | not stated, or <70%                                                                                                                                                                                                              | 70–100%                                                                                                                                                                              |
| Low-quality survey method and type of interviewer | not stated OR self-administered (unsupervised) questionnaire OR telephone or face-to-face interview by untrained or unspecified interviewer(s)                                                                                   | face-to-face interview with headache expert                                                                                                                                          |
| Low-quality validation of diagnostic instrument   | instrument not specified or not validated OR validated, but sensitivity and/or specificity <70% OR validated only in screen-positive sub-sample, or in clinic or unspecified sample, but sensitivity and specificity $\geq 70\%$ | validated in target population or similar, and sensitivity and specificity $\geq 70\%$ , or all diagnoses made in face-to-face or telephone interviews by headache expert            |
| Low-quality diagnostic criteria                   | not stated OR stated, other than ICHD OR ICHD (or reasonable modification)                                                                                                                                                       | ICHD (or reasonable modification)                                                                                                                                                    |

We added separate covariates for chronic headache, lifetime recall and the three years of claims data from MarketScan (2000, 2010, and 2012).

Prior settings in the DisMod model included setting incidence to 0 before age 5 based on expert advice. We also assume no excess mortality due to TTH. In the absence of any data on remission we set bounds between 0 and 0.5, ie, ensuring an average duration of at least two years.

All study covariates were initially evaluated as x-cov (which means that data points are adjusted to the reference value if a systematic bias is detected); those that did not have a significant coefficient were entered as z-cov (which means that a multiplier is applied to the standard error of such data points to indicate they are less certain values because they did not meet the reference criteria for study quality). The table below shows the fixed-effect values of the x-covs which are in log space (as DisMod uses an offset lognormal model) as well as the exponentiated values which for a x-cov can be interpreted as an odds ratio.

The covariate for other than one-year recall period and not representative had non-significant coefficients as a x-cov and were subsequently used as a z-cov.

| Study covariate     | Parameter  | beta   | Exponentiated beta    |
|---------------------|------------|--------|-----------------------|
| Chronic headache    | Prevalence | -0.37  | 0.69 (0.41 – 0.98)    |
| Recall lifetime     | Prevalence | 0.74   | 2.09 (1.36 – 2.69)    |
| Claims data US 2000 | Prevalence | - 4.49 | 0.011 (0.011 – 0.011) |
| Claims data US 2010 | Prevalence | - 4.12 | 0.016 (0.016 – 0.017) |
| Claims data US 2012 | Prevalence | - 4.00 | 0.018 (0.018 – 0.019) |

The very low coefficients in claims data mean that few cases of TTH are included in claims data. Data points were crosswalked up by a factor 50 or more. We decided to include the data with such large crosswalks as we had no other data for the states of the USA and the crosswalks estimated by DisMod were within range of the data from three US studies in Massachusetts, Maryland, and Kentucky.

MOH is initially modelled separately in DisMod, then we include the MOH prevalence due to TTH as a sequela of TTH. Prior settings in the DisMod model included setting incidence to 0 before age 5 based on expert advice. We also assume no excess mortality due to MOH. Based on seven literature sources on remission (listed in references below), we set bounds of the remission to be between 0 and 0.4.

All study covariates for MOH are evaluated using the same strategy as modelling for TTH.

The study with recall period other than one year was the only covariate used as a x-covariate; however, its coefficient was insignificant: beta = -0.19 and exponentiated beta = 0.83 (0.66 – 1.04). The others were subsequently used as z-covariates.

In GBD 2015, to the prevalence output from DisMod, we first applied the finding from da Silva (2010) that 60% (40.8–79.2) of “probable” cases were confirmed cases of MOH. However, headache collaborators have argued that this would leave the 40% unaccounted for, as surveys first ask about chronic headache and those on medication before applying criteria for those with migraine and TTH. Thus, in GBD 2016, we no longer multiplied the 60% (40.8–79.2) to the prevalence from DisMod; ie, consider all the “probable” cases as MOH cases. For the severity split, we estimate the proportion of time “symptomatic,” ie, with headache from the Ayzenberg (2012) estimate of 23.1 days a month with headache and multiply estimates by 75.9% (72.9–78.8).

In addition, we multiplied 73% (64–82) to the symptomatic MOH prevalence to be symptomatic MOH due to migraine and the rest of the prevalent cases are symptomatic MOH due to TTH.

#### References

- Colas R, Munoz P, Temprano R, Gomez C, Pascual J. Chronic daily headache with analgesic overuse: Epidemiology and impact on quality of life. *Neurology*. 2004; 62(8): 1338-1342.
- Katsarava Z, Muessig M, Dzagnidze A, Fritsche G, Diener HC, Limmroth V. Medication overuse headache: rates and predictors for relapse in a 4-year prospective study. *Cephalalgia*. 2005; 25(1): 12-15.
- Jonsson P, Hedenrud T, Linde M. Epidemiology of medication overuse headache in the general Swedish population. *Cephalalgia*. 2011; 31(9): 1015-1022.

#### New studies on remission from medication overuse headache

- Fontanillas N, Colás R, Muñoz P, Oterino A, Pascual J. Long-term evolution of chronic daily headache with medication overuse in the general population. *Headache*. 2010; 50(6): 981-8.
- Pini LA, Cicero AF, Sandrini M. Long-term follow-up of patients treated for chronic headache with analgesic overuse. *Cephalalgia*. 2001; 21(9): 878-83.
- Suhr B, Evers S, Bauer B, Gralow I, Grotemeyer KH, Husstedt IW. Drug-induced headache: long-term results of stationary versus ambulatory withdrawal therapy. *Cephalalgia*. 1999; 19(1): 44-9.
- Katsarava Z, Muessig M, Dzagnidze A, Fritsche G, Diener HC, Limmroth V. Medication overuse headache: rates and predictors for relapse in a 4-year prospective study. *Cephalalgia*. 2005; 25(1): 12-5.
- Schnider P, Aull S, Baumgartner C, Marterer A, Wöber C, Zeiler K, Wessely P. Long-term outcome of patients with headache and drug abuse after inpatient withdrawal: five-year follow-up. *Cephalalgia*. 1996; 16(7): 481-5.
- Tribl GG, Schnider P, Wöber C, Aull S, Auterith A, Zeiler K, Wessely P. Are there predictive factors for long-term outcome after withdrawal in drug-induced chronic daily headache?. *Cephalalgia*. 2001; 21(6): 691-6.
- Hagen K, Albretsen C, Vilming ST, Salvesen R, Grønning M, Helde G, Gravidahl G, Zwart JA, Stovner LJ. A 4-year follow-up of patients with medication-overuse headache previously included in a randomized multicentre study. *J Headache Pain*. 2011; 12(3): 315-22.

# Motor Neuron Diseases

## Flowchart

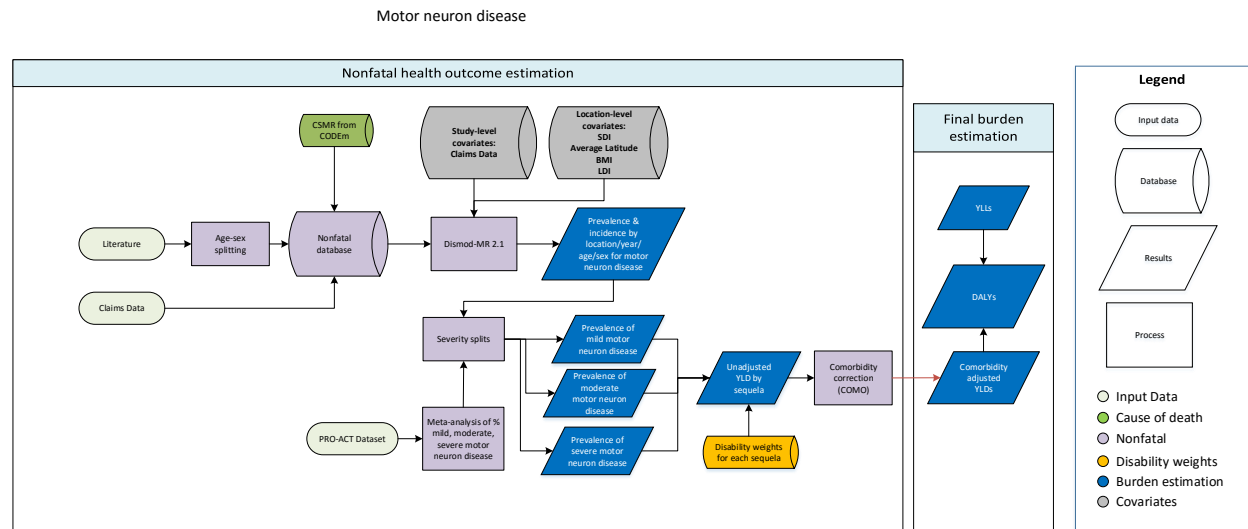

## Case definition

Motor neuron diseases (MND) are a set of chronic, degenerative, and progressive neurological conditions typified by the destruction of motor neurons and the subsequent deterioration of voluntary muscle activity. The most common MND is amyotrophic lateral sclerosis. The ICD-10 code corresponding to motor neuron diseases is G12. Our gold standard diagnostic criteria are the El Escorial Criteria, with other similar criteria (eg, the original set from World Federation of Neurology) if necessary.

## Input data

A full systematic review was conducted for GBD 2015. The following search string guided our search, which resulted in 3,146 hits with 58 sources meeting extraction criteria: (1) the study is a representative population-based study, (2) reports on prevalence, incidence, remission, excess mortality, relative risk of mortality, standardized mortality ratio, or with-condition mortality rate. Studies with no clearly defined sample were excluded.

*('motor neuron disease'[MeSH Terms] OR ('motor'[All Fields] AND 'neuron'[All Fields] AND 'disease'[All Fields]) OR 'motor neuron disease'[All Fields] OR ('motor'[All Fields] AND 'neuron'[All Fields] AND 'diseases'[All Fields]) OR 'motor neuron diseases'[All Fields]) OR ('amyotrophic lateral sclerosis'[MeSH Terms] OR ('amyotrophic'[All Fields] AND 'lateral'[All Fields] AND 'sclerosis'[All Fields]) OR 'amyotrophic lateral sclerosis'[All Fields]) OR ALS[All Fields] OR ('motor neuron disease'[MeSH Terms] OR ('motor'[All Fields] AND 'neuron'[All Fields] AND 'disease'[All Fields]) OR 'motor neuron disease'[All Fields] OR ('primary'[All Fields] AND 'lateral'[All Fields] AND 'sclerosis'[All Fields]) OR 'primary lateral sclerosis'[All Fields]) OR ('Politics Life Sci'[Journal] OR 'pls'[All Fields]) OR ('muscular atrophy, spinal'[MeSH Terms] OR ('muscular'[All Fields] AND 'atrophy'[All Fields] AND 'spinal'[All Fields]) OR 'spinal muscular atrophy'[All Fields] OR ('progressive'[All Fields] AND 'muscular'[All Fields] AND 'atrophy'[All Fields]) OR 'progressive muscular atrophy'[All Fields]) OR PBP[All Fields] OR ('pseudobulbar palsy'[MeSH Terms] OR*

*('pseudobulbar'[All Fields] AND 'palsy'[All Fields]) OR 'pseudobulbar palsy'[All Fields]) AND ('epidemiology'[Subheading] OR 'epidemiology'[All Fields] OR 'epidemiology'[MeSH Terms]) OR population-based[All Fields]*

The following table provides an overview of the density and distribution of the data used for GBD 2016.

|                             | Prevalence | Incidence | Mortality risk |
|-----------------------------|------------|-----------|----------------|
| Studies                     | 11         | 47        | 3              |
| Countries/subnational units | 57         | 46        | 3              |
| Regions                     | 5          | 7         | 2              |

Beyond the literature data, we also make use of claims data from the United States for 2000, 2010, and 2012. Descriptions of the source and preparation of this data are provided elsewhere.

Except for excluding studies using non-representative populations, there are no substantial adjustments or outlier criteria for the MND model. Certain studies have been outliered on a case-by-case basis due to subsequent review and exclusion due to inappropriateness of the study design and case definition.

### Severity splits

To calculate severity and disability due to MND we analyzed a dataset from Pooled Resource Open-access ALS Clinical Trials (PRO-ACT). This dataset contains the largest ALS clinical trials dataset, with a total of 8,635 ALS patient records from multiple completed clinical trials. Among these, we conducted the final analysis with n=4838 (56%) of the patients with complete ALS Function Rating Score (ALSFRS) with average follow-up time of 184 days (min: -22, max: 648), in which 2,999 (62%) received experimental (medication) treatments and 1,301 (27%) received placebo (in these trials, the medications tested were found to be no better than placebo with respect to their effects on ALS progressions).

The ALSFRS is an instrument for evaluating the functional status of patients with Amyotrophic Lateral Sclerosis. It can be used to monitor functional changes in a patient over time. It measures (1) speech, (2) salivation, (3) swallowing, (4) handwriting, (5) cutting food and handling utensils (with or without gastrostomy), (6) dressing and hygiene, (7) turning in bed and adjusting bed clothes, (8) walking, (9) climbing stairs, and (10) breathing. Each task is rated on a 5-point scale from 0 = can't do, to 4 = normal ability. Individual item scores are summed to produce a reported total score of between 0 and 40 (worst to best). ALSFRS has been revised to ALSFRS-R, which includes 12 questions (ALSFRS Q10 changes to (10) Dyspnea, (11) Orthopnea, and (12) Respiratory insufficiency), with individual item scores summed to a score between 0 and 48.

In order to eliminate any bias from the treatment effects on the ALSFRS, only the first observation at the time of trial is selected. If the first observation is missing at the time of trial (or prior), the next non-missing observation is selected to be included in the final analysis.

We subsequently mapped ALSFRS scores into GBD severities, and sequelae into different combinations of speech problems, chronic obstructive pulmonary disease, and motor impairment using the following logic:

#### Motor impairment



The ALSFRS assess motor function of the legs through questions on walking (Q8) and stair climbing (Q9).

| Combined score | Severity level |
|----------------|----------------|
| 8              | None           |
| 5-7            | Mild           |
| 2-4            | Moderate       |
| 0-1            | Severe         |

The ALSFRS also assesses motor impairment through questions on handwriting (Q4), cutting food and handling utensils (Q5), and dressing and hygiene (Q6).

| Combined score | Severity level |
|----------------|----------------|
| 12             | None           |
| 9-11           | Mild           |
| 3-8            | Moderate       |
| 0-2            | Severe         |

After determining case severity on these two separate metrics, we aggregate by taking the most severe ranking (eg, severe + mild = a severe case).

### Respiratory problems:

Question 10 of the ALSFRS describes breathing difficulty as a function of MND.

| ALSFRS score | Description                                                      | Severity level |
|--------------|------------------------------------------------------------------|----------------|
| 4            | Normal                                                           | None           |
| 3            | Shortness of breath with minimal exertion                        | Mild           |
| 2            | Shortness of breath at rest                                      | Moderate       |
| 0-1          | Intermittent ventilator assistance required/ventilator-dependent | Severe         |

### Speech problems

Speech impairment due to MND is derived from ALSFRS question 1, which describes speech impediments. A score of 4 on this question denotes no impairment, while all other values suggest some impairment.

### Creating sequelae

After determining the severity status of each case for the three symptom umbrellas, we subsequently estimated the relative proportion of each combination of symptom class and their respective severities. Those without any symptoms (eg, no severity) were categorized as having worry about the diagnosis for disability estimation. The following table displays the various sequelae and their associated proportions.

| Sequela | Proportion (Mean) | Proportion (Lower) | Proportion (Upper) |
|---------|-------------------|--------------------|--------------------|
|---------|-------------------|--------------------|--------------------|

|                                                                                                          |         |         |         |
|----------------------------------------------------------------------------------------------------------|---------|---------|---------|
| Mild motor impairment, mild respiratory problems and speech problems due to motor neuron disease         | 0.01779 | 0.01658 | 0.01909 |
| Mild motor impairment, moderate respiratory problems and speech problems due to motor neuron disease     | 0.00270 | 0.00225 | 0.00324 |
| Mild motor impairment, severe respiratory problems and speech problems due to motor neuron disease       | 0.00082 | 0.00059 | 0.00113 |
| Mild motor impairment, and speech problems due to motor neuron disease                                   | 0.02052 | 0.01922 | 0.02190 |
| Moderate motor impairment, mild respiratory problems and speech problems due to motor neuron disease     | 0.03377 | 0.03210 | 0.03552 |
| Moderate motor impairment, moderate respiratory problems and speech problems due to motor neuron disease | 0.00715 | 0.00640 | 0.00799 |
| Moderate motor impairment, severe respiratory problems and speech problems due to motor neuron disease   | 0.00286 | 0.00240 | 0.00342 |
| Moderate motor impairment, and speech problems due to motor neuron disease                               | 0.03041 | 0.02883 | 0.03208 |
| Severe motor impairment, mild respiratory problems and speech problems due to motor neuron disease       | 0.05242 | 0.05035 | 0.05457 |
| Severe motor impairment, moderate respiratory problems and speech problems due to motor neuron disease   | 0.02247 | 0.02111 | 0.02392 |
| Severe motor impairment, severe respiratory problems and speech problems due to motor neuron disease     | 0.01365 | 0.01259 | 0.01479 |
| Severe motor impairment and speech problems due to motor neuron disease                                  | 0.04765 | 0.04567 | 0.04970 |
| Mild respiratory problems and speech problems due to motor neuron disease                                | 0.01157 | 0.01060 | 0.01263 |
| Moderate respiratory problems and speech problems due to motor neuron disease                            | 0.00142 | 0.00111 | 0.00182 |
| Severe respiratory problems and speech problems due to motor neuron disease                              | 0.00023 | 0.00013 | 0.00043 |
| Speech problems due to motor neuron disease                                                              | 0.02457 | 0.02315 | 0.02608 |
| Mild motor impairment and mild respiratory problems due to motor neuron disease                          | 0.02245 | 0.02109 | 0.02389 |
| Mild motor impairment and moderate respiratory problems due to motor neuron disease                      | 0.00275 | 0.00230 | 0.00329 |
| Mild motor impairment and severe respiratory problems due to motor neuron disease                        | 0.00068 | 0.00047 | 0.00097 |
| Mild motor impairment due to motor neuron disease                                                        | 0.10388 | 0.10103 | 0.10681 |
| Moderate motor impairment and mild respiratory problems due to motor neuron disease                      | 0.06744 | 0.06511 | 0.06985 |
| Moderate motor impairment and moderate respiratory problems due to motor neuron disease                  | 0.01302 | 0.01199 | 0.01413 |
| Moderate motor impairment and severe respiratory problems due to motor neuron disease                    | 0.00412 | 0.00356 | 0.00477 |
| Moderate motor impairment due to motor neuron disease                                                    | 0.20136 | 0.19760 | 0.20518 |

|                                                                                       |         |         |         |
|---------------------------------------------------------------------------------------|---------|---------|---------|
| Severe motor impairment and mild respiratory problems due to motor neuron disease     | 0.06902 | 0.06666 | 0.07146 |
| Severe motor impairment and moderate respiratory problems due to motor neuron disease | 0.02000 | 0.01872 | 0.02137 |
| Severe motor impairment and severe respiratory problems due to motor neuron disease   | 0.01062 | 0.00969 | 0.01163 |
| Severe motor impairment due to motor neuron disease                                   | 0.15037 | 0.14702 | 0.15378 |
| Mild respiratory problems due to motor neuron disease                                 | 0.00643 | 0.00571 | 0.00723 |
| Moderate respiratory problems due to motor neuron disease                             | 0.00044 | 0.00028 | 0.00069 |
| Severe respiratory problems due to motor neuron disease                               | 0.00005 | 0.00001 | 0.00017 |
| Asymptomatic, but worry about diagnosis due to motor neuron disease                   | 0.03738 | 0.03562 | 0.03921 |

To determine disability due to these sequelae, we use the standard multiplicative aggregation formula as described in the main text. The following table provides description and disability weight assigned to the sequelae as appropriate.

| Symptom group        | Severity level | Lay description                                                                                                                                                                           | DW (95%)               |
|----------------------|----------------|-------------------------------------------------------------------------------------------------------------------------------------------------------------------------------------------|------------------------|
| Respiratory problems | Asymptomatic   |                                                                                                                                                                                           |                        |
| Respiratory problems | Mild           | Has cough and shortness of breath after heavy physical activity, but is able to walk long distances and climb stairs.                                                                     | 0.019<br>(0.011–0.033) |
| Respiratory problems | Moderate       | Has cough, wheezing, and shortness of breath, even after light physical activity. The person feels tired and can walk only short distances or climb only a few stairs.                    | 0.225<br>(0.153–0.31)  |
| Respiratory problems | Severe         | Has cough, wheezing, and shortness of breath all the time. The person has great difficulty walking even short distances or climbing any stairs, feels tired when at rest, and is anxious. | 0.408<br>(0.273–0.556) |
| Motor impairment     | Asymptomatic   |                                                                                                                                                                                           |                        |
| Motor impairment     | Mild           | Has some difficulty in moving around but is able to walk without help.                                                                                                                    | 0.01<br>(0.005–0.019)  |
| Motor impairment     | Moderate       | Has some difficulty in moving around and difficulty in lifting and holding objects, dressing, and sitting upright, but is able to walk without help.                                      | 0.061<br>(0.04–0.089)  |
| Motor impairment     | Severe         | Is unable to move around without help, and is not able to lift or hold objects, get dressed, or sit upright.                                                                              | 0.402<br>(0.268–0.545) |

|                         |     |                                                                                                |                        |
|-------------------------|-----|------------------------------------------------------------------------------------------------|------------------------|
| Speech problems         | No  |                                                                                                |                        |
| Speech problems         | Yes | Has difficulty speaking, and others find it difficult to understand.                           | 0.051<br>(0.032–0.078) |
| Asymptomatic, but worry | Yes | Has a disease diagnosis that causes some worry but minimal interference with daily activities. | 0.012<br>(0.006–0.023) |

## Modelling strategy

We use DisMod 2.1 as the main analytical tool for MND estimation. Prior settings are limited to 0 remission at all ages. We also constrain the super-region random effects for prevalence and incidence to -0.5 and 0.5 to account for spurious inflation of regional differences.

Claims data for 2000 and 2010 are adjusted via study covariates to account for systematically low estimates relative to the 2012 claims data. Implicit in this adjustment is the assumption that variation between years of claims data is a function of data collection inconsistencies and noise.

Similar to other cases we use GBD estimates of cause-specific mortality rate (CSMR) and Excess Mortality Rate (EMR) in this model. The source and estimation of these rates are discussed elsewhere.

To assist the estimation process we use several country-level covariates.

| Covariate                          | Measure               | Beta                       | Exponentiated         |
|------------------------------------|-----------------------|----------------------------|-----------------------|
| Absolute value of average latitude | prevalence            | .014<br>(.012 - .016)      | 1.01<br>(1.01 - 1.02) |
| LDI (I\$ per capita)               | excess mortality rate | -.5<br>(-.5 - -.5)         | .61<br>(.61 - .61)    |
| All MarketScan, year 2010          | prevalence            | -.017<br>(-.038 - -.0014)  | .98<br>(.96 - 1.00)   |
| All MarketScan, year 2000          | prevalence            | -.026<br>(-0.054 - -.0037) | .97<br>(.95 - 1.00)   |

Although there are no known cures for MND, we expect disease management to differ globally – largely as a function of available resources. To capture this, we use the natural log of lagged distributed income per capita as a proxy to capture this relationship in the estimation of excess mortality.

As described in the literature, extreme latitude may be associated with higher prevalence and incidence of motor neuron disease. While the pathway that affects motor neuron disease is not fully understood, our results suggest a relationship. Our operationalization of latitude is created by a population-weighted average of latitude by country and taking the absolute value. The underlying population distribution rasters are part of the Gridded Population of the World dataset.

## Other neurological disorders

In addition to the neurological disorders described above, there are many diverse types of neurological disorders with a range of severities and associated sequelae. Because these neurological disorders are diverse in their underlying causes and risk factors as well as in their associated health outcomes, modelling them together in a DisMod-MR model would not produce reliable estimates of prevalence or excess mortality. Instead, we calculated the YLDs caused by neurological disorders directly using a YLD/YLL ratio.

We calculated the ratio of YLDs to YLLs across the specified neurological disorders for which nonfatal outcomes were modelled, using YLL estimates from the GBD 2016 cause of death (CoD) analysis. We then multiplied this YLD/YLL ratio by the YLL estimates for other neurological disorders from the GBD 2016 CoD analysis, providing us with an estimate of the YLDs associated with other neurological disorders.

# Schizophrenia

## Flowchart

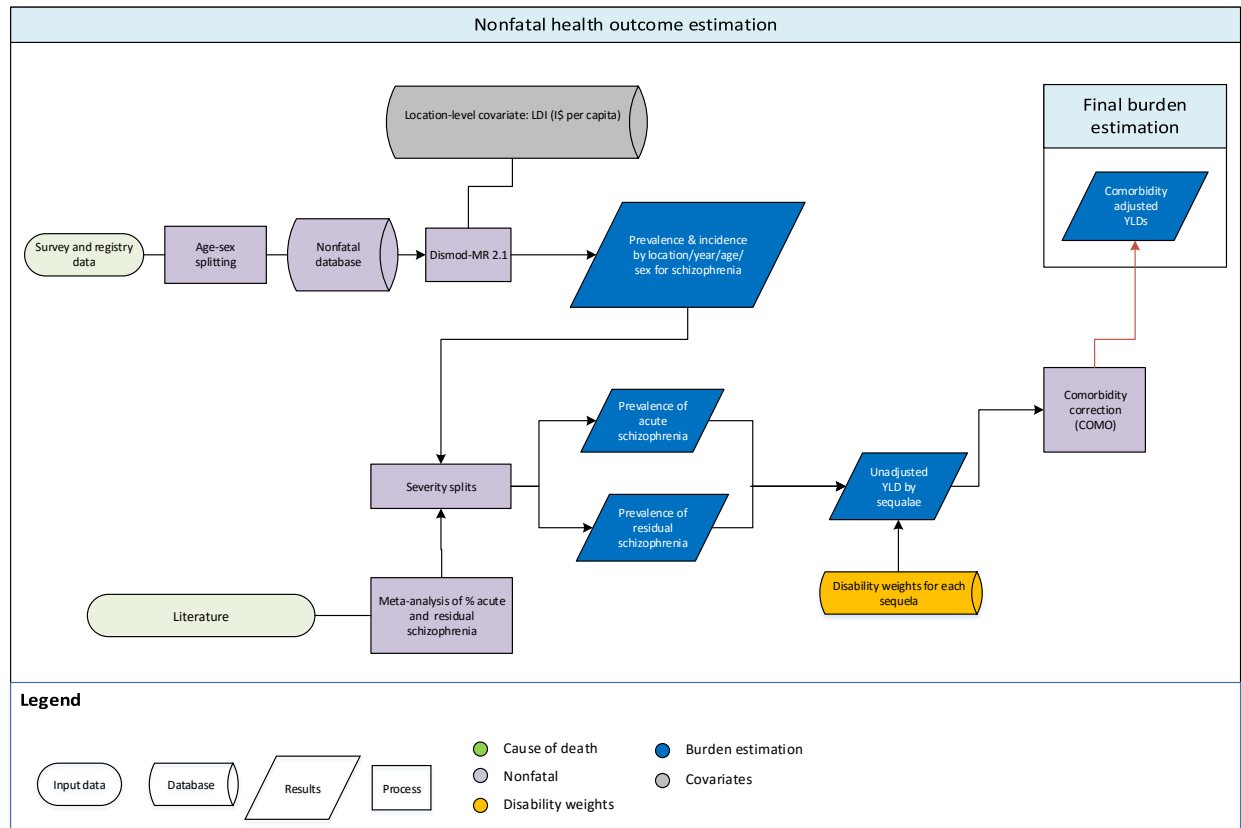

## Case Definition

Schizophrenia is a chronic psychotic disorder which involves the experience of positive symptoms (eg, delusions, hallucinations, thought disorder) and negative symptoms (eg, flat affect, loss of interest, and emotional withdrawal). Included in the GBD disease modelling were cases meeting the Diagnostic and Statistical Manual of Mental Disorders (DSM-IV-TR) or the International Classification of Diseases (ICD-10) diagnostic criteria for schizophrenia (DSM: 295.10-295.30, 295.60, 295.90; ICD: F20.9).<sup>1,2</sup> Diagnostic criteria are:

- A. Two (or more) of the following, each present for a significant portion of time during a one-month period (or less if successfully treated):
  1. Delusions
  2. Hallucinations
  3. Disorganized speech
  4. Grossly disorganized or catatonic behavior

5. Negative symptoms
  - B. Social/occupational dysfunction
  - C. Continuous signs of the disturbance persist for at least 6 months.
  - D. Exclusions must be met for schizoaffective and mood disorders, substance and general medical conditions, and a relationship to a pervasive development disorder.

## Input data

### *Model Inputs*

For GBD 2015 a systematic review of literature was conducted to capture studies of prevalence, incidence, remission, duration, and excess mortality associated with schizophrenia. In summary, the search was conducted in three stages involving searches of the peer-reviewed literature (via Medline, Embase and PubMed), the grey literature, and expert consultation. The inclusion criteria stipulated that: (1) the publication year must be from 1980 onward; (2) “caseness” must be based on clinical threshold as established by the DSM or ICD; (3) sufficient information must be provided on study method and sample characteristics to assess the quality of the study; and (4) study samples must be representative of the general population (ie, inpatient or pharmacological treatment samples, case studies, veterans or refugee samples were excluded). No limitation was set on the language of publication. In GBD 2016, a complete review of data sources logged in the Global Health Index (GHDx) was undertaken. This led to the inclusion of data from an additional 23 data sources.

The table below shows the number of studies included in GBD 2016, as well as the number of countries or subnational units and GBD world regions represented.

|                                   | Prevalence | Incidence | Duration | Excess mortality |
|-----------------------------------|------------|-----------|----------|------------------|
| Studies                           | 76         | 34        | 5        | 37               |
| Countries/subnational geographies | 53         | 24        | 17       | 34               |
| GBD world regions                 | 10         | 7         | 6        | 11               |

### *Age and sex splitting*

In GBD 2016 reported estimates of prevalence were split by age and sex where possible. Firstly, if studies reported prevalence for broad age groups by sex (eg, prevalence in 15 to 65 year old males and females separately), and also by specific age groups but for both sexes combined (eg, prevalence in 15 to 30 year olds, then in 31 to 65 year olds, for males and females combined); age-specific estimates were split by sex using the reported sex ratio and bounds of uncertainty. Secondly, where studies reported estimates across age groups spanning 20 years or more, these were split into five-year age groups using the prevalence age pattern estimated by DisMod-MR.

### Severity splits

The basis of the GBD disability weight survey assessments are lay descriptions of sequelae highlighting major functional consequences and symptoms. The lay descriptions and disability weights for schizophrenia severity levels are shown below.

| Severity level | Lay description                                                                                                                                                                                                            | DW (95% CI)            |
|----------------|----------------------------------------------------------------------------------------------------------------------------------------------------------------------------------------------------------------------------|------------------------|
| acute state    | Hears and sees things that are not real and is afraid, confused, and sometimes violent. The person has great difficulty with communication and daily activities, and sometimes wants to harm or kill himself (or herself). | 0.778<br>(0.606–0.9)   |
| residual state | Hears and sees things that are not real and has trouble communicating. The person can be forgetful, has difficulty with daily activities, and thinks about hurting himself (or herself).                                   | 0.588<br>(0.411–0.754) |

Severity splits used in GBD 2016 were consistent with those used in GBD 2013 for schizophrenia. Information on the distribution of acute and residual states of schizophrenia was obtained from a separate systematic review of the literature.<sup>4</sup> Meta-XL (a Microsoft Excel add-in for meta-analysis) was used to pool estimates across all studies to calculate the overall proportion of schizophrenia cases in each health state – acute 63% (29%–91%) and residual state 37% (9%–71%).

### Modelling strategy

The GBD 2016 epidemiological modelling strategy for schizophrenia made use of DisMod-MR 2.1 to estimate prevalence by age, sex, year, and country. Data across all epidemiological parameters were included in the modelling process. We assumed no incidence and prevalence before age 10 and after age 80. This minimum age of onset was corroborated with expert feedback and existing literature on schizophrenia. Remission was also restricted to a maximum of 0.04 as guided by data available in the dataset.

Study-level covariates can be used in DisMod-MR 2.1 to accommodate for between-study variability in the raw prevalence data. In GBD 2016 tested covariates failed to demonstrate significance resulting in a model without the inclusion of any covariates.

A location-level covariate, LDI, was also included. This covariate represents a moving average of gross domestic product (GDP) over time. LDI was also applied to excess mortality data with a negative relationship assumed. The table below illustrates the covariate, parameter, beta and exponentiated beta values for the model.



| Location-level covariate | Parameter             | beta              | Exponentiated beta |
|--------------------------|-----------------------|-------------------|--------------------|
| LDI                      | Excess mortality rate | -0.55 (-1 — -0.1) | 0.58 (0.37 — 0.90) |

## Citations

1. American Psychiatric Association. Diagnostic and Statistical Manual of Mental Disorders (DSM-IV-TR). 4th, Text Revision ed. Washington DC: American Psychiatric Association; 2000.
2. World Health Organization. The ICD-10 Classification of Mental and Behavioural Disorders. Clinical descriptions and diagnostic guidelines. Geneva: World Health Organization; 1992.
3. Ferrari AJ, Norman RE, Freedman G, et al. The burden attributable to mental and substance use disorders as risk factors for suicide: findings from the Global Burden of Disease Study 2010. *PloS one* 2014; **9**(4): e91936.
4. Ferrari AJ, Saha S, McGrath JJ, et al. Health states for schizophrenia and bipolar disorder within the Global Burden of Disease 2010 Study. *Population Health Metrics* 2012; **10**(1): 16.

# Alcohol dependence

## Flowchart

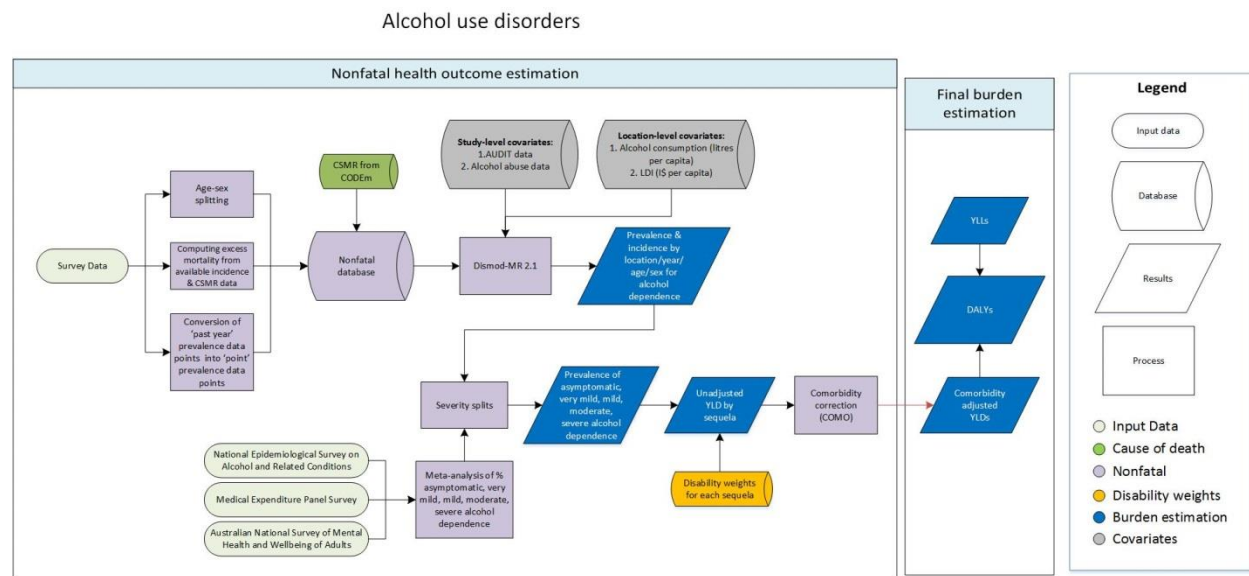

## Case definition

Alcohol dependence is a substance-related disorder involving a dysfunctional pattern of alcohol use. According to the Diagnostic and Statistical Manual of Mental Disorders (DSM-IV) criteria for alcohol dependence, at least three out of seven of the following criteria must be manifested during a 12-month period:

- Tolerance
- Withdrawal symptoms or clinically defined alcohol withdrawal syndrome
- Use in larger amounts or for longer periods than intended
- Persistent desire or unsuccessful efforts to cut down on alcohol use
- Time is spent obtaining alcohol or recovering from effects
- Social, occupational, and recreational pursuits are given up or reduced because of alcohol use
- Use is continued despite knowledge of alcohol-related harm (physical or psychological)

The DSM-IV codes for alcohol dependence is 303.90, and the corresponding International Classification of Diseases (ICD-10) codes are F10.1 and F10.2.<sup>1,2</sup>

## Input data

### *Model inputs*

In GBD 2013 and GBD 2016, systematic reviews of literature were conducted to capture studies of prevalence, incidence, remission, duration, and excess mortality associated with alcohol dependence. In summary, the search was conducted in three stages involving searches of the peer-reviewed literature (via Medline, Embase, and PubMed), the grey literature, and expert consultation.

The inclusion criteria stipulated that (1) “caseness” must be based on clinical threshold as established by the DSM and ICD; (2) sufficient information must be provided on study method and sample characteristics to assess the quality of the study; and (3) study samples must be representative of the general population (ie, inpatient or pharmacological treatment samples (accepted for estimates of mortality), case studies, veterans or refugee samples were excluded).

An adjustment was made outside of DisMod-MR 2.1 to adjust past-year prevalence estimates of alcohol dependence toward the level they would have been had the study measured point prevalence, as the latter is less susceptible to recall bias. Given that remission from alcohol dependence (and hence, average disease duration) vary considerably with age, we also applied an age pattern to this adjustment that cannot be replicated within DisMod-MR 2.1 by use of covariates. The first step was to estimate the average duration by taking the inverse of remission. Next, we applied an adjustment factor from one-year to point prevalence using the following formula where average duration is expressed in years:

$$\text{adjustment factor} = \frac{\text{average duration}}{\text{average duration} + 1}$$

Age-specific adjustment factors were applied to all one-year prevalence estimates propagating sampling uncertainty around the prevalence and remission input data through to the final adjusted prevalence estimates.

Prevalence estimates were split by age and sex where possible outside of DisMod-MR 2.1. Firstly if studies reported prevalence for broad age groups by sex (eg, prevalence in 15 to 65 year old males and females separately), and also by specific age groups but for both sexes combined (eg, prevalence in 15 to 30 year olds, then in 31 to 65 year olds, for males and females combined); age-specific estimates were split by sex using the reported sex ratio and bounds of uncertainty. Secondly, where studies reported estimates across age groups spanning 20 years or more, these were split into five-year age groups using the regional prevalence age pattern estimated by DisMod-MR 2.1.

The final dataset for GBD 2016 included 5,140 prevalence estimates, 25 incidence estimates, 14 remission estimates, and 87 excess mortality estimates. The table below shows the number of studies for each parameter as well as the number of countries/subnationals and GBD world regions covered by the available data

|                        | Prevalence | Incidence | Remission | Mortality |
|------------------------|------------|-----------|-----------|-----------|
| Studies                | 185        | 3         | 4         | 40        |
| Countries/subnationals | 202        | 3         | 4         | 25        |
| GBD world regions      | 19         | 2         | 3         | 5         |

### Severity splits & disability weights

The basis of the GBD disability weight survey assessments are lay descriptions of sequelae highlighting major functional consequences and symptoms. The lay descriptions and disability weights for alcohol dependence severity levels are shown below.

| Severity level | Lay description                                                                                                                                                                                                                        | DW (95% CI)            |
|----------------|----------------------------------------------------------------------------------------------------------------------------------------------------------------------------------------------------------------------------------------|------------------------|
| Very mild      | Drinks alcohol daily and has difficulty controlling the urge to drink. When sober, the person functions normally.                                                                                                                      | 0.123<br>(0.082–0.177) |
| Mild           | Drinks a lot of alcohol and sometimes has difficulty controlling the urge to drink. While intoxicated, the person has difficulty performing daily activities.                                                                          | 0.235<br>(0.16–0.327)  |
| Moderate       | Drinks a lot, gets drunk almost every week and has great difficulty controlling the urge to drink. Drinking and recovering cause great difficulty in daily activities, sleep loss, and fatigue.                                        | 0.373<br>(0.248–0.508) |
| Severe         | Gets drunk almost every day and is unable to control the urge to drink. Drinking and recovering replace most daily activities. The person has difficulty thinking, remembering and communicating, and feels constant pain and fatigue. | 0.57<br>(0.396–0.732)  |

*\*asymptomatic cases carried no disability weight*

Severity splits used in GBD 2016 were consistent with those used in GBD 2015. The United States' Medical Expenditure Panel Survey (MEPS, conducted in annual waves since 1996)<sup>3</sup>, the US National Epidemiological Survey on Alcohol and Related Conditions (NESARC, conducted in two waves from 2001–2002 and 2004–2005)<sup>4</sup>, and the Australian National Survey of Mental Health and Wellbeing of Adults (NSMHWB, conducted in 1997)<sup>5</sup> were used to estimate the proportion of alcohol dependence cases in the asymptomatic 40.9% (38.4%–43.3%); very mild 46.9% (43.7%–50.0%); mild 4.0% (1.8%–5.8%); moderate 3.4% (2.3%–4.5%); and severe 4.8% (3.0%–7.0%) disease categories.

### Modelling strategy

The GBD 2016 epidemiological modelling strategy for alcohol dependence made use of DisMod-MR 2.1 to estimate prevalence by age, sex, year, and location. Standardized mortality ratio and relative risk data were excluded in the modelling process. Instead we pulled in cause-specific mortality rate (CSMR) data from our CODEm and CODcorrect analyses and matched it with prevalence data points for the same geography and study year to estimate priors on excess mortality rates (by dividing CSMR by prevalence). We assumed no incidence and mortality before age 10. An upper limit of 0.6 was placed on remission (in line with data from the US National Epidemiological Survey on Alcohol and Related Conditions (NESARC) as well as a declining trend with age to restrict DisMod-MR 2.1 from straying too far from the data inputs.

Within DisMod-MR 2.1, study-level covariates were used to accommodate for other sources of between-study variability in the raw prevalence data. Combined abuse and dependence prevalence estimates were crosswalked down toward dependence-only estimates. Similarly, prevalence estimates using AUDIT were crosswalked down toward prevalence estimates from diagnostic (non-AUDIT) measures.

Country-level covariates were also included. The LDI covariate represents a moving average of gross domestic product (GDP) over time. LDI was also applied to excess mortality data with a negative relationship assumed. Alcohol consumption was also represented by a covariate representing this in terms of litres of alcohol per capita.

| Study/country covariate     | Parameter        | beta                 | Exponentiated beta |
|-----------------------------|------------------|----------------------|--------------------|
| Aabuse and dependence       | Prevalence       | 0.78 (0.66 — 0.92)   | 2.19 (1.93 — 2.50) |
| AUDIT                       | Prevalence       | 1.33 (1.24 — 1.41)   | 3.77 (3.47 — 4.08) |
| Alcohol (litres per capita) | Prevalence       | 0.50 (0 — 1.00)      | 1.65 (1.00 — 2.72) |
| LDI (I\$ per capita)        | Excess mortality | -0.11 (-0.14 — -0.1) | 0.89 (0.87 — 0.90) |

## References

1. American Psychiatric Association. Diagnostic and Statistical Manual of Mental Disorders (DSM-IV-TR). 4th, Text Revision ed. Washington DC: American Psychiatric Association; 2000.
2. World Health Organization. The ICD-10 Classification of Mental and Behavioural Disorders. Clinical descriptions and diagnostic guidelines. Geneva: World Health Organization; 1992.
3. Agency for Healthcare Research and Quality. United States Medical Expenditure Panel Survey. Rockville, United States: Agency for Healthcare Research and Quality.
4. Introduction to the National Epidemiologic Survey on Alcohol and Related Conditions [<http://pubs.niaaa.nih.gov/publications/arh29-2/74-78.htm>]. Access date 1 December 2014.
5. Australian Bureau of Statistics. National Survey of Mental Health and Wellbeing of Adults 1997. Canberra: Australian Bureau of Statistics.

# Fetal alcohol syndrome

## Flowchart

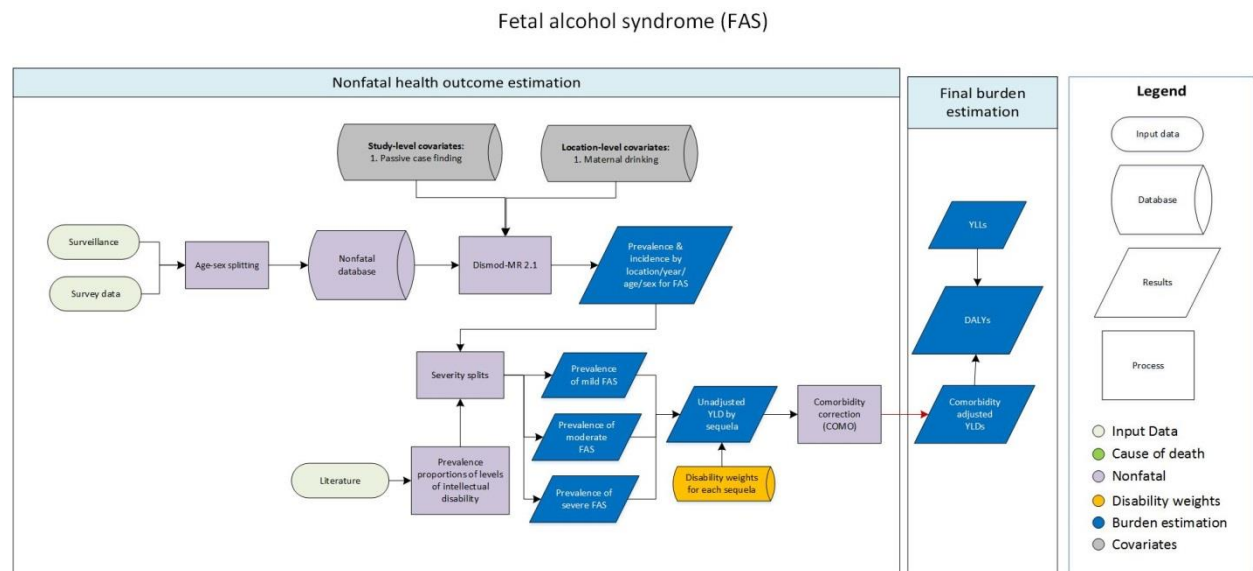

## Input data and methodological summary

### Case definition

Fetal alcohol syndrome (FAS; ICD-10: Q86.0) is a disorder caused by maternal drinking during pregnancy and is the most severe form of fetal alcohol spectrum disorder (FASD). In GBD, only FAS cases were included in the model. Other manifestations of FASD including partial fetal alcohol syndrome, alcohol-related neurodevelopmental disorder, and alcohol-related birth defects were not included. FAS is characterized by maternal alcohol exposure which results in certain patterns of facial anomalies such as short palpebral fissures and abnormalities in the premaxillary zone (eg, flat upper lip, flattened philtrum, and flat midface), growth retardation (eg, decelerating weight over time not due to nutrition), and central nervous system neurodevelopmental abnormalities (eg, decreased cranial size at birth) in the offspring.<sup>1</sup> Cases were defined according to diagnostic guidelines set by the US institute of Medicine, the British Pediatric Association, and other recognized bodies in the area.

### Input data

#### *Model inputs*

A series of systematic literature reviews were conducted to capture studies reporting the prevalence, incidence, remission, and excess mortality of FAS. The reviews incorporated searches of peer-reviewed literature via electronic databases and consultation with experts. In order for a study to be included, it must use recognized classifications of FAS (eg, the US Institute of Medicine) and provide sufficient details on study methodology and sample characteristics to determine study quality. No limitation was set on the language of publication. Data from the European Surveillance of Congenital Anomalies (EUROCAT) were

also included and updated where relevant. This methodology was utilized in GBD 2015. Updates to systematic reviews are performed on an ongoing schedule across all GBD causes, an update for FAS will be performed in the next 1-2 iterations. The final dataset for GBD 2016 included 170 prevalence estimates and 13 excess mortality estimates (from studies of individuals with intellectual disability).

|                        | Prevalence | Mortality |
|------------------------|------------|-----------|
| Studies                | 81         | 5         |
| Countries/subnationals | 53         | 4         |
| GBD world regions      | 10         | 3         |

### Severity split inputs

There were no data available which gave prevalence of FAS by severity. As such, severity splits for FAS were calculated by matching FAS severity to categories of IQ in children for which prevalence data are available. Severe FAS was matched to an IQ of less than 50, moderate FAS to an IQ of 50 to 69, mild FAS to an IQ of 74 to 84, and asymptomatic FAS to an IQ of 85 or higher. Prevalence data for these IQ levels were then used to calculate severity splits for FAS.

| Severity level | Lay description                                                                                                                                 | DW (95% CI)         |
|----------------|-------------------------------------------------------------------------------------------------------------------------------------------------|---------------------|
| Mild           | Is a little slow in developing physically and mentally, which causes some difficulty in learning but no other difficulties in daily activities. | 0.016 (0.008–0.03)  |
| Moderate       | Is slow in developing physically and mentally, which causes some difficulty in daily activities.                                                | 0.056 (0.035–0.083) |
| Severe         | Is very slow in developing physically and mentally, which causes great difficulty in daily activities.                                          | 0.179 (0.119–0.257) |

### Modelling strategy

Prevalence was set to begin from birth. Incidence was set to zero given cases cannot manifest after birth (despite the fact they may not be diagnosed immediately at birth). Remission was also set to zero. A covariate was included in the model which addressed the heterogeneity introduced by different case-finding methods, ie, active versus passive case-finding. Estimates from known high-drinking populations (eg, indigenous populations) were not considered representative of the general population and were excluded. A country-level covariate was included for GBD 2016 representing the log proportion of pregnant women who drink during their pregnancy, estimated from a meta-analysis.<sup>2</sup>

The table below illustrates the covariate, parameter, beta and exponentiated beta values for the model.

| Study/country covariate | Parameter  | beta               | Exponentiated beta |
|-------------------------|------------|--------------------|--------------------|
| Passive case finding    | Prevalence | 0.39 (0.0046–1.14) | 1.48 (1.00–3.14)   |
| Maternal drinking       | Prevalence | 0.66 (0.014–1.45)  | 1.93 (1.01–4.25)   |

## References

1. Stratton K, Howe C, Battaglia F, editors. Fetal alcohol syndrome. Diagnosis, epidemiology, prevention, and treatment. Washington DC: National Academy Press; 1996.
2. Popova S, Lange S, Probst C, Gmel G, Rehm J. Estimation of national, regional, and global prevalence of alcohol use during pregnancy and fetal alcohol syndrome: a systematic review and meta-analysis. *The Lancet Global Health* 2017.



# Opioid dependence

## Flowchart

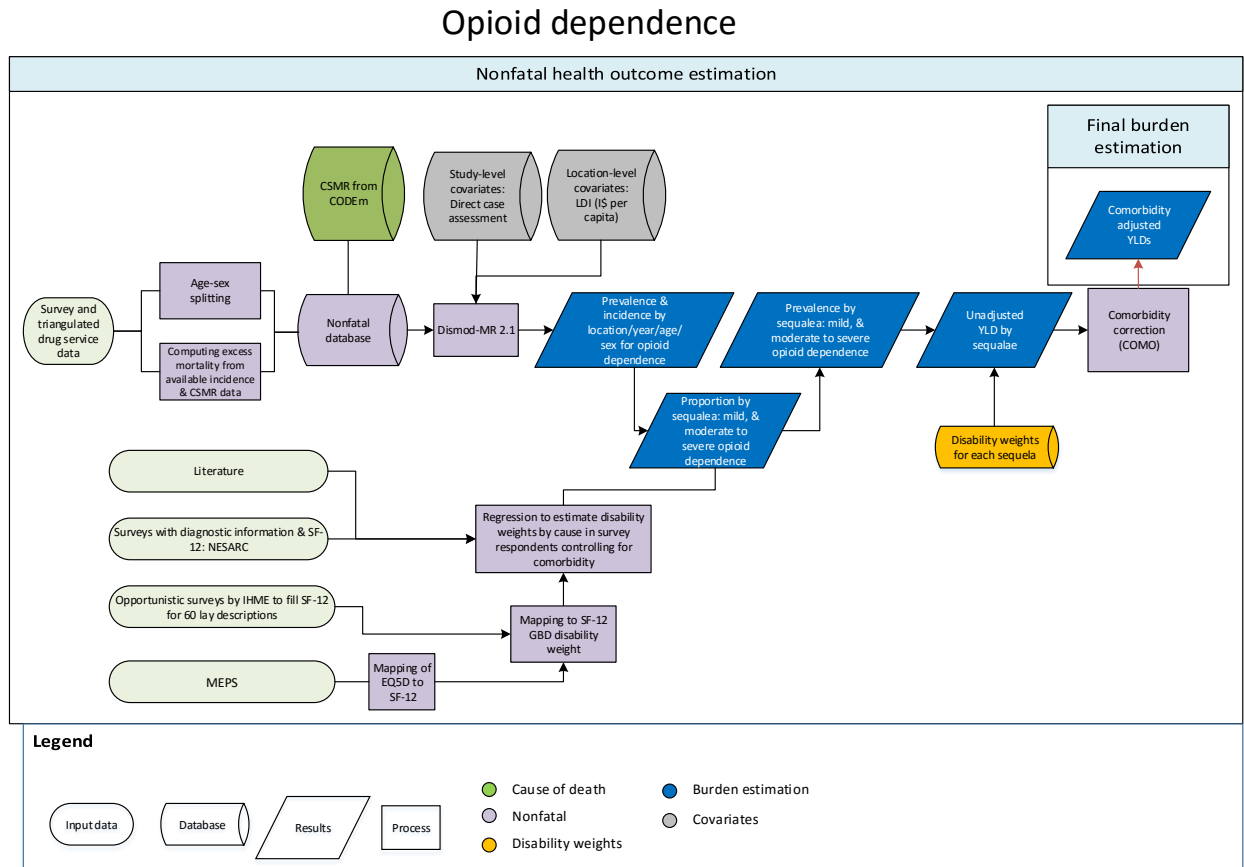

## Case Definition

Opioid dependence is a substance-related disorder involving a dysfunctional pattern of opioid use. Included in the GBD disease modelling were cases meeting the Diagnostic and Statistical Manual of Mental Disorders (DSM-IV-TR) or the International Classification of Diseases (ICD-10) diagnostic criteria for opioid dependence (DSM: 304.00; ICD: F11.2), excluding those cases due to a general medical condition.<sup>1,2</sup> According to DSM-IV TR criteria, dependence involves a maladaptive pattern of substance use leading to clinically significant impairment or distress. At least three of the following symptoms must be experienced within the same 12-month period:

- Tolerance, characterized by either
  - a need for increased amounts of the substance to achieve intoxication; or
  - markedly diminished effect with continued use of the same amount of the substance;
- Withdrawal, characterized by either
  - Withdrawal symptoms characteristic to dependence; or
  - the same (or similar) substance is taken to avoid withdrawal symptoms;

- Substance taken in progressively larger amounts or for longer period;
- Persistent desire or unsuccessful efforts to reduce substance use;
- Disproportionate time dedicated to obtaining the substance;
- Other important activities are given up because of the substance use; and
- Substance use is continued despite knowledge of physical or psychological problems occurring as a result of the substance.

## Input data

### *Model inputs*

A systematic review of the literature was conducted to capture studies of prevalence, incidence, remission, and excess mortality associated with opioid dependence. In summary, the search was conducted in three stages involving searches of the peer-reviewed literature (via Medline, Embase, and Pubmed), the grey literature and, expert consultation. The agreed-upon approach for mental and substance use disorders was to conduct electronic database searches on a rolling basis. All three stages of GBD 2010’s literature review were repeated for GBD 2013 to capture additional data published up to 2013. For GBD 2015, stages 2 and 3 of the literature review were updated, and in GBD 2016, the peer-reviewed database search (stage 1) was conducted via Medline, Embase, and Psycinfo to capture studies published from 2013 to 2016.

The inclusion criteria stipulated that 1) the publication year must be from 1980 onward; 2) “caseness” must be based on clinical threshold as established by the DSM or ICD; 3) sufficient information must be provided on study method and sample characteristics to assess the quality of the study; and (4) study samples must be representative of the general population (ie, inpatient or pharmacological treatment samples, case studies, veterans or refugee samples were excluded). No limitation was set on the language of publication. Methods used for this systematic review have been reported in greater detail elsewhere.<sup>3,4</sup> The table below shows the number of studies included, as well as the number of countries or subnational units and GBD world regions represented.

|                                   | Prevalence | Remission | Mortality rate |
|-----------------------------------|------------|-----------|----------------|
| Studies                           | 66         | 8         | 41             |
| Countries/subnational geographies | 189        | 25        | 23             |
| GBD world regions                 | 10         | 5         | 6              |

### Age and sex splitting

In GBD 2016, reported estimates of prevalence were split by age and sex where possible. First, if studies reported prevalence for broad age groups by sex (eg, prevalence in 15 to 65 year old males and females separately), and also by specific age groups but for both sexes combined (eg, prevalence in 15 to 30 year olds, then in 31 to 65 year olds, for males and females combined); age-specific estimates were split by sex using the reported sex ratio and bounds of uncertainty. Second, where studies reported estimates across age groups spanning 20 years or more, these were split into five-year age groups using the prevalence age pattern estimated by DisMod MR.

### Severity splits

The basis of the GBD disability weight survey assessments are lay descriptions of sequelae highlighting major functional consequences and symptoms. The lay descriptions and disability weights for opioid dependence severity levels are shown below.

| Severity level     | Lay description                                                                                                                                                                                                | DW (95% CI)         |
|--------------------|----------------------------------------------------------------------------------------------------------------------------------------------------------------------------------------------------------------|---------------------|
| Mild               | Uses heroin (or methadone) daily and has difficulty controlling the habit. When not using, the person functions normally.                                                                                      | 0.335 (0.221–0.473) |
| Moderate to severe | Uses heroin daily and has difficulty controlling the habit. When the effects wear off, the person feels severe nausea, agitation, vomiting, and fever. The person has a lot of difficulty in daily activities. | 0.697 (0.510–0.843) |

The proportion of people with opioid dependence within each of the severity levels was determined based on available data from US National Epidemiological Survey on Alcohol and Related Conditions (NESARC), conducted in two waves from 2001–2002 and 2004–2005,<sup>5</sup> and the Comorbidity and Trauma study conducted in 2005–2008.<sup>6,7</sup> The estimated distribution of opioid dependent cases by severity were asymptomatic (16%, 13%–19%), mild (37%, 20%–55%), and moderate/severe (47%, 29%–64%).

### Modelling Strategy

We ran a DisMod-MR model to produce estimates by age, sex, year, and country. We assumed no incidence and excess mortality before age 15. This minimum age of onset was corroborated with expert feedback and existing literature on opioid dependence. We also assumed no incidence after age 64 as supported by data from various sources including the European Monitoring Centre for Drugs and Drug Addiction.<sup>8</sup> An upper limit of 0.2 was placed on remission consistent with limits in the dataset. Cause-specific mortality rates (CSMR) from the GBD 2016 cause of death model for opioid use disorders were included as data points in the DisMod-MR model.

The prevalence dataset included data points using “direct” or “indirect” survey methods. “Direct” methods of measuring opioid dependence predominantly involve surveys of the general population that ask if respondents use or are dependent on opioid. Surveys tend to underestimate the prevalence of the most harmful and stigmatized forms of illicit drug use in ways that probably vary between countries and cultures.<sup>9</sup> “Indirect” methods are considered superior; they use different sources of data to indirectly estimate the total number of drug users (methods include “multiplier methods,” back-projection and capture-recapture methods). Due to insufficient data on dependence from indirect survey methods (considered to be the gold standard for GBD purposes), estimates derived from direct survey methods were included in the modelling. The *cv\_direct* covariate was then used to adjust for whether a direct or indirect survey method was used. A crosswalk was estimated to convert all dependence estimates obtained via direct methods in the dataset, into its equivalent value if the study had measured dependence estimates obtained via indirect methods. A direct:indirect dependence ratio of 0.39 (0.22–0.78) was calculated by DisMod-MR based on comparable direct and indirect dependence estimates in the dataset.

Betas and exponentiated values (which can be interpreted as an odds ratio) for each study-level covariate are shown in the table below:

| Study covariate | Parameter  | beta                  | Exponentiated beta |
|-----------------|------------|-----------------------|--------------------|
| cv_direct       | Prevalence | -0.95 (-0.95 – -0.95) | 0.39 (0.39–0.39)   |

## Citations

1. American Psychiatric Association. Diagnostic and Statistical Manual of Mental Disorders (DSM-IV-TR). 4th, Text Revision ed Washington DC: American Psychiatric Association; 2000.
2. World Health Organization. The ICD-10 Classification of Mental and Behavioural Disorders. Clinical descriptions and diagnostic guidelines Geneva: World Health Organization; 1992.
3. Degenhardt L, Bucello C, Calabria B, Nelson P, Roberts A, Hall W, et al. What data are available on the extent of illicit drug use and dependence globally? Results of four systematic reviews. Drug and alcohol dependence. 2011.
4. Calabria B, Degenhardt L, Briegleb C, Vos T, Hall W, Lynskey M, et al. Systematic review of prospective studies investigating “remission” from amphetamine, cannabis, cocaine or opioid dependence. Addictive Behaviors. 2010.
5. Grant BF, Dawson DA. National Institute on Alcohol Abuse and Alcoholism. Alcohol Health & Research World. 2006; 29(2): p. 74.
6. Shand FL, Slade T, Degenhardt L, Baillie A, Nelson EC. Opioid dependence latent structure: two classes with differing severity? Addiction. 2011; 106(3): p. 590-8.
7. Shand FL, Degenhardt L, Slade T, Nelson EC. Sex differences amongst dependent heroin users: Histories, clinical characteristics and predictors of other substance dependence. Addictive behaviors. 2011; 36(1): p. 27-36.
8. European Monitoring Centre for Drugs and Drug Addiction. Lisbon, Portugal; 2014.
9. Reuter P, Trautmann F. A Report on Global Illicit Drugs Markets 1998-2007. Utrecht; 2009.

# Cocaine dependence

## Flowchart

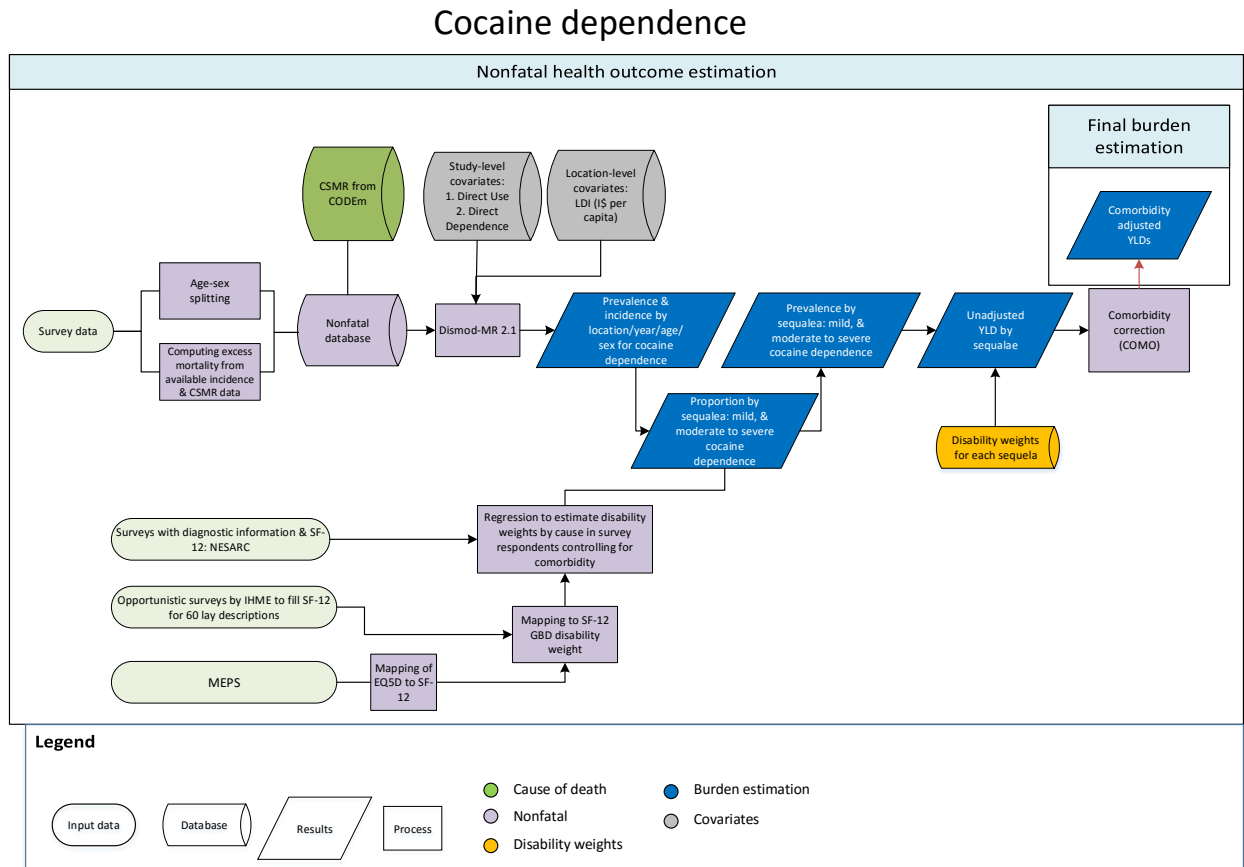

## Case Definition

Cocaine dependence is a substance-related disorder involving a dysfunctional pattern of cocaine use. Included in the GBD disease modelling were cases meeting the Diagnostic and Statistical Manual of Mental Disorders (DSM-IV-TR) or the International Classification of Diseases (ICD-10) diagnostic criteria for cocaine dependence (DSM: 304.20; ICD: F14.2), excluding those cases due to a general medical condition.<sup>1,2</sup> According to DSM-IV TR criteria, dependence involves a maladaptive pattern of substance use leading to clinically significant impairment or distress. At least three of the following symptoms must be experienced within the same 12-month period:

- Tolerance, characterized by either
  - a need for increased amounts of the substance to achieve intoxication; or
  - markedly diminished effect with continued use of the same amount of the substance;
- Withdrawal, characterized by either
  - Withdrawal symptoms characteristic to dependence; or
  - the same (or similar) substance is taken to avoid withdrawal symptoms;

- Substance taken in progressively larger amounts or for longer period;
- Persistent desire or unsuccessful efforts to reduce substance use;
- Disproportionate time dedicated to obtaining the substance;
- Other important activities are given up because of the substance use; and
- Substance use is continued despite knowledge of physical or psychological problems occurring as a result of the substance.

## Input data

### *Model inputs*

A systematic review of the literature was conducted to capture studies of prevalence, incidence, remission, and excess mortality associated with cocaine dependence. In summary, the search was conducted in three stages involving searches of the peer-reviewed literature (via Medline, Embase, and Pubmed), the grey literature and, expert consultation. The agreed-upon approach for mental and substance use disorders was to conduct electronic database searches on a rolling basis. All three stages of GBD 2010’s literature review were repeated for GBD 2013 to capture additional data published up to 2013. For GBD 2015, stages 2 and 3 of the literature review were updated and in GBD 2016, the peer-reviewed database search (stage 1) was conducted via Medline, Embase, and Psycinfo to capture studies published from 2013 to 2016.

The inclusion criteria stipulated that 1) the publication year must be from 1980 onward; 2) “caseness” must be based on clinical threshold as established by the DSM or ICD; 3) sufficient information must be provided on study method and sample characteristics to assess the quality of the study; and (4) study samples must be representative of the general population (ie, inpatient or pharmacological treatment samples, case studies, veterans or refugee samples were excluded). No limitation was set on the language of publication. Methods used for this systematic review have been reported in greater detail elsewhere.<sup>3,4</sup> The table below shows the number of studies included, as well as the number of countries or subnational units and GBD world regions represented.

|                                   | Prevalence | Remission | Standardized mortality ratio, with-condition mortality rate |
|-----------------------------------|------------|-----------|-------------------------------------------------------------|
| Studies                           | 118        | 3         | 7                                                           |
| Countries/subnational geographies | 274        | 3         | 7                                                           |
| GBD world regions                 | 13         | 2         | 3                                                           |

### Age and sex splitting

In GBD 2016, reported estimates of prevalence were split by age and sex where possible. First, if studies reported prevalence for broad age groups by sex (eg, prevalence in 15 to 65 year old males and females separately), and also by specific age groups but for both sexes combined (eg, prevalence in 15 to 30 year olds, then in 31 to 65 year olds, for males and females combined); age-specific estimates were split by sex using the reported sex ratio and bounds of uncertainty. Second, where studies reported estimates across

age groups spanning 20 years or more, these were split into five-year age groups using the prevalence age pattern estimated by DisMod-MR.

### *Severity splits*

The basis of the GBD disability weight survey assessments are lay descriptions of sequelae highlighting major functional consequences and symptoms. The lay descriptions and disability weights for cocaine dependence severity levels are shown below.

| Severity level     | Lay description                                                                                                                                                                                 | DW (95% CI)         |
|--------------------|-------------------------------------------------------------------------------------------------------------------------------------------------------------------------------------------------|---------------------|
| Mild               | Uses cocaine at least once a week and has some difficulty controlling the habit. When not using, the person functions normally.                                                                 | 0.116 (0.074–0.165) |
| Moderate to severe | Uses cocaine and has difficulty controlling the habit. The person sometimes has mood swings, anxiety, paranoia, hallucinations and sleep problems, and has some difficulty in daily activities. | 0.479 (0.324–0.634) |

The proportion of people with cocaine dependence within each of the severity levels were determined based on available data from US National Epidemiological Survey on Alcohol and Related Conditions (NESARC), conducted in two waves from 2001-2002 and 2004-2005<sup>5</sup>. The estimated distribution of cocaine dependent cases by severity were asymptomatic (50%, 37%–64%), mild (25%, 18%–33%), and moderate/severe (25%, 17%–33%).

## **Modelling Strategy**

We ran a DisMod-MR model to produce estimates by age, sex, year, and country. We assumed no incidence, remission, and excess mortality before age 15, and an upper limit of 0.2 on remission. The minimum age of onset was corroborated with expert feedback and existing literature from various sources including the European Monitoring Centre for Drugs and Drug Addiction.<sup>6</sup> Cause-specific mortality rates (CSMR) from the GBD 2016 cause of death model for cocaine use disorders was included as data points in the DisMod-MR model.

The prevalence dataset included data points of both use and dependence estimated using “direct” or “indirect” survey methods. “Direct” methods of measuring amphetamine dependence predominantly involve surveys of the general population that ask if respondents use or are dependent on amphetamine. Surveys tend to underestimate the prevalence of the most harmful and stigmatized forms of illicit drug use in ways that probably vary between countries and cultures.<sup>7</sup> “Indirect” methods are considered superior; they use different sources of data to indirectly estimate the total number of drug users (methods include “multiplier methods,” back-projection and capture-recapture methods). Due to the lack of data available on cocaine dependence from indirect survey methods (considered to be the gold standard for GBD purposes), estimates of use and/or estimates from direct survey methods were included in the modelling. Study-level covariates were then used to accommodate for between-study variability in the raw prevalence data. The *cv\_direct* use covariate was used to adjust for whether direct or indirect survey methods were used. This converted all use estimates obtained via direct methods in the dataset, into its equivalent value if the study had measured dependence estimates obtained via indirect methods. A ratio of direct use:indirect dependence was calculated by comparing similar direct

use and indirect dependence estimates in the dataset. To allow for meaningful comparisons, paired direct use and indirect dependence estimates needed to be similar in terms of the country they were from, year, age group, sex, and prevalence type. To maximize the number of data points available for this ratio paired estimates for psychostimulants (ie, both cocaine and amphetamine) were used. Once a dataset was set up with paired direct use and indirect dependence estimates, MetaXL (a meta-analysis add-in for Microsoft Excel) was utilized to estimate a ratio of direct use:indirect dependence, whereby direct use estimates were found to be 3.6 (2.6–5.2) times higher than indirect dependence estimates. This ratio was used in DisMod-MR to adjust all use estimates in the dataset downward, toward the level they would have been had the study reported indirect dependence. A similar method was used to adjust prevalence estimates of cocaine dependence obtained via direct methods toward the level they would have been had the study measured cocaine dependence using indirect methods. The estimated ratio of direct dependence: indirect dependence was 0.5 (0.2–1.1).

Betas and exponentiated values (which can be interpreted as an odds ratio) for each study-level covariate are shown in the table below:

| Study covariate      | Parameter  | beta                  | Exponentiated beta |
|----------------------|------------|-----------------------|--------------------|
| cv_direct use        | Prevalence | 1.29 (1.29–1.29)      | 3.63 (3.63–3.63)   |
| cv_direct dependence | Prevalence | -0.68 (-0.68 – -0.68) | 0.51 (0.51–0.51)   |

## Citations

1. American Psychiatric Association. Diagnostic and Statistical Manual of Mental Disorders (DSM-IV-TR). 4th, Text Revision ed Washington DC: American Psychiatric Association. 2000.
2. World Health Organization. The ICD-10 Classification of Mental and Behavioural Disorders. Clinical descriptions and diagnostic guidelines Geneva: World Health Organization. 1992.
3. Degenhardt L, Bucello C, Calabria B, Nelson P, Roberts A, Hall W, et al. What data are available on the extent of illicit drug use and dependence globally? Results of four systematic reviews. Drug and alcohol dependence. 2011.
4. Calabria B, Degenhardt L, Briegleb C, Vos T, Hall W, Lynskey M, et al. Systematic review of prospective studies investigating “remission” from amphetamine, cannabis, cocaine or opioid dependence. Addictive Behaviors. 2010.
5. Grant BF, Dawson DA. National Institute on Alcohol Abuse and Alcoholism. Alcohol Health & Research World. 2006; 29(2): p. 74.
6. European Monitoring Centre for Drugs and Drug Addiction. Lisbon, Portugal 2014.
7. Reuter P, Trautmann F. A Report on Global Illicit Drugs Markets 1998-2007. Utrecht. 2009.



# Amphetamine dependence

## Flowchart

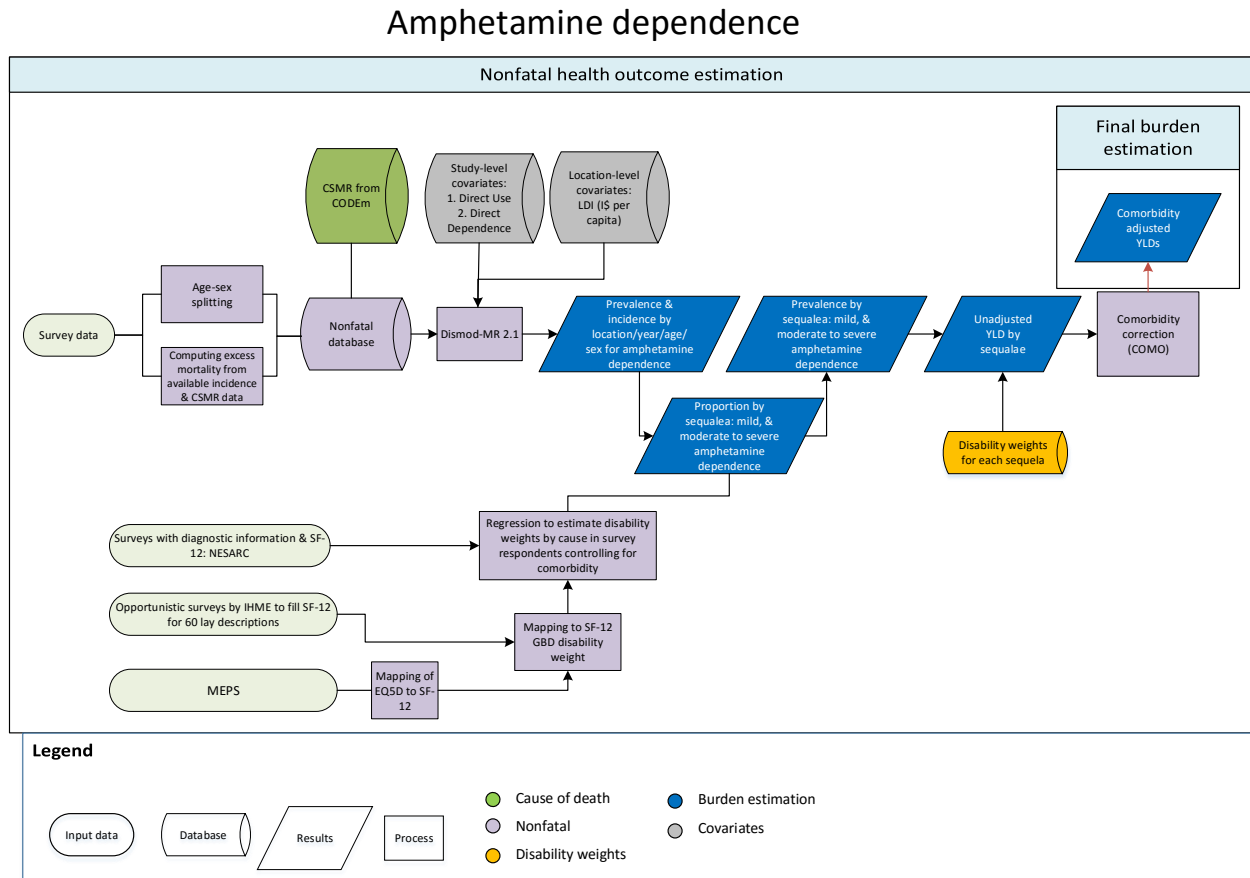

## Case definition

Amphetamine dependence is a substance-related disorder involving a dysfunctional pattern of amphetamine use. Included in the GBD disease modelling were cases meeting the Diagnostic and Statistical Manual of Mental Disorders (DSM-IV-TR) or the International Classification of Diseases (ICD-10) diagnostic criteria for amphetamine dependence (DSM: 304.40; ICD: F15.2), excluding those cases due to a general medical condition.<sup>1,2</sup> According to DSM-IV TR criteria, dependence involves a maladaptive pattern of substance use, leading to clinically significant impairment or distress. At least three of the following symptoms must be experienced within the same 12-month period:

- Tolerance, characterized by either
  - a need for increased amounts of the substance to achieve intoxication; or
  - markedly diminished effect with continued use of the same amount of the substance;
- Withdrawal, characterized by either

- Withdrawal symptoms characteristic to dependence; or
- the same (or similar) substance is taken to avoid withdrawal symptoms;
- Substance taken in progressively larger amounts or for longer period;
- Persistent desire or unsuccessful efforts to reduce substance use;
- Disproportionate time dedicated to obtaining the substance;
- Other important activities are given up because of the substance use; and
- Substance use is continued despite knowledge of physical or psychological problems occurring as a result of the substance.

## Input data

### *Model inputs*

A systematic review of the literature was conducted to capture studies of prevalence, incidence, remission, and excess mortality associated with amphetamine dependence. In summary, the search was conducted in three stages involving searches of the peer-reviewed literature (via Medline, Embase and Pubmed), the grey literature and, expert consultation. The agreed-upon approach for mental and substance use disorders was to conduct electronic database searches on a rolling basis. All three stages of GBD 2010's literature review were repeated for GBD 2013 to capture additional data published up to 2013. For GBD 2015, stages 2 and 3 of the literature review were updated and in GBD 2016, the peer-reviewed database search (stage 1) was conducted via Medline, Embase and Psycinfo to capture studies published from 2013 to 2016.

The inclusion criteria stipulated that: 1) the publication year must be from 1980 onward; 2) "caseness" must be based on clinical threshold as established by the DSM or ICD; 3) sufficient information must be provided on study method and sample characteristics to assess the quality of the study; and (4) study samples must be representative of the general population (ie, inpatient or pharmacological treatment samples, case studies, veterans, or refugee samples were excluded). No limitation was set on the language of publication. Methods used for this systematic review have been reported in greater detail elsewhere.<sup>3,4</sup> The table below shows the number of studies included, as well as the number of countries or subnational units and GBD world regions represented.

|                                   | <b>Prevalence</b> | <b>Remission</b> | <b>Mortality rate</b> |
|-----------------------------------|-------------------|------------------|-----------------------|
| Studies                           | 88                | 2                | 6                     |
| Countries/subnational geographies | 274               | 3                | 7                     |
| GBD world regions                 | 13                | 2                | 3                     |

### Age and sex splitting

In GBD 2016, reported estimates of prevalence were split by age and sex where possible. First, if studies reported prevalence for broad age groups by sex (eg, prevalence in 15 to 65 year old males and females separately), and also by specific age groups but for both sexes combined (eg, prevalence in 15 to 30 year olds, then in 31 to 65 year olds, for males and females combined); age-specific estimates were split by sex using the reported sex ratio and bounds of uncertainty. Second, where studies reported estimates across age groups spanning 20 years or more, these were split into five-year age groups using the prevalence age pattern estimated by DisMod MR.

### Severity splits

The basis of the GBD disability weight survey assessments are lay descriptions of sequelae highlighting major functional consequences and symptoms. The lay descriptions and disability weights for amphetamine dependence severity levels are shown below.

| Severity level     | Lay description                                                                                                                                                                 | DW (95% CI)         |
|--------------------|---------------------------------------------------------------------------------------------------------------------------------------------------------------------------------|---------------------|
| Mild               | Uses stimulants (drugs) at least once a week and has some difficulty controlling the habit. When not using, the person functions normally.                                      | 0.079 (0.051–0.114) |
| Moderate to severe | Uses stimulants (drugs) and has difficulty controlling the habit. The person sometimes has depression, hallucinations, and mood swings, and has difficulty in daily activities. | 0.486 (0.329–0.637) |

The proportion of people with amphetamine dependence within each of the severity levels was determined based on available data from US National Epidemiological Survey on Alcohol and Related Conditions (NESARC), conducted in two waves from 2001–2002 and 2004–2005.<sup>5</sup> The estimated distribution of amphetamine dependent cases by severity were asymptomatic (55%, 40%–71%), mild (19%, 12%–27%), and moderate/severe (26%, 16%–35%).

### Modelling Strategy

We ran a DisMod-MR model to produce estimates by age, sex, year, and country. We assumed no incidence, remission, and excess mortality before age 15, and an upper limit of 0.35 on remission. The minimum age of onset was corroborated with expert feedback and existing literature from various sources including the European Monitoring Centre for Drugs and Drug Addiction.<sup>6</sup> Cause-specific mortality rates (CSMR) from the GBD 2016 cause of death model for amphetamine use disorders was included as data-points in the DisMod-MR model.

The prevalence dataset included data-points of both use and dependence estimated using “direct” or “indirect” survey methods. “Direct” methods of measuring amphetamine dependence predominantly involve surveys of the general population that ask if respondents use or are dependent on amphetamine. Surveys tend to underestimate the prevalence of the most harmful and stigmatized forms of illicit drug use in ways that probably vary between countries and cultures.<sup>7</sup> “Indirect” methods are considered superior; they use different sources of data to indirectly estimate the total number of drug users (methods include “multiplier methods,” back-projection and capture-recapture methods). Due to the lack of data available on amphetamine dependence from indirect survey methods (considered to be the gold standard for GBD purposes), estimates of use and/or estimates from direct survey methods were included in the modelling. Study-level covariates were then used to accommodate for between-study variability in the raw prevalence data. The *cv\_direct* use covariate was used to adjust for whether direct or indirect survey methods were used. This converted all use estimates obtained via direct methods in the dataset, into its equivalent value if the study had measured dependence estimates obtained via indirect methods. A ratio of direct use:indirect dependence was calculated by comparing similar direct use and indirect dependence estimates in the dataset. To allow for meaningful comparisons, paired direct use and indirect dependence estimates needed to be similar in terms of the country they were from,

year, age group, sex and, prevalence type. To maximize the number of data points available for this ratio paired estimates for psychostimulants (ie, both cocaine and amphetamine) were used. Once a dataset was set up with paired direct use and indirect dependence estimates, MetaXL (a meta-analysis add-in for Microsoft Excel) was utilized to estimate a ratio of direct use:indirect dependence, whereby direct use estimates were found to be 3.6 (2.6–5.2) times higher than indirect dependence estimates. This ratio was used in DisMod-MR to adjust all use estimates in the dataset downward, toward the level they would have been had the study reported indirect dependence. A similar method was used to adjust prevalence estimates of amphetamine dependence obtained via direct methods towards the level they would have been had the study measured amphetamine dependence using indirect methods. The estimated ratio of direct dependence: indirect dependence was 0.5 (0.2–1.1).

Betas and exponentiated values (which can be interpreted as an odds ratio) for each study level covariate are shown in the table below:

| Study covariate      | Parameter  | beta                  | Exponentiated beta |
|----------------------|------------|-----------------------|--------------------|
| cv_direct use        | Prevalence | 1.29 (1.29–1.29)      | 3.63 (3.63–3.63)   |
| cv_direct dependence | Prevalence | -0.68 (-0.68 – -0.68) | 0.51 (0.51–0.51)   |

## Citations

1. American Psychiatric Association. Diagnostic and Statistical Manual of Mental Disorders (DSM-IV-TR). 4th, Text Revision ed Washington DC: American Psychiatric Association. 2000.
2. World Health Organization. The ICD-10 Classification of Mental and Behavioural Disorders. Clinical descriptions and diagnostic guidelines Geneva: World Health Organization. 1992.
3. Degenhardt L, Bucello C, Calabria B, Nelson P, Roberts A, Hall W, et al. What data are available on the extent of illicit drug use and dependence globally? Results of four systematic reviews. Drug and alcohol dependence. 2011.
4. Calabria B, Degenhardt L, Briegleb C, Vos T, Hall W, Lynskey M, et al. Systematic review of prospective studies investigating “remission” from amphetamine, cannabis, cocaine or opioid dependence. Addictive Behaviors. 2010.
5. Grant BF, Dawson DA. National Institute on Alcohol Abuse and Alcoholism. Alcohol Health & Research World. 2006; 29(2): p. 74.
6. European Monitoring Centre for Drugs and Drug Addiction. Lisbon, Portugal 2014.
7. Reuter P, Trautmann F. A Report on Global Illicit Drugs Markets 1998-2007. Utrecht. 2009.

# Cannabis Dependence

## Flowchart

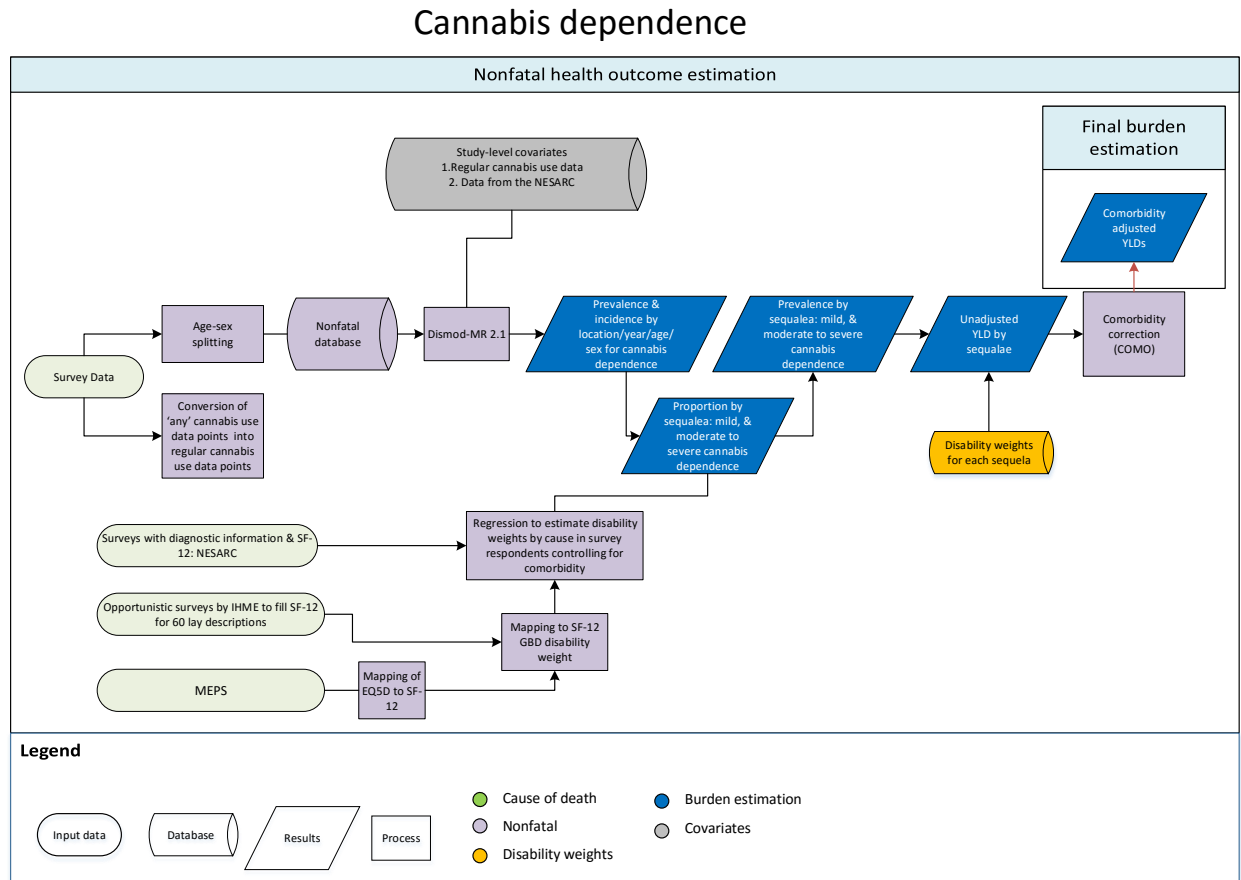

## Case Definition

Cannabis dependence is a substance-related disorder involving a dysfunctional pattern of cannabis use. Included in GBD disease modelling were cases meeting diagnostic criteria for cannabis dependence according to the Diagnostic and Statistical Manual of Mental Disorders (DSM), or the equivalent diagnosis in the International Classification of Diseases (ICD). These were identified by the following codes: DSM:304.30, ICD:F12.2; excluding those cases due to a general medical condition.<sup>1,2</sup>

According to DSM-IV-TR criteria, cannabis dependence involves a maladaptive pattern of cannabis use, leading to clinically significant impairment or distress. At least three of the following symptoms must be experienced within the same 12-month period:

- Tolerance, characterized by either
  - a need for increased amounts of the substance to achieve intoxication; or
  - markedly diminished effect with continued use of the same amount of the substance;

- Withdrawal, characterized by either
  - Withdrawal symptoms characteristic to cannabis dependence; or
  - the same (or similar) substance is taken to avoid withdrawal symptoms;
- substance taken in progressively larger amounts or for longer period;
- persistent desire or unsuccessful efforts to reduce substance use;
- disproportionate time dedicated to obtaining the substance;
- other important activities are given up because of the substance use; and
- substance use is continued despite knowledge of physical or psychological problems occurring as a result of the substance.

## Input data

### *Model inputs*

For GBD 2010, a systematic review of the literature was conducted to capture studies of prevalence, incidence, remission, and excess mortality associated with cannabis dependence. In summary, the search was conducted in three stages involving electronic searches of the peer-reviewed literature (via Medline, Embase, and PubMed), the grey literature and, expert consultation. The agreed-upon approach for mental and substance use disorders was to conduct electronic database searches on a rolling basis. All three stages of GBD 2010's literature review were repeated for GBD 2013 to capture additional data published up to 2013. For GBD 2015, stages 2 and 3 of the literature review were updated and in GBD 2016, the peer-reviewed database search (stage 1) was conducted via Medline, Embase, and Psycinfo to capture studies published from 2013 to 2016.

The inclusion criteria stipulated that: (1) the publication year must be from 1980 onward; (2) "caseness" must be based on clinical threshold as established by the DSM or ICD; (3) sufficient information must be provided on study method and sample characteristics to assess the quality of the study; and (4) study samples must be representative of the general population (ie, inpatient or pharmacological treatment samples, case studies, veterans or refugee samples were excluded). No limitation was set on the language of publication. Methods used for this systematic review have been reported in greater detail elsewhere.<sup>3-6</sup> The table below shows the number of studies included, as well as the number of countries or subnational units and GBD world regions represented.

|                                   | <b>Prevalence</b> | <b>Remission</b> | <b>Mortality</b> |
|-----------------------------------|-------------------|------------------|------------------|
| Studies                           | 251               | 3                | -                |
| Countries/subnational geographies | 359               | 3                | -                |
| GBD world regions                 | 19                | 3                | -                |

### Age and sex splitting

In GBD 2016, reported estimates of prevalence were split by age and sex where possible. First, if studies reported prevalence for broad age groups by sex (eg, prevalence in 15 to 65 year old males and females separately), and also by specific age groups but for both sexes combined (eg, prevalence in 15 to 30 year olds, then in 31 to 65 year olds, for males and females combined); age-specific estimates were split by sex using the reported sex ratio and bounds of uncertainty. Second, where studies reported estimates across

age groups spanning 20 years or more, these were split into five-year age groups using the prevalence age pattern estimated by DisMod MR.

### *Severity splits*

The basis of the GBD disability weight survey assessments are lay descriptions of sequelae highlighting major functional consequences and symptoms. The lay descriptions and disability weights for cannabis dependence severity levels are shown below.

| Severity level     | Lay description                                                                                                                                                                | DW (95% CI)         |
|--------------------|--------------------------------------------------------------------------------------------------------------------------------------------------------------------------------|---------------------|
| Mild               | Uses marijuana at least once a week and has some difficulty controlling the habit. When not using, the person functions normally.                                              | 0.039 (0.024–0.06)  |
| Moderate to severe | Uses marijuana daily and has difficulty controlling the habit. The person sometimes has mood swings, anxiety, and hallucinations, and has some difficulty in daily activities. | 0.266 (0.178–0.364) |

The US National Epidemiological Survey on Alcohol and Related Conditions (NESARC, conducted in two waves from 2001-2002 and 2004-2005)<sup>7</sup> was used to estimate the proportion of cannabis dependence cases asymptomatic (58%, 51%–63%), mild (36%, 31%–42%) and moderate to severe (6%, 4%–8%).

## **Modelling Strategy**

The epidemiological modelling strategy for cannabis dependence made use of DisMod-MR. Due to insufficient data, estimates of any cannabis use and regular (ie, weekly) cannabis use were included in the disease modelling of cannabis dependence in a two-step process. At step 1, a crosswalk was estimated to convert estimates of any use in the dataset into its equivalent value if the study had measured regular use. To do this a ratio of use:regular use was calculated by comparing similar regular use and use estimates in the dataset. To allow for meaningful comparisons, paired regular use and use estimates needed to be similar in terms of the country they were from, year, age group, sex, and prevalence type. Once a dataset was set up with paired regular use and use estimates, MetaXL (a meta-analysis add-in for Microsoft Excel) was used to estimate a ratio of use: regular use whereby use estimates were found to be 2.9 (2.5–3.3) times higher than regular use estimates. This ratio was used to adjust all use estimates in the dataset downwards, toward the level they would have been had the study reported regular cannabis use. Step 2 involved the DisMod-MR modelling of the regular cannabis use (from step 1) and cannabis dependence data. This cannabis regular use/dependence dataset was modelled using a study-level covariate which adjusted estimates of regular cannabis use toward the desirable which were estimates of cannabis dependence.

Study-level covariates were used to accommodate for between-study variability in the raw prevalence data. As mentioned previously, a *cv\_regular use* covariate adjusted all regular use estimates toward the level they would have been if the study had measured cannabis dependence. This covariate was informed by a cannabis regular use: dependence ratio (4.1, 3.9–4.6) estimated outside of DisMod-MR using the same methodology outlined above for the use:regular use ratio. Based on expert advice, a *cv\_nesarc* covariate adjusted all estimates derived from the NESARC toward the level they would have been if they had been derived by other surveys. Drug use disorders are not well-captured in household surveys. This is

especially an issue in NESARC as the sampling strategy used was biased toward less severe cases of drug use disorders. We also tested a cv\_school survey covariate adjusting estimates derived from school surveys to the level they would have been had the study conducted a fully representative population survey; however, this did not have a statistically significant effect on prevalence. Betas and exponentiated values (which can be interpreted as an odds ratio) for each study-level covariate are shown in the table below.

| Study covariate  | Parameter  | beta                   | Exponentiated beta |
|------------------|------------|------------------------|--------------------|
| cv_regular use   | Prevalence | 1.40 (1.40–1.40)       | 4.06 (4.06–4.06)   |
| cv_nesarc        | Prevalence | -0.709 (-0.86 – -0.54) | 0.50 (0.42–0.58)   |
| cv_school survey | Prevalence | 0.03 (-0.05 – 0.12)    | 1.03 (0.956–1.12)  |

## References

1. American Psychiatric Association. Diagnostic and Statistical Manual of Mental Disorders (DSM-IV-TR). 4th, Text Revision ed. Washington DC: American Psychiatric Association; 2000.
2. World Health Organization. The ICD-10 Classification of Mental and Behavioural Disorders. Clinical descriptions and diagnostic guidelines. Geneva: World Health Organization; 1992.
3. Calabria B, Degenhardt L, Briegleb C, et al. Systematic review of prospective studies investigating "remission" from amphetamine, cannabis, cocaine or opioid dependence. *Addictive Behaviors* 2010; **35**(8): 741-9.
4. Calabria B, Degenhardt L, Hall W, Lynskey M. Does cannabis use increase the risk of death? Systematic review of epidemiological evidence on adverse effects of cannabis use. *Drug Alcohol Rev* 2010; **29**(3): 318-30.
5. Calabria B, Degenhardt L, Nelson P, et al. What do we know about the extent of cannabis use and dependence? Results of a global systematic review. Sydney: National Drug and Alcohol Research Centre, University of NSW, 2010.
6. Degenhardt L, Ferrari AJ, Calabria B, et al. The global epidemiology and contribution of cannabis use and dependence to the global burden of disease: results from the GBD 2010 study. *PLoS one* 2013; **8**(10): e76635.
7. Introduction to the National Epidemiologic Survey on Alcohol and Related Conditions [<http://pubs.niaaa.nih.gov/publications/arh29-2/74-78.htm>]. Access date 1 December 2014.



## Other drug use disorders

### Flowchart

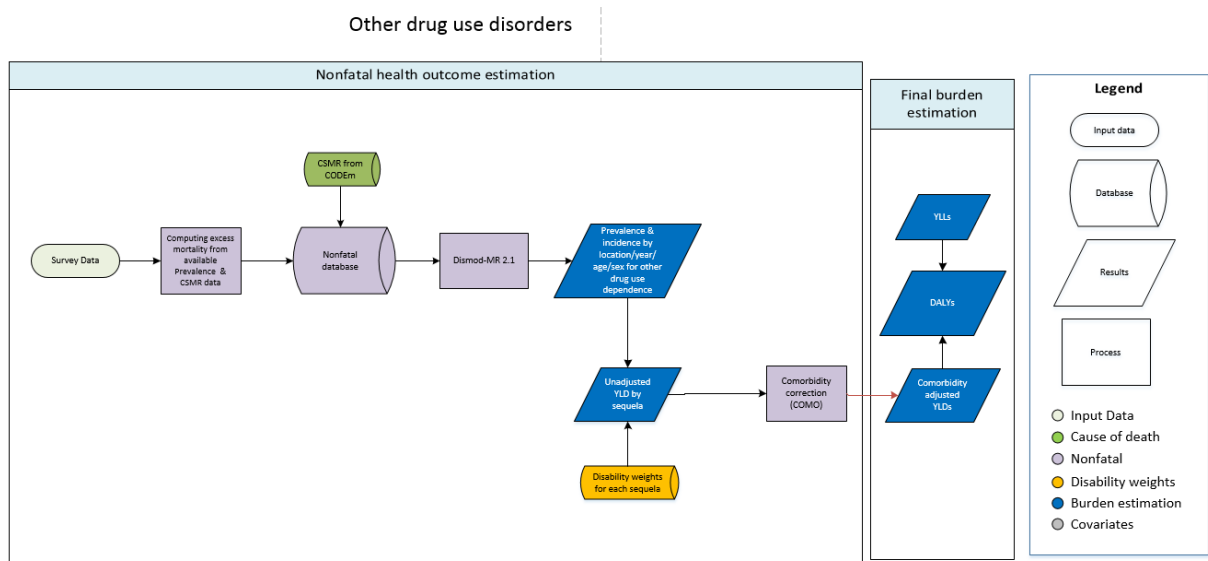

### Case definition

In addition to the four drug use disorders for which we specifically estimate non-fatal burden (opioid, cocaine, amphetamine, and cannabis dependence), we also estimate the burden attributable to a residual cause of “other drug use disorders.” This is made up of an aggregate group of other forms of drug dependence. Included in the GBD disease modelling were cases meeting the Diagnostic and Statistical Manual of Mental Disorders (DSM-IV-TR)<sup>1</sup> or the International Classification of Diseases (ICD-10)<sup>2</sup> diagnostic criteria for:

- Hallucinogen dependence
- Inhalant or solvent dependence
- Sedative dependence
- Tranquilizer dependence
- Other medicines, drugs, substance dependence

According to DSM-IV TR criteria, dependence involves a maladaptive pattern of substance use, leading to clinically significant impairment or distress. At least three of the following symptoms must be experienced within the same 12-month period:

- Tolerance, characterized by either
  - a need for increased amounts of the substance to achieve intoxication; or
  - markedly diminished effect with continued use of the same amount of the substance;
- Withdrawal, characterized by either

- Withdrawal symptoms characteristic to dependence; or
- the same (or similar) substance is taken to avoid withdrawal symptoms;
- Substance taken in progressively larger amounts or for longer period;
- Persistent desire or unsuccessful efforts to reduce substance use;
- Disproportionate time dedicated to obtaining the substance;
- Other important activities are given up because of the substance use; and
- Substance use is continued despite knowledge of physical or psychological problems occurring as a result of the substance.

## Input data

### *Model inputs*

Prevalence estimates were obtained from the Australian National Survey of Mental Health and Wellbeing (NSMHWB) conducted in 1997<sup>3</sup>, and the US National Epidemiological Survey on Alcohol and Related Conditions (NESARC), conducted in two waves in 2001–2002<sup>4</sup> and 2004–2005.<sup>5</sup> Given that other forms of drug dependence often co-occur with the four types of drug dependence for which we estimate non-fatal burden (opioid, cocaine, amphetamine, and cannabis dependence), an adjustment for co-morbidity is important so as not to overestimate the overall burden attributable to drug dependence. Participants meeting criteria for any other form of drug dependence from each of the surveys used were counted as a prevalent case only if they did not simultaneously meet criteria for opioid, cocaine, amphetamine, or cannabis dependence.

### *Severity splits*

The basis of the GBD disability weight survey assessments are lay descriptions of sequelae highlighting major functional consequences and symptoms. The average disability weight estimated for cocaine and amphetamine dependence was applied to all cases in this residual group of other drug use disorders. The cocaine and amphetamine lay descriptions and disability weights are shown below:

| Severity level                | Lay description                                                                                                                                                                                  | DW (95% CI)         |
|-------------------------------|--------------------------------------------------------------------------------------------------------------------------------------------------------------------------------------------------|---------------------|
| <b>Amphetamine dependence</b> |                                                                                                                                                                                                  |                     |
| Mild                          | Uses stimulants (drugs) at least once a week and has some difficulty controlling the habit. When not using, the person functions normally.                                                       | 0.079 (0.051–0.114) |
| Moderate to severe            | Uses stimulants (drugs) and has difficulty controlling the habit. The person sometimes has depression, hallucinations, and mood swings, and has difficulty in daily activities.                  | 0.486 (0.329–0.637) |
| <b>Cocaine dependence</b>     |                                                                                                                                                                                                  |                     |
| Mild                          | Uses cocaine at least once a week and has some difficulty controlling the habit. When not using, the person functions normally.                                                                  | 0.116 (0.074–0.165) |
| Moderate to severe            | Uses cocaine and has difficulty controlling the habit. The person sometimes has mood swings, anxiety, paranoia, hallucinations, and sleep problems, and has some difficulty in daily activities. | 0.479 (0.324–0.634) |

## Modelling Strategy

The GBD 2016 epidemiological modelling strategy made use of DisMod-MR. A number of additional expert priors were used in order to run a full parameter model. We assumed no incidence before age 14, a maximum of 0.0004 on incidence from the age of 60 years onward, and a maximum remission of 0.2. These priors were corroborated with expert feedback and existing literature on drug use disorders including the European Monitoring Centre for Drugs and Drug Addiction.<sup>6</sup> Finally, cause-specific mortality rates (CSMR) from the GBD 2016 cause of death model for other drug use disorders were included as data-points in the DisMod-MR model.

## References

1. American Psychiatric Association. Diagnostic and Statistical Manual of Mental Disorders (DSM-IV-TR). 4th, Text Revision ed. Washington DC: 2000.
2. World Health Organization. The ICD-10 Classification of Mental and Behavioural Disorders. Clinical descriptions and diagnostic guidelines. Geneva: 1992.
3. Australia Bureau of Statistics. Australia National Survey of Mental Health and Wellbeing 1997. Canberra: 1997.
4. National Institute on Alcohol Abuse and Alcoholism (NIAAA), National Institutes of Health (NIH). United States National Epidemiologic Survey on Alcohol and Related Conditions 2001-2002. 2002.
5. National Institute on Alcohol Abuse and Alcoholism (NIAAA), National Institutes of Health (NIH). United States National Epidemiologic Survey on Alcohol and Related Conditions 2004-2005. 2005.
6. European Monitoring Centre for Drugs and Drug Addiction. Lisbon, Portugal: 2014.

# Major Depressive Disorder

## Flowchart

### Major depressive disorder (MDD)

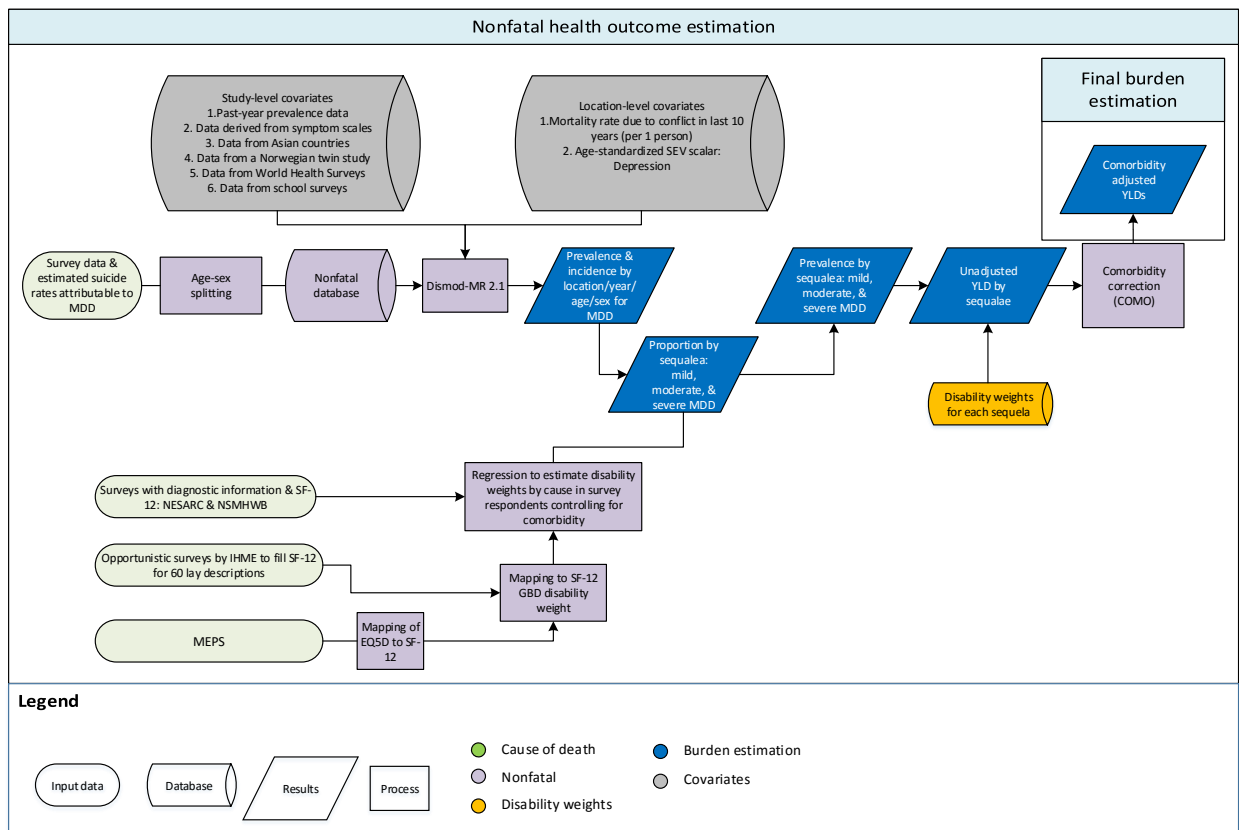

## Case Definition

Major depressive disorder (MDD) is an episodic mood disorder involving the experience of one or more major depressive episode(s). Included in GBD disease modelling were cases meeting diagnostic criteria for MDD according to the Diagnostic and Statistical Manual of Mental Disorders (DSM) or the equivalent diagnosis of recurrent depression in the International Classification of Diseases (ICD). These were identified by the following codes: DSM-IV-TR: 296.21–24, 296.31–34; ICD-10: F32.0–9, F33.0–9; excluding those cases due to a general medical condition or substance induced cases.<sup>1,2</sup>

According to DSM-IV-TR criteria, MDD involves the presence of at least one major depressive episode, which is the experience of depressed mood almost all day, every day, for at least two weeks. Mood must represent a change from the person's baseline and impaired functioning must be observed across social, occupational, and educational domains. Additionally, a total of five out of nine criteria must be met to make a diagnosis and at least one of the five criteria should either be:

- “depressed mood” for most of every day; or
- “loss of interest in nearly all activities” for most of every day.

The other seven criteria are:

- change in eating, appetite or weight;
- excessive sleeping or insomnia;
- agitated or slow motor activity;
- fatigue;
- feeling worthless or inappropriately guilty;
- trouble concentrating; and
- repeated thoughts about death

MDD was modelled as an episodic disorder with the average length of a major depressive episode (ie, duration) specified. This was consistent with previously proposed methodology for the modelling of MDD for burden of disease purposes.<sup>3-5</sup>

## Input data

### *Model Inputs*

For GBD 2010, a systematic review of the literature was conducted to capture studies of prevalence, incidence, duration, and excess mortality associated with MDD. In summary, the search was conducted in three stages involving electronic searches of the peer-reviewed literature (via PsycInfo, Embase and PubMed), the grey literature and, expert consultation. The agreed-upon approach for mental and substance use disorders was to conduct electronic database searches on a rolling basis. All three stages of GBD 2010’s literature review were repeated for GBD 2013 to capture additional data published up to 2013. In GBD 2015, stages two and three of the literature review were conducted, and in GBD 2016, stage 1 was repeated to update our electronic database search to capture data sources published between January 2013 and September 2016.

The inclusion criteria stipulated that: (1) the publication year must be from 1980 onward; (2) “caseness” must be based on clinical threshold as established by the DSM or ICD; (3) sufficient information must be provided on study method and sample characteristics to assess the quality of the study; and (4) study samples must be representative of the general population (ie, inpatient or pharmacological treatment samples, case studies, veterans or refugee samples were excluded). No limitation was set on the language of publication. Methods used for this systematic review have been reported in greater detail elsewhere.<sup>6,7</sup> The table below shows the number of studies included in GBD 2016, as well as the number of countries or subnational units and GBD world regions represented.

|                                   | Prevalence | Incidence | Duration | Excess mortality |
|-----------------------------------|------------|-----------|----------|------------------|
| Studies                           | 361        | 4         | 5        | 23               |
| Countries/subnational geographies | 259        | 4         | 2        | 562              |
| GBD world regions                 | 20         | 2         | 2        | 21               |

## Age- and sex-splitting

In GBD 2016, reported estimates of prevalence were split by age and sex where possible. First, if studies reported prevalence for broad age groups by sex (eg, prevalence in 15 to 65 year old males and females separately), and also by specific age groups but for both sexes combined (eg, prevalence in 15 to 30 year olds, then in 31 to 65 year olds, for males and females combined); age-specific estimates were split by sex using the reported sex ratio and bounds of uncertainty. Second, where studies reported estimates across age groups spanning 20 years or more, these were split into five-year age groups using the prevalence age pattern estimated by DisMod MR 2.1.

## Attributable suicide estimates

Given that MDD is an established risk factor for suicide,<sup>8</sup> in GBD 2016 we supplemented the available data on excess mortality with estimated suicide rates (by age, sex, year, and location) attributable to MDD. These were estimated using GBD's comparative risk assessment methodology whereby the current health status was compared with a theoretical-minimum-risk exposure defined as the counterfactual status of the absence of MDD in the population. Population attributable fractions (PAFs) were estimated using this established formula:

$$PAF = \frac{p(RR - 1)}{p(RR - 1) + 1}$$

P referred to the exposure distribution, which in this case was the DisMod-MR 2.1 prevalence rates of MDD by age, sex, location and year. RR referred to the pooled relative-risk of suicide due to MDD obtained from an existing systematic review and meta-analysis.<sup>8</sup> Age, sex, year, and location-specific PAFs were multiplied by their corresponding GBD suicide rate to estimate the proportion of suicide cases attributable to MDD. These were entered as cause-specific mortality rates in our epidemiological model for MDD.

## Severity splits

The basis of the GBD disability weight survey assessments are lay descriptions of sequelae highlighting major functional consequences and symptoms. The lay descriptions and disability weights for MDD severity levels are shown below.

| Severity level | Lay description                                                                                                                                                                                                 | DW (95% CI)         |
|----------------|-----------------------------------------------------------------------------------------------------------------------------------------------------------------------------------------------------------------|---------------------|
| Mild           | Feels persistent sadness and has lost interest in usual activities. The person sometimes sleeps badly, feels tired, or has trouble concentrating but still manages to function in daily life with extra effort. | 0.145 (0.099–0.209) |
| Moderate       | Has constant sadness and has lost interest in usual activities. The person has some difficulty in daily life, sleeps badly, has trouble concentrating, and sometimes thinks about harming himself (or herself). | 0.396 (0.267-0.531) |
| Severe         | Has overwhelming, constant sadness and cannot function in daily life. The person sometimes loses touch with reality and wants to harm or kill himself (or herself).                                             | 0.658 (0.477-0.807) |

To determine the proportion of people with MDD within each of the severity levels, the US National Epidemiological Survey on Alcohol and Related Conditions (NESARC, conducted in two waves from 2001 to 2002 and 2004 to 2005)<sup>9</sup> and the Australian National Survey of Mental Health and Wellbeing of Adults (NSMHWB, conducted in 1997)<sup>10</sup> were used to estimate the proportion of MDD cases asymptomatic (13%, 10%–17%), mild (59%, 49%–69%), moderate (17%, 13%–22%), and severe (10%, 3%–20%).

## Modelling Strategy

The GBD 2016 epidemiological modelling strategy for MDD made use of DisMod-MR 2.1. Data across all epidemiological parameters were initially included in the modelling process. However, given that the few incidence data points available typically excluded cases of MDD at baseline, new major depressive episodes in people with previous episodes were not counted and incidence was underestimated. For this reason, we chose to exclude all raw incidence data in the final model and instead, allowed DisMod-MR 2.1 to calculate incidence based on data from other parameters. We assumed no incidence and prevalence before age 3. This minimum age of onset was corroborated with expert feedback and existing MDD literature.<sup>6</sup> An average remission rate for a major depressive episode of 1.45 (1.3–1.6) was used. This was derived from the four longitudinal studies<sup>11–14</sup> fitting a lognormal curve with least squared differences to data on the proportion of incident cases still fulfilling the case definition for major depression at intervals over a one-year period. As data were only available for a follow-up of one year, a decision had to be made about the maximum allowable duration of an episode. Setting this at 40 years, the average duration implied by the lognormal fit was 0.65 (0.59–0.70) of a year.<sup>15</sup>

Study-level covariates were used to accommodate between-study variability in the raw prevalence data. A *cv\_past* year recall covariate adjusted all data points derived from past year prevalence toward the level they would have been if the study had captured point/past-month prevalence. The latter prevalence period is less affected by recall bias. A *cv\_symptom* scale covariate adjusted all data points derived using a symptom scale towards the level they would have been if the scale had strictly adhered to DSM or ICD thresholds for MDD. A *cv\_asian* data points covariate was used to adjust all estimates from East Asia, Southeast Asia and Asia Pacific high-income using a ratio based on a study in China. Phillips and collaborators<sup>16</sup> reported that the prevalence of MDD in China was 2.07% while the prevalence of mood disorders not otherwise specified (NOS) was 2.06%. Of the 808 individuals diagnosed with mood disorders NOS, 467 (58%) met criteria for minor depression (defined by DSM-IV-TR as two to four of nine symptoms of depression lasting for  $\geq 2$  weeks). There is evidence to suggest that these reported cases of minor depression are likely misdiagnosed cases MDD as DSM/ICD diagnostic criteria are not sensitive to cross-cultural presentations of MDD in Asia.<sup>16–19</sup> Based on this, a ratio of MDD + minor depression: MDD only (1.53, 1.45–1.63) was derived from data presented by Phillips and collaborators and used to adjust prevalence estimates from Asia in the model. The aim of this adjustment was not to capture sub-syndromal depression but instead, to pick up on diagnoses of MDD where there is evidence to suggest that the use of Western-based criteria have underestimated prevalence. A *cv\_school* survey covariate adjusted estimates derived from school surveys downwards, to the level they would have been had the study conducted a fully representative population survey. A *cv\_World Health Survey* covariate was used to adjust all World Health Survey data downwards. The World Health Surveys are surveys conducted by the World Health Organization in close to 70 countries. While these surveys capture useful information on the prevalence of depression, they make use of a symptom scale which does not fully meet DSM and ICD criteria for MDD. This covariate works in

essentially the same way as the symptom scale covariate in adjusting World Health Survey estimates downwards towards the level they would have been had the study strictly adhered to DSM or ICD thresholds for MDD.

Location-level covariates were also included in the MDD model. A covariate identifying for each GBD location, the mean mortality rate in the previous 10 years due to war and terrorism informed the estimation of prevalence given existing evidence to show a positive association between conflict status and the prevalence of MDD.<sup>20,21</sup> An age-standardised SEV scalar was also included. This made use of the fraction of MDD burden caused by its relevant risk factors combined to inform the estimation of prevalence. Intimate partner violence and childhood sexual violence are the two established risk factors of MDD for which attributable burden is estimated in GBD studies. Betas and exponentiated values (which can be interpreted as an odds ratio) for each study- and country-level covariate are shown in the table below:

| Study/Country covariate                           | Parameter  | beta                  | Exponentiated beta |
|---------------------------------------------------|------------|-----------------------|--------------------|
| cv_asian datapoints                               | Prevalence | -0.43 (-0.48 — -0.37) | 0.65 (0.62 — 0.69) |
| cv_past year recall                               | Prevalence | 0.63 (0.59 — 0.67)    | 1.88 (1.80 — 1.96) |
| cv_symptom scale                                  | Prevalence | 1.00 (0.94 — 1.06)    | 2.72 (2.57 — 2.90) |
| cv_school survey                                  | Prevalence | 0.29 (0.16 — 0.42)    | 1.33 (1.17 — 1.52) |
| cv_world health survey                            | Prevalence | 0.78 (0.71 — 0.85)    | 2.18 (2.04 — 2.35) |
| Mean war mortality rate in the previous ten years | Prevalence | 0.49 (0.022 — 0.98)   | 1.63 (1.02 — 2.65) |
| Age-standardised SEV scalar: Depression           | Prevalence | 0.77 (0.75 — 0.82)    | 2.17 (2.12 — 2.27) |

## Citations

1. American Psychiatric Association. Diagnostic and Statistical Manual of Mental Disorders (DSM). Washington: American Psychiatric Association, 1952.
2. World Health Organization. The ICD-10 Classification of Mental and Behavioural Disorders. Clinical descriptions and diagnostic guidelines. Geneva: World Health Organization; 1992.
3. Vos T, Mathers C, Herrman H, et al. The burden of mental disorders in Victoria, 1996. *Soc Psychiatry Psychiatr Epidemiol* 2001; **36**(2): 53-62.
4. Vos T, Mathers CD. The burden of mental disorders: a comparison of methods between the Australian burden of disease studies and the Global Burden of Disease study. *Bull World Health Organ* 2000; **78**(4): 427-38.
5. Ustun TB, Kessler RC. Global burden of depressive disorders: the issue of duration. *Br J Psychiatry* 2002; **181**: 181-3.
6. Ferrari AJ, Somerville AJ, Baxter AJ, et al. Global variation in the prevalence and incidence of major depressive disorder: a systematic review of the epidemiological literature. *Psychol Med* 2013; **43**(3): 471-81.
7. Ferrari AJ, Charlson FJ, Norman RE, et al. Burden of depressive disorders by country, sex, age, and year: findings from the global burden of disease study 2010. *PLoS Med* 2013; **10**(11): e1001547.
8. Ferrari AJ, Norman RE, Freedman G, et al. The burden attributable to mental and substance use disorders as risk factors for suicide: findings from the Global Burden of Disease Study 2010. *PloS one* 2014; **9**(4): e91936.



9. Introduction to the National Epidemiologic Survey on Alcohol and Related Conditions [<http://pubs.niaaa.nih.gov/publications/arh29-2/74-78.htm>]. Access date 1 December 2014.
10. Australian Bureau of Statistics. National Survey of Mental Health and Wellbeing of Adults 1997. Canberra: Australian Bureau of Statistics.
11. Kendler KS, Walters EE, Kessler RC. The prediction of length of major depressive episodes: results from an epidemiological sample of female twins. *Psychol Med* 1997; **27**(1): 107-17.
12. Lewinsohn PM, Clarke GN, Seeley JR, Rohde P. Major depression in community adolescents: age at onset, episode duration, and time to recurrence. *J Am Acad Child Adolesc Psychiatry* 1994; **33**(6): 809-18.
13. Spijker J, de Graaf R, Bijl RV, Beekman AT, Ormel J, Nolen WA. Duration of major depressive episodes in the general population: results from The Netherlands Mental Health Survey and Incidence Study (NEMESIS). *Br J Psychiatry* 2002; **181**: 208-13.
14. McLeod JD, Kessler RC, Landis KR. Speed of recovery from major depressive episodes in a community sample of married men and women. *J Abnorm Psychol* 1992; **101**(2): 277-86.
15. Vos T, Haby MM, Barendregt JJ, Kruijshaar M, Corry J, Andrews G. The burden of major depression avoidable by longer-term treatment strategies. *Archives of General Psychiatry* 2004; **61**(11): 1097-103.
16. Phillips MR, Zhang J, Shi Q, et al. Prevalence, treatment, and associated disability of mental disorders in four provinces in China during 2001–05: an epidemiological survey. *The Lancet* 2009; **373**: 2041–53.
17. Bromet E, Andrade LH, Hwang I, et al. Cross-national epidemiology of DSM-IV major depressive episode. *BMC medicine* 2011; **9**: 90.
18. Wang PS, Aguilar-Gaxiola S, Alonso J, et al. Use of mental health services for anxiety, mood, and substance disorders in 17 countries in the WHO world mental health surveys. *The Lancet* 2007; **370**(9590): 841-50.
19. Simon GE, Goldberg D, Von Korff M, Ustun T. Understanding cross-national differences in depression prevalence. *Psychological Medicine* 2002; **32**(4): 585–94.
20. Karam E, Bou GM. Psychosocial consequences of war among civilian populations. *Current Opinion in Psychiatry* 2013; **16**(413–419).
21. Steel Z, Chey T, Silove D, Marnane C, Bryant RA, van Ommeren M. Association of torture and other potentially traumatic events with mental health outcomes among populations exposed to mass conflict and displacement: a systematic review and meta-analysis. *JAMA* 2009; **302**(5): 537-49.

# Dysthymia

## Flowchart

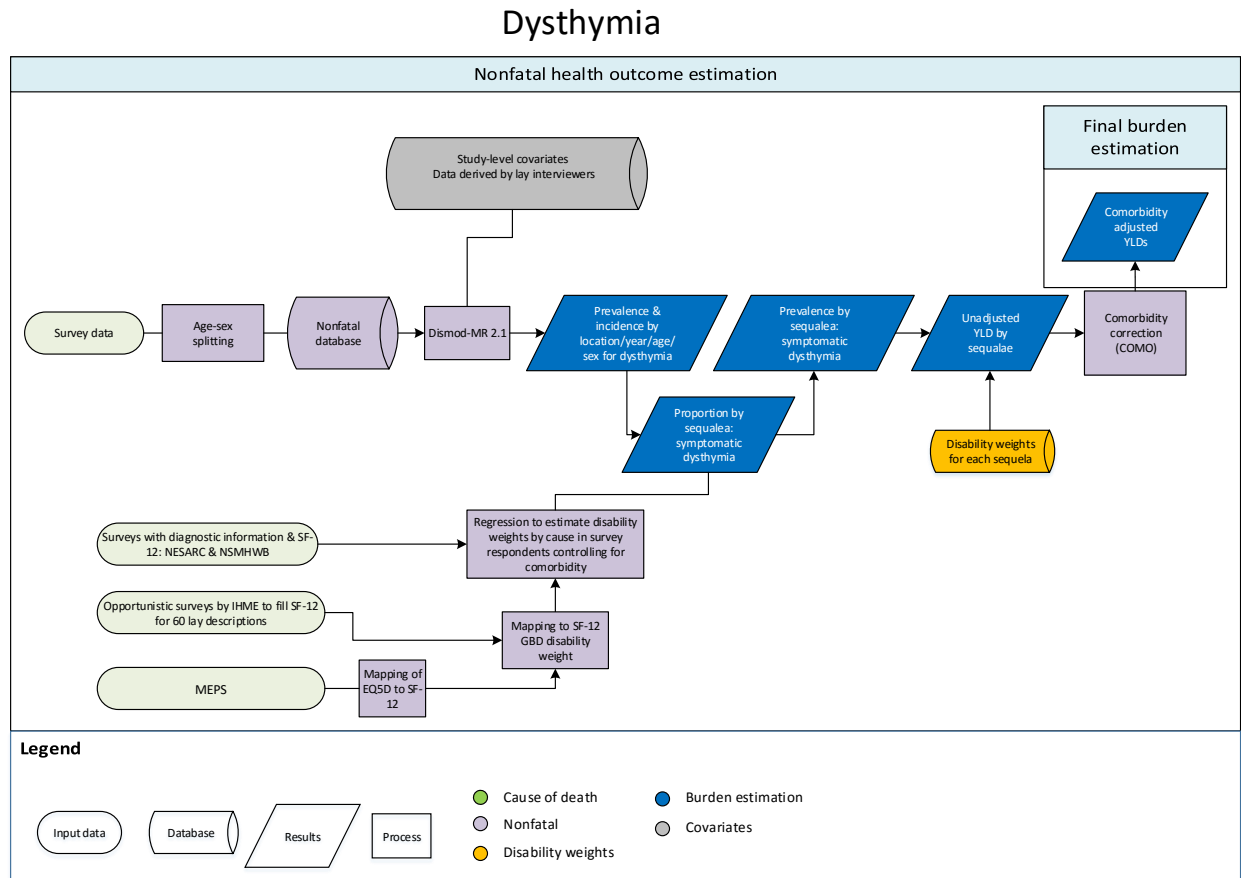

## Case Definition

Dysthymia is a mood disorder consisting of chronic depression, demonstrating less severe but longer-lasting symptoms than major depressive disorder. Included in GBD disease modelling were cases meeting diagnostic criteria for dysthymia according to the Diagnostic and Statistical Manual of Mental Disorders (DSM), or the equivalent diagnosis in the International Classification of Diseases (ICD). These were identified by the following codes: DSM-IV-TR: 300.4, ICD-10: F34.1; excluding those cases due to a general medical condition or substance-induced cases.<sup>1,2</sup>

According to DSM-IV TR criteria, dysthymia involves the experience of chronically depressed mood for most of the day, most days that not, for at least two year (or at least one year in children and adolescents). During this period, at least two of the following symptoms must also be experienced:

- poor appetite or overeating;
- insomnia or hypersomnia;
- low energy or fatigue;

- low self-esteem;
- poor concentration or indecisiveness; and
- feelings of hopelessness

## Input data

### *Model Inputs*

For GBD 2010, a systematic review of the literature was conducted to capture studies of prevalence, incidence, remission, and excess mortality associated with dysthymia. In summary, the search was conducted in three stages involving electronic searches of the peer-reviewed literature (via Medline, Embase, and PubMed), the grey literature and, expert consultation. The agreed-upon approach for mental and substance use disorders was to conduct electronic database searches on a rolling basis. All three stages of GBD 2010’s literature review were repeated for GBD 2013 to capture additional data published up to 2013. In GBD 2015, stages two and three of the literature review were conducted, and in GBD 2016, stage 1 was repeated to update our electronic database search to capture data sources published between January 2013 and September 2016.

The inclusion criteria stipulated that: (1) the publication year must be from 1980 onward; (2) “caseness” must be based on clinical threshold as established by the DSM or ICD; (3) sufficient information must be provided on study method and sample characteristics to assess the quality of the study; and (4) study samples must be representative of the general population (ie, inpatient or pharmacological treatment samples, case studies, veterans, or refugee samples were excluded). No limitation was set on the language of publication. Methods used for this systematic review have been reported in greater detail elsewhere.<sup>3,4</sup> The table below shows the number of studies included in GBD 2016, as well as the number of countries or subnational units and GBD world regions represented.

|                                   | Prevalence | Incidence | Remission | Excess mortality |
|-----------------------------------|------------|-----------|-----------|------------------|
| Studies                           | 99         | 2         | 2         | -                |
| Countries/subnational geographies | 65         | 2         | 2         | -                |
| GBD world regions                 | 12         | 1         | 2         | -                |

### Age- and sex-splitting

In GBD 2016, reported estimates of prevalence were split by age and sex where possible. First, if studies reported prevalence for broad age groups by sex (eg, prevalence in 15 to 65 year old males and females separately), and also by specific age groups but for both sexes combined (eg, prevalence in 15 to 30 year olds, then in 31 to 65 year olds, for males and females combined); age-specific estimates were split by sex using the reported sex ratio and bounds of uncertainty. Second, where studies reported estimates across age groups spanning 20 years or more, these were split into five-year age groups using the prevalence age pattern estimated by DisMod-MR 2.1.

### *Severity splits*

The basis of the GBD disability weight survey assessments are lay descriptions of sequelae highlighting major functional consequences and symptoms. The lay description and disability weight for a symptomatic state of dysthymia are shown below. Given the milder and more stable presentation of dysthymia, it was assigned the same disability weight as that for mild major depressive disorder.

| Severity level        | Lay description                                                                                                                                                                                                 | DW (95% CI)         |
|-----------------------|-----------------------------------------------------------------------------------------------------------------------------------------------------------------------------------------------------------------|---------------------|
| Symptomatic dysthymia | Feels persistent sadness and has lost interest in usual activities. The person sometimes sleeps badly, feels tired, or has trouble concentrating but still manages to function in daily life with extra effort. | 0.145 (0.099–0.209) |

To determine the proportion of people with symptomatic and asymptomatic dysthymia, the US National Epidemiological Survey on Alcohol and Related Conditions (NESARC, conducted in two waves from 2001 to 2002 and 2004 to 2005)<sup>5</sup> and the Australian National Survey of Mental Health and Wellbeing of Adults (NSMHWB, conducted in 1997)<sup>6</sup> were used to estimate the proportion of dysthymia cases asymptomatic (29%, 23%–36%) and symptomatic (71%, 64%–77%).

## Modelling Strategy

The GBD 2016 epidemiological modelling strategy for dysthymia made use of DisMod-MR 2.1. Data across all epidemiological parameters were initially included in the modelling process. The incidence studies reported estimates which were very low relative to the prevalence data. As prevalence studies contributed much greater world coverage than incidence studies, we excluded the incidence data, relying instead on data from the other parameters. We assumed no incidence and prevalence before age 3. This minimum age of onset was corroborated with expert feedback and was consistent with the available data. Excess-mortality was set to 0 as there is no epidemiological evidence to suggest that dysthymia is associated with a statistically significant risk of mortality.<sup>3,4</sup>

Study-level covariates were used to accommodate between-study variability in the raw prevalence data. A cv\_lay interviewer covariate created a crosswalk between prevalence derived from clinically trained interviewers (desirable) and prevalence derived from lay-interviewers. A cv\_past year prevalence covariate was originally included to adjust all data points derived from past year prevalence toward the level they would have been if the study had captured point/past-month prevalence. As the effect of this covariate was not statistically significant, it was excluded from the final model. Given that dysthymia is being modelled as a chronic disorder with a long duration of between six and 10 years, it was not surprising that we did not detect significant variation between point and past-year prevalence.

Betas and exponentiated values (which can be interpreted as an odds ratio) for each study level covariate are shown in the table below:

| Study covariate    | Parameter  | beta                  | Exponentiated beta |
|--------------------|------------|-----------------------|--------------------|
| cv_lay interviewer | Prevalence | -0.36 (-0.50 — -0.23) | 0.70 (0.61 — 0.79) |

Given that there was an overall paucity of epidemiological data available for dysthymia, and the data available were very heterogeneous given differences in the data collection methodology used between

studies, we applied a restriction on location random-effects of -0.3 to 0.3 to further guide the estimation of prevalence.

### Citations

1. American Psychiatric Association. Diagnostic and Statistical Manual of Mental Disorders (DSM-IV-TR). 4th, Text Revision ed. Washington DC: American Psychiatric Association; 2000.
2. World Health Organization. The ICD-10 Classification of Mental and Behavioural Disorders. Clinical descriptions and diagnostic guidelines. Geneva: World Health Organization; 1992.
3. Charlson FJ, Ferrari AJ, Flaxman AD, Whiteford HA. The epidemiological modelling of dysthymia: application for the Global Burden of Disease Study 2010. *J Affect Disord* 2013; **151**(1): 111-20.
4. Ferrari AJ, Charlson FJ, Norman RE, et al. Burden of depressive disorders by country, sex, age, and year: findings from the global burden of disease study 2010. *PLoS Med* 2013; **10**(11): e1001547.
5. Introduction to the National Epidemiologic Survey on Alcohol and Related Conditions [<http://pubs.niaaa.nih.gov/publications/arh29-2/74-78.htm>]. Access date 1 December 2014.
6. Australian Bureau of Statistics. National Survey of Mental Health and Wellbeing of Adults 1997. Canberra: Australian Bureau of Statistics.

# Bipolar disorder

## Flowchart

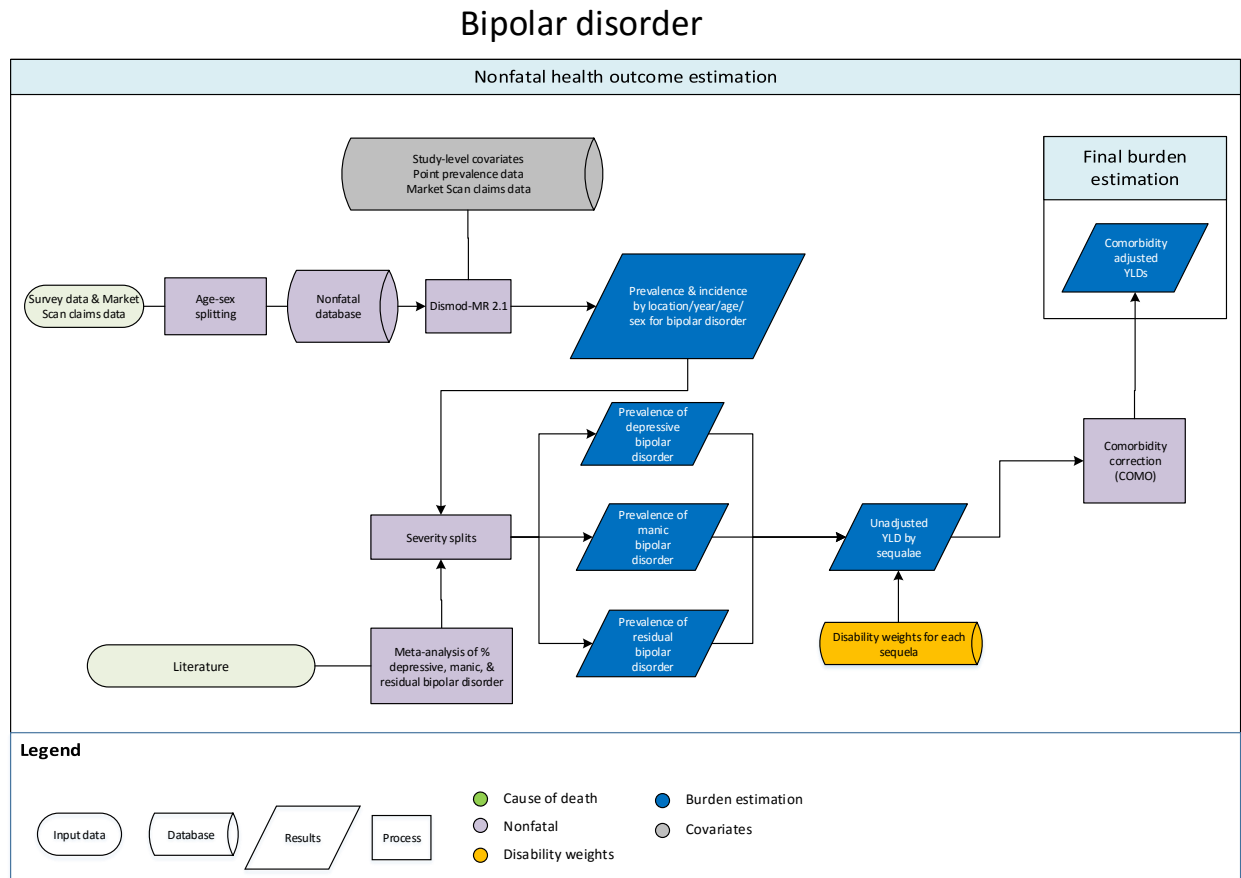

## Case Definition

Bipolar disorder is a chronic mood disorder with little or no complete remission. Included in GBD disease modelling were cases meeting diagnostic criteria for bipolar disorder according to the Diagnostic and Statistical Manual of Mental Disorders (DSM), or the equivalent diagnosis in the International Classification of Diseases (ICD).<sup>1,2</sup> These were identified by the following codes: DSM-IV-TR: 296.0–296.8, 296.89, 301.13; ICD-10: F31.0–F31.6, F31.8–F31.9, F34.0–F34.1, excluding those cases due to a general medical condition or substance induced cases. A diagnosis of bipolar disorder involves the experience of one or more manic or hypomanic episode(s), which can be accompanied by a major depressive episode.

According to DSM-IV-TR a manic episode involves the experience of elevated, expansive, or irritable mood lasting for at least one week. During this period, at least three (or four if mood is only irritable) of the following symptoms must also be experienced;

- inflated self-esteem or grandiosity;
- decreased need for sleep;

- more talkative;
- flight of ideas or experience that thoughts are racing;
- distractibility;
- increase in goal-directed activity; and
- excessive involvement in pleasurable activities with high potential for painful consequences.

A hypomanic episode involves the experience of elevated, expansive, or irritable mood lasting for at least four days. During this period, at least three (or four if mood is only irritable) of the symptoms previously listed for a manic episode must also be experienced.

A major depressive episode involves the experience of depressed mood almost all day, every day, for at least two weeks. A total of five of nine criteria must be met to make a diagnosis and at least one of the five criteria should either be:

- “depressed mood” for most of every day; or
- “loss of interest in nearly all activities” for most of every day.

The other seven criteria are:

- change in eating, appetite, or weight;
- excessive sleeping or insomnia;
- agitated or slow motor activity;
- fatigue;
- feeling worthless or inappropriately guilty;
- trouble concentrating; and
- repeated thoughts about death.

Different subtypes of bipolar disorder can be diagnosed depending on the combination of symptoms experienced. Bipolar I is characterized by at least one manic episode, which can also alternate with a major depressive episode. Bipolar II is characterized by hypomanic episodes alternating with major depressive episodes. Cyclothymia is characterized by subsyndromal hypomanic and major depressive episode episodes. Bipolar disorder not otherwise specified is characterized by clinically significant symptoms of bipolar disorder which do not meet criteria for the other diagnoses.<sup>1,2</sup> In GBD 2016 we estimated burden for the entire spectrum of bipolar disorder simultaneously, rather than individually for each subtype of the disorder. At a minimum, epidemiological studies needed to report on bipolar I and bipolar II combined to be included in analyses.

## Input data

### *Model inputs*

For GBD 2010, a systematic review of the literature was conducted to capture studies of prevalence, incidence, remission, and excess mortality associated with bipolar disorder. In summary, the search was conducted in three stages involving electronic searches of the peer-reviewed literature (via Medline, Embase and PubMed), the grey literature and, expert consultation. The agreed-upon approach for mental and substance use disorders was to conduct electronic database searches on a rolling basis. All three stages of GBD 2010’s literature review were repeated for GBD 2013 to capture additional data

published up to 2013. In GBD 2015, stages two and three of the literature review were conducted, and in GBD 2016, stage 1 was repeated to update our electronic database search to capture data sources published between January 2013 and September 2016.

The inclusion criteria stipulated that: (1) the publication year must be from 1980 onward; (2) “caseness” must be based on clinical threshold as established by the DSM or ICD; (3) sufficient information must be provided on study method and sample characteristics to assess the quality of the study; and (4) study samples must be representative of the general population (ie, inpatient or pharmacological treatment samples, case studies, veterans or refugee samples were excluded). No limitation was set on the language of publication. Methods used for this systematic review have been reported in greater detail elsewhere.<sup>3</sup> As previously explained, burden was estimated for the entire spectrum of bipolar disorder simultaneously. Combined estimates of all subtypes of bipolar disorders were required. Studies reporting separate estimates for bipolar I, bipolar II, cyclothymia, and/or bipolar not otherwise specified were accepted if sufficient information was available to sum the disorder-specific estimates. At a minimum, studies needed to report on bipolar I and bipolar II. The table below shows the number of studies included in GBD 2016, as well as the number of countries or subnational units and GBD world regions represented.

|                                   | Prevalence | Incidence | Remission | Excess mortality |
|-----------------------------------|------------|-----------|-----------|------------------|
| Studies                           | 58         | 3         | -         | 13               |
| Countries/subnational geographies | 96         | 2         | -         | 12               |
| GBD world regions                 | 12         | 2         | -         | 4                |

#### Age- and sex-splitting

In GBD 2016, reported estimates of prevalence were split by age and sex where possible. First, if studies reported prevalence for broad age groups by sex (eg, prevalence in 15 to 65 year old males and females separately) and by specific age groups but for both sexes combined (eg, prevalence in 15 to 30 year olds, then in 31 to 65 year olds, for males and females combined), age-specific estimates were split by sex using the reported sex ratio and bounds of uncertainty. Second, where studies reported estimates across age groups spanning 20 years or more, these were split into five-year age groups using the prevalence age pattern estimated by DisMod-MR 2.1.

#### MarketScan data

In GBD 2016, we made use of United States (US) MarketScan data in our prevalence dataset for the years 2010 and 2012. These were prevalence data for bipolar disorder derived from claims information in a database of private and public insurance schemes. Given the sparseness of the bipolar disorder prevalence dataset, this allowed us to incorporate detailed prevalence estimates by state, sex, and age in our modelling. Evaluation of the age-pattern of MarketScan data revealed that it was consistent to what can be observed in population-representative survey estimates; however, given that this data source only captures a subset of the population, the actual levels of prevalence and the sex difference in prevalence were not and had to be adjusted accordingly. These adjustments are discussed further in the section on “Modelling strategy.”

#### *Severity splits inputs*



The basis of the GBD disability weight survey assessments are lay descriptions of sequelae highlighting major functional consequences and symptoms. The lay descriptions and disability weights for bipolar disorder severity levels are shown below.

| Severity level | Lay description                                                                                                                                                                                                 | DW (95% CI)         |
|----------------|-----------------------------------------------------------------------------------------------------------------------------------------------------------------------------------------------------------------|---------------------|
| Manic          | Is hyperactive, hears and believes things that are not real, and engages in impulsive and aggressive behavior that endanger the person and others.                                                              | 0.492 (0.341–0.646) |
| Depressive*    | Has constant sadness and has lost interest in usual activities. The person has some difficulty in daily life, sleeps badly, has trouble concentrating, and sometimes thinks about harming himself (or herself). | 0.396 (0.267–0.531) |
| Residual       | Has mild mood swings, irritability, and some difficulty with daily activities.                                                                                                                                  | 0.032 (0.018–0.051) |

*Note.* \*Equivalent to the disability weight estimated for moderate major depressive disorder

Information on the distribution of manic, depressive, and residual states of bipolar disorder was obtained from a separate systematic review of the literature.<sup>5</sup> Meta-XL (a Microsoft Excel add-in for meta-analysis) was used to pool estimates across all studies to calculate the overall proportion of bipolar cases in each health state. Six studies provided information on the proportion of bipolar disorder cases in a manic (21%, 12%–33%), depressive (23%, 10%–39%) or residual state (52%, 28%–77%).

## Modelling strategy

The GBD 2016 epidemiological modelling strategy for bipolar disorder made use of DisMod-MR 2.1. Data across all epidemiological parameters were initially included in the modelling process. The two studies on incidence reported 0% and 0.1% incidence of bipolar disorder and were low relative to the prevalence data. They were excluded from the final model where incidence was estimated using data from other parameters. We assumed no incidence and prevalence before age 10. Remission was set to a maximum of 0.05 in agreement with literature and expert advice suggesting no or very little complete remission from bipolar disorder.<sup>6,7</sup>

Study-level covariates were used to accommodate for between-study variability in the raw prevalence data. A *cv\_point recall* covariate adjusted all data points derived from point/past-month prevalence toward the level they would have been if the study had captured 12-month prevalence. We set 12-month prevalence as the desirable level due to the episodic nature of bipolar disorder. Estimates of point prevalence surveying symptoms experienced in the past 30 days or less may fail to diagnose cases of bipolar disorder in a residual state, thereby underestimating prevalence. Two *cv\_market scan* covariates for the years 2010 and 2012 adjusted MarketScan prevalence estimates upward toward the level they would have been had they been representative of the general population. The ratio used for this upward adjustment was estimated outside of DisMod-MR 2.1 by comparing modelled prevalence estimates for the US before MarketScan data were included in the model and corresponding MarketScan data points. MetaXL (a meta-analysis add-in for Microsoft Excel) was used to estimate the

adjustment ratio whereby Market scan estimates were 1.42 (1.28–1.58) times lower than prevalence estimated from survey data representative of the general US population.

The corresponding beta and exponentiated value (which can be interpreted as an odds ratio) is shown in the table below:

| Study covariate     | Parameter  | beta                  | Exponentiated beta |
|---------------------|------------|-----------------------|--------------------|
| cv_point recall     | Prevalence | -0.60 (-0.90 — -0.42) | 0.55 (0.41 — 0.66) |
| cv_market scan 2010 | Prevalence | -0.35 (-0.44 — -0.28) | 0.71 (0.64 — 0.76) |
| Cv_market scan 2012 | Prevalence | -0.32 (-0.42 — -0.25) | 0.73 (0.66 — 0.78) |

An analysis of the sex pattern in MarketScan data also showed that the male: female prevalence ratio was 0.68 (0.62–0.76) compared to 0.88 (0.80–0.97) in population-representative survey data. It is likely that females are overrepresented in claims data for bipolar disorder as they are more likely to make use of such services. So as not to bias our sex pattern in prevalence, the estimated sex ratio in population-representative survey data was used as a setting to guide the sex pattern in our estimation of prevalence.

Given that there was an overall paucity in epidemiological data available for bipolar disorder, and the data available were very heterogeneous given differences in the data-collection methodology used between studies, we applied a restriction on location random-effects of -0.3 to 0.3 to further guide the estimation of prevalence.

## Citations

1. American Psychiatric Association. Diagnostic and Statistical Manual of Mental Disorders (DSM). Washington: American Psychiatric Association, 1952.
2. World Health Organization. The ICD-10 Classification of Mental and Behavioural Disorders. Clinical descriptions and diagnostic guidelines. Geneva: World Health Organization; 1992.
3. Ferrari AJ, Baxter AJ, Whiteford HA. A systematic review of the global distribution and availability of prevalence data for bipolar disorder. *J Affect Disord* 2011; **134**(1-3): 1-13.
4. Ferrari AJ, Norman RE, Freedman G, et al. The burden attributable to mental and substance use disorders as risk factors for suicide: findings from the Global Burden of Disease Study 2010. *PLoS One* 2014; **9**(4): e91936.
5. Ferrari AJ, Saha S, McGrath JJ, et al. Health states for schizophrenia and bipolar disorder within the Global Burden of Disease 2010 Study. *Population health metrics* 2012; **10**(1): 16.
6. Angst J, Sellaro R. Historical perspectives and natural history of bipolar disorder. *Biological Psychiatry* 2000; **48**(6): 445–57.
7. Colom F, Vieta E. The road to DSM-V. Bipolar disorder episode and course specifiers. *Psychopathology* 2009; **42**(4): 209–18.

# Anxiety Disorders

## Flowchart

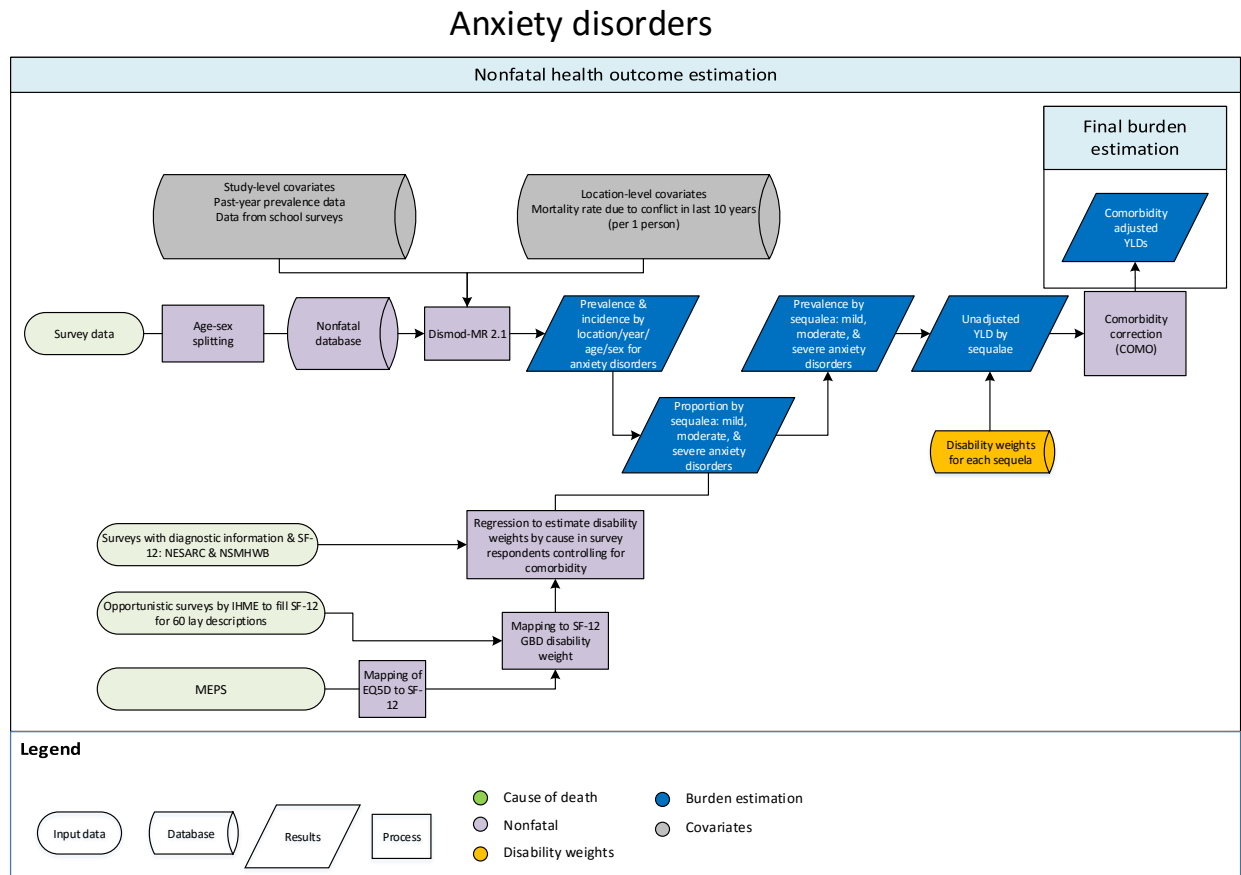

## Case Definition

Anxiety disorders are characterized by experiences of intense of fear and distress, typically in combination with other physiological symptoms. We aimed to capture all cases of anxiety disorders reaching diagnostic threshold defined by the Diagnostic and Statistical Manual of Mental Disorders (DSM) or the WHO International Classification of Diseases (ICD-10).<sup>1,2</sup> Included disorders are listed below and can be identified by the DSM-IV-TR and ICD-10 coding systems as: DSM IV TR: 299.8, 300.0-300.3, 309.21, 309.81 and ICD-10: F40-42, F43.1, F93.0-93.2, F93.8. Excluded were anxiety disorders due to a general medical condition and substance-induced anxiety disorder.

- panic disorder;
- agoraphobia;
- specific phobia;
- social phobia;
- obsessive-compulsive disorder;

- post-traumatic stress disorder;
- acute stress disorder;
- generalized anxiety disorder;
- separation anxiety disorder; and
- anxiety disorder not otherwise specified

As specific anxiety disorders frequently co-occur, anxiety disorders were modeled as a single cause for “any” anxiety disorder in GBD 2016 to avoid the double-counting of individuals meeting criteria for more than one anxiety disorder. Epidemiological estimates reporting an outcome for “any” or “total” anxiety disorders were included in analyses.

## Input data

### *Model inputs*

For GBD 2010, a systematic review of the literature was conducted to capture studies of prevalence, incidence, remission, and excess mortality associated with anxiety disorders. In summary, the search was conducted in three stages involving electronic searches of the peer-reviewed literature (via Medline, Embase, and PubMed), the grey literature and, expert consultation. The agreed-upon approach for mental and substance use disorders was to conduct electronic database searches on a rolling basis. All three stages of GBD 2010’s literature review were repeated for GBD 2013 to capture additional data published up to 2013. In GBD 2015, stages two and three of the literature review were conducted, and in GBD 2016, stage 1 was repeated to update our electronic database search to capture data sources published between January 2013 and August 2016.

The inclusion criteria stipulated that: (1) the publication year must be from 1980 onward; (2) “caseness” must be based on clinical threshold as established by the DSM or ICD; (3) sufficient information must be provided on study method and sample characteristics to assess the quality of the study; and (4) study samples must be representative of the general population (ie, inpatient or pharmacological treatment samples, case studies, veterans, or refugee samples were excluded). No limitation was set on the language of publication. Methods used for this systematic review have been reported in greater detail elsewhere.<sup>3-5</sup> The table below shows the number of studies included in GBD 2016, as well as the number of countries or subnational units and GBD world regions represented.

|                                   | Prevalence | Incidence | Remission |
|-----------------------------------|------------|-----------|-----------|
| Studies                           | 139        | 2         | 3         |
| Countries/subnational geographies | 105        | 2         | 3         |
| GBD world regions                 | 17         | 2         | 2         |

### Age- and sex-splitting

In GBD 2016, reported estimates of prevalence were split by age and sex where possible. First, if studies reported prevalence for broad age groups by sex (eg, prevalence in 15 to 65 year old males and females separately), and also by specific age groups but for both sexes combined (eg, prevalence in 15 to 30 year olds, then in 31 to 65 year olds, for males and females combined); age-specific estimates were split by sex using the reported sex ratio and bounds of uncertainty. Second, where studies reported estimates

across age groups spanning 20 years or more, these were split into five-year age groups using the prevalence age pattern estimated by DisMod-MR 2.1.

### *Severity splits*

The basis of the GBD disability weight survey assessments are lay descriptions of sequelae highlighting major functional consequences and symptoms. The lay descriptions and disability weights for anxiety disorder severity levels are shown below.

| Severity level | Lay description                                                                                                                                                                  | DW (95% CI)         |
|----------------|----------------------------------------------------------------------------------------------------------------------------------------------------------------------------------|---------------------|
| Mild           | Feels mildly anxious and worried, which makes it slightly difficult to concentrate, remember things, and sleep. The person tires easily but is able to perform daily activities. | 0.03 (0.018–0.046)  |
| Moderate       | Feels anxious and worried, which makes it difficult to concentrate, remember things, and sleep. The person tires easily and finds it difficult to perform daily activities.      | 0.133 (0.091–0.186) |
| Severe         | Constantly feels very anxious and worried, which makes it difficult to concentrate, remember things, and sleep. The person has lost pleasure in life and thinks about suicide.   | 0.523 (0.362–0.677) |

To determine the proportion of people with anxiety disorders within each of the severity levels, the United States' Medical Expenditure Panel Survey (MEPS, conducted in annual waves since 1996)<sup>6</sup>, the US National Epidemiological Survey on Alcohol and Related Conditions (NESARC, conducted in two waves from 2001 to 2002 and 2004 to 2005)<sup>7</sup>, and the Australian National Survey of Mental Health and Wellbeing of Adults (NSMHWB, conducted in 1997)<sup>8</sup> were used to estimate the proportion of anxiety disorder cases asymptomatic (28.8%, 27.5%–30.1%), mild (39.3%, 34.2%–44.2%), moderate (19.1%, 15.8%–22.7%) and severe (12.7%, 9.2%–16.7%).

### **Modelling strategy**

The GBD 2016 epidemiological modelling strategy for anxiety disorders made use of DisMod-MR 2.1. Data across all epidemiological parameters were initially included in the modelling process. The incidence studies reported estimates which were very low relative to the prevalence data. As prevalence studies contributed much greater world coverage than incidence studies, we excluded the incidence data, relying instead on data from the other parameters. We assumed no incidence and prevalence before age 2 and after age 95. This minimum age of onset was corroborated with expert feedback and existing literature on anxiety disorders. Remission was set to a maximum of 0.2, consistent with the data points available.

Study-level covariates were used to accommodate for between-study variability in the raw prevalence data. A *cv\_past* year recall covariate adjusted all data points derived from past year prevalence toward

the level they would have been if the study had captured point/past-month prevalence. The latter prevalence period is less affected by recall bias. A cv\_school survey covariate adjusted estimates derived from school surveys downward to the level they would have been had the study conducted a fully representative population survey. A country-level covariate identifying for each GBD location the mean mortality rate in the previous 10 years due to war and terrorism was also included in the anxiety disorders model. This informed the estimation of prevalence given existing evidence to show a positive association between conflict status and the prevalence for anxiety disorders.<sup>9,10</sup> Betas and exponentiated values (which can be interpreted as an odds ratio) for each study-level covariate are shown in the table below:

| Study/country covariate                          | Parameter  | beta                | Exponentiated beta |
|--------------------------------------------------|------------|---------------------|--------------------|
| cv_past year recall                              | Prevalence | 0.36 (0.30 — 0.42)  | 1.43 (1.36 — 1.53) |
| cv_school survey                                 | Prevalence | 0.30 (0.15 — 0.46)  | 1.35 (1.17 — 1.58) |
| Mean war mortality rate in the previous 10 years | Prevalence | 0.50 (0.030 — 0.97) | 1.66 (1.03 — 2.65) |

## Citations

1. American Psychiatric Association. Diagnostic and Statistical Manual of Mental Disorders (DSM-IV-TR). Fourth Edition, Text Revision ed. Washington DC: American Psychiatric Association; 2000.
2. World Health Organization. The ICD-10 Classification of Mental and Behavioural Disorders. Clinical descriptions and diagnostic guidelines. Geneva: World Health Organization; 1992.
3. Baxter AJ, Scott KM, Vos T, Whiteford HA. Global prevalence of anxiety disorders: a systematic review and meta-regression. *Psychological Medicine* 2013; **43**(05): 897-910.
4. Baxter AJ, Vos T, Scott KM, Ferrari AJ, Whiteford HA. The global burden of anxiety disorders in 2010. *Psychological Medicine* 2014; **44**(11): 2363-74.
5. Ferrari AJ, Norman RE, Freedman G, et al. The burden attributable to mental and substance use disorders as risk factors for suicide: findings from the Global Burden of Disease Study 2010. *PLoS One* 2014; **9**(4): e91936.
6. Agency for Healthcare Research and Quality. United States Medical Expenditure Panel Survey. Rockville, United States: Agency for Healthcare Research and Quality.
7. Introduction to the National Epidemiologic Survey on Alcohol and Related Conditions [<http://pubs.niaaa.nih.gov/publications/arh29-2/74-78.htm>]. Access date 1 December 2014.
8. Australian Bureau of Statistics. National Survey of Mental Health and Wellbeing of Adults 1997. Canberra: Australian Bureau of Statistics.
9. Karam E, Bou GM. Psychosocial consequences of war among civilian populations. *Current Opinion in Psychiatry* 2013; **16**(413-419).
10. Steel Z, Chey T, Silove D, Marnane C, Bryant RA, van Ommeren M. Association of torture and other potentially traumatic events with mental health outcomes among populations exposed to mass conflict and displacement: a systematic review and meta-analysis. *JAMA* 2009; **302**(5): 537-49.

# Anorexia Nervosa

## Flowchart

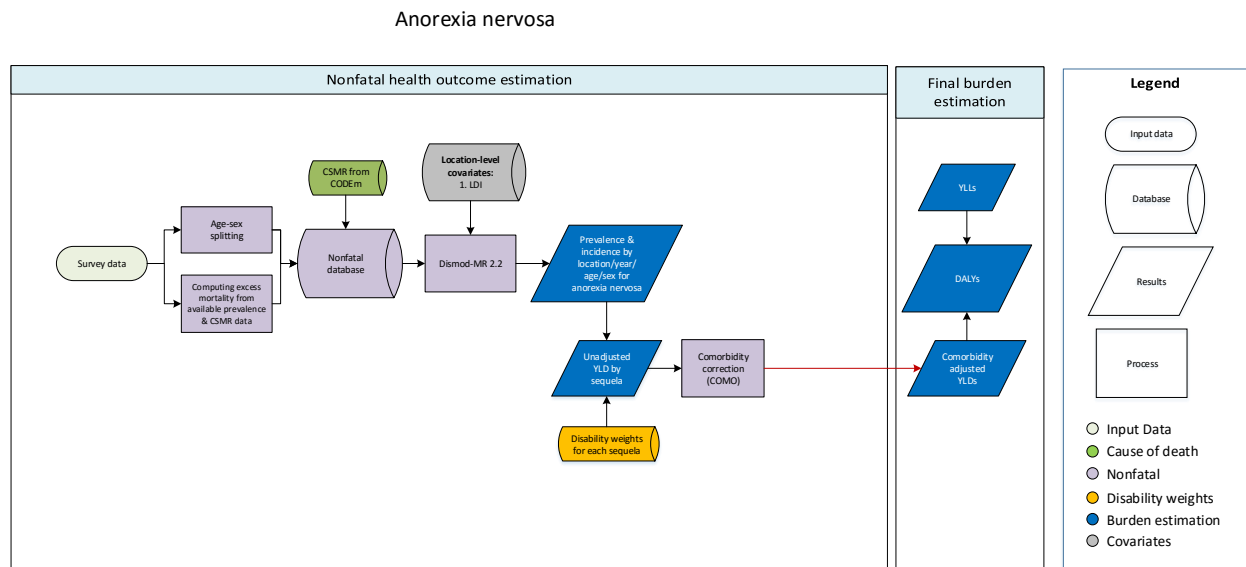

## Case definition

According to the Diagnostic and Statistical Manual of Mental Disorders fourth edition, text revision (DSM-IV-TR),<sup>1</sup> anorexia nervosa (AN) is an eating disorder characterized by:

- a) Refusal to maintain body weight at or above a minimally normal weight for age and height (eg, weight loss leading to maintenance of body weight less than 85% of that expected; or failure to make expected weight gain during period of growth, leading to body weight less than 85% of that expected).
- b) Intense fear of gaining weight or becoming fat, even though underweight (expanded to include any behavior that interferes with weight gain in DSM-5<sup>2</sup>).
- c) Disturbance in the way in which one's body weight or shape is experienced, undue influence of body weight or shape on self-evaluation, or denial of the seriousness of the current low body weight.
- d) In postmenarcheal females, amenorrhea, ie, the absence of at least three consecutive menstrual cycles (this criterion was removed in DSM-5<sup>2</sup>).

Included in GBD were cases meeting diagnostic criteria according to DSM<sup>1</sup> or the International Classification of Diseases (ICD).<sup>3</sup> These were identified by the following codes: 307.1 (DSM-IV-TR) and F50.0 (ICD-10). Different versions of DSM (DSM-III, DSM-III-R, DSM-IV, DSM-IV-TR, and DSM-5) and ICD (ICD-9 and ICD-10) were accepted.

## Input data

### *Model inputs*

A series of systematic literature reviews were conducted to capture studies reporting the prevalence, incidence, remission, and excess mortality of AN. The reviews incorporated searches of peer-reviewed literature via electronic databases, investigations of grey literature, and consultation with experts. In order for a study to be included, it must have been published during or after 1980, use DSM or ICD criteria to define cases, provide sufficient details on study methodology and sample characteristics to determine study quality, and be representative of the general population rather than a special population, eg, prison inmates. No limitation was set on the language of publication. Detailed descriptions of this methodology have been published elsewhere.<sup>4</sup> This methodology was utilized in GBD 2010, GBD 2013, and GBD 2015. The systematic review will be updated again for GBD 2017.

The final dataset for GBD 2016 included 110 prevalence estimates, 35 incidence estimates, 20 remission estimates, and 28 excess mortality estimates. The table below shows the number of studies for each parameter as well as the number of countries/subnationals and GBD world regions covered by the available data.

|                        | Prevalence | Incidence | Remission | Mortality |
|------------------------|------------|-----------|-----------|-----------|
| Studies                | 49         | 6         | 19        | 22        |
| Countries/subnationals | 35         | 6         | 15        | 14        |
| GBD world regions      | 10         | 2         | 4         | 3         |

### *Disability weight*

No severity splits were applied to AN. The lay description and disability weight for AN are shown in the table below.

| Lay description                                                                                                            | DW (95% CI)         |
|----------------------------------------------------------------------------------------------------------------------------|---------------------|
| Feels an overwhelming need to starve and exercises excessively to lose weight. The person is very thin, weak, and anxious. | 0.224 (0.150–0.312) |

## Modelling strategy

We assumed no incidence prior to age 5 or from 50 years onward. These settings are in line with those placed on the corresponding cause of death model for anorexia nervosa. A cap of 0.6 was placed on remission in order to obtain a more plausible fit of the model. We used the function in DisMod-MR 2.2 to pull in cause-specific mortality rate (CSMR) data from our CODEm and CODcorrect analyses. As such, other mortality data (standardized mortality ratios and relative risks) were excluded. We also used these CSMR data to estimate priors on excess mortality rates (EMR) by matching them with prevalence data points for the same geography and study year and dividing CSMR by prevalence. A country-level covariate, lagged distributed income (LDI), was included. This covariate represents a moving average of gross domestic product (GDP) over time. The limits placed on this covariate meant that prevalence was assumed to increase with rising GDP. LDI was also applied to excess mortality data in order to better inform regional distribution. The table below illustrates the covariates, parameters, beta and exponentiated beta values for AN.



| Covariate           | Parameter        | beta                  | Exponentiated beta |
|---------------------|------------------|-----------------------|--------------------|
| LDI (\$ per capita) | Prevalence       | 0.43 (0.28–0.50)      | 1.54 (1.32–1.64)   |
| LDI (\$ per capita) | Excess mortality | -0.36 (-0.49 – -0.13) | 0.70 (0.61–0.88)   |

## References

1. American Psychiatric Association. Diagnostic and Statistical Manual of Mental Disorders (DSM-IV-TR). 4th, Text Revision ed. Washington DC: American Psychiatric Association; 2000.
2. American Psychiatric Association. Diagnostic and Statistical Manual of Mental Disorders, Fifth Edition. Arlington, VA: American Psychiatric Association; 2013.
3. World Health Organisation. ICD-10 Classification of Mental and Behavioural Disorders: Clinical descriptions and diagnostic guidelines. Geneva: World Health Organisation; 1992.
4. Whiteford HA, Degenhardt L, Rehm J, et al. Global burden of disease attributable to mental and substance use disorders: findings from the Global Burden of Disease Study 2010. *The Lancet* 2013; **382**(9904): 1575-86.

# Bulimia nervosa

## Flowchart

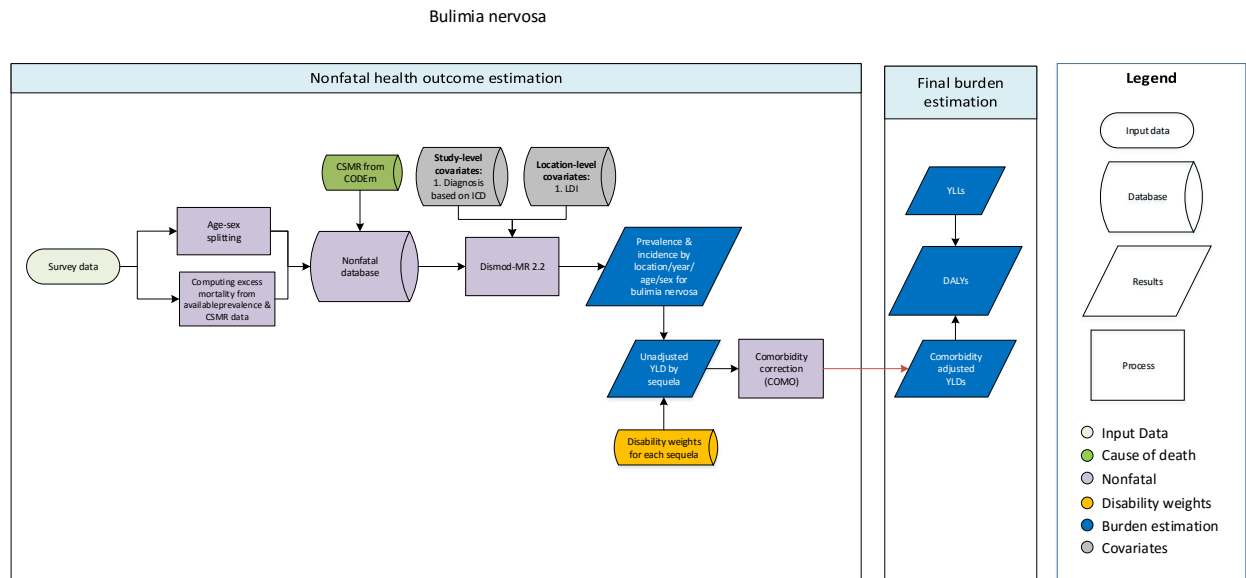

## Case definition

According to the Diagnostic and Statistical Manual of Mental Disorders fourth edition, text revision (DSM-IV-TR),<sup>1</sup> bulimia nervosa (BN) is an eating disorder characterized by:

- Recurrent episodes of binge eating. An episode of binge eating is characterized by both of the following:
  - eating, in a discrete period of time (eg, within any two-hour period), an amount of food that is definitely larger than most people would eat during a similar period of time and under similar circumstances
  - a sense of lack of control over eating during the episode (eg, a feeling that one cannot stop eating or control what or how much one is eating)
- Recurrent inappropriate compensatory behavior in order to prevent weight gain, such as self-induced vomiting; misuse of laxatives, diuretics, enemas, or other medications; fasting; or excessive exercise.
- The binge eating and inappropriate compensatory behaviors both occur, on average, at least twice a week for three months (changed to once a week for three months in DSM-5<sup>2</sup>).
- Self-evaluation is unduly influenced by body shape and weight.
- The disturbance does not occur exclusively during episodes of anorexia nervosa.

Included in GBD were cases meeting diagnostic criteria according to DSM<sup>1</sup> or the International Classification of Diseases (ICD).<sup>3</sup> These were identified by the following codes: 307.51 (DSM-IV-TR) and F50.1 (ICD-10). Different versions of DSM (DSM-III, DSM-III-R, DSM-IV, DSM-IV-TR, and DSM-5) and ICD (ICD-9 and ICD-10) were accepted.

## Input data

### *Model inputs*

A series of systematic literature reviews were conducted to capture studies reporting the prevalence, incidence, remission, and excess mortality of BN. The reviews incorporated searches of peer-reviewed literature via electronic databases, investigations of grey literature, and consultation with experts. In order for a study to be included, it must have been published during or after 1980, use DSM or ICD criteria to define cases, provide sufficient details on study methodology and sample characteristics to determine study quality, and be representative of the general population rather than a special population, eg, prison inmates. No limitation was set on the language of publication. Detailed descriptions of this methodology have been published elsewhere.<sup>4</sup> This methodology was utilized in GBD 2010, GBD 2013, and GBD 2015. The systematic review will be updated again for GBD 2017.

The final dataset for GBD 2016 included 120 prevalence estimates, 14 incidence estimates, 14 remission estimates, and 11 excess mortality estimates. The table below shows the number of studies for each parameter as well as the number of countries/subnationals and GBD world regions covered by the available data.

|                        | Prevalence | Incidence | Remission | Mortality |
|------------------------|------------|-----------|-----------|-----------|
| Studies                | 49         | 4         | 14        | 11        |
| Countries/subnationals | 36         | 4         | 11        | 9         |
| GBD world regions      | 11         | 1         | 3         | 2         |

### *Disability weight*

No severity splits were applied to BN. The lay description and disability weight for BN is shown in the table below.

| Lay description                                                                       | DW (95% CI)         |
|---------------------------------------------------------------------------------------|---------------------|
| Has uncontrolled overeating followed by guilt, starving, and vomiting to lose weight. | 0.223 (0.149–0.311) |

## Modelling strategy

We assumed no incidence prior to 10 years of age or onward from 40 years of age. We used the function in DisMod-MR 2.2 to pull in cause-specific mortality rate (CSMR) data from our CODEm and CODcorrect analyses. As such, other mortality data (standardized mortality ratios and relative risks) were excluded. We also used CSMR data to estimate priors on excess mortality rates (EMR) by matching them with prevalence data points for the same geography and study year and dividing CSMR by prevalence. A study-level covariate was applied which adjusted estimates based on ICD criteria toward those based on DSM criteria. A country-level covariate, lagged distributed income (LDI), was also included. This covariate represents a moving average of gross domestic product (GDP) over time. The limits placed on this covariate meant that prevalence was assumed to increase with rising GDP. LDI was also applied to excess mortality data in order to better inform regional distribution. The table below illustrates the covariates, parameters, beta and exponentiated beta values for BN.

| Covariate          | Parameter  | beta              | Exponentiated beta |
|--------------------|------------|-------------------|--------------------|
| ICD classification | Prevalence | 0.66 (0.015–1.34) | 1.93 (1.01–3.80)   |

|     |                  |                       |                  |
|-----|------------------|-----------------------|------------------|
| LDI | Prevalence       | 0.43 (0.26–0.50)      | 1.53 (1.30–1.65) |
| LDI | Excess mortality | -0.33 (-0.49 – -0.12) | 0.72 (0.61–0.89) |

**References**

1. American Psychiatric Association. Diagnostic and Statistical Manual of Mental Disorders (DSM-IV-TR). 4th, Text Revision ed. Washington DC: American Psychiatric Association; 2000.
2. American Psychiatric Association. Diagnostic and Statistical Manual of Mental Disorders, Fifth Edition. Arlington, VA: American Psychiatric Association; 2013.
3. World Health Organisation. ICD-10 Classification of Mental and Behavioural Disorders: Clinical descriptions and diagnostic guidelines. Geneva: World Health Organisation; 1992.
4. Whiteford HA, Degenhardt L, Rehm J, et al. Global burden of disease attributable to mental and substance use disorders: findings from the Global Burden of Disease Study 2010. *The Lancet* 2013; **382**(9904): 1575-86.

# Autism

## Flowchart

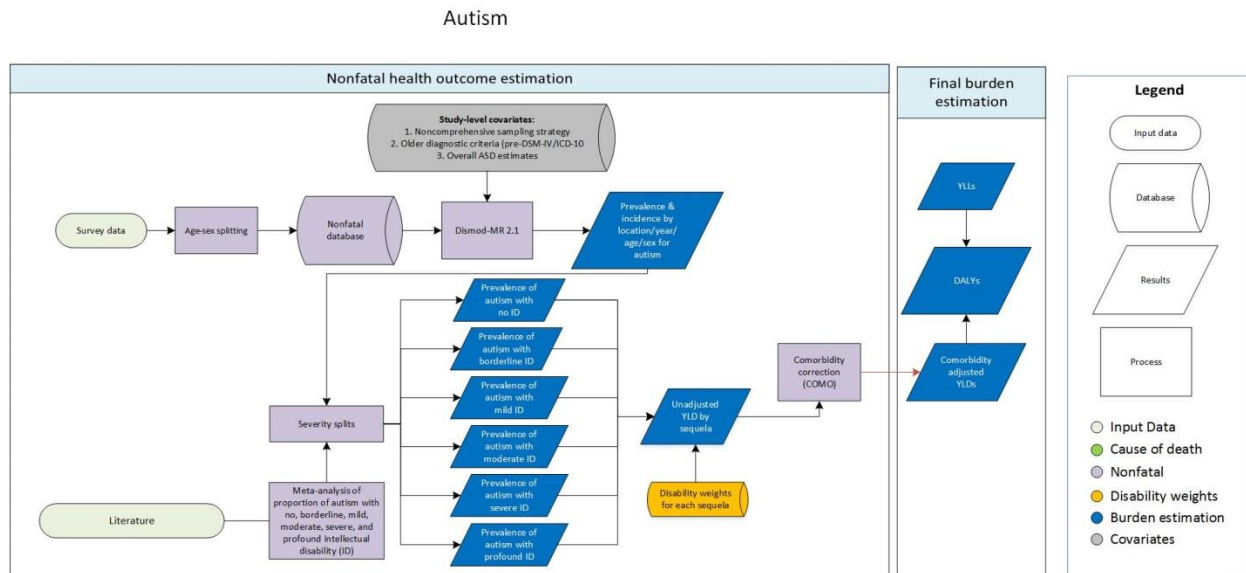

## Case definition

Autism (also known as autistic disorder or childhood autism) is an autistic spectrum disorder (ASD) with onset occurring in early childhood. It is characterized by severe and pervasive impairment in several areas of development, including social interaction and communication skills, along with restricted and repetitive patterns of behaviors and/or interests. As per criteria set by the Diagnostic and Statistical Manual of Mental Disorders fourth edition, text revision (DSM-IV-TR),<sup>1</sup> diagnosis requires a total of six (or more) symptoms, with at least two symptoms of qualitative impairment in social interaction and at least one symptom of both qualitative impairment in communication and restricted, repetitive, stereotyped behavior. The recognized symptoms include:

### *Qualitative impairment in social interaction*

- marked impairment in the use of multiple nonverbal behaviors such as eye-to-eye gaze, facial expression, body postures, and gestures to regulate social interaction
- failure to develop peer relationships appropriate to developmental level
- a lack of spontaneous seeking to share enjoyment, interests, or achievements with other people
- lack of social or emotional reciprocity

### *Qualitative impairments in communication*

- delay in, or total lack of, the development of spoken language (not accompanied by an attempt to compensate through alternative modes of communication such as gesture)
- in individuals with adequate speech, marked impairment in the ability to initiate or sustain a conversation with others
- stereotyped and repetitive use of language or idiosyncratic language
- lack of varied, spontaneous make-believe play or social imitative play appropriate to developmental level

*Restricted repetitive and stereotyped patterns of behavior, interests, and activities*

- a) encompassing preoccupation with one or more stereotyped and restricted patterns of interest that is abnormal either in intensity or focus
- b) apparently inflexible adherence to specific, nonfunctional routines or rituals
- c) stereotyped and repetitive motor mannerisms
- d) persistent preoccupation with parts of objects

Delays or abnormal functioning with onset prior to three years of age in at social interaction, language interaction, or symbolic or imaginative play is also required. Included in GBD were cases meeting diagnostic criteria according to DSM<sup>1</sup> or the International Classification of Diseases (ICD).<sup>2</sup> These were identified by the following codes: 299.00 (DSM-IV-TR) and F84 (ICD-10). Different versions of DSM (DSM-III, DSM-III-R, DSM-IV, DSM-IV-TR, and DSM-5) and ICD (ICD-9 and ICD-10) were accepted.

## Input data

### Model inputs

A series of systematic literature reviews were conducted to capture studies reporting the prevalence, incidence, remission, and excess mortality of autism. The reviews incorporated searches of peer-reviewed literature via electronic databases, investigations of grey literature, and consultation with experts. In order for a study to be included, it must have been published during or after 1980, use DSM or ICD criteria to define cases, provide sufficient details on study methodology and sample characteristics to determine study quality, and be representative of the general population rather than a special population eg, prison inmates. No limitation was set on the language of publication. Detailed descriptions of this methodology have been published elsewhere.<sup>3</sup> This methodology was utilized in GBD 2010, GBD 2013, and GBD 2016.

Prevalence estimates were split by age and sex where possible outside of DisMod-MR 2.1. Firstly if studies reported prevalence for broad age groups by sex (eg, prevalence in 15 to 65 year old males and females separately), and also by specific age groups but for both sexes combined (eg, prevalence in 15 to 30 year olds, then in 31 to 65 year olds, for males and females combined); age-specific estimates were split by sex using the reported sex ratio and bounds of uncertainty. Secondly, where studies reported estimates across age groups spanning 20 years or more, these were split into five-year age groups using the regional prevalence age pattern estimated by DisMod-MR 2.1.

The final dataset for GBD 2016 included 174 prevalence estimates, 24 incidence estimates, 5 remission estimates, and 11 standardized mortality ratio estimates. The table below shows the number of studies for each parameter as well as the number of countries/subnationals and GBD world regions covered by the available data.

|                        | Prevalence | Incidence | Remission | Mortality |
|------------------------|------------|-----------|-----------|-----------|
| Studies                | 67         | 3         | 5         | 3         |
| Countries/subnationals | 50         | 3         | 4         | 3         |
| GBD world regions      | 10         | 3         | 2         | 2         |

### Severity split inputs

Autism is one of the causes that contributes to the intellectual disability (ID) envelope. As such, a gradation of autism by level of severity was needed. Meta-analyses were conducted using data from six studies reporting information on the IQ level in those with autism in order to calculate the severity splits

by six sequelae: autism with 1) no ID, 2) borderline ID, 3) mild ID, 4) moderate ID, 5) severe ID, and 6) profound ID. The lay descriptions and disability weights for autism and each level of intellectual disability are shown in the table below.

| Health state   | Lay description                                                                                                                                                                                                                           | DW (95% CI)         |
|----------------|-------------------------------------------------------------------------------------------------------------------------------------------------------------------------------------------------------------------------------------------|---------------------|
| Autism         | Has severe problems interacting with others and difficulty understanding simple questions or directions. The person has great difficulty with basic daily activities and becomes distressed by any change in routine.                     | 0.262 (0.176–0.365) |
| ID, borderline | Is slow in learning at school. As an adult, the person has some difficulty doing complex or unfamiliar tasks but otherwise functions independently.                                                                                       | 0.011 (0.005–0.024) |
| ID, mild       | Has low intelligence and is slow in learning at school. As an adult, the person can live independently, but often needs help to raise children and can only work at simple supervised jobs.                                               | 0.043 (0.028–0.067) |
| ID, moderate   | Has low intelligence, and is slow in learning to speak and to do even simple tasks. As an adult, the person requires a lot of support to live independently and raise children. The person can only work at the simplest supervised jobs. | 0.098 (0.064–0.142) |
| ID, severe     | Has very low intelligence and cannot speak more than a few words, needs constant supervision and help with most daily activities, and can do only the simplest tasks.                                                                     | 0.157 (0.104–0.219) |
| ID, profound   | Has very low intelligence, has almost no language, and does not understand even the most basic requests or instructions. The person requires constant supervision and help for all activities.                                            | 0.196 (0.126–0.272) |

## Modelling strategy

We assumed no incidence from 15 years of age onward. A small setting was placed on excess mortality whereby only minimal excess mortality was allowed over the lifespan. Remission was set to 0 after expert consultation revealed we would not expect remission for autism. Settings for excess mortality and remission differ from settings used in GBD 2015 where excess mortality was originally set to 0 and a small setting was placed on remission whereby only minimal remission was allowed over the lifespan. The mortality data in the autism dataset consist of standardized mortality ratio estimates from high-income locations. DisMod MR 2.1 produced good global fit for these data; however, the region fit did not follow the data, leading to high estimates of standardised mortality ratio in high-income countries and low estimates of standardised mortality ratio in low- and middle-income countries. Excess mortality estimates by age, sex, and year were therefore calculated by pulling global estimates of standardised mortality ratio from DisMod MR 2.1 and applying the following formula:

$$\text{excess mortality rate} = (\text{standardized mortality ratio} - 1) \times \text{all cause mortality rate}$$

Three study-level covariates were applied which: 1) adjusted estimates using a limited sampling strategy towards those using comprehensive sampling strategies (eg, those including private households and mainstream schools as well as healthcare and remedial therapy facilities), and 2) adjusted estimates based on older diagnostic criteria (prior to DSM-IV and ICD-10) toward estimates made using more

current criteria, and 3) adjusted estimates of ASD overall (ie, studies that did not report on the individual disorders) toward estimates representing autism. The third covariate is an addition in GBD 2016.

| Study covariate                                                             | Parameter  | beta                  | Exponentiated beta |
|-----------------------------------------------------------------------------|------------|-----------------------|--------------------|
| Non-comprehensive sampling strategy                                         | Prevalence | -0.32 (-0.6 – -0.041) | 0.73 (0.55–0.96)   |
| Identifies data classified by older criteria (ie, before DSM-IV and ICD-10) | Prevalence | -0.54 (-0.9 – -0.18)  | 0.58 (0.41–0.83)   |
| Overall ASD estimates                                                       | Prevalence | 1.25 (0.9–1.60)       | 3.47 (2.45–4.94)   |

## References

1. American Psychiatric Association. Diagnostic and Statistical Manual of Mental Disorders (DSM-IV-TR). 4th, Text Revision ed. Washington DC: American Psychiatric Association; 2000.
2. World Health Organisation. ICD-10 Classification of Mental and Behavioural Disorders: Clinical descriptions and diagnostic guidelines. Geneva: World Health Organisation; 1992.
3. Baxter AJ, Brugha TS, Erskine HE, Scheurer RW, Vos T, Scott JG. The epidemiology and global burden of autism spectrum disorders. *Psychological Medicine* 2014; **45**(3): 601-13.



# Asperger's syndrome & other autistic spectrum disorders

## Flowchart

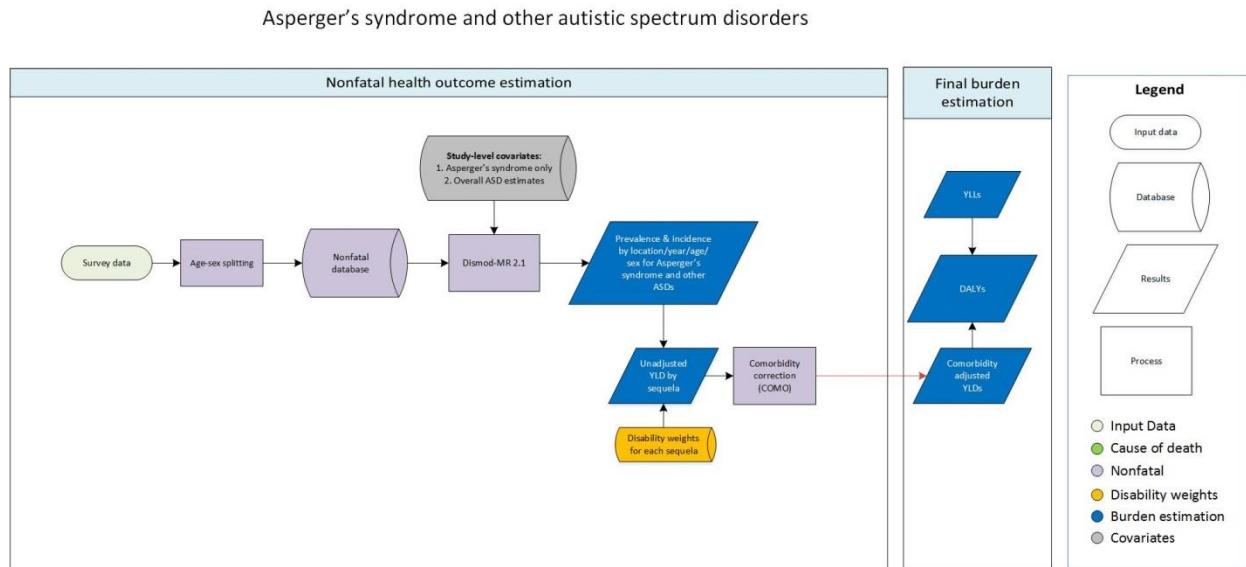

## Case definition

Asperger's syndrome is an autistic spectrum disorder (ASD) characterized by severe and sustained impairment in social interaction skills along with restricted and repetitive patterns of behavior or interests. As per criteria set by the Diagnostic and Statistical Manual of Mental Disorders fourth edition, text revision (DSM-IV-TR),<sup>1</sup> diagnosis requires at least two symptoms of qualitative impairment in social interaction and at least one symptom of restricted, repetitive, stereotyped behavior. The recognized symptoms include:

### *Qualitative impairment in social interaction*

- e) marked impairment in the use of multiple nonverbal behaviors such as eye-to-eye gaze, facial expression, body postures, and gestures to regulate social interaction
- f) failure to develop peer relationships appropriate to developmental level
- g) a lack of spontaneous seeking to share enjoyment, interests, or achievements with other people
- h) lack of social or emotional reciprocity

### *Restricted repetitive and stereotyped patterns of behavior, interests, and activities*

- e) encompassing preoccupation with one or more stereotyped and restricted patterns of interest that is abnormal either in intensity or focus
- f) apparently inflexible adherence to specific, nonfunctional routines or rituals
- g) stereotyped and repetitive motor mannerisms
- h) persistent preoccupation with parts of objects

Unlike autism, there is no clinically significant delay in language acquisition or cognitive development. Included in GBD were cases meeting diagnostic criteria according to DSM<sup>1</sup> or the International

Classification of Diseases (ICD).<sup>2</sup> These were identified by the following codes: 299.8 (DSM-IV-TR) and F84.5 (ICD-10). Different versions of DSM (DSM-III, DSM-III-R, DSM-IV, DSM-IV-TR, and DSM-5) and ICD (ICD-9 and ICD-10) were accepted. Estimates of other ASDs were also included such as Rett’s disorder (DSM-IV-TR: 299.8, ICD-10: F84.2), childhood disintegrative disorder (DSM-IV-TR: 299.1, ICD-10: F84.3), atypical autism (ICD-10: F84.1), overactive disorder associated with mental retardation and stereotyped movements (ICD-10: F84.4), and pervasive disorder not otherwise specified (DSM-IV-TR: 299.8, ICD-10: F84.8-F84.9).

## Input data

### *Model inputs*

A series of systematic literature reviews were conducted to capture studies reporting the prevalence, incidence, remission, and excess mortality of Asperger’s syndrome and other ASDs. The reviews incorporated searches of peer-reviewed literature via electronic databases, investigations of grey literature, and consultation with experts. In order for a study to be included, it must have been published during or after 1980, use DSM or ICD criteria to define cases, provide sufficient details on study methodology and sample characteristics to determine study quality, and be representative of the general population rather than a special population, eg, prison inmates. No limitation was set on the language of publication. Detailed descriptions of this methodology have been published elsewhere.<sup>3</sup> This methodology was utilized in GBD 2010, GBD 2013, and GBD 2016.

Prevalence estimates were split by age and sex where possible outside of DisMod-MR 2.1. Firstly if studies reported prevalence for broad age groups by sex (eg, prevalence in 15 to 65 year old males and females separately), and also by specific age groups but for both sexes combined (eg, prevalence in 15 to 30 year olds, then in 31 to 65 year olds, for males and females combined); age-specific estimates were split by sex using the reported sex ratio and bounds of uncertainty. Secondly, where studies reported estimates across age groups spanning 20 years or more, these were split into five-year age groups using the regional prevalence age pattern estimated by DisMod-MR 2.1.

The final dataset for GBD 2016 included 83 prevalence estimates, 14 incidence estimates, 2 remission estimates, and 1 excess mortality estimate. The table below shows the number of studies for each parameter as well as the number of countries/subnationals and GBD world regions covered by the available data.

|                        | Prevalence | Incidence | Remission | Mortality |
|------------------------|------------|-----------|-----------|-----------|
| Studies                | 32         | 2         | 2         | 1         |
| Countries/subnationals | 32         | 2         | 2         | 1         |
| GBD world regions      | 8          | 2         | 1         | 1         |

### *Disability weight*

No severity splits were applied to autism. The lay description and disability weight for autism are shown in the table below.

| Lay description                                                                                                     | DW (95% CI)         |
|---------------------------------------------------------------------------------------------------------------------|---------------------|
| Has difficulty interacting with other people and is slow to understand or respond to questions. The person is often | 0.104 (0.071–0.147) |

|                                                                                 |  |
|---------------------------------------------------------------------------------|--|
| preoccupied with one thing and has some difficulty with basic daily activities. |  |
|---------------------------------------------------------------------------------|--|

## Modelling strategy

We assumed no incidence from 15 years of age onward. This was changed from GBD 2015 where no incidence was assumed from 20 years of age onward. A small setting was placed on remission whereby only minimal remission was allowed over the lifespan. Excess mortality was set to 0 given the limited data demonstrating an association between Asperger’s syndrome and other ASDs and an increased risk of death. Only one study reported the excess mortality associated with Asperger’s syndrome and other ASDs and found no significantly increased risk of death. Two study-level covariates were applied. The first adjusted estimates of Asperger’s syndrome only toward those including both Asperger’s syndrome and other ASDs. The second adjusted estimates of ASD overall (ie, studies that did not report on the individual disorders) toward estimates representing Asperger’s syndrome and other ASDs. This approach was largely consistent with that of GBD 2015 with the exception of the addition of the latter covariate and the earlier age in which we assume no incidence onward.

| Study covariate          | Parameter  | beta                   | Exponentiated beta |
|--------------------------|------------|------------------------|--------------------|
| Asperger’s syndrome only | Prevalence | -0.39 (-0.88 – -0.034) | 0.67 (0.42–0.97)   |
| Overall ASD estimates    | Prevalence | 0.97 (0.53–1.17)       | 2.65 (1.84–3.67)   |

## References

1. American Psychiatric Association. Diagnostic and Statistical Manual of Mental Disorders (DSM-IV-TR). 4th, Text Revision ed. Washington DC: American Psychiatric Association; 2000.
2. World Health Organisation. ICD-10 Classification of Mental and Behavioural Disorders: Clinical descriptions and diagnostic guidelines. Geneva: World Health Organisation; 1992.
3. Baxter AJ, Brugha TS, Erskine HE, Scheurer RW, Vos T, Scott JG. The epidemiology and global burden of autism spectrum disorders. *Psychological Medicine* 2014; **45**(3): 601-13.

# Attention-deficit/hyperactivity disorder (ADHD)

## Flowchart

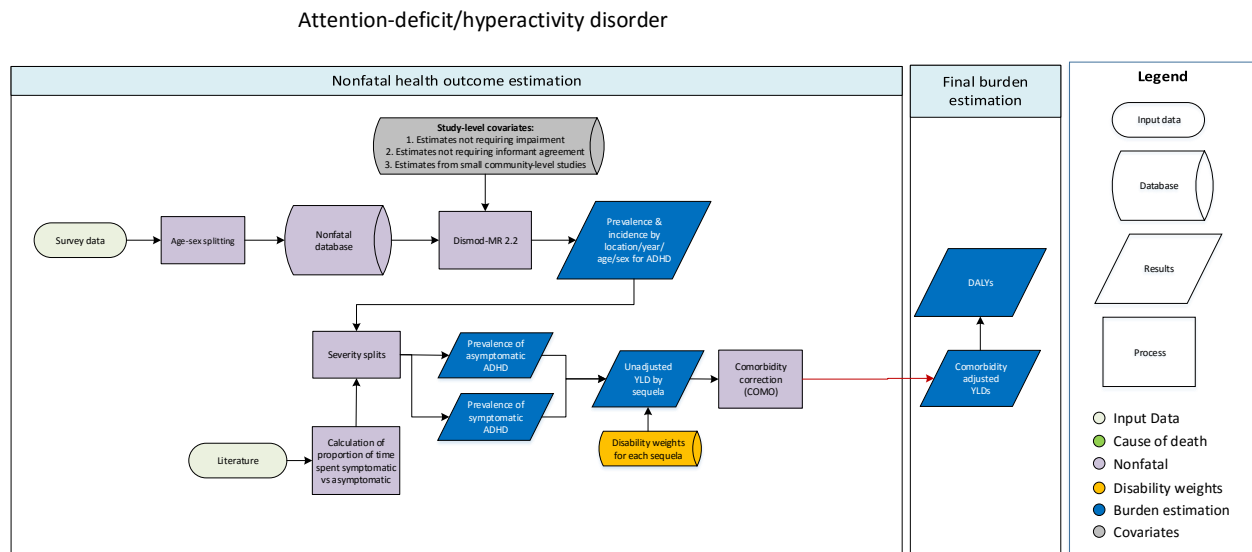

## Case definition

Attention-deficit/hyperactivity disorder (ADHD) is an externalizing behavior disorder characterized by persistent inattention and/or hyperactivity-impulsivity. As per criteria set by the Diagnostic and Statistical Manual of Mental Disorders fourth edition, text revision (DSM-IV-TR)<sup>1</sup>, diagnosis requires six or more symptoms of inattention or hyperactivity-impulsivity to have persisted for at least six months in two or more settings causing significant impairment to functioning, with at least some impairing symptoms being present prior to 7 years of age (12 years of age in DSM-5<sup>2</sup>). Recognized symptoms include:

### Inattention:

- often fails to give close attention to details or makes careless mistakes in schoolwork, work, or other activities
- often has difficulty sustaining attention in tasks or play activities
- often does not seem to listen when spoken to directly
- often does not follow through on instructions and fails to finish school work, chores, or duties in the workplace (not due to oppositional behavior or failure to understand instructions)
- often has difficulty organizing tasks and activities
- often avoids, dislikes, or is reluctant to engage in tasks that require sustained mental effort (such as schoolwork or homework)
- often loses things necessary for tasks or activities (eg, toys, school assignments, pencils, books, or tools)
- is often easily distracted by extraneous stimuli
- is often forgetful in daily activities

### Hyperactivity

- often fidgets with hands or feet or squirms in seat
- often leaves seat in classroom or in other situations in which remaining seated is expected
- often runs about or climbs excessively in situations in which it is inappropriate (in adolescents or adults, may be limited to subjective feelings of restlessness)
- often has difficulty playing or engaging in leisure activities quietly
- is often “on the go” or often acts as if “driven by a motor”
- often talks excessively

#### *Impulsivity*

- often blurts out answers before questions have been completed
- often has difficulty awaiting turn
- often interrupts or intrudes on others (eg, butts into conversations or games)

Included in GBD were cases meeting diagnostic criteria according to DSM<sup>1</sup> or the International Classification of Diseases (ICD)<sup>3</sup> (called “hyperkinetic disorder” in ICD). These were identified by the following codes: 314.0, 314.01 (DSM-IV-TR) and F90 (ICD-10). Different versions of DSM (DSM-III, DSM-III-R, DSM-IV, DSM-IV-TR, and DSM-5) and ICD (ICD-9 and ICD-10) were accepted.

## Input data

### *Model inputs*

A series of systematic literature reviews were conducted to capture studies reporting the prevalence, incidence, remission, and excess mortality of ADHD. The reviews incorporated searches of peer-reviewed literature via electronic databases, investigations of grey literature, and consultation with experts. In order for a study to be included, it must have been published during or after 1980, use DSM or ICD criteria to define cases, provide sufficient details on study methodology and sample characteristics to determine study quality, and be representative of the general population rather than a special population, eg, prison inmates. No limitation was set on the language of publication. Detailed descriptions of this methodology have been published elsewhere.<sup>4</sup> This methodology was utilized in GBD 2010 and GBD 2013. GBD 2015 included additional sources identified by GBD experts and microdata where available. The systematic review methodology used in GBD 2010 and 2013 was replicated to update the dataset for GBD 2016.

The final dataset for GBD 2016 included 290 prevalence estimates, five incidence estimates, 20 remission estimates, and three excess mortality estimates. The table below shows the number of studies for each parameter as well as the number of countries/subnationals and GBD world regions covered by the available data.

|                        | Prevalence | Incidence | Remission | Mortality |
|------------------------|------------|-----------|-----------|-----------|
| Studies                | 130        | 2         | 14        | 2         |
| Countries/subnationals | 77         | 2         | 12        | 2         |
| GBD world regions      | 17         | 1         | 3         | 2         |

Reported estimates of prevalence were split by age and sex where possible. If studies reported prevalence for broad age groups by sex (eg, prevalence in 5-18 year old males and females separately) and by specific age groups but for both sexes combined (eg, prevalence for 5-12 year olds and 13-18 year olds, for males and females combined), age-specific estimates were split by sex using the reported sex

ratio and bounds of uncertainty. Also, where studies reported estimates across age groups spanning 20 years or more, these were split into five-year age groups using the prevalence age pattern estimated by DisMod-MR 2.1.

*Severity split inputs*

A severity split for the proportion of time spent symptomatic versus asymptomatic was based on data from the Great Smoky Mountains Study which assessed the levels of disability found in children and adolescents with mental disorders.<sup>5</sup> Of those with ADHD, 48% reported disability while 20% of individuals with no diagnosis reported disability at the time of survey. Using these as estimates of the proportion of time with disability in the “average case,” the proportion of disability in children without a diagnosis was subtracted from the proportion with disability for ADHD, giving an adjusted proportion of 28%. Detailed descriptions of this methodology have been published elsewhere.<sup>6</sup> The lay description and disability weight for ADHD is shown in the table below.

|                                                                                           |                     |
|-------------------------------------------------------------------------------------------|---------------------|
| Lay description                                                                           | DW (95% CI)         |
| Is hyperactive and has difficulty concentrating, remembering things, and completing tasks | 0.045 (0.028–0.066) |

**Modelling strategy**

We assumed no incidence prior to 3 years of age or onward from 12 years of age. The minimum age of onset was set in consultation with experts and based on current literature, while the upper age limit on incidence was set in line with the latest DSM-5 criteria. Remission was set to zero prior to 12 years, in line with the restriction on incidence. Excess mortality was set to zero given only three estimates were found for this parameter. Three covariates were included in the model. The first covariate was an informant covariate which adjusted estimates not requiring agreement between informants (eg, diagnosis made if either a teacher or parent indicates ADHD) toward estimates which required informant agreement. The second covariate adjusted estimates not requiring impairment (or those not specifying whether impairment was required) for diagnosis toward those which required impairment. The third covariate adjusted studies using small, community samples toward studies representative of entire regions or countries. Bounds for these covariates were calculated from the epidemiological data and applied in DisMod-MR 2.1.

| Study covariate                | Parameter  | beta                | Exponentiated beta |
|--------------------------------|------------|---------------------|--------------------|
| No informant agreement         | Prevalence | 0.53 (0.45–0.72)    | 1.71 (1.57–2.05)   |
| No impairment                  | Prevalence | 0.068 (0.0043–0.21) | 1.07 (1.00–1.24)   |
| Small, community-level studies | Prevalence | 0.53 (0.31–0.75)    | 1.69 (1.36–2.12)   |

**References**

1. American Psychiatric Association. Diagnostic and Statistical Manual of Mental Disorders (DSM-IV-TR). 4th, Text Revision ed. Washington DC: American Psychiatric Association; 2000.
2. American Psychiatric Association. Diagnostic and Statistical Manual of Mental Disorders, Fifth Edition. Arlington, VA: American Psychiatric Association; 2013.

3. World Health Organisation. ICD-10 Classification of Mental and Behavioural Disorders: Clinical descriptions and diagnostic guidelines. Geneva: World Health Organisation; 1992.
4. Erskine HE, Ferrari AJ, Nelson P, et al. Research Review: Epidemiological modelling of attention-deficit/hyperactivity disorder and conduct disorder for the Global Burden of Disease Study 2010. *Journal of Child Psychology and Psychiatry* 2013; **54**(12): 1263-74.
5. Ezpeleta L, Keeler G, Erkanli A, Costello EJ, Angold A. Epidemiology of Psychiatric Disability in Childhood and Adolescence. *J Child Psychol Psychiatry* 2001; **42**(7): 901-14.
6. Erskine HE, Ferrari AJ, Polanczyk GV, et al. The global burden of conduct disorder and attention-deficit/hyperactivity disorder in 2010. *J Child Psychol Psychiatry* 2014; **55**(4): 328-36.

# Conduct Disorder

## Flowchart

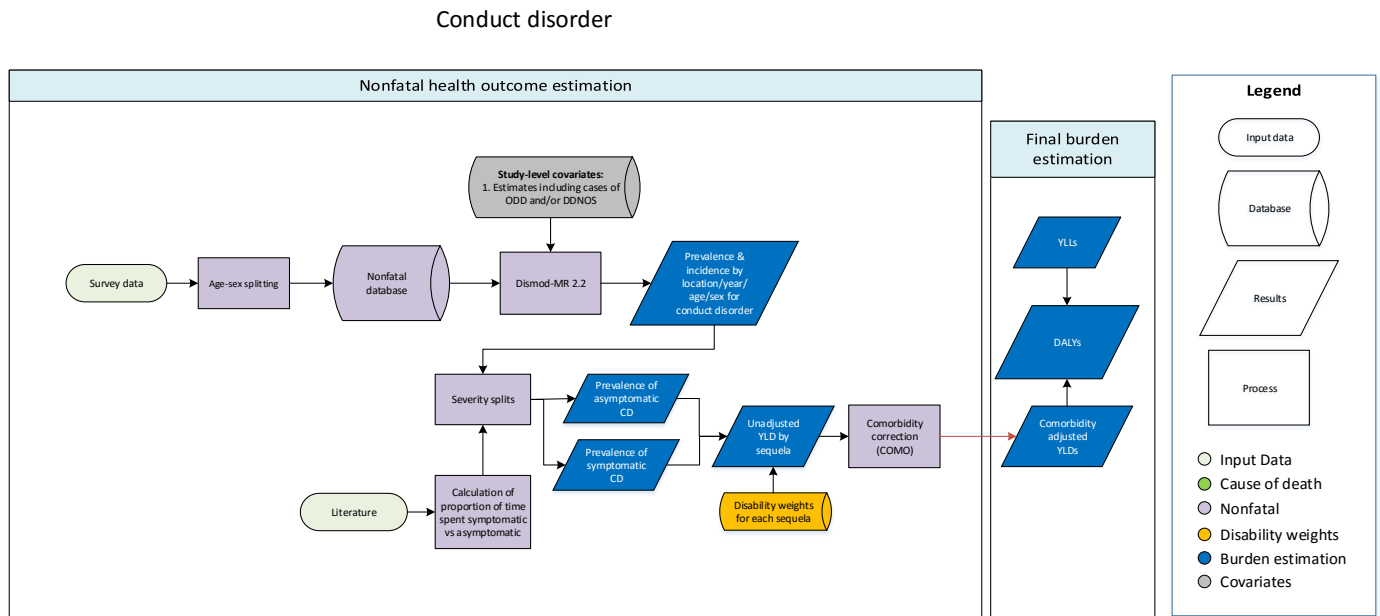

## Case definition

Conduct disorder (CD) is an externalizing behavior disorder characterized by a pattern of antisocial behavior that violates the basic rights of others or major age-appropriate societal norms. As per criteria set by the Diagnostic and Statistical Manual of Mental Disorders fourth edition, text revision (DSM-IV-TR),<sup>1</sup> diagnosis requires three or more of the following symptoms to be present in the past 12 months (with at least one present in the last six months) and cause significant impairment in functioning. Symptoms include:

### *Aggression to people and animals*

- often bullies, threatens, or intimidates others
- often initiates physical fights
- has used a weapon that can cause serious physical harm to others (eg, a bat, brick, broken bottle, knife, gun)
- has been physically cruel to people
- has been physically cruel to animals
- has stolen while confronting a victim (eg, mugging, purse snatching, extortion, armed robbery)
- has forced someone into sexual activity

### *Destruction of property*

- has deliberately engaged in fire setting with the intention of causing serious damage
- has deliberately destroyed others' property (other than by fire setting)

### *Deceitfulness or theft*



- has broken into someone else’s house, building, or car
- often lies to obtain goods or favors or to avoid obligations (ie, “cons” others)
- has stolen items of nontrivial value without confronting a victim (eg, shoplifting, but without breaking and entering; forgery)

*Serious violations of rules*

- often stays out at night despite parental prohibitions, beginning before age 13 years
- has run away from home overnight at least twice while living in parental or parental surrogate home (or once without returning for a lengthy period)
- is often truant from school, beginning before age 13 years

CD is considered a disorder of childhood but can be diagnosed in adults who display such behaviors yet do not meet the criteria for antisocial personality disorder. However, there are almost no studies measuring adult CD as existing studies in this area tend to measure adult antisocial behavior rather than adult CD.<sup>2</sup> As such, only childhood CD (ie, cases prior to 18 years of age) was modeled in GBD.

Included in GBD were cases meeting diagnostic criteria according to DSM<sup>1</sup> or the International Classification of Diseases (ICD).<sup>3</sup> These were identified by the following codes: 312 (DSM-IV-TR) and F91 (ICD-10). Different versions of DSM (DSM-III, DSM-III-R, DSM-IV, DSM-IV-TR, and DSM-5) and ICD (ICD-9 and ICD-10) were accepted. Estimates also including oppositional defiant disorder (ODD; DSM-IV-TR: 313.81, ICD-10: F91.3) or disruptive behavior disorder not otherwise specified (DDNOS, DSM-IV-TR: 312.9, ICD-10: 91.9) were accepted and adjusted with a covariate during the modelling process.

**Input data**

*Model inputs*

A series of systematic literature reviews were conducted to capture studies reporting the prevalence, incidence, remission, and excess mortality of CD. The reviews incorporated searches of peer-reviewed literature via electronic databases, investigations of grey literature, and consultation with experts. In order for a study to be included, it must have been published during or after 1980, use DSM or ICD criteria to define cases, provide sufficient details on study methodology and sample characteristics to determine study quality, and be representative of the general population rather than a special population, eg, prison inmates. No limitation was set on the language of publication. Detailed descriptions of this methodology have been published elsewhere.<sup>2</sup> This methodology was utilized in GBD 2010 and GBD 2013. GBD 2015 included additional sources identified by GBD experts and microdata where available. The systematic review methodology used in GBD 2010 and 2013 was replicated to update the dataset for GBD 2016.

The final dataset for GBD 2016 included 164 prevalence estimates, 12 incidence estimates, and 11 remission estimates. No estimates of excess mortality were found for CD. The table below shows the number of studies for each parameter as well as the number of countries/subnationals and GBD world regions covered by the available data.

|                        | Prevalence | Incidence | Remission | Mortality |
|------------------------|------------|-----------|-----------|-----------|
| Studies                | 63         | 4         | 5         | 0         |
| Countries/subnationals | 50         | 4         | 6         | 0         |

|                   |    |   |   |   |
|-------------------|----|---|---|---|
| GBD world regions | 15 | 2 | 2 | 0 |
|-------------------|----|---|---|---|

Reported estimates of prevalence were split by age and sex where possible. If studies reported prevalence for broad age groups by sex (eg, prevalence in 5-18 year old males and females separately) and by specific age groups but for both sexes combined (eg, prevalence for 5-12 year olds and 13-18 year olds, for males and females combined), age-specific estimates were split by sex using the reported sex ratio and bounds of uncertainty.

#### *Severity split inputs*

A severity split for the proportion of time spent symptomatic versus asymptomatic was based on data from the Great Smoky Mountains Study which assessed the levels of disability found in children and adolescents with mental disorders.<sup>4</sup> Of those with CD, 72% reported disability while 20% of individuals with no diagnosis reported disability at the time of survey. Using these as estimates of the proportion of time with disability in the “average case,” the proportion of disability in children without a diagnosis was subtracted from the proportion with disability for CD, giving an adjusted proportion of 52%. Detailed descriptions of this methodology have been published elsewhere.<sup>5</sup> The lay description and disability weight for CD is shown in the table below.

| Lay description                                                                                                                                | DW (95% CI)         |
|------------------------------------------------------------------------------------------------------------------------------------------------|---------------------|
| Has frequent behavior problems, which are sometimes violent. The person often has difficulty interacting with other people and feels irritable | 0.241 (0.159–0.341) |

### Modelling strategy

We assumed no incidence or prevalence prior to 5 years of age or after 18 years of age. The minimum age of onset was set in consultation with experts while the upper age limit was set in line with DSM criteria. Excess mortality was set to zero given the absence of data demonstrating an association between CD and an increased risk of death. Remission and incidence were capped between ages 4 and 17 years in order to gain more plausible output. A covariate was used to adjust any prevalence estimates which also included cases of oppositional defiant disorder and/or disruptive behavior disorder not otherwise specified towards those including CD only.

| Covariate                                                 | Parameter  | beta               | Exponentiated beta |
|-----------------------------------------------------------|------------|--------------------|--------------------|
| Identifies estimates also containing ODD &/or DDNOS cases | Prevalence | 0.65 (0.41 — 0.89) | 1.91 (1.51 — 2.43) |

### References

1. American Psychiatric Association. Diagnostic and Statistical Manual of Mental Disorders (DSM-IV-TR). 4th, Text Revision ed. Washington DC: American Psychiatric Association; 2000.
2. Erskine HE, Ferrari AJ, Nelson P, et al. Research Review: Epidemiological modelling of attention-deficit/hyperactivity disorder and conduct disorder for the Global Burden of Disease Study 2010. *Journal of Child Psychology and Psychiatry* 2013; **54**(12): 1263-74.

3. World Health Organisation. ICD-10 Classification of Mental and Behavioural Disorders: Clinical descriptions and diagnostic guidelines. Geneva: World Health Organisation; 1992.
4. Ezpeleta L, Keeler G, Erkanli A, Costello EJ, Angold A. Epidemiology of Psychiatric Disability in Childhood and Adolescence. *J Child Psychol Psychiatry* 2001; **42**(7): 901-14.
5. Erskine HE, Ferrari AJ, Polanczyk GV, et al. The global burden of conduct disorder and attention-deficit/hyperactivity disorder in 2010. *Journal of Child Psychology and Psychiatry* 2014; **55**(4): 328-36.

## Other mental disorders

### Flow chart

#### Other mental disorders: Personality disorders

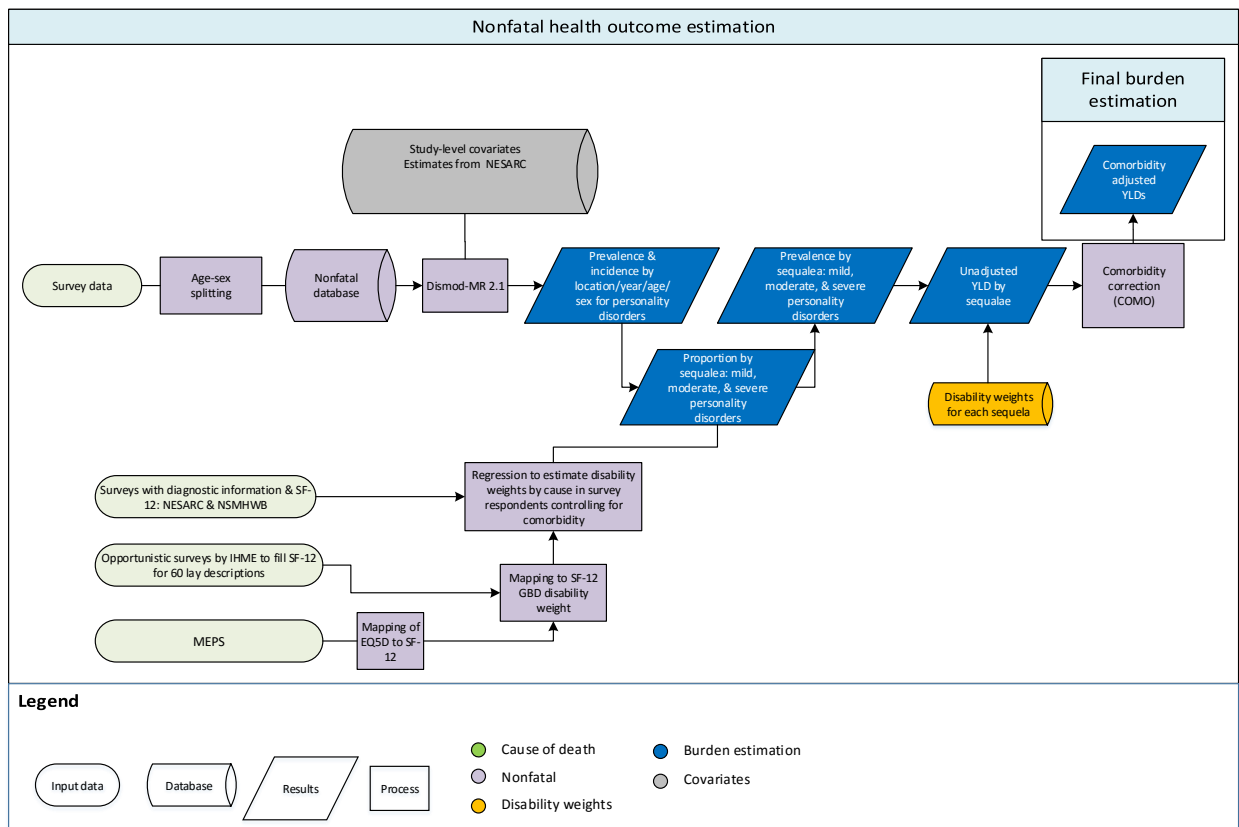

### Case Definition

In addition to the individual mental disorders for which we estimate burden, we also estimate the non-fatal burden attributable to a residual cause of “other mental disorders.” This is made up of an aggregate group of personality disorders. Personality disorders are characterized by pervasive, inflexible and maladaptive patterns of behaviour and inner experience which are markedly different from what is considered to be acceptable in the individual’s culture. These disorders tend to be chronic and are associated with significant distress or disability. Included in GBD 2016 were cases meeting diagnostic criteria for personality disorders according to the Diagnostic and Statistical Manual of Mental Disorders (DSM), or the equivalent diagnosis in the International Classification of Diseases (ICD).<sup>1,2</sup> The aggregated group of personality disorders used in GBD 2016 captured any of the following;

- Paranoid personality disorder
- Schizoid personality disorder

- Schizotypal personality disorder
- Antisocial personality disorder
- Borderline personality disorder
- Histrionic personality disorder
- Narcissistic personality disorder
- Avoidant personality disorder
- Dependent personality disorder
- Obsessive-compulsive personality disorder
- Personality disorder not otherwise specified

## Input data

### *Model inputs*

Prevalence estimates for the above personality disorders were obtained from the US National Epidemiological Survey on Alcohol and Related Conditions (NESARC, conducted in two waves from 2001–2002 and 2004–2005)<sup>3</sup> and the Australian National Survey of Mental Health and Wellbeing of Adults (NSMHWB, conducted in 1997).<sup>4</sup> Given that personality disorders often co-occur with other mental and substance use disorders, an adjustment for comorbidity is important so as not to overestimate the overall burden attributable to mental and substance use disorders. Participants meeting criteria for any type of personality disorders from the NESARC and NSMHWB surveys were counted as a prevalent case only if they did not simultaneously meet criteria for another mental and substance use disorder featured in GBD 2016.

### *Severity splits*

The basis of the GBD disability weight survey assessments are lay descriptions of sequelae highlighting major functional consequences and symptoms. The lay descriptions and disability weights applied to the personality disorders within this residual group are shown below and were those estimated for anxiety disorders.

| Severity level | Lay description                                                                                                                                                                  | DW (95% CI)         |
|----------------|----------------------------------------------------------------------------------------------------------------------------------------------------------------------------------|---------------------|
| Mild           | Feels mildly anxious and worried, which makes it slightly difficult to concentrate, remember things, and sleep. The person tires easily but is able to perform daily activities. | 0.03 (0.018–0.046)  |
| Moderate       | Feels anxious and worried, which makes it difficult to concentrate, remember things, and sleep. The person tires easily and finds it difficult to perform daily activities.      | 0.133 (0.091–0.186) |
| Severe         | Constantly feels very anxious and worried, which makes it difficult to concentrate, remember things, and sleep. The person has lost pleasure in life and thinks about suicide.   | 0.523 (0.362–0.677) |

To determine the proportion of people with personality disorders within each of the severity levels, the NSMHWB survey was used to estimate the proportion of cases asymptomatic (30%, 28%–32%), mild (41%, 33%–47%), moderate (15%, 11%–20%) and severe (14%, 10%–18%).

## Modelling Strategy

The GBD 2016 epidemiological modelling strategy made use of DisMod-MR 2.1. As we only had prevalence data available, a number of expert priors were used in order to run a full-parameter model. We assumed no incidence and prevalence before age 14. This minimum age of onset was corroborated with expert feedback and DSM criteria highlighting the fact that personality disorders typically become recognizable during adolescence and early adulthood. Remission was set to a maximum of 0.01, given that these are understood to be chronic disorders with little or no complete remission. Excess mortality was set to 0 in this model, in the absence of mortality data required for DisMod-MR 2.1 modelling purposes.

Study-level covariates were used to accommodate for between-study variability in the raw prevalence data. A `cv_NESARC` covariate adjusted all data points derived from NESARC toward the level of data points from estimates from the NSMHWB. The latter survey was made up of a more representative list of personality disorders and produced estimates along the levels of what we would expect for personality disorders. The corresponding beta and exponentiated value (which can be interpreted as an odds ratio) is shown in the table below:

| Study covariate        | Parameter  | beta             | Exponentiated beta |
|------------------------|------------|------------------|--------------------|
| <code>cv_NESARC</code> | Prevalence | 0.67 (0.35–0.96) | 1.95 (1.42–2.60)   |

In this model, global prevalence was exclusively estimated using prevalence estimates from two surveys from the United States and Australia where we had unit record data available to estimate the prevalence of personality disorders, excluding those not simultaneously meeting criteria for another mental or substance use disorder. Given the sparsity of data, we applied a restriction on location random-effects of -0.1 to 0.1 to further guide prevalence estimation. We are currently undertaking a literature review of population-survey data on the epidemiology of personality disorders across low-, middle-, and high-income countries with the aim of providing more robust and globally representative burden estimates for personality disorders in future GBD studies.

## References

1. American Psychiatric Association. Diagnostic and Statistical Manual of Mental Disorders (DSM). Washington: American Psychiatric Association, 1952.
2. World Health Organization. The ICD-10 Classification of Mental and Behavioural Disorders. Clinical descriptions and diagnostic guidelines. Geneva: World Health Organization; 1992.
3. Introduction to the National Epidemiologic Survey on Alcohol and Related Conditions [<http://pubs.niaaa.nih.gov/publications/arh29-2/74-78.htm>]. Access date 1 December 2014.
4. Australian Bureau of Statistics. National Survey of Mental Health and Wellbeing of Adults 1997. Canberra: Australian Bureau of Statistics.

# Diabetes Mellitus

## Flowchart

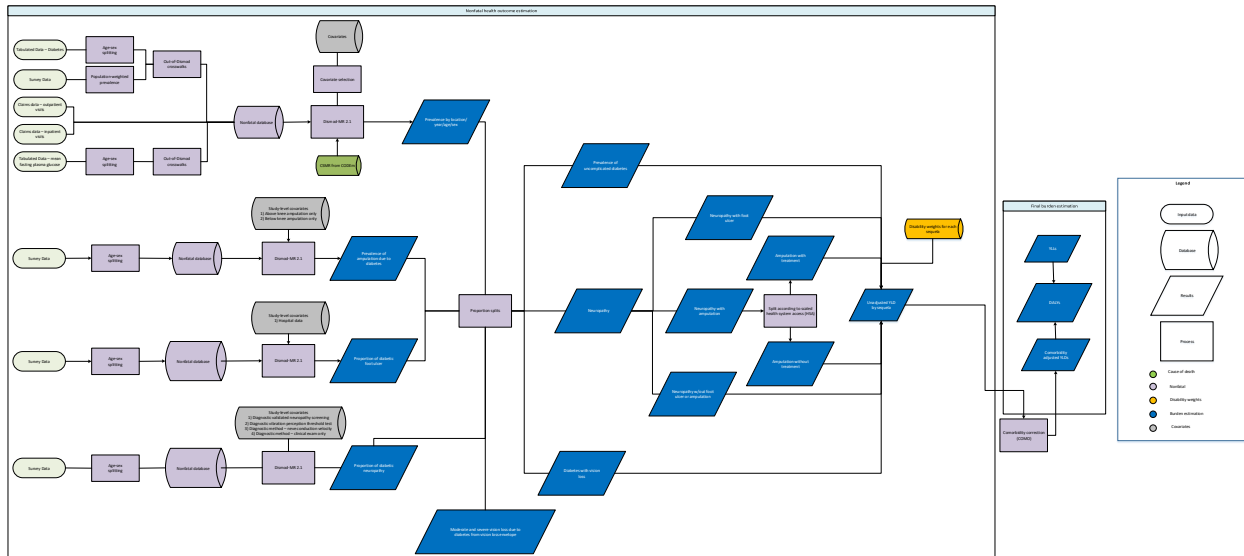

## Case definition

The case definitions and diagnostic criteria are presented in the table below. For full accounting of associated ICD 9 and ICD 10 codes, please refer to **Appendix Table 4**.

| Criterion                                               | Definition                                                                                                                    |
|---------------------------------------------------------|-------------------------------------------------------------------------------------------------------------------------------|
| 1. Diabetes mellitus parent                             | Diabetes mellitus (DM) was defined as fasting plasma glucose (FPG) > 126 mg/dL (7 mmol/L) or being on treatment for diabetes. |
| 2. Uncomplicated diabetes mellitus                      | Cases of DM that do not have any of the following complications: neuropathy, foot ulcer, leg amputation, or vision loss       |
| 3. Diabetic neuropathy                                  | Cases of DM that experience diagnosable neuropathy                                                                            |
| 4. Diabetic foot due to neuropathy                      | Cases of DM that currently have a foot ulcer                                                                                  |
| 5. Diabetic neuropathy and amputation with treatment    | Cases of DM that have had a leg amputation above or below the knee, with treatment consisting of a prosthetic limb            |
| 6. Diabetic neuropathy and amputation without treatment | Cases of DM that have had a leg amputation above or below the knee, with no prosthetic limb                                   |

|                                                        |                                                                        |
|--------------------------------------------------------|------------------------------------------------------------------------|
| 7. Moderate vision impairment due to diabetes mellitus | Cases of DM that have moderate vision loss due to diabetic retinopathy |
| 8. Severe vision impairment due to diabetes mellitus   | Cases of DM that have severe vision loss due to diabetic retinopathy   |
| 9. Blindness due to diabetes mellitus                  | Cases of DM that have blindness due to diabetic retinopathy            |

## Diabetes mellitus parent:

### Data seeking

1. A systematic review of the literature was done for GBD 2016 with the following search terms:

**Diabetes mellitus search string:** (diabetes[TI] AND (prevalence[TIAB] OR incidence[TIAB])) OR ('diabetes mellitus'[MeSH Terms] AND 'epidemiology'[MeSH Terms]) OR (diabetes[TI] AND 'epidemiology'[MeSH Terms]) NOT gestational[All Fields] NOT ('neoplasms'[MeSH Terms] OR 'neoplasms'[All Fields] OR 'cancer'[All Fields]) NOT ('mice'[MeSH Terms] OR 'mice'[All Fields]) NOT ('schizophrenia'[MeSH Terms] OR 'schizophrenia'[All Fields]) NOT ('emigrants and immigrants'[MeSH Terms] OR ('emigrants'[All Fields] AND 'immigrants'[All Fields]) OR 'emigrants and immigrants'[All Fields] OR 'immigrants'[All Fields]) NOT ('pregnancy'[MeSH Terms] OR 'pregnancy'[All Fields] OR 'gestation'[All Fields]) NOT ('rats'[MeSH Terms] OR 'rats'[All Fields] OR 'rat'[All Fields]) NOT ('kidney'[MeSH Terms] OR 'kidney'[All Fields]) NOT renal[All Fields] NOT ('vitamins'[Pharmacological Action] OR 'vitamins'[MeSH Terms] OR 'vitamins'[All Fields] OR 'vitamin'[All Fields])

And

**FPG search string:** (("glucose"[Mesh] OR "hyperglycemia"[Mesh] OR "prediabetic state"[Mesh]) AND "Geographic Locations"[Mesh] NOT "United States"[Mesh]) AND ("humans"[Mesh] AND "adult"[MeSH]) AND ("Data Collection"[Mesh] OR "Health Services Research"[Mesh] OR "Population Surveillance"[Mesh] OR "Vital statistics"[Mesh] OR "Population"[Mesh] OR "Epidemiology"[Mesh] OR "surve\*"[TiAb]) NOT Comment[ptyp] NOT Case Reports[ptyp]) NOT "hospital"[TiAb]

Search date: January 5, 2017

The search took place for the following dates: 1/1/2016– 12/31/2016. The number of studies returned was 1,976, and the number of studies extracted was 26.



2. We systematically searched the Global Health Data Exchange (GHDx) for multi-country survey programs, national surveys, and longitudinal studies that was tagged with either fasting plasma glucose (FPG) or Diabetes mellitus. Each data source we found was tagged with whether the file contained microdata and whether the file contained data on FPG (biomarker). In the interest of time, we prioritized the data sources we reviewed and extracted based on whether the source was tagged with microdata and biomarker information.
3. To capture any remaining sources not identified in the GHDx or in PubMed, we looked to other leaders in the field to ensure our datasets were as comprehensive as possible. These included data sources used by other research groups that report on the global burden of diabetes<sup>3,4</sup>, microdata from not-yet published national studies, and publications that were not captured in the PubMed search string.

**Figure 1: PRISMA diagram of data sources used in GBD 2016 Diabetes mellitus model**

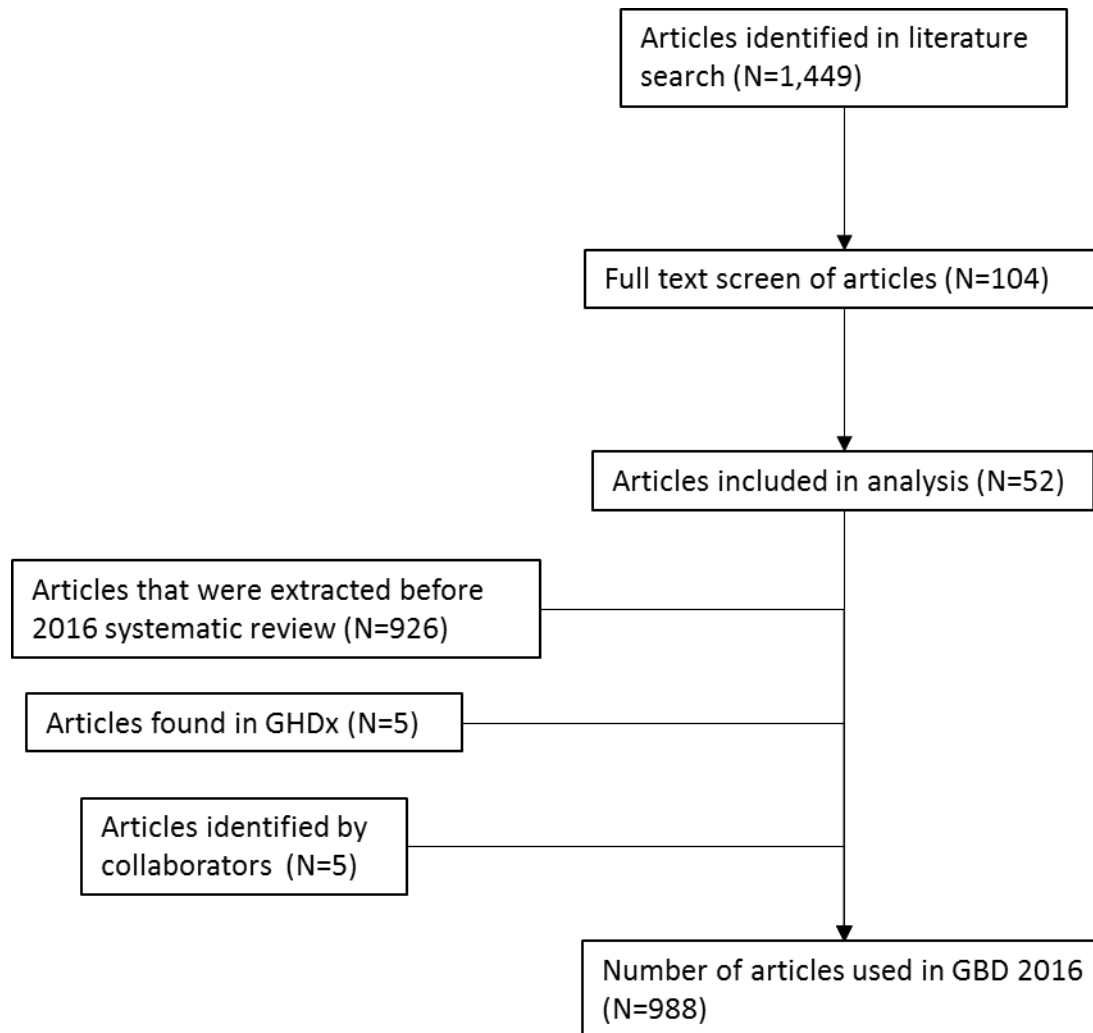

The table below illustrates the number of data sources used for the GBD 2016 estimation of diabetes mellitus parent:

|         | Prevalence | Incidence | Mortality risk | Relative risk |
|---------|------------|-----------|----------------|---------------|
| Studies | 806        | 132       | 8              | 1             |

## Data inputs

### *Purpose:*

To incorporate all available data related to population-representative estimates of diabetes, we accepted other measures of blood sugar (hemoglobin A1c, oral glucose tolerance test, post prandial glucose test) to define diabetes and mean fasting plasma glucose (FPG) in a population when data on diabetes was not available as data inputs.

### *Data:*

1. Data inputs come from 4 sources:
  - Estimates of diabetes in a representative population
  - Estimates of mean FPG in a representative population
  - Individual-level data of fasting plasma glucose measured from surveys
  - MarketScan, which are insurance claims data from the United States

When a study reported both mean fasting plasma glucose (FPG) and prevalence of diabetes, we used the prevalence of diabetes. Where possible, individual-level data from a cohort superseded any data described in a study. Individual-level data was collapsed and aggregated to produce estimates for each age group, sex, location, and year a survey is conducted.

### 2. Covariates

To inform our estimates in data-sparse countries, we systematically tested a range of covariates and selected two covariates based on AIC and adjusted  $R^2$ . These included prevalence of obesity per location and lag-distributed income per capita (LDI).

## Data processing

We perform several processing steps to the data in order to address sampling and measurement inconsistencies that will ensure the data are comparable across data sources and between high fasting plasma glucose modeling efforts.

1. *Small sample size:* Estimates in a sex and age group with a sample size <30 persons was considered a small sample size. In order to avoid small sample size problems that may bias estimates, data were collapsed into the next age group in the same study till the sample size reached at least 30 persons. The intent of collapsing the data is to preserve as much granularity

between age groups as possible which determined whether the collapse occurred with a younger or older age group. If the entire study sample consisted of <30 persons and did not include a population-weight, the study was excluded from the modeling process. The estimates were re-calculated if case count and sample size were available or the population-weighted estimate was calculated when only sample size was available.

## 2. Time, Age, and Sex Splitting

- a. Time: Prior to modeling in DisMod, any study period that spanned more than 5 years was duplicated.
- b. Age: Prior to modeling in DisMod, data provided in age groups wider than the GBD 5-year age groups were split using the global age pattern of diabetes mellitus from data that were in age groups less than 20-year age groups. Uncertainty was propagated by multiplying the standard error of the data performed by the square root of the number of splits performed.
- c. Sex: Prior to modeling in DisMod, data that does not differentiate gender is split into male and female according to the global male to female ratio from data with sex-specific data. Uncertainty was propagated by multiplying the standard error of the data performed by the square root of the number of splits performed.

3. *Mean FPG processing*: For more details on how datapoints on mean FPG was processed, please see the [High Fasting Plasma Glucose capstone appendix in the GBD 2016 Risk Factors Paper](#).

## 4. *Crosswalks*

### 1. Case-definition

We performed adjustments (crosswalks) to datapoints to standardize data to a reference definition: fasting plasma glucose (FPG) >126 mg/dL (7 mmol/L) or on treatment.

#### a. Prevalence

##### i. Single-component

Single component case definitions consisted of diabetes defined based on the level of only one biomarker (e.g., FPG, HbA1c).

##### 1. FPG

We used an ensemble distribution to standardized the case definition of diabetes in surveys by estimating the prevalence of diabetes under different thresholds of FPG. We used individual-level measures of FPG in surveys of a representative population. This allowed us to capture the non-systematic change in the proportion of population above different levels of FPG. We adjusted the datapoint by applying the ratio between FPG above 126 mg/dL and the case-definition used in the study. For more details on the approach used in the ensemble distribution, please see the [GBD 2016 Risk Factors Paper](#).

##### 2. HbA1c

We assumed that HbA1c >6.5% was equivalent to FPG >126 mg/dL.

##### ii. Multi-component

Multi-component case definition consisted of studies where more than 1 glucose test was used in the study to identify different segments of the population (e.g. FPG and PPG).

1. Multi-component that includes FPG >126 mg/dL

Multi-component case definitions that consisted of FPG >126 mg/dL were assumed to be equivalent to the reference case definition FPG >126 mg/dL or Treatment.

2. Multi-component that does not include FPG >126 mg/dL

Case definitions that did not include FPG >126 mg/dL were excluded from the model.

b. Non-prevalence measure

Data from studies with non-prevalence measures (e.g., incidence, relative risk, excess mortality) were marked with the case definition and adjusted to the reference case definition within DisMod.

2. MarketScan

Data from MarketScan were included in the model and a study-level covariate was included in the model to adjust them. These datapoints were adjusted to the reference case definition within DisMod.

3. Estimate prevalence of diabetes from mean FPG

We also used the ensemble distribution to estimate the prevalence of diabetes based on mean FPG in locations where data on prevalence of diabetes were not available. For more details on the approach used in the ensemble distribution, please see the [GBD 2016 Risk Factors Paper](#).

## Amputation due to diabetes mellitus

### Data seeking

A systematic review of the literature was performed for GBD 2016 with the following search terms:

('diabetes mellitus'[MeSH Terms] OR ('diabetes'[All Fields] AND 'mellitus'[All Fields]) OR 'diabetes mellitus'[All Fields]) AND 'amputation'[All Fields] AND (proportion OR prevalence OR incidence) NOT gestational NOT cancer NOT mice NOT schizophrenia NOT immigrants NOT gestation NOT rat NOT kidney NOT renal NOT vitamin

- Dates of search: 1/1/16-12/31/16
- Number of studies returned: 16
- Number of studies extracted: 1

The table below indicates the data inputs for the GBD 2016 estimation of amputation due to diabetes mellitus.

|         | Prevalence | Incidence | Mortality risk |
|---------|------------|-----------|----------------|
| Studies | 12         | 32        | 5              |

## Diabetic neuropathy

### Data seeking

A systematic review of the literature was performed for GBD 2016 with the following search terms:

("diabetes mellitus"[MeSH Terms] OR ("diabetes"[All Fields] AND "mellitus"[All Fields]) OR "diabetes mellitus"[All Fields]) AND neuropathy[All Fields] AND (proportion OR prevalence OR incidence) NOT gestational NOT cancer NOT mice NOT schizophrenia NOT immigrants NOT gestation NOT rat NOT kidney NOT renal NOT vitamin

- Dates: 1/1/16-12/31/16
- Number of studies returned: 170
- Number of studies extracted: 1

The table below illustrates the model inputs for the GBD 2016 estimation process:

|         | Proportion |
|---------|------------|
| Studies | 89         |

## Diabetic foot ulcer

### Data seeking

A systematic review of the literature was performed for GBD 2016 with the following search terms:

((("diabetes mellitus"[MeSH Terms] OR ("diabetes"[All Fields] AND "mellitus"[All Fields]) OR "diabetes mellitus"[All Fields] OR "diabetes"[All Fields]) AND ("foot"[MeSH Terms] OR "foot"[All Fields]) AND ("ulcer"[MeSH Terms] OR "ulcer"[All Fields])) NOT ("neoplasms"[MeSH Terms] OR "neoplasms"[All Fields] OR "cancer"[All Fields]) NOT ("mice"[MeSH Terms] OR "mice"[All Fields]) NOT ("emigrants and immigrants"[MeSH Terms] OR ("emigrants"[All Fields] AND "immigrants"[All Fields]) OR "emigrants and immigrants"[All Fields] OR "immigrants"[All Fields]) NOT ("pregnancy"[MeSH Terms] OR "pregnancy"[All Fields] OR "gestation"[All Fields]) NOT ("vitamins"[Pharmacological Action] OR "vitamins"[MeSH Terms])

OR "vitamins"[All Fields] OR "vitamin"[All Fields]) NOT renal[All Fields] NOT ("kidney"[MeSH Terms] OR "kidney"[All Fields]) AND (proportion[All Fields] OR "incidence"[All Fields] OR "prevalence"[All Fields]) NOT ("schizophrenia"[MeSH Terms] OR "schizophrenia"[All Fields]) NOT ("rats"[MeSH Terms] OR "rats"[All Fields] OR "rat"[All Fields]))

- Dates: 1/1/16-12/31/16
- Number of studies returned: 48
- Number of studies extracted: 0

The table below illustrates the data inputs used for the GBD 2016 modeling process.

|         |            |
|---------|------------|
|         | Proportion |
| Studies | 43         |

## Modeling strategy

### *DisMod Model*

For GBD 2016, we estimated the overall prevalence of diabetes using DisMod MR-2.1, a Bayesian metaregression. DisMod-MR produces estimates of the prevalence of diabetes for each age, sex, geographic location, and year. We also estimated amputation due to diabetes mellitus, diabetic neuropathy, and diabetic foot using DisMod. We then multiply all proportion draws from neuropathy/foot/amputation models by the parent diabetes model so that all estimates are in the same population-space.

Next, we squeeze (neuropathy + moderate vision loss + severe vision loss) to (90% of parent diabetes) prevalence if sum exceeds that 90%. This is to ensure that at least 10% of diabetes cases are uncomplicated for all draws. We then squeeze (amputation + foot ulcer) to (90% of neuropathy) prevalence if sum exceeds 90%. This is to ensure that at least 10% of diabetic neuropathy cases do not have foot ulcer or amputation for all draws. This treats foot ulcer and amputation as mutually exclusive categories by assuming a patient won't have both simultaneously.

From here, we calculate uncomplicated diabetes as the remainder of diabetes cases exclusive of neuropathy and vision loss. In addition, we estimate the prevalence of amputation due to diabetes is split into with and without treatment using scaled HSA values. For diabetic amputation, we calculated a distribution of treated versus untreated amputation, defined as receiving a prosthetic or not. We first rescaled the IHME health system access estimates to be between 0 and 0.9, under the assumption that 10% of amputees will not receive a prosthetic, even in high income countries. We based this assumption on the retrospective study by Moore et al, which found that about 80% of patients following major lower extremity amputation were fitted with prostheses in the authors' institutions from 1978 to 1986 in the USA. We then performed a population-weighted average of this country-specific value to obtain a proxy for the proportion of amputees that receive a prosthetic by super region. Because these are rough

estimates based on large assumptions, we applied confidence intervals of +/- 50% of the value to reflect our uncertainty.

### Diabetes mellitus

- We set a value prior of 0 for remission for ages 0 to 14
- We set a value prior of a maximum value of 0.01 for remission for ages 15 to 100
- We set a value prior of a maximum value of 0.15 for excess mortality for all ages
- We set a value prior of 0 for incidence for ages 0 to 1
- We set a value prior of a maximum value of 0.1 for incidence for ages 1 to 100

| Study covariate           | Parameter                     | beta                       | Exponentiated beta    |
|---------------------------|-------------------------------|----------------------------|-----------------------|
| Sex                       | With-condition mortality rate | 0.27 (-0.9 — 1.49)         | 1.31 (0.41 — 4.45)    |
| LDI (I\$ per capita)      | Excess mortality rate         | -0.24 (-0.25 — -0.22)      | 0.79 (0.78 — 0.80)    |
| All MarketScan, year 2000 | Prevalence                    | -0.48 (-0.53 — -0.43)      | 0.62 (0.59 — 0.65)    |
| All MarketScan, year 2010 | Prevalence                    | -0.17 (-0.21 — -0.11)      | 0.85 (0.81 — 0.90)    |
| All MarketScan, year 2012 | Prevalence                    | -0.15 (-0.2 — -0.091)      | 0.86 (0.82 — 0.91)    |
| Obesity                   | Prevalence                    | 2.76 (2.46 — 3.07)         | 15.79 (11.66 — 21.57) |
| Sex                       | Prevalence                    | 0.17 (0.15 — 0.19)         | 1.18 (1.16 — 1.21)    |
| Sex                       | Incidence                     | 0.035 (-0.042 — 0.11)      | 1.04 (0.96 — 1.12)    |
| Sex                       | Excess mortality rate         | 0.18 (0.15 — 0.20)         | 1.19 (1.16 — 1.23)    |
| Sex                       | Cause-specific mortality rate | 0.00030 (-0.0058 — 0.0059) | 1.00 (0.99 — 1.01)    |

Our estimate of the age-standardized global prevalence of diabetes is slightly lower than the estimates reported previously by the NCD Risk Factor Collaboration (NCD-RisC) and International Diabetes Federation (IDF). IDF reported a prevalence for the year 2013 of 8.3% (7.2–11.3) at ages 20 to 80, compared to our estimate for 2016 of 6.0% (5.1–7.0) for the same age range and using the IDF method of age-standardization (NCD-RisC:

<http://www.sciencedirect.com/science/article/pii/S0140673616006188> IDF:

<https://www.idf.org/component/attachments/attachments.html?id=1093&task=download>.) The NCD-RisC estimates of prevalence for ages over 18 for the year 2014 were 9.0% (7.2–11.1) in males and 7.9% (6.7–9.7) in females, compared to our 2016 estimates of 5.3% (4.5–6.2) and 4.9% (4.1–5.7), respectively. Several factors can explain the difference in estimates. We include a greater number of data sources but

exclude surveys with self-reported diagnosis of diabetes unlike NCD-RisC. We also define the whole distribution of fasting plasma glucose (FPG) and thus have a more accurate way of including surveys that report on FPG only in our diabetes disease model.

### Amputation due to diabetes

- We set a value prior of 0 for incidence for ages 0 to 15
- We set a value prior of 0 for remission for all ages
- We crosswalked the incidence of either above or below knee amputation only to the incidence of all amputations

#### *DisMod Model*

| Study covariate            | Parameter | beta                  | Exponentiated beta |
|----------------------------|-----------|-----------------------|--------------------|
| Above knee amputation only | Incidence | -0.32 (-0.6 — -0.034) | 0.72 (0.55 — 0.97) |
| Below knee amputation only | Incidence | -0.44 (-0.72 — -0.18) | 0.64 (0.49 — 0.83) |

### Diabetic neuropathy

- We set a value prior on the proportion of 0 from ages 0 to 1
- We crosswalked data from studies using alternate diagnostic criteria using as reference studies which used the monofilament test as their diagnostic criteria

#### *DisMod Model*

| Study covariate                                | Parameter  | Beta                  | Exponentiated beta |
|------------------------------------------------|------------|-----------------------|--------------------|
| Diagnostic vibration perception threshold test | Proportion | -0.13 (-0.33 — 0.11)  | 0.88 (0.72 — 1.12) |
| Diagnostic method - nerve conduction velocity  | Proportion | -0.25 (-0.5 — 0.029)  | 0.78 (0.61 — 1.03) |
| Diagnostic method - clinical exam only         | Proportion | -0.044 (-0.27 — 0.21) | 0.96 (0.76 — 1.24) |
| Diagnostic validated neuropathy scoring        | Proportion | -0.021 (-0.23 — 0.20) | 0.98 (0.79 — 1.23) |

### Diabetic foot ulcer

- We set a value prior on the proportion of 0 from ages 0 to 10.
- We crosswalked data from studies investigating hospitalized patients only using as reference studies which captured all diabetic foot ulcers.

#### *DisMod Model*



| Study covariate | Parameter  | beta               | Exponentiated beta |
|-----------------|------------|--------------------|--------------------|
| Hospital data   | Proportion | 0.52 (0.13 – 0.87) | 1.68 (1.14 – 2.38) |

## Severity split inputs

Severity splits and disability weights were determined by the GBD disability weight survey assessment for diabetes mellitus. The table below illustrates the severity levels, lay descriptions, and associated disability weights:

| Severity level                                | Lay description                                                                                                                                      | DW (95% CI)           |
|-----------------------------------------------|------------------------------------------------------------------------------------------------------------------------------------------------------|-----------------------|
| Uncomplicated diabetes mellitus               | Has a chronic disease that requires medication every day and causes some worry, but minimal interference with daily activities                       | 0.049 (0.031 – 0.072) |
| Diabetic neuropathy                           | Has pain, tingling, and numbness in the arms, legs, hands, and feet. The person sometimes gets cramps and muscle weakness.                           | 0.133 (0.089 – 0.187) |
| Diabetic neuropathy with diabetic foot        | Has a sore on the foot that is swollen and causes some difficulty in walking.                                                                        | <sup>a</sup>          |
| Diabetic neuropathy with treated amputation   | Has lost part of one leg, leaving pain and tingling in the stump. The person has an artificial leg that helps in moving around.                      | <sup>a</sup>          |
| Diabetic neuropathy with untreated amputation | Has lost part of one leg, leaving pain and tingling in the stump. The person does not have an artificial leg, has frequent sores, and uses crutches. | <sup>a</sup>          |
| Moderate vision loss due to diabetes mellitus | Has vision problems that make it difficult to recognize faces or objects across a room.                                                              | 0.031 (0.019 – 0.049) |
| Severe vision loss due to diabetes mellitus   | Has severe vision loss, which causes difficulty in daily activities, some emotional impact (for example worry), and                                  | 0.184 (0.125 – 0.259) |

|                                    |                                                                                                                                                                 |                      |
|------------------------------------|-----------------------------------------------------------------------------------------------------------------------------------------------------------------|----------------------|
|                                    | some difficulty going outside the home without assistance.                                                                                                      |                      |
| Blindness due to diabetes mellitus | Is completely blind, which causes great difficulty in some daily activities, worry and anxiety, and great difficulty going outside the home without assistance. | 0.187 (0.124 – 0.26) |

<sup>a</sup> The disability weights are produced from a combination of two health states: neuropathy and diabetic foot/amputation

Moore TJ, Barron J, Hutchinson F 3rd, Golden C, Ellis C, Humphries D. **Prosthetic usage following major lower extremity amputation.** *Clin Orthop Relat Res.* 1989 Jan;(238):219-24.

# Acute Glomerulonephritis

## Flowchart

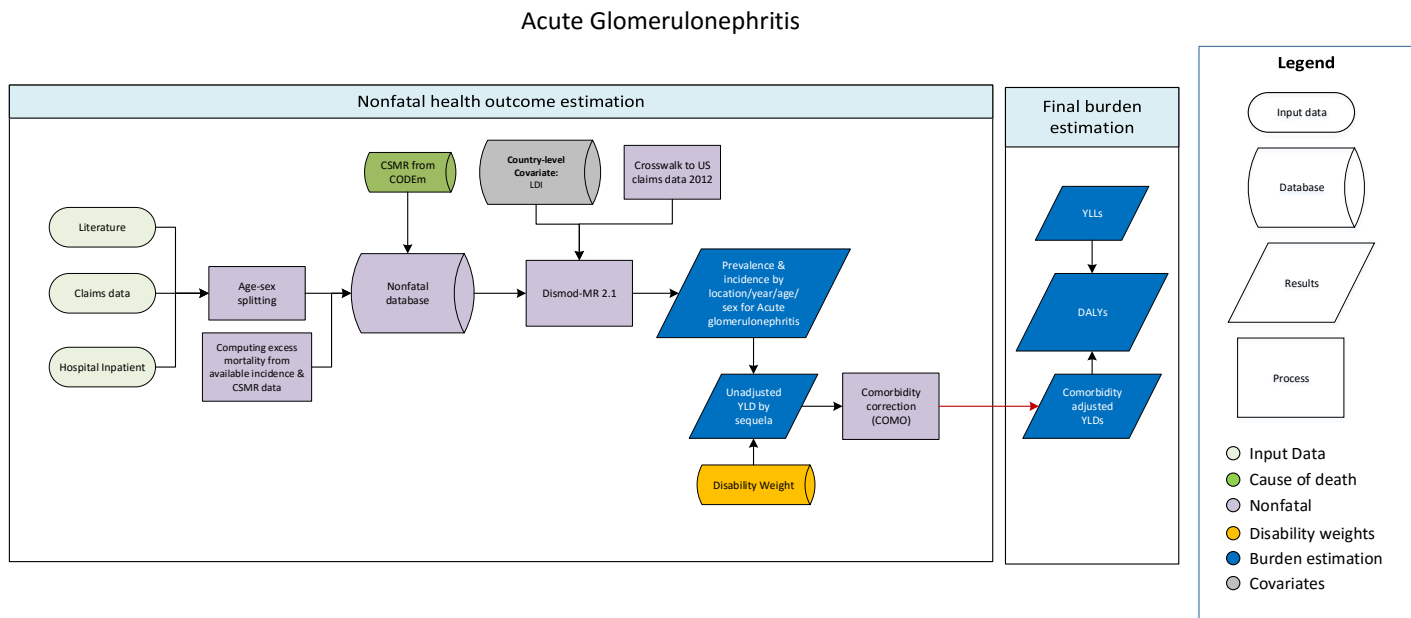

## Case Definition

Acute glomerulonephritis (AG) (or post-infectious glomerulonephritis) is an acute episode of hematuria, edema, hypertension, and acute kidney injury that typically follows infection with specific strains of group A beta-hemolytic streptococcus. As used in the GBD study, this term is synonymous with post-streptococcal or post-staphylococcal glomerulonephritis. This disease is typically seen in children but can demonstrate a bimodal distribution as early life immunity wanes within older years. ICD codes include N00, N00.0, N00.1, N00.2, N00.3, N00.4, N00.5, N00.6, N00.7, N00.8, N00.9, N01, N01.1, N01.2, N01.3, N01.4, N01.5, N01.6, N01.7, N01.8, and N01.9.

## Input data

### *Model inputs*

For GBD 2010, a systematic review of the prevalence of AG throughout the world was conducted. This search was updated for GBD 2013 and GBD 2015. For GBD 2016 a PubMed search was conducted using the following search terms: (Acute Glomerulonephritis[Title/Abstract] OR GN [Title/Abstract]) AND (Prevalen\*[Title/Abstract] OR Inciden\*[Title/Abstract]) AND ("2015/01/01"[PDAT] : "3000"[PDAT]) AND "humans"[MeSH Terms].

The exclusion criteria were:

35. Studies clearly not representative of the national population
36. Studies that did not provide primary data on epidemiological parameters, eg, a commentary piece

### 37. Studies that describe non-infectious glomerulonephritis epidemiology

Twenty-eight studies were identified through this search. Two studies were identified for full text screening. Neither of these studies was determined to meet inclusion criteria after full-text screening. The most recent literature source dates from 2013. Twenty-one articles have been included in total.

Data from US claims data for 2000, 2010, and 2012 by US state were included. Hospital inpatient data was also included. Inpatient data points that exceeded the maximum observed age-standardized rate in the US inpatient data by a margin of 25% or greater were excluded from analysis.

The table below shows the number of studies included in GBD 2016, as well as the number of countries and GBD world regions represented by either studies or hospital data.

|             | Incidence |
|-------------|-----------|
| Studies     | 73        |
| Geographies | 360       |
| Regions     | 15        |

#### *Severity split & disability weight*

The basis of the GBD disability weight assessment is lay descriptions of sequelae highlighting major functional consequences and symptoms. Disability weighting (DW) for AG associates with systemic symptoms of fever, aches, weakness, and some difficulty with daily activities. The lay description and disability weight for acute glomerulonephritis are shown below.

| Cause                    | Lay description                                                                            | DW (95% CI)            |
|--------------------------|--------------------------------------------------------------------------------------------|------------------------|
| Acute glomerulonephritis | Has a fever and aches, and feels weak, which causes some difficulty with daily activities. | 0.051<br>(0.032–0.074) |

#### **Modelling strategy**

We ran a DisMod-MR 2.1 model to produce estimates by age, sex, year, and country. Prior settings in the DisMod model included setting remission of three to four weeks. It was assumed that no one was born with AG.

We applied a crosswalk to all US claims data to adjust to 2012 US claims data. Inpatient data was adjusted to account for multiple admissions and multiple diagnoses, based on MarketScan data, and was adjusted to 2012 US claims data in DisMod. We used the function in DisMod-MR 2.1 to pull in cause-specific mortality rate (CSMR) data from our CODEm and CODcorrect analyses and match them with incidence data points for the same geography and study year to estimate priors on excess mortality rates (by dividing CSMR by incidence).

We included the covariate Lagged Distributed Income (LDI) as a country-level covariate to inform excess mortality, with bounds of -0.5, -0.1.

Betas and exponentiated values (which can be interpreted as an odds ratio) are shown in the table below:

| Covariate            | Parameter             | beta                   | Exponentiated beta |
|----------------------|-----------------------|------------------------|--------------------|
| Claims data - 2000   | Incidence             | -0.2 (-0.24 — -0.16)   | 0.82 (0.79 — 0.86) |
| Claims data - 2010   | Incidence             | -0.11 (-0.15 — -0.063) | 0.89 (0.86 — 0.94) |
| Hospital data        | Incidence             | -0.9 (-0.9 — -0.9)     | 0.41 (0.41 — 0.41) |
| LDI (I\$ per capita) | Excess mortality rate | -0.1 (-0.1 — -0.1)     | 0.90 (0.90 — 0.90) |

Compared to GBD 2015, major changes include inclusion of inpatient data from a greater number of geographies.

# Chronic Kidney Disease

## Flowchart

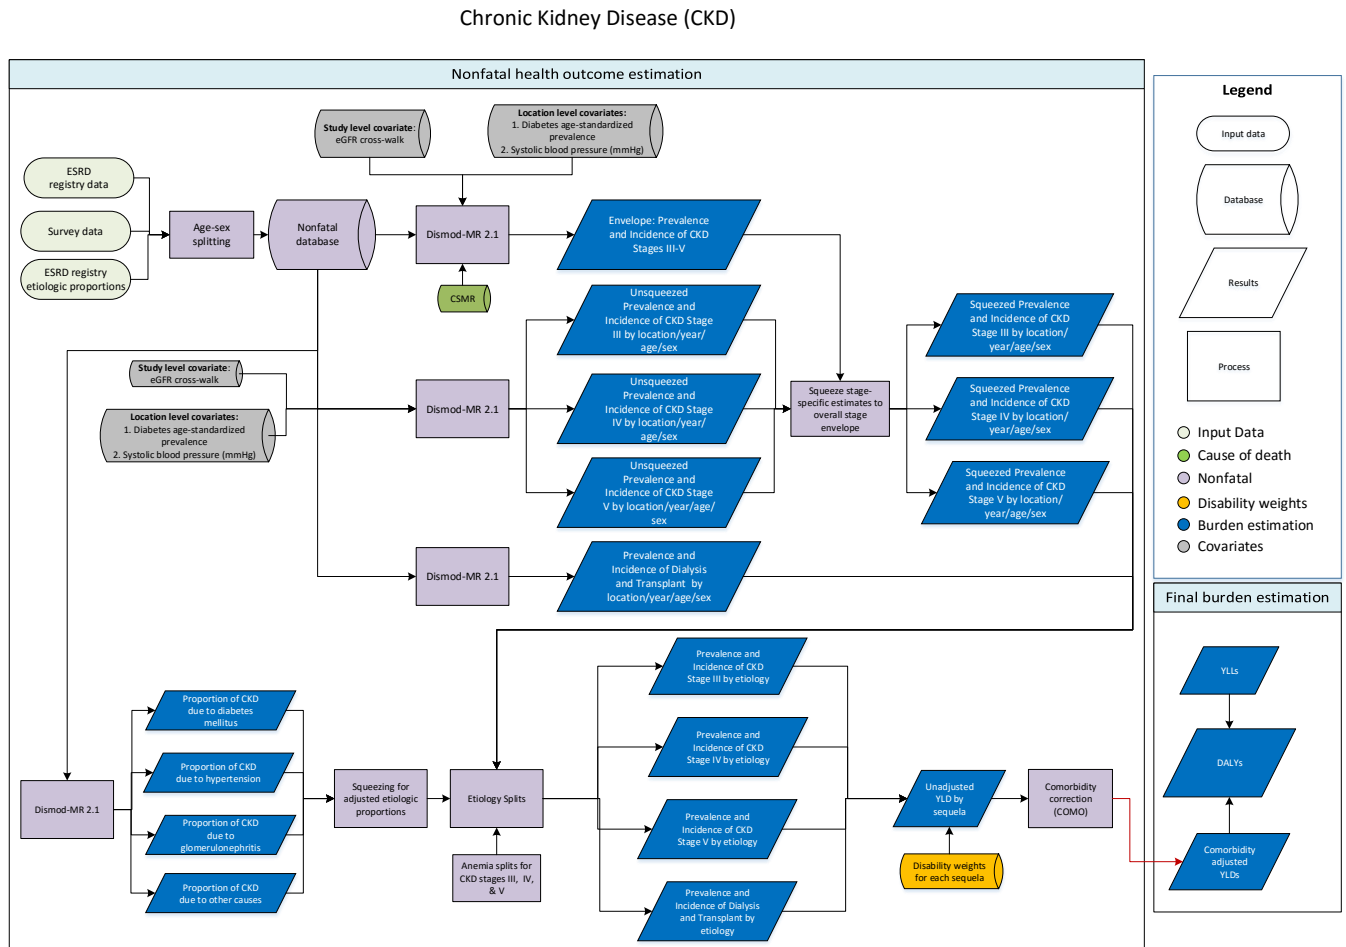

## Case definition

Chronic kidney disease (CKD) is defined as a permanent loss of renal function as indicated by estimated glomerular filtration rate (eGFR). The GBD study considers five stages of CKD as defined by degree of loss of renal function or receipt of renal replacement therapy: CKD Stage III (eGFR 30-60ml/min/1.73m<sup>2</sup>), CKD Stage IV (eGFR 15-30ml/min/1.73m<sup>2</sup>), CKD Stage V (eGFR <15ml/min/1.73m<sup>2</sup>, not on renal replacement therapy), maintenance dialysis, and renal transplantation.<sup>1</sup> The ICD-10 codes associated with CKD include N18.1-N18.9.

## Input data

### *Model inputs*

For GBD 2010, a systematic review of the prevalence of CKD throughout the world was conducted. This search was updated for GBD 2013 and GBD 2015. For GBD 2016 this literature search was repeated using PubMed search terms: (((("chronic kidney disease"[Title/Abstract]) AND prevalen\*[Title/Abstract]) AND ("2015/1/1"[Date - Publication] : "3000"[Date - Publication])) NOT ((animals[MeSH] NOT humans[MeSH])))).

The exclusion criteria were:

38. Studies clearly not representative of the national population
39. Studies that did not provide primary data on epidemiological parameters, eg, a commentary piece
40. Studies of a specific etiology of CKD
41. Studies not reporting on CKD by stage

This literature search was augmented by identification of population-based surveys that measured renal function. For maintenance dialysis and renal transplantation, data were largely obtained from registry reports.

The next planned PubMed search will be conducted for GBD 2017.

| Disease               | Number of sources |
|-----------------------|-------------------|
| CKD Stage III         | 112               |
| CKD Stage IV          | 94                |
| CKD Stage V           | 92                |
| Maintenance dialysis  | 534               |
| Renal transplantation | 430               |

### *Severity splits & disability weights*

Estimates of prevalence and incidence are split using CKD etiology proportion models, resulting in CKD estimates by stage and etiology. Then a portion of each etiology split for CKD stages III, IV, and V is attributed a disability weight associated with mild, moderate, or severe anemia.<sup>2</sup>

| Severity level                     | Lay description                                                                                                                   | Disability weight (95% CI) |
|------------------------------------|-----------------------------------------------------------------------------------------------------------------------------------|----------------------------|
| CKD stage III without anemia       | Asymptomatic                                                                                                                      | --                         |
| CKD stage III with mild anemia     | Feels slightly tired and weak at times, but this does not interfere with normal daily activities.                                 | 0.004<br>(0.001–0.008)     |
| CKD stage III with moderate anemia | Feels moderate fatigue, weakness, and shortness of breath after exercise, making daily activities more difficult.                 | 0.052<br>(0.034–0.076)     |
| CKD stage III with severe anemia   | Feels very weak, tired, and short of breath, and has problems with activities that require physical effort or deep concentration. | 0.149<br>(0.101–0.21)      |

|                                                 |                                                                                                                                                                     |                        |
|-------------------------------------------------|---------------------------------------------------------------------------------------------------------------------------------------------------------------------|------------------------|
| CKD stage IV without anemia                     | Tires easily, has nausea, reduced appetite, and difficulty sleeping.                                                                                                | 0.104<br>(0.07–0.147)  |
| CKD stage IV with mild anemia                   |                                                                                                                                                                     | 0.108<br>(0.072–0.151) |
| CKD stage IV with moderate anemia               |                                                                                                                                                                     | 0.15<br>(0.103–0.207)  |
| CKD stage IV with severe anemia                 |                                                                                                                                                                     | 0.237<br>(0.165–0.324) |
| CKD stage V without anemia                      | Has lost a lot of weight and has constant pain. The person has no appetite, feels nauseated, and needs to spend most of the day in bed.                             | 0.569<br>(0.389–0.727) |
| CKD stage V with mild anemia                    |                                                                                                                                                                     | 0.570<br>(0.391–0.727) |
| CKD stage V with moderate anemia                |                                                                                                                                                                     | 0.591<br>(0.414–0.743) |
| CKD stage V with severe anemia                  |                                                                                                                                                                     | 0.631<br>(0.456–0.782) |
| End-stage renal disease, on dialysis            | Is tired and has itching, cramps, headache, joint pains, and shortness of breath. The person needs intensive medical care every other day lasting about half a day. | 0.571<br>(0.397–0.725) |
| End-stage renal disease, with kidney transplant | Sometimes feels tired and down, and has some difficulty with daily activities.                                                                                      | 0.024<br>(0.014–0.039) |

Etiology proportion models are informed by renal registry etiology proportion data. These proportions are applied to the CKD stages as described above. Etiologies included in the GBD study include diabetes mellitus, hypertension, glomerulonephritis, and “other.” “Other” excludes urologic diseases and toxins/poisons as well as cases of unknown etiology.

### Modelling strategy

We ran a DisMod-MR 2.1 model to produce estimates by age, sex, year, and country for each stage of CKD. To account for progression of individuals from stage III to stage IV and stage IV to stage V, we informed remission for stages III and IV. Remission data for stage IV was calculated as the ratio of the incidence of stage V and prevalence of stage IV at the gender, age, and country-matched level. Remission data for stage III were calculated as the ratio of resulting stage IV incidence and stage III prevalence at the gender, age, and country-matched level. Remission was set to 0 for stage V and the excess mortality parameter was used to account for progression to end-stage renal disease and mortality due to CKD stage V. Bounds on excess mortality were informed using a meta-analysis of survival analyses of individuals with untreated CKD stage V.

Data from sources reporting the prevalence of stage III, IV, and V CKD was aggregated to represent the prevalence of stage III-V CKD. We ran a DisMod-MR 2.1 model to produce estimates by age, sex, year, and country for aggregate stage III-V CKD. We used the function in DisMod-MR 2.1 to pull in cause-specific mortality rate (CSMR) data from our chronic kidney disease CODEm and CODcorrect analyses and match them with incidence data points for the same geography and study year to estimate priors on excess mortality rates (by dividing CSMR by incidence). In order to enforce more consistency between stage



models, prevalence of CKD stage III, IV, and V were then scaled to sum to the prevalence and incidence of the stage III-V CKD model, at the gender, age, and country-matched level.

A full description of priors and covariates included in each model can be found in the table below:

|                 | Priors (min,max)                                                                    | Study-level covariate          | Country-level covariate                      |
|-----------------|-------------------------------------------------------------------------------------|--------------------------------|----------------------------------------------|
| CKD stage III   | Remission (0, 0.75)<br>Excess mortality (0, 0.05)                                   | Adjust for estimating equation | Diabetes age-standardised prevalence         |
|                 |                                                                                     |                                | Mean Systolic Blood Pressure                 |
| CKD stage IV    | Remission (0, 0.75)<br>Excess mortality (0, 0.05)                                   | Adjust for estimating equation | Diabetes age-standardised prevalence         |
|                 |                                                                                     |                                | Mean Systolic Blood Pressure                 |
|                 |                                                                                     |                                | Age-standardised prevalence of CKD stage III |
| CKD stage V     | Remission (0, 0)<br>Incidence (0, 0.001), age 0-20<br>Excess mortality (0.29, 0.54) | Adjust for estimating equation | Diabetes age-standardised prevalence         |
|                 |                                                                                     |                                | Mean Systolic Blood Pressure                 |
|                 |                                                                                     |                                | Age-standardised prevalence of CKD stage III |
| CKD stage III-V | Remission (0, 0)<br>Excess mortality (0, 0.54)                                      | Adjust for estimating equation | Diabetes age-standardised prevalence         |
|                 |                                                                                     |                                | Mean Systolic Blood Pressure                 |

We crosswalked data reporting glomerular filtration rate (GFR) estimated with the Modification of Diet in Renal Disease (MDRD) equation to data reported using the CKD-Epi equation as our baseline. GFR reported for children was estimated using the Schwartz equation as the gold standard among the pediatric population. Bounds on the MDRD-CKD-Epi cross walk were informed using a meta-analysis of studies reporting prevalence of CKD by stage using both the MDRD and CKD-Epi equations. Betas and exponentiated values for this crosswalk are shown in the table below:

|             | Study covariate                    | Parameter  | beta                     | Exponentiated beta |
|-------------|------------------------------------|------------|--------------------------|--------------------|
| Stage III   | eGFR calculated with MDRD Equation | Prevalence | 0.27 (0.26 — 0.28)       | 1.31 (1.30 — 1.32) |
| Stage IV    | eGFR calculated with MDRD Equation | Prevalence | -0.0085 (-0.026 — 0.012) | 0.99 (0.97 — 1.01) |
| Stage V     | eGFR calculated with MDRD Equation | Prevalence | -0.093 (-0.14 — -0.035)  | 0.91 (0.87 — 0.97) |
| Stage III-V | eGFR calculated with MDRD Equation | Prevalence | 0.24 (0.23 — 0.25)       | 1.27 (1.26 — 1.28) |

The maintenance dialysis and renal transplant models include bounds on location random effects for East Asia and High-income Asia Pacific. As Taiwan and Japan have rates of renal replacement therapy far out of proportion to other countries in their regions, these bounds prevent renal replacement therapy estimates for surrounding countries lacking data from overinflating. Remission data for dialysis was calculated as

the ratio of the incidence of renal transplantation to prevalence of dialysis at the gender, age, and country-matched level.

Major changes for GBD 2016 include attribution of anemia to stage V CKD, the switch from the MDRD equation to the CKD-Epi equation as our reference, and the use of a CKD envelope to scale individual stage estimates.

# Interstitial Nephritis

## Flowchart

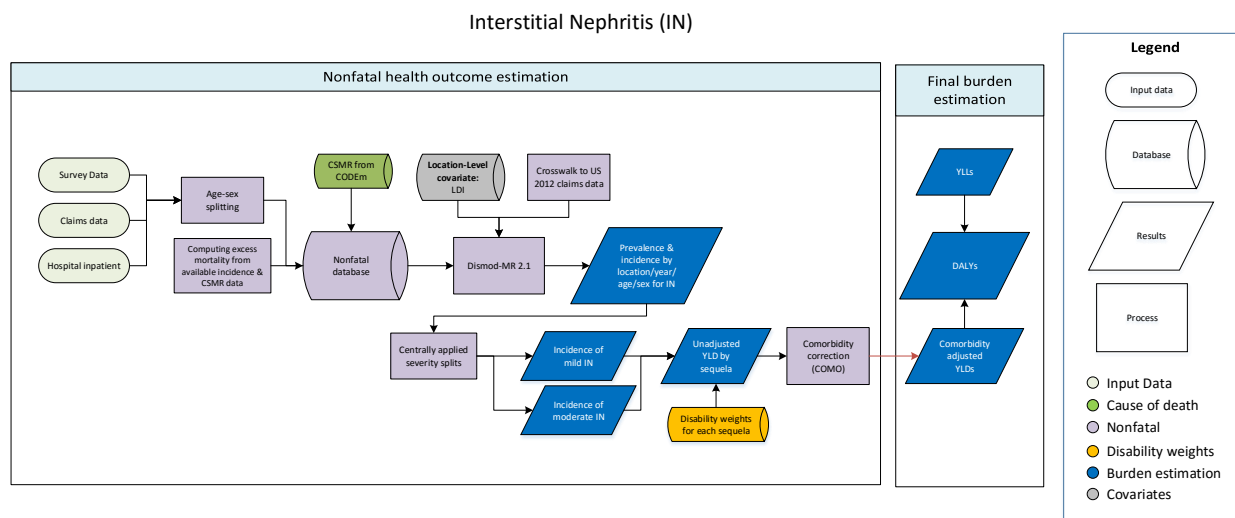

## Case definition

Interstitial nephritis (IN) is defined as a kidney infection that can lead to systemic symptoms such as fever and weakness and can cause discomfort and difficulty with daily activities.<sup>1</sup> ICD codes include N10, N10.0, N10.9, N11, N11.0, N11.1, N11.8, N11.9, N12, N12.0, and N12.9.

## Input data

### Model inputs

The interstitial nephritis model is informed by survey data, US state-level claims data, and global hospital inpatient and outpatient data. For GBD 2016, a systematic review of the prevalence of IN throughout the world was conducted using the following search terms: (((Interstitial Nephritis[Title/Abstract]) OR (Urinary Tract Infection[Title/Abstract]))AND (Inciden\*[Title/Abstract])) AND ("2013/01/01"[Date - Publication] : "3000"[Date - Publication]) NOT (animals[MeSH] NOT humans[MeSH]).

The exclusion criteria were:

42. Studies clearly not representative of the national population
43. Studies that did not provide primary data on epidemiological parameters, eg, a commentary piece
44. Studies of a specific type of interstitial nephritis

The table below shows the number of countries and GBD world regions represented.

|                        | Incidence |
|------------------------|-----------|
| Countries/subnationals | 330       |
| GBD world regions      | 15        |

Data from US claims data for 2000, 2010, and 2012 by US state were included. Hospital inpatient data was also included. Inpatient data points that exceeded the maximum observed age-standardized rate in the US claims data by a margin of 25% or greater were excluded from analysis.

### *Severity splits & disability weights*

The basis of the GBD disability weight survey assessments is lay descriptions of sequelae highlighting major functional consequences and symptoms. Interstitial nephritis is split into mild and moderate severity. Mild severity is associated with a disability weight that correlates with low fever, mild discomfort, but no difficulty with daily activities. Moderate discomfort is associated with a disability weight that correlates with systemic symptoms of fever, aches, weakness, and some difficulty with daily activities. The lay descriptions and disability weights for IN are shown below.

| Severity level                                               | Lay description                                                                            | DW (95% CI)             |
|--------------------------------------------------------------|--------------------------------------------------------------------------------------------|-------------------------|
| Interstitial nephritis and urinary tract infection, mild     | Has a low fever and mild discomfort, but no difficulty with daily activities.              | 0.006<br>(0.002, 0.012) |
| Interstitial nephritis and urinary tract infection, moderate | Has a fever and aches, and feels weak, which causes some difficulty with daily activities. | 0.051<br>(0.032, 0.074) |

The severity distribution of interstitial nephritis was derived from analysis of the Medical Expenditure Panel Surveys (MEPS). MEPS is an overlapping panel survey of the non-institutionalized US population that collects data on respondents' health service interactions. Panels are initiated every year. Each panel is two years long and consists of five rounds. In 2000, MEPS began using 12-Item Short Form Surveys (SF-12) to collect data on functional health status. The SF-12 survey is administered twice per panel (about once per year).

In order to translate SF-12 scores into GBD disability weights, 62 lay descriptions for conditions representing the full range of disability weight values (from most mild to most severe) were selected. A convenience sample of respondents was then asked to complete an SF-12 form for an individual with the health state described in the lay descriptions of these conditions. Composite mental and physical SF-12 score was regressed on GBD disability weight to derive the relationship between disability weight and SF-12 score. Individual respondent scores were then regressed on reported conditions to obtain a comorbidity-corrected condition-specific disability weight. The distribution of these condition-specific weights was used to derive the proportion of individuals with the conditions that fall within each GBD severity category.

| Severity                                | Distribution         |
|-----------------------------------------|----------------------|
| Mild Interstitial Nephritis and UTI     | 0.362 (0.258, 0.478) |
| Moderate Interstitial Nephritis and UTI | 0.638 (0.522, 0.742) |

## Modelling strategy

We ran a DisMod MR-2.1 model to produce estimates by age, sex, year, and location. Prior settings in the IN DisMod 2.1 model included remission after one week between ages 0 and 100. We used the function in DisMod-MR 2.1 to pull in cause-specific mortality rate (CSMR) data from our CODEm and CODcorrect

analyses and match them with incidence data points for the same geography and study year to estimate priors on excess mortality rates (by dividing CSMR by incidence).

We applied a crosswalk to all US claims data to adjust to 2012 US claims data. Inpatient data was adjusted to account for multiple admissions and multiple diagnoses, based on MarketScan data, and an age-sex-specific crosswalk was applied to adjust inpatient hospital data to 2012 US claims data. This crosswalk was applied by comparing the ratio of prevalence indicated by 2012 US claims data to that indicated by US inpatient data and applying these age- and sex-specific adjustment factors to global inpatient hospital data. Adjustment factors and their associated standard errors are presented in the table below.

| Sex    | Age start | Age end | Correction Factor | Standard Error |
|--------|-----------|---------|-------------------|----------------|
| Female | 0         | 0.999   | 8.927             | 0.117          |
| Female | 1         | 4       | 9.460             | 0.168          |
| Female | 5         | 9       | 17.699            | 0.331          |
| Female | 10        | 14      | 21.029            | 0.345          |
| Female | 15        | 19      | 29.738            | 0.350          |
| Female | 20        | 24      | 31.087            | 0.327          |
| Female | 25        | 29      | 31.140            | 0.324          |
| Female | 30        | 34      | 30.919            | 0.318          |
| Female | 35        | 39      | 24.843            | 0.299          |
| Female | 40        | 44      | 18.959            | 0.254          |
| Female | 45        | 49      | 16.083            | 0.230          |
| Female | 50        | 54      | 13.398            | 0.199          |
| Female | 55        | 59      | 12.035            | 0.215          |
| Female | 60        | 64      | 10.162            | 0.180          |
| Female | 65        | 69      | 9.014             | 0.167          |
| Female | 70        | 74      | 7.441             | 0.136          |
| Female | 75        | 79      | 6.268             | 0.135          |
| Female | 80        | 84      | 5.391             | 0.117          |
| Female | 85        | 89      | 4.628             | 0.097          |
| Female | 90        | 94      | 4.289             | 0.094          |
| Female | 95        | 99      | 3.877             | 0.100          |

| Sex  | Age start | Age end | Correction Factor | Standard Error |
|------|-----------|---------|-------------------|----------------|
| Male | 0         | 0.999   | 3.8295            | 0.0848         |
| Male | 1         | 4       | 6.8094            | 0.1377         |
| Male | 5         | 9       | 12.6029           | 0.2488         |
| Male | 10        | 14      | 14.6992           | 0.2576         |
| Male | 15        | 19      | 23.5695           | 0.2911         |
| Male | 20        | 24      | 24.8601           | 0.3068         |
| Male | 25        | 29      | 17.6689           | 0.2530         |
| Male | 30        | 34      | 15.5750           | 0.2220         |
| Male | 35        | 39      | 13.9135           | 0.2181         |
| Male | 40        | 44      | 11.2504           | 0.1873         |
| Male | 45        | 49      | 9.5610            | 0.1669         |
| Male | 50        | 54      | 7.0199            | 0.1374         |
| Male | 55        | 59      | 5.7911            | 0.1390         |
| Male | 60        | 64      | 5.7911            | 0.1310         |
| Male | 65        | 69      | 5.2306            | 0.1233         |
| Male | 70        | 74      | 4.7013            | 0.1039         |
| Male | 75        | 79      | 4.1767            | 0.0968         |
| Male | 80        | 84      | 3.7635            | 0.0823         |
| Male | 85        | 89      | 3.6148            | 0.0736         |
| Male | 90        | 94      | 3.3424            | 0.0752         |
| Male | 95        | 99      | 3.4442            | 0.0960         |

We included the covariate Lagged Distributed Income (LDI) as a country-level covariate to inform excess mortality, with bounds of -0.5, -0.1. We used this covariate based on the assumption of a higher likelihood of mortality based on the developmental status of a country.

Betas and exponentiated values (which can be interpreted as an odds ratio) are shown in the table below:

| Study covariate    | Parameter | beta                           | Exponentiated beta |
|--------------------|-----------|--------------------------------|--------------------|
| Claims data – 2000 | Incidence | -0.042 (-0.072 – -0.01)        | 0.96 (0.93 – 0.99) |
| Claims data – 2010 | Incidence | -0.00074 (-0.0039 – -0.000091) | 1.00 (1.00 – 1.00) |

Compared to GBD 2015, major changes include inpatient data from a greater number of geographies and an age-sex-specific adjustment of inpatient hospital data to US claims data.

# Acute Urolithiasis

## Flowchart

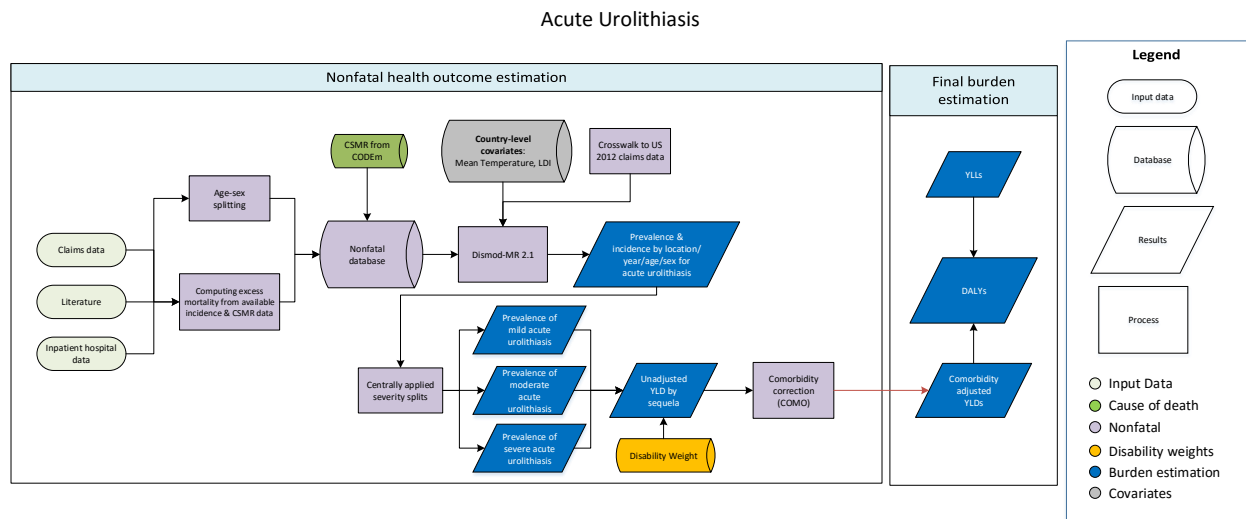

## Case definition

Acute urolithiasis (AU) is an acute and usually symptomatic episode of urolithiasis, defined as stone formation located anywhere along the genitourinary tract.<sup>1</sup> Associated ICD codes include N20, N20.0, N20.1, N20.2, N20.9, N21, N21.1, N21.8, N21.9, N22, N22.0, N22.8, N23, and N23.0.

## Input data

### Model inputs

For GBD 2010, a systematic review of the prevalence of AU throughout the world was conducted. This search was updated for GBD 2013 and again for GBD 2016. A PubMed search was conducted using the following search terms: (Urolithiasis[Title/Abstract] OR Kidney Stones[Title/Abstract]) AND (Prevalence[Title/Abstract] OR Incidence[Title/Abstract]) AND ("2013/01/01"[PDAT] : "3000"[PDAT]) AND "humans"[MeSH Terms].

The exclusion criteria were:

45. Studies clearly not representative of the national population
46. Studies that did not provide primary data on epidemiological parameters, eg, a commentary piece
47. Studies of a specific type of urolithiasis

Four new studies were added based on this systematic review. The below table indicates the number of studies included and number of countries/regions represented by either study or hospital data:

|                        | Prevalence | Incidence |
|------------------------|------------|-----------|
| Sources                | 5          | 70        |
| Countries/subnationals | 5          | 329       |

|                   |   |    |
|-------------------|---|----|
| GBD world regions | 4 | 14 |
|-------------------|---|----|

Data from US claims data for 2000, 2010, and 2012 by US state were included. Hospital inpatient and outpatient data were also included. Inpatient data points that exceeded the maximum observed age-standardized rate in the US claims data by a margin of 25% or greater were excluded from analysis.

### *Severity splits & disability weights*

The basis of the GBD disability weight survey assessments is lay descriptions of sequelae highlighting major functional consequences and symptoms. Urolithiasis is split into mild, moderate, and severe categories. The lay descriptions and disability weights for urolithiasis are shown below.

| Severity level              | Lay description                                                                                                  | DW (95% CI)          |
|-----------------------------|------------------------------------------------------------------------------------------------------------------|----------------------|
| Mild acute urolithiasis     | Has some pain in the belly that causes nausea but does not interfere with daily activities.                      | 0.011 (0.005, 0.021) |
| Moderate acute urolithiasis | Has pain in the belly and feels nauseous. The person has difficulties with daily activities.                     | 0.114 (0.078, 0.159) |
| Severe acute urolithiasis   | Has severe pain in the belly and feels nauseous. The person is anxious and unable to carry out daily activities. | 0.324 (0.220, 0.442) |

The severity distribution of urolithiasis was derived from analysis of the Medical Expenditure Panel Surveys (MEPS). MEPS is an overlapping panel survey of the non-institutionalized US population that collects data on respondents' health service interactions. Panels are initiated every year. Each panel is two years long and consists of five rounds. In 2000, MEPS began using 12-Item Short Form Surveys (SF-12) to collect data on functional health status. The SF-12 survey is administered twice per panel (about once per year).

In order to translate SF-12 scores into GBD disability weights, 62 lay descriptions for conditions representing the full range of disability weight values (from most mild to most severe) were selected. A convenience sample of respondents was then asked to complete an SF-12 form for an individual with the health state described in the lay descriptions of these conditions. Composite mental and physical SF-12 score was regressed on GBD disability weight to derive the relationship between disability weight and SF-12 score. Individual respondent scores were then regressed on reported conditions to obtain a comorbidity-corrected condition-specific disability weight. The distribution of these condition-specific weights was used to derive the proportion of individuals with the conditions that fall within each GBD severity category.

| Severity                    | Distribution         |
|-----------------------------|----------------------|
| Mild acute urolithiasis     | 0.642 (0.536, 0.734) |
| Moderate acute urolithiasis | 0.217 (0.149, 0.296) |
| Severe acute urolithiasis   | 0.141 (0.108, 0.178) |

## Modelling strategy

For GBD 2016, we modeled AU using DisMod MR 2.1, a Bayesian meta-regression modelling program. Prior settings in the DisMod model included setting remission of two weeks. We applied a crosswalk to all US claims data and hospital inpatient data to adjust to 2012 US claims data. We used the function in



DisMod-MR 2.1 to pull in cause-specific mortality rate (CSMR) data from our CODEm and CODcorrect analyses and match them with incidence data points for the same geography and study year to estimate priors on excess mortality rates (by dividing CSMR by incidence). We set bounds on location random effects for incidence due to sparse data.

Betas and exponentiated values (which can be interpreted as an odds ratio) are shown in the table below:

| Study covariate     | Parameter | beta                         | Exponentiated beta |
|---------------------|-----------|------------------------------|--------------------|
| Claims data - 2000  | Incidence | -0.51 (-0.54 — -0.47)        | 0.60 (0.58 — 0.62) |
| Claims data - 2010  | Incidence | -0.0022 (-0.0065 — -0.00017) | 1.00 (0.99 — 1.00) |
| Hospital, inpatient | Incidence | -1.76 (-1.8 — -1.74)         | 0.17 (0.17 — 0.18) |

For GBD 2016 we modelled only acute urolithiasis. Chronic urolithiasis estimates were directly derived from acute urolithiasis data in previous GBD iterations. Applying this technique for this GBD iteration would have required being able to identify acute urolithiasis episodes that repeated within an individual, which is a level of detail we currently do not estimate.

Compared to GBD 2015, major changes include inclusion of inpatient data from a greater number of geographies, estimation of the severity distribution of acute urolithiasis, and exclusion of chronic cases of urolithiasis.

# Benign Prostatic Hypertrophy (BPH)

## Flowchart

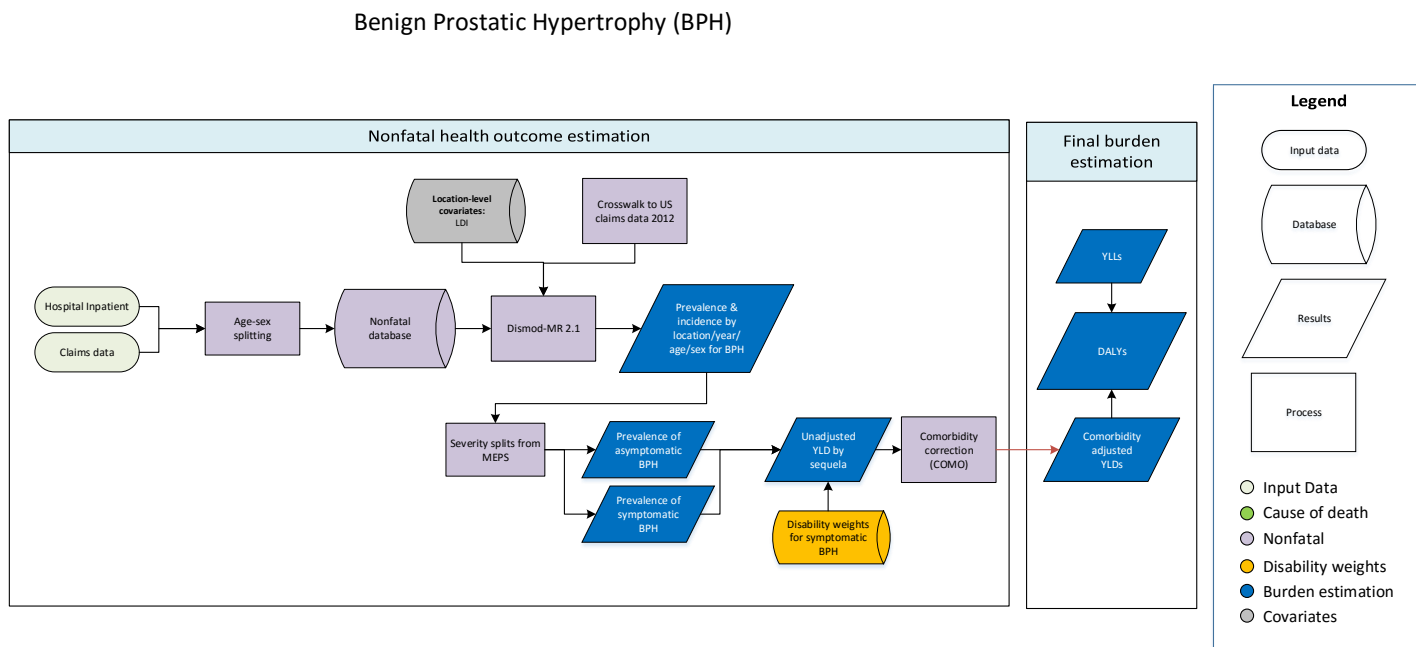

## Case definition

Benign prostatic hypertrophy (BPH) is defined as a benign proliferation of prostatic tissue, often leading to symptoms such as urinary retention, bladder outlet obstruction, or urinary tract infection.<sup>1,2</sup> The ICD codes for BPH include N40, N40.0, N40.1, N40.2, N40.3, and N40.9.

## Input data

### Model inputs

The BPH model is informed by US state-level claims data and global hospital inpatient data. US claims data from years 2000, 2010, and 2012 were included. Inpatient data that exceeded the maximum observed age-standardized rate in the US inpatient data by a margin of 25% or greater were excluded from analysis.

|                        | Prevalence |
|------------------------|------------|
| Sources                | 62         |
| Countries/subnationals | 355        |
| GBD world regions      | 15         |

### Severity splits

The basis of the GBD disability weight survey assessments are lay descriptions of sequelae highlighting major functional consequences and symptoms of a given cause. BPH is split into symptomatic and asymptomatic types. There is no disability weight (DW) assigned to asymptomatic cases of BPH. The DW associated with symptomatic BPH regards urinary frequency that is sometimes associated with pain – as seen in the table below, which offers further information.

| Severity level | Lay description                                                                                            | DW (95% CI)            |
|----------------|------------------------------------------------------------------------------------------------------------|------------------------|
| Asymptomatic   | N/A                                                                                                        | 0                      |
| Symptomatic    | Feels the urge to urinate frequently, but when passing urine it comes out slowly and sometimes is painful. | 0.067<br>(0.043–0.097) |

The proportions symptomatic and asymptomatic were derived from analysis of the Medical Expenditure Panel Surveys (MEPS). MEPS is an overlapping panel survey of the non-institutionalized US population that collects data on respondents' health service interactions. Panels are initiated every year. Each panel is two years long and consists of five rounds. In 2000, MEPS began using 12-Item Short Form Surveys (SF-12) to collect data on functional health status. The SF-12 survey is administered twice per panel (about once per year).

In order to translate SF-12 scores into GBD disability weights, 62 lay descriptions for conditions representing the full range of disability weight values (from most mild to most severe) were selected. A convenience sample of respondents was then asked to complete an SF-12 form for an individual with the health state described in the lay descriptions of these conditions. Composite mental and physical SF-12 score was regressed on GBD disability weight to derive the relationship between disability weight and SF-12 score. Individual respondent scores were then regressed on reported conditions to obtain a comorbidity-corrected condition-specific disability weight. The distribution of these condition-specific weights was used to derive the proportion of individuals with the conditions that fall within each GBD severity category.

| Severity         | Distribution        |
|------------------|---------------------|
| Asymptomatic BPH | 0.472 (0.459–0.487) |
| Symptomatic BPH  | 0.528 (0.513–0.541) |

### Modelling strategy

We ran a DisMod 2.1 model to produce estimates by age, sex, year, and location. Prior settings in the BPH DisMod 2.1 model include setting incidence and remission prior to age 40 years to 0. We set an upper bound on remission after age 40 to 0.1, corresponding to a maximum duration of 10 years. We also determined that there was no excess mortality related to BPH.

We applied a crosswalk to all US claims data to adjust to 2012 US claims data. Inpatient data was adjusted to account for multiple admissions and multiple diagnoses, based on MarketScan data, and an age-specific crosswalk was applied to adjust inpatient hospital data to 2012 US claims data. This crosswalk was

applied by comparing the ratio of prevalence indicated by 2012 US claims data to that indicated by US inpatient data and applying these age-specific adjustment factors to global inpatient hospital data. Adjustment factors and their associated standard errors are presented in the table below.

| Age start | Age end | Adjustment factor | Standard error |
|-----------|---------|-------------------|----------------|
| 40        | 44      | 21.528            | 0.402          |
| 45        | 49      | 23.031            | 0.350          |
| 50        | 54      | 10.461            | 0.244          |
| 55        | 59      | 6.718             | 0.232          |
| 60        | 64      | 5.402             | 0.195          |
| 65        | 69      | 3.951             | 0.166          |
| 70        | 74      | 3.407             | 0.132          |
| 75        | 79      | 3.172             | 0.119          |
| 80        | 84      | 2.942             | 0.098          |
| 85        | 89      | 3.004             | 0.085          |
| 90        | 94      | 3.874             | 0.092          |
| 95        | 99      | 2.601             | 0.127          |

Betas and exponentiated values (which can be interpreted as an odds ratio) are shown in the table below:

| Study covariate    | Parameter  | beta                        | Exponentiated beta |
|--------------------|------------|-----------------------------|--------------------|
| Claims data – 2000 | Prevalence | -0.016 (-0.051 – -0.0014)   | 0.98 (0.95 – 1.00) |
| Claims data – 2010 | Prevalence | -0.0047 (-0.018 – -0.00016) | 1.00 (0.98 – 1.00) |
| Mean BMI           | Prevalence | -0.04 (-0.051 – -0.028)     | 0.96 (0.95 – 0.97) |

Compared to GBD 2015, major changes include exclusion of literature data on BPH due to issues of representativeness and inconsistent case definitions, inclusion of inpatient data from a greater number of geographies, and an age-specific adjustment of inpatient hospital data to US claims data.

## Other urinary diseases

In addition to the urinary diseases described above, there are many diverse types of urinary diseases, with a range of severities and associated sequelae. Because these urinary diseases are diverse in their underlying causes and risk factors as well as in their associated health outcomes, modelling them together in a DisMod-MR model would not produce reliable estimates of prevalence or excess mortality. Instead, we calculated the YLDs caused by other congenital disorders directly using a YLD/YLL ratio.

We calculated the ratio of YLDs to YLLs across the specified urinary diseases for which nonfatal outcomes were modelled, using YLL estimates from the GBD 2016 cause of death (CoD) analysis. We then multiplied this YLD/YLL ratio by the YLL estimates for other urinary diseases from the GBD 2016 CoD analysis, providing us with an estimate of the YLDs association with other urinary diseases.

# Uterine Fibroids

## Flowchart

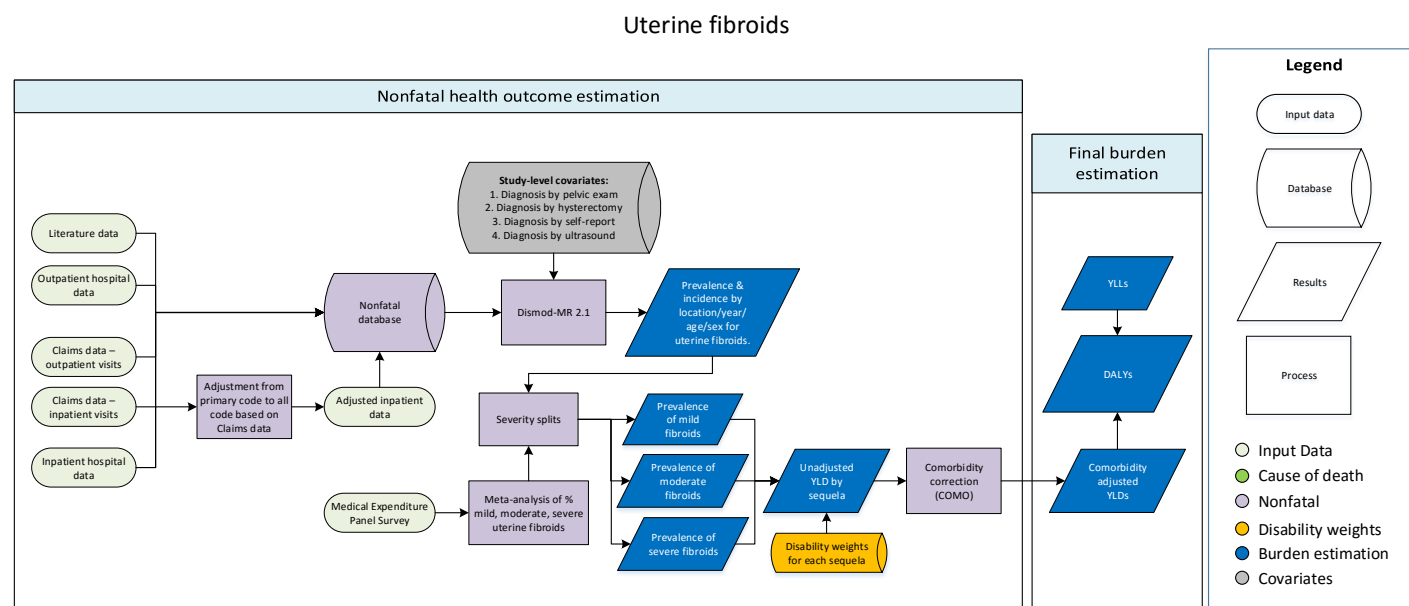

## Case definition

Uterine fibroids, also called uterine myomas or leiomyomas, are non-cancerous, compact tumors that occur in the uterus. Fibroids can be diagnosed in a number of ways, including pelvic exam, ultrasound, and hysterectomy. Our reference definition is diagnosis by pelvic exam or ultrasound because it is the most common. However, we incorporate studies that include diagnosis by self-report, pelvic exam only, ultrasound only, hysterectomy only, and all combinations of the three. Refer to the Appendix for ICD codes.

## Input data

### Model inputs

For GBD 2010, a systematic review of uterine fibroids throughout the world was conducted. Ovid MEDLINE, EMBASE, CINAHL, CAB abstracts, WHOLIS, and ISGLE database were searched. The agreed approach for uterine fibroids was to conduct a PubMed literature search every three years. A PubMed search was conducted as part of the initial review in 2010 and is next due for GBD 2017. Exclusion criteria for the initial systematic review were:

1. Studies that did not provide primary data on epidemiological parameters, e.g., a commentary piece
2. Reviews
3. Clearly non-representative studies (e.g., only high-risk pregnant women)

The table below shows the number of literature studies included in GBD 2016, as well as the number of countries or subnational units and GBD world regions represented.

|                        | Prevalence | Incidence |
|------------------------|------------|-----------|
| Studies                | 12         | 4         |
| Countries/subnationals | 16         | 17        |
| GBD world regions      | 7          | 3         |

In addition, US claims data for 2000, 2012, and 2012 by US state were included. Inpatient and outpatient hospital data were also included.

### ***Severity splits***

The basis of the GBD disability weight (DW) survey assessment are lay descriptions of sequelae highlighting major functional consequences and symptoms. The lay descriptions and disability weights for uterine fibroids are shown below. Further severity levels are calculated by combining several of these disability weights, e.g., mild abdominal pain with moderate anemia. It should be noted that anemia alone is not ascribed to fibroids, but only in conjunction with mild abdominal pain. The disability weights are listed for reference.

| Severity                     | Lay description                                                                                                                  | DW (95% CI)            |
|------------------------------|----------------------------------------------------------------------------------------------------------------------------------|------------------------|
| Abdominopelvic problem, mild | has some pain in the belly that causes nausea but does not interfere with daily activities.                                      | 0.011<br>(0.005-0.021) |
| Anemia, mild                 | feels slightly tired and weak at times, but this does not interfere with normal daily activities.                                | 0.004<br>(0.001-0.008) |
| Anemia, moderate             | feels moderate fatigue, weakness, and shortness of breath after exercise, making daily activities more difficult.                | 0.052<br>(0.034-0.076) |
| Anemia, severe               | feels very weak, tired and short of breath, and has problems with activities that require physical effort or deep concentration. | 0.149<br>(0.101-0.21)  |

To determine the proportion of women with uterine fibroids who fall into each severity level, data from the Medical Expenditure Panel Survey (MEPS) is used.

### **Modeling strategy**

The amount of data included in our model increased significantly with GBD 2015 due to the addition of US claims data and hospital data. Our DisMod MR 2.2 settings remained the same as those used in GBD 2015.

As in previous GBD iterations, incidence was set to zero prior to 15 years of age and after 51. We assume no excess mortality from uterine fibroids.

Diagnosis by either ultrasound or pelvic exam was set as the reference category. Study-level covariates for diagnosis by hysterectomy only and self-report were included.

| Study covariate           | Measure    | Parameter | beta                  | Exponentiated beta  |
|---------------------------|------------|-----------|-----------------------|---------------------|
| Hysterectomy only         | incidence  | x-cov     | -1.48 (-1.59 -- 1.37) | 0.23 (0.20 -- 0.25) |
| All MarketScan, year 2000 | Prevalence | x-cov     | -1.02 (-1.03 -- 1.01) | 0.36 (0.36 -- 0.36) |
| All MarketScan, year 2012 | Prevalence | x-cov     | -0.73 (-0.77 -- 0.69) | 0.48 (0.46 -- 0.50) |

|                           |            |       |                       |                    |
|---------------------------|------------|-------|-----------------------|--------------------|
| All MarketScan, year 2010 | Prevalence | x-cov | -0.76 (-0.79 — -0.75) | 0.47 (0.46 — 0.47) |
| Self-reported             | prevalence | x-cov | -0.23 (-0.26 — -0.22) | 0.79 (0.77 — 0.80) |

No other significant changes were made to the GBD 2015 modeling strategy.



# Polycystic Ovarian Syndrome (PCOS)

## Flowchart

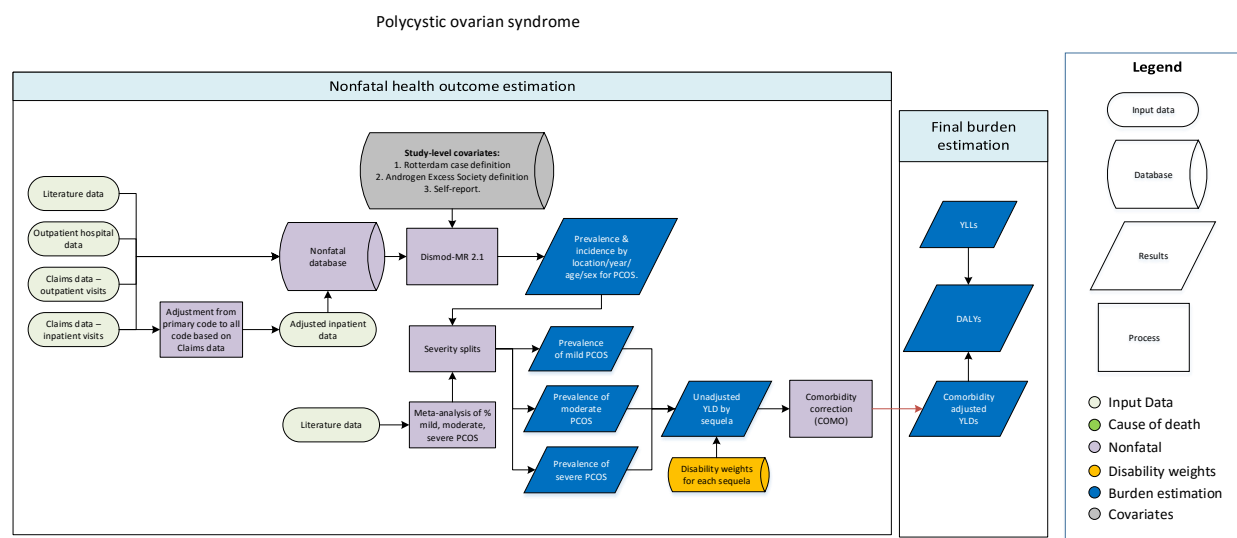

## Case definition

Polycystic ovarian syndrome (PCOS) is a condition that affects women's ovaries and can lead to a variety of symptoms. Women with PCOS often have enlarged ovaries that contain pockets of fluid, and symptoms include infrequent menstruation, excess hair growth, acne, and obesity.

## Input data

### Model inputs

For GBD 2010, a systematic review of PCOS throughout the world was conducted. Ovid MEDLINE, EMBASE, CINAHL, CAB abstracts, WHOLIS, and ISGLE database were searched. The agreed approach for PCOS was to conduct a PubMed literature search every three years. A PubMed search was conducted as part of the initial review in 2010 and is next due for GBD 2017. Exclusion criteria for the initial systematic review were:

1. Studies that did not provide primary data on epidemiological parameters, e.g., a commentary piece
2. Reviews
3. Clearly non-representative studies (e.g., only high-risk pregnant women)

The table below shows the number of literature studies included in GBD 2016, as well as the number of countries or subnational units and GBD world regions represented.

|                        | Prevalence |
|------------------------|------------|
| Studies                | 21         |
| Countries/subnationals | 17         |
| GBD world regions      | 10         |

In addition, US claims data for 2000, 2012 and 2012 by US state were included. Inpatient and outpatient hospital data were also included.

### *Severity splits*

The basis of the GBD disability weight (DW) survey assessment are lay descriptions of sequelae highlighting major functional consequences and symptoms. The lay descriptions and disability weights for premenstrual syndrome are shown below. Further severity levels are calculated by combining several of these disability weights, e.g., mild disfigurement and primary infertility.

| Severity               | Lay description                                                                                                            | DW (95% CI)            |
|------------------------|----------------------------------------------------------------------------------------------------------------------------|------------------------|
| Disfigurement, level 1 | has a slight, visible physical deformity that others notice, which causes some worry and discomfort.                       | 0.011<br>(0.005-0.021) |
| Infertility, primary   | wants to have a child and has a fertile partner, but the couple cannot conceive.                                           | 0.008<br>(0.003-0.015) |
| Infertility, secondary | has at least one child, and wants to have more children. The person has a fertile partner, but the couple cannot conceive. | 0.005<br>(0.002-0.011) |

To determine the proportion of people within each of these severity levels, one study was consulted.<sup>10</sup> Tehrani et al. included information on the proportion of women who experience primary infertility and hyperandrogenism. Percentages were combined to calculate the proportion of women who fall into both hyperandrogenism and infertility categories.

### **Modeling strategy**

The amount of data included in our model increased significantly with GBD 2016 due to the addition of US claims data and inpatient and outpatient hospital data.

The table below illustrates the study covariates, measures, parameters, beta, and exponentiated beta values.

| Study covariate           | Measure    | parameter | beta                 | Exponentiated beta    |
|---------------------------|------------|-----------|----------------------|-----------------------|
| All MarketScan, year 2000 | Prevalence | x-cov     | -2.51 (-2.55 – -2.5) | 0.081 (0.078 – 0.082) |
| All MarketScan, year 2010 | Prevalence | x-cov     | -1.41 (-1.44 – -1.4) | 0.24 (0.24 – 0.25)    |
| All MarketScan, year 2012 | Prevalence | x-cov     | -1.41 (-1.44 – -1.4) | 0.25 (0.24 – 0.25)    |

<sup>10</sup> Tehrani FR, Simbar M, Tohidi M, Hosseinpanah F, Azizi F. The prevalence of polycystic ovary syndrome in a community sample of Iranian population: Iranian PCOS prevalence study. *Reprod Biol Endocrinol*. 2011; 9: 39.

|                                         |                       |               |                         |                    |
|-----------------------------------------|-----------------------|---------------|-------------------------|--------------------|
| Androgen Excess Society case definition | Prevalence            | z-cov         | 0.47 (0.033 – 0.96)     | 1.59 (1.03 – 2.61) |
| Rotterdam case definition               | Prevalence            | x-cov         | 0.31 (0.21 – 0.40)      | 1.36 (1.23 – 1.49) |
| Self-report                             | prevalence            | z-cov         | 0.48 (0.11 – 0.96)      | 1.62 (1.12 – 2.62) |
| Hospital Inpatient                      | Prevalence            | x-cov         | -0.99 (-1.13 – -0.86)   | 0.37 (0.32 – 0.42) |
| Healthcare access and quality index     | Excess mortality rate | Country-level | -0.043 (-0.05 – -0.034) | 0.96 (0.95 – 0.97) |

As in previous GBD iterations, incidence was set to zero prior to 15 years of age and after 50. This is because a woman must enter puberty before she can get PCOS, and the condition spontaneously goes into remission with the onset of menopause.

Case definitions for PCOS vary widely, including varying rosters of symptoms over various time periods. We use as our reference definition the NIH/NICHD criteria, for which three signs must be present: clinical or biochemical evidence of hyperandrogenism, oligomenorrhea, and the exclusion of other disorders. We include study-level covariates for other common case definitions, including the Rotterdam and Androgen Excess Society (AES) definitions, as well as self-report.

No significant changes took place for GBD 2016.

# Endometriosis

## Flowchart

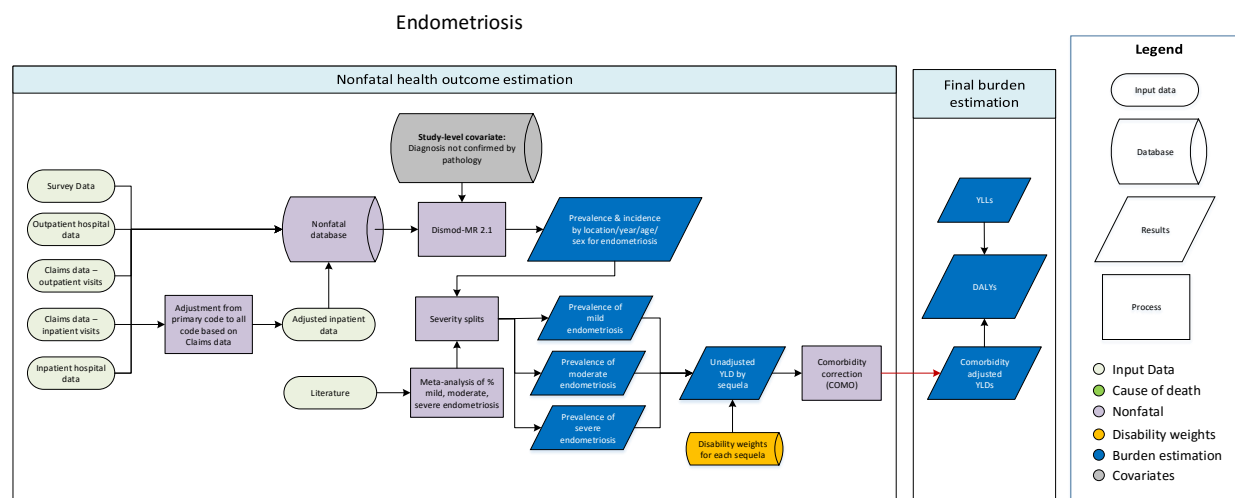

## Case definition

Endometriosis is defined as growth of tissue that usually lies inside the uterus outside of it. Common symptoms include chronic pain and infertility. Our reference case definition of endometriosis is diagnosis accompanied by pathological confirmation.

## Input data

### Model inputs

For GBD 2010, a systematic review of endometriosis throughout the world was conducted. Ovid MEDLINE, EMBASE, CINAHL, CAB abstracts, WHOLIS, and ISGLE database were searched. The agreed approach for endometriosis was to conduct a PubMed literature search every three years. A PubMed search was conducted as part of the initial review in 2010. Exclusion criteria for the initial systematic review were:

1. Studies that did not provide primary data on epidemiological parameters, e.g., a commentary piece
2. Reviews
3. Clearly non-representative studies (e.g., only high-risk pregnant women)

The table below shows the number of literature studies included in GBD 2016, as well as the number of countries or subnational units and GBD world regions represented.

|                        | Prevalence | Incidence |
|------------------------|------------|-----------|
| Studies                | 7          | 10        |
| Countries/subnationals | 7          | 8         |
| GBD world regions      | 4          | 2         |

In addition, US claims data for 2000, 2012 and 2012 by US state were included. Inpatient and outpatient hospital data were also included.

### *Severity splits & disability weights*

The basis of the GBD disability weight (DW) survey assessment are lay descriptions of sequelae highlighting major functional consequences and symptoms. The lay descriptions and disability weights for endometriosis are shown below. Further severity levels are calculated by combining several of these disability weights, e.g., moderate abdominal pain and secondary infertility.

| Severity                         | Lay description                                                                                                            | DW (95% CI)            |
|----------------------------------|----------------------------------------------------------------------------------------------------------------------------|------------------------|
| Abdominopelvic problem, mild     | has some pain in the belly that causes nausea but does not interfere with daily activities.                                | 0.011<br>(0.005-0.021) |
| Abdominopelvic problem, moderate | has pain in the belly and feels nauseous. The person has difficulties with daily activities.                               | 0.114<br>(0.078-0.159) |
| Abdominopelvic problem, severe   | has severe pain in the belly and feels nauseous. The person is anxious and unable to carry out daily activities.           | 0.324<br>(0.219-0.442) |
| Infertility, primary             | wants to have a child and has a fertile partner, but the couple cannot conceive.                                           | 0.008<br>(0.003-0.015) |
| Infertility, secondary           | has at least one child, and wants to have more children. The person has a fertile partner, but the couple cannot conceive. | 0.005<br>(0.002-0.011) |

To determine the proportion of people within each of these severity levels, three studies were consulted (ALWHS YEAR; Sinaii et al. 2002 & 2008). One addressed the proportion of women who become infertile, one addressed the proportion with chronic abdominal pain, and the last one severity of abdominal pain. Estimates were combined across studies to calculate the proportion of women who fall into both abdominal pain and infertility categories.

### **Modeling strategy**

We use DisMod-MR 2.2, a Bayesian meta-regression epidemiological model, to generate estimates for Endometriosis by age, sex, year, and country. The amount of data included in our model increased significantly with GBD 2015 due to the addition of US claims data and hospital data.

Diagnosis confirmed by pathology was set as the reference definition. In addition to study-level covariate on diagnosis not confirmed by pathology, study-level covariates were added for each year of US claims data as well as inpatient and outpatient hospital data. The table below illustrates covariates, measures, parameters, beta, and exponentiated beta values.

| Study covariate                          | Measure    | Parameter | beta                  | Exponentiated beta |
|------------------------------------------|------------|-----------|-----------------------|--------------------|
| Endometriosis not confirmed by pathology | incidence  | x-cov     | -0.56 (-0.9 – -0.23)  | 0.57 (0.41 – 0.80) |
| All MarketScan, year 2000                | prevalence | x-cov     | -1.5 (-1.96 – -0.96)  | 0.21 (0.14 – 0.37) |
| All MarketScan, year 2010                | prevalence | x-cov     | -1.54 (-1.98 – -0.99) | 0.92 (0.85 – 0.99) |

|                                     |                       |               |                         |                    |
|-------------------------------------|-----------------------|---------------|-------------------------|--------------------|
| All MarketScan, year 2012           | prevalence            | x-cov         | . -1.55 (-1.99 – -0.99) | 0.21 (0.14 – 0.37) |
| Hospital inpatient                  | prevalence            | x-cov         | -1.13 (-1.61 – -0.58)   | 0.32 (0.20 – 0.56) |
| Healthcare access and quality index | Excess mortality rate | Country-level | -0.02 (-0.02 – -0.02)   | 0.98 (0.98 – 0.98) |

As in previous GBD iterations, incidence was set to zero prior to 15 years of age and after 51. This is because a woman must enter puberty before she can get endometriosis, and the condition spontaneously goes into remission with the onset of menopause.

There have been no additional significant changes to the modeling strategy for GBD 2016.

# Genital Prolapse

## Flowchart

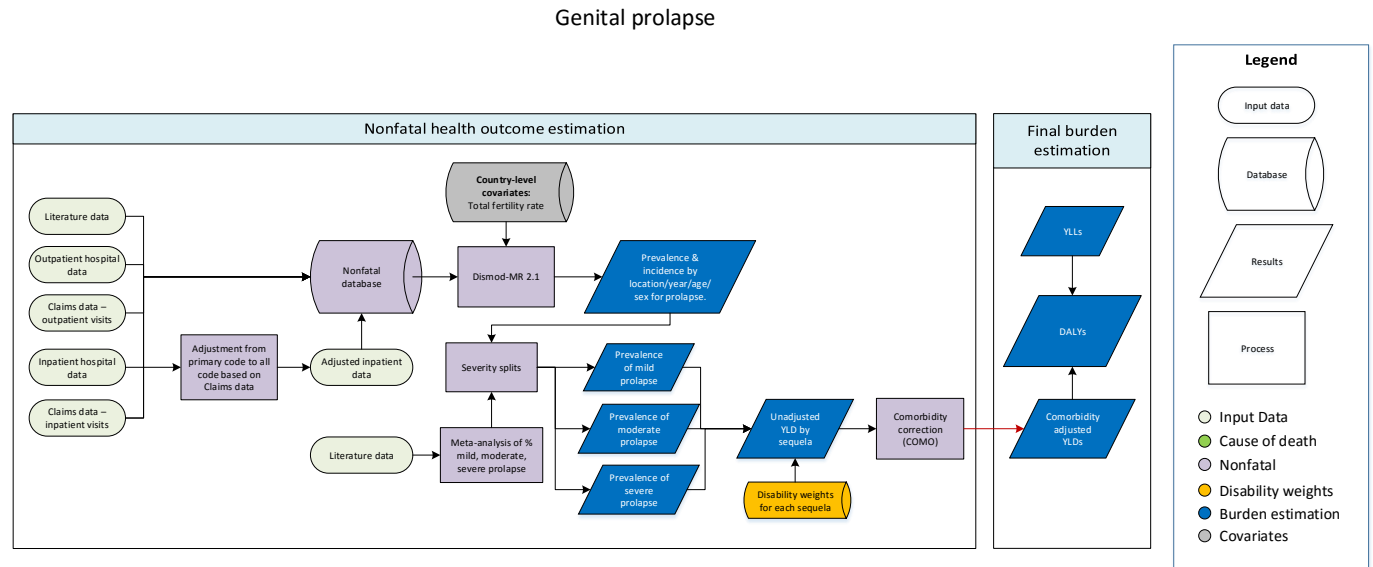

### Case definition

Genital prolapse, also called female pelvic organ prolapse, is the clinically relevant descent of one of more of the pelvic structures, including the uterus, bladder, rectum, small or large bowel, or vagina. Risk of prolapse increases with age, and can be exacerbated by vaginal childbirth or physical strain. ICD codes associated with genital prolapse include: N81.

### Input data

#### Model inputs

For GBD 2010, a systematic review of genital prolapse throughout the world was conducted. Ovid MEDLINE, EMBASE, CINAHL, CAB abstracts, WHOLIS, and ISGLE database were searched. The agreed approach for genital prolapse was to conduct a PubMed literature search every three years. A PubMed search was conducted as part of the initial review in 2010 and is next due for GBD 2017. Exclusion criteria for the initial systematic review were:

1. Studies that did not provide primary data on epidemiological parameters, e.g., a commentary piece
2. Reviews
3. Clearly non-representative studies (e.g., only high-risk pregnant women)

The table below shows the number of literature studies included in GBD 2016, as well as the number of countries or subnational units and GBD world regions represented.

|  |            |
|--|------------|
|  | Prevalence |
|--|------------|

|                        |    |
|------------------------|----|
| Studies                | 13 |
| Countries/subnationals | 12 |
| GBD world regions      | 8  |

In addition, US claims data for 2000, 2010 and 2012 by US state were included. Outpatient and inpatient hospital data were also included.

### *Severity splits*

The basis of the GBD disability weight (DW) survey assessment are lay descriptions of sequelae highlighting major functional consequences and symptoms. The lay descriptions and disability weights for genital prolapse are shown below. Further severity levels are calculated by combining several of these disability weights, e.g., mild abdominal pain and stress incontinence.

| Severity                     | Lay description                                                                                                | DW (95% CI)            |
|------------------------------|----------------------------------------------------------------------------------------------------------------|------------------------|
| Stress incontinence          | loses small amounts of urine without meaning to when coughing, sneezing, laughing or during physical exercise. | 0.02<br>(0.011-0.035)  |
| Abdominopelvic problem, mild | has some pain in the belly that causes nausea but does not interfere with daily activities.                    | 0.011<br>(0.005-0.021) |

To determine the proportion of people within each of these severity levels, two studies were consulted.<sup>11, 12</sup> Scherf and Sliker-Ten Hove included information on the proportion of women with prolapse who experience a bulging sensation as well as stress incontinence. Percentages were combined to calculate the proportion of women who fall into both stress incontinence and bulging sensation categories.

### **Modeling strategy**

The amount of data included in our model increased significantly with GBD 2015 due to the addition of US claims data. Our DisMod MR 2.2 settings remained the same as GBD 2015.

As in previous GBD iterations, incidence was set to zero prior to 15 years of age. This is because it is highly unlikely a woman would experience genital prolapse before entering her childbearing years.

This year we have added covariates for each year of the US claims data as well as the inpatient hospital data. The table below illustrates covariates, measures, parameters, beta, and exponentiated beta values.

| Study covariate           | Measure    | Parameter | beta               | Exponentiated beta  |
|---------------------------|------------|-----------|--------------------|---------------------|
| All MarketScan, year 2000 | prevalence | x-cov     | -1.99 (-2 -- 1.99) | 0.14 (0.14 -- 0.14) |
| All MarketScan, year 2010 | prevalence | x-cov     | -1.99 (-2 -- 1.97) | 0.14 (0.14 -- 0.14) |
| All MarketScan, year 2012 | prevalence | x-cov     | -1.99 (-2 -- 1.96) | 0.14 (0.14 -- 0.14) |

<sup>11</sup> Epidemiology of pelvic organ prolapse in rural Gambia, West Africa. Scherf, 2002.

<sup>12</sup> Symptomatic pelvic organ prolapse and possible risk factors in a general population. Sliker-Ten Howe, 2009.



|                      |            |                            |                           |                     |
|----------------------|------------|----------------------------|---------------------------|---------------------|
|                      |            |                            |                           |                     |
| Hospital Inpatient   | Prevalence | x-cov                      | -2.17 (-2.33 — -<br>2.08) | 0.11 (0.097 — 0.13) |
| Total fertility rate | prevalence | Country-level<br>covariate | 0.99 (0.97 —<br>1.00)     | 2.69 (2.63 — 2.72)  |

No other significant changes to modeling strategy were made for GBD 2016.

# Premenstrual Syndrome (PMS)

## Flowchart

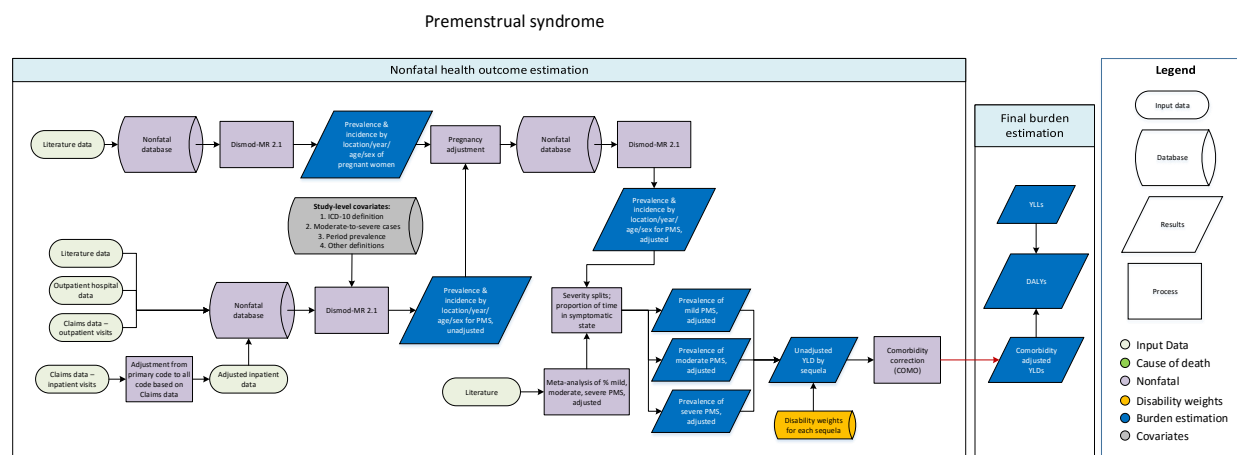

## Case definition

Premenstrual syndrome refers to psychological and physical symptoms that occur in the weeks leading up to a woman's period in her menstrual cycle. Symptoms are extremely varied in nature and severity, but include tenderness, bloating, irritability, fatigue, abdominal pain, and altered mental states. Symptoms cease when a woman is pregnant and once she reaches menopause.

## Input data

### Model inputs

For GBD 2010, a systematic review of premenstrual syndrome throughout the world was conducted. Ovid MEDLINE, EMBASE, CINAHL, CAB abstracts, WHOLIS, and ISGLE database were searched. The agreed approach for premenstrual syndrome was to conduct a PubMed literature search every three years. A PubMed search was conducted as part of the initial review in 2010 and is next due for GBD 2017. Exclusion criteria for the initial systematic review were:

1. Studies that did not provide primary data on epidemiological parameters, e.g., a commentary piece
2. Reviews
3. Clearly non-representative studies (e.g., only high-risk pregnant women)

The table below shows the number of literature studies included in GBD 2015, as well as the number of countries or subnational units and GBD world regions represented. Note that data on the proportion of women who are pregnant is used during the pregnancy adjustment, described in detail in the modeling strategy section.

## PMS

|  |            |
|--|------------|
|  | Prevalence |
|--|------------|

|                        |    |
|------------------------|----|
| Studies                | 50 |
| Countries/subnationals | 43 |
| GBD world regions      | 11 |

#### Women who are pregnant

|                        |            |
|------------------------|------------|
|                        | Prevalence |
| Studies                | 2          |
| Countries/subnationals | 188        |
| GBD world regions      | 21         |

Inpatient hospital data was not incorporated, as we believed that inpatient data on PMS would fluctuate wildly with across geographies and different coding practices, and would not represent the true prevalence of PMS in the population.

#### *Severity splits and disability weights*

The basis of the GBD disability weight (DW) survey assessment are lay descriptions of sequelae highlighting major functional consequences and symptoms. The lay descriptions and disability weights for premenstrual syndrome are shown below. Further severity levels are calculated by combining several of these disability weights, e.g., abdominal pain and depression due to premenstrual syndrome.

| Severity                                | Lay description                                                                                                                                                                                                 | DW (95% CI)            |
|-----------------------------------------|-----------------------------------------------------------------------------------------------------------------------------------------------------------------------------------------------------------------|------------------------|
| Major depressive disorder, mild episode | feels persistent sadness and has lost interest in usual activities. The person sometimes sleeps badly, feels tired, or has trouble concentrating but still manages to function in daily life with extra effort. | 0.145<br>(0.099-0.209) |
| Abdominopelvic problem, mild            | has some pain in the belly that causes nausea but does not interfere with daily activities.                                                                                                                     | 0.011<br>(0.005-0.021) |

To determine the proportion of people within each of these severity levels, five studies were consulted. Three studies addressed the proportion of women with PMS who experience depression, and two other studies addressed the proportion of women with PMS who experience abdominal pain. Estimates were pooled across studies to get final proportions, and were combined across studies to calculate the proportion of women who fall into both abdominal pain and depression categories.

#### **Modeling strategy**

Our DisMod MR 2.2 settings remained the same as those used in GBD 2015 and, no new data was added for GBD 2016.

As in previous GBD iterations, incidence was set to zero prior to 15 years of age and after 50. This is because a woman must enter puberty before she can get premenstrual syndrome, and the condition spontaneously goes into remission with the onset of menopause. We assume no excess mortality from PMS.

Case definitions for PMS vary widely, including varying rosters of symptoms over various time periods. We use as our reference definition the American College of Obstetricians and Gynecologists (ACOG) criteria, which states that the patient reports at least one of each of the following affective and somatic symptoms during the five days before their menses and appear in three consecutive cycles: depression, angry outbursts, irritability, anxiety, confusion, social withdrawal; breast tenderness, abdominal bloating, headache, or swelling of extremities. We include study-level covariates for other common case definitions, including the ICD-10 definition, and the Premenstrual Symptoms Screening Tool (PSST) definition. We also include covariates for studies that only examine moderate to severe PMS, or period prevalence of PMS.

## Other gynaecological conditions

### Flowchart

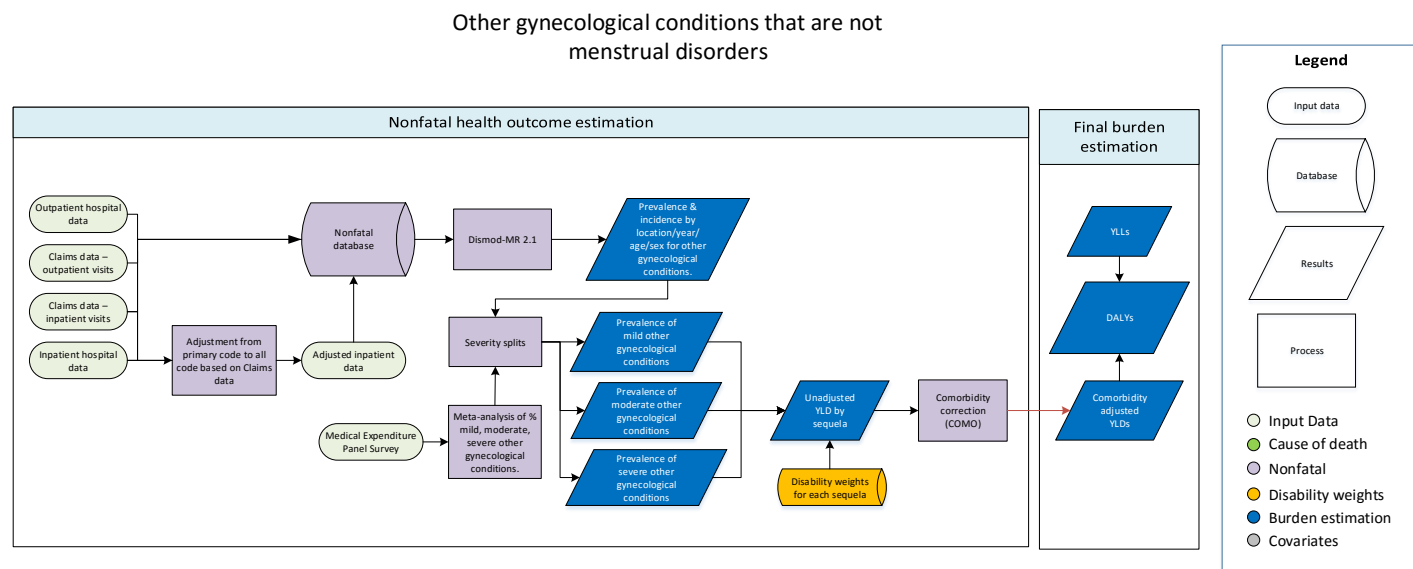

### Case definition

Other gynaecological conditions encompasses all disorders that are not menstruation- or bleeding-related that do not fall under the heading of any of the other gynaecological causes. They only affect women.

### Input data

#### *Model inputs*

No literature data are used to inform models of other gynaecological conditions. Previously, only inpatient and outpatient hospital data were used. For GBD 2015, US claims data for 2000, 2012 and 2012 by US state were added.

#### *Severity splits & disability weights*

The basis of the GBD disability weight (DW) survey assessment are lay descriptions of sequelae highlighting major functional consequences and symptoms. The lay descriptions and disability weights for other gynaecological conditions are shown below.

| Severity                         | Lay description                                                                                                   | DW (95% CI)            |
|----------------------------------|-------------------------------------------------------------------------------------------------------------------|------------------------|
| Abdominopelvic problem, mild     | has some pain in the belly that causes nausea but does not interfere with daily activities.                       | 0.011<br>(0.005–0.021) |
| Abdominopelvic problem, moderate | has pain in the belly and feels nauseated. The person has difficulties with daily activities.                     | 0.114<br>(0.078–0.159) |
| Abdominopelvic problem, severe   | has severe pain in the belly and feels nauseated. The person is anxious and unable to carry out daily activities. | 0.324<br>(0.219–0.442) |
| Anaemia, mild                    | feels slightly tired and weak at times, but this does not interfere with normal daily activities.                 | 0.004<br>(0.001–0.008) |

|                   |                                                                                                                                  |                        |
|-------------------|----------------------------------------------------------------------------------------------------------------------------------|------------------------|
| Anaemia, moderate | feels moderate fatigue, weakness, and shortness of breath after exercise, making daily activities more difficult.                | 0.052<br>(0.034–0.076) |
| Anaemia, severe   | feels very weak, tired and short of breath, and has problems with activities that require physical effort or deep concentration. | 0.149<br>(0.101–0.21)  |

To determine the proportion of women with endometriosis who fall into each severity level, data from the Medical Expenditure Panel Survey (MEPS) are used.

### Modelling strategy

We ran a DisMod MR 2.1 model to estimate the global burden of gynaecological diseases. The amount of data included in our model increased significantly with GBD 2015 due to the addition of US claims data. Many of our DisMod MR 2.1 settings remained the same, but new study-level covariates were added to accommodate the new data. These covariates are shown in the table below, along with measures, parameters, beta, and exponentiated beta values.

| Study covariate           | Measure    | Parameter | beta                  | Exponentiated beta    |
|---------------------------|------------|-----------|-----------------------|-----------------------|
| All MarketScan, year 2000 | Prevalence | x-cov     | 4.00 (4.00 – 4.00)    | 54.52 (54.43 – 54.60) |
| All MarketScan, year 2010 | prevalence | x-cov     | 3.99 (3.98 – 4.00)    | 54.30 (53.57 – 54.60) |
| All MarketScan, year 2012 | Prevalence | x-cov     | 3.99 (3.97 – 4.00)    | 53.86 (52.83 – 54.54) |
| Hospital inpatient        | prevalence | x-cov     | -1.96 (-2.17 – -1.76) | 0.14 (0.11 – 0.17)    |

As in previous GBD iterations, incidence was set to zero prior to 15 years of age. We assume no excess mortality from other gynecological conditions over the same age range.

No other significant changes were made to the GBD 2016 estimation process.

# Endocrine, Metabolic, Blood and Immune Disorders

## Flowchart

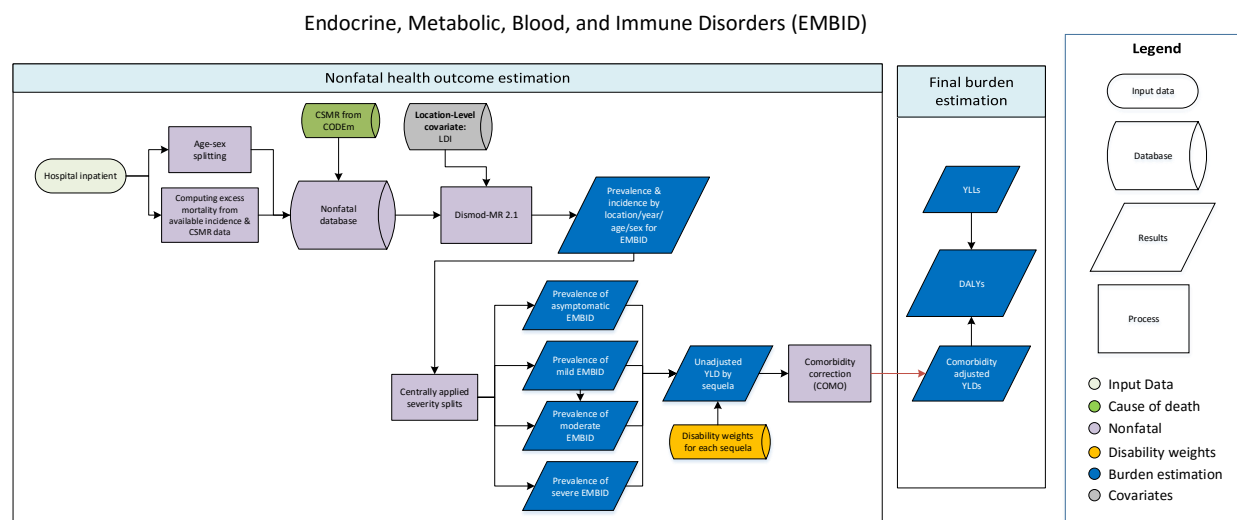

## Case definition

Endocrine, metabolic, blood, and immune disorders (EMBIG) is a residual cause consisting of conditions that do not map to other causes within the diabetes, urogenital, blood and endocrine disease hierarchy. This residual group consists mainly of thyroid disorders, rare metabolic and immune disorders, and blood disorders not resulting in anaemia. From the ICD chapter on Endocrine, Metabolic, and Immune Disorders (the E chapter) GBD's definition of EMBID excludes the codes for nutritional deficiencies, diabetes and anaemia which are modelled as separate causes; as well as those for obesity and hypercholesterolemia which are modeled as risks, not causes.

ICD 10 codes for EMBID include: D64.4, D64.8, D68-D68.6, D68.8-D68.9, D69-D69.4, D69.6, D69.8, D70-D70.4, D70.8-D70.9, D72-D72.1, D72.8-D72.9, D73-D73.5, D73.8-D73.9, D74.0, D74.8-D74.9, D75-D75.2, D75.8-D75.9, D76-D76.3, D80-D80.9, D81-D81.9, D82-D82.4, D82.8-D82.9, D83-D83.2, D83.8-D83.9, D84-D84.1, D84.8-D84.9, D86.8, D89-D89.3, D89.8-D89.9, E03-E03.1, E03.3-E03.5, E03.8-E03.9, E04-E04.2, E04.8-E04.9, E05-E05.5, E05.8-E05.9, E06-E06.3, E06.5, E06.9, E07-E07.1, E07.8-E07.9, E16.1-E16.4, E16.8-E16.9, E20-E20.1, E20.8-E20.9, E21-E21.5, E22-E22.2, E22.8-E22.9, E23.0, E23.2-E23.3, E23.6-E23.7, E24-E24.1, E24.3-E24.4, E24.8-E24.9, E25.0, E25.8-E25.9, E26-E26.1, E26.8-E26.9, E27-E27.2, E27.4-E27.5, E27.8-E27.9, E28-E28.1, E28.3, E28.8-E28.9, E29-E29.1, E29.8-E29.9, E30-E30.1, E30.8-E30.9, E31-E31.2, E31.8-E31.9, E32-E32.1, E32.8-E32.9, E34-E34.5, E34.8-E34.9, E67-E67.3, E67.8, E70-E70.5, E70.8-E70.9, E71-E71.5, E72-E72.5, E72.8-E72.9, E73-E73.1, E73.8-E73.9, E74-E74.4, E74.8-E74.9, E75-E75.6, E76-E76.3, E76.8-E76.9, E77-E77.1, E77.8-E77.9, E79-E79.2, E79.8-E79.9, E80-E80.7, E83-E83.9, E84-E84.9, E85-E85.9, E88-E88.9.

## Input data

### *Model inputs*

The EB MID model is informed by global hospital inpatient data. Global inpatient data points that exceeded the maximum observed age-standardized rate in the US inpatient data by a margin of 25% or greater were excluded from analysis.

The table below shows the number of countries and GBD world regions represented.

|                        | Prevalence |
|------------------------|------------|
| Countries/subnationals | 125        |
| GBD world regions      | 14         |

### *Severity splits & disability weights*

The basis of the GBD disability weight survey assessments is lay descriptions of sequelae highlighting major functional consequences and symptoms. EMBID is split into asymptomatic, mild, moderate, and severe categories. The lay descriptions and disability weights for EMBID are shown below.

| Severity level                                                 | Lay description                                                                                                       | DW (95% CI)            |
|----------------------------------------------------------------|-----------------------------------------------------------------------------------------------------------------------|------------------------|
| Asymptomatic endocrine, metabolic, blood, and immune disorders | --                                                                                                                    | --                     |
| Mild endocrine, metabolic, blood, and immune disorders         | Has low energy and feels cold.                                                                                        | 0.019<br>(0.01–0.032)  |
| Moderate endocrine, metabolic, blood, and immune disorders     | Feels nervous, has palpitations, sweats a lot, and has difficulty sleeping.                                           | 0.145<br>(0.096–0.202) |
| Severe endocrine, metabolic, blood, and immune disorders       | Easily bruises and sometimes bleeds from the gums and nose; feels weak and has some difficulty with daily activities. | 0.159<br>(0.106–0.226) |

The severity distribution of EMBID was derived from analysis of the Medical Expenditure Panel Surveys (MEPS). MEPS is an overlapping panel survey of the non-institutionalized US population that collects data on respondents' health service interactions. Panels are initiated every year. Each panel is two years long and consists of five rounds. In 2000, MEPS began using 12-Item Short Form Surveys (SF-12) to collect data on functional health status. The SF-12 survey is administered twice per panel (about once per year).

In order to translate SF-12 scores into GBD disability weights, 62 lay descriptions for conditions representing the full range of disability weight values (from most mild to most severe) were selected. A convenience sample of respondents was then asked to complete an SF-12 form for an individual with the health state described in the lay descriptions of these conditions. Composite mental and physical SF-12 score was regressed on GBD disability weight to derive the relationship between disability weight and SF-12 score. Individual respondent scores were then regressed on reported conditions to obtain a comorbidity-corrected condition-specific disability weight. The distribution of these condition-specific



weights was used derive the proportion of individuals with the conditions that fall within each GBD severity category.

| Severity                                                       | Distribution         |
|----------------------------------------------------------------|----------------------|
| Asymptomatic endocrine, metabolic, blood, and immune disorders | 0.410 (0.398, 0.423) |
| Mild endocrine, metabolic, blood, and immune disorders         | 0.387 (0.328, 0.430) |
| Moderate endocrine, metabolic, blood, and immune disorders     | 0.061 (0.042, 0.060) |
| Severe endocrine, metabolic, blood, and immune disorders       | 0.142 (0.115, 0.173) |

### Modelling strategy

We ran a DisMod MR-2.1 model to produce estimates by age, sex, year, and location. Prior settings in the EMBID DisMod model include an upper bound on remission of 0.25, corresponding to a maximum duration of four years. We used the function in DisMod-MR 2.1 to pull in cause-specific mortality rate (CSMR) data from our CODEm and CODcorrect analyses and match them with incidence data points for the same geography and study year to estimate priors on excess mortality rates (by dividing CSMR by incidence).

We included the covariate Lagged Distributed Income (LDI) as a country-level covariate to inform excess mortality, with bounds of -0.5, -0.1.

Compared to GBD 2015, major changes include inclusion of inpatient data from a greater number of geographies and placing bounds on remission to reflect the chronic nature of many conditions within the endocrine, metabolic, blood, and immune disorders cause grouping.

# Rheumatoid arthritis

## Flowchart

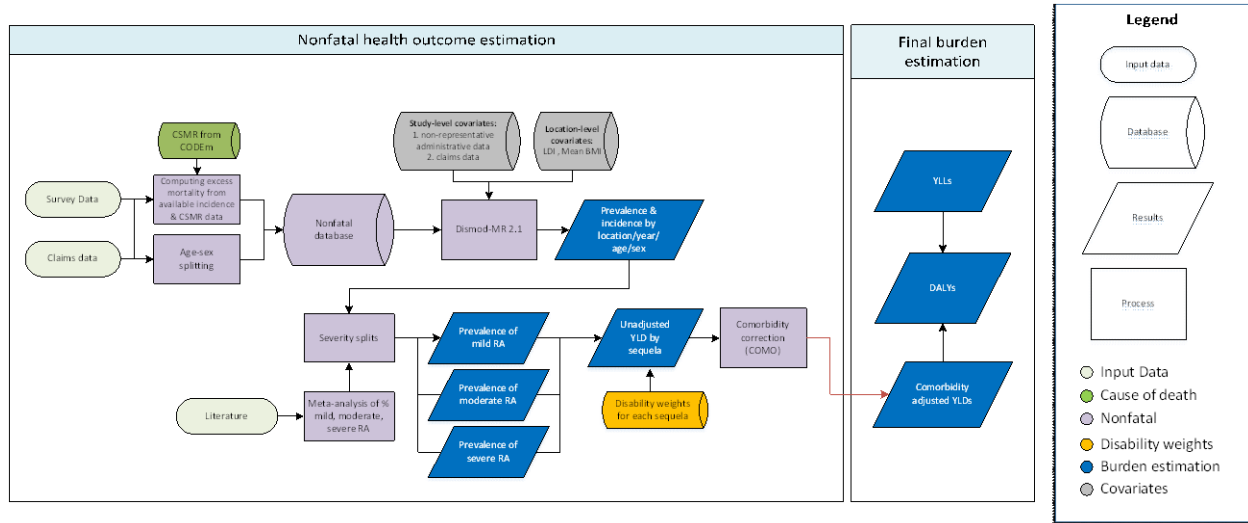

## Case definition

Rheumatoid arthritis (RA) is a systemic autoimmune disorder that causes pain and swelling of the joints. While RA is known to affect internal organs in addition to the joints, these extra-articular effects are not factored into the disability weights (DW) used in GBD. The reference case definition for rheumatoid arthritis is based on the 1987 criteria by the American College of Rheumatology (ACR 1987)<sup>1</sup> which stipulate seven diagnostic criteria, of which four need to be satisfied for a diagnosis. Criteria 1 through 4 must have been present for at least six weeks (see table below). For RA, ICD-10 codes are M05, M06, and M08 and ICD-9 codes are 714.0–714.9.

## Input data

### Model inputs

For GBD 2010, a systematic review of the prevalence of RA throughout the world was conducted. Ovid MEDLINE, EMBASE, CINAHL, CAB abstracts, WHOLIS, and SIGLE databases were searched using the following search terms: (rheumatoid arthritis OR rheumatic disease\* OR rheumatism) AND (prevalen\* OR inciden\* OR cross-sectional OR cross sectional OR epidemiol\* OR survey OR population-based OR population based OR population study OR population sample OR cohort OR follow-up OR follow up OR longitudinal OR regist\* OR data collection).

The exclusion criteria were:

48. Studies clearly not representative of the national population
49. Studies that were not population-based, eg, hospital or clinic-based studies
50. Studies that did not provide primary data on epidemiological parameters, eg, a commentary piece

- 51. Studies of a specific type of RA, eg, seropositive RA
- 52. Studies with a sample size of less than 150
- 53. Reviews

The most recent PubMed search was conducted in GBD 2013 using the above search terms. Opportunistically, we added scientific literatures and population surveys encountered for GBD 2015 and GBD 2016. The table below shows the number of literature studies included in GBD 2016, as well as the number of countries or subnational units and GBD world regions represented.

|                        | Prevalence | Incidence | Mortality risk |
|------------------------|------------|-----------|----------------|
| Studies                | 68         | 25        | 25             |
| Countries/subnationals | 91         | 16        | 16             |
| GBD world regions      | 16         | 6         | 3              |

In addition, data from US claims data for 2000, 2010, and 2012 by US state were included. We decided not to use hospital inpatient data as we considered they would not be representative of true prevalence and that variation between countries in the proportion of true prevalent cases captured in hospital inpatient data systems would likely vary more than can be captured by a single crosswalk in DisMod-MR 2.1. We compared the rates of RA in the outpatient data from Norway, Sweden, Canada, and the USA and found implausibly large differences with the rates from the claims data. The US outpatient rates were half the value of the claims data and those for the other countries much lower still. For those reasons we decided not to use the outpatient data.

#### *Severity splits*

The basis of the GBD disability weight survey assessments are lay descriptions of sequelae highlighting major functional consequences and symptoms. The lay descriptions and disability weights for RA severity levels are shown below.

| Severity level | Lay description                                                                                                                                                                                                                                     | DW (95% CI)         |
|----------------|-----------------------------------------------------------------------------------------------------------------------------------------------------------------------------------------------------------------------------------------------------|---------------------|
| Mild           | This person has moderate pain and stiffness in the arms and hands which causes difficulty lifting, carrying, and holding things, and trouble sleeping because of the pain.                                                                          | 0.117 (0.080–0.163) |
| Moderate       | This person has pain and deformity in most joints, causing difficulty moving around, getting up and down, and using the hands for lifting and carrying. The person often feels fatigue.                                                             | 0.317 (0.216–0.440) |
| Severe         | This person has severe, constant pain, and deformity in most joints, causing difficulty moving around, getting up and down, eating, dressing, lifting, carrying, and using the hands. The person often feels sadness, anxiety, and extreme fatigue. | 0.581 (0.403–0.739) |

To determine the proportion of people with RA within each of the severity levels, seven studies from three regions provided information on the severity of RA. Severity was classified according to Health Assessment Questionnaire scores, with the cutoff scores for each severity level: <1 mild; 1–1.875

moderate; and  $\geq 2$  severe. Estimates were pooled across studies. We used a random effects meta-analysis model. The pooled percentages were mild 48.8% (37.9–59.6), moderate 37.6% (29.3–46.2) and severe 12.2% (7.8–17.4). After streaming out 1,000 draws assuming a binomial distribution, percentages were scaled to sum to 1 at each draw.

## Modelling strategy

Prior settings in the DisMod model included setting remission to 0.009-0.021, and it was assumed that there was no incidence or prevalence of RA before the age of 5 years.

Data from all sources were re-extracted to better reflect the range of case definitions. We set the American College of Rheumatology (ACR) 1987 criteria<sup>1</sup> as the reference. We marked studies using the Rome 1961,<sup>2</sup> American Rheumatology Association (ARA) 1958,<sup>3</sup> or European League against Rheumatism (EULAR)<sup>4</sup> criteria with a single study covariate “non-ACR\_1987” as there were inadequate studies with each alternative classification system to do separate crosswalks.

Additional study covariates were created for studies using administrative health system data sources; for studies covering regional rather than (sub)-nationally representative populations; and for claims data.

We used the function in DisMod-MR 2.1 to pull in cause-specific mortality rate (CSMR) data from our CODEm and CODcorrect analyses and match it with prevalence data points for the same geography and study year to estimate priors on excess mortality rates (by dividing CSMR by prevalence). In GBD 2016, CSMR data include the age groups 80-84, 85-89, 90-94, and 95+ years.

We retained just two RA diagnosis criteria and three years of claims data as x-cov (ie, based on a significant coefficient indicating evidence of a systematic bias). Betas and exponentiated values (which can be interpreted as an odds ratio) for these covariates are shown in the table below:

| Study covariate                 | Parameter  | beta    | Exponentiated beta |
|---------------------------------|------------|---------|--------------------|
| RA criteria other than ACR 1987 | Prevalence | -0.81   | 0.45 (0.39 – 0.52) |
| RA diagnosis from admin data    | Prevalence | -0.041  | 0.96 (0.92 – 1.00) |
| Claims data - 2000              | Prevalence | -0.26   | 0.77 (0.75 – 0.80) |
| Claims data - 2010              | Prevalence | -0.03   | 0.97 (0.95 – 0.99) |
| Claims data - 2012              | Prevalence | -0.0028 | 1.00 (0.99 – 1.00) |

The non-representative covariate were used as z-cov, meaning that DisMod estimates a value that gets added to the standard deviation of data points to reflect that these were not estimated according to our reference case definition/study method.

## References

- 1 Arnett FC, Edworthy SM, Bloch DA, *et al.* The American Rheumatism Association 1987 revised criteria for the classification of rheumatoid arthritis. *Arthritis Rheum* 1988; **31**: 315–24.
- 2 Kellgren JH. Diagnostic criteria for population studies. *Bull Rheum Dis* 1962; **13**: 291–2.
- 3 Bennett GA, Cobb S, Jacox R, Jessar RA, Ropes MW. Proposed diagnostic criteria for rheumatoid arthritis. *Bull Rheum Dis* 1956; **7**: 121–4.
- 4 Vonkeman HE, van de Laar MAFJ. The new European League Against Rheumatism/American College of Rheumatology diagnostic criteria for rheumatoid arthritis: how are they performing? *Curr Opin Rheumatol* 2013; **25**: 354–9.

# Osteoarthritis

## Flowchart

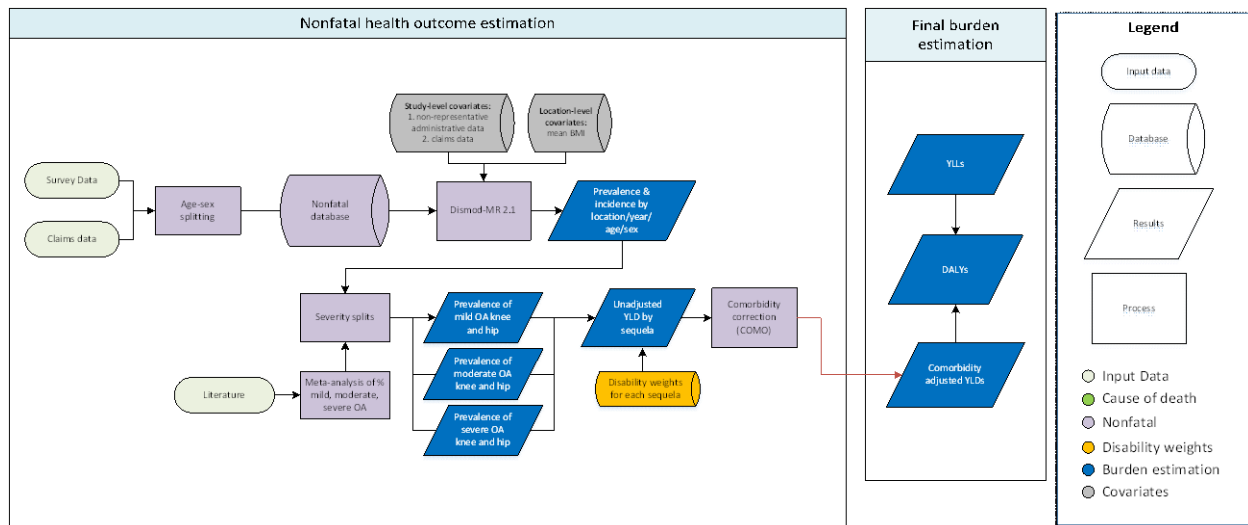

## Case definition

The osteoarthritis (OA) reference case definition is symptomatic osteoarthritis of the hip or knee radiologically confirmed as Kellgren-Lawrence grade 2-4. Grade 2 symptomatic requires one defined osteophyte in hip or knee and pain for at least one month out of the last 12. Grade 3-4 symptomatic requires osteophytes and joint space narrowing in hip or knee with deformity also present for grade 4, and pain for at least one month out of the last 12 months.

OA is the most common form of arthritis, involving inflammation and breakdown of joints. For the purposes of OA estimates for this GBD study, only hip and knee sites were reviewed. The hip and knee are the common sites of OA in the larger joints and are considered to produce the greatest disability. Failure of these joints can lead to need for joint replacement surgery, if available, and thus contributes to a significant proportion of the high direct health care costs attributable to arthritis. OA of the spine is also common; however, it was considered that any symptoms and disability related to the cervical and/or lumbar spine would be captured in the estimates of low back pain and neck pain. Hand OA involving the fingers and thumbs is another common site for OA, but as it often overlaps with knee OA and could also be captured in the "Other Musculoskeletal disorders" category, it was not considered as a separate entity in these GBD OA estimates.

ICD-10 codes for OA of the hip and knee are M16 and M17, respectively. The ICD-9 code for OA is 715, without specific codes for hip and knee sites.

## Input data

### *Model inputs*

A systematic review of the prevalence, incidence and mortality of OA was performed for the years 1980 to 2009 on MEDLINE, EMBASE, CINAHL, CAB Abstracts, WHO Library (WHOLIS) and OpenSIGLE for GBD2010. For prevalence and incidence, the following search terms were used: (osteoarth\* OR gonarthr\*) AND (prevalen\* OR inciden\* OR cross-sectional OR cross sectional OR epidemiol\* OR survey OR population-based OR population based OR population study OR population sample OR cohort OR follow-up OR follow up OR longitudinal OR regist\*) AND (list of names of all GBD countries). For mortality, the following search terms were used: (osteoarth\* OR gonarthr\*) AND (Mortality OR death OR standardised mortality ratio OR standardized mortality ratio OR case fatality OR cross-sectional OR cross sectional OR epidemiol\* OR survey OR population-based OR population based OR population study OR population sample OR cohort OR follow-up OR follow up OR longitudinal OR regist\*) AND (list of names of all GBD countries).

Exclusion criteria were:

54. Sub-populations clearly not representative of the national population
55. Not a population-based study
56. Low sample size (less than 150)
57. Review rather than original studies

The most recent PubMed search was conducted in GBD 2013 using the above search terms. Opportunistically, we added scientific literatures and population surveys encountered during data review for GBD 2015 and GBD 2016. The table below shows the number of literature studies included in GBD 2016, as well as the number of countries or subnational units and GBD world regions represented.

|                        | Prevalence |         | Incidence |         | Mortality risk | Severity |
|------------------------|------------|---------|-----------|---------|----------------|----------|
|                        | OA hip     | OA knee | OA hip    | OA knee |                |          |
| Studies                | 56         | 82      | 5         | 14      | 3              | 4        |
| Countries/subnationals | 90         | 100     | 5         | 14      | 2              | 3        |
| GBD world regions      | 9          | 10      | 2         | 3       | 2              | 3        |

In addition, data from US claims data for 2000, 2010, and 2012 by US state were included. We decided not to use hospital inpatient data as we considered it would not be representative of true prevalence, and that variation between countries in the proportion of true prevalent cases captured in hospital inpatient data system would likely vary more than can be captured by a single crosswalk in DisMod-MR 2.1.

### *Severity splits*

The basis of the GBD disability weight survey assessments are lay descriptions of sequelae highlighting major functional consequences and symptoms. The lay descriptions and disability weights for OA severity levels are shown below.

| Severity level | Lay description | DW (95% CI) |
|----------------|-----------------|-------------|
|----------------|-----------------|-------------|

|          |                                                                                                                                                                                             |                     |
|----------|---------------------------------------------------------------------------------------------------------------------------------------------------------------------------------------------|---------------------|
| Mild     | This person has pain in the leg, which causes some difficulty running, walking long distances, and getting up and down.                                                                     | 0.023 (0.013–0.037) |
| Moderate | This person has moderate pain in the leg, which makes the person limp, and causes some difficulty walking, standing, lifting and carrying heavy things, getting up and down, and sleeping.  | 0.079 (0.054–0.110) |
| Severe   | This person has severe pain in the leg, which makes the person limp and causes a lot of difficulty walking, standing, lifting and carrying heavy things, getting up and down, and sleeping. | 0.165 (0.112–0.232) |

To determine the proportion of people with OA within each of the severity levels, four studies from three regions provided information on the severity of OA. Severity was classified based on the Western Ontario and McMaster Universities Arthritis Index (WOMAC) with scores 0-5 taken as mild, 6-13 as moderate, and 14 and higher as severe. Estimates were pooled across studies using a random effects meta-analysis model. The pooled percentages were mild 47.0% (42.2–51.9), moderate 35.9% (31.3–40.7), and severe 17.1% (12.9–21.6) pooled between patient and physician ratings in a study from Bangladesh which we apply to low- and middle-income countries. The pooled proportions from three high-income countries were mild 74.3% (64.8–82.7), moderate 24.3% (16.4–33.1), and severe 1.1% (0.6–1.7). After streaming out 1,000 draws assuming a binomial distribution, percentages were scaled to sum to 1 at each draw.

## Modelling strategy

Prior settings in the DisMod model included setting remission to 0, and it was assumed that there was no incidence or prevalence of OA before the age of 30 years. We assumed in the final model that excess mortality is zero. While there are some data on excess mortality risk, the values of hazard ratios or standardised mortality ratios are close to one, with some studies reporting mean estimates less than one.

We used study covariates for studies that reported on X-rays only, self-reported OA with pain, reporting a physician diagnosis of OA, and OA with symptoms but no X-ray diagnosis. For each of these covariates we estimated the crosswalk prior to DisMod comparing like geographies which had data according to the reference case definition and the alternative. In DisMod we set bounds with an upper and lower limit. We added covariates for each of three years of claims data in the USA. Betas and exponentiated values (which can be interpreted as an odds ratio) for these covariates are shown in the table below:

| Study covariate                                  | Parameter  | OA hip |                    | OA knee |                    |
|--------------------------------------------------|------------|--------|--------------------|---------|--------------------|
|                                                  |            | beta   | Exponentiated beta | beta    | Exponentiated beta |
| Self-reported OA with pain                       | Prevalence | 1.25   | 3.48 (3.03 – 3.96) | 0.37    | 1.45 (1.14 – 1.69) |
| Reported physician diagnosis OA                  | Prevalence | 0.97   | 2.64 (2.45 – 2.72) | 0.092   | 1.10 (0.85 – 1.30) |
| Radiography only                                 | Prevalence | 0.95   | 2.59 (2.33 – 2.71) | 0.12    | 1.13 (0.88 – 1.32) |
| OA with symptoms but no radiography confirmation | Prevalence | 1.18   | 3.26 (3.01 – 3.77) | 0.68    | 1.97 (1.44 – 2.42) |
| Claims data - 2000                               | Prevalence | -0.53  | 0.59 (0.58 – 0.60) | -1.39   | 0.40 (0.19 – 0.29) |
| Claims data - 2010                               | Prevalence |        | not significant    | -0.91   | 0.40 (0.29 – 0.47) |



|                                 |            |      |                    |       |                    |
|---------------------------------|------------|------|--------------------|-------|--------------------|
| Claims data - 2012              | Prevalence |      | not significant    | -0.84 | 0.43 (0.32 – 0.51) |
| Reported physician diagnosis OA | Incidence  | 0.91 | 2.49 (2.24 – 2.71) | 0.64  | 1.89 (0.89 – 2.69) |
| Radiography only                | Incidence  | 0.91 | 2.47 (2.24 – 2.71) | 0.77  | 2.17 (1.33 – 2.69) |

We added mean body mass index (BMI) and the summary exposure variable (SEV) scalar for OA (ie, a composite measure of the exposure to risks in GBD that affect OA: BMI) as country-level covariates of prevalence measure, and the SEV-OA as a country-level covariate of incidence measure. The coefficient for BMI in OA hip model was 0.029 (exponentiated 1.03; 1.01–1.05) meaning that for every unit increase in mean BMI in the population OA prevalence increases by 3%.

# Low back pain (LBP)

## Flowchart

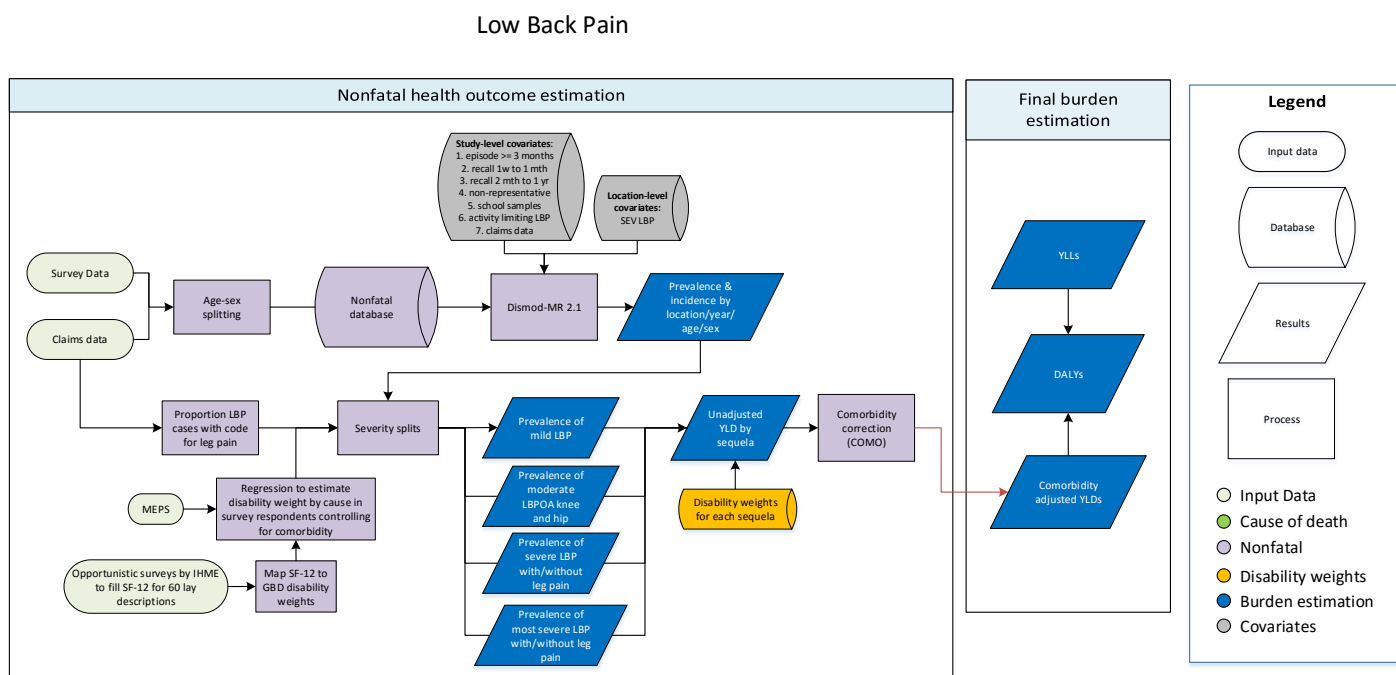

## Case definition

Low back pain (LBP) is defined as low back pain (with or without pain referred into one or both lower limbs) that lasts for at least one day. The “low back” is defined as the area on the posterior aspect of the body from the lower margin of the twelfth ribs to the lower gluteal folds.

ICD-10 codes for LBP are M54.3, M54.4 and M54.5. The ICD-9 code is 724.

## Input data

### Model inputs

Ovid Medline, EMBase, and CINAHL electronic databases were searched for GBD2010. There were no age, sex, or language restrictions. The terms “back pain,” “lumbar pain,” “back ache,” “backache,” and “lumbago” were used individually and combined with each of the following: “prevalence,” “incidence,” “cross-sectional,” and “epidemiology.” The search was updated for GBD 2015 in PUBMED through to August 2015.

Exclusion criteria were:

58. Sub-populations clearly not representative of the national population

- 59. Not a population-based study
- 60. Low sample size (less than 150)
- 61. Review rather than original studies

Additional information was derived from unit record data of surveys in the GHDx, GBD’s repository of population health data including the World Health surveys and national health surveys. The table below shows the number of studies and surveys included in GBD 2016, as well as the number of countries or subnational units and GBD world regions represented.

|                        | Prevalence | Incidence | Remission |
|------------------------|------------|-----------|-----------|
| Studies/surveys        | 253        | 4         | 4         |
| Countries/subnationals | 172        | 3         | 2         |
| GBD world regions      | 20         | 1         | 1         |

In addition, data from US claims data for 2000 and 2010 by US state were included.

*Severity splits*

The basis of the GBD disability weight survey assessments are lay descriptions of sequelae highlighting major functional consequences and symptoms. The lay descriptions and disability weights for LBP severity levels are shown below.

| Severity level                              | Lay description                                                                                                                                                                                          | DW (95% CI)         |
|---------------------------------------------|----------------------------------------------------------------------------------------------------------------------------------------------------------------------------------------------------------|---------------------|
| Low back pain, mild                         | This person has mild back pain, which causes some difficulty dressing, standing, and lifting things.                                                                                                     | 0.020 (0.011–0.035) |
| Low back pain, moderate                     | This person has moderate back pain, which causes difficulty dressing, sitting, standing, walking, and lifting things.                                                                                    | 0.054 (0.035–0.079) |
| Low back pain, severe without leg pain      | This person has severe back pain, which causes difficulty dressing, sitting, standing, walking, and lifting things. The person sleeps poorly and feels worried.                                          | 0.272 (0.182–0.373) |
| Low back pain, severe with leg pain         | This person has severe back and leg pain, which causes difficulty dressing, sitting, standing, walking, and lifting things. The person sleeps poorly and feels worried.                                  | 0.325 (0.219–0.446) |
| Low back pain, most severe without leg pain | This person has constant back pain, which causes difficulty dressing, sitting, standing, walking, and lifting things. The person sleeps poorly, is worried, and has lost some enjoyment in life.         | 0.372 (0.250–0.506) |
| Low back pain, most severe with leg pain    | This person has constant back and leg pain, which causes difficulty dressing, sitting, standing, walking, and lifting things. The person sleeps poorly, is worried, and has lost some enjoyment in life. | 0.384 (0.256–0.518) |

The severity distributions are derived from an analysis of the Medical Expenditure Panel Surveys (MEPS) in the US. MEPS is an overlapping continuous panel survey of the United States non-institutionalized population whose primary purpose is to collect information on the use and cost of health care. Panels are two years long and are conducted in five rounds, which are conducted every five to six months. A new panel begins annually, while the last panel is in its second year

([http://www.meps.ahrq.gov/survey\\_comp/hc\\_data\\_collection.jsp](http://www.meps.ahrq.gov/survey_comp/hc_data_collection.jsp)). Each panel typically contains about 30,000 to 35,000 individual respondents.

MEPS was initiated in 1996 but only began collecting health status data in the form of SF-12 responses in 2000. For GBD 2016 we used data from 2000–2014. Respondents self-administer the SF-12 twice per panel, at rounds 2 and 4, typically about a year apart. Only adults 18 years and older completed the SF-12. MEPS also usually collects information on diagnoses based on self-report of reasons for encounters with health services. In addition, diagnoses are derived through additional questions on “problems that bother you” or conditions that led to “disability days,” ie, days out of role due to illness. Professional coders translate the verbatim text into three digit ICD-9 codes. The main reason for LBP being measured in MEPS relates to health care contact. From MEPS, the severity distribution for LBP without leg pain and with leg pain were derived as shown in the below table.

| Severity level             | Distribution without leg pain | Distribution with leg pain |
|----------------------------|-------------------------------|----------------------------|
| Low back pain, mild        | 0.41 (0.31–0.53)              | 0.27 (0.19–0.37)           |
| Low back pain, moderate    | 0.35 (0.25–0.44)              | 0.36 (0.28–0.43)           |
| Low back pain, severe      | 0.10 (0.08–0.12)              | 0.14 (0.10–0.16)           |
| Low back pain, most severe | 0.14 (0.09–0.20)              | 0.23 (0.15–0.32)           |

We used US claims data (2012) to derive the proportion of cases with low back pain who report leg pain. The proportions were different by age group as shown in Figure 1. The proportion in each severity level in each age group is calculated by multiplying the proportion in the severity level and the proportion with or without leg pain.

**Figure 1: Proportion of LBP with leg pain**

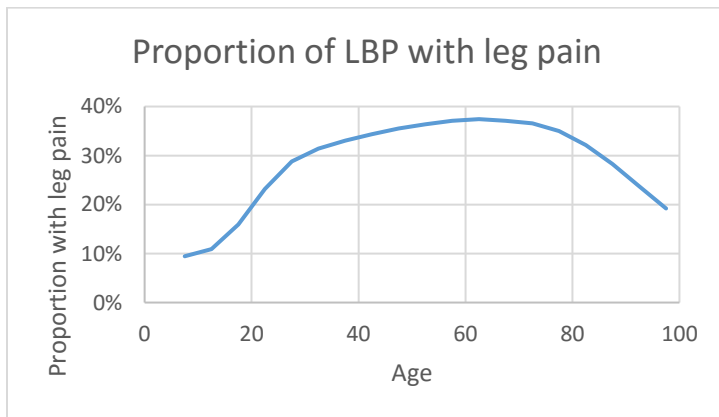

| Age (years) | Proportion with leg pain |
|-------------|--------------------------|
| 5–9         | 9.4 (9.1–9.8) %          |
| 10–14       | 10.9 (10.7–11.1) %       |
| 15–19       | 15.9 (15.8–16.1) %       |

|        |                    |
|--------|--------------------|
| 20–24  | 23.2 (23.0–23.4) % |
| 25–29  | 28.8 (28.6–28.9) % |
| 30–34  | 31.4 (31.3–31.6) % |
| 35–39  | 33.1 (32.9–33.2) % |
| 40–44  | 34.3 (34.2–34.4) % |
| 45–49  | 35.5 (35.4–35.6) % |
| 50–54  | 36.4 (36.3–36.5) % |
| 55–59  | 37.1 (37.0–37.2) % |
| 60–64  | 37.4 (37.3–37.5) % |
| 65–69  | 37.1 (36.9–37.3) % |
| 70–74  | 36.5 (36.4–36.7) % |
| 75–79  | 35.0 (34.8–35.2) % |
| 80–84  | 32.1 (31.9–32.4) % |
| 85–89  | 28.3 (28.0–28.5) % |
| 90–94  | 23.7 (23.2–24.2) % |
| 95–100 | 19.2 (18.2–20.2) % |

## Modelling Strategy

Prior settings in the DisMod model included setting excess mortality to 0, and it was assumed that there was no incidence or prevalence of low back pain before the age of 5 years.

We used study covariates for studies that reported a too broad anatomical region, episode duration of greater than three months, recall periods of one week to one month, recall periods between two months and one year, activity-limiting LBP, and studies conducted among schoolchildren or otherwise non-representative samples as studies covering regional rather than (sub)-nationally representative populations. The mean and standard error for the coefficient of the covariate of studies among schoolchildren population were calculated and used for a constraint in DisMod. The other covariates have their coefficients constraint by reasonable ranges in the direction whether they increased or decreased the estimates. We added covariates for each of three years of claims data in the USA. Betas and exponentiated values (which can be interpreted as an odds ratio) for these two covariates are shown in the table below:

| Study covariate                              | Parameter  | beta    | Exponentiated beta <sup>1</sup> |
|----------------------------------------------|------------|---------|---------------------------------|
| Anatomical region too broad                  | Prevalence | 0.00049 | 1.00 (1.00 – 1.00)              |
| episode duration >= 3 months                 | Prevalence | -0.58   | 0.56 (0.53 – 0.59)              |
| recall periods of 1 week to 1 month          | Prevalence | 0.67    | 1.96 (1.90 – 2.02)              |
| recall periods between 2 months and one year | Prevalence | 0.67    | 1.95 (1.89 – 2.01)              |
| Not representative                           | Prevalence | 0.17    | 1.19 (1.14 – 1.25)              |
| studies among school children                | Prevalence | 1.00    | 2.72 (2.72 – 2.72)              |
| Activity-limiting LBP                        | Prevalence | -0.82   | 0.44 (0.42 – 0.46)              |
| Claims data - 2000                           | Prevalence | -0.55   | 0.57 (0.56 – 0.59)              |

|                    |            |        |                    |
|--------------------|------------|--------|--------------------|
| Claims data - 2010 | Prevalence | -0.098 | 0.91 (0.89 – 0.92) |
|--------------------|------------|--------|--------------------|

<sup>1</sup> interpretation examples: in DisMod-MR 2.1 activity limiting LBP data points showed a systematic bias downward and were adjusted up by dividing by 0.72, while data points of recall greater than two months were adjusted downward dividing by 2.36.

We dropped the covariate for claims data 2012 as it had a non-significant coefficient close to zero. We included the SEV scalar for low back pain as a country covariate. This combines the exposure measures for risks estimated to impinge on LBP in GBD: occupational ergonomic exposure and increased BMI. We set bounds of 0.75 to 1.25 as the SEV is constructed in a way that if our risk estimates are accurate the value should be 1.

# Neck pain (NP)

## Flowchart

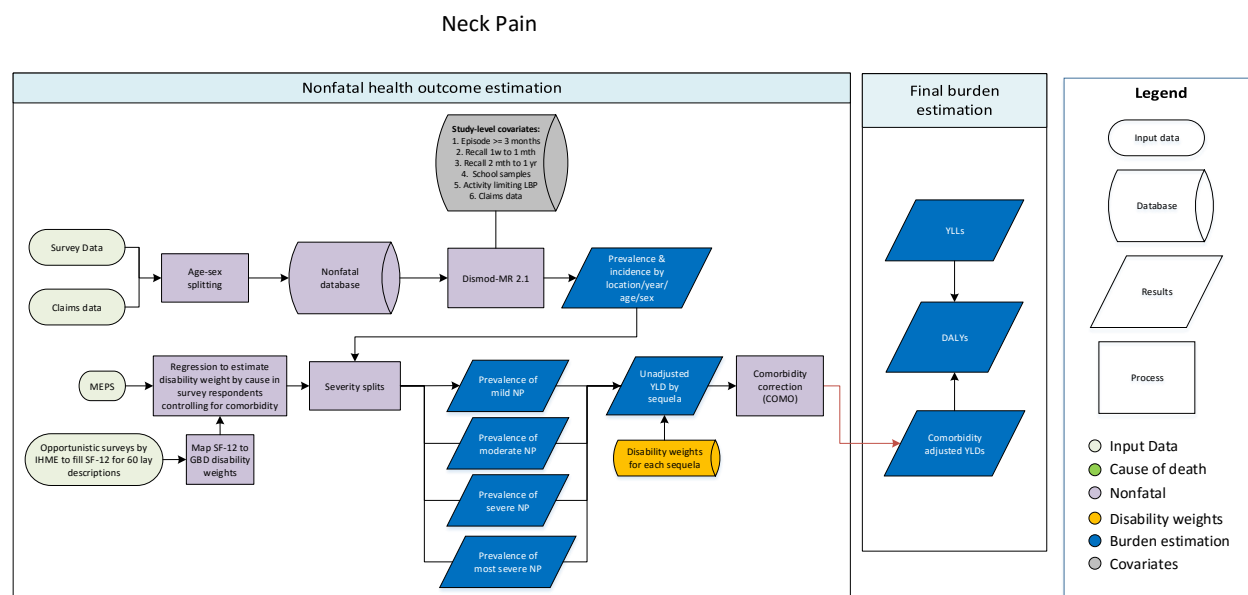

## Case definition

Neck pain (NP) was defined as: *neck pain (+/- pain referred into the upper limb(s)) that lasts for at least one day.*

ICD-10 code for neck pain is M54.2. The ICD-9 code is 723.1.

## Input data

### Model inputs

Ovid MEDLINE, EMBASE, CINAHL, CAB abstracts, WHOLIS, and SIGLE databases were searched for GBD 2010. There were no age, sex, or language restrictions. The terms *neck pain*, *neck ache*, *neckache*, and *cervical pain* individually and combined with each of the following terms: *prevalen\**, *inciden\**, *cross-sectional*, *cross sectional*, *epidemiol\**, *survey*, *population-based*, *population based*, *population study*, *population sample*. The search was updated for GBD 2013 and GBD 2015 in PUBMED through to August 2015.

Exclusion criteria were:

62. Sub-populations clearly not representative of the national population
63. Not a population-based study

- 64. Studies on a specific type of neck pain (eg, following neck fracture)
- 65. Low sample size (less than 150)
- 66. Review rather than original studies

Additional information was derived from unit record data of surveys in GHDx, GBD’s repository of population health data including NHANES and NHIS in the USA. The table below shows the number of studies and surveys included in GBD 2016, as well as the number of countries or subnational units and GBD world regions represented.

|                        | Prevalence | Incidence | Remission |
|------------------------|------------|-----------|-----------|
| Studies/surveys        | 81         | 2         | 1         |
| Countries/subnationals | 91         | 1         | 1         |
| GBD world regions      | 11         | 1         | 1         |

In addition, data from US claims data for 2000, 2010, and 2012 by US state were included.

#### *Severity splits*

The basis of the GBD disability weight survey assessments are lay descriptions of sequelae highlighting major functional consequences and symptoms. The lay descriptions and disability weights for neck pain severity levels are shown below.

| Severity level         | Lay description                                                                                                                                                                              | DW (95% CI)         | Proportions      |
|------------------------|----------------------------------------------------------------------------------------------------------------------------------------------------------------------------------------------|---------------------|------------------|
| Neck pain, mild        | This person has neck pain, and has difficulty turning the head and lifting things                                                                                                            | 0.052 (0.036–0.074) | 0.67 (0.57–0.75) |
| Neck pain, moderate    | This person has constant neck pain, and has difficulty turning the head, holding arms up, and lifting things                                                                                 | 0.112 (0.079–0.162) | 0.12 (0.08–0.19) |
| Neck pain, severe      | This person has severe neck pain, and difficulty turning the head and lifting things. The person gets headaches and arm pain, sleeps poorly, and feels tired and worried                     | 0.226 (0.147–0.323) | 0.06 (0.05–0.07) |
| Neck pain, most severe | This person has constant neck pain and arm pain, and difficulty turning the head, holding arms up, and lifting things. The person gets headaches, sleeps poorly, and feels tired and worried | 0.300 (0.199–0.434) | 0.15 (0.11–0.20) |

The severity distributions are derived from an analysis of the Medical Expenditure Panel Surveys (MEPS) in the US. MEPS is an overlapping continuous panel survey of the United States non-institutionalized population whose primary purpose is to collect information on the use and cost of health care. Panels are two years long and are conducted in five rounds, which are conducted every five to six months. A new panel begins annually, while the last panel is in its second year ([http://www.meps.ahrq.gov/survey\\_comp/hc\\_data\\_collection.jsp](http://www.meps.ahrq.gov/survey_comp/hc_data_collection.jsp)). Each panel typically contains about 30,000 to 35,000 individual respondents.

MEPS was initiated in 1996 but only began collecting health status data in the form of SF-12 responses in 2000. For GBD 2016 we used data from 2000–2014. Respondents self-administer the SF-12 twice per panel, at rounds two and four, typically about a year apart. Only adults 18 years and older completed the



SF-12. MEPS also usually collects information on diagnoses based on self-report of reasons for encounters with health services. In addition, diagnoses are derived through additional questions on “problems that bother you” or conditions that led to “disability days,” ie, days out of role due to illness. Professional coders translate the verbatim text into three-digit ICD-9 codes. The main reason for neck pain being measured in MEPS relates to health care contact.

In order to derive a crosswalk of SF-12 values into a scale comparable with that used by the GBD disability weights, small studies on convenience samples were conducted asking respondents to fill in SF-12 to reflect 62 lay descriptions of diverse severity that were used to derive the GBD disability weights. From these responses a relationship between SF-12 summary score and the GBD DWs was derived. With regression methods, average disability weights were calculated for each of 156 conditions for which there were corresponding diagnoses in MEPS, while controlling for any co-morbid other condition by adding dummy variables for each condition. As our case definition is for point prevalence of neck pain, we ignored the proportion of MEPS respondents with a neck pain diagnosis for whom in our regression we found no disability attributable to neck pain. For the remaining cases we binned the amount of DW attributed to neck pain across the four health states assuming thresholds at the midpoints between DW values.

### Modeling strategy

Prior settings in the DisMod model included setting excess mortality to 0, and it was assumed that there was no incidence or prevalence of neck pain before the age of 5 years.

We used study covariates for studies that reported a too broad anatomical region, episode duration of greater than three months, recall periods of one week to one month, recall periods between two months and one year, activity-limiting neck pain, and studies conducted among schoolchildren. We added covariates for each of three years of claims data in the USA.

With exceptions for broad anatomical region, studies among schoolchildren population and activity limiting neck pain whose coefficients were consistent with their reasonable ranges, the means and the upper and lower bounds for the covariates were calculated by crosswalking with NHANES data as a baseline. The table below shows the prior values for those covariates’ coefficients.

| Study covariate                              | Lower bound | Mean  | Upper bound |
|----------------------------------------------|-------------|-------|-------------|
| Anatomical region too broad                  | 0           |       | 2           |
| episode duration >= 3 months                 | -0.81       | -0.74 | -0.67       |
| recall periods of 1 week to 1 month          | 0.67        | 0.77  | 0.87        |
| recall periods between 2 months and one year | 0.77        | 0.87  | 0.97        |
| studies among school children                | 0           |       | 3           |
| Activity-limiting neck pain                  | -3          |       | 0           |
| Claims data - 2000                           | -2.20       | -2.08 | -1.96       |
| Claims data - 2010                           | -1.73       | -1.57 | -1.41       |
| Claims data - 2012                           | -1.65       | -1.50 | -1.35       |

Betas and exponentiated values (which can be interpreted as an odds ratio) for these two covariates are shown in the table below:

| Study covariate                              | Parameter  | beta  | Exponentiated beta <sup>1</sup> |
|----------------------------------------------|------------|-------|---------------------------------|
| Anatomical region too broad                  | Prevalence | 0.52  | 1.68 (1.53 – 1.84)              |
| episode duration >= 3 months                 | Prevalence | -0.68 | 0.51 (0.49 – 0.51)              |
| recall periods of 1 week to 1 month          | Prevalence | 0.86  | 2.37 (2.32 – 2.39)              |
| recall periods between 2 months and one year | Prevalence | 0.79  | 2.21 (2.16 – 2.29)              |
| studies among school children                | Prevalence | 2.53  | 12.54 (10.64 – 14.94)           |
| Activity-limiting neck pain                  | Prevalence | -1.42 | 0.24 (0.19 – 0.31)              |
| Claims data - 2000                           | Prevalence | -2.19 | 0.11 (0.11 – 0.11)              |
| Claims data - 2010                           | Prevalence | -1.60 | 0.20 (0.20 – 0.21)              |
| Claims data - 2012                           | Prevalence | -1.51 | 0.22 (0.22 – 0.23)              |

<sup>1</sup> interpretation examples: in DisMod-MR 2.1 activity-limiting NP data points showed a systematic bias downward and were adjusted up by dividing by 0.34 while data points of recall greater than 2 months were adjusted downward dividing by 4.63.

# Gout

## Flowchart

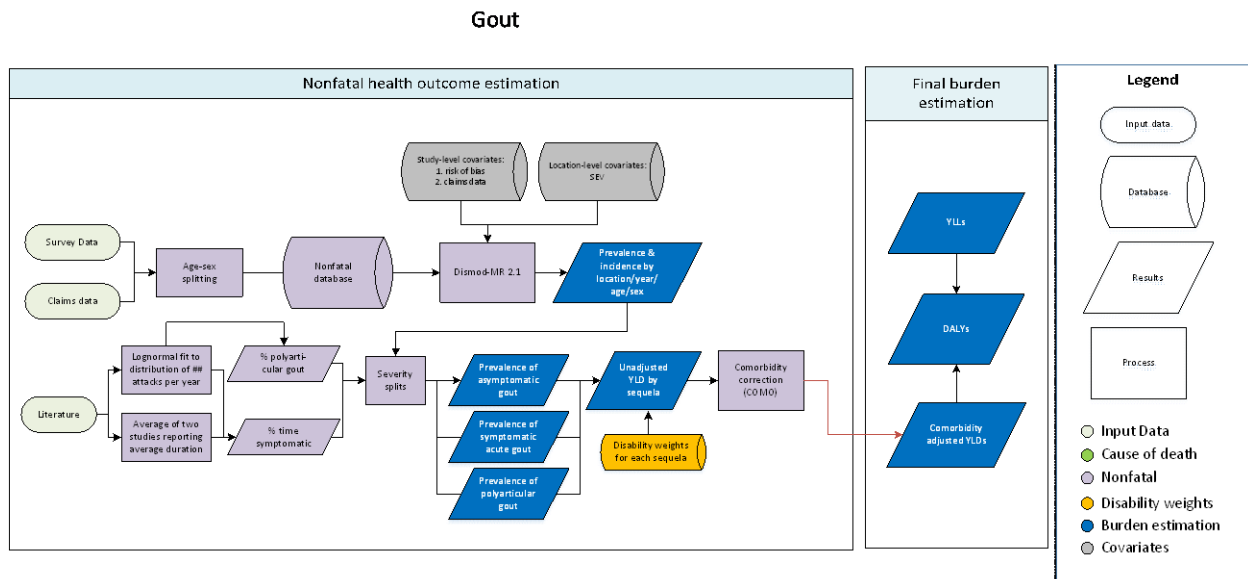

## Case definition

Gout is a rheumatic disease that is characterized by formation of monosodium urate (MSU) crystals in the synovial fluid of joints and in other tissues causing inflammation. The crystal formation is caused by elevated urate levels in extracellular fluids. It is more common in men. GBD uses the case definition of primary gout given by the American College of Rheumatology, generally referred to as ARA 1977 survey criteria requiring the presence of MSU crystals in joint fluid or the presence of a tophus proven to contain MSU crystals and at least six of 12 gout symptoms or findings (>1 attack of acute arthritis, development of maximal inflammation within a day, attack of monarticular arthritis, observation of joint erythema, pain or swelling in the first MTP joint, unilaterally attack involving the first MTP joint, unilateral attack involving tarsal joint, suspected tophus, hyperuricemia, asymmetrical swelling within a joint on X-ray and negative culture of joint fluid for microorganisms during attack of joint inflammation) to make a diagnosis. The ICD-10 code for gout is M10 and the ICD9 code is 274.

## Input data

### *Model Inputs*

For GBD 2010 literature searches were performed for years 1980 to 2009 on MEDLINE, EMBASE, CINAHL, CAB Abstracts, WHO Library (WHOLIS), and OpenSIGLE. For prevalence and incidence, the following search terms were used: (gout\* OR hyperuricemia) AND (prevalen\* OR inciden\* OR cross-sectional OR cross sectional OR epidemiol\* OR survey OR population-based OR population based OR population study OR population sample OR cohort OR follow-up OR follow up OR longitudinal OR regist\*) AND (list of names of all GBD countries). For mortality, the following search terms were used: (gout\* OR

hyperuricemia) AND (Mortality OR death OR standardised mortality ratio OR standardized mortality ratio OR case fatality OR cross-sectional OR cross sectional OR epidemiol\* OR survey OR population-based OR population based OR population study OR population sample OR cohort OR follow-up OR follow up OR longitudinal OR regist\*) AND (list of names of all GBD countries).

Exclusion criteria were:

- Sub-populations clearly not representative of the national population
- Not a population-based study
- Low sample size (less than 150)
- Review

The most recent PubMed search was conducted in GBD 2013 using the above search terms. Opportunistically, additional studies encountered during data review were added for GBD 2015. Since we did not add new literature in GBD 2016, the most recent literature source dates from 2014. The table below shows the number of literature studies included in GBD 2016, as well as the number of countries or subnational units and GBD world regions represented.

|                        | Prevalence | Incidence | Mortality risk |
|------------------------|------------|-----------|----------------|
| Studies                | 73         | 11        | 3              |
| Countries/subnationals | 90         | 7         | 2              |
| GBD world regions      | 12         | 4         | 1              |

In addition, data from US claims data for 2000, 2010, and 2012 by state were included.

#### *Severity splits*

The basis of the GBD disability weight survey assessments are lay descriptions of sequelae highlighting major functional consequences and symptoms. The lay descriptions and disability weights for gout severity levels are shown below.

| Severity level                             | Lay description                                                                                                                                                                                                                                    | DW (95% CI)         |
|--------------------------------------------|----------------------------------------------------------------------------------------------------------------------------------------------------------------------------------------------------------------------------------------------------|---------------------|
| Gout, acute                                | This person has severe pain and swelling in the leg, making it very difficult to get up and down, stand, walk, lift, and carry heavy things. The person has trouble sleeping because of the pain.                                                  | 0.295 (0.196–0.409) |
| Polyarticular gout (same as for severe RA) | This person has severe, constant pain and deformity in most joints, causing difficulty moving around, getting up and down, eating, dressing, lifting, carrying, and using the hands. The person often feels sadness, anxiety, and extreme fatigue. | 0.581 (0.403–0.739) |

We used three studies on the distribution of the number of gout attacks per year and fitted a lognormal curve using a least squared differences method. In the absence of data on the proportion of gout cases who have chronic polyarticular gout, we assumed the proportion is equal to those who would have 52 attacks a year (ie, weekly) or more as implied by the lognormal curve.

The average number of attacks was estimated from the lognormal fit: 5.66 (5.14–6.18). From two studies we derived an average duration of attacks of 6.1 (5.4–6.8) days by simple averaging. The resulting proportion of time symptomatic for acute gout was taken as the multiplication of these two estimates divided by the number of days in a year: 9.4% (8.0–10.9%).

Figure 1: Distribution of cases by frequency

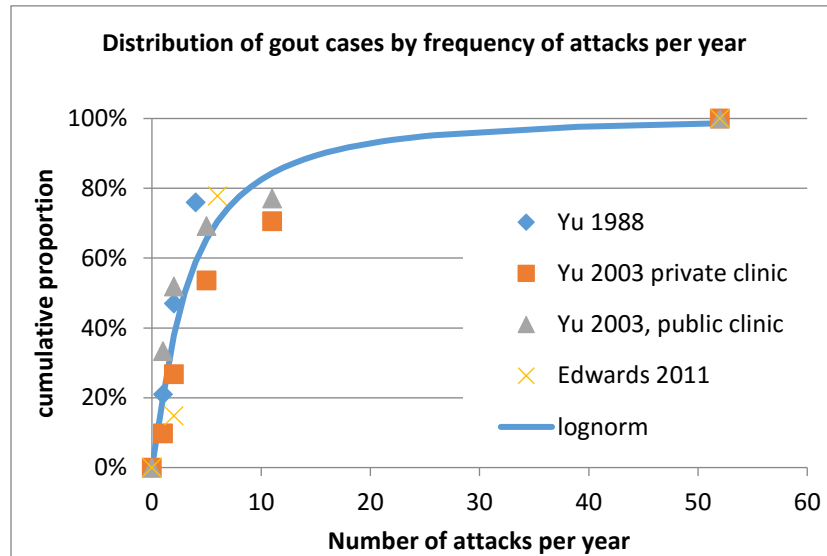

### Modelling strategy

Initially we set remission to zero but found this made incidence and prevalence inconsistent. As the ratio of prevalence and incidence in similar locations was in the order of 10:1 we decided to allow remission to range between 0 and 0.2 and that made incidence and prevalence more consistent. We assumed that there was no incidence or prevalence of gout before the age of 15 years.

We used a covariate for the 2000 US claims data but assumed the latter two years reflect the reference case definition. For studies relying on self-reported diagnoses or not stating diagnostic criteria were flagged with a covariate for a risk of bias. However, the risk of bias covariate was found to be insignificant; thus, it was used as a covariate that affects only uncertainty but not mean estimates.

Betas and exponentiated values (which can be interpreted as an odds ratio) for the claims covariate are shown in the table below:

| Study covariate    | Parameter  | beta  | Exponentiated beta |
|--------------------|------------|-------|--------------------|
| Claims data – 2000 | Prevalence | -0.66 | 0.52 (0.50–0.53)   |

We added the Summary Exposure Variable (SEV) scalar for gout which summarizes exposure to risks estimated in GBD to impinge on gout, ie, low glomerular filtration rate as a country covariate. We set bounds of 0.75 to 1.25 as the SEV is constructed in a way that if our risk estimates are accurate the value should be 1.

# Other musculoskeletal disorders (MSK)

## Flowchart

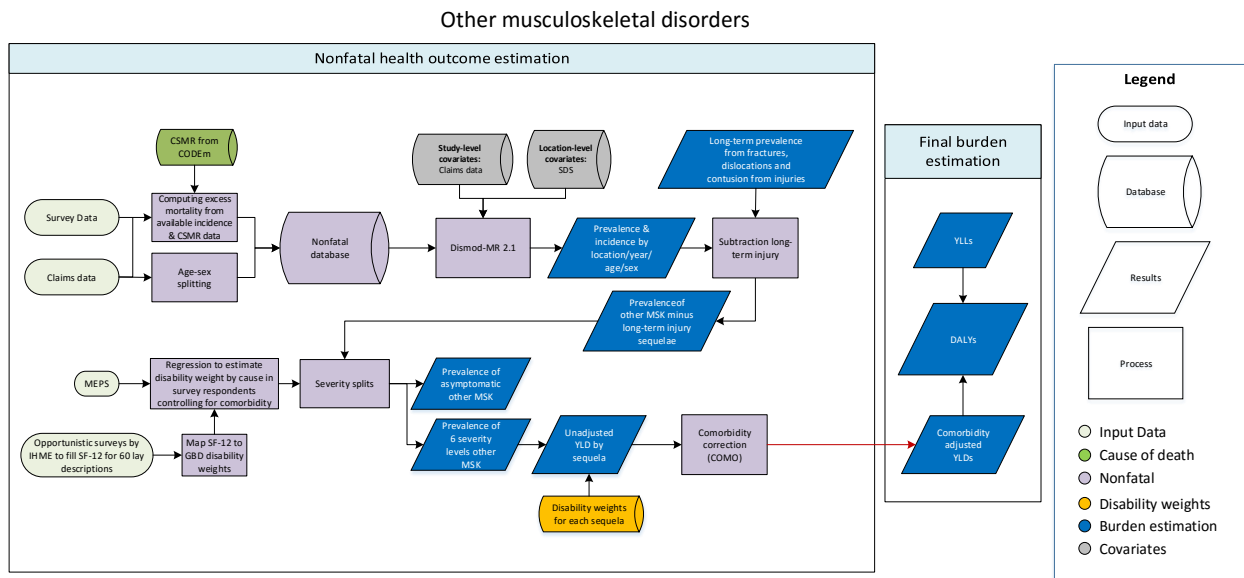

## Case definition

Other musculoskeletal (MSK) disorders is a heterogeneous rest category comprising a wide range of disorders of muscles, bones, and ligaments that are not included in the five GBD defined musculoskeletal diseases rheumatoid arthritis, osteoarthritis, low back and neck pain, and gout, and are not captured as long-term sequelae of injuries.

The table below provides detail of the ICD-10 and ICD-9 codes included in this category.

| ICD-10 codes                                    | ICD-9 codes          |
|-------------------------------------------------|----------------------|
| L93—Lupus erythematosus                         | 710.0                |
| M00-M02—Infectious arthropathies                | 711                  |
| M08, M11-M13—Inflammatory polyarthropathies     | 712–713              |
| M20-M25—Other joint disorders                   | 716–719              |
| M30-M35—Systemic connective tissue disorders    | 710.1-710.9          |
| M40-M43—Deforming dorsopathies                  | 737                  |
| M45-M46—Spondylopathies                         | 720–721              |
| M60 -M63—Disorders of muscles                   | 725                  |
| M65-M68—Disorders of synovium and tendon        | 726–728              |
| M70- M73, M75-M79—Other soft tissue disorders   | 729                  |
| M80-M85—Disorders of bone density and structure | 733.0-2              |
| M86—Osteomyelitis                               | 730.1-730.3, 730.7-9 |
| M87-M90—Other osteopathies                      | 731, 733.3-9         |

|                                                                                           |                         |
|-------------------------------------------------------------------------------------------|-------------------------|
| M91-M94—Chondropathies<br>M95-M99—Other disorders of the MSK system and connective tissue | 732<br>734–736, 738–739 |
|-------------------------------------------------------------------------------------------|-------------------------|

## Input data

### *Model Inputs*

The above ICD codes were used to extract other MSK prevalence from US claims data for 2000, 2010, and 2012 by US state. The systematic review concentrated on finding health surveys that measured an overall amount of musculoskeletal disorders and complaints and reported information to distinguish a rest category that was not OA, RA, gout, or low back or neck pain. These data sources are based on self-reported musculoskeletal conditions or symptoms and not on the listed ICD codes.

The table below shows the number of studies and surveys included in GBD 2016, as well as the number of countries or subnational units and GBD world regions represented.

|                        | Prevalence | Incidence | Remission |
|------------------------|------------|-----------|-----------|
| Studies/surveys        | 45         | 2         | 1         |
| Countries/subnationals | 70         | 1         | 1         |
| GBD world regions      | 11         | 1         | 1         |

### *Severity splits*

The basis of the GBD disability weight survey assessments are lay descriptions of sequelae highlighting major functional consequences and symptoms. The lay descriptions and disability weights for other MSK severity levels are shown below. They include the three levels of health states that are used for osteoarthritis and rheumatoid arthritis, each.

| Severity level                                  | Lay description                                                                                                                                                             | DW (95% CI)         | Proportions      |
|-------------------------------------------------|-----------------------------------------------------------------------------------------------------------------------------------------------------------------------------|---------------------|------------------|
| Asymptomatic                                    |                                                                                                                                                                             |                     | 0.28 (0.27–0.29) |
| Musculoskeletal problems, lower limbs, mild     | This person has pain in the leg, which causes some difficulty running, walking long distances, and getting up and down.                                                     | 0.023 (0.013–0.040) | 0.22 (0.15–0.30) |
| Musculoskeletal problems, upper limbs, mild     | This person has mild pain and stiffness in the arms and hands. The person has some difficulty lifting, carrying, and holding things.                                        | 0.028 (0.017–0.046) | 0.20 (0.15–0.29) |
| Musculoskeletal problems, upper limbs, moderate | This person has moderate pain and stiffness in the arms and hands, which causes difficulty lifting, carrying, and holding things, and trouble sleeping because of the pain. | 0.115 (0.079–0.163) | 0.10 (0.06–0.15) |

|                                                 |                                                                                                                                                                                                                                                    |                     |                  |
|-------------------------------------------------|----------------------------------------------------------------------------------------------------------------------------------------------------------------------------------------------------------------------------------------------------|---------------------|------------------|
| Musculoskeletal problems, lower limbs, severe   | This person has severe pain in the leg, which makes the person limp and causes a lot of difficulty walking, standing, lifting and carrying heavy things, getting up and down, and sleeping.                                                        | 0.163 0.109–0.224   | 0.06 (0.04–0.07) |
| Musculoskeletal problems, generalized, moderate | This person has pain and deformity in most joints, causing difficulty moving around, getting up and down, and using the hands for lifting and carrying. The person often feels fatigue.                                                            | 0.312 (0.201–0.438) | 0.07 (0.06–0.08) |
| Musculoskeletal problems, generalized, severe   | This person has severe, constant pain and deformity in most joints, causing difficulty moving around, getting up and down, eating, dressing, lifting, carrying, and using the hands. The person often feels sadness, anxiety, and extreme fatigue. | 0.572 (0.370–0.758) | 0.07 (0.07–0.08) |

The severity distributions are derived from an analysis of the Medical Expenditure Panel Surveys (MEPS) in the US. MEPS is an overlapping continuous panel survey of the United States non-institutionalized population whose primary purpose is to collect information on the use and cost of health care. Panels are two years long and are conducted in five rounds, which are conducted every five to six months. A new panel begins annually, while the last panel is in its second year ([http://www.meps.ahrq.gov/survey\\_comp/hc\\_data\\_collection.jsp](http://www.meps.ahrq.gov/survey_comp/hc_data_collection.jsp)). Each panel typically contains about 30,000 to 35,000 individual respondents.

MEPS was initiated in 1996, but only began collecting health status data in the form of 12-Item Short Form Survey (SF-12) responses in 2000. For GBD 2016 we used data from 2000–2014. Respondents self-administer the SF-12 twice per panel, at rounds two and four, typically about a year apart. Only adults 18 years and older completed the SF-12. MEPS also usually collects information on diagnoses based on self-report of reasons for encounters with health services. In addition, diagnoses are derived through additional questions on “problems that bother you” or conditions that led to “disability days,” ie, days out of role due to illness. Professional coders translate the verbatim text into three-digit ICD-9 codes. The main reason for other MSK being measured in MEPS relates to health care contact.

In order to derive a crosswalk of SF-12 values into a scale comparable with that used by the GBD disability weights, small studies on convenience samples were conducted asking respondents to fill in SF-12 to reflect 62 lay descriptions of diverse severity that were used to derive the GBD disability weights. From these responses a relationship between SF-12 summary score and the GBD DWs was derived. With regression methods, average disability weights were calculated for each of 156 conditions for which there were corresponding diagnoses in MEPS, while controlling for any comorbid other condition by adding dummy variables for each condition. We binned the amount of DW attributed to neck pain across the seven health states assuming thresholds at the midpoints between DW values.



## Modeling Strategy

Prior settings in the DisMod model included setting excess mortality to 0, and it was assumed that there was no incidence or prevalence of other MSK before the age of 10 years. In the absence of any meaningful data on incidence and remission for such a heterogeneous category of disorders, we made a rather arbitrary decision of remission 0.5–1, ie, an average duration of 1-2 years. We included cause-specific mortality rate (CSMR) data for other MSK and estimated priors on excess mortality rate by dividing all prevalence data points by the corresponding CSMR. In GBD 2016, new CSMR data include older age group, ie, 80-85, 85-90, 90-95, and 95+ years, in addition to 80+ years in GBD 2015.

We used study covariates for each of the three years of claims data in the USA. Betas and exponentiated values (which can be interpreted as an odds ratio) for these two covariates are shown in the table below:

| Study covariate    | Parameter  | beta | Exponentiated beta <sup>1</sup> |
|--------------------|------------|------|---------------------------------|
| Claims data - 2000 | Prevalence | 0.54 | 1.72 (1.66 — 1.81)              |
| Claims data - 2010 | Prevalence | 0.87 | 2.40 (2.31 — 2.53)              |
| Claims data - 2012 | Prevalence | 0.91 | 2.49 (2.40 — 2.62)              |

<sup>1</sup> interpretation examples: in DisMod-MR 2.1 2012 claims data are reduced by a factor 2.71.

We allow positive coefficients on claims data as all our other data sources are based on other MSK disorders in the absence of low back pain, neck pain, OA, RA, and gout, while claims data reflect the one-year prevalence of having an ICD-coded other MSK condition mentioned. As there are multiple other MSK conditions that last less than a year, it is not surprising to find higher one-year prevalence in claims data than the point prevalence estimates derived from surveys.

We use the GBD sociodemographic scalar variable as a covariate with a small coefficient of 0.17 estimated by DisMod-MR 2.1.

In order to avoid double counting, we subtract the long-term sequelae of fractures, dislocations, and contusions due to injuries from other MSK, as the surveys from which we derive prevalence estimates make no distinction between cases with other MSK problems that are or are not due to injuries.

## Congenital Anomalies Appendix

This write-up covers the following causes: congenital heart defects, neural tube defects, cleft lip and cleft palate, congenital anomalies of the urogenital system, congenital anomalies of the gastrointestinal tract, musculoskeletal congenital anomalies, Down Syndrome, Turner Syndrome, Klinefelter Syndrome, and other chromosomal abnormalities, genetic syndromes and micro-deletions

## Flowchart

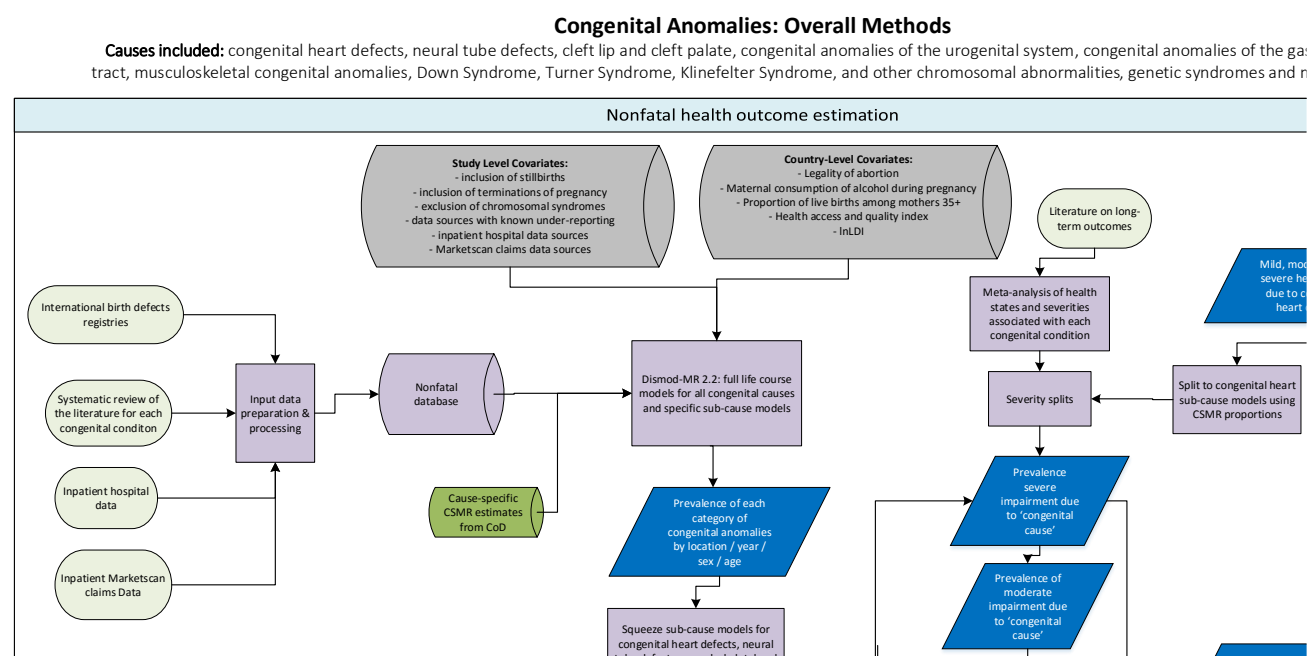

## Case Definitions

### Summary

The GBD case definition of congenital anomalies includes any condition present at birth that is a result of abnormalities of embryonic development, excluding those that are directly the result of infections or substance abuse (e.g. fetal alcohol syndrome, congenital syphilis) and excludes minor anomalies as they are defined by EUROCAT. Further, our GBD case definition includes only live births and excludes all terminations of pregnancy following prenatal diagnosis and stillbirths.

We have estimated the prevalence and associated disability of the following categories of congenital birth defects

1. **Neural tube defects**
  - a. Anencephaly
  - b. Encephalocele
  - c. Spina bifida
2. **Congenital heart defects**
  - a. Single ventricle and single ventricle pathway defects

- b. Severe congenital heart defects excluding single ventricle and single ventricle pathway defects
  - c. Critical malformations of great vessels, congenital valvular heart disease and patent ductus arteriosus
  - d. Ventricular septal defect and atrial septal defect
  - e. Other congenital cardiovascular anomalies
3. **Orofacial clefts: Cleft lip and cleft palate**
  4. **Down Syndrome**
  5. **Turner Syndrome**
  6. **Klinefelter Syndrome**
  7. **Other chromosomal abnormalities, genetic syndromes, and micro-deletions**
    - a. Edwards Syndrome and Patau Syndrome
  8. **Congenital anomalies of the urogenital system**
    - a. Congenital urinary anomalies
    - b. Congenital genital anomalies
  9. **Congenital anomalies of the digestive system**
    - a. Congenital diaphragmatic hernia
    - b. Congenital malformations of the abdominal wall
    - c. Congenital atresia and/or stenosis of the gastrointestinal tract
    - d. Other congenital malformations of the gastrointestinal tract
  10. **Musculoskeletal congenital anomalies**
    - a. Polydactyly and syndactyly
    - b. Limb reduction defects
    - c. Other musculoskeletal congenital anomalies
  11. **Other congenital anomalies: all birth defects (excluding minor anomalies) not contained in the other categories.**

Urogenital, musculoskeletal, and gastrointestinal are all new causes estimated for the first time in GBD 2016. Previously all were included in the “other congenital anomalies” category.

This appendix will first describe the input data sources and aspects of the modeling strategy that are common to all sub-types of congenital anomalies. We will then provide a description of the case definitions, ICD-10 codes, and health states associated with each of the component congenital causes, as well as the specific modeling strategies employed in each congenital cause, including the model settings, study-level and country-level covariates, and other modeling decisions made.

## *Input Data Sources*

*Several types of data sources are used in the estimation of congenital anomalies: literature prevalence, with-condition mortality and excess mortality data, birth prevalence and neonatal with-condition mortality data from a number of international birth defects registries and surveillance systems, inpatient hospital and MarketScan claims data prepared internally by the GBD research team, and cause-specific mortality estimates produced by the GBD 2016 causes of death analysis.*

*We conducted a systematic review of the available literature for all types of congenital anomalies by constructing search strings designed to capture information on the prevalence, associated mortality and long-term health outcomes associated with each sub-category of congenital anomalies. All results were screened – first abstracts, then full-text screenings – to ensure the availability of required information and the representativeness of the reported population, and the exclusion of duplicate data also reported as part of the birth registry data inputs.*

*We extracted data from a number of international birth defects registries. The International Clearinghouse for Birth Defects Surveillance and Research (ICBDSR) reports birth prevalence from a number of international member registries. The World Atlas Report also published birth prevalence estimates from these international registries prior to the publication of ICBDSR reports. The European Surveillance of Congenital Anomalies (EUROCAT) reports the birth prevalence of anomalies as for a variety of locations in Western Europe as reported by participating member registries. China's Maternal and Child Health Surveillance survey (MCHS) reports birth prevalence and early neonatal mortality data for all subnational locations of China. The National Birth Defects Prevention Network (NBDPN) reports birth prevalence estimates as compiled by a number of subnational registries within the United States. The Birth Defects Registry of India (BDRI) reports congenital anomalies from participating hospitals within India.*

*Inpatient hospital and MarketScan claims data for all congenital anomalies causes and sub-cause models was prepped centrally by the GBD research team. The inpatient hospital data was adjusted for multiple inpatient visits by individuals and for the correction of primary diagnoses to all diagnoses including the congenital ICD codes. For more information on the preparation of these data sources, see elsewhere in this appendix.*

## *Modeling Strategy: Overview*

*All available input data was utilized in a series DisMod-MR models in order to estimate the prevalence of each category of congenital anomalies across the full life course for each location/age/sex combination. Incidence was set to 0 for all congenital models, as congenital conditions occur at the time of birth and by definition there are no incident cases after birth. Remission was allowed only in the models of a select subset of causes for which surgical intervention or spontaneous remission can completely eliminate the disability due to that congenital condition: namely, cleft lip and/or palate, polydactyly and syndactyly, and ventricular septal defect and atrial septal defect. Cause-specific priors and slope priors were used to guide biologically plausible DisMod-MR estimates of excess mortality and remission where applicable. For a subset of conditions, a decreasing slope prior on excess mortality rate was applied to capture the highest risk of mortality from congenital conditions in the neonatal age groups and a subsequent decreasing risk of mortality from congenital conditions later in life. Excess mortality was set to zero after 70 years of age in all models, in keeping with the GBD cause of death estimates for all congenital causes.*

*For each of congenital heart, musculoskeletal and gastrointestinal anomalies, we used as DisMod-MR model to estimate the total prevalence of all conditions within that cause category. We then squeezed the sum of the specific sub-cause prevalence estimates to these total prevalence estimates in order to ensure internal consistency of our cause-level and sub-cause estimates. We used age- and sex-specific prevalence ratios derived from the MarketScan inpatient claims data to split off a proportion of other heart, musculoskeletal, and gastrointestinal anomalies from the total estimates for each cause.*

## *Study-level Covariates*

*A number of the input data sources used for the estimation of congenital birth defects are known to have biases leading to under-reporting or over-reporting relative to the true prevalence of congenital anomalies among live births and all subsequent age groups. We used study-level covariates in the each of the DisMod-MR models to adjust for these under-reporting and over-reporting biases.*

*Where necessary, we used a study-level covariate to adjust for the inclusion of stillbirths in the reported birth prevalence estimates in literature and registry data sources, as stillbirths are not included in our*

*case definition of prevalence among live births. We also used a study-level covariate to adjust for data sources that included terminations of pregnancy in their birth prevalence estimates. In all models except for the chromosomal conditions, we also used a study-level covariate to adjust for under-reporting in data sources that were extracted to exclude co-occurring chromosomal conditions from the reported prevalence estimates.*

*For a subset of congenital causes, particularly the congenital heart defects, we noted substantial differences in the lists of case definitions being reported to the various congenital registries. Across all types of congenital heart defects, the National Birth Defects Prevention Network (NBDPN) had the most complete list of reported case definitions – ie, the highest case ascertainment – and was considered the gold standard among all birth registry data sources. We used registry-specific crosswalks to adjust all other birth defects registries to match the case ascertainment seen in the NBDPN.*

*We also included a series of study-level covariates to adjust for under-reporting in the inpatient hospital data and Marketscan claims data. This included one study-level covariate used specifically to adjust the 2010 inpatient Marketscan data and another used specifically to adjust the 2012 Marketscan data to the reference literature and registry data sources.*

### *Country-level Covariates*

*Country-level covariates were used in each of the congenital DisMod-MR models based on literature information about the risk factors for these birth defects. Folic acid availability was used as a covariate on prevalence for all neural tube defects models and a subset of the congenital musculoskeletal anomalies models. The legality of abortion was used as a covariate on prevalence for conditions in which prenatal diagnosis is commonly available and the prognosis is severe enough to cause high rate of termination of pregnancy following prenatal diagnosis: these include all chromosomal conditions and a subset of the congenital heart defects. Maternal consumption of alcohol during pregnancy, as a proportion of all pregnancies, was used as a covariate on prevalence for all congenital heart defects. The proportion of live births by mothers age 35+ was used as a covariate on all chromosomal models.*

*Across many of the congenital models, the Health Access and Quality Index covariate was used to guide the global pattern of with-condition mortality and excess mortality, as was the natural log of the lag-distributed income per capita (lnLDI). For most of the severe congenital conditions, the mortality associated with the condition is highly dependent on access to adequate surgical interventions and other medical care during the first hours, weeks, and years of life.*

### *Assigning health states and sequelae for long-term outcomes*

*To determine the distribution of health outcomes associated with the congenital causes, we performed a review of available literature on the long-term health outcomes of survivors in cohorts born with each type of congenital malformation. For conditions requiring surgical intervention shortly after birth to ensure survival, the health states included in the disability weight calculations correspond to the post-surgery outcomes reported in cohorts of individuals born with these life-threatening congenital conditions. Where data was available on from multiple cohorts, we pooled these cohorts together to calculate the proportion of individuals with each health state. Where data on the joint distribution of the long-term health outcomes was not available, we assumed independence of each long-term health outcome. Combined disability weights were calculated for all necessary combinations of existing disability weights.*

## Case definitions and modeling strategy specifics

### Neural tube defects

#### Case definitions

Neural tube defects occur when neural tube fails to close completely during development. The GBD 2016 case definition includes spina bifida, in which part of the spinal cord and/or meninges are uncovered by skin; encephalocele, a congenital defect characterized by sac-like protrusions of the brain and meninges through openings in the skull; and anencephaly, the absence of a major portion of the brain, skull, and scalp. Spina bifida occulta, a much less severe form of spina bifida where the defect in vertebral column remains covered by skin, is excluded from the GBD case definition of spina bifida. All infants born with anencephaly die during the first few weeks of life, as there is no remission and no cure for this condition. Infants born with spina bifida or encephalocele typically require surgical intervention during the first few weeks of life, and thereafter may experience a range of neural and motor complications. Our case definitions of spina bifida and encephalocele do not consider surgical intervention for either condition as remission. In GBD 2016, spina bifida, encephalocele, and anencephaly are each modeled separately and then fit to a total model of all neural tube defects. Spina bifida corresponds to the ICD-10 codes Q05.0, Q05.4, Q05.6, Q05.7, Q05.8, and Q05.9. Encephalocele corresponds to the ICD-10 codes Q01.2, Q01.8, and Q01.9. Anencephaly corresponds to the ICD-10 codes Q00.0 and Q00.2.

#### Health states associated with neural tube defects

All infants with anencephaly are assigned the health state of severe motor and cognitive impairment. Cases of spina bifida and encephalocele are split into every combination of mild, moderate and severe motor impairment, all severities of intellectual disability, and urinary incontinence. These proportions were calculated using a pooled analysis of available literature on the long-term outcomes in cohorts of individuals born with each sub-type of neural tube defects. The distribution of health states associated with encephalocele (references: NIDs 292406, 292320, and 292322) was derived separately from the distribution of health states associated with spina bifida (references: NIDs 292324 and 292327), although these two categories of neural tube defects are associated with the same list of long-term outcome sequela.

#### Neural tube defects overall modeling strategy and model settings

In order to ensure internal consistency of the estimates of each sub-type of neural tube defects, we developed a model of the total prevalence of neural tube defects and used these location, year, sex and age-specific prevalence estimates to scale the estimates of anencephaly, encephalocele and spina bifida prevalence. This modeling strategy allowed us to incorporate the cause-specific mortality estimates from the GBD 2016 Cause of Death analysis and also allowed us to use literature data where the prevalence and mortality estimates were reported for the total of all neural tube defects only.

The DisMod-MR model of total neural tube defects used cause-specific mortality (CSMR) estimates from the GBD cause of death analysis for neural tube defects. This model had a minimum excess mortality of 3.0 for the first week of age and a decreasing slope prior on excess mortality rate for all ages as the risk of death due to neural tube defects is greatest shortly after birth. The model also used an increased smoothness (maximum  $\xi=1$ ) on excess mortality rate in order to allow high excess mortality in the early neonatal age group. Random effects on prevalence were limited to  $\pm 0.5$  in order to limit geographic variation in the estimated birth prevalence.

### **Anencephaly modeling strategy and model settings**

The life expectancy for infants born with anencephaly is on the order of hours or days; none of these infants survive past the neonatal age period. Because of the extremely high excess mortality associated with this condition and the short age range over which the prevalence varies, we used a custom modeling process to estimate the prevalence of anencephaly. We first used DisMod-MR to model the prevalence of anencephaly at birth for every location, year, age and sex combination. We then used literature data on outcomes largest available cohort of infants born with anencephaly (references: NID 294812 and NID 296668)), using the precise time of death information from this cohort to create a life table that applied the high excess mortality rates to all cases of anencephaly at birth.

We applied these mortality rates to both sex and all locations, generating the time lived by infants with anencephaly during the early and late neonatal age groups by location, year and sex. We then used GBB 2016 mortality estimates to calculate the time lived by all infants during the early and late neonatal age groups by location, year and sex, and used these two values to calculate the prevalence of anencephaly in the early and late neonatal age groups; after one month of age, all available literature indicates that no infants born with anencephaly are still alive.

The DisMod-MR model for the birth prevalence of anencephaly has random effects on prevalence limited to  $\pm 1$ . As this model was designed to estimate only the prevalence at birth, incidence, remission and excess mortality were set to zero for all ages, and the only age mesh points were 0 and 100 years of age.

### **Encephalocele modeling strategy and model settings**

The DisMod-MR model for encephalocele had a minimum excess mortality of 5.0 for the first week of age and a decreasing slope prior on excess mortality rate for all ages. The model also used an increased smoothness on excess mortality rate (maximum  $\xi=1$ ). Random effects on prevalence were limited to  $\pm 0.5$  as we expect limited geographic variation in the birth prevalence of encephalocele.

### **Spina bifida modeling strategy and model settings**

The DisMod-MR model for spina bifida had a minimum excess mortality of 3.0 for the first week of age, a decreasing slope prior on excess mortality rate for all ages, and a maximum smoothness on excess mortality rate of  $\xi=1$ . Random effects on prevalence were also limited to  $\pm 0.5$ .

### **Covariates used in the DisMod-MR total neural tube defects model**

| <b>Covariate name</b>      | <b>Type</b>             | <b>Measure</b>        | <b>Beta value</b>        | <b>Exponentiated value</b> |
|----------------------------|-------------------------|-----------------------|--------------------------|----------------------------|
| Folic acid unadjusted (ug) | Country covariate       | Prevalence            | -0.000 (-0.000 - -0.000) | 1.000 (1.000 - 1.000)      |
| LDI (I\$ per capita)       | Country covariate       | Excess mortality rate | -0.101 (-0.104 - -0.100) | 0.904 (0.901 - 0.905)      |
| All MarketScan, year 2010  | Study-level x-covariate | Prevalence            | -1.040 (-1.108 - -0.975) | 0.353 (0.330 - 0.377)      |

|                                              |                         |            |                          |                       |
|----------------------------------------------|-------------------------|------------|--------------------------|-----------------------|
| All MarketScan, year 2012                    | Study-level x-covariate | Prevalence | -1.023 (-1.096 - -0.958) | 0.359 (0.334 - 0.384) |
| Chromosomal diagnoses excluded               | Study-level x-covariate | Prevalence | -0.298 (-0.300 - -0.292) | 0.742 (0.741 - 0.746) |
| Hospital data for ages over 1 year only      | Study-level x-covariate | Prevalence | -0.252 (-0.256 - -0.250) | 0.778 (0.774 - 0.779) |
| Hospital data for the under-1 year age group | Study-level x-covariate | Prevalence | 0.249 (0.247 - 0.250)    | 1.283 (1.280 - 1.284) |
| Stillbirths included as cases                | Study-level x-covariate | Prevalence | 0.298 (0.296 - 0.300)    | 1.348 (1.345 - 1.349) |
| Terminations of pregnancy included as cases  | Study-level x-covariate | Prevalence | 0.008 (0.000 - 0.028)    | 1.008 (1.000 - 1.028) |
| Under Reported                               | Study-level x-covariate | Prevalence | -0.003 (-0.013 - -0.000) | 0.997 (0.987 - 1.000) |

- Covariates used in the DisMod-MR birth prevalence model of anencephaly

| Covariate name                              | Type                    | Measure    | Beta value               | Exponentiated value   |
|---------------------------------------------|-------------------------|------------|--------------------------|-----------------------|
| Folic acid unadjusted (ug)                  | Country covariate       | Prevalence | -0.004 (-0.048 - -0.000) | 0.996 (0.954 - 1.000) |
| Legality of Abortion                        | Country covariate       | Prevalence | -0.014 (-0.018 - -0.000) | 0.986 (0.982 - 1.000) |
| Chromosomal diagnoses excluded              | Study-level x-covariate | Prevalence | -0.156 (-0.254 - -0.000) | 0.855 (0.776 - 1.000) |
| Hospital Inpatient                          | Study-level x-covariate | Prevalence | -0.420 (-0.583 - -0.001) | 0.657 (0.558 - 0.999) |
| Stillbirths included as cases               | Study-level x-covariate | Prevalence | 0.797 (0.251 - 0.942)    | 2.220 (1.286 - 2.564) |
| Terminations of pregnancy included as cases | Study-level x-covariate | Prevalence | 0.184 (0.001 - 0.378)    | 1.203 (1.001 - 1.459) |
| Folic acid unadjusted (ug)                  | Country covariate       | Prevalence | -0.004 (-0.048 - -0.000) | 0.996 (0.954 - 1.000) |

**Covariates used in the DisMod-MR model of encephalocele**

| Covariate name                      | Type              | Measure                       | Beta value               | Exponentiated value   |
|-------------------------------------|-------------------|-------------------------------|--------------------------|-----------------------|
| Folic acid unadjusted (ug)          | Country covariate | Prevalence                    | -0.002 (-0.037 - -0.000) | 0.998 (0.963 - 1.000) |
| Healthcare access and quality index | Country covariate | With-condition mortality rate | -0.005 (-0.018 - -0.000) | 0.995 (0.982 - 1.000) |
| LDI (I\$ per capita)                | Country covariate | Excess mortality rate         | -0.626 (-0.996 - -0.250) | 0.535 (0.370 - 0.779) |



|                                              |                         |            |                          |                       |
|----------------------------------------------|-------------------------|------------|--------------------------|-----------------------|
| Legality of Abortion                         | Country covariate       | Prevalence | -0.008 (-0.011 - -0.000) | 0.992 (0.989 - 1.000) |
| All MarketScan, year 2010                    | Study-level x-covariate | Prevalence | -0.712 (-0.877 - -0.130) | 0.491 (0.416 - 0.878) |
| All MarketScan, year 2012                    | Study-level x-covariate | Prevalence | -0.681 (-0.844 - -0.118) | 0.506 (0.430 - 0.888) |
| Chromosomal diagnoses excluded               | Study-level x-covariate | Prevalence | -0.284 (-0.300 - -0.004) | 0.752 (0.741 - 0.996) |
| Hospital data for ages over 1 year only      | Study-level x-covariate | Prevalence | -0.089 (-0.166 - -0.002) | 0.915 (0.847 - 0.998) |
| Hospital data for the under-1 year age group | Study-level x-covariate | Prevalence | -0.024 (-0.285 - -0.000) | 0.976 (0.752 - 1.000) |
| Stillbirths included as cases                | Study-level x-covariate | Prevalence | 0.267 (0.005 - 0.299)    | 1.306 (1.005 - 1.349) |
| Terminations of pregnancy included as cases  | Study-level x-covariate | Prevalence | 0.110 (0.005 - 0.246)    | 1.116 (1.005 - 1.279) |

#### Covariates used in the DisMod-MR model of spina bifida

| Covariate name                               | Type                    | Measure                       | Beta value               | Exponentiated value   |
|----------------------------------------------|-------------------------|-------------------------------|--------------------------|-----------------------|
| Folic acid unadjusted (ug)                   | Country covariate       | Prevalence                    | -0.002 (-0.029 - -0.000) | 0.998 (0.971 - 1.000) |
| Healthcare access and quality index          | Country covariate       | With-condition mortality rate | -0.013 (-0.059 - -0.001) | 0.987 (0.942 - 0.999) |
| LDI (I\$ per capita)                         | Country covariate       | Excess mortality rate         | -0.625 (-1.000 - -0.250) | 0.535 (0.368 - 0.779) |
| Legality of Abortion                         | Country covariate       | Prevalence                    | -0.007 (-0.009 - -0.000) | 0.993 (0.991 - 1.000) |
| All MarketScan, year 2010                    | Study-level x-covariate | Prevalence                    | -1.114 (-1.249 - -0.880) | 0.328 (0.287 - 0.415) |
| All MarketScan, year 2012                    | Study-level x-covariate | Prevalence                    | -1.081 (-1.211 - -0.869) | 0.339 (0.298 - 0.419) |
| Chromosomal diagnoses excluded               | Study-level x-covariate | Prevalence                    | -0.287 (-0.300 - -0.000) | 0.750 (0.741 - 1.000) |
| Hospital data for ages over 1 year only      | Study-level x-covariate | Prevalence                    | -0.006 (-0.019 - -0.000) | 0.994 (0.981 - 1.000) |
| Hospital data for the under-1 year age group | Study-level x-covariate | Prevalence                    | -0.004 (-0.012 - -0.000) | 0.996 (0.988 - 1.000) |
| Stillbirths included as cases                | Study-level x-covariate | Prevalence                    | 0.011 (0.001 - 0.039)    | 1.011 (1.001 - 1.040) |

## Congenital heart anomalies

### Case definitions

There are many distinct types of congenital heart anomalies with a range of anatomical patterns, severities, and requirements for medical treatment. For the purposes of estimating nonfatal outcomes, in GBD 2016 congenital heart anomalies were split into five-sub categories based on both the anatomical characteristics and the treatment requirements of each condition.

The first sub-cause category, single ventricle and single ventricle pathway defects include tricuspid atresia, hypoplastic left heart syndrome, mitral valve atresia, single left ventricle, double outlet right ventricle, and pulmonary atresia; the corresponding ICD-10 codes are Q20.1, Q20.2, Q20.4, Q22.4, Q22.6 and Q23.4. Each of the single ventricle and single ventricle pathway conditions requires surgical intervention shortly after birth to ensure infant survival.

The second sub-cause category, severe congenital heart defects excluding single ventricle and single ventricle pathway defects, includes common arterial trunk, common truncus, discordant ventriculoarterial connection, transposition of great vessels, atrioventricular septal defect, endocardial cushion defect, Tetralogy of fallot, aortopulmonary septal defect, pulmonary valve atresia, congenital stenosis of aortic valve, and total anomalous pulmonary venous connection. This category of severe congenital heart defects includes ICD-10 codes Q20.0; Q20.3; Q21.2; Q21.3; Q21.4; Q22.0; Q23.0 and Q26.2.

The third sub-cause category is critical malformations of great vessels, congenital valvular heart disease and patent ductus arteriosus. The malformations of vessels and valves in this sub-cause category include Ebstein's anomaly, congenital pulmonary valve stenosis, pulmonary valve insufficiency, other malformations of the pulmonary valve, malformations of the tricuspid valve, tricuspid atresia or stenosis, insufficiency of the aortic valve, mitral stenosis or insufficiency, and other malformations of aortic and mitral valves. Patent ductus arteriosus cases are only included among infants of >37 weeks gestational age, as premature infants often have minor patent ductus arteriosus that closes shortly after birth. The ICD-10 codes corresponding to the critical malformations of great vessels category include Q22.1, Q22.2, Q22.3, Q22.5, Q22.8, Q22.9, Q23.1, Q23.2, Q23.3, Q23.8, Q23, Q25.1, Q25.2, Q25.3, Q25.4, Q25.5, and Q25.0. The majority of these conditions require medical attention shortly within the first few weeks of life.

The fourth sub-cause category, ventricular septal defects and atrial septal defects, includes holes in the walls separating the chambers of the heart. Many of these septal defects close spontaneously, while other require surgical care. The ICD-10 codes corresponding to ventricular septal defect and atrial septal defect are Q21.0 and Q21.1, respectively.

The fifth and final sub-cause category of congenital heart defects is other congenital cardiovascular anomalies, which correspond to ICD-10 codes Q27, Q27.1, Q27.2, Q27.3, Q27.30, Q27.31, Q27.32, Q27.33, Q27.34, Q27.39, Q27.4, Q27.8, Q27.9, Q28, Q28.0, Q28.1, Q28.2, Q28.3, Q28.8 and Q28.9.

### Health states associated with congenital heart anomalies

Every case of congenital heart defects was associated with a health state of congenital heart disease, except for a proportion of ventricular and atrial septal defects which are considered asymptomatic. All congenital heart defects cases were split into a proportion without intellectual disability and a proportion with every severity from borderline to profound intellectual disability. The proportion of congenital heart anomalies cases experiencing each severity of intellectual disability were calculated using available literature sources on the prevalence and severity of intellectual disability in congenital heart defect populations (references: NIDs 292230, 292237 and 292240). The proportion of VSD/ASD cases attributed to the asymptomatic category was derived from literature sources on the long-term outcomes of patients

diagnosed with septal defects at birth (references: NIDs 261403, 292273 and 292275). GBD estimates of congenital heart failure were assigned to the congenital heart defect categories according to the proportion of total congenital heart cause-specific mortality assigned to each category of congenital heart defects.

## **Modeling strategy and model settings**

In order to ensure internally consistent estimates of the prevalence of congenital heart anomalies, we developed a model of the total prevalence of congenital heart anomalies and fit the estimates of each sub-type of congenital heart anomalies proportionally to these total envelope estimates. The prevalence estimates of other congenital heart anomalies were derived as proportions of the total congenital heart estimates, using age- and sex-specific proportions from Marketscan claims data.

The National Birth Defects Prevention Network (NBDPN), the United States state-level birth defects reporting system, includes the most comprehensive case reporting of any registry data source. As reported in the tables below, the congenital heart models each used registry-specific study-level covariate crosswalks to adjust input data from all other birth registries upward according to the composition of cases included in the NBDPN. All hospital and Marketscan data were also adjusted using study-level covariates with the NBDPN and literature prevalence values as the reference data.

### **Total congenital heart anomalies model settings**

In the DisMod model of total congenital heart anomalies, random effects on prevalence were limited to  $\pm 0.5$  in order to limit geographic variation in the estimates of birth prevalence. The model included a decreasing slope prior on excess mortality rate for all ages, as the risk of death due to congenital heart anomalies is greatest shortly after birth. The minimum excess mortality rate for the neonatal age range was set to 5.0. The smoothness on excess mortality rate was increased to  $\lambda_i=5.0$  in order to allow high excess mortality in the neonatal age groups and lower excess mortality rates in older ages.

During model development, all registry prevalence values below the threshold of 3 per 1,000 were marked with a study-level covariate to indicate under-reporting, regardless of whether a comprehensive list of ICD codes or cases was included in the input data. These under-reported data sources were then adjusted upwards to the reference data.

### **Single ventricle and single ventricle pathway defects model settings**

In the DisMod model of single ventricle and single ventricle pathway heart defects, random effects on prevalence were limited to  $\pm 0.5$  in order to limit the estimated geographic variation in birth prevalence. A minimum excess mortality rate of 10.0 was set for the early neonatal period in order to capture the high mortality risk, based on expert priors and a review available literature on the mortality risk among infants born with single ventricle and single ventricle pathway heart defects. The smoothness on excess mortality rate was set to 5.0 in order to fit steep changes in the excess mortality rate during the first weeks of life, and a decreasing slope prior on excess mortality rate was applied to all ages, as the risk of death due to these congenital heart anomalies is greatest shortly after birth and diminishes over the life course.

### **Severe congenital heart defects excluding single ventricle and single ventricle pathway defects model settings**

In the DisMod model of congenital heart defects excluding single ventricle and single ventricle pathway defects, random effects on prevalence were limited to  $\pm 0.5$ . A minimum excess mortality rate of 5.0 for the early neonatal period was enforced in order to capture the high risk of mortality associated with these conditions, and a decreasing slope prior on excess mortality rate was applied for all ages. The smoothness on excess mortality rate was set to  $\text{Xi} = 1.0$  in order to allow the model to fit steep changes in the mortality rate of these conditions in the neonatal age period.

### **Critical malformations of great vessels, congenital valvular heart disease and patent ductus arteriosus model settings**

In the DisMod model of critical malformations of great vessels, congenital valvular heart disease and patent ductus arteriosus, random effects on prevalence were limited to  $\pm 0.5$ . A minimum excess mortality rate of 5.0 was set for the early neonatal period in order to capture the high mortality risk associated with these conditions. A decreasing slope prior was applied to excess mortality rate for all ages, as the risk of death due to congenital heart anomalies is highest shortly after birth. The smoothness on excess mortality was increased to  $\text{Xi} = 3.0$  in order to fit steep changes in the mortality associated with these conditions during and after the neonatal period.

### **Ventricular septal defects and atrial septal defects model settings**

In the DisMod model of ventricular septal defects and atrial septal defects (VSD/ASD), remission was set to zero for all ages. Cases of septal defects that spontaneously close over time were considered as part of the asymptomatic proportion of VSD/ASD rather than remitted cases. Random effects on prevalence were limited to  $\pm 0.3$  in order to limit the random geographic variation in the estimated birth prevalence. No minimum excess mortality rate was set in this model, as VSD/ASD cases are not associated with excess mortality rates as high as the other subtypes of congenital heart defects. The smoothness on excess mortality rate was set to  $\text{Xi}=1.0$ , and a decreasing slope prior was set on excess mortality rate for all ages.

Covariates used in the DisMod-MR model of total congenital heart anomalies

| Covariate name                                             | Type                    | Measure               | Beta value               | Exponentiated value   |
|------------------------------------------------------------|-------------------------|-----------------------|--------------------------|-----------------------|
| Healthcare access and quality index                        | Country covariate       | Prevalence            | 0.005 (0.003 - 0.011)    | 1.005 (1.003 - 1.011) |
| LDI (I\$ per capita)                                       | Country covariate       | Excess mortality rate | -0.999 (-1.250 - -0.752) | 0.368 (0.287 - 0.472) |
| Maternal alcohol consumption during pregnancy (proportion) | Country covariate       | Prevalence            | 0.479 (0.398 - 0.499)    | 1.614 (1.489 - 1.647) |
| Chromosomal diagnoses excluded                             | Study-level x-covariate | Prevalence            | -0.009 (-0.021 - -0.001) | 0.991 (0.979 - 0.999) |
| Hospital data for ages over 1 year only                    | Study-level x-covariate | Prevalence            | -0.000 (-0.002 - -0.000) | 1.000 (0.998 - 1.000) |
| Hospital data for the under-1 year age group               | Study-level x-covariate | Prevalence            | -0.080 (-0.133 - -0.034) | 0.923 (0.876 - 0.967) |
| ICDBSR to NBDPN registry case composition adjustment       | Study-level x-covariate | Prevalence            | -1.168 (-1.212 - -1.122) | 0.311 (0.298 - 0.326) |
| Stillbirths included as cases                              | Study-level x-covariate | Prevalence            | 0.001 (0.000 - 0.003)    | 1.001 (1.000 - 1.003) |
| Terminations of pregnancy included as cases                | Study-level x-covariate | Prevalence            | 0.000 (0.000 - 0.002)    | 1.000 (1.000 - 1.002) |
| Under Reported                                             | Study-level x-covariate | Prevalence            | -0.910 (-0.942 - -0.873) | 0.403 (0.390 - 0.418) |
| World Atlas to NBDPN registry case composition adjustment  | Study-level x-covariate | Prevalence            | -1.458 (-1.512 - -1.404) | 0.233 (0.220 - 0.246) |
| Healthcare access and quality index                        | Country covariate       | Prevalence            | 0.005 (0.003 - 0.011)    | 1.005 (1.003 - 1.011) |
| LDI (I\$ per capita)                                       | Country covariate       | Excess mortality rate | -0.999 (-1.250 - -0.752) | 0.368 (0.287 - 0.472) |
| Maternal alcohol consumption during pregnancy (proportion) | Country covariate       | Prevalence            | 0.479 (0.398 - 0.499)    | 1.614 (1.489 - 1.647) |

Covariates used in the DisMod-MR model of single ventricle and single ventricle pathway defects

| Covariate name                                             | Type              | Measure               | Beta value               | Exponentiated value   |
|------------------------------------------------------------|-------------------|-----------------------|--------------------------|-----------------------|
| LDI (I\$ per capita)                                       | Country covariate | Excess mortality rate | -0.750 (-1.000 - -0.507) | 0.472 (0.368 - 0.602) |
| Maternal alcohol consumption during pregnancy (proportion) | Country covariate | Prevalence            | 0.061 (0.001 - 0.204)    | 1.063 (1.001 - 1.227) |

|                                                       |                         |                               |                          |                       |
|-------------------------------------------------------|-------------------------|-------------------------------|--------------------------|-----------------------|
| All MarketScan, year 2010                             | Study-level x-covariate | Prevalence                    | -0.025 (-0.093 - -0.001) | 0.975 (0.912 - 0.999) |
| All MarketScan, year 2012                             | Study-level x-covariate | Prevalence                    | -0.023 (-0.079 - -0.001) | 0.977 (0.924 - 0.999) |
| Chromosomal diagnoses excluded                        | Study-level x-covariate | Prevalence                    | -0.084 (-0.191 - -0.002) | 0.919 (0.826 - 0.998) |
| EUROCAT to NBDPN registry case composition adjustment | Study-level x-covariate | Prevalence                    | -0.989 (-1.000 - -0.953) | 0.372 (0.368 - 0.386) |
| Hospital data for ages over 1 year only               | Study-level x-covariate | Prevalence                    | -0.001 (-0.004 - -0.000) | 0.999 (0.996 - 1.000) |
| Hospital data for the under-1 year age group          | Study-level x-covariate | Prevalence                    | -0.449 (-0.725 - -0.316) | 0.638 (0.484 - 0.729) |
| Stillbirths included as cases                         | Study-level x-covariate | Prevalence                    | 0.004 (0.000 - 0.012)    | 1.004 (1.000 - 1.012) |
| Terminations of pregnancy included as cases           | Study-level x-covariate | Prevalence                    | 0.058 (0.003 - 0.146)    | 1.060 (1.003 - 1.157) |
| Under Reported                                        | Study-level x-covariate | Prevalence                    | -0.994 (-1.000 - -0.979) | 0.370 (0.368 - 0.376) |
| Under Reported                                        | Study-level z-covariate | With-condition mortality rate | 1.530 (1.256 - 1.856)    | 4.620 (3.511 - 6.398) |

Covariates used in the DisMod-MR model of severe congenital heart defects excluding single ventricle and single ventricle pathway defects

| Covariate name                                             | Type                    | Measure                       | Beta value               | Exponentiated value   |
|------------------------------------------------------------|-------------------------|-------------------------------|--------------------------|-----------------------|
| Healthcare access and quality index                        | Country covariate       | With-condition mortality rate | -0.019 (-0.056 - -0.001) | 0.981 (0.946 - 0.999) |
| LDI (I\$ per capita)                                       | Country covariate       | Excess mortality rate         | -0.628 (-0.993 - -0.255) | 0.534 (0.370 - 0.775) |
| Maternal alcohol consumption during pregnancy (proportion) | Country covariate       | Prevalence                    | 0.121 (0.004 - 0.341)    | 1.128 (1.004 - 1.406) |
| Chromosomal diagnoses excluded                             | Study-level x-covariate | Prevalence                    | -0.270 (-0.299 - -0.192) | 0.764 (0.741 - 0.826) |
| EUROCAT to NBDPN registry case composition adjustment      | Study-level x-covariate | Prevalence                    | -0.995 (-1.000 - -0.979) | 0.370 (0.368 - 0.376) |
| Hospital data for ages over 1 year only                    | Study-level x-covariate | Prevalence                    | -0.001 (-0.006 - -0.000) | 0.999 (0.994 - 1.000) |
| Hospital data for the under-1 year age group               | Study-level x-covariate | Prevalence                    | -0.018 (-0.089 - -0.000) | 0.982 (0.915 - 1.000) |

|                                                           |                         |            |                          |                       |
|-----------------------------------------------------------|-------------------------|------------|--------------------------|-----------------------|
| ICDBSR to NBDPN registry case composition adjustment      | Study-level x-covariate | Prevalence | -0.885 (-0.993 - -0.782) | 0.413 (0.371 - 0.458) |
| Stillbirths included as cases                             | Study-level x-covariate | Prevalence | 0.003 (0.000 - 0.012)    | 1.003 (1.000 - 1.012) |
| Terminations of pregnancy included as cases               | Study-level x-covariate | Prevalence | 0.012 (0.000 - 0.042)    | 1.012 (1.000 - 1.043) |
| Under Reported                                            | Study-level x-covariate | Prevalence | -0.844 (-0.962 - -0.749) | 0.430 (0.382 - 0.473) |
| World Atlas to NBDPN registry case composition adjustment | Study-level x-covariate | Prevalence | -0.994 (-1.000 - -0.973) | 0.370 (0.368 - 0.378) |

Covariates used in the DisMod-MR model of critical malformations of great vessels, congenital valvular heart disease and patent ductus arteriosus

| Covariate name                                             | Type                    | Measure                       | Beta value               | Exponentiated value   |
|------------------------------------------------------------|-------------------------|-------------------------------|--------------------------|-----------------------|
| Healthcare access and quality index                        | Country covariate       | With-condition mortality rate | -0.035 (-0.075 - -0.002) | 0.965 (0.928 - 0.998) |
| LDI (I\$ per capita)                                       | Country covariate       | Excess mortality rate         | -0.273 (-0.500 - -0.055) | 0.761 (0.607 - 0.946) |
| Maternal alcohol consumption during pregnancy (proportion) | Country covariate       | Prevalence                    | 0.310 (0.002 - 0.493)    | 1.364 (1.002 - 1.637) |
| All MarketScan, year 2010                                  | Study-level x-covariate | Prevalence                    | -0.003 (-0.010 - -0.000) | 0.997 (0.990 - 1.000) |
| All MarketScan, year 2012                                  | Study-level x-covariate | Prevalence                    | -0.006 (-0.030 - -0.000) | 0.994 (0.971 - 1.000) |
| Chromosomal diagnoses excluded                             | Study-level x-covariate | Prevalence                    | -0.226 (-0.297 - -0.058) | 0.797 (0.743 - 0.944) |
| EUROCAT to NBDPN registry case composition adjustment      | Study-level x-covariate | Prevalence                    | -0.908 (-0.999 - -0.748) | 0.403 (0.368 - 0.473) |
| Hospital data for ages over 1 year only                    | Study-level x-covariate | Prevalence                    | -0.004 (-0.019 - -0.000) | 0.996 (0.981 - 1.000) |
| Hospital data for the under-1 year age group               | Study-level x-covariate | Prevalence                    | -0.075 (-0.625 - -0.001) | 0.928 (0.535 - 0.999) |
| ICDBSR to NBDPN registry case composition adjustment       | Study-level x-covariate | Prevalence                    | -0.997 (-1.000 - -0.989) | 0.369 (0.368 - 0.372) |
| Stillbirths included as cases                              | Study-level x-covariate | Prevalence                    | 0.002 (0.000 - 0.007)    | 1.002 (1.000 - 1.007) |
| Terminations of pregnancy included as cases                | Study-level x-covariate | Prevalence                    | 0.039 (0.001 - 0.129)    | 1.040 (1.001 - 1.138) |

|                                                           |                         |                               |                          |                       |
|-----------------------------------------------------------|-------------------------|-------------------------------|--------------------------|-----------------------|
| Under Reported                                            | Study-level x-covariate | Prevalence                    | -0.985 (-0.999 - -0.944) | 0.373 (0.368 - 0.389) |
| World Atlas to NBDPN registry case composition adjustment | Study-level x-covariate | Prevalence                    | -0.993 (-1.000 - -0.970) | 0.371 (0.368 - 0.379) |
| Under Reported                                            | Study-level z-covariate | With-condition mortality rate | 1.400 (1.145 - 1.706)    | 4.056 (3.142 - 5.507) |

#### Covariates used in the DisMod-MR model of ventricular septal defects and atrial septal defects

| Covariate name                                             | Type                    | Measure                       | Beta value               | Exponentiated value   |
|------------------------------------------------------------|-------------------------|-------------------------------|--------------------------|-----------------------|
| Healthcare access and quality index                        | Country covariate       | With-condition mortality rate | -0.002 (-0.009 - -0.000) | 0.998 (0.991 - 1.000) |
| LDI (I\$ per capita)                                       | Country covariate       | Excess mortality rate         | -0.025 (-0.050 - 0.000)  | 0.975 (0.952 - 1.000) |
| Maternal alcohol consumption during pregnancy (proportion) | Country covariate       | Prevalence                    | 0.014 (0.001 - 0.051)    | 1.014 (1.001 - 1.052) |
| All MarketScan, year 2010                                  | Study-level x-covariate | Prevalence                    | -0.065 (-0.115 - -0.019) | 0.937 (0.892 - 0.982) |
| All MarketScan, year 2012                                  | Study-level x-covariate | Prevalence                    | -0.014 (-0.045 - -0.001) | 0.986 (0.956 - 0.999) |
| Hospital data for ages over 1 year only                    | Study-level x-covariate | Prevalence                    | -0.004 (-0.014 - -0.000) | 0.996 (0.986 - 1.000) |
| Hospital data for the under-1 year age group               | Study-level x-covariate | Prevalence                    | -0.005 (-0.017 - -0.000) | 0.995 (0.983 - 1.000) |
| Stillbirths included as cases                              | Study-level x-covariate | Prevalence                    | 0.017 (0.001 - 0.062)    | 1.017 (1.001 - 1.064) |
| Terminations of pregnancy included as cases                | Study-level x-covariate | Prevalence                    | 0.012 (0.001 - 0.049)    | 1.012 (1.001 - 1.050) |
| Under Reported                                             | Study-level x-covariate | Prevalence                    | -0.529 (-0.707 - -0.323) | 0.589 (0.493 - 0.724) |
| Healthcare access and quality index                        | Country covariate       | With-condition mortality rate | -0.002 (-0.009 - -0.000) | 0.998 (0.991 - 1.000) |



## Cleft lip & cleft palate (orofacial clefts)

### Case definition and associated health states

Orofacial clefts include isolated cleft lip, isolated cleft palate, and combined cleft lip and cleft palate. Cleft lip is an opening in the upper lip that may extend into the nose, and with cleft palate, the roof of the mouth contains an opening into the nose. Both conditions are the result of the tissues of the face not joining properly during development. These conditions can be successfully treated by surgery, which is typically done during the first few months or years of life but may occasionally be completed later in life. The sequelae associated with orofacial clefts are disfigurement level 1, disfigurement level 2, and disfigurement level 2 with speech problems. Additionally, a proportion of the population with orofacial clefts is considered to be asymptomatic. The proportion of cleft cases with associated speech problems was calculated following a review of available literature on orofacial cleft health outcomes (need source(s) from Nick?).

The GBD 2016 case definition of orofacial clefts includes isolated cleft palate, which corresponds to ICD-10 codes Q35.2, Q35.3, Q35.5, Q35.6, Q35.7, Q35.8, and Q35.9, and cleft palate with or without cleft lip, which corresponds to ICD-10 codes Q36.0, Q36.1, Q36.9, Q37.1, Q37.5, Q37.8, and Q37.9.

### Modeling strategy and model settings

The DisMod-MR model of orofacial clefts had random effects on prevalence limited to  $\pm 0.5$ , as we expected limited variation in birth prevalence of orofacial clefts. The model settings allow increased smoothness on both excess mortality rate and remission (maximum  $\xi = 5.0$ ) in order to fit steep changes in the rates mortality and remission during the first few years of life.

Incidence was set to zero for all ages. Remission was set to zero for the first three months of life, as cleft lip and/or palate are rarely corrected in the first few months of life. A maximum remission of 0.8 was set for ages three months to two years, the age range in which cleft repair is most commonly performed, allowing up to 75% of cleft cases to be repaired between three months and 2 years of age. Remission was bounded from 0 to 0.07 for ages 2 to 5 years, 0 to 0.004 for ages 5 to 20 years, then bounded from 0 to 0.002 for ages 20 to 50 years, and set at 0 for ages 50 years +. These limits on remission reflect our priors that up to 20% of remaining cleft cases are repaired between 2 and 5 years of age, another 5% may be repaired between 5 and 20 years of age, and a maximum 5% of remaining cases are surgically repaired between ages 20 and 50 years.

Priors on excess mortality rate were set at a maximum of 2.5 for the early neonatal period, 0.9 for the late neonatal period, 0.24 for the rest of the first year of life, 0.05 for ages 1 to 5 years, and was set to 0 for ages after 5 years. These limits on excess mortality reflect our priors that up to 5% of individuals with orofacial clefts die in the first week of life, up to 5% die in the following three weeks, up to 20% die in the next 11 months, another maximum of 20% before 5 years of ages, and a maximum of 5% of the remaining individuals die between ages 5 and 10 years.

During model development, all birth registry prevalence values below 2 per 10,000 were excluded as outliers, as these data are considered low enough to indicate severe under-reporting in the input data.

### Covariates used in the DisMod-MR model of orofacial clefts

| Covariate name | Type | Measure | Beta value | Exponentiated value |
|----------------|------|---------|------------|---------------------|
|----------------|------|---------|------------|---------------------|

|                                              |                         |                       |                          |                       |
|----------------------------------------------|-------------------------|-----------------------|--------------------------|-----------------------|
| Folic acid unadjusted (ug)                   | Country covariate       | Prevalence            | -0.000 (-0.000 - -0.000) | 1.000 (1.000 - 1.000) |
| Healthcare access and quality index          | Country covariate       | Prevalence            | -0.006 (-0.008 - -0.005) | 0.994 (0.992 - 0.995) |
| LDI (I\$ per capita)                         | Country covariate       | Excess mortality rate | -0.350 (-0.350 - -0.349) | 0.705 (0.705 - 0.705) |
| Chromosomal diagnoses excluded               | Study-level x-covariate | Prevalence            | -0.202 (-0.237 - -0.167) | 0.817 (0.789 - 0.846) |
| Hospital data for ages over 1 year only      | Study-level x-covariate | Prevalence            | 0.557 (0.505 - 0.607)    | 1.746 (1.656 - 1.835) |
| Hospital data for the under-1 year age group | Study-level x-covariate | Prevalence            | -0.192 (-0.242 - -0.144) | 0.825 (0.785 - 0.866) |
| Stillbirths included as cases                | Study-level x-covariate | Prevalence            | 0.176 (0.142 - 0.211)    | 1.192 (1.153 - 1.236) |
| Under Reported                               | Study-level x-covariate | Prevalence            | -0.519 (-0.592 - -0.454) | 0.595 (0.553 - 0.635) |

## Down Syndrome

### Case definition and associated health states

Down syndrome, also known as Trisomy 21, is the presence of a third copy of chromosome 21, typically caused by nondisjunction during the production of gametes. Down syndrome is associated with several specific physical characteristics, including decreased muscle tone, flat facial features, an upward slant to the eyes, abnormally shaped ears, a single deep crease across the center of the palm, folded skin on the inner corners of the eyes, and ability to extend joints beyond the usual, among others. The GBD 2016 case definition of Down syndrome includes ICD-10 codes Q90.0, Q90.1, Q90.2, and Q90.9.

Individuals with Down syndrome may have several combinations of sequelae: those included in the GBD sequelae list are intellectual disability, congenital heart disease, and dementia. The joint distribution of intellectual disability, congenital heart disease, and dementia associated with cases of Down Syndrome was derived from a review of literature on long-term outcomes in cohorts of Down Syndrome individuals. To calculate the severity distribution of intellectual disability due to Down Syndrome, we used literature values for the IQ distribution of individuals with Down Syndrome (reference: NID 149859) and calculated the area under the curve. We obtained age-specific proportions of individuals with Down Syndrome and dementia, and thus global age patterns were modeled to calculate the proportion of the population with each combination of sequelae for each of the following age ranges: 0-44 years, 45-49 years, 50-54 years, 55-69 years, 70-79 years, and 80+ years.

### Modeling strategy and model settings

The DisMod-MR model of Down Syndrome excluded all data with a prevalence of zero as outliers, as we expect that these low values are indicative of under-reporting in the data sources. The DisMod model used cause-specific mortality rate data from the corresponding Down Syndrome model in the GBD 2016 Cause of Death analysis, and converted these data to excess mortality rate estimates where matching prevalence data is available. Random effects on prevalence were limited to  $\pm 0.5$  and random effects on excess mortality rate are limited to  $\pm 1.0$  in order to limit the geographic variation in birth prevalence allowed in the model. The maximum smoothness on excess mortality rate was increased to  $x=2.0$  in order to fit the observed steep decline in the mortality risk associated with Down Syndrome after the neonatal age range.

Of note, the use of cause-specific mortality data in the nonfatal model of Down Syndrome is a substantial change in the modeling strategy as compared to the previous iterations of the GBD, and results in much better-informed excess mortality estimates driving the Down Syndrome prevalence estimates across the life course.

### Covariates used in the DisMod-MR model of Down Syndrome

| Covariate name               | Type              | Measure               | Beta value               | Exponentiated value   |
|------------------------------|-------------------|-----------------------|--------------------------|-----------------------|
| LDI (I\$ per capita)         | Country covariate | Excess mortality rate | -0.337 (-0.368 - -0.304) | 0.714 (0.692 - 0.738) |
| Legality of Abortion         | Country covariate | Prevalence            | -0.001 (-0.002 - -0.000) | 0.999 (0.998 - 1.000) |
| Live Births 35+ (proportion) | Country covariate | Prevalence            | 0.008 (0.001 - 0.025)    | 1.008 (1.001 - 1.025) |

|                                              |                         |                       |                          |                       |
|----------------------------------------------|-------------------------|-----------------------|--------------------------|-----------------------|
| Hospital data for ages over 1 year only      | Study-level x-covariate | Prevalence            | 0.140 (0.107 - 0.182)    | 1.151 (1.113 - 1.199) |
| Hospital data for the under-1 year age group | Study-level x-covariate | Prevalence            | 0.499 (0.497 - 0.500)    | 1.647 (1.644 - 1.649) |
| Stillbirths included as cases                | Study-level x-covariate | Prevalence            | -0.039 (-0.049 - -0.011) | 0.962 (0.952 - 0.989) |
| Terminations of pregnancy included as cases  | Study-level x-covariate | Prevalence            | -0.033 (-0.050 - 0.006)  | 0.968 (0.952 - 1.006) |
| LDI (I\$ per capita)                         | Country covariate       | Excess mortality rate | -0.337 (-0.368 - -0.304) | 0.714 (0.692 - 0.738) |
| Legality of Abortion                         | Country covariate       | Prevalence            | -0.001 (-0.002 - -0.000) | 0.999 (0.998 - 1.000) |

## Turner Syndrome

### Case definitions and associated health states

Turner syndrome, also known as 45 XO, is a condition in which a female is partly or completely missing an X chromosome. Turner syndrome can lead to a variety of medical and developmental problems, including short height, failure to start puberty, infertility, heart defects, learning disabilities, and difficulty with social adjustment. The GBD case definition of Turner syndrome includes ICD-10 codes Q96.0, Q96.3, and Q96.9. The sequelae associated with Turner syndrome are congenital heart disease, infertility, and the combination of both congenital heart disease and infertility; additionally, a subset of individuals with Turner syndrome are asymptomatic. The distribution of these sequelae was determined by a review of existing literature on the long-term health consequences of Turner Syndrome.

### Modeling strategy and model settings

One of the known limitations to the use of birth prevalence data on Turner Syndrome is that individuals with Turner Syndrome are commonly diagnosed later in life rather than prenatally or at birth. Thus, we implemented a correction factor to account for under-diagnosis in all birth registry data sources, using available literature on the trends in age pattern of Turner Syndrome diagnosis over time (source: NID 283283); although improvements in diagnoses have occurred over time, only between 15% and 30% of all diagnosed Turner Syndrome cases are diagnosed before one year of age. Additionally, the reported denominators from all birth registries – the number of live births in each registry catchment area – were adjusted to include only female births using the GBD fertility estimates of the age, year, and location-specific proportion of total live births that are female. Furthermore, all prevalence data with values of zero were excluded as outliers, as these low values indicate severe under-reporting in the input data. These modeling strategy changes address known causes of under-reporting of Turner Syndrome in the previous iterations of the GBD and resulted in higher estimates of Turner Syndrome than were reported previously.

The DisMod-MR model of Turner Syndrome had an excess mortality rate capped at 0.1 (slightly higher than the highest available literature estimate of excess mortality rate?). The model did not have a slope prior set on excess mortality rate as the risk of mortality associated with Turner Syndrome is not specific to the neonatal ages. This model also allows an increased maximum smoothness on excess mortality rate and random effects on prevalence limited to +/- 0.5 in order to limit random geographic variation in the estimated birth prevalence of Turner Syndrome.

### Covariates used in the DisMod-MR model of Turner Syndrome

| Covariate name                      | Type                    | Measure               | Beta value               | Exponentiated value   |
|-------------------------------------|-------------------------|-----------------------|--------------------------|-----------------------|
| Healthcare access and quality index | Country covariate       | Excess mortality rate | -0.122 (-0.250 - 0.000)  | 0.885 (0.779 - 1.000) |
| LDI (I\$ per capita)                | Country covariate       | Excess mortality rate | -0.149 (-0.298 - 0.000)  | 0.861 (0.742 - 1.000) |
| Live Births 35+ (proportion)        | Country covariate       | Prevalence            | -0.245 (-0.297 - -0.119) | 0.782 (0.743 - 0.887) |
| All MarketScan, year 2010           | Study-level x-covariate | Prevalence            | -0.958 (-1.061 - -0.856) | 0.384 (0.346 - 0.425) |

|                           |                         |            |                          |                       |
|---------------------------|-------------------------|------------|--------------------------|-----------------------|
| All MarketScan, year 2012 | Study-level x-covariate | Prevalence | -0.969 (-1.070 - -0.865) | 0.380 (0.343 - 0.421) |
|---------------------------|-------------------------|------------|--------------------------|-----------------------|

## Klinefelter Syndrome

### Case definitions and associated health states

Klinefelter syndrome, also known as 47 XXY, is a condition in which a male is born with an extra X chromosome in all or some of his cells. We also include other genotypes with supranumary X chromosomes, e.g. XXXY, XXXXY, etc. The primary feature of Klinefelter syndrome is sterility, but it can cause a variety of other conditions, including weaker muscles, increased height, poor coordination abilities, smaller genitals, breast growth, and reduced sexual drive as a result of lower testosterone levels. The GBD 2016 case definition of Klinefelter syndrome includes ICD-10 codes Q98.0, Q98.5, and Q99.8. The sequelae associated with Klinefelter syndrome are borderline intellectual disability, mild intellectual disability, primary infertility, the combination of borderline intellectual disability and infertility, and the combination of mild intellectual disability and infertility. In addition, a subset of individuals with Klinefelter syndrome are asymptomatic. The distribution of these sequelae was determined by a review of existing literature on the long-term health consequences of Turner Syndrome.

### Modeling strategy and model settings

As discussed above for Turner Syndrome, one limitation to the use of birth registry data for the estimation of Klinefelter Syndrome is that many individuals with Klinefelter Syndrome are not diagnosed prenatally or at birth. To correct this systematic under-reporting in the birth registry data, we applied a correction factor to all birth registry input data using available literature on the age pattern of Klinefelter Syndrome diagnosis (source: NID 283326). We also adjusted the both-sex live birth denominators provided in registry data using location, age, and year-specific proportions of all live births that were male. Furthermore, all prevalence data with values of zero were excluded as outliers, as these low values indicate severe under-reporting in the input data. These modeling strategy changes address known causes of under-reporting in the previous iterations of the GBD and resulted in higher estimates of Klinefelter Syndrome than were reported previously.

The DisMod-MR model of Klinefelter Syndrome had an excess mortality rate maximum limit of 0.075, allowing the model to fit estimates of excess mortality up to slightly higher than the highest reported literature values. The model did not have a slope prior set on excess mortality and allowed an increased smoothness on excess mortality rate. As with several of the other models of chromosomal conditions, random effects on prevalence were limited to  $\pm 0.5$  in order to limit random geographic variation in the estimates of birth prevalence.

### Covariates used in the DisMod-MR model of Klinefelter Syndrome

| Covariate name       | Type              | Measure               | Beta value              | Exponentiated value   |
|----------------------|-------------------|-----------------------|-------------------------|-----------------------|
| LDI (I\$ per capita) | Country covariate | Excess mortality rate | -0.150 (-0.300 - 0.000) | 0.860 (0.741 - 1.000) |

|                                         |                         |            |                          |                       |
|-----------------------------------------|-------------------------|------------|--------------------------|-----------------------|
| Legality of Abortion                    | Country covariate       | Prevalence | -0.000 (-0.000 - -0.000) | 1.000 (1.000 - 1.000) |
| Live Births 35+ (proportion)            | Country covariate       | Prevalence | 0.266 (0.164 - 0.299)    | 1.304 (1.178 - 1.349) |
| All MarketScan, year 2010               | Study-level x-covariate | Prevalence | -2.879 (-3.044 - -2.752) | 0.056 (0.048 - 0.064) |
| All MarketScan, year 2012               | Study-level x-covariate | Prevalence | -2.848 (-3.010 - -2.727) | 0.058 (0.049 - 0.065) |
| Hospital data for ages over 1 year only | Study-level x-covariate | Prevalence | -1.722 (-1.801 - -1.642) | 0.179 (0.165 - 0.194) |

## Other chromosomal abnormalities, genetic syndromes, and microdeletions

### Case definitions and associated health states

Unbalanced chromosomal rearrangements are genetic anomalies that typically occur due to meiotic nondisjunction, when homologous chromosomes do not separate normally in nuclear division during gamete formation. The GBD case definition of other chromosomal rearrangements includes 47,XXX (Triple X syndrome), other meiotic nondisjunction events, other female sex chromosome abnormalities, and other unspecified chromosomal abnormalities. The GBD 2016 case definition corresponds to the ICD-10 codes Q92.0, Q97.0, Q97.8, and Q99.9. Excluded from this definition are the chromosomal abnormalities of Down syndrome, Turner syndrome, Klinefelter syndrome, Edward syndrome and Patau syndrome, which are each modeled separately. The sequelae associated with other chromosomal rearrangements include intellectual disability, intellectual disability with dementia, intellectual disability with congenital heart disease and dementia, and intellectual disability with congenital heart disease. Additionally, a proportion of the individuals with unbalanced chromosomal rearrangements are asymptomatic. In the absence of available literature on the long-term health outcomes among individuals with other chromosomal conditions, the severity distributions associated with Down Syndrome were used for the sequela associated with other chromosomal anomalies.

Edwards Syndrome, also known as Trisomy 18, is the condition in which infants are born with a third copy of chromosome 18. Patau syndrome, also known as Trisomy 13, is the condition in which infants are born with a third copy of chromosome 13. The GBD estimates the combined prevalence of these two conditions in a single model as they present similarly and are associated with similar rates of excess mortality. Infants with Edwards syndrome typically have low birthweights and a range of associated conditions including a small head and jaw, limb abnormalities, and severe intellectual disability. Infants with Patau syndrome have a range of associated defects including musculoskeletal anomalies, developmental abnormalities of the nervous system such as microcephaly, congenital heart defects and severe intellectual disability. The ICD-10 code for Edwards syndrome is Q91.3 and the ICD-10 code for Patau syndrome is Q91.7. In the GBD 2016, all cases of Edwards and Patau syndrome are assigned the sequela of severe motor and cognitive impairment, and a proportion of these cases are also associated with congenital heart disease. The proportion of cases with associated congenital heart disease was 0.775, derived by pooling estimates from available literature on the health states associated with the two trisomies (references: NID 292226 and NID 292228).

### Modeling strategy and model settings

The DisMod-MR model of other chromosomal abnormalities, genetic syndromes, and microdeletions was used to estimate the prevalence and mortality among infants with chromosomal conditions that are not explicitly included in any other congenital models. This model used cause-specific mortality estimates from the corresponding model of other chromosomal anomalies in the GBD 2016 Cause of Death analysis; these cause-specific mortality estimates were then converted to excess mortality where overlapping prevalence data were available. Random effects on prevalence were limited to  $\pm 0.5$  as limited variation in the birth prevalence of chromosomal anomalies is expected across geographies. The maximum allowed smoothness on excess mortality rate was set to  $\xi_i=2.0$  in order to fit high mortality rates in the early age groups.

In the DisMod-MR model of Edwards Syndrome and Patau Syndrome, random effects on prevalence were limited to  $\pm 0.5$ , reflecting the expectation of limited geographic variation in the birth prevalence of Edwards Syndrome and Patau Syndrome. An increasing slope prior was set on excess mortality rate



for all ages, as individuals with these trisomies generally die within the first few years of life. The model allowed a maximum smoothness of  $\lambda_i = 2.0$  in order to fit high excess mortality in the early age groups.

All input data with birth prevalence values of zero were excluded as outliers, as these values represent under-reporting and low case ascertainment in the input data rather than a true lack of these chromosomal conditions in the corresponding locations.

#### Covariates used in the DisMod-MR model of other chromosomal abnormalities

| Covariate name                               | Type                    | Measure               | Beta value               | Exponentiated value   |
|----------------------------------------------|-------------------------|-----------------------|--------------------------|-----------------------|
| Healthcare access and quality index          | Country covariate       | Excess mortality rate | -0.000 (-0.000 - -0.000) | 1.000 (1.000 - 1.000) |
| Legality of Abortion                         | Country covariate       | Prevalence            | -0.006 (-0.007 - -0.005) | 0.994 (0.993 - 0.995) |
| Live Births 35+ (proportion)                 | Country covariate       | Prevalence            | 0.293 (0.279 - 0.299)    | 1.340 (1.321 - 1.349) |
| All MarketScan, year 2010                    | Study-level x-covariate | Prevalence            | -0.388 (-0.455 - -0.320) | 0.679 (0.635 - 0.726) |
| All MarketScan, year 2012                    | Study-level x-covariate | Prevalence            | -0.278 (-0.353 - -0.206) | 0.757 (0.703 - 0.814) |
| Hospital data for ages over 1 year only      | Study-level x-covariate | Prevalence            | -0.528 (-0.561 - -0.490) | 0.590 (0.571 - 0.613) |
| Hospital data for the under-1 year age group | Study-level x-covariate | Prevalence            | -0.002 (-0.006 - -0.000) | 0.998 (0.994 - 1.000) |
| Healthcare access and quality index          | Country covariate       | Excess mortality rate | -0.000 (-0.000 - -0.000) | 1.000 (1.000 - 1.000) |
| Legality of Abortion                         | Country covariate       | Prevalence            | -0.006 (-0.007 - -0.005) | 0.994 (0.993 - 0.995) |
| Live Births 35+ (proportion)                 | Country covariate       | Prevalence            | 0.293 (0.279 - 0.299)    | 1.340 (1.321 - 1.349) |

#### Covariates used in the DisMod model of Edwards Syndrome and Patau Syndrome

| Covariate name                      | Type                    | Measure               | Beta value               | Exponentiated value   |
|-------------------------------------|-------------------------|-----------------------|--------------------------|-----------------------|
| Healthcare access and quality index | Country covariate       | Excess mortality rate | -0.124 (-0.250 - -0.004) | 0.883 (0.779 - 0.996) |
| LDI (I\$ per capita)                | Country covariate       | Excess mortality rate | -0.025 (-0.050 - 0.000)  | 0.975 (0.951 - 1.000) |
| Legality of Abortion                | Country covariate       | Prevalence            | -0.002 (-0.004 - 0.000)  | 0.998 (0.996 - 1.000) |
| Live Births 35+ (proportion)        | Country covariate       | Prevalence            | 0.213 (0.034 - 0.298)    | 1.238 (1.034 - 1.348) |
| All MarketScan, year 2010           | Study-level x-covariate | Prevalence            | -2.087 (-2.288 - 1.871)  | 0.124 (0.101 - 0.154) |

|                               |                         |            |                          |                       |
|-------------------------------|-------------------------|------------|--------------------------|-----------------------|
| All MarketScan, year 2012     | Study-level x-covariate | Prevalence | -2.022 (-2.233 - -1.815) | 0.132 (0.107 - 0.163) |
| Hospital data                 | Study-level x-covariate | Prevalence | -0.003 (-0.010 - -0.001) | 0.997 (0.990 - 0.999) |
| Stillbirths included as cases | Study-level x-covariate | Prevalence | 0.012 (0.000 - 0.046)    | 1.012 (1.000 - 1.047) |

## Musculoskeletal congenital anomalies

### Case definitions and associated health states

The GBD 2016 definition of musculoskeletal congenital anomalies includes any anomalies of the muscles or skeletal system present at birth that are not caused by a defined chromosomal syndrome. Within the range of congenital musculoskeletal anomalies, we explicitly model three sub-categories: polydactyly and syndactyly, limb reduction defects, and all other congenital musculoskeletal anomalies.

Polydactyly is the condition of being born with at least one extra digit on either the hand or the foot, while syndactyly is absence of at least one digit. Our case definition of polydactyly corresponds to ICD-10 code Q69, and syndactyly corresponds to Q70. The sequela associated with all cases of polydactyly and syndactyly is level 1 disfigurement. Limb reduction defects are the condition where a part or all of the arm or limb of a fetus fails to form during development, so that the limb is either reduced from its normal size or missing entirely. The GBD case definition of limb reduction defects corresponds with ICD-10 codes Q71 (all three-digit codes under Q71), Q72 (all three-digit codes), Q73.0, Q73.1 and Q73.8.

The other congenital musculoskeletal anomalies included within the total estimate of congenital musculoskeletal anomalies includes clubfoot, skeletal dysplasias, congenital deformities of the spine, congenital dysplasia of the hip, and other congenital musculoskeletal anomalies. This “other” category corresponds to ICD-10 codes Q65, Q65.0, Q65.00, Q65.01, Q65.02, Q65.1; Q65.2; Q65.8; Q65.81; Q65.82; Q65.89; Q65.9; Q66; Q66.0; Q66.1; Q68; Q68.1; Q68.2; Q68.6; Q68.8; Q74; Q74.1; Q74.2; Q74.3; Q74.9; Q75; Q75.0; Q75.5; Q75.9; Q79.8; Q79.9, Q76; Q76.1; Q76.2; Q76.3; Q76.4; Q76.41; Q76.411; Q76.412; Q76.413; Q76.414; Q76.415; Q76.419; Q76.42; Q76.425; Q76.426; Q76.427; Q76.428; Q76.429; Q76.49; Q76.8; Q76.9, Q77; Q77.0; Q77.1; Q77.2; Q77.3; Q77.4; Q77.5; Q77.6; Q77.7; Q77.8; Q77.9; Q78; Q78.0; Q78.1; Q78.2; Q78.3; Q78.4; Q78.5; Q78.6; Q78.8, and Q78.9.

All cases of polydactyly and syndactyly are assigned the health state of level 1 disfigurement. Remission is allowed in the model of polydactyly and syndactyly, as individuals born with these conditions may have them surgically corrected and are then no longer considered within our case definition. However, remission is not included in the models of limb reduction defects or other congenital musculoskeletal defects, as these conditions typically cannot be fully surgically corrected. All cases of limb reduction defects are associated with level 2 disfigurement. A proportion of limb reduction defect cases are associated with no motor impairment, mild motor impairment with and without pain, and moderate motor impairment with and without pain. The distribution of health states associated with congenital limb reduction was derived from an analysis of available literature on the long-term outcomes among individuals with congenital limb reductions (references: NIDs 292277 and 292279).

In the absence comprehensive literature on the long-term outcomes associated with the category of other congenital musculoskeletal anomalies, prevalence estimates of other congenital musculoskeletal anomalies were assigned health states using the proportions derived for limb reduction defects.

### Modeling strategy and model settings

As with other categories of congenital anomalies, a model of total musculoskeletal anomalies was used as an envelope model and the sub-categories of congenital musculoskeletal anomalies were squeezed proportionally to these total estimates. The prevalence of other congenital musculoskeletal anomalies was derived from MarketScan claims data as the age- and sex-specific proportion of total musculoskeletal congenital anomaly cases that are not included in the polydactyly and syndactyly or limb reduction defects categories.

The DisMod model of total musculoskeletal anomalies used cause-specific mortality estimates from the corresponding model in the GBD Causes of Death analysis, and converted these data to excess mortality estimates where corresponding prevalence data were available. Random effects on prevalence were limited to  $\pm 0.5$  in order to limit geographic variation in the birth prevalence of congenital musculoskeletal anomalies. Smoothness on excess mortality rate was increased to  $\text{Xi} = 2.0$  to allow the model to fit a steep decrease in excess mortality rate after the earliest age groups. The model also included a decreasing slope prior on excess mortality rate for all ages, as the risk of mortality from congenital musculoskeletal anomalies is greatest shortly after birth and decreases over age.

In the DisMod model of limb reduction defects, random effects on prevalence were limited to  $\pm 0.3$  in order to limit geographic variation in the estimated birth prevalence. The excess mortality rate was set to a maximum of 0.5 before 70 years of age in to reflect the relatively low mortality risk of congenital limb anomalies, and a decreasing slope prior on excess mortality rate was set for all ages as the risk of mortality is highest in the earliest age groups.

The DisMod model of polydactyly and syndactyly limited random effects on prevalence to  $\pm 0.5$ , as we expected limited geographic variation in the birth prevalence estimates. Excess mortality was set to 0 for all ages. The remission rate was bounded from 0 to 0.02 for the first three months of life, as surgical correction of polydactyly or syndactyly rarely occurs in the first few months of life. Remission was bounded between 0 and 0.5 for ages 2 to 5 years, the ages during which surgical correction is most likely to occur, then set to a maximum of 0.02 after 5 years of age. The smoothness on remission was set to  $\text{Xi} = 1.5$  in order to facilitate steep changes in remission rates during the first few years of life.

#### Covariates used in the DisMod-MR model of total musculoskeletal anomalies

| Covariate name                      | Type                    | Measure                       | Beta value               | Exponentiated value   |
|-------------------------------------|-------------------------|-------------------------------|--------------------------|-----------------------|
| Healthcare access and quality index | Country covariate       | With-condition mortality rate | -0.250 (-0.500 - -0.003) | 0.779 (0.607 - 0.997) |
| LDI (I\$ per capita)                | Country covariate       | Excess mortality rate         | -0.325 (-0.500 - -0.243) | 0.722 (0.607 - 0.784) |
| Legality of Abortion                | Country covariate       | Prevalence                    | -0.000 (-0.001 - -0.000) | 1.000 (0.999 - 1.000) |
| All MarketScan, year 2010           | Study-level x-covariate | Prevalence                    | -0.003 (-0.009 - -0.001) | 0.997 (0.991 - 0.999) |
| All MarketScan, year 2012           | Study-level x-covariate | Prevalence                    | -0.004 (-0.010 - -0.000) | 0.996 (0.990 - 1.000) |

|                                              |                         |            |                          |                       |
|----------------------------------------------|-------------------------|------------|--------------------------|-----------------------|
| Chromosomal diagnoses excluded               | Study-level x-covariate | Prevalence | -0.007 (-0.025 - -0.000) | 0.993 (0.975 - 1.000) |
| Hospital data for ages over 1 year only      | Study-level x-covariate | Prevalence | 0.456 (0.399 - 0.500)    | 1.577 (1.490 - 1.648) |
| Hospital data for the under-1 year age group | Study-level x-covariate | Prevalence | 0.496 (0.487 - 0.499)    | 1.642 (1.627 - 1.648) |
| Stillbirths included as cases                | Study-level x-covariate | Prevalence | 0.001 (0.000 - 0.004)    | 1.001 (1.000 - 1.004) |

#### Covariates used in the DisMod-MR model of polydactyly and syndactyly

| Covariate name                              | Type                    | Measure    | Beta value               | Exponentiated value   |
|---------------------------------------------|-------------------------|------------|--------------------------|-----------------------|
| LDI (I\$ per capita)                        | Country covariate       | Remission  | 0.999 (0.500 - 1.500)    | 2.717 (1.649 - 4.482) |
| All MarketScan, year 2010                   | Study-level x-covariate | Prevalence | -0.774 (-0.899 - -0.646) | 0.461 (0.407 - 0.524) |
| All MarketScan, year 2012                   | Study-level x-covariate | Prevalence | -0.713 (-0.842 - -0.590) | 0.490 (0.431 - 0.555) |
| Chromosomal diagnoses excluded              | Study-level x-covariate | Prevalence | -0.019 (-0.049 - -0.001) | 0.981 (0.952 - 0.999) |
| Hospital data for ages over 1 year only     | Study-level x-covariate | Prevalence | 0.996 (0.985 - 1.000)    | 2.709 (2.677 - 2.718) |
| Stillbirths included as cases               | Study-level x-covariate | Prevalence | 0.003 (0.000 - 0.008)    | 1.003 (1.000 - 1.008) |
| Terminations of pregnancy included as cases | Study-level x-covariate | Prevalence | 0.010 (0.000 - 0.034)    | 1.010 (1.000 - 1.035) |
| Under Reported                              | Study-level x-covariate | Prevalence | -0.995 (-1.000 - -0.978) | 0.370 (0.368 - 0.376) |
| LDI (I\$ per capita)                        | Country covariate       | Remission  | 0.999 (0.500 - 1.500)    | 2.717 (1.649 - 4.482) |

#### Covariates used in the DisMod-MR model of limb reduction defects

| Covariate name                 | Type                    | Measure               | Beta value               | Exponentiated value   |
|--------------------------------|-------------------------|-----------------------|--------------------------|-----------------------|
| LDI (I\$ per capita)           | Country covariate       | Excess mortality rate | -0.050 (-0.100 - 0.000)  | 0.952 (0.905 - 1.000) |
| Legality of Abortion           | Country covariate       | Prevalence            | -0.002 (-0.004 - -0.000) | 0.998 (0.996 - 1.000) |
| All MarketScan, year 2010      | Study-level x-covariate | Prevalence            | -0.017 (-0.062 - -0.000) | 0.983 (0.940 - 1.000) |
| All MarketScan, year 2012      | Study-level x-covariate | Prevalence            | -0.086 (-0.282 - -0.001) | 0.917 (0.755 - 0.999) |
| Chromosomal diagnoses excluded | Study-level x-covariate | Prevalence            | -0.075 (-0.114 - -0.038) | 0.928 (0.893 - 0.963) |

|                                              |                         |            |                          |                       |
|----------------------------------------------|-------------------------|------------|--------------------------|-----------------------|
| Hospital data for ages over 1 year only      | Study-level x-covariate | Prevalence | 0.536 (0.431 - 0.641)    | 1.709 (1.539 - 1.898) |
| Hospital data for the under-1 year age group | Study-level x-covariate | Prevalence | 0.543 (0.385 - 0.703)    | 1.721 (1.469 - 2.020) |
| Stillbirths included as cases                | Study-level x-covariate | Prevalence | 0.126 (0.072 - 0.171)    | 1.134 (1.075 - 1.186) |
| Terminations of pregnancy included as cases  | Study-level x-covariate | Prevalence | 0.015 (0.000 - 0.051)    | 1.015 (1.000 - 1.053) |
| Under Reported                               | Study-level x-covariate | Prevalence | -0.073 (-0.125 - -0.027) | 0.930 (0.883 - 0.973) |

## **Urogenital congenital anomalies**

### **Case definitions and associated health states**

The GBD 2016 case definition of urogenital congenital anomalies include anomalies of the genitals and the urinary system that are present at birth. While some types of urogenital congenital anomalies encompass both the urinary and genital systems, we have assigned each congenital condition as a malformation of either the urinary or the genital system and model anomalies of the urinary and genital systems separately. Urinary anomalies include congenital malformation of the collecting system, ureter, bladder, and kidney, as well as bladder exstrophy and epispadias. The ICD-10 codes included in the category of urinary anomalies are Q64.0, Q64.1, Q60-Q61 and Q62-Q63. Genital anomalies include hypospadias, ambiguous or indeterminate sex, other congenital abnormalities of the male genitalia, and a variety of female genital malformations. ICD-10 codes Q50-Q52, Q54, Q56, and Q55 (excluding Q55.20-Q55.21) are included in the case definition of congenital genital anomalies. Undescended testicles are excluded from the case definition of genital anomalies, as this is not considered a severe condition. Remission is not permitted in the models of either urinary or genital anomalies, as individuals who receive surgical corrections of these conditions after birth typically continue to experience health consequences as a result of these congenital conditions.

The total prevalence of congenital urinary anomalies was split into proportions with and without each of the following health states: urinary incontinence, impotence, recurrent urinary tract infections and other recurring abdominal issues, and atypical genitalia (corresponding to disfigurement, level 1 in the GBD Disability Weights Study). Cases of congenital genital anomalies was split into proportions with and without primary infertility, impotence, recurrent urinary tract infections and other recurring abdominal issues, and atypical genitalia. Estimates were produced for the prevalence of every possible combination of those long-term sequelae, assuming independence between the outcomes.

The distribution of these long-term outcomes was derived from a review of available literature on the long-term outcomes experienced cohorts of individuals born with a range of congenital urogenital anomalies (references: NIDs 292284, 292293, 292295, 292297, 292299, 292316, and 292318).

### **Modeling strategy and model settings**

Congenital urogenital anomalies were modeled as two distinct categories, with distinct model specifications: urinary congenital anomalies and genital congenital anomalies. In the DisMod model of congenital urinary anomalies, random effects on prevalence were limited to  $\pm 0.5$  and random effects on with-condition mortality were limited to  $\pm 1.0$ . The maximum excess mortality rate was set to 5.0 for the first year of life and 2.0 for ages 1 year to 70 years. The excess mortality rate set to 0 for ages 70+ years, consistent with the GBD 2016 Cause of Death models which exclude congenital urogenital anomalies as a cause of death after 70 years of age. The smoothness on excess mortality rate was set to  $\lambda_i = 0.6$  in order to fit changes in the excess mortality rate during the neonatal period.

In the DisMod model of congenital genital anomalies, random effects on prevalence were limited to  $\pm 0.5$  in order to limit random geographic variation in the estimates of birth prevalence, and random effects on with-condition mortality were limited to  $\pm 1.0$ . The maximum excess mortality rate was set to 0.5 for all ages < 70 years, according to maximum observed excess mortality rates in available literature data on congenital genital anomalies. The excess mortality rate set to 0 for ages 70+ years, consistent with the GBD 2016 Cause of Death models which exclude congenital urogenital anomalies as a cause of death after 70 years of age.

Covariates used in the DisMod-MR model of urinary congenital anomalies

| Covariate name                               | Type                    | Measure               | Beta value               | Exponentiated value   |
|----------------------------------------------|-------------------------|-----------------------|--------------------------|-----------------------|
| LDI (I\$ per capita)                         | Country covariate       | Excess mortality rate | -0.498 (-0.750 - -0.256) | 0.608 (0.472 - 0.774) |
| All MarketScan, year 2010                    | Study-level x-covariate | Prevalence            | -0.018 (-0.065 - -0.000) | 0.983 (0.937 - 1.000) |
| All MarketScan, year 2012                    | Study-level x-covariate | Prevalence            | -0.013 (-0.054 - -0.001) | 0.987 (0.947 - 0.999) |
| Chromosomal diagnoses excluded               | Study-level x-covariate | Prevalence            | -0.206 (-0.297 - -0.132) | 0.814 (0.743 - 0.876) |
| Hospital data for ages over 1 year only      | Study-level x-covariate | Prevalence            | -0.001 (-0.002 - -0.000) | 0.999 (0.998 - 1.000) |
| Hospital data for the under-1 year age group | Study-level x-covariate | Prevalence            | -0.013 (-0.143 - -0.000) | 0.987 (0.867 - 1.000) |
| Stillbirths included as cases                | Study-level x-covariate | Prevalence            | 0.002 (0.000 - 0.005)    | 1.002 (1.000 - 1.005) |
| Terminations of pregnancy included as cases  | Study-level x-covariate | Prevalence            | 0.230 (0.142 - 0.294)    | 1.258 (1.152 - 1.342) |

Covariates used in the DisMod-MR model of congenital genital anomalies

| Covariate name                                        | Type                    | Measure    | Beta value               | Exponentiated value   |
|-------------------------------------------------------|-------------------------|------------|--------------------------|-----------------------|
| LDI (I\$ per capita)                                  | Country covariate       | Remission  | 0.556 (0.100 - 0.977)    | 1.743 (1.105 - 2.655) |
| All MarketScan, year 2010                             | Study-level x-covariate | Prevalence | -0.309 (-0.436 - -0.181) | 0.734 (0.647 - 0.835) |
| All MarketScan, year 2012                             | Study-level x-covariate | Prevalence | -0.333 (-0.445 - -0.207) | 0.717 (0.641 - 0.813) |
| Chromosomal diagnoses excluded                        | Study-level x-covariate | Prevalence | -0.030 (-0.076 - -0.001) | 0.971 (0.927 - 0.999) |
| EUROCAT to NBDPN registry case composition adjustment | Study-level x-covariate | Prevalence | -0.383 (-0.494 - -0.273) | 0.682 (0.610 - 0.761) |
| Hospital data for ages over 1 year only               | Study-level x-covariate | Prevalence | 0.256 (0.122 - 0.374)    | 1.291 (1.129 - 1.453) |
| Hospital data for the under-1 year age group          | Study-level x-covariate | Prevalence | -0.485 (-0.500 - -0.444) | 0.616 (0.607 - 0.641) |
| ICDBSR to NBDPN registry case composition adjustment  | Study-level x-covariate | Prevalence | -0.519 (-0.628 - -0.422) | 0.595 (0.534 - 0.656) |

## Congenital anomalies of the digestive system

### Case definitions

Congenital anomalies of the digestive system include any anomalies of the gastrointestinal tract present at birth as the result of abnormal embryonic development. As with the other congenital causes, this variety of digestive system abnormalities is split into four sub-cause categories. Congenital diaphragmatic hernia, a life-threatening malformation of the diaphragm that allows the abdominal organs to push into the chest cavity and obstructs proper formation of the lungs, is modeled separately from all other congenital malformations of the digestive system. Congenital diaphragmatic hernia corresponds to ICD-10 code Q79.0.

All congenital malformations of the abdominal wall are modeled together as a distinct sub-category. The primary diagnoses in this category are gastroschisis, omphalocele, and prune belly syndrome, corresponding to ICD-10 codes Q79.3, Q79.2, and Q79.4, respectively. All variations of atresia and/or stenosis of the digestive tract are modeled together as the third distinct sub-category of digestive congenital anomalies. This includes biliary atresia, esophageal atresia and/or stenosis with and without tracheoesophageal fistula, and atresia and stenosis of the small intestine, large intestine, rectum and anus. The ICD-10 codes included in the atresia and stenosis sub-cause category are Q42.0; Q42.1; Q42.2; Q42.3; Q42.4; Q42.8; Q42.9, Q42.8; Q42.9, Q42.0; Q42.1; Q42.2; Q42.3; Q42.4; Q41 (Q41.0; Q41.1; Q41.2; Q41.8; Q41.9; ), Q44.2, Q39.0; Q39.1 and Q39.2. The final category of digestive congenital anomalies estimated in the GBD is other congenital malformations and diseases of the digestive system. This includes ICD-10 codes Q38 (Q38.0; Q38.3; Q38.4; Q38.6; Q38.7; Q38.8); Q39(Q39.3; Q39.4; Q39.5; Q39.6; Q39.8; Q39.9); Q40(Q40.0; Q40.1; Q40.2; Q40.3; Q40.8; Q40.9); Q43(Q43.1; Q43.2; Q43.3; Q43.4; Q43.5; Q43.6; Q43.7; Q43.8; Q43.9); Q44(Q44.0; Q44.1; Q44.3; Q44.4; Q44.5; Q44.6; Q44.7); Q45(Q45.0; Q45.1; Q45.2; Q45.3; Q45.8; Q45.9); Q79.1, and Q79.5(Q79.51; Q79.59). Inguinal hernias present at birth are excluded from the case definition of gastrointestinal congenital anomalies and are modeled separately as part of the estimation of inguinal hernias.

Most congenital anomalies of the gastrointestinal tract require surgical correction early in life in order to ensure infant survival. Following surgical intervention, individuals born with these congenital anomalies may experience a range of long-term outcomes as a result of their congenital conditions. Thus, we do not permit remission in the models of any congenital digestive anomalies and the health states associated with the various types of digestive anomalies reflect the long-term outcomes experienced by individuals with surgically corrected congenital malformations.

### Health states associated with congenital anomalies of the digestive system

The health outcomes associated with congenital diaphragmatic hernia include every combination of disfigurement, chronic abdominal pain, mild chronic respiratory problems and breathlessness, mild intellectual disability, and a proportion of patients who are asymptomatic. The distribution of these long-term health outcomes was derived from a pooled analysis of available literature on the long-term outcomes in surviving patients born with congenital diaphragmatic hernias (references: NIDs 281144, 292221 and 292224).

The health outcomes associated with congenital malformations of the abdominal wall include every combination of constipation, chronic abdominal pain, and disfigurement and concern about scars. The distribution of these outcomes was calculated from a pooled analysis of literature sources on the long-term outcomes among surviving individuals born with congenital malformations of the abdominal wall (references: NIDs 292217 and 292235). Similarly, the outcomes associated with congenital atresia and/or stenosis of the abdominal tract include every combination of dysphagia, acid reflux, chronic abdominal



pain and/or nausea, and chronic respiratory problems; the distribution of these long-term outcomes was also derived from available long-term follow-up studies (references: NIDs 292215 and 292242).

The distribution of health outcomes associated with other congenital anomalies of the gastrointestinal tract was considered to be the same as the health outcomes associated with atresia and/or stenosis of the abdominal tract.

### **Modeling strategy and model settings**

In order to ensure internal consistency in the estimates of each sub-type of congenital digestive anomalies, we generated a model to estimate the total prevalence and associated mortality due to all congenital digestive anomalies, then fit the estimates of each sub-type of congenital digestive anomalies proportionally to the envelope of this total model. The prevalence of other congenital anomalies of the digestive tract was calculated as a proportion of the total digestive anomalies estimates, using age- and sex-specific proportions derived from MarketScan claims data, which has the most detailed ICD-9 and ICD-10 coding information available of any input data sources. This modeling strategy allowed us to utilize the GBD 2016 Cause of Death estimates as input to the total congenital digestive anomalies estimates and also allowed us to incorporate literature data that reported only the total prevalence of all digestive anomalies.

The DisMod model of total congenital digestive anomalies used cause-specific mortality estimates from the corresponding GBD 2016 Cause of Death model of congenital digestive anomalies, and these data were converted to excess mortality estimates where corresponding cause-specific mortality estimates were available. The model had random effects on prevalence limited to  $\pm 0.5$  and a decreasing slope prior on excess mortality rate was set for all ages. The smoothness on excess mortality rate was increased to  $\text{Xi} = 1.0$  in order to fit steep changes in excess mortality rate during the neonatal age period.

In the DisMod model of congenital diaphragmatic hernia, random effects on prevalence were set to  $\pm 0.5$  and random effects on with-condition mortality were set to  $\pm 1.0$ . The minimum excess mortality for the early neonatal age period was set to 2.0. A decreasing slope prior on excess mortality rate was set for all ages, as the risk of mortality due to congenital diaphragmatic hernia is highest shortly after birth and diminishes over the life course following surgical correction of the condition. Smoothness on excess mortality rate was increased to  $\text{Xi} = 1.0$  in order to fit steep changes in excess mortality rate during the first weeks of life.

The DisMod model of congenital malformations of the abdominal wall had random effects on prevalence limited to  $\pm 0.5$  and random effects on with-condition mortality were limited to  $\pm 1.0$ . The minimum excess mortality rate was set to 3.0 in the early neonatal period according to the range of excess mortality estimates observed in literature data. A decreasing slope prior on excess mortality rate was set for all ages, and the smoothness on excess mortality rate was set to  $\text{Xi} = 0.8$ , allowing the model to fit a steep decrease in the excess mortality rate after the neonatal age period.

In the DisMod model of congenital diaphragmatic hernia, random effects on prevalence were set to  $\pm 0.5$  and random effects on with-condition mortality were set to  $\pm 1.0$ . A decreasing slope prior on excess mortality rate was set for all ages, as the risk of mortality due to these congenital digestive anomalies is highest shortly after birth. The smoothness on excess mortality rate was increased to  $\text{Xi} = 1.0$  in order to fit steep changes in excess mortality rate during the first weeks of life.

Covariates used in the DisMod-MR model of total congenital digestive anomalies

| Covariate name                               | Type                    | Measure                       | Beta value               | Exponentiated value   |
|----------------------------------------------|-------------------------|-------------------------------|--------------------------|-----------------------|
| LDI (I\$ per capita)                         | Country covariate       | Excess mortality rate         | -0.158 (-0.195 - -0.124) | 0.854 (0.823 - 0.883) |
| Chromosomal diagnoses excluded               | Study-level x-covariate | Prevalence                    | -0.047 (-0.086 - -0.007) | 0.954 (0.917 - 0.993) |
| Hospital data for ages over 1 year only      | Study-level x-covariate | Prevalence                    | -0.237 (-0.276 - -0.193) | 0.789 (0.759 - 0.824) |
| Hospital data for the under-1 year age group | Study-level x-covariate | Prevalence                    | 0.381 (0.318 - 0.440)    | 1.464 (1.375 - 1.552) |
| Registry data                                | Study-level x-covariate | Prevalence                    | -0.199 (-0.240 - -0.162) | 0.819 (0.787 - 0.850) |
| Stillbirths included as cases                | Study-level x-covariate | Prevalence                    | 0.003 (0.000 - 0.015)    | 1.003 (1.000 - 1.015) |
| Terminations of pregnancy included as cases  | Study-level x-covariate | Prevalence                    | 0.048 (0.006 - 0.114)    | 1.049 (1.006 - 1.121) |
| Under Reported                               | Study-level x-covariate | Prevalence                    | -0.910 (-0.968 - -0.852) | 0.403 (0.380 - 0.427) |
| Under Reported                               | Study-level z-covariate | With-condition mortality rate | 1.657 (1.207 - 1.975)    | 5.246 (3.343 - 7.207) |

Covariates used in the DisMod-MR model of congenital diaphragmatic hernia

| Covariate name                      | Type                    | Measure                       | Beta value               | Exponentiated value   |
|-------------------------------------|-------------------------|-------------------------------|--------------------------|-----------------------|
| Healthcare access and quality index | Country covariate       | With-condition mortality rate | -0.252 (-0.498 - 0.000)  | 0.777 (0.608 - 1.000) |
| LDI (I\$ per capita)                | Country covariate       | Excess mortality rate         | -0.627 (-1.000 - -0.250) | 0.534 (0.368 - 0.779) |
| All MarketScan, year 2010           | Study-level x-covariate | Prevalence                    | -1.571 (-1.692 - -1.445) | 0.208 (0.184 - 0.236) |
| All MarketScan, year 2012           | Study-level x-covariate | Prevalence                    | -1.566 (-1.688 - -1.447) | 0.209 (0.185 - 0.235) |
| Chromosomal diagnoses excluded      | Study-level x-covariate | Prevalence                    | -0.115 (-0.183 - -0.043) | 0.892 (0.833 - 0.958) |
| Hospital data                       | Study-level x-covariate | Prevalence                    | -0.003 (-0.007 - -0.000) | 0.997 (0.993 - 1.000) |
| Stillbirths included as cases       | Study-level x-covariate | Prevalence                    | 0.008 (0.000 - 0.024)    | 1.008 (1.000 - 1.025) |

Covariates used in the DisMod-MR model of congenital malformations of the abdominal wall

| Covariate name                               | Type                    | Measure                       | Beta value               | Exponentiated value   |
|----------------------------------------------|-------------------------|-------------------------------|--------------------------|-----------------------|
| Healthcare access and quality index          | Country covariate       | With-condition mortality rate | -0.025 (-0.049 - -0.006) | 0.975 (0.952 - 0.994) |
| LDI (I\$ per capita)                         | Country covariate       | Excess mortality rate         | -0.425 (-0.750 - -0.102) | 0.654 (0.472 - 0.903) |
| Chromosomal diagnoses excluded               | Study-level x-covariate | Prevalence                    | -0.019 (-0.057 - -0.000) | 0.981 (0.945 - 1.000) |
| Hospital data for ages over 1 year only      | Study-level x-covariate | Prevalence                    | -0.007 (-0.021 - -0.000) | 0.993 (0.979 - 1.000) |
| Hospital data for the under-1 year age group | Study-level x-covariate | Prevalence                    | -0.002 (-0.008 - -0.000) | 0.998 (0.992 - 1.000) |
| Stillbirths included as cases                | Study-level x-covariate | Prevalence                    | 0.027 (0.001 - 0.077)    | 1.027 (1.001 - 1.080) |
| Terminations of pregnancy included as cases  | Study-level x-covariate | Prevalence                    | 0.102 (0.033 - 0.180)    | 1.107 (1.034 - 1.198) |
| Under Reported                               | Study-level x-covariate | Prevalence                    | -0.705 (-0.785 - -0.625) | 0.494 (0.456 - 0.535) |

Covariates used in the DisMod-MR model of congenital atresia and/or stenosis of the digestive tract

| Covariate name                               | Type                    | Measure                       | Beta value               | Exponentiated value   |
|----------------------------------------------|-------------------------|-------------------------------|--------------------------|-----------------------|
| Healthcare access and quality index          | Country covariate       | Excess mortality rate         | -0.250 (-0.496 - 0.000)  | 0.779 (0.609 - 1.000) |
| LDI (I\$ per capita)                         | Country covariate       | Excess mortality rate         | -0.050 (-0.100 - -0.000) | 0.951 (0.905 - 1.000) |
| Chromosomal diagnoses excluded               | Study-level x-covariate | Prevalence                    | -0.274 (-0.300 - -0.222) | 0.760 (0.741 - 0.801) |
| Hospital data for ages over 1 year only      | Study-level x-covariate | Prevalence                    | -0.003 (-0.008 - -0.000) | 0.997 (0.992 - 1.000) |
| Hospital data for the under-1 year age group | Study-level x-covariate | Prevalence                    | -0.001 (-0.003 - -0.000) | 0.999 (0.997 - 1.000) |
| Stillbirths included as cases                | Study-level x-covariate | Prevalence                    | 0.002 (0.000 - 0.005)    | 1.002 (1.000 - 1.005) |
| Terminations of pregnancy included as cases  | Study-level x-covariate | Prevalence                    | 0.018 (0.001 - 0.064)    | 1.019 (1.001 - 1.066) |
| Under Reported                               | Study-level x-covariate | Prevalence                    | -0.992 (-1.000 - -0.968) | 0.371 (0.368 - 0.380) |
| Under Reported                               | Study-level z-covariate | With-condition mortality rate | 1.544 (1.203 - 1.968)    | 4.683 (3.330 - 7.156) |

## Other congenital anomalies

In addition of the specific types of congenital anomalies outlined in the preceding pages, there are a number of other types of defects that may be present at birth. These other congenital defects include anomalies of the ears, eyes, face and neck, respiratory malformation and diseases, skin disorders, phakomatoses and other neurological disorders that are not included in the case definition of neural tube defects. Estimates of the YLDs attributable to these other congenital anomalies are derived from a YLL:YLD ratio using YLLs from the cause of death (COD) estimates for other congenital anomalies.

# Dermatitis

## Flowcharts for Atopic Dermatitis, Contact Dermatitis, & Seborrheic Dermatitis

### Atopic Dermatitis

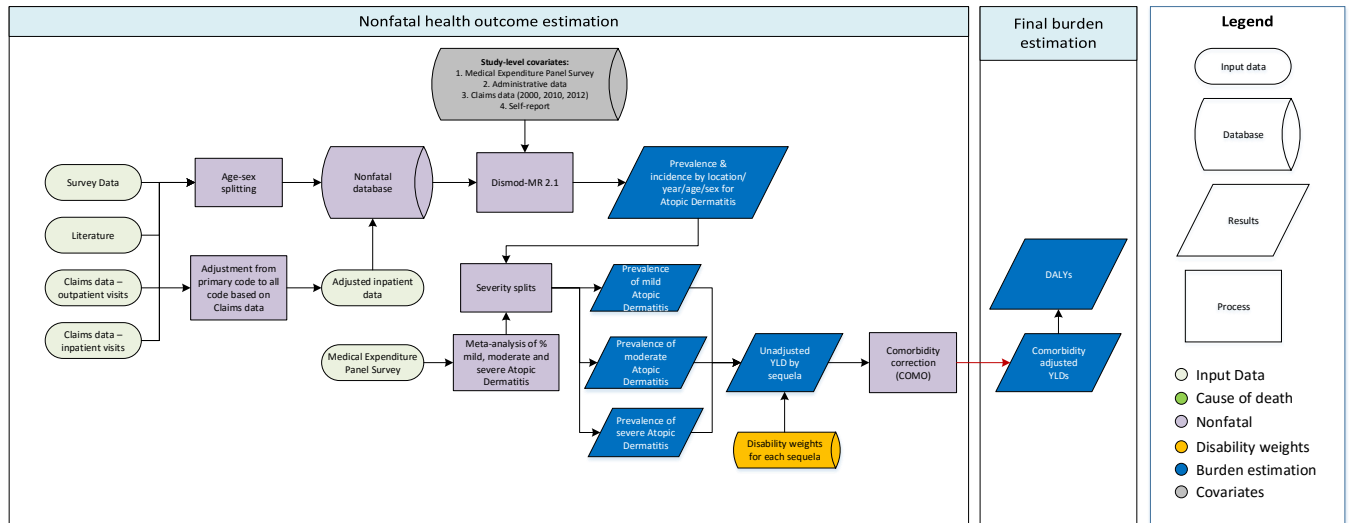

### Contact Dermatitis

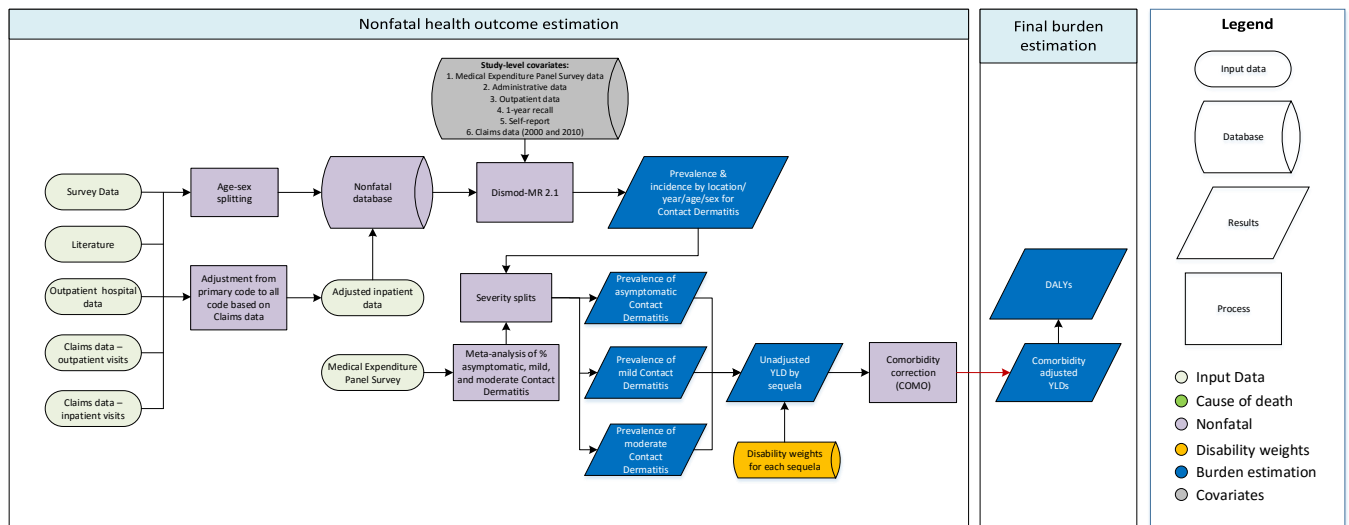

## Seborrhoeic Dermatitis

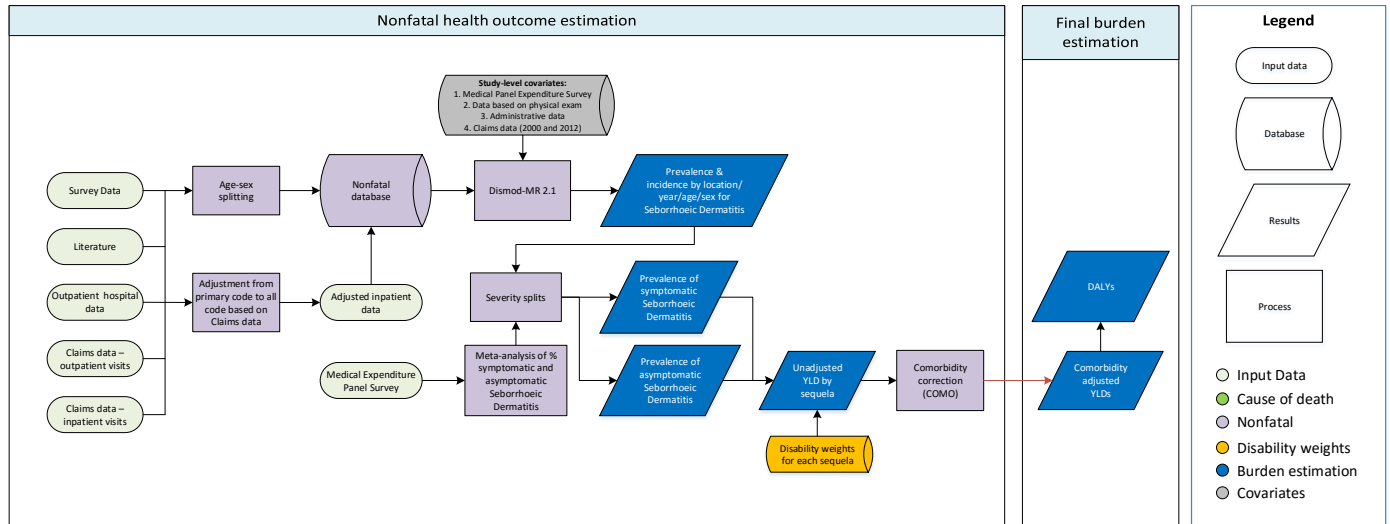

### Case definition

Dermatitis was included in the GBD 2016 cause group of skin and subcutaneous conditions and consists of atopic dermatitis, contact dermatitis, and seborrhoeic dermatitis. Dermatitis, or eczema, refers to an inflammation of the skin. Atopic dermatitis is an inflammatory, relapsing, and non-contagious skin disorder characterized by an itchy rash (ICD-10: L20) (1). Contact dermatitis is a localized rash or irritation of the skin caused by allergens or irritants (ICD: 10: L22-26) (1). Seborrhoeic dermatitis is an inflammatory skin disorder affecting the sebaceous-gland-rich areas of skin, generally the scalp, face, and torso (ICD-10: L21) (1). It is characterized by scaly, flaky, itchy, and red skin on the affected area. We estimated burden separately for atopic dermatitis, contact dermatitis, and seborrhoeic dermatitis in order to better accommodate differences in the epidemiology and burden between the subtypes of dermatitis.

### Input data

#### Model inputs

In the GBD 2010, a literature-based dataset was provided by the skin conditions expert group. Data from the Medical Expenditure Panel Survey (MEPS) in the United States in 2000–2009 (2) were also included to inform the age pattern of the prevalence output. Data from the NHANES study and the NHIS study (both from the US) were not extracted, as questions regarding dermatitis were too broad (ie, asked whether a respondent had experienced eczema or any other rash). Dermatitis (known as “eczema”) was modelled as a single disorder. For GBD 2013, the literature was updated and dermatitis was disaggregated into eczema, contact dermatitis, and seborrhoeic dermatitis. The agreed-upon approach for dermatitis diseases was to undertake a literature review every two years. Therefore, we undertook a new literature review for GBD 2016. The data for dermatitis were expanded based on recommendations of research articles and reviews by the skin expert group. Additionally, hospital outpatient and US claims data for 2000, 2010, and 2012 were used, where appropriate. Data were outliered or excluded if we found them unreasonable when compared to regional, super-regional, and global rates. See descriptions of individual modelling approaches for more information.

**Table 1. Model inputs**

|                       |                        | Prevalence | Incidence |
|-----------------------|------------------------|------------|-----------|
| Atopic dermatitis     | Studies                | 197        | 0         |
|                       | Countries/subnationals | 227        | 0         |
|                       | Countries              | 96         | 0         |
|                       | GBD world regions      | 19         | 0         |
|                       | GBD super-regions      | 7          | 0         |
| Contact dermatitis    | Studies                | 24         | 1         |
|                       | Countries/subnationals | 68         | 1         |
|                       | Countries              | 14         | 1         |
|                       | GBD world regions      | 8          | 1         |
|                       | GBD super-regions      | 6          | 1         |
| Seborrheic dermatitis | Studies                | 24         | 1         |
|                       | Countries/subnationals | 71         | 1         |
|                       | Countries              | 19         | 1         |
|                       | GBD world regions      | 10         | 1         |
|                       | GBD super-regions      | 7          | 1         |

*Severity splits and disability weights*

The basis of the GBD disability weight survey assessments are lay descriptions of sequelae highlighting major functional consequences and symptoms. Severity was split into three levels of disfigurement with pain/itch. The severity splits and disability weights applied in GBD 2015 were also used for GBD 2016. See below for a lay descriptions of the severity levels.

**Table 2. Severity level and lay description.**

| Sequela                    | Severity level                         | Lay description                                                                                                                                                                          | DW (95% CI)         |
|----------------------------|----------------------------------------|------------------------------------------------------------------------------------------------------------------------------------------------------------------------------------------|---------------------|
| Mild atopic dermatitis     | Disfigurement, level 1 with itch/pain  | The person has a slight, visible physical deformity that is sometimes sore or itchy. Others notice the deformity, which causes some worry and discomfort.                                | 0.027 (0.015–0.042) |
| Moderate atopic dermatitis | Disfigurement, level 2, with itch/pain | The person has a visible physical deformity that is sore and itchy. Other people stare and comment, which causes the person to worry. The person has trouble sleeping and concentrating. | 0.188 (0.124–0.267) |

|                                   |                                        |                                                                                                                                                                                                                                       |                     |
|-----------------------------------|----------------------------------------|---------------------------------------------------------------------------------------------------------------------------------------------------------------------------------------------------------------------------------------|---------------------|
| Severe atopic dermatitis          | Disfigurement, level 3, with itch/pain | The person has an obvious physical deformity that is very painful and itchy. The physical deformity makes others uncomfortable, which causes the person to avoid social contact, feel worried, sleep poorly, and think about suicide. | 0.576 (0.401–0.731) |
| Mild contact dermatitis           | Disfigurement, level 1 with itch/pain  | The person has a slight, visible physical deformity that is sometimes sore or itchy. Others notice the deformity, which causes some worry and discomfort.                                                                             | 0.027 (0.015–0.042) |
| Moderate contact dermatitis       | Disfigurement, level 2, with itch/pain | The person has a visible physical deformity that is sore and itchy. Other people stare and comment, which causes the person to worry. The person has trouble sleeping and concentrating.                                              | 0.188 (0.124–0.267) |
| Symptomatic seborrheic dermatitis | Disfigurement, level 1 with itch/pain  | The person has a slight, visible physical deformity that is sometimes sore or itchy. Others notice the deformity, which causes some worry and discomfort.                                                                             | 0.027 (0.015–0.042) |

### Modelling strategy

DisMod-MR 2.1 was used to estimate prevalence by age, sex, year, and geography (subnational [select countries], country, region, super-region) for atopic dermatitis, contact dermatitis, and seborrheic dermatitis. Separate models were run for each cause.

**Atopic dermatitis:** Since our available data mostly contained information on prevalence, we specified additional expert priors to further inform analyses. Excess mortality was set to zero while a setting of 0-0.2 (equivalent to five years to life time duration) was placed on remission. Study-level covariates were used to adjust prevalence estimates from the Medical Expenditure Panel Survey (MEPS), US claims data for 2000, 2010, and 2012, self-reported data, and administrative data toward data based on clinical examination. To improve regional and global estimates, the minimum coefficient of variation was set at 0.4 and location random effects for Paraguay, Sweden, and England were restricted to [-0.25, 0.25], [-



0.25, 0.25], and [-0.5, 0.5], respectively. A time window of 10 years was used to determine which data points were used for a particular year of fit.

**Contact dermatitis:** Similar to atopic dermatitis, mostly prevalence data were available for contact dermatitis. Per expert advice, the remission parameter was set from 0.1 to 4, excess mortality was set to zero, and incidence was set to zero prior to age 6. Study-level covariates were used to adjust data from the Medical Expenditure Panel Survey (MEPS), outpatient data, administrative data, self-reported data, data based on a one-year recall, and claims data for 2000 and 2010 toward the values in the 2012 claims data. In order to improve model estimates, location random effects were added for Sweden [-2, 2], Norway [-2, 2], Denmark [0, 0.5], Italy [-2, 2], Germany [-2, 2], and France [-0.5, 0]. “A time window of 25 years was used to determine which data points were used for a particular year of fit.

**Seborrheic dermatitis:** As with contact dermatitis, the available data were mostly prevalence estimates. Per expert advice, settings were placed on incidence as follows: 0-4 years = 0-0.1, and 60-100 = 0-0.01. Excess mortality was set to zero while a setting of 0.1-12 was placed on remission, implying a duration of one month to 10 years. Study-level covariates were used to adjust prevalence estimates from US claims data for 2000 and 2010, MEPS, administrative data, and clinical exam data toward other data points.

**Table 3. Study-level beta and exponentiated values**

|                        | Study covariate         | Parameter  | Beta                  | Exp(beta)          |
|------------------------|-------------------------|------------|-----------------------|--------------------|
| Atopic dermatitis      | MEPS                    | Prevalence | -1.08 (-1.23 - -0.95) | 0.34 (0.29 - 0.39) |
|                        | Self-reported           | Prevalence | 0.39 (0.34 - 0.44)    | 1.48 (1.41 - 1.56) |
|                        | Administrative data     | Prevalence | -0.33 (-0.54 - -0.12) | 0.72 (0.58 - 0.89) |
|                        | Claims data - 2000      | Prevalence | -1.90 (-1.99 - -1.83) | 0.15 (0.14 - 0.16) |
|                        | Claims data - 2010      | Prevalence | -1.51 (-1.60 - -1.43) | 0.22 (0.20 - 0.24) |
|                        | Claims data - 2012      | Prevalence | -1.47 (-1.56 - -1.40) | 0.23 (0.21 - 0.25) |
| Contact dermatitis     | MEPS                    | Prevalence | -0.36 (-0.79 - -0.03) | 0.69 (0.46 - 0.97) |
|                        | Outpatient              | Prevalence | -0.90 (-1.82 - -0.05) | 0.41 (0.16 - 0.95) |
|                        | Recall 1 year           | Prevalence | -0.18 (-1.02 - 0.86)  | 0.83 (0.36 - 2.37) |
|                        | Self-reported           | Prevalence | 1.65 (0.98 - 1.99)    | 5.23 (2.68 - 7.30) |
|                        | Administrative data     | Prevalence | 1.20 (-0.14 - 1.97)   | 3.32 (0.87 - 7.16) |
|                        | Claims data - 2000      | Prevalence | 0.32 (0.24 - 0.39)    | 1.37 (1.27 - 1.48) |
|                        | Claims data - 2010      | Prevalence | 0.53 (0.47 - 0.60)    | 1.70 (1.59 - 1.81) |
| Seborrhoeic dermatitis | Diagnosis Physical Exam | Prevalence | 1.72 (1.03 - 2.00)    | 5.61 (2.82 - 7.39) |
|                        | MEPS                    | Prevalence | -1.96 (-2.00 - -1.86) | 0.14 (0.14 - 0.16) |
|                        | Administrative data     | Prevalence | 1.83 (1.30 - 2.00)    | 6.22 (3.65 - 7.39) |
|                        | Claims data - 2000      | Prevalence | -0.31 (-0.36 - -0.20) | 0.73 (0.69 - 0.82) |
|                        | Claims data - 2010      | Prevalence | 0.14 (0.10 - 0.25)    | 1.15 (1.10 - 1.28) |

# Psoriasis

## Flowchart

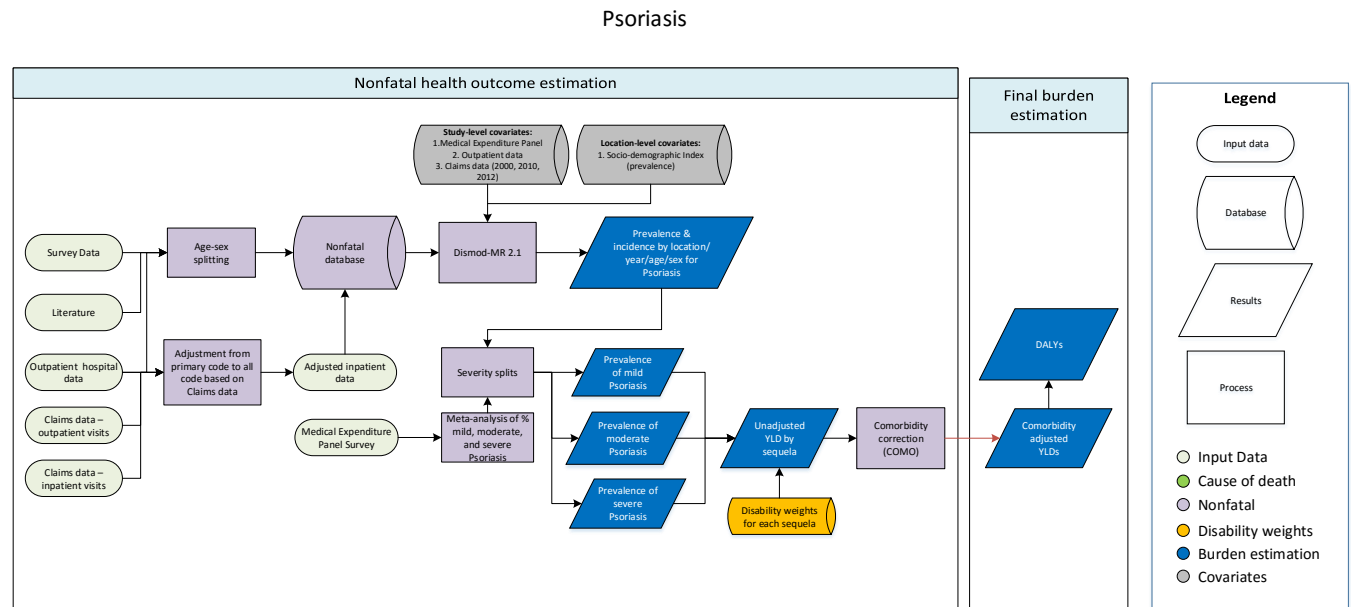

## Case definition

Psoriasis was included in the GBD 2016 cause group of skin and subcutaneous conditions. According to the International Classification of Diseases (ICD-10), it is a skin disease marked by itchy or sore patches of thick, red skin with silvery scales (ICD-10: L40, L41) (1,2).

## Input data

### *Model inputs*

In the GBD 2010 study, a systematic review of the literature was conducted using PubMed and Google Scholar to capture epidemiological data for psoriasis. The literature search also included any relevant data from the Medical Expenditure Panel Survey (MEPS) in the United States for 2000–2009, the Australian National Health Survey 1995–1996, 2001, 2004–2005, 2007–2008, and the US National Health and Nutrition Examination Survey (NHANES) in 2002 and 2005.

The inclusion criteria stipulated that studies (1) must be published between 1980 and 2012; (2) must provide data on the incidence or prevalence of psoriasis; (3) must use samples representative of the general population (ie, samples derived from the experimental arm of clinical trials or based in dermatology clinics were excluded); (4) must use a sample size larger than 100; and (5) must provide sufficient information on study method and sample characteristics to assess the quality of the study. For GBD 2013, the GBD 2010 search strategy was replicated to capture epidemiological studies published between 2012 and 2014. The agreed-upon approach for psoriasis was to undertake a literature review every two years. Therefore, we conducted an updated literature review through October 1, 2016, for GBD

2016. Hospital outpatient and US claims data from 2000, 2010, and 2012 were also included in GBD 2016. Data were outliered or excluded if we found them unreasonable when compared to regional, super-regional, and global rates.

**Table 1. Data inputs**

|                        | Prevalence | Incidence |
|------------------------|------------|-----------|
| Studies                | 72         | 6         |
| Countries/subnationals | 92         | 2         |
| Countries              | 30         | 3         |
| GBD world regions      | 13         | 2         |
| GBD super-regions      | 6          | 1         |

*Severity splits*

As was the case in GBD 2010, GBD 2013, and GBD 2015, disability weights were estimated for disfigurement with itch/pain, levels 1, 2, and 3. The disability weights used for GBD 2015 were also used in 2016.

**Table 2. Severity level and lay description.**

| Sequela            | Severity level                         | Lay description                                                                                                                                                                                                                           | DW (95% CI)         |
|--------------------|----------------------------------------|-------------------------------------------------------------------------------------------------------------------------------------------------------------------------------------------------------------------------------------------|---------------------|
| Mild psoriasis     | Disfigurement, level 1 with itch/pain  | The individual has a slight, visible physical deformity that is sometimes sore or itchy. Others notice the deformity, which causes some worry and discomfort.                                                                             | 0.027 (0.015–0.042) |
| Moderate psoriasis | Disfigurement, level 2, with itch/pain | The individual has a visible physical deformity that is sore and itchy. Other people stare and comment, which causes the person to worry. The person has trouble sleeping and concentrating.                                              | 0.188 (0.124–0.267) |
| Severe psoriasis   | Disfigurement, level 3, with itch/pain | The individual has an obvious physical deformity that is very painful and itchy. The physical deformity makes others uncomfortable, which causes the person to avoid social contact, feel worried, sleep poorly, and think about suicide. | 0.576 (0.401–0.731) |

## Modelling strategy

DisMod-MR 2.1, a Bayesian meta-regression tool, was used to estimate prevalence by age, sex, year, and geography (subnational [select countries], country, region, super-region) for psoriasis.

Psoriasis was modelled with remission set between 0.05 and 0.15, implying a duration between 6.6 and 20 years. This was in line with the available epidemiological data, expert opinion, and previous GBD work. Excess mortality was assumed to be zero. The datasets for psoriasis were sufficiently large to make use of a relatively short time window of 10 years to determine which data points were used for a particular year of fit.

Study-level covariates were used to adjust incidence derived from the Medical Expenditure Panel Survey (MEPS) and US claims data for 2000, 2010, and 2012, and outpatient data toward the level of other prevalence and incidence data points, which were more representative of the general population. Additionally, the data were extremely heterogeneous. Therefore, the random effects were constrained to (-0.25, 0.25) except in China (0, 0.5) and Taiwan (-0.5, 0). SDI was used as a location-level covariate to guide estimates for countries with few or no data.

**Table 3. Study-level beta and exponentiated values**

| Covariate          | Parameter  | Beta                  | Exp(beta)          |
|--------------------|------------|-----------------------|--------------------|
| MEPS               | Prevalence | -0.98 (-1.15 - -0.88) | 0.37 (0.32 - 0.42) |
| Outpatient         | Prevalence | -0.57 (-0.62 - -0.52) | 0.56 (0.54 - 0.59) |
| Claims data - 2000 | Prevalence | -1.21 (-1.25 - -1.17) | 0.30 (0.29 - 0.31) |
| Claims data - 2010 | Prevalence | -0.96 (-0.98 - -0.92) | 0.38 (0.38 - 0.40) |
| Claims data - 2012 | Prevalence | -0.88 (-0.90 - -0.84) | 0.42 (0.41 - 0.43) |

**Table 4. Location-level beta and exponentiated values**

| Covariate               | Parameter  | Beta               | Exp(beta)          |
|-------------------------|------------|--------------------|--------------------|
| Socio-demographic Index | Prevalence | 1.91 (1.77 — 1.99) | 6.73 (5.90 — 7.34) |

# Cellulitis

## Flowchart

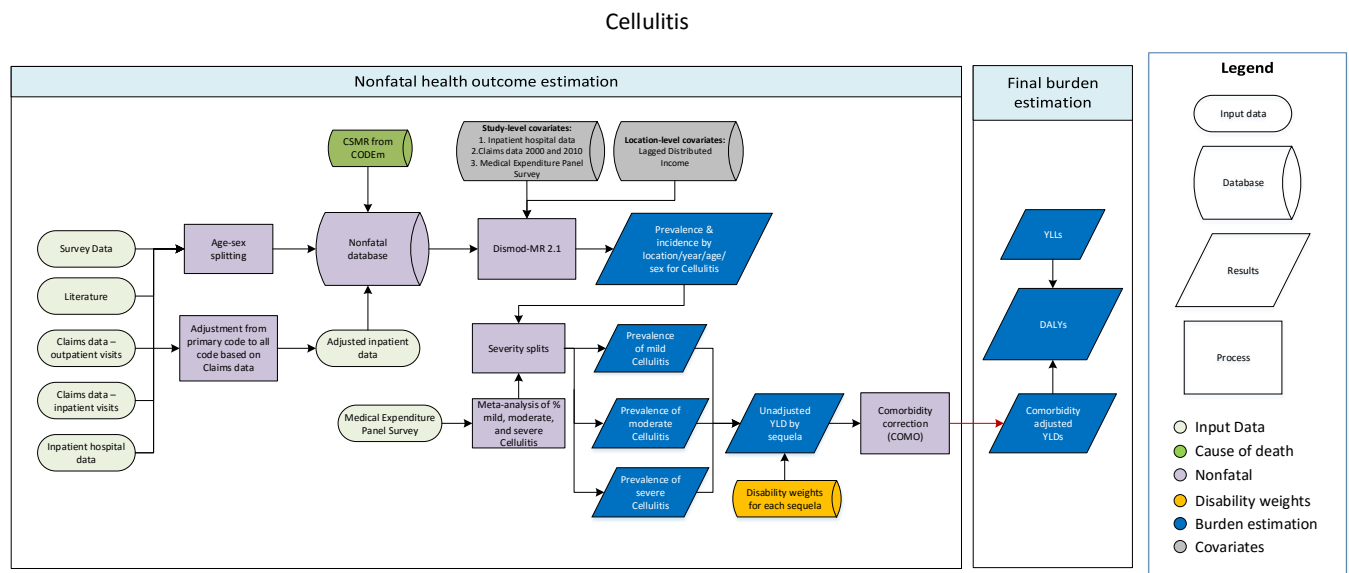

## Case definition

Cellulitis was included in the GBD 2016 cause group of skin and subcutaneous conditions. Cellulitis is a skin disease marked by a bacterial infection that affects and spreads through the skin and soft tissues. Symptoms of cellulitis include pain, tenderness, and reddening in the affected area, fever, chills, and lymphadenopathy (ICD-10: L03) (1).

## Input data

### Model inputs

In the GBD 2010 study, a systematic review of the literature was conducted using PubMed and Google Scholar to capture epidemiological data for cellulitis. Due to lack of published data on the epidemiology of cellulitis, the literature search also included relevant incidence data from national inpatient or outpatient records in Europe, North America, and Latin America. When years in the national data from the hospital records overlapped, inpatient and outpatient data were summed together in an effort to better estimate the population incidence of cellulitis. The final dataset also included survey data from the Medical Expenditure Panel Survey (MEPS), US claims data, and cause-specific mortality rates for cellulitis estimated by CODEm.

The inclusion criteria stipulated that studies (1) must be published between 1980 and 2012; (2) must provide data on the incidence or prevalence of cellulitis; (3) must use samples representative of the general population (ie, samples derived from the experimental arm of clinical trials or based in dermatology clinics were excluded); (4) must use a sample size larger than 100; and (5) must provide sufficient information on study method and sample characteristics to assess the quality of the study. For GBD 2013, the GBD 2010 search strategy was replicated to capture epidemiological studies published between 2012 and 2014. In addition, hospital inpatient data and data from US claims for 2000, 2010, and 2012 by US state were included in GBD 2016. Data were outliered or excluded if we found them unreasonable when compared to regional, super-regional, and global rates.

**Table 1. Model inputs (not including hospital inpatient data)**

|                        | Prevalence | Incidence |
|------------------------|------------|-----------|
| Studies                | 0          | 3         |
| Countries/subnationals | 0          | 318       |
| Countries              | 0          | 38        |
| GBD world regions      | 0          | 15        |
| GBD super-regions      | 0          | 7         |

*Severity splits*

The basis of the GBD disability weight survey assessments are lay descriptions of sequelae highlighting major functional consequences and symptoms. Severity splits for cellulitis were calculated via the Medical Expenditure Panel Survey (MEPS) regression and outlined in the table below.

**Table 2. Severity level and lay description.**

| Sequela             | Severity level                              | Lay description                                                                                        | DW (95% CI)         |
|---------------------|---------------------------------------------|--------------------------------------------------------------------------------------------------------|---------------------|
| Mild cellulitis     | Infectious disease, acute episode, mild     | This person has a low fever and mild discomfort, but no difficulty with daily activities.              | 0.006 (0.002–0.012) |
| Moderate cellulitis | Infectious disease, acute episode, moderate | This person has a fever and aches, and feels weak, which causes some difficulty with daily activities. | 0.051 (0.032–0.074) |
| Severe cellulitis   | Infectious disease, acute episode, severe   | This person has a high fever and pain, and feels                                                       | 0.133 (0.088–0.19)  |

|  |  |                                                                 |  |
|--|--|-----------------------------------------------------------------|--|
|  |  | very weak, which causes great difficulty with daily activities. |  |
|--|--|-----------------------------------------------------------------|--|

### Modelling strategy

DisMod-MR 2.1, a Bayesian meta-regression tool, was used to estimate cellulitis prevalence by age, sex, year, and geography (subnational [select countries], country, region, super-region). Cellulitis was modeled with remission set between 12 and 30, implying a duration of 12 days to one month. This was in line with the available epidemiological data, expert opinion, and previous GBD work. The cellulitis dataset was sufficiently large to make use of a relatively short time window of five years to determine which data points were used for a particular year of fit.

Study-level covariates were used to adjust incidence derived from MEPS, hospital inpatient data, and US claims data for 2000 and 2010 toward the level of other incidence data points, which were more representative of the general population. US claims data for 2000 and 2010 were set at a maximum of zero, whereas MEPS and inpatient data were set with a maximum of two. Log-transformed lagged distributed income (LDI) was used as a location-level covariates to guide estimates for locations with little or no data. LDI was restricted to a range of -0.5 to -0.1.

**Table 3. Study-level beta and exponentiated values**

| Covariate          | Parameter | Beta                  | Exp(beta)          |
|--------------------|-----------|-----------------------|--------------------|
| MEPS               | Incidence | -1.97 (-2.00 - -1.91) | 0.14 (0.14 - 0.15) |
| Claims data - 2000 | Incidence | -0.52 (-0.55 - -0.49) | 0.60 (0.58 - 0.61) |
| Claims data - 2010 | Incidence | -0.06 (-0.09 - -0.04) | 0.94 (0.92 - 0.97) |

**Table 4. Location-level beta and exponentiated values**

| Covariate | Parameter             | Beta                  | Exp(beta)          |
|-----------|-----------------------|-----------------------|--------------------|
| Log (LDI) | Excess mortality rate | -0.50 (-0.50 — -0.50) | 0.61 (0.61 — 0.61) |

# Pyoderma

## Flowchart

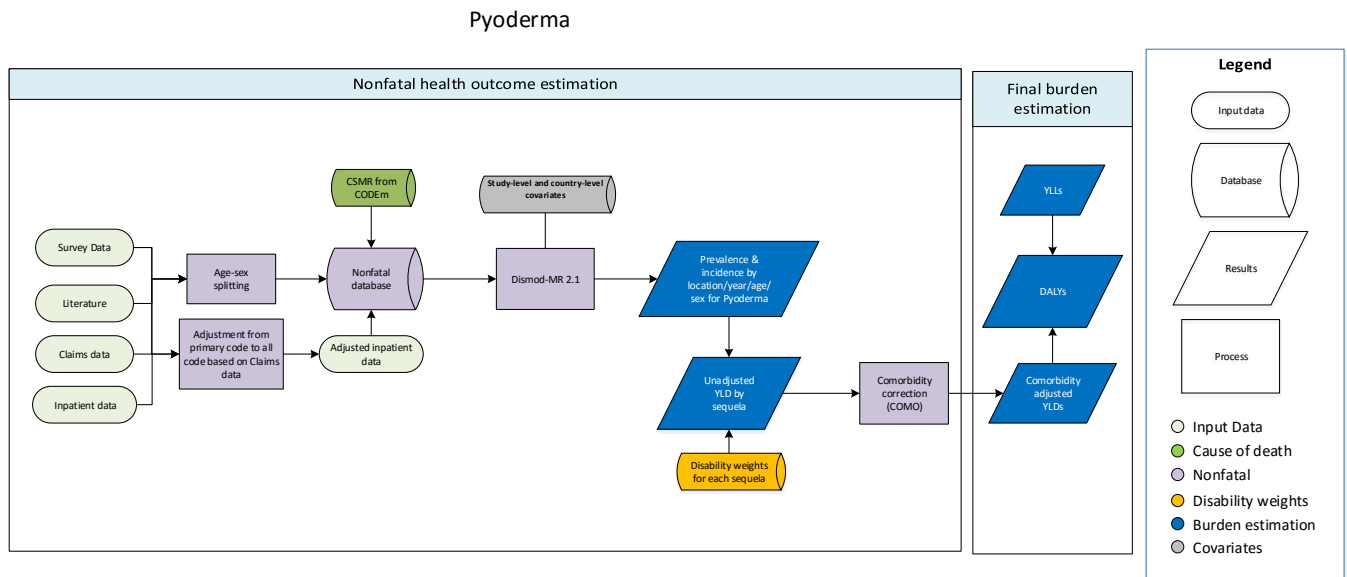

## Case definition

Pyoderma refers to any skin disease that is pyogenic, ie, involves the development of pus. These include superficial bacterial conditions such as impetigo, furuncles, ulcers, and abscesses. For GBD 2016, pyoderma was modelled as two separate groups: impetigo, and abscess and other bacterial skin diseases. Impetigo is a highly contagious bacterial skin infection often characterized by red sores, which eventually leak pus or fluid (ICD-10: L01). An abscess is a collection of pus that builds up within the tissue of the body, with carbuncles and furuncles being examples of specific types of abscess. The abscess and other bacterial skin diseases group included all bacterial skin diseases except impetigo (ICD-10: L00, L02, L04, L05, L08).

## Input data

### Model inputs

For both impetigo and abscess and other bacterial skin diseases in GBD 2010, a literature review was conducted using PubMed and Google Scholar. The inclusion criteria were studies which were published between 1980 and 2010 and provided data on relevant disease incidence or prevalence. Exclusion criteria were studies with no incidence or prevalence data provided, not community- or population-based, outside of year range, sample size smaller than 100, experimental arm of clinical trial, papers that provided estimates rather than data, and studies that were based in dermatology clinics. The agreed approach for pyoderma disease was to undertake a literature review every two years. Therefore, no literature review was undertaken for GBD 2015. For GBD 2016, the GBD 2013 search strategy was replicated to capture epidemiological studies published between 2014 and 2016. Hospital inpatient data were used as model inputs for abscesses and other bacterial skin diseases, but were omitted for



impetigo, as the adjustment factor from primary diagnoses codes to all diagnoses codes were found to be implausible.

**Table 1. Data inputs**

|                                           |                        | Prevalence | Incidence |
|-------------------------------------------|------------------------|------------|-----------|
| Impetigo                                  | Studies                | 8          | 2         |
|                                           | Countries              | 6          | 3         |
|                                           | Countries/subnationals | 6          | 53        |
|                                           | GBD world regions      | 4          | 1         |
| Abscess and other bacterial skin diseases | Studies                | 1          | 0         |
|                                           | Countries              | 2          | 38        |
|                                           | Countries/subnationals | 2          | 322       |
|                                           | GBD world regions      | 1          | 7         |

*Severity splits and disability weights*

Information on the distribution of cases of impetigo and abscess and other bacterial skin diseases, asymptomatic, and within disfigurement levels 1 and 2, were obtained from the MEPS. The symptomatic cases were assigned the disability weight of a mild acute infectious disease case.

**Table 2. Severity level and lay description**

| Sequela                                     | Severity level                          | Lay description                                                                          | DW (95% CI)         |
|---------------------------------------------|-----------------------------------------|------------------------------------------------------------------------------------------|---------------------|
| Impetigo                                    | Infectious disease, acute episode, mild | The person has a low fever and mild discomfort, but no difficulty with daily activities. | 0.006 (0.002–0.012) |
| Abscesses and other bacterial skin diseases | Infectious disease, acute episode, mild | The person has a low fever and mild discomfort, but no difficulty with daily activities. | 0.006 (0.002–0.012) |

**Modelling strategy**

DisMod-MR 2.1 was used to estimate prevalence by age, sex, year, and geography (country, region, super-region) for impetigo and abscess and other bacterial skin diseases. Separate models were run for each disease.

**Impetigo:** Per expert advice, we assumed a remission of 17 to 20, equating to a duration between approximately two and three weeks. A value prior was also placed on incidence, restricting the range between zero and one. In addition, study-level covariates were placed on incidence to adjust US claims

data for 2000 and 2010 toward the reference literature data and US 2012 claims data. A country-level covariate, log transformed lagged distributed income (I\$ per capita), which represents a moving average of gross domestic product (GDP) over time, was also included to inform prevalence and excess mortality estimates. We also used the cause-specific mortality rates for pyoderma estimated using CODEm. We used a time window of 5 years to determine which data points were used for a particular year of fit.

**Abscess and other bacterial skin diseases:** Per expert advice, a remission setting of 17 to 30 was applied, which equated to a duration of two to six weeks. Study-level covariates adjusted incidence estimates from US claims data for 2000 and 2010 and hospital inpatient data toward the reference literature data and US 2012 claims data. We also used the cause-specific mortality rates for pyoderma estimated using CODEm. In addition, we used a log transformed lagged distributed income (I\$ per capita) country covariates on excess mortality. We used a time window of 5 years to determine which data points were used for a particular year of fit.

**Table 3. Beta and exponentiated values**

*Impetigo*

| <b>Covariate type</b> | <b>Covariate</b>     | <b>Parameter</b>      | <b>beta</b>           | <b>Exponentiated beta</b> |
|-----------------------|----------------------|-----------------------|-----------------------|---------------------------|
| Study-level covariate | Claims data - 2000   | Incidence             | -0.30 (-0.32 - -0.28) | 0.74 (0.72 - 0.75)        |
| Study-level covariate | Claims data - 2010   | Incidence             | -0.09 (-0.10 - -0.07) | 0.92 (0.90 - 0.93)        |
| Country covariate     | LDI (I\$ per capita) | Prevalence            | 0.09 (0.00 - 0.33)    | 1.09 (1.00 - 1.40)        |
| Country covariate     | LDI (I\$ per capita) | Excess mortality rate | -0.20 (-0.20 - -0.20) | 0.82 (0.82 - 0.82)        |

*Abscesses and other bacterial skin diseases*

| <b>Covariate type</b> | <b>Covariate</b>     | <b>Parameter</b>      | <b>beta</b>           | <b>Exponentiated beta</b> |
|-----------------------|----------------------|-----------------------|-----------------------|---------------------------|
| Study-level covariate | Hospital Inpatient   | Incidence             | -2.40 (-2.40 - -2.39) | 0.09 (0.09 - 0.09)        |
| Study-level covariate | Claims data - 2000   | Incidence             | -0.32 (-0.35 - -0.28) | 0.73 (0.70 - 0.76)        |
| Study-level covariate | Claims data - 2010   | Incidence             | 0.02 (-0.01 - 0.05)   | 1.02 (0.99 - 1.05)        |
| Country covariate     | LDI (I\$ per capita) | Excess mortality rate | -0.18 (-0.20 - -0.17) | 0.83 (0.82 - 0.85)        |

# Scabies

## Flowchart

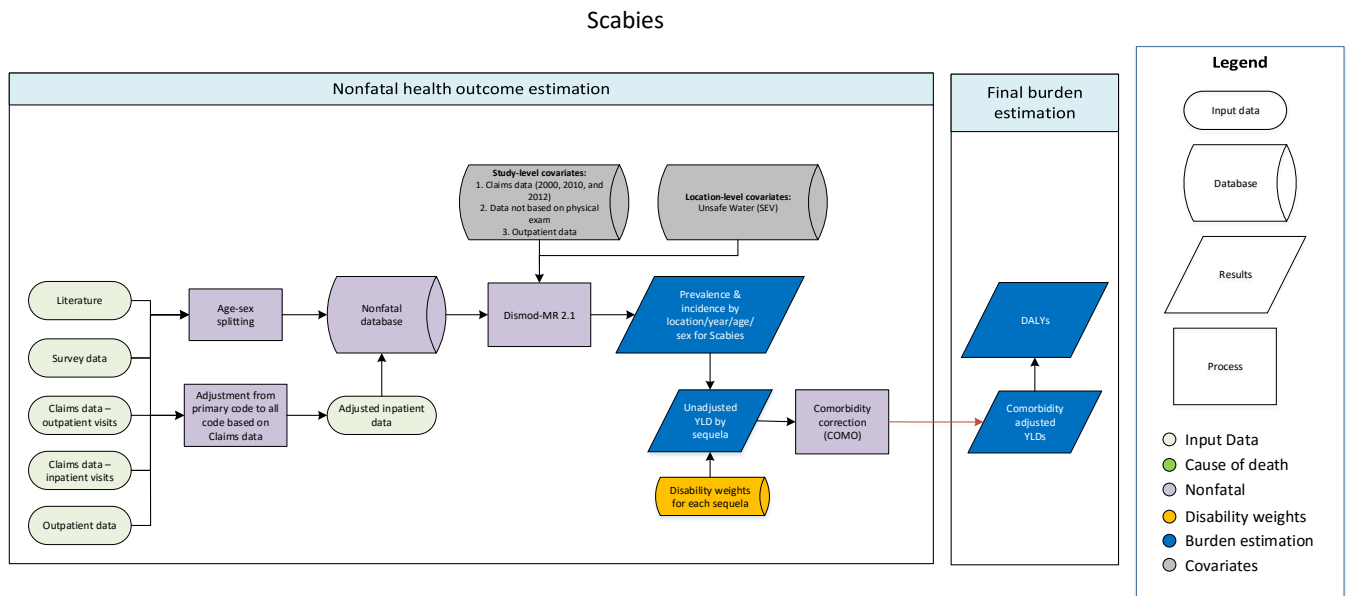

## Case definition

Scabies was included in the GBD 2016 cause group of skin and subcutaneous conditions. According to the International Classification of Diseases (ICD-10), scabies is a skin disease caused by the microscopic mite *Sarcoptes scabiei*. The main symptom is an itchy, pimple-like rash (ICD-10: B86) (1).

## Input data

### Model inputs

In the GBD 2010 study, a systematic review of the literature was conducted using PubMed and Google Scholar to capture epidemiological data for scabies. The inclusion criteria stipulated that studies (1) must be published between 1980 and 2012; (2) must provide data on the incidence or prevalence of scabies; (3) must use samples representative of the general population (ie, samples derived from the experimental arm of clinical trials or based in dermatology clinics were excluded); (4) must use a sample size larger than 100; and (5) must provide sufficient information on study method and sample characteristics to assess the quality of the study. For GBD 2013, the GBD 2010 search strategy was replicated to capture epidemiological studies published between 2012 and 2014. The agreed-upon approach for scabies was to undertake a literature review every two years. Therefore, we updated the systematic review through October 6, 2016, for GBD 2016. Additionally, US claims data from 2000, 2010, and 2012 were included in GBD 2016. Data were outliered or excluded if we found them unreasonable when compared to regional, super-regional, and global rates.

**Table 1. Data inputs**

|                        | Prevalence | Incidence |
|------------------------|------------|-----------|
| Studies                | 68         | 20        |
| Countries/subnationals | 85         | 6         |
| Countries              | 33         | 5         |
| GBD world regions      | 17         | 4         |
| GBD super-regions      | 7          | 3         |

*Severity splits*

Scabies was assigned the disability weight for disfigurement level 1. The disability weights used for GBD 2015 were also used for GBD 2016.

**Table 2. Severity level and lay descriptions**

| Severity level                        | Lay description                                                                                                                                               | DW (95% CI)         |
|---------------------------------------|---------------------------------------------------------------------------------------------------------------------------------------------------------------|---------------------|
| Disfigurement, level 1 with itch/pain | The individual has a slight, visible physical deformity that is sometimes sore or itchy. Others notice the deformity, which causes some worry and discomfort. | 0.027 (0.015–0.042) |

**Modelling strategy**

DisMod-MR 2.1, a Bayesian meta-regression tool, was used to estimate scabies prevalence by age, sex, year, and geography (subnational [select countries], country, region, super-region).

Scabies was modelled with remission set between 2.5 and 3.5, implying four to five months of duration, and excess mortality was assumed to be zero. This was in line with the available epidemiological data, expert opinion, and previous GBD work.

The datasets for scabies were sufficiently large to make use of a relatively short time window of five years to determine which data points were used for a particular year of fit. Additionally, to improve estimation across all regions, we restricted location random effects to (-0.25, 0.25) in Cambodia, Mali, Nepal, Fiji, Timor-Leste, Vanuatu, the Oceania, Southeast Asia, and East Asia GBD regions, and the corresponding super-region. We also restricted the random effect in Kenya (0, 0.5). We used the unsafe water SEV (summary exposure value) as a location-level covariate and set the minimum coefficient of variation at 0.4.

Study-level covariates were used to adjust prevalence derived from outpatient data, US claims data for 2000, 2010, and 2012, and data not based on clinical exams toward the level of other prevalence and incidence data points, which were more representative of the general population.

**Table 3. Study-level beta and exponentiated values**

| Covariate                                   | Parameter  | Beta                  | Exp(beta)          |
|---------------------------------------------|------------|-----------------------|--------------------|
| Claims data - 2000                          | Prevalence | -1.91 (-2.00 — -1.82) | 0.15 (0.14 — 0.16) |
| Claims data - 2010                          | Prevalence | -1.51 (-1.62 — -1.43) | 0.22 (0.20 — 0.24) |
| Claims data - 2012                          | Prevalence | -1.29 (-1.39 — -1.20) | 0.27 (0.25 — 0.30) |
| Data was not based on physical examinations | Prevalence | -1.36 (-1.72 — -0.98) | 0.26 (0.18 — 0.37) |
| Outpatient                                  | Prevalence | 1.83 (1.70 — 1.97)    | 6.26 (5.45 — 7.14) |

**Table 4. Location-level beta and exponentiated values**

| Covariate          | Parameter  | Beta               | Exp(beta)          |
|--------------------|------------|--------------------|--------------------|
| Unsafe water (SEV) | Prevalence | 1.98 (1.94 — 2.00) | 7.24 (6.92 — 7.38) |

# Fungal Skin Diseases

## Flowchart

### Tinea Capitis

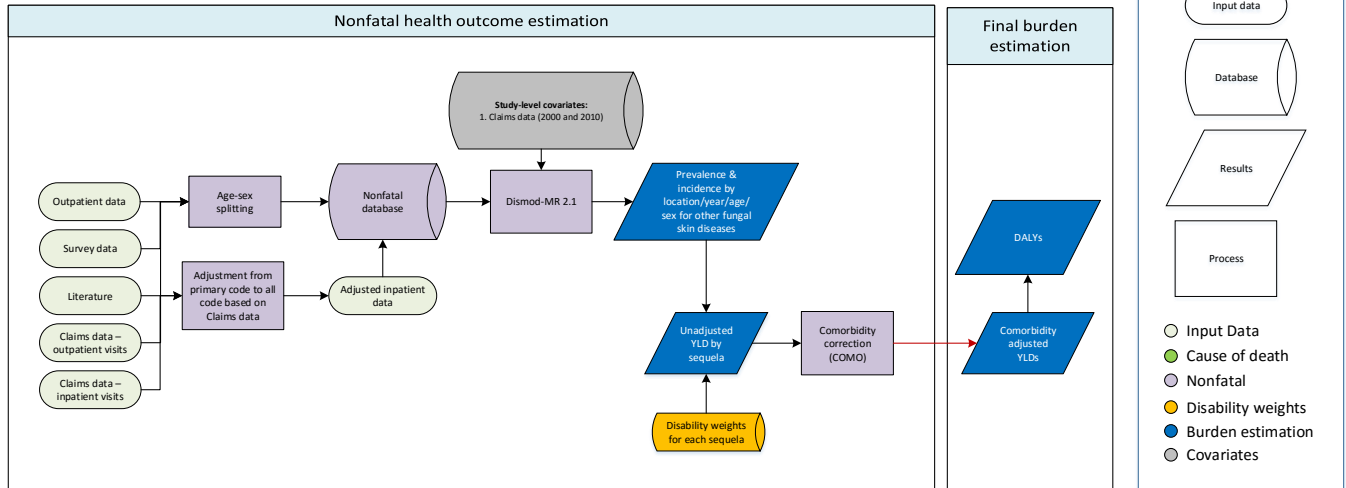

### Other Fungal Skin Diseases

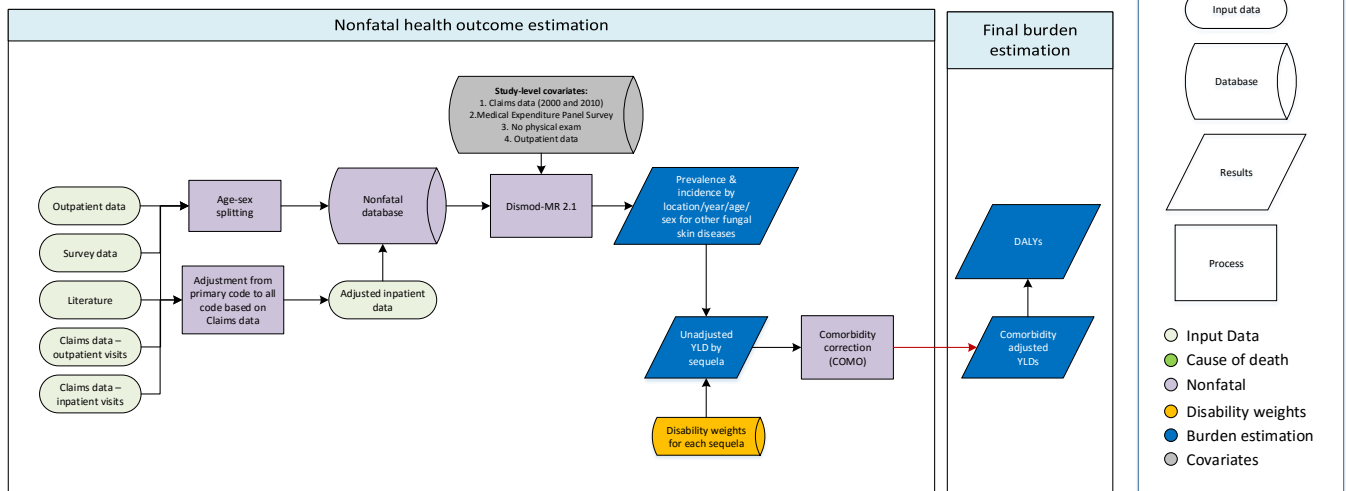

## Case definition

Fungal diseases were included in the GBD 2016 cause group of skin and subcutaneous conditions and consisted of tinea capitis and a residual group of “any” other fungal disease. Similar to GBD 2015, tinea capitis was modelled separately from the other fungal skin diseases. This was done to better accommodate differences in burden between tinea capitis and other subtypes of fungal skin diseases.

Tinea capitis is a fungal infection of the scalp and associated hair. It is characterized by the appearance of thickened scaly swellings or as expanding raised red rings (ringworm), mainly caused by species of *Microsporum*, *Trichophyton*, and *Epidermophyton* (ICD-10: B35.0) (1).

The residual group of “any” other fungal skin disease included any fungal skin disease that was specifically not tinea capitis or onychomycosis (ie, fungal nail infection). The ICD-10 (1) list of other fungal skin diseases includes tinea manuum (ICD-10: B35.2), or hand ringworm; tinea pedis (ICD-10: B35.3), or athlete’s foot; tinea corporis (ICD-10:B35.4), or ringworm of the body; tinea imbricata (ICD-10:B35.5), a superficial fungal infection limited to parts of Asia and Central America; tinea cruris (ICD-10:B35.6), also known as dhobi itch, groin ringworm, or jock itch. In GBD 2016, we added dermatophytosis (ICD-10:B35.9).

## Input data

### *Model inputs*

For GBD 2010, a systematic review of the literature using PubMed and Google Scholar was conducted to capture epidemiological data for fungal skin diseases. The literature search also included any relevant data from the Medical Expenditure Panel Survey (MEPS) in the United States in 2000–2009. The inclusion criteria stipulated that studies (1) must be published between 1980 and 2012; (2) must provide data on the incidence or prevalence of fungal skin diseases; (3) must use samples representative of the general population (ie, samples derived from the experimental arm of clinical trials or based in dermatology clinics were excluded); (4) must use a sample size larger than 100; and (5) must provide sufficient information on study method and sample characteristics to assess the quality of the study. For GBD 2013, the GBD 2010 search strategy was replicated to capture epidemiological studies published between 2012 and 2014. Data were outliered or excluded if we found them unreasonable when compared to regional, super-regional, and global rates.

**Table 1. Data inputs**

|                            |                        | Prevalence | Incidence |
|----------------------------|------------------------|------------|-----------|
| Tinea capitis              | Studies                | 23         | 0         |
|                            | Countries/subnationals | 68         | 0         |
|                            | Countries              | 17         | 0         |
|                            | GBD world regions      | 7          | 0         |
|                            | GBD super-regions      | 4          | 0         |
| Other fungal skin diseases | Studies                | 30         | 0         |
|                            | Countries/subnationals | 74         | 0         |
|                            | Countries              | 22         | 0         |
|                            | GBD world regions      | 11         | 0         |
|                            | GBD super-regions      | 6          | 0         |

In addition, data from US claims for 2000, 2010, and 2012 by US state were included for both tinea capitis and other fungal skin diseases. We also used hospital outpatient data for other fungal skin diseases but decided not to use it for tinea capitis because we decided it would not be representative of true prevalence, and variation between countries in the proportion of true prevalent cases captured in hospital inpatient and outpatient data would likely vary more than can be captured by a single crosswalk

in DisMod-MR 2.1. For tinea capitis, we compared the rates in the outpatient data from Norway, Sweden, Canada, and the USA and found implausibly large differences with the rates from the claims data.

### Severity splits

The basis of the GBD disability weight survey assessments are lay descriptions of sequelae highlighting major functional consequences and symptoms. The same disability weight was used for both tinea capitis and other fungal skin diseases.

**Table 2. Severity level and lay description**

| Severity level                          | Lay description                                                                         | DW (95% CI)         |
|-----------------------------------------|-----------------------------------------------------------------------------------------|---------------------|
| Infectious disease, acute episode, mild | The person has a low fever and mild discomfort but no difficulty with daily activities. | 0.006 (0.002–0.012) |

### Modelling strategy

DisMod-MR 2.1, a Bayesian meta-regression tool, was used to estimate tinea capitis and other fungal skin diseases prevalence by age, sex, year, and geography (subnational [select countries], country, region, super-region). Separate models were run for tinea capitis and other fungal skin diseases.

**Tinea capitis.** To help inform the distribution of tinea capitis across the lifespan, excess mortality was set at zero, remission was set at 0.5 to 4, and incidence was set to zero between 20 and 100 years. This was in agreement with the available prevalence data and expert advice. We made use of a relatively long time window of 20 years to determine which data points were used for a particular year of fit. This means that for the year 2000, for instance, DisMod-MR 2.1 incorporated all data points ranging from 1980 to present to estimate prevalence. Study-level covariates in the final model included adjustments for hospital outpatient data and US claims data for 2000 and 2010. In addition, we limited random effects for sub-Saharan Africa (-2,3) and Western Europe (-0.1, 1) to improve model estimates.

**Other fungal skin diseases.** The modelling strategy was similar to that for tinea capitis with remission set between 0.33 and 4. As Medical Expenditure Panel Survey (MEPS) data points were included in this model, we used a study-level covariate to adjust estimates derived from MEPS, outpatient data, and US claims data for 2000 and 2010 toward the level of prevalence observed in US claims data from 2012 and the literature. We also included a covariate to add uncertainty for data that did not arise from physical examination.

**Table 3. Study-level beta and exponentiated values**

| Cause                      | Study covariate                              | Parameter  | Beta                  | Exp(beta)          |
|----------------------------|----------------------------------------------|------------|-----------------------|--------------------|
| Tinea capitis              | Claims data - 2000                           | Prevalence | -0.13 (-0.18 - -0.08) | 0.88 (0.84 - 0.92) |
|                            | Claims data - 2010                           | Prevalence | -0.10 (-0.14 - -0.06) | 0.90 (0.87 - 0.94) |
| Other fungal skin diseases | MEPS                                         | Prevalence | -0.98 (-1.11 - -0.85) | 0.37 (0.33 - 0.43) |
|                            | Outpatient                                   | Prevalence | -0.99 (-1.99 - 0.00)  | 0.37 (0.14 - 1.00) |
|                            | Claims data - 2000                           | Prevalence | -0.20 (-0.23 - -0.18) | 0.81 (0.80 - 0.83) |
|                            | Claims data - 2010                           | Prevalence | -0.05 (-0.07 - -0.03) | 0.95 (0.94 - 0.97) |
|                            | Data was not based on physical examinations* | Prevalence | 1.45 (0.66 - 1.98)    | 4.28 (1.94 - 7.24) |

\* Covariate on the variance.



# Viral skin diseases

## Flowchart

### Viral Warts

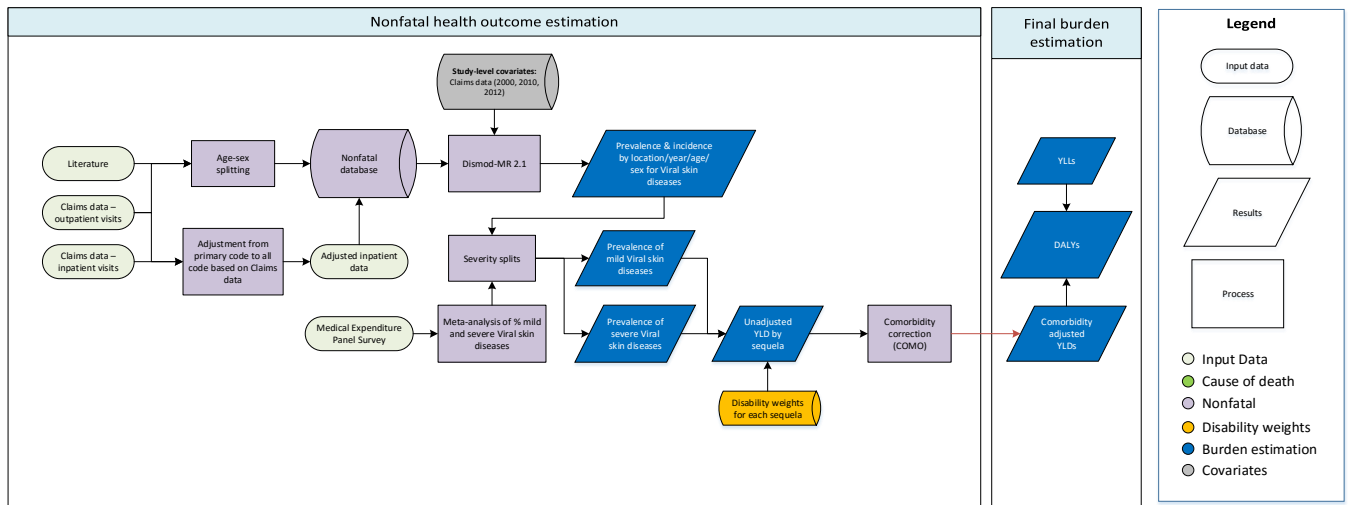

### Molluscum Contagiosum

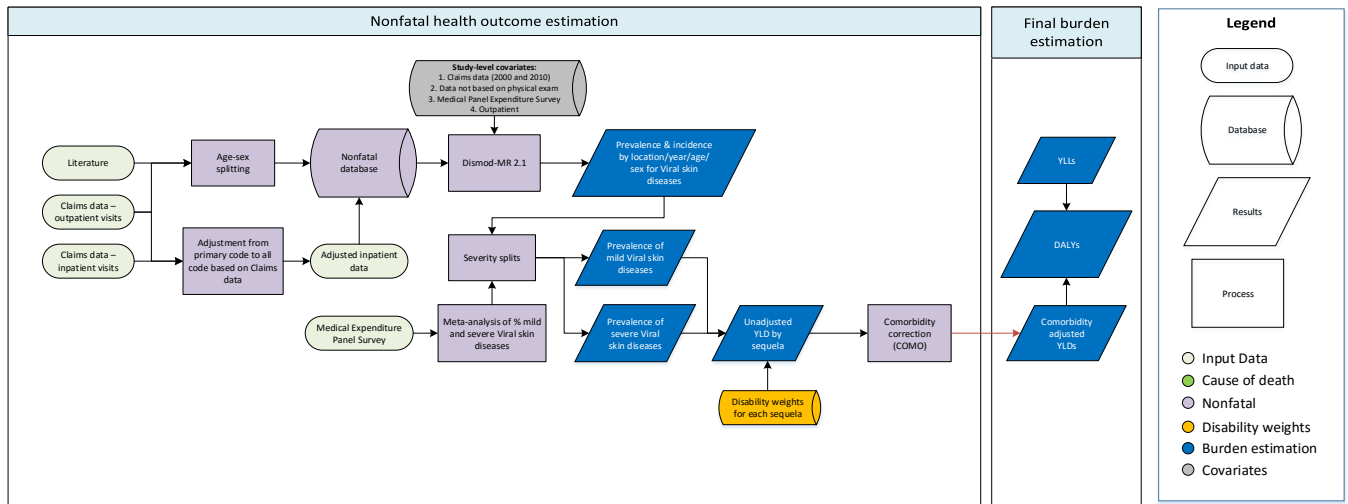

## Case definition

Viral skin diseases consist of viral warts and molluscum contagiosum. Viral warts are raised growths on the surface of the skin caused by an infection with the human papillomavirus (ICD-10: B07). Molluscum contagiosum is a viral infection of the skin or occasionally of the mucous membranes characterized by the appearance of waxy, dome-shaped nodules. It is caused by a DNA poxvirus called the molluscum contagiosum virus (ICD-10: B08.1) (1). In GBD 2016, we modelled viral warts and molluscum contagiosum

separately in order to better accommodate differences in burden between the subtypes of viral skin diseases.

## Input data

### *Model inputs*

In the GBD 2010 study, a systematic review of the literature was conducted using PubMed and Google Scholar, to capture epidemiological data for viral skin diseases. Due to lack of published data on the epidemiology of viral skin diseases, the literature search also included relevant incidence data from national inpatient or outpatient records in the USA. The inclusion criteria stipulated that studies (1) must be published between 1980 and 2012; (2) must provide data on the incidence or prevalence of viral warts or molluscum contagiosum; (3) must use samples representative of the general population (ie, samples derived from the experimental arm of clinical trials or based in dermatology clinics were excluded); (4) must use a sample size larger than 100; and (5) must provide sufficient information on study method and sample characteristics to assess the quality of the study. For GBD 2013, the GBD 2010 search strategy was replicated to capture epidemiological studies published between 2012 and 2014. Data were outliered or excluded if we found them unreasonable when compared to regional, super-regional, and global rates.

**Table 1. Input data**

| Cause                 |                        | Prevalence | Incidence |
|-----------------------|------------------------|------------|-----------|
| Viral warts           | Studies                | 24         | 1         |
|                       | Countries/subnationals | 71         | 1         |
|                       | Countries              | 20         | 1         |
|                       | GBD world regions      | 12         | 1         |
|                       | GBD super-regions      | 7          | 1         |
| Molluscum contagiosum | Studies                | 11         | 3         |
|                       | Countries/subnationals | 60         | 3         |
|                       | Countries              | 10         | 2         |
|                       | GBD world regions      | 6          | 1         |
|                       | GBD super-regions      | 4          | 1         |

Outpatient data and data from US claims for 2000, 2010, and 2012 by US state were included in GBD 2016, where appropriate. See descriptions of individual modelling approaches for more information.

### *Severity splits*

In GBD 2016, cases of both disorders were allocated a distribution between mild acute infectious disease and disfigurement level 2. The severity splits and disability weights used in GBD 2015 were also applied in GBD 2016.

**Table 2. Sequela and disability weight**

| Sequela | Severity level | Lay description | DW (95% CI) |
|---------|----------------|-----------------|-------------|
|---------|----------------|-----------------|-------------|

|                              |                                         |                                                                                                                                                                     |                     |
|------------------------------|-----------------------------------------|---------------------------------------------------------------------------------------------------------------------------------------------------------------------|---------------------|
| Mild viral warts             | Infectious disease, acute episode, mild | The person has a low fever and mild discomfort, but no difficulty with daily activities.                                                                            | 0.006 (0.002–0.012) |
| Severe viral warts           | Disfigurement, level 2                  | The person has a visible physical deformity that causes others to stare and comment. As a result, the person is worried and has trouble sleeping and concentrating. | 0.067 (0.044–0.096) |
| Mild molluscum contagiosum   | Infectious disease, acute episode, mild | The person has a low fever and mild discomfort but no difficulty with daily activities.                                                                             | 0.006 (0.002–0.012) |
| Severe molluscum contagiosum | Disfigurement, level 2                  | The person has a visible physical deformity that causes others to stare and comment. As a result, the person is worried and has trouble sleeping and concentrating. | 0.067 (0.044–0.096) |

### Modelling strategy

For GBD 2016, DisMod-MR 2.1 was used to estimate prevalence, by age, sex, year, and geography (subnational [select countries], country, region, super-region) for viral warts and molluscum contagiosum. Separate models were run for each disease, as illustrated throughout this cause write-up.

**Viral warts.** Viral warts were modelled with excess mortality set to 0 and remission set between 0.25 and 2, implying a duration of 0.5 to 4 years. This was in line with the levels of prevalence and incidence data, as well as expert opinion. A number of additional settings were used to ensure that DisMod-MR 2.1 sufficiently followed available data points. Incidence was restricted to a maximum of 0.1, and we made use of a relatively long time window of 25 years to determine which data points were used for a particular year of fit. We limited the prevalence random effects for Andean Latin America (-0.2, 0.2) in order to improve model fit. Study-level covariates were used to adjust US claims data for 2000, 2010, and 2012 toward other data points.

**Molluscum contagiosum.** As available data only contained information on prevalence and incidence, we specified additional expert priors to further inform analyses. Molluscum contagiosum was modelled with excess mortality set to 0 and remission set between 0.5 and 2, implying a duration of 0.5 to 2 years. This

was in line with the available epidemiological data, expert opinion, and previous GBD work. We used a time window of 25 years to determine which data points to include for a particular year of fit. Due to data heterogeneity, we restricted the location random effects to between -0.5 and 0.5 for the Netherlands and select GBD regions and super-regions (Southern Latin America, sub-Saharan Africa, high-income, South Asia, and Southeast Asia, East Asia, and Oceania). Study-level covariates were used to adjust data not based on examination, MEPS, outpatient, and US claims data for 2000 and 2010 toward other data points.

**Table 3. Study-level beta and exponentiated values**

|                       | Covariate          | Parameter  | Beta                  | Exp(beta)          |
|-----------------------|--------------------|------------|-----------------------|--------------------|
| Viral warts           | Claims data - 2000 | Prevalence | -0.31 (-0.34 — -0.26) | 0.73 (0.71 — 0.77) |
|                       | Claims data - 2010 | Prevalence | -0.19 (-0.22 — -0.14) | 0.83 (0.80 — 0.87) |
|                       | Claims data - 2012 | Prevalence | -0.16 (-0.19 — -0.11) | 0.85 (0.83 — 0.89) |
| Molluscum contagiosum | Claims data - 2000 | Prevalence | -1.78 (-1.96 - -1.52) | 0.17 (0.14 - 0.22) |
|                       | Claims data - 2010 | Prevalence | -1.20 (-1.38 - -0.96) | 0.30 (0.25 - 0.38) |
|                       | Claims data - 2012 | Prevalence | -1.06 (-1.23 - -0.82) | 0.35 (0.29 - 0.44) |

# Acne Vulgaris

## Flowchart

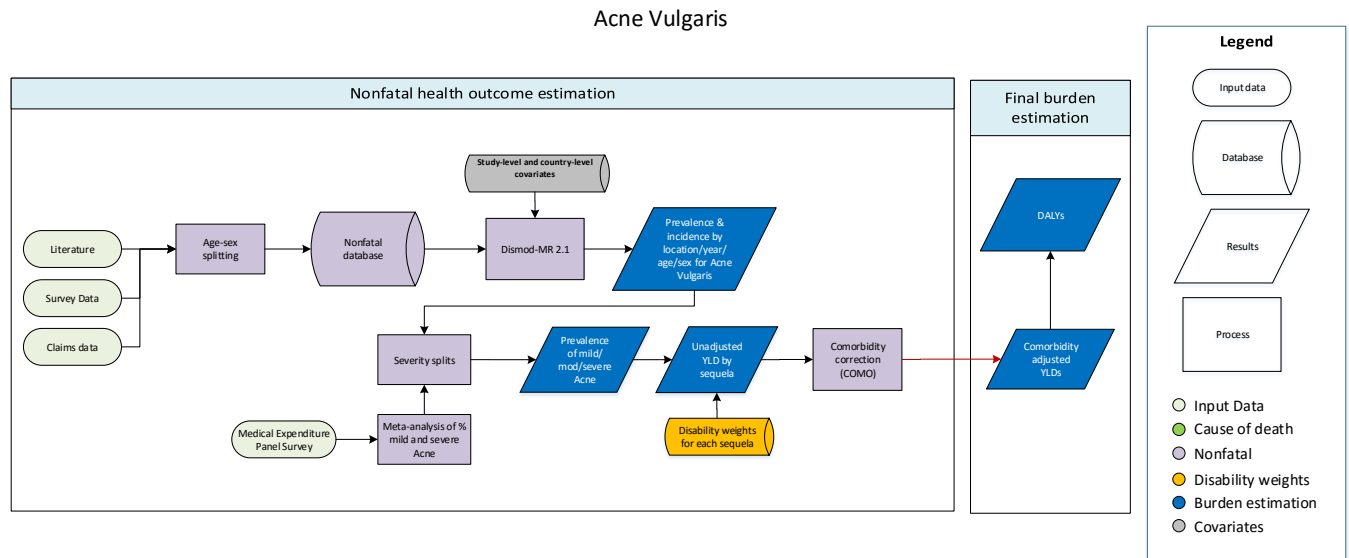

## Case definition

Acne vulgaris was included in the GBD 2016 cause group of skin and subcutaneous conditions. Acne vulgaris (or acne) is a chronic inflammatory disease of the pilosebaceous unit associated with an increase in sebum secretion. Included in the GBD 2016 modelling were cases meeting ICD-10 diagnostic criteria for acne vulgaris (ICD-10: I70\*\*).

## Input data

### Model inputs

In the GBD 2010 study, a systematic review of the literature was conducted using PubMed and Google Scholar to capture epidemiological data for acne vulgaris. The inclusion criteria stipulated that studies (1) must be published between 1980 and 2012; (2) must provide data on the incidence or prevalence of acne vulgaris; (3) must use samples representative of the general population (ie, samples derived from the experimental arm of clinical trials or based in dermatology clinics were excluded); (4) must use a sample size larger than 100; and (5) must provide sufficient information on study method and sample characteristics to assess the quality of the study. The agreed-upon approach for acne vulgaris was to undertake a literature review every two years. For GBD 2016, the GBD 2010 search strategy was replicated in PubMed to capture epidemiological studies published between 2013 and 2016. Additionally, US claims data from 2000, 2010, and 2012 were included.

**Table 1. Input data**

|                        | Prevalence |
|------------------------|------------|
| Studies                | 59         |
| Countries              | 33         |
| Countries/subnationals | 86         |
| GBD world regions      | 7          |

*Severity splits*

The table below illustrates the severity level, lay description, and disability weight for acne. In GBD 2016, we added two additional severity levels – disfigurement 2 and disfigurement 3. The disability weight of each severity of acne was applied across forty percent of the total prevalence cases to account for biases in outpatient utilization. The remaining sixty percent of prevalence cases were considered mild cases (disfigurement level 1). These proportions were generated using the ratio of patients seeking care captured from claims data, to all individuals from captured in literature surveying the general population.

**Table 2. Severity level and lay description**

| Sequela                | Severity level         | Lay description                                                                                                                                                                         | DW (95% CI)         |
|------------------------|------------------------|-----------------------------------------------------------------------------------------------------------------------------------------------------------------------------------------|---------------------|
| Mild acne vulgaris     | Disfigurement, level 1 | The individual has a slight, visible physical deformity that others notice, which causes some worry and discomfort.                                                                     | 0.011 (0.005–0.021) |
| Moderate acne vulgaris | Disfigurement, level 2 | The individual has a visible physical deformity that causes others to stare and comment. As a result, the person is worried and has trouble sleeping and concentrating.                 | 0.067 (0.044–0.096) |
| Severe acne vulgaris   | Disfigurement, level 3 | The individual has an obvious physical deformity that makes others uncomfortable, which causes the person to avoid social contact, feel worried, sleep poorly, and think about suicide. | 0.405 (0.275–0.546) |

**Modelling strategy**

DisMod-MR 2.1 was used to estimate prevalence by age, sex, year, and country for acne vulgaris.

Since our available data only contained information on prevalence, we specified additional expert priors to further inform analyses. We assumed zero excess mortality and remission from 0.38 to 0.6, implying a duration of approximately two to three years. This was in line with the available epidemiological data, expert opinion, and previous GBD work. A value prior of zero was set for incidence between the ages of 0 and 6, and 61 and 100. We used a time window of five years to determine which data points were used for a particular year of fit.

Study-level covariates were used to adjust prevalence from US claims data for 2000, 2010, and 2012 toward the level of other prevalence data points, which were more representative of the general population. A study-level covariate was applied to data that were not based on physical examinations.

Furthermore, since the data were extremely heterogeneous, the random effects were constrained to (-0.3, 0.3) for regions such as East Asia. In addition, sociodemographic status and sugar consumption were used as country-level covariates to guide estimates for countries with few or no data.

The table below indicates the study covariates, parameters, beta, and exponentiated beta values used in GBD 2016.

**Table 3. Beta and exponentiated values**

| <b>Covariate type</b> | <b>Covariate</b>                            | <b>Parameter</b> | <b>beta</b>           | <b>Exponentiated beta</b> |
|-----------------------|---------------------------------------------|------------------|-----------------------|---------------------------|
| Study-level covariate | Data was not based on physical examinations | Prevalence       | 0.23 (-0.24 - 0.68)   | 1.26 (0.79 - 1.97)        |
| Study-level covariate | Claims data – 2000                          | Prevalence       | -1.83 (-1.99 - -1.62) | 0.16 (0.14 - 0.20)        |
| Study-level covariate | Claims data – 2010                          | Prevalence       | -1.69 (-1.85 - -1.49) | 0.18 (0.16 - 0.23)        |
| Study-level covariate | Claims data – 2012                          | Prevalence       | -1.63 (-1.80 - -1.43) | 0.20 (0.17 - 0.24)        |
| Country covariate     | Socio-demographic Index                     | Prevalence       | 0.95 (0.84 - 1.00)    | 2.60 (2.32 - 2.72)        |
| Country covariate     | sugar adjusted(g)                           | Prevalence       | 0.00 (-0.00 - 0.00)   | 1.00 (1.00 - 1.00)        |

# Alopecia Areata

## Flowchart

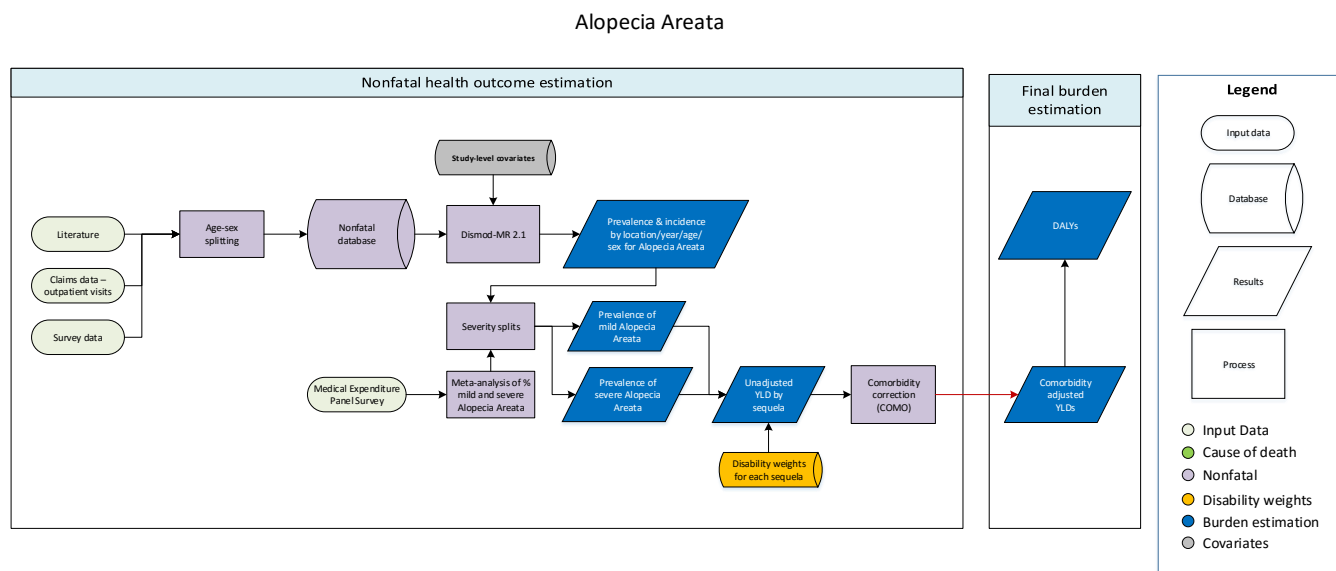

## Case definition

Alopecia areata was included in the GBD 2016 cause group of skin and subcutaneous conditions. Alopecia areata is an autoimmune disease that results in hair loss on the scalp and other parts of the body. Included in the GBD disease modelling were cases meeting ICD-10 diagnostic criteria for alopecia (ICD-10: L63).

## Input data

### Model inputs

In the GBD 2016 study, a systematic review of the literature was conducted using PubMed to expand the GBD dataset (1980–2014) with new epidemiological data for Alopecia areata between 2014 and 2016. The inclusion criteria stipulated that studies (1) must provide data on the incidence or prevalence of alopecia areata; (2) must use samples representative of the general population (ie, samples derived from the experimental arm of clinical trials or based in dermatology clinics were excluded); (3) must use a sample size larger than 100; and (4) must provide sufficient information on study method and sample characteristics to assess the quality of the study. The agreed-upon approach for alopecia areata was to undertake a literature review every two years. Additionally, US claims data from 2000, 2010, and 2012 were included.

**Table 1. Model inputs**

|           | Prevalence | Incidence |
|-----------|------------|-----------|
| Studies   | 18         | 1         |
| Countries | 14         | 1         |



|                        |    |   |
|------------------------|----|---|
| Countries/subnationals | 64 | 1 |
| GBD world regions      | 6  | 1 |

### Severity splits & disability weights

The table below illustrates the sequela, severity level, lay description, and disability weights associated with Alopecia areata.

**Table 2. Severity level and lay description**

| Sequela                | Severity level         | Lay description                                                                                                                                                         | DW (95% CI)         |
|------------------------|------------------------|-------------------------------------------------------------------------------------------------------------------------------------------------------------------------|---------------------|
| Mild alopecia areata   | Disfigurement, level 1 | The individual has a slight, visible physical deformity that others notice, which causes some worry and discomfort.                                                     | 0.011 (0.005–0.021) |
| Severe alopecia areata | Disfigurement, level 2 | The individual has a visible physical deformity that causes others to stare and comment. As a result, the person is worried and has trouble sleeping and concentrating. | 0.067 (0.044–0.096) |

### Modelling strategy

DisMod-MR 2.1 was used to estimate prevalence by age, sex, year, and country for alopecia areata. We assumed zero excess mortality and remission priors implying a minimum duration of seven months. This was in line with the available epidemiological data, expert opinion, and previous GBD work. We used a time window of 20 years to determine which data points were used for a particular year of fit.

Study-level covariates were used to adjust prevalence derived from US claims data for 2000 and 2010 toward the level of other prevalence data, which were more representative of the general population. To improve estimation across all regions, the minimum global coefficient of variation was set at 0.1. In addition, significant sex differences were observed in the US claims data, resulting in a higher prevalence in females compared to males, likely due to more females seeking health consultations for alopecia areata compared to males. To minimize this effect, we set the sex covariate to zero, but this had minimal impact on the global estimates.

**Table 3. Beta and exponentiated values**

| Covariate type        | Covariate          | Parameter  | beta                  | Exponentiated beta |
|-----------------------|--------------------|------------|-----------------------|--------------------|
| Study-level covariate | Claims data - 2000 | Prevalence | -0.69 (-0.74 - -0.64) | 0.50 (0.48 - 0.53) |

|                       |                    |            |                       |                    |
|-----------------------|--------------------|------------|-----------------------|--------------------|
| Study-level covariate | Claims data - 2010 | Prevalence | -0.07 (-0.11 - -0.02) | 0.93 (0.89 - 0.98) |
|-----------------------|--------------------|------------|-----------------------|--------------------|

# Pruritus

## Flowchart

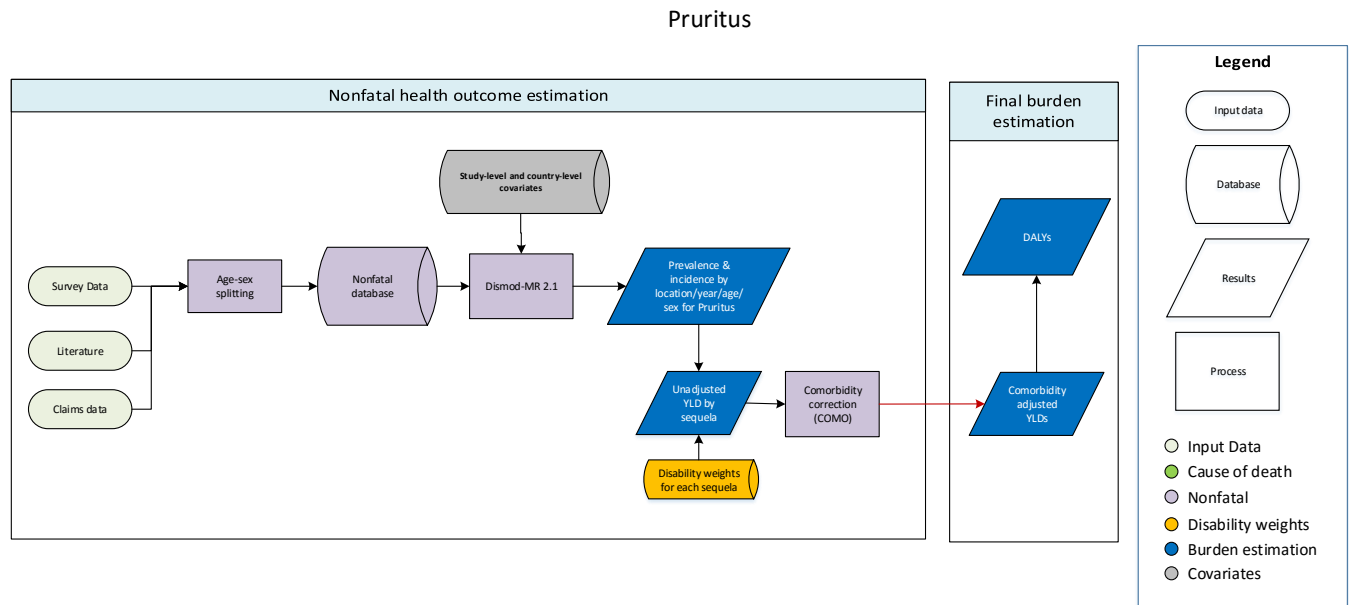

## Case definition

Pruritus was included in the GBD 2016 cause group of skin and subcutaneous conditions. Pruritus (or itching) can be a symptom of a condition or disease. Included in the GBD disease modelling were cases meeting ICD-10 diagnostic criteria for pruritus (ICD-10: L29).

## Input data

### Model inputs

In the GBD 2010 study, a systematic review of the literature was conducted using PubMed and Google Scholar to capture epidemiological data for pruritus. The inclusion criteria stipulated that studies (1) must be published between 1980 and 2012; (2) must provide data on the incidence or prevalence of pruritus; (3) must use samples representative of the general population (ie, samples derived from the experimental arm of clinical trials or based in dermatology clinics were excluded); (4) must use a sample size larger than 100; and (5) must provide sufficient information on study method and sample characteristics to assess the quality of the study. The agreed-upon approach for pruritus was to undertake a literature review every two years. For GBD 2016, the GBD 2010 search strategy was replicated in PubMed to capture epidemiological studies published between 2013 and 2016. Additionally, US claims data from 2000, 2010, and 2012 were included.

**Table 1. Data inputs**

|          |                        | Prevalence |
|----------|------------------------|------------|
| Pruritus | Studies                | 5          |
|          | Countries              | 5          |
|          | Countries/subnationals | 56         |
|          | GBD world regions      | 2          |

*Severity splits*

The table below illustrates the severity level, lay description, and disability weight for pruritus.

**Table 2. Severity level and lay description**

| Sequela  | Severity level         | Lay description                                                                                                     | DW (95% CI)         |
|----------|------------------------|---------------------------------------------------------------------------------------------------------------------|---------------------|
| Pruritus | Disfigurement, level 1 | The individual has a slight, visible physical deformity that others notice, which causes some worry and discomfort. | 0.011 (0.005–0.021) |

**Modelling strategy**

DisMod-MR 2.1 was used to estimate prevalence by age, sex, year, and country for pruritus.

Per expert advice, remission was set from 0.2 to 1, implying a duration of three months to one years. We used a time window of 25 years to determine which data points were used for a particular year of fit.

Study-level covariates were used to adjust prevalence derived from self-reported literature, MEPS, and US claims data for 2000 and 2010 toward the level of US claims data 2012, which were more representative of the general population.

The data were extremely heterogeneous. Therefore, the random effects were constrained to (-0.2, 0.2) and lagged distributed income was used as a country-level covariate to guide estimates for countries with few or no data.

**Table 3. Beta and exponentiated values**

| Covariate type        | Covariate          | Parameter  | beta                  | Exponentiated beta |
|-----------------------|--------------------|------------|-----------------------|--------------------|
| Study-level covariate | MEPS               | Prevalence | -1.33 (-1.65 - -1.07) | 0.26 (0.19 - 0.34) |
| Study-level covariate | Self-reported      | Prevalence | 1.61 (0.95 - 1.99)    | 5.02 (2.59 - 7.32) |
| Study-level covariate | Claims data – 2000 | Prevalence | -0.74 (-0.78 - -0.71) | 0.48 (0.46 - 0.49) |

|                       |                      |            |                       |                    |
|-----------------------|----------------------|------------|-----------------------|--------------------|
| Study-level covariate | Claims data – 2010   | Prevalence | -0.16 (-0.18 - -0.14) | 0.85 (0.84 - 0.87) |
| Country covariate     | LDI (I\$ per capita) | Prevalence | 0.06 (-0.11 - 0.19)   | 1.06 (0.90 - 1.21) |

# Urticaria

## Flowchart

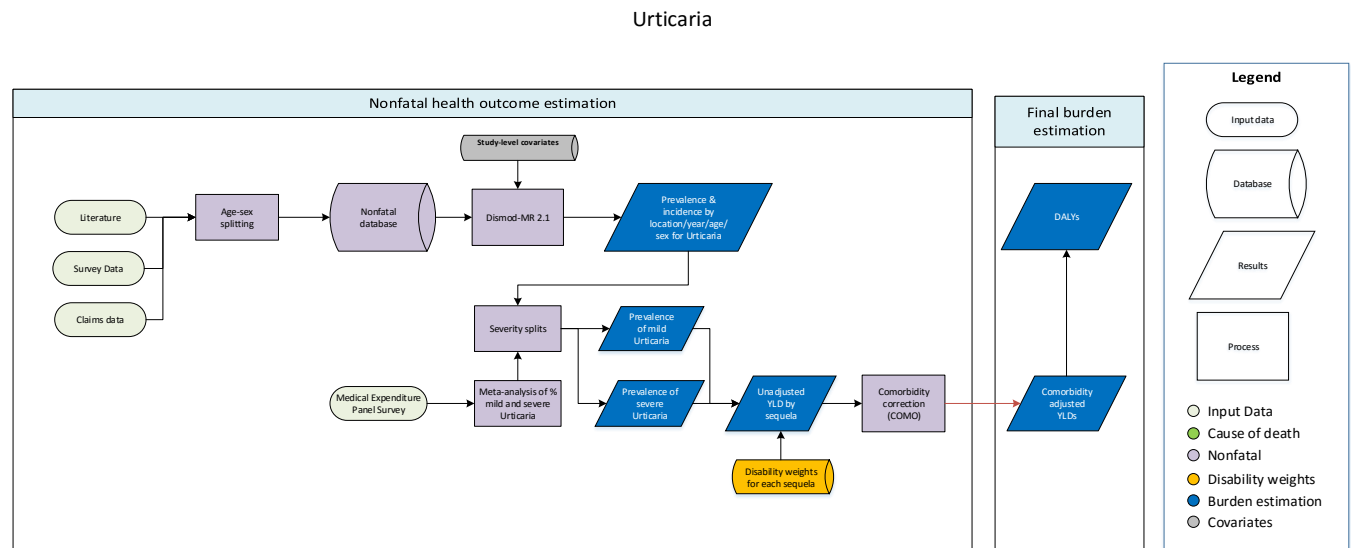

## Case definition

Urticaria was included in the GBD 2016 cause group of skin and subcutaneous conditions. Urticaria (hives) refers to a skin reaction that causes itchy, raised bumps. Included in the GBD disease modelling were cases meeting ICD-10 diagnostic criteria for urticaria (ICD-10: L50).

## Input data

### Model inputs

In the GBD 2010 study, a systematic review of the literature was conducted using PubMed and Google Scholar to capture epidemiological data for urticaria. The inclusion criteria stipulated that studies (1) must be published between 1980 and 2012; (2) must provide data on the incidence or prevalence of urticaria; (3) must use samples representative of the general population (ie, samples derived from the experimental arm of clinical trials or based in dermatology clinics were excluded); (4) must use a sample size larger than 100; and (5) must provide sufficient information on study method and sample characteristics to assess the quality of the study.

The agreed-upon approach for urticaria was to undertake a literature review every two years. For GBD 2016, the GBD 2010 search strategy was replicated to capture epidemiological studies published between the previous 2013 and 2016. Additionally, US claims data from 2000, 2010, and 2012 were included in the data used for GBD 2016.

The table below illustrates the data inputs used in GBD 2016 by number of studies, geographic location, and prevalence/incidence.

**Table 1. Data inputs**

|                        | Prevalence |
|------------------------|------------|
| Studies                | 22         |
| Countries              | 21         |
| Countries/subnationals | 72         |
| GBD world regions      | 6          |

*Severity splits & disability weights*

The table below illustrates the severity level, lay description, and disability weight for urticaria.

**Table 2. Severity level and lay descriptions**

| Sequela          | Severity level                         | Lay description                                                                                                                                                                          | DW (95% CI)         |
|------------------|----------------------------------------|------------------------------------------------------------------------------------------------------------------------------------------------------------------------------------------|---------------------|
| Mild urticaria   | Disfigurement, level 1 with itch/pain  | The person has a slight, visible physical deformity that is sometimes sore or itchy. Others notice the deformity, which causes some worry and discomfort.                                | 0.027 (0.015–0.042) |
| Severe urticaria | Disfigurement, level 2, with itch/pain | The person has a visible physical deformity that is sore and itchy. Other people stare and comment, which causes the person to worry. The person has trouble sleeping and concentrating. | 0.188 (0.124–0.267) |

**Modelling strategy**

DisMod-MR 2.1 was used to estimate prevalence by age, sex, year, and country for urticaria.

The available data were mainly composed of prevalence estimates with a few incidence data points. For GBD 2016, we made both prevalence and incidence estimates. We used a time window set to 25 years. We set excess mortality to zero and remission between 0.5 to 2, implying a duration between ½ and 2 years. In addition, location random effects were constrained to (-0.3, 0.3). US claims data from year 2000 and 2010 were adjusted towards the most complete US 2012 set. Specific data points were outliered if they were overestimates or underestimates in comparison to country, regional and global patterns.

The table below illustrates the covariate used in the modelling process, as well as associated parameters, beta, and exponentiated beta (confidence interval) values for GBD 2016.

**Table 3. Study covariate**

| <b>Covariate type</b> | <b>Covariate</b>   | <b>Parameter</b> | <b>beta</b>           | <b>Exponentiated beta</b> |
|-----------------------|--------------------|------------------|-----------------------|---------------------------|
| Study-level covariate | Claims data - 2000 | Prevalence       | -0.23 (-0.25 - -0.22) | 0.79 (0.78 - 0.80)        |
| Study-level covariate | Claims data - 2010 | Prevalence       | -0.06 (-0.08 - -0.05) | 0.94 (0.92 - 0.95)        |



# Decubitus Ulcer

## Flowchart

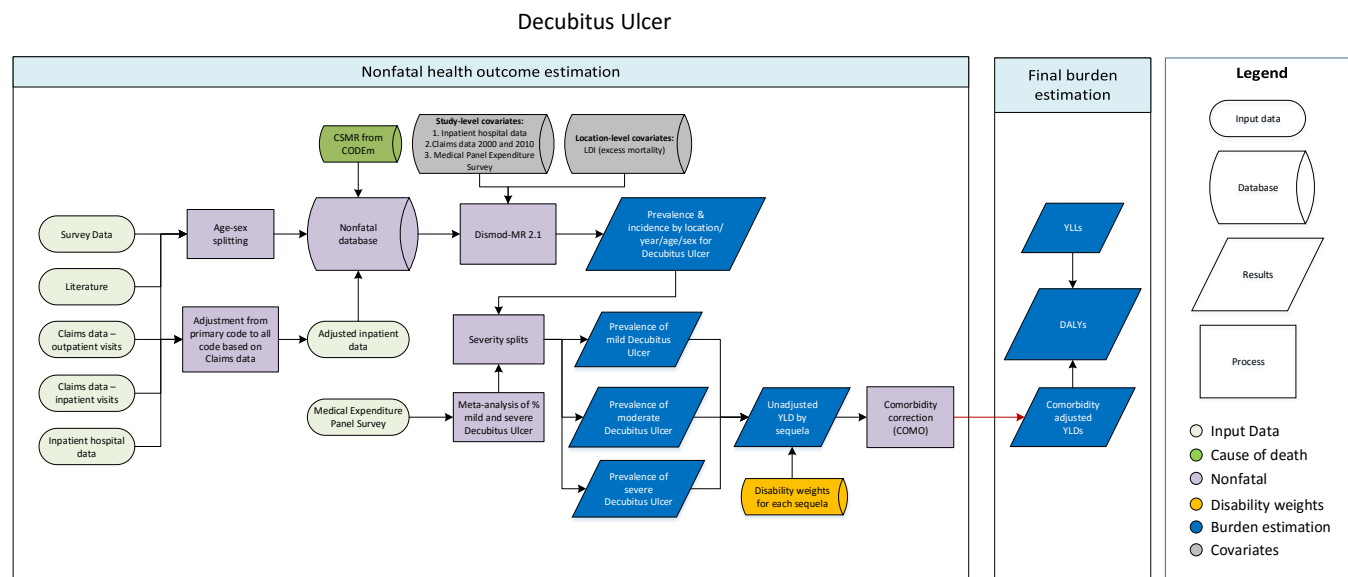

## Case definition

Decubitus ulcer was included in the GBD 2016 cause group of skin and subcutaneous conditions.

Decubitus ulcer, also known as pressure ulcer/sore, is an injury to the skin and underlying tissue resulting from an obstruction of blood flow due to pressure on the skin. Included in the GBD modelling were cases meeting ICD-10 criteria for decubitus ulcer (ICD-10: L89) (1).

## Input data

### *Model inputs*

In the GBD 2010 study, a systematic review of the literature was conducted using PubMed and Google Scholar to capture epidemiological data for decubitus ulcer. The inclusion criteria stipulated that studies (1) must be published between 1980 and 2012; (2) must provide data on the incidence or prevalence of decubitus ulcer; (3) must use samples representative of the general population (ie, samples derived from the experimental arm of clinical trials or based in dermatology clinics were excluded); (4) must use a sample size larger than 100; and (5) must provide sufficient information on study method and sample characteristics to assess the quality of the study. The data from literature were sparse but contained both prevalence and incidence estimates. For GBD 2013, the GBD 2010 search strategy was replicated to capture epidemiological studies published between 2012 and 2014. The available data were from high-income countries. Hospital inpatient and US claims data from 2000, 2010, and 2012 were also used for GBD 2016. The final dataset also included cause-specific mortality rates for decubitus ulcer estimated by

CODEm. Data were outliered or excluded if we found them unreasonable when compared to regional, super-regional, and global rates.

**Table 1. Data inputs (not including hospital inpatient data)**

|                        | Prevalence | Incidence |
|------------------------|------------|-----------|
| Studies                | 0          | 2         |
| Countries/subnationals | 0          | 308       |
| Countries              | 0          | 34        |
| GBD world regions      | 0          | 15        |
| GBD super-regions      | 0          | 6         |

*Severity splits*

For GBD 2016, decubitus ulcer was assigned the disability weight, disfigurement with itch/pain, levels 1, 2, and 3. The disability weights used for GBD 2015 were based on disfigurement only.

**Table 2. Severity level and lay descriptions**

| Sequela                  | Severity level                         | Lay description                                                                                                                                                                                                                       | DW (95% CI)         |
|--------------------------|----------------------------------------|---------------------------------------------------------------------------------------------------------------------------------------------------------------------------------------------------------------------------------------|---------------------|
| Mild decubitus ulcer     | Disfigurement, level 1 with itch/pain  | The person has a slight, visible physical deformity that is sometimes sore or itchy. Others notice the deformity, which causes some worry and discomfort.                                                                             | 0.027 (0.015–0.042) |
| Moderate decubitus ulcer | Disfigurement, level 2, with itch/pain | The person has a visible physical deformity that is sore and itchy. Other people stare and comment, which causes the person to worry. The person has trouble sleeping and concentrating.                                              | 0.188 (0.124–0.267) |
| Severe decubitus ulcer   | Disfigurement, level 3, with itch/pain | The person has an obvious physical deformity that is very painful and itchy. The physical deformity makes others uncomfortable, which causes the person to avoid social contact, feel worried, sleep poorly, and think about suicide. | 0.576 (0.401–0.731) |

## Modelling strategy

DisMod-MR 2.1 was used to estimate prevalence by age, sex, year, and geography (subnational [select countries], country, region, super-region) for decubitus ulcer. Per expert advice, remission was set from 3 to 4, implying a duration of three to four months. This was based on the assumption that remission does not change with treatment. These values were also in line with the available epidemiological data, expert opinion, and previous GBD work. The decubitus ulcer dataset was sufficiently large to make use of a relatively short time window of five years to determine which data points were used for a particular year of fit.

Study-level covariates were used to adjust incidence derived from hospital inpatient data, MEPS, and US claims data for 2000 and 2010 toward the level of other incidence data points, which were more representative of the general population. We excluded estimates less than  $10E-6$ . Log-transformed lagged distributed income (LDI) was used as a location-level covariate on excess mortality to guide estimates for countries with few or no data.

**Table 3. Beta and exponentiated values**

| Study covariate    | Parameter | Beta                  | Exp(beta)          |
|--------------------|-----------|-----------------------|--------------------|
| Hospital Inpatient | Incidence | -0.00 (-0.00 - -0.00) | 1.00 (1.00 - 1.00) |
| MEPS               | Incidence | -0.08 (-1.12 - 0.85)  | 0.93 (0.33 - 2.35) |
| Claims data - 2000 | Incidence | -0.52 (-0.56 - -0.47) | 0.60 (0.57 - 0.62) |
| Claims data - 2010 | Incidence | -0.30 (-0.34 - -0.26) | 0.74 (0.71 - 0.77) |

**Table 4. Location-level beta and exponentiated values**

| Country-level covariate | Parameter             | Beta                  | Exp(beta)          |
|-------------------------|-----------------------|-----------------------|--------------------|
| LDI (log-transformed)   | Excess mortality rate | -0.50 (-0.50 — -0.49) | 0.61 (0.61 — 0.61) |

## Other skin and subcutaneous diseases

### Flowchart

#### Other Skin and Subcutaneous Diseases (OSSD)

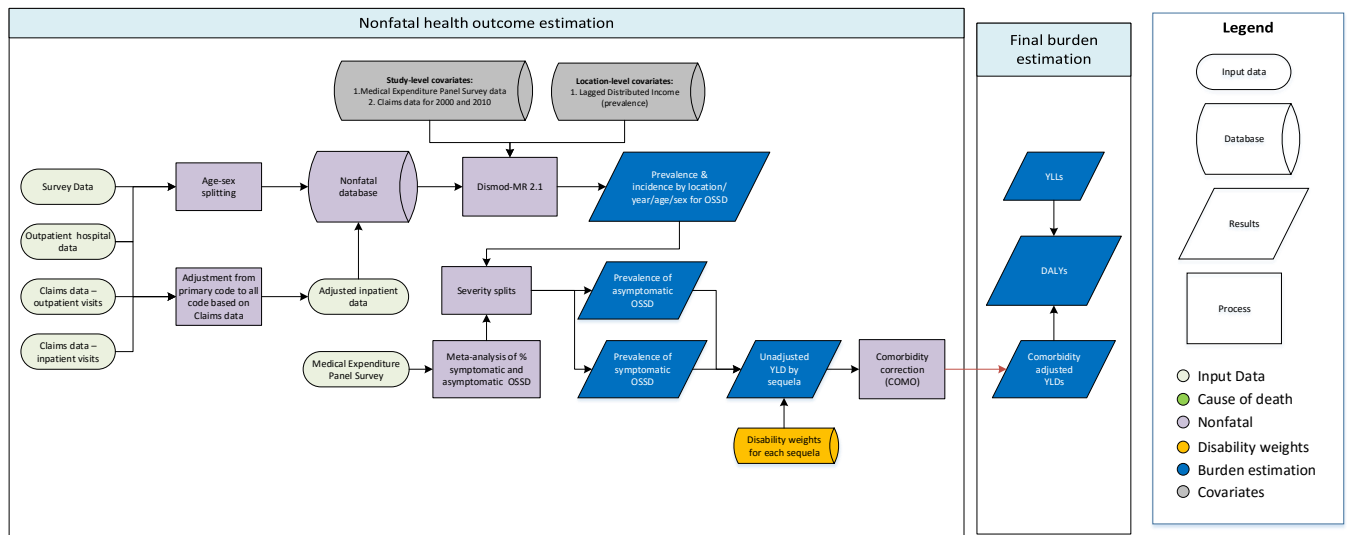

### Case definition

The other skin and subcutaneous diseases category encompassed a large group of skin conditions not captured in the other skin categories. We included cases meeting the following ICD-10 diagnostic criteria: other viral infections characterized by skin and mucous membrane lesions, not elsewhere classified (B08), unspecified viral infection characterized by skin and mucous membrane lesions (B09), pediculosis and phthiriasis (B85), myiasis (B87), other infestations (B88), sarcoidosis of skin (D86.3), porphyria cutanea tarda (E80.1), other and unspecified porphyria (E80.2), pemphigus (L10), other acantholytic disorders (L11), pemphigoid (L12), other bullous disorders (L13), bullous disorders in diseases classified elsewhere (L14), lichen simplex chronicus and prurigo (L28), pityriasis rosea (L42), lichen planus (L43), other papulosquamous disorders (L44), papulosquamous disorders in diseases classified elsewhere (L45), exfoliation due to erythematous conditions according to extent of body surface involved (L49), erythema multiforme (L51), erythema nodosum (L52), other erythematous conditions (L53), erythema in diseases classified elsewhere (L54), other acute skin changes due to ultraviolet radiation (L56), skin changes due to chronic exposure to nonionizing radiation (L57), other disorders of skin and subcutaneous tissue related to radiation (L59), nail disorders (L60), nail disorders in diseases classified elsewhere (L62), androgenic alopecia (L64), other nonscarring hair loss (L65), cicatricial alopecia [scarring hair loss] (L66), hair color and hair shaft abnormalities (L67), hypertrichosis (L68), rosacea (L71), follicular cysts of skin and subcutaneous tissue (L72), other follicular disorders (L73), eccrine sweat disorders (L74), apocrine sweat disorders (L75), vitiligo (L80), other disorders of pigmentation (L81), seborrheic keratosis (L82), acanthosis

nigricans (L83), corns and callosities (L84), other epidermal thickening (L85), keratoderma in diseases classified elsewhere (L86), transepidermal elimination disorders (L87), atrophic disorders of skin (L90), hypertrophic disorders of skin (L91), granulomatous disorders of skin and subcutaneous tissue (L92), other localized connective tissue disorders (L94), vasculitis limited to skin, not elsewhere classified (L95), and other disorders of skin and subcutaneous tissue in diseases classified elsewhere (L99).

## Input data

### *Model inputs*

In the GBD 2010 study, a systematic review of the literature was conducted using PubMed and Google Scholar to capture epidemiological data for skin diseases not captured in the other skin categories. The inclusion criteria stipulated that studies (1) must be published between 1980 and 2012; (2) must provide data on the incidence or prevalence; (3) must use samples representative of the general population (ie, samples derived from the experimental arm of clinical trials or based in dermatology clinics were excluded); (4) must use a sample size larger than 100; and (5) must provide sufficient information on study method and sample characteristics to assess the quality of the study. For GBD 2013, the GBD 2010 search strategy was replicated to capture epidemiological studies published between 2012 and 2014. Hospital outpatient data and data from US claims for 2000, 2010, and 2012 by US state were included in GBD 2016. Data were outliered or excluded if we found them unreasonable when compared to regional, super-regional, and global rates.

**Table 1. Data inputs (not including hospital inpatient data)**

|                        | Prevalence |
|------------------------|------------|
| Studies                | 1          |
| Countries/subnationals | 52         |
| Countries              | 1          |
| GBD world regions      | 1          |
| GBD super-regions      | 1          |

### *Severity split & disability weight*

Skin and other subcutaneous diseases were assigned the disability weight for disfigurement level 1.

**Table 2. Severity level and lay description**

| Sequela                                          | Severity level         | Lay description                                                                                                 | DW (95% CI)         |
|--------------------------------------------------|------------------------|-----------------------------------------------------------------------------------------------------------------|---------------------|
| Symptomatic other skin and subcutaneous diseases | Disfigurement, level 1 | The person has a slight, visible physical deformity that others notice, which causes some worry and discomfort. | 0.011 (0.005–0.021) |

## Modelling strategy

DisMod-MR 2.1, a Bayesian meta-regression tool, was used to estimate prevalence by age, sex, year, and geography (subnational [select countries], country, region, super-region) for skin and other subcutaneous diseases.

We assumed remission of one, implying a duration of 12 months. Similar to GBD 2015, we used a time window of 25 years to determine which data points were used for a particular year of fit.

Study-level covariates, which were used to adjust prevalence, were derived from the Medical Expenditure Panel Survey (MEPS) and US claims data for 2000 and 2010 toward the level of other prevalence data, which were more representative of the general population. In addition, log-transformed lagged distributed income was used as a location-level covariate to guide estimates for countries with few or no data.

**Table 3. Study-level beta and exponentiated values**

| Covariate          | Parameter  | Beta                  | Exp(beta)          |
|--------------------|------------|-----------------------|--------------------|
| Claims data – 2000 | Prevalence | -0.28 (-0.29 — -0.27) | 0.76 (0.75 — 0.77) |
| Claims data – 2000 | Prevalence | -0.06 (-0.07 — -0.05) | 0.94 (0.93 — 0.95) |
| MEPS               | Prevalence | -0.64 (-0.73 — -0.54) | 0.53 (0.48 — 0.58) |

**Table 4. Location-level beta and exponentiated values**

| Covariate             | Parameter  | Beta               | Exp(beta)          |
|-----------------------|------------|--------------------|--------------------|
| LDI (log-transformed) | Prevalence | 0.28 (0.27 — 0.30) | 1.33 (1.31 — 1.35) |

# Other sense organ diseases

## Flowchart

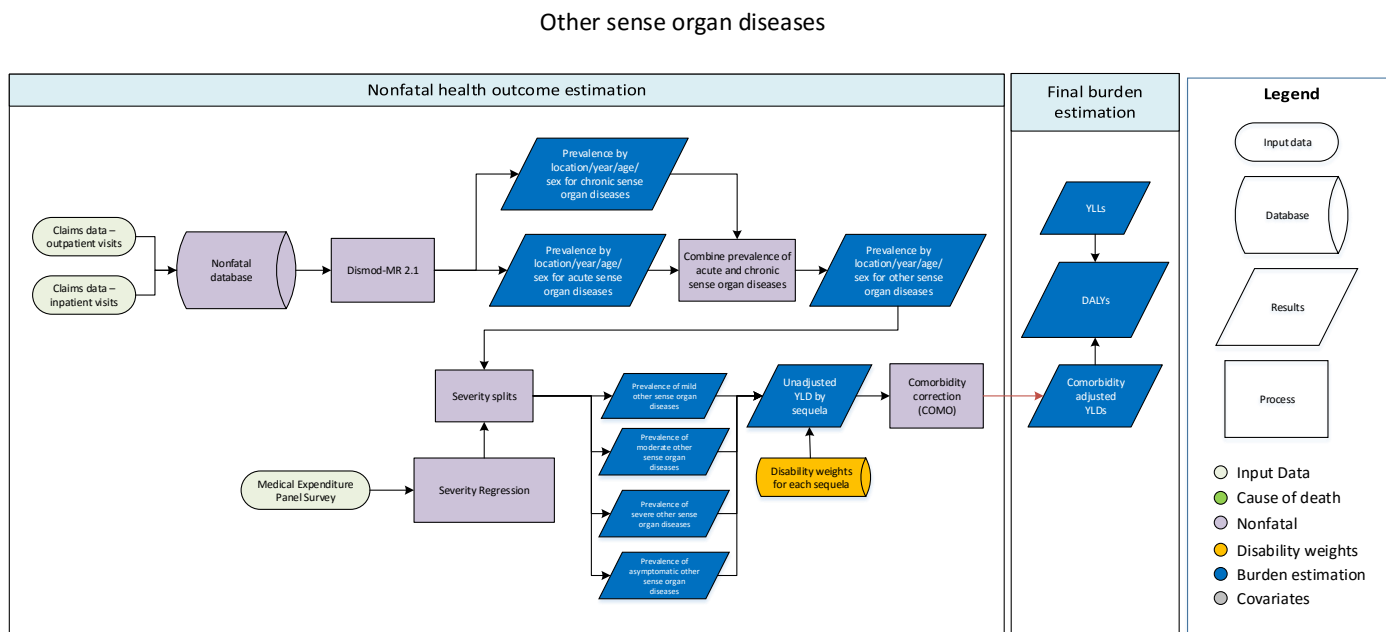

## Case definition

Other sense organ disease is a residual cause capturing both acute and chronic conditions that do not map to other causes, but lead to non-trivial morbidity. These include the following ICD codes: 077, 360, 364, 370-77, 379, 380, 386, and 388, which encompass a plethora of eye and ear disorders and conditions.

|        |                                                                                                                                                                                                                                            |
|--------|--------------------------------------------------------------------------------------------------------------------------------------------------------------------------------------------------------------------------------------------|
| 077    | Other diseases of conjunctiva due to viruses and chlamydiae                                                                                                                                                                                |
| 360    | Disorders of the globe                                                                                                                                                                                                                     |
| 364    | Disorders of iris and ciliary body                                                                                                                                                                                                         |
| 370-77 | Keratits, Corneal opacity and other disorders of cornea, Disorders of conjunctiva, Inflammation of eyelids, Other disorders of eyelids, Disorders of lacrimal system, Disorders of the orbit, Disorders of optic nerve and visual pathways |
| 379    | Other disorders of eye                                                                                                                                                                                                                     |
| 380    | Disorders of external ear                                                                                                                                                                                                                  |
| 386    | Vertiginous syndromes and other disorders of vestibular system                                                                                                                                                                             |
| 388    | Other disorders of ear                                                                                                                                                                                                                     |

## Input data

*Model inputs*

For GBD 2016, we used claims data from US claims data to model other sense organ diseases, since these conditions would not appear in inpatient hospital data. ICD-9 codes were assigned at the five-digit level to either acute or chronic conditions as listed elsewhere in the Appendix table 4.

### *Severity splits & disability weights*

The basis of the GBD disability weight survey assessments are lay descriptions of sequelae highlighting major functional consequences and symptoms. Severity splits for other sense organ diseases were calculated via the Medical Expenditure Panel Survey (MEPS) regression and outlined in the table below.

#### **Chronic:**

| Severity     | Proportion       | Health state                                                                     | Disability weight   |
|--------------|------------------|----------------------------------------------------------------------------------|---------------------|
| Severe       | 0.21 (0.15–0.28) | Vertigo                                                                          |                     |
| Moderate     | 0.37 (0.30–0.42) | This person has slight physical deformity which causes some worry and discomfort | 0.011 (0.005–0.021) |
| Asymptomatic | 0.42 (0.41–0.44) | Asymptomatic                                                                     | N/A                 |

#### **Acute**

| Severity     | Proportion       | Health state                                                                          | Disability weight   |
|--------------|------------------|---------------------------------------------------------------------------------------|---------------------|
| Mild         | 0.30 (0.23–0.37) | This person has low fever and mild discomfort but no difficulty with daily activities | 0.006 (0.002–0.012) |
| Moderate     | 0.25 (0.18–0.32) | This person has slight physical deformity which causes some worry and discomfort      | 0.011 (0.005–0.021) |
| Asymptomatic | 0.45 (0.43–0.46) | Asymptomatic                                                                          | N/A                 |

### **Modelling strategy**

For GBD 2016, hospital data were extracted separately for the chronic and acute conditions included in other sense organ diseases. The chronic data were extracted as prevalence, and acute as incidence. We then ran two separate DisMod-MR 2.1 models. The chronic model, with prevalence data, was run as a prevalence-only model. The acute model was run as a full model with incidence data, assuming zero excess mortality and duration of one week (remission 52). In both models, to correct for systematically lower data from 2000 MarketScan claims, we used a study-level covariate to crosswalk the 2000 data. Since the only data source is from the United States, we did not use any country-level covariates in this model.

We then aggregated chronic and acute prevalence outputs, resulting in the prevalence of other sense organ diseases by country, age, year, and sex.

Results from GBD 2016 are higher for other sense organ diseases because in GBD 2013 we used MEPS self-reported claims data, whereas in GBD 2015 and GBD 2016 MarketScan more accurately captures the



occurrence of these conditions. In GBD 2016 we were able to separately model acute and chronic conditions.

# Caries of Deciduous Teeth

## Flowchart

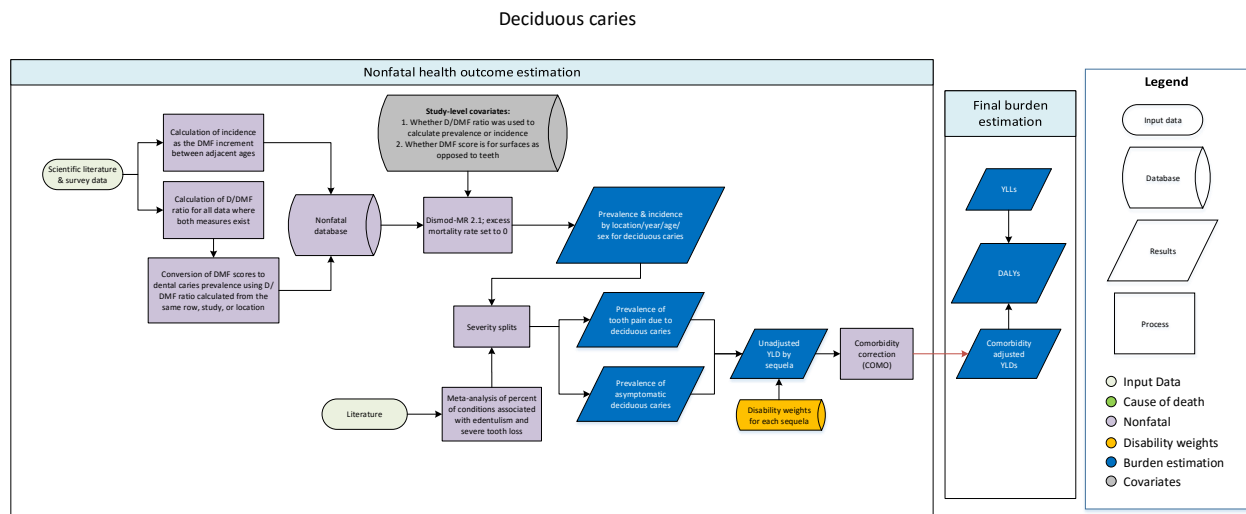

## Case definition

The case definition for dental caries is “teeth with unmistakable coronal cavity at dentin level, root cavity in cementum that feels soft or leathery to probing, temporary or permanent restorations, or missing teeth extracted due to a caries lesion.” This definition corresponds to an ICD-9 code of 521.0 and an ICD-10 code of K02.3 – K02.9. Most caries are subclinical in the sense that they do not cause symptoms a majority of the time. Once a carious lesion develops, it will occasionally recede without intervention. Generally, however, it worsens with time and eventually requires either filling or extraction. The major sequela associated with the condition is symptomatic caries, which is defined as “a toothache which causes some difficulty eating.”

Deciduous teeth are colloquially known by several names throughout the world, including “baby,” “milk,” or “fall” teeth. They start erupting in infants around 6 months of age and generally finish by the end of year three. Exfoliation of deciduous teeth begins around age 5-6 and usually is complete by age 12-14, when only permanent teeth remain. The name of this cause for GBD 2016 has been changes from ‘deciduous caries’ to ‘caries of deciduous teeth’.

## Dental caries and the DMFT index

Public health dentists commonly measure dental caries using the dmft/DMFT index, which is an incremental measure of the proportion of unhealthy teeth and is also a measure of an individual’s lifetime prevalence of caries. Lowercase letters (dmft) are used for deciduous dentition and uppercase letters (DMFT) for permanent dentition. D is for decayed, M for missing, F for filled, and T for teeth. The maximum dmft score is 20 and the maximum DMFT score is 32. Furthermore, some dentists prefer to measure dental caries in terms of tooth surfaces, rather than number of teeth, and report their results using an analogous dmfs/DMFS index. The maximum dmfs score is 88, and the maximum DMFS score is 128 or 148 depending on whether the third molars are counted.

The DMFT index is easy to measure and inter-rater reliability is high. However, the primary shortcoming of the DMFT is that it does not discriminate well between current and past caries. Strategies we employed to maximally utilize dmf/DMF data for estimating the prevalence of burden due to caries of deciduous teeth are described below.

## Input data

### *Model inputs*

#### Literature reviews

A literature review was conducted by the expert group for GBD 2010, and an additional systematic review was performed for GBD 2013. The search terms used in the GBD 2013 literature review for deciduous caries were (Deciduous caries[Title/Abstract]) OR (milk caries[Title/Abstract]) OR (baby caries[Title/Abstract]) OR (caries[Title/Abstract]) OR (dental health[Title/Abstract]) OR (oral health[Title/Abstract]) AND (prevalence[Title/Abstract]) AND ( "2010"[Date - Publication] : "2013"[Date - Publication]). Updates to systematic reviews are performed on an ongoing schedule across all GBD causes; an update for deciduous and permanent caries will be performed in the next one to two iterations.

We eliminated many data points to avoid repetition in the dataset, while striving to maintain as much data detail as possible. Redundancy tended to arise in three data descriptors: age, gender, and urbanicity. Our order of preference for maintaining detail was age, followed by gender, then urbanicity. Additionally, many of the studies presented dmft or DMFT scores, which represent lifetime prevalence and were often described as "caries experience." For the purposes of measuring the burden of disability from dental caries, we considered only data on current prevalence to be relevant, and thus converted lifetime prevalence data to current prevalence and incidence where possible (see below).

## Conversion of dmf/DMF scores to prevalence and incidence

### **Caries of deciduous teeth**

Many of the studies that reported lifetime prevalence of deciduous caries (dmf scores) provided detail on the component breakdown of these scores. We used these data to calculate a d/dmf ratio and convert the lifetime prevalence value into one that reflected current prevalence. For example, if the lifetime prevalence was reported as 0.8 with  $d = 1.5$  and  $dmf = 2$  ( $d/dmf$  ratio = 0.75), we adjusted the prevalence value to 0.6. When possible, we used within-study  $d/dmf$  ratios to convert lifetime prevalence to current prevalence. Otherwise, we converted to current prevalence using a weighted average  $d/dmf$  ratio at the country, region, super-region, or global level, in that order of preference.

For studies reporting dmf scores for successive age intervals, the increment in the dmf values between examinations was considered to be equivalent to the caries incidence over the study duration. We extrapolated incidence data from two types of studies. First, for longitudinal or cohort studies, we calculated the caries increment over successive ages and time periods as the difference between the DMF scores at each time point. Narrow age and time intervals were preferred; most were of three years or less. We did not extrapolate incidence data if the age or time interval was greater than 10 years. Secondly, if a study only performed a single cross-sectional examination, but reported data in age intervals of three years or less, we extrapolated incidence data in the same manner. Narrow age ranges

were considered necessary for this incidence extrapolation because the dental health of population cohorts has been observed to change in just a few years when preventive measures are instituted.

#### Data availability for deciduous caries:

|                        | <b>Prevalence</b> | <b>Continuous DMF score converted to prevalence</b> | <b>Continuous DMF score converted to incidence</b> |
|------------------------|-------------------|-----------------------------------------------------|----------------------------------------------------|
| Studies                | 188               | 119                                                 | 64                                                 |
| Countries/subnationals | 72/51             | 57/21                                               | 34/167                                             |
| GBD world regions      | 19                | 19                                                  | 16                                                 |

## Modeling strategy

### Separate estimates for caries of deciduous and permanent teeth

The natural histories of caries of deciduous teeth and caries of permanent teeth share many similarities, but they also share some important differences. Age patterns of decay in permanent and deciduous dentition are distinct, and duration of a carious lesion in deciduous teeth also tends to be shorter than an untreated episode of permanent caries. Sugar consumption and feeding with formula are both associated with development of deciduous caries, but not with permanent caries. Finally, it is unclear whether the gender patterns and regional differences are the same for both deciduous and permanent caries. For all of these reasons, we elected to model deciduous caries and permanent caries as separate entities and then add the estimates together for an overall estimation of the global burden of dental caries. This modeling approach was also taken in GBD 2010 and GBD 2013.

### DisMod model development: caries of deciduous teeth

Serious health consequences of deciduous caries were assumed to be uncommon and death from permanent caries very rare. For purposes of modeling, we therefore assigned excess mortality to be zero from age 0 to 100. We fixed incidence and prevalence at zero after age 12 when exfoliation is presumed to be complete. This age was chosen because 11 was the oldest age of a non-zero prevalence data point. We additionally assigned incidence and prevalence to be zero before age 6 months to indicate that this condition never begins at birth and is absent in the neonatal and post-neonatal periods. Incidence bounds of 0 to 4.0 for ages 1 to 10 years were chosen based on examining the dataset and adding a comfortable margin to the highest reported value. An upper remission bound of 1.0 for ages 0 to 5 years was chosen in order to fit the sharp increase in prevalence over this age range. As prevalence was assigned to be zero after age 14 anyway, we elected to not include a lower remission bounds.

No country-level covariates were included. We used a study-level covariate to indicate whether a given prevalence data point was of “true” current prevalence or calculated from lifetime prevalence using the d/dmf ratio. For both incidence and prevalence, we also used study-level covariates to indicate whether the dmf scores were for surfaces as opposed to teeth.

Because no “true” unconverted incidence values were present in the dataset, we could not crosswalk the extrapolated incidence values to reference incidence values for deciduous caries. Instead, we used higher heterogeneity settings for incidence values than for prevalence (0.7 for incidence, 0.2 for prevalence). We

calculated age mesh points at ages 0, 0.5, 1, 2, 3, 4, 5, 6, 7, 8, 9, 10, 11, 12, 13, 14, 15, and 100 years. High smoothness settings were used for both incidence and prevalence to allow for dynamic age trends.

| Covariate name                                  | Type                    | Measure    | Beta value               | Exponentiated value    |
|-------------------------------------------------|-------------------------|------------|--------------------------|------------------------|
| LDI (I\$ per capita)                            | Country covariate       | Prevalence | -0.101 (-0.142 - -0.067) | 0.904 (0.868 - 0.935)  |
| sugar unadjusted(g)                             | Country covariate       | Incidence  | 0.002 (-0.001 - 0.004)   | 1.002 (0.999 - 1.004)  |
| DMF score is for surfaces                       | Study-level x-covariate | Prevalence | 0.266 (0.193 - 0.340)    | 1.305 (1.213 - 1.405)  |
| DMF score is for surfaces                       | Study-level x-covariate | Incidence  | 1.970 (0.000 - 3.896)    | 7.173 (1.000 - 49.182) |
| d/dmf ratio used to convert lifetime prevalence | Study-level x-covariate | Prevalence | 0.246 (0.193 - 0.302)    | 1.279 (1.213 - 1.353)  |

Models were vetted based on the biological plausibility of the results, the extent to which estimates fit the data, and the plausibility of the range of estimates across location hierarchies.

#### Correction for edentulism

One systematic source of bias in the literature was the exclusion of edentate individuals from the study populations, which leads to systematic overestimation of caries prevalence when modeled over the entire population. To account for this bias, we used our GBD estimates of edentulism and severe tooth prevalence to adjust YLD estimates for dental caries. Using the final DisMod estimates for prevalence of edentulousness, we calculated the mean prevalence for each age and sex and averaged the 1990 and 2015 values. We then calculated a population-weighted mean prevalence for each region and each GBD super-region. The resulting super-regional averages were used to adjust the DisMod estimates for prevalence of permanent caries in calculating years lost due to disability (YLDs).

#### Disability weights

As described above, the GBD definition of disability associated with symptomatic dental caries is “this person has a toothache, which causes some difficulty eating.” The disability weight associated with this condition is 0.01 (0.005 – 0.019), as derived from the GBD Disability Weights Study.

Not all those with dental caries experience this disability all the time. We considered only those with active dentinal decay to experience symptomatic tooth pain. Those with deciduous caries who had undergone exfoliation or had their cavities filled were considered to have no disability. Likewise, those with permanent caries who had received fillings, had their cavities extracted, or lost a carious tooth altogether were considered to have no disability. Thus, two additional pieces of information are required to complete the calculation of years of life lived with disability (YLDs): proportion with symptoms and duration of disability.

To determine duration, we adapted the method employed by the Australian Burden of Disease (AusBoD) Study in 1996. For total duration, we used the posterior estimates of duration from final DisMod models. For those with symptoms, we split this total duration into two distinct phases of caries disability. The “initial” phase is characterized by *periodic* pain that we assigned to occur an average of one hour per day. The “terminal” phase is a period of *constant* symptoms at the end of an episode. The length of the

terminal phase was determined by literature review as described by the AusBoD group. For deciduous caries we used a study by Mason, et al. of children in the UK presenting to a casualty ward with tooth pain [1]. The length of time each child had been experiencing tooth pain was recorded. Based on the distribution of time courses, a log-normal distribution was plotted that approximated the average duration of *constant* symptoms at 27.6 days leading up to seeking care. For permanent caries, a similar study of the tooth pain experience of adults in New Zealand who presented to hospital dental departments and an emergency clinic resulted in an estimated 55.2 days spent in the terminal phase of caries. For those with severe disease, the length of time spent in the terminal phase was subtracted from the total duration to determine the amount of time spent in the initial phase. For those with mild disease, we considered the entire duration to be spent in the initial phase.

To determine proportion with symptoms, we completed a supplemental literature review of tooth pain and caries. We identified a total of 21 studies with data about the prevalence of pain. The studies were grouped according to the type of dentition studied (deciduous or permanent) and the location of the study group (high-income or low- and middle-income countries). We extracted data on the proportion in each group that described symptoms of pain related to their caries as well as a subset who described their symptoms as being severe. The proportions in each group were weighted according to sample size to give estimates of the relative sizes of three groups: asymptomatic, mild, and severe.

We considered asymptomatic individuals to experience no disability. Those with mild disease spent the entire duration in the initial phase of disease (one hour of pain per day). Those with severe disease spent a majority of the duration in the initial phase followed by a period of time in the terminal phase (constant pain). YLDs were calculated by multiplying the prevalence, duration, proportion, and disability weight for each age, country, sex, and year.

No other significant changes were made to the modeling strategy from GBD 2015 to GBD 2016.

# Caries of Permanent Teeth

## Flowchart

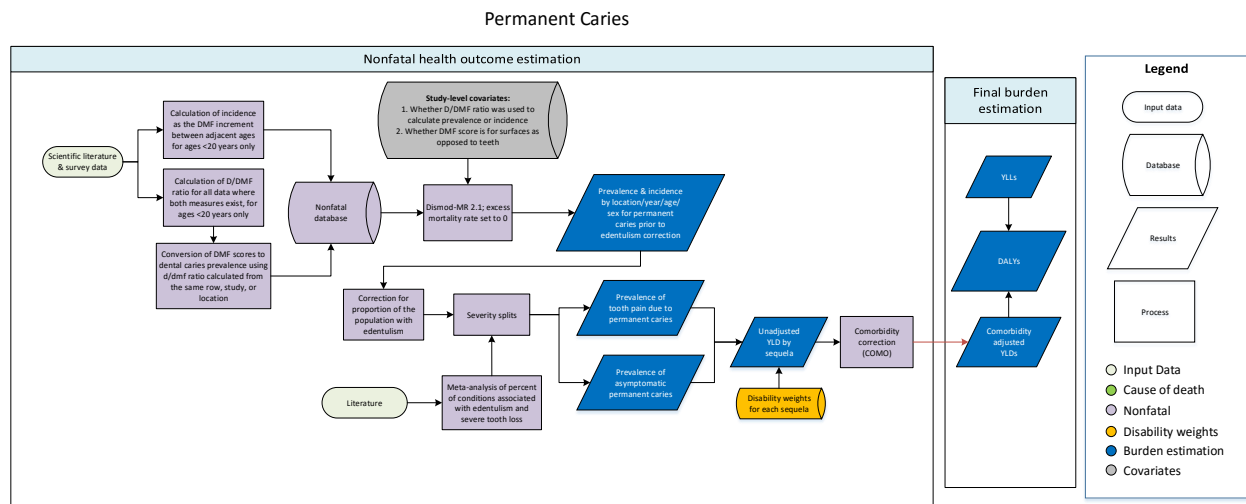

## Case definition

The case definition for dental caries is “teeth with unmistakable coronal cavity at dentin level, root cavity in cementum that feel soft or leathery to probing, temporary or permanent restorations, or missing teeth extracted due to a caries lesion.” This definition corresponds to an ICD-9 code of 521.0 and an ICD-10 code of K02.3 – K02.9. Most caries are subclinical in the sense that they do not cause symptoms a majority of the time. Once a carious lesion develops, it will occasionally recede without intervention. Generally, however, it worsens with time and eventually requires either filling or extraction. The major sequela associated with the condition is symptomatic caries, which is defined as “a toothache, which causes some difficulty eating.”

## Dental caries and the DMFT index

Public health dentists commonly measure dental caries using the dmft/DMFT index, which is an incremental measure of the proportion of unhealthy teeth and is also a measure of an individual’s lifetime prevalence of caries. Lowercase letters (dmft) are used for deciduous dentition and uppercase letters (DMFT) for permanent dentition. D is for decayed, M for missing, F for filled, and T for teeth. The maximum dmft score is 20 and the maximum DMFT score is 32. Furthermore, some dentists prefer to measure dental caries in terms of tooth surfaces, rather than number of teeth, and report their results using an analogous dmfs/DMFS index. The maximum dmfs score is 88, and the maximum DMFS score is 128 or 148 depending on whether the third molars are counted.

The DMFT index is easy to measure and inter-rater reliability is high. However, the primary shortcoming of the DMFT is that it does not discriminate well between current and past caries. Strategies we employed to maximally utilize dmf/DMF data for estimating the prevalence of burden due to permanent caries are described below.

## Input data

### Literature reviews

A literature review was conducted by the expert group for GBD 2010, and an additional systematic review was performed for GBD 2013. The search terms used in the GBD 2013 literature review for permanent caries were (Permanent caries[Title/Abstract]) OR (caries prevalence[Title/Abstract]) OR (dental health[Title/Abstract]) OR (oral health[Title/Abstract]) AND (prevalence[Title/Abstract]) AND (“2010”[Date - Publication] : “2013”[Date - Publication]). Updates to systematic reviews are performed on an ongoing schedule across all GBD causes, an update for deciduous and permanent caries will be performed in the next one to two iterations.

We eliminated many data points to avoid repetition in the dataset, while striving to maintain as much data detail as possible. Redundancy tended to arise in three data descriptors: age, gender, and urbanicity. Our order of preference for maintaining detail was age, followed by gender, then urbanicity. Additionally, many of the studies presented dmft or DMFT scores, which represent lifetime prevalence and were often described as “caries experience.” For the purposes of measuring the burden of disability from dental caries, we considered only data on current prevalence to be relevant, and thus converted lifetime prevalence data to current prevalence and incidence where possible (see below).

### Conversion of dmft/DMF scores to prevalence and incidence

#### Caries of Permanent Teeth

Whereas in the deciduous dentition, a vast majority of the dmft index is accounted for by caries, tooth loss is a major contributor to the DMF index for the permanent dentition. Caries of permanent teeth may not necessarily be the primary driver of this tooth loss, as other factors such as periodontal disease and trauma may contribute significantly. Thus, we performed the conversions of DMF scores to prevalence and incidence values as described above for permanent caries only in individuals ages 20 years or less.

#### Data availability for caries of permanent teeth:

|                        | <b>Prevalence</b> | <b>Incidence</b> | <b>Continuous DMF score converted to prevalence</b> | <b>Continuous DMF score converted to incidence</b> |
|------------------------|-------------------|------------------|-----------------------------------------------------|----------------------------------------------------|
| Studies                | 160               | 4                | 89                                                  | 31                                                 |
| Countries/subnationals | 158/68            | 4/2              | 46/19                                               | 24/11                                              |
| GBD world regions      | 19                | 3                | 19                                                  | 14                                                 |

## Modeling strategy

### Separate estimates of caries of deciduous teeth and caries of permanent teeth

The natural history of deciduous and permanent caries share many similarities, but they also share some important differences. Age patterns of decay in permanent and deciduous dentition are distinct, and duration of a carious lesion in deciduous teeth also tends to be shorter than an untreated episode of permanent caries. Sugar consumption and feeding with formula are both associated with development of



deciduous caries, but not with permanent caries. Finally, it is unclear whether the gender patterns and regional differences are the same for both deciduous and permanent caries. For all of these reasons, we elected to model deciduous caries and permanent caries as separate entities and then add the estimates together for an overall estimation of the global burden of dental caries. This is the modeling approach which was also taken in GBD 2010 and GBD 2013.

#### DisMod model development: caries of permanent teeth

Serious health consequences of permanent caries were also assumed to be uncommon and death from permanent caries very rare. We therefore assigned excess mortality to be zero from age 0 to 100. The dataset suggested that permanent caries are sometimes incident in 5-year-olds, so we fixed incidence and prevalence at 0 for ages 0 to 4. Incidence bounds were again chosen based on examining the dataset and adding a margin to the highest reported value. In this case, incidence bounds were 0 – 2. Lower bounds for remission were set at 0.2 and upper bounds were set at 3.

As with permanent caries, no country-level covariates were included. We used a study-level covariate to indicate whether a given prevalence data point was of “true” current prevalence or calculated from lifetime prevalence using the D/DMF ratio, and another study-level covariate to indicate whether a given incidence values was extrapolated from DMF scores. For both incidence and prevalence, we also used study-level covariates to indicate whether the DMF scores were for surfaces as opposed to teeth.

We calculated age mesh points at ages 0, 4, 5, 8, 10, 12, 15, 19, 20, 25, 29, 30, 35, 40, 45, 50, 55, 60, 70, 80, 90, and 100 years. Heterogeneity was set to 0.5 for both incidence and prevalence. High smoothness settings were used for both incidence and prevalence to allow for dynamic age trends.

| Covariate name                                  | Type                    | Measure    | Beta value               | Exponentiated value   |
|-------------------------------------------------|-------------------------|------------|--------------------------|-----------------------|
| LDI (I\$ per capita)                            | Country covariate       | Prevalence | -0.345 (-0.433 - -0.259) | 0.708 (0.648 - 0.772) |
| sugar unadjusted(g)                             | Country covariate       | Incidence  | -0.003 (-0.004 - -0.001) | 0.997 (0.996 - 0.999) |
| DMF score is for surfaces                       | Study-level x-covariate | Incidence  | 1.000 (0.000 - 2.000)    | 2.717 (1.000 - 7.389) |
| DMF score is for surfaces                       | Study-level x-covariate | Prevalence | 0.324 (0.185 - 0.453)    | 1.383 (1.203 - 1.573) |
| DMF score used to calculate incidence           | Study-level x-covariate |            | 0.266 (0.160 - 0.299)    | 1.304 (1.174 - 1.348) |
| d/dmf ratio used to convert lifetime prevalence | Study-level x-covariate | Prevalence | -0.204 (-0.285 - -0.120) | 0.815 (0.752 - 0.887) |

Although studies were screened carefully during data extraction to ensure that they specified whether they were measuring permanent or deciduous caries, some data points were marked as outliers during modeling due to their high prevalence values in young ages, as it was deemed likely that some of these studies were reporting deciduous in addition to permanent caries.

As with deciduous caries, models for permanent caries were vetted based on the biological plausibility of the results, the extent to which estimates fit the data, and the plausibility of the range of estimates across location hierarchies.

### Correction for edentulism

One systematic source of bias in the literature was the exclusion of edentate individuals from the study populations, which leads to systematic overestimation of caries prevalence when modeled over the entire population. To account for this bias, we used our GBD estimates of edentulism and severe tooth prevalence to adjust YLD estimates for dental caries. Using the final DisMod estimates for prevalence of edentulousness, we calculated the mean prevalence for each age and sex and averaged the 1990 and 2015 values. We then calculated a population-weighted mean prevalence for each region and each GBD super-region. The resulting super-regional averages were used to adjust the DisMod estimates for prevalence of permanent caries in calculating years lost due to disability (YLDs).

### Disability weights

As described above, the GBD definition of disability associated with symptomatic dental caries is “this person has a toothache, which causes some difficulty eating.” The disability weight associated with this condition is 0.01 (0.005 – 0.019), as derived from the GBD Disability Weights study.

Not all those with dental caries experience this disability all the time. We considered only those with active dentinal decay to experience symptomatic tooth pain. Those with deciduous caries who had undergone exfoliation or had their cavities filled were considered to have no disability. Likewise, those with permanent caries who had received fillings, had their cavities extracted, or lost a carious tooth altogether were considered to have no disability. Thus, two additional pieces of information are required to complete the calculation of years of life lived with disability (YLDs): proportion with symptoms and duration of disability.

To determine duration, we adapted the method employed by the Australian Burden of Disease (AusBoD) Study in 1996. For total duration, we used the posterior estimates of duration from final DisMod models. For those with symptoms, we split this total duration into two distinct phases of caries disability. The “initial” phase is characterized by *periodic* pain that we assigned to occur an average of one hour per day. The “terminal” phase is a period of *constant* symptoms at the end of an episode. The length of the terminal phase was determined by literature review as described by the AusBoD group. For deciduous caries we used a study by Mason, et al. of children in the UK presenting to a casualty ward with tooth pain [1]. The length of time each child had been experiencing tooth pain was recorded. Based on the distribution of time courses, a log-normal distribution was plotted that approximated the average duration of *constant* symptoms at 27.6 days leading up to seeking care. For permanent caries, a similar study of the tooth pain experience of adults in New Zealand who presented to hospital dental departments and an emergency clinic [2] resulted in an estimated 55.2 days spent in the terminal phase of caries. For those with severe disease, the length of time spent in the terminal phase was subtracted from the total duration to determine the amount of time spent in the initial phase. For those with mild disease, we considered the entire duration to be spent in the initial phase.

To determine proportion with symptoms, we completed a supplemental literature review of tooth pain and caries. We identified a total of 21 studies with data about the prevalence of pain. The studies were grouped according to the type of dentition studied (deciduous or permanent) and the location of the study group (high-income or low- and middle-income countries). We extracted data on the proportion in each group that described symptoms of pain related to their caries as well as a subset who described their symptoms as being severe. The proportions in each group were weighted according to sample size to give estimates of the relative sizes of three groups: asymptomatic, mild, and severe.

We considered asymptomatic individuals to experience no disability. Those with mild disease spent the entire duration in the initial phase of disease (one hour of pain per day). Those with severe disease spent a majority of the duration in the initial phase followed by a period of time in the terminal phase (constant pain). YLDs were calculated by multiplying the prevalence, duration, proportion, and disability weight for each age, country, sex, and year.

No additional changes were made to this modeling strategy.

# Chronic Periodontal Disease

## Flowchart

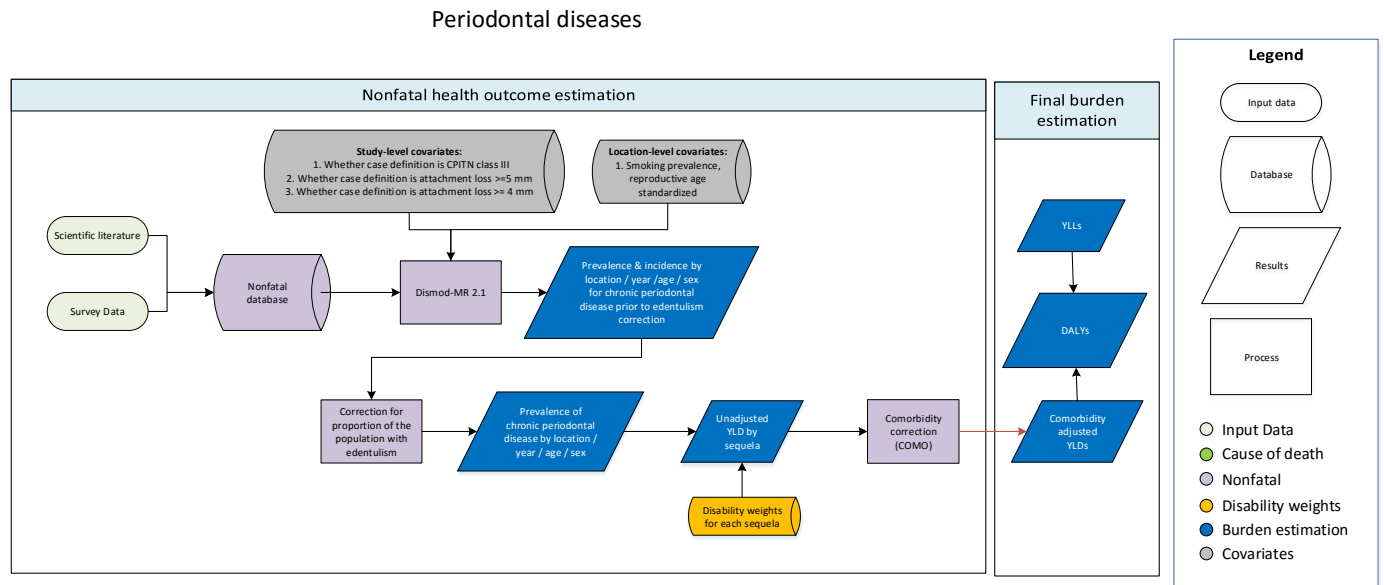

## Case definition

Chronic periodontal disease is caused by chronic bacterial infection around the teeth. Symptoms of gingivitis, the mildest form of the disease, include swelling, redness, and propensity of the gums to bleed when perturbed. If the infection is not treated appropriately, it will eventually spread below the gum line leading to a chronic inflammatory state of the periodontal tissues. Over time, there will be loss of gingival tissue and alveolar bone destruction. Teeth will become loose and may need to be extracted.

The GBD definition of disability associated with symptomatic severe periodontal disease is “bad breath, a bad taste in the mouth, and gums that bleed a little from time to time, but which does not interfere with daily activities.” The ICD-10 codes for periodontal disease are K05.0 – K05.6, and the ICD-9 codes are 523.0 – 523.9.

Defining periodontal disease in a meaningful, reproducible manner has been an ongoing challenge for public health dentists. Attachment loss (AL) and pocket depth (PD) have emerged as the most common metrics of periodontal health measurement. Attachment loss (AL) is measured as the difference between the distance from the gingival margin to the bottom of the pocket and the distance from the cemento-enamel junction to the bottom of the pocket.

The Community Periodontal Index of Treatment Needs (CPITN) is a classification system that was developed by the WHO as a standardized method of periodontal health measurement [1]. CPITN classification is based on quantifying the probing depth between teeth and gums. The mouth is divided into 6 sections, called sextants. Sextants with fewer than two teeth are excluded. Multiple teeth in each sextant are examined. A standard-sized probe is used with depth markings from 3.5 to 5.5 mm. The probe

is inserted into the sulcus between a tooth and the gingiva until it meets resistance. The surrounding area is then explored with the probe to determine the maximum depth of the pocket. Multiple areas around each tooth are probed. Scores range from 0 to 4 in order of increasing severity. When the CPITN method was employed, we considered those with Class 4 only. We excluded studies in which the study population was reported as the number of sextants rather than the number of individuals surveyed.

In 2007, a new CDC proposal for gold standard diagnosis of severe, chronic periodontitis was published. This standard specified that a more strict definition of the condition should be implemented. This more exclusive definition of chronic periodontal disease includes  $\geq 2$  interproximal sites with AL  $\geq 6$  mm **AND**  $\geq 1$  interproximal site with PD  $\geq 5$  mm [2].

We included the following definitions of severe periodontal disease commonly found in the literature:

1. Community Periodontal Index of Treatment Needs (CPITN) – Class 4 only
2. Clinical Attachment Loss (AL) > 6mm
3. Clinical Attachment Loss (AL) > 5mm
4. Clinical Attachment Loss (AL) > 4mm
5. Gingival Pocket Depth (PD) > 5mm

If more than one type of data was included in a study, our first preference was for CPITN = 4, followed by AL >6 mm, with PD >5 considered the least accurate representation of the GBD case definition. AL > 6mm was preferred over AL > 5mm, followed by AL > 4mm. All definitions were extracted for each datum as available this time, and a series of study covariates were used to crosswalk non-standard definitions to the reference standard of CPITN stage 4 (see below).

## Input data

### *Model inputs*

For GBD 2010, a review of the literature on periodontal disease prevalence was conducted by the Expert Group. A new systematic review was conducted for GBD 2013. The GBD 2013 literature review used the following search terms: (Periodontal disease[Title/Abstract]) OR (periodontitis[Title/Abstract]) OR (periodontal[Title/Abstract]) AND (prevalence[Title/Abstract]) AND (“2010”[Date - Publication] : “2013”[Date - Publication]).

In both systematic reviews, there was a hierarchical preference for case definitions: if more than one type of data was included in a study, our first preference was AL followed by PD, with CPITN considered the least accurate representation of the GBD case definition. Updates to systematic reviews are performed on an ongoing schedule across all GBD causes; an update for chronic periodontal disease will be performed in the next one to two iterations.

|                               | <b>Prevalence</b> | <b>Mortality</b> |
|-------------------------------|-------------------|------------------|
| <b>Studies</b>                | 97                | 4                |
| <b>Countries/subnationals</b> | 48/15             | 3/1              |
| <b>GBD world regions</b>      | 18                | 2                |

## Modeling strategy

### Overview

Evidence for chronic periodontal disease being a direct, proximate cause of death is lacking. As such, it was not included in overall causes of death analysis. However, there is a developing body of literature to suggest that those with chronic periodontal disease may be at increased risk of death from other causes. Relative risk data were, therefore, included in modeling of morbidity, but overall years of life lost (YLLs) were estimated to be zero. Models of disease burden due to chronic periodontal disease instead focused on estimating morbidity (YLDs) associated with the condition, and chronic periodontal disease was not included in risk factor analysis of any other condition.

### Correction for edentulism

Bias in the dataset was felt to be limited, but some systematic bias was present in the definition of the study populations. In virtually all studies, edentate persons were excluded from evaluation. This exclusion is justified in the context of periodontal disease surveillance because advanced periodontal disease is not common in those who are toothless. To account for the systematic bias inherent in excluding those with severe tooth loss from the denominator, we discounted the prevalence numbers estimated by DisMod MR 2.1. For example, if 40% of 70-74 year old females were estimated to be edentate in a certain region, the corresponding estimates for advanced periodontal disease prevalence were reduced to 60% of the original value.

### DisMod model development

Mortality was fixed to zero and relative risk was fixed to 1.0 before age 30, as any excess cardiovascular events that occur in those with severe tooth loss would not be expected at young ages. Incidence and prevalence were assigned to be zero until age 8 as periodontal disease is largely considered to be a disease of adulthood. Incidence was allowed to rise beginning at age 9, based on the youngest age at which there was a non-zero point estimate for prevalence in the dataset.

Bounds were assigned for remission and excess mortality to improve plausibility in the DisMod estimates. Remission was bounded 0 to 0.05 and excess mortality rate was bounded to 0.0001. We considered both bounds to be within reasonable ranges for the observed natural history of the disease.

Study-level covariates were created for whether the data use a case definition of CPITN class III periodontal disease as opposed to the reference definition of class IV, and for whether the data use a case definition of attachment loss  $\geq 5$  mm as opposed to the reference definition of  $\geq 6$  mm. We did not identify any studies for which the only case definition reported was attachment loss  $\geq 4$  mm.

Reproductive age-standardized smoking prevalence was used as a country-level covariate.

Models were vetted based on the biological plausibility of the results, the extent to which estimates fit the data, and the plausibility of the range of estimates across location hierarchies.

| <b>Covariate name</b>                                                                      | <b>Type</b>             | <b>Measure</b> | <b>Beta value</b>     | <b>Exponentiated value</b> |
|--------------------------------------------------------------------------------------------|-------------------------|----------------|-----------------------|----------------------------|
| Smoking Prevalence (Reproductive Age Standardized)                                         | Country covariate       | Prevalence     | 0.097 (0.004 - 0.194) | 1.102 (1.004 - 1.215)      |
| Data corresponds to those with CPITN class III periodontal disease (class IV is reference) | Study-level x-covariate | Prevalence     | 0.211 (0.008 - 0.575) | 1.235 (1.008 - 1.777)      |
| Data corresponds to those with attachment loss $\geq 5$ mm (reference is $\geq 6$ mm)      | Study-level x-covariate | Prevalence     | 0.903 (0.657 - 1.126) | 2.468 (1.928 - 3.083)      |

### Disability calculation and YLDs

Because those who are edentate cannot have advanced periodontal disease, we corrected for toothlessness as described above. Using the DisMod estimates for prevalence of edentulism, we calculated the mean prevalence for each age and sex and averaged the 1990 and 2015 values. We then calculated a population-weighted mean prevalence for each region followed by the same for each GBD super-region. The resulting super-regional averages were used to adjust the estimates for prevalence of advanced periodontal disease in calculating years lost due to disability (YLDs).

We considered all estimated prevalent cases of chronic periodontal disease to experience the disability described by “bad breath, a bad taste in the mouth, and gums that bleed a little from time to time, but this does not interfere with daily activities.” The GBD Disability Survey differentiated between those who experience pain and those who do not, but the calculated disability weight was the same for both forms of the condition, 0.007 (0.003 – 0.014).

No other changes were made for GBD 2016.

# Edentulism & Severe Tooth Loss

## Flowchart

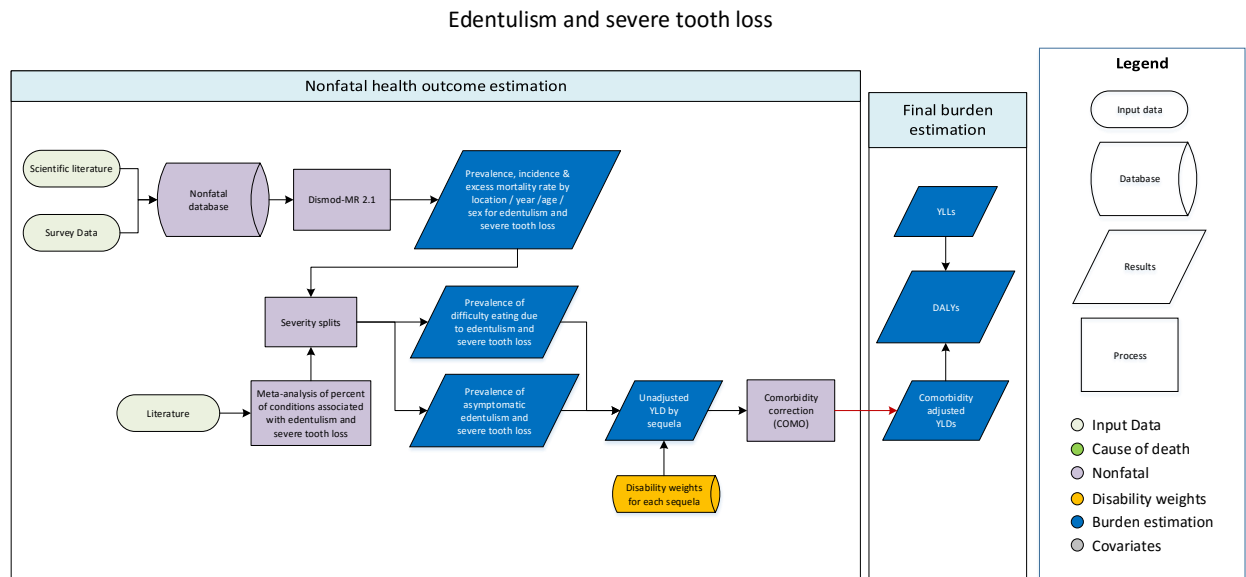

## Case definition

The case definition of edentulism and severe tooth loss includes any individual with fewer than nine remaining permanent teeth; toothlessness of infancy is not included. The assessment of this disease includes quantification of the prevalence of the disease as well as estimation of the major sequelae: asymptomatic toothlessness and symptomatic toothlessness leading to “great difficulty in eating meat, fruits, and vegetables.” A small body of evidence has begun to emerge that implicates edentulousness as predisposing individuals to increased risk for ischemic cardiovascular events including myocardial infarction and stroke. These data are sparse but have been included in models estimating burden of major tooth loss. However, edentulism was not included in the risk factor analysis for ischemic cardiovascular diseases.

## Input data

### *Model inputs*

An initial literature review was done by the Expert Group for GBD 2010, including published articles as well as the results of national and subnational reports. A new systematic review was completed for GBD 2013. The search terms for this systematic review included: (Edentulism[Title/Abstract]) OR (edentulous[Title/Abstract]) OR (edentulousness[Title/Abstract]) OR (severe tooth loss[Title/Abstract]) OR (total tooth loss[Title/Abstract]) OR (complete tooth loss[Title/Abstract]) AND (prevalence[Title/Abstract]) AND (“2010”[Date - Publication] : “2013”[Date - Publication]).

While an additional literature review was not performed for GBD 2015, new World Health Survey data were added for 47 countries. Updates to systematic reviews are performed on an ongoing schedule



across all GBD causes; an update for edentulism and severe tooth loss will be performed in the next one to two iterations.

Bias in the dataset was considered to be negligible. Diagnostic criteria for this condition are very clear (< 9 teeth). Additionally, all included studies are considered representative of the study population. Thus, covariates to account for excess variability were not deemed necessary. Few data points were marked as outliers during the modeling process.

|                        | <b>Prevalence</b> | <b>Incidence</b> | <b>Mortality</b> |
|------------------------|-------------------|------------------|------------------|
| Sources                | 151               | 11               | 8                |
| Countries/subnationals | 75/11             | 4/5              | 5/4              |
| GBD world regions      | 20                | 4                | 3                |

## Modeling strategy

### Overview

First, estimates for the prevalence of edentulism and severe toothlessness were calculated for each location/year/sex/age using DisMod-MR 2.1. Then, estimates of the proportion of the population with access to dentures were generated for each location, and the disability weight for “great difficulty in eating meat, fruits, and vegetables” was applied to the proportion of the population with edentulism and no access to dentures.

### DisMod model development

As would be expected for an irreversible condition, remission was fixed at zero for all ages. Mortality and relative risk were both fixed at zero before age 30, as any excess cardiovascular events resulting from severe tooth loss would not be expected at younger ages. We also assigned incidence and prevalence to be zero during childhood. Incidence was allowed to rise beginning at age 15, which was chosen based on the age at which the permanent dentition is expected to have fully formed in all individuals. The random effect limits for all locations were bounded at +/- 1.

As mentioned above, the criteria for diagnosis of edentulism are straightforward, and bias in the dataset was considered negligible. Thus, no study-level covariates were used in modeling the prevalence of edentulism. We included lnLDI as a country-level covariate, with a minimum beta value of 0.02; see results in the table below.

| <b>Covariate name</b> | <b>Type</b>       | <b>Measure</b> | <b>Beta value</b>     | <b>Exponentiated value</b> |
|-----------------------|-------------------|----------------|-----------------------|----------------------------|
| LDI (I\$ per capita)  | Country covariate | Prevalence     | 0.026 (0.020 - 0.043) | 1.027 (1.021 - 1.044)      |

Models were vetted based on the biological plausibility of the results, the extent to which estimates fit the data, and the plausibility of the range of estimates across location hierarchies. We have made no substantive changes in the modeling strategy from GBD 2013.

## Disability weights

The disability weight used for symptomatic toothlessness leading to “great difficulty in eating meats, fruits, and vegetables” is 0.067 (0.045 – 0.095) as determined by the GBD Disability Survey. We considered all those with severe tooth loss and no access to dentures to experience this disability. However, the proportion of those with edentulism and severe tooth loss who have dentures has not been studied extensively.

In order to estimate the proportion of edentulous individuals with no access to dentures, we completed a supplemental literature review of dentures prevalence. Only six systematic surveys of dentures prevalence were identified, all in high- and middle-income countries. All were completed since 2000. After extracting the data from the studies, we performed linear regressions of denture presence and denture absence against health system access (HSA), a standardized covariate of treatment availability used in many disease estimation models. From the results of the regression, the prevalence of no dentures was calculated for all super-regions. We then completed a population-weighted average of all countries in the super-region based on 2003 populations, the average year of the dentures studies. Uncertainties for the prevalence of dentures were calculated by finding the standard deviation and standard error of the calculated prevalence values.

The estimated prevalence of dentures in each location was used to calculate the proportion of individuals with asymptomatic edentulism and severe tooth loss (e.g., those who have access to dentures) and difficulty eating due to edentulism and severe tooth loss (e.g., those without access to dentures). This latter sequela was included as a cause of years lost due to disability (YLDs).

## Other Oral Disorders

Other oral disorders encompass a wide variety of dental, tongue, and jaw disorders and malformations, including all oral disorders that are not included in the case definitions of permanent or deciduous dental caries, periodontal disease, or edentulism and severe tooth loss. All data on the prevalence of other oral disorders were obtained from the United States Medical Expenditure Panel Surveys, a nationally representative survey conducted yearly from 1996 to 2011 by the US Agency for Healthcare Research and Quality.

These data were modelled in DisMod-MR 2.1 using a prevalence-only model with age mesh points set at 0, 0.5, 1, 5, 10, 20, 30, 40, 50, 60, 70, 80, 90, and 100 years of age. Heterogeneity for prevalence was set to the default of 0.5, and smoothness for prevalence was set to the default of 0.3. No study-level or country-level covariates were used in this model other than the study-level covariate for sex, which was fixed at the super-region level. This model provided us with estimates of the prevalence of other oral disorders for every location/age/sex combination.

# Injuries

## Flowchart

### Nonfatal Injuries Flow Chart

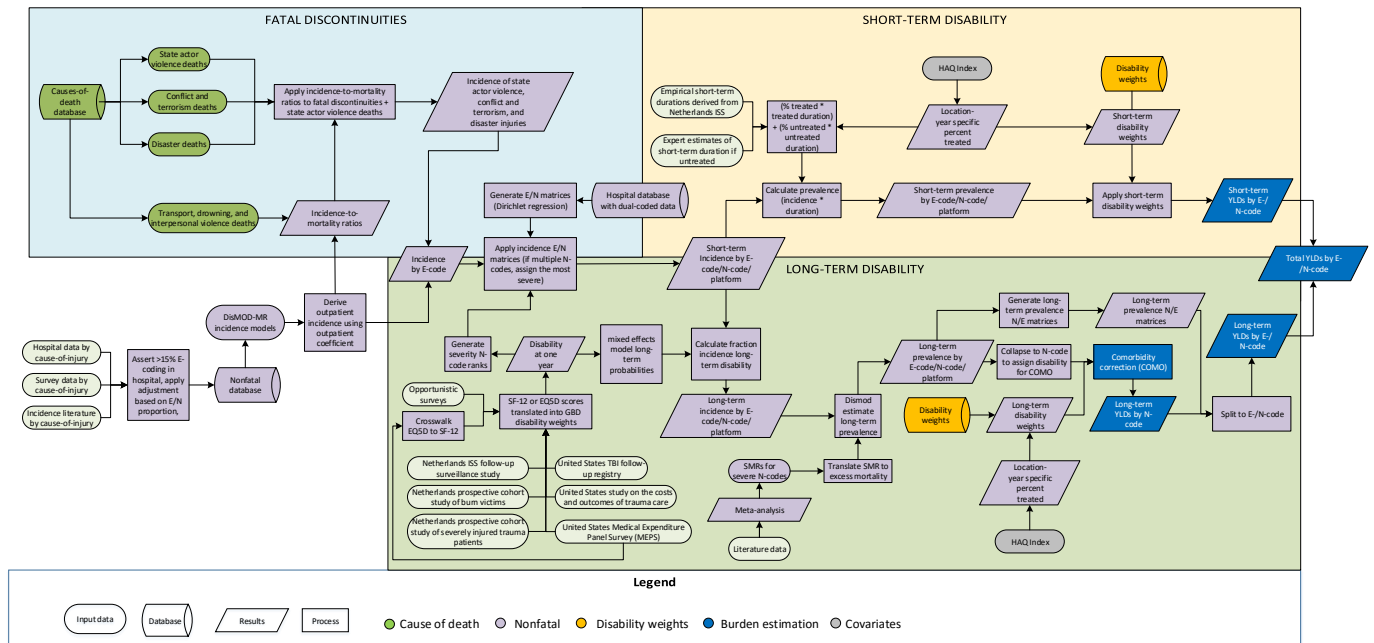

## Case definition

For GBD 2016, the Injuries estimation process for non-fatal health outcomes encompasses a range of 29 causes, including transport injuries, falls, drowning, self-harm, interpersonal violence, and animal contact. Injury incidence is defined using ICD-9 codes E000-E999 and ICD-10 chapters V to Y. For non-fatal estimation, Chapters S and T in ICD-10 and codes 800-999 in ICD9 are used to estimate morbidity. Each of these 29 causes can result in a variety of physical injury sequelae (i.e. traumatic brain injury), which we call the “nature of injury.” Though the initial DisMod models are the “cause of injury” level (ie, drowning), each cause of injury is broken out into cause-nature pairs. For the first time in GBD 2016, we report incidence, prevalence, and YLDs due to injuries at the cause-nature pair level rather than the cause of injury level in aggregate.

We make additional distinctions between inpatient and outpatient injuries, and between short-term and long-term injuries. Inpatient injuries are defined as injuries that led to hospitalization, whereas outpatient injuries are ones that occurred in outpatient settings or emergency care. We define short-term injuries as injuries lasting less than one year, and long-term injuries as those lasting longer than one year, at which point we assume lifelong disability.

## Input data

### *Model inputs*

For GBD 2016, to estimate morbidity from injuries, we used data from hospital records, emergency department records, and surveys to produce years lost to disability (YLDs) by country, year, sex, age, external cause-of-injury, and nature of injury category.

Unfortunately, quite a few countries report their data using a mix of cause of injury and nature of injury codes. In order to retain as much of the data as possible, we included all datasets that had at least 15% of cases coded to the cause of injury. Previously, we chose 45% as the threshold, but in order to include as much data as possible for GBD 2016, we lowered the threshold to 15%. We made this distinction after assessing the proportions of major injury causes (road injury and falls) in each of the data sources. We concluded that there were no obvious differences between country data with 15%–45% coverage of external cause codes and those with more than 45% coverage. Below the 15% threshold, the cause of nature coding became more disproportionate when compared to sources with higher cause of nature coding. (We assessed the raw hospital data to make sure that there was no disproportionate coding to certain causes in the 15%–45% cause of injury coding range. We increased the cause-specific injury cases from these datasets proportionately to sum to the total number of injury cases.

Conflict, war and executions and police conflict data were obtained from the Uppsala Conflict Data Program [17], the International Institute for Strategic Studies [18], the Armed Conflict Location and Event Dataset [TBD] and the Social Conflict Analysis Database [TBD], vital registration systems. Disaster data were obtained from the International Disaster Database from the Center for Research on the Epidemiology of Disasters [19].

### *Data searches*

For GBD 2016, hospital and emergency department records were supplemented with more recent and available site-years. Additionally, we reviewed a list of sources, which was composed primarily of reports and surveys that could be incorporated into non-fatal estimates of injuries prior to estimation. Hospital utilization envelopes that gave reliable denominators for hospital data allowed for the use of more data sources. We applied correction factors to account for repeat hospital visits within a three-month time window (derived from US claims data) to the incidence estimates to avoid double-counting multiple health service contacts for the same injury.

Infrequently, data points were marked as outliers. Reasons for this were that the data point did not follow the age or time pattern as expected and/or if the incidence rate of people sustaining an injury from a certain cause of injury was not plausible.

## Modelling strategy

As in previous GBD iterations, two categories of injury severity were separately modelled: injuries warranting inpatient care and injuries warranting other health care. Injuries warranting inpatient care refer to injury cases of sufficient severity to require inpatient care, if there are no restrictions in access to health care. Injuries warranting other health care refer to injury cases of sufficient severity to require health care attention but not hospitalisation. This category includes emergency department visits. In order to best measure the burden of injuries, the GBD 2016 estimates excluded trivial injuries by

restricting morbidity analysis to cases warranting some form of health care in a system with full access to health care. We intended to include cases with injuries that did not receive care in areas with restricted access to health care, but that would have warranted some type of health care in a system with full access to health care. In some surveys, after asking about recall of injuries in the past month or year respondents were further probed whether they sought care and if they did not what the reasons were. This allowed us to include cases who cited financial or geographical barriers as reasons for not seeking care.

### Cause-of-injury incidence

The list of unique (ie, not counting aggregate categories like road injuries or interpersonal violence) cause-of-injury categories has increased to 29 for GBD 2015 following the addition of “self-harm by firearm,” and “self-harm by other specified means.” The fatal discontinuities cause-of-injury categories now only include “conflict and terrorism” and “exposure to forces of nature, disaster” rather than “collective violence and legal intervention,” which encompassed both in GBD 2015. Included previously in “collective violence and legal intervention” were injuries due to “executions and police conflict.” For GBD 2016, we are treating executions and police conflict as a typical cause of injury that has a steady state over time rather than as a fatal discontinuity.

The majority of incidence data exist at the external cause-of-injury level. Thus, incidence for cause-of-injury categories was modelled using DisMod-MR 2.0. DisMod-MR 2.0 is a descriptive epidemiological meta-regression tool that produces simultaneous estimates of disease incidence, prevalence, remission, and mortality. Multiple datasets from hospital, emergency/outpatient departments, and survey datasets were fed into these incidence models. We separately estimated two categories of injury severity: inpatient and outpatient injuries. For GBD 2016 we used two covariates in each DisMod-MR model as a multiplier from inpatient to outpatient incidence, namely covariates “outpatient,” “in- and outpatient.”

Due to the sporadic nature of the incidence of injuries and a lack of time-trend that results from fatal discontinuities, DisMod-MR 2.0 was not used to model incidence due to fatal discontinuities, including exposure to forces of nature (ie, natural disaster) and conflict and terrorism. For GBD 2015, to estimate incidence that would be expected to occur when there are fatal discontinuities, the mortality rate for these cause-of-injury categories was multiplied by the average country-year-age-sex-specific incidence-to-mortality ratio within several cause-of-injury categories that likely exhibit similar case-fatality ratios. This method resulted in some outliers driven by patterns in the cause-of-injury categories used to compute the incidence-mortality ratios that did not reflect accurate patterns in the fatal discontinuities. For GBD 2016, the incidence-to-mortality ratios were averaged over super-region, year, and sex to limit the variability in the ratios applied to fatal discontinuities. For disaster incidence, the incidence-to-mortality ratio was calculated as an average of the road injuries cause, and drowning if there was a water-related natural disaster in that specific country-year noted in the International Disaster Database [19]. For conflict and terrorism, the incidence-to-mortality ratio was calculated as an average of the road injuries and interpersonal violence causes. We treated executions and police conflict as similar to the fatal discontinuities in that we imputed the incidence using the incidence-to-mortality ratio of interpersonal violence.

## Follow-up studies

Similar to GBD 2015, we used follow-up data obtained from a pooled dataset of six follow-up studies from China, the Netherlands, and the US, which followed up patients for at least one year after the injury and the Medical Expenditure Panel Survey (MEPS) [20-27].

### Details of injury follow-up surveys used in GBD 2016

| Dataset                                                                              | Year      | Type of data collected                                                                                                                             | Type of patients                                                                                                                                                                                                                          | Setting                                                                                      | Sample size* and response |
|--------------------------------------------------------------------------------------|-----------|----------------------------------------------------------------------------------------------------------------------------------------------------|-------------------------------------------------------------------------------------------------------------------------------------------------------------------------------------------------------------------------------------------|----------------------------------------------------------------------------------------------|---------------------------|
| Guangdong follow up survey, China <sup>#</sup>                                       | 2006–2007 | Follow up survey among sample of ISS patients                                                                                                      | Patients (15+ years) who were hospitalized that had been injured by road traffic injury, fall, blunt or penetrating trauma                                                                                                                | Based on three national injury surveillance hospitals in Zhuhai, Guangdong Province in China | 998 (response 87%)        |
| LIS follow up survey, Netherlands <sup>1</sup>                                       | 2001–2002 | Follow-up survey among stratified sample of ISS patients (oversampling less common, severe injuries)                                               | Patients (15+ years) who visited the Emergency Department of a hospital and were discharged to the home environment and patients who were admitted to hospital                                                                            | Based on 17 public hospitals in the Netherlands                                              | 8,564 (response 37%)      |
| LIS follow-up survey, Netherlands <sup>2</sup>                                       | 2007–2008 | Follow-up survey among stratified sample of ISS patients (oversampling less common, severe injuries)                                               | Patients (15+ years) who visited the Emergency Department of a hospital and were discharged to the home environment and patients who were admitted to hospital                                                                            | Based on 15 public hospitals in the Netherlands                                              | 8,057 (response 36%)      |
| NSCOT – National study on Costs and Outcomes of Trauma, USA <sup>4</sup>             | 2001–2002 | A prospective cohort study was conducted among a sample of adult trauma patients treated at Level I trauma centers and non-trauma center hospitals | Patients treated for a moderate to severe injury (as defined by at least one injury of an Abbreviated Injury Scale (AIS) score of 3 or greater                                                                                            | Based on 69 hospitals in 12 states in the US                                                 | 5,191 (response 61%)      |
| SCTBIFR – South Carolina Traumatic Brain injury Follow-up Registry, USA <sup>5</sup> | 1999–2002 | A prospective cohort study was conducted among injured in-patients with a traumatic brain injury-related injury                                    | Patients (15+ years) who were admitted to hospitals and met the CDC case definition of TBI – trauma to the head associated with altered consciousness, amnesia, neurological abnormalities, skull fracture, intracranial lesion, or death | Discharged from all nonfederal in-state acute care hospitals                                 | 7,613 (response 28%)      |

| Dataset                                       | Year      | Type of data collected                                                            | Type of patients                           | Setting                                             | Sample size* and response |
|-----------------------------------------------|-----------|-----------------------------------------------------------------------------------|--------------------------------------------|-----------------------------------------------------|---------------------------|
| Burns outcome study, Netherlands <sup>6</sup> | 2003–2006 | A multicenter prospective cohort was conducted among adult (severe) burn patients | Injury patients who sustained severe burns | Three public hospitals with specialized burn units. | 311 (response 78%)        |

\*number of patients that met the inclusion criteria; response rate = percentage of patients who responded to the follow-up survey (in case of multiple follow-up times the response rate of the first follow-up moment is reported).

# data from CDC China, jointly analyzed by study authors from IHME and China CDC

MEPS is a large-scale overlapping continuous panel survey of the US non-institutionalized population that collects information on use and cost of health care and SF12 responses [28]. SF-12 responses are elicited twice over the two-year period that any individual is part of the study. Thus, MEPS offered the benefit of including health state measures of non-injured and destined to be injured and the benefit of having pre-injury and post-injury SF-12 responses. We pooled all available MEPS data over a 19-year span.

The follow-up studies used different patient reported outcome measures to assess health status, namely the SF-36, Version 1 SF-12, and the EQ-5D [29-31]. To enable comparison across the six datasets, it was necessary to analyse the data in a standardised patient-reported outcome measure. First, we mapped all patient-reported outcome measures to Version 2 SF-12 (SF-12v2). Second, we normalised the health status measurements by mapping the SF-12 scores to a corresponding disability weight based on several opportunistic surveys asking respondents to score SF-12 based on the lay descriptions for a selection of 60 GBD health states [12]. We ran a regression of logit-transformed disability weight on nature-of-injury category and age group and never-injured status. The pooled dataset informed both the nature-of-injury category hierarchy and the long-term probability of injuries, discussed below.

#### Nature-of-injury category hierarchy

Multiple injuries can occur in one individual. For GBD 2016, a nature-of-injuries severity hierarchy was developed to establish a one-to-one relationship between cause-of-injury and nature-of-injury category. This means that in case of multiple injury the nature-of-injury category that was likely to be responsible for the largest burden was selected. To construct the hierarchy, we used data from the pooled dataset of follow-up studies. The output of the regression of logit-transformed disability weight on nature-of-injury category and individual characteristics of the follow-up studies were used to calculate the mean long-term disability attributable each nature-of-injury category. The ranking of nature-of-injury categories by their long-term disability weights formed the basis of our severity hierarchy. Hierarchies were developed separately, for injuries warranting inpatient care and injuries warranting other health care.

Nature of injury hierarchies: combination of empirical hierarchies estimated from pooled follow-up study and expert adjustments, for inpatient and outpatient injuries

| Rank | Inpatient Hierarchy                  | Outpatient Hierarchy                           |
|------|--------------------------------------|------------------------------------------------|
| 1    | Spinal cord lesion below neck level  | Fracture of pelvis                             |
| 2    | Amputation of lower limbs, bilateral | Fracture of patella, tibia or fibula, or ankle |



|    |                                                                                                                                   |                                                                               |
|----|-----------------------------------------------------------------------------------------------------------------------------------|-------------------------------------------------------------------------------|
| 3  | Amputation of upper limbs, bilateral                                                                                              | Fracture of hip                                                               |
| 4  | Spinal cord lesion at neck level                                                                                                  | Fracture of skull                                                             |
| 5  | Fracture of hip                                                                                                                   | Amputation of thumb                                                           |
| 6  | Fracture of femur, other than femoral neck                                                                                        | Fracture of vertebral column                                                  |
| 7  | Amputation of upper limb, unilateral                                                                                              | Multiple fractures, dislocations, crashes, wounds, sprains, and strains       |
| 8  | Amputation of lower limb, unilateral                                                                                              | Internal hemorrhage in abdomen and pelvis                                     |
| 9  | Multiple fractures, dislocations, crashes, wounds, sprains, and strains                                                           | Fracture of femur, other than femoral neck                                    |
| 10 | Effect of different environmental factors                                                                                         | Dislocation of hip                                                            |
| 11 | Fracture of patella, tibia or fibula, or ankle                                                                                    | Amputation of toe/toes                                                        |
| 12 | Moderate-Severe traumatic brain injury                                                                                            | Fracture of hand (wrist and other distal part of hand)                        |
| 13 | Fracture of foot bones except ankle                                                                                               | Amputation of fingers (excluding thumb)                                       |
| 14 | Internal hemorrhage in abdomen and pelvis                                                                                         | Burns, <20% of total burned surface area without lower airway burns           |
| 15 | Crush injury                                                                                                                      | Dislocation of knee                                                           |
| 16 | Minor traumatic brain injury                                                                                                      | Contusion in any part of the body                                             |
| 17 | Fracture of pelvis                                                                                                                | Minor traumatic brain injury                                                  |
| 18 | Nerve injury                                                                                                                      | Foreign body in respiratory system                                            |
| 19 | Severe chest injury                                                                                                               | Severe chest injury                                                           |
| 20 | Dislocation of hip                                                                                                                | Drowning and nonfatal submersion                                              |
| 21 | Burns, >= 20% total burned surface area or >= 10% burned surface area if head/neck or hands/wrist involved w/o lower airway burns | Asphyxiation                                                                  |
| 22 | Lower airway burns                                                                                                                | Poisoning requiring urgent care                                               |
| 23 | Fracture of skull                                                                                                                 | Effect of different environmental factors                                     |
| 24 | Amputation of thumb                                                                                                               | Foreign body in GI and urogenital system                                      |
| 25 | Fracture of hand (wrist and other distal part of hand)                                                                            | Fracture of sternum and/or fracture of one or more ribs                       |
| 26 | Fracture of vertebral column                                                                                                      | Nerve injury                                                                  |
| 27 | Contusion in any part of the body                                                                                                 | Fracture of face bones                                                        |
| 28 | Open wound(s)                                                                                                                     | Dislocation of shoulder                                                       |
| 29 | Amputation of toe/toes                                                                                                            | Injury to eyes                                                                |
| 30 | Dislocation of knee                                                                                                               | Fracture of clavicle, scapula, or humerus                                     |
| 31 | Amputation of fingers (excluding thumb)                                                                                           | Fracture of radius and/or ulna                                                |
| 32 | Drowning and nonfatal submersion                                                                                                  | Fracture of foot bones except ankle                                           |
| 33 | Asphyxiation                                                                                                                      | Foreign body in ear                                                           |
| 34 | Burns, <20% total burned surface area without lower airway burns                                                                  | Muscle and tendon injuries, including sprains and strains lesser dislocations |
| 35 | Muscle and tendon injuries, including sprains and strains lesser dislocations                                                     | Superficial injury of any part of the body                                    |
| 36 | Fracture of face bones                                                                                                            | Open wound(s)                                                                 |
| 37 | Foreign body in respiratory system                                                                                                | Complications following therapeutic procedures                                |
| 38 | Poisoning requiring urgent care                                                                                                   |                                                                               |
| 39 | Foreign body in GI and urogenital system                                                                                          |                                                                               |
| 40 | Fracture of sternum and/or fracture of one or more ribs                                                                           |                                                                               |
| 41 | Dislocation of shoulder                                                                                                           |                                                                               |

|    |                                                |  |
|----|------------------------------------------------|--|
| 42 | Injury to eyes                                 |  |
| 43 | Fracture of clavicle, scapula, or humerus      |  |
| 44 | Fracture of radius and/or ulna                 |  |
| 45 | Foreign body in ear                            |  |
| 46 | Superficial injury of any part of the body     |  |
| 47 | Complications following therapeutic procedures |  |

### Cause-nature matrices

Due to the fact that injury disability is linked more to nature-of-injury than to cause-of-injury, matrices were generated to map the proportion of each cause-of-injury category that results in a particular nature-of-injury category. These matrices are based on a collection of dual-coded (eg, both cause-of-injury and nature-of-injury coded) hospital and emergency department datasets. The data for this step came from inpatient, outpatient, and emergency room discharge data from Argentina, Bulgaria, China, Colombia, Cyprus, the Czech Republic, Denmark, Egypt, Estonia, Hungary, Iceland, Iran, Italy, Latvia, Malta, Mauritius, Mexico, Mozambique, the Netherlands, Norway, Portugal, Slovenia, Spain, Sweden, Macedonia, Uganda, US, and Zambia. We applied our nature-of-injury severity hierarchy above to assert that every observation had one cause-of-injury and one nature-of-injury.

In GBD 2015, negative binomial models were used to estimate the probability of each nature-of-injury category resulting from each cause-of-injury category. For GBD 2016, Dirichlet models were used instead in order to estimate all of the nature-of-injury category proportions for one cause-of-injury simultaneously. These models allow for more consistent borrowing of information across age, sex, inpatient/outpatient, and high/low-income countries, and assert that the nature-of-injury proportions within a cause-of-injury category must add up to 1. One cause-nature matrix was created for each combination of injury warranting hospital admission versus injury warranting other health care, high/low-income countries, male/female, and age category. Applying these matrices to our cause-of-injury incidence from DisMod-MR, we produced cases of injury warranting hospital admission and incidence of injury warranting other health care by cause and nature of injury.

### Probability of permanent health loss

Disability due to injury was assumed to affect all cases in the short term with a proportion having long-term (permanent) outcomes. The probability of long-term outcomes was needed to estimate the incidence and subsequently the prevalence of cases with permanent health loss. In our conceptual model, individuals who suffer a non-fatal injury will, in the long-term, return to either full or partial health. If one-year post-injury patients return to a health status with more disability than their pre-injury health status, injury patients are assumed to have permanent disability from their injury. The difference between the pre-injury health states and health status one year after injury is assumed to be their permanent level of injury-related disability. We assessed the probability of developing permanent health loss using the pooled dataset of follow-up studies and the Medical Expenditure Panel Survey (MEPS) that were also used to generate the nature-of-injury hierarchy. To assess the probability of permanent health loss we estimated the effects using a logit-linear mixed effects regression:

$$\begin{aligned}
 \text{Logit}(DW)_{im} = & \alpha + \beta(\text{injuries}_{im}) + \beta(\text{never injured}_i) + \beta(\text{never injured}_i * \text{age}_i) \\
 & + \beta(\text{fracture of pelvis}_i) + \beta(\text{fracture of pelvis}_i * \text{age}_i) + \beta(\text{poisoning}_i * \text{age}_i) \\
 & + \beta(\text{moderate to severe TBI}_i * \text{age}_i) + RE_c + RE_i
 \end{aligned}$$

where we included dummies for all the nature-of-injury categories ( $injuries_{im}$ ), with the reference category being no injury (from MEPS dataset). We also include a dummy for never injured prior to the current injury, age, interactions between age and never injured status, and interactions with three long-term nature-of-injury categories that were found to significantly vary with age: pelvis fractures, poisonings, and moderate/severe traumatic brain injuries. In notation, subscript  $m$  refers to patient-reported outcome measure,  $i$  refers to individual and  $c$  refers to country. Random effects (RE) were included to control for variation between countries and individuals.

After predicting overall disability at one-year follow-up, we estimated a counterfactual by setting all observations to “no injury,” the reference group for  $\beta(injuries_{im})$  in our model. The disability attributable to the nature-of-injury at one year was assumed to be the difference between our counterfactual of no injury and predicted disability with injury. The probability of treated long-term outcomes was estimated via the ratio of this attributable disability relative to the long-term disability weight for that injury.

$$Probability\ of\ long - term\ disability = \frac{with\ injury\ disability_{im} - counterfactual\ disability_{im}}{DW_m}$$

We developed estimates of the probability of permanent health loss by nature-of-injury category, injury severity level (injuries warranting inpatient admission and injuries warranting other health care) and age. These probabilities are shown in Figure X for three selected age groups (25-30, 50-55, 75-80), and selected nature-of-injury categories by inpatient and outpatient. Moderate-severe TBI and spinal cord lesions only have inpatient injury long-term probabilities, and nerve injury, open wounds, and severe chest injury have long-term probabilities of 0 for outpatient cases.

**Figure X.** Long-term probabilities derived from the MEPS data for selected nature of injuries and age groups

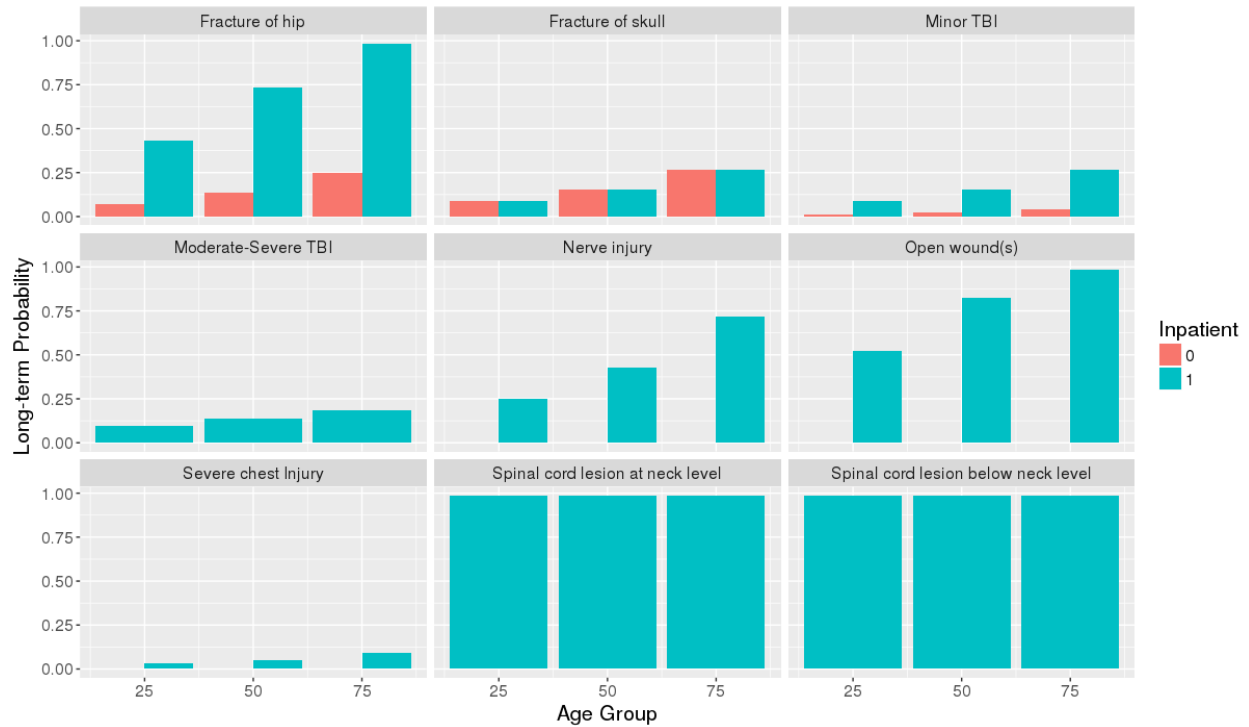

### Disability associated with treated and untreated cases

For many nature-of-injury categories GBD 2016 has a separate disability weight for treated and for untreated cases [14]. To estimate the percent treated for injuries in a given location-year, we used the HAQ Index with the same strategy described for the probability of permanent health loss. In GBD 2015, we used a proxy covariate that defined health system access (HSA) based on a combination of vaccination rates, proportion of deliveries by a skilled birth attendant, in-facility birth, and antenatal care. We used this to estimate the ratio of treated to untreated injuries for each country-year grouping and assigned a location-year-specific disability weight equal to a weighted average of the treated and untreated disability weights for each nature-of-injury category/severity-level grouping. We assumed that all locations had at least 10% of all injuries treated and capped the maximum HSA value at the lowest HSA value for an OECD country in a given year. This OECD HSA value for 2015 was used to scale all other location-years between 10% and 100% treated based on their HSA value.

In GBD 2016, we changed this method significantly. Instead of using the HSA covariate, we use the Healthcare Access and Quality (HAQ) Index. The HAQ Index better reflects access to care related to injury treatment rather than to maternal and child healthcare. We did not assert that all OECD countries had the same value, but rather chose a reasonable cutoff for the HAQ Index (75 on a scale of 0 – 100) as the threshold at and above which 100% of injuries were treated. This value captured most OECD countries for all years back to 1980, rather than just the most recent year. We then scaled all remaining location-years between 10% and 100% treated based on their HAQ Index value and used that as the percent treated in a given location-year. This was done at the draw level to propagate uncertainty. Similar to GBD 2015, we made the decision to ignore any long-term disability from outpatient injuries from open wound, poisoning, and contusion because of implausibly high estimates of long-term disability.

### Duration of short-term health loss

To determine the duration for treated cases of short-term injury we analyzed patient responses of two Dutch Injury Surveillance System follow-up studies of 2001–2003 and 2007–2009 [20, 21]. These studies collected data at 2.5, 5, 9, and 12 months post-injury on whether injury patients were still experiencing problems due to their injury [20, 21]. If not, the patients were asked how many days they had experienced problems. The injury patients that still reported having problems one year after the injury were assumed to be captured in our analysis of permanent disability. The duration for treated cases of short-term injury was estimated for injuries warranting inpatient admission and injuries warranting other health care separately. The estimates were supplemented by expert-driven estimates of short-term duration for nature of injury categories that did not appear in the Dutch dataset and untreated injuries.

### Calculation of prevalence from incidence data – short-term injury

For short-term injury outcomes, which were assumed to be less than one year in duration, the prevalence for each cause-of-injury/nature-of-injury/severity-level grouping was approximated by the incidence for that grouping multiplied by the associated nature-of-injury/severity-level-specific duration.

### Calculation of prevalence from incidence data – permanent health loss

For permanent health loss, we assumed no remission and thus integrated incidence over time to arrive at prevalence estimates. We used DisMod ODE (ie, the “engine” of DisMod-MR 2.1) to carry out this integration for each combination of cause of injury and nature of injury by country year and sex. For this step we used random effects meta-analysis to pool data on standardized mortality ratios derived from literature reviews for spinal cord injury, burns covering more than 20% of the body, moderate to severe traumatic brain injury, hip fracture, and multiple significant injuries (see for more detail [12]). Here we include examples of these meta-analyses: hip fractures and traumatic brain injuries.

**Figure XX.** Meta-analyses of standardized mortality ratios derived from literature reviews: hip fractures and traumatic brain injury.

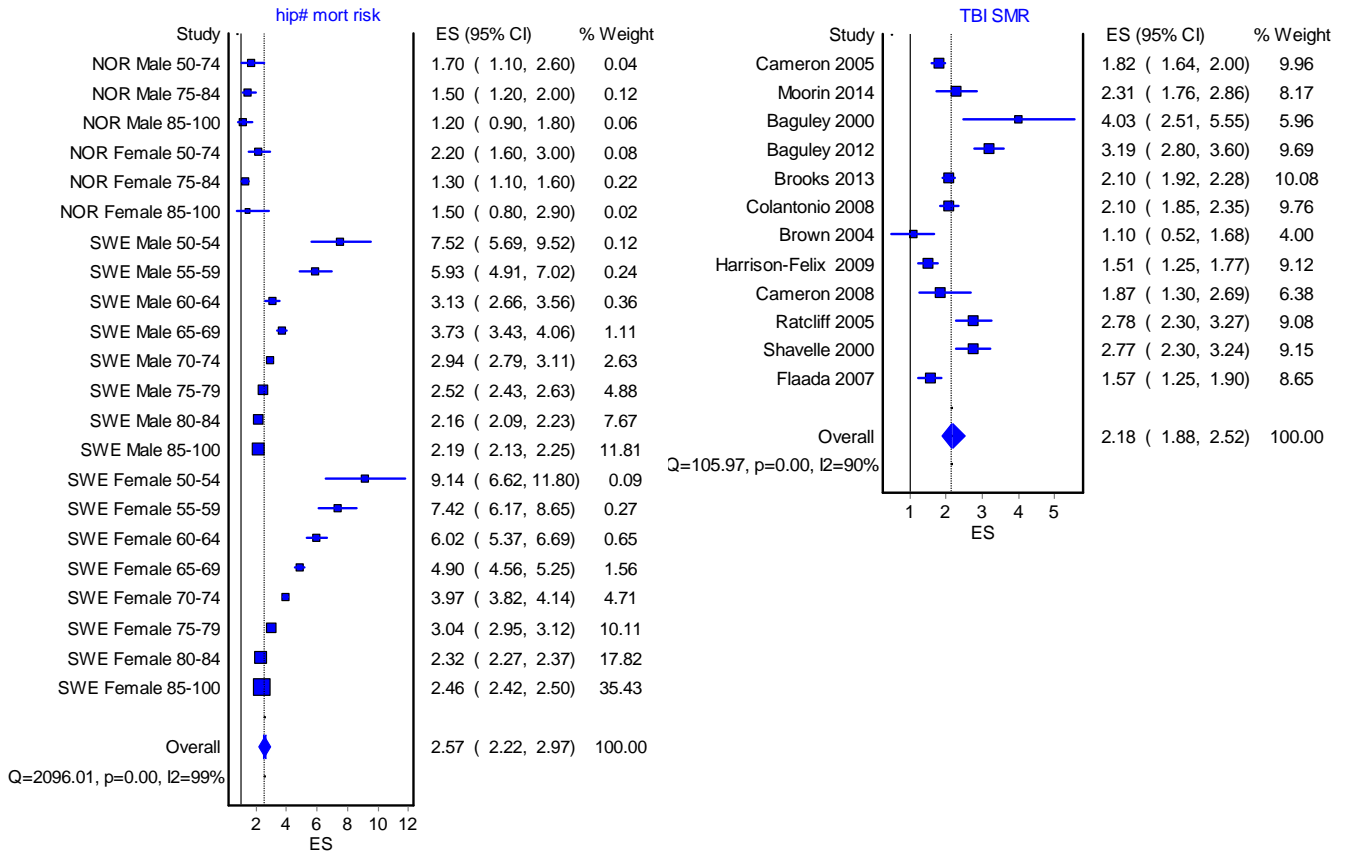

For all other nature-of-injury categories, we assumed no long-term excess mortality. For the incidence estimates derived from fatal discontinuities – “exposure to forces of nature,” and “conflict and terrorism” – we did not use DisMod as discontinuities by definition violate the assumption of a steady state in DisMod to estimate prevalence from incidence. For these two cause-of-injury categories, we coded the differential equations from DisMod ODE that determine the relationship between incidence, remission, mortality risk, and prevalence into Python and streamed out the prevalence from the incidence in the years of war or disaster by integrating over one year at a time.

No other significant changes were made to the injuries modelling process for GBD 2016.

# Sexual Violence

## Flowchart

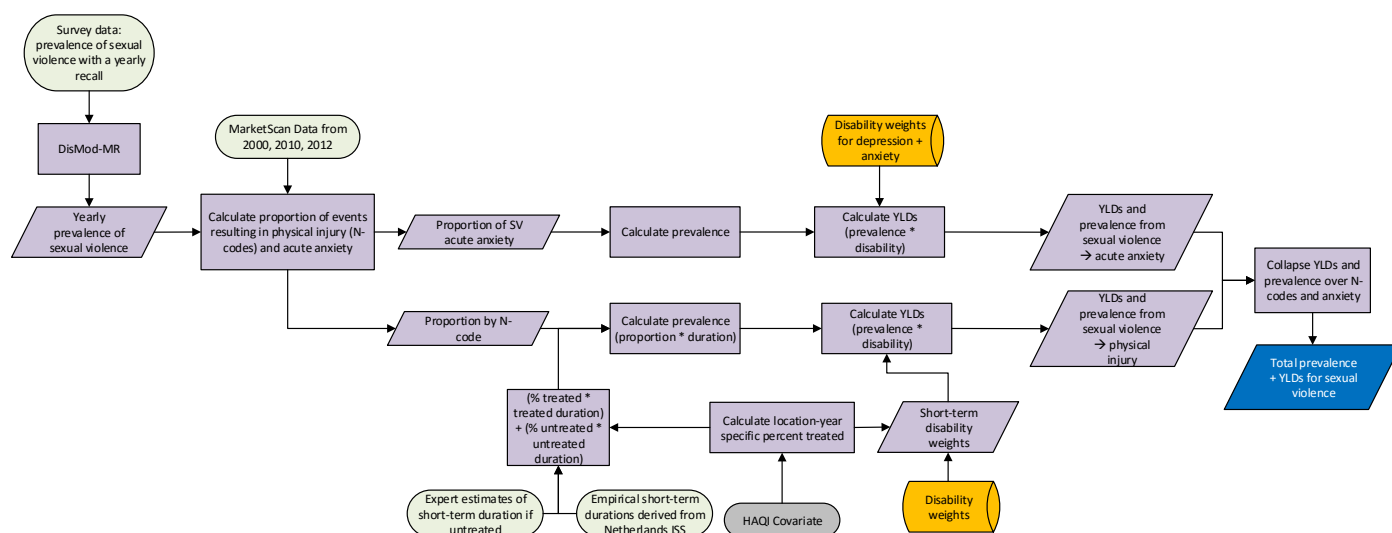

## Case definition

Sexual violence is a new cause for GBD 2016. We estimate the yearly prevalence of sexual violence, ie, the proportion of the population that experienced at least one event of sexual violence in the last year. We define sexual violence as any sexual assault, including both penetrative sexual violence (rape) and non-penetrative sexual violence (other forms of unwanted sexual touching).

## Input data

### Model inputs

The majority of the data for sexual violence comes from various health and demographic surveys. We include many Demographic and Health Surveys (DHS) and Reproductive Health Surveys (RHS). Other survey series include the US Behavioral Risk Factor Surveillance Survey (BRFSS), the British Crime Surveys. Table 1 shows the number of unique location-sources for prevalence of sexual violence with a yearly recall that we used in the DisMod models.

**Table 1.** Unique location-sources for data on sexual violence yearly prevalence used in the DisMod model by Global Burden of Disease super-region.

| Super-region name                                | Unique number of sources |
|--------------------------------------------------|--------------------------|
| Southeast Asia, East Asia, and Oceania           | 10                       |
| Central Europe, Eastern Europe, and Central Asia | 23                       |
| High-income                                      | 55                       |
| Latin America and Caribbean                      | 26                       |
| North Africa and Middle East                     | 7                        |
| South Asia                                       | 91                       |
| Sub-Saharan Africa                               | 46                       |

Many other non-survey data sources exist for sexual violence. We explored the use of the United Nations Office on Drugs and Crime (UNODC) Statistics [TBD] that covers a wide range of geographies from 2003 to 2014. However, these estimates are based only on police reports, and their incidence is about 20 times lower than the incidence seen in the same location-years from survey data. Although we could include a covariate in our models to adjust for this underreporting, we deemed the source unusable because of the magnitude of the difference between the police reports and survey data. Survey data typically range between 1% and 10% of individuals experiencing sexual violence in the last year. Figure 1 shows the incidence estimates from the UNODC data, where most of the estimates are below about 0.05%. The geographic pattern is the opposite of what we see in survey data, with higher-income countries having higher estimates in the UNODC data. Additionally, the reports were not age-sex-specific, and the definition for what constitutes sexual violence varies across countries.

We also chose not to include the Centers for Disease Control non-fatal injury reports of sexual violence. Although this data source includes age- and sex-specific estimates for sexual violence in the United States, only sexual violence cases which resulted in physical injury are reported. These estimates are also systematically lower than the survey data, to the degree at which any adjustment with covariates would be unreliable. Lastly, we excluded a source from the United States Federal Bureau of Investigation: The Uniform Crime Reporting (UCR) program. The FBI estimates are produced at the state level for the United States, and are meant to be comparable across states. However, police report data for sexual violence are systematically lower, similar in magnitude to the UNODC data, so we chose to exclude it.

**Figure 1.** United Nations Office of Drugs and Crime Statistics: estimates of sexual violence (incidence per person), color by Global Burden of Disease super-regions.

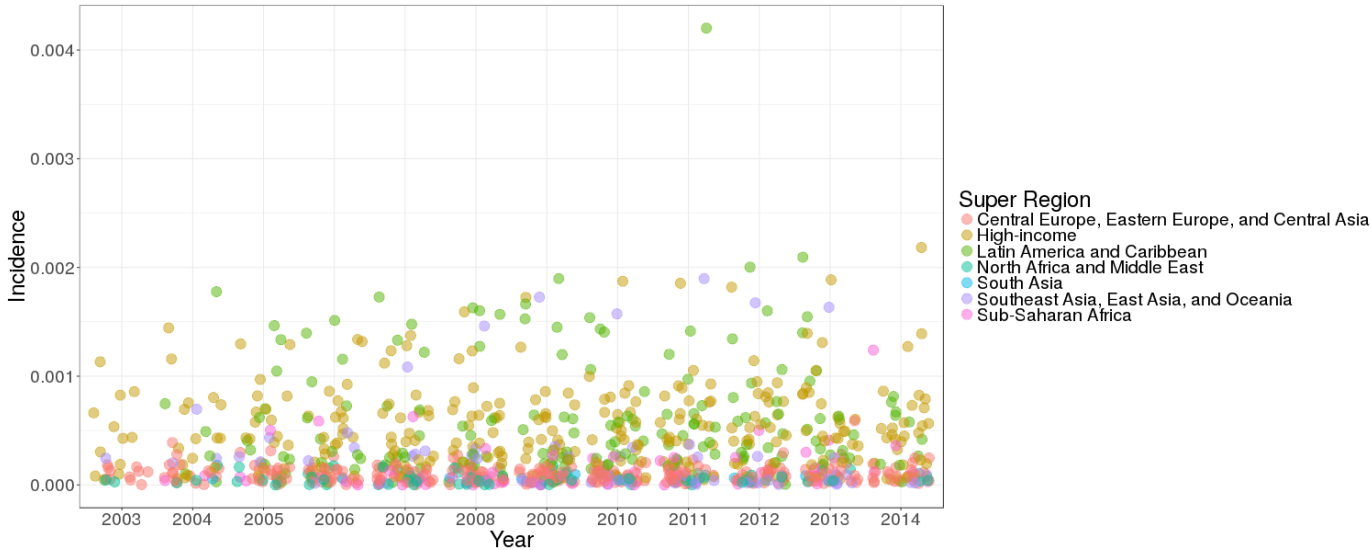

*Data searches*

To find large data sources for sexual violence, we searched through the Global Health Data Exchange (GHDx) to identify survey series with relevant questions, and reviewed surveys that were being used for intimate partner violence (IPV) already. We identified 107 sources with relevant data that were being



used for IPV, and 33 additional surveys with sexual violence questions. We excluded sources that only asked about lifetime prevalence of sexual violence because our case definition is specific to the past year. We extracted data on the perpetrator of sexual violence where possible (partner versus non-partner).

We completed a systematic review in PubMed to identify additional sources. We identified 415 sources and excluded 314 based on title/abstract screening. Of the 111 sources remaining after title/abstract screening, 84 did not have usable data, were of non-representative samples, or referenced data that was already being captured from the GHDx. Samples were non-representative if they were only taken among high-risk populations (war-afflicted, sex workers, intravenous drug users, etc.), sexually abused individuals, or women suffering intimate partner violence. We also excluded studies that only asked about sexual violence in the context of alcohol. After full-text screening, 18 sources remained, only two of which had yearly recall prevalence.

## Modelling strategy

### Prevalence of sexual violence

To produce estimates of the yearly prevalence of sexual violence, we used DisMod-MR 2.0. DisMod-MR 2.0 is a descriptive epidemiological meta-regression tool that uses the integrative systems modelling approach to produce simultaneous estimates of disease incidence, prevalence, remission, and mortality. To preserve variation between male- and female-specific estimates, we have separate models for men and women.

We make various assumptions within DisMod-MR 2.0 including no excess mortality due to sexual violence and no incidence between 0–2 and 98–100 years of age. Because of the different ways that questions about sexual violence in the last year can be asked, we include multiple study-level covariates (for coefficient estimates, see Table 2). We bounded the covariates at logical values to minimize the effect of collinearity between the covariates, ie, we expect studies that ask about penetrative sexual violence only to have lower estimates of sexual violence overall, so that covariate has an upper bound of 1.

**Table 2.** Study- and country-level covariates for DisMod-MR 2.0 yearly recall prevalence models for sexual violence.

| Covariate                                                | Covariate Bounds | Exponentiated Value |
|----------------------------------------------------------|------------------|---------------------|
| <i>Study-level covariates</i>                            |                  |                     |
| Physically forced sexual violence only                   | Upper: 1         | 0.94 (0.82 – 1.00)  |
| Ever-partnered people only                               | None             | 1.49 (1.16 – 2.01)  |
| Ever-married people only                                 | None             | 2.19 (1.53 – 2.97)  |
| Specifies specifically degrading or humiliating sex acts | Upper: 1         | 0.96 (0.87 – 1.00)  |
| Ever had sex                                             | None             | 1.23 (1.09 – 1.42)  |
| Ever married or lived with a partner                     | None             | 1.44 (1.15 – 1.93)  |
| Does not include coerced or feared sex in definition     | Upper: 1         | 0.94 (0.84 – 1.00)  |
| Penetrative sexual violence only                         | Upper: 1         | 0.66 (0.56 – 0.75)  |

|                                              |          |                     |
|----------------------------------------------|----------|---------------------|
| Does not include non-partner non-penetrative | Upper: 1 | 0.99 (0.97 – 1.00)  |
| Only includes partner sexual violence        | Upper: 1 | 0.85 (0.65 – 0.99)  |
| Includes attempted sexual violence           | Lower: 1 | 1.36 (1.04 – 1.97)  |
| <b><i>Country-level covariates</i></b>       |          |                     |
| Alcohol (liters per capita)                  |          | 1.00 (0.37 – 2.72)  |
| Socio-demographic Index                      |          | 0.12 (0.088 – 0.16) |

### Years lived with disability (YLDs) due to sexual violence

In our calculations of years lived with disability due to sexual violence, for GBD 2016 we are only considering the short-term physical and psychological effects of sexual violence. In future GBD iterations, we will be including sexual violence as a risk factor including both sexual violence in the last year and lifetime exposure to sexual violence (independent from, and in interaction with, intimate partner violence). Including sexual violence as a risk will allow us to capture the long-term mental health consequences of sexual violence, which we are unable to capture just considering past yearly recall of sexual violence and its consequences for up to one year.

To calculate the years lived with disability (YLDs) due to having experienced sexual violence in the past year, we utilize claims data from the United States from the years 2000, 2010, and 2012 to assess sexual violence sequelae. We search through the claims database for the following ICD9 diagnosis codes: 995.53 (child sexual abuse), 995.83 (adult sexual abuse), and E960.1 (rape). We considered sequelae relating to both physical injuries and mental health consequences, in the short-term.

#### *Physical injury*

For the physical injury sequelae, we looked for any nature-of-injury ICD9 code on the same date of contact with medical service providers for a sexual violence ICD9 code (above), and categorized the nature-of-injury codes as we do for the general injuries nonfatal modeling process (see appendix: nonfatal injuries). We calculate the proportion of individuals with any sexual violence code that result in each of the physical injuries categories. This strategy is similar to the strategy that we use for the cause-nature of injury matrices in the general injuries modeling process, but we have an additional category for no physical injury result, since the majority of sexual violence incidents do not result in physical injury in the claims database. Additionally, since we only have one data source, we do not model these proportions with Dirichlet regression like we do for the injuries cause-nature of injury matrices, but just compute them directly from the claims data. To estimate the physical injuries component of YLDs, we multiply the DisMod estimates of yearly prevalence of sexual violence by these proportions and then multiply by each physical injuries' respective short-term duration and disability weight that we use in the general injuries process (see appendix: nonfatal injuries).

#### *Acute anxiety and/or reaction to stress*

For the mental and psychological sequelae of sexual violence, we searched an individual being coded to any of the following ICD9 codes at any point *after* a sexual violence incident was noted. The codes are meant to reflect conditions relating to an “acute anxiety and/or reaction to stress” condition following a traumatic incident, displayed in Table 2.

**Table 2.** ICD9 codes included in the “acute anxiety and/or reaction to stress” condition as a sequela for sexual violence.

| ICD9 Code | Condition Description                                                     |
|-----------|---------------------------------------------------------------------------|
| 308       | Acute reaction to stress                                                  |
| 308       | Predominant disturbance of emotions                                       |
| 308.1     | Predominant disturbance of consciousness                                  |
| 308.2     | Predominant psychomotor disturbance                                       |
| 308.3     | Other acute reactions to stress                                           |
| 308.4     | Mixed disorders as reaction to stress                                     |
| 308.9     | Unspecified acute reaction to stress                                      |
| 309       | Adjustment reaction                                                       |
| 309       | Adjustment disorder with depressed mood                                   |
| 309.1     | Prolonged depressive reaction                                             |
| 309.2     | Adjustment reaction with predominant disturbance of other emotions        |
| 309.21    | Separation anxiety disorder                                               |
| 309.22    | Emancipation disorder of adolescence and early adult life                 |
| 309.23    | Specific academic or work inhibition                                      |
| 309.24    | Adjustment disorder with anxiety                                          |
| 309.28    | Adjustment disorder with mixed anxiety and depressed mood                 |
| 309.29    | Other adjustment reactions with predominant disturbance of other emotions |
| 309.3     | Adjustment disorder with disturbance of conduct                           |
| 309.4     | Adjustment disorder with mixed disturbance of emotions and conduct        |
| 309.8     | Other specified adjustment reactions                                      |
| 309.81    | Posttraumatic stress disorder                                             |
| 309.82    | Adjustment reaction with physical symptoms                                |
| 309.83    | Adjustment reaction with withdrawal                                       |
| 309.89    | Other specified adjustment reactions                                      |
| 309.9     | Unspecified adjustment reaction                                           |

It is possible that the appearance of one of these ICD9 codes is entirely unrelated to the sexual violence incident. Additionally, the appearance of one of these codes could be related instead to underlying depression and anxiety. To control for these confounding factors, we also searched for these ICD9 codes among individuals that were not victims of sexual violence in the past year. We used Poisson regression with robust standard errors to model the relative risk of the “acute anxiety and/or reaction to stress” comparing individuals with and without sexual violence within the year, controlling for underlying diagnoses of depression and anxiety constant:

$$\log(\lambda) = \beta_0 + \beta_1(\text{sexual violence}) + \beta_2(\text{depression}) + \beta_3(\text{anxiety}) + \beta_4(\text{female}) + \beta_5(\text{age})$$

where  $\lambda$  is the risk of “acute anxiety and/or reaction to stress,” and  $e^{\beta_1}$  is the relative risk of “acute anxiety and/or reaction to stress” comparing those experiencing at least one sexual violence incident to those with no sexual violence incidence, holding underlying depression, anxiety, sex, and age constant.

We can approximate the risk of “acute anxiety and/or reaction to stress” for each age and sex experiencing sexual violence by:

$$\lambda_{age,sex} = e^{\beta_1} * (e^{\beta_0} * e^{sex*\beta_4+age*\beta_5}) - (e^{\beta_0} * e^{sex*\beta_4+age*\beta_5})$$

The claims data had n = 70,6707,63 observations (n = 8,331 sexual violence cases). Using the equation above, the transformed coefficients and transformed robust standard errors (transformations were performed with the Delta method) are shown in Table 3.

**Table 3.** Estimates of the risk of “acute anxiety and/or reaction to stress” ( $\lambda_{age,sex}$ ) among people experiencing sexual violence over a year time-period, specific to age and sex.

| Age | Male     |                | Female   |                |
|-----|----------|----------------|----------|----------------|
|     | Estimate | Standard error | Estimate | Standard error |
| 0   | 0.0967   | 0.0023         | 0.1205   | 0.0028         |
| 5   | 0.0933   | 0.0021         | 0.1162   | 0.0027         |
| 10  | 0.0899   | 0.0021         | 0.1120   | 0.0026         |
| 15  | 0.0867   | 0.0020         | 0.1080   | 0.0025         |
| 20  | 0.0836   | 0.0020         | 0.1042   | 0.0024         |
| 25  | 0.0806   | 0.0019         | 0.1004   | 0.0024         |
| 30  | 0.0777   | 0.0018         | 0.0968   | 0.0023         |
| 35  | 0.0749   | 0.0018         | 0.0934   | 0.0022         |
| 40  | 0.0722   | 0.0017         | 0.0900   | 0.0021         |
| 45  | 0.0697   | 0.0016         | 0.0868   | 0.0020         |
| 50  | 0.0672   | 0.0016         | 0.0837   | 0.0020         |
| 55  | 0.0648   | 0.0015         | 0.0807   | 0.0019         |
| 60  | 0.0624   | 0.0015         | 0.0778   | 0.0018         |
| 65  | 0.0602   | 0.0014         | 0.0750   | 0.0018         |
| 70  | 0.0581   | 0.0014         | 0.0723   | 0.0017         |
| 75  | 0.0560   | 0.0013         | 0.0697   | 0.0016         |
| 80  | 0.0540   | 0.0013         | 0.0672   | 0.0016         |
| 85  | 0.0520   | 0.0012         | 0.0648   | 0.0015         |
| 90  | 0.0502   | 0.0012         | 0.0625   | 0.0015         |
| 95  | 0.0484   | 0.0011         | 0.0603   | 0.0014         |

We multiplied the prevalence of yearly sexual violence by  $\lambda_{age,sex}$  to get the prevalence of “acute anxiety and/or reaction to stress” due exclusively to sexual violence. To estimate YLDs for this sexual violence sequela, we used the average of the disability weights for mild depression and anxiety. For simplicity, we assume a duration of one year, thus the YLDs for the mental and psychological stress component of sexual violence is the product of the residual probability of “acute anxiety and/or reaction to stress” and the disability weight.

# Anemia Impairment

## Flowchart

### Anemia Impairment Estimation

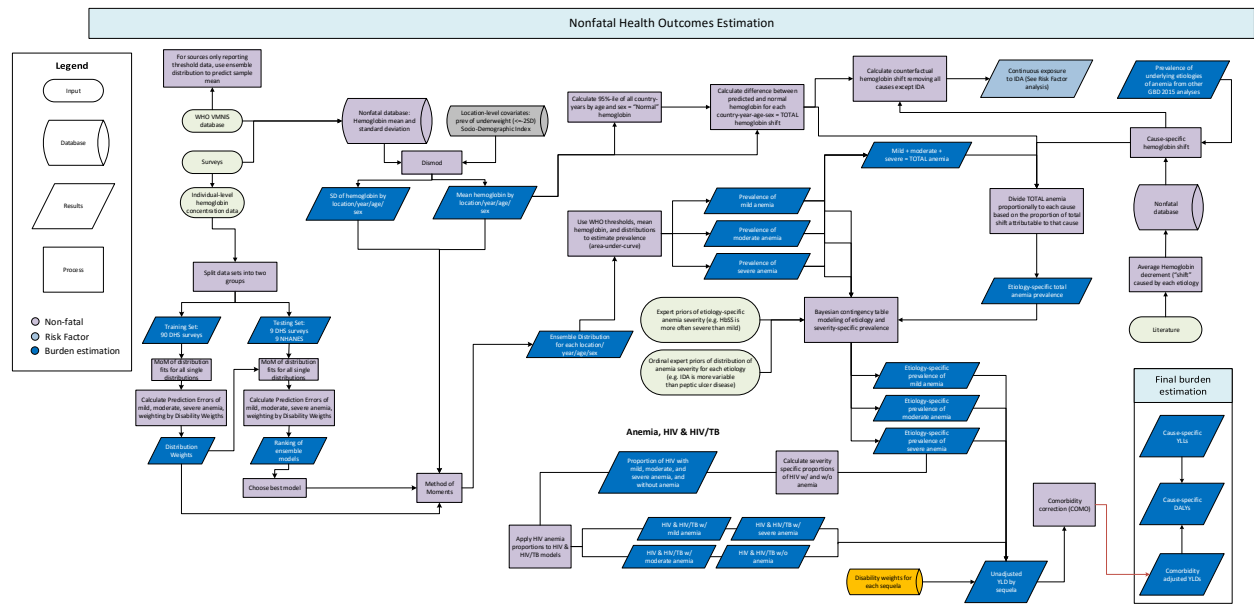

### Input data and methodological summary

#### Case definition

The prevalence of anemia is defined by the following WHO thresholds for hemoglobin in g/L.

| Severity definitions used to calculate GBD 2016 anemia envelope |                    |              |          |
|-----------------------------------------------------------------|--------------------|--------------|----------|
|                                                                 | Severity of anemia |              |          |
|                                                                 | Mild               | Moderate     | Severe   |
| <b>Age &lt; 1 month</b>                                         |                    |              |          |
| Males                                                           | 130 - 149 g/L      | 90 - 129 g/L | < 90 g/L |
| Females                                                         | 130 - 149 g/L      | 90 - 129 g/L | < 90 g/L |
| <b>Age 1 month - 5 years</b>                                    |                    |              |          |
| Males                                                           | 100 - 109 g/L      | 70 - 99 g/L  | < 70 g/L |
| Females                                                         | 100 - 109 g/L      | 70 - 99 g/L  | < 70 g/L |
| <b>Age 5 - 14 years</b>                                         |                    |              |          |
| Males                                                           | 110 - 114 g/L      | 70 - 99 g/L  | < 70 g/L |
| Females                                                         | 110 - 114 g/L      | 70 - 99 g/L  | < 70 g/L |

| Age 15+ years         |               |              |          |
|-----------------------|---------------|--------------|----------|
| Males                 | 110 – 129 g/L | 80 - 109 g/L | < 80 g/L |
| Females, non-pregnant | 110 - 119 g/L | 80 - 109 g/L | < 80 g/L |
| Females, pregnant     | 100 – 109 g/L | 70 - 99 g/L  | < 70 g/L |

## Modelling Strategy Summary:

As with GBD 2015, the anemia model has two main steps: estimation of the anemia envelope and causal attribution. The envelope approach utilizes the main source of anemia data – population mean hemoglobin and prevalence of all-cause anemia – to estimate the overall prevalence of anemia impairment. The causal attribution assigns all cases of anemia to a specific cause and severity in an internally consistent method.

## Input data

### *Model inputs*

The envelope approach to the anemia impairment utilizes data from a variety of sources. Population-based surveys of hemoglobin concentration were the primary input to our analytic dataset. Examples include the Demographic and Health Survey (DHS) and Multiple Indicator Cluster Survey (MICS) series, along with other national and subnational surveys that completed hemoglobin testing. We supplemented with pertinent sources downloaded from the WHO Vitamin and Mineral Nutrition Information System (VMNIS) available at <http://www.who.int/vmnis/database/anaemia/countries/en/>. A full source list is available elsewhere in this appendix. Most used a HemoCue test, adjusted for altitude, and excluded those with terminal or acute medical conditions. Inclusion, exclusion and diagnostic criteria for other studies were similar and can be found in each study.

## Modelling strategy

### Anemia Impairment Envelope

- 1) Estimation of population mean and standard deviation of hemoglobin

We ran two Dismod-MR models – one for mean hemoglobin and one for standard deviation of hemoglobin. In both models, we included fixed effects on pregnancy status, underweight (proportion of children under 5 <2SD weight for age), and sociodemographic index (SDI). A z-cov was used for studies not representative of the location modelled. Mean-hemoglobin was used as a fixed effect in the standard deviation model.

- 2) Estimation of prevalence of anemia by severity

We modelled the full distribution of hemoglobin for each population (location/age/year/sex), from which we applied the WHO thresholds to calculate prevalence of each severity of anemia. In GBD 2015, a Weibull distribution was fit using shape and scale parameters estimated from mean hemoglobin. For GBD 2016, we combine multiple two-parameter distributions to create a more precise and unbiased ensemble distribution.

First, we created a training and testing set of individual-level hemoglobin measurements. The training set consisted of 90 DHS surveys, providing 290 group-specific samples of microdata from children

<5, males 15-45, pregnant females 15-45, and non-pregnant females 15-45 (not all groups were sampled in each DHS). A set of two-parameter distributions (gamma, mirror gamma, Weibull, mirror lognormal, and mirror gumbel) were fit to the sample's hemoglobin mean and variance. These distributions were combined using weights optimized by a loss function of severity-specific prediction error weighted by the ratio of the severity's disability weight (DW) to mild anemia DW. Weights were constrained to be positive and sum to 1, so that the resultant ensemble distribution is a proper probability density function. All permutations of the 5 distributions were tested (ie, we optimized weights for both a mix of all 5 distributions as well as a gamma-weibull two-way combination).

The loss function is

$$\sum_{i=1}^{n_i} \sum_{j=1}^{n_j} \sum_{k=1}^{n_k} r_j |p_{ijk} - \hat{p}_{ijk}|$$

Where

$$\hat{p}_{ijk} = \sum_{z=1}^{n_z} w_z \int_{t1_{jk}}^{t2_{jk}} PDF_{ijz}$$

$n_i$  is a list of surveys (in either the training or testing set)

$n_j$  is the list of groups: children <5, males 15-45, pregnant females 15-45, non-pregnant females 15-45, males >45, and females >45

$n_k$  is the list of severities (mild, moderate, severe)

$n_z$  is the list of distributions (gamma, mirror gamma, Weibull, mirror lognormal, and mirror gumbel)

$r$  is the ratio of the severity  $j$  disability weight to that of mild anemia

$$r_k = 13 \text{ for moderate and } r_k = 40 \text{ for severe}$$

$PDF$  is a probability density function fit to the sample mean and variance

$t1$  and  $t2$  are the lower and upper bounds to the WHO anemia definition for the group

$w$  is the set of distribution weights (each constrained to be positive) such that

$$\sum_{z=1}^{n_z} w_z = 1 \text{ and all } w_z > 0$$

Therefore  $\sum_{z=1}^{n_z} w_z * PDF_z$  describes the ensemble probability density function that can be integrated to calculate prevalence for any severity

The testing set consisted of 9 NHANES and 9 DHS surveys not included in the training data. Inclusion of NHANES as half the testing set ensured out of sample predictive validity by challenging the global weights, as it provided the ensemble distribution with high-income data (DHS is from LMIC countries) and data from adults >45 (DHS did not take blood tests from the elderly). We selected the

combination of distributions (including all individual component distributions) that minimized the loss function.

With a set of component distributions and global weights, we then modelled the distribution of hemoglobin in each location/year/age/sex by fitting each component distribution using modelled mean and standard deviation, then weighting to create the ensemble distribution  $\sum_{z=1}^{n_z} w_z * PDF_z$ . We integrated area under the curve for each group-specific WHO threshold to calculate prevalence of anemia by severity.

Because anemia thresholds depend on pregnancy, we separately modelled the distribution of pregnant and non-pregnant females. The method for fitting the ensemble distribution to pregnant women was identical to that of non-pregnant, but used the mean and variance from the two Dismod models adjusted by the estimated beta on the pregnancy status fixed effect. The prevalence of anemia in pregnant and non-pregnant women were weighted by the pregnancy rate and combined to estimate population prevalence of anemia. The pregnancy rate for each age is estimated as

$$pregnancy = (ASFR + SB) * 46/52$$

Where

*ASFR* is the location- and age-specific fertility rate

*SB* is the location-specific stillbirth rate

SHOULD I MENTION THAT IT'S JUST GAMMA AND MIRROR GUMBEL?

Below are some examples of the hemoglobin distributions for various locations and groups, combining the sample distribution (histogram), individual distributions, and ensemble distribution.

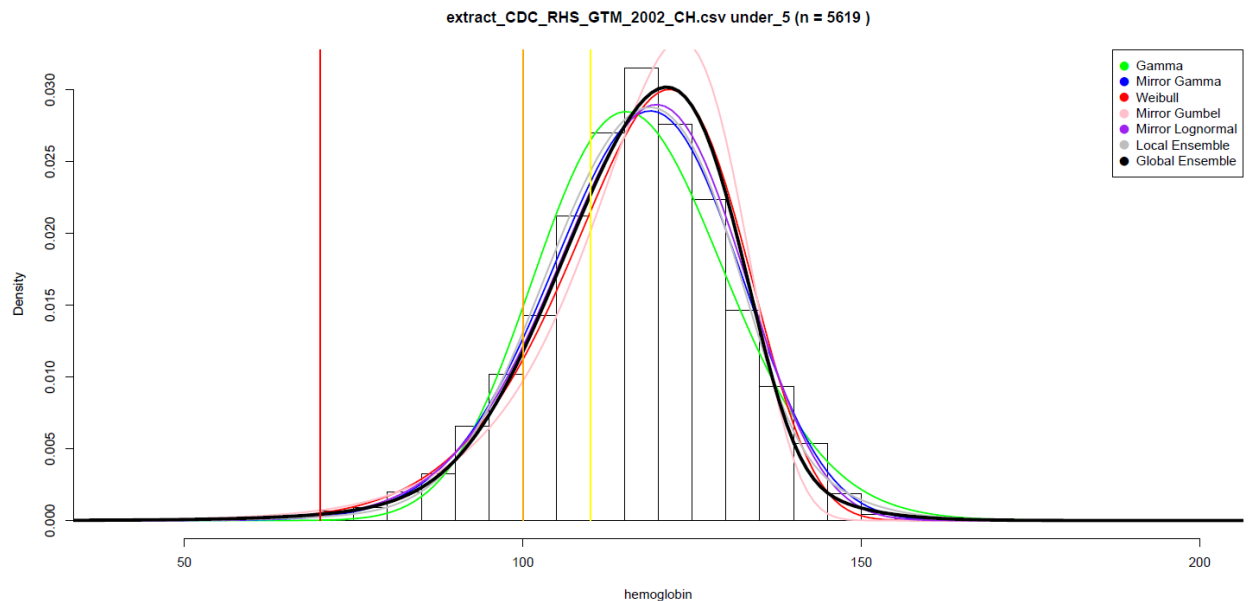



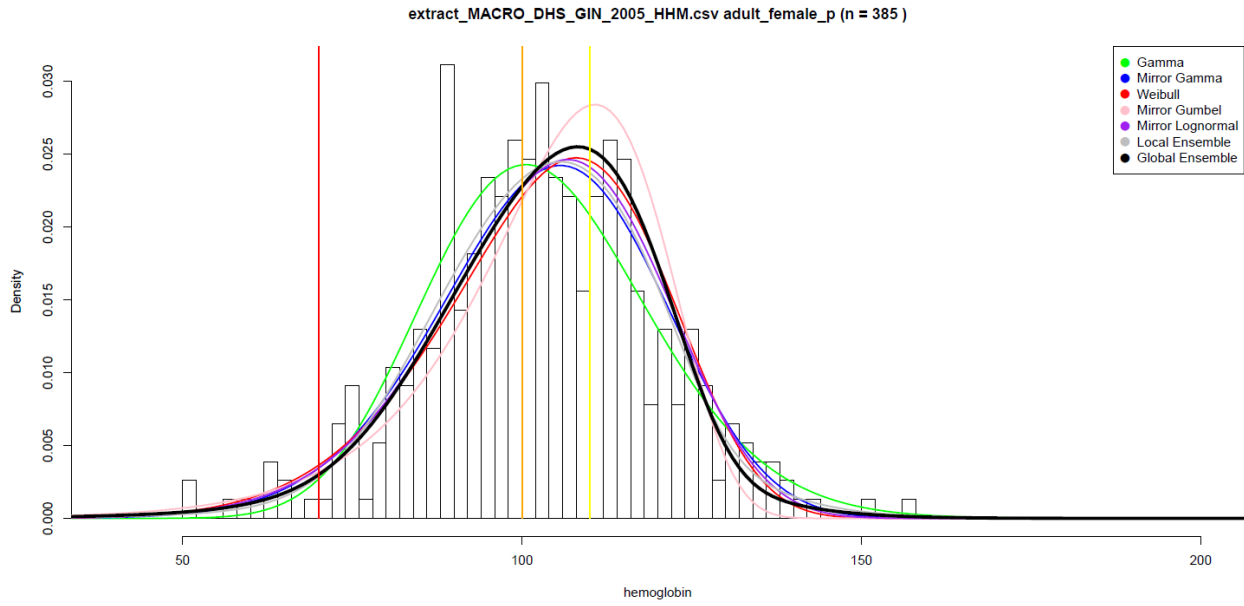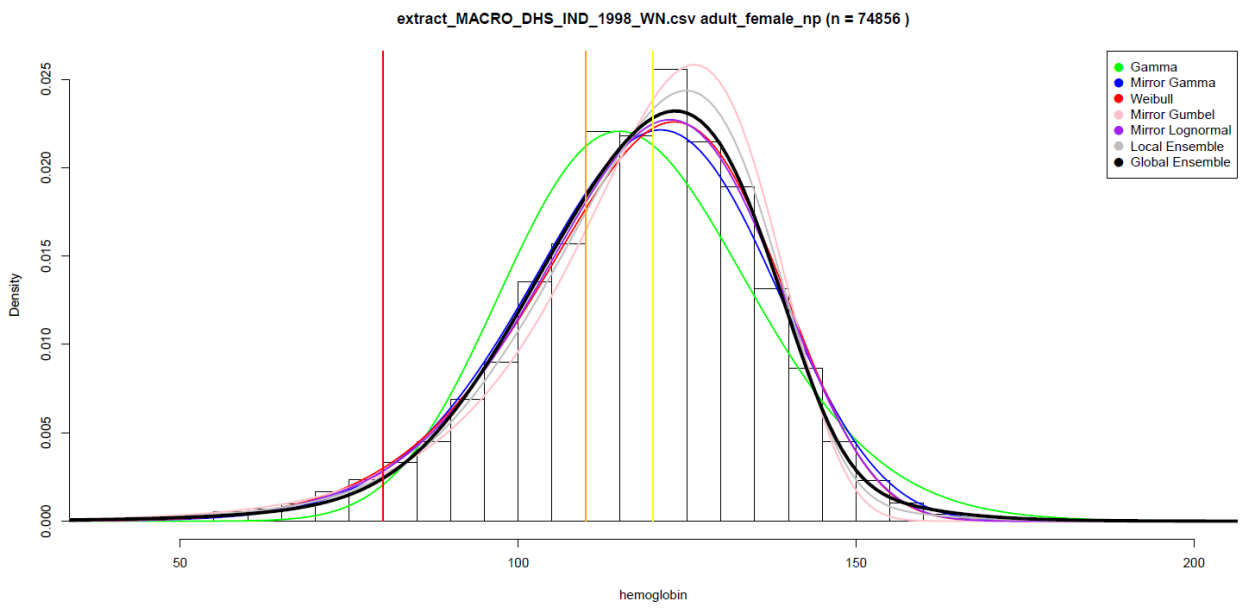

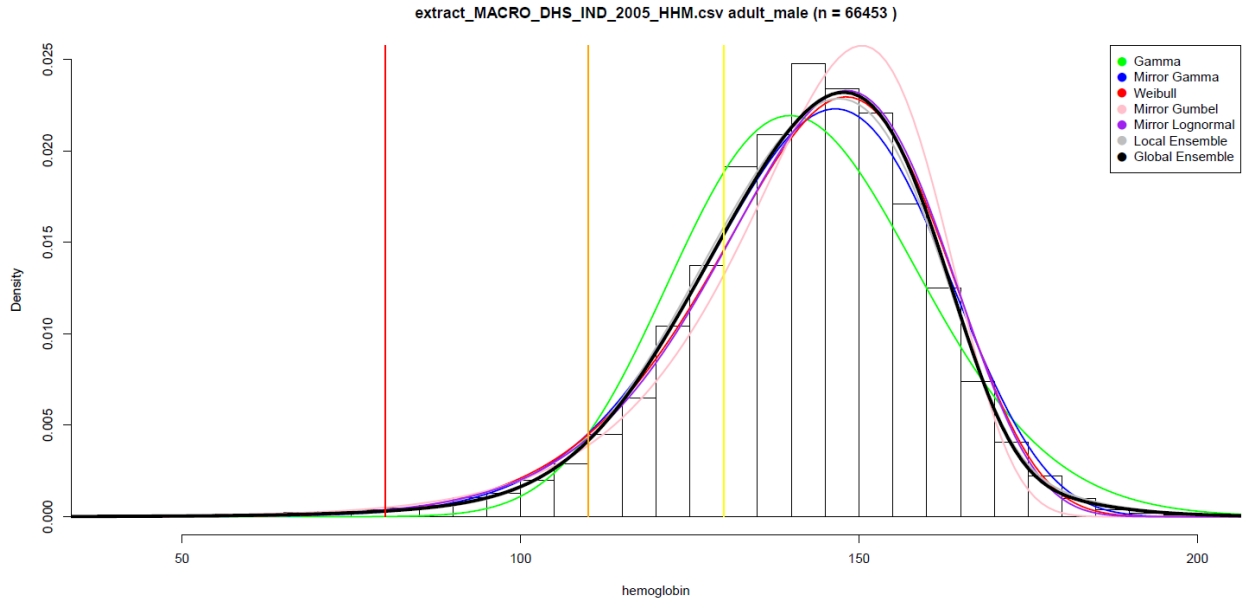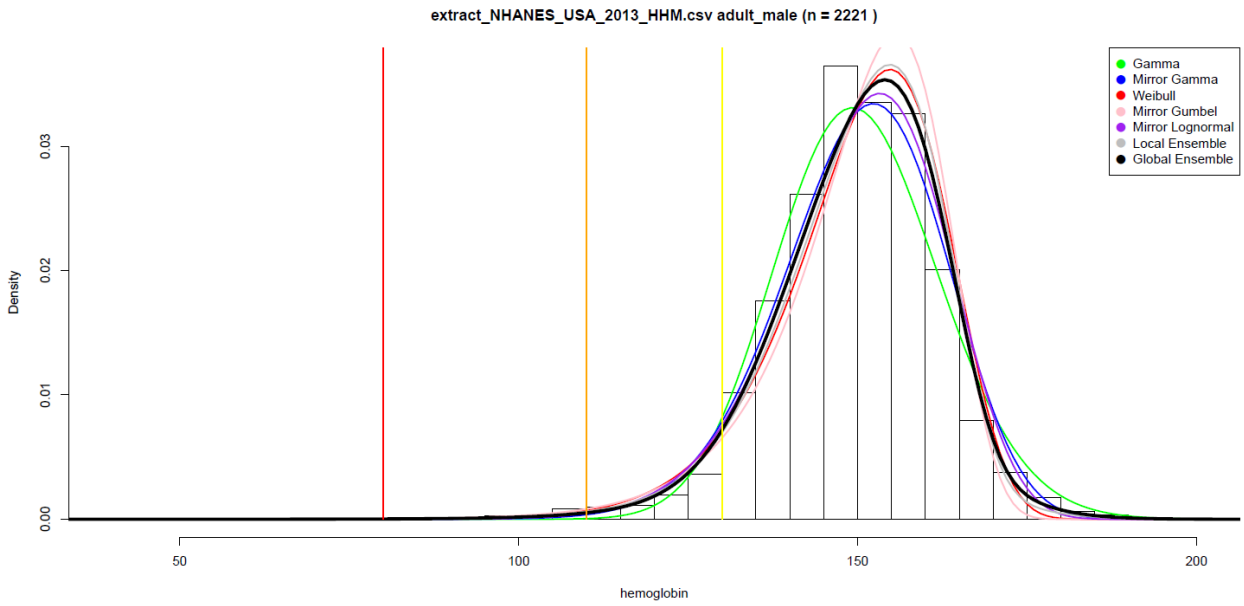

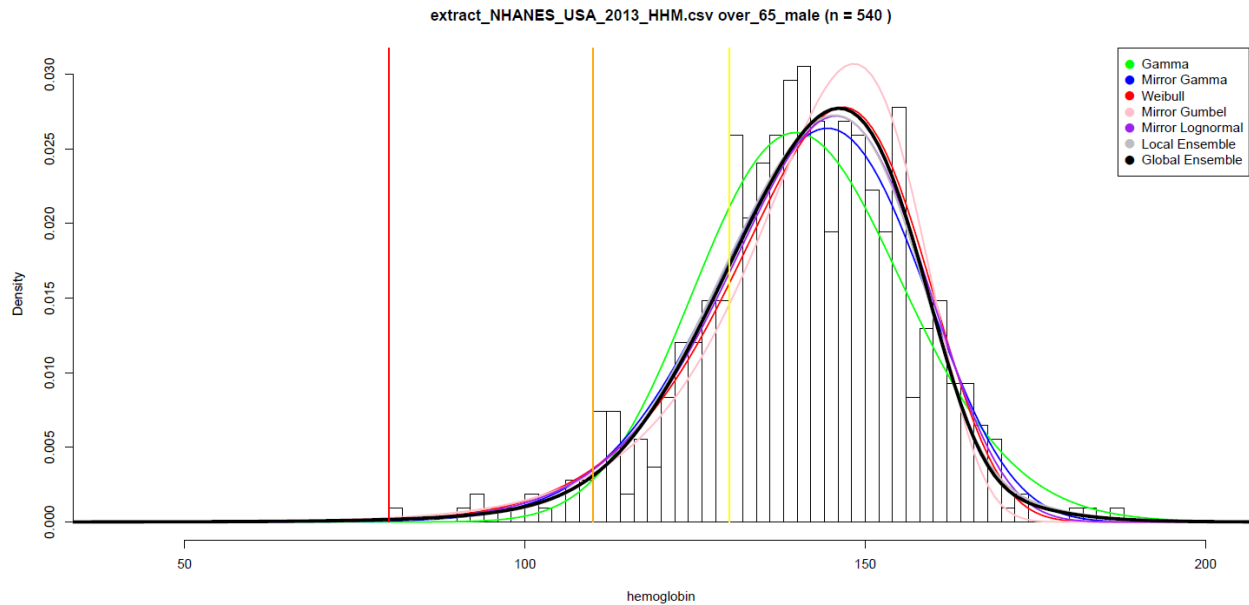

## Causal Attribution

We performed cause-specific attribution on the anemia envelope using information on cause-specific prevalence and hemoglobin shift, which uses the same overall method as in the GBD 2010 with the addition of a number of causes and updates to hemoglobin shifts for inputs to causal attribution.

Total “hemoglobin shift” was determined as the difference between the normal and predicted mean hemoglobin levels for each population group. We denoted the normal hemoglobin level as the global 95th percentile of the distribution of mean-hemoglobin within each age- group, sex, and year. We then determined a total shift for each country in the corresponding age-group, sex, and year by finding the difference between the global “normal” and the country-specific predicted mean hemoglobin. Our model of attribution followed that, because the shift is a disease state experienced by 100% of the population, then the sum of cause-specific hemoglobin shifts times the prevalence of each contributing cause should add up to the total. We summed shift times prevalence estimates from all causes, compared to the total predicted hemoglobin shift, and proportionally assigned. We distributed the residual envelope among seven remaining causes.

Of note, our iron-deficiency anemia (IDA) estimates include acute and chronic hemorrhagic states for which supplementation may be helpful, but poor nutritional intake is not the only underlying problem. A few causes in this category – hookworm, schistosomiasis, upper gastrointestinal bleeding, and gynecologic diseases – were considered separately from IDA because there was enough data from GBD prevalence estimation processes to do so. Distribution of anemia burden to IDA only after assignment to “known” causes avoided double counting of these cases. Most other causes of anemia not specifically considered were included in the “other” categories.

For all causes with specific population-specific prevalence estimates, we enforced a condition where the sum of mild, moderate, and severe anemia would not exceed the total prevalence within each population. Additionally, because inherent in our method of determining “normal” hemoglobin is the fact that 5% of population groups will have zero, or negative, total shift, we assigned a minimum of 10% of all

anemia to be assigned to residual causes based on review of findings from National Health and Nutrition Examination Survey (NHANES) in the United states<sup>5,6</sup>.

We again used Bayesian contingency table modelling methods developed for GBD 2013 to disaggregate marginal estimates of anemia severity and aetiology into a complete set of prevalence estimates for aetiology/severity pairs. Marginal estimates of column sums (total anaemia prevalence by severity [mild, moderate, severe]) and row sums (total aetiology prevalence for each cause) were paired with priors on the etiology-specific hemoglobin shifts (the same as were used for overall etiologic attribution) and rank order of variation of severity (e.g. malaria-induced anaemia severity is highly variable while that due to homozygous sickle cell disease is less so). Nonlinear optimization methods were then used to populate a complete matrix of aetiology-severity estimates from the marginal estimates and distribution priors. We found the maximum a posteriori (MAP) point estimate for 5 samples from estimated posterior distributions independently for each population group, then scaled the results to ensure row sums were non-zero and column sums matched the original draws. We then took the mean of the scaled posteriors for each population group. To estimate uncertainty for each scaled posterior mean, we first calculated the ratio of each draw to the mean of all draws for the anemia envelope. For non-residual causes, we also calculated the ratio of each draws to the mean of all draws. We then multiplied the scaled posterior mean by these ratios.

The anemia causal attribution process produces estimates for mild, moderate, and severe anemia due to HIV. Using these estimates, we calculated proportions of HIV with mild, moderate, severe, and no anemia for each demographic group. GBD produces estimates for seven HIV sub-causes: early HIV, symptomatic HIV, AIDS with antiretroviral treatment, AIDS without antiretroviral treatment, drug-sensitive HIV/AIDS – Tuberculosis, multidrug-resistant HIV/AIDS – Tuberculosis, and extensively drug-resistant HIV/AIDS – Tuberculosis. We assumed the anemia severity proportions were equivalent across the seven sub-causes, and estimated the anemia severity levels for each by multiplying the HIV sub-causes by the anemia proportions.

**Priors: Largest\***

| <b>Anemia Subtype</b>        | <b>Expected Largest</b> |
|------------------------------|-------------------------|
| Malaria (PFPR)               | 0                       |
| Schistosomiasis              | 0                       |
| Hookworm                     | 0                       |
| Other NTDs                   | 0                       |
| Maternal Hem.                | 1                       |
| Iron Deficiency              | 0                       |
| Other Infectious Diseases    | 0                       |
| Peptic Ulcer Disease (PUD)   | 2                       |
| Gastritis                    | 2                       |
| CKD due to Diabetes, Stage 3 | 1                       |
| CKD due to Diabetes, Stage 4 | 1                       |

|                                              |   |
|----------------------------------------------|---|
| CKD due to Diabetes, Stage 5                 | 2 |
| CKD due to Hypertension, Stage 3             | 1 |
| CKD due to Hypertension, Stage 4             | 1 |
| CKD due to Hypertension, Stage 5             | 2 |
| ckd_glomerulo3                               | 1 |
| ckd_glomerulo4                               | 1 |
| ckd_glomerulo5                               | 2 |
| CKD due to Other, Stage 3                    | 1 |
| CKD due to Other, Stage 4                    | 1 |
| CKD due to Other, Stage 5                    | 2 |
| Uterine Fibroids                             | 0 |
| Other Gyne                                   | 0 |
| Other Hemoglobinopathies                     | 1 |
| Endocrine, Metabolic & Other Blood Disorders | 0 |
| hemog_g6pd                                   | 1 |
| hemog_g6pd_hemi                              | 1 |
| hemog_thalass_btm                            | 2 |
| hemog_thalass_btt                            | 1 |
| hemog_thalass_ett                            | 0 |
| hemog_thalass_hebt                           | 2 |
| hemog_thalass_hhd                            | 2 |
| hemog_sickle_hscbt                           | 2 |
| hemog_sickle_hscd                            | 2 |
| hemog_sickle_scbt                            | 2 |
| hemog_sickle_sct                             | 0 |
| HIV                                          | 0 |

\*0 = mild anemia; 1 = moderate anemia; 2 = severe anemia

Priors: Severity

| Anemia Subtype             | Expected Variation |
|----------------------------|--------------------|
| Malaria                    | 1                  |
| Gastritis                  | 2                  |
| Peptic Ulcer Disease (PUD) | 3                  |
| Maternal Hem.              | 4                  |
| Endocrine                  | 5                  |
| Other Gyne                 | 6                  |
| Other Infectious           | 7                  |
| Other NTDs                 | 8                  |
| ckd_other3                 | 9                  |
| ckd_htn3                   | 10                 |
| ckd_diabetes3              | 11                 |
| ckd_glomerulo3             | 12                 |
| ckd_other4                 | 13                 |
| ckd_htn4                   | 14                 |
| ckd_diabetes4              | 15                 |
| ckd_glomerulo4             | 16                 |
| ckd_other5                 | 17                 |
| ckd_htn5                   | 18                 |
| ckd_diabetes5              | 19                 |
| ckd_glomerulo5             | 20                 |
| hemog_thalass_ett          | 21                 |
| hemog_sickle_sct           | 22                 |
| hemog_thalass_btt          | 23                 |
| hemog_g6pd                 | 24                 |
| hemog_g6pd_hemi            | 25                 |
| Iron Deficiency            | 26                 |
| Uterine Fibroids           | 27                 |
| hemog_sickle_hscd          | 28                 |
| Schistosomiasis            | 29                 |
| hemog_thalass_hhd          | 30                 |
| Other Hemoglobinopathies   | 31                 |
| hemog_sickle_scbt          | 32                 |
| Hookworm                   | 33                 |
| hemog_thalass_hebt         | 34                 |
| hemog_sickle_hscbt         | 35                 |
| hemog_thalass_btm          | 36                 |
| HIV                        | 37                 |

**Causes for which allocation of residual anemia envelope was based on fixed proportion redistribution methods\*:**

Iron-deficiency anemia (IDA)

Uterine fibroids

Other infectious diseases

Other gynecological disorders

Other neglected tropical diseases

Other endocrine, nutrition, blood and immune disorders

Other hemoglobinopathies and hemolytic anemias

\* A minimum of 10% of all anemia was assigned to residual categories based on analysis of NHANES-III data from the United States

## References

1. Kassebaum NJ. The Global Burden of Anemia. *Hematology/Oncology Clinics* 2016; **30**: 247–308.
2. Kassebaum NJ, Jasrasaria R, Naghavi M, *et al.* A systematic analysis of global anemia burden from 1990 to 2010. *Blood* 2014; **123**: 615–24.
3. WHO | Haemoglobin concentrations for the diagnosis of anaemia and assessment of severity. Geneva: World Health Organization, 2011 <http://www.who.int/vmnis/indicators/haemoglobin.pdf>.
4. Kates EH, Kates JS. Anemia and polycythemia in the newborn. *Pediatr Rev* 2007; **28**: 33–4.
5. Centers for Disease Control and Prevention (CDC). Iron deficiency--United States, 1999-2000. *MMWR Morb Mortal Wkly Rep* 2002; **51**: 897–9.
6. Looker AC, Dallman PR, Carroll MD, Gunter EW, Johnson CL. Prevalence of iron deficiency in the United States. *JAMA* 1997; **277**: 973–6.

# Epilepsy Impairment

## Flowchart

### Epilepsy

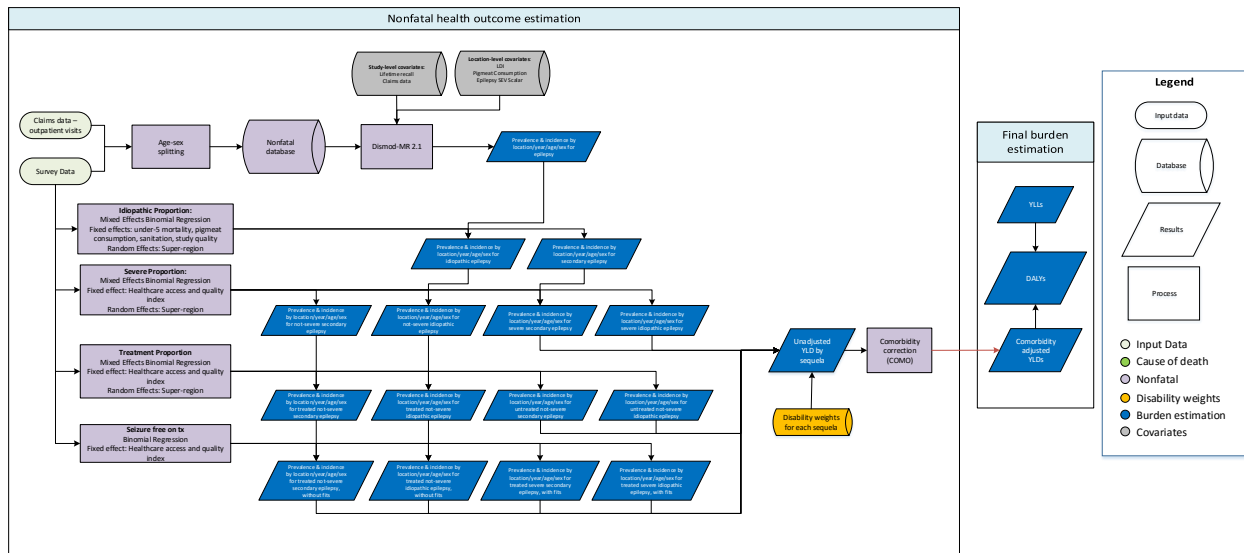

## Case definition

Since GBD 2013, we have used the following definitions from the “Guidelines for Epidemiologic Studies on Epilepsy”: 1) Epilepsy: a condition characterized by recurrent (two or more) epileptic seizures, unprovoked by any immediate identified cause, and 2) “Active” epilepsy: a prevalent case of active epilepsy is defined as a person with epilepsy who has had at least one epileptic seizure in the previous five years, regardless of antiepileptic drug (AED) treatment. We also use the following ICD-10 codes for epilepsy: G40 (Neuro, epilepsy, total) and G41 (Neuro, epilepsy, status epilepticus). We defined severe epilepsy as having seizures one or more times per month.

## Input data

### Model inputs

For GBD 2016, we conducted a systematic review covering 10/1/2014 to 10/7/2016 using the following search string:

("2014/10/01"[PDAT] : "2016"[PDAT]) AND ("epilepsy"[MeSH Terms] OR "epilepsy, partial, motor"[MeSH Terms] OR "epilepsy, benign neonatal"[MeSH Terms] OR "epilepsy, reflex"[MeSH Terms] OR "myoclonic epilepsy, juvenile"[MeSH Terms] OR "epilepsy, frontal lobe"[MeSH Terms] OR "epilepsy, complex partial"[MeSH Terms] OR "epilepsy, post-traumatic"[MeSH Terms] OR "epilepsy, temporal lobe"[MeSH Terms] OR "epilepsy, absence"[MeSH Terms] OR "epilepsy, tonic-clonic"[MeSH Terms] OR "epilepsies, myoclonic"[MeSH Terms] OR "epilepsies, partial"[MeSH Terms] OR epilepsy[Title/Abstract]) AND (incidence[Title/Abstract] OR prevalence[Title/Abstract]) NOT(animals[MeSH] NOT humans[MeSH]).



Of 952 hits, 32 were marked for extraction. Additional data seeking efforts also led to the addition of 12 more sources on epilepsy prevalence in India subnationals. A flow chart documenting the review is displayed below.

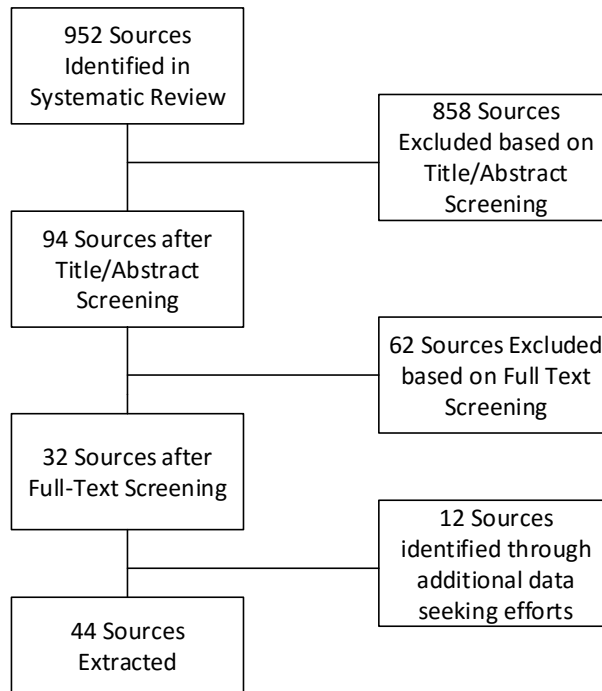

We included representative, population-based surveys that reported of prevalence, incidence, remission rate, excess mortality rate, relative risk of mortality, standardized mortality ratio, or with-condition mortality rate. We excluded studies with no clearly defined sample (eg, among clinic attenders or patient organization members with non-specific or non-representative catchment area). The table below details the model inputs used to estimate the epilepsy impairment.

|                        | Prevalence | Incidence | Mortality risk |
|------------------------|------------|-----------|----------------|
| Studies                | 317        | 81        | 23             |
| Countries/subnationals | 192        | 51        | 23             |
| GBD world regions      | 20         | 15        | 10             |

The inputs for the regressions used to split the epilepsy impairment envelope were also updated for GBD 2016. These regressions are used to determine the proportion of epilepsy that is primary or idiopathic, the proportion of epilepsy that is severe (one or more fits per month), the proportion of epilepsy that is untreated (the treatment gap), and the proportion of treated epilepsy that is treated without fits (no fits reported in the preceding year).

For GBD 2016, a new systematic review was conducted covering 1/1/2006 to 10/17/2016 using the search term:

("2006"[PDAT] : "2016"[PDAT]) AND ("epilepsy"[MeSH Terms] OR "epilepsy, partial, motor"[MeSH Terms] OR "epilepsy, benign neonatal"[MeSH Terms] OR "epilepsy, reflex"[MeSH Terms] OR "myoclonic epilepsy, juvenile"[MeSH Terms] OR "epilepsy, frontal lobe"[MeSH Terms] OR "epilepsy, complex partial"[MeSH Terms] OR "epilepsy, post-traumatic"[MeSH Terms] OR "epilepsy, temporal lobe"[MeSH Terms] OR

"epilepsy, absence"[MeSH Terms] OR "epilepsy, tonic-clonic"[MeSH Terms] OR "epilepsies, myoclonic"[MeSH Terms] OR "epilepsies, partial"[MeSH Terms] OR epilepsy[Title/Abstract]) AND (incidence[Title/Abstract] OR prevalence[Title/Abstract] OR epidemiology[Title/Abstract]) AND (sever\*[Title/Abstract] OR treated[Title/Abstract] OR "drug resistant epilepsy"[MeSH] OR "treatment resistant"[Title/Abstract] OR proportion[Title/Abstract] OR "clinical characteristics"[Title/Abstracts] OR "treatment gap"[Title/Abstract]) NOT(animals[MeSH] NOT humans[MeSH])

Of 1,234 hits, 37 were marked for extraction. Additional data seeking efforts also led to the addition of five more sources on the treatment gap in India subnationals. A flow chart documenting the review is displayed below.

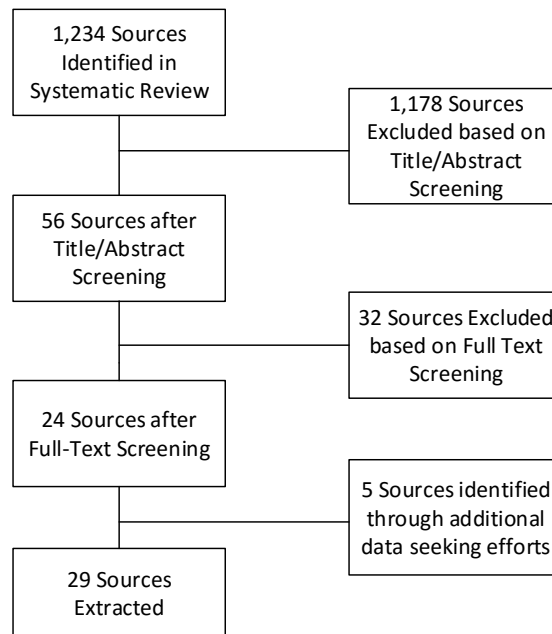

### Severity splits & disability weights

The table below illustrates the severity levels, descriptions, and disability weights associated with epilepsy. These are calculated using regressions from literature (ie, frequency of seizures).

| Severity level                            | Lay description                                                                                                                                                                                                                                    | Disability weights (95% CI) |
|-------------------------------------------|----------------------------------------------------------------------------------------------------------------------------------------------------------------------------------------------------------------------------------------------------|-----------------------------|
| severe (seizures $\geq$ once per month)   | This person has sudden seizures one or more times each month, with violent muscle contractions and stiffness, loss of consciousness, and loss of urine or bowel control. Between seizures the person has memory loss and difficulty concentrating. | 0.552<br>(0.375–0.71)       |
| less severe (seizures $<$ once per month) | This person has sudden seizures two to five times a year, with                                                                                                                                                                                     | 0.263<br>(0.173–0.367)      |

|                      |                                                                                                                                            |                        |
|----------------------|--------------------------------------------------------------------------------------------------------------------------------------------|------------------------|
|                      | violent muscle contractions and stiffness, loss of consciousness, and loss of urine or bowel control.                                      |                        |
| Treated without fits | This person has a chronic disease that requires medication every day and causes some worry but minimal interference with daily activities. | 0.049<br>(0.031–0.072) |

### Modelling strategy

We modelled the prevalence of epilepsy in two steps: first, we created an epilepsy impairment envelope. Second, we split the envelope into primary (or idiopathic) and secondary epilepsies. Each of these were subdivided into “severe” (on average one or more fits per month) and “non-severe.” Non-severe cases were subdivided into “treated” and “un-treated.” Finally, “treated” cases were divided into “treated cases with fits” (between one and 11 fits on average in the preceding year) and “treated cases without fits” (no fits reported in the preceding year).

In the first step, we used the DisMod-MR tool for the epilepsy impairment envelope to model a consistent fit between incidence, prevalence, remission, and standardized mortality ratio data while using meta-regression to correct data points with non-reference study quality characteristics. We found no systematic bias for the covariate “non-standard case definition” indicating studies that did not define “active epilepsy” and additionally the covariate was not significant as a “z-cov”, which acts as a multiplier applied to the standard error and thus results in these data points being given less weight in the analysis than the “reference” data points. Therefore, we excluded this covariate from the model. We also included data on lifetime prevalence and therefore added a covariate on lifetime prevalence data points. We also included country-level covariates on prevalence for the SEV epilepsy scalar, which summarizes the epilepsy risk exposure level for each country, and pig meat consumption per capita, which is used as a proxy for the level of neurocysticercosis, a common cause of secondary epilepsy. We included cause-specific mortality rate (CSMR) results from the epilepsy mortality model as input data to the DisMod model. Where age-specific prevalence data was available, we calculated excess mortality rate (EMR) from prevalence and CSMR. We included the log of the lag distributed income (LDI) as a covariate on EMR to account for lower mortality in developed countries. We included Bayesian priors on remission to account for the scarcity of remission data. We set bounds on remission from 0 to 0.25 from age 0-60 and 0 to 0.05 from age 61-100. The table below indicates the covariates used in the estimation process, as well as parameters, betas, and exponentiated betas.

| Measure    | Variable Name             | Beta                  | Exponentiated    |
|------------|---------------------------|-----------------------|------------------|
| prevalence | Recall Lifetime           | 0.18 (0.15 – 0.22)    | 1.20 (1.17–1.24) |
| prevalence | All MarketScan, year 2000 | -0.89 (-0.94 – -0.83) | 0.41 (0.39–0.43) |
| prevalence | All MarketScan, year 2010 | -0.43 (-0.47 – -0.37) | 0.65 (0.62–0.69) |

|                       |                                                          |                          |                  |
|-----------------------|----------------------------------------------------------|--------------------------|------------------|
| prevalence            | All MarketScan, year 2012                                | -0.35 (-0.41 – -0.30)    | 0.70 (0.67–0.74) |
| prevalence            | Pig Meat Consumption (kg per capita)                     | 0.0054 (0.00012 – 0.015) | 1.01 (1.00–1.02) |
| Prevalence            | Log-transformed age-standardized SEV scalar for epilepsy | 0.79 (0.75-0.90)         | 2.21 (2.12-2.46) |
| excess mortality rate | LDI (I\$ per capita)                                     | -0.55 (-1 – -0.1)        | 0.58 (1.37–0.90) |

In the second step, we used a mixed-effects generalized linear models (binomial family) to predict the proportion of idiopathic epilepsy, the proportion of severe epilepsy, the proportion of treated epilepsy and the proportion of epilepsy that is treated without fits.

Because not all of the data on the proportion of idiopathic epilepsy uses optimal case finding methods (using CT scans or MRI's in addition to EEG's in order to diagnose secondary epilepsy), for GBD 2016 we decided to do add a covariate to crosswalk studies with non-optimal case finding methods to those with adequate methods. The regression for the proportion of epilepsy that is idiopathic therefore has fixed effects on this study quality covariate as well as the under-5 mortality rate, the log of pig meat consumption (per capita), and the proportion of a country with access to proper sanitation, as well as a random effect on super-region.

We used similar models to predict the proportion of severe epilepsy and treatment gap based on the reported proportions extracted from the systematic review. To predict the proportion of severe epilepsy and the treatment gap, we used mixed-effects models with a fixed effect on the log of HAQ Index and a random effect on super-region.

For GBD 2015, a meta-analysis was used to generate two different pooled estimates for proportion of treated epilepsy that is seizure-free in developing and developed countries, as there was not enough data to run a regression. However, for GBD 2016 the expanded dataset allowed for the implementation of a generalized linear model (binomial family) to generate predictions for the proportion of treated epilepsy that is seizure-free. We used a fixed effect on the log of HAQ Index.

We tested a fixed effect on Socio-demographic Index (SDI) and random effects on region and country in different models, but they did not improve the model. We generated 1,000 draws of country-specific estimates for each year between 1980 and 2016 for each of the models. The table below shows the betas from these regressions.

| Regression | covariate            | beta   | SE   |
|------------|----------------------|--------|------|
| Idiopathic | Under-5 Mortality    | -65.82 | 7.50 |
| Idiopathic | Pig meat consumption | -0.12  | 0.02 |
| Idiopathic | Sanitation           | 0.45   | 0.16 |
| Idiopathic | Study Quality        | 0.88   | 0.07 |
| Severe     | HAQ Index            | -2.15  | 0.24 |

|                      |           |       |      |
|----------------------|-----------|-------|------|
| Treatment Gap        | HAQ Index | -3.17 | 0.18 |
| Treated without fits | HAQ Index | 3.65  | 0.21 |

# Infertility Impairment

## Flowchart

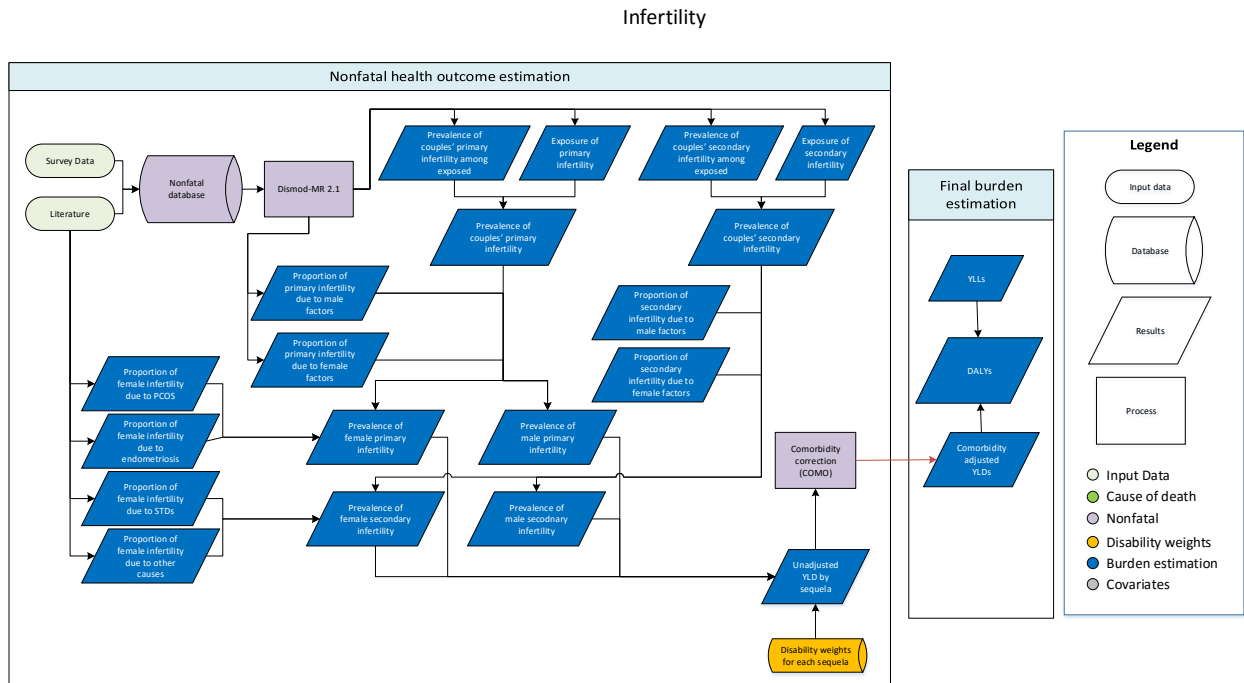

## Case definition

For GBD 2016, the following case definitions were used for infertility:

1. Primary infertility is defined as a couple who have not had a live birth, who wish to have a child, and have been in a union for more than five years without using contraceptives.
2. Secondary infertility is defined in a couple who wish to have a child and have been in a union for more than five years without using contraceptives since the last live birth.

## Input data

### Model inputs

We included data for women in five-year age groups between ages 15 and 49 from population-based surveys including the Demographic and Health Surveys (DHS), World Fertility Surveys (WFS), Reproductive Health Surveys (RHS), Family and Fertility Survey (FFS), and others (EUR, NSF, PCD, PFM). Although these surveys only interviewed women, the resultant estimate of prevalence is an indicator of couples' infertility, as it is not possible to determine in a survey which partner is the cause of the infertility. Because some surveys ask questions of only ever-married women, we separately estimated the prevalence of four parameters:

| Infertility Type | Parameter                                               | Numerator                                                                                                 | Denominator                                                                       |
|------------------|---------------------------------------------------------|-----------------------------------------------------------------------------------------------------------|-----------------------------------------------------------------------------------|
| Primary          | Prevalence of primary infertility among exposed women   | Married 5+ years; no contraception for 5+ years prior to survey; no previous births; desires a child      | Numerator OR: Married 5+ years; 1 or more birth                                   |
| Primary          | Prevalence of exposure to primary infertility           | Married 5+ years; no contraception for 5+ years prior to survey                                           | All women                                                                         |
| Secondary        | Prevalence of secondary infertility among exposed women | Married 5+ years; no contraception for 5+ years prior to survey; last birth 5+ years ago; desires a child | Numerator OR: Married 5+ years; first birth 5+ years ago; last birth <5 years ago |
| Secondary        | Prevalence of exposure to secondary infertility         | Married 5+ years; no contraception for 5+ years prior to survey; one or more child                        | All women                                                                         |

As described below, infertility will be estimated by multiplying prevalence among exposed by the exposure. The table below illustrates the extent of data coverage for the infertility impairment for GBD 2016.

**Table 2: Data coverage**

| Model                                   | Sources | Subnational | Country | Region | Super-region |
|-----------------------------------------|---------|-------------|---------|--------|--------------|
| primary infertility impairment          | 314     | 1           | 113     | 20     | 7            |
| secondary infertility impairment        | 315     | 1           | 112     | 19     | 7            |
| primary infertility exposure            | 266     | 1           | 101     | 17     | 7            |
| secondary infertility exposure          | 267     | 1           | 101     | 17     | 7            |
| proportion male primary infertility     | 18      | 2           | 15      | 8      | 6            |
| proportion female primary infertility   | 18      | 2           | 15      | 8      | 6            |
| proportion male secondary infertility   | 18      | 2           | 15      | 8      | 6            |
| proportion female secondary infertility | 18      | 2           | 15      | 8      | 6            |

### *Sequelae/disability weights*

| Health state name      | Health state description                                                                                                               | Disability weight      |
|------------------------|----------------------------------------------------------------------------------------------------------------------------------------|------------------------|
| Infertility, primary   | This person wants to have a child and has a fertile partner, but the couple cannot conceive.                                           | 0.008<br>(0.003-0.015) |
| Infertility, secondary | This person has at least one child, and wants to have more children. The person has a fertile partner, but the couple cannot conceive. | 0.005<br>(0.002-0.011) |

## Modelling strategy

For GBD 2016, we estimated the prevalence of primary and secondary infertility by sex and cause in three steps.

### 1) *Estimation of couples' infertility*

To estimate the prevalence of infertility among couples, we first ran four DisMod-MR 2.1 models to estimate the four parameters detailed above. For prevalence of infertility, we tried using the natural log of the age-standardized death rate (lnASDR) of STDs, but it was not statistically significant so we did not use it in the final model.

Next, we estimated primary and secondary infertility from DisMod-MR 2.0 models by multiplying the estimates for prevalence of infertility among exposed women by the prevalence of exposure to infertility to obtain prevalence of infertility among all women and all men.

### *2) Estimation of infertility by sex*

We ran four DisMod models to estimate the proportion of primary and secondary infertility due to male or female causes. Because infertility in some couples is attributable to both partners rather than just one, the sum of the proportion of couples' prevalence due to male factor infertility and due to female factor infertility is greater than 1. Again, we tried using lnASDR of STDs as a covariate, but it was not statistically significant so we did not use it in the final model. We multiplied our prevalence of primary and secondary infertility derived in step 1 by the proportion due to male and female factors to estimate primary and secondary infertility by sex.

### *3) Causal attribution*

There are seven identified causes of female infertility in the GBD 2013 cause list: chlamydia, gonorrhea, other sexually transmitted diseases, maternal sepsis, polycystic ovarian syndrome, endometriosis, and Turner syndrome. For each of these diseases, we determined the prevalence of infertility by a literature review of the probability of becoming infertile due to that disease. For sexually transmitted diseases we applied a proportion with infertility derived from Westrom et al. (1992, Sex Transm Dis) to incident cases of pelvic inflammatory disease and streamed out prevalence over the fertile age range using DisMod-MR 2.0.12. We added all the disease-specific estimates of prevalence and assigned the remaining proportion to categories of "female primary infertility due to other causes" and "female secondary infertility due to other causes." We assumed all infertility from Turner syndrome is primary infertility and all infertility following maternal sepsis is secondary infertility. The only recognized cause of male infertility in the GBD 2013 cause list is Klinefelter syndrome. We assigned all other male infertility to "male infertility due to other causes."

We have made no substantive changes in the modelling strategy from GBD 2015.



# Developmental Intellectual Disability Impairment

## Flowchart

### Case definition

Developmental intellectual disability is a condition of below-average intelligence or mental ability. Consistent with the American Association on Intellectual and Developmental Disabilities, we define developmental intellectual disability as a condition originating before age 18 (thus, does not include impairment due to stroke, Alzheimer's, etc.). We model the following severities, as measured by intelligence quotient (IQ) tests:

| Type of intellectual disability | IQ       |
|---------------------------------|----------|
| Profound                        | 0 to 19  |
| Severe                          | 20 to 34 |
| Moderate                        | 35 to 49 |
| Mild                            | 50 to 69 |
| Borderline                      | 70 to 85 |

## Input data

### Model inputs

1) Prevalence data: Prevalence of intellectual disability (IQ < 70) came from a systematic review starting 1/1/1990 using the following search string:  
(((intellectual disability[MeSH Terms]) AND prevalence[Title/Abstract]) AND ('1990'[Date - Publication] : '3000'[Date - Publication]))

For GBD 2015, this search had 2,115 hits, of which 13 were extracted that had not been previously included in GBD. We included studies that estimate the general population prevalence of intellectual disability. We excluded studies that do not use a case definition based on intelligence quotient (IQ) or investigated non-representative groups, like hospital patients or people of a specific ethnicity.

- 2) IQ mean and standard deviation: Data for mean and SD of IQ came from three source types:
- IQ instruments: We conducted a systematic review for IQ scores from standardized tests designed to measure intelligence. Given the vast number of instruments that are used to measure IQ, we used instrument-specific search strings. In total, our search had 85,000 hits, of which 69 were extracted. We excluded non-general populations or non-school populations (eg, gifted or impaired populations). We extracted the mean and SD of IQ, in addition to whether or not a norming procedure had been applied to the data. Where available, we extracted the raw mean and SD as well as the normalized mean and SD.
  - International Educational Attainment (IEA) surveys: Scores from standardized mathematics, reading, and/or science exams were extracted from school-based surveys, given that IEA tests measure a closely related concept to IQ in school-age populations.

c.

| Survey                                                        | Country-Years     |
|---------------------------------------------------------------|-------------------|
| Programme for International Student Assessment (PISA)         | 73 country-years  |
| Progress in International Reading Literacy Study (PIRLS)      | 212 country-years |
| Trends in International Mathematics and Science Study (TIMSS) | 156 country-years |

d. Cognitive function surveys: Scores from cognitive function surveys were used where IQ and IEA data were unavailable, particularly for older populations and infants.

| Survey                                                     | Country-Years        |
|------------------------------------------------------------|----------------------|
| Survey of Health, Ageing, and Retirement in Europe (SHARE) | 131 country-years    |
| WHO Study on Global AGEing and Adult Health (SAGE)         | 12 country-years     |
| Longitudinal Study of Ageing (LSA)                         | TBD                  |
| Health and Retirement Survey (HRS)                         | TBD                  |
| Bayley Scales of Infant and Toddler Development            | TBD; from literature |

*Severity split/disability weight*

| Health state                                         | Description                                                                                                                                                                                                                                           | Disability weight      |
|------------------------------------------------------|-------------------------------------------------------------------------------------------------------------------------------------------------------------------------------------------------------------------------------------------------------|------------------------|
| Borderline intellectual functioning                  | This person is slow in learning at school. As an adult, the person has some difficulty doing complex or unfamiliar tasks but otherwise functions independently.                                                                                       | 0.011<br>(0.005–0.02)  |
| Intellectual disability/mental retardation, mild     | This person has low intelligence and is slow in learning at school. As an adult, the person can live independently, but often needs help to raise children and can only work at simple supervised jobs.                                               | 0.043<br>(0.026–0.064) |
| Intellectual disability/mental retardation, moderate | This person has low intelligence, and is slow in learning to speak and to do even simple tasks. As an adult, the person requires a lot of support to live independently and raise children. The person can only work at the simplest supervised jobs. | 0.1<br>(0.066–0.142)   |
| Intellectual disability/mental retardation, severe   | This person has very low intelligence and cannot speak more than a few words, needs constant supervision and help with most daily activities, and can do only the simplest tasks.                                                                     | 0.16<br>(0.107–0.226)  |
| Intellectual disability/mental retardation, profound | This person has very low intelligence, has almost no language, and does not understand even the most basic requests or instructions. The person requires constant supervision and help for all activities.                                            | 0.2<br>(0.133–0.283)   |

## Modelling strategy

We modelled the prevalence estimates of intellectual disability (ID), both aetiology-specific IDs and idiopathic ID, over multiple steps. For GBD 2016, our modelling strategy changed significantly. We additionally used IQ distribution data to inform the estimates of ID prevalence, as follows.

### 1) *Estimate Intellectual Disability Prevalence (IQ <70)*

First, we ran a DisMod-MR 2.1 model to estimate the total prevalence of intellectual disability of level IQ <70. We included lag-distributed income and education in the model.

### 2) *Estimate population mean and SD of Intelligence Quotient*

Second, we crosswalked International Educational Attainment data and cognitive function surveys to one standard IQ measure. We crosswalked by matching country/age/year sources for which we had two or more types of data. Using the IQ data and the data converted to IQ as inputs, we ran a single-parameter, continuous DisMod-MR 2.1 model estimating the mean and SE of IQ using standardized measure. In this model, we included log-transformed LDI (per capita), proportion underweight, and log-transformed education (age-standardized) as country-level covariates in this model. We additionally included as a covariate an indicator of instrument-type. These instrument-types were determined based upon similarity of theoretical constructs and concurrent validity.

### 3) *Fit parametric distribution to mean and SD of IQ and prevalence of intellectual disability*

We fit a distribution using the mean and SD of IQ, and the prevalence of ID using an ensemble approach. The ensemble approach takes a weighted average of multiple distributions, rather than a single distribution. The distribution is fit via a Method of Moments, where each potential distribution is weighted based upon in-sample fit. This allows us to adapt to different skew over time and geographies, and is a highly generalizable approach that does not specify the underlying distribution.

### 4) *Severity-specific intellectual disability*

We split the total prevalence of idiopathic ID into four severity levels: mild (IQ 50-69), moderate (IQ 35-49), severe (IQ 20-34), and profound (IQ below 20).

### 5) *Causal attribution*

We estimated prevalence of each etiology-specific ID by models from the following parent causes. Since we are modelling only developmental intellectual disability, causes such as stroke and Alzheimer's are not included in the causal attribution process.

Neonatal preterm birth complications (<28w, 28-32w, 32-36w)  
Neonatal encephalopathy due to birth asphyxia and trauma  
Hemolytic disease and other neonatal jaundice  
Meningitis (pneumococcal, H influenza type B, meningococcal, other bacterial)  
Encephalitis  
Malaria  
Neonatal tetanus  
Iodine deficiency  
African trypanosomiasis  
Down syndrome  
Klinefelter syndrome  
Chromosomal unbalanced rearrangements

Neural tube defects  
Hypertensive disorders of pregnancy (eclampsia, preeclampsia)  
Autism  
Fetal alcohol syndrome

For autism, we identified six studies reporting severity of intellectual disability. We conducted a meta-analysis to produce the following severity distribution which we applied to the prevalence of autism to produce severity-specific ID due to autism.

| ID severity | Mean  | SE    |
|-------------|-------|-------|
| None        | 0.161 | 0.034 |
| Borderline  | 0.161 | 0.034 |
| Mild        | 0.375 | 0.037 |
| Moderate    | 0.190 | 0.031 |
| Severe      | 0.090 | 0.177 |
| Profound    | 0.024 | 0.134 |

We calculated prevalence of idiopathic ID by subtracting all severity- and aetiology-specific IDs from the severity-specific envelope ID assuming the residuals to represent idiopathic. If the residual was less than 5% of the severity-specific envelope, the prevalence of all aetiology-specific IDs were proportionally squeezed to fit within 95% of the envelope, leaving 5% for idiopathic ID.

As we estimated the prevalence of individual aetiology-specific IDs by models from the respective parent causes, the squeezing may result in a distorted balance of prevalence estimates within their parent causes. With the aim to maintain consistencies of prevalence within each of the parent causes, we added the difference between the original and the squeezed prevalence estimates to the “motor impairment” sequela if the squeezed sequela represented “motor and cognitive impairment.” For autism, we obtained the fraction of cases that result in ID from literature (0.29; 0.27–0.30 95% CI) and applied to the subtraction and squeezing processes. We assume all ID cases due to iodine deficiency (cretinism) to result in either severe or profound level, and Klinefelter syndrome cases that result in ID will have either borderline or mild level.

In GBD 2013, all aetiology-specific models were squeezed into the overall (IQ <70) envelope. In 2015, we squeeze each model into its discrete severity envelope. GBD 2016 methods are still in development and will be finalized later this summer.

# Guillain–Barré Syndrome (GBS) Impairment

## Flowchart

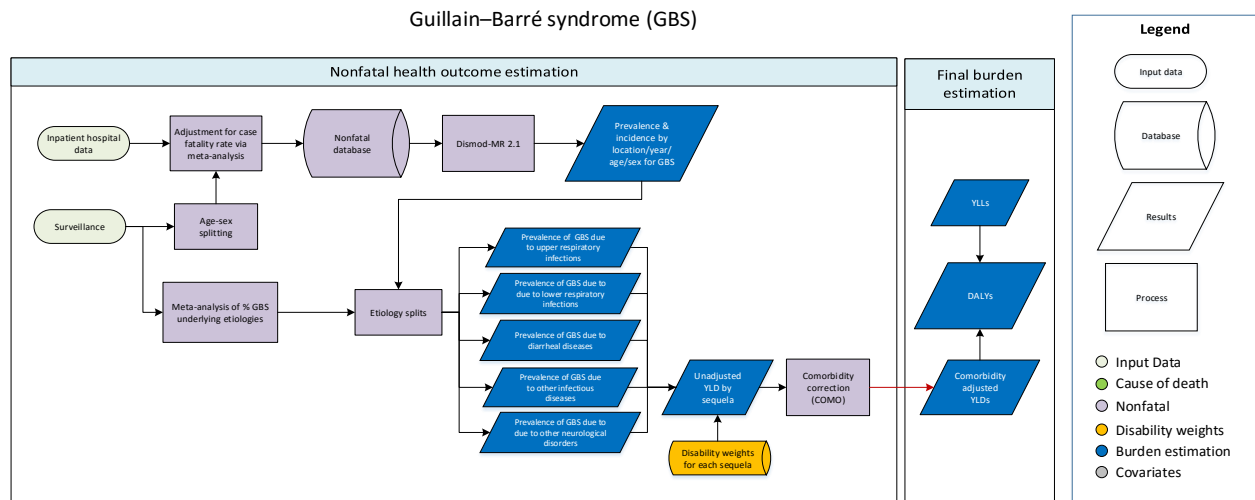

## Case definition

Guillain-Barré syndrome is a rare condition that usually occurs as a complication of respiratory or gastrointestinal infection. It is considered an immune-mediated nerve dysfunction with rapid onset of weakness in feet and hands ascending toward the trunk. In the acute phase about a quarter of cases required mechanical ventilation for survival. The majority of cases fully recover within months to a year. The following ICD codes are used G61.0 (GBS) and 357.0 (Acute infective polyneuritis). These codes are also referenced in Methods Appendix Table 4.

## Input data

### *Model inputs*

A systematic search was performed in Pubmed on 28.01.2010 which produced a systematic review by McGrogan A et al. (2009). The search covered 1980–2008 using keywords “Guillain-Barré Syndrome” or “polyradiculoneuropathy” and “incidence” or “epidemiology.” This review included 63 relevant studies (published between 1980 and 2008) which reported on Guillain-Barré incidence rate and provided the estimated incidence rates for 25 countries in nine GBD regions). There were 35 studies from our systematic review that provided information on the underlying cause: 31 mentioning all of the identified underlying infectious diseases; 26 providing a proportion for upper respiratory infections, three for influenza, 25 for diarrheal disease, and 14 for other diseases.

An additional search was undertaken for more information on mortality, remission, and duration of GBS. As the mortality, remission, and case-fatality rate did not vary significantly across the studies and there were time constraints, instead of doing a systematic search for GBS mortality and remission, a general search was carried out. We extracted case fatality rate from five studies, and remission from four studies.

| measure   | Data sources | Country/Subnational Coverage | GBD World Regions |
|-----------|--------------|------------------------------|-------------------|
| incidence | 61           | 111                          | 9                 |

Updates to systematic reviews are performed on an ongoing schedule across all GBD causes, and an update for Guillain-Barré syndrome will be performed in the next one to two iterations. Inpatient hospital data were extracted using the ICD codes listed above. Only primary diagnoses were considered, with the reasoning that Guillain-Barré syndrome should appear as a primary diagnosis and we do not wish to include follow-up visits that may be listed as secondary or tertiary codes.

We still had some locations with systematically high or low hospital data. In order to systematically outlier hospital data that was implausible, we outliered all data from any sex-specific country-years where the age-standardized rates were higher than 125% of the second highest sex-specific country-year of US hospital data or 75% of the second lowest sex-specific country-year of US hospital data. This assumes US hospital data to be the gold standard of hospital data.

#### *Etiology splits*

Information on etiology splits come from a systematic review and meta-analysis of the literature completed for GBD 2010. This review searched for articles providing information on the proportion of Guillain-Barré cases with any described etiological cause, the proportion of Guillain-Barré cases attributed to influenza, the proportion of Guillain-Barré cases attributed to upper respiratory infections, the proportion of Guillain-Barré cases attributed to diarrheal diseases and the proportion of Guillain-Barré cases attributed to other infections. This review yielded 35 articles; a breakdown of how many articles inform each proportion contributing to the split is provided below:

| Split                        | Number of Sources |
|------------------------------|-------------------|
| All specified etiologies     | 31                |
| Influenza                    | 3                 |
| Upper respiratory infections | 26                |
| Diarrheal diseases           | 25                |
| Other infectious diseases    | 14                |

First the envelope for Guillain-Barré cases due to all specified etiologies is established by doing a meta-analysis on the proportions reported in the studies included. Then, the proportions for each of the other splits are squeezed to fit the envelope created in the all specified meta-analysis. Finally, the difference between all specified and 100% is attributed to other neurological disorders. The final results of these etiology splits are shown below:

| Etiology                     | Mean  | Lower | Upper |
|------------------------------|-------|-------|-------|
| Other neurological disorders | 0.382 | 0.331 | 0.669 |
| Influenza                    | 0.119 | 0.071 | 0.192 |
| Upper respiratory infections | 0.319 | 0.27  | 0.372 |
| Diarrheal diseases           | 0.109 | 0.086 | 0.135 |
| Other infectious diseases    | 0.071 | 0.054 | 0.093 |

### Disability weights

One health state was used for all Guillain-Barré cases. It is described as paralyzed from the waist down, cannot feel or move the legs, and has difficulties with urine and bowel control. The person uses a wheelchair to move around. The disability weight is 0.296 (0.198–0.414).

### Modelling strategy

All data, from both the literature review and hospital extraction, were corrected for the survival rate. A random effects meta-analysis calculated a 95% case fatality rate (95% CI 93–98%). A forest plot showing the results of this meta-analysis is displayed below. As mortality mainly occurs during the acute phase of the disease (usually within four weeks of onset), the pooled survival rate was used to get the incidence of the people surviving after the acute phase of the GBS. Where surveillance data were reported at age groups of over 20 years, we applied the age pattern derived from US MarketScan claims data to age-split the data.

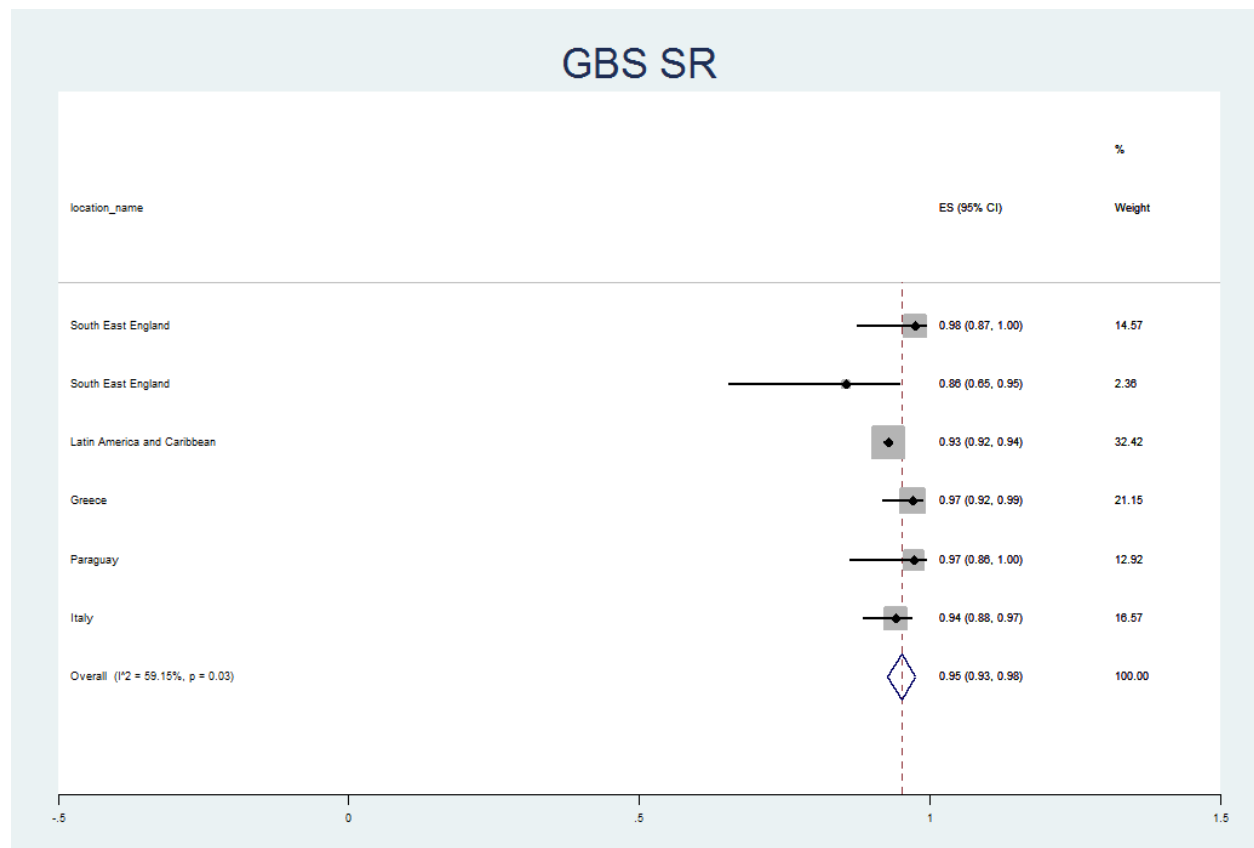

Dismod MR was used to estimate prevalence of Guillain-Barré syndrome for every location, year, age, and sex. We included a study-level covariate on hospital data in order to adjust for a potential systematic bias in this type of data. The exponentiated beta for this covariate was 1.30 (1.26-1.33). We then split the overall prevalence of the impairment by underlying etiology (upper respiratory infections, influenza, diarrheal diseases, other infections, and other neurological causes). We used random effects meta-

analysis to pool these proportions. We squeeze the proportions for influenza, diarrheal diseases, upper respiratory infections, and other infectious diseases to add to the proportion for all identified infectious underlying diseases. We assigned the complement to one of the proportion with any underlying infectious disease to a rest category of “idiopathic Guillain-Barre syndrome” that is classified under neurological disorders.

There are no substantive modelling changes from GBD 2015.



# Pelvic Inflammatory Disease (PID) Impairment

## Flowchart

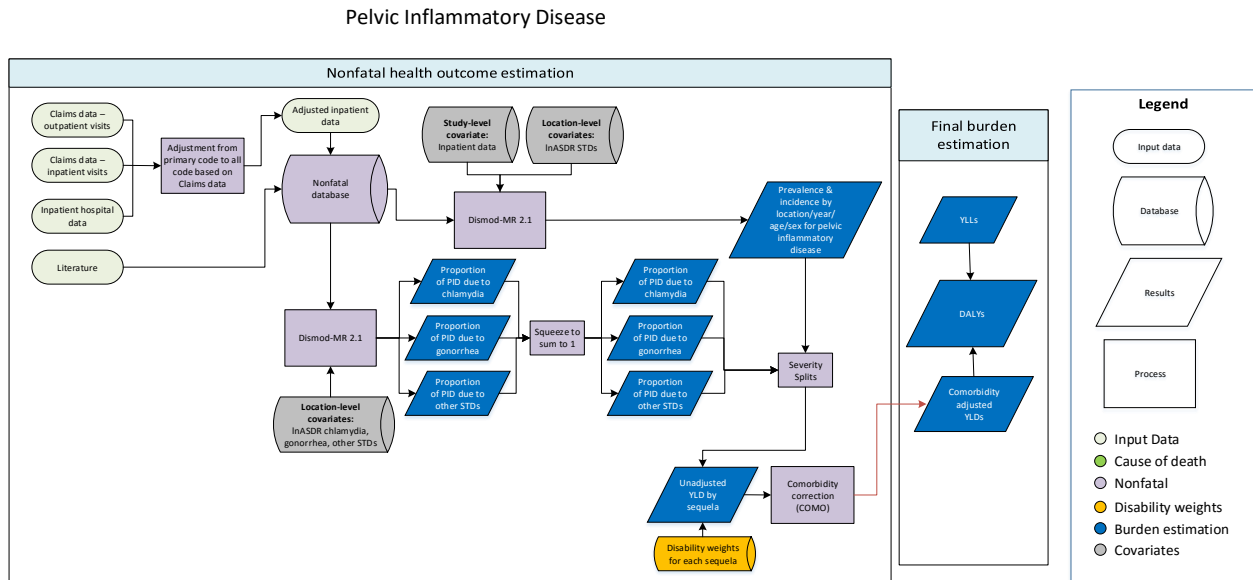

## Case definition

Pelvic inflammatory disease (PID) is an infection of the female reproductive organs presenting as a complication of infection by a sexually transmitted disease. It can irreversibly damage the uterus, fallopian tubes, or other parts of the female reproductive system, leading to infertility.

## Input data

### Model inputs

A systematic review was completed for GBD 2013 on October 28, 2013, using the following search terms:

- (("pelvic inflammatory disease"[Title/Abstract] OR "salpingitis"[Title/Abstract]) AND ("1994"[Date – Publication] : "2013"[Date – Publication]))

In addition, we included studies with confirmed clinical diagnosis in general population.

No systematic review was conducted for GBD 2015. Updates to systematic reviews are performed on an ongoing schedule across all GBD causes, and an update for PID will be performed in the next one to two iterations.

Inpatient outpatient MarketScan data were extracted as incidence rates, as per the ICD codes above. We also extracted inpatient hospital data and employed two crosswalks derived from MarketScan data. First, we adjusted hospital inpatient data using a ratio of primary diagnoses for PID to all diagnoses, since the sexually transmitted disease (rather than PID, the consequent syndrome) may appear as the primary

diagnosis. Second, we adjusted using a ratio of inpatient/outpatient diagnoses, since not all PID must be treated in an inpatient facility. The result is an estimate of total PID incidence.

#### PID incidence input data

The table below illustrates the data sources used in GBD 2016:

| Measure   | Data sources | Subnational coverage | Country coverage | Region coverage | Super-region coverage |
|-----------|--------------|----------------------|------------------|-----------------|-----------------------|
| Incidence | 37           | 86                   | 22               | 6               | 3                     |

A subset of the studies from the systematic review reported the underlying etiology of PID, allowing us to estimate the proportion of PID due to chlamydia, gonorrhea, and other sexually transmitted diseases.

| Proportion of PID due to | data_sources | subnational_coverage | country_coverage | region_coverage | super_region_coverage |
|--------------------------|--------------|----------------------|------------------|-----------------|-----------------------|
| chlamydia                | 15           | 5                    | 8                | 6               | 3                     |
| gonorrhea                | 10           | 5                    | 6                | 4               | 2                     |
| other STDs               | 15           | 5                    | 8                | 6               | 3                     |

#### *Health states and disability weights*

| Health state name                | Health state description                                                                                                      | Disability weight      |
|----------------------------------|-------------------------------------------------------------------------------------------------------------------------------|------------------------|
| Abdominopelvic problem, severe   | This person has severe pain in the belly and feels nauseated. The person is anxious and unable to carry out daily activities. | 0.324<br>(0.219–0.442) |
| Abdominopelvic problem, moderate | This person has pain in the belly and feels nauseated. The person has difficulties with daily activities.                     | 0.114<br>(0.078–0.159) |

## Modelling strategy

First, we estimated the total incidence and prevalence of pelvic inflammatory disease using a Dismod-MR 2.1. We used a study-level covariate on hospital inpatient data. This has the effect of crosswalking inpatient incidence (from hospital inpatient facilities) to total PID incidence (derived from MarketScan inpatient and outpatient claims data). We used the natural log of the age-standardised death rate (lnASDR) of sexually transmitted diseases (excluding HIV) as a location fixed effect, since these diseases cause PID and thus their mortality is correlated to PID incidence. We used Bayesian priors on remission (13–17) and excess mortality rate (0–0.15).

| Covariate                        | Parameter | beta                 | Exponentiated beta |
|----------------------------------|-----------|----------------------|--------------------|
| Hospital inpatient (study-level) | Incidence | 0.65 (-0.77 – -0.59) | 0.52 (0.46–0.56)   |
| lnASDR STDs (location)           | Incidence | -0.65(-0.77 – -0.59) | 0.52 (0.46–0.56)   |

Second, we ran three separate DisMod models for the proportion of PID due to the following three causes: chlamydia, gonorrhea, and other STDs. For each model, we used the lnASDR of the underlying STD.

| Covariate        | Parameter  | Exponentiated beta |
|------------------|------------|--------------------|
| lnASDR chlamydia | Proportion | 1.07 (1.00–1.22)   |
| lnASDR gonorrhea | Proportion | 1.19 (1.02–1.34)   |
| lnASDR STDs      | Proportion | 1.00 (1.00–1.01)   |

DisMod estimate for the proportions due to each etiology were proportionally squeezed to sum to 1.

We extracted MarketScan claims data for the first time in GBD 2015. As described in detail above, this allowed us to make two crosswalks (from primary diagnosis to all diagnoses, and from inpatient to all diagnoses) that we had not previously. In GBD 2013, we only were able to use a ratio of inpatient:outpatient diagnoses from one literature source (Rein et al.). The combined effect of these two crosswalks is that we estimate substantially more PID cases than estimated in GBD 2013.

No additional changes were made to the estimation process for GBD 2016.

## References

1. Rein DB, Kassler WJ, Irwin KL, et al. Direct medical cost of pelvic inflammatory disease and its sequelae: decreasing, but still substantial. *Obstetrics & Gynecology*. 2000;95(3):397–402.

# Heart failure impairment envelope and other cardiovascular disease

## Flowcharts

### Overall modelling strategy

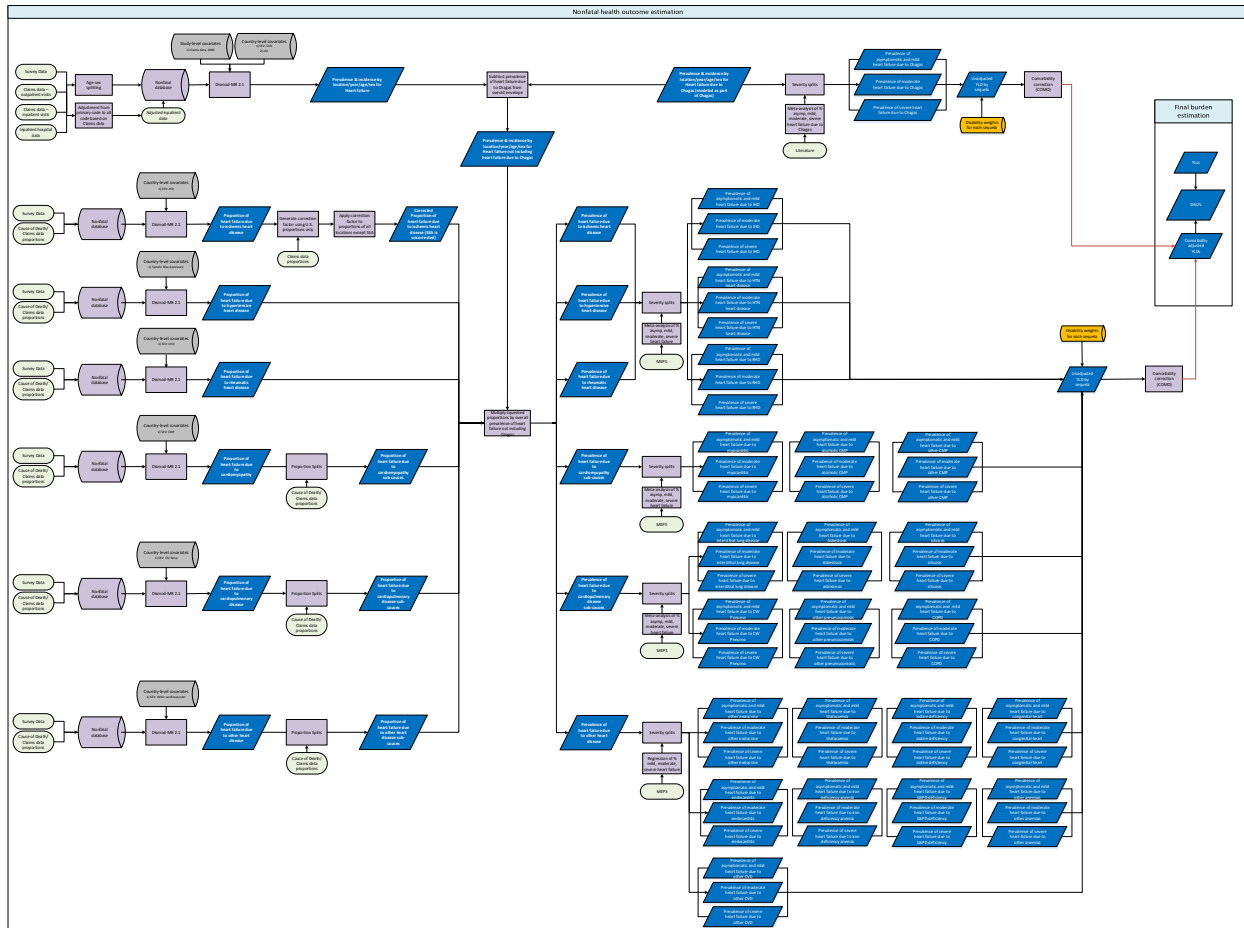

### Proportion splits and correction factor estimation

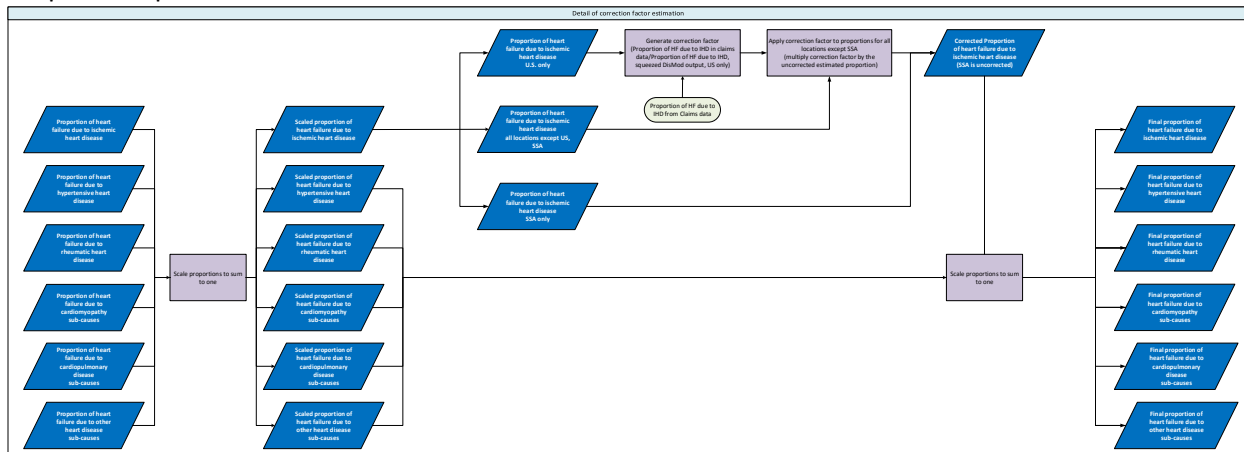

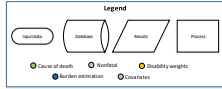

## Case definition

Heart failure was diagnosed clinically using structured criteria such as the Framingham or European Society of Cardiology criteria. Previous iterations of GBD modelled symptomatic (i.e., NYHA Class II and above) episodes of HF only. Beginning in GBD 2016, we used ACC/AHA Stage C and above to capture both persons who are currently symptomatic and those who have been diagnosed with heart failure, but are currently asymptomatic.

Framingham Criteria (1): Must fulfill two major criteria or one major and two minor criteria.

Major criteria: Paroxysmal nocturnal dyspnoea, neck vein distention, rales, radiographic cardiomegaly, acute pulmonary oedema, S3 gallop, increased central venous pressure (>16 cm H<sub>2</sub>O at right atrium), hepatojugular reflux; weight loss >4.5 kg in 5 days in response to treatment

Minor criteria: bilateral ankle oedema, nocturnal cough, dyspnoea on ordinary exertion, hepatomegaly, pleural effusion, decrease in vital capacity by one-third from maximum recorded, tachycardia (heart rate >120 beats/min).

European Society of Cardiology (2):

Typical signs (elevated jugular venous pressure, pulmonary crackles and peripheral oedema) and symptoms (e.g. breathlessness, ankle swelling and fatigue) caused by a structural and/or functional cardiac abnormality, resulting in a reduced cardiac output and/or elevated intracardiac pressures at rest or during stress.

## Input data

### Model inputs

A systematic review was performed for GBD 2016. The search terms used were: "heart failure"[TIAB] AND (epidemiology[MeSH Terms] OR prevalence[TIAB] OR incidence[TIAB] OR mortality[TIAB]) AND ("1990/01/01"[PDAT] : "2016/09/02"[PDAT]) NOT "animal model" NOT rat NOT mice NOT diabetes[TIAB] NOT "renal transplant"[TIAB]. The dates of the search were 01/01/1990 through 09/02/2016. 37,891 initial hits were returned, and 57 sources were added. An unstructured review of the literature yielded an additional 30 sources, of which six were extracted.

A systematic review was not performed for GBD 2015 or GBD 2013; however, the GBD 2010 study had conducted a systematic literature review for heart failure.

### Overall heart failure prevalence

|                        | Prevalence | Incidence | Mortality risk |
|------------------------|------------|-----------|----------------|
| Studies                | 22         | 24        | 53             |
| Countries/subnationals | 18         | 20        | 35             |

|                   |   |   |   |
|-------------------|---|---|---|
| GBD world regions | 7 | 6 | 9 |
|-------------------|---|---|---|

*Heart failure due to ischaemic heart disease*

|                        | Proportion |
|------------------------|------------|
| Studies                | 34         |
| Countries/subnationals | 51         |
| GBD world regions      | 9          |

*Heart failure due to hypertensive heart disease*

|                        | Proportion |
|------------------------|------------|
| Studies                | 35         |
| Countries/subnationals | 38         |
| GBD world regions      | 9          |

*Heart failure due to rheumatic heart disease*

|                        | Proportion |
|------------------------|------------|
| Studies                | 28         |
| Countries/subnationals | 49         |
| GBD world regions      | 11         |

*Heart failure due to cardiomyopathy*

|                        | Proportion |
|------------------------|------------|
| Studies                | 32         |
| Countries/subnationals | 51         |
| GBD world regions      | 10         |

*Heart failure due to cardiopulmonary disease*

|                        | Proportion |
|------------------------|------------|
| Studies                | 12         |
| Countries/subnationals | 10         |
| GBD world regions      | 5          |

*Heart failure due to other cardiovascular and circulatory diseases*

|                        | Proportion |
|------------------------|------------|
| Studies                | 19         |
| Countries/subnationals | 22         |
| GBD world regions      | 6          |

Non-literature data included claims data and GBD 2016 death estimates.

### Severity split inputs

The table below includes lay descriptions and disability weights for the severity levels of heart failure for GBD 2016.

| Severity level | Lay description                                                                                                                                                                                                           | DW (95% CI)         |
|----------------|---------------------------------------------------------------------------------------------------------------------------------------------------------------------------------------------------------------------------|---------------------|
| Mild           | Is short of breath and easily tires with moderate physical activity, such as walking uphill or more than a quarter-mile on level ground. The person feels comfortable at rest or during activities requiring less effort. | 0.041 (0.026–0.062) |
| Moderate       | Is short of breath and easily tires with minimal physical activity, such as walking only a short distance. The person feels comfortable at rest but avoids moderate activity.                                             | 0.072 (0.047–0.103) |
| Severe         | Is short of breath and feels tired when at rest. The person avoids any physical activity, for fear of worsening the breathing problems.                                                                                   | 0.179 (0.122–0.251) |

## Modelling strategy

The general analytical strategy included estimating the overall prevalence of heart failure using DisMod MR 2.1, followed by a multi-step analysis of published literature, claims data, and cause of death data to estimate the aetiological fraction for each cause of heart failure. The latter process includes an initial assessment of the fraction of heart failure cases attributable to each of the high-level parent cause groupings, followed by further division into the detailed causes within each of these groupings, and finally a correction factor applied to adjust these proportions. The selection for aetiological causes was based on a review of the literature and expert opinion regarding diseases that lead to congestive heart failure.

We first estimated an overall prevalence of AHA/ACC stage C or D heart failure using literature data, hospital data, and claims data. Hospital data were adjusted outside of DisMod, using as reference data points reporting prevalence from the literature. Using as a model the adjustment factors developed to translate tobacco consumption prevalence to tobacco consumption frequency, we matched administrative claims data to population-based literature data based on age group, sex, and super region (3). For the adjustment factor, we developed the following generalized additive model on matched data

$$\ln(\mu_{ref,i}) = \beta_0 + \beta_1 \ln(\mu_{b,i}) + s(age_i) + \varepsilon_i$$

Where  $i$  represents a given matched observation,  $age$  signifies the data point's age group,  $s(x)$  represents a penalized spline where the smoothing parameter is chosen through cross validation and  $\mu_{ref}$  and  $\mu_b$  denote the mean of the data point from literature and the mean of the claims data point, respectively. Predictions from the model were then taken as the adjusted data points. The standard error of each corrected data point was adjusted to account for the uncertainty due to the correction.

We set a prior of no remission and capped excess mortality at 1.

Heart failure due to Chagas was modelled separately as part of the Chagas modelling strategy. We subtracted the prevalence of heart failure due to Chagas from the overall heart failure prevalence to give an adjusted prevalence of heart failure due to all other aetiologies.

Our estimation of the aetiological causes of heart failure makes several assumptions and has several limitations. First, we assume that each case of heart failure only has one cause. Second, we rely on claims data from the United States, the only country where detailed person-level claims data were available, to assess the association between heart failure and underlying aetiologies. Third, we rely on mortality estimates due to these underlying causes (regardless of heart failure) to estimate their contribution to heart failure deaths in countries where detailed person-level claims data is not yet available. Fourth, we utilize the association between claims data and death certificate data in the United States to adjust for the differences in coding for ischemic heart disease, the most common cause of heart failure globally, in claims data versus death certificates. This approach allows us to produce estimates for all locations and can be updated to include more detailed health record and claims data from additional locations as they become available.

To estimate the aetiological fractions for each cause, we calculated the proportion of people with a diagnosis of one of the underlying causes of heart failure who also had a diagnosis of heart failure listed using claims data from the United States. These proportions were then multiplied by age-, sex-, and location-specific deaths (post CoDCorrect) to yield an overall number for each underlying cause of heart failure. We then divided these cause-specific totals by the sum of deaths for all aetiologies in order to yield a proportion of deaths due to heart failure for each cause. These proportions, along with literature data, were used to inform DisMod MR 2.1 models for the six broadest and mutually exclusive and collectively exhaustive cause groupings: ischaemic heart disease, hypertensive heart disease, cardiomyopathy and myocarditis, rheumatic heart disease, cardiopulmonary disease, and other cardiovascular and circulatory diseases. An exception to this approach was made for Sub-Saharan Africa where we excluded the proportion estimates generated from claims and death data, relying instead on published literature to determine the proportions of heart failure etiologies. This decision was based on expert opinion that local patterns differed significantly from what would have been determined from claims and death data. The THESUS-HF study, a large-scale, prospective, echocardiographic study of heart failure aetiologies in multiple African countries, provided these proportions (3). The results of these six proportion models were scaled to sum to one.

For heart failure due to cardiopulmonary disease, heart failure due to cardiomyopathy and myocarditis, and heart failure due to other causes, we calculated the proportion for each sub-cause according to the proportion of that cause within each larger aggregate group.

After the initial splitting and scaling steps, we compared the estimated proportions for the United States with the proportions originally calculated from the US claims data. The estimated proportion of HF due to IHD was much higher than the proportion of HF due to IHD in the claims data. This difference was due to the large number of IHD deaths not related to heart failure. In order to correct this over-estimation, we generated a correction factor for HF due to IHD by taking the proportion of HF due to IHD from the claims data and dividing it by the proportion of HF due to IHD from the scaled DisMod results. We then multiplied the proportion of HF due to IHD from the scaled DisMod results by this correction factor for all



locations except Sub-Saharan Africa. Since echocardiographic evidence rather than claims data were used to model HF etiology proportions in Sub-Saharan Africa, we did not adjust the estimated proportion of HF due to IHD for this super region. In the next step, after the proportion of HF due to IHD has been corrected, the proportions were all rescaled to sum to one. These final scaled proportions were then multiplied by the overall HF envelope (after Chagas adjustment) to yield prevalence estimates of HF due to all aetiologies.

These estimates were then split into asymptomatic and mild, moderate, and severe heart failure based on an analysis of MEPS data.

Models were evaluated based on expert opinion, comparison of results with other rounds of GBD, and model fit.

#### *Overall heart failure impairment envelope*

| Study covariate                                  | Parameter             | beta                 | Exponentiated beta |
|--------------------------------------------------|-----------------------|----------------------|--------------------|
| All MarketScan, year 2000                        | Prevalence            | -0.3 (-0.32 – -0.28) | 0.74 (0.72 – 0.76) |
| Log-transformed age-standardised SEV scalar: CVD | Prevalence            | 1.06 (0.98 – 1.12)   | 2.88 (2.67 – 3.07) |
| LDI (I\$ per capita)                             | Excess mortality rate | -0.3 (-0.49 – -0.1)  | 0.74 (0.61 – 0.90) |

#### *Six main sub-cause proportion envelopes*

| Sub-cause                                                           | Covariate                                             | Parameter  | beta                               | Exponentiated beta |
|---------------------------------------------------------------------|-------------------------------------------------------|------------|------------------------------------|--------------------|
| Heart failure due to cardiomyopathy impairment envelope             | Log-transformed age-standardised SEV scalar: CMP      | Proportion | 0.75 (0.75 – 0.76)                 | 2.12 (2.12 – 2.14) |
| Heart failure due to cardiopulmonary disease impairment envelope    | Log-transformed age-standardised SEV scalar: Chr Resp | Proportion | 0.81 (0.79 – 0.83)                 | 2.25 (2.20 – 2.30) |
| Heart failure due to hypertensive heart disease impairment envelope | Systolic blood pressure (mmHg)                        | Proportion | 0.000010<br>(0.0000023 – 0.000015) | 1.00 (1.00 – 1.00) |
| Heart failure due to ischaemic heart disease impairment envelope    | Log-transformed age-standardised SEV scalar: IHD      | Proportion | 0.75 (0.75 - 0.75)                 | 2.12 (2.12 – 2.12) |
| Heart failure due to other causes impairment envelope               | Log-transformed SEV scalar: Oth Cardio                | Proportion | 0.75 (0.75 – 0.75)                 | 2.12 (2.12 – 2.12) |
| Heart failure due to valvular heart disease impairment envelope     | Log-transformed age-standardised SEV scalar: CVD      | Proportion | 0.75 (0.75 – 0.75)                 | 2.12 (2.12 – 2.12) |

No other significant changes were made to the modelling strategy for GBD 2016.

1) [http://www.framinghamheartstudy.org/share/protocols/soe0\\_03s\\_protocol.pdf](http://www.framinghamheartstudy.org/share/protocols/soe0_03s_protocol.pdf)

2) 2016 ESC Guidelines for the diagnosis and treatment of acute and chronic heart failure: The Task Force for the diagnosis and treatment of acute and chronic heart failure of the European Society of Cardiology (ESC) Developed with the special contribution of the Heart Failure Association (HFA) of the ESC. *Eur Heart J* 2016; 37 (27): 2129-2200.

3) Reitsma, Marissa B., et al. "Smoking prevalence and attributable disease burden in 195 countries and territories, 1990–2015: a systematic analysis from the Global Burden of Disease Study 2015." *The Lancet*.

4) Damasceno A, Mayosi BM, Sani M, Ogah OS, Mondo C, Ojji D, Dzudie A, Kouam CK, Suliman A, Schrueder N, Yonga G, Ba SA, Maru F, Alemayehu B, Edwards C, Davison BA, Cotter G, Sliwa K. The Causes, Treatment, and Outcome of Acute Heart Failure in 1006 Africans From 9 Countries. Results of the Sub-Saharan Africa Survey of Heart Failure. *Arch Intern Med*. 2012;172(18):1386-1394.

# Vision Impairment

## Flowcharts

### Vision Impairment

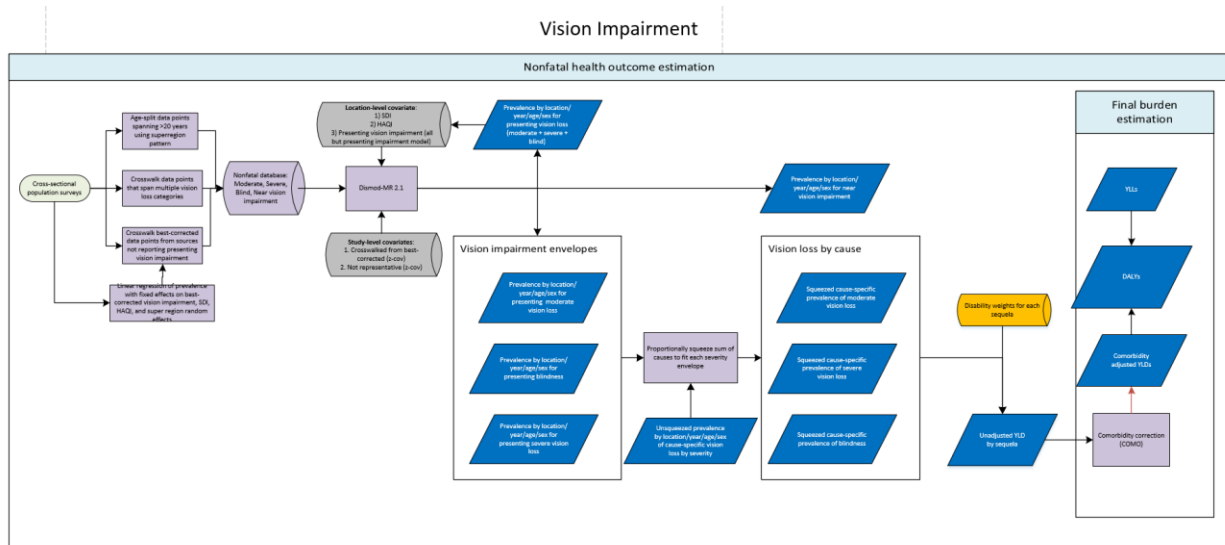

# Diabetic Retinopathy

## Diabetic retinopathy

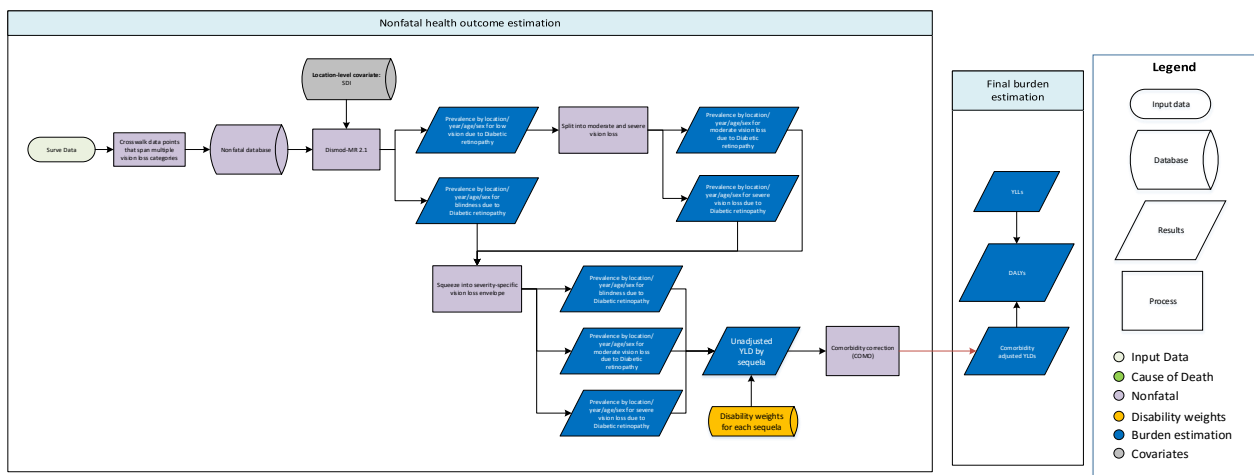

# Macular Degeneration

## Macular degeneration

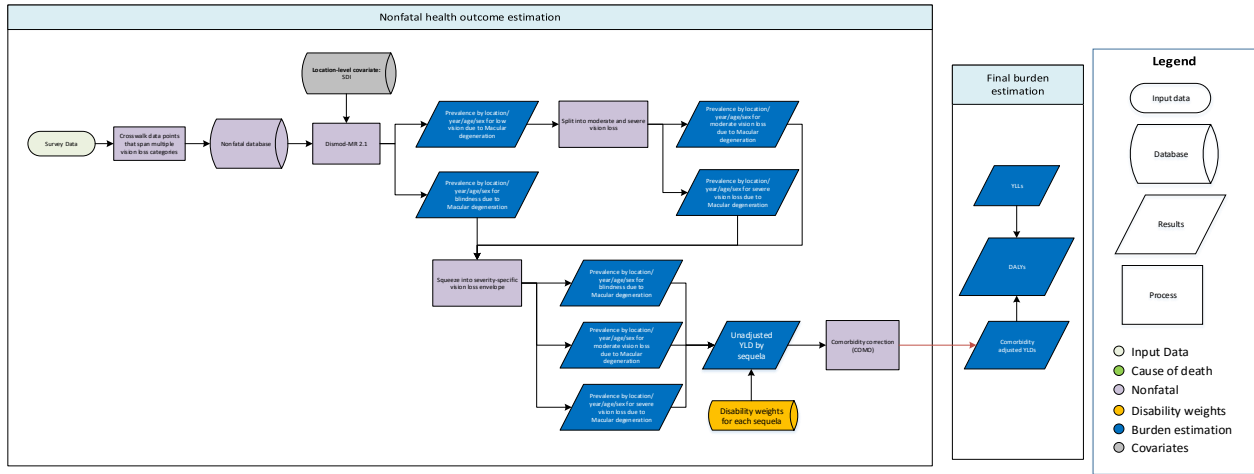

# Cataract

## Cataract

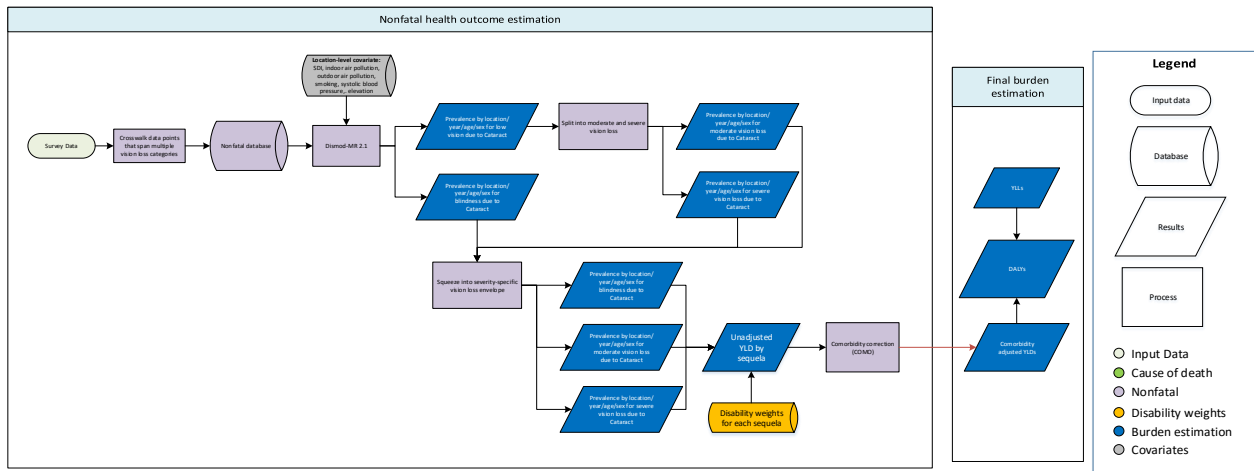

# Glaucoma

## Glaucoma

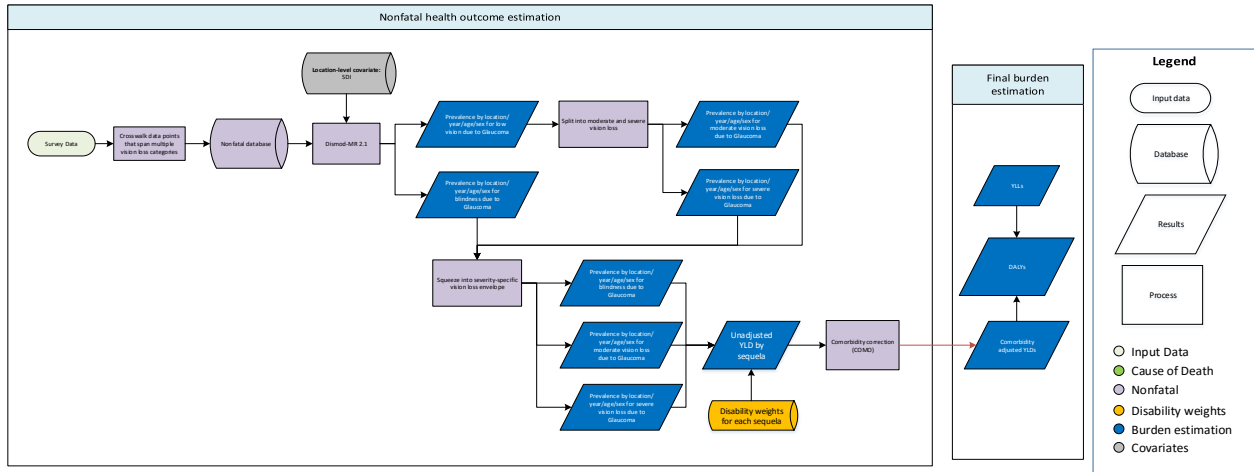

# Trachoma

## Trachoma

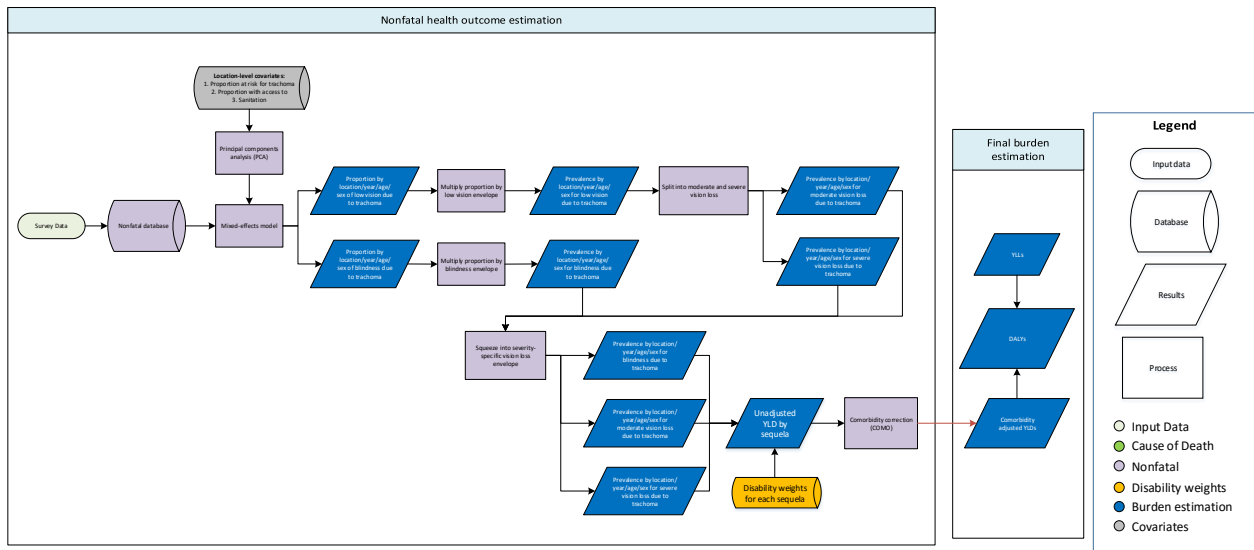

## Other vision loss

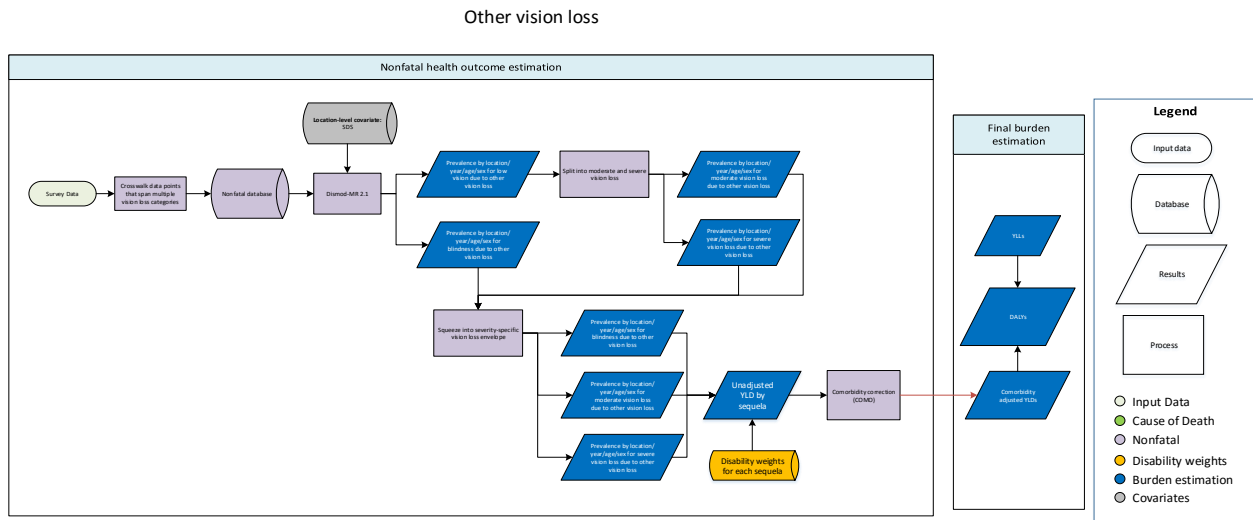

## Case definition

We model vision impairment as visual acuity <6/18 according to the Snellen chart. The following impairments are modeled:

| Condition                       | Case definition                                                     |
|---------------------------------|---------------------------------------------------------------------|
| Blindness                       | Visual acuity of <3/60 or <10% visual field around central fixation |
| Severe vision impairment        | ≥3/60 and <6/60                                                     |
| Moderate vision impairment      | ≥6/60 and <6/18                                                     |
| Near vision impairment envelope | Near visual acuity of <6/18 distance equivalent                     |

Near vision impairment describes the progressive inability to focus on near objects as individuals age, and is also called presbyopia. This impairs the ability to read. The majority of presbyopia can be corrected by the use of reading glasses, contact lenses, or refractive surgery.

We model vision impairment due to the following causes: uncorrected refractive error, cataract, glaucoma, macular degeneration, diabetic retinopathy, trachoma, Vitamin A deficiency, retinopathy of prematurity, meningitis, encephalitis, onchocerciasis, and other vision loss. Vision loss due to vitamin A deficiency, retinopathy of prematurity, meningitis, encephalitis, and onchocerciasis are modelled as part of their underlying cause as described in their respective sections.

Refractive error is blurry vision due to the lens's inability to focus. The blurriness caused by refractive error can be addressed through the use of contact lenses, glasses, or refractive surgery. Cataract is

clouding of the lens of the eye due to protein buildup that impairs vision. Glaucoma is a condition with increased intraocular pressure which can lead to damage of the optic nerve. Macular degeneration is a deterioration of the macula, leading to central vision loss. Diabetic retinopathy is damage to the retina caused by damaged blood vessels that can leak blood into the retina and cause scarring of the retina. Trachoma results from a conjunctival bacterial infection (*Chlamydia trachomatis*) that produces inflammation and scarring which leads to an inversion of the eyelids and eyelashes scratching the cornea, which eventually leads to scarring of the cornea and vision impairment or blindness.

## Input data

### *Model inputs*

Data on overall vision impairment come from surveys measuring visual acuity in representative population-based studies, either from publications in peer-reviewed and grey literature or surveys for which we had the unit record data. Data were excluded if no test was used of visual acuity that can be converted to the Snellen scale, and if a study did not assess “presenting” or “best-corrected” vision. A subset of these studies that reported vision loss by cause were used to estimate the prevalence of vision loss due to cataract, glaucoma, macular degeneration, diabetic retinopathy, and other causes.

For GBD 2015, we conducted a systematic review for new sources since GBD 2013 (covering 1/1/2013 – 5/20/2015), using the following search string:

```
(((glaucoma[Title/Abstract] OR cataract[Title/Abstract] OR macular[Title/Abstract] OR 'refractive error'[Title/Abstract] OR presbyopia[Title/Abstract]) OR (('blindness'[MeSH Terms] OR 'blindness'[All Fields]) OR 'vision, low'[MeSH Terms])) AND ('2013'[PDAT] : '3000'[PDAT])) AND 'humans'[MeSH Terms] AND (prevalence[Title/Abstract] OR incidence[Title/Abstract] OR epidemiology[Title/Abstract])
```

This yielded 1,169 results, of which we extracted 20 sources. Furthermore, we extracted from the following nationally representative surveys measuring visual acuity: the WHO Studies on Global Ageing and Adult Health (SAGE) and the United States National Health and Examination Surveys (NHANES).

For GBD 2016, we did a comprehensive extraction of the Rapid Assessment of Avoidable Blindness (RAAB) repository (<http://raabdata.info/>), a database of vision impairment studies in developing settings across the world. There are 266 site-years of data, the majority of which have publicly available reports or publications of the data. A standardized methodology was used by all sources in the repository, allowing inclusion of all available reports. In addition, we added two state-level national surveys from India.

Due to the sparse literature reporting measured near-vision visual acuity, we also extracted data from the following nationally representative studies measuring self-reported near vision loss: SAGE; NHANES; the Surveys of Health, Ageing, and Retirement in Europe (SHARE); the Multi-Country Survey Study on Health and Responsiveness (MCSS); and the World Health Surveys (WHS).

Several adjustments were made to raw data.

- 1) Where studies reported visual acuity spanning multiple thresholds (eg, <6/60, rather than separate severe and blind estimates), we crosswalked using ratios predicted by a linear regression on age, using data from studies reporting vision loss by each severity.

- 2) Some studies reported best-corrected vision impairment, but not presenting vision impairment (PVI). We crosswalked these data points using a linear regression of logit-transformed PVI prevalence with fixed effects on best-corrected VI, healthcare quality and access index (HAQI) and Socio-demographic Index (SDI) and super-region random effects. This gave us a predicted PVI data points for these studies not explicitly reporting PVI. These crosswalked data points were flagged with a study-level covariate that increased standard error in DisMod.
- 3) Where data points spanned more than 20 years of age, we age-split using an algorithm that applies the age-pattern of the super-region to split the data to five-year age groups.

Whereas other vision impairment aetiologies are modelled based on prevalence data, vision impairment due to trachoma is modelled as a proportion of the overall vision impairment envelope, a strategy that was chosen based on the nature of available data.

### *Health states and disability weights*

| Health state name                    | Health state description                                                                                                                                                                    | Disability weight      |
|--------------------------------------|---------------------------------------------------------------------------------------------------------------------------------------------------------------------------------------------|------------------------|
| Distance vision, severe impairment   | This person has severe vision loss, which causes difficulty in daily activities, some emotional impact (for example, worry), and some difficulty going outside the home without assistance. | 0.184<br>(0.125–0.259) |
| Distance vision, moderate impairment | This person has vision problems that make it difficult to recognize faces or objects across a room.                                                                                         | 0.031<br>(0.019–0.049) |
| Distance vision blindness            | This person is completely blind, which causes great difficulty in some daily activities, worry and anxiety, and great difficulty going outside the home without assistance.                 | 0.187<br>(0.124–0.26)  |
| Presbyopia                           | This person has difficulty seeing things that are nearer than 3 feet, but has no difficulty with seeing things at a distance.                                                               | 0.011<br>(0.005–0.02)  |

## Modelling strategy

We modelled the prevalence of vision loss in two steps. In the first step, we estimated the total prevalence estimates of presenting vision loss: moderate vision impairment, severe vision impairment, blindness, and near vision impairment (presbyopia). We directly derived prevalence of near vision impairment from this step, whereas the remaining three models that reflect different severity levels of distance vision loss continued to the next step.

### 1) Estimate severity-specific vision impairment (the “envelopes”)

First, we ran five DisMod-MR 2.1 models to estimate the total prevalence estimates of presenting vision loss: moderate vision impairment, severe vision impairment, blindness, near vision impairment (presbyopia), and presenting vision impairment (moderate + severe + blindness). The presenting vision impairment model was used as a covariate in the severity-specific models to improve consistency across severities.

Betas and exponentiated values, which can be interpreted as an odds ratio, are shown in the table below for each covariate. The best-corrected covariate indicates whether the test measures visual acuity with the level of correction the patient presents with (`best_corrected = 0`) or the ophthalmologist provides additional correction via pinhole (`best_corrected = 1`). Rapid-assessment corrects for potential biases in cause-specific vision loss from studies using expedited visual acuity measurement. Socio-demographic



Index (SDI) and healthcare access and quality index (HAQI) are used as location covariates as a proxy measure of access to eye care such as cataract surgery. Non-representative studies are those not representative at the level they are used to model (eg, a state-level survey assigned to a country), including a z-cov adjusts for potential bias. Data points that were crosswalked from best-corrected visual acuity are flagged with a z-cov to adjust uncertainty in the crosswalk process. Non-standard severity definition is used to crosswalk between the self-report questionnaire of SHARE (nonstandard) and the other surveys, including SAGE and NHANES, which are crosswalked to examination data using the self-reported covariate.

| Model                                        | Covariate name                                    | Type                    | Measure    | Beta value               | Exponentiated value   |
|----------------------------------------------|---------------------------------------------------|-------------------------|------------|--------------------------|-----------------------|
| Vision impairment due to glaucoma unsqueezed | Socio-demographic Index                           | Country covariate       | Prevalence | -0.235 (-0.690 - -0.008) | 0.791 (0.502 - 0.992) |
| Vision impairment due to glaucoma unsqueezed | diagnostic rapid assessment of loss               | Study-level x-covariate | Prevalence | 0.012 (0.002 - 0.033)    | 1.012 (1.002 - 1.033) |
| Vision impairment due to glaucoma unsqueezed | Not representative                                | Study-level z-covariate | Prevalence | 0.022 (0.003 - 0.067)    | 1.023 (1.003 - 1.069) |
| Blindness due to glaucoma unsqueezed         | Socio-demographic Index                           | Country covariate       | Prevalence | -0.256 (-0.690 - -0.010) | 0.775 (0.501 - 0.990) |
| Blindness due to glaucoma unsqueezed         | diagnostic rapid assessment of loss               | Study-level x-covariate | Prevalence | 0.010 (0.000 - 0.030)    | 1.010 (1.000 - 1.030) |
| Blindness due to glaucoma unsqueezed         | Not representative                                | Study-level z-covariate | Prevalence | 0.024 (0.000 - 0.085)    | 1.025 (1.000 - 1.089) |
| Vision impairment due to cataract unsqueezed | Elevation Over 1500m (proportion)                 | Country covariate       | Prevalence | 0.119 (0.006 - 0.319)    | 1.127 (1.006 - 1.376) |
| Vision impairment due to cataract unsqueezed | Indoor Air Pollution (All Cooking Fuels)          | Country covariate       | Prevalence | 0.031 (0.000 - 0.111)    | 1.032 (1.000 - 1.118) |
| Vision impairment due to cataract unsqueezed | Outdoor Air Pollution (PM2.5)                     | Country covariate       | Prevalence | 0.008 (0.003 - 0.014)    | 1.008 (1.003 - 1.014) |
| Vision impairment due to cataract unsqueezed | Smoking Prevalence (Age-standardized, both sexes) | Country covariate       | Prevalence | 0.776 (0.035 - 1.675)    | 2.174 (1.036 - 5.340) |
| Vision impairment due to cataract unsqueezed | Socio-demographic Index                           | Country covariate       | Prevalence | -0.612 (-0.962 - -0.157) | 0.542 (0.382 - 0.855) |
| Vision impairment due to cataract unsqueezed | Systolic Blood Pressure (mmHg)                    | Country covariate       | Prevalence | 0.002 (0.000 - 0.007)    | 1.002 (1.000 - 1.007) |

|                                                          |                                                   |                         |            |                          |                       |
|----------------------------------------------------------|---------------------------------------------------|-------------------------|------------|--------------------------|-----------------------|
| Vision impairment due to cataract unsqueezed             | diagnostic rapid assessment of loss               | Study-level x-covariate | Prevalence | 0.031 (0.009 - 0.063)    | 1.031 (1.009 - 1.065) |
| Vision impairment due to cataract unsqueezed             | Not representative                                | Study-level z-covariate | Prevalence | 0.014 (0.003 - 0.039)    | 1.014 (1.003 - 1.039) |
| Blindness due to cataract unsqueezed                     | Elevation Over 1500m (proportion)                 | Country covariate       | Prevalence | 0.641 (0.420 - 0.868)    | 1.898 (1.522 - 2.382) |
| Blindness due to cataract unsqueezed                     | Indoor Air Pollution (All Cooking Fuels)          | Country covariate       | Prevalence | 0.408 (0.143 - 0.660)    | 1.504 (1.153 - 1.936) |
| Blindness due to cataract unsqueezed                     | Outdoor Air Pollution (PM2.5)                     | Country covariate       | Prevalence | 0.000 (0.000 - 0.001)    | 1.000 (1.000 - 1.001) |
| Blindness due to cataract unsqueezed                     | Smoking Prevalence (Age-standardized, both sexes) | Country covariate       | Prevalence | 0.757 (0.036 - 1.723)    | 2.132 (1.036 - 5.601) |
| Blindness due to cataract unsqueezed                     | Socio-demographic Index                           | Country covariate       | Prevalence | -0.965 (-1.000 - -0.864) | 0.381 (0.368 - 0.421) |
| Blindness due to cataract unsqueezed                     | Systolic Blood Pressure (mmHg)                    | Country covariate       | Prevalence | 0.002 (0.000 - 0.008)    | 1.002 (1.000 - 1.009) |
| Blindness due to cataract unsqueezed                     | diagnostic rapid assessment of loss               | Study-level x-covariate | Prevalence | 0.002 (0.000 - 0.009)    | 1.002 (1.000 - 1.009) |
| Blindness due to cataract unsqueezed                     | Not representative                                | Study-level z-covariate | Prevalence | 0.004 (0.000 - 0.010)    | 1.004 (1.000 - 1.010) |
| Vision impairment due to macular degeneration unsqueezed | Socio-demographic Index                           | Country covariate       | Prevalence | 0.350 (-0.432 - 0.921)   | 1.419 (0.650 - 2.512) |
| Vision impairment due to macular degeneration unsqueezed | diagnostic rapid assessment of loss               | Study-level x-covariate | Prevalence | 0.047 (0.005 - 0.126)    | 1.049 (1.005 - 1.134) |
| Vision impairment due to macular degeneration unsqueezed | Not representative                                | Study-level z-covariate | Prevalence | 0.058 (0.008 - 0.150)    | 1.060 (1.008 - 1.162) |
| Blindness due to macular degeneration unsqueezed         | Socio-demographic Index                           | Country covariate       | Prevalence | 0.328 (-0.563 - 0.959)   | 1.389 (0.570 - 2.609) |
| Blindness due to macular degeneration unsqueezed         | diagnostic rapid assessment of loss               | Study-level x-covariate | Prevalence | 0.016 (0.002 - 0.050)    | 1.016 (1.002 - 1.052) |
| Blindness due to macular degeneration unsqueezed         | Not representative                                | Study-level z-covariate | Prevalence | 0.014 (0.001 - 0.047)    | 1.014 (1.001 - 1.048) |

|                                                                              |                                     |                         |            |                         |                       |
|------------------------------------------------------------------------------|-------------------------------------|-------------------------|------------|-------------------------|-----------------------|
| Near vision impairment due to presbyopia due to uncorrected refractive error | Socio-demographic Index             | Country covariate       | Prevalence | -1.803 (-1.999 - 1.451) | 0.165 (0.135 - 0.234) |
| Near vision impairment due to presbyopia due to uncorrected refractive error | Non-standard severity definition    | Study-level x-covariate | Prevalence | -0.195 (-0.200 - 0.186) | 0.822 (0.819 - 0.830) |
| Near vision impairment due to presbyopia due to uncorrected refractive error | Self-reported                       | Study-level x-covariate | Prevalence | -0.102 (-0.120 - 0.089) | 0.903 (0.886 - 0.915) |
| Vision impairment due to other vision loss unsqueezed                        | Socio-demographic Index             | Country covariate       | Prevalence | -0.113 (-0.351 - 0.006) | 0.893 (0.704 - 0.994) |
| Vision impairment due to other vision loss unsqueezed                        | diagnostic rapid assessment of loss | Study-level x-covariate | Prevalence | 0.054 (0.012 - 0.103)   | 1.056 (1.012 - 1.109) |
| Vision impairment due to other vision loss unsqueezed                        | Not representative                  | Study-level z-covariate | Prevalence | 0.186 (0.126 - 0.239)   | 1.205 (1.135 - 1.270) |
| Blindness due to other vision loss unsqueezed                                | Socio-demographic Index             | Country covariate       | Prevalence | -0.179 (-0.472 - 0.005) | 0.836 (0.624 - 0.995) |
| Blindness due to other vision loss unsqueezed                                | diagnostic rapid assessment of loss | Study-level x-covariate | Prevalence | 0.164 (0.123 - 0.211)   | 1.178 (1.131 - 1.235) |
| Blindness due to other vision loss unsqueezed                                | Not representative                  | Study-level z-covariate | Prevalence | 0.057 (0.019 - 0.107)   | 1.059 (1.020 - 1.113) |
| Vision impairment envelope                                                   | Socio-demographic Index             | Country covariate       | Prevalence | -1.899 (-1.997 - 1.605) | 0.150 (0.136 - 0.201) |
| Blindness impairment envelope                                                | Healthcare access and quality index | Country covariate       | Prevalence | -0.020 (-0.024 - 0.013) | 0.980 (0.976 - 0.987) |
| Blindness impairment envelope                                                | Presenting vision impairment        | Country covariate       | Prevalence | 0.506 (0.291 - 0.743)   | 1.659 (1.337 - 2.102) |
| Blindness impairment envelope                                                | Socio-demographic Index             | Country covariate       | Prevalence | -0.115 (-0.345 - 0.002) | 0.891 (0.708 - 0.998) |
| Blindness impairment envelope                                                | Not representative                  | Study-level z-covariate | Prevalence | 0.000 (0.000 - 0.002)   | 1.000 (1.000 - 1.002) |
| Blindness impairment envelope                                                | best-corrected crosswalk            | Study-level z-covariate | Prevalence | 0.002 (0.000 - 0.007)   | 1.002 (1.000 - 1.007) |
| Moderate vision impairment envelope                                          | Presenting vision impairment        | Country covariate       | Prevalence | 0.775 (0.668 - 0.868)   | 2.170 (1.951 - 2.383) |
| Moderate vision impairment envelope                                          | Socio-demographic Index             | Country covariate       | Prevalence | -0.041 (-0.170 - 0.000) | 0.960 (0.844 - 1.000) |

|                                                                           |                                                   |                         |            |                         |                          |
|---------------------------------------------------------------------------|---------------------------------------------------|-------------------------|------------|-------------------------|--------------------------|
| Moderate vision impairment envelope                                       | Not representative                                | Study-level z-covariate | Prevalence | 0.000 (0.000 - 0.002)   | 1.000 (1.000 - 1.002)    |
| Moderate vision impairment envelope                                       | best-corrected crosswalk                          | Study-level z-covariate | Prevalence | 0.160 (0.130 - 0.194)   | 1.174 (1.139 - 1.214)    |
| Severe vision impairment envelope                                         | Presenting vision impairment                      | Country covariate       | Prevalence | 0.509 (0.383 - 0.636)   | 1.664 (1.466 - 1.889)    |
| Severe vision impairment envelope                                         | Socio-demographic Index                           | Country covariate       | Prevalence | -0.018 (-0.056 - 0.001) | 0.983 (0.945 - 0.999)    |
| Severe vision impairment envelope                                         | Not representative                                | Study-level z-covariate | Prevalence | 0.001 (0.000 - 0.003)   | 1.001 (1.000 - 1.003)    |
| Severe vision impairment envelope                                         | best-corrected crosswalk                          | Study-level z-covariate | Prevalence | 0.034 (0.011 - 0.062)   | 1.035 (1.011 - 1.064)    |
| Vision impairment due to diabetes mellitus                                | Diabetes Age-Standardized Prevalence (proportion) | Country covariate       | Prevalence | 1.465 (0.673 - 2.255)   | 4.328 (1.961 - 9.535)    |
| Vision impairment due to diabetes mellitus                                | Socio-demographic Index                           | Country covariate       | Prevalence | -1.192 (-1.957 - 0.132) | 0.304 (0.141 - 0.876)    |
| Vision impairment due to diabetes mellitus                                | diagnostic rapid assessment of loss               | Study-level x-covariate | Prevalence | 0.011 (0.000 - 0.036)   | 1.011 (1.000 - 1.036)    |
| Vision impairment due to diabetes mellitus                                | Not representative                                | Study-level z-covariate | Prevalence | 0.089 (0.005 - 0.239)   | 1.093 (1.005 - 1.270)    |
| Blindness due to diabetes mellitus unsqueezed                             | Diabetes Age-Standardized Prevalence (proportion) | Country covariate       | Prevalence | 3.805 (3.352 - 3.993)   | 44.905 (28.560 - 54.217) |
| Blindness due to diabetes mellitus unsqueezed                             | Socio-demographic Index                           | Country covariate       | Prevalence | -1.594 (-1.989 - 0.597) | 0.203 (0.137 - 0.550)    |
| Blindness due to diabetes mellitus unsqueezed                             | diagnostic rapid assessment of loss               | Study-level x-covariate | Prevalence | 0.070 (0.002 - 0.230)   | 1.072 (1.002 - 1.259)    |
| Blindness due to diabetes mellitus unsqueezed                             | Not representative                                | Study-level z-covariate | Prevalence | 0.373 (0.193 - 0.586)   | 1.453 (1.213 - 1.796)    |
| Moderate vision impairment due to uncorrected refractive error unsqueezed | Socio-demographic Index                           | Country covariate       | Prevalence | -0.955 (-0.998 - 0.830) | 0.385 (0.369 - 0.436)    |
| Severe vision impairment due to uncorrected refractive error unsqueezed   | Socio-demographic Index                           | Country covariate       | Prevalence | -0.899 (-0.996 - 0.621) | 0.407 (0.369 - 0.538)    |

|                                                          |                         |                   |            |                          |                       |
|----------------------------------------------------------|-------------------------|-------------------|------------|--------------------------|-----------------------|
| Blindness due to uncorrected refractive error unsqueezed | Socio-demographic Index | Country covariate | Prevalence | -0.968 (-1.000 - -0.870) | 0.380 (0.368 - 0.419) |
|----------------------------------------------------------|-------------------------|-------------------|------------|--------------------------|-----------------------|

**2) Estimate cause-specific vision impairment**

In the second step, we estimated the prevalence of vision loss due to multiple causes: refractive error, cataract, glaucoma, macular degeneration, diabetic retinopathy, retinopathy due to prematurity, trachoma, vitamin A deficiency, onchocerciasis, meningitis, and other causes not classified elsewhere. The vision loss due to retinopathy of prematurity, vitamin A deficiency, onchocerciasis, meningitis, tetanus, and neonatal conditions was modeled as part of these underlying causes. Vision loss due to trachoma is modelled as a proportion of the envelope, with separate proportion models for vision impairment and blindness. For each of cataract, glaucoma, macular degeneration, diabetic retinopathy, and other vision loss, we ran two DisMod-MR 2.1 models: one for the combined category of moderate and severe vision loss due to the cause, and one for blindness due to the cause. Moderate and severe vision loss were modelled together because input data were mostly available for the aggregate. Refractive error was modelled in three models, one for each severity. We used the following age restrictions:

| Cause                | Minimum age |
|----------------------|-------------|
| Cataracts            | 20          |
| Glaucoma             | 45          |
| Macular degeneration | 45          |
| Diabetic retinopathy | 20          |
| Trachoma             | 15          |
| Other vision loss    | 0           |

For the cataract model, we used known risk factors – hypertension, smoking, air pollution, and elevation.

For cataract and refractive error, we used presenting vision impairment as a covariate, as these are the main causes of vision impairment and are treatable and thus should have greater covariance with overall vision impairment than less common causes such as glaucoma or macular degeneration.

We estimated the proportions of low vision and blindness due to trachoma using custom mixed-effects models. For consistency, the two models (blindness and low vision) were parameterized identically and differ only in their input data. Our model included fixed effects on age (using cubic splines with knots at 0, 40, and 100 years of age), sex, and a covariate derived from a principal components analysis of the proportion of the population at risk for trachoma and the proportion of the population with access to sanitation. We included nested random effects on super-region, region, and country. Finally, we applied geographic and age restrictions to ensure that we estimate zero proportions in non-endemic locations and among those younger than 15 year of age (as scarring of the cornea due to trachoma takes decades to develop). The prevalence of trachoma at each severity level was calculated by multiplying the proportion of vision loss (vision impairment or blindness) due to trachoma by the corresponding best-corrected vision loss envelope.

We split the moderate plus severe vision loss estimates for each cause into moderate and severe using the ratio of best-corrected moderate and severe vision loss envelopes. As exceptions, onchocerciasis and retinopathy of prematurity were modelled for moderate and severe vision loss as part of the estimation process of these causes.

We scaled the cause-specific vision loss prevalence to the total prevalence of the best-corrected vision loss envelopes for each of the three severity levels. The final result is prevalence of vision loss due to each cause by severity.

The following changes have been implemented since GBD 2015:

- DisMod is not designed to handle wide-age data points – by age-splitting the input data we improve model fits.
- In the severity-specific vision impairment models, we use overall presenting vision impairment as a covariate, ensuring greater consistency between severities.
- In GBD 2013 vision impairment models, best-corrected vision data were crosswalked within DisMod using a single beta for all ages and locations. By crosswalking the input data, we allow the ratio between presenting and best-corrected vision impairment to vary with age and location.
- In GBD 2013, we estimated the ratio of vision impairment due to refractive error. In 2016, we are estimating the prevalence of refractive error, as it shows greater covariance with predictors such as SDI and HAQI. This allows the second step (squeezing causes to the envelopes) to include refractive error as an input.

# Hearing Impairment

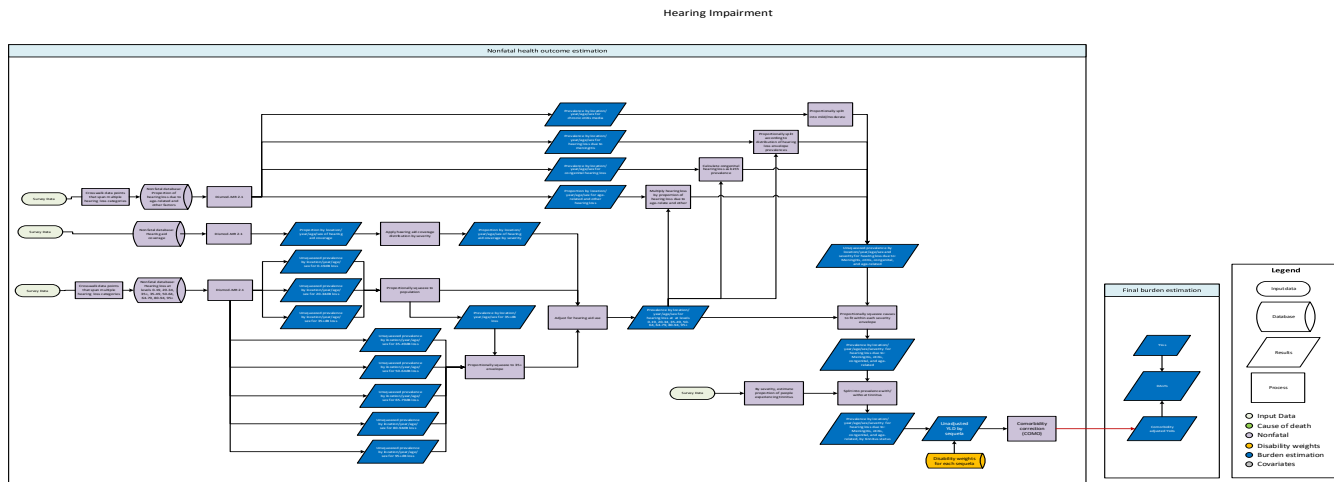

## Case definition

For GBD 2016, hearing impairment modeled the following severities of hearing loss:

| Severity thresholds of interest for hearing loss |                         |
|--------------------------------------------------|-------------------------|
| Severity                                         | Threshold (in decibels) |
| None                                             | 0–19                    |
| Mild                                             | 20–34                   |
| Moderate                                         | 35–49                   |
| Moderately severe                                | 50–64                   |
| Severe                                           | 65–79                   |
| Profound                                         | 80–94                   |
| Complete                                         | 95+                     |

We model the following causes of hearing loss: congenital, meningitis, otitis, and age-related and other hearing loss. Hearing loss due to meningitis and otitis are modelled as part of their underlying cause as described in their respective sections. Congenital hearing loss is defined as hearing loss present at birth. Age-related and other hearing loss includes causes not identified as meningitis, otitis, or congenital. This includes presbycusis, the gradual increase in hearing loss over age frequently caused by the natural breakdown of neurons in the inner ear. For all causes, we estimate hearing loss with and without tinnitus, the perception of noise or ringing in the ears.

## Input data

*Model inputs*

For the estimation of the severity-specific envelopes, we used a series of systematic reviews and survey extraction. Data sources up to 2008 were identified by a published systematic review (<http://www.ncbi.nlm.nih.gov/pubmed/19444763>). A systematic review covering 2008–2013 was conducted with the following search terms:

(hearing impairment[Title/Abstract] OR deafness[Title/Abstract] OR hearing loss[Title/Abstract]) AND (prevalence[Title/Abstract]) AND ("2008"[PDAT] : "3000"[PDAT]) AND (cross sectional OR survey)

In addition, we extracted hearing loss measurement from the United States National Health and Examination Surveys (NHANES). Self-reported data, from both the literature and surveys, were excluded. This includes censuses in the Integrated Public Use Microdata Series (IPUMS), the WHO Studies on Global Ageing and Adult Health (SAGE), and the WHO Multi-Country Survey Study on Health and Responsiveness (MCSS). Systematic reviews and self-reported survey data (including MCSS, SAGE, and NHANES) were used to estimate hearing aid coverage.

For GBD 2016, we conducted a systematic review on November 30, 2016, using the following search terms:

(hearing impairment[Title/Abstract] OR deafness[Title/Abstract] OR hearing loss[Title/Abstract] OR audiometry[Title/Abstract]) AND (prevalence[Title/Abstract]) AND ("2008/11/26"[PDAT] : "3000"[PDAT]) AND (cross sectional OR survey)

This returned 239 results, of which 17 were accepted.

Where studies reported hearing loss spanning multiple thresholds (eg, 80+, rather than 80-94 and 95+), we crosswalked using ratios predicted by a linear regression on age, using NHANES microdata. Where studies reported severity categories that did not align with GBD thresholds, we crosswalked using NHANES microdata to the nearest GBD severity category, as long as the upper and lower thresholds were not more than 10dB different.

#### *Health states and disability weights*

| Health state name                             | Health state description                                                                                                                                                                                                                                              | Disability weight      |
|-----------------------------------------------|-----------------------------------------------------------------------------------------------------------------------------------------------------------------------------------------------------------------------------------------------------------------------|------------------------|
| Hearing loss, mild                            | This person has great difficulty hearing and understanding another person talking in a noisy place (for example, on an urban street).                                                                                                                                 | 0.01<br>(0.004–0.019)  |
| Hearing loss, mild, with ringing              | This person is unable to hear and understand another person talking, even in a quiet place, is unable to take part in a phone conversation. Difficulties with communicating and relating to others cause emotional impact at times (for example worry or depression). | 0.021<br>(0.012–0.036) |
| Hearing loss, moderate                        | This person has great difficulty hearing and understanding another person talking in a noisy place (for example, on an urban street), and sometimes has annoying ringing in the ears.                                                                                 | 0.027<br>(0.015–0.042) |
| Hearing loss, moderate, with ringing          | This person is unable to hear and understand another person talking, even in a quiet place, and has great difficulty hearing anything in any other situation. Difficulties with communicating and relating to others often cause worry, depression or loneliness.     | 0.074<br>(0.048–0.107) |
| Hearing loss, moderately severe               | (custom DW from hearing loss impairment envelope)                                                                                                                                                                                                                     | 0.092<br>(0.064–0.129) |
| Hearing loss, moderately severe, with ringing | (custom DW from hearing loss impairment envelope)                                                                                                                                                                                                                     | 0.167<br>(0.114–0.231) |



|                                      |                                                                                                                                                                                                                                                                        |                        |
|--------------------------------------|------------------------------------------------------------------------------------------------------------------------------------------------------------------------------------------------------------------------------------------------------------------------|------------------------|
| Hearing loss, severe                 | This person is unable to hear and understand another person talking in a noisy place (for example, on an urban street), and has difficulty hearing another person talking even in a quiet place or on the phone.                                                       | 0.158<br>(0.104–0.227) |
| Hearing loss, severe, with ringing   | This person is unable to hear and understand another person talking, even in a quiet place, has great difficulty hearing anything in any other situation, Difficulties with communicating and relating to others often cause worry, depression, or loneliness.         | 0.261<br>(0.174–0.361) |
| Hearing loss, profound               | This person is unable to hear and understand another person talking in a noisy place, has difficulty hearing another person talking even in a quiet place or on the phone, and has annoying ringing in the ears for 5 minutes at a time, almost every day.             | 0.204<br>(0.134–0.288) |
| Hearing loss, profound, with ringing | This person cannot hear at all in any situation, including even the loudest sounds, and cannot communicate verbally or use a phone. Difficulties with communicating and relating to others often cause worry, depression or loneliness.                                | 0.277<br>(0.182–0.388) |
| Hearing loss, complete               | This person is unable to hear and understand another person talking, even in a quiet place, and unable to take part in a phone conversation. Difficulties with communicating and relating to others cause emotional impact at times (for example worry or depression). | 0.215<br>(0.143–0.307) |
| Hearing loss, complete, with ringing | This person cannot hear at all in any situation, including even the loudest sounds, and cannot communicate verbally or use a phone. Difficulties with communicating and relating to others often cause worry, depression or loneliness.                                | 0.316<br>(0.211–0.436) |

## Modelling strategy

We modelled the prevalence of hearing loss over five steps. First, we ran three DisMod-MR 2.1 models to estimate the total prevalence estimates of hearing loss: normal hearing (0–19dB), mild hearing loss (20–34dB), and moderate hearing loss and above (35+ dB). We squeezed the prevalence estimates from these DisMod-MR 2.0 models to fit within the entire population of each country. We estimated prevalence of normal hearing for this squeezing purpose only, and hence did not form part of further analysis. Betas and exponentiated values, which can be interpreted as an odds ratio, are shown in the table below for each covariate.

| Model                                           | Covariate name          | Type              | Measure    | Beta value               | Exponentiated value   |
|-------------------------------------------------|-------------------------|-------------------|------------|--------------------------|-----------------------|
| Hearing loss impairment at 35+ dB               | Socio-demographic Index | Country covariate | Prevalence | -1.451 (-1.984 - -0.486) | 0.234 (0.138 - 0.615) |
| Hearing loss impairment at 95+ dB               | Socio-demographic Index | Country covariate | Prevalence | -0.584 (-1.595 - -0.024) | 0.557 (0.203 - 0.976) |
| Hearing aids (proportion of total hearing loss) | LDI (I\$ per capita)    | Country covariate | Prevalence | 0.726 (0.498 - 0.979)    | 2.066 (1.646 - 2.662) |
| Hearing loss impairment at 0-19 dB              | Socio-demographic Index | Country covariate | Prevalence | 0.058 (0.001 - 0.182)    | 1.059 (1.001 - 1.200) |

Second, we ran five additional DisMod-MR 2.1 models for each severity levels of hearing loss above mild: moderate (35–49dB), moderately severe (50–64dB), severe (65–79dB), profound (80–94dB), and complete (95+). We then squeezed the prevalence estimates from these models to fit within the prevalence that were estimated for 35+dB in the first step. By the end of the second step, we had estimated prevalence of six severity levels of hearing loss, including mild (20–34dB). We also ran a DisMod-MR 2.0 model for the coverage of hearing aids, using (logged) lag distributed income (LDI) as a covariate.

Third, we adjusted the prevalence of each severity level by accounting for hearing aids. We assumed the use of hearing aids reduced the severity by one level. Data obtained from a survey in Norway provided detailed information on people with hearing aids, which was used to estimate the proportion of hearing

aids for each severity level. We ran a log-linear regression on age with binary indicator for severity levels. We calculated country-specific hearing aid coverage by multiplying the severity-specific coverage in Norway by the ratio of hearing aid coverage in a given country to that of Norway for each age-sex. We shifted the identified fraction of people in each severity level a level below, except for complete hearing loss, which we assumed was not correctable by hearing aids. This provided the adjusted prevalence of six severity levels of all-cause hearing loss.

Fourth, we estimated the prevalence of hearing loss due to multiple causes: otitis media, congenital, meningitis (pneumococcal, H influenza type B meningitis, meningococcal, and other bacterial), and age-related and other causes not classified elsewhere. For congenital hearing loss, we assumed that all hearing losses occurring at the time of birth are of congenital nature. We assumed that all hearing loss due to otitis media is at the mild or moderate level. We implemented proportional squeezes to scale cause-specific hearing loss prevalence to the total prevalence of each severity level.

Finally, we estimated the percent of people experiencing tinnitus for at least five minutes per day by severity level using data from the NHANES and two datasets from the United Kingdom. We calculated confidence intervals assuming a binomial distribution. We assumed the same distribution of tinnitus across all types of hearing loss.

## Section 10. Modeling specific methods on risk factor estimation

# Unsafe Water Capstone Appendix

## Flowchart

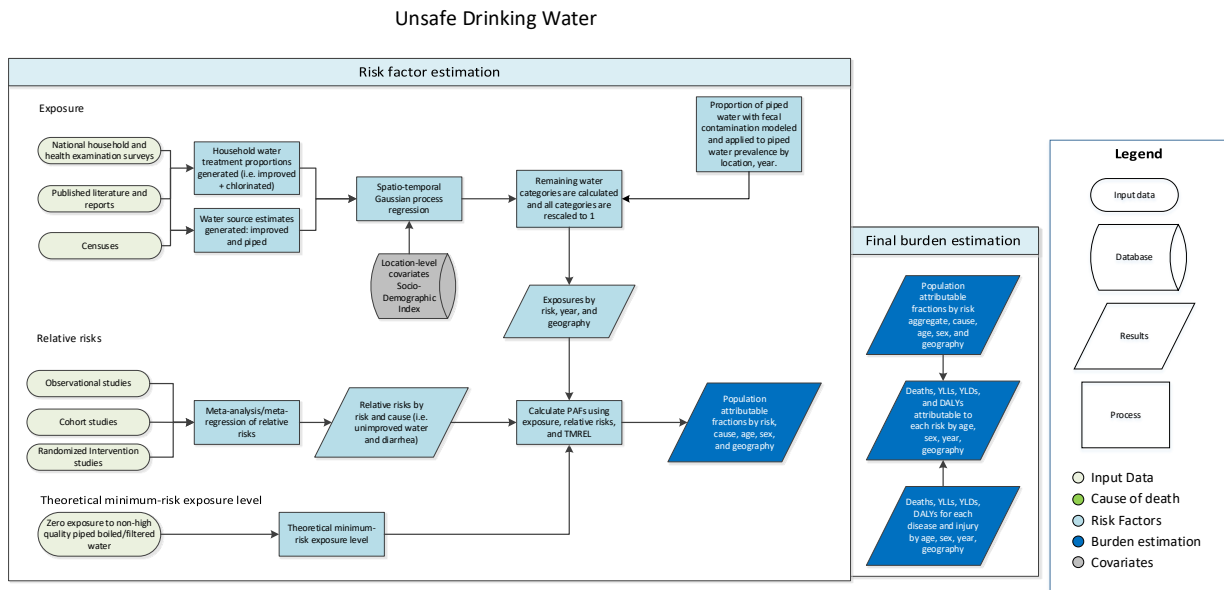

## Input Data & Methodological Summary

### Exposure

#### Case Definition

For GBD 2016, exposure to unsafe water is defined based on reported primary water source used by the household and use of household water treatment (HWT) to improve the quality of drinking water before consumption. Water sources were defined as “improved” based on the JMP designation (The WHO), which includes piped water as improved water, and households with access to piped water connection to the house, yard, or plot were defined as having access to piped water supply. One exception to this classification is that bottled water is considered “unimproved” by the JMP, however we treat it as an “improved” source. Solar treatment, chlorine treatment, boiling, or the use of filters were all assumed to be effective point-of-use household water treatments, and based on effect sizes published by Wolf et al. (2014) boiling or filtering was the most effective form of water treatment.

#### Input Data

The search for usable household surveys and censuses was conducted using the Global Health Data Exchange (GHDx) database. All surveys through December 2016 that provide household level micro-data on water source were added. Tabulated and report data was lower priority and was only updated when time permitted. HWT input data was limited to two large survey series (DHS and MICS) due to time constraints. An update to HWT input data is a top priority for estimating exposure to unsafe water in future iterations.

#### Modeling

Water source data is modeled in two distinct categories: household prevalence of improved water (excluding piped) and household prevalence of piped water. HWT is modeled in 6 distinct categories based on the 3 water treatment categories (filtered/boiled, solar/chlorine, or untreated) and 2 water

source categories (piped or improved). One modeling change made for GBD 2016 was to model prevalence of piped water independent of the improved water envelope, as was done in GBD 2015. By year and location, each of the above categories are modeled using a 3-step modeling scheme of mixed effect linear regression followed by spatio-temporal Gaussian process regression (ST-GPR), which outputs full time series estimates for each GBD 2016 location. Socio-demographic index (SDI), an index metric that includes a measure of education and income level, was used as a fixed effect in the linear regression since it proved to have significant coefficients. Random effects were placed at GBD 2016 region and super-region levels.

The process of vetting and validating models was accomplished primarily through an examination of ST-GPR scatter plots by GBD 2016 location from 1990-2016. Any unfitting data points were re-inspected for error at the level of extraction and survey implementation, and subsequently excluded from analysis if deemed appropriate. In addition to SDI, a number of different potential fixed effects were considered, including lag-distributed income and urbanicity, but SDI proved to be the strongest predictor of unsafe water. Uncertainty in the estimates was initially formed based on standard deviation by survey, then propagated through ST-GPR modeling by means of confidence intervals around each data point that reflect the point-estimate specific variance.

Once models are vetted, full time series outputs from ST-GPR modeling are then converted from proportion to prevalence by year and geography and then rescaled to form 9 mutually exclusive categories that sum up to 1. The table below provides the final result of this rescaling.

| <i>Category</i>                             | <i>Definition</i>                                                                                                                                     |
|---------------------------------------------|-------------------------------------------------------------------------------------------------------------------------------------------------------|
| Unimproved, no HWT                          | Proportion of households that use unimproved source, and <i>do not</i> use any HWT to purify their drinking water.                                    |
| Unimproved, chlorine/solar                  | Proportion of households that use unimproved source, and solar or chlorine treatment to purify their drinking water.                                  |
| Unimproved, boil/filter                     | Proportion of households that use unimproved source, and boil or filter to purify their drinking water.                                               |
| Improved water except piped, no HWT         | Proportion of households that use improved sources other than piped water supply, and <i>do not</i> use any HWT to purify their drinking water.       |
| Improved water except piped, chlorine/solar | Proportion of households that use improved sources other than piped water supply, and use solar or chlorine treatment to purify their drinking water. |
| Improved water except piped, boil/filter    | Proportion of households that use improved sources other than piped water supply, and boil/filter their drinking water.                               |
| Piped water, no boil/filter                 | Proportion of households that use piped water supply, and <i>do not</i> use any HWT to purify their drinking water                                    |
| Piped water, chlorine/solar                 | Proportion of households that use piped water supply, and <i>use</i> solar or chlorine water treatment to purify their drinking water.                |

|                          |                                                                                                         |
|--------------------------|---------------------------------------------------------------------------------------------------------|
| Piped water, boil/filter | Proportion of households that use piped water supply, and boil or filter to purify their drinking water |
|--------------------------|---------------------------------------------------------------------------------------------------------|

In previous GBD iterations, high income countries were assumed to have no risk of unsafe water. For GBD 2016, we estimated the risk of unsafe water in high income countries as well. Additionally, we modeled the microbiological quality of piped water sources primarily using data a review by Bain et al. (2014) that measured proportion of piped water sources contaminated with fecal indicators. We use the value generated from this model to split the prevalence of piped water into basic piped water and high quality piped water by location, year, age, and sex.

A substantial limitation in our analysis is the paucity of data on HWT and piped water quality. The inclusion of more location-specific data on water treatment utilization at the household level can greatly improve our estimates in future iterations.

### Theoretical minimum-risk exposure level

The theoretical minimum-risk exposure level for unsafe water is defined as all households have access to high quality piped water that has been boiled or filtered before drinking.

### Relative risks

Notable updates were made to the relative risks for unsafe water from GBD 2015. For GBD 2016, there is only 1 adverse health outcome paired with unsafe water, which is diarrheal disease. Note that previously typhoid fever and paratyphoid fever were also included as outcomes but were excluded this round due to the lack of direct evidence. A meta-analysis by Wolf et al. (2014) provided the bulk of the relative risk evidence for the relationship between unsafe water and diarrheal diseases. This meta-analysis was updated through a literature review that searched for related intervention studies post-2014 conducted in PubMed. Search terms used were identical to those provided by Wolf et al. (2014). Relative risk values for water-source interventions and point-of-use treatment interventions were calculated separately so the combined effect of a source intervention and point-of-use intervention was assumed to be multiplicative in order to match GBD 2016 exposure definitions. Please refer to appendix tables for more information on relative risk values and citations.

### References

1. "Improved and Unimproved Water Sources and Sanitation Facilities." *WHO / UNICEF Joint Monitoring Programme: Wat/san Categories*. The WHO/UNICEF, n.d. Web. 08 June 2016
2. Wolf, Jennyfer, Annette Prüss-Ustün, Oliver Cumming, Jamie Bartram, Sophie Bonjour, Sandy Cairncross, Thomas Clasen, John M. Colford, Valerie Curtis, Jennifer De France, Lorna Fewtrell, Matthew C. Freeman, Bruce Gordon, Paul R. Hunter, Aurelie Jeandron, Richard B. Johnston, Daniel Mäusezahl, Colin Mathers, Maria Neira, and Julian P. T. Higgins. "Systematic Review: Assessing the Impact of Drinking Water and Sanitation on Diarrhoeal Disease in Low- and Middle-income Settings: Systematic Review and Meta-regression." *Trop Med Int Health Tropical Medicine & International Health* 19.8 (2014): 928-42. Web.
3. Bain, R., Cronk, R., Wright, J., Yang, H., Slaymaker, T., & Bartram, J. (2014). Fecal Contamination of Drinking-Water in Low- and Middle-Income Countries: A Systematic Review and Meta-Analysis. *PLoS Medicine*, 11(5). doi:10.1371/journal.pmed.1001644

# Unsafe Sanitation Capstone Appendix

## Flowchart

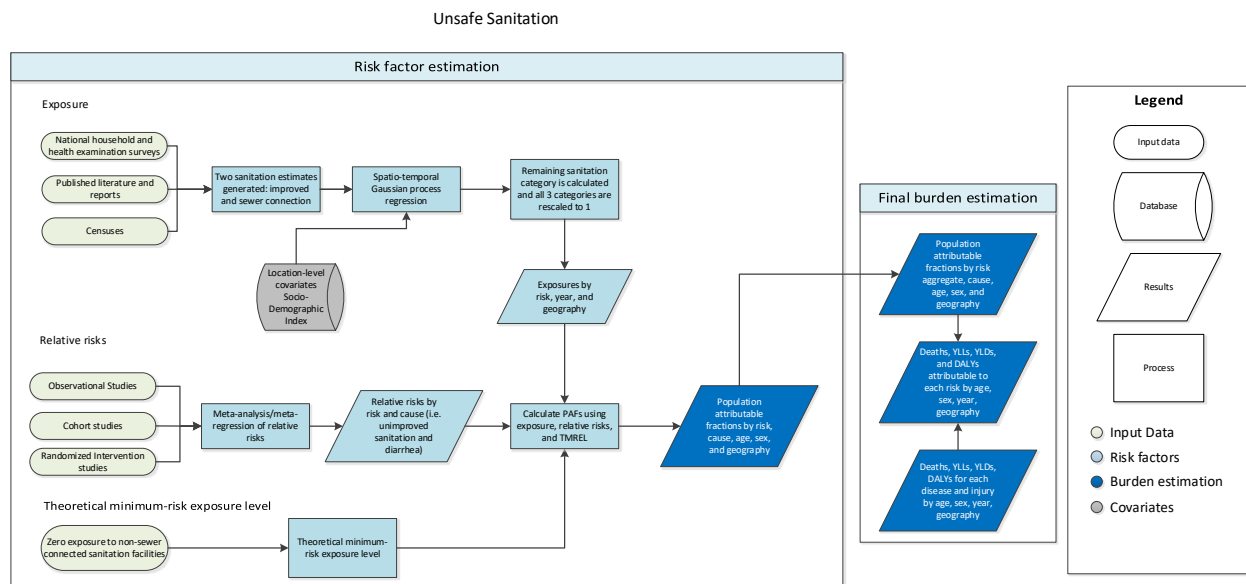

## Input Data & Methodological Summary

### Exposure

#### Case Definition

Exposure to unsafe sanitation were defined based on the primary toilet type used by households. Improved facilities are defined as such based on JMP designation (WHO). Sewer connection toilets included flush toilets or any toilet with connection to the sewer or septic tank.

#### Input Data

The search for usable household surveys and censuses was conducted using the Global Health Data Exchange (GHDx) database. Searches were conducted from October 2016 to December 2016, with the final search household level micro-data on toilet type conducted December 2016. Due to the organized nature of the GHDx, the only search term used was “unsafe sanitation”, which yielded just under 1400 results, of which 795 were extracted and used as inputs for modeling. Tabulated and report data was lower priority and was only updated when time permitted.

#### Modeling

One modeling change made in GBD 2016 was that proportion of households with sewer connection is modeled independently, instead of within the “improved” sanitation envelope. Two distinct models were produced from sanitation data: prevalence of households with improved sanitation and the prevalence of households with a sewer connection. By each location-year, both models were generated using a 3-step modeling scheme of mixed effect linear regression followed by spatio-temporal Gaussian process regression (ST-GPR), which outputs full time series estimates for each GBD 2016 location. Socio-demographic index (SDI), an index metric that includes a measure of education and income level, was used as a fixed effect in the linear regression since it proved to have significant coefficients. Random effects were placed at GBD 2016 region and super-region levels.

The process of vetting and validating models was accomplished primarily through an examination of ST-GPR scatter plots by GBD 2016 location from 1990-2016. Any unfitting data points were re-inspected for error at the level of extraction and survey implementation, and subsequently excluded from analysis if deemed appropriate. In addition to SDI, a number of different potential fixed effects were considered, including lag-distributed income and urbanicity, but SDI proved to be the strongest predictor of unsafe sanitation. Uncertainty in the estimates was initially formed based on standard deviation by survey, then propagated through ST-GPR modeling by means of confidence intervals around each data point that reflect the point-estimate specific variance.

Once models were fully vetted, full time series outputs from ST-GPR modeling were rescaled to form 3 mutually exclusive categories that sum up to 1. The table below provides the final result of this rescaling.

| <i>Category</i>                             | <i>Definition</i>                                                                                    |
|---------------------------------------------|------------------------------------------------------------------------------------------------------|
| Unimproved sanitation                       | Proportion of households that use unimproved sanitation facilities.                                  |
| Improved sanitation, excluding sewer        | Proportion of households that use improved sanitation facilities except those with sewer connection. |
| Sanitation facilities with sewer connection | Proportion of households that use toilet facilities with sewer connection.                           |

In previous GBD iterations, high income countries were assumed to have no risk of unsafe sanitation. For GBD 2016, we estimate the risk of unsafe sanitation in high income countries as well. One limitation that extends to the other two risk factors that comprise WaSH (unsafe water and unsafe hygiene) and can be improved upon in future iterations is taking into account covariance of access to water, sanitation and handwashing facilities. Currently, all 3 components of WaSH were modeled independently, which may lead to an overestimation of the burden of WaSH risk factors.

### Theoretical minimum-risk exposure level

The theoretical minimum-risk exposure level for unsafe sanitation was defined as all households have access to a sanitation facility with sewer connection. Since it was assumed that all households in high-income countries have access to sewer-connected sanitation, this counterfactual exposure level is applied to all households in high-income countries.

### Relative risks

Notable updates were made to the relative risks for unsafe sanitation from GBD 2015. For GBD 2016, there was only 1 adverse health outcome paired with unsafe sanitation, which was diarrheal disease. Note that previously typhoid fever and paratyphoid fever were also included as outcomes but were excluded this round due to the lack of direct evidence. A meta-analysis by Wolf et al. 2014 provides the bulk of the relative risk evidence for the relationship between unsafe sanitation and diarrheal diseases. This meta-analysis was updated through a literature review that searched for related intervention studies post-2014 conducted in PubMed. Search terms used were identical to those provided by Wolf et al. 2014. Please refer to appendix tables for more information on relative risk values and citations.



## References

1. "Improved and Unimproved Water Sources and Sanitation Facilities." *WHO / UNICEF Joint Monitoring Programme: Wat/san Categories*. The WHO/UNICEF, n.d. Web. 08 June 2016
2. Wolf, Jennyfer, Annette Prüss-Ustün, Oliver Cumming, Jamie Bartram, Sophie Bonjour, Sandy Cairncross, Thomas Clasen, John M. Colford, Valerie Curtis, Jennifer De France, Lorna Fewtrell, Matthew C. Freeman, Bruce Gordon, Paul R. Hunter, Aurelie Jeandron, Richard B. Johnston, Daniel Mäusezahl, Colin Mathers, Maria Neira, and Julian P. T. Higgins. "Systematic Review: Assessing the Impact of Drinking Water and Sanitation on Diarrhoeal Disease in Low- and Middle-income Settings: Systematic Review and Meta-regression." *Trop Med Int Health Tropical Medicine & International Health* 19.8 (2014): 928-42. Web.

# Unsafe Hygiene Capstone Appendix

## Flowchart

### Unsafe Handwashing

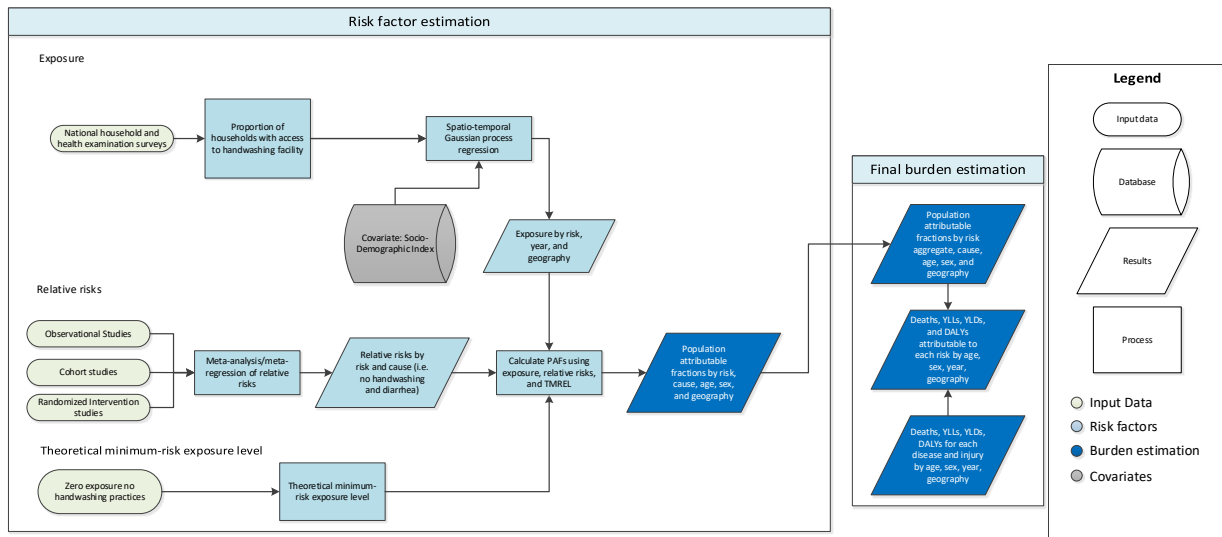

## Input Data & Methodological Summary

### Exposure

#### Case Definition

Lack of access to handwashing facility is defined access to a handwashing station with available soap and water. We estimated the burden of unsafe handwashing in both developed and developing settings.

#### Input Data

Since water and soap availability data were very limited, only country-specific Demographic Health Surveys (DHS) and Malaria Indicator Survey Series (MICS) conducted after 2006 were able to be used as input data.

#### Modeling Strategy

By year and location, proportion of households with handwashing facility is modeled using a 3-step modeling scheme of mixed effect linear regression followed by spatio-temporal Gaussian process regression (ST-GPR), which outputs full time series estimates for each GBD 2016 location. Socio-demographic index (SDI), an index metric that includes a measure of education and income level, was used as a fixed effect in the linear regression since it proved to have significant coefficients. Random effects were placed at GBD 2016 region and super-region levels.

The process of vetting and validating models was accomplished primarily through an examination of ST-GPR scatter plots by GBD 2016 location from 1990-2016. Any unreasonable data points were re-inspected for error at the level of extraction and survey implementation, and subsequently excluded from analysis if deemed appropriate. In addition to SDI, a number of different potential fixed effects

were considered, including lag-distributed income and urbanicity, however SDI proved to be the strongest predictor.

A considerable limitation for when estimating handwashing practices for over 190 independent locations around the world was data sparseness. Even when data were published on handwashing prevalence, the definition was often altered from the GBD 2016 standard definition or it may only have pertained to certain populations (such as hospital patients) and lacked representativeness at the geographic scale we required. The incorporation of questions about soap and water availability in DHS and MICS added much-needed information but there remains a large data gap that must be filled if we are to become more certain in handwashing access estimates.

### Theoretical minimum-risk exposure level

The theoretical minimum-risk exposure level for unsafe hygiene is defined as all households engaging in handwashing with soap practices after any contact with excreta, including children's excreta.

### Relative risks

Notable updates were made to the relative risks for unsafe water from GBD 2015. For GBD 2016, there were 2 adverse health outcome paired with unsafe water: diarrheal disease and lower respiratory infection. Note that previously typhoid fever and paratyphoid fever were also included as outcomes but were excluded this round due to the lack of direct evidence. A meta-analysis by Cairncross et al. (2010) provided relative risk evidence for the relationship between lack of facility access and diarrheal diseases. A meta-analysis by Rabie and Curtis (2006) provided relative risk evidence for the relationship between lack of facility access and lower respiratory infection. Please refer to appendix tables for more information on relative risk values and citations.

### References

1. Cairncross, S., Hunt, C., Boisson, S., Bostoen, K., Curtis, V., Fung, I. C., & Schmidt, W. P. (2010). Water, sanitation and hygiene for the prevention of diarrhoea. *International Journal of Epidemiology*, 39(Supplement 1), I193-I205. doi:10.1093/ije/dyq035
2. Rabie, T., & Curtis, V. (2006). Handwashing and risk of respiratory infections: a quantitative systematic review. *Tropical Medicine and International Health*, 11(3), 258-267. doi:10.1111/j.1365-3156.2006.01568.x

# Ambient Particulate Matter Pollution

## Flowchart

Ambient PM<sub>2.5</sub>

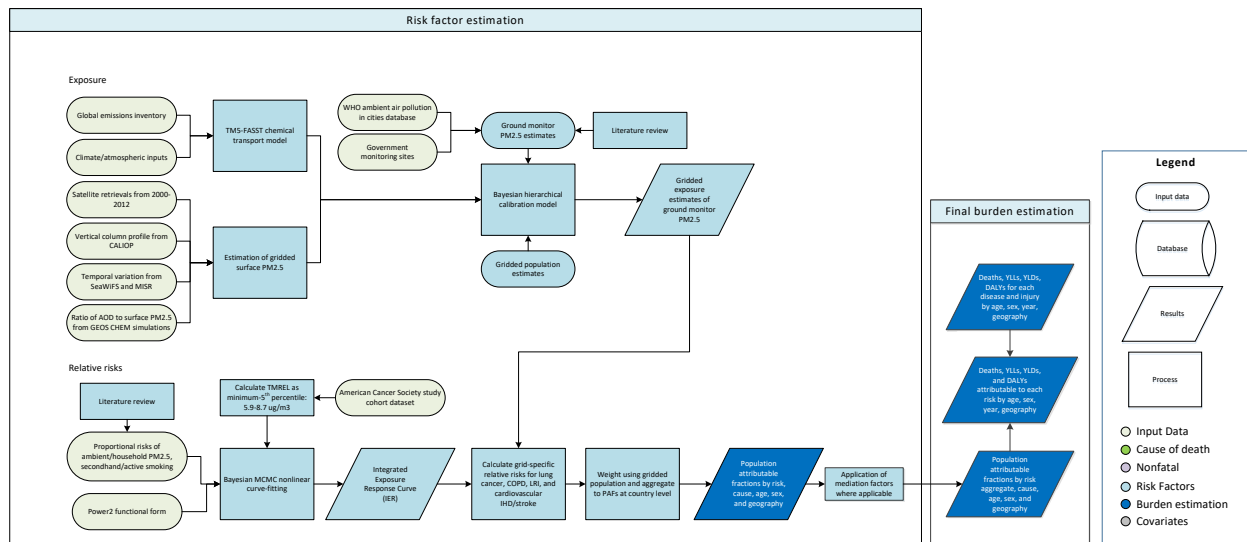

## Input data and modeling strategy

### Exposure

#### Definition

Exposure to ambient air pollution is defined as the population-weighted annual average mass concentration of particles with an aerodynamic diameter less than 2.5 micrometers (PM<sub>2.5</sub>) in a cubic meter of air. This measurement is reported in µg/m<sup>3</sup>.

#### Input Data

The data used to estimate exposure to ambient air pollution is drawn from multiple sources, including satellite observations of aerosols in the atmosphere, ground measurements, chemical transport model simulations, population estimates and land-use data.

The following details the updates in methodology and input data used in GBD2015 and GBD2016 from that used in GBD2013.

#### *PM<sub>2.5</sub> ground measurement database*

Updates of ground measurements used for GBD2015 and GBD2016 include using more recent data than that used in GBD2013 and the addition of data from locations where measurement data have become available. These updates were made in collaboration with the WHO and are included within the May 2016 update of the [WHO Air Pollution in Cities database](#). Monitor-specific measurements (rather than city averages as reported in the WHO database) were used, resulting in measurements of concentrations of PM<sub>10</sub> and PM<sub>2.5</sub> from 6,003 ground monitors from 117 countries. The majority of measurements were recorded in 2014 (as there is a lag in reporting measurements, little data

from 2015 were available). Where data were not available for 2014 (2760 monitors), data was used from 2015 (18 monitors), 2013 (2155), 2012 (564), 2011 (60), 2010 (375), 2009 (49), 2008 (21) and 2006 (1). For locations measuring only PM<sub>10</sub>, PM<sub>2.5</sub> measurements were estimated from PM<sub>10</sub>. This was performed using a locally derived conversion factor (PM<sub>2.5</sub>/PM<sub>10</sub> ratio, for stations where measurements are available for the same year) that was estimated using population-weighted averages of location-specific conversion factors for the country. If country-level conversion factors were not available, the average of country-level conversion factors within a region were used. As in the GBD2013 database, additional information related to the ground measurements was also included where available, including monitor geo coordinates and monitor site type.

#### *Satellite-based estimates*

The updated satellite-based estimates for years 2000–2015 are described in detail in van Donkelaar et al. 2016<sup>1</sup>. These estimates were available at 0.1°×0.1° resolution (~11 x 11 km resolution at the equator) and combine aerosol optical depth retrievals from multiple satellites with the GEOS Chem chemical transport model and land use information.

#### *Population data*

A comprehensive set of population data on a high-resolution grid was obtained from the Gridded Population of the World ([GPW](#)) database. These data are provided on a 0.0417°×0.0417° resolution. Aggregation to each 0.1°×0.1° grid cell comprised of summing the central 3 × 3 population cells. As this resulted in a resolution higher than necessary, it was repeated four times, each offset by one cell in a North, South, East and West direction. The average of the resulting five quantities was used as the estimated population for each grid cell. Population estimates for 2000, 2005, 2010, 2015 and 2020 were available from GPW version 4. Populations for 2015 and 2016 were obtained by interpolation using natural splines with knots placed at 2000, 2005, 2010, 2015 and 2020. This was performed for each grid cell.

#### *Chemical transport model simulations*

Estimates of the sum of particulate sulfate, nitrate, ammonium and organic carbon and the compositional concentrations of mineral dust simulated using the GEOS Chem chemical transport model, and a measure combining elevation and the distance to the nearest urban land surface (as described in van Donkelaar et al. 2016<sup>1</sup>) were available for 2000 to 2015 for each 0.1°×0.1° grid cell. These were not included within the GBD2013 analysis.

### **Modelling Strategy**

Significant advances have been made in the methodology used to estimate exposure to ambient particulate matter pollution since GBD2013. The following is a summary of the modelling approach, known as the Data Integration Model for Air Quality (DIMAQ) used in GBD2015 and 2016; further details can be found in Shaddick *et al.* (2017)<sup>2</sup>

In GBD2010 and GBD2013 exposure estimates were obtained using a single global function to calibrate available ground measurements to a ‘fused’ estimate of PM<sub>2.5</sub>; the mean of satellite-based estimates and those from the TM5 chemical transport model, calculated for each 0.1°×0.1° grid cell. This was recognized to represent a trade-off between accuracy and computationally efficiency when utilising all the available data sources. In particular, the GBD2013 exposure estimates were known to underestimate ground measurements in specific locations (see discussion in Brauer et al., 2016<sup>3</sup>).

This underestimation was largely due to the use of a single, global, calibration function, whereas in reality the relationship between ground measurements and other variables will vary spatially.

In GBD2015 and GBD2016, coefficients in the calibration model were estimated for each country. Where data were insufficient within a country, information can be 'borrowed' from a higher aggregation (region) and if enough information is still not available from an even higher level (super-region). Individual country level estimates were therefore based on a combination of information from the country, its region and super-region. This was implemented within a Bayesian Hierarchical modelling (BHM) framework. BHMs provide an extremely useful and flexible framework in which to model complex relationships and dependencies in data. Uncertainty can also be propagated through the model allowing uncertainty arising from different components, both data sources and models, to be incorporated within estimates of uncertainty associated with the final estimates. The results of the modelling comprise a posterior distribution for each grid cell, rather than just a single point estimate, allowing a variety of summaries to be calculated. The primary outputs here are the median and 95% credible intervals for each grid cell. Based on the availability of ground measurement data, modeling and evaluation was focused on the year 2014.

Due to both the complexity of the models and the size of the data, notably the number of spatial predictions that are required, recently developed techniques that perform 'approximate' Bayesian inference based on integrated nested Laplace approximations (INLA) were used<sup>4</sup>. Computation was performed using the R interface to the INLA computational engine ([R-INLA](#)). Fitting the models and performing predictions for each of the ca. 1.4 million grid cells required the use of a high performance computing cluster (HPC) making use of high memory nodes.

### **Model Evaluation**

Model development and comparison was performed using within- and out-of-sample assessment. In the evaluation, cross validation was performed using 25 combinations of training (80%) and validation (20%) datasets. Validation sets were obtained by taking a stratified random sample, using sampling probabilities based on the cross-tabulation of PM<sub>2.5</sub> categories (0-24.9, 25-49.9, 50-74.9, 75-99.9, 100+ µg/m<sup>3</sup>) and super-regions, resulting in them having the same distribution of PM<sub>2.5</sub> concentrations and super-regions as the overall set of sites. The following metrics were calculated for each training/evaluation set combination: for model fit - R<sup>2</sup> and deviance information criteria (DIC, a measure of model fit for Bayesian models); for predictive accuracy - root mean squared error (RMSE) and population weighted root mean squared error (PwRMSE).

All modelling was performed on the log-scale. The choice of which variables were included in the model was made based on their contribution to model fit and predictive ability. The following is a list variables and model structures that were considered in developing the model.

Continuous explanatory variables:

- (SAT) Estimate of PM<sub>2.5</sub> (in µg m<sup>-3</sup>) for 2014 from satellite remote sensing on the log-scale.
- (CTM) Estimate of PM<sub>2.5</sub> (in µg m<sup>-3</sup>) for 2010 from the TM5 chemical transport model on the log-scale.
- (POP) Estimate of population for 2014 on the log-scale.
- (SNAOC) Estimate of the sum of sulfate, nitrate, ammonium and organic carbon simulated using the GEOS Chem chemical transport model.

- (DST) Estimate of compositional concentrations of mineral dust simulated using the GEOS Chem chemical transport model.
- (EDxDU) The log of the elevation difference between the elevation at the ground measurement location and the mean elevation within the GEOS Chem simulation grid cell multiplied by the inverse distance to the nearest urban land surface.

Discrete explanatory variables:

- (LOC) Binary variable indicating whether exact location of ground measurement is known.
- (TYPE) Binary variable indicating whether exact type of ground monitor is known.
- (CONV) Binary variable indicating whether ground measurement is PM<sub>2.5</sub> or converted from PM<sub>10</sub>.

Random Effects:

- Grid cell random effects on the intercept to allow for multiple ground monitors in a grid cell.
- Country-region-super-region hierarchical random effects for the intercept.
- Country-region-super-region hierarchical random effects for the coefficient associated with SAT .
- Country-region-super-region hierarchical random effects for the coefficient associated with the difference between estimates from CTM and SAT.
- Country-region-super-region hierarchical random effects for the coefficient associated with POP.
- Country level random effects for population uses a neighbourhood structure allowing specific borrowing of information from neighbouring countries.
- Within a region, country level effects of SAT and the difference between SAT AND CTM are assumed to be independent and identically distributed.
- Within a super-region, region level random effects are assumed to be independent and identically distributed.
- Super-region random effects are assumed to be independent and identically distributed.

Interactions:

- Interactions between the binary variables and the effects of SAT and CTM.

## Results

The final model contained the following variables: SAT, POP, SNAOC, DST, EDxDU, LOC, TYPE, and CONV, together with interactions between SAT and each of LOC, TYPE and CONV. The model structure contained grid cell random effects on the intercept to allow for multiple ground monitors in a grid cell, country-region-super-region hierarchical random effects for intercepts and SAT and country level random effects for population using a neighbourhood structure allowing specific borrowing of information from neighbouring countries together with region-super-region hierarchical random effects for POP. Notably, based on the evaluation of candidate models, including estimates from the TM5 chemical transport model (CTM) used in GBD2013 did not improve the predictive ability of the model and was therefore not included.

Compared to the model used in GBD2013, DIMAQ showed improved predictions of ground measurements in all super regions (Table 1). Using this model resulted in an improvement in both within-sample fit; with an increase in R<sup>2</sup> from 0.64 (reported in GBD 2013<sup>1</sup>) to 0.91, and out-of-

sample predictive ability; with a global population-weighted RMSE of 12.1  $\mu\text{g}/\text{m}^3$  compared to 23.1  $\mu\text{g}/\text{m}^3$  when using the GBD 2013 approach.

|                                                        | <b>GBD2013</b> | <b>GBD2015/16</b> |
|--------------------------------------------------------|----------------|-------------------|
| <b>Global</b>                                          | 23.1           | 12.1              |
| <b>High income</b>                                     | 6.4            | 2.7               |
| <b>Central Europe, Eastern Europe and Central Asia</b> | 9.7            | 6.0               |
| <b>Latin America and Caribbean</b>                     | 13.9           | 7.1               |
| <b>Southeast Asia, East Asia and Oceania</b>           | 20.1           | 10.8              |
| <b>North Africa / Middle East</b>                      | 23.6           | 14.3              |
| <b>Sub-Saharan Africa</b>                              | 38.8           | 32.3              |
| <b>South Asia</b>                                      | 44.8           | 22.0              |

Table 1: Summary measures of predictive ability, globally and by super-region. Results are the median values of population weighted root mean squared error ( $\mu\text{g}/\text{m}^3$ ), from 25 validation sets.

### Estimates for other years

Satellite estimates, populations and quantities estimated using the GEOS-Chem model were available for 1990, 1995, 2000, 2005, 2010, 2011, 2012, 2013, 2014 and 2015. Population estimates for 2000, 2005, 2010, 2015 and 2020 were available from GPW version 4. For 1990 and 1995 data were extracted from GPW version 3, as in GBD2013<sup>2</sup>. As with populations for 2015, values for each cell for 2011, 2012, 2013 and 2014 were obtained by interpolation using natural splines with knots placed at 2000, 2005, 2010, 2015 and 2020.

These were used as inputs to DIMAQ, enabling estimates of exposures to be obtained for each of these years respectively. For 2016, estimates of exposures were obtained from predictions from locally-varying regression models<sup>4</sup>. For each cell a model was fit to the values within that cell over time, with a constraint placed on the rate of change between 2015 and 2016 to avoid unrealistic and/or unjustified extrapolation of trends. Measures of uncertainty were obtained by repeating the procedure for the limits of the 95% credible intervals, again on a cell-by-cell basis.

### References

1. van Donkelaar, A.; Martin, R. V; Brauer, M.; Hsu, N. C.; Kahn, R. A.; Levy, R. C.; Lyapustin, A.; Sayer, A. M.; Winker, D. M. Global Estimates of Fine Particulate Matter using a Combined Geophysical-Statistical Method with Information from Satellites, Models, and Monitors. *Environ. Sci. Technol.* 2016, 50 (7), 3762–3772
2. Shaddick, G., Thomas, M.L., Jobling, A., Brauer, M., van Donkelaar, A., Burnett, R., Chang, H., Cohen, A., Van Dingenen, R., Dora, C. and Gummy, S., 2016. Data Integration Model for Air Quality: A Hierarchical Approach to the Global Estimation of Exposures to Ambient Air Pollution. *Journal of Royal Statistical Society Series C (Applied Statistics)*.2017. DOI: 10.1111/rssc.12227
3. Brauer, M.; Freedman, G.; Frostad, J.; van Donkelaar, A.; Martin, R. V; Dentener, F.; Van Dingenen, R.; Estep, K.; Amini, H.; Apte, J. S.; et al. Ambient Air Pollution Exposure Estimation for the Global Burden of Disease 2013. *Environ. Sci. Technol.* 2015, 50 (1), 79–88.
4. Rue, H.; Martino, S.; Chopin, N.; Approximate Bayesian inference for latent Gaussian models by using integrated nested Laplace approximations. *Journal of the royal statistical society: Series b (statistical methodology)*. 2009;71(2):319-92.
5. Cleveland, W.S. and Devlin, S.J., 1988. Locally weighted regression: an approach to regression analysis by local fitting. *Journal of the American statistical association*, 83(403), pp.596-610.



# Household Air Pollution Capstone Appendix

## Flowchart

Household Air Pollution from Solid Fuels

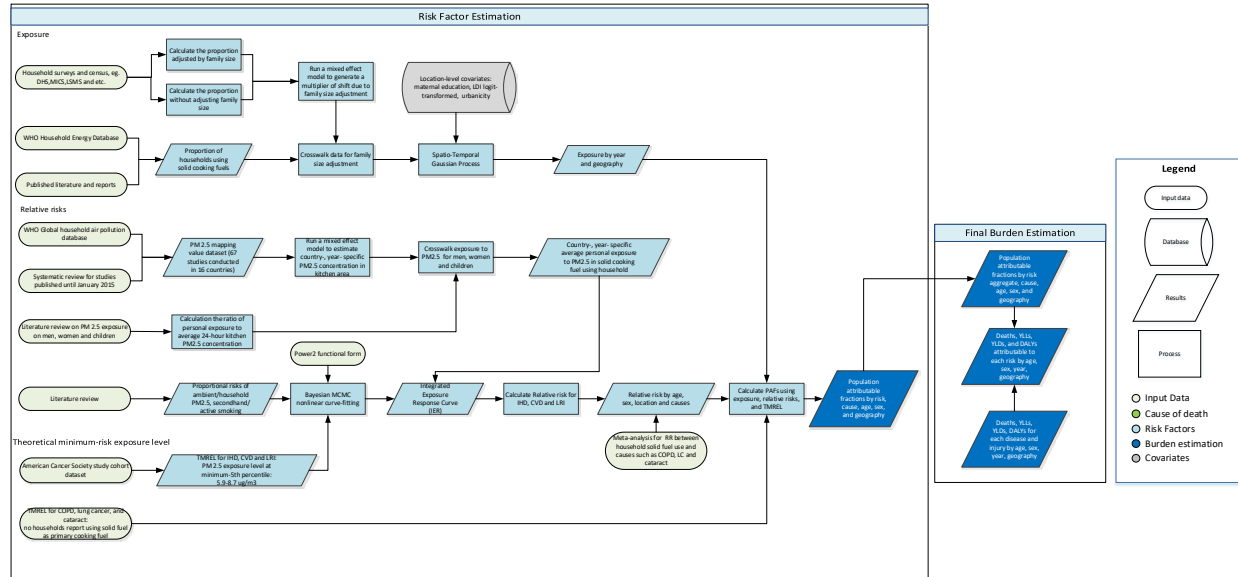

## Input Data & Methodological Summary

### Exposure

#### Case Definition

Exposure to household air pollution from solid fuels (HAP) is defined as the proportion of households using solid cooking fuels. The definition of solid fuel in our analysis includes coal, wood, charcoal, dung, and agricultural residues.

#### Input data

Data were extracted from the standard multi-country survey series such as Demographic and Health Surveys (DHS), Living Standards Measurement Surveys (LSMS), Multiple Indicator Cluster Surveys (MICS), and World Health Surveys (WHS), as well as country-specific survey series such as Kenya Welfare Monitoring Survey and South Africa General Household Survey. To fill the gaps of data in surveys and censuses, we also downloaded and updated HAP estimates from WHO Energy Database and extracted from literature through systematic review. Each nationally or sub-nationally representative data point provided an estimate for the percentage of households using solid cooking fuels. Estimates for the usage of solid fuels for non-cooking purpose were excluded, i.e. primary fuels for lighting. The database, with estimates from 1980 to 2016, contained about 680 studies from 150 countries. As updates to systematic reviews are performed on an ongoing schedule across all GBD causes and risk factors, an update for household air pollution will be performed in the next 1-2 iterations.

#### Modeling strategy

Household air pollution was modeled at household level using a three-step modeling strategy that uses linear regression, spatiotemporal regression and Gaussian Process Regression (GPR). The first step is a mixed-effect linear regression of logit-transformed proportion of households using solid cooking fuels.

The linear model contains maternal education, proportion of population living in urban areas, and lagged-distributed income as covariates and has nested random effect by GBD region, and GBD super region respectively. The full ST-GPR process is specified in Section 2 of this appendix.

No substantial modeling changes were in this round compared to GBD 2015. A variety of combinations of socioeconomic and environmental covariates in different transformation format were tested by running mixed-effect models with exposure data. The final list of covariates included in the exposure model are maternal education, proportion of population living in urban area, and lagged-distributed income since they proved to be the strongest predictors.

### Theoretical minimum-risk exposure level

For outcomes where we extracted relative risks (RR) based on direct epidemiological evidence i.e. chronic obstructive pulmonary disease (COPD), lung cancer, and cataract, TMREL was defined such that no households would report using solid fuel as their primary cooking fuel. For outcomes that utilize evidence based on the Integrated Exposure Response (IER), the TMREL is defined as uniform distribution between 2.4 and 5.9  $\mu\text{g}/\text{m}^3$ . TMREL for household air pollution.

### Relative risks

The disease-outcomes paired with household air pollution have not changed since GBD 2015. These outcomes include lower respiratory infections (LRI), stroke, Ischemic Heart Disease (IHD), COPD, lung cancer and cataract. The relative risks of all outcomes, with the exception of cataracts, were generated by using the integrated exposure-response functions (IER). The relative risks for cataracts were extracted from a meta-analysis paper (1). The IER curves are updated to reflect the newly updated data and utilization of a new method that specified elsewhere.

### PM2.5 mapping value

The relative risk estimates describing the association of HAP with outcomes including ischemic heart disease (IHD), cardiovascular disease (CVD), and lower respiratory infections (LRI) were derived from the IER curves. This is done by first estimating the crosswalk values that map household use of solid fuel to PM2.5 exposure because the IER curve measures exposure using PM2.5. For GBD 2015, this step of the analysis relied on 67 studies conducted in 16 countries to generate the PM2.5 mapping values. In this round, we have extracted PM2.5 data from about 20 additional studies to add to bring the total study sum of the database to almost 90 studies. The addition of more studies has provided more stability in the model and allowed us to use socio-demographic index as a covariate to predict exposure for all location-years. The PM2.5 exposures were then cross-walked to men, women and children by generating the ratio of personal exposure to average 24-hour kitchen PM2.5 concentration based on a study after the literature review in GBD 2013.

### References

1. Smith KR, Bruce N, Balakrishnan K, Adair-Rohani H, Balmes J, Chafe Z, et al. Millions Dead: How Do We Know and What Does It Mean? Methods Used in the Comparative Risk Assessment of Household Air Pollution. *Annu Rev Public Health*. 2014;35(1):185–206.

# Ambient Ozone Pollution

## Flowchart

### Ambient ozone

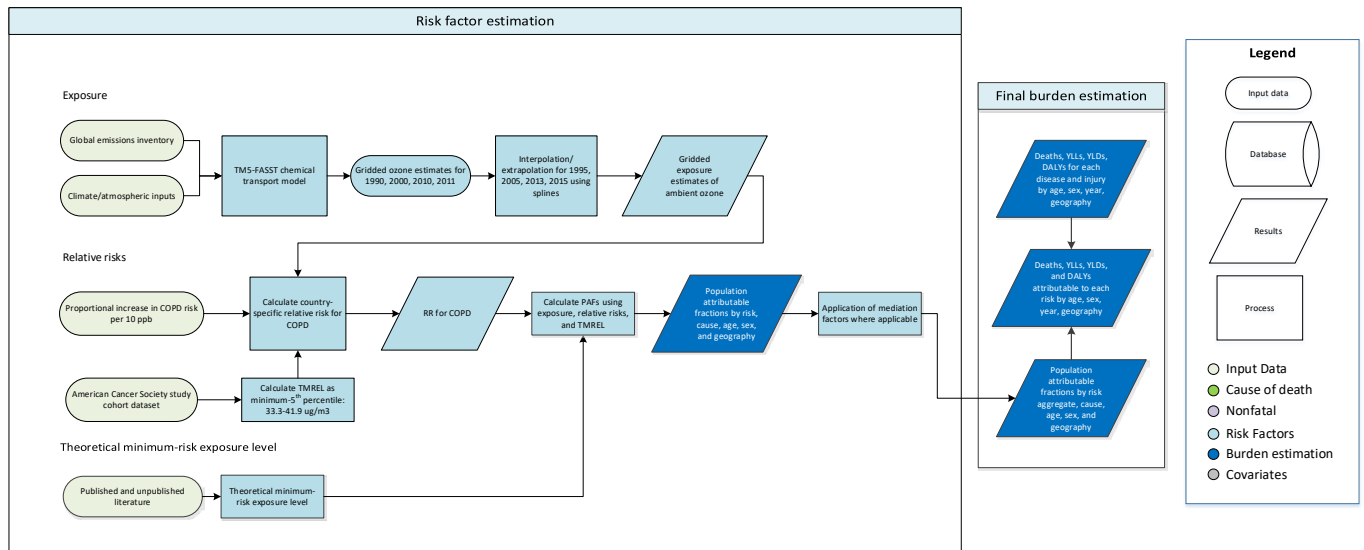

## Input data and Methodological Summary

### Exposure

#### Case Definition

For GBD 2016, exposure to ozone pollution is defined as the number of parts-per-billion (ppb) of ozone ( $O_3$ ).

#### Input data

Data for estimating ozone exposure is derived from the TM5-FASST chemical transport model, which generates a 3-month running average of daily 1 hour maximum ozone values at the  $0.1^\circ \times 0.1^\circ$  for the years 1990, 2000, and 2010.<sup>1</sup>

#### Modeling Strategy

The process for modeling ozone exposure has remained stable since GBD2010 and GBD2013. Natural cubic splines were used to interpolate for the years 1995, 2005, and 2011. Annualized rate of change was used to predict for the years 2013, 2015 and 2016. The uncertainty for exposure at the grid-level was assumed to be  $\pm 6\%$  of the estimated concentration, in accordance with previous work. Uncertainty for ozone was calculated by assuming a  $\pm 6\%$  uncertainty interval around the estimation concentration.

#### Theoretical minimum-risk exposure level

The TMREL of ozone was defined based on the exposure distribution from American Cancer Society CPS-II study, which was the source of the GBD 2016 ozone mortality RR estimate. As with PM2.5, a uniform distribution was drawn around the minimum and 5th percentile values experienced by the cohort. This value was not updated for GBD 2016, and continues to be defined as  $\sim U(33.3, 41.9)$ , in ppb.

No other significant changes were made from GBD 2013 to GBD 2016.

### Relative Risks

The relative risk of ozone exposure for respiratory COPD was extracted from literature and was not updated for GBD 2016. The relative risk is applied linearly per 10 ppb of ozone exposure and is defined as 1.029 (1.010-1048).<sup>2</sup>

### References

1. Brauer M, et al. Ambient Air Pollution Exposure Estimation for the Global Burden of Disease 2013. *Environ Sci Technol* 2016; 50: 79-88.
2. Jerrett M, Burnett RT, Pope CA, et al. Long-term ozone exposure and mortality. *N Engl J Med* 2009; 360: 1085–95.

# Radon Exposure Capstone Appendix

## Flowchart

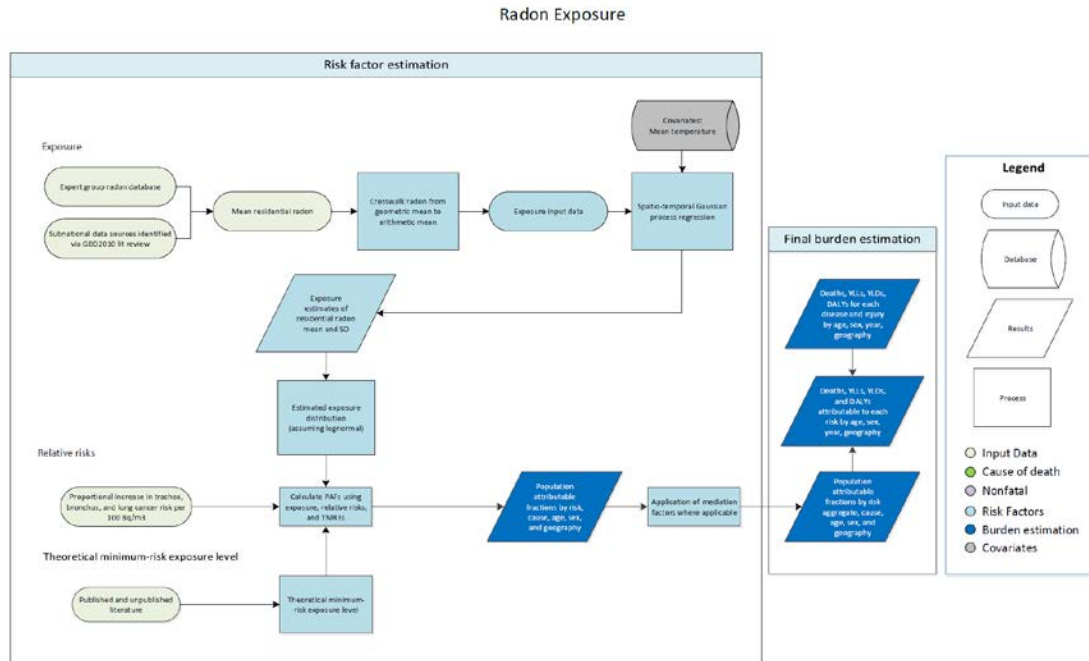

## Input Data & Methodological Summary

### Exposure

#### Case definition

Radon is a radioactive gas that is produced as a byproduct of the decay chain of uranium, occurring naturally within the Earth's crust. Some fraction of this natural radon production escapes into the atmosphere, where it forms at low concentration unless build-up is caused by enclosed spaces like homes, mines, or caves. Radon exposure is expressed as average daily exposure to indoor air radon gas levels measured in Becquerels (disintegrations per second) per cubic meter ( $Bq/m^3$ ).

#### Input Data

Exposure to radon is determined using values curated by an expert group. These values are taken from a variety of sources including literature, government agencies, and monitoring stations. Their methodology is then inspected to determine if they are robust enough to be considered as country-level averages. This dataset was last updated for GBD 2013 by adding new data points across time and space. No new data points were added for GBD 2016.

#### Modeling Strategy

There have been minor changes to the methodology to estimate radon exposure. The modelling process was previously updated by shifting it from a nested random effects model to spatial-temporal GPR. For GBD 2016, the general spatial-temporal GPR modelling methodology was updated as detailed in the appendix specific to this analytical technique, which is common to a variety of risk factors. Radon is

naturally occurring, and is not considered to have much temporal fluctuation<sup>1</sup>. As such, we did not model radon over time, opting instead to assign all data points to a single year, predict across space using our radon database, and use the results for that year for the entire GBD time series. This eliminated any spurious time trends that might arise using the traditional ST-GPR approach. The only study-level covariate considered was whether a data point was reported as geometric or arithmetic mean. The only country-level covariate considered was a location's mean temperature, used as a proxy for the likelihood of adequate building ventilation.

We did not have the microdata necessary to use ensemble modeling to inform our radon exposure distribution, so for GBD 2016 we continued to assume a lognormal distribution. Arithmetic mean exposure estimates obtained from ST-GPR were used to fit the lognormal distribution before applying relative risks.

### Theoretical minimum-risk exposure level

The TMREL was also taken directly from literature values that were not updated for GBD 2016. Given that radon is naturally occurring, zero exposure would be impossible. As such, we continue to use a TMREL of 10 Bq/m<sup>3</sup>, which is equivalent to the outdoor concentration of radon<sup>3</sup>.

### Relative Risks

The relative risk for radon exposure was extracted from literature values – a 2005 meta-analysis of case-control studies showing the association of radon with lung cancer<sup>2</sup>. This value was used in GBD 2010 and has not been changed since.

### References

1. Steck DJ. Annual average indoor radon variations over two decades. *Health Phys.* 2009;96(1):37-47.
2. Darby S, Hill D, Auvinen A, et al. Radon in homes and risk of lung cancer: collaborative analysis of individual data from 13 European case-control studies. *BMJ.* 2005;330(7485):223.
3. Menzler S, Piller G, Gruson M, Rosario AS, Wichmann HE, Kreienbrock L. Population attributable fraction for lung cancer due to residential radon in Switzerland and Germany. *Health Phys.* 2008;95(2):179-89.

# Lead Exposure Capstone Appendix

## Flowchart

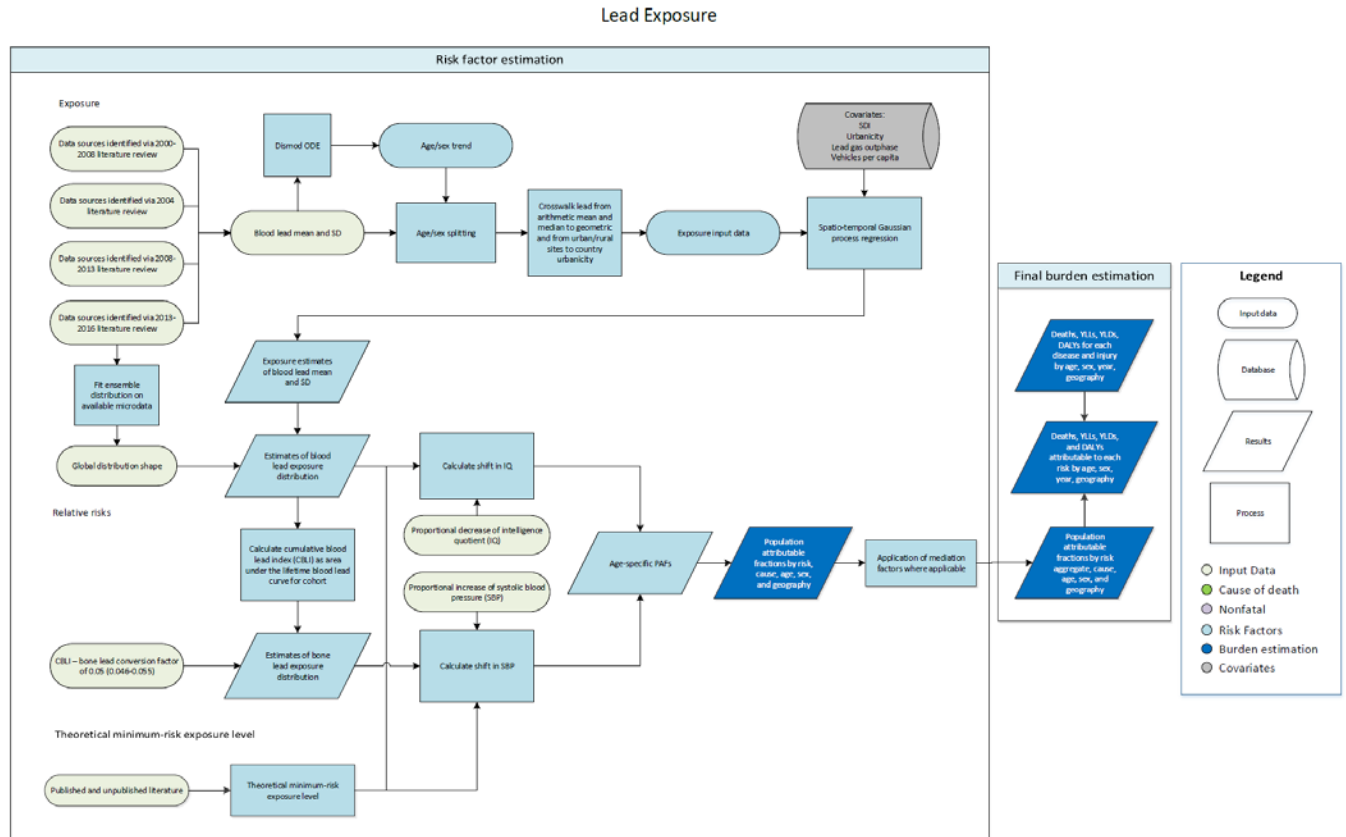

## Input Data & Methodological Summary

### Exposure

#### Case definition

Exposure to lead is defined in two different ways according to the currently known pathways of health loss. Acute lead exposure, relevant to disease burden through IQ loss in children, is measured as the micrograms of lead per deciliter of blood ( $\mu\text{g}/\text{dL}$ ). Long-term lead exposure, relevant to disease burden in adults given the manifestation of health impact through increased systolic blood pressure and hence a decline of cardiovascular health, is measured as the accumulation of lead in the bone as micrograms of lead per gram of bone ( $\mu\text{g}/\text{g}$ ).

#### Input data

The input data for lead exposure is primarily extracted from literature regarding blood lead, in addition to a few blood lead surveys. Blood lead values are derived from studies that take blood samples and analyze them using various techniques to determine the level of lead present. The blood lead database for GBD 2016 was augmented with an updated literature review for the years 2013-2016. In total, this approach yielded 3,151 usable data points from 563 different studies, which spanned the years 1970 to

2016. Nearly 2,000 new data points were added for GBD 2016, including 311 country-years and microdata from 11 blood lead surveys. The database of literature values was modelled for data-sparse countries using spatio-temporal GPR (ST-GPR). These values were used as blood lead exposure. The second pathway of burden is related to bone lead exposure, which was estimated by calculating a cumulative blood lead index for cohorts using estimated blood lead over their lifetime. The cumulative blood lead index is then used to estimate bone lead using a scalar defined in literature<sup>1</sup>.

### *Modeling Strategy*

The methodology to estimate lead exposure last underwent significant change in GBD 2013. Global exposure had been previously modelled using age-integrating Bayesian hierarchical modelling (DisMod-MR). The modelling process was updated for GBD 2013 by shifting to spatial-temporal GPR methodology. This allowed for estimates of all country-age-sex-year groups for single years instead of five year periods. This approach improved the granularity of estimates for bone lead, which requires back-estimation of previous blood lead to calculate a cumulative blood lead index.

For GBD 2016, the spatial-temporal GPR modelling methodology was updated as detailed in the appendix specific to this analytical technique, which is common to a variety of risk factors. In order to predict blood lead in country-years with insufficient data, covariates that have been produced across time and space relevant to this analysis were used. For blood lead exposure, the covariates determined to have predictive ability were the socio-demographic index (SDI), the proportion of a location's population living in urban settings (logit transformed), the combined number of 2 and 4-wheel vehicles per capita, and a covariate indicating whether leaded gasoline had been phased out in a given country-year (smoothed over the first 5 years of phase-out to reflect its gradual implementation). ST-GPR was used to produce estimates of mean and standard deviation of blood lead for all age groups, for both sexes, and for all GBD locations from 1970 to 2016.

In previous iterations of GBD, the distribution of lead exposure was assumed to be log-normal. For GBD 2016, ensemble modeling techniques were used to find an optimal global distribution by fitting a variety of distributions to the available blood lead microdata. This was a common update for all GBD 2016 continuous risk factors. The ST-GPR estimates of mean and standard deviation blood lead were used with the global distribution shape to determine distributions for blood lead exposure.

To calculate blood lead over the lifetime of a given cohort, blood lead was assumed to grow linearly from 2.0 ug/dL in 1920 (see TMREL) to the value for that cohort in 1970. Using the exposure distributions of blood lead over time and space, cohorts were constructed such that lifetime blood lead could be expressed as a curve over each year of life. The area under this curve was the cumulative blood lead index, which could be used to estimate bone lead in a given year with the aforementioned scalar.

### *Theoretical minimum-risk exposure level*

In previous iterations of GBD, the TMREL was taken from literature estimates of pre-industrial blood lead in humans<sup>4</sup>. That value was estimated at 2.0 ug/dL. The decision was made that the TMREL of blood lead could not be 0 given the ambient sources of lead that would be impossible to eliminate<sup>5</sup>.

However, average blood lead exposures in a number of countries have fallen below 2.0 ug/dL in the past few years, suggesting that the TMREL ought to be lowered. Unfortunately, we were not able to find literature with statistically significant estimates for relative risk at such low levels of blood lead exposure. As a result, we have continued to use a TMREL of 2.0 ug/dL for GBD 2016.



## Relative Risks

Because the relative risk of IQ loss from lead exposure is specific to children, in GBD 2015, no burden of lead via IQ loss was estimated in the population aged 15 and above. To better account for the continued burden of past lead exposure on IQ in older age groups, for GBD 2016, cohorts were constructed from the entire population. Estimates of a cohort's lead exposure in early childhood (at 24 months of age) were used to determine past IQ loss, and thus calculate burden via the impact on concurrent IQ in the older population.

Blood lead relative risks were previously taken from a 2005 pooled analysis that was first incorporated in GBD 2010<sup>2</sup>. For GBD 2016, blood lead relative risks have been updated with a 2013 re-analysis of the findings of that 2005 paper, providing slightly adjusted relative risk estimates specific to exposure at 24 months of age<sup>6</sup>. The bone lead relative risks were taken from a 2008 meta-analysis that was updated for GBD 2010<sup>3</sup>.

## References

1. Hu H, Shih R, Rothenberg S, Schwartz BS. The epidemiology of lead toxicity in adults: measuring dose and consideration of other methodologic issues. *Environ Health Perspect.* 2007;115(3):455-62.
2. Lanphear BP, Hornung R, Khoury J, et al. Low-level environmental lead exposure and children's intellectual function: an international pooled analysis. *Environ Health Perspect.* 2005;113(7):894-9.
3. Navas-acien A, Schwartz BS, Rothenberg SJ, Hu H, Silbergeld EK, Guallar E. Bone lead levels and blood pressure endpoints: a meta-analysis. *Epidemiology.* 2008;19(3):496-504.
4. Flegal AR, Smith DR. Lead levels in preindustrial humans. *N Engl J Med.* 1992;326(19):1293-4.
5. Pruss-Astun A, Fewtrell L, Landrigan PJ, Ayuso-Mateos JL. Lead Exposure. In: Ezzati M, Lopez AD, Rodgers A, Murray CJ, eds. *Comparative quantifications of health risks: Global and regional burden of disease attributable to selected major risk factors.* Geneva, World Health Organization, 2004: 1496-542
6. Crump K, Van Landingham C, Bowers T, Cahoy D, Chandalia J. A statistical reevaluation of the data used in the Lanphear et al. () pooled-analysis that related low levels of blood lead to intellectual deficits in children. *Critical Reviews in Toxicology.* 2013;43(9):785-799.

## Occupational Risk Factors

### Input Data and Methodological Summary

#### Exposure

#### Definition

The following definitions were used for occupational risk factor exposures. All exposures were estimated only for ages 15+

|                                                                                                                                                                                               |                                                                                                                                                                             |
|-----------------------------------------------------------------------------------------------------------------------------------------------------------------------------------------------|-----------------------------------------------------------------------------------------------------------------------------------------------------------------------------|
| Occupational Asbestos                                                                                                                                                                         | Cumulative exposure to occupational asbestos using mesothelioma death rate as an analogue.                                                                                  |
| Occupational Asthmagens                                                                                                                                                                       | Proportion of working population exposed to asthmagens based on distribution of the population in nine occupational groups                                                  |
| Occupational Carcinogens (arsenic, acid, benzene, beryllium, cadmium, chromium, diesel, formaldehyde, nickel, polycyclic aromatic hydrocarbons, second-hand smoke, silica, trichloroethylene) | Proportion of working population ever exposed to carcinogens in high or low exposures groups, based on distribution of the population in seventeen economic activity groups |
| Occupational Injuries                                                                                                                                                                         | Proportion of fatal injuries attributed to occupational work in seventeen economic activities, based on fatal injury rates in those economic activities.                    |
| Occupational Ergonomic Factors                                                                                                                                                                | Proportion of working population exposed to lower back pain, based on distribution of the population in nine occupational groups.                                           |
| Occupational Noise                                                                                                                                                                            | Proportion of working population exposed to 85+ decibels of noise, based on distribution in seventeen economic activities.                                                  |
| Occupational Particulates                                                                                                                                                                     | Proportion of working population exposed based on distribution in seventeen economic activities                                                                             |

Estimates of the proportion of population involved in economic activities and occupations were coded into the following categories:

| <b>Economic Activities</b>        | <b>Occupations</b>                            |
|-----------------------------------|-----------------------------------------------|
| Agriculture, hunting, forestry    | Legislators, senior officials, and managers   |
| Fishing                           | Professionals                                 |
| Mining and Quarrying              | Technicians and associate professionals       |
| Manufacturing                     | Clerks                                        |
| Electricity, gas, and water       | Service workers and shop/market sales workers |
| Construction                      | Skilled agricultural and fishery workers      |
| Wholesale and retail trade/repair | Plant and machine operators and assemblers    |
| Hospitality                       | Craft and related workers                     |

|                                                           |                        |
|-----------------------------------------------------------|------------------------|
| Transport, storage, and communication                     | Elementary occupations |
| Financial intermediation                                  |                        |
| Real estate/renting                                       |                        |
| Public administration/defense; compulsory social security |                        |
| Education                                                 |                        |
| Health and social work                                    |                        |
| Other community/social/personal service activities        |                        |
| Private households                                        |                        |
| Extra-territorial organizations/bodies                    |                        |
|                                                           |                        |

**Input data**

Primary inputs were obtained from the ILO [1-4], using raw data on economic activity proportions, occupation proportions, fatal injury rates, and employment to population ratio estimates. A systematic web review was conducted in order to collect the underlying microdata from the ILO’s estimates to aid in re-extraction at lower levels of granularity. Where freely available, survey datasets were downloaded from the survey organizations in question. Other datasets were obtained through submission of requests to the agencies and through the GBD collaborator network. Microdata was tabulated in order to create survey weighted estimates of economic activity and occupation for the GBD geographies and years. Various classification systems were crosswalked to ISIC Rev.3 (for economic activities) and ISCO 1988 (for occupations). Subnational estimates for UK and China were added to the datasets for economic activities and occupations [5-6].

For occupational asbestos, primary inputs were obtained through GBD 2016 cause of death estimates and published studies. [7, 13-14]

Uncertainty for inputs where microdata was not available was generated by fitting a Loess curve to the data and determining the standard deviation of the data from the fitted curve.

**Modeling strategies**

A spatial-temporal Gaussian process regression was used to generate estimates for all year/locations for the primary inputs (see app section 2). Study level covariates included for the prior model were education years per capita, geological covariates (for mining models), proportion of population living with access to coastline (for fishing models), the IHME socio-demographic index (SDI), mean temperature/latitude (for agriculture models), and proportion of population in urban areas. Space-time parameters were chosen by maximizing out-of-sample cross-validation and minimizing RMSE. For economic activity and occupation proportions, estimates from ST-GPR were then re-scaled to sum to 1 across categories by dividing each estimate by the sum of all the estimates.

The following sections describe the modeling approaches for each occupational risk's prevalence exposure.

Occupational carcinogens, occupational noise, occupational particulates

Prevalence of exposure to these risks was determined using the following equation:

$$Prevalence\ of\ Exposure_{c,y,s,a,r,l} = \sum_{EA} Proportion_{EA,c,y} * EAP_{c,y,s,a} * Exposure\ rate_{EA,r,l,d}$$

where:

|                                      |                       |          |
|--------------------------------------|-----------------------|----------|
| EAP = Economically active population | c = country           | r = risk |
| EA = economic activity               | d = duration          | s = sex  |
| a = age                              | l = level of exposure | y = year |

Exposure rate was provided by expert group recommendations and literature [8-11] (see table 1). The CAREX database was used in order to quantify the association between exposure by industry/carcinogen to SDI across all the countries in the database. This effect was used to predict exposure in countries that were not included in CAREX. Duration was considered for occupational carcinogens through application of occupational turnover factors [12] and for occupational noise and particulates by calculating cumulative exposure as the average exposure over the lifetime (past 50 years) for each age/sex cohort.

Occupational ergonomic factors and asthmagens

Prevalence of exposure to these risks was determined using the following equation:

$$Prevalence\ of\ Exposure_{c,y,s,a,r} = \sum_{EA} Proportion_{OCC,c,y} * EAP_{c,y,s,a}$$

where:

|                                      |             |          |
|--------------------------------------|-------------|----------|
| EAP = Economically active population | c = country | r = risk |
| OCC = occupation                     | a = age     | s = sex  |
|                                      |             | y = year |

Occupational injuries

Occupational injury counts were estimated using the following equation:

$$Occupational\ fatal\ injuries_{c,y,a,s} = \sum_{EA} Injury\ rate_{EA,c,y,s} * Population_{c,y,a,s} * EAP_{c,y,s,a} * Proportion_{EA,c,y}$$

where:

|                                      |             |          |
|--------------------------------------|-------------|----------|
| EAP = Economically active population | c = country | y = year |
| EA = economic activity               | a = age     | s = sex  |

## Occupational asbestos

Prevalence of exposure to asbestos was estimated using the asbestos impact ratio (AIR), which is equivalent to the excess deaths due to mesothelioma observed in a population divided by excess deaths due to mesothelioma in a population heavily exposed to asbestos. Formally, this is defined using the following equation:

$$AIR = \frac{Mort_{c,y,s} - N_{c,y,s}}{Mort_{c,y,s}^* - N_{c,y,s}}$$

where:

|                                                                                     |             |
|-------------------------------------------------------------------------------------|-------------|
| Mort = Mortality rate due to mesothelioma                                           | c = country |
| Mort* = Mortality rate due to mesothelioma in population highly exposed to asbestos | y = year    |
| N = Mortality rate due to mesothelioma in population not exposed to asbestos        | s = sex     |

Mortality rate due to mesothelioma was estimated from GBD 2015 causes of death [7]. Mortality rate due to mesothelioma in population not exposed to asbestos was calculated using the model in Lin et al. [13], while the mortality rate due to high exposure to asbestos was estimated in Goodman et al. [14]. Asbestos exposure prevalence created using the AIR was used to estimate PAFs for all associated causes except for mesothelioma. Custom PAFs were calculated for mesothelioma by using the ratio of excess mortality compared to the unexposed population (Mort – N) to the mortality rate in the population in question (Mort). This calculation assumes that all mesothelioma is a product of occupational asbestos exposure and could potentially over-estimate burden due to occupational asbestos exposure in populations with high non-occupational asbestos exposure.

### **Theoretical minimum-risk exposure level**

For all occupational risks, with the exception of occupational asbestos, the theoretical minimum-risk exposure level was assumed to be no exposure to that risk.

### **Relative risk**

Relative risks were obtained for all occupational risks by conducting a systematic review of published meta-analysis. The estimates used, as well as the associated studies, are reported by category group in appendix table 1.

### **PAF**

For all occupational risks, with the exception of injuries (outlined below) and mesothelioma (outlined above), PAFs were calculated using the prevalences estimated above, using the PAF formula in appendix section 2.

## Occupational injuries PAF

The PAF for occupational injuries was calculated using the following formula:

$$PAF_{c,y,a,s} = \frac{\text{Occupational fatal injuries}_{c,y,a,s} - TMREL}{\text{Fatal injuries}_{c,y,a,s}}$$

where:

c = country  
y = year

a = age  
s = sex

Fatal injuries total was obtained from GBD 2016 causes of death [7].

### **Citations**

- [1] International Labour Organization (ILO). International Labour Organization Database (ILOSTAT) - Employment by Sex and Economic Activity. International Labour Organization (ILO).
- [2] International Labour Organization (ILO). International Labour Organization Database (ILOSTAT) - Employment by Sex and Occupation. International Labour Organization (ILO).
- [3] International Labour Organization (ILO). International Labour Organization Database (ILOSTAT) - Fatal Injuries by Sex and Economic Activity. International Labour Organization (ILO).
- [4] International Labour Organization (ILO). International Labour Organization LABORSTA Economically Active Population, Estimates and Projections, October 2011. International Labour Organization (ILO), 2011.
- [5] Office for National Statistics (United Kingdom). Nomis Official Labor Market Statistics - Annual Population Survey. Newport, United Kingdom: Office for National Statistics (United Kingdom).
- [6] National Bureau of Statistics of China. China 1% National Population Sample Survey 1995. Ann Arbor, United States: China Data Center, University of Michigan.
- [7] GBD 2015 Mortality and Causes of Death Collaborators. Global, regional, and national life expectancy, all-cause and cause-specific mortality for 249 causes of death, 1980–2015: a systematic analysis for the Global Burden of Disease Study 2015. *Lancet Rev.*
- [8] Wilson DH, Walsh PG, Sanchez L, *et al.* The epidemiology of hearing impairment in an Australian adult population. *Int J Epidemiol* 1999; 28: 247–52
- [9] Kauppinen T, Toikkanen J, Pederson D, Young R, Kogevinas M, Ahrens W, *et al.* Occupational Exposure to Carcinogens in the European Union in 1990-93. Helsinki, Finland: Finnish Institute of Occupational Health; 1998.
- [10] Kauppinen T, Toikkanen J, Pedersen D, Young R, Ahrens W, Boffetta P, *et al.* Occupational exposure to carcinogens in the European Union. *Occup Environ Med* 2000; 57(1): 10–18.

- [11] Driscoll T, et al. The global burden of non-malignant respiratory disease due to occupational airborne exposures. *American Journal of Industrial Medicine* 2005; 48(6): 432-445.
- [12] Nelson, D. I., Concha-Barrientos, M., Driscoll, T., Steenland, K., Fingerhut, M., Punnett, L. & Corvalan, C. (2005). The global burden of selected occupational diseases and injury risks: Methodology and summary. *American journal of industrial medicine*, 48(6), 400-418
- [13] Lin R-T, Takahashi K, Karjalainen A, et al. Ecological association between asbestos-related diseases and historical asbestos consumption: an international analysis. *Lancet* 2007; **369**: 844–9.
- [14] Goodman M, Morgan RW, Ray R, Malloy CD, Zhao K. Cancer in asbestos-exposed occupational cohorts: a meta-analysis. *Cancer Causes Control* 1999; **10**: 453–65.

# Suboptimal Breastfeeding Capstone Appendix

## Flowchart

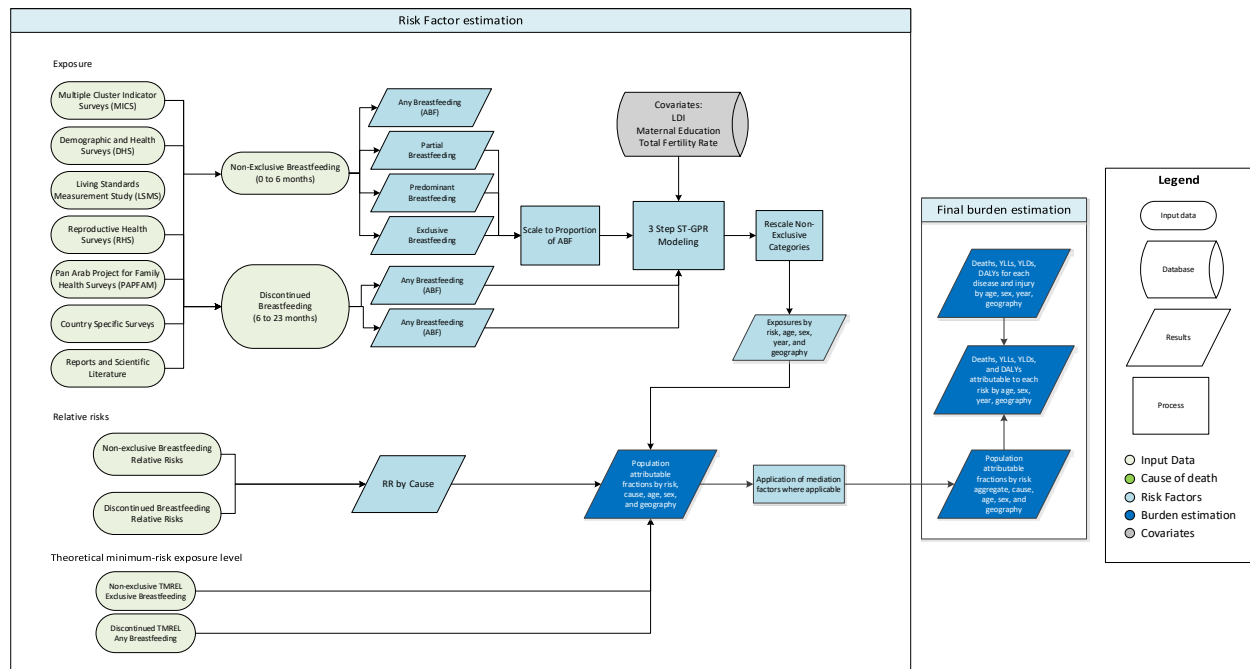

## Input Data & Methodological Summary

### Exposure

#### Definition

Exposure to suboptimal breastfeeding is composed of 2 distinct categories: nonexclusive breastfeeding and discontinued breastfeeding. Non-exclusive breastfeeding is defined as the proportion of children under 6 months who are not exclusively breastfed. Those not exclusively breastfed are then parsed into 3 categories – predominate, partial, and no breastfeeding. Discontinued breastfeeding is defined as the proportion of children between 6 to 23 months who receive no breast milk.

#### Input data

The data used in this analysis consists mostly of processed micro data from surveys and tabulated data from scientific literature and reports. The data was primarily sourced from the micro data of surveys. The data updates were focused on the extraction of the larger surveys at the subnational level, especially for those subnational locations added into GBD 2016. Tabulated data was only used when micro data was not available.

#### Modeling

A complete time series from 1980 to 2016 for the prevalence of breastfeeding patterns for children 0 to 6 months and 6 to 23 months were generated. This was accomplished by carrying the processed micro and tabulated data through a three-step modeling process. First, a robust linear regression incorporated the covariates of log-transformed lag-distributed income, total fertility rate, and the mean years of education of women of reproductive age. This was followed by a spatial-temporal regression that used the residuals of the predictions from the linear regression to perform a locally-weighted regression that



provided a greater weighting factor to those nearer in space and time. The predicted residuals from this step are added to those created in the linear regression. The final of the three steps was the Gaussian Process Regression. This step incorporated the variance of the input data as well as that of the model predictions. It used predictions from the spatial-temporal regression as the mean function and generated draws from a multinomial distribution, based on the data uncertainty in the prior, to generate the final prevalence estimates and their confidence intervals. One major change to our modeling process for this round was we now estimate exposure to suboptimal breastfeeding for high-income countries, whereas, exposure was assumed to be zero in GBD 2015.

### Theoretical minimum-risk exposure level

For non-exclusive breastfeeding, those children that received no source of nourishment other than breastmilk were considered to be at the lowest risk of any of the disease outcomes. For discontinued breastfeeding, we assumed that children aged 6 to 23 months who received any breastmilk as a source of nourishment to be at the lowest risk of disease outcome.

### Relative risks

Relative risks used for suboptimal breastfeeding were generated based on published review by the World Health Organization (Horta et al., 2013). New relative risks, for both non-exclusive and discontinued breastfeeding, were generated from the studies compiled by this review. Non-exclusive breastfeeding exposure was paired with diarrhea and LRI as disease outcomes. Discontinued breastfeeding was paired with diarrhea only. No new outcomes were added in GBD 2016.

We have also applied a novel adjustment to the existing relative risks in order to make them representative to their larger GBD age groups (post neo-natal in the case of nonexclusive breastfeeding and 1 to 4 years in the case of discontinued breastfeeding).

### References

1. Horta, B., Voctora, C. (2013) Short-term effects of breastfeeding: a systematic review on the benefits of breastfeeding on diarrhoea and pneumonia mortality. The World Health Organization.

# Child Growth Failure Capstone Appendix

## Flowchart

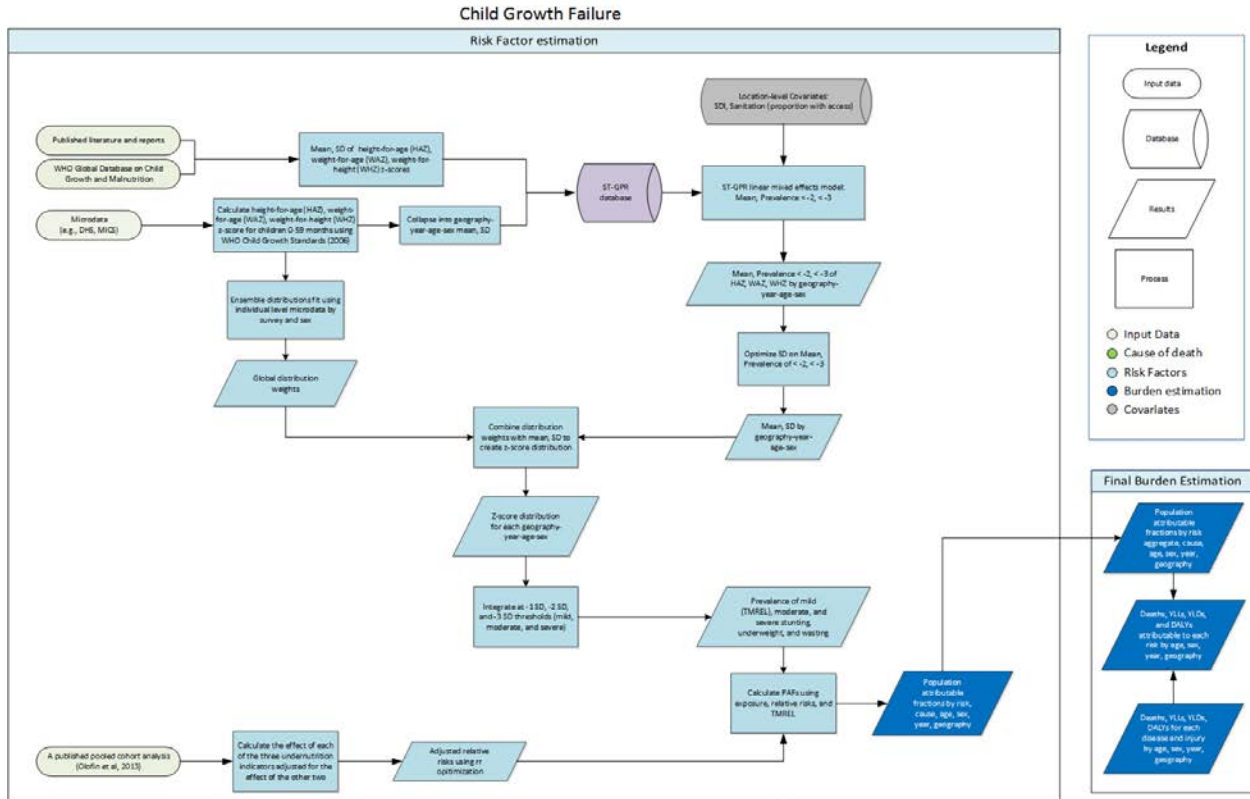

## Input Data & Methodological Summary

### Exposure

#### Case Definition

Child growth failure is estimated using three indicators, stunting, wasting, and underweight, all of which are based on categorical definitions using the WHO 2006 growth standards for children 0-59 months.<sup>1</sup> Definitions are based on Z scores from the growth standards, which were derived from an international reference population. Mild, moderate, and severe categorical prevalences were estimated for each of the three indicators.

#### Input data

There are two main inputs for the GBD 2016 child growth failure models: microdata from population surveys and tabulated data from reports, literature, and the WHO Global Database on Child Growth and

<sup>1</sup> [https://www.unicef.org/infobycountry/stats\\_popup2.html](https://www.unicef.org/infobycountry/stats_popup2.html)

Malnutrition.<sup>2</sup> Population surveys include a variety of multi-country and country-specific survey series such as Multiple Indicator Cluster Surveys (MICS), Demographic and Health Surveys (DHS), Living Standards Measurement Surveys (LSMS), and the China Health and Nutrition Survey (CHNS), as well as other one time country specific surveys such as the Indonesia Family Life Survey and the Brazil National Demographic and Health Survey of Children and Women. These microdata contain information about each individual child's age (from which age in weeks and age in months are calculated), as well as height and/or weight. From that information, a height-for-age z-score (HAZ), weight-for-age z-score (WAZ), and weight-for-height z-score (WHZ) are calculated using the WHO 2006 Child Growth Standards and the LMS method.<sup>3,4</sup>

The second source of data was tabulated data from survey reports, published literature, and the WHO Global Database on Child Growth and Malnutrition that contained the mean z-score and SD for stunting, wasting, and underweight (HAZ, WAZ, WHZ). Any data that was reported using the NCHS 1978 growth standards was given 10% weight in the regression; in future iterations of GBD, we will crosswalk this data to the WHO 2006 Child Growth Standards. All data used in this analysis is catalogued in the Global Health Data Exchange (<http://ghdx.healthdata.org>). A representative dataset coverage map for moderate stunting is shown below.

**Figure 1: Number of data points in moderate stunting (<-2 HAZ) in males, 1990 to 2016**

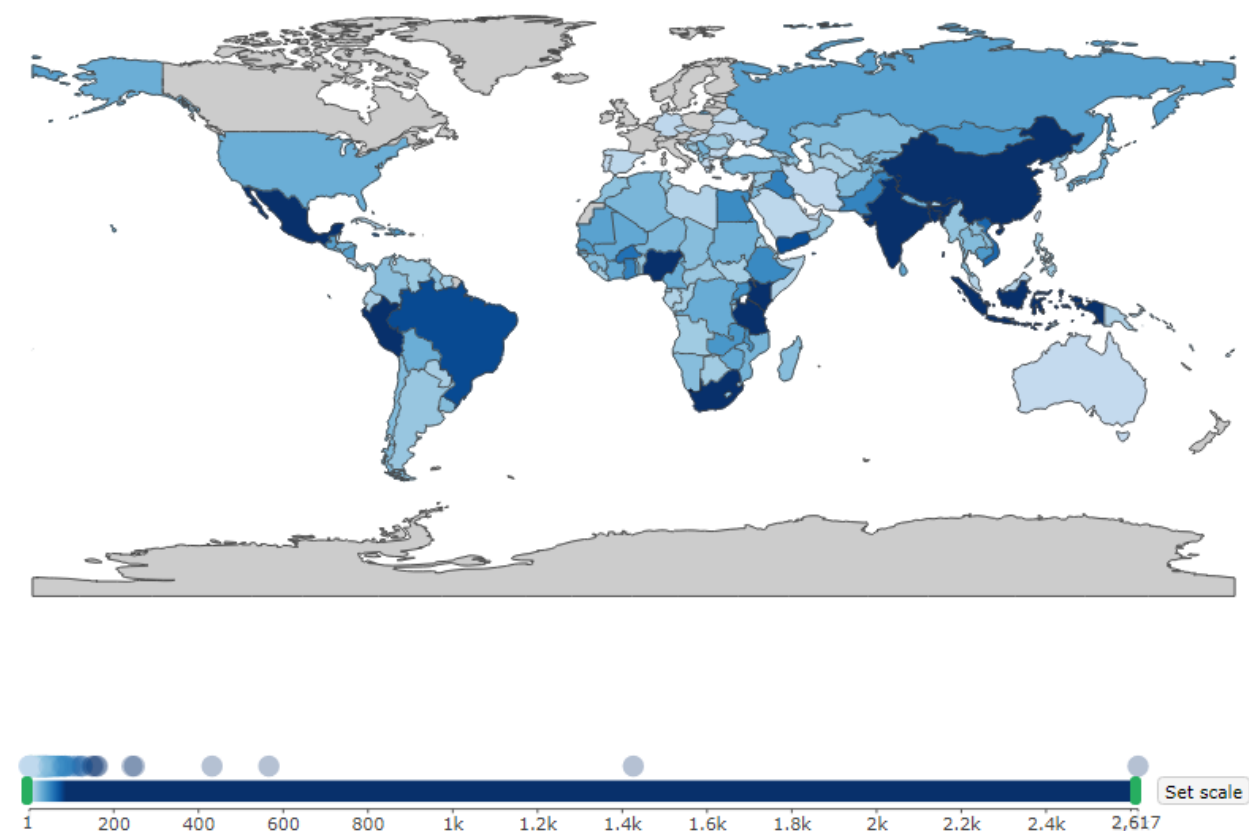

<sup>2</sup> <http://www.who.int/nutgrowthdb/en/>

<sup>3</sup> <http://www.who.int/childgrowth/standards/en/>

<sup>4</sup> <http://webnt.calhoun.edu/distance/internet/Business/eco231/downloads/9781441917874-c1.pdf>

## Modeling strategy

### Exposure Estimation

The following three-step modeling process was applied to each of stunting, wasting, and underweight.

First, all microdata was fit using an ensemble modeling process, a modeling framework developed for GBD 2016 that is described elsewhere in this appendix. A series of 12 individual distributions (normal, log normal, log logistic, exponential, gamma, mirror gamma, inverse gamma, gumbel, mirror gumbel, Weibull, inverse Weibull, and beta) were fit to the entire set of microdata (approximately 2.5 million individual z-scores) at the individual survey level. A weighting algorithm combined each distribution to find the optimal combination of these distributions for each survey, minimizing the absolute prediction error across the entire distribution. Ensemble weights for each survey were then averaged across all surveys to produce a single set of global weights of the ensemble distributions. Weights were different for each sex, but invariant across geography, time, and age group. All component distributions that were used to derive weights were parameterized using “method of moments,” meaning that each corresponding probability density function (PDF) could be described as a function of the mean and variance of the quantity of interest.

Second, models were developed for mean Z scores and prevalence of moderate and severe growth failure. Individual level microdata were collapsed to calculate three metrics: mean z-score, moderate prevalence, and severe prevalence. These data were combined with that derived from literature, GHDx review, and the WHO Global Database on Child Growth and Malnutrition. For those sources where moderate prevalence was reported without a corresponding mean, we calculated a predicted mean using an ordinary-least square (OLS) regression from those sources where both metrics were present. Each of the three metrics was then modeled using spatiotemporal Gaussian process regression (ST-GPR), a common modeling framework used across GBD 2016 analyses, generating estimates for each age-group, sex, year, and location.

Third, we combined estimates of mean, prevalence (moderate and severe) with ensemble weights in an optimization framework in order to derive the variance that would best correspond to the predicted mean and prevalence. This variance was then paired with the mean and, using the method of moments equation for each of the component distributions of the ensemble, PDF of the distribution of Z-scores were calculated for each location, year, age-group, and sex. PDFs were integrated to determine the prevalence between -1 and -2 Z scores (mild), between -2 and -3 Z scores (moderate), and below -3 Z scores (severe). These were categorical exposures used for subsequent attributable risk analysis.

### Differences from GBD 2015

There are several important differences from the GBD 2015 analysis. First, our systematic data searching efforts led to an approximately 30% increase in the number of data sources, including a significant increase in data sources for Oceania, Latin America, and South Asia. Most notable was the increase in data for India through our collaboration with the India Council for Medical Research (ICMR) and Public Health Foundation of India (PHFI). Second, while GBD 2015 also used ST-GPR to model growth failure, models were completed for a single 0-5 age group, followed by application of a pooled uniform age-sex split which resulted in the implicit assumption that the age pattern of growth failure is invariant over time and geography. GBD 2016 estimates, owing to smaller sample sizes in younger age groups, do have wider uncertainty in those age groups. Third, GBD 2015, like all analyses of growth failure before it, assumed

that high-income countries had zero prevalence of child growth failure. We have suspended this assumption for GBD 2016 as it is not accurate and instead made explicit estimates of growth failure in all locations. Fourth, GBD 2015 did not use an ensemble approach or estimate the entire distribution of Z scores. Fifth, we have changed the name of this risk factor category changed from childhood undernutrition to child growth failure to more explicitly identify the specific aspects of childhood undernutrition that are covered by the three component indicators.

### Theoretical minimum-risk exposure level

Theoretical minimum risk exposure level (TMREL) for underweight, stunting, and wasting was assigned to be greater than or equal to -1 SD of the WHO 2006 standard weight-for-age, height-for-age, and weight-for-height curves respectively. This was unchanged from GBD 2015.

### Relative risks

Relative risks (RRs) were derived from a pooled cohort analysis (source and risk-outcome pairs below), which remained the same as GBD 2013 & GBD 2015.<sup>5</sup> The final list of outcomes paired with child growth failure risks included lower respiratory infections (LRI), diarrhea, measles, and protein energy malnutrition (PEM). The RRs were adjusted using an optimization algorithm developed at IHME for GBD 2013 that takes into account covariance between the three child growth failure indicators.

Of historical note, URI and otitis media were included as outcomes in the GBD 2013 risk analysis, based on the “analogy” causal criterion, assuming there is similar pathway as LRI outcome. However, closer review for GBD 2015 did not find sufficient evidence to support their inclusion and they were excluded, a decision that was carried forward into GBD 2016. We also attributed 100% of PEM to childhood wasting and underweight but not stunting. To build on the existing literature base for GBD on risk-outcome pairs, a literature search was conducted for GBD 2016 searching for case-control studies published after January 1st, 1985; this search did not return any sources that were appropriate for this work.

| Risk factor       | Outcome                      |
|-------------------|------------------------------|
| Child underweight | Diarrhoeal diseases          |
| Child underweight | Lower respiratory infections |
| Child underweight | Measles                      |
| Child stunting    | Diarrhoeal diseases          |
| Child stunting    | Lower respiratory infections |
| Child stunting    | Measles                      |
| Child wasting     | Diarrhoeal diseases          |
| Child wasting     | Lower respiratory infections |
| Child wasting     | Measles                      |

<sup>5</sup> Olofin I, McDonald CM, Ezzati M, et al. Associations of suboptimal growth with all-cause and cause-specific mortality in children under five years: a pooled analysis of ten prospective studies. PLoS ONE 2013; 8: e64636

# Low Birth Weight and Short Gestation

## Flowchart

Low birth weight and Short gestation Risk Factors

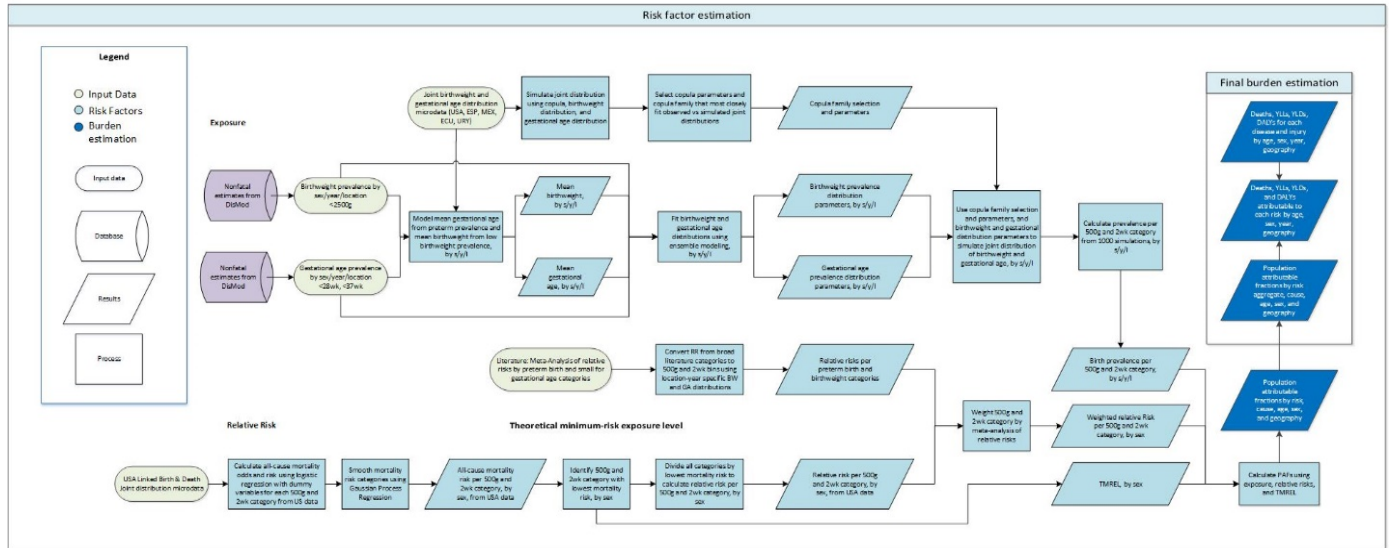

## Input Data and Methodological Summary

The “Low Birth Weight and Short Gestation” risk factor and its child risks “Low Birth Weight for Gestation” and “Short Gestation for Birth Weight” are new risk factors for GBD 2016.

Although Low Birth Weight for Gestation and Short Gestation for Birth Weight are separate risk factors, the exposures and relative risks for both are estimated jointly through the Low Birth Weight and Short Gestation parent risk factor. Joint estimation of risk factors is a new approach in GBD 2016 and is thought to yield more accurate estimates of the PAF attributable to low birth weight and short gestation.

## Case Definition

The term “low birth weight” is commonly used to refer to birth weight less than 2500 grams. Likewise, newborns are typically classified into gestational age categories of “extremely preterm” (<28 weeks of gestation), “very preterm” (28-<32 weeks of gestation), and “moderate to late preterm” (32-<37 weeks of gestation).

However, the use of “low birth weight” in these risk factors refers to birth weight below the Theoretical Minimum Risk Exposure Level (TMREL) for birth weight ([4000, 4500) grams). “Short gestation” refers to gestational age below the gestational age TMREL ([40, 42) weeks). Exposures and relative risks for the GBD Low birth weight and short gestation risk factors are divided into joint 500-gram birth weight and 2-week gestational age combinations.

Under this framework, the eight 500-gram birth weight categories less than the birth weight category associated with the Theoretical Minimum Risk Exposure Level ([4000-4500) grams – see below for

TMREL methods) refer to “low birth weight”. “Short gestation” refers to the ten 2-wk gestational age categories less than the gestational age associated with the Theoretical Minimum Risk Exposure level ([40-42) weeks – see below for TMREL methods). Each combination of 500-grams and 2-wks is associated with a relative risk for mortality by neonatal period (early and late neonatal) and by the causes listed in Table 1, and relative to the joint TMREL [4000-4500) grams and [40-42) weeks.

**Table 1: Cause list for low birth weight and short gestation**

| Cause ID | Cause name                                               |
|----------|----------------------------------------------------------|
| 302      | Diarrheal diseases                                       |
| 322      | Lower respiratory infections                             |
| 328      | Upper respiratory infections                             |
| 329      | Otitis media                                             |
| 333      | Pneumococcal meningitis                                  |
| 334      | H influenzae type B meningitis                           |
| 335      | Meningococcal meningitis                                 |
| 336      | Other meningitis                                         |
| 337      | Encephalitis                                             |
| 381      | Neonatal preterm birth complications                     |
| 382      | Neonatal encephalopathy due to birth asphyxia and trauma |
| 383      | Neonatal sepsis and other neonatal infections            |
| 384      | Hemolytic disease and other neonatal jaundice            |
| 385      | Other neonatal disorders                                 |
| 686      | Sudden infant death syndrome                             |

## Exposure

### Input data

To model the joint distribution of exposure of low birth weight and short gestation for each location, year, and sex estimated in GBD 2016, three types of information are used:

- Distribution of gestational age for each location, year, and sex
- Distribution of birth weight for each location, year, and sex
- Copula family and parameters, specifying correlation between gestational age and birth weight distributions

### Modeling strategy

#### Distributions of Birth weight & Gestational Age

To model the joint distribution of birth weight and gestational age for every sex/location/year, ensemble model methods standard to GBD risk factors (described elsewhere in the methods appendix), are first used to create separate distributions of birth weight and gestational age for every sex/location/year.

Microdata is the most ideal data source for modeling distributions; however, microdata is not widely available for birth weight and is even more scarce for gestational age. Much more readily available, and from a wider range of locations and years, is categorical prevalence data for low birth weight (<2500g), extremely preterm (<28 weeks of gestation), very preterm (28-32 weeks of gestation), moderate to late preterm (32-37 weeks of gestation), and preterm birth (<37 weeks of gestation).

Since GBD 2010, this categorical data has been used model birth prevalence of preterm birth by gestational age (<28 wks, 28-<32 wks, and 32-<37 wks) and low birth weight (<2500g) for every location, sex, and year estimated in GBD.

We use the ensemble model methods, with the categorical estimates of preterm birth and low birth weight, which are available for every sex/location/year, as inputs, to estimate gestational age and birth weight distributions for every sex/location/year. Mean birth weight and mean gestational age for every sex/location/year are also estimated from the categorical prevalence estimates, and also serve as inputs into the ensemble modeling methods.

#### Copula Optimization

Distributions of gestational age and birth weight are not independent; initial exploration of available joint microdata of births with birth weight and gestational age from five countries (the United States, Mexico, Spain, Uruguay, Ecuador) showed that the Spearman correlation for each country of data, pooling across all years of data available, ranged from 0.340-0.489 (Table 2). Because of the correlation between birth weight and gestational age, in order to model the joint distribution of gestational age and birth weight from the separate distributions, information is first needed about the correlation between the two distributions.

**Table 2: Spearman Correlation and sample size of countries' microdata with joint birth weight and gestational age, combined sex**

| Country (years of data) | Spearman Correlation between birth weight & gestational age | Total births (all years) |
|-------------------------|-------------------------------------------------------------|--------------------------|
| USA (1990-2014)         | 0.400                                                       | 81,929,879               |
| URY (1996-2014)         | 0.489                                                       | 698,622                  |
| ESP (1980-2014)         | 0.360                                                       | 10,991,153               |
| MEX (2008-2012)         | 0.354                                                       | 10,253,571               |
| ECU (2003-2015)         | 0.340                                                       | 2,473,039                |

Copula modeling is used to model joint distributions between the birth weight and gestational age marginal distributions. The Copula and VineCopula packages in R were used to select the optimal copula family and copula parameters to model the joint distribution, using joint microdata from the country-years in Table 2. The copula family selected from the microdata was "Survival BB8".

Using the Copula and VineCopula packages in R, the joint distribution could then be estimated from the



available information: uniform copula family and parameters for all sexes/location/years and separate distributions of gestational age and birth weight provided by the ensemble models for every sex/location/year. Each joint distribution was divided into 500g by 2wk bins to match the categorical bins of the relative risk surface.

## Relative Risks & Theoretical minimum-risk exposure level

### Input data

Data Source: National Center for Health Statistics, Linked Birth/Death Cohort Data (1996-2010)

In the US Linked Birth/Death Cohort datasets, live births are reported with gestational age, birth weight, and an indicator of death at 7 days and 28 days. For this analysis, gestational age was grouped into 2-week categories, and birth weight was grouped into 500-gram categories.

### Modeling strategy

Using pooled US Linked Birth/Death Cohort Data from 1996-2010, the risk of all-cause mortality at the early neonatal period and late neonatal period at joint birth weight and gestational age combinations was calculated. Figures 1-4 display male and female relative risk surfaces in log space of all-cause mortality in the early neonatal period (0-6 days) and late neonatal period (7-27 days) at combinations of birth weight and gestational age. The relative risk of each joint gestational age and birth weight category are relative to the risk of mortality in the early neonatal period and late neonatal period at the joint gestational age and birth weight category with the lowest mortality risk, which was identified as [40-42) weeks and [4000-4500) grams.

To calculate relative risk at each 500g and 2wk combination, logistic regression was first used to calculate mortality odds for each joint 2-week gestational age and 500-gram birth weight category. A pooled country analysis<sup>1</sup> of mortality risk in the early neonatal period and late neonatal period by SGA category in developing countries in Asia, the Americas, and Sub-Saharan Africa was also used to weight the risk surfaces developed from the US Linked Birth/Death Cohort Data. The combined mortality odds for each gestational age and birth weight category were then smoothed with Gaussian Process Regression, with the independent distributions of mortality odds by birth weight and mortality odds by gestational age serving as priors in the regression.

The smoothed mortality odds were converted to mortality risk. Relative risks were calculated by dividing each the mortality risk in each joint gestational age and birth weight category by the risk at the TMREL. The relative risk surfaces, which were created using all-cause mortality, were then attributed to specific causes (Table 1) identified as closely linked to low birth weight and short gestation.

### Limitations

---

<sup>1</sup> Katz et al. Mortality risk in preterm and small-for-gestational-age infants in low-income and middle-income countries: a pooled country analysis. 2013. Volume 382, Issue 9890. *The Lancet*.

A limitation of this approach is that the only linked birth and death data set available to create the relative risk surface is from the United States. Ideally, data from other locations would inform the relative risk surface. Additionally, relative risks were calculated from all-cause mortality, and then applied to specific causes. Cause-specific relative risks would be more ideal.

## Figures

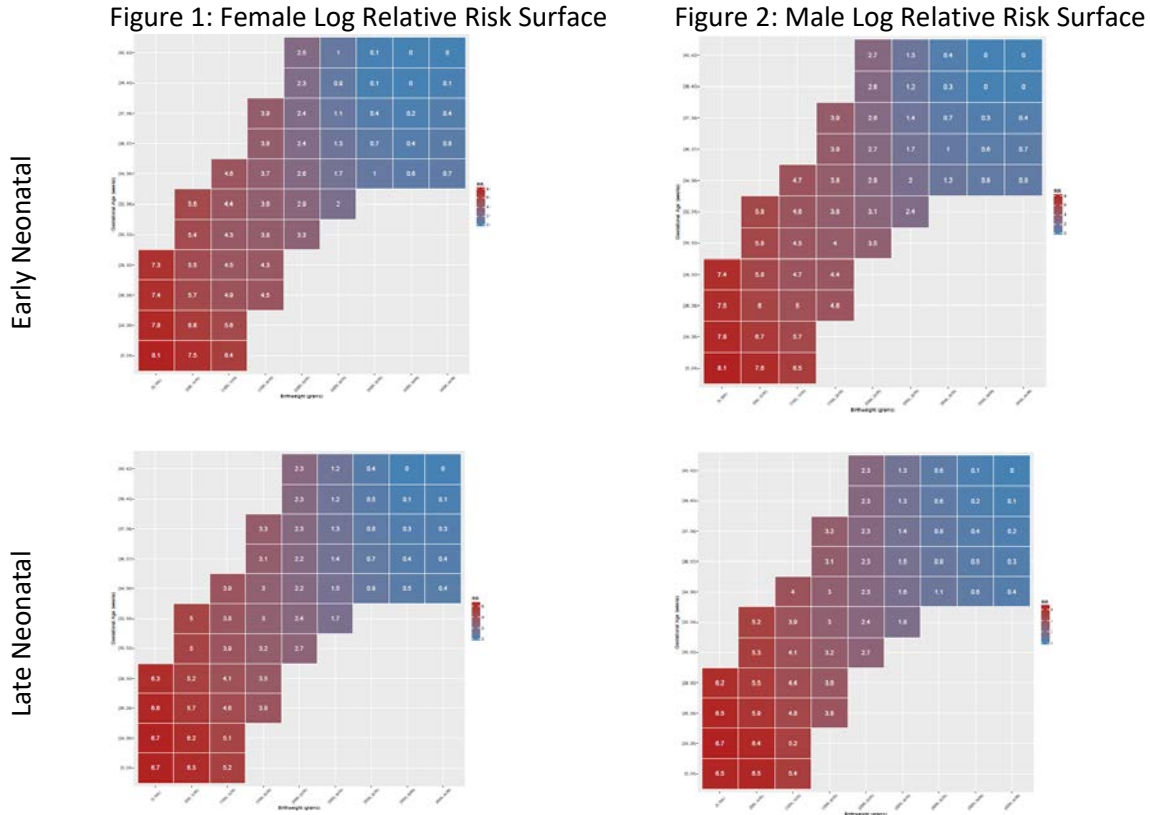

## PAF Calculations

The total PAF for the Low Birth Weight and Short Gestation joint risk factor is calculated by summing the PAF calculated from each 500g x 2wk category, with the lowest risk category among all the 500g x 2wk categories serving as the TMREL. The equation for calculating PAF for each 500g x 2wk category is:

$$PAF_{joasgt} = \frac{\sum_{x=1}^u RR_{joast}(x)P_{jasgt}(x) - RR_{joasg}(TMRE_{jas})}{\sum_{x=1}^u RR_{joas}(x)P_{jasgt}(x)}$$

To calculate the overall PAF for the Short gestation for birth weight risk factor, PAF was once again calculated for each joint 500-gram and 2-week category. Unlike the joint PAF calculation, which used only one TMREL for all 500-gram and 2-week categories, the joint 500-gram and 2-week category with

the lowest risk for each 500-gram birth weight grouping served as the TMREL for that 500-gram birth weight grouping. For example, the [3000, 3500) gram birth weight grouping contains five joint categories: [34, 36) weeks and [3000, 3500) grams; [36, 37) weeks and [3000, 3500) grams; [37, 38) weeks and [3000, 3500) grams; [38, 40) weeks and [3000, 3500) grams; and [40, 42) weeks and [3000, 3500) grams. The [40, 42) weeks and [3000, 3500) grams joint category has the lowest risk, and so it serves as the TMREL for the [3000, 3500) gram birth weight grouping. In the Relative Risk surface figures, a birth weight grouping is one “column” of the birth weight and gestational age matrix.

The overall PAF for the Short gestation for birth weight risk factor was then calculated for all the joint 500-gram and 2-week categories using the formula below:

$$PAF_{1..i} = 1 - \prod_{i=1}^n (1 - PAF_i)$$

The same methodology was applied to calculate the total PAF for the Low birth weight for gestation risk factor, using 2-week gestational age categories (each “row” of the matrix) instead of 500-gram birth weight categories. For example, the [24, 26) weeks gestational age grouping contains three joint categories: [0, 500) grams and [24, 26) weeks; [500, 1000) grams and [24, 26) weeks; and [1000, 1500) grams and [24, 26) weeks. The [1000, 1500) grams and [24, 26) weeks joint category has the lowest risk, and so it serves as the TMREL for the [24, 26) weeks gestational age grouping.

After the short gestation for birth weight PAF and low birth weight for gestational age PAF were calculated, they were then scaled so that the sum of the short gestation for birth weight PAF and low birth weight for gestation PAF equal the low birth weight and short gestation parent PAF calculated for each location/year/sex/age group.

# Iron Deficiency

## Flowchart

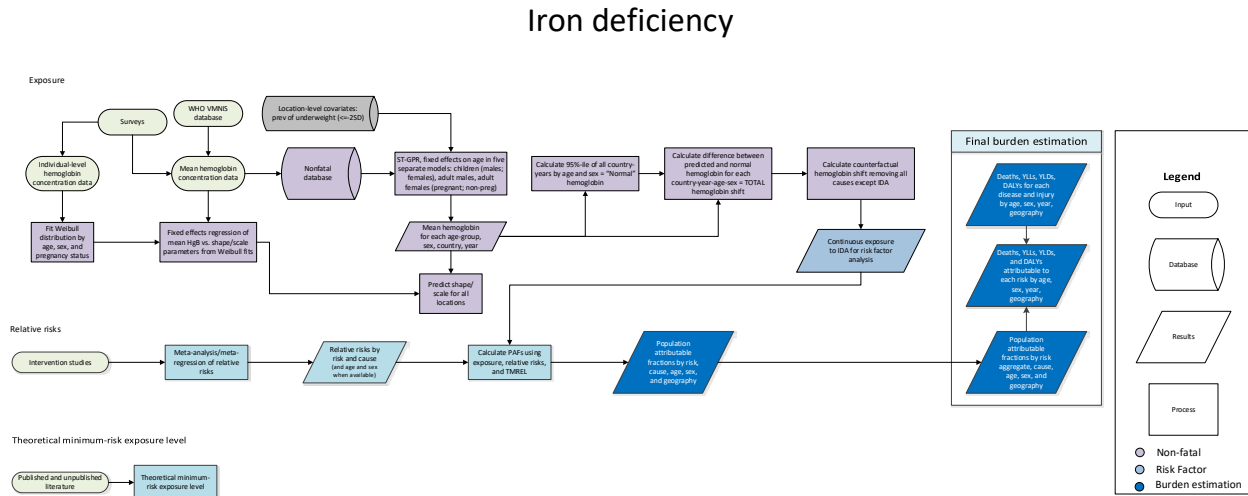

## Input Data and Methodological Summary

### Exposure

#### Case definition

For GBD 2016, as with GBD 2015, the anemia model has two main steps: estimation of the anemia envelope and causal attribution. Our analytic strategy began with calculation of an anemia envelope – a determination of mean hemoglobin, as well as a sum total of anemia prevalence, by severity for each country, age group, and both sexes for each year from 1990 through 2016. The envelope approach avoids double-counting while capturing potentially different disease profiles within each population group. We defined a population group as a specific geography, sex, age-group, and year.

#### Input data

Iron-deficiency anemia (IDA) estimates include acute and chronic hemorrhagic states for which supplementation may be helpful, but poor nutritional intake is not the only underlying problem. A few causes in this category – hookworm, schistosomiasis, upper gastrointestinal bleeding, and gynecologic diseases – were considered separately from IDA because there was enough data from GBD prevalence estimation processes to do so. Distribution of anemia burden to IDA only after assignment to “known” causes avoided double counting of these cases.

For our nonfatal anemia estimates, the envelope approach to the anemia impairment utilizes data from a variety of sources. Population-based surveys of hemoglobin concentration were the primary input to our analytic dataset. Examples include the Demographic and Health Survey (DHS) and Multiple Indicator Cluster Survey (MICS) series, along with other national and subnational surveys that completed hemoglobin testing. We supplemented with pertinent sources downloaded from the WHO Vitamin and Mineral Nutrition Information System (VMNIS) available at

<http://www.who.int/vmnis/database/anaemia/countries/en/>. A full source list is available elsewhere in this appendix. Most used a HemoCue test, adjusted for altitude, and excluded those with terminal or

acute medical conditions. Inclusion, exclusion and diagnostic criteria for other studies were similar and can be found in each study.

#### *Modeling strategy*

For GBD 2016, we estimated the mean hemoglobin in g/dL among women aged 15 to 49 years of age and the implied mean hemoglobin among women in the absence of iron deficiency anemia, as the risk exposure for maternal iron deficiency anemia.

#### Theoretical minimum-risk exposure level

The population normal hemoglobin concentration is the theoretical minimum risk exposure level. This was used to calculate exposures for iron deficiency by subtracting the iron deficiency shift from the population normal hemoglobin concentration for each demographic. For example, if the normal hemoglobin concentration among 30-34 year old women in Ethiopia was 134.5 g/L, and the shift was 1.6 g/L in that demographic, then the exposure was 132.9 g/L. The GBD 2016 anemia modeling strategy provides details on how the iron deficiency shifts and population normal hemoglobin concentrations were calculated.

#### Relative risk

We attribute 100% of iron-deficiency anemia to iron deficiency. The other outcomes are maternal hemorrhage and maternal sepsis and other maternal infections. Sources of evidence for these relative risks are unchanged from GBD 2013.

#### References

1. Centers for Disease Control and Prevention (CDC). Iron deficiency--United States, 1999-2000. *MMWR Morb Mortal Wkly Rep* 2002; 51: 897-9.
2. Looker AC, Dallman PR, Carroll MD, Gunter EW, Johnson CL. Prevalence of iron deficiency in the united states. *JAMA* 1997; 277: 973-6.

# Vitamin A Deficiency Capstone Appendix

## Flowchart

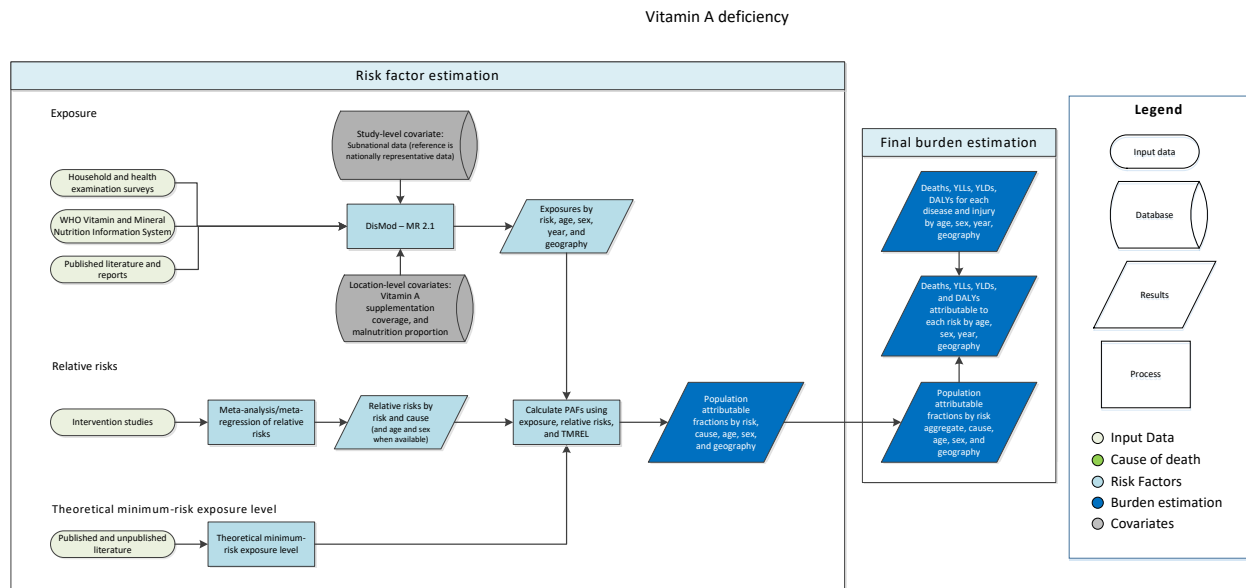

## Input Data & Methodological Summary

### Exposure

#### Definition

For GBD 2016, vitamin A deficiency is defined as serum retinol <70  $\mu\text{mol/L}$ . We examined vitamin A deficiency as a risk factor in children aged 6 months to 5 years.

To ensure we were using as much information as possible, and therefore maximize the data basis of our estimates, we modeled Vitamin A deficiency sequentially. The first step was to estimate the coverage of Vitamin A supplementation. Although the typical metric on which supplementation is tracked is 2+ doses of Vitamin A in the previous 12 months for children under 5 years, most existing health surveys do not routinely provide sufficient information to calculate it. Our case definition for the supplementation model was therefore the proportion of children 6-59 months of age who received at least one dose of Vitamin A in the previous 6 months. Supplementation estimates were then used as a location-level covariate to guide exposure models of overall Vitamin A deficiency.

## Input data

For GBD 2016, we used data from the WHO Vitamin and Mineral Nutrition Information System, health surveys such as DHS and MICS, and studies identified through literature review. A systematic review was last conducted for GBD 2013. The PubMed search terms were: ((vitamin A deficiency[Title/Abstract] AND prevalence[Title/Abstract]) AND (“2009”[Date – Publication] : “2013”[Date – Publication])). The table below shows the number of data points included in the final datasets. Exclusion criteria were:

1. Studies that were not population-based, e.g., hospital or clinic-based studies
2. Studies that did not provide primary data on epidemiological parameters, e.g., commentaries
3. Review articles
4. Case series
5. Self-reported cases

Table 1. Geographic representation of datasets used for three stages of Vitamin A deficiency risk factor burden estimation (number of data points per geography)

| Geography                    | Supplementation (proportion) | Deficiency (prevalence) | Vision Loss (Relative risk) | Vision Loss (prevalence) |
|------------------------------|------------------------------|-------------------------|-----------------------------|--------------------------|
| Global                       | 900                          | 365                     | 1                           | 81                       |
| East Asia                    | 12                           | 10                      |                             |                          |
| Southeast Asia               | 102                          | 45                      |                             | 21                       |
| Oceania                      | 24                           | 18                      |                             |                          |
| Central Asia                 | 51                           | 31                      |                             |                          |
| Central Europe               | 2                            | 1                       |                             |                          |
| Australasia                  |                              | 1                       |                             |                          |
| Southern Latin America       |                              | 1                       |                             |                          |
| High-income North America    |                              | 4                       |                             |                          |
| Caribbean                    | 17                           | 12                      |                             | 1                        |
| Andean Latin America         | 25                           | 10                      |                             |                          |
| Central Latin America        | 33                           | 54                      |                             | 1                        |
| Tropical Latin America       | 1                            | 2                       |                             | 2                        |
| North Africa and Middle East | 49                           | 37                      |                             | 18                       |
| South Asia                   | 61                           | 21                      |                             | 21                       |
| Central Sub-Saharan Africa   | 60                           | 9                       |                             | 1                        |
| Eastern Sub-Saharan Africa   | 182                          | 63                      |                             | 10                       |
| Southern Sub-Saharan Africa  | 49                           | 15                      |                             | 1                        |
| Western Sub-Saharan Africa   | 232                          | 31                      |                             | 5                        |

## Modeling Strategy

All Vitamin A deficiency estimates were made using DisMod-MR 2.2. As described above, we first estimated Vitamin A supplementation coverage. Although all data was from ages 6-59 months, we assumed no difference in age pattern of supplementation coverage and used the natural log of lag-distributed income per capita (LN-LDI) as a location-level covariate to inform estimates where data was absent. DHS and MICS data was cross-walked to the reference data source, which came from UNICEF (<http://data.worldbank.org/indicator/SN.ITK.VITA.ZS>).

Table 2: Covariate effects for Vitamin A supplementation model

| Measure    | Covariate            | Type          | Value                       | Exponentiated         |
|------------|----------------------|---------------|-----------------------------|-----------------------|
| Prevalence | MICS                 | Study-level   | -0.59<br>(-0.73 — -0.42)    | 0.56<br>(0.48 — 0.65) |
| Prevalence | DHS                  | Study-level   | -0.092<br>(-0.22 — 0.038)   | 0.91<br>(0.80 — 1.04) |
| Prevalence | LDI (I\$ per capita) | Country-level | 0.0094<br>(0.00061 — 0.039) | 1.01<br>(1.00 — 1.04) |

Second, we estimated the age- and sex-specific prevalence of Vitamin A deficiency (serum retinol < 0.7 µmol/L). WHO VMNIS was the primary data source for this model and was supplemented with data from DHS and other health surveys where testing was performed. We assumed the following in our model: no excess mortality, birth prevalence is possible, and that incidence and remission are both decreasing after age 5. Data from subnational locations was crosswalked to the reference data sources of nationally-representative data. Females were found to have 1.09 times higher Vitamin A deficiency, although the uncertainty in that ratio ranged from 0.97 to 1.24. Location-level covariates were used for Vitamin A supplementation coverage from the above model as well as GBD 2016 Socio-demographic Index (SDI) numbers.

Table 3: Covariate effects for Vitamin A deficiency model

| Measure    | Covariate             | Type          | Value                     | Exponentiated          |
|------------|-----------------------|---------------|---------------------------|------------------------|
| Prevalence | Sex                   | Study-level   | 0.086<br>(-0.027 — 0.21)  | 1.09<br>(0.97 — 1.24)  |
| Prevalence | Subnational           | Study-level   | 0.00074<br>(-0.15 — 0.17) | 1.00<br>(0.86 — 1.19)  |
| Prevalence | Vit A suppl. coverage | Country-level | -0.38<br>(-0.71 — -0.099) | 0.68<br>(0.49 — 0.91)  |
| Prevalence | SDI                   | Country-level | -2.25<br>(-2.87 — -1.36)  | 0.10<br>(0.057 — 0.26) |

### Theoretical minimum-risk exposure level

The theoretical minimum risk exposure is that the prevalence of vitamin A deficiency is zero.

### Relative risks

The relative risks have not changed from GBD 2015.



# Smoking Appendix

## Flowchart

### Smoking

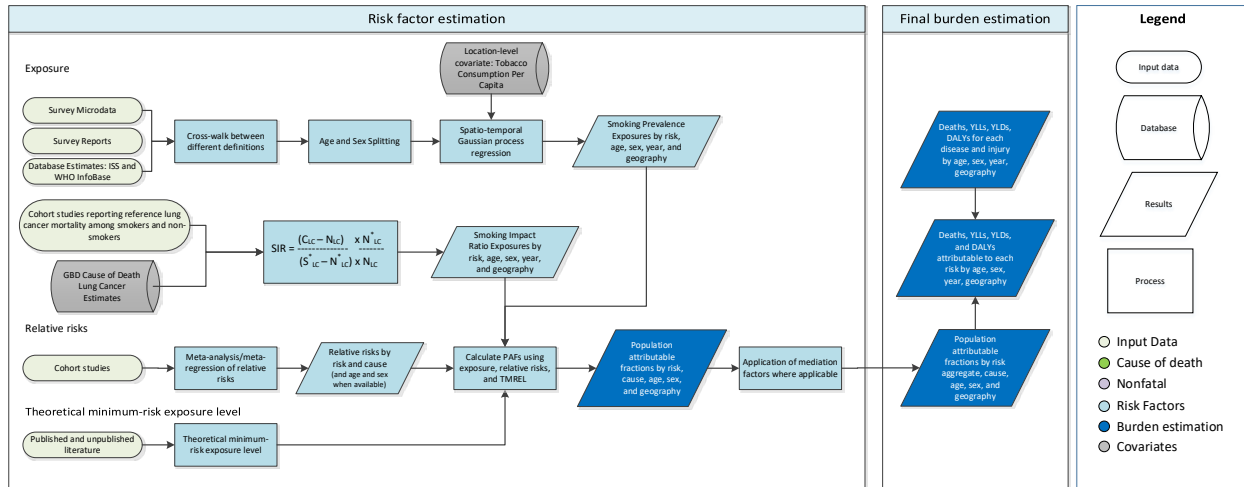

### Inclusion criteria

We included nationally representative survey data sources that captured information on primary tobacco use among individuals over age 10. We included only self-reported smoking data and excluded data from questions asking about others' smoking behaviors. We included data that was collected between 1 January 1980 and 31 December 2016.

### Data sources

A complete list of sources is available from the GBD 2016 Data Input Sources Tool.

### Prevalence

We searched the Global Health Data Exchange (GHDx) database for primary data sources with the keyword "Tobacco Use" on 1 January 2017 to ensure all available data sources were captured. Together, these sources comprised 6,216 location-years of data and 130,308 location-year-age-sex data points.

In addition to the primary data sources identified through the GHDx, we supplemented with secondary database estimates from the WHO InfoBase Database and International Smoking Statistics Database for sources for which primary data are unavailable. We included 275 sources from the WHO InfoBase and 199 sources from the International Smoking Statistics Database.

### Smoking Impact Ratio

The Smoking Impact Ratio (SIR) is computed using four estimates: 1) lung cancer mortality rates in a reference population of smokers, 2) lung cancer mortality rates in a reference population of never-smokers, 3) lung cancer mortality rates among never smokers in a population of interest, and 4) observed lung cancer mortality rates in a population of interest. We used available prospective cohort studies to estimate values 1, 2, and 3. A list of included prospective cohorts is available in the GBD 2016 Data Input Sources Tool. We used lung cancer mortality rate estimates from GBD 2016 for value 4.

## Relative risk

Relative risk estimates were derived from prospective cohort studies. Sources used in relative risk estimation are reported in Appendix Table 1.

## Smoking prevalence data preparation

### Data extraction

We extracted primary data from individual-level microdata and survey report tabulations. We extracted data on current, former, and/or ever smoked tobacco use reported as any combination of frequency of use (daily, occasional, and unspecified, which includes both daily and occasional smokers) and type of smoked tobacco used (all smoked tobacco, cigarettes, hookah, and other smoked tobacco products such as cigars or pipes), resulting in 36 possible combinations. Other variants of tobacco products, for example hand-rolled cigarettes, were grouped into the four type categories listed above based on product similarities. Only smoked tobacco products are included, smoked drugs are estimated separately as part of the drug use risk factor.

For microdata, we extracted relevant demographic information, including age, sex, location, and year, as well as survey metadata, including survey weights, primary sampling units, and strata. This information allowed us to tabulate individual-level data in the standard GBD five-year age-sex groups and produce accurate estimates of uncertainty. For survey report tabulations, we extracted data at the most granular age-sex group provided.

### Crosswalking

Our case-definition for smoking prevalence is daily use of any smoked tobacco products. All other data points were adjusted to be consistent with this definition. Some sources contained information on more than one indicator and these sources were used to develop the adjustment coefficient to transform that alternative definition to the GBD standard case-definition of daily use of smoked tobacco. The adjustment coefficient was the beta value derived from the following model:

$$p_{\text{daily-smoked},k} = \beta p_{i,k} + \epsilon_k$$

where  $p_{\text{daily-smoked},k}$  is the prevalence of daily smoking reported in survey  $k$  and  $p_{i,k}$  is the prevalence of an alternative frequency-type combination  $i$  also reported in survey  $k$ . Models with adjusted R-squared values  $> 0.8$  were used in order of their R-squared value. We fit the regression using the maximum of either 1) the 200 closest sources to the source to be crosswalked, or 2) all data from the same region as the source to be crosswalked.

For each source that needed adjusting, we assigned space weights based on GBD region and super-region to the sources containing more than one case definition. Data from the same region receiving a full weight of 1, and data from the same super-region received a weight of  $\frac{1}{2}$ . We explored using a time weight, as we do in the age-sex splitting process, to control for possible changes in the relationship between smoking behaviors over time. We found incorporating temporal information did not significantly change the estimated coefficients but did undercut sample sizes, and chose to exclude the time weight. Crosswalk coefficients generated from fewer than 20 data sources were dropped.

We generated separate crosswalk coefficients for the 10-14 age group and the 15-19 age group, as we found the relationships between case definitions differed strongly in the younger age groups compared

to the 20+ age groups. Due to data limitations, we generated a global crosswalk coefficient for both the 10-14 and 15-19 age groups, using the same regression as above.

The estimated regression coefficients used for adjustment are reported in Tables 1 (a,b,c) below.

We propagated uncertainty at the survey (k) level from the crosswalk using the following equation:

$$PE_k = \sigma_\epsilon^2 + X_k^2 \text{var}(\hat{\beta})$$

where  $PE_k$  is the crosswalk prediction error that is added to the sampling variance of the data point,  $\sigma_\epsilon^2$  is the variance of the error,  $X_k^2$  is the squared value of the data being adjusted, and  $\text{var}(\hat{\beta})$  is the variance of the adjustment coefficient.

### Age and sex splitting

We split data reported in broader age groups than the GBD 5-year age groups or as both sexes combined by adapting the method reported in Ng et al. (<http://jamanetwork.com/journals/jama/fullarticle/1812960>) to split using a sex- geography- time-specific reference age pattern. We separated the data into two sets: a training dataset, with data already falling into GBD sex-specific 5-year age groups, and a split dataset, which reported data in aggregated age or sex groups. Each source reporting aggregated data was temporarily duplicated into correct GBD categorizations covering their form of aggregation. These duplicated age groups were iteratively matched to the closest 200 sources of the same age and sex in the training dataset by geography and time. The mean of these 200 sources was used to generate an estimate for each duplicated estimate. Finally, we multiplied the original aggregated estimate by the population-weighted ratio of the mean estimates generated from the training data.

Similar to the crosswalk, we defined the “closest” sources in space by assigning space weights based on GBD regions. If a training source was from the same country or subnational unit as the source to be split, it received a full space weight of 1. If from a different country but the same region, it received a space weight of .66. If the sources only shared a super\_region, it received a space weight of .33. The time weights were generated using the equation:

$$\text{Time weight} = 1 - \text{abs}(\text{year}_{\text{train}} - \text{year}_{\text{split}}) * .05$$

Essentially, sources from the training dataset published in the same year as the source to be split would receive a full time weight of 1, with diminishing weight as the difference in publication years increased. The time weight and space weight each made up 50% of a combined total weight. The 200 training sources with the highest total weights were then used to estimate the mean prevalence pattern for each source in need of splitting.

### Smoking prevalence modeling

We used ST-GPR to model smoking prevalence given the abundance of age and sex-specific data. Full details on the ST-GPR method are available elsewhere. Briefly, the mean function input to GPR is a complete time series of estimates generated from a mixed effects hierarchical linear model plus

weighted residuals smoothed across time, space, and age. The linear model formula, fit separately by sex using restricted maximum likelihood in R, is:

$$\text{logit}(p_{g,a,t}) = \beta_0 + \beta_1 \text{CPC}_{g,t} + \sum_{k=2}^{19} \beta_k I_{A[a]} + \alpha_s + \alpha_r + \alpha_g + \epsilon_{g,a,t}$$

where  $\text{CPC}_{g,t}$  is the tobacco consumption covariate, by geography  $g$  and time  $t$ , described above,  $I_{A[a]}$  is a dummy variable indicating specific age group  $A$  that the prevalence point  $p_{g,a,t}$  captures, and  $\alpha_s$ ,  $\alpha_r$ , and  $\alpha_g$  are super region, region, and geography random intercepts, respectively. Random effects were used in model fitting but were not used in prediction.

We used out-of-sample cross validation for hyperparameter selection for the space (zeta), age (omega), and time (lambda) weights used in spatiotemporal smoothing along with the scale used in Gaussian process regression (details on the effects of different parameters have been previously published). We used a space weight of 0.95 in data-dense countries (at least five years covered in a geography-age-sex group) and space weight of 0.7 in data-sparse countries. The other parameters were consistent across data-density levels: age weight = 1, time weight = 1, and scale = 10.

### Smoking Impact Ratio calculation

We calculated SIR for each geography, year, age group, and sex included in attributable burden analysis using the following formula:

$$SIR = \frac{C_{LC} - N_{LC}}{S_{LC}^* - N_{LC}^*} \times \frac{N_{LC}^*}{N_{LC}}$$

where  $C_{LC}$  is the lung cancer mortality rate specific to the age-sex-geography-year of interest,  $N_{LC}$  is the age- sex- geography- year-specific lung cancer mortality rate of never-smokers in the population of interest,  $S_{LC}^*$  is the lung cancer mortality rate in a reference population of smokers,  $N_{LC}^*$  is the lung cancer mortality rate in a reference population of never-smokers. Additional details on SIR calculation have been described elsewhere.

### Estimating attributable burden

#### Assessment of risk-outcome pairs

We conducted a systematic literature review of meta-analyses, pooled analyses, and systematic reviews on the effects of smoking on health outcomes. We searched PubMed on December 14, 2016 using the following search string: ("Tobacco Smoke Pollution"[Mesh] OR "Smoking"[Mesh] OR "Smoking"[TiAb] OR "Tobacco Smoke"[tiab] OR "Passive Smoke"[tiab] OR "Secondhand Smoke"[tiab] OR "Second hand smoke"[tiab]) AND (Meta-Analysis[ptyp] OR "systematic review"[tiab] OR "pooled"[tiab]). The search yielded 4,506 sources which were reviewed. Sources were included if the outcome of interest was included in GBD, if at least one prospective cohort study was included, and if the summary effect size reported was statistically significant. Seven disease outcomes that were not included in GBD 2015 met inclusion criteria. For these outcomes, we completed causal criteria tables and evaluated the strength of evidence supporting a causal relationship. For GBD 2016 we also dropped 5 outcomes that were previously included in GBD 2015 (pneumoconiosis, coal worker's pneumoconiosis, asbestosis, silicosis, and interstitial lung disease and pulmonary sarcoidosis) for which there was insufficient evidence to support a causal effect, resulting in a total of 49 outcomes. Appendix Table 2 reports the strength of

evidence for included outcomes and the exposure metric (5-year lagged prevalence or SIR) used for each outcome. Appendix Table 2 reports the sources used in evaluating strength of included outcomes. New outcomes for GBD 2016 are: breast cancer, prostate cancer, Alzheimer disease, Parkinson disease, multiple sclerosis, gallbladder and biliary tract disease, and low back pain.

### Relative risk

Appendix Table 1 reports relative risk estimates and uncertainty for the 49 outcomes included in analysis, by age and sex where applicable. Sources used in generating relative risk estimates are cited in the GBD 2016 Data Input Sources Tool.

### Figures and Tables

Table 1a: Crosswalk coefficients for adult (20+ years) age group, by region

| Crosswalk Coefficients, Ages 20+ |                              |                       |                 |                                      |
|----------------------------------|------------------------------|-----------------------|-----------------|--------------------------------------|
| Indicator                        | Region                       | Crosswalk Coefficient | R-squared value | Number of sources used in regression |
| Current use of cigarettes        | East Asia                    | 0.931                 | 0.991           | 199                                  |
| Current use of cigarettes        | Southeast Asia               | 0.967                 | 0.994           | 127                                  |
| Current use of cigarettes        | Oceania                      | 0.931                 | 0.991           | 199                                  |
| Current use of cigarettes        | Central Asia                 | 0.969                 | 0.996           | 583                                  |
| Current use of cigarettes        | Central Europe               | 0.963                 | 0.996           | 325                                  |
| Current use of cigarettes        | Eastern Europe               | 0.976                 | 0.996           | 253                                  |
| Current use of cigarettes        | High-income Asia Pacific     | 0.881                 | 0.954           | 6181                                 |
| Current use of cigarettes        | Australasia                  | 0.881                 | 0.954           | 6181                                 |
| Current use of cigarettes        | Western Europe               | 0.804                 | 0.915           | 645                                  |
| Current use of cigarettes        | Southern Latin America       | 0.881                 | 0.954           | 6181                                 |
| Current use of cigarettes        | High-income North America    | 0.894                 | 0.959           | 5486                                 |
| Current use of cigarettes        | Caribbean                    | 0.797                 | 0.953           | 184                                  |
| Current use of cigarettes        | Andean Latin America         | 0.895                 | 0.961           | 4189                                 |
| Current use of cigarettes        | Central Latin America        | 0.895                 | 0.961           | 4189                                 |
| Current use of cigarettes        | Tropical Latin America       | 0.911                 | 0.969           | 3918                                 |
| Current use of cigarettes        | North Africa and Middle East | 0.927                 | 0.979           | 96                                   |
| Current use of cigarettes        | South Asia                   | 0.911                 | 0.968           | 695                                  |
| Current use of cigarettes        | Central Sub-Saharan Africa   | 0.984                 | 0.995           | 94                                   |
| Current use of cigarettes        | Eastern Sub-Saharan Africa   | 0.984                 | 0.995           | 94                                   |
| Current use of cigarettes        | Southern Sub-Saharan Africa  | 0.984                 | 0.995           | 94                                   |
| Current use of cigarettes        | Western Sub-Saharan Africa   | 0.984                 | 0.995           | 94                                   |

|                              |                              |       |       |      |
|------------------------------|------------------------------|-------|-------|------|
| Current use of cigarettes    | East Asia                    | 1.012 | 1     | 103  |
| Current use of cigarettes    | Southeast Asia               | 1.057 | 0.98  | 268  |
| Current use of cigarettes    | Oceania                      | 1.01  | 0.983 | 131  |
| Current use of cigarettes    | Central Europe               | 1.002 | 0.999 | 498  |
| Current use of cigarettes    | High-income Asia Pacific     | 1.024 | 0.973 | 6647 |
| Current use of cigarettes    | Australasia                  | 1.024 | 0.973 | 6647 |
| Current use of cigarettes    | Western Europe               | 1.008 | 0.994 | 1085 |
| Current use of cigarettes    | Southern Latin America       | 1.024 | 0.973 | 6647 |
| Current use of cigarettes    | High-income North America    | 1.028 | 0.968 | 5486 |
| Current use of cigarettes    | Caribbean                    | 1.045 | 0.981 | 211  |
| Current use of cigarettes    | North Africa and Middle East | 1.036 | 0.989 | 227  |
| Current use of cigarettes    | South Asia                   | 1.045 | 0.963 | 993  |
| Current use of cigarettes    | Central Sub-Saharan Africa   | 1.026 | 0.903 | 746  |
| Current use of cigarettes    | Eastern Sub-Saharan Africa   | 1.008 | 0.919 | 184  |
| Current use of cigarettes    | Southern Sub-Saharan Africa  | 1.04  | 0.946 | 276  |
| Occasional use of cigarettes | Central Sub-Saharan Africa   | 0.991 | 0.949 | 53   |
| Occasional use of cigarettes | Eastern Sub-Saharan Africa   | 0.991 | 0.949 | 53   |
| Occasional use of cigarettes | Southern Sub-Saharan Africa  | 0.991 | 0.949 | 53   |
| Occasional use of cigarettes | Western Sub-Saharan Africa   | 0.991 | 0.949 | 53   |
| Ever user of cigarettes      | East Asia                    | 0.809 | 0.984 | 58   |
| Ever user of cigarettes      | Southeast Asia               | 0.809 | 0.984 | 58   |
| Ever user of cigarettes      | Oceania                      | 0.809 | 0.984 | 58   |
| Ever user of cigarettes      | Central Asia                 | 0.498 | 0.819 | 165  |
| Ever user of cigarettes      | Central Europe               | 0.508 | 0.821 | 133  |
| Ever user of cigarettes      | Eastern Europe               | 0.498 | 0.819 | 165  |
| Ever user of cigarettes      | High-income Asia Pacific     | 0.474 | 0.871 | 4322 |
| Ever user of cigarettes      | Australasia                  | 0.474 | 0.871 | 4322 |
| Ever user of cigarettes      | Western Europe               | 0.395 | 0.803 | 255  |
| Ever user of cigarettes      | Southern Latin America       | 0.474 | 0.871 | 4322 |
| Ever user of cigarettes      | High-income North America    | 0.479 | 0.875 | 4067 |
| Ever user of cigarettes      | Caribbean                    | 0.374 | 0.856 | 151  |
| Ever user of cigarettes      | Central Sub-Saharan Africa   | 0.773 | 0.991 | 25   |
| Ever user of cigarettes      | Eastern Sub-Saharan Africa   | 0.773 | 0.991 | 25   |

|                                   |                              |       |       |      |
|-----------------------------------|------------------------------|-------|-------|------|
| Ever user of cigarettes           | Southern Sub-Saharan Africa  | 0.773 | 0.991 | 25   |
| Ever user of cigarettes           | Western Sub-Saharan Africa   | 0.773 | 0.991 | 25   |
| Ever used cigarettes daily        | Central Asia                 | 0.544 | 0.831 | 170  |
| Ever used cigarettes daily        | Central Europe               | 0.544 | 0.833 | 133  |
| Ever used cigarettes daily        | Eastern Europe               | 0.544 | 0.831 | 170  |
| Ever used cigarettes daily        | High-income Asia Pacific     | 0.447 | 0.823 | 255  |
| Ever used cigarettes daily        | Australasia                  | 0.447 | 0.823 | 255  |
| Ever used cigarettes daily        | Western Europe               | 0.447 | 0.823 | 255  |
| Ever used cigarettes daily        | Southern Latin America       | 0.447 | 0.823 | 255  |
| Ever used cigarettes daily        | High-income North America    | 0.447 | 0.823 | 255  |
| Current use of any smoked tobacco | East Asia                    | 0.913 | 0.993 | 2633 |
| Current use of any smoked tobacco | Southeast Asia               | 0.829 | 0.977 | 483  |
| Current use of any smoked tobacco | Oceania                      | 0.844 | 0.949 | 235  |
| Current use of any smoked tobacco | Central Asia                 | 0.865 | 0.981 | 123  |
| Current use of any smoked tobacco | Central Europe               | 0.896 | 0.982 | 592  |
| Current use of any smoked tobacco | Eastern Europe               | 0.896 | 0.983 | 563  |
| Current use of any smoked tobacco | High-income Asia Pacific     | 0.851 | 0.983 | 7227 |
| Current use of any smoked tobacco | Australasia                  | 0.719 | 0.954 | 145  |
| Current use of any smoked tobacco | Western Europe               | 0.849 | 0.971 | 1471 |
| Current use of any smoked tobacco | Southern Latin America       | 0.851 | 0.983 | 7227 |
| Current use of any smoked tobacco | High-income North America    | 0.855 | 0.987 | 5517 |
| Current use of any smoked tobacco | Caribbean                    | 0.787 | 0.96  | 263  |
| Current use of any smoked tobacco | Andean Latin America         | 0.744 | 0.915 | 9048 |
| Current use of any smoked tobacco | Central Latin America        | 0.615 | 0.837 | 1040 |
| Current use of any smoked tobacco | Tropical Latin America       | 0.858 | 0.966 | 7703 |
| Current use of any smoked tobacco | North Africa and Middle East | 0.915 | 0.979 | 389  |

|                                   |                             |       |       |      |
|-----------------------------------|-----------------------------|-------|-------|------|
| Current use of any smoked tobacco | South Asia                  | 0.809 | 0.945 | 1719 |
| Current use of any smoked tobacco | Central Sub-Saharan Africa  | 0.875 | 0.973 | 883  |
| Current use of any smoked tobacco | Eastern Sub-Saharan Africa  | 0.918 | 0.975 | 300  |
| Current use of any smoked tobacco | Southern Sub-Saharan Africa | 0.817 | 0.976 | 213  |
| Current use of any smoked tobacco | Western Sub-Saharan Africa  | 0.872 | 0.983 | 349  |
| Occasional use of smoked tobacco  | High-income Asia Pacific    | 1.254 | 0.812 | 6860 |
| Occasional use of smoked tobacco  | Southern Latin America      | 1.254 | 0.812 | 6860 |
| Occasional use of smoked tobacco  | High-income North America   | 1.283 | 0.838 | 5476 |
| Occasional use of smoked tobacco  | Central Latin America       | 0.844 | 0.818 | 258  |
| Ever used any smoked tobacco      | East Asia                   | 0.676 | 0.886 | 180  |
| Ever used any smoked tobacco      | Southeast Asia              | 0.676 | 0.886 | 180  |
| Ever used any smoked tobacco      | Oceania                     | 0.676 | 0.886 | 180  |
| Ever used any smoked tobacco      | Central Europe              | 0.468 | 0.825 | 193  |
| Ever used any smoked tobacco      | High-income Asia Pacific    | 0.467 | 0.867 | 5957 |
| Ever used any smoked tobacco      | Australasia                 | 0.467 | 0.867 | 5957 |
| Ever used any smoked tobacco      | Southern Latin America      | 0.467 | 0.867 | 5957 |
| Ever used any smoked tobacco      | High-income North America   | 0.49  | 0.879 | 5397 |
| Ever used any smoked tobacco      | Caribbean                   | 0.353 | 0.828 | 184  |
| Ever used any smoked tobacco      | South Asia                  | 0.456 | 0.81  | 812  |
| Ever used any smoked tobacco      | Central Sub-Saharan Africa  | 0.878 | 0.956 | 42   |
| Ever used any smoked tobacco      | Eastern Sub-Saharan Africa  | 0.878 | 0.956 | 42   |
| Ever used any smoked tobacco      | Southern Sub-Saharan Africa | 0.878 | 0.956 | 42   |
| Ever used any smoked tobacco      | Western Sub-Saharan Africa  | 0.878 | 0.956 | 42   |



|                                    |                              |       |       |     |
|------------------------------------|------------------------------|-------|-------|-----|
| Ever used any smoked tobacco daily | East Asia                    | 0.687 | 0.94  | 81  |
| Ever used any smoked tobacco daily | Southeast Asia               | 0.687 | 0.94  | 81  |
| Ever used any smoked tobacco daily | Oceania                      | 0.687 | 0.94  | 81  |
| Ever used any smoked tobacco daily | Central Asia                 | 0.589 | 0.86  | 230 |
| Ever used any smoked tobacco daily | Central Europe               | 0.578 | 0.85  | 185 |
| Ever used any smoked tobacco daily | Eastern Europe               | 0.589 | 0.86  | 230 |
| Ever used any smoked tobacco daily | North Africa and Middle East | 0.67  | 0.935 | 65  |
| Ever used any smoked tobacco daily | South Asia                   | 0.857 | 0.961 | 221 |
| Ever used any smoked tobacco daily | Central Sub-Saharan Africa   | 0.668 | 0.96  | 213 |
| Ever used any smoked tobacco daily | Eastern Sub-Saharan Africa   | 0.668 | 0.96  | 213 |
| Ever used any smoked tobacco daily | Southern Sub-Saharan Africa  | 0.668 | 0.96  | 213 |
| Ever used any smoked tobacco daily | Western Sub-Saharan Africa   | 0.645 | 0.954 | 104 |

Table 1b: Global crosswalk coefficients for 10-14 age group

| <b>Crosswalk coefficients for 10-14 age group</b>      |                       |                 |                                      |
|--------------------------------------------------------|-----------------------|-----------------|--------------------------------------|
| Indicator                                              | Crosswalk Coefficient | R-squared value | Number of sources used in regression |
| Current use of cigarettes                              | 1.082                 | 0.992           | 262                                  |
| Current use of smoked tobacco other than cigarettes    | 1.005                 | 0.891           | 113                                  |
| Occasional use of smoked tobacco other than cigarettes | 0.774                 | 0.882           | 28                                   |

Table 1c: Global crosswalk coefficients for 15-19 age-group

| <b>Crosswalk coefficients for 15-19 age group</b> |                       |                 |                                      |
|---------------------------------------------------|-----------------------|-----------------|--------------------------------------|
| Indicator                                         | Crosswalk Coefficient | R-squared value | Number of sources used in regression |
| Ever user of cigarettes                           | 0.604                 | 0.898           | 357                                  |
| Ever used cigarettes daily                        | 0.942                 | 0.986           | 22                                   |
| Ever used any smoked tobacco daily                | 0.8                   | 0.92            | 148                                  |

# Secondhand Smoke Capstone Appendix

## Flowchart

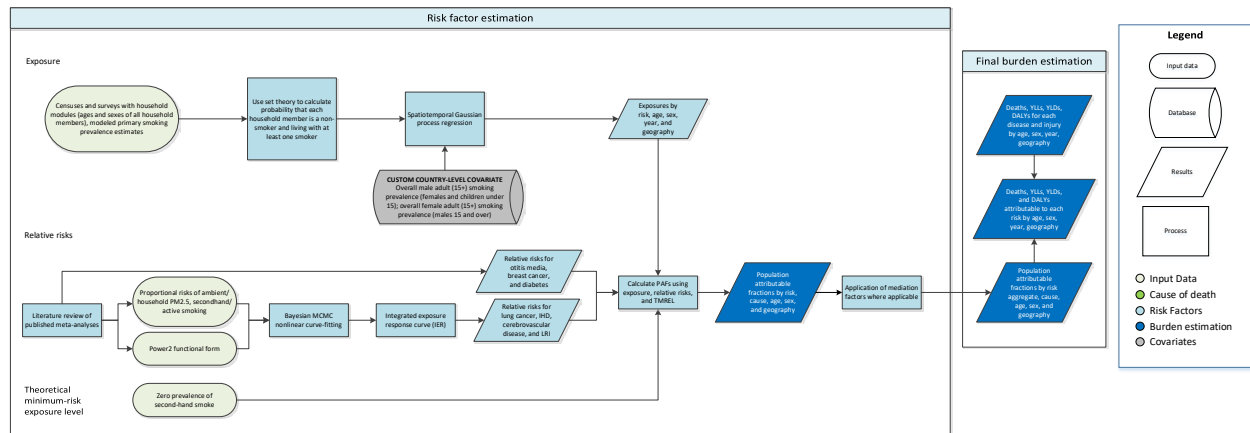

## Exposure

### Case Definition

We define secondhand smoke exposure as exposure to tobacco smoke among non-smokers by a household member. We use household composition as a proxy for exposure and make the assumption that all persons living with a daily smoker are exposed to tobacco smoke. Non-smokers are defined as all persons who are not daily smokers. Ex-smokers and occasional smokers are considered non-smokers in this analysis. Exposure was evaluated for both children and adults. This analysis does not include exposure to secondhand smoke through social networks or at a workplace.

### Input data

To calculate the proportion of non-smokers who live with at least one smoker, we used unit record data on household composition, which included the ages and sexes of all persons living in the same household. Our sources included representative major survey series with a household composition module, including the Demographic Health Surveys (DHS), the Multiple Indicator Cluster Surveys (MICS), and the Living Standards Measurement Surveys (LSMS); and national and subnational censuses, which included those captured in the IPUMS project and identified using the Global Health Data Exchange catalog (GHDx).

Estimates of primary smoking prevalence in each location were also used in our calculations.

### Modelling strategy

We made several substantial changes to our modelling strategy for secondhand smoke for GBD 2016. First, we ran a spatiotemporal Gaussian process regression (ST-GPR), whereas the model from GBD 2015 used DisMod-MR. Both methods modeled separately by sex, but the DisMod-MR method from GBD 2015 included children (under age 15) of both sexes in the female model and modeled adult males (age 15+) alone. Second, we used overall adult (age 15+) smoking prevalence in lieu of of age-standardized smoking prevalence as a covariate in the model (described in further detail below). Third, we used

mathematics (methods described below) to estimate the proportion of a population exposed, instead of using survey data asking more directly about exposure.

We estimated the probability that each person is living with a smoker and is also a non-smoker themselves using set theory. First, household composition data were used at the individual level to capture the ages and sexes of each person in the household. Second, we analyzed surveys with both household composition data and tobacco use questions and determined that the distribution of household size, mean age of the household members, and the age distribution were not significantly different between households with and without a self-reported smoker. Since we did not find that household composition varied between smokers and non-smokers, we then used the GBD 2016 primary smoking prevalence model to calculate the probability that each household member is a smoker. Next, we used the probability of the union of sets on each individual household member to calculate the overall probability that at least one of the other household members was a smoker. Finally, we multiplied this output by the probability that the respondent was not a smoker themselves (i.e. 1 minus primary smoking prevalence for that person's location, year, age, and sex). Once the microdata are collapsed into tabulations by location, year, age, sex, and survey iteration, these calculations give estimates for the proportion of each population who are both living with one or more smokers and are not smokers themselves.

These probabilities were modeled in the GBD ST-GPR framework, which generates exposure estimates from a mixed effects hierarchical linear model plus weighted residuals smoothed across time, space, and age. The linear model formula was fit separately by sex using restricted maximum likelihood in R.

We used the sex-specific overall smoking prevalence for adults (age 15 and older) as a country-level covariate in the model. The overall male adult daily smoking prevalence was used as the covariate for females of all ages and for males under age 15. The overall female adult daily smoking prevalence was used as the covariate for males age 15 and older. This was a modelling change from GBD 2015, in which we used the male age-standardized smoking prevalence for the adult female and children under 15 model, and the female age-standardized smoking prevalence for the adult male model.

All input data points from the probability calculation had a measure of uncertainty (variance and sample size) coming from the uncertainty of the primary smoking prevalence model and the sample size from the unit record data going into the modelling process. Geographic random effects were used in model fitting but were not used in prediction.

### Theoretical minimum-risk exposure level

The theoretical minimum-risk exposure level for secondhand smoke is zero exposure among non-smokers, meaning that non-smokers would not live with any primary smokers.

### Relative risks

For children ages 0-14, we estimated the burden of otitis media attributable to secondhand smoke exposure. For all ages we estimated the burden of lower respiratory infections (LRI), and for adults greater or equal to 25 years of age we estimated the burden of lung cancer, chronic obstructive pulmonary disease (COPD), ischemic heart disease, and cerebrovascular disease attributable to secondhand smoke exposure. This year, we found significant evidence for associations between secondhand smoke exposure and two additional outcomes: breast cancer and diabetes. These were added to the list of risk-outcome pairs for secondhand smoke exposure.

For lung cancer, ischemic heart disease, cerebrovascular disease, and LRI, we used country-specific relative risks created using integrated exposure response curves (IER) for PM2.5 air pollution. The relative risks for otitis media, breast cancer, and diabetes are derived from published meta-analyses.

We used the traditional GBD population attributable fraction (PAF) equation to estimate burden based on exposure and relative risks.

# Smokeless Tobacco

## Flowchart

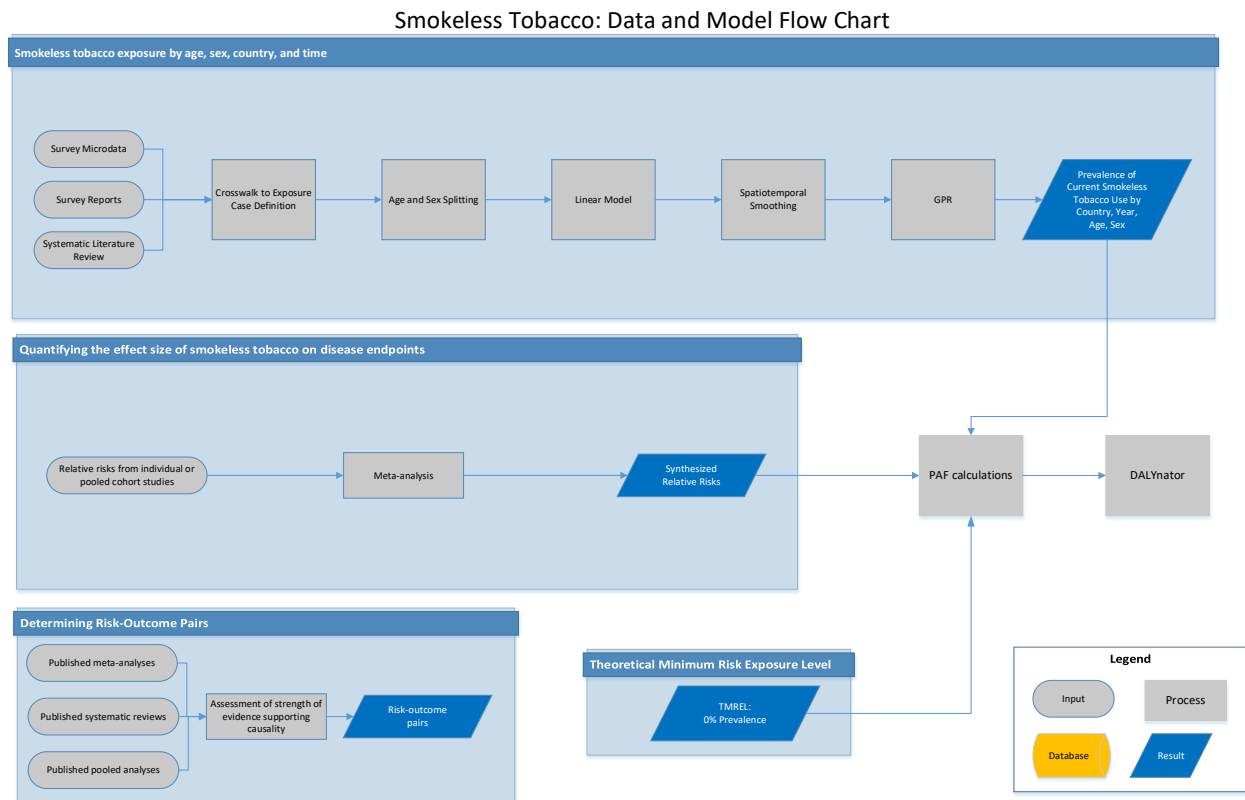

## Input data and Methodological Summary

### Input data

#### *Inclusion criteria*

We included sources that reported primary smokeless tobacco use among respondents over age 10. To be eligible for inclusion, sources had to be representative for their level of estimation (ie. national sources needed to be nationally representative, subnational sources subnationally representative). We included only self-reported smokeless tobacco use data and excluded data from questions asking about others' tobacco use behaviors. We included data collected between 1 January 1980 and 31 December 2016.

#### *Data sources*

A complete list of sources is available from the GBD 2016 Data Input Sources Tool (<http://ghdx.healthdata.org/gbd-2016/data-input-sources>).

#### *Prevalence*

We searched the Global Health Data Exchange (GHDx) database for primary data sources with the keyword "Tobacco Use" on January 1, 2017 to ensure all available data sources were captured. Of the 3,318 sources identified in the GHDx, 1,578 country-year sources met inclusion criteria and were included.

In addition to the primary data sources identified through the GHDx, we performed a systematic literature search on PubMed. The search was conducted on January 19, 2017 and returned 5982 hits, of which 267 were eligible for inclusion. Of these 267 sources, 200 had already been identified in the GHDx, so the Pubmed search yielded 67 additional sources overall. Figure 1 presents the PRISMA flowchart for the systematic literature review. The search string is shown below:

("smokeless tobacco"[tiab] OR "Tobacco, Smokeless"[Mesh] OR *bajjar*[tiab] OR ("betel quid"[tiab] AND tobacco[tiab]) OR "chewing tobacco"[tiab] OR *chimó*[tiab] OR snuff[tiab] OR *snuif*[tiab] OR *dip*[tiab] OR *dohra*[tiab] OR *gudakhu*[tiab] OR *gul*[tiab] OR *gutka*[tiab] OR *gutkha*[tiab] OR "hnat hsey"[tiab] OR *iq'mik*[tiab] OR *khaini*[tiab] OR *kharra*[tiab] OR *khiwam*[tiab] OR *khimam*[tiab] OR *kiwam*[tiab] OR *kimam*[tiab] OR "lal dant manjan"[tiab] OR ("loose leaf"[tiab] AND (chew[tiab] OR tobacco[tiab])) OR *mainpuri*[tiab] OR *maras*[tiab] OR *mawa*[tiab] OR *mshri*[tiab] OR *naffa*[tiab] OR *nas*[Supplementary Concept] OR ((*nas*[tiab] OR *nass*[tiab]) AND tobacco[tiab]) OR *naswar*[tiab] OR *nasway*[tiab] OR *nasvay*[tiab] OR *neffa*[tiab] OR ((*pan*[tiab] OR *paan*[tiab]) AND tobacco[tiab]) OR (plug[tiab] AND tobacco[tiab]) OR (*rapé*[tiab] AND tobacco[tiab]) OR ((*red*[tiab] OR tobacco[tiab]) AND (toothpowder[tiab] OR toothpaste[tiab])) OR *shammah*[tiab] OR *snus*[tiab] OR *taaba*[tiab] OR *tapkeer*[tiab] OR *tawa*[tiab] OR *tombol*[tiab] OR *toombak*[tiab] OR *tuibur*[tiab] OR "tobacco water"[tiab] OR (twist[tiab] AND tobacco[tiab]) OR *zarda*[tiab]) AND Humans[Mesh] AND English[Language] NOT Case Reports[ptyp]

## Smokeless tobacco prevalence data preparation

### Data extraction

We extracted primary data from individual-level microdata and survey report tabulations. We extracted data on current, former, and/or ever smokeless tobacco use as well as frequency of use (daily, occasional, and unspecified, which includes both daily and occasional smokers). We included all smokeless tobacco products in estimating exposure. Smokeless products that do not include tobacco, such as betel quid without tobacco, are excluded or estimated separately as part of the drug use risk factor, if applicable.

For microdata, we extracted relevant demographic information, including age, sex, location, and year, as well as survey metadata, including survey weights, primary sampling units, and strata. This information allowed us to tabulate individual-level data in the standard GBD five-year age-sex groups and produce accurate estimates of uncertainty. For survey report tabulations, we extracted data at the most granular age-sex group provided.

### Crosswalking

Our GBD smokeless tobacco case definition is current use of any smokeless tobacco product. All other data points were adjusted to be consistent with this definition. Table 1 shows the number of data points extracted for each indicator. Some sources contained information on more than one case definition and these sources were used to develop the adjustment coefficient to transform alternative case definitions to the GBD case definition. The adjustment coefficient was the beta value derived from the following model:

$$p_{\text{current-all smokeless},k} = \beta p_{i,k} + \epsilon_k$$

where  $p_{\text{current-all smokeless},k}$  is the prevalence of current smokeless tobacco use reported in survey  $k$  and  $p_{i,k}$  is the prevalence of an alternative case definition  $i$  also reported in survey  $k$ . Models with

adjusted R-squared values > 0.8 were used in order of their R-squared value. We fit the regression using the maximum of either 1) the 200 closest sources to the source to be crosswalked, or 2) all data from the same region as the source to be crosswalked.

For each source that needed adjusting, we assigned space weights based on GBD region and super-region to the sources containing more than one case definition. Data from the same region receiving a full weight of 1, and data from the same super-region received a weight of ½. We explored using a time weight, as we do in the age-sex splitting process, to control for possible changes in the relationship between smokeless tobacco use behaviors over time. We found incorporating temporal information did not significantly change the estimated coefficients but did undercut sample sizes, and chose to exclude the time weight. Crosswalk coefficients generated from fewer than 20 data sources were dropped.

We generated separate crosswalk coefficients for the 10-14 age group and the 15-19 age group, as we found the relationships between case definitions differed strongly in the younger age groups compared to the 20+ age groups. To account for this, we attempted to generate a global crosswalk coefficient for both the 10-14 and 15-19 age groups, using the same regression as above. Due to data limitations, none of the crosswalk coefficients met the criteria outlined above, so no data covering youths under 20 years old were crosswalked. In other words, all data from these age groups that appear in the model were asked according to our case definition in the survey.

The estimated regression coefficients used for adjustment are reported in Table 2.

We propagated uncertainty at the survey (k) level from the crosswalk using the following equation:

$$PE_k = \sigma_\epsilon^2 + X_k^2 \text{var}(\hat{\beta})$$

where  $PE_k$  is the crosswalk prediction error that is added to the sampling variance of the data point,  $\sigma_\epsilon^2$  is the variance of the error,  $X_k^2$  is the squared value of the data being adjusted, and  $\text{var}(\hat{\beta})$  is the variance of the adjustment coefficient.

### Age and sex splitting

We split data reported in broader age groups than the GBD 5-year age groups or as both sexes combined by adapting the method reported in Ng et al.

(<http://jamanetwork.com/journals/jama/fullarticle/1812960>) to split using a sex- geography- time-specific reference age pattern. We separated the data into two sets: a training dataset, with data already falling into GBD sex-specific 5-year age groups, and a split dataset, which reported data in aggregated age or sex groups. Each source reporting aggregated data was temporarily duplicated into correct GBD categorizations covering their form of aggregation. These duplicated age groups were iteratively matched to the closest 200 sources of the same age and sex in the training dataset by geography and time. The mean of these 200 sources was used to generate an estimate for each duplicated estimate. Finally, we multiplied the original aggregated estimate by the population-weighted ratio of the mean estimates generated from the training data.

Similar to the crosswalk, we defined the “closest” sources in space by assigning space weights based on GBD regions. If a training source was from the same country or subnational unit as the source to be split, it received a full space weight of 1. If from a different country but the same region, it received a space weight of .66. If the sources only shared a super-region, it received a space weight of .33. The time weights were generated using the equation: Time weight =  $1 - \text{abs}(\text{year}_{\text{train}} - \text{year}_{\text{split}}) * .05$



Essentially, sources from the training dataset published in the same year as the source to be split would receive a full time weight of 1, with diminishing weight as the difference in publication years increased. The time weight and space weight each made up 50% of a combined total weight. The 200 training sources with the highest total weights were then used to estimate the mean prevalence pattern for each source in need of splitting.

### Smokeless tobacco prevalence modeling

We used ST-GPR to model smokeless tobacco prevalence. Full details on the ST-GPR method are reported in Appendix Section 2. Briefly, the mean function input to GPR is a complete time series of estimates generated from a mixed effects hierarchical linear model plus weighted residuals smoothed across time, space, and age. The linear model formula, fit separately by sex using restricted maximum likelihood in R, is:

$$\text{logit}(p_{g,a,t}) = \beta_0$$

We chose this simple model after finding that all explored covariates and age-specific indicators were inconsistent across geographies, leading to artificial smokeless tobacco trends in certain locations.

We used a space weight of 0.95 in data-dense countries (at least five years covered in a geography-age-sex group) and space weight of 0.7 in data-sparse countries. The other parameters were consistent across data-density levels: age weight = 1, time weight = 1, and scale = 10. Amplitude was calculated at the region level.

### Estimating attributable burden

#### Assessment of risk-outcome pairs

We included outcomes based on the strength of available evidence supporting a causal relationship. Table X reports the strength of evidence for included outcomes.

#### Relative risk

Relative risk estimates were derived from prospective cohort studies and population-based case-control studies. Sources used in relative risk estimation are reported in Table X.

Table X reports relative risk estimates and uncertainty for the two outcomes included in analysis, by sex. We extracted the underlying effect size estimates from prospective cohort studies and population-based case-control studies identified by performing a systematic literature review as well as by reviewing the underlying studies included in published meta-analyses. We did not include hospital-based case control studies due to concerns over representativeness. We only included sources that adequately adjusted for major confounders, especially smoking status. Summary effect size estimates were calculated in R, using the 'metafor' package. We performed a random effects meta-analysis using the DerSimonian and Laird method, which does not assume a true effect size but considers each input study as selected from a random sample of all possible sets of studies for the outcome of interest.<sup>1</sup> The random-effects method allows for more variation between the studies, and incorporates this variance into the estimation process. We used an inverse-variance weighting method to determine component study weights.

We found significantly different relative risks for oral cancer for males and females, and estimated relative risks separately by sex for oral cancer alone. The strength of evidence was only sufficient to attribute risk in countries who predominantly use chewing tobacco. As more evidence becomes available we will continue to re-evaluate risk-outcome pairs and the harm associated with additional smokeless tobacco products.

#### Theoretical minimum risk exposure level

The theoretical minimum risk exposure level is that everyone in the population has been a lifelong non-user of smokeless tobacco products.

## Figures and Tables

Figure 1: PRISMA flowchart

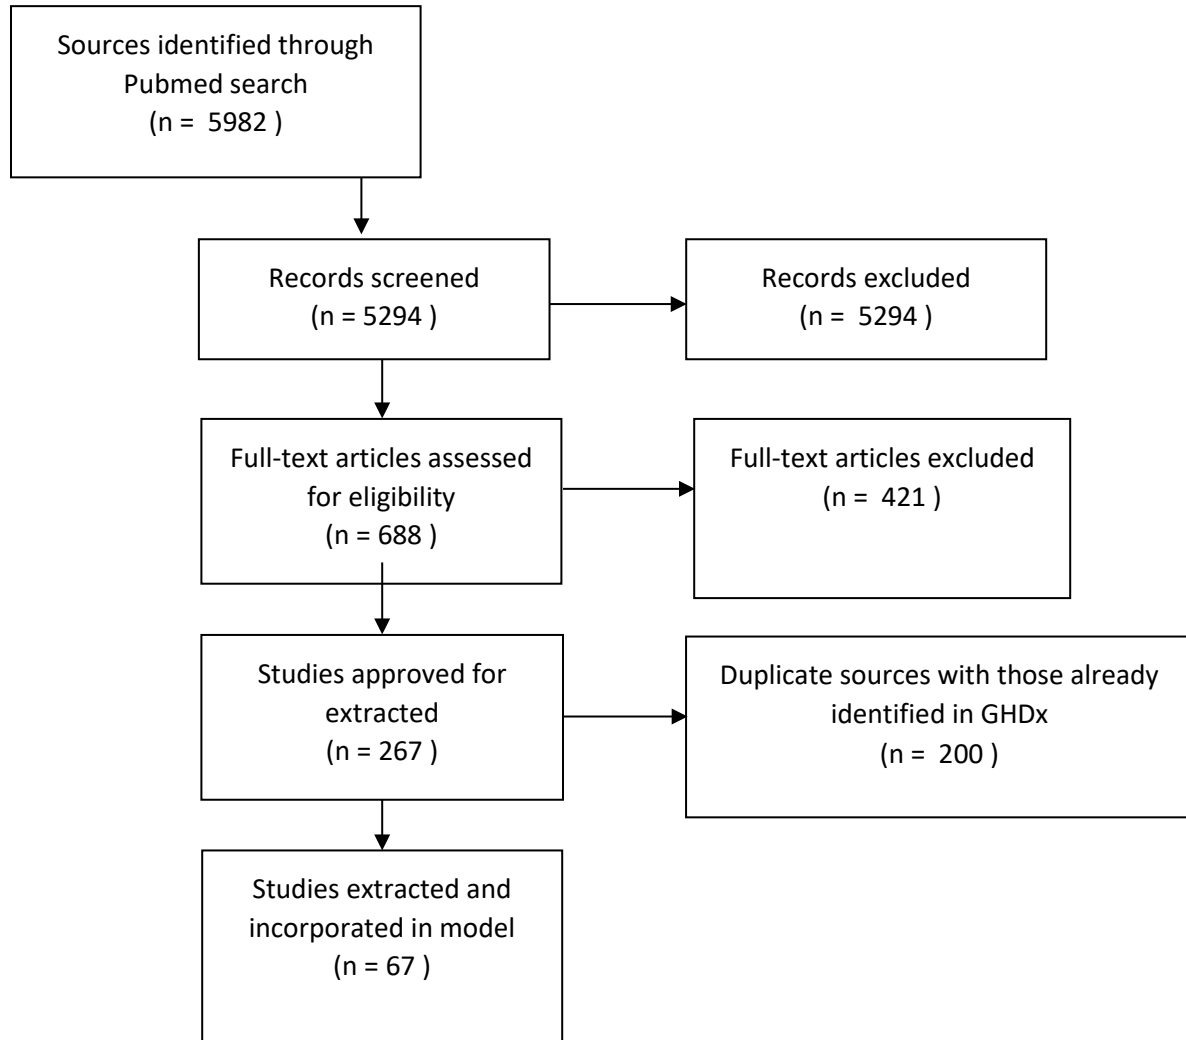

Table 1: Number of datapoints for each smokeless tobacco case definition (working definition in bold)

| Case definition                           | Number of datapoints |
|-------------------------------------------|----------------------|
| <b>Current use of smokeless tobacco</b>   | 34036                |
| Daily use of smokeless tobacco            | 16252                |
| Occasional use of smokeless tobacco       | 15071                |
| Ever user of smokeless tobacco            | 12186                |
| Former-daily use of smokeless tobacco     | 2470                 |
| Ever daily use of smokeless tobacco       | 1463                 |
| Ever non-daily use of smokeless tobacco   | 441                  |
| Former use of smokeless tobacco           | 440                  |
| Former non-daily use of smokeless tobacco | 144                  |

Table 2: Regression coefficients used for crosswalk, by GBD super-region or (when possible) region

| Case definition                     | Super-region                                     | Region                      | Crosswalk Coefficient | R-squared value | Number of sources used in regression |
|-------------------------------------|--------------------------------------------------|-----------------------------|-----------------------|-----------------|--------------------------------------|
| Daily use of smokeless tobacco      | Southeast Asia, East Asia, and Oceania           | East Asia                   | 1.152                 | 0.832           | 351                                  |
| Daily use of smokeless tobacco      | Southeast Asia, East Asia, and Oceania           | Southeast Asia              | 1.106                 | 0.911           | 143                                  |
| Daily use of smokeless tobacco      | High-income                                      |                             | 1.469                 | 0.918           | 11403                                |
| Daily use of smokeless tobacco      | Latin America and Caribbean                      | Tropical Latin America      | 1.002                 | 0.819           | 566                                  |
| Daily use of smokeless tobacco      | North Africa and Middle East                     |                             | 1.074                 | 0.925           | 106                                  |
| Daily use of smokeless tobacco      | South Asia                                       |                             | 1.056                 | 0.985           | 893                                  |
| Daily use of smokeless tobacco      | Sub-Saharan Africa                               | Central Sub-Saharan Africa  | 1.068                 | 0.973           | 365                                  |
| Daily use of smokeless tobacco      | Sub-Saharan Africa                               | Eastern Sub-Saharan Africa  | 1.047                 | 0.987           | 134                                  |
| Daily use of smokeless tobacco      | Sub-Saharan Africa                               | Southern Sub-Saharan Africa | 1.068                 | 0.973           | 365                                  |
| Daily use of smokeless tobacco      | Sub-Saharan Africa                               | Western Sub-Saharan Africa  | 1.15                  | 0.978           | 173                                  |
| Occasional use of smokeless tobacco | Southeast Asia, East Asia, and Oceania           | Oceania                     | 1.274                 | 0.831           | 176                                  |
| Occasional use of smokeless tobacco | Central Europe, Eastern Europe, and Central Asia |                             | 1.534                 | 0.847           | 124                                  |
| Occasional use of smokeless tobacco | High-income                                      |                             | 2.02                  | 0.822           | 11353                                |

|                                     |                             |                             |       |       |     |
|-------------------------------------|-----------------------------|-----------------------------|-------|-------|-----|
| Occasional use of smokeless tobacco | Latin America and Caribbean | Caribbean                   | 1.022 | 0.926 | 326 |
| Ever used smokeless tobacco         | South Asia                  |                             | 0.647 | 0.924 | 208 |
| Ever used smokeless tobacco daily   | South Asia                  |                             | 0.998 | 0.988 | 137 |
| Ever used smokeless tobacco daily   | Sub-Saharan Africa          | Central Sub-Saharan Africa  | 0.949 | 0.962 | 185 |
| Ever used smokeless tobacco daily   | Sub-Saharan Africa          | Eastern Sub-Saharan Africa  | 0.949 | 0.962 | 185 |
| Ever used smokeless tobacco daily   | Sub-Saharan Africa          | Southern Sub-Saharan Africa | 0.949 | 0.962 | 185 |
| Ever used smokeless tobacco daily   | Sub-Saharan Africa          | Western Sub-Saharan Africa  | 0.882 | 0.968 | 104 |

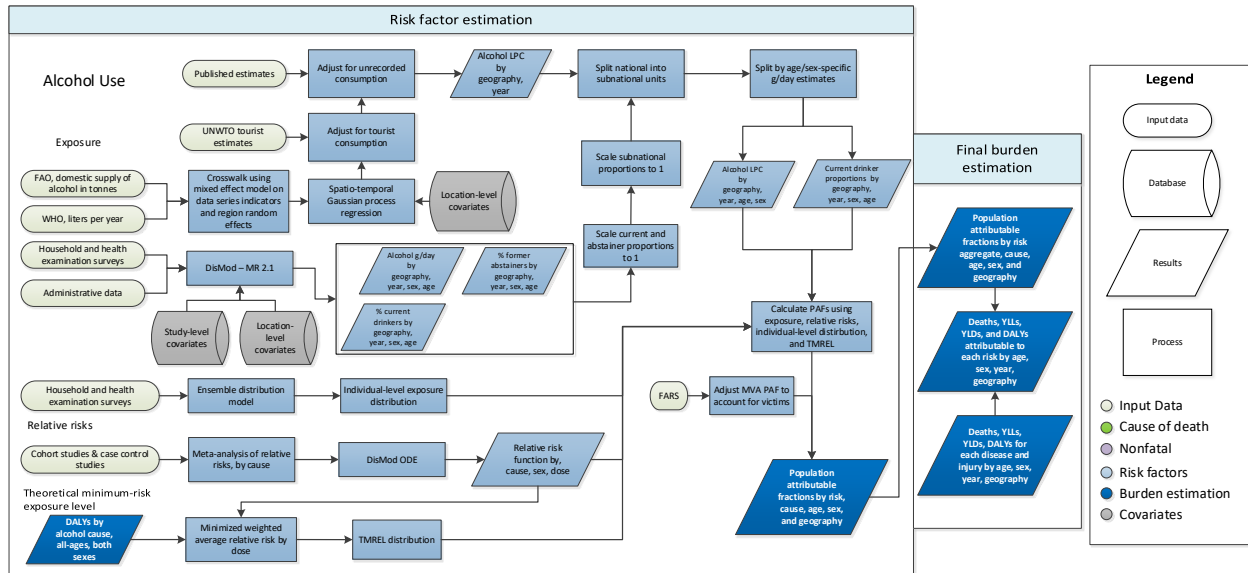

## Exposure

### Definitions

We defined exposure as the grams per day of pure alcohol consumed amongst drinkers. We constructed this exposure using the indicators outlined below:

1. Current drinkers, defined as the proportion of individuals who have consumed at least one alcoholic beverage (or some approximation) in a 12-month period.
2. Lifetime abstainers, defined as the proportion of individuals who have never consumed an alcoholic beverage.
3. Alcohol consumption (in grams per day), defined as grams of alcohol consumed by current drinkers, per day, over a 12-month period.
4. Alcohol liters per capita stock, defined in liters per capita of pure alcohol, over a 12-month period.

We also used three additional indicators to adjust alcohol exposure estimates to account for different types of bias:

1. Number of tourists within a location, defined as the total amount of visitors to a location within a 12 month period.
2. Tourists' duration of stay, defined as the number of days resided in a hosting country.
3. Unrecorded alcohol stock, defined as a percentage of the total alcohol stock produced outside established markets.

## Input data

A systematic review of the literature was performed to extract data on our primary indicators. The Global Health Exchange (GHDx), IHME's online database of health-related data, was searched for population survey data containing participant-level information from which we could formulate the required alcohol use indicators on current drinkers, lifetime abstainers, alcohol consumption, and binge drinkers. Data-sources were included if they captured a sample representative of the geographic location under study. We documented relevant survey variables from each data-source in a spreadsheet and extracted using STATA 13.1 and R 3.3 . A total of 2,821 potential data-sources were available in the GHDx across countries with subnational locations, out of which 191 data-sources (corresponding 88,734 tabulated data-points by location/year/sex/age) were included across the four indicators mentioned above.

To generate estimates of alcohol consumption in liters per capita (LPC), we obtained data from FAOSTAT, and WHO GISAH database [1-2]. To provide more stable time trends in the model, we transformed FAO sales data (which calculates stock based on primary inputs) to a lagged five-year average. Given WHO uses FAO data in locations where WHO could not find data using their own methods, we removed FAO data in the locations where WHO used FAO data in place of their own. To correct for bias in the underlying data sources, we adjusted the input data (crosswalked), by running a mixed effect model on the log average of the data with dummy variables for the data series, as well as random effects on super region, region, country, and time. We adjusted the data points using the following equation:

$$\text{Log Average Data} = D + (\text{Super Region} | D, \text{Region} | D, \text{Country} | D, \text{Year} | D)$$

$$\text{Transformed data} = \text{data} * e^{\widehat{\beta}_1 + \widehat{\beta}_3}$$

where:

*D is a dummy variable for a data source*

None of the data sources on liters per capita provided estimates of uncertainty, which is a component required for our eventual modeling strategy. To generate uncertainty, we ran a Loess model on the adjusted data points and the standard deviation between the difference of the Loess smoothed model and the adjusted data points across a five-year span was used as the standard deviation of the data. (i.e., if the total stock changes more variably in a narrow time frame, we believe the data to be more uncertain).

We obtained data on the number of tourists and their duration of stay from the UNWTO [4]. We applied a crosswalk across different tourist categories, similar to the one used for the liters per capita data, to arrive at a consistent definition (i.e. visitors to a country).

We obtained estimates on unrecorded alcohol stock from six published papers [4-9], consisting of 166 locations.

## Modeling Strategy

While population-based surveys provide accurate estimates of the prevalence of lifetime abstainers and current drinkers, they typically underestimate real alcohol consumption levels [10-12]. As a result, we considered the liter per capita input to be a better estimate of overall volume of consumption. Per capita consumption, however, does not provide age- and sex-specific consumption estimates needed to compute alcohol-attributable burden of disease. Therefore, we use the age-sex pattern of consumption among drinkers modeled from the population survey data and the overall volume of consumption from FAO and GISAH to determine the total amount of alcohol consumed within a location. In the paragraphs we outline how we estimated each primary input in the alcohol exposure model, as well as how we combined these inputs to arrive at our final estimate of grams per day of pure alcohol. We estimated all models below using 1000 draws.

For data obtained through surveys, we used DisMod-MR 2.1 to construct estimates for each country/year/age/sex. We chose to use DisMod due to its ability to leverage information across the heterogeneous age groups reported in the surveys, through age-integration, as well as the model's ability to leverage information available from data in nearby locations or time-periods [13].

We modeled the alcohol liters per capita data, as well as the total number of tourists, using a spatio-temporal Gaussian process regression (ST-GPR). We chose parameters, as well as our final model, using out-of-sample 10-fold cross validation.

Given the heterogeneous nature of the estimates on unrecorded consumption, as well as the wide variation across countries and time-periods, we took 1000 draws from the uniform distribution of the lowest and highest estimates available for a given country. We did this to incorporate the diffuse uncertainty within the unrecorded estimates reported. We used these 1000 draws in the above equation. We adjusted LPC only for countries where estimates were available.

We adjusted the alcohol LPC for unrecorded consumption using the following equation:

$$\text{Alcohol LPC} = \frac{\text{Alcohol LPC}}{(1 - \% \text{ Unrecorded})}$$

We then adjusted the estimates for alcohol LPC for tourist consumption by adding in the per capita rate of consumption abroad and subtracting the per capita rate of tourist consumption domestically.

$$\text{Alcohol LPC}_d = \text{Unadjusted Alcohol LPC}_d + \text{Alcohol LPC}_{\text{Domestic consumption abroad}} - \text{Alcohol LPC}_{\text{Tourist consumption domestically}}$$

$$\text{Alcohol LPC}_i = \frac{\sum_l \text{Tourist Population}_l * \text{Proportion of tourists}_{i,l} * \text{Unadjusted Alcohol LPC}_l * \frac{\text{Average length of stay}_{i,l}}{365}}{\text{Population}_d}$$

where:

$l$  is the set of all locations,  $i$  is either Domestic consumption abroad or Tourist consumption domestically, and  $d$  is a domestic location



After adjusting alcohol LPC by tourist consumption and unrecorded consumption for all location/years reported, sex-specific and age-specific estimates were generated by incorporating estimates modeled in DisMod for percentage of current drinkers within a location/year/sex/age, as well as consumption trends modeled in the DisMod g/day model. We do this by first making sure the sum of percent current drinkers and percent abstainers sum to one for a given location/year/age/sex. We then calculate the proportion of total consumption for a given location/year by age and sex, using the estimates of alcohol consumed per day, the population size, and the percentage of current drinkers. Lastly, we then multiply this proportion of total stock for a given location/year/sex/age by the total stock for a given location/year to calculate the consumption in terms of liter per capita for a given location/year/sex/age. We then convert these estimates to be in terms of grams/per day. The following equations describe these calculations:

$$\% \text{ Current drinkers}_{l,y,s,a} = \frac{\% \text{ Current drinkers}_{l,y,s,a}}{\% \text{ Current drinkers}_{l,y,s,a} + \% \text{ Abstainers}_{l,y,s,a}}$$

$$\begin{aligned} \text{Proportion of total consumption}_{l,y,s,a} \\ = \frac{\text{Alcohol g/day}_{l,y,s,a} * \text{Population}_{l,y,s,a} * \% \text{ Current drinkers}_{l,y,s,a}}{\sum_{s,a} \text{Alcohol g/day}_{l,y,s,a} * \text{Population}_{l,y,s,a} * \% \text{ Current drinkers}_{l,y,s,a}} \end{aligned}$$

$$\text{Alcohol LPC}_{l,y,s,a} = \frac{\text{Alcohol LPC}_{l,y} * \text{Population}_{l,y} * \text{Proportion of total consumption}_{l,y,s,a}}{\% \text{ Current drinkers}_{l,y,s,a} * \text{Population}_{l,y,s,a}}$$

$$\text{Alcohol g/day}_{l,y,s,a} = \text{Alcohol LPC}_{l,y,s,a} * \frac{1000}{365}$$

where:

*l is a location, y is a year, s is a sex, and a is an age group.*

We then used the gamma distribution to estimate individual level variation within location, year, sex, age drinking populations, following the recommendations of other published alcohol studies [7-8]. We chose parameters of the gamma distribution based on the mean and standard deviation of the 1000 draws of alcohol g/day exposure for a given population.

### **Theoretical minimum-risk exposure level**

We calculated TMREL by first calculating the overall risk attributable to alcohol. We did this by weighting each relative risk curve by the share of overall DALYs for a given cause. We then took the minimum of this overall-risk curve as the TMREL of alcohol-use. More formally,

$$TMREL = \text{argmin average overall risk}_{\omega}(\text{g/day})$$

$$\text{Average overall risk}_{\omega}(g/day) = \sum_i^{\omega} RR_i(g/day) * \frac{DALY_i}{\sum_i^{\omega} DALY_i}$$

Where:

$\omega$  is the set of causes associated with alcohol,  $i$  is a given cause from that set,  $DALY$  is the global  $DALY$  rate in 2010, and  $RR$  is the dose response curve for a given cause and exposure level in grams per day.

In other words, we chose TMREL as being the exposure that minimizes your risk of suffering burden from any given cause related to alcohol. We weight the risk for a particular cause in our aggregation by the proportion of  $DALY$ s due to that cause. (e.g. since more observed people die from IHD, we weight the risk for IHD more in the above calculation of average risk compared to, say, diabetes, even if both have the same relative risk for a given level of consumption)

## Relative risks

For GBD2016, we performed a systematic literature review of all cohort and case-control studies reporting a relative risk, hazard ratio, or odds ratio for any risk-outcome pairs studied in GBD 2016. Studies were included if they reported a categorical or continuous dose for alcohol consumption, as well as uncertainty measures for their outcomes, and the population under study was representative. Relative risk estimates by dose can be found in [Table XX](#).

We then used these studies to calculate a dose-response, modeled using DisMod ODE. We chose DisMod ODE rather than a conventional mixed effect meta-regression because of its ability to estimate nonparametric splines over doses (i.e. for most alcohol causes, there is a non-linear relationship with different doses) and incorporate heterogeneous doses through dose-integration (i.e. most studies report doses categorically in wide ranges. DisMod ODE estimates specific doses when categories overlap across studies, through an integration step.) We used the results of the meta-regression to estimate a non-parametric curve for all doses between 0-150 g/day and their corresponding relative risks. For all causes, we assumed the relative risk was the same for all-ages and sexes, with the exception of ischemic heart disease, ischemic stroke, hemorrhagic stroke, and diabetes, which we estimated by sex.

Regarding injuries outcomes, we constructed relative risks based on chronic exposure rather than acute, which has a weaker relationship to the outcome, though still significant [15-16, 18-21]. We decided to use chronic exposure given the lack of available data on acute exposure, as well as, the lack of cohort studies using acute exposure as a metric. Further, using chronic exposure allowed us to construct relative risks curves for unintentional injuries, interpersonal violence, motor vehicle accidents, and self-harm using the same method as reported above.

In the case of motor vehicle accidents, we adjusted the PAF to account for victims of drunk drivers that are involved in accidents. Using data from the Fatality Analysis Reporting System in the US [17], we calculated the average number of fatalities in a car crash involving alcohol, as well as the percentage of those fatalities distributed by age and sex (figures 1 and 2). We aggregated FARS data across the years 1985-2015, given there was little variation in the data temporally and the number of cases in old age groups had too much variance when constructing estimates by year. To adjust PAFs, we multiplied attributable deaths by the average number of fatalities from FARS and redistributed the PAF amongst each population, based on the probability of being a victim to a certain drunk driver by age and sex, based on the FARS data. The following equation describes this process:

$$\text{Adjusted PAF}_i = \frac{\sum_d \text{PAF}_d * \text{DALY}_d * \text{Avg Fatalities}_d * P(i \text{ is a victim})_d}{\text{DALY}_i}$$

where:

$i$  is a population by location, year, age, sex and  
 $d$  is the set of all age and sex exposed groups within that location and year.

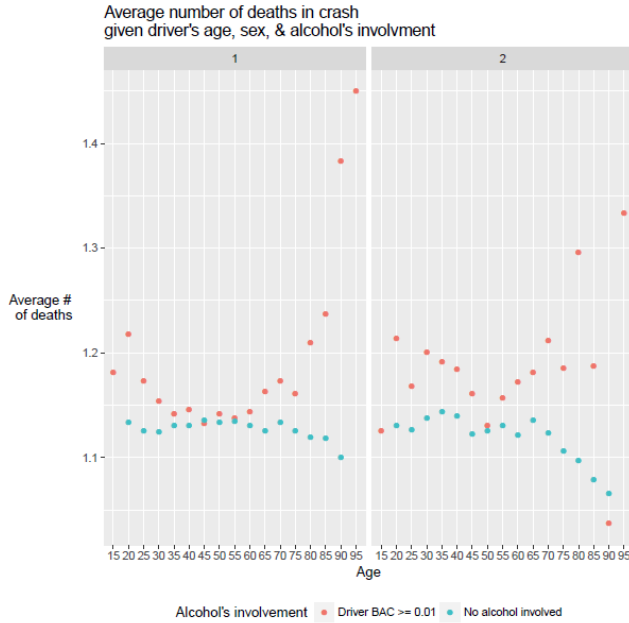

Figure 1

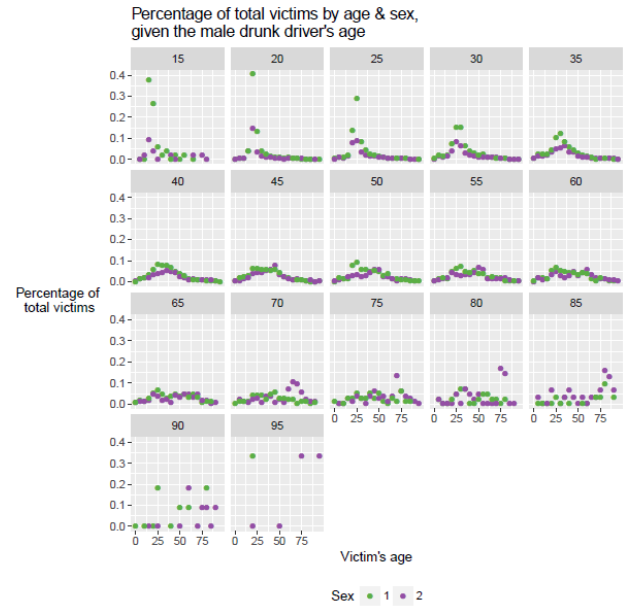

Figure 2

## PAF

For all causes, we defined PAF as:

$$\text{PAF}(x) = \frac{P_A + \int_0^{150} P(x) * RR_C(x) dx - 1}{P_A + \int_0^{150} P(x) * RR_C(x) dx} \quad P(x) = P_C * \Gamma(\mathbf{p})$$

where:

$P_C$  is the prevalence of current drinkers,  $P_A$  is the prevalence of abstainers,  $RR_C(x)$  is the relative risk function for current drinkers, and  $\mathbf{p}$  are parameters determined by the mean and sd of exposure

We performed the above equation for 1000 draws of the exposure and relative risk models. We then used the estimated PAF draws to calculate YLL, YLDs, and DALYs, as per the other risk factors.

## References

1. Food and Agriculture Organization of the United Nations (FAO). FAOSTAT Food Balance Sheets, October 2014. Rome, Italy: Food and Agriculture Organization of the United Nations (FAO).
2. World Health Organization (WHO). WHO Global Health Observatory - Recorded adult per capita alcohol consumption, Total per country. Geneva, Switzerland: World Health Organization (WHO).
3. UN World Tourism Organization (UNWTO). UN World Tourism Organization Compendium of Tourism Statistics 2015 [Electronic]. Madrid, Spain: UN World Tourism Organization (UNWTO), 2016.
4. Norstrom, Thor. "Estimating changes in unrecorded alcohol consumption in Norway using indicators of harm." *Addiction* 93.10 (1998): 1531-1538.
5. Macdonald, Scott. "Unrecorded alcohol consumption in Ontario, Canada: estimation procedures and research implications." *Drug and Alcohol Review* 18.1 (1999): 21-29.
6. Meier, Petra Sylvia, et al. "Adjusting for unrecorded consumption in survey and per capita sales data: quantification of impact on gender-and age-specific alcohol-attributable fractions for oral and pharyngeal cancers in Great Britain." *Alcohol and Alcoholism* 48.2 (2013): 241-249.
7. Hao, Wei, Hanhui Chen, and Zhonghua Su. "China: alcohol today." *Addiction* 100.6 (2005): 737-741.
8. Rehm, Jürgen, and Vladimir Poznyak. "On monitoring unrecorded alcohol consumption." *Alcoholism and Drug Addiction* 28.2 (2015): 79-89.
9. Probst et al. "Unrecorded Alcohol Use: A global modeling study based on Delphi assessments and survey data". Toronto, Canada: CAMH.
10. Ramstedt, Mats. "How much alcohol do you buy? A comparison of self-reported alcohol purchases with actual sales." *Addiction* 105.4 (2010): 649-654.
11. Stockwell, Tim, et al. "Under-reporting of alcohol consumption in household surveys: a comparison of quantity–frequency, graduated–frequency and recent recall." *Addiction* 99.8 (2004): 1024-1033.
12. Kerr, William C., and Thomas K. Greenfield. "Distribution of alcohol consumption and expenditures and the impact of improved measurement on coverage of alcohol sales in the 2000 National Alcohol Survey." *Alcoholism: Clinical and Experimental Research* 31.10 (2007): 1714-1722.
13. An Integrative Metaregression Framework for Descriptive Epidemiology. Abraham D. Flaxman, Theo Vos, Christopher J. L. Murray. Seattle: University of Washington Press, [2015]
14. Taylor, Bruce, et al. "The more you drink, the harder you fall: a systematic review and meta-analysis of how acute alcohol consumption and injury or collision risk increase together." *Drug and alcohol dependence* 110.1 (2010): 108-116.
15. Vinson, Daniel C., Guilherme Borges, and Cheryl J. Cherpitel. "The risk of intentional injury with acute and chronic alcohol exposures: a case-control and case-crossover study." *Journal of studies on alcohol* 64.3 (2003): 350-357.
16. Vinson, Daniel C., et al. "A population-based case-crossover and case-control study of alcohol and the risk of injury." *Journal of studies on alcohol* 64.3 (2003): 358-366.
17. Fatal Accident Reporting System (FARS). National Highway Traffic Safety Administration, National Center for Statistics and Analysis Data Reporting and Information Division (NVS-424); 1985, 1990, 1995, 2000, 2005, 2010, 2015

18. Chen, Li-Hui, Susan P. Baker, and Guohua Li. "Drinking history and risk of fatal injury: comparison among specific injury causes." *Accident Analysis & Prevention* 37.2 (2005): 245-251.
19. Bell, Nicole S., et al. "Self-reported risk-taking behaviors and hospitalization for motor vehicle injury among active duty army personnel." *American journal of preventive medicine* 18.3 (2000): 85-95.
20. Margolis, Karen L., et al. "Risk factors for motor vehicle crashes in older women." *The Journals of Gerontology Series A: Biological Sciences and Medical Sciences* 57.3 (2002): M186-M191.
21. Sorock, Gary S., et al. "Alcohol-drinking history and fatal injury in older adults." *Alcohol* 40.3 (2006): 193-199.

# Injecting Drug Use Capstone Appendix

## Flowchart

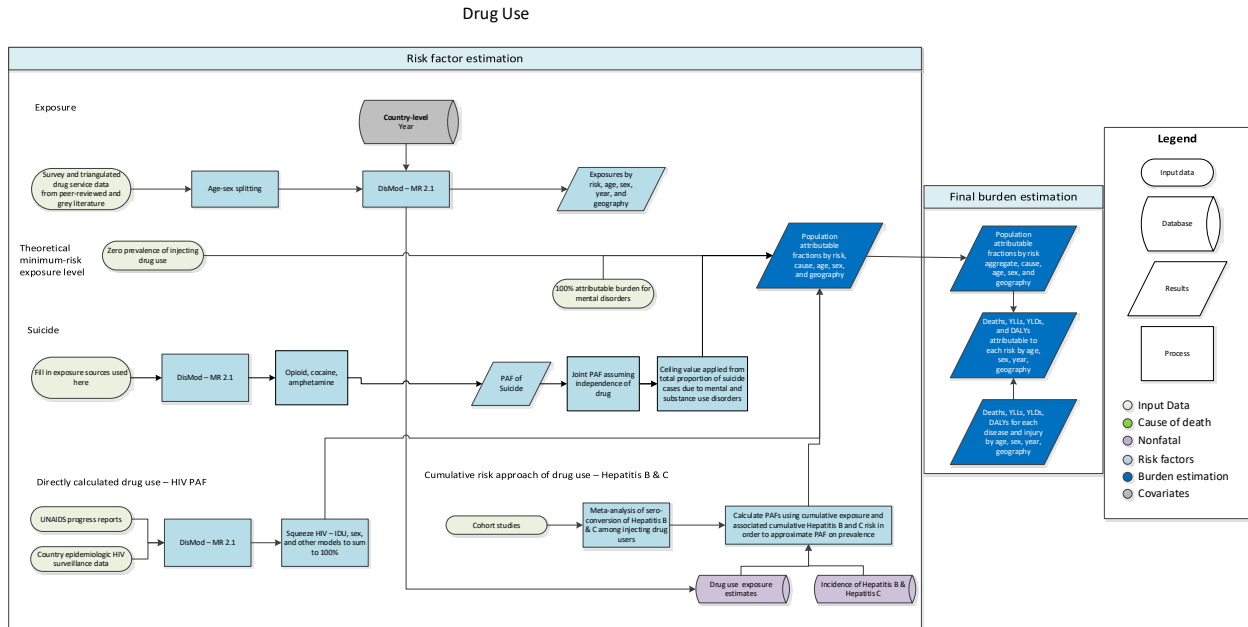

## Input Data & Methodological Summary

### Exposure

#### Case definition

Injecting drug users (IDU) are at high risk from blood-borne infections, including human immunodeficiency virus (HIV) and Hepatitis B and C viruses (HBV and HCV, respectively), through the use of shared needles and injection equipment. In GBD 2010, based on the available epidemiological literature and the availability of exposure estimates<sup>2,3</sup> we measure the burden of disease attributable to HIV, HBV and HCV due to injecting drug use. An injecting drug user was defined as a current or recent user aged 15-64 years old.

#### Input data

The major burden of mortality from viral hepatitis is due to cirrhosis and liver cancer resulting from chronic hepatitis infection. Cirrhosis mortality was modelled with vital registration data using CODEm. Etiologic proportion models, estimated using DisMod-MR 2.1, were used to split the overarching cirrhosis mortality estimates into cases of cirrhosis attributable to hepatitis B, hepatitis C, alcohol, and other causes.(1-4)

Liver cancer mortality was modelled using cancer registry data. The incidence numbers were transformed into mortality estimates using mortality to incidence ratios. The mortality estimates from cancer registries were then combined with vital registration system data as input data into CODEm, which produced the final mortality estimates for liver cancer. As with cirrhosis mortality, etiologic

proportions for liver cancer due to hepatitis B, and C, alcohol, and other causes were generated using DisMod-MR 2.1.

To estimate the burden of HIV cases attributable to IDU, we extracted data on the proportion of notified HIV cases by transmission route – sexual intercourse, injecting drug use, commercial sex work and other -- from a number of agencies that conduct surveillance of HIV across the globe.(6-13)

The prevalence of current injecting drug use was estimated using data from a 2008 review conducted by the Reference Group to the UN on HIV and injecting drug use (15), and a new review currently being conducted by international collaborations and experts. The reviews used a multistage process of systematic review adhering to international guidelines. It involved multiple stages of peer and expert review, with searches of the peer-reviewed literature in addition to an extensive review of online grey literature databases in the drug and alcohol and HIV fields. Additional data on the age and sex distribution of injecting drug use were sourced for this modelling exercise.

In order to generate a pooled incidence rate/absolute relative risk for viral hepatitis among people who inject drugs, we conducted a meta-analysis of longitudinal epidemiological studies that reported a hepatitis B (16-20) or hepatitis C (16-31) incidence rate among PWID. We calculated confidence intervals for the incidence rate (where no CI was reported) from a Poisson distribution around the number of cases.

We excluded studies that focused on non-representative subgroups, such as recent injectors or adolescents or because hepatitis incidence is far higher in those groups than for all people who inject drugs (e.g.(32)). We did not vary incidence among active injectors according to the availability of blood borne virus prevention strategies (e.g. NSPs, opioid substitution therapy) because too few studies have examined different levels of incidence according to variable coverage, and we were not able to estimate coverage by country over time. In any case, in most countries, coverage of virus prevention strategies remains very low among people who inject drugs,(33) and would have been negligible in most countries until recent years.

### *Modeling strategy*

As part of the GBD 2016 study, we measured the burden of hepatitis B and hepatitis C (including attributable cirrhosis and liver cancer) and HIV at the country, regional, and global level for each age-sex group for the years 1990 to 2016. For HIV, hepatitis B and hepatitis C, disease-specific natural history models were used to estimate deaths and YLDs, because the three-state model in DisMod-MR 2.01(susceptible, cases, dead) did not capture the complexity of the disease processes.

### *Mortality estimation*

Mortality due to overall acute hepatitis was modelled with vital registration data using the Cause of Death Ensemble Modelling tool (CODEm), an analytical tool that tests the predictive power of hundreds of models to estimate trends in causes of death.(5) Due to poor coverage of cause of death data for each of the acute hepatitis varieties, four natural history models for hepatitis B and C were used to estimate mortality by deriving incidence from measurements of seroprevalence and then multiplying incidence by case fatality to estimate the number of deaths. These four models were then squeezed so as to fit the parent cause of death model.

We estimated HIV mortality using a modified UNAIDS Spectrum model.(2) This is a compartmental HIV progression model estimates age-specific incidence, prevalence and death rates using methods described elsewhere.(2) This modelling approach was adapted according to epidemic type, including concentrated and generalised epidemics. For concentrated epidemics, the Spectrum models were corrected for misclassification of HIV deaths and then calibrated to align with vital registration data. For generalised HIV epidemics, we minimised a loss function to select epidemic curves that were most consistent with the prevalence and all-cause mortality data.(2)

#### *Estimation of Years Lived with Disability*

For non-fatal estimation, we estimated the incidence of hepatitis B and C using seroprevalence data in DisMod-MR 2.1. For both hepatitis B and C, we use data on the seroprevalence of the hepatitis surface antigen (a marker of chronic infection in hepatitis B and a marker of ever-infection in hepatitis C), excess mortality, and remission, to estimate incidence of both hepatitis infections. Incidence of cirrhosis was also estimated in DisMod using cirrhosis hospital data and cause-specific mortality rate (CSMR) data.

Incidence of liver cancer was derived by dividing mortality by the mortality to incidence ratios, which were then used to predict liver cancer survival. Finally, we estimated prevalence as a function of incidence and survival by splitting prevalence into four phases. Each phase had different disability weights, which were used to generate YLDs for that phase.

Finally, incidence of HIV was also estimated using the UNAIDS Spectrum modelling approach described above in the mortality estimation section.

#### *Burden of HIV attributable to injecting drug use*

We then estimated the proportion of HIV cases attributable to three transmission categories (sex, IDU and other) for all country-time periods using DisMod-MR 2.1. The only covariate used in the model was one that added variance to the data points derived from data sources that attributed a portion of HIV cases to “unknown” transmission sources. We scaled the proportions from each of the three transmission models (sex, IDU and other) to ensure that they fit the total HIV transmission envelope by country, year, age and sex.

#### *Burden of hepatitis B and hepatitis C attributable to injecting drug use*

To estimate the relative contribution of IDU to hepatitis B and C disease burden at the country, regional and global level, we used a cohort method. We re-calibrated individuals according to history of injecting drug use, and their accumulated risk of incident hepatitis B and C due to IDU. We made use of data on prevalence of current injecting drug use, pooled in DisMod-MR 2.1; a meta-analysis of incidence rates of hepatitis B and hepatitis C among people who inject drugs; and estimates of population-level incidence of hepatitis B and C between 1990 and 2016. We used back extrapolations to estimate incidence before 1990. These steps are detailed below.

To estimate the lifetime risk of being infected with hepatitis B or C, we undertook a cohort analysis for each country, year, age, and sex category and estimated the probability of an individual having been infected in each preceding year. One of the main inputs to this cohort method was the probability of having injected drugs in a specific age cohort in a given calendar year. For example, for a cohort of 40-year-olds in 2015, the relevant probability in 2005 is the estimated prevalence of injecting drug use among 30-year-olds.



In addition to a global time series of estimated prevalence of injecting drug use, we also used the incidence of hepatitis B or C and the sero-conversion rate of hepatitis B and hepatitis C among people who inject drugs for each age-sex-country-year from 1960 to 2013 by 5-year age groups.

1. Incidence rate of Hepatitis B and C in the general population

We modelled the annual incidence rate of hepatitis B and hepatitis C using sero-prevalence data in DisMod-MR 2.1. We assumed a low remission (mean 0.015 and standard error 0.0075)(14) in the hepatitis B model to reflect the small proportion of cases who spontaneously clear the infection. We assumed zero remission for hepatitis C.

2. Prevalence of ever-injecting drug use

DisMod-MR 2.1 was used to estimate the prevalence of injecting drug use with year as a covariate to estimate the trends over time. DisMod makes an average estimate of the change in drug use over the time period from 1990-2016 and we took draws from a normal distribution of the coefficient to project IDU prevalence backward in time to 1960 from baseline level in 1990.

3. Pooled seroconversion hazard of hepatitis C and hepatitis B among people who ever injected drugs

This pooled sero-conversion hazard for both hepatitis C and hepatitis B was derived from a meta-analysis of longitudinal epidemiologic studies described above in the input data section.

### Theoretical minimum-risk exposure level

The theoretical minimum-risk exposure level is defined as zero exposure to injecting drug use.

### Relative risks

For drug use, there were not substantial changes made to the effect sizes from GBD 2015. We used a pooled absolute risk of Hepatitis C and Hepatitis B among those who have ever used injecting drugs.

In addition to assessing IDU as a risk factor for blood-borne infections, the broader category of mental and substance use disorders is assessed as risk factors for suicide. The suicide burden attributable to mental and substance use disorders is estimated by comparing the current health status with a theoretical-minimum-risk exposure defined as the counterfactual status of the absence of mental and substance use disorders (Ferrari, Norman et al 2014).

### References

1. Fitzmaurice C, Dicker D, Pain A, Hamavid H, Moradi-Lakeh M, MacIntyre MF, et al. The Global Burden of Cancer 2013. *JAMA oncology*. 2015;1(4):505-27.
2. Murray CJ, Ortblad KF, Guinovart C, Lim SS, Wolock TM, Roberts DA, et al. Global, regional, and national incidence and mortality for HIV, tuberculosis, and malaria during 1990-2013: a systematic analysis for the Global Burden of Disease Study 2013. *Lancet*. 2014;384(9947):1005-70.

3. GBD 2013 YLDs Collaborators. Global, regional, and national incidence, prevalence and YLDs for 301 acute and chronic diseases and injuries for 188 countries, 1990-2013: A systematic analysis for the Global Burden of Disease Study 2013. *The Lancet*. 2015;386:743-800.
4. Naghavi M, Wang H, Lozano R, Davis A, Liang X, Zhou M, et al. Global, regional, and national age-sex specific all-cause and cause-specific mortality for 240 causes of death, 1990-2013: a systematic analysis for the Global Burden of Disease Study 2013. *Lancet*. 2015;385(9963):117-71.
5. Foreman KJ, Lozano R, Lopez AD, Murray C. Modeling causes of death: an integrated approach using CODEm. *Population Health Metrics*. 2012;10(1).
6. European Centre for Disease Prevention. HIV/AIDS surveillance in Europe 2014 Solna, Sweden. [http://ecdc.europa.eu/en/publications/surveillance\\_reports/HIV\\_STI\\_and\\_blood\\_borne\\_viruses/Pages/HIV\\_STI\\_and\\_blood\\_borne\\_viruses.aspx](http://ecdc.europa.eu/en/publications/surveillance_reports/HIV_STI_and_blood_borne_viruses/Pages/HIV_STI_and_blood_borne_viruses.aspx); ECDC, 2014.
7. Family Health International, Bureau of AIDS TB and STIs Department of Disease Control. The Asian Epidemic Model (AEM) Projections for HIV/AIDS in Thailand:2005-2025. Bangkok: Family Health International (FHI) and Bureau of AIDS, TB and STIs, Department of Disease Control, Ministry of Public Health, Thailand, 2008.
8. Kirby Institute. 2015 Annual Surveillance Report of HIV, viral hepatitis, STIs. Sydney, New South Wales. <https://kirby.unsw.edu.au/surveillance/2015-annual-surveillance-report-hiv-viral-hepatitis-stis>; Kirby Institute, UNSW Australia, 2015.
9. Kirby Institute. Australian NSP survey national data report 2015. Sydney, New South Wales: Kirby Institute, University of New South Wales, 2015.
10. Country reports for Global AIDS Response Progress Reporting [Internet]. UNAIDS. 2014.
11. UNAIDS. UNAIDS Country reports. Geneva: Joint United Nations Programme on HIV/AIDS. <http://www.unaids.org/en/regionscountries/countries>, 2015.
12. United States Center for Disease Control and Prevention. HIV/AIDS Statistics. Atlanta, Georgia: US CDC. <http://www.cdc.gov/hiv/statistics/index.html>, 2015.
13. Gouws E, White PJ, Stover J, Brown T. Short term estimates of adult HIV incidence by mode of transmission: Kenya and Thailand as examples. *Sex Transm Infect*. 2006;82 Suppl 3:iii51-5.
14. McMahon B. The natural history of chronic hepatitis B virus infection. *Hepatology*. 2009;49(5 Suppl):S45-S55.
15. Mathers BM, Degenhardt L, Phillips B, Wiessing L, Hickman M, Strathdee SA, et al. Global epidemiology of injecting drug use and HIV among people who inject drugs: a systematic review. *Lancet*. 2008;372(9651):1733-45.
16. Jackson JB, Wei L, Liping F, Aramrattana A, Celentano DD, Walshe L, et al. Prevalence and Seroincidence of Hepatitis B and Hepatitis C Infection in High Risk People Who Inject Drugs in China and Thailand. *Hepatitis research and treatment*. 2014;2014.
17. Månsson A-S, Moestrup T, Nordenfelt E, Widell A. Continued transmission of hepatitis B and C viruses, but no transmission of human immunodeficiency virus among intravenous drug users participating in a syringe/needle exchange program. *Scandinavian Journal of Infectious Diseases*. 2000;32(3):253-8.
18. Blomé MA, Björkman P, Flamholc L, Jacobsson H, Molnegren V, Widell A. Minimal transmission of HIV despite persistently high transmission of hepatitis C virus in a Swedish needle exchange program. *Journal of viral hepatitis*. 2011;18(12):831-9.

19. Hagan H, McGough JP, Thiede H, Weiss NS, Hopkins S, Alexander ER. Syringe exchange and risk of infection with hepatitis B and C viruses. *American journal of epidemiology*. 1999;149(3):203-13.
20. Crofts N, Aitken CK. Incidence of bloodborne virus infection and risk behaviours in a cohort of injecting drug users in Victoria in 1990-1995. *Medical Journal of Australia*. 1997;167(1):17-20.
21. Roy K, Goldberg D, Taylor A, Hutchinson S, MacDonald L, Wilson K, et al. A method to detect the incidence of hepatitis C infection among injecting drug users in Glasgow 1993–98. *Journal of Infection*. 2001;43(3):200-5.
22. Abou-Saleh M, Davis P, Rice P, Checinski K, Drummond C, Maxwell D, et al. The effectiveness of behavioural interventions in the primary prevention of hepatitis C amongst injecting drug users: a randomised controlled trial and lessons learned. *Harm reduction journal*. 2008;5(1):1.
23. Turner KM, Hutchinson S, Vickerman P, Hope V, Craine N, Palmateer N, et al. The impact of needle and syringe provision and opiate substitution therapy on the incidence of hepatitis C virus in injecting drug users: pooling of UK evidence. *Addiction*. 2011;106(11):1978-88.
24. Grebely J, Lima VD, Marshall BD, Milloy M, DeBeck K, Montaner J, et al. Declining incidence of hepatitis C virus infection among people who inject drugs in a Canadian setting, 1996-2012. *PloS one*. 2014;9(6):e97726.
25. Foley S, Abou-Saleh MT. Risk behaviors and transmission of hepatitis C in injecting drug users. *Addictive Disorders & Their Treatment*. 2009;8(1):13-21.
26. Craine N, Hickman M, Parry J, Smith J, Walker A, Russell D, et al. Incidence of hepatitis C in drug injectors: the role of homelessness, opiate substitution treatment, equipment sharing, and community size. *Epidemiology and Infection*. 2009;137(09):1255-65.
27. Villano SA, Vlahov D, Nelson KE, Lyles CM, Cohn S, Thomas DL. Incidence and risk factors for hepatitis C among injection drug users in Baltimore, Maryland. *Journal of clinical microbiology*. 1997;35(12):3274-7.
28. Maher L, Jalaludin B, Chant KG, Jayasuriya R, Sladden T, Kaldor JM, et al. Incidence and risk factors for hepatitis C seroconversion in injecting drug users in Australia. *Addiction*. 2006;101(10):1499-508.
29. Lucidarme D, Bruandet A, Ilef D, Harbonnier J, Jacob C, Decoster A, et al. Incidence and risk factors of HCV and HIV infections in a cohort of intravenous drug users in the North and East of France. *Epidemiology and infection*. 2004;132(04):699-708.
30. Partanen A, Malin K, Perälä R, Harju O, Holopainen A, Holmström P, et al. Riski-tutkimus 2000-2003. Pistämällä huumeita käyttävien seurantatutkimus. A-Klinikkasäätiön Raporttisarja nro 52. Helsinki: A-Klinikkasäätiön, 2006.
31. Van Den Berg C, Smit C, Van Brussel G, Coutinho R, Prins M. Full participation in harm reduction programmes is associated with decreased risk for human immunodeficiency virus and hepatitis C virus: evidence from the Amsterdam Cohort Studies among drug users. *Addiction*. 2007;102(9):1454-62.
32. Larney S, Kopinski H, Beckwith CG, Zaller ND, Jarlais DD, Hagan H, et al. Incidence and prevalence of hepatitis C in prisons and other closed settings: results of a systematic review and meta-analysis. *Hepatology*. 2013;58(4):1215-24.

33. Degenhardt L, Mathers B, Vickerman P, Rhodes T, Latkin C, Hickman M. Prevention of HIV infection for people who inject drugs: Why individual, structural, and combination approaches are needed. *The Lancet*. 2010;376:285-301.

# Dietary Risks Capstone Appendix

## Flowchart

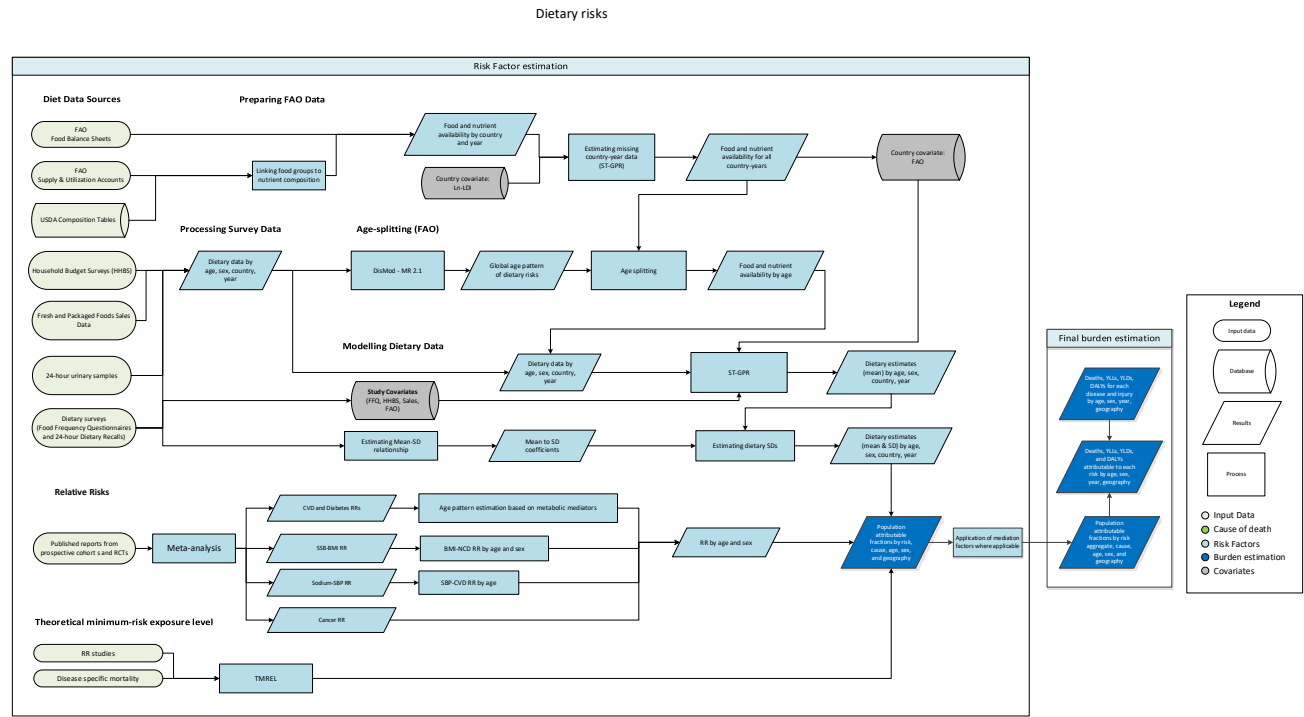

## Input data & Methodological summary

### Exposure

#### Case definition

For GBD 2016, risk factors associated with diet include: diet low in fruits, vegetables, legumes, whole grains, nuts and seeds, fiber, seafood omega-3 fatty acids, polyunsaturated fatty acids, calcium, milk; and diet high in red meat, processed meat, sugar sweetened beverages, trans fatty acids, and sodium. Exposure to a diet low in fruits is defined as average daily consumption of less than 250 grams per day of fruits (fresh, frozen, cooked, canned, or dried, excluding fruit juices and salted or pickled fruits). Exposure to diet low in vegetables is defined as average daily consumption of less than 360 grams per day of vegetables (fresh, frozen, cooked, canned or dried vegetables excluding legumes and salted or pickled vegetables, juices, nuts and seeds, and starchy vegetables such as potatoes or corn). Exposure to a diet low in legumes is defined as average daily consumption of less than 60 grams per day of legumes. Exposure to diet low in whole grains is defined as average daily consumption of less than 125 grams per day of whole grains (bran, germ, and endosperm in their natural proportion) from breakfast cereals, bread, rice, pasta, biscuits, muffins, tortillas, pancakes and other sources. Exposure to diet low in nuts and seeds is defined as average daily consumption of less than 20.5 grams per day of nuts and seeds. Exposure to diet low in milk is defined as average daily consumption of less than 435 grams per day of milk including non-fat, low-fat, and full-fat milk, excluding soy milk and other plant derivatives. Exposure to diet low in calcium is defined as average daily consumption of less than 1.15 grams per day of calcium from all sources, including milk, yogurt, and cheese. Exposure to diet low in fiber is defined as average daily consumption of less than 23.5 grams per day of fiber from all sources including fruits, vegetables,

grains, legumes and pulses. Exposure to diet low in seafood omega-3 fatty acids is defined as average daily consumption of less than 250 milligrams per day of eicosapentaenoic acid (EPA) and docosahexaenoic acid (DHA). Exposure to diet low in polyunsaturated fatty acids is defined as average daily consumption of less than 11% of total energy intake from polyunsaturated fatty acids as a replacement for high intake of saturated fatty acids (> 7% of total energy intake). Exposure to diet high in red meat is defined as average daily consumption of greater than 22.5 grams per day of red meat (beef, pork, lamb, and goat but excluding poultry, fish, eggs, and all processed meats). Exposure to diet high in processed meat is defined as average daily consumption of greater than 2 grams of meat preserved by smoking, curing, salting, or addition of chemical preservatives. Exposure to diet high in sugar sweetened beverages is defined as average daily consumption of greater than 2.5 grams per day of beverages with  $\geq 50$  kcal per 226.8 gram serving, including carbonated beverages, sodas, energy drinks, fruit drinks, but excluding 100% fruit and vegetable juices. Exposure to diet high in trans fatty acids is defined as average daily consumption of greater than 0.5% of trans fat from all sources, mainly partially hydrogenated vegetable oils and ruminant products. Exposure to diet high in sodium is defined as average 24 hour urinary sodium greater than 3 grams per day.

### *Input data*

We used dietary data from multiple sources including nationally and sub-nationally representative nutrition surveys, household budget surveys, accounts of national sales, and United Nations FAO Food Balance Sheets and Supply and Utilization Accounts. Additionally, for sodium and trans fatty acids, we used data on 24-hour urinary sodium and availability of hydrogenated vegetable oil in packaged foods, respectively. Poly unsaturated and trans fatty acids were modeled as a percent of total dietary energy. We modelled missing country-year data from FAO using a space-time Gaussian process regression and lag-distributed country income as the covariate. For each dietary factor, we estimated the global age pattern of consumption based on nutrition surveys (i.e., 24-hour diet recall) and applied that age pattern to the FAO data. Substantive changes in input data compared to GBD 2015 are as follows: (a) re-extracting data from all nutrition surveys and standardizing the definition of dietary components across sources; (b) incorporating data gathered through a systematic review of literature for each of our dietary risk factors; (c) using sales data for fruit, vegetables, legumes, processed meats, red meats, sugar-sweetened beverages, and milk.

### *Modeling strategy*

We used a spatio-temporal Gaussian process regression (ST-GPR) framework to estimate the intake of each dietary factor by age, sex, country, and year. In GBD 2016, for all dietary factors other than sodium, we considered data from 24-hour diet recall as the gold standard, and cross-walked other methods of assessment to the gold standard method. For sodium, the 24-hour urinary sodium was considered as the gold standard. To estimate the 24-hour urinary sodium based on dietary sodium, we performed a crosswalk adjustment between these two types of data.

Table 1 summarizes the study-level and country-level covariates used in modeling of each dietary factor.

Table 1. Types of data sources (other than 24-hour dietary recall) and covariates used in modeling of each dietary factor.

|  | Data Sources |                  |                  |     | Country level covariate |
|--|--------------|------------------|------------------|-----|-------------------------|
|  | Sales        | FFQ <sup>1</sup> | HBS <sup>2</sup> | FAO |                         |

|                                         |   |   |   |   |                                                                                                                                          |
|-----------------------------------------|---|---|---|---|------------------------------------------------------------------------------------------------------------------------------------------|
| Diet low in fruits                      | ● | ● | ● | ● | Lag-distributed income, total available kilocalories per person per day                                                                  |
| Diet low in vegetables                  | ● | ● | ● | ● | Lag-distributed income, total available kilocalories per person per day                                                                  |
| Diet low in legumes                     | ● | - | ● | ● | Lag-distributed income, total available kilocalories per person per day                                                                  |
| Diet low in whole grains                | - | ● | - | - | Proportion of wheat flour to wheat germ available per person per day                                                                     |
| Diet low in nuts and seeds              | - | - | ● | ● | Lag-distributed income, total available kilocalories per person per day                                                                  |
| Diet low in milk                        | ● | ● | ● | ● | Lag-distributed income, total available kilocalories per person per day                                                                  |
| Diet high in red meat                   | ● | ● | ● | ● | Lag-distributed income, total available kilocalories per person per day                                                                  |
| Diet high in processed meat             | ● | ● | ● | - | National availability of red meat (grams/person/day), National availability of pig meat (% of energy/person/day), Lag-distributed income |
| Diet high in sugar-sweetened beverages  | ● | ● | ● | - | National availability of sugar (grams/person/day), Lag-distributed income, total available kilocalories per person per day               |
| Diet low in fiber                       | - | ● | - | ● | Lag-distributed income, total available kilocalories per person per day                                                                  |
| Diet suboptimal in calcium              | - | ● | - | ● | Lag-distributed income, total available kilocalories per person per day                                                                  |
| Diet low in seafood omega-3 fatty acids | - | - | - | ● | Landlocked nation (Yes/No), Lag-distributed income                                                                                       |
| Diet low in polyunsaturated fatty acids | - | ● | - | ● | Lag-distributed income, total available kilocalories per person per day                                                                  |
| Diet high in trans fatty acids          | ● | ● | - | - | -                                                                                                                                        |
| Diet high in sodium <sup>3</sup>        | - | - | - | - | -                                                                                                                                        |

<sup>1</sup> Food Frequency Questionnaire

<sup>2</sup> Household Budget Survey

<sup>3</sup> For sodium, we used data from the 24-hour urinary sodium and 24-hour dietary recall.

To characterize the distribution of each dietary factor at population level, we use an ensemble approach that separately fit 12 distributions for individual level microdata to specific to each data source's sampled population. The respective goodness of fit of each family was assessed and a weighting scheme was determined to optimize overall fit to the unique distribution of each risk factor. A global mean of the weights for each risk factor's data sources was created. We then determined the standard deviation of each population's consumption through a linear regression that captured the relationship between the standard deviation and mean of intake in nationally representative nutrition surveys using 24-hour diet recalls:

$$\ln(\text{Standard deviation}) = \beta_0 + \beta_1 \times \ln(\text{Mean}_i)$$

Then we applied the coefficients of this regression to the outputs of our ST-GPR model to calculate the standard deviation of intake by age, sex, year, and country. We also quantified the within person variation in consumption of each dietary component and adjusted the standard deviations accordingly.

### Theoretical minimum-risk exposure level

In GBD 2016, to estimate the TMREL for each dietary factor, we first calculated the level of intake associated with the lowest risk of mortality from each disease endpoint based on the studies included in the meta-analyses of the dietary relative risks. Then, we calculated the TMREL as the weighted average of these numbers using the global number of deaths from each of outcome as the weight (Table 2).

**Table 2. Theoretical minimum-risk exposure level for dietary factors in GBD 2015 and GBD 2016.**

| Dietary Factor              | GBD 2016                    | GBD 2015                    |
|-----------------------------|-----------------------------|-----------------------------|
| Fruits                      | 200-300 gr/day              | 200-300 gr/day              |
| Vegetables                  | 290-430 gr/day              | 340-500 gr/day              |
| Legumes                     | 50-70 gr/day                | N/A                         |
| Whole grains                | 100-150 gr/day              | 100-150 gr/day              |
| Nuts                        | 16-25 gr/day                | 16-25 gr/day                |
| Red meats                   | 18-27 gr/day                | 18-27 gr/day                |
| Processed meats             | 0-4 gr/day                  | 0-4 gr/day                  |
| Milk                        | 350-520 gr/day              | 350-520 gr/day              |
| Sugar sweetened beverages   | 0-5 gr/day                  | 0-5 gr/day                  |
| Polyunsaturated fatty acids | 9-13% of total daily energy | 9-13% of total daily energy |
| Seafood omega-3 fatty acids | 200-300 mg/day              | 200-300 mg/day              |
| Trans fatty acids           | 0-1% of total daily energy  | 0-1% of total daily energy  |
| Dietary fiber               | 19-28 gr/day                | 19-28 gr/day                |
| Dietary calcium             | 1.0-1.3 gr/day              | 1-1.3 gr/day                |

### Relative Risk

We obtained the relative risk of each disease endpoint per serving of the dietary components from recent dose-response meta-analyses of prospective observational studies, and where available randomized controlled trials. In GBD 2016, we specifically updated the relative risks for the relationship between a diet low in legumes and ischemic heart disease, which is now being considered distinctly as opposed to being placed within the category of vegetables. Considering the well-established age trend of the relative risks of metabolic risk factors for cardiovascular disease and diabetes, we conducted a literature review to identify the most important metabolic mediators for each dietary factor and used the age trend of the relative risk of that mediator(s) and the disease endpoint to estimate the age-specific relative risk for each dietary factors (Table 3).



**Table 3. Metabolic mediators used to determine the age trend of the effect of dietary factors on cardiometabolic outcomes.**

|                                         | Body Mass Index | Total Serum Cholesterol | Fasting Plasma Glucose | Systolic Blood Pressure |
|-----------------------------------------|-----------------|-------------------------|------------------------|-------------------------|
| Diet low in fruits                      | ●               | ●                       | ●                      | ●                       |
| Diet low in vegetables                  | ●               | ●                       | ●                      | ●                       |
| Diet low in legumes                     | ●               | ●                       | ●                      | ●                       |
| Diet low in whole grains                | ●               | ●                       | ●                      | -                       |
| Diet low in nuts and seeds              | ●               | ●                       | ●                      | ●                       |
| Diet high in red meats                  | ●               | -                       | ●                      | -                       |
| Diet high in processed meats            | ●               | -                       | ●                      | ●                       |
| Diet low in fiber                       | -               | ●                       | -                      | -                       |
| Diet low in seafood omega-3 fatty acids | ●               | -                       | -                      | ●                       |
| Diet low in polyunsaturated fatty acids | -               | ●                       | ●                      | -                       |
| Diet high in trans fatty acids          | ●               | ●                       | -                      | -                       |

## Zinc deficiency Capstone Appendix

### Input data & Methodological summary

#### Exposure

##### *Case definition*

Exposure to zinc deficiency is defined as consumption of less than 2.5 milligrams of zinc per day among children between the ages of 1 and 4 years old.

##### *Input data*

We used dietary data from nationally and sub-nationally representative nutrition surveys and United Nations FAO Supply and Utilization Accounts to estimate the mean intake of zinc at the population level.

##### *Modeling strategy*

For GBD 2016, we first used a spatio-temporal Gaussian process regression (ST-GPR) framework to estimate the mean intake of zinc by age, sex, country, and year. We considered data from 24-hour diet recall as the gold standard, and adjusted data from other sources to the gold standard method. Using the method described in the dietary risks section, we characterized the distribution of zinc intake for children between ages of 1 and 4 years old and estimate the proportion of the children with intake of less than 2.5 milligrams of zinc per day.

##### *Relative Risk*

Relative risks used for zinc deficiency is based on the results of randomized trials that measured the effect of zinc supplementation.

##### *Theoretical minimum-risk exposure level*

The theoretical minimum-risk exposure level for proportion zinc deficient is zero percent deficient.

# Childhood Sexual Abuse

## Flowchart

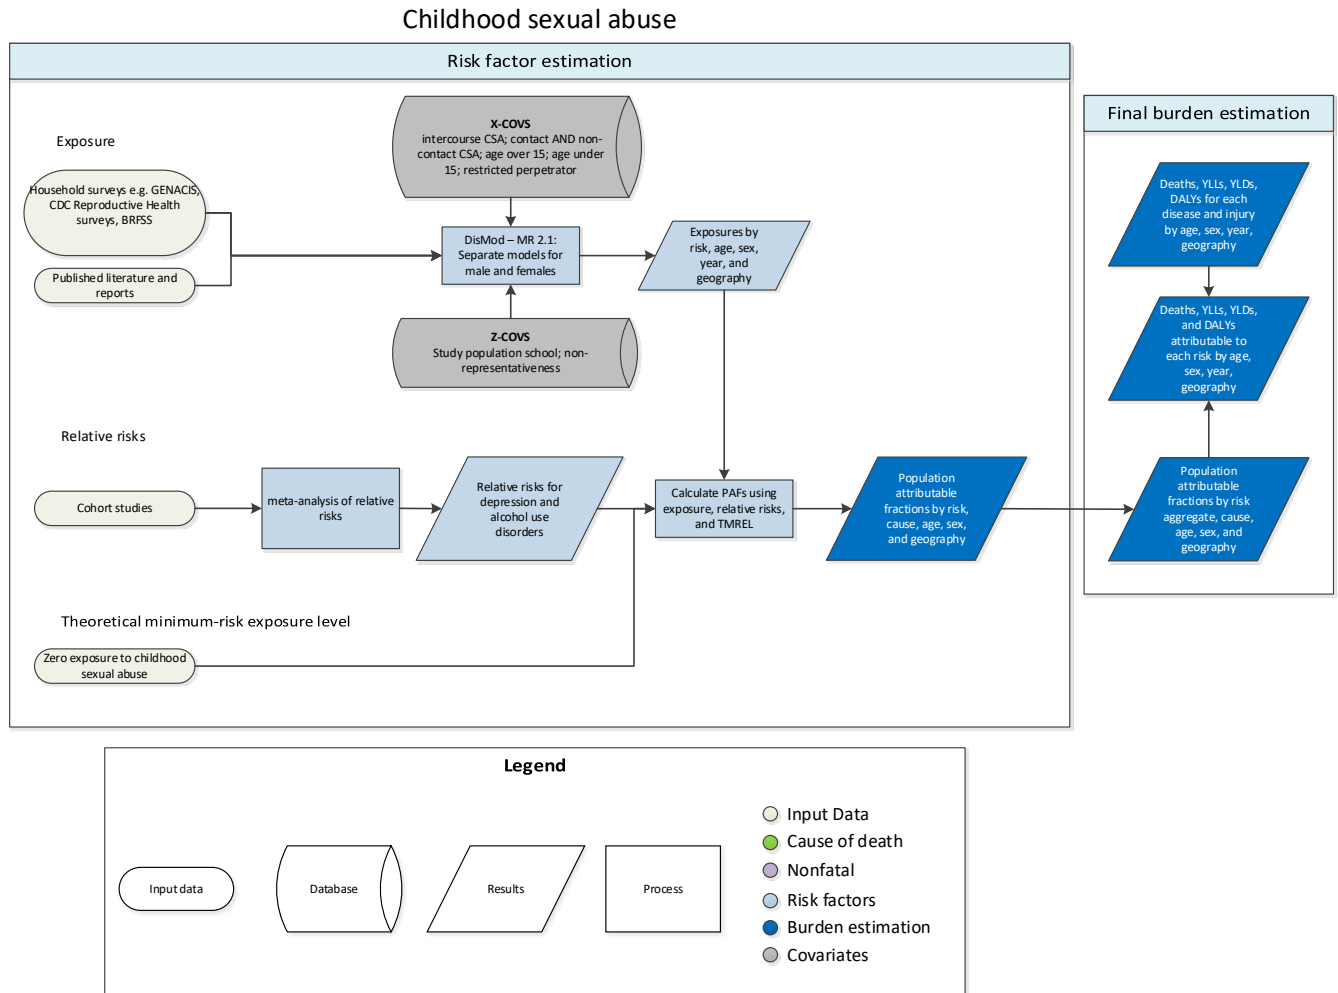

## Input Data & Methodological Summary

### Exposure

#### Case Definition

The case definition for childhood sexual abuse (CSA) is ever having had the experience of intercourse or other contact abuse (i.e. fondling and other sexual touching) when aged 15 years or younger, and the perpetrator or partner was greater than five years older than the victim.

## Input data

Currently, we use self-reported survey data to measure CSA prevalence, not data from Child Protection Services (CPS) or other crime data. The reliability and comprehensiveness of CPS and crime statistics varies too much geographically to warrant including it.

An updated systematic review of CSA prevalence literature was conducted for sources published between August 2015 and January 2017. The following search terms were used:

```
((("health surveys"[MeSH Terms] AND prevalence[Title/Abstract]) OR ("sentinel surveillance"[MeSH Terms] AND prevalence[Title/Abstract]) OR ("prevalence"[Title/Abstract] AND cross sectional studies[MeSH Terms])) AND (("child abuse"[MeSH Terms] OR "child abuse, sexual"[MeSH Terms]) OR ("sex offenses"[MeSH Terms] OR "child abuse, sexual"[MeSH Terms]) OR (child*[Title/Abstract] AND sexual[Title/Abstract] AND abuse[Title/Abstract])) NOT ("comment"[Publication Type] OR "letter"[Publication Type] OR "editorial"[Publication Type]))
```

We supplemented with data from relevant national health surveys and violence-specific surveys. Several survey series used include the United States Behavioral Risk Factor Surveillance System, the CDC Reproductive Health Surveys, Brazil National Alcohol and Drug Survey, and the Gender, Alcohol, and Culture International Study (GENACIS).

A number of study level covariates were also extracted that were used in the modelling process to adjust for heterogeneous definitions across sources. All crosswalks and adjustments were done in DisMod-MR 2.1.

## Modeling strategy

CSA prevalence was modeled as a single parameter prevalence model in DisMod-MR. CSA exposure is modeled separately for males and females because we observe little correlation between the prevalence of child abuse among females and males, and modeling both sexes together causes unreasonable estimates in countries where we only have data for one sex.

Three study-level covariates were used for alternate definitions of the violence.

- Study asked only about intercourse CSA
- Study asked about contact and non-contact CSA
- Study placed restrictions on the relationship between the perpetrator and the victim (e.g. only asked about CSA committed by a father)

We also included study-level fixed effects for varying age thresholds across studies.

- Study asked about recall for events before ages above 15 years (versus reference age threshold of 15)
- Study asked about recall for events before ages less than 15 years (versus reference age threshold of 15)

Two study-level covariate fixed effects on variance (z-cov) were also included in both the male and female models, including an indicator that the survey was not nationally representative, as well as

whether the survey was administered in schools. These study-level covariates were tested as x-covs first, but we did not find coefficients which would indicate systematic bias. We have not included any national-level covariates to date due to lack of knowledge about a covariate (for which we have a time series for all GBD locations) that predicts CSA prevalence.

### Theoretical minimum-risk exposure level

The theoretical minimum risk exposure level is zero exposure to contact childhood sexual abuse.

### Relative risks

We estimate burden attributable to CSA for the following health outcomes: unipolar depressive disorders (major depressive disorder and dysthymia) and alcohol use disorders.

In GBD 2015, we used one twin study that compared adverse outcome risks in same-sex discordant pairs.<sup>1</sup> This study was deemed reliable given that environmental and contextual factors are inherently controlled for when comparing between twins, avoiding potential confounding. However, to add to the strength of the evidence for GBD 2016, we performed a systematic review and a random effects meta-analysis to produce relative risks for depressive disorders and alcohol use disorders. In a departure from GBD 2015, suicide was not used as an outcome for CSA. This decision was based on the evidence available for the relative risk of suicide given exposure to CSA – not enough studies used suicide as an outcome, but instead used attempted suicide.

The pooled relative risk figures and 95% confidence intervals were 1.63 (1.41, 1.89) for depressive disorders and 1.54 (1.19, 1.99) for alcohol use disorders. The resulting forest plots are as follows:

#### CSA and depressive disorders meta-analysis

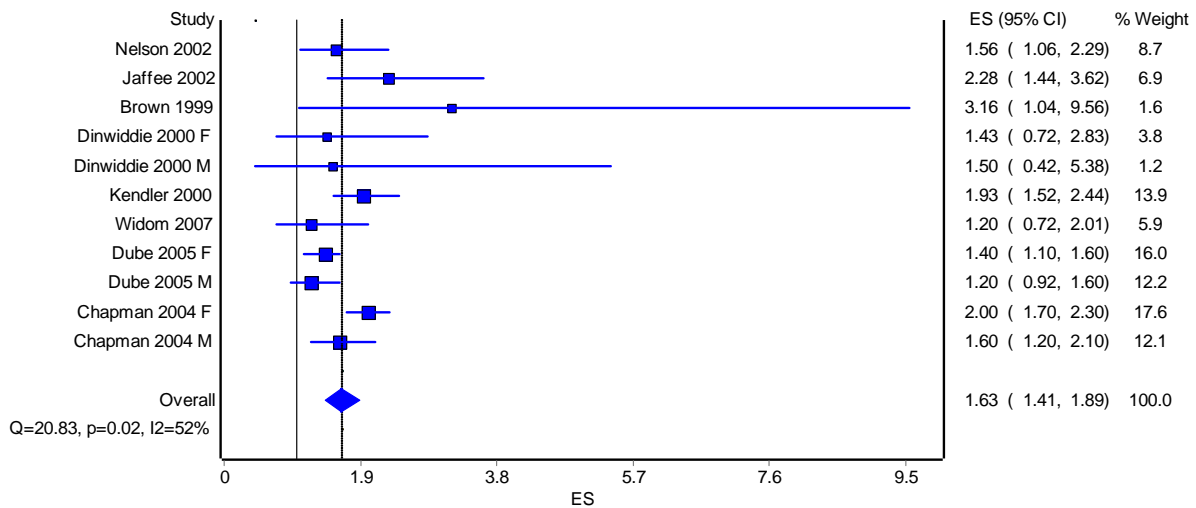

## CSA and alcohol use disorders meta-analysis

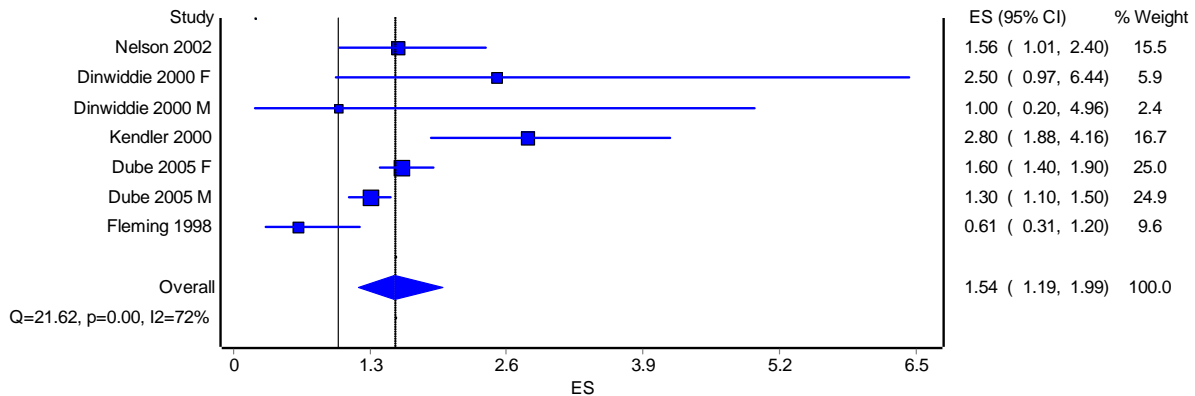

## References

1. Brown J, Cohen P, Johnson JG., and Smailes EM. Childhood abuse and neglect: specificity of effects on adolescent and young adult depression and suicidality. *Journal of the American Academy of Child & Adolescent Psychiatry*. 1999; 38(12): 1490-1496.
2. Chapman DP, Whitfield CL, Felitti VJ, Dube SR, Edwards VJ and Anda RF. Adverse childhood experiences and the risk of depressive disorders in adulthood. *Journal of affective disorders*. 2004; 82(2): 217-225.
3. Cheasty M, Clare AW and Collins C. Relation between sexual abuse in childhood and adult depression: case-control study. *Bmj*. 1998; 316(7126): 198-201.
4. Dinwiddie S, Heath AC, Dunne MP, Bucholz KK, Madden PA, Slutske WS, Bierut LJ, Statham DB, Martin NG. Early sexual abuse and lifetime psychopathology: a co-twin-control study. *Psychol Med*. 2000; 30(1): 41-52.
5. Dube SR, Anda RF, Whitfield CL, Brown DW, Felitti VJ, Dong M and Giles WH. Long-term consequences of childhood sexual abuse by gender of victim. *American journal of preventive medicine*. 2005; 28(5): 430-438.
6. Ernst C, Angst J, Földényi M. The Zurich Study. XVII. Sexual abuse in childhood. Frequency and relevance for adult morbidity data of a longitudinal epidemiological study. *Eur Arch Psychiatry Clin Neurosci*. 1993; 242(5): 293-300.
7. Fleming J, Mullen PE, Sibthorpe B, Attewell R and Bammer G. The relationship between childhood sexual abuse and alcohol abuse in women-a case-control study. *Addiction*. 1998; 93(12): 1787-1798.
8. Jaffee SR, Moffitt TE, Caspi A, Fombonne E, Poulton R, Martin J. Differences in early childhood risk factors for juvenile-onset and adult-onset depression. *Arch Gen Psychiatry*. 2002; 59(3): 215-22.
9. Kendler KS, Bulik CM, Silberg J, Hetttema JM, Myers J, Prescott CA. Childhood sexual abuse and adult psychiatric and substance use disorders in women: an epidemiological and cotwin control analysis. *Arch Gen Psychiatry*. 2000; 57(10): 953-9.
10. Molnar BE, Buka SL and Kessler, RC. Child sexual abuse and subsequent psychopathology: results from the National Comorbidity Survey. *American journal of public health*. 2001; 91(5): 753.
11. Nelson EC, Heath AC, Madden PA, Cooper ML, Dinwiddie SH, Bucholz KK, Glowinski A, McLaughlin T, Dunne MP, Statham DJ, Martin NG. Association between self-reported sexual abuse and adverse psychosocial outcomes: results from a twin study. *Arch Gen Psychiatry*. 2002; 59(2): 139-45.

12. Peleikis DE, Mykletun A and Dahl AA. The relative influence of childhood sexual abuse and other family background risk factors on adult adversities in female outpatients treated for anxiety disorders and depression. *Child Abuse & Neglect*. 2004; 28(1): 61-76.
13. Sartor CE, Lynskey MT, Bucholz KK, McCutcheon VV, Nelson EC, Waldron M, Heath AC. Childhood sexual abuse and the course of alcohol dependence development: findings from a female twin sample. *Drug Alcohol Depend*. 2007; 89(2-3): 139-44.
14. Silverman AB, Reinherz HZ and Giaconia RM. The long-term sequelae of child and adolescent abuse: A longitudinal community study. *Child abuse & neglect*. 1996; 20(8): 709-723.
15. Widom CS, DuMont K and Czaja SJ. A prospective investigation of major depressive disorder and comorbidity in abused and neglected children grown up. *Archives of general psychiatry*. 2007; 64(1): 49-56.

# Unsafe Sex

## Flowchart

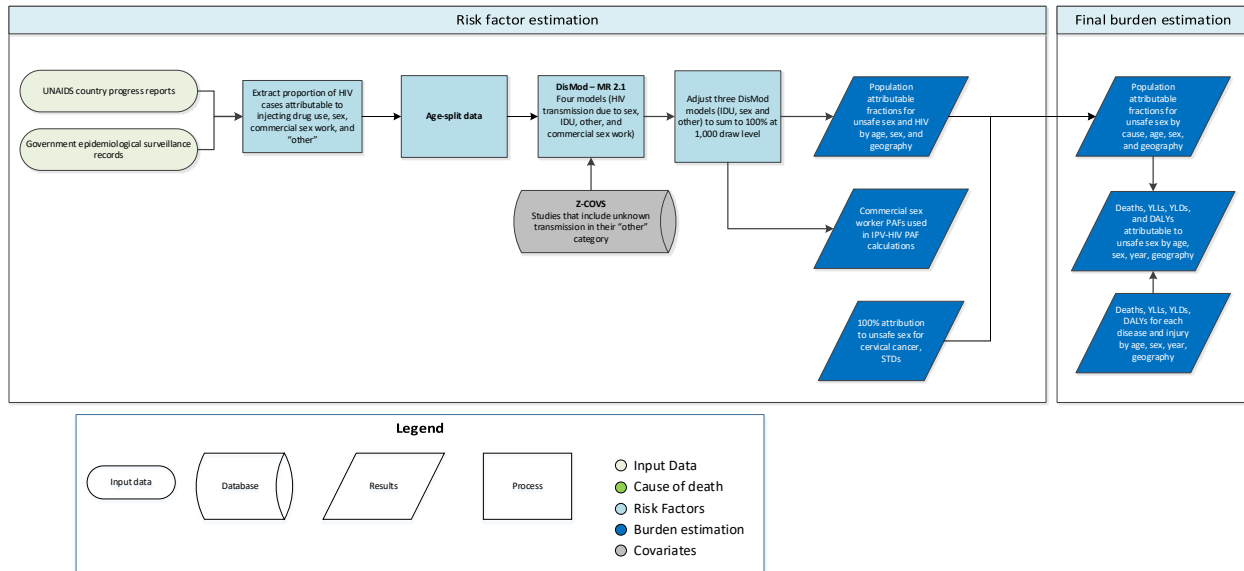

## Input Data & Methodological Summary

### Case definition and summary of GBD approach

Unsafe sex is defined as the risk of disease due to sexual transmission. The outcomes associated with unsafe sex that we estimate for GBD include HIV, cervical cancer, and all sexually transmitted diseases (STDs) except for those in neonates from vertical transmission, including HIV, ophthalmia neonatorum and neonatal syphilis. We assume 100% of cervical cancer and STDs are attributable to unsafe sex and model the proportion of HIV incidence occurring through sexual transmission to estimate the attributable burden for HIV due to unsafe sex.

### Input data

To be used in our models, sources must report HIV cases attributable to various modes of transmission. We screened all UNAIDS country progress reports and searched government epidemiological surveillance records for these data. The primary data sources we used were UNAIDS, the European CDC, and the US CDC.

For GBD 2016, we extracted all new European CDC, UNAIDS, and US CDC reports that had been published since the previous iteration of GBD. We also extracted US state-level HIV surveillance reports where available. These were found through the US CDC: National Center for HIV/AIDS, Viral Hepatitis, STD, and TB Prevention, Division of HIV/AIDS Prevention's website.



We excluded all extractions where the “other” category for HIV transmissions accounted for greater than 25 percent of all cases. We believe that such high proportions raise concerns about the quality of reporting .

### *Modeling strategy*

We model the proportion of HIV cases attributable to unsafe sex. To do this we collect and clean data, run three DisMod models (HIV attributable to sex, HIV attributable to injection drug use, HIV attributable to other routes of transmission), adjust results of the three DisMod models to sum to one, and prepare PAFs.

All of the DisMod models included a study-level covariate fixed effect on integrand variance (z-cov) for sources that include cases of unknown transmission in their “other” category. We assumed that the inclusion of unknown cases in the other category would impact the uncertainty around the point estimates. No country level covariates were included in the models.

A new approach was introduced for GBD 2016 to inform an age-pattern in these HIV transmission models. All-age data points represent the majority of the available data, so we derived an age-pattern for the HIV-IDU transmission model from the age-pattern present in the GBD 2016 population attributable fraction for hepatitis B attributable to intravenous drug use. Assuming the proportion of HIV due to other is constant over time, the age-pattern for the proportion of HIV due to sex was set to be the complement to 1 of the age-pattern for the proportion of HIV due to IDU. The all-age data were split according to these age-patterns, and the three HIV transmission DisMod models were run on the age-split data. Additional priors were set to inform an age-pattern: zero proportion HIV transmission due to IDU before age 15, zero proportion HIV transmission due to sex before age 10, and 100% transmission due to other before age 10. The results from these HIV transmission models were adjusted to sum to 100% for a given country-year-age-sex group at each of 1,000 draws.

### *Squeezed global HIV transmission models by age (females, 2016):*

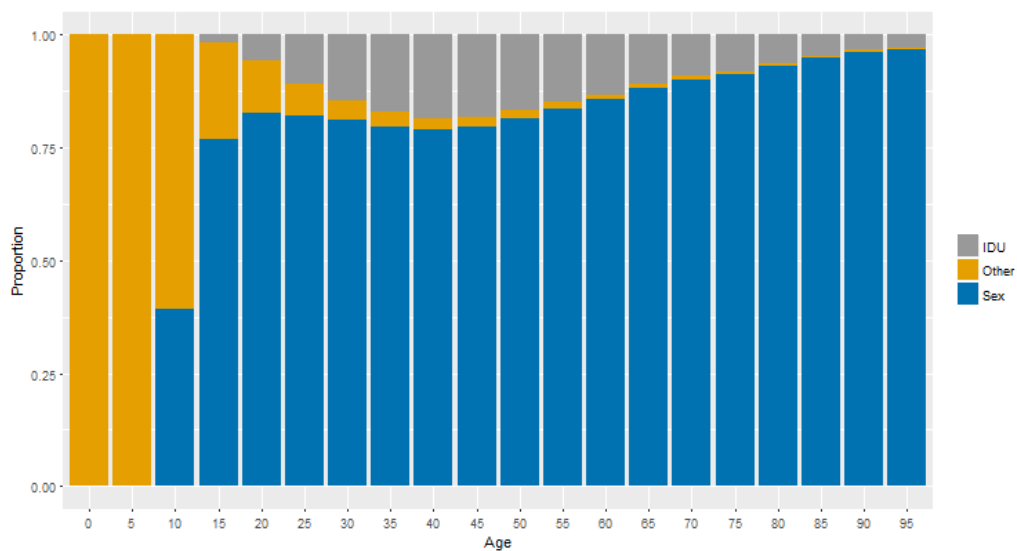

### Theoretical minimum-risk exposure level

The theoretical minimum level used for unsafe sex is the absence of disease transmission due to sexual contact.

### Population attributable fraction calculations

The outcomes associated with unsafe sex that we report on include HIV, cervical cancer, and all sexually transmitted diseases (STDs) except for those in neonates from vertical transmission, including HIV, ophthalmia neonatorum and neonatal syphilis.

Based on evidence in the literature, we attribute 100% of cervical cancer to unsafe sex. These sources state that HPV infection is necessary for cervical cancer to develop and that HPV is only spread through sexual contact. The proportion of STDs attributable to unsafe sex is also 100%.

For HIV, the results from the single parameter proportion DisMod model for HIV transmission due to sex were used directly as the population attributable fraction.

# Low Physical Activity Capstone Appendix

## Flowchart

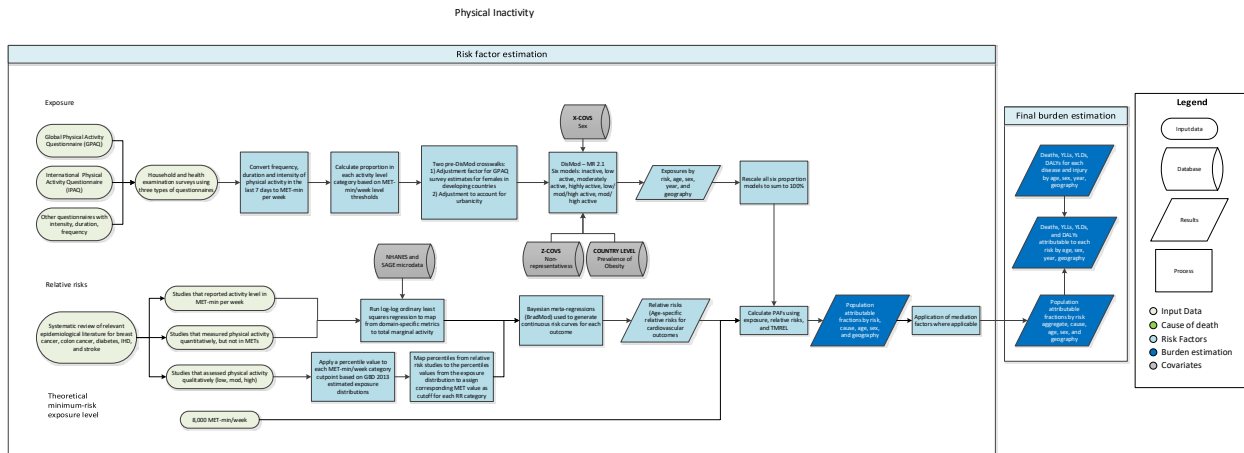

## Input Data and Methodological Summary

### Exposure

#### Case Definition

We measure physical activity performed by adults greater than or equal to 25 years of age, for durations of at least ten minutes at a time, across all domains of life (leisure/recreation, work/household and transport). We used frequency, duration and intensity of activity to calculate total metabolic equivalent-minutes per week. MET (Metabolic Equivalent) is the ratio of the working metabolic rate to the resting metabolic rate. One MET is equivalent to 1 kcal/kg/hour and is equal to the energy cost of sitting quietly. A MET is also defined as the oxygen uptake in ml/kg/min with one MET equal to the oxygen cost of sitting quietly, around 3.5 ml/kg/min.

#### Input data

We included surveys of the general adult population that captured self-reported physical activity in all domains of life (leisure/recreation, work/household and transport), where random sampling was used.

Data were primarily derived from two standardized questionnaires: The Global Physical Activity Questionnaire (GPAQ) and the International Physical Activity Questionnaire (IPAQ), although we included other survey instruments that asked about intensity, frequency and duration of physical activities performed across all activity domains.

Due to a lack of a consistent relationship on the individual level between activity performed in each domain and total activity, we were not able to use studies that included only recreational/leisure activities.

Physical activity level is categorized by total MET-minutes per week using four categories based on rounded values closest to the quartiles of the global distribution of total MET-minutes/week. The lower limit for the Level 1 category (600 MET-min/week) is the recommended minimum amount of physical

activity to get any health benefit. We used four categories with higher thresholds rather than the GPAQ and IPAQ recommended 3 categories to better capture any additional protective effects from higher activity levels.

- Level 0: < 600 MET-min/week (inactive)
- Level 1: 600-3999 MET-min/week (low-active)
- Level 2: 4000-7,999 MET-min/week (moderately-active)
- Level 3: ≤ 8,000 MET-min/week (highly active)

The GHDx was used to locate all surveys that use the GPAQ or IPAQ questionnaire. Although there were many other surveys that focused specifically on leisure activity, we were unable to use these sources because they did not comprise all three domains (work, transport and leisure). In addition, we excluded any surveys that did not report frequency, duration, and intensity of activity.

## Modeling strategy

### *Pre-DisMod crosswalks*

We conducted two crosswalks prior to DisMod to adjust the raw data to our “gold standard” definition. In GBD 2016, our gold standard definition was IPAQ due to concern that GPAQ was not accurately capturing “domestic” (house/yard) activities.

A sex-specific regression was fit on data from nationally representative surveys that used either GPAQ or IPAQ for each activity category, where the dependent variable was the logit of the proportion in the relevant activity level and the main independent variable was an survey instrument (1=GPAQ, 0=IPAQ), with fixed effects for age categories as well as a super-region, region, and country level random effects.

We also adjusted non-nationally-representative urban and rural data points. We constructed an urbanicity covariate that is equal to 1 for urban data points, 0 for rural data points and the proportion urban for the country for nationally representative data points. The dependent variable was the logit of the proportion in the relevant activity level and the main independent variable is urbanicity, with fixed effects for age categories and sex with super region, region and country level random effects.

### *DisMod modeling*

Once the raw data had been adjusted to meet our gold standard definition of physical activity, we modeled activity as a single parameter proportion model in DisMod. We estimated the proportion of each country/year/age/sex subpopulation in each of the above four activity levels using six separate DisMod models. We use six models rather than four to accommodate the different MET-minute/week cutoffs presented in tabulated data sources where individual unit record data was not available. Since the accepted threshold/definition for inactivity is consistently <600 MET-minutes/week, the vast majority of tabulated data was broken down into proportion inactive (model A) and proportion low, moderate or highly active (model B).

|   | Label    | MET-min/week | Name of sequelae in online visualization tool           |
|---|----------|--------------|---------------------------------------------------------|
| A | inactive | <600         | Physical inactivity and low physical activity, inactive |

|   |                              |           |                                                                             |
|---|------------------------------|-----------|-----------------------------------------------------------------------------|
| B | low/moderately/highly active | ≥600      | Physical inactivity and low physical activity, low/moderately/highly active |
| C | low active                   | 600-3999  | Physical inactivity and low physical activity, low active                   |
| D | moderately/highly active     | >4000     | Physical inactivity and low physical activity, moderately/highly active     |
| E | moderately active            | 4000-7999 | Physical inactivity and low physical activity, moderately active            |
| F | highly active                | ≥8,000    | Physical inactivity and low physical activity, highly active                |

These models have mesh points at 0 15 25 35 45 55 65 75 100, and a study-level fixed effect on integrand variance (Z-cov) for whether a study was nationally representative or not, to account for the heterogeneity introduced by studies that are not generalizable to the entire population. They also have national level fixed effects on prevalence of obesity.

After DisMod, we rescale these 6 models so that the proportions sum to one. Since we have the most data for models A and B, we rescale the sum of the proportion in each category to be equal to one. Next we rescale the sum of model C and D to be equal to the rescaled value from model B. Then we rescale the sum of models E and F to be equal to the rescaled value from model D. After these three rescales we are left with a proportion for each of the four categories that all sum to 1.

For the first time, we have directly estimated total MET-minutes per week globally through the use of a regression that estimated the relationship between total MET-mins/week and each of the categorical prevalences of physical activity. The resultant coefficients were then applied to country-year-age-sex specific estimates of categorical prevalence of physical activity. It takes the form:

$$\begin{aligned} \log(\text{Total MET} - \text{mins/week})_{c yas} \\ = \beta_{\text{intercept}} + \beta_{\text{inact}} \times \text{Inactivity Prev}_{c yas} + \beta_{\text{lowact}} \times \text{Low Activity Prev}_{c yas} \\ + \beta_{\text{modact}} \times \text{Moderate Activity Prev}_{c yas} + \beta_{\text{highact}} \times \text{High Activity Prev}_{c yas} \end{aligned}$$

Utilizing microdata on total MET-mins per week from individual-level surveys, we characterized the distribution of activity level at the population level. We then used an ensemble approach to distribution fitting, borrowing characteristics from individual distributions to tailor a unique distribution to fit the data using a weighting scheme. We characterized the standard deviation of each population's activity through a linear regression that captured the relationship between standard deviation and mean activity levels in nationally representative IPAQ surveys:

$$\ln(\text{Standard deviation}) = \beta_0 + \beta_1 \times \ln(\text{Mean}_i)$$

We then applied the coefficients of this regression to the outputs of our estimate of total MET-minutes per week regression outputs to calculate the standard deviation by country, year, age, and sex.

### Theoretical minimum-risk exposure level

The theoretical minimum-risk exposure level for physical inactivity is 3000-4500 MET-min per week, which was calculated as the exposure at which minimal deaths across outcomes occurred.<sup>4</sup>

## Relative risks

We used a recently published dose-response meta-analysis of prospective cohort studies to estimate the effect size of the change in physical activity level on breast cancer, colon cancer, diabetes, ischemic heart disease and ischemic stroke.<sup>4</sup>

## References

1. Ainsworth BE, Haskell WL, Whitt MC, Irwin ML, Swartz AM, Strath SJ, O'Brien WL, Bassett DR, Smitz KH, Emplaincourt PO, Jacobs DR. Compendium of physical activities: an update of activity codes and MET intensities. *Medicine and science in sports and exercise*. 2000 Sep 1;32(9; SUPP/1):S498-504.
2. IPAQ Research Committee. Guidelines for data processing and analysis of the International Physical Activity Questionnaire (IPAQ)—short and long forms. Retrieved September. 2005;17:2008.
3. World Health Organization. Global Physical Activity Questionnaire (GPAQ) Analysis Guide. 2011. Geneva, Switzerland: WHO Google Scholar. 2013
4. Kyu HH, Bachman VF, Alexander LT, Mumford JE, Afshin A, Estep K, Veerman JL, Delwiche K, Iannarone ML, Moyer ML, Cercy K. Physical activity and risk of breast cancer, colon cancer, diabetes, ischemic heart disease, and ischemic stroke events: systematic review and dose-response meta-analysis for the Global Burden of Disease Study 2013. *bmj*. 2016 Aug 9;354:i3857.

# High Fasting Plasma Glucose Capstone Appendix

## Flowchart

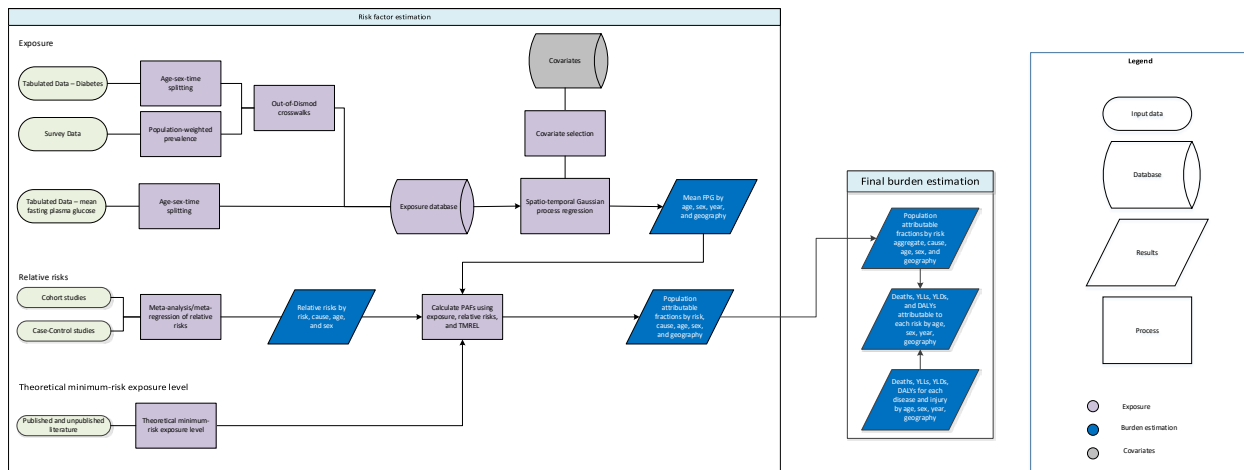

## Case Definition

High fasting plasma glucose (FPG) is defined as FPG of greater than 5 mmol/L.

## Data seeking

### Exposure

1. A systematic review of the literature was done for GBD 2016 with the following search terms:

**FPG search string:** (("glucose"[Mesh] OR "hyperglycemia"[Mesh] OR "prediabetic state"[Mesh]) AND "Geographic Locations"[Mesh] NOT "United States"[Mesh]) AND ("humans"[Mesh] AND "adult"[MeSH]) AND ("Data Collection"[Mesh] OR "Health Services Research"[Mesh] OR "Population Surveillance"[Mesh] OR "Vital statistics"[Mesh] OR "Population"[Mesh] OR "Epidemiology"[Mesh] OR "surve\*" [TiAb]) NOT Comment[ptyp] NOT Case Reports[ptyp] AND ("2016/01/01"[PDAT] : "2016/12/31"[PDAT]) NOT "hospital"[TiAb]

And

**Diabetes mellitus search string:** (diabetes[TI] AND (prevalence[TIAB] OR incidence[TIAB])) OR ("diabetes mellitus"[MeSH Terms] AND "epidemiology"[MeSH Terms]) OR (diabetes[TI] AND "epidemiology"[MeSH Terms]) NOT gestational[All Fields] NOT ("neoplasms"[MeSH Terms] OR "neoplasms"[All Fields] OR "cancer"[All Fields]) NOT ("mice"[MeSH Terms] OR "mice"[All Fields]) NOT ("schizophrenia"[MeSH Terms] OR "schizophrenia"[All Fields]) NOT ("emigrants and immigrants"[MeSH Terms] OR ("emigrants"[All Fields] AND "immigrants"[All Fields]) OR "emigrants and immigrants"[All Fields] OR "immigrants"[All Fields]) NOT ("pregnancy"[MeSH Terms] OR "pregnancy"[All Fields] OR "gestation"[All Fields]) NOT ("rats"[MeSH Terms] OR "rats"[All Fields] OR "rat"[All Fields]) NOT ("kidney"[MeSH Terms] OR "kidney"[All Fields]) NOT renal[All Fields] NOT ("vitamins"[Pharmacological Action] OR

"vitamins"[MeSH Terms] OR "vitamins"[All Fields] OR "vitamin"[All Fields]) AND ("2016/01/01"[PDAT] : "2016/12/31"[PDAT])

Search date: January 5, 2017

The search took place for the following dates: 1/1/2016– 12/31/2016. The number of studies returned was 1,976, and the number of studies extracted was 26.

2. We systematically searched the Global Health Data Exchange (GHDx) for multi-country survey programs, national surveys, and longitudinal studies that was tagged with either fasting plasma glucose (FPG) or Diabetes mellitus. Each data source we found was tagged with whether the file contained microdata and whether the file contained data on FPG (biomarker). In the interest of time, we prioritized the data sources we reviewed and extracted based on whether the source was tagged with microdata and biomarker information.

**Figure 1: PRISMA diagram of data sources used in GBD 2016 high fasting plasma glucose (FPG) model**

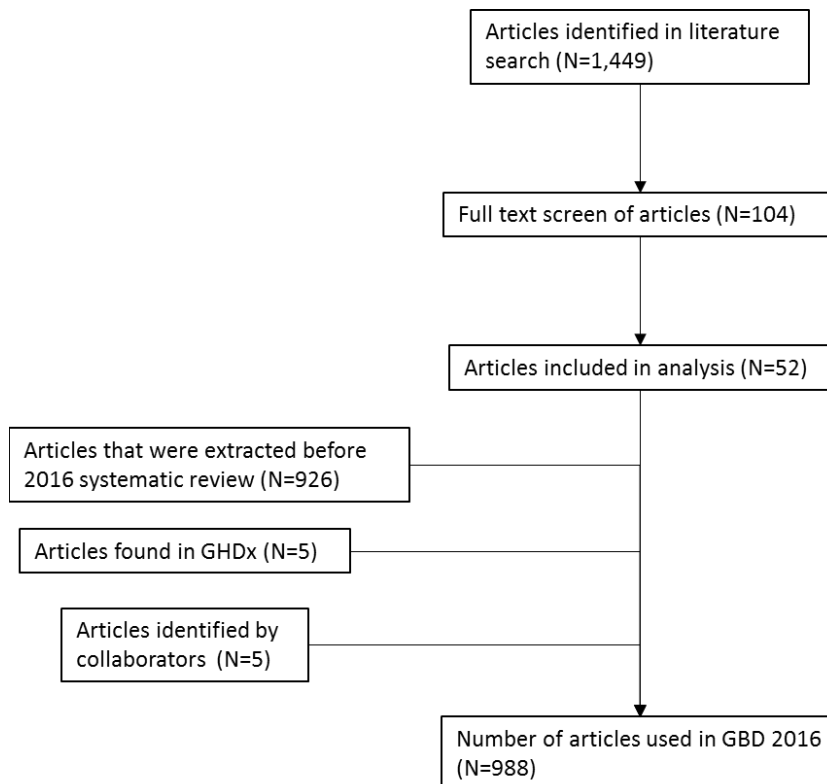

## Data Inputs

*Data:*

Data inputs come from 3 sources:

- Estimates of mean FPG in a representative population
- Individual-level data of fasting plasma glucose measured from surveys



- Estimates of diabetes prevalence in a representative population

Data sources that did not report mean FPG or prevalence of diabetes were excluded from analysis. When a study reported both mean fasting plasma glucose (FPG) and prevalence of diabetes, we used the mean FPG for exposure estimates. Where possible, individual-level data superseded any data described in a study. Individual-level data was collapsed and aggregated to produce estimates for each age group, sex, location, and year a survey is conducted.

## Data processing

We perform several processing steps to the data in order to address sampling and measurement inconsistencies that will ensure the data are comparable.

### 1. *Small sample size*

Estimates in a sex and age group with a sample size <30 persons was considered a small sample size. In order to avoid small sample size problems that may bias estimates, data were collapsed into the next age group in the same study till the sample size reached at least 30 persons. The intent of collapsing the data is to preserve as much granularity between age groups as possible which determined whether the collapse occurred with a younger or older age group. If the entire study sample consisted of <30 persons and did not include a population-weight, the study was excluded from the modeling process. The estimates were re-calculated if case count and sample size were available or the population-weighted estimate was calculated when only sample size was available.

### 2. *Time, Age, and Sex Splitting*

For more details on how datapoints on mean FPG was processed, please see the Diabetes mellitus capstone appendix in the GBD 2016 Non-fatal Paper.

### 3. *Crosswalks*

We predicted mean FPG from diabetes prevalence using an ensemble distribution. We characterized the distribution of FPG using individual-level data. For more details on the ensemble distribution, please see the GBD 2016 Risk Factors Paper. Before predicting mean FPG from prevalence of diabetes, we ensured that the prevalence of diabetes was based on the reference case definition: fasting plasma glucose (FPG) >126 mg/dL (7 mmol/L) or on treatment. For more details on how the case-definition crosswalk was conducted, please see the Diabetes mellitus capstone appendix in the GBD 2016 Non-fatal Paper.

## Exposure Modeling

Exposure estimates were produced from 1980 to 2016 for each national and subnational location, sex, and for each 5-year age group starting from 25+. As in GBD 2015, we used a Spatio-Temporal Gaussian Process Regression (ST-GPR) framework to model the mean fasting plasma glucose at the location-, year-, age-, sex- level. Updates to the ST-GR modeling framework for GBD 2016 are detailed in the appendix.

Fasting plasma glucose is frequently tested or reported in surveys aiming at assessing the prevalence of diabetes mellitus. In these surveys, the case definition of diabetes may include both a glucose test and questions about treatment for diabetes; people with positive history of diabetes treatment are generally excluded from the FPG test. Thus, the mean FPG in these surveys may not represent the mean FPG in the entire population. To address this limitation, using the data from the surveys reporting mean FPG in the entire population, we estimated a regression-based correction factor and adjusted the mean FPG to account for diabetics in the population. We also used an ensemble distribution to characterize the distribution of FPG in the population and developed an optimization function to estimate the standard deviation based on mean FPG and prevalence of diabetics.

To inform our estimates in data-sparse countries, we systematically tested a range of covariates and selected two covariates based on AIC and adjusted R<sup>2</sup>. These included prevalence of obesity and lag-distributed income per capita (LDI).

Mean FPG was estimated using a mixed-effects linear regression, run separately by sex:

$$\text{logit}(\text{FPG}_{c,a,t}) = \beta_0 + \beta_1 \log(\text{LDI})_{c,t} + \beta_2 p_{\text{overweight}_{c,a,t}} + \sum_{k=2}^{16} \beta_k I_{A[a]} + \alpha_s + \alpha_r + \alpha_c + \epsilon_{c,a,t}$$

where  $\log(\text{LDI})_{c,t}$  is the log of the lag-distributed income,  $p_{\text{overweight}_{c,a,t}}$  is the prevalence of overweight,  $I_{A[a]}$  is an indicator variable for a fixed effect on a given 5-year age group, and  $\alpha_s$   $\alpha_r$   $\alpha_c$  are random effects at the super-region, region, and country level, respectively.

The estimates were then propagated through the ST-GPR framework to obtain 1000 draws for each location, year, age, and sex.

## Theoretical minimum-risk exposure level

The theoretical minimum-risk exposure level (TMREL) for FPG is 4.5-5.4 mmol/L. This was calculated by taking the person-year weighted average of the levels of FPG that were associated with the lowest risk of mortality in the pooled analyses of prospective cohort studies.<sup>1</sup>

## Relative risks

We estimate 15 outcomes due to high fasting plasma glucose (continuous risk) or diabetes (categorical risk).

| Risk                   | Outcome                |
|------------------------|------------------------|
| Ischemic heart disease | Fasting plasma glucose |
| Ischemic stroke        | Fasting plasma glucose |

|                             |                        |
|-----------------------------|------------------------|
| Hemorrhagic stroke          | Fasting plasma glucose |
| Peripheral vascular disease | Fasting plasma glucose |
| Tuberculosis                | Diabetes mellitus      |
| Liver cancer                | Diabetes mellitus      |
| Pancreatic cancer           | Diabetes mellitus      |
| Ovarian cancer              | Diabetes mellitus      |
| Colorectal cancer           | Diabetes mellitus      |
| Bladder cancer              | Diabetes mellitus      |
| Lung cancer                 | Diabetes mellitus      |
| Breast cancer               | Diabetes mellitus      |
| Glaucoma                    | Diabetes mellitus      |
| Cataracts                   | Diabetes mellitus      |
| Dementia                    | Diabetes mellitus      |

#### Relative risks for High Fasting Plasma Glucose (continuous risk)

Relative risks (RR) were obtained from dose-response meta-analysis of prospective cohort studies. Please see the citation list for a full list of studies that are utilized. For cardiovascular outcomes, we estimated age-specific RRs using DisMod-MR 2.1 with log (RR) as the dependent variable and median age at event as the independent variable with an intercept at age 110. Morbidity and mortality directly caused by diabetes was considered directly attributable to FPG.

#### Relative risks for Diabetes mellitus (Categorical risk)

In GBD 2016, we added 10 additional outcomes for which we found sufficient evidence on their relationship with diabetes. These new outcomes included liver cancer, pancreas cancer, ovarian cancer, colorectal cancer, bladder cancer, lung cancer, breast cancer, glaucoma, cataracts, and dementia. In GBD 2016, tuberculosis was further split into drug-resistant tuberculosis, drug-susceptible tuberculosis, multi-drug resistant tuberculosis without extensive drug resistance, and extensively drug-resistant tuberculosis. Since studies of tuberculosis and diabetes did not differentiate types of tuberculosis, we assumed that the risk was the same. Relative risks were mostly obtained from meta-analysis of cohort studies. Please see the citation list for a full list of studies that are utilized.

## References

1 Singh GM, Danaei G, Farzadfar F, *et al.* The age-specific quantitative effects of metabolic risk factors on cardiovascular diseases and diabetes: a pooled analysis. *PLoS One* 2013; **8**: e65174.

# High Total Blood Cholesterol Capstone Appendix

## Flowchart

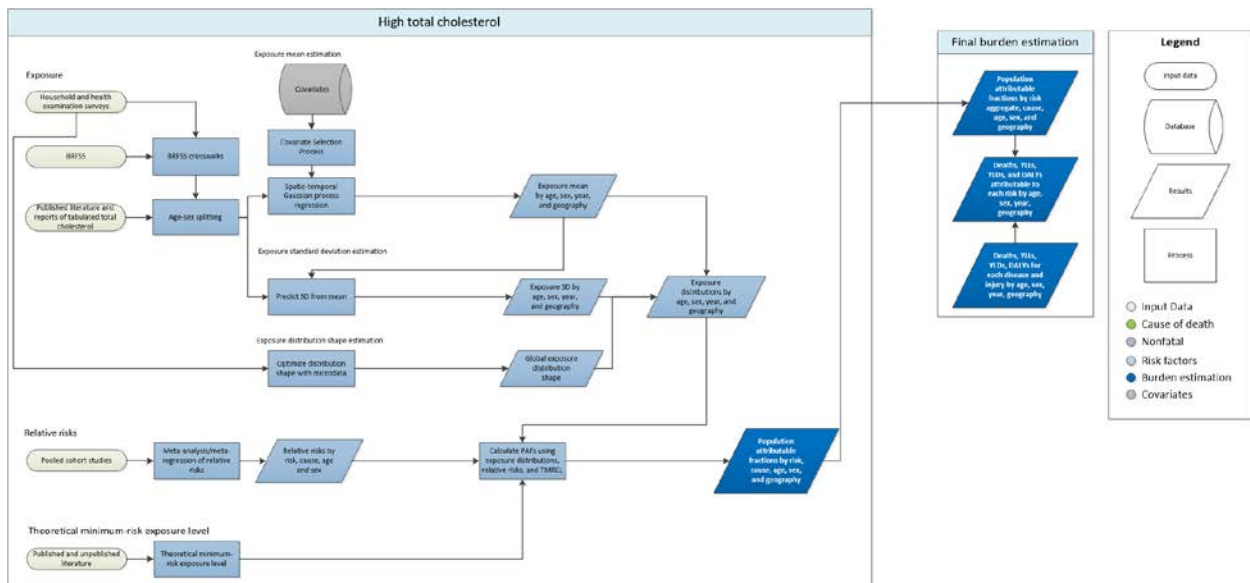

## Input Data & Methodological Summary

### Exposure

#### Case Definition

Blood total cholesterol in units of mmol/L.

#### Input Data

We utilized data on blood mean total cholesterol from literature and from household survey microdata and reports. Please see the appendix for a full list of included sources. For the GBD 2015 study, a systematic risk review of the literature was completed to capture population survey data on mean total blood cholesterol. For GBD 2016, we updated the systematic review using the same strategy, drawing from the GHDx and Medline via PubMed. In total, we have utilized 572 sources corresponding to 32,745 unique data points.

#### Literature Review

We systematically searched PubMed for articles published between 01 December 2015 and 31 December 2016 which provided national or subnational estimates of mean total blood cholesterol in the general population. The literature review was completed for systolic blood pressure, fasting plasma glucose, body mass index, and blood cholesterol simultaneously.

Search terms:

((("Hyperlipidemias"[Text Word] OR "Hypercholesterolemia"[Text Word] OR "Cholesterol"[Text Word]) AND "Geographic Locations"[Mesh] NOT "United States"[Mesh]) AND ("Data Collection"[Mesh] OR

"Health Services Research"[Mesh] OR "Population Surveillance"[Mesh] OR "Vital statistics"[Mesh] OR "Population"[Mesh] OR "Epidemiology"[Mesh] OR "surve\*"[TiAb]) NOT Comment[ptyp] NOT Case Reports[ptyp] AND ("2015/12/01"[PDAT] : "2016/10/18"[PDAT]) NOT "hospital"[TiAb]

#### *Inclusion Criteria*

Studies were included if they were population-based and measured total blood cholesterol using a blood test. We assumed the data is representative of the location if the geography was not related to the diseases (a mining area) and if it is not an outlier compared to other data in the country or region.

#### *Outliers*

Data was utilized in the modeling process unless an assessment of data strongly suggested that the data was biased. A candidate source was excluded if the quality of study did not warrant a valid estimate because of selection (non-representative populations) or if the study did not provide methodological details for evaluation. In a small number of cases, data point was considered to be an outlier candidate if the level was implausibly low or high based on expert judgement and other country data.

#### *Data Extraction*

Where possible, individual level data on blood pressure estimates were extracted from survey microdata and these were collapsed across individuals and collapsed across demographic groupings to produce mean estimates in the standard GBD 5-year age-sex groups. If microdata were unavailable, information from survey reports or from literature were extracted along with any available measure of uncertainty including standard error, uncertainty intervals, and sample size. Standard deviations were also extracted.

#### *Incorporating United States prevalence data*

Survey reports and literature often report information only about the prevalence, but not the level, of hypercholesterolemia in the population studied. These sources were not used to model total cholesterol, with the exception of data from the Behavioral Risk Factors Surveillance System (BRFSS) because of the availability of a similarly structured exam survey covering the identical population (NHANES). BRFSS is a telephone survey conducted in the United States for all counties. It collects self-reported diagnosis of hypercholesterolemia. These self-reported values of prevalence of raised total cholesterol in each age group, sex, US state, and year were used to predict a mean total cholesterol for the same strata with a regression using data from the National Health and Nutrition Examination Survey, a nationally representative health examination survey of the US adult population. The regression was:

$$TC_{l,a,t,s} = \beta_0 + \beta_1 \text{prev}_{l,a,t,s}$$

where  $TC_{l,a,t,s}$  is the location, age, time, and sex specific mean total cholesterol and  $\text{prev}_{l,a,t,s}$  is the location, age, time, and sex specific prevalence of raised total cholesterol. The coefficients for both models are reported in Table 1.

Table 1. Coefficients in the sex-specific US states blood pressure prediction models

| Term       | Male model | Female model |
|------------|------------|--------------|
| Intercept  | 4.23       | 4.36         |
| Prevalence | 6.25       | 5.22         |

Out of sample RMSE was used to quantify the predictive validity of the model. The regression was repeated 10 times for each sex, each time randomly holding out 20% of the data. The RMSEs from each holdout analysis were averaged to get the average out of sample RMSE. The results of this holdout analysis are reported in Table 2.

Table 2. Out of sample RMSEs of the sex-specific US states blood pressure prediction models

|                    | Male model  | Female model |
|--------------------|-------------|--------------|
| Out of sample RMSE | 0.21 mmol/L | 0.20 mmol/L  |

#### Age and Sex Splitting

Prior to modeling, data provided in age groups wider than the GBD 5-year age groups were processed using the approach outlined in Ng et al.<sup>2</sup> Briefly, age-sex patterns were identified using person-level microdata (58 sources), and estimate age-sex specific levels of total cholesterol from aggregated results reported in published literature or survey reports.

#### Modeling

Exposure estimates were produced from 1980 to 2016 for each national and subnational location, sex, and for each 5-year age group starting from 25+. As in GBD 2015, we used a Spatio-Temporal Gaussian Process Regression (ST-GPR) framework to model the mean total blood cholesterol at the location-, year-, age-, sex- level. Updates to the ST-GR modeling framework for GBD 2016 are detailed in the appendix.

#### Covariate selection

The first step of the ST-GPR framework requires the creation of a linear model for predicting total cholesterol at the location-, year-, age-, sex- level. Covariates for this model were selected in two stages. First a list of variables with an expected causal relationship with total cholesterol was created based on significant association found within high-quality prospective cohort studies reported in the published scientific literature. These variables were: dietary fiber availability, dietary fruit availability, dietary polyunsaturated fatty acid (PUFA) availability, dietary nuts and seeds availability, and the prevalence of overweight persons in a population. We also explored associations with the GBD study socio-demographic index (SDI) covariate, and the health access quality index (HAQI) covariate to represent the effect of proximal socioeconomic factors and access to health care on exposure levels. The second stage in covariate selection was to test the predictive validity of every possible combination of covariates in the linear model, given the covariates selected above. This was done separately for

each sex. Predictive validity was measured with out of sample root-mean-squared error. The linear model with the lowest root-mean squared error for each sex was then used in the ST-GPR model. For women, this linear model was:

$$\log(\text{TC}_{c,a,t}) = \beta_0 + \beta_1 \text{SDI}_{c,t} + \beta_2 \text{HAQI}_{c,a,t} + \beta_3 \text{nuts}_{c,a,t} + \beta_4 \text{fiber}_{c,a,t} + \sum_{k=2}^{16} \beta_k I_{A[a]} + \alpha_s + \alpha_r + \epsilon_{c,a,t}$$

For men, the linear model was:

$$\log(\text{TC}_{c,a,t}) = \beta_0 + \beta_1 \text{SDI}_{c,t} + \beta_2 \text{HAQI}_{c,a,t} + \beta_4 \text{prev\_overweight}_{c,a,t} + \beta_3 \text{PUFA}_{c,a,t} + \beta_4 \text{fiber}_{c,a,t} + \sum_{k=2}^{16} \beta_k I_{A[a]} + \alpha_s + \alpha_r + \epsilon_{c,a,t}$$

where  $\text{SDI}_{c,t}$  is socio-demographic index (SDI), an index metric that includes a measure of education, fertility, and income, HAQI is the health access quality index,  $\text{prev\_overweight}_{c,a,t}$  is the prevalence of overweight,  $\text{nuts}_{c,a,t}$  is the calorie adjusted food availability of nuts and seeds,  $\text{PUFA}_{c,a,t}$  is the calorie adjusted food availability of poly-unsaturated fatty acids per capita per day,  $\text{fiber}_{c,a,t}$  is the calorie adjusted food availability of fiber,  $I_{A[a]}$  is a dummy variable for a fixed effect on a given 5-year age group, and  $\alpha_s$  and  $\alpha_r$  are random effects at the super-region and region level, respectively. Table 3 contains the coefficients of the fixed effects used in the two regressions.

Table 3. Coefficients on covariates in sex-specific linear models

| Covariate  | Male                             | Female                           |
|------------|----------------------------------|----------------------------------|
| Fiber      | -0.00287<br>(-0.0034 to -0.0022) | -0.00196<br>(-0.0025 to -0.0014) |
| Nuts/seeds | NA                               | -0.00364<br>(-0.004 to -0.003)   |
| SDI        | 0.317<br>(0.278 to 0.356)        | 0.307<br>(0.271 to 0.343)        |
| HAQI       | -0.0016<br>(-0.0021 to -0.0012)  | -0.0008<br>(-0.0011 to -0.0004)  |
| PUFA       | -0.533<br>(-0.719 to -0.347)     | NA                               |

|                          |                              |    |
|--------------------------|------------------------------|----|
| Prevalence of overweight | 0.0364<br>(0.0138 to 0.0591) | NA |
|--------------------------|------------------------------|----|

The estimates were then propagated through the ST-GPR framework to obtain 1000 draws for each location, year, age, and sex. Table 4 contains the out of sample root-mean-squared error (RMSE) of both the linear model and the final ST-GPR results for the male and female models.

*Table 4. Out of sample RMSEs of the sex-specific linear and ST-GPR models*

|                    | Out of sample RMSEs for male model | Out of sample RMSEs for female model |
|--------------------|------------------------------------|--------------------------------------|
| Linear model       | 0.323 mmol/L                       | 0.336 mmol/L                         |
| Final ST-GPR model | 0.176 mmol/L                       | 0.173 mmol/L                         |

#### *Estimate of standard deviation*

The standard deviation of total cholesterol within a population was estimated for each national and subnational location, sex, and 5-year age group starting from age 25 using the standard deviation from person-level and some tabulated data sources. Person-level microdata accounted for 3009 of the total 4001 rows of data on standard deviation. The remaining 992 rows came from tabulated data. Tabulated data was only used to model standard deviation if it was sex and 5-year age group specific and reported a population standard deviation of total cholesterol. The total cholesterol standard deviation function was estimated using a linear regression:

$$\log(\text{SD}_{c,a,t,s}) = \beta_0 + \beta_1 \text{TC}_{c,a,t,s} + \beta_3 (\text{TC}_{c,a,t,s})^2 + \beta_4 \text{sex} + \sum_{k=2}^{16} \beta_k I_{A[a]} + \alpha_s + \epsilon_{c,a,t,s}$$

where  $\text{TC}_{c,a,t,s}$  is the country, age, time, and sex specific mean total cholesterol estimate from ST-GPR,  $I_{A[a]}$  is a dummy variable for a fixed effect on a given 5-year age group, and  $\alpha_s$  is a random effect at the super-region level.

#### *Distribution shape modelling*

The shape of the distribution of total cholesterol was estimated using all available person-level microdata sources, which was a subset of the input data into the modelling process. The distribution shape modelling framework for GBD 2016 is detailed in the appendix. Briefly, an ensemble distribution created from a weighted average of distribution families was fit for each individual microdata source,



separately by sex. The weights for the distribution families for each individual source were then averaged and weighted to create a global ensemble distribution for each sex.

### Theoretical minimum-risk exposure level

The TMREL for total cholesterol was the same as that used in GBD2015. A Meta-analysis of randomized trials has shown that outcomes can be improved even at low levels of LDL-cholesterol, below 1.3 mmol/l.<sup>3</sup> Recent studies of PCSK-9 inhibitors support these results. We used the strong correlation between LDL-cholesterol and total cholesterol to map the proposed LDL-cholesterol TMREL of 0.7-1.3 mmol/l to a TMREL for total cholesterol of 2.8-3.4 mmol/l.

### Relative Risks

We used Dismod-MR 2.1 to pool effect sizes from included studies and generate a dose-response curve for each of the outcomes associated with high total cholesterol. The tool enabled us to incorporate random effects across studies and include data with different age ranges. RRs were used universally for all countries and the meta-regression only helped to pool the three major sources and produce RRs with uncertainty and covariance across ages taking into account the uncertainty of the data points

As in GBD 2015, RRs for IHD and ischemic stroke are obtained from meta-regressions of pooled epidemiological studies: the Asia Pacific Cohort Studies Collaboration (APCSC) and the Prospective Studies Collaboration (PSC).<sup>4</sup> RRs for IHD were modeled with log (RR) as the dependent variable and median age at event as the independent variable with an age intercept (RR equals 1) at age 110. For total cholesterol and ischemic stroke, a similar approach was used, except that there was no age intercept at age 110, due to the fact that there was no statistically significant relationship between total cholesterol and stroke after age 70 with a mean RR less than one. We assumed that there is not a protective effect of high cholesterol and therefore did not include an RR for ages 80+.

### References

- 1 Roth GA, Fihn SD, Mokdad AH, Aekplakorn W, Hasegawa T, Lim SS. High total serum cholesterol, medication coverage and therapeutic control: an analysis of national health examination survey data from eight countries. *Bull World Health Organ* 2011; **89**: 92–101.
- 2 Ng M, Fleming T, Robinson M, *et al.* Global, regional, and national prevalence of overweight and obesity in children and adults during 1980–2013: a systematic analysis for the Global Burden of Disease Study 2013. *The Lancet* 2014; **384**: 766–81.
- 3 Boekholdt SM, Hovingh GK, Mora S, *et al.* Very Low Levels of Atherogenic Lipoproteins and the Risk for Cardiovascular Events A Meta-Analysis of Statin Trials. *J Am Coll Cardiol* 2014; **64**: 485–94.

4 Singh GM, Danaei G, Farzadfar F, *et al.* The age-specific quantitative effects of metabolic risk factors on cardiovascular diseases and diabetes: a pooled analysis. *PLoS One* 2013; **8**: e65174.

# High Systolic Blood Pressure Capstone Appendix

## Flowchart

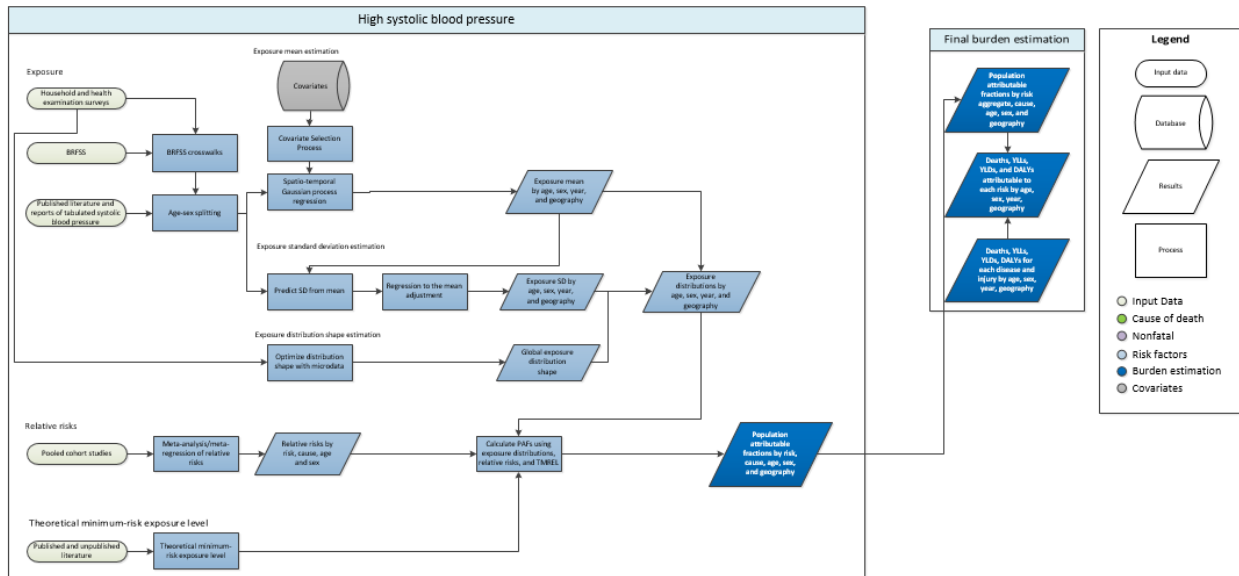

## Input Data & Methodological Summary

### Exposure

#### Case Definition

Brachial systolic blood pressure in mmHg.

#### Input Data

We utilized data on mean systolic blood pressure from literature and from household survey microdata and reports (e.g. STEPS, NHANES). Please see the appendix for a full list of included sources. In GBD 2015, a systematic review of the literature was completed to capture population survey data on mean systolic blood pressure. For GBD 2016, we updated the systematic review using the same strategy, drawing from the GHDx and Medline via PubMed. In total, we have utilized 934 sources corresponding to 49,690 unique data points.

#### Literature Review

We systematically searched PubMed for articles published between 01 December 2015 and 31 December 2016 which provided national or subnational estimates of mean systolic blood pressure. The literature review was completed for systolic blood pressure, fasting plasma glucose, body mass index, and blood cholesterol simultaneously.

Search terms:

((("Hyperlipidemias"[Text Word] OR "Hypercholesterolemia"[Text Word] OR "Cholesterol"[Text Word]) AND "Geographic Locations"[Mesh] NOT "United States"[Mesh]) AND ("Data Collection"[Mesh] OR "Health Services Research"[Mesh] OR "Population Surveillance"[Mesh] OR

"Vital statistics"[Mesh] OR "Population"[Mesh] OR "Epidemiology"[Mesh] OR "surve\*"[TiAb])  
NOT Comment[ptyp] NOT Case Reports[ptyp] AND ("2015/12/01"[PDAT] : "2016/12/31"[PDAT])  
NOT "hospital"[TiAb]

#### *Inclusion Criteria*

Studies were included if they were population-based and measured systolic blood pressure using a blood test. We assumed the data is representative of the location if the geography was not selected because it was related to the diseases.

#### *Outliers*

Data was utilized in the modeling process unless an assessment of data strongly suggested that the data was biased. A candidate source was excluded if the quality of study did not warrant a valid estimate because of selection (non-representative populations) or if the study did not provide methodological details for evaluation. In a small number of cases, a data point was considered to be an outlier candidate if the level was implausibly low or high based on expert judgement and data from other country data.

#### *Data Extraction*

Where possible, individual level data on blood pressure estimates were extracted from survey microdata and these were collapsed across individuals and collapsed across demographic groupings to produce mean estimates in the standard GBD 5-year age-sex groups. If microdata were unavailable, information from survey reports or from literature were extracted along with any available measure of uncertainty including standard error, uncertainty intervals, and sample size. Standard deviations were also extracted.

#### *Incorporating United States prevalence data*

Survey reports and literature often report information only about the prevalence, but not the level, of hypertension in the population studied. These sources were not used to model systolic blood pressure, with the exception of data from the Behavioral Risk Factors Surveillance System (BRFSS) because of the availability of a similarly structured exam survey that is representative of the same population (NHANES). BRFSS is a telephone survey conducted in the United States for all US counties. It collects self-reported diagnosis of hypertension. These self-reported values of prevalence of raised blood pressure were adjusted for self-report bias and tabulated by age group, sex, US state, and year. These prevalences were used to predict a mean systolic blood pressure for the same strata with a regression using data from the National Health and Nutrition Examination Survey, a nationally representative health examination survey of the US adult population. The regression was run separately by sex, and was specified as:

$$SBP_{l,a,t,s} = \beta_0 + \beta_1 \text{prev}_{l,a,t,s}$$

where  $SBP_{l,a,t,s}$  is the location, age, time, and sex specific mean systolic blood pressure and  $\text{prev}_{l,a,t,s}$  is the location, age, time, and sex specific prevalence of raised blood pressure. The coefficients for both models are reported in Table 1.

Table 1. Coefficients in the sex-specific US states blood pressure prediction models

| Term       | Male model | Female model |
|------------|------------|--------------|
| Intercept  | 114.65     | 108.28       |
| Prevalence | 51.86      | 68.87        |

Out of sample RMSE was used to quantify the predictive validity of the model. The regression was repeated 10 times for each sex, each time randomly holding out 20% of the data. The RMSEs from each holdout analysis were averaged to get the average out of sample RMSE. The results of this holdout analysis are reported in Table 2.

Table 2. Out of sample RMSEs of the sex-specific US states blood pressure prediction models

|                    | Male model | Female model |
|--------------------|------------|--------------|
| Out of sample RMSE | 2.37 mmHg  | 3.27 mmHg    |

#### Age and Sex Splitting

Prior to modeling, data provided in age groups wider than the GBD 5-year age groups were processed using the approach outlined in Ng et al.<sup>2</sup> Briefly, age-sex patterns were identified using 115 sources of microdata with multiple age-sex groups, and these patterns were applied to estimate age-sex specific levels of mean systolic blood pressure from aggregated results reported in published literature or survey reports.

#### Modeling

Exposure estimates were produced from 1980 to 2016 for each national and subnational location, sex, and for each 5-year age group starting from 25+. As in GBD 2015, we used a Spatio-Temporal Gaussian Process Regression (ST-GPR) framework to model the mean systolic blood pressure at the location-, year-, age-, sex- level. Updates to the ST-GR modeling framework for GBD 2015 are detailed in the appendix.

#### Covariate selection

The first step of the ST-GPR framework requires the creation of a linear model for predicting systolic blood pressure at the location-, year-, age-, sex- level. Covariates for this model were selected in two stages. First a list of variables with an expected causal relationship with systolic blood pressure was created based on significant association found within high-quality prospective cohort studies reported in the published scientific literature. These variables were: urinary sodium, liters per capita of alcohol, dietary availability of vegetables, dietary availability of fruits, dietary availability of omega-3 fatty acids, the prevalence of smoking, dietary availability of nuts and seeds, and the prevalence of overweight. We also explored associations with the GBD study socio-demographic index (SDI) covariate, and the GBD study health access quality index (HAQI) covariate to represent the effect of proximal socioeconomic factors and access to health care on exposure levels. The second stage in covariate selection was to test the predictive validity of every possible combination of covariates in the linear model, given the

covariates selected above. This was done separately for each sex. Predictive validity was measured with out of sample root-mean-squared error. The linear model with the lowest root-mean squared error for each sex was then used in the ST-GPR model. For women, this linear model was:

$$\log(\text{SBP}_{1,a,t}) = \beta_0 + \beta_1 \text{SDI}_{1,t} + \beta_2 \text{nuts} + \beta_3 \text{HAQI} + \sum_{k=2}^{16} \beta_k I_{A[a]} + \alpha_s + \alpha_r + \alpha_c + \epsilon_{1,a,t}$$

For men, the linear model was:

$$\log(\text{SBP}_{1,a,t}) = \beta_0 + \beta_1 \text{SDI}_{1,t} + \beta_2 \text{alcohol} + \beta_3 \text{HAQI} + \sum_{k=2}^{16} \beta_k I_{A[a]} + \alpha_s + \alpha_r + \alpha_c + \epsilon_{1,a,t}$$

where  $\text{SDI}_{c,t}$  is socio-demographic index (SDI), an index metric that includes a measure of education and income,  $\text{HAQI}_{c,t}$  is the health access quality index,  $\text{nuts}_{c,t}$  is the dietary availability of nuts and seeds,  $\text{alcohol}_{c,t}$  is the liters per capita of alcohol consumed,  $I_{A[a]}$  is a dummy variable for a fixed effect on a given 5-year age group, and  $\alpha_s$   $\alpha_r$   $\alpha_c$  are random effects at the super-region, region, and country level, respectively. Table 3 contains the coefficients of the fixed effects used in the two regressions.

Table 3. Coefficients on covariates in the sex-specific linear models

| Covariate   | Coefficients from male model    | Coefficients from female model  |
|-------------|---------------------------------|---------------------------------|
| Alcohol LPC | 0.0003<br>(0.0002 to -00.0004)  | NA                              |
| Nuts/seeds  | -0.0024<br>(-0.0027 to -0.0022) | -0.0028<br>(-0.0031 to -0.0025) |
| SDI         | 0.088<br>(0.074 to 0.102)       | 0.121<br>(0.100 to 0.142)       |
| HAQI        | NA                              | -0.0016<br>(-0.0019 to -0.0014) |

The estimates were then propagated through the ST-GPR framework to obtain 1000 draws for each location, year, age, and sex. Table 4 contains the out of sample root-mean-squared error (RMSE) of both the linear model and the final ST-GPR results for the male and female models.

*Table 4. Out of sample RMSEs of the sex-specific linear and ST-GPR models*

|                    | Out of sample RMSEs for male model | Out of sample RMSEs for female model |
|--------------------|------------------------------------|--------------------------------------|
| Linear model       | 6.469 mmHg                         | 5.985 mmHg                           |
| Final ST-GPR model | 3.56 mmHg                          | 3.77 mmHg                            |

#### *Estimate of Standard Deviation*

Currently, the ST-GPR model only produces an estimate of mean exposure level without standard deviation. Therefore, the standard deviation of systolic blood pressure within a population was estimated for each national and subnational location, sex, and 5-year age group starting from age 25 using the standard deviation from person-level and some tabulated data sources. Person-level microdata accounted for 10375 of the total 12570 rows of data on standard deviation. The remaining 2195 rows came from tabulated data. Tabulated data was only used to model standard deviation if it was sex and 5-year age group specific and reported a population standard deviation of systolic blood pressure. The systolic blood pressure standard deviation function was estimated using a linear regression:

$$\log(\text{SD}_{l,a,t,s}) = \beta_0 + \beta_1 \text{SBP}_{l,a,t,s} + \beta_3 (\text{SBP}_{l,a,t,s})^2 + \beta_4 \text{sex} + \sum_{k=2}^{16} \beta_k I_{A[a]} + \alpha_s + \epsilon_{l,a,t,s}$$

where  $\text{SBP}_{l,a,t,s}$  is the location, age, time, and sex specific mean total cholesterol estimate from ST-GPR,  $I_{A[a]}$  is a dummy variable for a fixed effect on a given 5-year age group, and  $\alpha_s$  is a random effect at the super-region level.

#### *Adjustment for Usual Levels of Blood Pressure*

To account for in-person variation in systolic blood pressure, a ‘usual blood pressure’ adjustment was done. The need for this adjustment has been described elsewhere.<sup>5</sup> Briefly, measurements of a risk factor taken at a single time point may not accurately capture an individual’s true long-term exposure to that risk. Blood pressure readings are highly variable over time due to measurement error as well as diurnal, seasonal, or biological variation. These sources of variation result in an over-estimation of the variation in cross-sectional studies of the distribution of SBP.

To adjust for this overestimation, we applied a correction factor to each location-, age-, time-, and sex-specific standard deviation. These correction factors were age-specific, and represented the proportion of the variation in blood pressure within a population that would be observed if there were no within-person variation across time. Four longitudinal surveys were used to estimate these factors: the China Health and Retirement Longitudinal Survey (CHRLS), the Indonesia Family Life Survey (IFLS), the National Health and Nutrition Examination Survey I Epidemiological Follow-up Study (NHANES I/EFS), and the South Africa National Income Dynamics Survey (NIDS). The sample size and number of blood pressure measurements at each measurement period for each survey is reported in Table 5.

*Table 5. Characteristics of longitudinal surveys used for the usual blood pressure adjustment*

| Source       | Measurement period | Number of measurements | Sample size |
|--------------|--------------------|------------------------|-------------|
| CHRLS        | 2008               | 3                      | 1967        |
|              | 2012               | 3                      | 1419        |
| IFLS         | 1997               | 1                      | 19418       |
|              | 2000               | 1                      | 16626       |
|              | 2007               | 3                      | 14136       |
| NIDS         | 1997               | 2                      | 14084       |
|              | 2000               | 2                      | 9612        |
|              | 2007               | 2                      | 9098        |
| NHANES I/EFS | 1971-1976          | 2                      | 20716       |
|              | 1982-1984          | 3                      | 9932        |

For each survey, the following regression was created for each age group:

$$SBP_{i,a} = \beta_0 + \beta_1 \text{sex} + \beta_3 \text{age} + u_i$$



where  $SBP_{i,a}$  is the systolic blood pressure of an individual  $i$  at age  $a$ , sex is a dummy variable for the sex of an individual, age is a continuous variable for the age of an individual, and  $u_i$  is a random intercept for each individual. Then, a blood pressure value  $\widehat{SBP}_{i,b}$  was predicted for each individual  $i$  for his/her age at baseline  $b$ . The correction factor  $cf$  for each age group within each survey was calculated as variation in these predicted blood pressures was divided by the variation in the observed blood pressures at baseline,  $SBP_{i,b}$ :

$$cf = \frac{\text{var}(\widehat{SBP}_b)}{\text{var}(SBP_b)}$$

The average of the correction factors was taken over the three surveys to get one set of age-specific correction factors, which were then multiplied by the square of the modeled standard deviations to estimate standard deviation of the 'usual blood pressure' of each age, sex, location, and year. Because of low sample sizes, the correction factors for the 75-79 age group was used for all terminal age groups. The final correction factors for each age group are reported in Table 6. Figure 1 shows the correction factors by survey and age group ID.

s

*Table 6. Age-specific usual blood pressure correction factors*

| Age group | Correction factor |
|-----------|-------------------|
| 25-29     | .665              |
| 30-34     | .713              |
| 35-39     | .737              |
| 40-44     | .733              |
| 45-49     | .798              |
| 50-54     | .771              |
| 55-59     | .764              |
| 60-64     | .753              |
| 65-69     | .719              |
| 70-74     | .689              |
| 75+       | .678              |

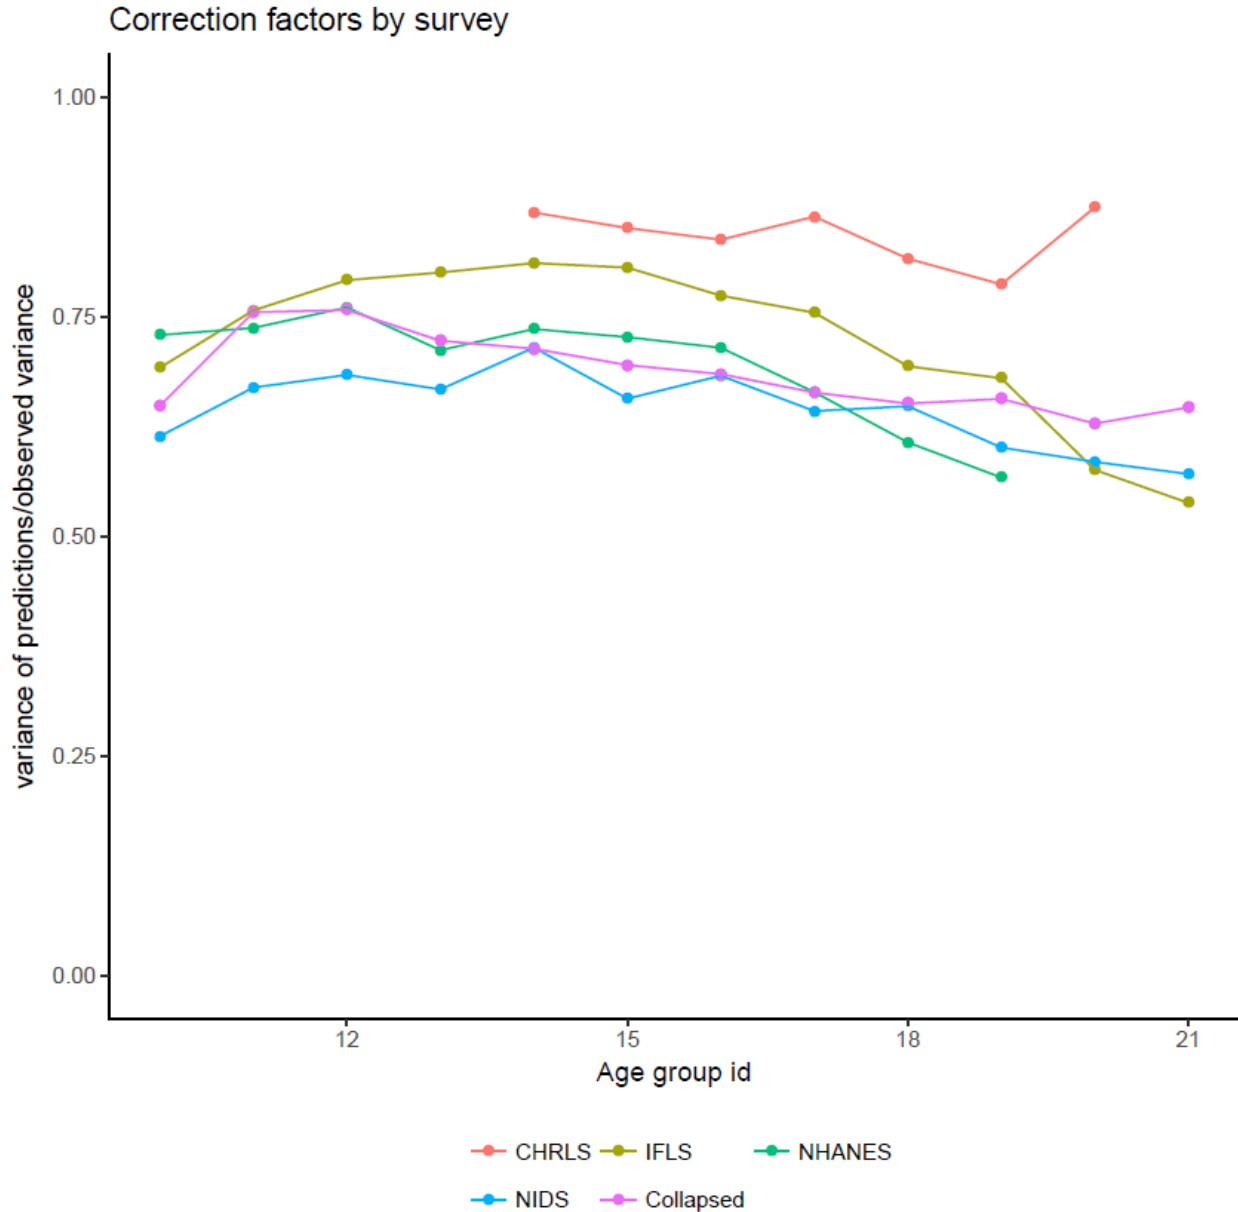

Figure 1: Correction factor by survey and age group id. The correction factor is equal to the variance of the predictions divided by the variance of the raw dataset. In pink is the average correction factor for each age group, summarized in Table 6.

A visualization of how the uncorrected blood pressure measurements overestimate the ‘usual’ blood pressure variation is shown in Figure 1. This image shows the density of the distribution of the observed blood pressure values  $SBP_{i,b}$  in participants in the Indonesian Family Life Study survey in red, and the density of the predicted blood pressure values  $\widehat{SBP}_{i,b}$  in blue. The ratio of the variance of the blue distribution to the variance of the red distribution is an example of the scalar adjustment factor being applied to the modeled standard deviations.

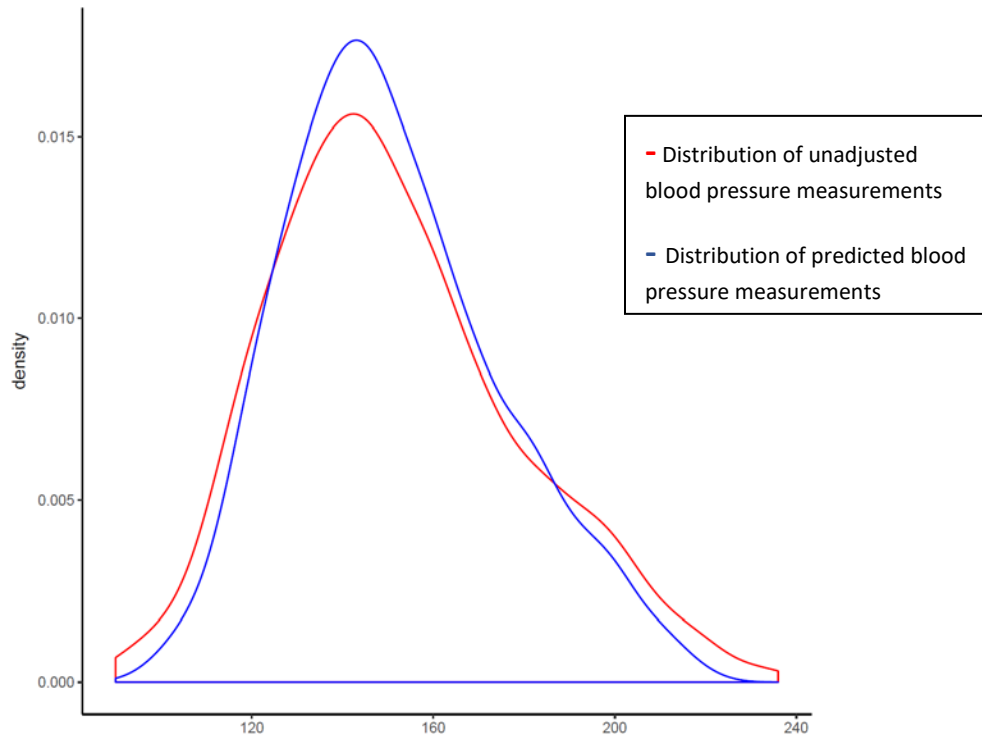

Figure 2: Raw and predicted distributions of blood pressure in the Indonesia Family Life Survey

### Estimating the exposure distribution shape

The shape of the distribution of systolic blood pressure was estimated using all available person-level microdata sources, which was a subset of the input data into the modelling process. The distribution shape modelling framework for GBD 2016 is detailed in the appendix. Briefly, an ensemble distribution created from a weighted average of distribution families was fit for each individual microdata source, separately by sex. The weights for the distribution families for each individual source were then averaged and weighted to create a global ensemble distribution for each sex.

### Theoretical minimum-risk exposure level

No changes were made to TMREL used in the GBD2015 study. We estimated that the TMREL of SBP ranges from 110 to 115 mm Hg based on pooled prospective cohort studies that show risk of mortality increases for SBP above that level.<sup>3,4</sup> Our selection of a TMREL of 110-115 mmHg is consistent with the GBD study approach of estimating all attributable health loss that could be prevented even if current interventions do not exist that can achieve such a change in exposure level, for example a tobacco smoking prevalence of zero percent. To include the uncertainty in the TMREL, we took a random draw from the uniform distribution of the interval between 110 mm and 115 mm Hg each time the population attributable burden was calculated.

## Relative risks

No change was made to RR for blood pressure outcomes used in the GBD2015 study. RRs for chronic kidney disease are from the Renal Risk Collaboration meta-analysis of 2.7 million individuals in 106 cohorts. For other outcomes, we used data from two pooled epidemiological studies: the Asia Pacific Cohort Studies Collaboration (APCSC) and the Prospective Studies Collaboration (PSC).<sup>4,7</sup> In GBD 2015, we have added additional estimates of RR for cardiovascular outcomes from the CALIBER study, a health-record linkage cohort study from the UK.<sup>8</sup>

For cardiovascular disease, epidemiological studies have shown that the RR associated with SBP declines with age, with the log (RR) having an approximately linear relationship with age and reaching a value of 1 between the ages of 100 and 120. RRs were reported per 10 mm Hg increase in SBP above TMREL value (115 mm Hg) as in the equation below:

$$RR_x = RR^{(x-TMREL)}$$

We used Dismod-MR 2.1 to pool effect sizes from included studies and generate a dose-response curve for each of the outcomes associated with high SBP. The tool enabled us to incorporate random effects across studies and include data with different age ranges. RRs were used universally for all countries and the meta-regression only helped to pool the three major sources and produce RRs with uncertainty and covariance across ages taking into account the uncertainty of the data points

## References

- 1 Bangalore S, Gong Y, Cooper-DeHoff RM, Pepine CJ, Messerli FH. 2014 Eighth Joint National Committee panel recommendation for blood pressure targets revisited: results from the INVEST study. *J Am Coll Cardiol* 2014; **64**: 784–93.
- 2 Ng M, Fleming T, Robinson M, *et al*. Global, regional, and national prevalence of overweight and obesity in children and adults during 1980–2013: a systematic analysis for the Global Burden of Disease Study 2013. *The Lancet* 2014; **384**: 766–81.
- 3 Singh GM, Danaei G, Farzadfar F, *et al*. The age-specific quantitative effects of metabolic risk factors on cardiovascular diseases and diabetes: a pooled analysis. *PLoS One* 2013; **8**: e65174.
- 4 Collaboration APCSC, others. Blood pressure and cardiovascular disease in the Asia Pacific region. *J Hypertens* 2003; **21**: 707–16.
- 5 Prospective Studies Collaboration. Age-specific relevance of usual blood pressure to vascular mortality: a meta-analysis of individual data for one million adults in 61 prospective studies. *The Lancet* 2002; **360**: 1903–13.
- 6 Rapsomaniki E, Timmis A, George J, *et al*. Blood pressure and incidence of twelve cardiovascular diseases: lifetime risks, healthy life-years lost, and age-specific associations in 1.25 million people. *Lancet Lond Engl* 2014; **383**: 1899–911.

# High Body-Mass index Flowchart

Adult (Ages 20+) High Body-Mass Index: Data and Model Flow Chart

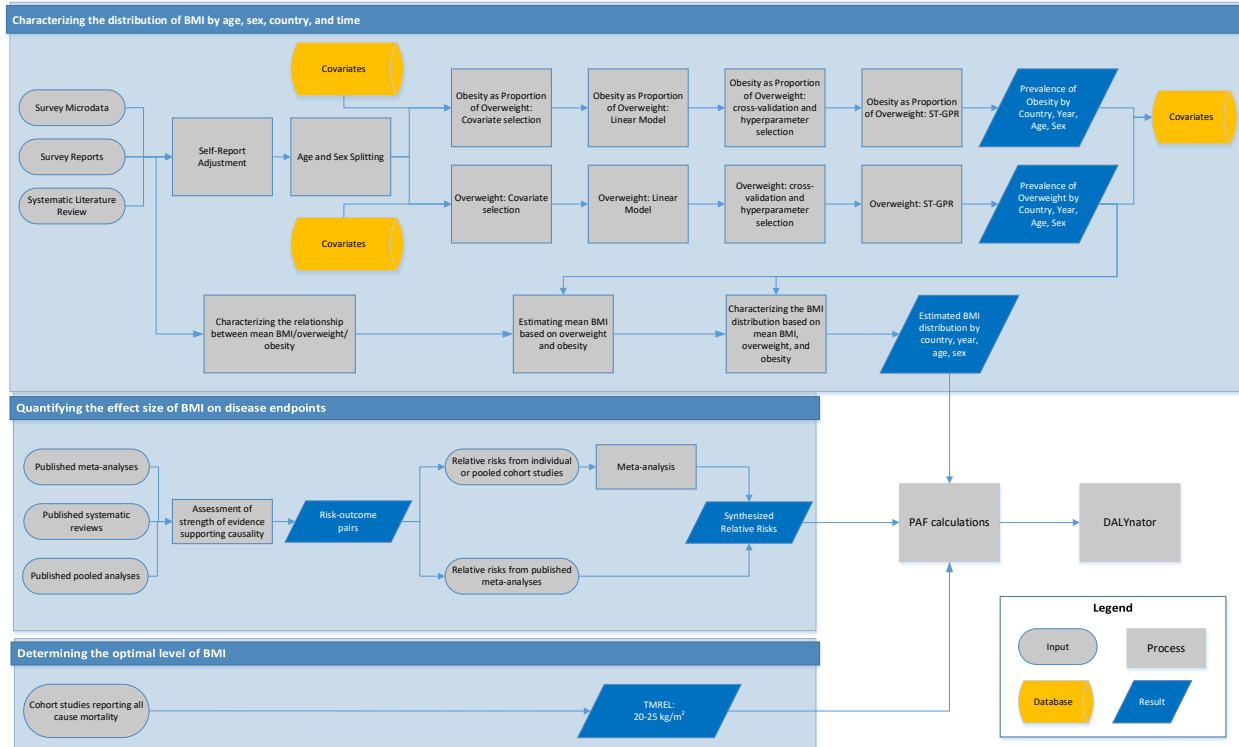

Childhood (Ages 2-19) High Body-Mass Index: Data and Model Flow Chart

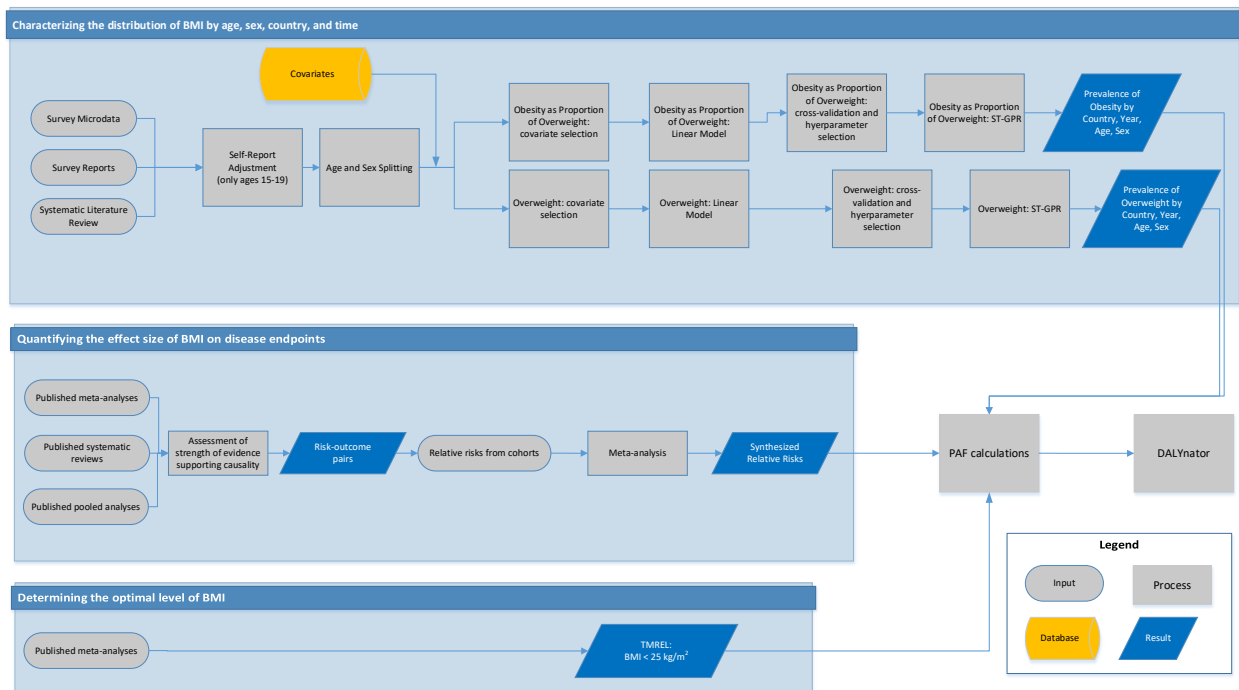

## Case Definitions

High body-mass index (BMI) for adults (ages 20+) is defined as BMI greater than 22.5. High BMI for children (ages 1-19) is defined as being overweight or obese based on IOTF cutoffs.

## Input data and Methodological Summary

### Data Sources

We systematically searched Medline to identify studies providing nationally or subnationally representative estimates of overweight prevalence, obesity prevalence, or mean Body Mass Index (BMI) there were published between 1 January 2016 and 31 December 2016 to update the systematic literature search previously performed as part of GBD 2015.

The search for adults was conducted on 4 January 2017 using the following terms:

```
((("Body Mass Index"[Mesh] OR "Overweight"[Mesh] OR "Obesity"[Mesh]) AND ("Geographic Locations"[Mesh] NOT "United States"[Mesh]) AND ("humans"[Mesh] AND "adult"[MeSH]) AND ("Data Collection"[Mesh] OR "Health Services Research"[Mesh] OR "Population Surveillance"[Mesh] OR "Vital statistics"[Mesh] OR "Population"[Mesh] OR "Epidemiology"[Mesh] OR "surve*" [TiAb]) NOT (Comment[ptyp] OR Case Reports[ptyp] OR "hospital"[TiAb])) AND ("2016/01/01"[Date - Publication] : "2016/12/31"[Date - Publication]))
```

The search for children was conducted on 4 August 2016 using the following terms:

```
((("Body Mass Index"[Mesh] OR "Overweight"[Mesh] OR "Obesity"[Mesh]) AND ("Geographic Locations"[Mesh] NOT "United States"[Mesh]) AND ("humans"[Mesh] AND "child"[MeSH]) AND ("Data Collection"[Mesh] OR "Health Services Research"[Mesh] OR "Population Surveillance"[Mesh] OR "Vital statistics"[Mesh] OR "Population"[Mesh] OR "Epidemiology"[Mesh] OR "surve*" [TiAb]) NOT (Comment[ptyp] OR Case Reports[ptyp] OR "hospital"[TiAb])) AND ("2016/01/01"[Date - Publication] : "2016/12/31"[Date - Publication]))
```

Our search for adult estimates identified 456 abstracts, of which 25 met inclusion criteria and were extracted. The search for children estimates identified 137 articles, of which 4 were extracted. Including sources from the previous GBD systematic literature searches, a total of 11,220 articles were identified, of which 845 were included. Additionally, we searched the Global Health Data Exchange (GHDx) database for individual-level data from major multinational survey series or country-specific surveys and identified 5,385 location-year sources meeting the inclusion criteria.

### Eligibility Criteria

We included representative studies providing data on mean BMI or prevalence of overweight or obesity among adults or children. For adults, studies were included if they defined overweight as BMI $\geq$ 25 kg/m<sup>2</sup> and obesity as BMI $\geq$ 30 kg/m<sup>2</sup>, or if estimates using those cutoffs could be back-calculated from reported categories. For children (children ages 2-18), studies were included if they used International Obesity Task Force (IOTF) standards to define overweight and obesity thresholds. We only included studies reporting data collected between 1 January 1980 and 31 December 2016. Studies were excluded if using non-random samples (e.g., case-control studies or convenience samples); conducted among specific subpopulations (e.g., pregnant women, racial or ethnic minorities, immigrants, or individuals with specific diseases); using alternative methods to assess adiposity (e.g., waist-circumference, skin-fold thickness, or hydrodensitometry); having sample sizes of less than 20 per age-sex group; or providing inadequate

information on any of the inclusion criteria. We also excluded review articles and non-English language articles.

### Data collection process

Where individual-level survey data were available, we computed mean BMI using weight and height and then used BMI to determine the prevalence of overweight and obesity. For individuals aged over 18 years, we considered them to be overweight if their BMI was greater than or equal to 25 kg/m<sup>2</sup>, and obese if their BMI was greater than or equal to 30 kg/m<sup>2</sup>. For individuals aged 2-18 years, we used monthly IOTF cutoffs<sup>2</sup> to determine overweight and obese status when age in months was available. When only age in years was available, we used the cutoff for the 6 month of that year. Individuals who were obese were also considered to be overweight. We excluded studies using the World Health Organization (WHO) standards or country-specific cutoffs to define childhood overweight and obesity. At the individual-level, we considered BMI < 10 kg/m<sup>2</sup> and BMI > 70 kg/m<sup>2</sup> to be biologically implausible and excluded those observations.

The rationale for choosing to use the IOTF cutoffs over the WHO standards has been described elsewhere. Briefly, the IOTF cutoffs provide consistent child-specific standards for ages 2-18 derived surveys covering multiple countries. On the other hand, the WHO growth standards apply to children under 5 and the WHO growth reference applies to children ages 5-19. The WHO growth reference for children ages 5-19 was derived from United States data which is less representative than the multinational data used by IOTF. Additionally, the switch between references at age 5 can produce artificial discontinuities. Given that we estimate global childhood overweight and obesity for ages 2-19 (with ages 19 using standard adult cutoffs), the IOTF cutoffs were preferable. Additionally, we found that IOTF cutoffs were more commonly used in scientific literature covering childhood obesity.

From report and literature data, we extracted data on mean BMI, prevalence of overweight, and prevalence of obesity, measures of uncertainty for each, and sample size, by the most granular age and sex groups available. Additionally, we extracted the same study-level covariates as were extracted from microdata (measurement, urbanicity, and representativeness), as well as location and year.

In addition to the primary indicators described above, we extracted relevant survey-design variables, including primary sampling unit, strata, and survey weights, which were used to tabulate individual-level microdata and produce accurate measures of uncertainty. We extracted three study-level covariates: 1) whether height and weight data were measured or self-reported, 2) whether the study was predominantly conducted in an urban area, rural area, or both, and 3) the level of representativeness of the study (national or subnational).

Finally, we extracted relevant demographic indicators, including location, year, age, and sex. We estimated the standard error of the mean from individual-level data where available and used the reported standard error of the mean for published data. When multiple data sources were available for the same country, we included all of them in our analysis. If data from the same data source were available in multiple formats such individual-level data and tabulated data, we used individual-level data.

### Self-report bias adjustment

We included both measured and self-reported data. Of 72.6 million person-years of data, 18.8 million (26%) were self-reported. We tested for bias in self-report data compared to measured data, which is considered to be the gold-standard. There was no clear direction of bias for children ages 2-14, so for

these age groups we only included measured data. For individuals ages 15+, we adjusted self-reported data for overweight prevalence, obesity prevalence, and mean BMI using the following nested hierarchical mixed-effects regression models, fit using restricted maximum likelihood separately by sex:

$$\begin{aligned} \text{logit(overweight)}_{c,a,t} &= \beta_0 + \beta_1 m + \sum_{k=2}^{19} \beta_k I_{A[a]} + \sum_{l=20}^{55} \beta_l I_{A[a]} I_{M[m]} + \alpha_s + \alpha_s m + \alpha_r + \alpha_r m + \alpha_c + \alpha_c m + \alpha_t + \alpha_t m + \epsilon_{c,a,t} \\ \text{logit(obesity)}_{c,a,t} &= \beta_0 + \beta_1 m + \sum_{k=2}^{19} \beta_k I_{A[a]} + \sum_{l=20}^{55} \beta_l I_{A[a]} I_{M[m]} + \alpha_s + \alpha_s m + \alpha_r + \alpha_r m + \alpha_c + \alpha_c m + \alpha_t + \alpha_t m + \epsilon_{c,a,t} \\ \text{log(BMI)}_{c,a,t} &= \beta_0 + \beta_1 m + \sum_{k=2}^{19} \beta_k I_{A[a]} + \sum_{l=20}^{55} \beta_l I_{A[a]} I_{M[m]} + \alpha_s + \alpha_s m + \alpha_r + \alpha_r m + \alpha_c + \alpha_c m + \alpha_t + \alpha_t m + \epsilon_{c,a,t} \end{aligned}$$

Where  $m$  is a fixed effect on measurement (binary, either measured (1) or self-report (0)),  $I_{A[a]}$  is an indicator variable for specific age group  $A$ ,  $I_{A[a]} I_{M[m]}$  is an interaction term between age and measurement,  $\alpha_s$ ,  $\alpha_r$ , and  $\alpha_c$  are random effects at the super region, region, and country, respectively, and  $\alpha_t$  is a random effect by time-period (1980-1989, 1990-1999, 2000-2009, 2010-2016). Random effects at the country level and time-period level were used to fit the models, but were taken as noise and were not used in adjustment of self-reported data. We propagated the uncertainty in the self-report adjustment model by adding the variance of each of the regression coefficients used in adjustment to the data variance in delta-transformed space. After adjustment, regressions confirmed that self-reported data was no longer significantly different from measured data.

### Age and sex splitting

Any report or literature data provided in age groups wider than the standard 5-year age groups or as both sexes combined were split using the approach used by Ng et al.<sup>1</sup> Briefly, age-sex patterns were identified using sources with data on multiple age-sex groups and these patterns were applied to split aggregated report and literature data. Uncertainty in the age-sex split was propagated by multiplying the standard error of the data by the square root of the number of splits performed. We did not propagate the uncertainty in the age pattern and sex pattern used to split the data as they seemed to have small effect.

### Prevalence estimation for overweight and obesity

After adjusting for self-report bias and splitting aggregated data into 5-year age-sex groups, we used spatiotemporal Gaussian process regression (ST-GPR) to estimate the prevalence of overweight and obesity. This modeling approach has been described in detail elsewhere.

The linear model, which when added to the smoothed residuals forms the mean prior for GPR is as follows:

$$\begin{aligned} \text{logit(overweight)}_{c,a,t} &= \beta_0 + \beta_1 \text{energy}_{c,t} + \beta_2 \text{SDI}_{c,t} + \beta_3 \text{vehicles}_{c,t} + \beta_4 \text{agriculture}_{c,t} + \sum_{k=5}^{21} \beta_k I_{A[a]} + \alpha_s + \alpha_r + \alpha_c \\ \text{logit(obesity/overweight)}_{c,a,t} &= \beta_0 + \beta_1 \text{energy}_{c,t} + \beta_2 \text{SDI}_{c,t} + \beta_3 \text{vehicles}_{c,t} + \sum_{k=4}^{21} \beta_k I_{A[a]} + \alpha_s + \alpha_r + \alpha_c + \end{aligned}$$

where energy is ten-year lag-distributed energy consumption per capita, SDI is a composite index of development including lag-distributed income per capita, education, and fertility, vehicles is the number of two or four-wheel vehicles per capita, and agriculture is the proportion of the population working in agriculture.  $I_{A[a]}$  is a dummy variable indicating specific age group  $A$  that the prevalence point captures, and  $\alpha_s$ ,  $\alpha_r$ , and  $\alpha_c$  are super region,



region, and country random intercepts, respectively. Random effects were used in model fitting but were not used in prediction.

We tested all combinations of the following covariates to see which performed best in terms of in-sample AIC for the overweight linear model and the obesity as a proportion of overweight linear model: ten-year lag distributed energy per capita, proportion of the population living in urban areas, SDI, lag-distributed income per capita, educational attainment (years) per capita, proportion of the population working in agriculture, grams of sugar adjusted for energy per capita, grams of sugar not adjusted for energy per capita, and the number of two or four-wheeled vehicles per capita. We selected these candidate covariates based on theory as well as reviewing covariates used in other publications. The final linear model was selected based on: 1) if the direction of covariates matched what is expected from theory, 2) all the included covariates were significant, and 3) minimizing in-sample AIC. The covariate selection process was performed using the dredge package in R.

We used different space weights by data density category: locations with 0-4 years covered by data used a space weight of 0.7, locations with 5-9 years covered by data used a space weight of 0.9, locations with 10-19 years covered by data used a space weight of 0.95, and locations with more than 20 years covered by data used a space weight of 0.99. The other parameters were consistent across data-density levels: age weight = 1.2 for overweight and age weight = 1.4 for obesity, time weight = 1, and scale = 10. The GPR amplitude was calculated at the region level.

### Estimating mean BMI

To estimate the mean BMI for adults in each country, age, sex, and time period 1980-2016, we first used the following nested hierarchical mixed-effects model, fit using restricted maximum likelihood on data from sources containing estimates of all three indicators (prevalence of overweight, prevalence of obesity, and mean BMI), in order to characterize the relationship between overweight, obesity, and mean BMI:

$$\log(\text{BMI}_{c,a,s,t}) = \beta_0 + \beta_1 \text{ow}_{c,a,s,t} + \beta_2 \text{ob}_{c,a,s,t} + \beta_3 \text{sex} + \sum_{k=4}^{20} \beta_k I_{A[a]} + \alpha_s(1 + \text{ow}_{c,a,s,t} + \text{ob}_{c,a,s,t}) + \alpha_r(1 + \text{ow}_{c,a,s,t} + \text{ob}_{c,a,s,t}) + \alpha_c(1 + \text{ow}_{c,a,s,t} + \text{ob}_{c,a,s,t}) + \epsilon_{c,a,s,t}$$

where  $\text{ow}_{c,a,s,t}$  is the prevalence of overweight in country  $c$ , age  $a$ , sex  $s$ , and year  $t$ ,  $\text{ob}_{c,a,s,t}$  is the prevalence of obesity in country  $c$ , age  $a$ , sex  $s$ , and year  $t$ ,  $\text{sex}$  is a fixed effect on sex,  $I_{A[a]}$  is an indicator variable for age, and  $\alpha_s$ ,  $\alpha_r$ , and  $\alpha_c$  are random effects at the super region, region, and country, respectively. The model was run in Stata 13.

We applied 1,000 draws of the regression coefficients to the 1,000 draws of overweight prevalence and obesity prevalence produced through ST-GPR to estimate 1,000 draws of mean BMI for each country, year, age, and sex. This approach ensured that overweight prevalence, obesity prevalence, and mean BMI were correlated at the draw level and uncertainty was propagated.

### Estimating BMI distribution

We used the ensemble distribution approach described in the manuscript. We fit ensemble weights by source and sex, with source- and sex-specific weights averaged across all sources included to produce the final global weights. The ensemble weights were fit on measured microdata. The final ensemble weights were: exponential = 0.002, gamma = 0.028, inverse gamma = 0.085, log logistic = 0.187, gumbel = 0.220, inverse Weibull = 0.141, Weibull = 0.011, lognormal = 0.058, normal = 0.012, beta = 0.136, mirror gamma = 0.008, and mirror gumbel = 0.113.

One thousand draws of BMI distributions for each location, year, age group, and sex estimated were produced by fitting an ensemble distribution using 1,000 draws of estimated mean BMI, 1,000 draws of estimated standard deviation, and the ensemble weights. Estimated standard deviation was produced by optimizing a standard deviation to fit estimated overweight prevalence draws and estimated obesity prevalence draws.

### Assessment of risk-outcome pairs

Risk-outcome pairs were defined based on strength of available evidence supporting a causal effect. We performed a systematic review of published meta-analyses, pooled analyses, and systematic reviews available through PubMed using the following search string: ("Body Mass Index"[Mesh] OR "Overweight"[Mesh] OR "Obesity"[Mesh]) AND (Meta-Analysis[ptyp] OR "systematic review"[tiab] OR "pooled analysis"[tiab]). Inclusion criteria are 1) the health outcome is included in GBD, 2) at least one prospective cohort is included, and 3) that the summary effect size is statistically significant. For outcomes meeting inclusion criteria we completed causal criteria tables to evaluate the strength of evidence supporting a causal relationship. Table X reports the results of our assessment for included risk-outcome pairs and Table X reports the supporting scientific literature. As a result of this effort we expanded the number of risk-outcome pairs to include a total of 38 outcomes. Gallbladder disease, cataract, multiple myeloma, gout, non-Hodgkin lymphoma, asthma, Alzheimer disease, and atrial fibrillation were added as new outcomes for GBD 2016.

### Theoretical minimum risk exposure level

For adults (ages 20+), the theoretical minimum risk exposure level (TMREL) of BMI (20-25 kg/m<sup>2</sup>) was determined based on the BMI level that was associated with the lowest risk of all-cause mortality in prospective cohort studies.<sup>2</sup>

For children (ages 2-19), the TMREL is “normal weight”, that is, not overweight or obese, based on IOTF cutoffs.

### Relative risk

The relative risk per 5-unit change in BMI for each disease endpoint was obtained from meta-analyses, and where available, pooled analyses of prospective observational studies. In cases where a relative risk per 5-unit change in BMI was not available we computed our own dose-response meta-analysis using two-step generalized least squares for time trends estimation methods.

For childhood outcomes (ages 2-19), we computed categorical relative risks for overweight and obesity using a random effects meta-analysis.

Relative risks for all 38 outcomes, by age and sex, are reported in Table X.

### References

- 1.) Ng M, Fleming T, Robinson M, et al. Global, regional, and national prevalence of overweight and obesity in children and adults during 1980–2013: a systematic analysis for the Global Burden of Disease Study 2013. *The Lancet* 2014; 384: 766–81.

- 2.) Angelantonio ED, Bhupathiraju SN, Wormser D, et al. Body-mass index and all-cause mortality: individual-participant-data meta-analysis of 239 prospective studies in four continents. *The Lancet* 2016; 388: 776–86.

# Bone Mineral Density Capstone Appendix

## Flowchart

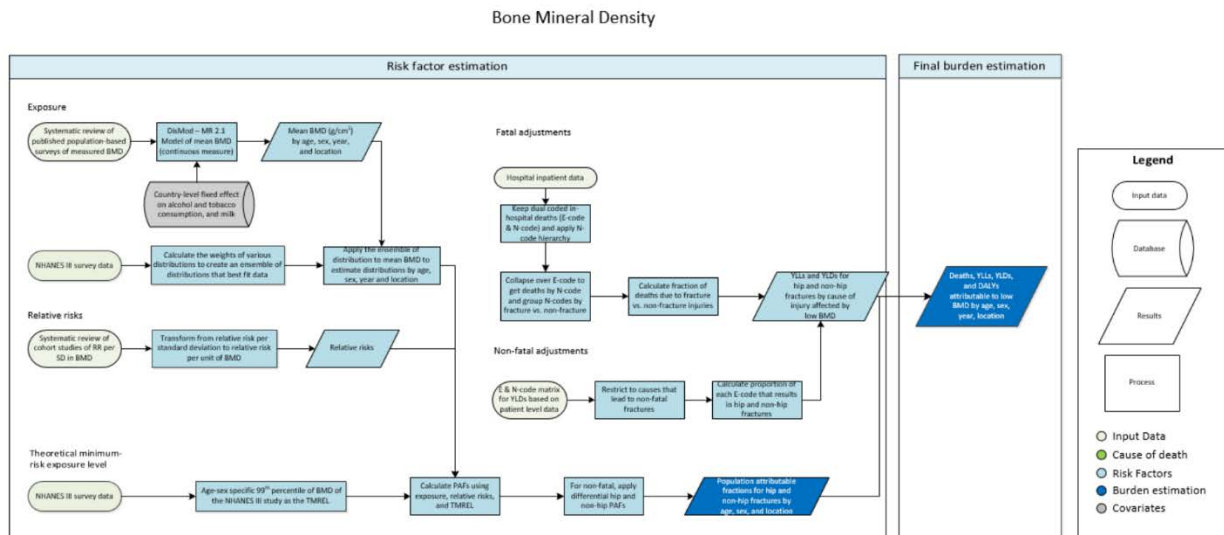

## Input Data & Methodological Summary

### Exposure

#### Case Definition

Bone mineral density (BMD) is a continuous variable measured by dual-x-ray-absorptiometry (DXA) at the femoral neck (FN) and is presented in g/cm<sup>2</sup> after standardizing for the brand of densitometer (sBMD). Low BMD is measured in terms of the difference between BMD of a population and the 99<sup>th</sup> percentile of a reference population at the same age and sex (theoretical minimum of risk exposure level, TMREL). The burden attributed to low bone mineral density is estimated for adults 20 years and older.

For estimating burden, we need to estimate:

**Exposure:** mean and standard deviation (SD) of BMD standardized for the brand of densitometer for each country and all subnational locations included in GBD.

**Risk of osteoporotic outcomes, i.e. fractures, in people exposed to low BMD relative to people who have BMD equal or greater than the TMREL.** We consider the risk of fatal and non-fatal outcomes for hip non-hip fractures, separately, as relative risk data provide different estimates. These osteoporotic non-hip fractures include fractures of vertebrae, clavicle, scapula, humerus, skull, sternum, rib, face bone, radius or ulna, femur, patella, tibia, fibula, ankle, pelvis and vertebra.

### Input data

A systematic review (search string at the end of document) was conducted in GBD 2015 but it was not scheduled for systematic review in GBD 2016. Inclusion criteria that informed the search are:

- Representative, population-based surveys
- Reporting of quantitative BMD

- measured by DXA
- performed at the FN region
- measured in g/cm<sup>2</sup>

Mean BMD was occasionally reported in stratified groups, e.g. by fracture status but not for total sample. In these cases, the stratified means were aggregated to obtain a total mean BMD at population level for an age or sex category.

The data availability by GBD super-region is shown in below table.

| Super region                                     | The number of data points |
|--------------------------------------------------|---------------------------|
| Southeast Asia, East Asia, and Oceania           | 314                       |
| Central Europe, Eastern Europe, and Central Asia | 36                        |
| High-income                                      | 682                       |
| Latin America and Caribbean                      | 97                        |
| North Africa and Middle East                     | 110                       |
| South Asia                                       | 39                        |
| Sub-Saharan Africa                               | 3                         |

### Modeling strategy

We modeled mean BMD in DisMod-MR 2.1 as a single ‘continuous’ parameter model by age and sex, and all GBD locations for years 1990 to 2016. The model had age mesh points at 0 10 20 25 30 40 50 60 70 80 90 & 100, a time window of 10 years for fitting data, and a minimum coefficient of variation of 0.1 for global, 0.06 super region and 0.04 for the region level.

The country covariates of alcohol consumption (litres per capita), tobacco consumption (cigarettes per capita) and adjusted calcium intake (g) were included in modelling. The country covariates of BMI and milk consumption did not have a significant effect on BMD so we excluded them from our final model.

The uncertainty of BMD was modeled using a new approach. Various distributions were tested for goodness-of-fit in NHANES III data, the only survey for which we had unit record data available. We applied a weighting ensemble on those distributions. The weights were calculated in an optimization model with an objective function that minimized Kolmogorov-Smirnov statistics. The weights of the distributions in the ensemble were calculated separately for males and females, and for ages below and above 70. Distribution weights are shown below.

| sex    | age (years) | gamma | gumbel | inverse weibull | weibull | log normal | normal | mirrored gamma | mirrored gumbel |
|--------|-------------|-------|--------|-----------------|---------|------------|--------|----------------|-----------------|
| male   | < 70        | 0.03  | 0.01   | 0.28            | 0.00    | 0.20       | 0.35   | 0.06           | 0.07            |
| male   | >= 70       | 0.24  | 0.21   | 0.06            | 0.00    | 0.21       | 0.01   | 0.00           | 0.27            |
| female | < 70        | 0.03  | 0.06   | 0.01            | 0.06    | 0.49       | 0.02   | 0.00           | 0.32            |
| female | >= 70       | 0.00  | 0.00   | 0.42            | 0.00    | 0.12       | 0.44   | 0.00           | 0.01            |

There were various modelling steps after DisMod-MR 2.1 modelling of exposure to arrive at attributable fractions that can be applied to fatal and non-fatal fracture outcomes. First, we calculated the

proportion of injury deaths that are due to fractures. This proportion of death caused by fracture is the envelope that we use to attribute death to BMD. In order to do this, we assumed that hip fracture and some non-hip fractures (any fractures apart from fingers and toes) are potentially fatal fractures. As cause of death data from vital registrations and verbal autopsy attributed injury deaths to causes of death (e.g. fall or road injury) and not nature of injury (such as fractures), we turned to available hospital data to estimate the proportion of injury deaths during admission that could be ascribed to fractures. We restricted our analysis to cases that were dual-coded with both the cause of injury (“E-code”) and nature of injury (“N-code”). As injury cases may have multiple forms of trauma, we applied a severity hierarchy to the fatal hospital data to determine the proportion of the deaths that could be attributed to the chosen fracture types but were not accompanied by more severe fatal trauma such as head trauma, spinal cord lesion, and intra-abdominal or thoracic organ damage. We collapsed all deaths over E-code to determine the ratio of deaths attributable to fracture versus non-fracture injuries. We applied this ratio to the YLL.

We restricted non-fatal estimates of low BMD to a list of causes that were deemed to cause osteoporotic fractures. Below is the list of injuries for which a PAF was calculated:

- Transport injuries
- Road injuries
- Pedestrian road injuries
- Cyclist road injuries
- Motorcyclist road injuries
- Motor vehicle road injuries
- Other road injuries
- Other transport injuries
- Unintentional injuries
- Falls
- Exposure to mechanical forces
- Other exposure to mechanical forces
- Non-venomous animal contact
- Interpersonal violence
- Assault by other means
- Exposure to forces of nature

We made use of the E to N-code matrix generated from dual-coded (E-code/N-code) patient level data in our injury analyses to determine the proportion of each E-code that results in a certain N-code. The hip and non-hip fracture population attributable fractions (as explained below) were applied to the appropriate combinations of external cause and fracture estimates of YLD.

### [Theoretical minimum-risk exposure level](#)

The theoretical minimum of risk exposure level or TMREL was chosen as the age-sex specific 99<sup>th</sup> percentile of BMD of the NHANES III study as the reference population.

## Relative risks

Relative risks must be reported per standard deviation or per unit bone mass density in order for us to use the data. Many studies report relative risk based on a z-score or the relative risks in the osteoporotic group versus the non-osteoporotic group; neither of these relative risks are usable.

For GBD 2016, we did not update the systematic review for the RR of BMD that was done in GBD 2013, from which twelve prospective observational studies were found but one meta-analysis of 12 studies (Johnell et al. 2005) reported the dose-response relationship between low BMD and high relative risk of hip and other fractures that are prone to osteoporosis, as shown in the below table.

| <i>BMD</i><br><i>z score</i> | <i>Any fracture</i> |               | <i>Osteoporotic fracture</i> |               | <i>Hip fracture</i> |               |
|------------------------------|---------------------|---------------|------------------------------|---------------|---------------------|---------------|
|                              | <i>RR</i>           | <i>95% CI</i> | <i>RR</i>                    | <i>95% CI</i> | <i>RR</i>           | <i>95% CI</i> |
| -4                           | 1.79                | 1.44–2.23     | 2.10                         | 1.63–2.71     | 2.14                | 1.40–3.26     |
| -3                           | 1.71                | 1.44–2.02     | 1.96                         | 1.61–2.39     | 2.12                | 1.54–2.92     |
| -2                           | 1.63                | 1.45–1.84     | 1.84                         | 1.60–2.12     | 2.11                | 1.70–2.62     |
| -1                           | 1.56                | 1.45–1.69     | 1.73                         | 1.59–1.89     | 2.11                | 1.86–2.39     |
| 0                            | 1.50                | 1.44–1.56     | 1.62                         | 1.54–1.71     | 2.08                | 1.91–2.26     |
| 1                            | 1.39                | 1.32–1.46     | 1.42                         | 1.34–1.51     | 2.04                | 1.78–2.34     |
| 2                            | 1.32                | 1.21–1.45     | 1.33                         | 1.19–1.48     | 2.03                | 1.60–2.56     |
| 3                            | 1.26                | 1.10–1.45     | 1.25                         | 1.06–1.47     | 2.01                | 1.44–2.81     |
| 4                            | 1.21                | 1.00–1.45     | 1.17                         | 0.93–1.46     | 1.99                | 1.28–3.10     |

The z score ranged from -5.1 to +5.8.

## Reference

Johnell O, Kanis JA, Oden A, Johansson H, De Laet C, Delmas P, Eisman JA, Fujiwara S, Kroger H, Mellstrom D, Meunier PJ, Melton LJ, 3rd, O'Neill T, Pols H, Reeve J, Silman A, Tenenhouse A (2005) Predictive value of BMD for hip and other fractures. *J Bone Miner Res* 20 (7):1185-1194

Search string from GBD 2015 systematic review:

| Search | Query                                                                                                                                                                                                                                                                                                  | Items found | Time     |
|--------|--------------------------------------------------------------------------------------------------------------------------------------------------------------------------------------------------------------------------------------------------------------------------------------------------------|-------------|----------|
| #11    | Search (#8 AND #10) Filters: Humans                                                                                                                                                                                                                                                                    | 326         | 12:37:09 |
| #10    | Search ("Cross-Sectional Studies"[Mesh] OR "cross-sectional"[title/abstract] OR "Health Surveys"[Mesh] OR Survey[title/abstract] OR cohort[title/abstract] OR "Diet Surveys"[Mesh] OR "Longitudinal Studies"[Mesh] OR "Nutrition Surveys"[Mesh] OR "Surveys and Questionnaires"[Mesh]) Filters: Humans | 1324376     | 12:36:29 |
| #8     | Search (#7 AND #6) Filters: Humans                                                                                                                                                                                                                                                                     | 622         | 12:33:16 |
| #7     | Search ("Absorptiometry, Photon"[Mesh] OR "dual-energy x-ray absorptiometry" OR "dual energy x-ray absorptiometry") Filters: Humans                                                                                                                                                                    | 21368       | 12:32:34 |
| #6     | Search (#5 AND ("2010"[Date - Publication] : "3000"[Date - Publication])) Filters: Humans                                                                                                                                                                                                              | 1387        | 12:30:26 |
| #5     | Search ((#1 OR #2) AND #3) Filters: Humans                                                                                                                                                                                                                                                             | 3702        | 12:29:47 |
| #4     | Search ((#1 OR #2) AND #3)                                                                                                                                                                                                                                                                             | 4015        | 12:29:33 |
| #3     | Search (((("bone mineral density"[title/abstract] OR "bone mineral densities"[title/abstract]) OR "Bone Density"[Mesh]) AND (mean[title/abstract] OR average[title/abstract])))                                                                                                                        | 12892       | 12:29:00 |

|    |                                                                                                                                                                                                                                                                                                                                                                                                                                                                                                                                                                                                                                                                                                                                                                                                                                                                                                                                                                                                                                                                                                                                                                                                                                                                                                                                                                                                                                                                                                                                                                                                                                                                                                                                                                                                                                                                                                                                                                                                                                                                                                                                                                                                                                                                                                                                                                                                                                                                                                                                                                                                                                                                                                                                                                                                                                                                                                                                                                                                                                                                                                                                                                                                                                                                                                                                                                                                                                                                                                                                                                                                                                                                                                                                                                                                                                                                                                                                                                                                                                                                                                                                                                                                                                                                                                                                                                                                                                                                                                                                                                                                                                                                                                                                                                                                                                                                                                                                                                                                                                                                                                                                                                                                                                                                                                                                                                                                                                                                                                                                                                                                                                                                                                                                                                                                                                                                                                                                                                                                                                                                                                                                                                                                                                                                                                                                                                                                                                                      |         |          |
|----|------------------------------------------------------------------------------------------------------------------------------------------------------------------------------------------------------------------------------------------------------------------------------------------------------------------------------------------------------------------------------------------------------------------------------------------------------------------------------------------------------------------------------------------------------------------------------------------------------------------------------------------------------------------------------------------------------------------------------------------------------------------------------------------------------------------------------------------------------------------------------------------------------------------------------------------------------------------------------------------------------------------------------------------------------------------------------------------------------------------------------------------------------------------------------------------------------------------------------------------------------------------------------------------------------------------------------------------------------------------------------------------------------------------------------------------------------------------------------------------------------------------------------------------------------------------------------------------------------------------------------------------------------------------------------------------------------------------------------------------------------------------------------------------------------------------------------------------------------------------------------------------------------------------------------------------------------------------------------------------------------------------------------------------------------------------------------------------------------------------------------------------------------------------------------------------------------------------------------------------------------------------------------------------------------------------------------------------------------------------------------------------------------------------------------------------------------------------------------------------------------------------------------------------------------------------------------------------------------------------------------------------------------------------------------------------------------------------------------------------------------------------------------------------------------------------------------------------------------------------------------------------------------------------------------------------------------------------------------------------------------------------------------------------------------------------------------------------------------------------------------------------------------------------------------------------------------------------------------------------------------------------------------------------------------------------------------------------------------------------------------------------------------------------------------------------------------------------------------------------------------------------------------------------------------------------------------------------------------------------------------------------------------------------------------------------------------------------------------------------------------------------------------------------------------------------------------------------------------------------------------------------------------------------------------------------------------------------------------------------------------------------------------------------------------------------------------------------------------------------------------------------------------------------------------------------------------------------------------------------------------------------------------------------------------------------------------------------------------------------------------------------------------------------------------------------------------------------------------------------------------------------------------------------------------------------------------------------------------------------------------------------------------------------------------------------------------------------------------------------------------------------------------------------------------------------------------------------------------------------------------------------------------------------------------------------------------------------------------------------------------------------------------------------------------------------------------------------------------------------------------------------------------------------------------------------------------------------------------------------------------------------------------------------------------------------------------------------------------------------------------------------------------------------------------------------------------------------------------------------------------------------------------------------------------------------------------------------------------------------------------------------------------------------------------------------------------------------------------------------------------------------------------------------------------------------------------------------------------------------------------------------------------------------------------------------------------------------------------------------------------------------------------------------------------------------------------------------------------------------------------------------------------------------------------------------------------------------------------------------------------------------------------------------------------------------------------------------------------------------------------------------------------------------------------------------------------|---------|----------|
| #2 | <p>Search (((((multinational[TIAB] OR international[TIAB] OR national[TIAB] OR nationwide[TIAB] OR nation-wide[TIAB] OR equatorial[TIAB] OR equator[TIAB] OR global[TIAB] OR globe[TIAB] OR world[TIAB] OR worldwide[TIAB] OR world-wide[TIAB] OR countrywide[TIAB] OR countries[TIAB] OR continental[TIAB] OR continent[TIAB] OR continents[TIAB] OR global burden[TIAB] OR burden of disease[TIAB] OR disease burden[TIAB] OR tropic[TIAB] OR tropics[TIAB] OR tropics[TIAB] OR Oceania[TIAB] OR South America[TIAB] OR Central America[TIAB] OR Mesoamerica[TIAB] OR Americas[TIAB] OR Latin America[TIAB] OR paho[TIAB] OR pan-american[TIAB] OR panamerican[TIAB] OR pan-america[TIAB] OR Caribbean[TIAB] OR Indies[TIAB] OR Australasia[TIAB] OR Australasian[TIAB] OR developing countries[TIAB] OR developing nations[TIAB] OR developed countries[TIAB] OR developed nations[TIAB] OR commonwealth[TIAB] OR industrialized[TIAB] OR nonindustrialized[TIAB] OR non-industrialized[TIAB] OR underdeveloped countries[TIAB] OR underdeveloped nation[TIAB] OR underdeveloped nations[TIAB] OR under-developed country[TIAB] OR under-developed countries[TIAB] OR under-developed nation[TIAB] OR under-developed nations[TIAB] OR low-income country[TIAB] OR low-income countries[TIAB] OR low-income nation[TIAB] OR low-income nations[TIAB] OR nondeveloped country nation[TIAB] OR nondeveloped nations[TIAB] OR non-developed country[TIAB] OR non-developed countries[TIAB] OR non-developed nation[TIAB] OR non-developed nations[TIAB] OR International Cooperation[TIAB] OR World Health Organization[TIAB] OR Asia[TIAB] OR Far East[TIAB] OR Near East[TIAB] OR Middle East[TIAB] OR Scandinavia[TIAB] OR Europe[TIAB] OR European[TIAB] OR Eastern Hemisphere[TIAB] OR Western Hemisphere[TIAB] OR Northern Hemisphere[TIAB] OR Southern Hemisphere[TIAB] OR North America[TIAB] OR island[TIAB] OR islands[TIAB] OR United Nations[TIAB] OR unesco[TIAB] OR unicef[TIAB] OR Worldbank[TIAB] OR Benelux[TIAB] OR sub-Saharan[TIAB] OR subsaharan[TIAB] OR Sahara[TIAB] OR sub-Sahara[TIAB] OR Amazon[TIAB] OR Amazonian[TIAB] OR valley[TIAB] OR river[TIAB] OR mountain[TIAB] OR mountains[TIAB] OR forest[TIAB] OR forests[TIAB] OR rainforest[TIAB] OR rainforests[TIAB] OR jungle[TIAB] OR jungles[TIAB] OR archipelago[TIAB] OR archipelagos[TIAB] OR archipelagoes[TIAB] OR patagonia[TIAB] OR andes[TIAB] OR mediterranean region[TIAB] OR Africa[TIAB] OR registry[TIAB] OR North Korea[TIAB] OR Timor[TIAB] OR Palestine[TIAB] OR Syrian Arab Republic[TIAB] OR Baltic[TIAB] OR Atlantic Islands[TIAB] OR Indian Ocean[TIAB] OR Pacific[TIAB] OR multicenter[TIAB] OR multi-center[TIAB] OR registry[TIAB] OR registries[TIAB] OR Algeria[TIAB] OR Egypt[TIAB] OR Libya[TIAB] OR Morocco[TIAB] OR Tunisia[TIAB] OR Cameroon[TIAB] OR Central African Republic[TIAB] OR Chad[TIAB] OR Congo[TIAB] OR Congo[TIAB] OR Equatorial Guinea[TIAB] OR Gabon[TIAB] OR Burundi[TIAB] OR Djibouti[TIAB] OR Eritrea[TIAB] OR Ethiopia[TIAB] OR Kenya[TIAB] OR Rwanda[TIAB] OR Somalia[TIAB] OR Sudan[TIAB] OR Tanzania[TIAB] OR Uganda[TIAB] OR Angola[TIAB] OR Botswana[TIAB] OR Lesotho[TIAB] OR Malawi[TIAB] OR Mozambique[TIAB] OR Namibia[TIAB] OR South Africa[TIAB] OR Swaziland[TIAB] OR Zambia[TIAB] OR Zimbabwe[TIAB] OR Benin[TIAB] OR Burkina Faso[TIAB] OR Cote d'Ivoire[TIAB] OR Gambia[TIAB] OR Ghana[TIAB] OR Guinea[TIAB] OR Guinea-Bissau[TIAB] OR Liberia[TIAB] OR Mali[TIAB] OR Mauritania[TIAB] OR Niger[TIAB] OR Nigeria[TIAB] OR Senegal[TIAB] OR Sierra Leone[TIAB] OR Togo[TIAB] OR Antigua[TIAB] OR Bahamas[TIAB] OR Barbados[TIAB] OR Cuba[TIAB] OR Dominica[TIAB] OR Dominican Republic[TIAB] OR Grenada[TIAB] OR Guadeloupe[TIAB] OR Haiti[TIAB] OR Jamaica[TIAB] OR Martinique[TIAB] OR Netherlands Antilles[TIAB] OR Puerto Rico[TIAB] OR Saint Kitts and Nevis[TIAB] OR Saint Lucia[TIAB] OR Saint Vincent[TIAB] OR Grenadines[TIAB] OR Trinidad and Tobago[TIAB] OR Virgin Islands[TIAB] OR Belize[TIAB] OR Costa Rica[TIAB] OR El Salvador[TIAB] OR Guatemala[TIAB] OR Honduras[TIAB] OR Nicaragua[TIAB] OR Panama[TIAB] OR Mexico[TIAB] OR Argentina[TIAB] OR Bolivia[TIAB] OR Brazil[TIAB] OR Chile[TIAB] OR Colombia[TIAB] OR Ecuador[TIAB] OR French Guiana[TIAB] OR French Guiana[TIAB] OR Paraguay[TIAB] OR Peru[TIAB] OR Suriname[TIAB] OR Uruguay[TIAB] OR Venezuela[TIAB] OR Kazakhstan[TIAB] OR Kyrgyzstan[TIAB] OR Tajikistan[TIAB] OR Turkmenistan[TIAB] OR Uzbekistan[TIAB] OR Borneo[TIAB] OR Cambodia[TIAB] OR Timor[TIAB] OR Indonesia[TIAB] OR Laos[TIAB] OR Malaysia[TIAB] OR Mekong Valley[TIAB] OR Myanmar[TIAB] OR Philippines[TIAB] OR Thailand[TIAB] OR Vietnam[TIAB] OR Viet Nam[TIAB] OR Bangladesh[TIAB] OR Bhutan[TIAB] OR India[TIAB] OR Afghanistan[TIAB] OR Bahrain[TIAB] OR Iran[TIAB] OR Iraq[TIAB] OR Jordan[TIAB] OR Kuwait[TIAB] OR Lebanon[TIAB] OR Oman[TIAB] OR Qatar[TIAB] OR Saudi Arabia[TIAB] OR Syria[TIAB] OR Turkey[TIAB] OR United Arab Emirates[TIAB] OR Yemen[TIAB] OR Nepal[TIAB] OR Pakistan[TIAB] OR Sri Lanka[TIAB] OR China[TIAB] OR Macao[TIAB] OR Mongolia[TIAB] OR Taiwan[TIAB] OR Azores[TIAB] OR Bermuda[TIAB] OR Falkland Islands[TIAB] OR Albania[TIAB] OR Estonia[TIAB] OR Latvia[TIAB] OR Lithuania[TIAB] OR Bosnia-Herzegovina[TIAB] OR Bulgaria[TIAB] OR Byelarus[TIAB] OR Croatia[TIAB] OR Czech Republic[TIAB] OR Hungary[TIAB] OR Macedonia[TIAB] OR Moldova[TIAB] OR Montenegro[TIAB] OR Poland[TIAB] OR Romania[TIAB] OR Russia[TIAB] OR Slovakia[TIAB] OR Slovenia[TIAB] OR Ukraine[TIAB] OR Yugoslavia[TIAB] OR Armenia[TIAB] OR Azerbaijan[TIAB] OR Georgia[TIAB] OR Comoros[TIAB] OR Madagascar[TIAB] OR Mauritius[TIAB] OR Reunion[TIAB] OR Seychelles[TIAB] OR Fiji[TIAB] OR New Caledonia[TIAB] OR Papua New Guinea[TIAB] OR Vanuatu[TIAB] OR Guam[TIAB] OR Palau[TIAB] OR Pitcairn Island[TIAB] OR Samoa[TIAB] OR Tonga[TIAB] OR Czechoslovakia[TIAB] OR East Germany[TIAB] OR New Guinea[TIAB] OR USSR[TIAB] OR Yugoslavia[TIAB] OR Ivory Coast[TIAB] OR Hong Kong[TIAB] OR china[TIAB] OR North Korea[TIAB] OR Palestine[TIAB] OR Syrian Arab Republic[TIAB]) AND (hasabstract[text] AND Humans[Mesh] AND middle age[MeSH]) OR ((International Cooperation[Mesh:noexp] OR developing countries[Mesh] OR developed countries[Mesh] OR WORLD HEALTH[Mesh] OR WORLD HEALTH ORGANIZATION[Mesh] OR AFRICA[Mesh] OR</p> | 3585538 | 12:28:22 |
|----|------------------------------------------------------------------------------------------------------------------------------------------------------------------------------------------------------------------------------------------------------------------------------------------------------------------------------------------------------------------------------------------------------------------------------------------------------------------------------------------------------------------------------------------------------------------------------------------------------------------------------------------------------------------------------------------------------------------------------------------------------------------------------------------------------------------------------------------------------------------------------------------------------------------------------------------------------------------------------------------------------------------------------------------------------------------------------------------------------------------------------------------------------------------------------------------------------------------------------------------------------------------------------------------------------------------------------------------------------------------------------------------------------------------------------------------------------------------------------------------------------------------------------------------------------------------------------------------------------------------------------------------------------------------------------------------------------------------------------------------------------------------------------------------------------------------------------------------------------------------------------------------------------------------------------------------------------------------------------------------------------------------------------------------------------------------------------------------------------------------------------------------------------------------------------------------------------------------------------------------------------------------------------------------------------------------------------------------------------------------------------------------------------------------------------------------------------------------------------------------------------------------------------------------------------------------------------------------------------------------------------------------------------------------------------------------------------------------------------------------------------------------------------------------------------------------------------------------------------------------------------------------------------------------------------------------------------------------------------------------------------------------------------------------------------------------------------------------------------------------------------------------------------------------------------------------------------------------------------------------------------------------------------------------------------------------------------------------------------------------------------------------------------------------------------------------------------------------------------------------------------------------------------------------------------------------------------------------------------------------------------------------------------------------------------------------------------------------------------------------------------------------------------------------------------------------------------------------------------------------------------------------------------------------------------------------------------------------------------------------------------------------------------------------------------------------------------------------------------------------------------------------------------------------------------------------------------------------------------------------------------------------------------------------------------------------------------------------------------------------------------------------------------------------------------------------------------------------------------------------------------------------------------------------------------------------------------------------------------------------------------------------------------------------------------------------------------------------------------------------------------------------------------------------------------------------------------------------------------------------------------------------------------------------------------------------------------------------------------------------------------------------------------------------------------------------------------------------------------------------------------------------------------------------------------------------------------------------------------------------------------------------------------------------------------------------------------------------------------------------------------------------------------------------------------------------------------------------------------------------------------------------------------------------------------------------------------------------------------------------------------------------------------------------------------------------------------------------------------------------------------------------------------------------------------------------------------------------------------------------------------------------------------------------------------------------------------------------------------------------------------------------------------------------------------------------------------------------------------------------------------------------------------------------------------------------------------------------------------------------------------------------------------------------------------------------------------------------------------------------------------------------------------------------------------------------------------|---------|----------|



|    |                                                                                                                                                                                                                                                                                                                                                                                                                                                                                                                                                                                                                                                                                                                                                                                                                                                                                                                                                                                                                                                                                                                                                                                                                                                                                                                                                                                                                                                                                                                                                                                                                                                                                                                                                                                                                                                                                                                                                                                                                                                                                                                                                                                                                                                                                                                                                                                                                                                                                                                                                                                                                                                                                                                                                                                                                                                                                                                                                                                                                                                                                                                                                                                                                                                                                                                                                                                                                                                                                                                                                                                                                                                                                                                                                                                                                                                                                                                                                                                                                                                                                                                                                                                                                                                                                                                                                                                                                                        |         |          |
|----|----------------------------------------------------------------------------------------------------------------------------------------------------------------------------------------------------------------------------------------------------------------------------------------------------------------------------------------------------------------------------------------------------------------------------------------------------------------------------------------------------------------------------------------------------------------------------------------------------------------------------------------------------------------------------------------------------------------------------------------------------------------------------------------------------------------------------------------------------------------------------------------------------------------------------------------------------------------------------------------------------------------------------------------------------------------------------------------------------------------------------------------------------------------------------------------------------------------------------------------------------------------------------------------------------------------------------------------------------------------------------------------------------------------------------------------------------------------------------------------------------------------------------------------------------------------------------------------------------------------------------------------------------------------------------------------------------------------------------------------------------------------------------------------------------------------------------------------------------------------------------------------------------------------------------------------------------------------------------------------------------------------------------------------------------------------------------------------------------------------------------------------------------------------------------------------------------------------------------------------------------------------------------------------------------------------------------------------------------------------------------------------------------------------------------------------------------------------------------------------------------------------------------------------------------------------------------------------------------------------------------------------------------------------------------------------------------------------------------------------------------------------------------------------------------------------------------------------------------------------------------------------------------------------------------------------------------------------------------------------------------------------------------------------------------------------------------------------------------------------------------------------------------------------------------------------------------------------------------------------------------------------------------------------------------------------------------------------------------------------------------------------------------------------------------------------------------------------------------------------------------------------------------------------------------------------------------------------------------------------------------------------------------------------------------------------------------------------------------------------------------------------------------------------------------------------------------------------------------------------------------------------------------------------------------------------------------------------------------------------------------------------------------------------------------------------------------------------------------------------------------------------------------------------------------------------------------------------------------------------------------------------------------------------------------------------------------------------------------------------------------------------------------------------------------------------|---------|----------|
|    | <p>Americas[Mesh:noexp] OR Caribbean Region[Mesh] OR West Indies[Mesh] OR Central America[Mesh] OR Latin America[Mesh:noexp] OR North America[Mesh:noexp] OR South America[Mesh] OR Antarctic Regions[Mesh:noexp] OR Arctic Regions[Mesh:noexp] OR Asia[Mesh:noexp] OR Asia, Central[Mesh] OR Asia, Southeastern[Mesh:noexp] OR Asia, Western[Mesh:noexp] OR Middle East[Mesh:noexp] OR Far East[Mesh:noexp] OR Atlantic Islands[Mesh] OR Europe[Mesh:noexp] OR Europe, Eastern[Mesh] OR Scandinavia[Mesh:noexp] OR Transcaucasia[Mesh] OR Indian Ocean Islands[Mesh] OR Oceania[Mesh:noexp] OR Australasia[Mesh:noexp] OR Pacific Islands[Mesh:noexp] OR Melanesia[Mesh:noexp] OR Micronesia[Mesh:noexp] OR Polynesia[Mesh:noexp] OR Mexico[Mesh] OR Borneo[Mesh] OR Cambodia[Mesh] OR East Timor[Mesh] OR Indonesia[Mesh] OR Laos[Mesh] OR Malaysia[Mesh] OR Mekong Valley[Mesh] OR Myanmar[Mesh] OR Philippines[Mesh] OR Thailand[Mesh] OR Vietnam[Mesh] OR Bangladesh[Mesh] OR Bhutan[Mesh] OR India[Mesh] OR Afghanistan[Mesh] OR Bahrain[Mesh] OR Iran[Mesh] OR Iraq[Mesh] OR Jordan[Mesh] OR Kuwait[Mesh] OR Lebanon[Mesh] OR Oman[Mesh] OR Qatar[Mesh] OR Saudi Arabia[Mesh] OR Syria[Mesh] OR Turkey[Mesh] OR United Arab Emirates[Mesh] OR Yemen[Mesh] OR Nepal[Mesh] OR Pakistan[Mesh] OR Sri Lanka[Mesh] OR China[Mesh] OR Macao[Mesh] OR Mongolia[Mesh] OR Taiwan[Mesh] OR Multicenter Studies As Topic[Mesh] OR Multicenter Study[PT] OR Algeria[PL] OR Egypt[PL] OR Libya[PL] OR Morocco[PL] OR Tunisia[PL] OR Cameroon[PL] OR Central African Republic[PL] OR Chad[PL] OR Congo[PL] OR Congo[PL] OR Equatorial Guinea[PL] OR Gabon[PL] OR Burundi[PL] OR Djibouti[PL] OR Eritrea[PL] OR Ethiopia[PL] OR Kenya[PL] OR Rwanda[PL] OR Somalia[PL] OR Sudan[PL] OR Tanzania[PL] OR Uganda[PL] OR Angola[PL] OR Botswana[PL] OR Lesotho[PL] OR Malawi[PL] OR Mozambique[PL] OR Namibia[PL] OR South Africa[PL] OR Swaziland[PL] OR Zambia[PL] OR Zimbabwe[PL] OR Benin[PL] OR Burkina Faso[PL] OR Cote d'Ivoire[PL] OR Gambia[PL] OR Ghana[PL] OR Guinea[PL] OR Guinea-Bissau[PL] OR Liberia[PL] OR Mali[PL] OR Mauritania[PL] OR Niger[PL] OR Nigeria[PL] OR Senegal[PL] OR Sierra Leone[PL] OR Togo[PL] OR Antigua[PL] OR Bahamas[PL] OR Barbados[PL] OR Cuba[PL] OR Dominica[PL] OR Dominican Republic[PL] OR Grenada[PL] OR Guadeloupe[PL] OR Haiti[PL] OR Jamaica[PL] OR Martinique[PL] OR Netherlands Antilles[PL] OR Puerto Rico[PL] OR Saint Kitts and Nevis[PL] OR Saint Lucia[PL] OR Saint Vincent[PL] OR Grenadines[PL] OR Trinidad and Tobago[PL] OR Virgin Islands[PL] OR Belize[PL] OR Costa Rica[PL] OR El Salvador[PL] OR Guatemala[PL] OR Honduras[PL] OR Nicaragua[PL] OR Panama[PL] OR Mexico[PL] OR Argentina[PL] OR Bolivia[PL] OR Brazil[PL] OR Chile[PL] OR Colombia[PL] OR Ecuador[PL] OR French Guiana[PL] OR French Guiana[PL] OR Paraguay[PL] OR Peru[PL] OR Suriname[PL] OR Uruguay[PL] OR Venezuela[PL] OR Kazakhstan[PL] OR Kyrgyzstan[PL] OR Tajikistan[PL] OR Turkmenistan[PL] OR Uzbekistan[PL] OR Borneo[PL] OR Cambodia[PL] OR East Timor[PL] OR Indonesia[PL] OR Laos[PL] OR Malaysia[PL] OR Mekong Valley[PL] OR Myanmar[PL] OR Philippines[PL] OR Thailand[PL] OR Vietnam[PL] OR Bangladesh[PL] OR Bhutan[PL] OR India[PL] OR Afghanistan[PL] OR Bahrain[PL] OR Iran[PL] OR Iraq[PL] OR Jordan[PL] OR Kuwait[PL] OR Lebanon[PL] OR Oman[PL] OR Qatar[PL] OR Saudi Arabia[PL] OR Syria[PL] OR Turkey[PL] OR United Arab Emirates[PL] OR Yemen[PL] OR Nepal[PL] OR Pakistan[PL] OR Sri Lanka[PL] OR China[PL] OR Macao[PL] OR Mongolia[PL] OR Taiwan[PL] OR Azores[PL] OR Bermuda[PL] OR Falkland Islands[PL] OR Albania[PL] OR Estonia[PL] OR Latvia[PL] OR Lithuania[PL] OR Bosnia-Herzegovina[PL] OR Bulgaria[PL] OR Byelarus[PL] OR Croatia[PL] OR Czech Republic[PL] OR Hungary[PL] OR Macedonia[PL] OR Moldova[PL] OR Montenegro[PL] OR Poland[PL] OR Romania[PL] OR Russia[PL] OR Slovakia[PL] OR Slovenia[PL] OR Ukraine[PL] OR Armenia[PL] OR Azerbaijan[PL] OR Georgia[PL] OR Comoros[PL] OR Madagascar[PL] OR Mauritius[PL] OR Reunion[PL] OR Seychelles[PL] OR Fiji[PL] OR New Caledonia[PL] OR Papua New Guinea[PL] OR Vanuatu[PL] OR Guam[PL] OR Palau[PL] OR Pitcairn Island[PL] OR Samoa[PL] OR Tonga[PL] OR Czechoslovakia[PL] OR Germany, East[PL] OR New Guinea[PL] OR USSR[PL] OR Yugoslavia[PL] OR Ivory Coast[PL] OR Hong Kong[PL] OR republic of china[PL]))</p> |         |          |
| #1 | <p>Search ((Canada[Mesh] OR Greenland[Mesh] OR United States[Mesh] OR Brunei[Mesh] OR Singapore[Mesh] OR Israel[Mesh] OR Japan[Mesh] OR Korea[Mesh] OR Australia[Mesh] OR Andorra[Mesh] OR Austria[Mesh] OR Belgium[Mesh] OR Finland[Mesh] OR France[Mesh] OR Germany[Mesh] OR Gibraltar[Mesh] OR Great Britain[Mesh] OR Greece[Mesh] OR Iceland[Mesh] OR Ireland[Mesh] OR Italy[Mesh] OR Liechtenstein[Mesh] OR Luxembourg[Mesh] OR Mediterranean Region[Mesh] OR Monaco[Mesh] OR Netherlands[Mesh] OR Portugal[Mesh] OR San Marino[Mesh] OR Scandinavia[Mesh] OR Spain[Mesh] OR Switzerland[Mesh] OR Vatican City[Mesh] OR Australia[Mesh] OR New Zealand[Mesh] OR Brunei[TIAB] OR Japan[TIAB] OR South Korea[TIAB] OR Singapore[TIAB] OR Andorra[TIAB] OR Austria[TIAB] OR Belgium[TIAB] OR Cyprus[TIAB] OR Denmark[TIAB] OR Finland[TIAB] OR France[TIAB] OR Germany[TIAB] OR Gibraltar[TIAB] OR Greece[TIAB] OR Greenland[TIAB] OR Vatican[TIAB] OR Iceland[TIAB] OR Ireland[TIAB] OR Israel[TIAB] OR Italy[TIAB] OR Liechtenstein[TIAB] OR Luxembourg[TIAB] OR Malta[TIAB] OR Monaco[TIAB] OR Netherlands[TIAB] OR Norway[TIAB] OR Portugal[TIAB] OR San Marino[TIAB] OR Spain[TIAB] OR Sweden[TIAB] OR Switzerland[TIAB] OR United Kingdom[TIAB] OR England[TIAB] OR Wales[TIAB] OR Scotland[TIAB] OR Canada[TIAB] OR United States[TIAB] OR Australia[TIAB] OR New Zealand[TIAB]))</p>                                                                                                                                                                                                                                                                                                                                                                                                                                                                                                                                                                                                                                                                                                                                                                                                                                                                                                                                                                                                                                                                                                                                                                                                                                                                                                                                                                                                                                                                                                                                                                                                                                                                                                                                                                                                                                                                                                                                                                                                                                                                                                                                                                                                                                                                                                                                                                                                                                                                                                                                                                                                                                                                                                                                                                                                                                                                                                                                                                                                                                         | 3182449 | 12:27:20 |

# Impaired Kidney Function Capstone Appendix

## Flowchart

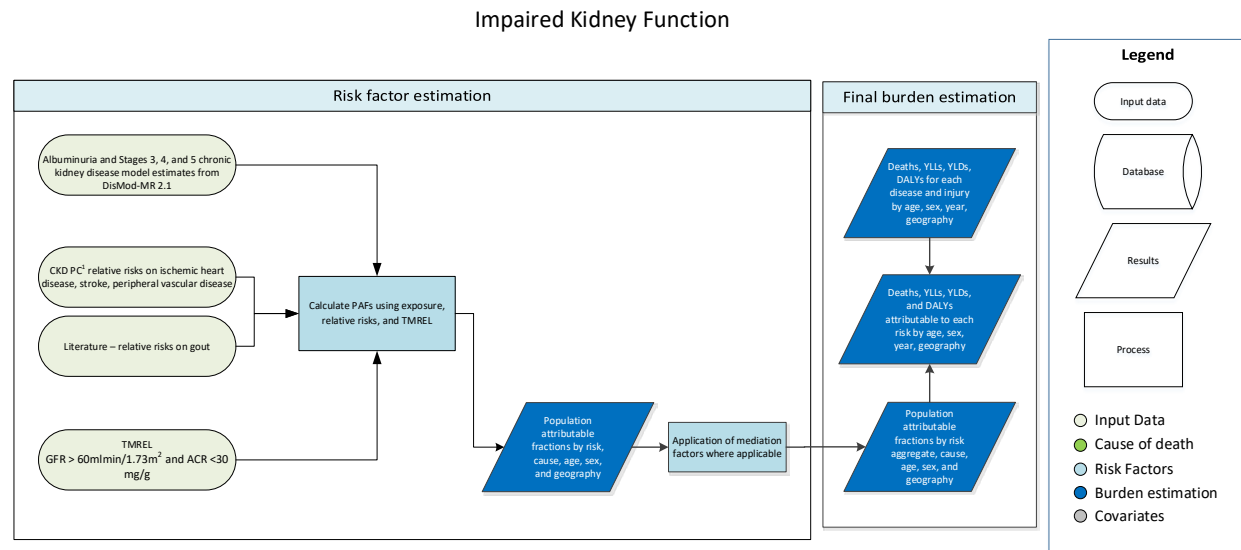

## Input Data & Methodological Summary

### Exposure

#### Case Definition

For GBD 2016, the impaired kidney function risk factor exposure is divided into four categories of renal function defined by urinary albumin to creatinine ratio (ACR) and estimated glomerular filtration rate (GFR): albuminuria with preserved GFR (ACR >30 mg/g & GFR ≥60 ml/min/1.73m<sup>2</sup>), chronic kidney disease (CKD) stage 3 (GFR of 30-59 ml/min/1.73m<sup>2</sup>), CKD stage 4 (GFR of 15-29 ml/min/1.73m<sup>2</sup>), and CKD stage 5 (GFR <15ml/min/1.73m<sup>2</sup>, not yet on renal replacement therapy). The modelling of CKD stages 3, 4, and 5 is described in detail in the appendix to the GBD 2016 non-fatal capstone paper as these are also disease sequelae.

This represents a change from GBD 2015 in which the “low glomerular filtration rate” risk factor was defined only as exposure to GFR <60 ml/min/1.73m<sup>2</sup> indicated by the prevalence of CKD stages 3, 4, and 5. For GBD 2016, albuminuria was added as an exposure category to capture the risk of cardiovascular outcomes due to impaired kidney function with preserved GFR.

#### Input data

For GBD 2010, a systematic review of the prevalence of low glomerular filtration rate throughout the world was conducted. This search was updated for GBD 2013 and GBD 2015. For GBD 2016 this literature search was repeated using PubMed search terms: (((("chronic kidney disease"[Title/Abstract]) AND prevalen\*[Title/Abstract]) AND ("2015/1/1"[Date - Publication] : "3000"[Date - Publication])) NOT ((animals[MeSH] NOT humans[MeSH])))). For GBD 2016, all previously extracted sources were reviewed for data pertaining to albuminuria.

| Disease       | Number of sources | Number of countries | Number of new sources for GBD 2016 |
|---------------|-------------------|---------------------|------------------------------------|
| Albuminuria   | 72                | 31                  | 72                                 |
| CKD Stage III | 112               | 47                  | 49                                 |
| CKD Stage IV  | 94                | 40                  | 45                                 |
| CKD Stage V   | 92                | 38                  | 49                                 |

Exclusion criteria included surveys that were not population-representative, studies not reporting on CKD by stage, and studies not reporting on albuminuria with preserved GFR (GFR  $\geq$ 60 ml/min/1.73m<sup>2</sup>).

### Modeling strategy

Estimates of exposure to CKD stages 3, 4, and 5 were obtained from the GBD 2016 non-fatal burden of disease analysis, which includes stage-specific prevalence estimates at the country level across twenty-three age-groups for both genders. The modeling strategy for these estimates is detailed in the appendix to the GBD 2016 non-fatal capstone paper.

Albuminuria exposure was modeled using DisMod-MR 2.1 to produce prevalence estimates by age, sex, year, and country. The albuminuria exposure model included country-level covariates indicating prevalence of diabetes mellitus and mean systolic blood pressure. As albuminuria classification is dependent on GFR, this model included a cross-walk adjusting data points obtained using estimating equations other than CKD-EPI to the CKD-EPI equation, which is our reference estimating equation for GBD 2016. We also applied a cross-walk to adjust alternate definitions of albuminuria to the reference definition of ACR > 30 mg/g & GFR  $\geq$ 60 ml/min/1.73m<sup>2</sup>. This crosswalk was informed with priors obtained from a linear regression using NHANES data to compare age-standardized prevalence of the alternate definition to reference definition. Regression outputs were used to adjust prevalence from studies using lower cut points to the reference definition to those using the reference cut point.

| Definition    | Value                |
|---------------|----------------------|
| ACR > 17 mg/g | 2.084 (1.530,2.639)  |
| ACR > 20 mg/g | 1.662 (1.220 2.103)  |
| ACR > 25 mg/g | 1.305 (1.112, 1.497) |

The relative risks were calculated by the Chronic Kidney Disease Prognosis Consortium, a consortium composed of population-level cohorts with prospective data collection from several countries (details below). YLDs and YLLs for Cardiovascular and gout were obtained from the GBD 2016 Study for the same geographic, time-period, and age-groups as detailed above.

### Theoretical minimum-risk exposure level

The theoretical minimum risk is a diagnosis of albuminuria or CKD stages 3, 4, or 5. An ACR above 30 mg/g and eGFR below 60ml/min/1.73m<sup>2</sup> have been demonstrated in the literature to be the thresholds at which increased cardiovascular and gout events occur secondary to impaired kidney function. (1-10)

## Relative risk

A two-stage pooled meta-analysis was used to calculate relative risks for ischemic heart disease, stroke, and peripheral vascular disease. The relative risk of these conditions was first determined within each cohort, and then a pooled analysis of cohort-level relative risks was performed using a random effects meta-analysis approach. Uncertainty intervals largely overlapped for the relative risks of fatal and nonfatal cardiovascular events from impaired kidney function exposure. Thus, we decided to use the relative risks from the combined analysis for fatal and nonfatal cardiovascular outcomes. Gout relative risk was determined by meta-analysis of a literature review performed for GBD 2013. Search terms included “gout” and “chronic kidney disease”. Exclusion criteria for search results included special populations, reversal of exposure and outcome categories, or unclear exposure category definition. This search resulted in four eligible studies. The literature review was repeated for GBD 2016, however, there were no new sources indicating increased risk of gout with albuminuria.

The relative risks were updated since the GBD 2015 analyses to account for a change in the reference group from those with GFR  $\geq 60$  ml/min/1.73m<sup>2</sup> to those with GFR  $\geq 60$  ml/min/1.73m<sup>2</sup> and ACR  $\leq 30$  mg/g.

## Population Attributable Fraction

We calculated the cardiovascular and gout fatal and nonfatal burden attributable to the categorical exposure to impaired kidney function using the following equation:

$$PAF = \frac{\sum_{i=1}^n P_i (RR_i - 1)}{\sum_{i=1}^n P_i (RR_i - 1) + 1}$$

**Equation 1.** PAF based on categorical exposure

where  $RR_i$  is the relative risk for exposure level  $i$ ,  $P_i$  is the proportion of the population in that exposure category, and  $n$  is the number of exposure categories.(11)

## References

1. Go AS, Chertow GM, Fan D, McCulloch CE, Hsu CY. Chronic kidney disease and the risks of death, cardiovascular events, and hospitalization. *N Engl J Med.* 2004;351(13):1296-305.
2. Ninomiya T, Kiyohara Y, Kubo M, Tanizaki Y, Doi Y, Okubo K, et al. Chronic kidney disease and cardiovascular disease in a general Japanese population: the Hisayama Study. *Kidney international.* 2005;68(1):228-36.
3. Shara NM, Wang H, Mete M, Al-Balha YR, Azalddin N, Lee ET, et al. Estimated GFR and incident cardiovascular disease events in American Indians: the Strong Heart Study. *American journal of kidney diseases : the official journal of the National Kidney Foundation.* 2012;60(5):795-803.

4. Mann JF, Gerstein HC, Pogue J, Bosch J, Yusuf S. Renal insufficiency as a predictor of cardiovascular outcomes and the impact of ramipril: the HOPE randomized trial. *Annals of internal medicine*. 2001;134(8):629-36.
5. Chronic Kidney Disease Prognosis C, Matsushita K, van der Velde M, Astor BC, Woodward M, Levey AS, et al. Association of estimated glomerular filtration rate and albuminuria with all-cause and cardiovascular mortality in general population cohorts: a collaborative meta-analysis. *Lancet*. 2010;375(9731):2073-81.
6. De Graauw J, Chonchol M, Poppert H, Etgen T, Sander D. Relationship between kidney function and risk of asymptomatic peripheral arterial disease in elderly subjects. *Nephrology, dialysis, transplantation : official publication of the European Dialysis and Transplant Association - European Renal Association*. 2011;26(3):927-32.
7. Wattanakit K, Folsom AR, Selvin E, Coresh J, Hirsch AT, Weatherley BD. Kidney function and risk of peripheral arterial disease: results from the Atherosclerosis Risk in Communities (ARIC) Study. *Journal of the American Society of Nephrology : JASN*. 2007;18(2):629-36.
8. O'Hare AM, Vittinghoff E, Hsia J, Shlipak MG. Renal insufficiency and the risk of lower extremity peripheral arterial disease: results from the Heart and Estrogen/Progestin Replacement Study (HERS). *Journal of the American Society of Nephrology : JASN*. 2004;15(4):1046-51.
9. Manjunath G, Tighiouart H, Coresh J, Macleod B, Salem DN, Griffith JL, et al. Level of kidney function as a risk factor for cardiovascular outcomes in the elderly. *Kidney international*. 2003;63(3):1121-9.
10. Manjunath G, Tighiouart H, Ibrahim H, MacLeod B, Salem DN, Griffith JL, et al. Level of kidney function as a risk factor for atherosclerotic cardiovascular outcomes in the community. *Journal of the American College of Cardiology*. 2003;41(1):47-55.
11. Miettinen OS. Proportion of disease caused or prevented by a given exposure, trait or intervention. *American journal of epidemiology*. 1974;99(5):325-32.
