# Supplementary material
Source: PubMed Central journal article supplement (PMC5933332)
Supplement: jama-319-1444-s002.pdf [file jama-319-1444-s002.pdf]

## Supplementary Online Content

Mokdad AH, Ballestros K, Echko M, et al. The state of US health, 1990-2016: burden of diseases, injuries, and risk factors among US states. *JAMA*. doi:10.1001/jama.2018.0158

**Appendix Figure 1.** Analytical flowchart for the development of the GBD 2016 COD database

**Appendix Figure 2.** GBD 2016 Causes of Death estimation flowchart by modeling group

**Appendix Figure 3.** GBD 2016 DisMod MR 2.1 analytical cascade

**Appendix Figure 4.** Causal Web of the causes of health outcomes with the categories of causes

**Appendix Figure 5.** Analytical flowchart of the comparative risk assessment for the estimation of PAFs

**Appendix Figure 6.** ST-GPR flowchart

**Appendix Table 1.** GBD 2016 location hierarchy with levels

**Appendix Table 2.** Causes included in the GBD 2016 Global Burden of Disease study

**Appendix Table 3.** GBD 2016 CodCorrect cause hierarchy with levels

**Appendix Table 4.** List of ICD codes mapped to the GBD cause list for causes of death

**Appendix Table 5.** GBD 2016 cause and sequela hierarchy

**Appendix Table 6.** GBD 2016 sequelae, health states, health state lay descriptions, and disability weights

**Appendix Table 7.** GBD 2016 methods of estimating YLDs for 35 residual categories

**Appendix Table 8.** GBD 2016 risk factor hierarchy with levels, modeling strategies, and the main type of data sources used to estimate exposure levels

**Appendix Table 9.** Types of Comparative Risk Assessments (CRA) based on the time perspective and the nature of the counterfactual level or distribution of exposure

**Appendix Table 10.** Percent change in age-standardised summary exposure values (SEVs) for leading ten risk factors for the United States 1990-2016, both sexes

**Appendix Table 11.** SDI values for all estimated GBD 2016 locations, 1980–2016

**Appendix Table 12.** The probability of death between 0 and 20 years in the United States, 50 states, and DC from 1990 to 2016 for Level 2 GBD causes

**Appendix Table 13.** The probability of death between 20 and 55 years in the United States, 50 states, and DC from 1990 to 2016 for Level 2 GBD causes

**Appendix Table 14.** The probability of death between 55 and 90 years in the United States, 50 states, and DC from 1990 to 2016 for Level 2 GBD causes

**Appendix Table 15.** 35q20 comparison with US, 50 states, and DC and GBD countries

This supplementary material has been provided by the authors to give readers additional information about their work.

## **Supplement 2 to “The State of US Health: Burden of Diseases, Injuries, and Risk Factors among US states, 1990 to 2016”**

This supplement provides appendix tables on the GBD cause and location hierarchy, as well as supplemental results.

## Table of Contents

- Appendix Figure 1. Analytical flowchart for the development of the GBD 2016 COD database**
- Appendix Figure 2. GBD 2016 Causes of Death estimation flowchart by modeling group**
- Appendix Figure 3. GBD 2016 DisMod MR 2.1 analytical cascade**
- Appendix Figure 4. Causal Web of the causes of health outcomes with the categories of causes**
- Appendix Figure 5. Analytical flowchart of the comparative risk assessment for the estimation of PAFs**
- Appendix Figure 6. ST-GPR flowchart**

- Appendix Table 1. GBD 2016 location hierarchy with levels**
- Appendix Table 2. Causes included in the GBD 2016 Global Burden of Disease study**
- Appendix Table 3. GBD 2016 CodCorrect cause hierarchy with levels**
- Appendix Table 4. List of ICD codes mapped to the GBD cause list for causes of death**
- Appendix Table 5. GBD 2016 cause and sequela hierarchy**
- Appendix Table 6. GBD 2016 sequelae, health states, health state lay descriptions, and disability weights**
- Appendix Table 7. GBD 2016 methods of estimating YLDs for 35 residual categories**
- Appendix Table 8. GBD 2016 risk factor hierarchy with levels, modeling strategies, and the main type of data sources used to estimate exposure levels**
- Appendix Table 9. Types of Comparative Risk Assessments (CRA) based on the time perspective and the nature of the counterfactual level or distribution of exposure**
- Appendix Table 10. Percent change in age-standardised summary exposure values (SEVs) for leading ten risk factors for the United States 1990-2016, both sexes**
- Appendix Table 11. SDI values for all estimated GBD 2016 locations, 1980–2016**
- Appendix Table 12. The probability of death between 0 and 20 years in the United States, 50 states, and DC from 1990 to 2016 for Level 2 GBD causes**
- Appendix Table 13. The probability of death between 20 and 55 years in the United States, 50 states, and DC from 1990 to 2016 for Level 2 GBD causes**
- Appendix Table 14. The probability of death between 55 and 90 years in the United States, 50 states, and DC from 1990 to 2016 for Level 2 GBD causes**
- Appendix Table 15. 35q20 comparison with US, 50 states, and DC and GBD countries**



Appendix Figure 2. GBD 2016 Causes of death estimation flowchart by modeling group

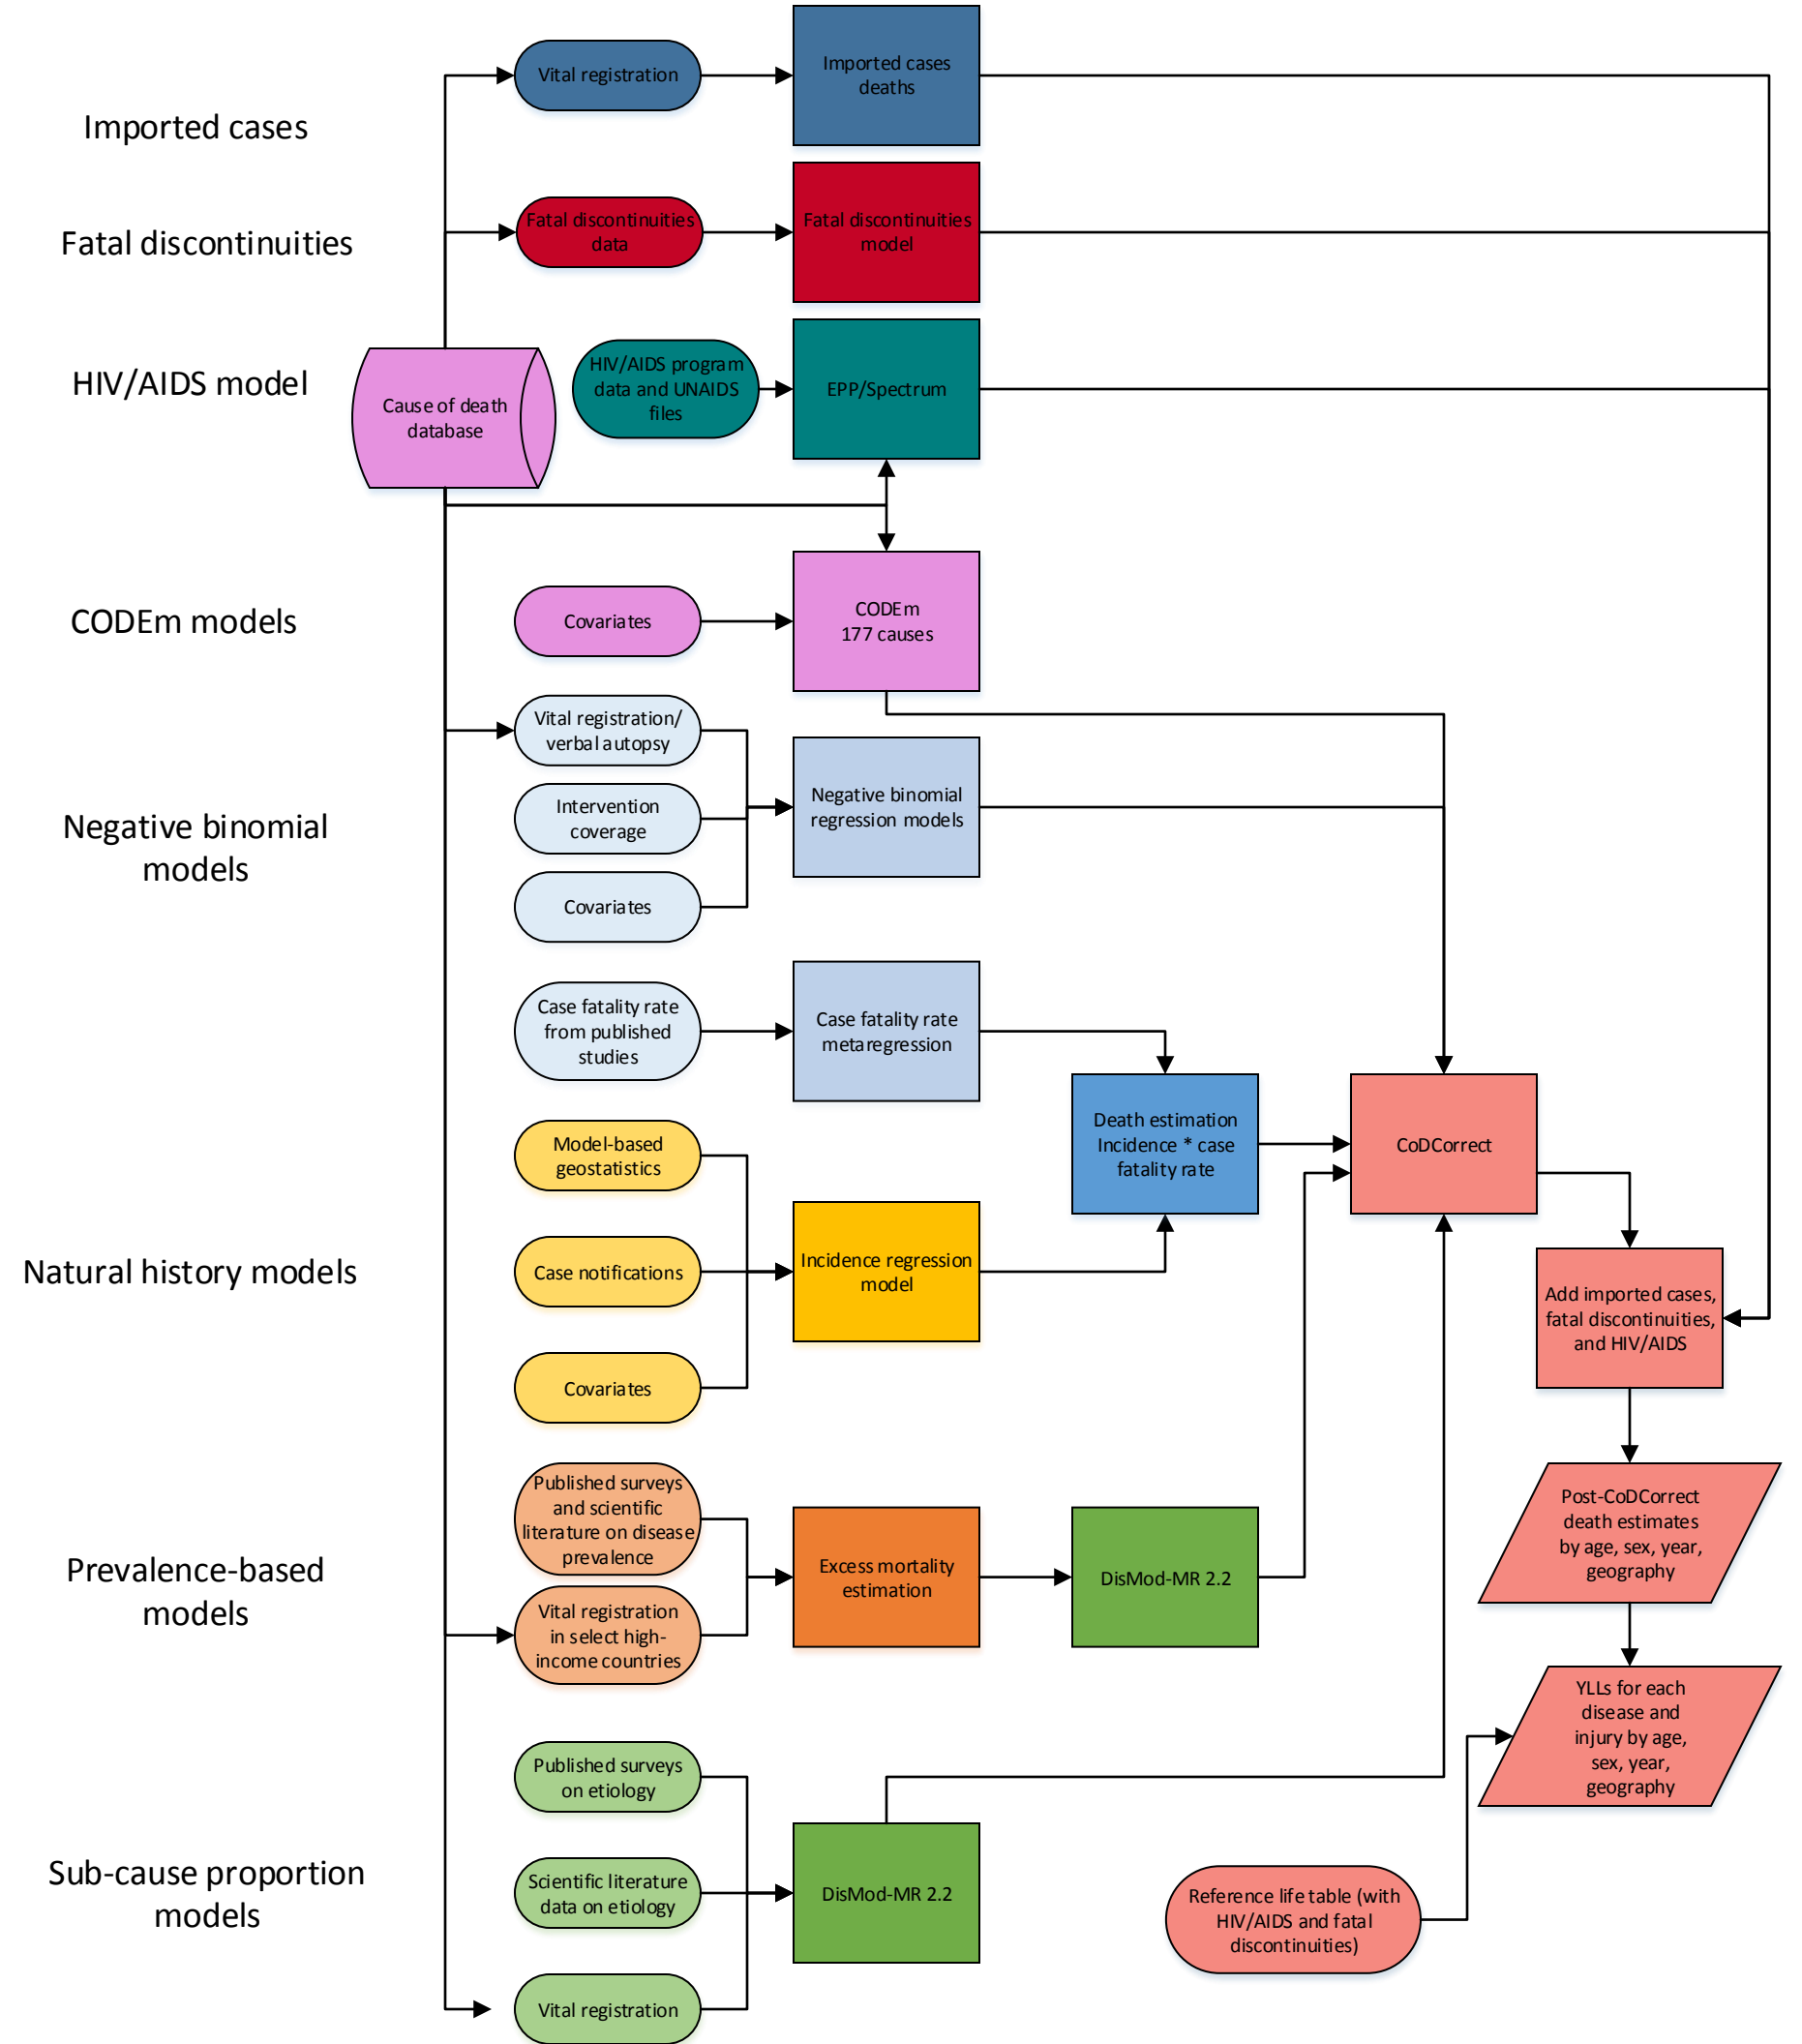

**Abbreviations:**  
 CODEm: Cause of death ensemble model  
 GBD: Global Burden of Disease  
 YLL: years of life lost  
 © 2018 American Medical Association. All rights reserved.



### Appendix Figure 3 - GBD 2016 DisMod-MR 2.1 analytical cascade

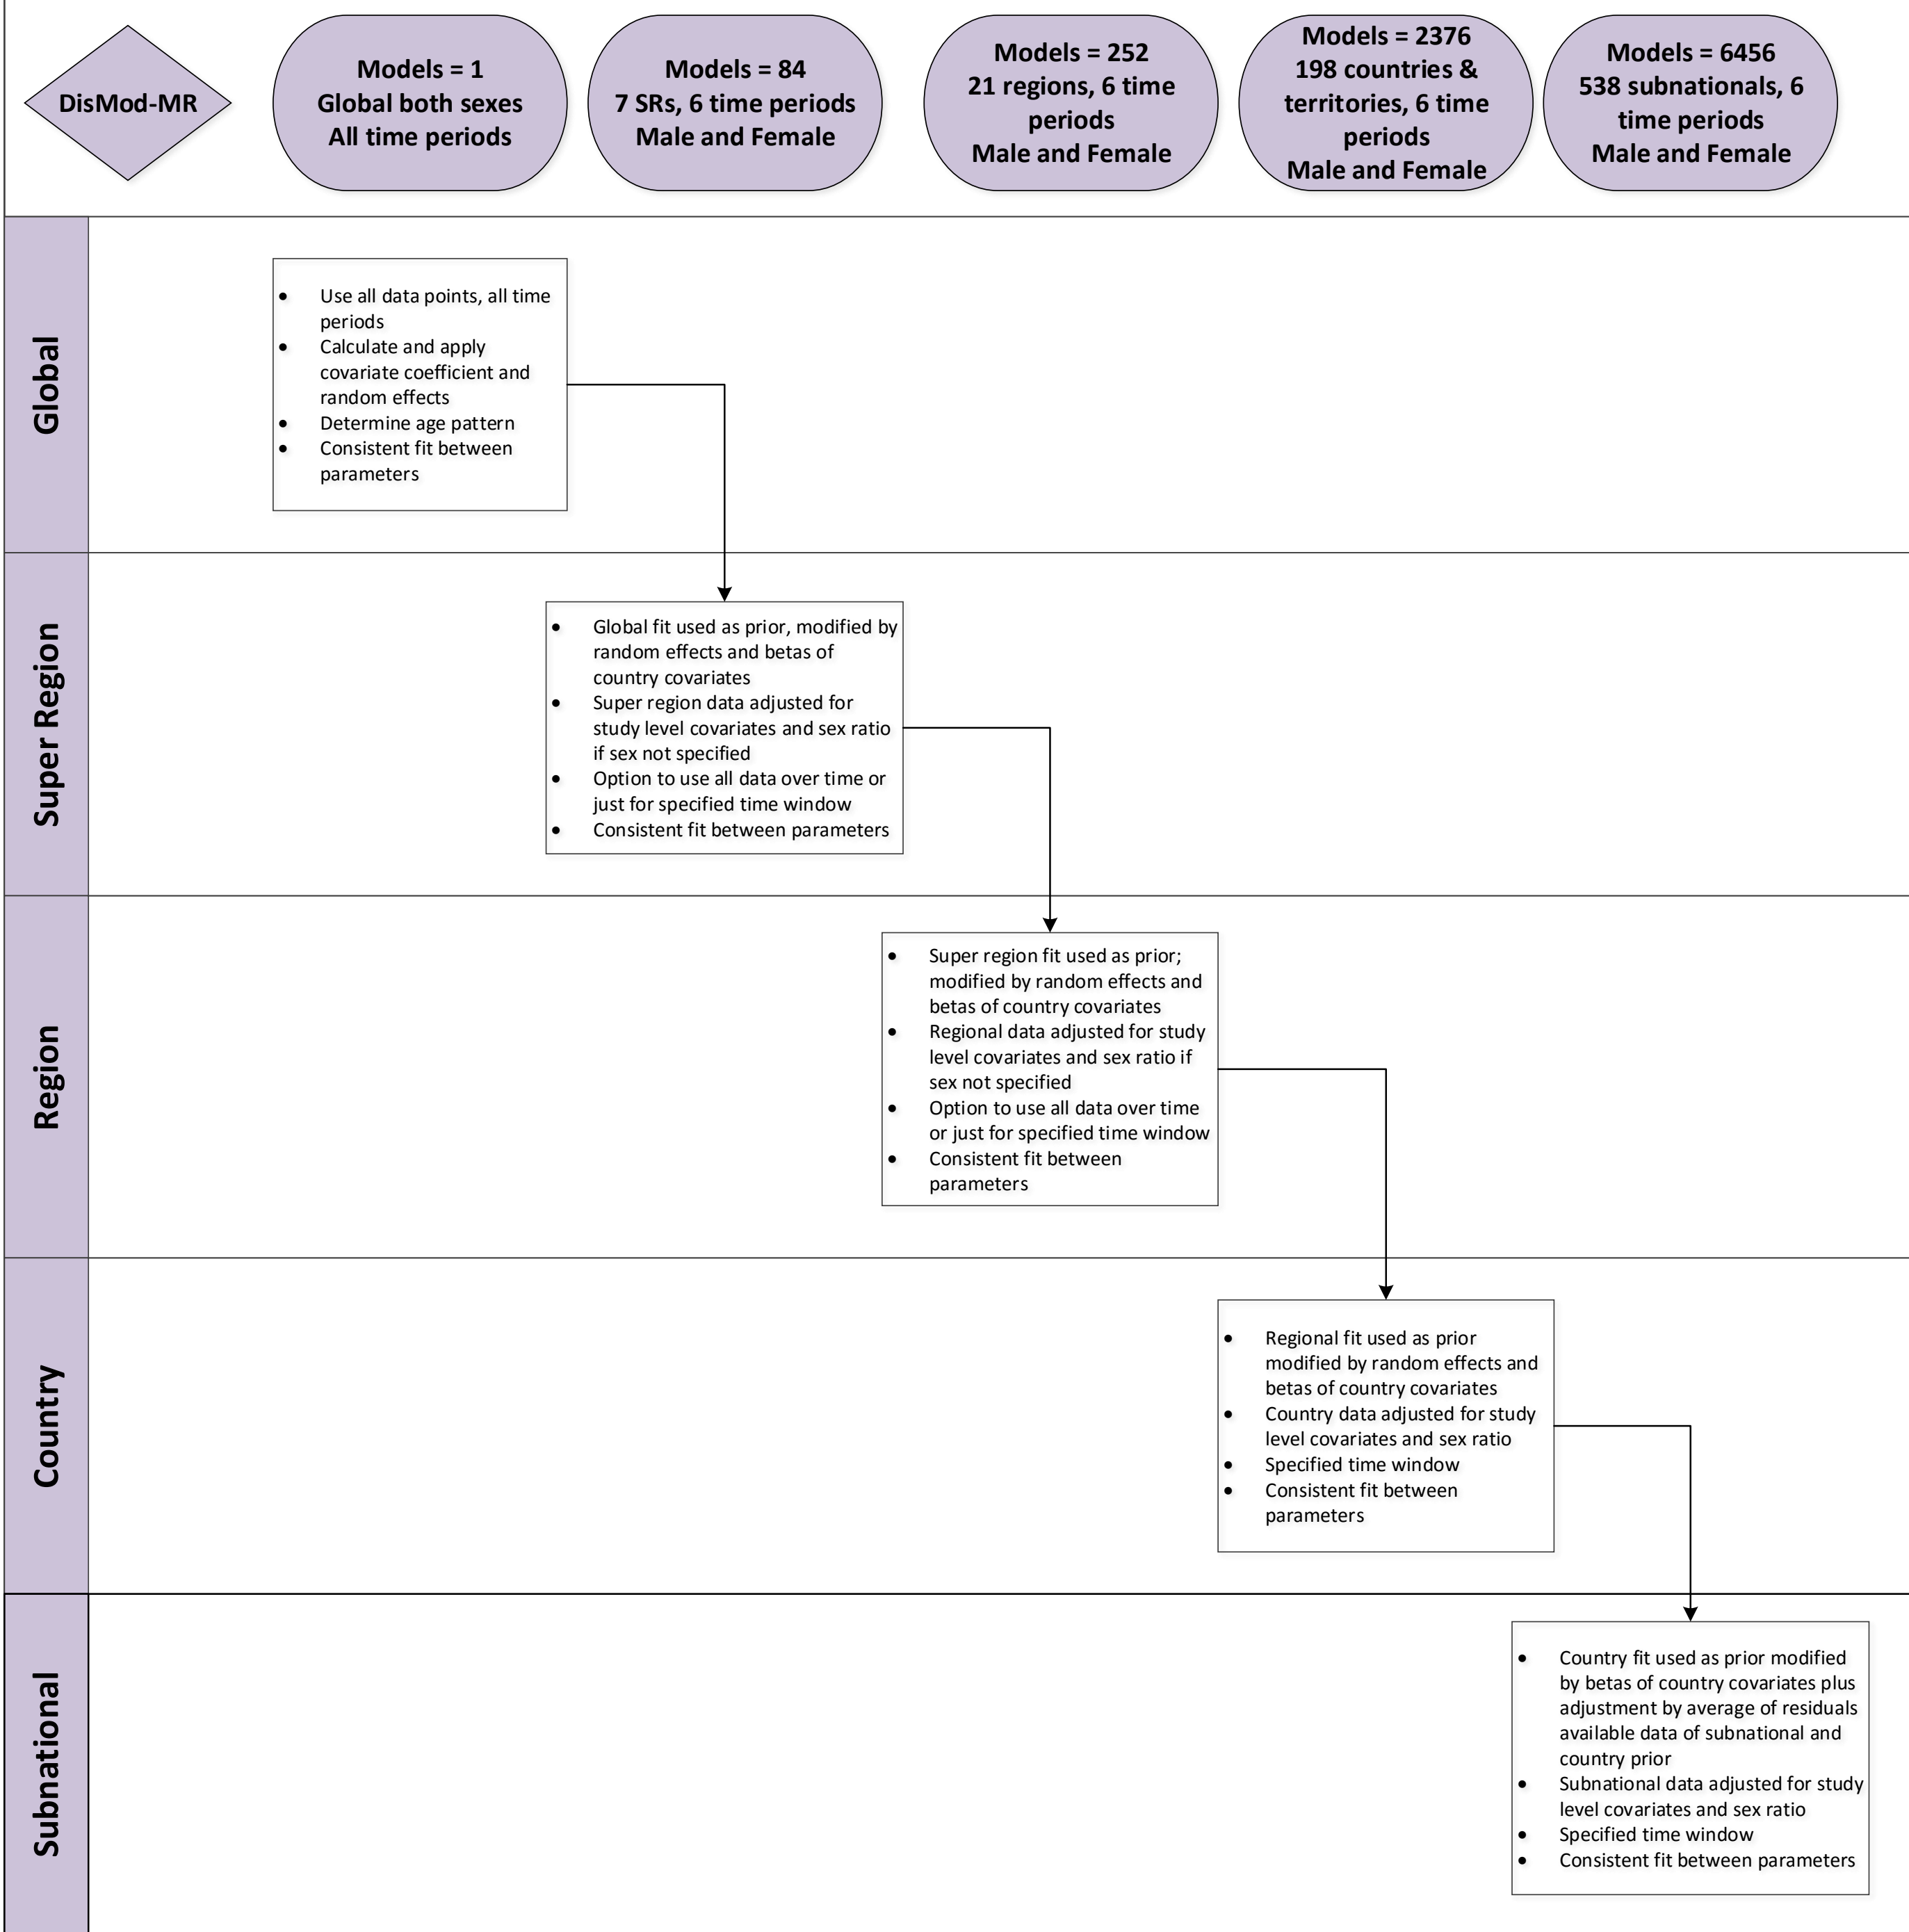

Appendix Figure 4. A more general causal web of the causes of health outcomes with the categories of causes included in this analysis shown in blue.

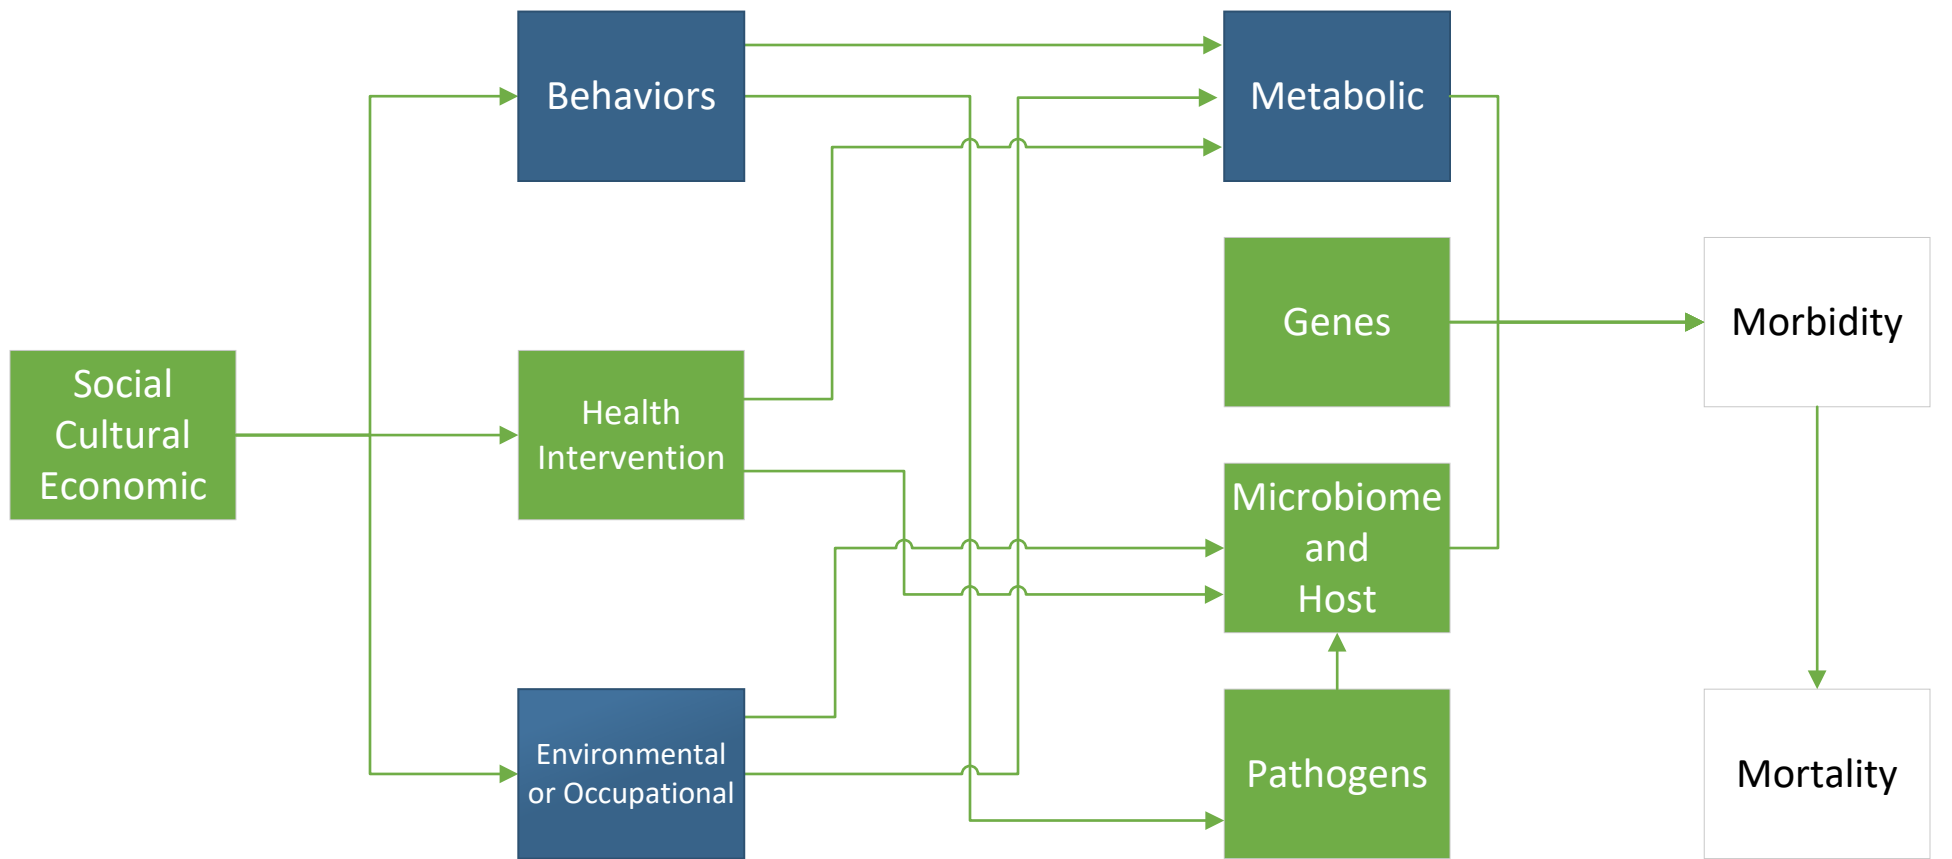

Legend:

- Currently included (Blue box)
- Not currently included (Green box)

© 2018 American Medical Association. All rights reserved.

**Appendix Figure 5. Analytical flowchart of the comparative risk assessment for the estimation of population attributable fractions by geography, age, sex, and year for GBD 2016.** Ovals represent data inputs, rectangular boxes represent analytical steps, cylinders represent databases, and parallelograms represent intermediate and final results. GBD=Global Burden of Disease. SEVs=Summary exposure values. TMREL=Theoretical minimum-risk exposure level. PAFs=Population attributable fractions. YLLs=years of life lost. YLDs=years lived with disability. DALYs=disability-adjusted life-years.

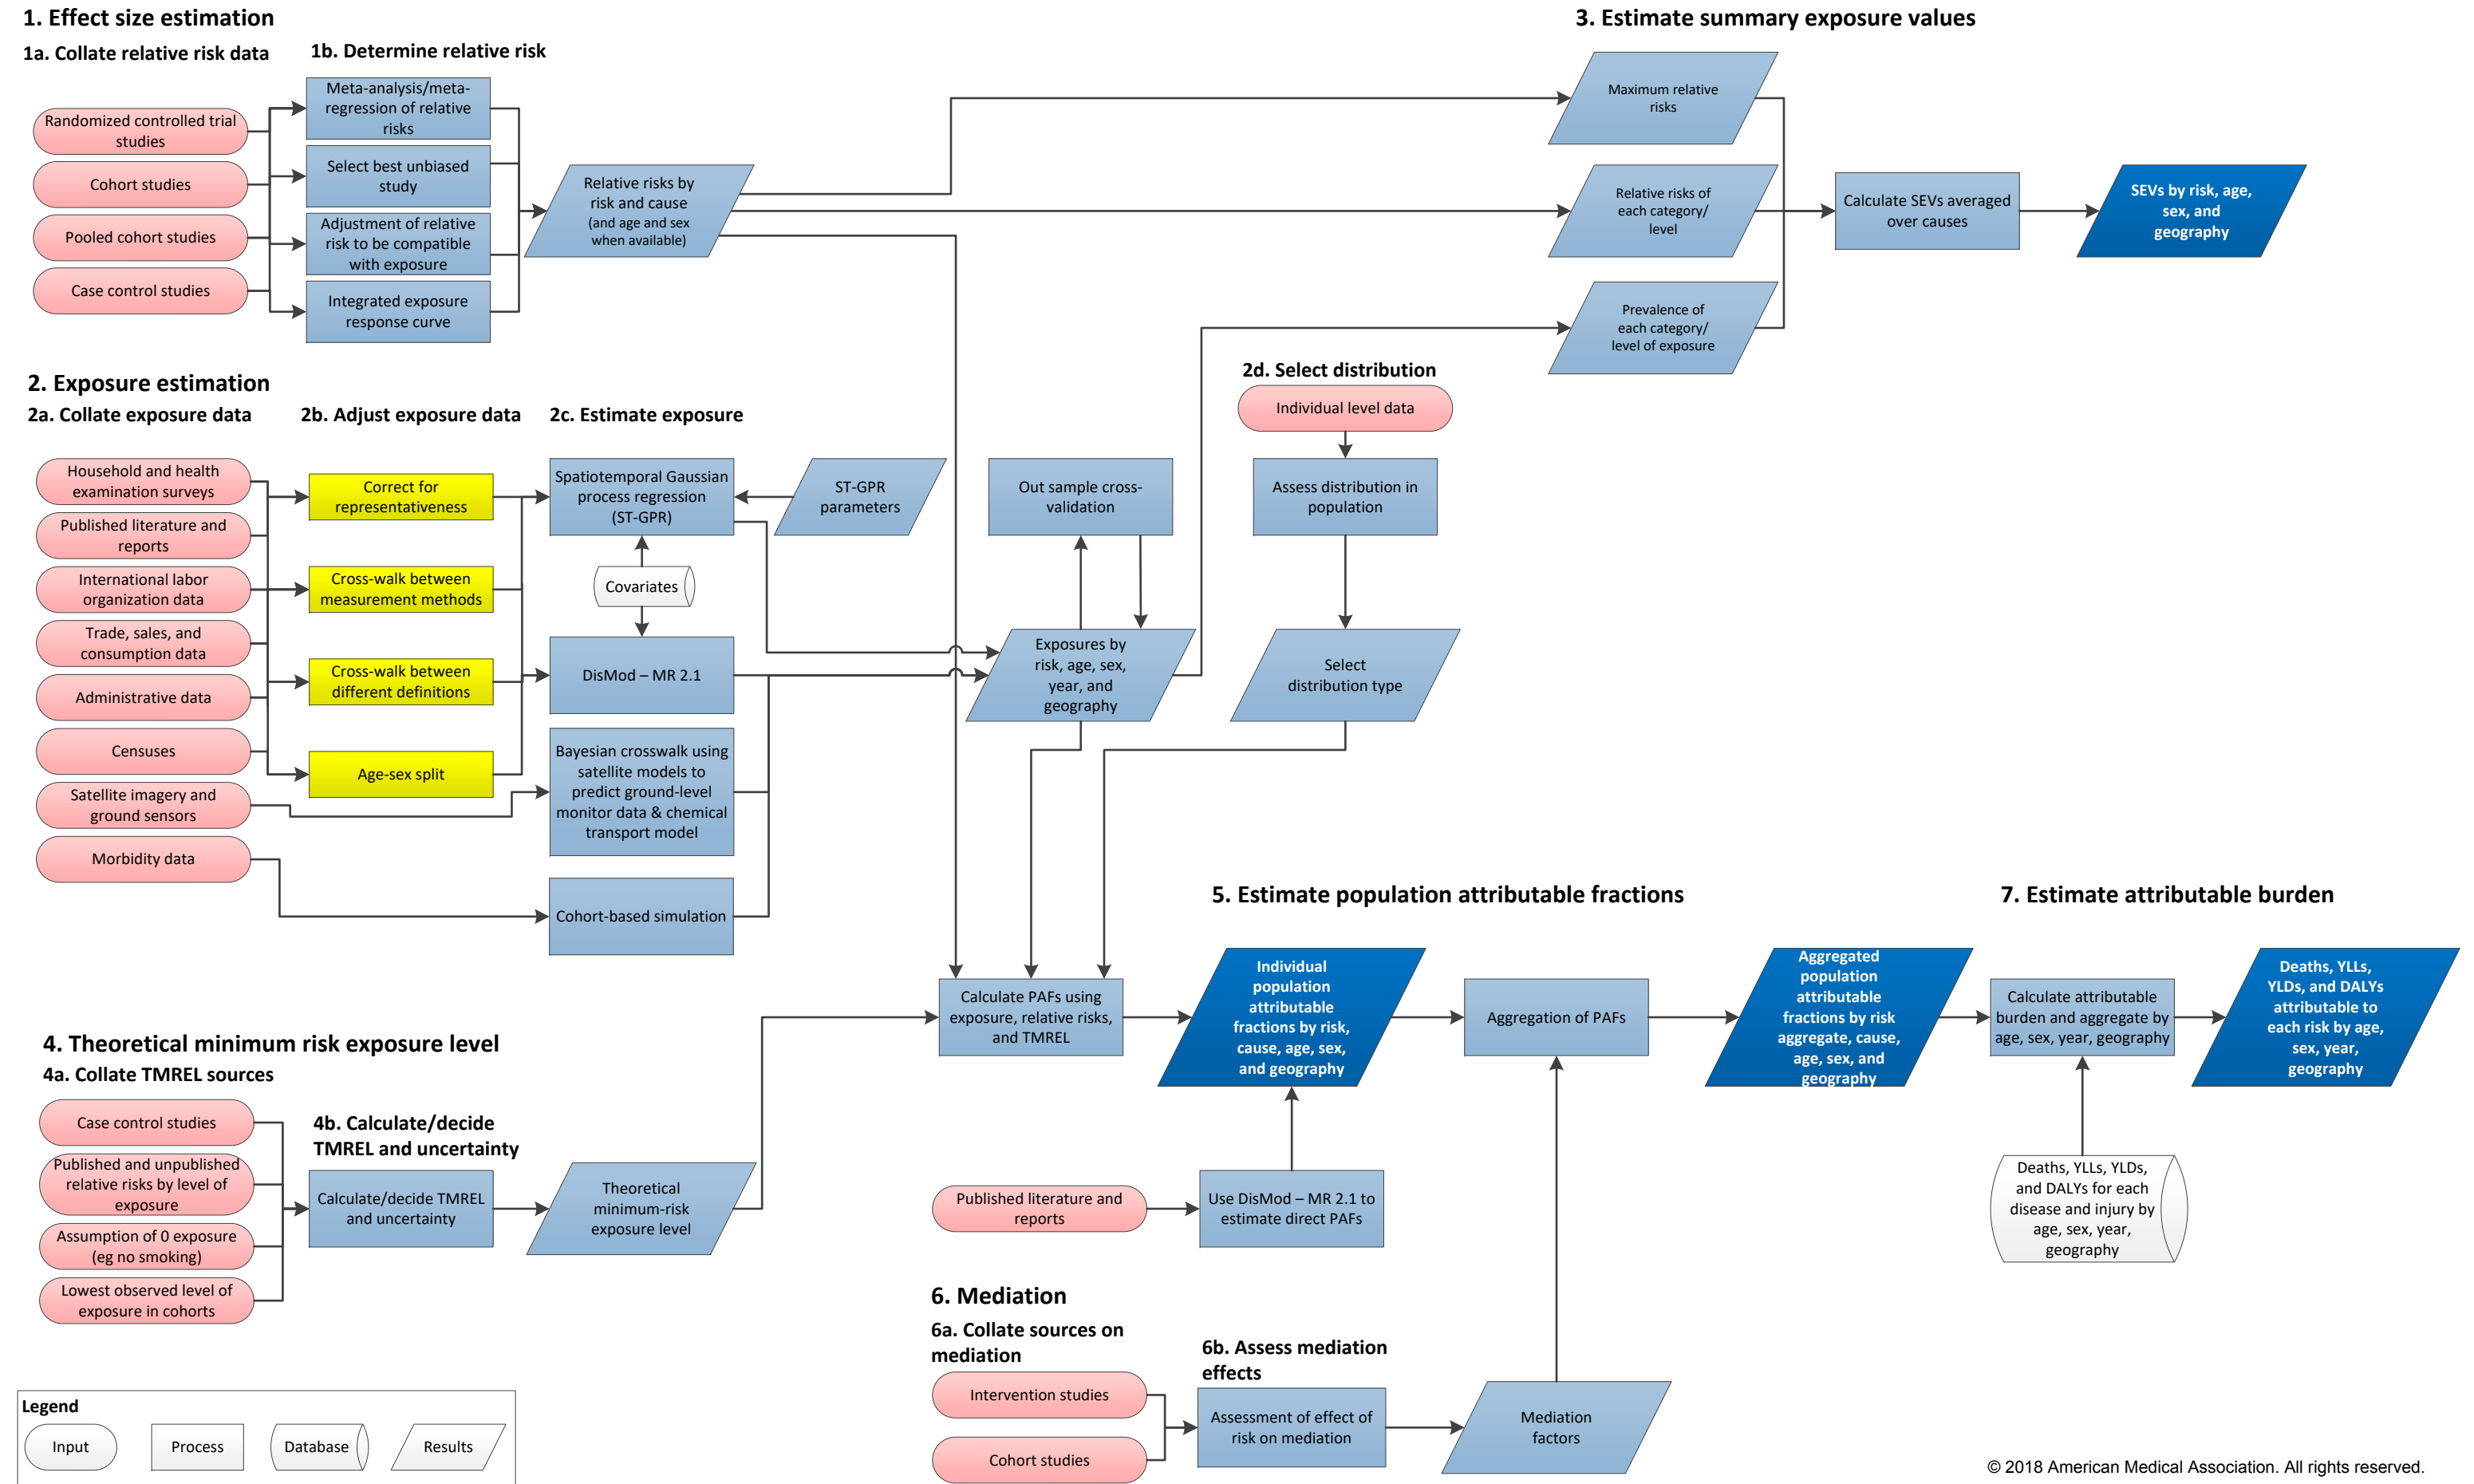



Appendix Figure 6. ST-GPR flowchart

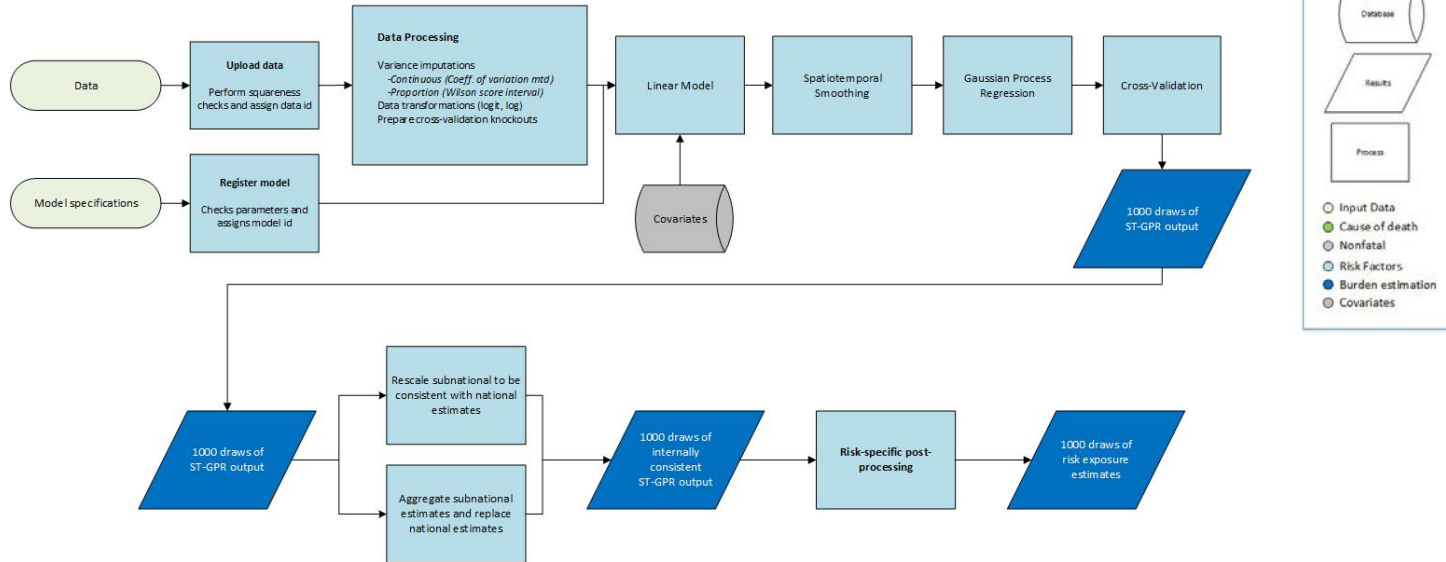

**Appendix Table 1: GBD 2016 location hierarchy with levels**

| Location                                         | Level |
|--------------------------------------------------|-------|
| Global                                           | 0     |
| Southeast Asia, East Asia, and Oceania           | 1     |
| East Asia                                        | 2     |
| China                                            | 3     |
| Anhui                                            | 4     |
| Beijing                                          | 4     |
| Chongqing                                        | 4     |
| Fujian                                           | 4     |
| Gansu                                            | 4     |
| Guangdong                                        | 4     |
| Guangxi                                          | 4     |
| Guizhou                                          | 4     |
| Hainan                                           | 4     |
| Hebei                                            | 4     |
| Heilongjiang                                     | 4     |
| Henan                                            | 4     |
| Hong Kong Special Administrative Region of China | 4     |
| Hubei                                            | 4     |
| Hunan                                            | 4     |
| Inner Mongolia                                   | 4     |
| Jiangsu                                          | 4     |
| Jiangxi                                          | 4     |
| Jilin                                            | 4     |
| Liaoning                                         | 4     |
| Macao Special Administrative Region of China     | 4     |
| Ningxia                                          | 4     |
| Qinghai                                          | 4     |
| Shaanxi                                          | 4     |
| Shandong                                         | 4     |
| Shanghai                                         | 4     |
| Shanxi                                           | 4     |
| Sichuan                                          | 4     |
| Tianjin                                          | 4     |
| Tibet                                            | 4     |
| Xinjiang                                         | 4     |
| Yunnan                                           | 4     |
| Zhejiang                                         | 4     |
| North Korea                                      | 3     |
| Taiwan (Province of China)                       | 3     |
| Southeast Asia                                   | 2     |
| Cambodia                                         | 3     |
| Indonesia                                        | 3     |
| Aceh                                             | 4     |
| Bali                                             | 4     |
| Bangka Belitung                                  | 4     |
| Banten                                           | 4     |

**Appendix Table 1: GBD 2016 location hierarchy with levels**

| Location                       | Level |
|--------------------------------|-------|
| Bengkulu                       | 4     |
| Gorontalo                      | 4     |
| Jakarta                        | 4     |
| Jambi                          | 4     |
| Central Java                   | 4     |
| West Java                      | 4     |
| East Java                      | 4     |
| West Kalimantan                | 4     |
| South Kalimantan               | 4     |
| Central Kalimantan             | 4     |
| East Kalimantan                | 4     |
| North Kalimantan               | 4     |
| Riau Islands                   | 4     |
| Lampung                        | 4     |
| Maluku                         | 4     |
| North Maluku                   | 4     |
| Nusa Tenggara Barat            | 4     |
| East Nusa Tenggara             | 4     |
| Papua                          | 4     |
| West Papua                     | 4     |
| Riau                           | 4     |
| West Sulawesi                  | 4     |
| South Sumatera                 | 4     |
| Central Sulawesi               | 4     |
| Southeast Sulawesi             | 4     |
| North Sulawesi                 | 4     |
| West Sumatera                  | 4     |
| South Sumatera                 | 4     |
| North Sumatera                 | 4     |
| Yogyakarta                     | 4     |
| Laos                           | 3     |
| Malaysia                       | 3     |
| Maldives                       | 3     |
| Mauritius                      | 3     |
| Myanmar                        | 3     |
| Philippines                    | 3     |
| Sri Lanka                      | 3     |
| Seychelles                     | 3     |
| Thailand                       | 3     |
| Timor-Leste                    | 3     |
| Vietnam                        | 3     |
| Oceania                        | 2     |
| American Samoa                 | 3     |
| Federated States of Micronesia | 3     |
| Fiji                           | 3     |
| Guam                           | 3     |

**Appendix Table 1: GBD 2016 location hierarchy with levels**

| Location                                         | Level |
|--------------------------------------------------|-------|
| Kiribati                                         | 3     |
| Marshall Islands                                 | 3     |
| Northern Mariana Islands                         | 3     |
| Papua New Guinea                                 | 3     |
| Samoa                                            | 3     |
| Solomon Islands                                  | 3     |
| Tonga                                            | 3     |
| Vanuatu                                          | 3     |
| Central Europe, Eastern Europe, and Central Asia | 1     |
| Central Asia                                     | 2     |
| Armenia                                          | 3     |
| Azerbaijan                                       | 3     |
| Georgia                                          | 4     |
| Georgia                                          | 3     |
| Kazakhstan                                       | 3     |
| Kyrgyzstan                                       | 3     |
| Mongolia                                         | 3     |
| Tajikistan                                       | 3     |
| Turkmenistan                                     | 3     |
| Uzbekistan                                       | 3     |
| Central Europe                                   | 2     |
| Albania                                          | 3     |
| Bosnia and Herzegovina                           | 3     |
| Bulgaria                                         | 3     |
| Croatia                                          | 3     |
| Czech Republic                                   | 3     |
| Hungary                                          | 3     |
| Macedonia                                        | 3     |
| Montenegro                                       | 3     |
| Poland                                           | 3     |
| Romania                                          | 3     |
| Serbia                                           | 3     |
| Slovakia                                         | 3     |
| Slovenia                                         | 3     |
| Eastern Europe                                   | 2     |
| Belarus                                          | 3     |
| Estonia                                          | 3     |
| Latvia                                           | 3     |
| Lithuania                                        | 3     |
| Moldova                                          | 3     |
| Russia                                           | 3     |
| Ukraine                                          | 3     |
| High-income                                      | 1     |
| High-income Asia Pacific                         | 2     |
| Brunei                                           | 3     |
| Japan                                            | 3     |

**Appendix Table 1: GBD 2016 location hierarchy with levels**

| Location  | Level |
|-----------|-------|
| Aichi     | 4     |
| Akita     | 4     |
| Aomori    | 4     |
| Chiba     | 4     |
| Ehime     | 4     |
| Fukui     | 4     |
| Fukuoka   | 4     |
| Fukushima | 4     |
| Gifu      | 4     |
| Gunma     | 4     |
| Hiroshima | 4     |
| Hokkaidō  | 4     |
| Hyōgo     | 4     |
| Ibaraki   | 4     |
| Ishikawa  | 4     |
| Iwate     | 4     |
| Kagawa    | 4     |
| Kagoshima | 4     |
| Kanagawa  | 4     |
| Kōchi     | 4     |
| Kumamoto  | 4     |
| Kyōto     | 4     |
| Mie       | 4     |
| Miyagi    | 4     |
| Miyazaki  | 4     |
| Nagano    | 4     |
| Nagasaki  | 4     |
| Nara      | 4     |
| Niigata   | 4     |
| Ōita      | 4     |
| Okayama   | 4     |
| Okinawa   | 4     |
| Ōsaka     | 4     |
| Saga      | 4     |
| Saitama   | 4     |
| Shiga     | 4     |
| Shimane   | 4     |
| Shizuoka  | 4     |
| Tochigi   | 4     |
| Tokushima | 4     |
| Tōkyō     | 4     |
| Tottori   | 4     |
| Toyama    | 4     |
| Wakayama  | 4     |
| Yamagata  | 4     |
| Yamaguchi | 4     |

**Appendix Table 1: GBD 2016 location hierarchy with levels**

| Location                | Level |
|-------------------------|-------|
| Yamanashi               | 4     |
| South Korea             | 3     |
| Singapore               | 3     |
| Australasia             | 2     |
| Australia               | 3     |
| New Zealand             | 3     |
| Western Europe          | 2     |
| Andorra                 | 3     |
| Austria                 | 3     |
| Belgium                 | 3     |
| Cyprus                  | 3     |
| Denmark                 | 3     |
| Finland                 | 3     |
| France                  | 3     |
| Germany                 | 3     |
| Greece                  | 3     |
| Iceland                 | 3     |
| Ireland                 | 3     |
| Israel                  | 3     |
| Italy                   | 3     |
| Luxembourg              | 3     |
| Malta                   | 3     |
| Netherlands             | 3     |
| Norway                  | 3     |
| Portugal                | 3     |
| Spain                   | 3     |
| Sweden                  | 3     |
| Stockholm               | 4     |
| Sweden except Stockholm | 4     |
| Switzerland             | 3     |
| United Kingdom          | 3     |
| England                 | 4     |
| East Midlands           | 5     |
| Derby                   | 6     |
| Derbyshire              | 6     |
| Leicester               | 6     |
| Leicestershire          | 6     |
| Lincolnshire            | 6     |
| Northamptonshire        | 6     |
| Nottingham              | 6     |
| Nottinghamshire         | 6     |
| Rutland                 | 6     |
| East of England         | 5     |
| Bedford                 | 6     |
| Cambridgeshire          | 6     |
| Central Bedfordshire    | 6     |



**Appendix Table 1: GBD 2016 location hierarchy with levels**

| Location               | Level |
|------------------------|-------|
| Essex                  | 6     |
| Hertfordshire          | 6     |
| Luton                  | 6     |
| Norfolk                | 6     |
| Peterborough           | 6     |
| Southend-on-Sea        | 6     |
| Suffolk                | 6     |
| Thurrock               | 6     |
| Greater London         | 5     |
| Barking and Dagenham   | 6     |
| Barnet                 | 6     |
| Bexley                 | 6     |
| Brent                  | 6     |
| Bromley                | 6     |
| Camden                 | 6     |
| Croydon                | 6     |
| Ealing                 | 6     |
| Enfield                | 6     |
| Greenwich              | 6     |
| Hackney                | 6     |
| Hammersmith and Fulham | 6     |
| Haringey               | 6     |
| Harrow                 | 6     |
| Havering               | 6     |
| Hillingdon             | 6     |
| Hounslow               | 6     |
| Islington              | 6     |
| Kensington and Chelsea | 6     |
| Kingston upon Thames   | 6     |
| Lambeth                | 6     |
| Lewisham               | 6     |
| Merton                 | 6     |
| Newham                 | 6     |
| Redbridge              | 6     |
| Richmond upon Thames   | 6     |
| Southwark              | 6     |
| Sutton                 | 6     |
| Tower Hamlets          | 6     |
| Waltham Forest         | 6     |
| Wandsworth             | 6     |
| Westminster            | 6     |
| North East England     | 5     |
| County Durham          | 6     |
| Darlington             | 6     |
| Gateshead              | 6     |
| Hartlepool             | 6     |

**Appendix Table 1: GBD 2016 location hierarchy with levels**

| Location                  | Level |
|---------------------------|-------|
| Middlesbrough             | 6     |
| Newcastle upon Tyne       | 6     |
| North Tyneside            | 6     |
| Northumberland            | 6     |
| Redcar and Cleveland      | 6     |
| South Tyneside            | 6     |
| Stockton-on-Tees          | 6     |
| Sunderland                | 6     |
| North West England        | 5     |
| Blackburn with Darwen     | 6     |
| Blackpool                 | 6     |
| Bolton                    | 6     |
| Bury                      | 6     |
| Cheshire East             | 6     |
| Cheshire West and Chester | 6     |
| Cumbria                   | 6     |
| Halton                    | 6     |
| Knowsley                  | 6     |
| Lancashire                | 6     |
| Liverpool                 | 6     |
| Manchester                | 6     |
| Oldham                    | 6     |
| Rochdale                  | 6     |
| Salford                   | 6     |
| Sefton                    | 6     |
| St Helens                 | 6     |
| Stockport                 | 6     |
| Tameside                  | 6     |
| Trafford                  | 6     |
| Warrington                | 6     |
| Wigan                     | 6     |
| Wirral                    | 6     |
| South East England        | 5     |
| Bracknell Forest          | 6     |
| Brighton and Hove         | 6     |
| Buckinghamshire           | 6     |
| East Sussex               | 6     |
| Hampshire                 | 6     |
| Isle of Wight             | 6     |
| Kent                      | 6     |
| Medway                    | 6     |
| Milton Keynes             | 6     |
| Oxfordshire               | 6     |
| Portsmouth                | 6     |
| Reading                   | 6     |
| Slough                    | 6     |

**Appendix Table 1: GBD 2016 location hierarchy with levels**

| Location                     | Level |
|------------------------------|-------|
| Southampton                  | 6     |
| Surrey                       | 6     |
| West Berkshire               | 6     |
| West Sussex                  | 6     |
| Windsor and Maidenhead       | 6     |
| Wokingham                    | 6     |
| South West England           | 5     |
| Bath and North East Somerset | 6     |
| Bournemouth                  | 6     |
| Bristol, City of             | 6     |
| Cornwall                     | 6     |
| Devon                        | 6     |
| Dorset                       | 6     |
| Gloucestershire              | 6     |
| North Somerset               | 6     |
| Plymouth                     | 6     |
| Poole                        | 6     |
| Somerset                     | 6     |
| South Gloucestershire        | 6     |
| Swindon                      | 6     |
| Torbay                       | 6     |
| Wiltshire                    | 6     |
| West Midlands                | 5     |
| Birmingham                   | 6     |
| Coventry                     | 6     |
| Dudley                       | 6     |
| Herefordshire, County of     | 6     |
| Sandwell                     | 6     |
| Shropshire                   | 6     |
| Solihull                     | 6     |
| Staffordshire                | 6     |
| Stoke-on-Trent               | 6     |
| Telford and Wrekin           | 6     |
| Walsall                      | 6     |
| Warwickshire                 | 6     |
| Wolverhampton                | 6     |
| Worcestershire               | 6     |
| Yorkshire and the Humber     | 5     |
| Barnsley                     | 6     |
| Bradford                     | 6     |
| Calderdale                   | 6     |
| Doncaster                    | 6     |
| East Riding of Yorkshire     | 6     |
| Kingston upon Hull, City of  | 6     |
| Kirklees                     | 6     |
| Leeds                        | 6     |

**Appendix Table 1: GBD 2016 location hierarchy with levels**

| Location                  | Level |
|---------------------------|-------|
| North East Lincolnshire   | 6     |
| North Lincolnshire        | 6     |
| North Yorkshire           | 6     |
| Rotherham                 | 6     |
| Sheffield                 | 6     |
| Wakefield                 | 6     |
| York                      | 6     |
| Northern Ireland          | 4     |
| Scotland                  | 4     |
| Wales                     | 4     |
| Southern Latin America    | 2     |
| Argentina                 | 3     |
| Chile                     | 3     |
| Uruguay                   | 3     |
| High-income North America | 2     |
| Canada                    | 3     |
| Greenland                 | 3     |
| USA                       | 3     |
| Alabama                   | 4     |
| Alaska                    | 4     |
| Arizona                   | 4     |
| Arkansas                  | 4     |
| California                | 4     |
| Colorado                  | 4     |
| Connecticut               | 4     |
| Delaware                  | 4     |
| District of Columbia      | 4     |
| Florida                   | 4     |
| Georgia                   | 3     |
| Georgia                   | 4     |
| Hawaii                    | 4     |
| Idaho                     | 4     |
| Illinois                  | 4     |
| Indiana                   | 4     |
| Iowa                      | 4     |
| Kansas                    | 4     |
| Kentucky                  | 4     |
| Louisiana                 | 4     |
| Maine                     | 4     |
| Maryland                  | 4     |
| Massachusetts             | 4     |
| Michigan                  | 4     |
| Minnesota                 | 4     |
| Mississippi               | 4     |
| Missouri                  | 4     |
| Montana                   | 4     |

**Appendix Table 1: GBD 2016 location hierarchy with levels**

| Location                         | Level |
|----------------------------------|-------|
| Nebraska                         | 4     |
| Nevada                           | 4     |
| New Hampshire                    | 4     |
| New Jersey                       | 4     |
| New Mexico                       | 4     |
| New York                         | 4     |
| North Carolina                   | 4     |
| North Dakota                     | 4     |
| Ohio                             | 4     |
| Oklahoma                         | 4     |
| Oregon                           | 4     |
| Pennsylvania                     | 4     |
| Rhode Island                     | 4     |
| South Carolina                   | 4     |
| South Dakota                     | 4     |
| Tennessee                        | 4     |
| Texas                            | 4     |
| Utah                             | 4     |
| Vermont                          | 4     |
| Virginia                         | 4     |
| Washington                       | 4     |
| West Virginia                    | 4     |
| Wisconsin                        | 4     |
| Wyoming                          | 4     |
| Latin America and Caribbean      | 1     |
| Caribbean                        | 2     |
| Antigua and Barbuda              | 3     |
| The Bahamas                      | 3     |
| Barbados                         | 3     |
| Belize                           | 3     |
| Bermuda                          | 3     |
| Cuba                             | 3     |
| Dominica                         | 3     |
| Dominican Republic               | 3     |
| Grenada                          | 3     |
| Guyana                           | 3     |
| Haiti                            | 3     |
| Jamaica                          | 3     |
| Puerto Rico                      | 3     |
| Saint Lucia                      | 3     |
| Saint Vincent and the Grenadines | 3     |
| Suriname                         | 3     |
| Trinidad and Tobago              | 3     |
| Virgin Islands, U.S.             | 3     |
| Andean Latin America             | 2     |
| Bolivia                          | 3     |

**Appendix Table 1: GBD 2016 location hierarchy with levels**

| Location                        | Level |
|---------------------------------|-------|
| Ecuador                         | 3     |
| Peru                            | 3     |
| Central Latin America           | 2     |
| Colombia                        | 3     |
| Costa Rica                      | 3     |
| El Salvador                     | 3     |
| Guatemala                       | 3     |
| Honduras                        | 3     |
| Mexico                          | 3     |
| Aguascalientes                  | 4     |
| Baja California                 | 4     |
| Baja California Sur             | 4     |
| Campeche                        | 4     |
| Chiapas                         | 4     |
| Chihuahua                       | 4     |
| Coahuila                        | 4     |
| Colima                          | 4     |
| Distrito Federal                | 4     |
| Distrito Federal                | 4     |
| Durango                         | 4     |
| Guanajuato                      | 4     |
| Guerrero                        | 4     |
| Hidalgo                         | 4     |
| Jalisco                         | 4     |
| México                          | 4     |
| Michoacán de Ocampo             | 4     |
| Morelos                         | 4     |
| Nayarit                         | 4     |
| Nuevo León                      | 4     |
| Oaxaca                          | 4     |
| Puebla                          | 4     |
| Querétaro                       | 4     |
| Quintana Roo                    | 4     |
| San Luis Potosí                 | 4     |
| Sinaloa                         | 4     |
| Sonora                          | 4     |
| Tabasco                         | 4     |
| Tamaulipas                      | 4     |
| Tlaxcala                        | 4     |
| Veracruz de Ignacio de la Llave | 4     |
| Yucatán                         | 4     |
| Zacatecas                       | 4     |
| Nicaragua                       | 3     |
| Panama                          | 3     |
| Venezuela                       | 3     |
| Tropical Latin America          | 2     |



**Appendix Table 1: GBD 2016 location hierarchy with levels**

| Location                     | Level |
|------------------------------|-------|
| Brazil                       | 3     |
| Acre                         | 4     |
| Alagoas                      | 4     |
| Amapá                        | 4     |
| Amazonas                     | 4     |
| Bahia                        | 4     |
| Ceará                        | 4     |
| Distrito Federal             | 4     |
| Distrito Federal             | 4     |
| Espírito Santo               | 4     |
| Goiás                        | 4     |
| Maranhão                     | 4     |
| Mato Grosso                  | 4     |
| Mato Grosso do Sul           | 4     |
| Minas Gerais                 | 4     |
| Pará                         | 4     |
| Paraíba                      | 4     |
| Paraná                       | 4     |
| Pernambuco                   | 4     |
| Piauí                        | 4     |
| Rio de Janeiro               | 4     |
| Rio Grande do Norte          | 4     |
| Rio Grande do Sul            | 4     |
| Rondônia                     | 4     |
| Roraima                      | 4     |
| Santa Catarina               | 4     |
| São Paulo                    | 4     |
| Sergipe                      | 4     |
| Tocantins                    | 4     |
| Paraguay                     | 3     |
| North Africa and Middle East | 1     |
| North Africa and Middle East | 2     |
| Afghanistan                  | 3     |
| Algeria                      | 3     |
| Bahrain                      | 3     |
| Egypt                        | 3     |
| Iran                         | 3     |
| Iraq                         | 3     |
| Jordan                       | 3     |
| Kuwait                       | 3     |
| Lebanon                      | 3     |
| Libya                        | 3     |
| Morocco                      | 3     |
| Palestine                    | 3     |
| Oman                         | 3     |
| Qatar                        | 3     |

**Appendix Table 1: GBD 2016 location hierarchy with levels**

| Location                 | Level |
|--------------------------|-------|
| Saudi Arabia             | 3     |
| 'Asir                    | 4     |
| Bahah                    | 4     |
| Eastern Province         | 4     |
| Ha'il                    | 4     |
| Jawf                     | 4     |
| Jizan                    | 4     |
| Madinah                  | 4     |
| Makkah                   | 4     |
| Najran                   | 4     |
| Northern Borders         | 4     |
| Qassim                   | 4     |
| Riyadh                   | 4     |
| Tabuk                    | 4     |
| Sudan                    | 3     |
| Syria                    | 3     |
| Tunisia                  | 3     |
| Turkey                   | 3     |
| United Arab Emirates     | 3     |
| Yemen                    | 3     |
| South Asia               | 1     |
| South Asia               | 2     |
| Bangladesh               | 3     |
| Bhutan                   | 3     |
| India                    | 3     |
| Andhra Pradesh           | 4     |
| Andhra Pradesh, Rural    | 5     |
| Andhra Pradesh, Urban    | 5     |
| Arunāchal Pradesh        | 4     |
| Arunāchal Pradesh, Rural | 5     |
| Arunāchal Pradesh, Urban | 5     |
| Assam                    | 4     |
| Assam, Rural             | 5     |
| Assam, Urban             | 5     |
| Bihār                    | 4     |
| Bihār, Rural             | 5     |
| Bihār, Urban             | 5     |
| Chhattīsgarh             | 4     |
| Chhattīsgarh, Rural      | 5     |
| Chhattīsgarh, Urban      | 5     |
| Delhi                    | 4     |
| Delhi, Rural             | 5     |
| Delhi, Urban             | 5     |
| Goa                      | 4     |
| Goa, Rural               | 5     |
| Goa, Urban               | 5     |

**Appendix Table 1: GBD 2016 location hierarchy with levels**

| Location                 | Level |
|--------------------------|-------|
| Gujarāt                  | 4     |
| Gujarāt, Rural           | 5     |
| Gujarāt, Urban           | 5     |
| Haryāna                  | 4     |
| Haryāna, Rural           | 5     |
| Haryāna, Urban           | 5     |
| Himachal Pradesh         | 4     |
| Himachal Pradesh, Rural  | 5     |
| Himachal Pradesh, Urban  | 5     |
| Jammu and Kashmīr        | 4     |
| Jammu and Kashmīr, Rural | 5     |
| Jammu and Kashmīr, Urban | 5     |
| Jharkhand                | 4     |
| Jharkhand, Rural         | 5     |
| Jharkhand, Urban         | 5     |
| Karnātaka                | 4     |
| Karnātaka, Rural         | 5     |
| Karnātaka, Urban         | 5     |
| Kerala                   | 4     |
| Kerala, Rural            | 5     |
| Kerala, Urban            | 5     |
| Madhya Pradesh           | 4     |
| Madhya Pradesh, Rural    | 5     |
| Madhya Pradesh, Urban    | 5     |
| Mahārāshtra              | 4     |
| Mahārāshtra, Rural       | 5     |
| Mahārāshtra, Urban       | 5     |
| Manipur                  | 4     |
| Manipur, Rural           | 5     |
| Manipur, Urban           | 5     |
| Meghālaya                | 4     |
| Meghālaya, Rural         | 5     |
| Meghālaya, Urban         | 5     |
| Mizoram                  | 4     |
| Mizoram, Rural           | 5     |
| Mizoram, Urban           | 5     |
| Nāgāland                 | 4     |
| Nāgāland, Rural          | 5     |
| Nāgāland, Urban          | 5     |
| Orissa                   | 4     |
| Orissa, Rural            | 5     |
| Orissa, Urban            | 5     |
| Punjab                   | 4     |
| Punjab, Rural            | 5     |
| Punjab, Urban            | 5     |
| Rājasthān                | 4     |

**Appendix Table 1: GBD 2016 location hierarchy with levels**

| Location                         | Level |
|----------------------------------|-------|
| Rājasthān, Rural                 | 5     |
| Rājasthān, Urban                 | 5     |
| Sikkim                           | 4     |
| Sikkim, Rural                    | 5     |
| Sikkim, Urban                    | 5     |
| Tamil Nādu                       | 4     |
| Tamil Nādu, Rural                | 5     |
| Tamil Nādu, Urban                | 5     |
| Telangana                        | 4     |
| Telangana, Rural                 | 5     |
| Telangana, Urban                 | 5     |
| Tripura                          | 4     |
| Tripura, Rural                   | 5     |
| Tripura, Urban                   | 5     |
| Uttar Pradesh                    | 4     |
| Uttar Pradesh, Rural             | 5     |
| Uttar Pradesh, Urban             | 5     |
| Uttarakhand                      | 4     |
| Uttarakhand, Rural               | 5     |
| Uttarakhand, Urban               | 5     |
| West Bengal                      | 4     |
| West Bengal, Rural               | 5     |
| West Bengal, Urban               | 5     |
| The Six Minor Territories        | 4     |
| The Six Minor Territories, Rural | 5     |
| The Six Minor Territories, Urban | 5     |
| Nepal                            | 3     |
| Pakistan                         | 3     |
| Sub-Saharan Africa               | 1     |
| Central Sub-Saharan Africa       | 2     |
| Angola                           | 3     |
| the Central African Republic     | 3     |
| Congo (Brazzaville)              | 3     |
| Democratic Republic of the Congo | 3     |
| Equatorial Guinea                | 3     |
| Gabon                            | 3     |
| Eastern Sub-Saharan Africa       | 2     |
| Burundi                          | 3     |
| Comoros                          | 3     |
| Djibouti                         | 3     |
| Eritrea                          | 3     |
| Ethiopia                         | 3     |
| Kenya                            | 3     |
| Baringo                          | 4     |
| Bomet                            | 4     |
| Bungoma                          | 4     |

**Appendix Table 1: GBD 2016 location hierarchy with levels**

| Location        | Level |
|-----------------|-------|
| Busia           | 4     |
| Elgeyo-Marakwet | 4     |
| Embu            | 4     |
| Garissa         | 4     |
| HomaBay         | 4     |
| Isiolo          | 4     |
| Kajiado         | 4     |
| Kakamega        | 4     |
| Kericho         | 4     |
| Kiambu          | 4     |
| Kilifi          | 4     |
| Kirinyaga       | 4     |
| Kisii           | 4     |
| Kisumu          | 4     |
| Kitui           | 4     |
| Kwale           | 4     |
| Laikipia        | 4     |
| Lamu            | 4     |
| Machakos        | 4     |
| Makueni         | 4     |
| Mandera         | 4     |
| Marsabit        | 4     |
| Meru            | 4     |
| Migori          | 4     |
| Mombasa         | 4     |
| Murang'a        | 4     |
| Nairobi         | 4     |
| Nakuru          | 4     |
| Nandi           | 4     |
| Narok           | 4     |
| Nyamira         | 4     |
| Nyandarua       | 4     |
| Nyeri           | 4     |
| Samburu         | 4     |
| Siaya           | 4     |
| TaitaTaveta     | 4     |
| TanaRiver       | 4     |
| TharakaNithi    | 4     |
| TransNzoia      | 4     |
| Turkana         | 4     |
| UasinGishu      | 4     |
| Vihiga          | 4     |
| Wajir           | 4     |
| WestPokot       | 4     |
| Madagascar      | 3     |
| Malawi          | 3     |

**Appendix Table 1: GBD 2016 location hierarchy with levels**

| Location                    | Level |
|-----------------------------|-------|
| Mozambique                  | 3     |
| Rwanda                      | 3     |
| Somalia                     | 3     |
| South Sudan                 | 3     |
| Tanzania                    | 3     |
| Uganda                      | 3     |
| Zambia                      | 3     |
| Southern Sub-Saharan Africa | 2     |
| Botswana                    | 3     |
| Lesotho                     | 3     |
| Namibia                     | 3     |
| South Africa                | 3     |
| Eastern Cape                | 4     |
| Free State                  | 4     |
| Gauteng                     | 4     |
| KwaZulu-Natal               | 4     |
| Limpopo                     | 4     |
| Mpumalanga                  | 4     |
| North-West                  | 4     |
| Northern Cape               | 4     |
| Western Cape                | 4     |
| Swaziland                   | 3     |
| Zimbabwe                    | 3     |
| Western Sub-Saharan Africa  | 2     |
| Benin                       | 3     |
| Burkina Faso                | 3     |
| Cameroon                    | 3     |
| Cape Verde                  | 3     |
| Chad                        | 3     |
| Cote d'Ivoire               | 3     |
| The Gambia                  | 3     |
| Ghana                       | 3     |
| Guinea                      | 3     |
| Guinea-Bissau               | 3     |
| Liberia                     | 3     |
| Mali                        | 3     |
| Mauritania                  | 3     |
| Niger                       | 3     |
| Nigeria                     | 3     |
| Sao Tome and Principe       | 3     |
| Senegal                     | 3     |
| Sierra Leone                | 3     |
| Togo                        | 3     |



**Appendix Table 2. Causes included in the 2016 Global Burden of Disease Study**

| Cause level | Cause Names: Long and Short                                                                 | Cause of death | Cause of burden |
|-------------|---------------------------------------------------------------------------------------------|----------------|-----------------|
| 0           | All causes                                                                                  | X              | X               |
| 1           | Communicable, maternal, neonatal, and nutritional disorders, CMNN                           | X              | X               |
| 2           | HIV/AIDS and tuberculosis, HIV+TB                                                           | X              | X               |
| 3           | Tuberculosis, TB                                                                            | X              | X               |
| 4           | Drug-sensitive tuberculosis, Drug-Sus TB                                                    | X              | X               |
| 4           | Multidrug-resistant tuberculosis without extensive drug resistance, MDR-TB                  | X              | X               |
| 4           | Extensively drug-resistant tuberculosis, XDR-TB                                             | X              | X               |
| 4           | Latent tuberculosis infection, LTBI                                                         |                | X               |
| 3           | HIV/AIDS, HIV                                                                               | X              | X               |
| 4           | Drug HIV/AIDS - Tuberculosis, Drug HIV-TB                                                   | X              | X               |
| 4           | Multidrug-resistant HIV/AIDS - Tuberculosis without extensive drug resistance, MDR HIV-TB   | X              | X               |
| 4           | Extensively drug-resistant HIV/AIDS - Tuberculosis, XDR HIV-TB                              | X              | X               |
| 4           | HIV/AIDS resulting in other diseases, Oth HIV                                               | X              | X               |
| 2           | Diarrhoea, lower respiratory infections, and other common infectious diseases, Diar+LRI+Oth | X              | X               |
| 3           | Diarrhoeal diseases, Diarrhea                                                               | X              | X               |
| 3           | Intestinal infectious diseases, Intest infec                                                | X              | X               |
| 4           | Typhoid fever, Typhoid                                                                      | X              | X               |
| 4           | Paratyphoid fever, Paratyph                                                                 | X              | X               |
| 4           | Other intestinal infectious diseases, Other intest                                          | X              | X               |
| 3           | Lower respiratory infections, LRI                                                           | X              | X               |
| 3           | Upper respiratory infections, URI                                                           | X              | X               |
| 3           | Otitis media, Otitis                                                                        | X              | X               |
| 3           | Meningitis, Meningitis                                                                      | X              | X               |
| 4           | Pneumococcal meningitis, Mng Pnc                                                            | X              | X               |
| 4           | H influenzae type B meningitis, Mng HiB                                                     | X              | X               |
| 4           | Meningococcal infection, Mng Men                                                            | X              | X               |

**Appendix Table 2. Causes included in the 2016 Global Burden of Disease Study**

| Cause level | Cause                                                | Cause of death | Cause of burden |
|-------------|------------------------------------------------------|----------------|-----------------|
| 4           | Other meningitis, Oth Mng                            | X              | X               |
| 3           | Encephalitis, Enceph                                 | X              | X               |
| 3           | Diphtheria, Diphtheria                               | X              | X               |
| 3           | Whooping cough, Whooping                             | X              | X               |
| 3           | Tetanus, Tetanus                                     | X              | X               |
| 3           | Measles, Measles                                     | X              | X               |
| 3           | Varicella and herpes zoster, Varicella               | X              | X               |
| 2           | Neglected tropical diseases and malaria, NTD+Malaria | X              | X               |
| 3           | Malaria, Malaria                                     | X              | X               |
| 3           | Chagas disease, Chagas                               | X              | X               |
| 3           | Leishmaniasis, Leish                                 | X              | X               |
| 4           | Visceral leishmaniasis, Vis Leish                    | X              | X               |
| 4           | Cutaneous and mucocutaneous leishmaniasis, Cut Leish |                | X               |
| 3           | African trypanosomiasis, Afr Tryp                    | X              | X               |
| 3           | Schistosomiasis, Schisto                             | X              | X               |
| 3           | Cysticercosis, Cysticer                              | X              | X               |
| 3           | Cystic echinococcosis, Echino                        | X              | X               |
| 3           | Lymphatic filariasis, LF                             |                | X               |
| 3           | Onchocerciasis, Oncho                                |                | X               |
| 3           | Trachoma, Trachoma                                   |                | X               |
| 3           | Dengue, Dengue                                       | X              | X               |
| 3           | Yellow fever, Yellow Fev                             | X              | X               |
| 3           | Rabies, Rabies                                       | X              | X               |
| 3           | Intestinal nematode infections, Nematode             | X              | X               |
| 4           | Ascariasis, Ascaris                                  | X              | X               |
| 4           | Trichuriasis, Trichuria                              |                | X               |

**Appendix Table 2. Causes included in the 2016 Global Burden of Disease Study**

| Cause level | Cause                                                    | Cause of death | Cause of burden |
|-------------|----------------------------------------------------------|----------------|-----------------|
| 4           | Hookworm disease, Hookworm                               |                | X               |
| 3           | Food-borne trematodiasis, FB Trema                       |                | X               |
| 3           | Leprosy, Leprosy                                         |                | X               |
| 3           | Ebola, Ebola                                             | X              | X               |
| 3           | Zika virus, Zika                                         | X              | X               |
| 3           | Guinea worm disease, GWD                                 |                | X               |
| 3           | Other neglected tropical diseases, Oth NTD               | X              | X               |
| 2           | Maternal disorders, Maternal                             | X              | X               |
| 3           | Maternal hemorrhage, Mat Hem                             | X              | X               |
| 3           | Maternal sepsis, Mat Sepsis                              | X              | X               |
| 3           | Maternal hypertensive, Mat HTN                           | X              | X               |
| 3           | Maternal obstructed labor, Obst Labor                    | X              | X               |
| 3           | Maternal abortion, Comp Abort                            | X              | X               |
| 3           | Indirect maternal deaths, Mat Indir                      | X              |                 |
| 3           | Late maternal deaths, Mat Late                           | X              |                 |
| 3           | Maternal HIV/AIDS, Mat HIV                               | X              |                 |
| 3           | Other maternal disorders, Oth Mat                        | X              | X               |
| 2           | Neonatal disorders, Neonatal                             | X              | X               |
| 3           | Neonatal preterm birth complications, NN Preterm         | X              | X               |
| 3           | Neonatal encephalopathy, NN Enceph                       | X              | X               |
| 3           | Neonatal sepsis and other neonatal infections, NN Sepsis | X              | X               |
| 3           | Hemolytic disease and other neonatal jaundice, NN Hemol  | X              | X               |
| 3           | Other neonatal disorders, Oth NN                         | X              | X               |
| 2           | Nutritional deficiencies, Nutr Def                       | X              | X               |
| 3           | Protein-energy malnutrition, PEM                         | X              | X               |
| 3           | Iodine deficiency, Iodine                                | X              | X               |

**Appendix Table 2. Causes included in the 2016 Global Burden of Disease Study**

| Cause level | Cause                                                                         | Cause of death | Cause of burden |
|-------------|-------------------------------------------------------------------------------|----------------|-----------------|
| 3           | Vitamin A deficiency, Vit A Iron-                                             |                | X               |
| 3           | deficiency anaemia, Iron                                                      | X              | X               |
| 3           | Other nutritional deficiencies, Oth Nutr                                      | X              | X               |
| 2           | Other communicable, maternal, neonatal, and nutritional diseases, Oth Group 1 | X              | X               |
| 3           | Sexually transmitted diseases excluding HIV, STDs                             | X              | X               |
| 4           | Syphilis, Syphilis                                                            | X              | X               |
| 4           | Chlamydial infection, Chlamydia                                               | X              | X               |
| 4           | Gonococcal infection, Gonorrhea                                               | X              | X               |
| 4           | Trichomoniasis, Trich                                                         |                | X               |
| 4           | Genital herpes, Herpes                                                        |                | X               |
| 4           | Other sexually transmitted diseases                                           | X              | X               |
| 3           | Hepatitis, Hep                                                                | X              | X               |
| 4           | Acute hepatitis A, Hep A                                                      | X              | X               |
| 4           | Hepatitis B, Hep B                                                            | X              | X               |
| 4           | Hepatitis C, Hep C                                                            | X              | X               |
| 4           | Acute hepatitis E, Hep E                                                      | X              | X               |
| 3           | Other infectious diseases, Other Inf                                          | X              | X               |
| 1           | Non-communicable diseases, NCDs                                               | X              | X               |
| 2           | Neoplasms                                                                     | X              | X               |
| 3           | Lip and oral cavity cancer                                                    | X              | X               |
| 3           | Nasopharynx cancer                                                            | X              | X               |
| 3           | Other pharynx cancer                                                          | X              | X               |
| 3           | Oesophageal cancer                                                            | X              | X               |
| 3           | Stomach cancer                                                                | X              | X               |
| 3           | Colon and rectum cancer                                                       | X              | X               |
| 3           | Liver cancer                                                                  | X              | X               |

**Appendix Table 2. Causes included in the 2016 Global Burden of Disease Study**

| Cause level | Cause                                              | Cause of death | Cause of burden |
|-------------|----------------------------------------------------|----------------|-----------------|
| 4           | Liver cancer due to hepatitis B                    | X              | X               |
| 4           | Liver cancer due to hepatitis C                    | X              | X               |
| 4           | Liver cancer due to alcohol use                    | X              | X               |
| 4           | Liver cancer due to other causes                   | X              | X               |
| 3           | Gallbladder and biliary tract cancer               | X              | X               |
| 3           | Pancreatic cancer                                  | X              | X               |
| 3           | Larynx cancer                                      | X              | X               |
| 3           | Tracheal, bronchus, and lung cancer, <b>Lung C</b> | X              | X               |
| 3           | Malignant skin melanoma                            | X              | X               |
| 3           | Non-melanoma skin cancer                           | X              | X               |
| 4           | Non-melanoma skin cancer (squamous-cell carcinoma) | X              | X               |
| 4           | Non-melanoma skin cancer (basal-cell carcinoma)    |                | X               |
| 3           | Breast cancer, Breast C                            | X              | X               |
| 3           | Cervical cancer, Cervical C                        | X              | X               |
| 3           | Uterine cancer                                     | X              | X               |
| 3           | Ovarian cancer                                     | X              | X               |
| 3           | Prostate cancer                                    | X              | X               |
| 3           | Testicular cancer                                  | X              | X               |
| 3           | Kidney cancer                                      | X              | X               |
| 3           | Bladder cancer                                     | X              | X               |
| 3           | Brain and nervous system cancer                    | X              | X               |
| 3           | Thyroid cancer                                     | X              | X               |
| 3           | Mesothelioma                                       | X              | X               |
| 3           | Hodgkin lymphoma                                   | X              | X               |
| 3           | Non-Hodgkin's lymphoma                             | X              | X               |
| 3           | Multiple myeloma                                   | X              | X               |

**Appendix Table 2. Causes included in the 2016 Global Burden of Disease Study**

| Cause level | Cause                                         | Cause of death | Cause of burden |
|-------------|-----------------------------------------------|----------------|-----------------|
| 3           | Leukaemia                                     | X              | X               |
| 4           | Acute lymphoid leukaemia                      | X              | X               |
| 4           | Chronic lymphoid leukaemia                    | X              | X               |
| 4           | Acute myeloid leukaemia                       | X              | X               |
| 4           | Chronic myeloid leukaemia                     | X              | X               |
| 4           | Other leukaemia                               | X              | X               |
| 3           | Other neoplasms                               | X              | X               |
| 2           | Cardiovascular diseases, CVD                  | X              | X               |
| 3           | Rheumatic heart disease, RHD                  | X              | X               |
| 3           | Ischaemic heart disease, IHD                  | X              | X               |
| 3           | Cerebrovascular disease, Stroke               | X              | X               |
| 4           | Ischaemic stroke, Isch Stroke                 | X              | X               |
| 4           | Hemorrhagic stroke, Hem Stroke                | X              | X               |
| 3           | Hypertensive heart disease, HTN HD            | X              | X               |
| 3           | Cardiomyopathy and myocarditis, CMP           | X              | X               |
| 4           | Myocarditis, Myocarditis                      | X              | X               |
| 4           | Alcoholic cardiomyopathy, Alcohol CMP         | X              | X               |
| 4           | Other cardiomyopathy, Other CMP               | X              | X               |
| 3           | Atrial fibrillation and flutter, A Fib        | X              | X               |
| 3           | Aortic aneurysm, Aort An                      | X              |                 |
| 3           | Peripheral vascular disease, PAD              | X              | X               |
| 3           | Endocarditis, Endocar                         | X              | X               |
| 3           | Other cardiovascular and circulatory diseases | X              | X               |
| 2           | Chronic respiratory diseases                  | X              | X               |
| 3           | Chronic obstructive pulmonary disease, COPD   | X              | X               |
| 3           | Pneumoconiosis, Pneumo                        | X              | X               |



**Appendix Table 2. Causes included in the 2016 Global Burden of Disease Study**

| Cause level | Cause                                                          | Cause of death | Cause of burden |
|-------------|----------------------------------------------------------------|----------------|-----------------|
| 4           | Silicosis, Silicosis                                           | X              | X               |
| 4           | Asbestosis, Asbestosis                                         | X              | X               |
| 4           | Coal workers pneumoconiosis, Coal W                            | X              | X               |
| 4           | Other pneumoconiosis, Other Pneum                              | X              | X               |
| 3           | Asthma, Asthma                                                 | X              | X               |
| 3           | Interstitial lung disease and pulmonary sarcoidosis, ILD       | X              | X               |
| 3           | Other chronic respiratory diseases, Oth Resp                   | X              | X               |
| 2           | Cirrhosis and other chronic liver diseases, Cirrhosis          | X              | X               |
| 3           | Cirrhosis and other chronic liver diseases due to hepatitis B  | X              | X               |
| 3           | Cirrhosis and other chronic liver diseases due to hepatitis C  | X              | X               |
| 3           | Cirrhosis and other chronic liver diseases due to alcohol use  | X              | X               |
| 3           | Cirrhosis and other chronic liver diseases due to other causes | X              | X               |
| 2           | Digestive diseases, Digestive                                  | X              | X               |
| 3           | Peptic ulcer disease, PUD                                      | X              | X               |
| 3           | Gastritis and duodenitis, Gastritis                            | X              | X               |
| 3           | Appendicitis, Appendicit                                       | X              | X               |
| 3           | Paralytic ileus and intestinal obstruction, Ileus              | X              | X               |
| 3           | Inguinal, femoral, and abdominal hernia, Hernia                | X              | X               |
| 3           | Inflammatory bowel disease, IBD                                | X              | X               |
| 3           | Vascular intestinal disorders , Vasc Intest                    | X              | X               |
| 3           | Gallbladder and biliary diseases, Gall Bile                    | X              | X               |
| 3           | Pancreatitis, Pancreatit                                       | X              | X               |
| 3           | Other digestive diseases, Other digest                         | X              | X               |
| 2           | Neurological disorders, Neuro                                  | X              | X               |
| 3           | Alzheimer's disease and other dementias, Alzheimer             | X              | X               |
| 3           | Parkinson's disease, Parkinson                                 | X              | X               |

**Appendix Table 2. Causes included in the 2016 Global Burden of Disease Study**

| Cause level | Cause                                                             | Cause of death | Cause of burden |
|-------------|-------------------------------------------------------------------|----------------|-----------------|
| 3           | Epilepsy, Epilepsy                                                | X              | X               |
| 3           | Multiple sclerosis, MS                                            | X              | X               |
| 3           | Motor neuron disease, ALS                                         | X              | X               |
| 3           | Migraine, Migraine                                                |                | X               |
| 3           | Tension-type headache, Tens head                                  |                | X               |
| 3           | Other neurological disorders, Oth Neuro                           | X              | X               |
| 2           | Mental and substance use disorders, Mental                        | X              | X               |
| 3           | Schizophrenia, Schiz                                              |                | X               |
| 3           | Alcohol use disorders, Alcohol                                    | X              | X               |
| 3           | Drug use disorders, Drugs                                         | X              | X               |
| 4           | Opioid use disorders, Opioids                                     | X              | X               |
| 4           | Cocaine use disorders, Cocaine                                    | X              | X               |
| 4           | Amphetamine use disorders, Amphet                                 | X              | X               |
| 4           | Cannabis use disorders, Cannabis                                  |                | X               |
| 4           | Other drug use disorders, Oth Drug                                | X              | X               |
| 3           | Depressive disorders, Depression                                  |                | X               |
| 4           | Major depressive disorder, MDD                                    |                | X               |
| 4           | Dysthymia, Dysthymia                                              |                | X               |
| 3           | Bipolar disorder, Bipolar                                         |                | X               |
| 3           | Anxiety disorders, Anxiety                                        |                | X               |
| 3           | Eating disorders, Eating                                          | X              | X               |
| 4           | Anorexia nervosa, Anorexia                                        | X              | X               |
| 4           | Bulimia nervosa, Bulimia                                          | X              | X               |
| 3           | Autistic spectrum disorders, ASD                                  |                | X               |
| 4           | Autism, Autism                                                    |                | X               |
| 4           | Asperger syndrome and other autistic spectrum disorders, Asperger |                | X               |

**Appendix Table 2. Causes included in the 2016 Global Burden of Disease Study**

| Cause level | Cause                                                | Cause of death | Cause of burden |
|-------------|------------------------------------------------------|----------------|-----------------|
| 3           | Attention-deficit/hyperactivity disorder, ADHD       |                | X               |
| 3           | Conduct disorder, Conduct                            |                | X               |
| 3           | Idiopathic developmental intellectual disability, ID |                | X               |
| 3           | Other mental and substance use disorders, Oth Ment   |                | X               |
| 2           | Diabetes, urogenital, blood, and endocrine diseases  | X              | X               |
| 3           | Diabetes mellitus, Diabetes                          | X              | X               |
| 3           | Acute glomerulonephritis, AGN                        | X              | X               |
| 3           | Chronic kidney disease, CKD                          | X              | X               |
| 4           | Chronic kidney disease due to diabetes mellitus      | X              | X               |
| 4           | Chronic kidney disease due to hypertension           | X              | X               |
| 4           | Chronic kidney disease due to glomerulonephritis     | X              | X               |
| 4           | Chronic kidney disease due to other causes           | X              | X               |
| 3           | Urinary diseases and male infertility                | X              | X               |
| 4           | Interstitial nephritis and urinary tract infections  | X              | X               |
| 4           | Urolithiasis, Urolith                                | X              | X               |
| 4           | Benign prostatic hyperplasia, BPH                    |                | X               |
| 4           | Male infertility, Infert M                           |                | X               |
| 4           | Other urinary diseases, Oth Urin                     | X              | X               |
| 3           | Gynecological diseases                               | X              | X               |
| 4           | Uterine fibroids, Fibroids                           | X              | X               |
| 4           | Polycystic ovarian syndrome, PCOS                    | X              | X               |
| 4           | Female infertility, Infert F                         |                | X               |
| 4           | Endometriosis, Endo                                  | X              | X               |
| 4           | Genital prolapse, Prolapse                           | X              | X               |
| 4           | Premenstrual syndrome, PMS                           |                | X               |
| 4           | Other gynecological diseases, Other gyne             | X              | X               |

**Appendix Table 2. Causes included in the 2016 Global Burden of Disease Study**

| Cause level | Cause                                             | Cause of death | Cause of burden |
|-------------|---------------------------------------------------|----------------|-----------------|
| 3           | Hemoglobinopathies and hemolytic anaemias         | X              | X               |
| 4           | Thalassemias, Thalass                             | X              | X               |
| 4           | Thalassaemias trait, Thal trait                   |                | X               |
| 4           | Sickle cell disorders, Sickle                     | X              | X               |
| 4           | Sickle cell trait, Sickle trait                   |                | X               |
| 4           | G6PD deficiency, G6PD                             | X              | X               |
| 4           | G6PD trait, G6PD trait                            |                | X               |
| 4           | Other hemoglobinopathies and                      |                | X               |
| 4           | hemolytic anaemias, Oth Hem                       | X              | X               |
| 3           | Endocrine, metabolic, blood, and immune disorders | X              | X               |
| 2           | Musculoskeletal disorders, MSK                    | X              | X               |
| 3           | Rheumatoid arthritis, Rheu Arth                   | X              | X               |
| 3           | Osteoarthritis, Osteoarth                         |                | X               |
| 3           | Low back and neck pain, Back+Neck                 |                | X               |
| 4           | Low back pain, Back pain                          |                | X               |
| 4           | Neck pain, Neck pain                              |                | X               |
| 3           | Gout                                              |                | X               |
| 3           | Other musculoskeletal disorders, Oth MSK          | X              | X               |
| 2           | Other non-communicable diseases, Oth NCDs         | X              | X               |
| 3           | Congenital anomalies                              | X              | X               |
| 4           | Neural tube defects                               | X              | X               |
| 4           | Congenital heart anomalies                        | X              | X               |
| 4           | Orofacial clefts                                  | X              | X               |
| 4           | Down's syndrome                                   | X              | X               |
| 4           | Turner syndrome                                   |                | X               |
| 4           | Klinefelter syndrome                              |                | X               |
| 4           | Other chromosomal abnormalities                   | X              | X               |

**Appendix Table 2. Causes included in the 2016 Global Burden of Disease Study**

| Cause level | Cause                                         | Cause of death | Cause of burden |
|-------------|-----------------------------------------------|----------------|-----------------|
| 4           | Congenital musculoskeletal and limb anomalies | X              | X               |
| 4           | Urogenital congenital anomalies               | X              | X               |
| 4           | Digestive congenital anomalies                | X              | X               |
| 4           | Other congenital anomalies                    | X              | X               |
| 3           | Skin and subcutaneous diseases                | X              | X               |
| 4           | Eczema                                        |                | X               |
| 4           | Psoriasis                                     |                | X               |
| 4           | Cellulitis                                    | X              | X               |
| 4           | Pyoderma                                      | X              | X               |
| 4           | Scabies                                       |                | X               |
| 4           | Fungal skin diseases                          |                | X               |
| 4           | Viral skin diseases                           |                | X               |
| 4           | Acne vulgaris                                 |                | X               |
| 4           | Alopecia areata                               |                | X               |
| 4           | Pruritus                                      |                | X               |
| 4           | Urticaria                                     |                | X               |
| 4           | Decubitus ulcer                               | X              | X               |
| 4           | Other skin and subcutaneous diseases          | X              | X               |
| 3           | Sense organ diseases                          |                | X               |
| 4           | Glaucoma                                      |                | X               |
| 4           | Cataract                                      |                | X               |
| 4           | Macular degeneration                          |                | X               |
| 4           | Refraction and accommodation disorders        |                | X               |
| 4           | Age-related and other hearing loss            |                | X               |
| 4           | Other vision loss                             |                | X               |
| 4           | Other sense organ diseases                    |                | X               |

**Appendix Table 2. Causes included in the 2016 Global Burden of Disease Study**

| Cause level | Cause                                | Cause of death | Cause of burden |
|-------------|--------------------------------------|----------------|-----------------|
| 3           | Oral disorders, Oral                 |                | X               |
| 4           | Deciduous caries                     |                | X               |
| 4           | Permanent caries                     |                | X               |
| 4           | Periodontal disease                  |                | X               |
| 4           | Edentulism and severe tooth loss     |                | X               |
| 4           | Other oral disorders                 |                | X               |
| 3           | Sudden infant death syndrome, SIDs   | X              |                 |
| 1           | Injuries                             | X              | X               |
| 2           | Transport injuries                   | X              | X               |
| 3           | Road injuries, Road injury           | X              | X               |
| 4           | Pedestrian road injuries             | X              | X               |
| 4           | Cyclist road injuries                | X              | X               |
| 4           | Motorcyclist road injuries           | X              | X               |
| 4           | Motor vehicle road injuries          | X              | X               |
| 4           | Other road injuries                  | X              | X               |
| 3           | Other transport injuries             | X              | X               |
| 2           | Unintentional injuries               | X              | X               |
| 3           | Falls                                | X              | X               |
| 3           | Drowning                             | X              | X               |
| 3           | Fire, heat, and hot substances       | X              | X               |
| 3           | Poisonings                           | X              | X               |
| 3           | Exposure to mechanical forces        | X              | X               |
| 4           | Unintentional firearm injuries       | X              | X               |
| 4           | Unintentional suffocation            | X              | X               |
| 4           | Other exposure to mechanical forces  | X              | X               |
| 3           | Adverse effects of medical treatment | X              | X               |

**Appendix Table 2. Causes included in the 2016 Global Burden of Disease Study**

| Cause level | Cause                                                                        | Cause of death | Cause of burden |
|-------------|------------------------------------------------------------------------------|----------------|-----------------|
| 3           | Animal contact                                                               | X              | X               |
| 4           | Venomous animal contact                                                      | X              | X               |
| 4           | Non-venomous animal contact                                                  | X              | X               |
| 3           | Foreign body                                                                 | X              | X               |
| 4           | Pulmonary aspiration and foreign body in airway                              | X              | X               |
| 4           | Foreign body in eyes                                                         |                | X               |
| 4           | Foreign body in other body part                                              | X              | X               |
| 3           | Environmental heat and cold exposure                                         | X              | X               |
| 3           | Other unintentional injuries                                                 | X              | X               |
| 2           | Self-harm and interpersonal violence                                         | X              | X               |
| 3           | Self-harm                                                                    | X              | X               |
| 4           | Self-harm by firearm                                                         | X              | X               |
| 4           | Self-harm by other specified means                                           | X              | X               |
| 3           | Interpersonal violence                                                       | X              | X               |
| 4           | Assault by firearm                                                           | X              | X               |
| 4           | Assault by sharp object                                                      | X              | X               |
| 4           | Sexual violence                                                              |                | X               |
| 4           | Assault by other means                                                       | X              | X               |
| 2           | Forces of nature, conflict and terrorism, and executions and police conflict | X              | X               |
| 3           | Exposure to forces of nature                                                 | X              | X               |
| 3           | Conflict and terrorism                                                       | X              | X               |
| 3           | Executions and police conflict                                               | X              | X               |

**Appendix Table 3: CoDCorrect cause hierarchy with levels**

| Cause name                                                         | CoDCorrect level |
|--------------------------------------------------------------------|------------------|
| All causes                                                         | 0                |
| Tuberculosis                                                       | 1                |
| Drug-sensitive tuberculosis                                        | 2                |
| Multidrug-resistant tuberculosis without extensive drug resistance | 2                |
| Extensively drug-resistant tuberculosis                            | 2                |
| Diarrhoeal diseases                                                | 1                |
| Typhoid fever                                                      | 1                |
| Paratyphoid fever                                                  | 1                |
| Other intestinal infectious diseases                               | 1                |
| Lower respiratory infections                                       | 1                |
| Upper respiratory infections                                       | 1                |
| Otitis media                                                       | 1                |
| Meningitis                                                         | 1                |
| Pneumococcal meningitis                                            | 2                |
| H influenzae type B meningitis                                     | 2                |
| Meningococcal infection                                            | 2                |
| Other meningitis                                                   | 2                |
| Encephalitis                                                       | 1                |
| Diphtheria                                                         | 1                |
| Whooping cough                                                     | 1                |
| Tetanus                                                            | 1                |
| Measles                                                            | 1                |
| Varicella and herpes zoster                                        | 1                |
| Malaria                                                            | 1                |
| Chagas disease                                                     | 1                |
| Visceral leishmaniasis                                             | 1                |
| African trypanosomiasis                                            | 1                |
| Schistosomiasis                                                    | 1                |
| Cysticercosis                                                      | 1                |
| Cystic echinococcosis                                              | 1                |
| Dengue                                                             | 1                |
| Yellow fever                                                       | 1                |
| Rabies                                                             | 1                |
| Intestinal nematode infections                                     | 1                |
| Ascariasis                                                         | 2                |
| Zika virus                                                         | 1                |
| Other neglected tropical diseases                                  | 1                |
| Maternal disorders                                                 | 1                |
| Maternal haemorrhage                                               | 2                |
| Maternal sepsis and other pregnancy related infections             | 2                |
| Maternal hypertensive disorders                                    | 2                |
| Maternal obstructed labour and uterine rupture                     | 2                |
| Maternal abortion, miscarriage, and ectopic pregnancy              | 2                |



**Appendix Table 3: CoDCorrect cause hierarchy with levels**

| Cause name                                               | CoDCorrect level |
|----------------------------------------------------------|------------------|
| Indirect maternal deaths                                 | 2                |
| Late maternal deaths                                     | 2                |
| Maternal deaths aggravated by HIV/AIDS                   | 2                |
| Other maternal disorders                                 | 2                |
| Neonatal disorders                                       | 1                |
| Neonatal preterm birth complications                     | 2                |
| Neonatal encephalopathy due to birth asphyxia and trauma | 2                |
| Neonatal sepsis and other neonatal infections            | 2                |
| Hemolytic disease and other neonatal jaundice            | 2                |
| Other neonatal disorders                                 | 2                |
| Nutritional deficiencies                                 | 1                |
| Protein-energy malnutrition                              | 2                |
| Iodine deficiency                                        | 2                |
| Iron-deficiency anaemia                                  | 2                |
| Other nutritional deficiencies                           | 2                |
| Sexually transmitted diseases excluding HIV              | 1                |
| Syphilis                                                 | 2                |
| Chlamydial infection                                     | 2                |
| Gonococcal infection                                     | 2                |
| Other sexually transmitted diseases                      | 2                |
| Hepatitis                                                | 1                |
| Acute hepatitis A                                        | 2                |
| Hepatitis B                                              | 2                |
| Hepatitis C                                              | 2                |
| Acute hepatitis E                                        | 2                |
| Other infectious diseases                                | 1                |
| Lip and oral cavity cancer                               | 1                |
| Nasopharynx cancer                                       | 1                |
| Other pharynx cancer                                     | 1                |
| Oesophageal cancer                                       | 1                |
| Stomach cancer                                           | 1                |
| Colon and rectum cancer                                  | 1                |
| Liver cancer                                             | 1                |
| Liver cancer due to hepatitis B                          | 2                |
| Liver cancer due to hepatitis C                          | 2                |
| Liver cancer due to alcohol use                          | 2                |
| Liver cancer due to other causes                         | 2                |
| Gallbladder and biliary tract cancer                     | 1                |
| Pancreatic cancer                                        | 1                |
| Larynx cancer                                            | 1                |
| Tracheal, bronchus, and lung cancer                      | 1                |
| Malignant skin melanoma                                  | 1                |

**Appendix Table 3: CoDCorrect cause hierarchy with levels**

| Cause name                                         | CoDCorrect level |
|----------------------------------------------------|------------------|
| Non-melanoma skin cancer                           | 1                |
| Non-melanoma skin cancer (squamous-cell carcinoma) | 2                |
| Breast cancer                                      | 1                |
| Cervical cancer                                    | 1                |
| Uterine cancer                                     | 1                |
| Ovarian cancer                                     | 1                |
| Prostate cancer                                    | 1                |
| Testicular cancer                                  | 1                |
| Kidney cancer                                      | 1                |
| Bladder cancer                                     | 1                |
| Brain and nervous system cancer                    | 1                |
| Thyroid cancer                                     | 1                |
| Mesothelioma                                       | 1                |
| Hodgkin lymphoma                                   | 1                |
| Non-Hodgkin's lymphoma                             | 1                |
| Multiple myeloma                                   | 1                |
| Leukaemia                                          | 1                |
| Acute lymphoid leukaemia                           | 2                |
| Chronic lymphoid leukaemia                         | 2                |
| Acute myeloid leukaemia                            | 2                |
| Chronic myeloid leukaemia                          | 2                |
| Other leukaemia                                    | 2                |
| Other neoplasms                                    | 1                |
| Cardiovascular diseases                            | 1                |
| Rheumatic heart disease                            | 2                |
| Ischaemic heart disease                            | 2                |
| Cerebrovascular disease                            | 2                |
| Ischaemic stroke                                   | 3                |
| Hemorrhagic stroke                                 | 3                |
| Hypertensive heart disease                         | 2                |
| Cardiomyopathy and myocarditis                     | 2                |
| Myocarditis                                        | 3                |
| Alcoholic cardiomyopathy                           | 3                |
| Other cardiomyopathy                               | 3                |
| Atrial fibrillation and flutter                    | 2                |
| Aortic aneurysm                                    | 2                |
| Peripheral vascular disease                        | 2                |
| Endocarditis                                       | 2                |
| Other cardiovascular and circulatory diseases      | 2                |
| Chronic respiratory diseases                       | 1                |
| Chronic obstructive pulmonary disease              | 2                |
| Pneumoconiosis                                     | 2                |
| Silicosis                                          | 3                |
| Asbestosis                                         | 3                |

**Appendix Table 3. CoDCorrect cause hierarchy with levels**

| Cause name                                                     | CoDCorrect level |
|----------------------------------------------------------------|------------------|
| Coal workers pneumoconiosis                                    | 3                |
| Other pneumoconiosis                                           | 3                |
| Asthma                                                         | 2                |
| Interstitial lung disease and pulmonary sarcoidosis            | 2                |
| Other chronic respiratory diseases                             | 2                |
| Cirrhosis and other chronic liver diseases                     | 1                |
| Cirrhosis and other chronic liver diseases due to hepatitis B  | 2                |
| Cirrhosis and other chronic liver diseases due to hepatitis C  | 2                |
| Cirrhosis and other chronic liver diseases due to alcohol use  | 2                |
| Cirrhosis and other chronic liver diseases due to other causes | 2                |
| Digestive diseases                                             | 1                |
| Peptic ulcer disease                                           | 2                |
| Gastritis and duodenitis                                       | 2                |
| Appendicitis                                                   | 2                |
| Paralytic ileus and intestinal obstruction                     | 2                |
| Inguinal, femoral, and abdominal hernia                        | 2                |
| Inflammatory bowel disease                                     | 2                |
| Vascular intestinal disorders                                  | 2                |
| Gallbladder and biliary diseases                               | 2                |
| Pancreatitis                                                   | 2                |
| Other digestive diseases                                       | 2                |
| Alzheimer's disease and other dementias                        | 1                |
| Parkinson's disease                                            | 1                |
| Epilepsy                                                       | 1                |
| Multiple sclerosis                                             | 1                |
| Motor neuron disease                                           | 1                |
| Other neurological disorders                                   | 1                |
| Alcohol use disorders                                          | 1                |
| Drug use disorders                                             | 1                |
| Opioid use disorders                                           | 2                |
| Cocaine use disorders                                          | 2                |
| Amphetamine use disorders                                      | 2                |
| Other drug use disorders                                       | 2                |
| Eating disorders                                               | 1                |
| Anorexia nervosa                                               | 2                |
| Bulimia nervosa                                                | 2                |
| Diabetes mellitus                                              | 1                |
| Acute glomerulonephritis                                       | 1                |
| Chronic kidney disease                                         | 1                |
| Chronic kidney disease due to diabetes mellitus                | 2                |
| Chronic kidney disease due to hypertension                     | 2                |

**Appendix Table 3: CoDCorrect cause hierarchy with levels**

| Cause name                                          | CoDCorrect level |
|-----------------------------------------------------|------------------|
| Chronic kidney disease due to glomerulonephritis    | 2                |
| Chronic kidney disease due to other causes          | 2                |
| Urinary diseases and male infertility               | 1                |
| Interstitial nephritis and urinary tract infections | 2                |
| Urolithiasis                                        | 2                |
| Other urinary diseases                              | 2                |
| Gynecological diseases                              | 1                |
| Uterine fibroids                                    | 2                |
| Polycystic ovarian syndrome                         | 2                |
| Endometriosis                                       | 2                |
| Genital prolapse                                    | 2                |
| Other gynecological diseases                        | 2                |
| Hemoglobinopathies and hemolytic anaemias           | 1                |
| Thalassemias                                        | 2                |
| Sickle cell disorders                               | 2                |
| G6PD deficiency                                     | 2                |
| Other hemoglobinopathies and hemolytic anaemias     | 2                |
| Endocrine, metabolic, blood, and immune disorders   | 1                |
| Musculoskeletal disorders                           | 1                |
| Rheumatoid arthritis                                | 2                |
| Other musculoskeletal disorders                     | 2                |
| Congenital anomalies                                | 1                |
| Neural tube defects                                 | 2                |
| Congenital heart anomalies                          | 2                |
| Cleft lip and cleft palate                          | 2                |
| Down's syndrome                                     | 2                |
| Other chromosomal abnormalities                     | 2                |
| Congenital musculoskeletal and limb anomalies       | 2                |
| Urogenital congenital anomalies                     | 2                |
| Digestive congenital anomalies                      | 2                |
| Other congenital anomalies                          | 2                |
| Skin and subcutaneous diseases                      | 1                |
| Cellulitis                                          | 2                |
| Pyoderma                                            | 2                |
| Decubitus ulcer                                     | 2                |
| Other skin and subcutaneous diseases                | 2                |
| Sudden infant death syndrome                        | 1                |
| Transport injuries                                  | 1                |
| Road injuries                                       | 2                |
| Pedestrian road injuries                            | 3                |
| Cyclist road injuries                               | 3                |

**Appendix Table 3: CoDCorrect cause hierarchy with levels**

| Cause name                                      | CoDCorrect level |
|-------------------------------------------------|------------------|
| Motorcyclist road injuries                      | 3                |
| Motor vehicle road injuries                     | 3                |
| Other road injuries                             | 3                |
| Other transport injuries                        | 2                |
| Falls                                           | 1                |
| Drowning                                        | 1                |
| Fire, heat, and hot substances                  | 1                |
| Poisonings                                      | 1                |
| Unintentional firearm injuries                  | 1                |
| Unintentional suffocation                       | 1                |
| Other exposure to mechanical forces             | 1                |
| Adverse effects of medical treatment            | 1                |
| Animal contact                                  | 1                |
| Venomous animal contact                         | 2                |
| Non-venomous animal contact                     | 2                |
| Pulmonary aspiration and foreign body in airway | 1                |
| Foreign body in other body part                 | 1                |
| Environmental heat and cold exposure            | 1                |
| Other unintentional injuries                    | 1                |
| Self-harm                                       | 1                |
| Self-harm by firearm                            | 2                |
| Self-harm by other specified means              | 2                |
| Interpersonal violence                          | 1                |
| Assault by firearm                              | 2                |
| Assault by sharp object                         | 2                |
| Assault by other means                          | 2                |
| Executions and police conflict                  | 1                |

**Appendix Table 4: List of International Classification of Diseases (ICD) codes mapped to the Global Burden of Disease cause list for causes of death**

| Cause                                                                         | ICD10                                                                                                                                                                                                                                                                                                                                                                                                                                                                                                                                                                                                                                                                                                                                                                                                                                                                                                                                                                                                                                                                                                                                                                                                            | ICD9                                                                                                                                                                                                                                                                                                                                                                                                                                                                                                                                                                                                                                                                                          |
|-------------------------------------------------------------------------------|------------------------------------------------------------------------------------------------------------------------------------------------------------------------------------------------------------------------------------------------------------------------------------------------------------------------------------------------------------------------------------------------------------------------------------------------------------------------------------------------------------------------------------------------------------------------------------------------------------------------------------------------------------------------------------------------------------------------------------------------------------------------------------------------------------------------------------------------------------------------------------------------------------------------------------------------------------------------------------------------------------------------------------------------------------------------------------------------------------------------------------------------------------------------------------------------------------------|-----------------------------------------------------------------------------------------------------------------------------------------------------------------------------------------------------------------------------------------------------------------------------------------------------------------------------------------------------------------------------------------------------------------------------------------------------------------------------------------------------------------------------------------------------------------------------------------------------------------------------------------------------------------------------------------------|
| Communicable, maternal, neonatal, and nutritional diseases                    | A00-A00.9, A01.0-A14, A15-A28.9, A30-A30.9, A32-A39.9, A48.1-A48.2, A48.4-A48.5, A49.1, A50-A58, A60-A60.9, A63-A63.8, A65-A65.0, A68-A70, A74, A74.8-A75.9, A77-A96.9, A98-A98.8, B00-B06.9, B10-B10.8, B15-B17.9, B19-B27.9, B29.4, B33-B33.1, B33.3-B33.8, B47-B48.8, B50-B53.8, B55.0, B56-B57.5, B60-B60.8, B63, B65-B67.9, B69-B72.0, B74.3-B75, B77-B77.9, B83-B83.8, B90-B92, B94.1-B94.2, B95-B95.5, B97.4-B97.6, D50.1-D50.8, D51-D52.0, D52.8-D53.9, D64.3, E00-E02, E40-E46.9, E51-E61.9, E63-E64.0, E64.2-E64.9, F07.1, G00.0-G00.8, G03-G03.8, G04-G05.8, G14-G14.6, H70-H70.9, I00, I02, I02.9, I98.0-I98.1, J01-J01.9, J02.0, J03.0, J04.0, J05-J05.0, J09-J15.8, J16-J16.9, J20-J21.9, J36-J36.0, K67.0-K67.8, K71.2, K71.6, K74.7-K74.8, K75.3, K76.3, K77.0, K93.0-K93.1, M03.1, M12.1, M49.0-M49.1, M73.0-M73.1, M89.6, N74.1-N74.2, N96, N98-N98.9, O00-O07.9, O09-O16.9, O20-O26.9, O28-O36.9, O40-O48.1, O60-O77.9, O80-O92.7, O96-O98.6, O98.8-P04.2, P04.5-P05.9, P07-P15.9, P19-P22.9, P23.0-P23.4, P24-P29.9, P35-P37.2, P37.5-P39.9, P50-P61.9, P70, P70.3-P72.9, P74-P78.9, P80-P81.9, P83-P84, P90-P94.9, P96, P96.3-P96.4, P96.8, R19.7, U04-U04.9, U06-U06.9, U82-U89, Z16-Z16.3 | 001-001.9, 002.0-030.9, 032-034.9, 036-036.3, 036.5-037.9, 040, 040.1-041.0, 042-066.9, 070-074.1, 074.3-075.9, 078.3-078.7, 079-079.7, 080-083.9, 084.0-084.5, 084.7-084.9, 085.0, 086-088, 088.8-088.9, 090-101.6, 104-104.9, 120-124.9, 125.4-125.9, 127-127.1, 128-129.0, 136-136.2, 137-139.0, 244.2, 260-263.9, 265-269.9, 280.1-280.8, 281.0-281.9, 320.0-320.8, 321-323.9, 381-383.9, 390-390.9, 392, 392.9, 425.6, 461-461.9, 464.0, 464.2, 464.4, 464.8-464.9, 466-469, 470.0, 475-475.9, 476.9, 480-482.8, 483.0-483.9, 484.0-484.7, 487-489, 630-636.9, 638-638.9, 640-679.1, 716.0, 730.4-730.6, 760-760.6, 760.8-768, 768.2-770, 770.1-775, 775.4-779.3, 779.6-779.8, V09-V09.9 |
| HIV/AIDS and tuberculosis                                                     | A10-A14, A15-A19.9, B20-B24.9, B90-B90.9, K67.3, K93.0, M49.0, N74.1-N74.2, P37.0, U84.3                                                                                                                                                                                                                                                                                                                                                                                                                                                                                                                                                                                                                                                                                                                                                                                                                                                                                                                                                                                                                                                                                                                         | 010-019.9, 042-044.9, 137-137.9, 138.0-138.9, 730.4-730.6                                                                                                                                                                                                                                                                                                                                                                                                                                                                                                                                                                                                                                     |
| Tuberculosis                                                                  | A10-A14, A15-A19.9, B90-B90.9, K67.3, K93.0, M49.0, N74.1-N74.2, P37.0, U84.3                                                                                                                                                                                                                                                                                                                                                                                                                                                                                                                                                                                                                                                                                                                                                                                                                                                                                                                                                                                                                                                                                                                                    | 010-019.9, 137-137.9, 138.0-138.9, 730.4-730.6                                                                                                                                                                                                                                                                                                                                                                                                                                                                                                                                                                                                                                                |
| Drug-susceptible tuberculosis                                                 | A10-A14, A15-A19.9, B90-B90.9, K67.3, K93.0, M49.0, P37.0                                                                                                                                                                                                                                                                                                                                                                                                                                                                                                                                                                                                                                                                                                                                                                                                                                                                                                                                                                                                                                                                                                                                                        | 010-019.9                                                                                                                                                                                                                                                                                                                                                                                                                                                                                                                                                                                                                                                                                     |
| Multidrug-resistant tuberculosis without extensive drug resistance            | U84.3                                                                                                                                                                                                                                                                                                                                                                                                                                                                                                                                                                                                                                                                                                                                                                                                                                                                                                                                                                                                                                                                                                                                                                                                            |                                                                                                                                                                                                                                                                                                                                                                                                                                                                                                                                                                                                                                                                                               |
| Extensively drug-resistant tuberculosis                                       |                                                                                                                                                                                                                                                                                                                                                                                                                                                                                                                                                                                                                                                                                                                                                                                                                                                                                                                                                                                                                                                                                                                                                                                                                  |                                                                                                                                                                                                                                                                                                                                                                                                                                                                                                                                                                                                                                                                                               |
| HIV/AIDS                                                                      | B20-B24.9                                                                                                                                                                                                                                                                                                                                                                                                                                                                                                                                                                                                                                                                                                                                                                                                                                                                                                                                                                                                                                                                                                                                                                                                        | 042-044.9                                                                                                                                                                                                                                                                                                                                                                                                                                                                                                                                                                                                                                                                                     |
| Drug-susceptible HIV/AIDS - Tuberculosis                                      | B20.0                                                                                                                                                                                                                                                                                                                                                                                                                                                                                                                                                                                                                                                                                                                                                                                                                                                                                                                                                                                                                                                                                                                                                                                                            |                                                                                                                                                                                                                                                                                                                                                                                                                                                                                                                                                                                                                                                                                               |
| Multidrug-resistant HIV/AIDS - Tuberculosis without extensive drug resistance |                                                                                                                                                                                                                                                                                                                                                                                                                                                                                                                                                                                                                                                                                                                                                                                                                                                                                                                                                                                                                                                                                                                                                                                                                  |                                                                                                                                                                                                                                                                                                                                                                                                                                                                                                                                                                                                                                                                                               |
| Extensively drug-resistant HIV/AIDS - Tuberculosis                            |                                                                                                                                                                                                                                                                                                                                                                                                                                                                                                                                                                                                                                                                                                                                                                                                                                                                                                                                                                                                                                                                                                                                                                                                                  |                                                                                                                                                                                                                                                                                                                                                                                                                                                                                                                                                                                                                                                                                               |
| HIV/AIDS resulting in other diseases                                          | B20.1-B23.9, B24.0                                                                                                                                                                                                                                                                                                                                                                                                                                                                                                                                                                                                                                                                                                                                                                                                                                                                                                                                                                                                                                                                                                                                                                                               | 042-044.9                                                                                                                                                                                                                                                                                                                                                                                                                                                                                                                                                                                                                                                                                     |
| Diarrhea, lower respiratory, and other common infectious diseases             | A00-A00.9, A01.0-A09.9, A33-A37.9, A39-A39.9, A48.1, A70, A83-A87.9, B01-B02.9, B05-B05.9, B94.1, B97.4-B97.6, F07.1, G00.0-G00.8, G03-G03.8, G04-G05.8, H70-H70.9, J01-J01.9, J04.0, J05-J05.0, J09-J15.8, J16-J16.9, J20-J21.9, J36-J36.0, P23.0-P23.4, P35.8, R19.7, U04-U04.9                                                                                                                                                                                                                                                                                                                                                                                                                                                                                                                                                                                                                                                                                                                                                                                                                                                                                                                                | 001-001.9, 002.0-009.9, 032-033.9, 036-036.3, 036.5-037.9, 047-049.9, 052-053.9, 055-055.9, 062-064.9, 079.6, 139.0, 320.0-320.8, 321-323, 323.4-323.9, 381-383.9, 461-461.9, 464.0, 464.2, 464.4, 464.8-464.9, 466-469, 470.0, 475-475.9, 476.9, 480-482.8, 483.0-483.9, 484.0-484.3, 484.6-484.7, 487-489, 771.3                                                                                                                                                                                                                                                                                                                                                                            |
| Diarrheal diseases                                                            | A00-A00.9, A02-A04.1, A04.3, A04.5-A07, A07.2-A07.4, A08-A09.9, R19.7                                                                                                                                                                                                                                                                                                                                                                                                                                                                                                                                                                                                                                                                                                                                                                                                                                                                                                                                                                                                                                                                                                                                            | 001-001.9, 003-006.9, 007.4-007.8, 008.2-009.9                                                                                                                                                                                                                                                                                                                                                                                                                                                                                                                                                                                                                                                |
| Intestinal infectious diseases                                                | A01.0-A01.4, A04.2, A04.4, A07.0-A07.1, A07.8-A07.9                                                                                                                                                                                                                                                                                                                                                                                                                                                                                                                                                                                                                                                                                                                                                                                                                                                                                                                                                                                                                                                                                                                                                              | 002.0-002.9, 007-007.3, 007.9-008.1                                                                                                                                                                                                                                                                                                                                                                                                                                                                                                                                                                                                                                                           |
| Typhoid fever                                                                 | A01.0                                                                                                                                                                                                                                                                                                                                                                                                                                                                                                                                                                                                                                                                                                                                                                                                                                                                                                                                                                                                                                                                                                                                                                                                            | 002.0                                                                                                                                                                                                                                                                                                                                                                                                                                                                                                                                                                                                                                                                                         |
| Paratyphoid fever                                                             | A01.1-A01.4                                                                                                                                                                                                                                                                                                                                                                                                                                                                                                                                                                                                                                                                                                                                                                                                                                                                                                                                                                                                                                                                                                                                                                                                      | 002.1-002.9                                                                                                                                                                                                                                                                                                                                                                                                                                                                                                                                                                                                                                                                                   |
| Other intestinal infectious diseases                                          | A04.2, A04.4, A07.0-A07.1, A07.8-A07.9                                                                                                                                                                                                                                                                                                                                                                                                                                                                                                                                                                                                                                                                                                                                                                                                                                                                                                                                                                                                                                                                                                                                                                           | 007-007.3, 007.9-008.1                                                                                                                                                                                                                                                                                                                                                                                                                                                                                                                                                                                                                                                                        |
| Lower respiratory infections                                                  | A48.1, A70, B97.4-B97.6, J09-J15.8, J16-J16.9, J20-J21.9, P23.0-P23.4, U04-U04.9                                                                                                                                                                                                                                                                                                                                                                                                                                                                                                                                                                                                                                                                                                                                                                                                                                                                                                                                                                                                                                                                                                                                 | 079.6, 466-469, 470.0, 480-482.8, 483.0-483.9, 484.1-484.2, 484.6-484.7, 487-489                                                                                                                                                                                                                                                                                                                                                                                                                                                                                                                                                                                                              |
| Upper respiratory infections                                                  | J01-J01.9, J04.0, J05-J05.0, J36-J36.0                                                                                                                                                                                                                                                                                                                                                                                                                                                                                                                                                                                                                                                                                                                                                                                                                                                                                                                                                                                                                                                                                                                                                                           | 461-461.9, 464.0, 464.2, 464.4, 464.8-464.9, 475-475.9, 476.9                                                                                                                                                                                                                                                                                                                                                                                                                                                                                                                                                                                                                                 |
| Otitis media                                                                  | H70-H70.9                                                                                                                                                                                                                                                                                                                                                                                                                                                                                                                                                                                                                                                                                                                                                                                                                                                                                                                                                                                                                                                                                                                                                                                                        | 381-383.9                                                                                                                                                                                                                                                                                                                                                                                                                                                                                                                                                                                                                                                                                     |
| Meningitis                                                                    | A39-A39.9, A87-A87.9, G00.0-G00.8, G03-G03.8                                                                                                                                                                                                                                                                                                                                                                                                                                                                                                                                                                                                                                                                                                                                                                                                                                                                                                                                                                                                                                                                                                                                                                     | 036-036.3, 036.5-036.9, 047-049.9, 320.0-320.8, 321-322.9                                                                                                                                                                                                                                                                                                                                                                                                                                                                                                                                                                                                                                     |

| Appendix Table 4: List of International Classification of Diseases (ICD) codes mapped to the Global Burden of Disease cause list for causes of death |                                                                                                                                                                                                                                    |                                                                                                                                                                   |
|------------------------------------------------------------------------------------------------------------------------------------------------------|------------------------------------------------------------------------------------------------------------------------------------------------------------------------------------------------------------------------------------|-------------------------------------------------------------------------------------------------------------------------------------------------------------------|
| Cause                                                                                                                                                | ICD10                                                                                                                                                                                                                              | ICD9                                                                                                                                                              |
| Pneumococcal meningitis                                                                                                                              | G00.1                                                                                                                                                                                                                              | 320.1                                                                                                                                                             |
| H influenzae type B meningitis                                                                                                                       | G00.0                                                                                                                                                                                                                              | 320.0                                                                                                                                                             |
| Meningococcal meningitis                                                                                                                             | A39-A39.9                                                                                                                                                                                                                          | 036-036.3, 036.5-036.9                                                                                                                                            |
| Other meningitis                                                                                                                                     | A87-A87.9, G00.2-G00.8, G03-G03.8                                                                                                                                                                                                  | 047-049.9, 320.2-320.8, 321-322.9                                                                                                                                 |
| Encephalitis                                                                                                                                         | A83-A86.4, B94.1, F07.1, G04-G05.8                                                                                                                                                                                                 | 062-064.9, 139.0, 323, 323.4-323.9                                                                                                                                |
| Diphtheria                                                                                                                                           | A36-A36.9                                                                                                                                                                                                                          | 032-032.9                                                                                                                                                         |
| Whooping cough                                                                                                                                       | A37-A37.9                                                                                                                                                                                                                          | 033-033.9, 484.3                                                                                                                                                  |
| Tetanus                                                                                                                                              | A33-A35.0                                                                                                                                                                                                                          | 037-037.9, 771.3                                                                                                                                                  |
| Measles                                                                                                                                              | B05-B05.9                                                                                                                                                                                                                          | 055-055.9, 484.0                                                                                                                                                  |
| Varicella and herpes zoster                                                                                                                          | B01-B02.9, P35.8                                                                                                                                                                                                                   | 052-053.9                                                                                                                                                         |
| Neglected tropical diseases and malaria                                                                                                              | A30-A30.9, A68-A68.9, A69.2-A69.9, A75-A75.9, A77-A79.9, A82-A82.9, A90-A96.9, A98-A98.8, B33.0-B33.1, B50-B53.8, B55.0, B56-B57.5, B60-B60.8, B65-B67.9, B69-B72.0, B74.3-B75, B77-B77.9, B83-B83.8, B92, K93.1, P37.1, U06-U06.9 | 030-030.9, 060-061.8, 065-066.9, 071-071.9, 080-083.9, 084.0-084.5, 084.7-084.9, 085.0, 086-088, 088.8-088.9, 120-124.9, 125.4-125.9, 127-127.1, 128-129.0, 425.6 |
| Malaria                                                                                                                                              | B50-B53.8                                                                                                                                                                                                                          | 084.0-084.5, 084.7-084.9                                                                                                                                          |
| Leprosy                                                                                                                                              | A30-A30.9                                                                                                                                                                                                                          | 030-030.9                                                                                                                                                         |
| Chagas disease                                                                                                                                       | B57-B57.5, K93.1                                                                                                                                                                                                                   | 086-086.2, 086.9, 425.6                                                                                                                                           |
| Leishmaniasis                                                                                                                                        | B55.0                                                                                                                                                                                                                              | 085.0                                                                                                                                                             |
| Visceral leishmaniasis                                                                                                                               | B55.0                                                                                                                                                                                                                              | 085.0                                                                                                                                                             |
| African trypanosomiasis                                                                                                                              | B56-B56.9                                                                                                                                                                                                                          | 086.3-086.5                                                                                                                                                       |
| Schistosomiasis                                                                                                                                      | B65-B65.9                                                                                                                                                                                                                          | 120-120.9                                                                                                                                                         |
| Cysticercosis                                                                                                                                        | B69-B69.9                                                                                                                                                                                                                          | 123.1                                                                                                                                                             |
| Cystic echinococcosis                                                                                                                                | B67-B67.4, B67.8-B67.9                                                                                                                                                                                                             | 122-122.4, 122.8-122.9                                                                                                                                            |
| Dengue                                                                                                                                               | A90-A91.9                                                                                                                                                                                                                          | 061-061.8                                                                                                                                                         |
| Yellow fever                                                                                                                                         | A95-A95.9                                                                                                                                                                                                                          | 060-060.9                                                                                                                                                         |
| Rabies                                                                                                                                               | A82-A82.9                                                                                                                                                                                                                          | 071-071.9                                                                                                                                                         |
| Intestinal nematode infections                                                                                                                       | B77-B77.9                                                                                                                                                                                                                          | 127.0                                                                                                                                                             |
| Ascariasis                                                                                                                                           | B77-B77.9                                                                                                                                                                                                                          | 127.0                                                                                                                                                             |
| Ebola                                                                                                                                                | A98.4                                                                                                                                                                                                                              |                                                                                                                                                                   |
| Zika virus                                                                                                                                           | U06-U06.9                                                                                                                                                                                                                          |                                                                                                                                                                   |
| Other neglected tropical diseases                                                                                                                    | A68-A68.9, A69.2-A69.9, A75-A75.9, A77-A79.9, A92-A94.0, A96-A96.9, A98-A98.3, A98.5-A98.8, B33.0-B33.1, B60-B60.8, B67.5-B67.7, B70-B71.9, B74.3-B75, B83-B83.8, P37.1                                                            | 065-066.9, 080-083.9, 087-088, 088.8-088.9, 122.5-122.7, 123-123.0, 123.2-124.9, 125.4-125.6, 125.9, 127, 127.1, 128-129.0                                        |
| Maternal disorders                                                                                                                                   | N96, N98-N98.9, O00-O07.9, O09-O16.9, O20-O26.9, O28-O36.9, O40-O48.1, O60-O77.9, O80-O92.7, O96-O98.6, O98.8-O99.9                                                                                                                | 630-636.9, 638-638.9, 640-679.1                                                                                                                                   |
| Maternal hemorrhage                                                                                                                                  | O20-O20.9, O43.2, O44-O46.9, O62-O62.9, O67-O67.9, O70, O72-O72.3                                                                                                                                                                  | 640-641.9, 661-661.9, 665, 666-666.9                                                                                                                              |
| Maternal sepsis and other maternal infections                                                                                                        | O23-O23.9, O85-O86.8, O91-O91.2                                                                                                                                                                                                    | 659.3, 670-670.9                                                                                                                                                  |
| Maternal hypertensive disorders                                                                                                                      | O10-O16.9                                                                                                                                                                                                                          | 642-642.9                                                                                                                                                         |
| Maternal obstructed labor and uterine rupture                                                                                                        | O32-O33.9, O64-O66.9, O71-O71.9                                                                                                                                                                                                    | 652-653.9, 660-660.9, 665.0-665.3                                                                                                                                 |
| Maternal abortion, miscarriage, and ectopic pregnancy                                                                                                | N96, O00-O07.9                                                                                                                                                                                                                     | 630-636.9, 638-638.9, 646.3                                                                                                                                       |
| Indirect maternal deaths                                                                                                                             | O24-O25.3, O98-O98.6, O98.8-O99.9                                                                                                                                                                                                  | 646-646.2, 646.4-649.9                                                                                                                                            |
| Late maternal deaths                                                                                                                                 | O96-O97.9                                                                                                                                                                                                                          |                                                                                                                                                                   |
| Maternal deaths aggravated by HIV/AIDS                                                                                                               |                                                                                                                                                                                                                                    |                                                                                                                                                                   |
| Other maternal disorders                                                                                                                             | N98-N98.9, O09-O09.9, O21-O22.9, O26-O26.9, O28-O31.8, O34-O36.9, O40-O43.1, O43.8-O43.9, O47-O48.1, O60-O61.9, O63-O63.9, O68-O69.9, O70.0-O70.9, O73-O77.9, O80-O84.9, O87-O90.9, O92-O92.7                                      | 643-645.2, 650-651.9, 654-659.2, 659.4-659.9, 662-664.9, 665.4-665.9, 667-669.9, 671-679.1                                                                        |
| Neonatal disorders                                                                                                                                   | P00-P04.2, P04.5-P05.9, P07-P15.9, P19-P22.9, P24-P29.9, P36-P36.9, P38-P39.9, P50-P61.9, P70, P70.3-P72.9, P74-P78.9, P80-P81.9, P83-P84, P90-P94.9, P96, P96.3-P96.4, P96.8                                                      | 760-760.6, 760.8-768, 768.2-770, 770.1-771, 771.4-775, 775.4-779.3, 779.6-779.8                                                                                   |
| Neonatal preterm birth complications                                                                                                                 | P01.0-P01.1, P07-P07.3, P22-P22.9, P25-P28.9, P61.2, P77-P77.9                                                                                                                                                                     | 761.0-761.1, 765-765.9, 769-769.9, 770.2-770.9, 776.6, 777.5-777.6                                                                                                |
| Neonatal encephalopathy due to birth asphyxia and trauma                                                                                             | P01.7, P02-P03.9, P10-P15.9, P20-P21.9, P24-P24.9, P90-P91.9                                                                                                                                                                       | 761.7-763.9, 767-768, 768.2-768.9, 770.1, 772.1-772.9, 779.0-779.2                                                                                                |
| Neonatal sepsis and other neonatal infections                                                                                                        | P36-P36.9, P38-P39.9                                                                                                                                                                                                               | 771.4-771.9                                                                                                                                                       |
| Hemolytic disease and other neonatal jaundice                                                                                                        | P55-P59.9                                                                                                                                                                                                                          | 773-774.9                                                                                                                                                         |
| Other neonatal disorders                                                                                                                             | P00-P01, P01.2-P01.6, P01.8-P01.9, P04-P04.2, P04.5-P05.9, P08-P09, P19-P19.9, P29-P29.9, P50-P54.9, P60-P61.1, P61.3-P61.9, P70, P70.3-P72.9, P74-P76.9, P78-P78.9, P80-P81.9, P83-P84, P92-P94.9, P96, P96.3-P96.4, P96.8        | 760-760.6, 760.8-761, 761.2-761.6, 764-764.9, 766-766.9, 770, 771, 772-772.0, 775, 775.4-776.5, 776.7-777.4, 777.7-779, 779.3, 779.6-779.8                        |
| Nutritional deficiencies                                                                                                                             | D50.1-D50.8, D51-D52.0, D52.8-D53.9, D64.3, E00-E02, E40-E46.9, E51-E61.9, E63-E64.0, E64.2-E64.9, M12.1                                                                                                                           | 244.2, 260-263.9, 265-269.9, 280.1-280.8, 281.0-281.9, 716.0                                                                                                      |
| Protein-energy malnutrition                                                                                                                          | E40-E46.9, E64.0                                                                                                                                                                                                                   | 260-263.9                                                                                                                                                         |

**Appendix Table 4: List of International Classification of Diseases (ICD) codes mapped to the Global Burden of Disease cause list for causes of death**

| Cause                                                            | ICD10                                                                                                                                                                                                                                                                                                                                                                                                                                                                                                                                                                                                                                                                                                                                                                                                                                                                                                                                                                                                                                                                                                                                                                                                                                                                                                                                                                                                                                                                                                                                                                                                                                                                                                                                                                                                                                                                                                                                                                                                                                                                                                                                                                                                                                                                                                                                                                                                                                                                                      | ICD9                                                                                                                                                                                                                                                                                                                                                                                                                                                                                                                                                                                                                                                                                                                                                                                                                                                                                                                                                                                                                                                                                                                                                                                                                                                                                                                                                                                                                                                                                                                                                                                                                                                                                                                                                                                                                                                                                                        |
|------------------------------------------------------------------|--------------------------------------------------------------------------------------------------------------------------------------------------------------------------------------------------------------------------------------------------------------------------------------------------------------------------------------------------------------------------------------------------------------------------------------------------------------------------------------------------------------------------------------------------------------------------------------------------------------------------------------------------------------------------------------------------------------------------------------------------------------------------------------------------------------------------------------------------------------------------------------------------------------------------------------------------------------------------------------------------------------------------------------------------------------------------------------------------------------------------------------------------------------------------------------------------------------------------------------------------------------------------------------------------------------------------------------------------------------------------------------------------------------------------------------------------------------------------------------------------------------------------------------------------------------------------------------------------------------------------------------------------------------------------------------------------------------------------------------------------------------------------------------------------------------------------------------------------------------------------------------------------------------------------------------------------------------------------------------------------------------------------------------------------------------------------------------------------------------------------------------------------------------------------------------------------------------------------------------------------------------------------------------------------------------------------------------------------------------------------------------------------------------------------------------------------------------------------------------------|-------------------------------------------------------------------------------------------------------------------------------------------------------------------------------------------------------------------------------------------------------------------------------------------------------------------------------------------------------------------------------------------------------------------------------------------------------------------------------------------------------------------------------------------------------------------------------------------------------------------------------------------------------------------------------------------------------------------------------------------------------------------------------------------------------------------------------------------------------------------------------------------------------------------------------------------------------------------------------------------------------------------------------------------------------------------------------------------------------------------------------------------------------------------------------------------------------------------------------------------------------------------------------------------------------------------------------------------------------------------------------------------------------------------------------------------------------------------------------------------------------------------------------------------------------------------------------------------------------------------------------------------------------------------------------------------------------------------------------------------------------------------------------------------------------------------------------------------------------------------------------------------------------------|
| Iodine deficiency                                                | E00-E02                                                                                                                                                                                                                                                                                                                                                                                                                                                                                                                                                                                                                                                                                                                                                                                                                                                                                                                                                                                                                                                                                                                                                                                                                                                                                                                                                                                                                                                                                                                                                                                                                                                                                                                                                                                                                                                                                                                                                                                                                                                                                                                                                                                                                                                                                                                                                                                                                                                                                    | 244.2                                                                                                                                                                                                                                                                                                                                                                                                                                                                                                                                                                                                                                                                                                                                                                                                                                                                                                                                                                                                                                                                                                                                                                                                                                                                                                                                                                                                                                                                                                                                                                                                                                                                                                                                                                                                                                                                                                       |
| Iron-deficiency anemia                                           | D50.1-D50.8                                                                                                                                                                                                                                                                                                                                                                                                                                                                                                                                                                                                                                                                                                                                                                                                                                                                                                                                                                                                                                                                                                                                                                                                                                                                                                                                                                                                                                                                                                                                                                                                                                                                                                                                                                                                                                                                                                                                                                                                                                                                                                                                                                                                                                                                                                                                                                                                                                                                                | 280.1-280.8                                                                                                                                                                                                                                                                                                                                                                                                                                                                                                                                                                                                                                                                                                                                                                                                                                                                                                                                                                                                                                                                                                                                                                                                                                                                                                                                                                                                                                                                                                                                                                                                                                                                                                                                                                                                                                                                                                 |
| Other nutritional deficiencies                                   | D51-D52.0, D52.8-D53.9, D64.3, E51-E61.9, E63-E64, E64.2-E64.3, M12.1                                                                                                                                                                                                                                                                                                                                                                                                                                                                                                                                                                                                                                                                                                                                                                                                                                                                                                                                                                                                                                                                                                                                                                                                                                                                                                                                                                                                                                                                                                                                                                                                                                                                                                                                                                                                                                                                                                                                                                                                                                                                                                                                                                                                                                                                                                                                                                                                                      | 265-269.9, 281.0-281.9, 716.0                                                                                                                                                                                                                                                                                                                                                                                                                                                                                                                                                                                                                                                                                                                                                                                                                                                                                                                                                                                                                                                                                                                                                                                                                                                                                                                                                                                                                                                                                                                                                                                                                                                                                                                                                                                                                                                                               |
| Other communicable, maternal, neonatal, and nutritional diseases | A20-A28.9, A32-A32.9, A38-A38.9, A48.2, A48.4-A48.5, A49.1, A50-A58, A60-A60.9, A63-A63.8, A65-A65.0, A69-A69.1, A74, A74.8-A74.9, A80-A81.9, A88-A89.9, B00-B00.9, B03-B04, B06-B06.9, B10-B10.8, B15-B17.9, B19-B19.9, B25-B27.9, B29.4, B33, B33.3-B33.8, B47-B48.8, B63, B91, B94.2, B95-B95.5, G14-G14.6, I00, I02, I02.9, I98.0-I98.1, J02.0, J03.0, K67.0-K67.2, K67.8, K71.2, K71.6, K74.7-K74.8, K75.3, K76.3, K77.0, M03.1, M49.1, M73.0-M73.1, M89.6, P35-P35.3, P35.9, P37, P37.2, P37.5-P37.9, U82-U84, U85-U89, Z16-Z16.3                                                                                                                                                                                                                                                                                                                                                                                                                                                                                                                                                                                                                                                                                                                                                                                                                                                                                                                                                                                                                                                                                                                                                                                                                                                                                                                                                                                                                                                                                                                                                                                                                                                                                                                                                                                                                                                                                                                                                    | 020-029, 034-034.9, 040, 040.1-041.0, 045-046.9, 050-051.9, 054-054.9, 056-059.9, 070-070.9, 072-074.1, 074.3-075.9, 078.3-078.7, 079-079.5, 079.7, 090-101.6, 104-104.9, 136-136.2, 138, 139, 323.0-323.3, 390-390.9, 392, 392.9, 484.4-484.5, 771.0-771.2, V09-V09.9                                                                                                                                                                                                                                                                                                                                                                                                                                                                                                                                                                                                                                                                                                                                                                                                                                                                                                                                                                                                                                                                                                                                                                                                                                                                                                                                                                                                                                                                                                                                                                                                                                      |
| Sexually transmitted diseases excluding HIV                      | A50-A58, A60-A60.9, A63-A63.8, B63, I98.0, K67.0-K67.2, M03.1, M73.0-M73.1                                                                                                                                                                                                                                                                                                                                                                                                                                                                                                                                                                                                                                                                                                                                                                                                                                                                                                                                                                                                                                                                                                                                                                                                                                                                                                                                                                                                                                                                                                                                                                                                                                                                                                                                                                                                                                                                                                                                                                                                                                                                                                                                                                                                                                                                                                                                                                                                                 | 054.1, 090-099.9                                                                                                                                                                                                                                                                                                                                                                                                                                                                                                                                                                                                                                                                                                                                                                                                                                                                                                                                                                                                                                                                                                                                                                                                                                                                                                                                                                                                                                                                                                                                                                                                                                                                                                                                                                                                                                                                                            |
| Syphilis                                                         | A50-A53.9, I98.0, K67.2, M03.1, M73.1                                                                                                                                                                                                                                                                                                                                                                                                                                                                                                                                                                                                                                                                                                                                                                                                                                                                                                                                                                                                                                                                                                                                                                                                                                                                                                                                                                                                                                                                                                                                                                                                                                                                                                                                                                                                                                                                                                                                                                                                                                                                                                                                                                                                                                                                                                                                                                                                                                                      | 090-097.9                                                                                                                                                                                                                                                                                                                                                                                                                                                                                                                                                                                                                                                                                                                                                                                                                                                                                                                                                                                                                                                                                                                                                                                                                                                                                                                                                                                                                                                                                                                                                                                                                                                                                                                                                                                                                                                                                                   |
| Chlamydial infection                                             | A55-A56.8, K67.0                                                                                                                                                                                                                                                                                                                                                                                                                                                                                                                                                                                                                                                                                                                                                                                                                                                                                                                                                                                                                                                                                                                                                                                                                                                                                                                                                                                                                                                                                                                                                                                                                                                                                                                                                                                                                                                                                                                                                                                                                                                                                                                                                                                                                                                                                                                                                                                                                                                                           | 099                                                                                                                                                                                                                                                                                                                                                                                                                                                                                                                                                                                                                                                                                                                                                                                                                                                                                                                                                                                                                                                                                                                                                                                                                                                                                                                                                                                                                                                                                                                                                                                                                                                                                                                                                                                                                                                                                                         |
| Gonococcal infection                                             | A54-A54.9, K67.1, M73.0                                                                                                                                                                                                                                                                                                                                                                                                                                                                                                                                                                                                                                                                                                                                                                                                                                                                                                                                                                                                                                                                                                                                                                                                                                                                                                                                                                                                                                                                                                                                                                                                                                                                                                                                                                                                                                                                                                                                                                                                                                                                                                                                                                                                                                                                                                                                                                                                                                                                    | 098-098.9                                                                                                                                                                                                                                                                                                                                                                                                                                                                                                                                                                                                                                                                                                                                                                                                                                                                                                                                                                                                                                                                                                                                                                                                                                                                                                                                                                                                                                                                                                                                                                                                                                                                                                                                                                                                                                                                                                   |
| Other sexually transmitted diseases                              | A57-A58, A63-A63.8                                                                                                                                                                                                                                                                                                                                                                                                                                                                                                                                                                                                                                                                                                                                                                                                                                                                                                                                                                                                                                                                                                                                                                                                                                                                                                                                                                                                                                                                                                                                                                                                                                                                                                                                                                                                                                                                                                                                                                                                                                                                                                                                                                                                                                                                                                                                                                                                                                                                         | 099.0-099.9                                                                                                                                                                                                                                                                                                                                                                                                                                                                                                                                                                                                                                                                                                                                                                                                                                                                                                                                                                                                                                                                                                                                                                                                                                                                                                                                                                                                                                                                                                                                                                                                                                                                                                                                                                                                                                                                                                 |
| Hepatitis                                                        | B15-B17.9, B19-B19.9, B94.2, K71.2, K71.6, P35.3                                                                                                                                                                                                                                                                                                                                                                                                                                                                                                                                                                                                                                                                                                                                                                                                                                                                                                                                                                                                                                                                                                                                                                                                                                                                                                                                                                                                                                                                                                                                                                                                                                                                                                                                                                                                                                                                                                                                                                                                                                                                                                                                                                                                                                                                                                                                                                                                                                           | 070-070.9                                                                                                                                                                                                                                                                                                                                                                                                                                                                                                                                                                                                                                                                                                                                                                                                                                                                                                                                                                                                                                                                                                                                                                                                                                                                                                                                                                                                                                                                                                                                                                                                                                                                                                                                                                                                                                                                                                   |
| Acute hepatitis A                                                | B15-B15.9                                                                                                                                                                                                                                                                                                                                                                                                                                                                                                                                                                                                                                                                                                                                                                                                                                                                                                                                                                                                                                                                                                                                                                                                                                                                                                                                                                                                                                                                                                                                                                                                                                                                                                                                                                                                                                                                                                                                                                                                                                                                                                                                                                                                                                                                                                                                                                                                                                                                                  | 070.0-070.1                                                                                                                                                                                                                                                                                                                                                                                                                                                                                                                                                                                                                                                                                                                                                                                                                                                                                                                                                                                                                                                                                                                                                                                                                                                                                                                                                                                                                                                                                                                                                                                                                                                                                                                                                                                                                                                                                                 |
| Hepatitis B                                                      | B16-B16.9, B17.0, B19.1, P35.3                                                                                                                                                                                                                                                                                                                                                                                                                                                                                                                                                                                                                                                                                                                                                                                                                                                                                                                                                                                                                                                                                                                                                                                                                                                                                                                                                                                                                                                                                                                                                                                                                                                                                                                                                                                                                                                                                                                                                                                                                                                                                                                                                                                                                                                                                                                                                                                                                                                             | 070.2-070.3                                                                                                                                                                                                                                                                                                                                                                                                                                                                                                                                                                                                                                                                                                                                                                                                                                                                                                                                                                                                                                                                                                                                                                                                                                                                                                                                                                                                                                                                                                                                                                                                                                                                                                                                                                                                                                                                                                 |
| Hepatitis C                                                      | B17.1, B19.2                                                                                                                                                                                                                                                                                                                                                                                                                                                                                                                                                                                                                                                                                                                                                                                                                                                                                                                                                                                                                                                                                                                                                                                                                                                                                                                                                                                                                                                                                                                                                                                                                                                                                                                                                                                                                                                                                                                                                                                                                                                                                                                                                                                                                                                                                                                                                                                                                                                                               | 070.7                                                                                                                                                                                                                                                                                                                                                                                                                                                                                                                                                                                                                                                                                                                                                                                                                                                                                                                                                                                                                                                                                                                                                                                                                                                                                                                                                                                                                                                                                                                                                                                                                                                                                                                                                                                                                                                                                                       |
| Acute hepatitis E                                                | B17.2                                                                                                                                                                                                                                                                                                                                                                                                                                                                                                                                                                                                                                                                                                                                                                                                                                                                                                                                                                                                                                                                                                                                                                                                                                                                                                                                                                                                                                                                                                                                                                                                                                                                                                                                                                                                                                                                                                                                                                                                                                                                                                                                                                                                                                                                                                                                                                                                                                                                                      |                                                                                                                                                                                                                                                                                                                                                                                                                                                                                                                                                                                                                                                                                                                                                                                                                                                                                                                                                                                                                                                                                                                                                                                                                                                                                                                                                                                                                                                                                                                                                                                                                                                                                                                                                                                                                                                                                                             |
| Other infectious diseases                                        | A20-A28.9, A32-A32.9, A38-A38.9, A48.2, A48.4-A48.5, A49.1, A65-A65.0, A69-A69.1, A74, A74.8-A74.9, A80-A81.9, A88-A89.9, B00-B00.9, B03-B04, B06-B06.9, B10-B10.8, B25-B27.9, B29.4, B33, B33.3-B33.8, B47-B48.8, B91, B95-B95.5, G14-G14.6, I00, I02, I02.9, I98.1, J02.0, J03.0, K67.8, K74.7-K74.8, K75.3, K76.3, K77.0, M49.1, M89.6, P35-P35.2, P35.9, P37, P37.2, P37.5-P37.9, U82-U84, U85-U89, Z16-Z16.3                                                                                                                                                                                                                                                                                                                                                                                                                                                                                                                                                                                                                                                                                                                                                                                                                                                                                                                                                                                                                                                                                                                                                                                                                                                                                                                                                                                                                                                                                                                                                                                                                                                                                                                                                                                                                                                                                                                                                                                                                                                                          | 020-029, 034-034.9, 040, 040.1-041.0, 045-046.9, 050-051.9, 054-054.0, 054.2-054.9, 056-059.9, 072-074.1, 074.3-075.9, 078.3-078.7, 079-079.5, 079.7, 100-101.6, 104-104.9, 136-136.2, 138, 139, 323.0-323.3, 390-390.9, 392, 392.9, 484.4-484.5, 771.0-771.2, V09-V09.9                                                                                                                                                                                                                                                                                                                                                                                                                                                                                                                                                                                                                                                                                                                                                                                                                                                                                                                                                                                                                                                                                                                                                                                                                                                                                                                                                                                                                                                                                                                                                                                                                                    |
| Non-communicable diseases                                        | A46-A46.0, A66-A67.9, B18-B18.9, B33.2, B86, C00-C13.9, C15-C25.9, C30-C34.9, C37-C38.8, C40-C41.9, C43-C45.9, C47-C54.9, C56-C57.8, C58-C58.0, C60-C63.8, C64-C67.9, C68.0-C68.8, C69-C75.8, C81-C86.6, C88-C96.9, D00.1-D00.2, D01.0-D01.3, D02.0-D02.3, D03-D06.9, D07.0-D07.2, D07.4-D07.5, D09.0, D09.2-D09.3, D09.8, D10.0-D10.7, D11-D12.9, D13.0-D13.7, D14.0-D14.3, D15-D16.9, D22-D27.9, D28.0-D28.7, D29.0-D29.8, D30.0-D30.8, D31-D36, D36.1-D36.7, D37.1-D37.5, D38.0-D38.5, D39.1-D39.2, D39.8, D40.0-D40.8, D41.0-D41.8, D42-D43.9, D44.0-D44.8, D45-D47.0, D47.2-D47.9, D48.0-D48.6, D49.2-D49.4, D49.6, D52.1, D55-D58.9, D59.0-D59.3, D59.5-D59.6, D60-D61.9, D63.1, D64.0, D64.4, D66-D67, D68.0-D69.8, D70-D75.8, D76-D78.8, D86-D86.9, D89-D89.3, E03-E07.1, E09-E14.9, E15.0, E16.0-E16.9, E20-E34.8, E36-E36.8, E65-E68, E70-E85.2, E88-E89.9, F00-F03.9, F10-F16.9, F18-F19.9, F24, F50.0-F50.5, G10-G13.8, G20-G26.0, G30-G31.9, G35-G37.9, G40-G41.9, G45-G46.8, G47.3, G61-G61.9, G70-G73.7, G90-G90.9, G93.7, G95-G95.9, G97-G97.9, H05.0-H05.1, I01-I01.9, I02.0, I05-I09.9, I11-I13.9, I20-I25.9, I27.1, I28-I28.8, I30-I31.1, I31.8-I41.9, I42.1-I42.8, I43-I43.9, I47-I48.9, I51.0-I51.4, I60-I63.9, I65-I66.9, I67.0-I67.3, I67.5-I67.7, I68.0-I68.2, I69.0-I69.3, I70.2-I70.8, I71-I73.9, I77-I89.9, I95.2-I95.3, I97-I98, I98.2, I98.9, J30-J35.9, J37-I47.9, J60-J63.8, J65-J68.9, J70-J70.9, J82, J84-J84.9, J91-J92.9, J95-J95.9, K20-K29.9, K31-K31.8, K35-K38.9, K40-K46.9, K50-K52.9, K55-K62.9, K63.5, K64-K64.9, K66.8, K67, K68-K68.9, K70-K70.9, K71.3-K71.5, K71.7, K72.1-K74.6, K74.9, K75.1-K75.2, K75.4-K76.2, K76.4-K77, K77.8, K80-K83.9, K85-K86.9, K90-K91.9, K92.8, K93.8-K95.8, L00-L05.9, L08-L08.9, L10-L14.0, L51-L51.9, L88-L89.9, L93-L93.2, L97-L98.4, M00-M03.0, M03.2-M03.6, M05-M09.8, M30-M36.8, M40-M43.1, M65-M65.0, M71.0-M71.1, M72.5-M72.6, M80-M82.8, M86.3-M86.4, M87-M87.1, M88-M89.0, M89.5, M89.7-M89.9, N00-N08.8, N10-N12.9, N14-N16.8, N18-N18.9, N20-N23.0, N25-N28.1, N29-N32.0, N32.3-N32.4, N34-N34.3, N36-N36.9, N39-N39.2, N41-N41.9, N44-N44.0, N45-N45.9, N49-N49.9, N60-N60.9, N65-N65.1, N72-N72.0, N75-N77.8, N80-N81.9, N83-N83.9, N84.0-N84.1, N87-N87.9, N99-N99.9, P04.3-P04.4, P70.0-P70.2, P96.0-P96.2, P96.5, Q00-Q07.9, Q10.4-Q18.9, Q20-Q28.9, Q30-Q36, Q37-Q45.9, Q50-Q87.8, Q89-Q89.8, Q90-Q93.9, Q95-Q99.8, R50.2, R73-R73.9, R78.0-R78.5, R95-R95.9, X45-X45.9, X65-X65.9, Y15-Y15.9 | 035-035.9, 036.4, 074.2, 102-103.9, 133-133.6, 135-135.9, 136.6, 140-148.9, 150-158.9, 160-164.9, 170-175.9, 180-183.8, 184.0-184.4, 184.8, 185-186.9, 187.1-187.8, 188-188.9, 189.0-189.8, 190-194.8, 200-208.9, 209.0-209.1, 209.4-209.5, 210.0-210.9, 211.0-211.8, 212.0-212.8, 213-213.9, 217-220.9, 221.0-221.8, 222.0-222.8, 223.0-223.8, 224-228.9, 229.0, 229.8, 230.1-230.8, 231.0-231.2, 232-232.9, 233.0-233.2, 233.4-233.5, 233.7, 234.0-234.8, 235.0, 235.4, 235.6-235.8, 236.0-236.2, 236.4-236.5, 236.7, 237-237.3, 237.5-237.9, 238.0-238.9, 239.2-239.4, 239.6, 240-243.9, 244.0-244.1, 244.3-244.8, 245-246.9, 250-259.9, 270-273.9, 275-276, 277-277.2, 277.4-277.9, 278.0-278.8, 282-284.9, 286-286.5, 286.7-289.7, 290-292.9, 294.1-294.9, 303-303.9, 304.0-304.8, 305-305.9, 307.1, 327.2-327.8, 330-331.2, 331.5-337.9, 340-341.9, 345-345.9, 349, 349.2-349.8, 353.6-353.9, 356-356.9, 357.0-357.7, 358-359.9, 376.0-376.1, 391-391.9, 392.0, 393-398.9, 402-404.9, 410-414.9, 416.1, 417-417.9, 420-423, 423.1-424.9, 425.0-425.3, 425.5, 425.7-425.8, 427-427.3, 427.6-427.8, 429.0, 430-435.9, 437.0-437.2, 437.4-437.8, 440.2, 440.4, 441-443.9, 446-457, 457.1-457.9, 459, 459.1-459.3, 470, 470.9-474.9, 476-476.1, 477-479, 490-504.9, 506-506.9, 508-509, 515, 516-517.8, 518.6-518.7, 518.9, 519.0-519.4, 530-536.1, 536.4, 537-537.6, 537.8, 538-543.9, 550-553.6, 555-558.9, 560-560.3, 560.8-560.9, 562-562.1, 564-564.7, 565-566.9, 569.0-569.7, 571-571.9, 572.2-577.9, 579-583.9, 585-585.9, 588-590.9, 592-593.8, 594-599.6, 599.8, 601-602.9, 604-604.9, 608.2, 610-610.9, 617-618.9, 620-620.9, 621.4-621.9, 622.3-622.7, 629-629.8, 680-689, 694-695.5, 707-707.9, 710-711.9, 714-714.3, 714.8-714.9, 730.1, 732-732.9, 733.0-733.1, 740-749.0, 749.2-758.9, 759.0-759.8, 760.7, 775.0-775.3, 779.4-779.5, 787.1, 788.0, 790.2-790.3, 798-798.0, E850-E854, E860 |



**Appendix Table 4: List of International Classification of Diseases (ICD) codes mapped to the Global Burden of Disease cause list for causes of death**

| Cause                                              | ICD10                                                                                                                                                                                                                                                                                                                                                                                                                                                                                                                                                                                                                                                             | ICD9                                                                                                                                                                                                                                                                                                                                                                                                                                                                                                                                               |
|----------------------------------------------------|-------------------------------------------------------------------------------------------------------------------------------------------------------------------------------------------------------------------------------------------------------------------------------------------------------------------------------------------------------------------------------------------------------------------------------------------------------------------------------------------------------------------------------------------------------------------------------------------------------------------------------------------------------------------|----------------------------------------------------------------------------------------------------------------------------------------------------------------------------------------------------------------------------------------------------------------------------------------------------------------------------------------------------------------------------------------------------------------------------------------------------------------------------------------------------------------------------------------------------|
| Neoplasms                                          | C00-C13.9, C15-C25.9, C30-C34.9, C37-C38.8, C40-C41.9, C43-C45.9, C47-C54.9, C56-C57.8, C58-C58.0, C60-C63.8, C64-C67.9, C68.0-C68.8, C69-C75.8, C81-C86.6, C88-C96.9, D00.1-D00.2, D01.0-D01.3, D02.0-D02.3, D03-D06.9, D07.0-D07.2, D07.4-D07.5, D09.0, D09.2-D09.3, D09.8, D10.0-D10.7, D11-D12.9, D13.0-D13.7, D14.0-D14.3, D15-D16.9, D22-D24.9, D26.0, D27-D27.9, D28.0-D28.1, D28.7, D29.0-D29.8, D30.0-D30.8, D31-D36, D36.1-D36.7, D37.1-D37.5, D38.0-D38.5, D39.1-D39.2, D39.8, D40.0-D40.8, D41.0-D41.8, D42-D43.9, D44.0-D44.8, D45-D47.0, D47.2-D47.9, D48.0-D48.6, D49.2-D49.4, D49.6, K31.7, K62.0-K62.1, K63.5, N60-N60.9, N84.0-N84.1, N87-N87.9 | 140-148.9, 150-158.9, 160-164.9, 170-175.9, 180-183.8, 184.0-184.4, 184.8, 185-186.9, 187.1-187.8, 188-188.9, 189.0-189.8, 190-194.8, 200-208.9, 209.0-209.1, 209.4-209.5, 210.0-210.9, 211.0-211.8, 212.0-212.8, 213-213.9, 217-217.8, 219.0, 220-220.9, 221.0-221.8, 222.0-222.8, 223.0-223.8, 224-228.9, 229.0, 229.8, 230.1-230.8, 231.0-231.2, 232-232.9, 233.0-233.2, 233.4-233.5, 233.7, 234.0-234.8, 235.0, 235.4, 235.6-235.8, 236.1-236.2, 236.4-236.5, 236.7, 237-237.3, 237.5-237.9, 238.0-238.9, 239.2-239.4, 239.6, 569.0, 610-610.9 |
| Lip and oral cavity cancer                         | C00-C08.9, D10.0-D10.5, D11-D11.9                                                                                                                                                                                                                                                                                                                                                                                                                                                                                                                                                                                                                                 | 140-145.9, 210.0-210.6, 235.0                                                                                                                                                                                                                                                                                                                                                                                                                                                                                                                      |
| Nasopharynx cancer                                 | C11-C11.9, D10.6                                                                                                                                                                                                                                                                                                                                                                                                                                                                                                                                                                                                                                                  | 147-147.9, 210.7-210.9                                                                                                                                                                                                                                                                                                                                                                                                                                                                                                                             |
| Other pharynx cancer                               | C09-C10.9, C12-C13.9, D10.7                                                                                                                                                                                                                                                                                                                                                                                                                                                                                                                                                                                                                                       | 146-146.9, 148-148.9                                                                                                                                                                                                                                                                                                                                                                                                                                                                                                                               |
| Esophageal cancer                                  | C15-C15.9, D00.1, D13.0                                                                                                                                                                                                                                                                                                                                                                                                                                                                                                                                                                                                                                           | 150-150.9, 211.0, 230.1                                                                                                                                                                                                                                                                                                                                                                                                                                                                                                                            |
| Stomach cancer                                     | C16-C16.9, D00.2, D13.1, D37.1                                                                                                                                                                                                                                                                                                                                                                                                                                                                                                                                                                                                                                    | 151-151.9, 211.1, 230.2                                                                                                                                                                                                                                                                                                                                                                                                                                                                                                                            |
| Colon and rectum cancer                            | C18-C21.9, D01.0-D01.3, D12-D12.9, D37.3-D37.5                                                                                                                                                                                                                                                                                                                                                                                                                                                                                                                                                                                                                    | 153-154.9, 209.1, 209.5, 211.3-211.4, 230.3-230.6                                                                                                                                                                                                                                                                                                                                                                                                                                                                                                  |
| Liver cancer                                       | C22-C22.9, D13.4                                                                                                                                                                                                                                                                                                                                                                                                                                                                                                                                                                                                                                                  | 155-155.9, 211.5                                                                                                                                                                                                                                                                                                                                                                                                                                                                                                                                   |
| Liver cancer due to hepatitis B                    |                                                                                                                                                                                                                                                                                                                                                                                                                                                                                                                                                                                                                                                                   |                                                                                                                                                                                                                                                                                                                                                                                                                                                                                                                                                    |
| Liver cancer due to hepatitis C                    |                                                                                                                                                                                                                                                                                                                                                                                                                                                                                                                                                                                                                                                                   |                                                                                                                                                                                                                                                                                                                                                                                                                                                                                                                                                    |
| Liver cancer due to alcohol use                    |                                                                                                                                                                                                                                                                                                                                                                                                                                                                                                                                                                                                                                                                   |                                                                                                                                                                                                                                                                                                                                                                                                                                                                                                                                                    |
| Liver cancer due to other causes                   |                                                                                                                                                                                                                                                                                                                                                                                                                                                                                                                                                                                                                                                                   |                                                                                                                                                                                                                                                                                                                                                                                                                                                                                                                                                    |
| Gallbladder and biliary tract cancer               | C23-C24.9, D13.5                                                                                                                                                                                                                                                                                                                                                                                                                                                                                                                                                                                                                                                  | 156-156.9                                                                                                                                                                                                                                                                                                                                                                                                                                                                                                                                          |
| Pancreatic cancer                                  | C25-C25.9, D13.6-D13.7                                                                                                                                                                                                                                                                                                                                                                                                                                                                                                                                                                                                                                            | 157-157.9, 211.6-211.7                                                                                                                                                                                                                                                                                                                                                                                                                                                                                                                             |
| Larynx cancer                                      | C32-C32.9, D02.0, D14.1, D38.0                                                                                                                                                                                                                                                                                                                                                                                                                                                                                                                                                                                                                                    | 161-161.9, 212.1, 231.0, 235.6                                                                                                                                                                                                                                                                                                                                                                                                                                                                                                                     |
| Tracheal, bronchus, and lung cancer                | C33-C34.9, D02.1-D02.3, D14.2-D14.3, D38.1                                                                                                                                                                                                                                                                                                                                                                                                                                                                                                                                                                                                                        | 162-162.9, 212.2-212.3, 231.1-231.2, 235.7                                                                                                                                                                                                                                                                                                                                                                                                                                                                                                         |
| Malignant skin melanoma                            | C43-C43.9, D03-D03.9, D22-D23.9, D48.5                                                                                                                                                                                                                                                                                                                                                                                                                                                                                                                                                                                                                            | 172-172.9                                                                                                                                                                                                                                                                                                                                                                                                                                                                                                                                          |
| Non-melanoma skin cancer                           | C44-C44.9, D04-D04.9, D49.2                                                                                                                                                                                                                                                                                                                                                                                                                                                                                                                                                                                                                                       | 173-173.9, 222.4, 232-232.9, 238.2                                                                                                                                                                                                                                                                                                                                                                                                                                                                                                                 |
| Non-melanoma skin cancer (squamous-cell carcinoma) | C44-C44.9, D04-D04.9, D49.2                                                                                                                                                                                                                                                                                                                                                                                                                                                                                                                                                                                                                                       | 173-173.9, 222.4, 232-232.9, 238.2                                                                                                                                                                                                                                                                                                                                                                                                                                                                                                                 |
| Breast cancer                                      | C50-C50.9, D05-D05.9, D24-D24.9, D48.6, D49.3, N60-N60.9                                                                                                                                                                                                                                                                                                                                                                                                                                                                                                                                                                                                          | 174-175.9, 217-217.8, 233.0, 238.3, 239.3, 610-610.9                                                                                                                                                                                                                                                                                                                                                                                                                                                                                               |
| Cervical cancer                                    | C53-C53.9, D06-D06.9, D26.0                                                                                                                                                                                                                                                                                                                                                                                                                                                                                                                                                                                                                                       | 180-180.9, 219.0, 233.1                                                                                                                                                                                                                                                                                                                                                                                                                                                                                                                            |
| Uterine cancer                                     | C54-C54.9, D07.0-D07.2, N87-N87.9                                                                                                                                                                                                                                                                                                                                                                                                                                                                                                                                                                                                                                 | 182-182.8, 233.2                                                                                                                                                                                                                                                                                                                                                                                                                                                                                                                                   |
| Ovarian cancer                                     | C56-C56.9, D27-D27.9, D39.1                                                                                                                                                                                                                                                                                                                                                                                                                                                                                                                                                                                                                                       | 183-183.0, 220-220.9, 236.2                                                                                                                                                                                                                                                                                                                                                                                                                                                                                                                        |
| Prostate cancer                                    | C61-C61.9, D07.5, D29.1, D40.0                                                                                                                                                                                                                                                                                                                                                                                                                                                                                                                                                                                                                                    | 185-185.9, 222.2, 236.5                                                                                                                                                                                                                                                                                                                                                                                                                                                                                                                            |
| Testicular cancer                                  | C62-C62.9, D29.2-D29.8, D40.1-D40.8                                                                                                                                                                                                                                                                                                                                                                                                                                                                                                                                                                                                                               | 186-186.9, 222.0, 222.3, 236.4                                                                                                                                                                                                                                                                                                                                                                                                                                                                                                                     |
| Kidney cancer                                      | C64-C65.9, D30.0-D30.1, D41.0-D41.1                                                                                                                                                                                                                                                                                                                                                                                                                                                                                                                                                                                                                               | 189.0-189.1, 189.5-189.6, 223.0-223.1                                                                                                                                                                                                                                                                                                                                                                                                                                                                                                              |
| Bladder cancer                                     | C67-C67.9, D09.0, D30.3, D41.4-D41.8, D49.4                                                                                                                                                                                                                                                                                                                                                                                                                                                                                                                                                                                                                       | 188-188.9, 223.3, 233.7, 236.7, 239.4                                                                                                                                                                                                                                                                                                                                                                                                                                                                                                              |
| Brain and nervous system cancer                    | C70-C72.9                                                                                                                                                                                                                                                                                                                                                                                                                                                                                                                                                                                                                                                         | 191-192.9                                                                                                                                                                                                                                                                                                                                                                                                                                                                                                                                          |
| Thyroid cancer                                     | C73-C73.9, D09.3, D09.8, D34-D34.9, D44.0                                                                                                                                                                                                                                                                                                                                                                                                                                                                                                                                                                                                                         | 193-193.9, 226-226.9                                                                                                                                                                                                                                                                                                                                                                                                                                                                                                                               |
| Mesothelioma                                       | C45-C45.9                                                                                                                                                                                                                                                                                                                                                                                                                                                                                                                                                                                                                                                         |                                                                                                                                                                                                                                                                                                                                                                                                                                                                                                                                                    |
| Hodgkin lymphoma                                   | C81-C81.9                                                                                                                                                                                                                                                                                                                                                                                                                                                                                                                                                                                                                                                         | 201-201.9                                                                                                                                                                                                                                                                                                                                                                                                                                                                                                                                          |
| Non-Hodgkin lymphoma                               | C82-C86.6, C96-C96.9                                                                                                                                                                                                                                                                                                                                                                                                                                                                                                                                                                                                                                              | 200-200.9, 202-202.9                                                                                                                                                                                                                                                                                                                                                                                                                                                                                                                               |
| Multiple myeloma                                   | C88-C90.9                                                                                                                                                                                                                                                                                                                                                                                                                                                                                                                                                                                                                                                         | 203-203.9                                                                                                                                                                                                                                                                                                                                                                                                                                                                                                                                          |
| Leukemia                                           | C91-C95.9                                                                                                                                                                                                                                                                                                                                                                                                                                                                                                                                                                                                                                                         | 204-208.9                                                                                                                                                                                                                                                                                                                                                                                                                                                                                                                                          |
| Acute lymphoid leukemia                            | C91.0                                                                                                                                                                                                                                                                                                                                                                                                                                                                                                                                                                                                                                                             | 204.0                                                                                                                                                                                                                                                                                                                                                                                                                                                                                                                                              |
| Chronic lymphoid leukemia                          | C91.1                                                                                                                                                                                                                                                                                                                                                                                                                                                                                                                                                                                                                                                             | 204.1                                                                                                                                                                                                                                                                                                                                                                                                                                                                                                                                              |
| Acute myeloid leukemia                             | C92.0, C92.3-C92.6, C93.0, C94.0, C94.2, C94.4-C94.5                                                                                                                                                                                                                                                                                                                                                                                                                                                                                                                                                                                                              | 205.0, 205.3, 206.0, 207.0                                                                                                                                                                                                                                                                                                                                                                                                                                                                                                                         |
| Chronic myeloid leukemia                           | C92.1                                                                                                                                                                                                                                                                                                                                                                                                                                                                                                                                                                                                                                                             | 205.1, 206.1, 207.1                                                                                                                                                                                                                                                                                                                                                                                                                                                                                                                                |
| Other leukemia                                     | C91.2-C91.9, C92.2, C92.7-C92.9, C93.1-C93.9, C94.1, C94.3, C94.6-C95.9                                                                                                                                                                                                                                                                                                                                                                                                                                                                                                                                                                                           | 204.2-204.9, 205.2, 205.8-205.9, 206.2-207, 207.2-208.9                                                                                                                                                                                                                                                                                                                                                                                                                                                                                            |
| Other neoplasms                                    | C17-C17.9, C30-C31.9, C37-C38.8, C40-C41.9, C47-C44, C51-C52.9, C57-C57.8, C58-C58.0, C60-C60.9, C63-C63.8, C66-C66.9, C68.0-C68.8, C69-C69.9, C74-C75.8, D07.4, D09.2, D13.2-D13.3, D14.0, D15-D16.9, D28.0-D28.1, D28.7, D29.0, D30.2, D30.4-D30.8, D31-D33.9, D35-D36, D36.1-D36.7, D37.2, D38.2-D38.5, D39.2, D39.8, D41.2-D41.3, D42-D43.9, D44.1-D44.8, D45-D47.0, D47.2-D47.9, D48.0-D48.4, D49.6, K31.7, K62.0-K62.1, K63.5, N84.0-N84.1                                                                                                                                                                                                                  | 152-152.9, 158-158.9, 160-160.9, 163-164.9, 170-171.9, 181-181.9, 182.9, 183.2-183.8, 184.0-184.4, 184.8, 187.1-187.8, 189.2-189.4, 189.8, 190-190.9, 194-194.8, 209.0, 209.4, 211.2, 211.8, 212.0, 212.4-212.8, 213-213.9, 221.0-221.8, 222.1, 222.8, 223.2, 223.8, 224-225.9, 227-228.9, 229.0, 229.8, 230.7-230.8, 233.4-233.5, 234.0-234.8, 235.4, 235.8, 236.1, 237-237.3, 237.5-237.9, 238.0-238.1, 238.4-238.9, 239.2, 239.6, 569.0                                                                                                         |
| Cardiovascular diseases                            | B33.2, G45-G46.8, I01-I01.9, I02.0, I05-I09.9, I11-I11.9, I20-I25.9, I28-I28.8, I30-I31.1, I31.8-I41.9, I42.1-I42.8, I43-I43.9, I47-I48.9, I51.0-I51.4, I60-I63.9, I65-I66.9, I67.0-I67.3, I67.5-I67.6, I68.0-I68.2, I69.0-I69.3, I70.2-I70.8, I71-I73.9, I77-I83.9, I86-I89.0, I89.9, I98, K75.1                                                                                                                                                                                                                                                                                                                                                                 | 036.4, 074.2, 391-391.9, 392.0, 393-398.9, 402-402.9, 410-414.9, 417-417.9, 420-423, 423.1-424.9, 425.0-425.3, 425.5, 425.7-425.8, 427-427.3, 427.6-427.8, 429.0, 430-435.9, 437.0-437.2, 437.5-437.8, 440.2, 440.4, 441-443.9, 447-454.9, 456, 456.3-457, 457.1, 457.8-457.9, 459, 459.1-459.3                                                                                                                                                                                                                                                    |

| Appendix Table 4: List of International Classification of Diseases (ICD) codes mapped to the Global Burden of Disease cause list for causes of death |                                                                                                                                                                                                                    |                                                                                                                                                                                                                                            |
|------------------------------------------------------------------------------------------------------------------------------------------------------|--------------------------------------------------------------------------------------------------------------------------------------------------------------------------------------------------------------------|--------------------------------------------------------------------------------------------------------------------------------------------------------------------------------------------------------------------------------------------|
| Cause                                                                                                                                                | ICD10                                                                                                                                                                                                              | ICD9                                                                                                                                                                                                                                       |
| Rheumatic heart disease                                                                                                                              | I01-I01.9, I02.0, I05-I09.9                                                                                                                                                                                        | 391-391.9, 392.0, 393-398.9                                                                                                                                                                                                                |
| Ischemic heart disease                                                                                                                               | I20-I25.9                                                                                                                                                                                                          | 410-414.9                                                                                                                                                                                                                                  |
| Cerebrovascular disease                                                                                                                              | G45-G46.8, I60-I63.9, I65-I66.9, I67.0-I67.3, I67.5-I67.6, I68.1-I68.2, I69.0-I69.3                                                                                                                                | 430-435.9, 437.0-437.2, 437.5-437.8                                                                                                                                                                                                        |
| Ischemic stroke                                                                                                                                      | G45-G46.8, I63-I63.9, I65-I66.9, I67.2-I67.3, I67.5-I67.6, I69.3                                                                                                                                                   | 433-435.9, 437.0-437.1, 437.5-437.8                                                                                                                                                                                                        |
| Hemorrhagic stroke                                                                                                                                   | I60-I62.9, I67.0-I67.1, I68.1-I68.2, I69.0-I69.2                                                                                                                                                                   | 430-432.9, 437.2                                                                                                                                                                                                                           |
| Hypertensive heart disease                                                                                                                           | I11-I11.9                                                                                                                                                                                                          | 402-402.9                                                                                                                                                                                                                                  |
| Cardiomyopathy and myocarditis                                                                                                                       | B33.2, I40-I41.9, I42.1-I42.8, I43-I43.9, I51.4                                                                                                                                                                    | 422-422.9, 425.0-425.3, 425.5, 425.7-425.8, 429.0                                                                                                                                                                                          |
| Myocarditis                                                                                                                                          | B33.2, I40-I41.9, I51.4                                                                                                                                                                                            | 422-422.9                                                                                                                                                                                                                                  |
| Alcoholic cardiomyopathy                                                                                                                             | I42.6                                                                                                                                                                                                              | 425.5                                                                                                                                                                                                                                      |
| Other cardiomyopathy                                                                                                                                 | I42.1-I42.5, I42.7-I42.8, I43-I43.9                                                                                                                                                                                | 425.0-425.3, 425.7-425.8, 429.0                                                                                                                                                                                                            |
| Atrial fibrillation and flutter                                                                                                                      | I48-I48.9                                                                                                                                                                                                          | 427.3                                                                                                                                                                                                                                      |
| Aortic aneurysm                                                                                                                                      | I71-I71.9                                                                                                                                                                                                          | 441-441.9                                                                                                                                                                                                                                  |
| Peripheral artery disease                                                                                                                            | I70.2-I70.8, I73-I73.9                                                                                                                                                                                             | 440.2, 440.4, 443.0-443.9                                                                                                                                                                                                                  |
| Endocarditis                                                                                                                                         | I33-I33.9, I38-I39.9                                                                                                                                                                                               | 421-421.9, 424.9                                                                                                                                                                                                                           |
| Other cardiovascular and circulatory diseases                                                                                                        | I28-I28.8, I30-I31.1, I31.8-I32.8, I34-I37.9, I47-I47.9, I51.0-I51.3, I68.0, I72-I72.9, I77-I83.9, I86-I89.0, I89.9, I98, K75.1                                                                                    | 036.4, 074.2, 417-417.9, 420-420.9, 423, 423.1-424.8, 427-427.2, 427.6-427.8, 442-443, 447-454.9, 456, 456.3-457, 457.1, 457.8-457.9, 459, 459.1-459.3                                                                                     |
| Chronic respiratory diseases                                                                                                                         | D86-D86.2, D86.9, G47.3, J30-J35.9, J37-J47.9, J60-J63.8, J65-J68.9, J70-J70.1, J70.8-J70.9, J82, J84-J84.9, J91-J92.9                                                                                             | 135-135.9, 136.6, 327.2-327.8, 470, 470.9-474.9, 476-476.1, 477-479, 490-504.9, 506-506.9, 508-509, 515, 516-517.8, 518.6, 518.9, 519.1-519.4                                                                                              |
| Chronic obstructive pulmonary disease                                                                                                                | J40-J44.9, J47-J47.9                                                                                                                                                                                               | 490-492.9, 494-494.9, 496-499                                                                                                                                                                                                              |
| Pneumoconiosis                                                                                                                                       | J60-J63.8, J65-J65.0, J92.0                                                                                                                                                                                        | 500-504.9                                                                                                                                                                                                                                  |
| Silicosis                                                                                                                                            | J62-J62.9                                                                                                                                                                                                          | 502-502.9, 503.0, 503.9                                                                                                                                                                                                                    |
| Asbestosis                                                                                                                                           | J61-J61.0, J92.0                                                                                                                                                                                                   | 501                                                                                                                                                                                                                                        |
| Coal workers pneumoconiosis                                                                                                                          | J60-J60.0                                                                                                                                                                                                          | 500-500.9, 501.0-501.9                                                                                                                                                                                                                     |
| Other pneumoconiosis                                                                                                                                 | J63-J63.8, J65-J65.0                                                                                                                                                                                               | 503, 503.1, 504-504.9                                                                                                                                                                                                                      |
| Asthma                                                                                                                                               | J45-J46.9                                                                                                                                                                                                          | 493-493.9                                                                                                                                                                                                                                  |
| Interstitial lung disease and pulmonary sarcoidosis                                                                                                  | D86-D86.2, D86.9, J84-J84.9                                                                                                                                                                                        | 135-135.9, 136.6, 515, 516-516.9                                                                                                                                                                                                           |
| Other chronic respiratory diseases                                                                                                                   | G47.3, J30-J35.9, J37-J39.9, J66-J68.9, J70-J70.1, J70.8-J70.9, J82, J91-J92, J92.9                                                                                                                                | 327.2-327.8, 470, 470.9-474.9, 476-476.1, 477-479, 495-495.9, 506-506.9, 508-509, 517-517.8, 518.6, 518.9, 519.1-519.4                                                                                                                     |
| Cirrhosis and other chronic liver diseases                                                                                                           | B18-B18.9, I85-I85.9, I98.2, K70-K70.9, K71.3-K71.5, K71.7, K72.1-K74.6, K74.9, K75.2, K75.4-K76.2, K76.4-K76.9, K77.8                                                                                             | 456.0-456.2, 571-571.9, 572.2-573.9                                                                                                                                                                                                        |
| Cirrhosis and other chronic liver diseases due to hepatitis B                                                                                        |                                                                                                                                                                                                                    |                                                                                                                                                                                                                                            |
| Cirrhosis and other chronic liver diseases due to hepatitis C                                                                                        |                                                                                                                                                                                                                    |                                                                                                                                                                                                                                            |
| Cirrhosis and other chronic liver diseases due to alcohol use                                                                                        |                                                                                                                                                                                                                    |                                                                                                                                                                                                                                            |
| Cirrhosis and other chronic liver diseases due to other causes                                                                                       |                                                                                                                                                                                                                    |                                                                                                                                                                                                                                            |
| Digestive diseases                                                                                                                                   | I84-I84.9, K20-K29.9, K31-K31.6, K31.8, K35-K38.9, K40-K42.9, K44-K46.9, K50-K52.9, K55-K62, K62.2-K62.6, K62.8-K62.9, K64-K64.9, K66.8, K67, K68-K68.9, K77, K80-K83.9, K85-K86.9, K90-K90.9, K92.8, K93.8, M09.1 | 455-455.9, 530-536.1, 537-537.6, 537.8, 538, 540-543.9, 550-551.1, 551.3-552.1, 552.3-553.6, 555-558.9, 560-560.3, 560.8-560.9, 562-562.1, 564-564.1, 564.5-564.7, 565-566.9, 569.1-569.5, 569.7, 574-577.9, 579-579.2, 579.4-579.9, 787.1 |
| Peptic ulcer disease                                                                                                                                 | K25-K28.9, K31, K31.1-K31.6, K31.8                                                                                                                                                                                 | 531-534.9                                                                                                                                                                                                                                  |
| Gastritis and duodenitis                                                                                                                             | K29-K29.9                                                                                                                                                                                                          | 535-535.9                                                                                                                                                                                                                                  |
| Appendicitis                                                                                                                                         | K35-K37.9, K38.3-K38.9                                                                                                                                                                                             | 540-542.9                                                                                                                                                                                                                                  |
| Paralytic ileus and intestinal obstruction                                                                                                           | K56-K56.9                                                                                                                                                                                                          | 560-560.3, 560.8-560.9                                                                                                                                                                                                                     |
| Inguinal, femoral, and abdominal hernia                                                                                                              | K40-K42.9, K44-K46.9                                                                                                                                                                                               | 550-551.1, 551.3-552.1, 552.3-553.0, 553.6                                                                                                                                                                                                 |
| Inflammatory bowel disease                                                                                                                           | K50-K52.9, M09.1                                                                                                                                                                                                   | 555-556.9, 558-558.9, 569.5                                                                                                                                                                                                                |
| Vascular intestinal disorders                                                                                                                        | K55-K55.9                                                                                                                                                                                                          | 557-557.9                                                                                                                                                                                                                                  |
| Gallbladder and biliary diseases                                                                                                                     | K80-K83.9                                                                                                                                                                                                          | 574-576.9                                                                                                                                                                                                                                  |
| Pancreatitis                                                                                                                                         | K85-K86.9                                                                                                                                                                                                          | 577-577.9, 579.4                                                                                                                                                                                                                           |
| Other digestive diseases                                                                                                                             | I84-I84.9, K20-K24, K31.0, K38-K38.2, K57-K62, K62.2-K62.6, K62.8-K62.9, K64-K64.9, K66.8, K67, K68-K68.9, K77, K90-K90.9, K92.8, K93.8                                                                            | 455-455.9, 530-530.9, 536-536.1, 537-537.6, 537.8, 538, 543-543.9, 553.1-553.3, 562-562.1, 564-564.1, 564.5-564.7, 565-566.9, 569.1-569.4, 569.7, 579-579.2, 579.8-579.9, 787.1                                                            |
| Neurological disorders                                                                                                                               | F00-F03.9, G10-G13.8, G20-G21.0, G21.2-G24, G24.1-G25.0, G25.2-G25.3, G25.5, G25.8-G26.0, G30-G31.1, G31.8-G31.9, G35-G37.9, G40-G41.9, G61-G61.9, G70-G72, G72.2-G73.7, G90-G90.9, G95-G95.9, M33-M33.9           | 290-290.9, 294.1-294.9, 330-331.2, 331.5-337.9, 340-341.9, 345-345.9, 349, 349.2-349.8, 353.6-353.9, 356-356.9, 357.0-357.1, 357.3-357.4, 357.7, 358-359.9, 775.2                                                                          |
| Alzheimer disease and other dementias                                                                                                                | F00-F03.9, G30-G31.1, G31.8-G31.9                                                                                                                                                                                  | 290-290.9, 294.1-294.9, 331-331.2                                                                                                                                                                                                          |

**Appendix Table 4: List of International Classification of Diseases (ICD) codes mapped to the Global Burden of Disease cause list for causes of death**

| Cause                                               | ICD10                                                                                                                                                                                                                                                                                                                                                                                                                                                                                                                                                                                                                                                                                                                                                    | ICD9                                                                                                                                                                                                                                                                                                                                                                                                                                                                                                 |
|-----------------------------------------------------|----------------------------------------------------------------------------------------------------------------------------------------------------------------------------------------------------------------------------------------------------------------------------------------------------------------------------------------------------------------------------------------------------------------------------------------------------------------------------------------------------------------------------------------------------------------------------------------------------------------------------------------------------------------------------------------------------------------------------------------------------------|------------------------------------------------------------------------------------------------------------------------------------------------------------------------------------------------------------------------------------------------------------------------------------------------------------------------------------------------------------------------------------------------------------------------------------------------------------------------------------------------------|
| Parkinson disease                                   | G20-G21.0, G21.2-G22.0                                                                                                                                                                                                                                                                                                                                                                                                                                                                                                                                                                                                                                                                                                                                   | 332-332.9                                                                                                                                                                                                                                                                                                                                                                                                                                                                                            |
| Epilepsy                                            | G40-G41.9                                                                                                                                                                                                                                                                                                                                                                                                                                                                                                                                                                                                                                                                                                                                                | 345-345.9                                                                                                                                                                                                                                                                                                                                                                                                                                                                                            |
| Multiple sclerosis                                  | G35-G35.9                                                                                                                                                                                                                                                                                                                                                                                                                                                                                                                                                                                                                                                                                                                                                | 340-340.9                                                                                                                                                                                                                                                                                                                                                                                                                                                                                            |
| Motor neuron disease                                | G12.2-G12.9                                                                                                                                                                                                                                                                                                                                                                                                                                                                                                                                                                                                                                                                                                                                              | 335-335.2, 335.8-335.9                                                                                                                                                                                                                                                                                                                                                                                                                                                                               |
| Other neurological disorders                        | G10-G12.1, G13-G13.8, G23-G24, G24.1-G25.0, G25.2-G25.3, G25.5, G25.8-G26.0, G36-G37.9, G61-G61.9, G70-G72, G72.2-G73.7, G90-G90.9, G95-G95.9, M33-M33.9                                                                                                                                                                                                                                                                                                                                                                                                                                                                                                                                                                                                 | 330-330.9, 331.5-331.9, 333-334.9, 335.3, 336-337.9, 341-341.9, 349, 349.2-349.8, 353.6-353.9, 356-356.9, 357.0-357.1, 357.3-357.4, 357.7, 358-359.9, 775.2                                                                                                                                                                                                                                                                                                                                          |
| Mental and substance use disorders                  | F10-F16.9, F18-F19.9, F24, F50.0-F50.5, G31.2, G72.1, P04.3-P04.4, P96.1, Q86.0, R78.0-R78.5, X45-X45.9, X65-X65.9, Y15-Y15.9                                                                                                                                                                                                                                                                                                                                                                                                                                                                                                                                                                                                                            | 291-292.9, 303-303.9, 304.0-304.8, 305-305.9, 307.1, 357.5, 760.7, 790.3, E850-E854, E860                                                                                                                                                                                                                                                                                                                                                                                                            |
| Alcohol use disorders                               | F10-F10.9, G31.2, G72.1, P04.3, Q86.0, R78.0, X45-X45.9, X65-X65.9, Y15-Y15.9                                                                                                                                                                                                                                                                                                                                                                                                                                                                                                                                                                                                                                                                            | 291-291.9, 303-303.9, 305.0, 357.5, 790.3, E860                                                                                                                                                                                                                                                                                                                                                                                                                                                      |
| Drug use disorders                                  | F11-F16.9, F18-F19.9, P04.4, P96.1, R78.1-R78.5                                                                                                                                                                                                                                                                                                                                                                                                                                                                                                                                                                                                                                                                                                          | 292-292.9, 304.0-304.8, 305, 305.1-305.9, 760.7, E850-E854                                                                                                                                                                                                                                                                                                                                                                                                                                           |
| Opioid use disorders                                | F11-F11.9, P96.1, R78.1                                                                                                                                                                                                                                                                                                                                                                                                                                                                                                                                                                                                                                                                                                                                  | 304.0, 305.5                                                                                                                                                                                                                                                                                                                                                                                                                                                                                         |
| Cocaine use disorders                               | F14-F14.9, R78.2                                                                                                                                                                                                                                                                                                                                                                                                                                                                                                                                                                                                                                                                                                                                         | 304.2, 305.6                                                                                                                                                                                                                                                                                                                                                                                                                                                                                         |
| Amphetamine use disorders                           | F15-F15.9                                                                                                                                                                                                                                                                                                                                                                                                                                                                                                                                                                                                                                                                                                                                                | 304.4, 305.7                                                                                                                                                                                                                                                                                                                                                                                                                                                                                         |
| Other drug use disorders                            | F13-F13.9, F16-F16.9, F18-F19.9, R78.3-R78.5                                                                                                                                                                                                                                                                                                                                                                                                                                                                                                                                                                                                                                                                                                             | 292-292.9, 304.1, 304.5-304.8, 305, 305.1, 305.3-305.4, 305.8-305.9                                                                                                                                                                                                                                                                                                                                                                                                                                  |
| Eating disorders                                    | F50.0-F50.5                                                                                                                                                                                                                                                                                                                                                                                                                                                                                                                                                                                                                                                                                                                                              | 307.1                                                                                                                                                                                                                                                                                                                                                                                                                                                                                                |
| Anorexia nervosa                                    | F50.0-F50.1                                                                                                                                                                                                                                                                                                                                                                                                                                                                                                                                                                                                                                                                                                                                              | 307.1                                                                                                                                                                                                                                                                                                                                                                                                                                                                                                |
| Bulimia nervosa                                     | F50.2-F50.5                                                                                                                                                                                                                                                                                                                                                                                                                                                                                                                                                                                                                                                                                                                                              |                                                                                                                                                                                                                                                                                                                                                                                                                                                                                                      |
| Diabetes, urogenital, blood, and endocrine diseases | D25-D26, D26.1-D26.9, D28.2, D52.1, D55-D58.9, D59.0-D59.3, D59.5-D59.6, D60-D61.9, D63.1, D64.0, D64.4, D66-D67, D68.0-D69.8, D70-D75.8, D76-D78.8, D86.8, D89-D89.3, E03-E07.1, E09-E14.9, E15.0, E16.0-E16.9, E20-E34.8, E36-E36.8, E65-E68, E70-E85.2, E88-E89.9, G21.1, G24.0, G25.1, G25.4, G25.6-G25.7, G72.0, G93.7, G97-G97.9, I12-I13.9, I95.2-I95.3, I97-I97.9, I98.9, J70.2-J70.5, J95-J95.9, K43-K43.9, K62.7, K91-K91.9, K94-K95.8, M87.1, N00-N08.8, N10-N12.9, N14-N16.8, N18-N18.9, N20-N23.0, N25-N28.1, N29-N32.0, N32.3-N32.4, N34-N34.3, N36-N36.9, N39-N39.2, N41-N41.9, N44-N44.0, N45-N45.9, N49-N49.9, N65-N65.1, N72-N72.0, N75-N77.8, N80-N81.9, N83-N83.9, N99-N99.9, P70.0-P70.2, P96.2, P96.5, Q61-Q62.8, R50.2, R73-R73.9 | 218-219, 219.1-219.9, 236.0, 240-243.9, 244.0-244.1, 244.3-244.8, 245-246.9, 250-259.9, 270-273.9, 275-276, 277-277.2, 277.4-277.9, 278.0-278.8, 282-284.9, 286-286.5, 286.7-289.7, 357.2, 357.6, 403-404.9, 518.7, 519.0, 536.4, 539-539.9, 551.2, 552.2, 564.2-564.4, 569.6, 579.3, 580-583.9, 585-585.9, 588-590.9, 592-593.8, 594-599.6, 599.8, 601-602.9, 604-604.9, 608.2, 617-618.9, 620-620.9, 621.4-621.9, 622.3-622.7, 629-629.8, 753-753.3, 775.0-775.1, 775.3, 779.4-779.5, 788.0, 790.2 |
| Diabetes mellitus                                   | E10-E10.1, E10.3-E11.1, E11.3-E12.1, E12.3-E13.1, E13.3-E14.1, E14.3-E14.9, P70.0-P70.2, R73-R73.9                                                                                                                                                                                                                                                                                                                                                                                                                                                                                                                                                                                                                                                       | 250-250.3, 250.5-250.9, 357.2, 775.0-775.1, 790.2                                                                                                                                                                                                                                                                                                                                                                                                                                                    |
| Acute glomerulonephritis                            | N00-N01.9                                                                                                                                                                                                                                                                                                                                                                                                                                                                                                                                                                                                                                                                                                                                                | 580-580.9                                                                                                                                                                                                                                                                                                                                                                                                                                                                                            |
| Chronic kidney disease                              | D63.1, E10.2, E11.2, E12.2, E13.2, E14.2, I12-I13.9, N02-N08.8, N15.0, N18-N18.9, Q61-Q62.8                                                                                                                                                                                                                                                                                                                                                                                                                                                                                                                                                                                                                                                              | 250.4, 403-404.9, 581-583.9, 585-585.9, 589-589.9, 753-753.3                                                                                                                                                                                                                                                                                                                                                                                                                                         |
| Chronic kidney disease due to diabetes mellitus     | E10.2, E11.2, E12.2, E13.2, E14.2                                                                                                                                                                                                                                                                                                                                                                                                                                                                                                                                                                                                                                                                                                                        | 250.4                                                                                                                                                                                                                                                                                                                                                                                                                                                                                                |
| Chronic kidney disease due to hypertension          | I12-I13.9                                                                                                                                                                                                                                                                                                                                                                                                                                                                                                                                                                                                                                                                                                                                                | 403-404.9                                                                                                                                                                                                                                                                                                                                                                                                                                                                                            |
| Chronic kidney disease due to glomerulonephritis    | N03-N06.9                                                                                                                                                                                                                                                                                                                                                                                                                                                                                                                                                                                                                                                                                                                                                | 581-583.9                                                                                                                                                                                                                                                                                                                                                                                                                                                                                            |
| Chronic kidney disease due to other causes          | N02-N02.9, N07-N08.8, N15.0, Q61-Q62.8                                                                                                                                                                                                                                                                                                                                                                                                                                                                                                                                                                                                                                                                                                                   | 589-589.9, 753-753.3                                                                                                                                                                                                                                                                                                                                                                                                                                                                                 |
| Urinary diseases and male infertility               | N10-N12.9, N15, N15.1-N16.8, N20-N23.0, N25-N28.1, N29-N32.0, N32.3-N32.4, N34-N34.3, N36-N36.9, N39-N39.2, N41-N41.9, N44-N44.0, N45-N45.9, N49-N49.9                                                                                                                                                                                                                                                                                                                                                                                                                                                                                                                                                                                                   | 588-588.9, 590-590.9, 592-593.8, 594-598.1, 598.8-599.6, 599.8, 601-602.9, 604-604.9, 608.2, 788.0                                                                                                                                                                                                                                                                                                                                                                                                   |
| Interstitial nephritis and urinary tract infections | N10-N12.9, N15, N15.1-N16.8, N30-N30.9, N34-N34.3, N39.0-N39.2                                                                                                                                                                                                                                                                                                                                                                                                                                                                                                                                                                                                                                                                                           | 590-590.9, 595-595.9, 597-597.9, 599.0                                                                                                                                                                                                                                                                                                                                                                                                                                                               |
| Urolithiasis                                        | N20-N23.0                                                                                                                                                                                                                                                                                                                                                                                                                                                                                                                                                                                                                                                                                                                                                | 592-592.9, 594-594.9, 788.0                                                                                                                                                                                                                                                                                                                                                                                                                                                                          |
| Other urinary diseases                              | N25-N28.1, N29-N29.8, N31-N32.0, N32.3-N32.4, N36-N36.9, N39, N41-N41.9, N44-N44.0, N45-N45.9, N49-N49.9                                                                                                                                                                                                                                                                                                                                                                                                                                                                                                                                                                                                                                                 | 588-588.9, 593-593.8, 596-596.9, 598-598.1, 598.8-599, 599.1-599.6, 599.8, 601-602.9, 604-604.9, 608.2                                                                                                                                                                                                                                                                                                                                                                                               |
| Gynecological diseases                              | D25-D26, D26.1-D26.9, D28.2, E28.2, N72-N72.0, N75-N77.8, N80-N81.9, N83-N83.9                                                                                                                                                                                                                                                                                                                                                                                                                                                                                                                                                                                                                                                                           | 218-219, 219.1-219.9, 236.0, 256.4, 617-618.9, 620-620.9, 621.4-621.9, 622.3-622.7, 629-629.8                                                                                                                                                                                                                                                                                                                                                                                                        |
| Uterine fibroids                                    | D25-D26, D26.1-D26.9, D28.2                                                                                                                                                                                                                                                                                                                                                                                                                                                                                                                                                                                                                                                                                                                              | 218-219, 219.1-219.9, 236.0                                                                                                                                                                                                                                                                                                                                                                                                                                                                          |
| Polycystic ovarian syndrome                         | E28.2                                                                                                                                                                                                                                                                                                                                                                                                                                                                                                                                                                                                                                                                                                                                                    | 256.4                                                                                                                                                                                                                                                                                                                                                                                                                                                                                                |
| Endometriosis                                       | N80-N80.9                                                                                                                                                                                                                                                                                                                                                                                                                                                                                                                                                                                                                                                                                                                                                | 617-617.9                                                                                                                                                                                                                                                                                                                                                                                                                                                                                            |
| Genital prolapse                                    | N81-N81.9                                                                                                                                                                                                                                                                                                                                                                                                                                                                                                                                                                                                                                                                                                                                                | 618-618.9                                                                                                                                                                                                                                                                                                                                                                                                                                                                                            |
| Other gynecological diseases                        | N72-N72.0, N75-N77.8, N83-N83.9                                                                                                                                                                                                                                                                                                                                                                                                                                                                                                                                                                                                                                                                                                                          | 620-620.9, 621.4-621.9, 622.3-622.7, 629-629.8                                                                                                                                                                                                                                                                                                                                                                                                                                                       |
| Hemoglobinopathies and hemolytic anemias            | D55-D58.9, D59.1, D59.3, D59.5, D60-D61.9, D64.0, D64.4                                                                                                                                                                                                                                                                                                                                                                                                                                                                                                                                                                                                                                                                                                  | 282-284.9                                                                                                                                                                                                                                                                                                                                                                                                                                                                                            |
| Thalassemias                                        | D56-D56.9                                                                                                                                                                                                                                                                                                                                                                                                                                                                                                                                                                                                                                                                                                                                                | 282.4                                                                                                                                                                                                                                                                                                                                                                                                                                                                                                |
| Sickle cell disorders                               | D57-D57.2, D57.4-D57.8                                                                                                                                                                                                                                                                                                                                                                                                                                                                                                                                                                                                                                                                                                                                   | 282.6                                                                                                                                                                                                                                                                                                                                                                                                                                                                                                |
| G6PD deficiency                                     | D55-D55.2                                                                                                                                                                                                                                                                                                                                                                                                                                                                                                                                                                                                                                                                                                                                                | 282.2-282.3                                                                                                                                                                                                                                                                                                                                                                                                                                                                                          |
| Other hemoglobinopathies and hemolytic anemias      | D55.3-D55.9, D58-D58.9, D59.1, D59.3, D59.5, D60-D61.9, D64.0, D64.4                                                                                                                                                                                                                                                                                                                                                                                                                                                                                                                                                                                                                                                                                     | 282-282.1, 282.7-284.9                                                                                                                                                                                                                                                                                                                                                                                                                                                                               |

**Appendix Table 4: List of International Classification of Diseases (ICD) codes mapped to the Global Burden of Disease cause list for causes of death**

| Cause                                             | ICD10                                                                                                                                                                                                                                                                                                                                                                                                                              | ICD9                                                                                                                                                                                                                                                               |
|---------------------------------------------------|------------------------------------------------------------------------------------------------------------------------------------------------------------------------------------------------------------------------------------------------------------------------------------------------------------------------------------------------------------------------------------------------------------------------------------|--------------------------------------------------------------------------------------------------------------------------------------------------------------------------------------------------------------------------------------------------------------------|
| Endocrine, metabolic, blood, and immune disorders | D52.1, D59.0, D59.2, D59.6, D66-D67, D68.0-D69.8, D70-D75.8, D76-D78.8, D86.8, D89-D89.3, E03-E07.1, E09-E09.9, E15.0, E16.0-E16.9, E20-E28.1, E28.3-E34.8, E36-E36.8, E65-E68, E70-E85.2, E88-E89.9, G21.1, G24.0, G25.1, G25.4, G25.6-G25.7, G72.0, G93.7, G97-G97.9, I95.2-I95.3, I97-I97.9, I98.9, J70.2-J70.5, J95-J95.9, K43-K43.9, K62.7, K91-K91.9, K94-K95.8, M87.1, N14-N14.4, N65-N65.1, N99-N99.9, P96.2, P96.5, R50.2 | 240-243.9, 244.0-244.1, 244.3-244.8, 245-246.9, 251-256.3, 256.8-259.9, 270-273.9, 275-276, 277-277.2, 277.4-277.9, 278.0-278.8, 286-286.5, 286.7-289.7, 357.6, 518.7, 519.0, 536.4, 539-539.9, 551.2, 552.2, 564.2-564.4, 569.6, 579.3, 598.2, 775.3, 779.4-779.5 |
| Musculoskeletal disorders                         | I27.1, I67.7, L93-L93.2, M00-M03.0, M03.2-M03.6, M05-M09.0, M09.2-M09.8, M30-M32.9, M34-M36.8, M40-M43.1, M65-M65.0, M71.0-M71.1, M80-M82.8, M86.3-M86.4, M87-M87.0, M88-M89.0, M89.5, M89.7-M89.9                                                                                                                                                                                                                                 | 416.1, 437.4, 446-446.9, 695.4-695.5, 710-711.9, 714-714.3, 714.8-714.9, 730.1, 732-732.9, 733.0-733.1                                                                                                                                                             |
| Rheumatoid arthritis                              | M05-M06.9, M08.0-M08.8                                                                                                                                                                                                                                                                                                                                                                                                             | 714-714.3, 714.8-714.9                                                                                                                                                                                                                                             |
| Other musculoskeletal disorders                   | I27.1, I67.7, L93-L93.2, M00-M03.0, M03.2-M03.6, M07-M08, M08.9-M09.0, M09.2-M09.8, M30-M32.9, M34-M36.8, M40-M43.1, M65-M65.0, M71.0-M71.1, M80-M82.8, M86.3-M86.4, M87-M87.0, M88-M89.0, M89.5, M89.7-M89.9                                                                                                                                                                                                                      | 416.1, 437.4, 446-446.9, 695.4-695.5, 710-711.9, 730.1, 732-732.9, 733.0-733.1                                                                                                                                                                                     |
| Other non-communicable diseases                   | A46-A46.0, A66-A67.9, B86, D86.3, H05.0-H05.1, I89.1-I89.8, L00-L05.9, L08-L08.9, L10-L14.0, L51-L51.9, L88-L89.9, L97-L98.4, M72.5-M72.6, P96.0, Q00-Q07.9, Q10.4-Q18.9, Q20-Q28.9, Q30-Q36, Q37-Q45.9, Q50-Q60.6, Q63-Q86, Q86.1-Q87.8, Q89-Q89.8, Q90-Q93.9, Q95-Q99.8, R95-R95.9                                                                                                                                               | 035-035.9, 102-103.9, 133-133.6, 376.0-376.1, 457.2-457.3, 680-689, 694-695.3, 707-707.9, 740-749.0, 749.2-752.9, 753.4-758.9, 759.0-759.8, 798-798.0                                                                                                              |
| Congenital birth defects                          | P96.0, Q00-Q07.9, Q10.4-Q18.9, Q20-Q28.9, Q30-Q36, Q37-Q45.9, Q50-Q60.6, Q63-Q86, Q86.1-Q87.8, Q89-Q89.8, Q90-Q93.9, Q95-Q99.8                                                                                                                                                                                                                                                                                                     | 740-749.0, 749.2-752.9, 753.4-758.9, 759.0-759.8                                                                                                                                                                                                                   |
| Neural tube defects                               | Q00-Q01.9, Q05-Q05.9                                                                                                                                                                                                                                                                                                                                                                                                               | 740-741.9, 742.0                                                                                                                                                                                                                                                   |
| Congenital heart anomalies                        | Q20-Q28.9                                                                                                                                                                                                                                                                                                                                                                                                                          | 745-747.9                                                                                                                                                                                                                                                          |
| Orofacial clefts                                  | Q35-Q36, Q37-Q37.9                                                                                                                                                                                                                                                                                                                                                                                                                 | 749-749.0, 749.2-749.9                                                                                                                                                                                                                                             |
| Down syndrome                                     | Q90-Q90.9                                                                                                                                                                                                                                                                                                                                                                                                                          | 758.0                                                                                                                                                                                                                                                              |
| Other chromosomal abnormalities                   | Q87-Q87.8, Q91-Q93.9, Q95-Q95.9, Q97-Q97.9, Q99-Q99.8                                                                                                                                                                                                                                                                                                                                                                              | 758, 758.1-758.6, 758.8-758.9                                                                                                                                                                                                                                      |
| Congenital musculoskeletal and limb anomalies     | Q65-Q79, Q79.6-Q79.9                                                                                                                                                                                                                                                                                                                                                                                                               | 742.5, 754-756.5, 756.8-756.9                                                                                                                                                                                                                                      |
| Urogenital congenital anomalies                   | P96.0, Q50-Q56.4, Q60-Q60.6, Q63-Q64.9                                                                                                                                                                                                                                                                                                                                                                                             | 752-752.9, 753.4-753.9                                                                                                                                                                                                                                             |
| Digestive congenital anomalies                    | Q38-Q45.9, Q79.0-Q79.5                                                                                                                                                                                                                                                                                                                                                                                                             | 750-751.9, 756.6-756.7                                                                                                                                                                                                                                             |
| Other congenital birth defects                    | Q02-Q04.9, Q06-Q07.9, Q10.4-Q18.9, Q30-Q34.9, Q57, Q80-Q86, Q86.1-Q86.8, Q89-Q89.8                                                                                                                                                                                                                                                                                                                                                 | 742, 742.1-742.4, 742.8-744.9, 748-748.9, 757-757.9, 759.0-759.8                                                                                                                                                                                                   |
| Skin and subcutaneous diseases                    | A46-A46.0, A66-A67.9, B86, D86.3, I89.1-I89.8, L00-L05.9, L08-L08.9, L10-L14.0, L51-L51.9, L88-L89.9, L97-L98.4, M72.5-M72.6                                                                                                                                                                                                                                                                                                       | 035-035.9, 102-103.9, 133-133.6, 457.2-457.3, 680-689, 694-695.3, 707-707.9                                                                                                                                                                                        |
| Cellulitis                                        | L03-L03.9, M72.5-M72.6                                                                                                                                                                                                                                                                                                                                                                                                             | 681-682.9                                                                                                                                                                                                                                                          |
| Pyoderma                                          | A46-A46.0, A66-A67.9, I89.1-I89.8, L00-L02.9, L04-L05.9, L08-L08.9, L88, L97-L98.4                                                                                                                                                                                                                                                                                                                                                 | 035-035.9, 102-103.9, 457.2-457.3, 680-680.9, 683-689                                                                                                                                                                                                              |
| Decubitus ulcer                                   | L89-L89.9                                                                                                                                                                                                                                                                                                                                                                                                                          | 707-707.9                                                                                                                                                                                                                                                          |
| Other skin and subcutaneous diseases              | D86.3, L10-L14.0, L51-L51.9                                                                                                                                                                                                                                                                                                                                                                                                        | 694-695.3                                                                                                                                                                                                                                                          |
| Sudden infant death syndrome                      | R95-R95.9                                                                                                                                                                                                                                                                                                                                                                                                                          | 798-798.0                                                                                                                                                                                                                                                          |
| Injuries                                          | L55-L55.9, L56.3, L56.8-L56.9, L58-L58.9, U00-U03, V00-V86.9, V87.2-V87.3, V88.2-V88.3, V90-V98.8, W00-W46.2, W49-W62.9, W64-W70.9, W73-W75.9, W77-W81.9, W83-W94.9, W97.9, W99-X06.9, X08-X39.9, X46-X47, X47.1-X47.8, X48-X48.9, X50-X54.9, X57-X58.9, X60-X64.9, X66-Y08.9, Y35-Y84.9, Y87.0-Y87.1, Y88-Y88.3, Y89.0-Y89.1                                                                                                      | 349.0-349.1, 457.0, E800-E807, E830-E838, E840-E849, E856-E857, E861-E869, E870-E876, E878-E879, E880-E886, E888-E928, E930-E979, E990-E999                                                                                                                        |
| Transport injuries                                | V00-V86.9, V87.2-V87.3, V88.2-V88.3, V90-V98.8                                                                                                                                                                                                                                                                                                                                                                                     | E800-E807, E830-E838, E840-E849                                                                                                                                                                                                                                    |
| Road injuries                                     | V01-V04.9, V06-V80.9, V82-V82.9, V87.2-V87.3                                                                                                                                                                                                                                                                                                                                                                                       |                                                                                                                                                                                                                                                                    |
| Pedestrian road injuries                          | V01-V04.9, V06-V09.9                                                                                                                                                                                                                                                                                                                                                                                                               |                                                                                                                                                                                                                                                                    |
| Cyclist road injuries                             | V10-V19.9                                                                                                                                                                                                                                                                                                                                                                                                                          |                                                                                                                                                                                                                                                                    |
| Motorecyclist road injuries                       | V20-V29.9                                                                                                                                                                                                                                                                                                                                                                                                                          |                                                                                                                                                                                                                                                                    |
| Motor vehicle road injuries                       | V30-V79.9, V87.2-V87.3                                                                                                                                                                                                                                                                                                                                                                                                             |                                                                                                                                                                                                                                                                    |
| Other road injuries                               | V80-V80.9, V82-V82.9                                                                                                                                                                                                                                                                                                                                                                                                               |                                                                                                                                                                                                                                                                    |
| Other transport injuries                          | V00-V00.8, V05-V05.9, V81-V81.9, V83-V86.9, V88.2-V88.3, V90-V98.8                                                                                                                                                                                                                                                                                                                                                                 | E800-E807, E830-E838, E840-E849                                                                                                                                                                                                                                    |
| Unintentional injuries                            | L55-L55.9, L56.3, L56.8-L56.9, L58-L58.9, W00-W46.2, W49-W62.9, W64-W70.9, W73-W75.9, W77-W81.9, W83-W94.9, W97.9, W99-X06.9, X08-X32.9, X39-X39.9, X46-X47, X47.1-X47.8, X48-X48.9, X50-X54.9, X57-X58.9, Y40-Y84.9, Y88-Y88.3                                                                                                                                                                                                    | 349.0-349.1, 457.0, E856-E857, E861-E869, E870-E876, E878-E879, E880-E886, E888-E906, E910-E928, E930-E949                                                                                                                                                         |
| Falls                                             | W00-W19.9                                                                                                                                                                                                                                                                                                                                                                                                                          | E880-E886, E888                                                                                                                                                                                                                                                    |
| Drowning                                          | W65-W70.9, W73-W74.9                                                                                                                                                                                                                                                                                                                                                                                                               | E910                                                                                                                                                                                                                                                               |
| Fire, heat, and hot substances                    | X00-X06.9, X08-X19.9                                                                                                                                                                                                                                                                                                                                                                                                               | E890-E899, E924                                                                                                                                                                                                                                                    |
| Poisonings                                        | X46-X47, X47.1-X47.8, X48-X48.9                                                                                                                                                                                                                                                                                                                                                                                                    | E856-E857, E861-E869                                                                                                                                                                                                                                               |
| Exposure to mechanical forces                     | W20-W38.9, W40-W43.9, W45.0-W45.2, W46-W46.2, W49-W52, W75-W75.9                                                                                                                                                                                                                                                                                                                                                                   | E913, E916-E922                                                                                                                                                                                                                                                    |
| Unintentional firearm injuries                    | W32-W34.9                                                                                                                                                                                                                                                                                                                                                                                                                          | E922                                                                                                                                                                                                                                                               |
| Unintentional suffocation                         | W75-W75.9                                                                                                                                                                                                                                                                                                                                                                                                                          | E913                                                                                                                                                                                                                                                               |
| Other exposure to mechanical forces               | W20-W31.9, W35-W38.9, W40-W43.9, W45.0-W45.2, W46-W46.2, W49-W52                                                                                                                                                                                                                                                                                                                                                                   | E916-E921                                                                                                                                                                                                                                                          |

| Appendix Table 4: List of International Classification of Diseases (ICD) codes mapped to the Global Burden of Disease cause list for causes of death |                                                                                                                                                                                                                                                                                                                                                                                                                                                                                                                                                                                                                                                                                                                                                                                                                                                                                                                                                                                                                                                                                                                                                                                                                                                                                                                                                                                                                                                                                                                                                                                |                                                                                                                                                                                                                                                                                                                                                                                                                                                                                                                                                                                                                                                                                                                                                                                                                                                                                                                                                                                                                                                                                                                                                                         |
|------------------------------------------------------------------------------------------------------------------------------------------------------|--------------------------------------------------------------------------------------------------------------------------------------------------------------------------------------------------------------------------------------------------------------------------------------------------------------------------------------------------------------------------------------------------------------------------------------------------------------------------------------------------------------------------------------------------------------------------------------------------------------------------------------------------------------------------------------------------------------------------------------------------------------------------------------------------------------------------------------------------------------------------------------------------------------------------------------------------------------------------------------------------------------------------------------------------------------------------------------------------------------------------------------------------------------------------------------------------------------------------------------------------------------------------------------------------------------------------------------------------------------------------------------------------------------------------------------------------------------------------------------------------------------------------------------------------------------------------------|-------------------------------------------------------------------------------------------------------------------------------------------------------------------------------------------------------------------------------------------------------------------------------------------------------------------------------------------------------------------------------------------------------------------------------------------------------------------------------------------------------------------------------------------------------------------------------------------------------------------------------------------------------------------------------------------------------------------------------------------------------------------------------------------------------------------------------------------------------------------------------------------------------------------------------------------------------------------------------------------------------------------------------------------------------------------------------------------------------------------------------------------------------------------------|
| Cause                                                                                                                                                | ICD10                                                                                                                                                                                                                                                                                                                                                                                                                                                                                                                                                                                                                                                                                                                                                                                                                                                                                                                                                                                                                                                                                                                                                                                                                                                                                                                                                                                                                                                                                                                                                                          | ICD9                                                                                                                                                                                                                                                                                                                                                                                                                                                                                                                                                                                                                                                                                                                                                                                                                                                                                                                                                                                                                                                                                                                                                                    |
| Adverse effects of medical treatment                                                                                                                 | Y40-Y84.9, Y88-Y88.3                                                                                                                                                                                                                                                                                                                                                                                                                                                                                                                                                                                                                                                                                                                                                                                                                                                                                                                                                                                                                                                                                                                                                                                                                                                                                                                                                                                                                                                                                                                                                           | 349.0-349.1, 457.0, E870-E876, E878-E879, E930-E949                                                                                                                                                                                                                                                                                                                                                                                                                                                                                                                                                                                                                                                                                                                                                                                                                                                                                                                                                                                                                                                                                                                     |
| Animal contact                                                                                                                                       | W52.0-W62.9, W64-W64.9, X20-X29.9                                                                                                                                                                                                                                                                                                                                                                                                                                                                                                                                                                                                                                                                                                                                                                                                                                                                                                                                                                                                                                                                                                                                                                                                                                                                                                                                                                                                                                                                                                                                              | E905-E906                                                                                                                                                                                                                                                                                                                                                                                                                                                                                                                                                                                                                                                                                                                                                                                                                                                                                                                                                                                                                                                                                                                                                               |
| Venomous animal contact                                                                                                                              | X20-X29.9                                                                                                                                                                                                                                                                                                                                                                                                                                                                                                                                                                                                                                                                                                                                                                                                                                                                                                                                                                                                                                                                                                                                                                                                                                                                                                                                                                                                                                                                                                                                                                      | E905                                                                                                                                                                                                                                                                                                                                                                                                                                                                                                                                                                                                                                                                                                                                                                                                                                                                                                                                                                                                                                                                                                                                                                    |
| Non-venomous animal contact                                                                                                                          | W52.0-W62.9, W64-W64.9                                                                                                                                                                                                                                                                                                                                                                                                                                                                                                                                                                                                                                                                                                                                                                                                                                                                                                                                                                                                                                                                                                                                                                                                                                                                                                                                                                                                                                                                                                                                                         | E906                                                                                                                                                                                                                                                                                                                                                                                                                                                                                                                                                                                                                                                                                                                                                                                                                                                                                                                                                                                                                                                                                                                                                                    |
| Foreign body                                                                                                                                         | W44-W45, W45.3-W45.9, W78-W80.9, W83-W84.9                                                                                                                                                                                                                                                                                                                                                                                                                                                                                                                                                                                                                                                                                                                                                                                                                                                                                                                                                                                                                                                                                                                                                                                                                                                                                                                                                                                                                                                                                                                                     | E911-E912, E914-E915                                                                                                                                                                                                                                                                                                                                                                                                                                                                                                                                                                                                                                                                                                                                                                                                                                                                                                                                                                                                                                                                                                                                                    |
| Pulmonary aspiration and foreign body in airway                                                                                                      | W78-W80.9, W83-W84.9                                                                                                                                                                                                                                                                                                                                                                                                                                                                                                                                                                                                                                                                                                                                                                                                                                                                                                                                                                                                                                                                                                                                                                                                                                                                                                                                                                                                                                                                                                                                                           | E911-E912                                                                                                                                                                                                                                                                                                                                                                                                                                                                                                                                                                                                                                                                                                                                                                                                                                                                                                                                                                                                                                                                                                                                                               |
| Foreign body in other body part                                                                                                                      | W44-W45, W45.3-W45.9                                                                                                                                                                                                                                                                                                                                                                                                                                                                                                                                                                                                                                                                                                                                                                                                                                                                                                                                                                                                                                                                                                                                                                                                                                                                                                                                                                                                                                                                                                                                                           | E914-E915                                                                                                                                                                                                                                                                                                                                                                                                                                                                                                                                                                                                                                                                                                                                                                                                                                                                                                                                                                                                                                                                                                                                                               |
| Environmental heat and cold exposure                                                                                                                 | L55-L55.9, L56.3, L56.8-L56.9, L58-L58.9, W88-W94.9, W97.9, W99-W99.9, X30-X32.9, X39-X39.9                                                                                                                                                                                                                                                                                                                                                                                                                                                                                                                                                                                                                                                                                                                                                                                                                                                                                                                                                                                                                                                                                                                                                                                                                                                                                                                                                                                                                                                                                    | E900-E902, E926                                                                                                                                                                                                                                                                                                                                                                                                                                                                                                                                                                                                                                                                                                                                                                                                                                                                                                                                                                                                                                                                                                                                                         |
| Other unintentional injuries                                                                                                                         | W39-W39.9, W77-W77.9, W81-W81.9, W85-W87.9, X50-X54.9, X57-X58.9                                                                                                                                                                                                                                                                                                                                                                                                                                                                                                                                                                                                                                                                                                                                                                                                                                                                                                                                                                                                                                                                                                                                                                                                                                                                                                                                                                                                                                                                                                               | E903-E904, E923, E925, E927-E928                                                                                                                                                                                                                                                                                                                                                                                                                                                                                                                                                                                                                                                                                                                                                                                                                                                                                                                                                                                                                                                                                                                                        |
| Self-harm and interpersonal violence                                                                                                                 | X60-X64.9, X66-Y08.9, Y87.0-Y87.1                                                                                                                                                                                                                                                                                                                                                                                                                                                                                                                                                                                                                                                                                                                                                                                                                                                                                                                                                                                                                                                                                                                                                                                                                                                                                                                                                                                                                                                                                                                                              | E950-E969                                                                                                                                                                                                                                                                                                                                                                                                                                                                                                                                                                                                                                                                                                                                                                                                                                                                                                                                                                                                                                                                                                                                                               |
| Self-harm                                                                                                                                            | X60-X64.9, X66-X84.9, Y87.0                                                                                                                                                                                                                                                                                                                                                                                                                                                                                                                                                                                                                                                                                                                                                                                                                                                                                                                                                                                                                                                                                                                                                                                                                                                                                                                                                                                                                                                                                                                                                    | E950-E959                                                                                                                                                                                                                                                                                                                                                                                                                                                                                                                                                                                                                                                                                                                                                                                                                                                                                                                                                                                                                                                                                                                                                               |
| Self-harm by firearm                                                                                                                                 | X72-X74.9                                                                                                                                                                                                                                                                                                                                                                                                                                                                                                                                                                                                                                                                                                                                                                                                                                                                                                                                                                                                                                                                                                                                                                                                                                                                                                                                                                                                                                                                                                                                                                      | E955                                                                                                                                                                                                                                                                                                                                                                                                                                                                                                                                                                                                                                                                                                                                                                                                                                                                                                                                                                                                                                                                                                                                                                    |
| Self-harm by other specified means                                                                                                                   | X60-X64.9, X66-X71.9, X75-X84.9, Y87.0                                                                                                                                                                                                                                                                                                                                                                                                                                                                                                                                                                                                                                                                                                                                                                                                                                                                                                                                                                                                                                                                                                                                                                                                                                                                                                                                                                                                                                                                                                                                         | E950-E954, E956-E959                                                                                                                                                                                                                                                                                                                                                                                                                                                                                                                                                                                                                                                                                                                                                                                                                                                                                                                                                                                                                                                                                                                                                    |
| Interpersonal violence                                                                                                                               | X85-Y08.9, Y87.1                                                                                                                                                                                                                                                                                                                                                                                                                                                                                                                                                                                                                                                                                                                                                                                                                                                                                                                                                                                                                                                                                                                                                                                                                                                                                                                                                                                                                                                                                                                                                               | E960-E969                                                                                                                                                                                                                                                                                                                                                                                                                                                                                                                                                                                                                                                                                                                                                                                                                                                                                                                                                                                                                                                                                                                                                               |
| Physical violence by firearm                                                                                                                         | X93-X95.9                                                                                                                                                                                                                                                                                                                                                                                                                                                                                                                                                                                                                                                                                                                                                                                                                                                                                                                                                                                                                                                                                                                                                                                                                                                                                                                                                                                                                                                                                                                                                                      | E965                                                                                                                                                                                                                                                                                                                                                                                                                                                                                                                                                                                                                                                                                                                                                                                                                                                                                                                                                                                                                                                                                                                                                                    |
| Physical violence by sharp object                                                                                                                    | X99-X99.9                                                                                                                                                                                                                                                                                                                                                                                                                                                                                                                                                                                                                                                                                                                                                                                                                                                                                                                                                                                                                                                                                                                                                                                                                                                                                                                                                                                                                                                                                                                                                                      | E966                                                                                                                                                                                                                                                                                                                                                                                                                                                                                                                                                                                                                                                                                                                                                                                                                                                                                                                                                                                                                                                                                                                                                                    |
| Physical violence by other means                                                                                                                     | X85-X92.9, X96-X98.9, Y00-Y04.9, Y06-Y08.9, Y87.1                                                                                                                                                                                                                                                                                                                                                                                                                                                                                                                                                                                                                                                                                                                                                                                                                                                                                                                                                                                                                                                                                                                                                                                                                                                                                                                                                                                                                                                                                                                              | E961-E964, E967-E969                                                                                                                                                                                                                                                                                                                                                                                                                                                                                                                                                                                                                                                                                                                                                                                                                                                                                                                                                                                                                                                                                                                                                    |
| Forces of nature, conflict and terrorism, and executions and police conflict                                                                         | U00-U03, X33-X38.9, Y35-Y38.9, Y89.0-Y89.1                                                                                                                                                                                                                                                                                                                                                                                                                                                                                                                                                                                                                                                                                                                                                                                                                                                                                                                                                                                                                                                                                                                                                                                                                                                                                                                                                                                                                                                                                                                                     | E907-E909, E970-E979, E990-E999                                                                                                                                                                                                                                                                                                                                                                                                                                                                                                                                                                                                                                                                                                                                                                                                                                                                                                                                                                                                                                                                                                                                         |
| Exposure to forces of nature                                                                                                                         | X33-X38.9                                                                                                                                                                                                                                                                                                                                                                                                                                                                                                                                                                                                                                                                                                                                                                                                                                                                                                                                                                                                                                                                                                                                                                                                                                                                                                                                                                                                                                                                                                                                                                      | E907-E909                                                                                                                                                                                                                                                                                                                                                                                                                                                                                                                                                                                                                                                                                                                                                                                                                                                                                                                                                                                                                                                                                                                                                               |
| Conflict and terrorism                                                                                                                               | U00-U03, Y36-Y38.9, Y89.1                                                                                                                                                                                                                                                                                                                                                                                                                                                                                                                                                                                                                                                                                                                                                                                                                                                                                                                                                                                                                                                                                                                                                                                                                                                                                                                                                                                                                                                                                                                                                      | E979, E990-E999                                                                                                                                                                                                                                                                                                                                                                                                                                                                                                                                                                                                                                                                                                                                                                                                                                                                                                                                                                                                                                                                                                                                                         |
| Executions and police conflict                                                                                                                       | Y35-Y35.9, Y89.0                                                                                                                                                                                                                                                                                                                                                                                                                                                                                                                                                                                                                                                                                                                                                                                                                                                                                                                                                                                                                                                                                                                                                                                                                                                                                                                                                                                                                                                                                                                                                               | E970-E978                                                                                                                                                                                                                                                                                                                                                                                                                                                                                                                                                                                                                                                                                                                                                                                                                                                                                                                                                                                                                                                                                                                                                               |
| Still Born                                                                                                                                           | P95-P95.9                                                                                                                                                                                                                                                                                                                                                                                                                                                                                                                                                                                                                                                                                                                                                                                                                                                                                                                                                                                                                                                                                                                                                                                                                                                                                                                                                                                                                                                                                                                                                                      | 768.0-768.1                                                                                                                                                                                                                                                                                                                                                                                                                                                                                                                                                                                                                                                                                                                                                                                                                                                                                                                                                                                                                                                                                                                                                             |
| Garbage Code (GBD Level 1)                                                                                                                           | A40-A41.9, A48.0, A48.3, A49.0, A59-A59.9, A71-A71.9, A74.0, B07-B07.9, B30-B30.9, B35-B36.9, B85-B85.4, B87-B88.9, B94.0, D50-D50.0, D50.9, D62-D63.0, D63.8-D64, D64.1-D64.2, D64.8-D65.9, D68, D69.9, E15, E16, E50-E50.9, E64.1, E85.3-E87.6, E87.8-E87.9, F06.2-F06.4, F07.2, F09-F09.9, F17-F17.9, F20-F23.9, F25-F49, F51-F99.0, G06-G08.0, G32-G32.8, G43-G44.2, G44.4-G44.8, G47-G47.2, G47.4-G47.9, G50-G60.9, G62-G65.2, G80-G83.9, G89-G89.4, G91-G91.2, G91.4-G92.9, G93.1-G93.2, G93.4-G93.6, G99-H05, H05.2-H09.9, H71-H99, I26-I26.9, I31.2-I31.4, I46-I46.9, I50-I50.9, I51.7, I67.4, I76, I95-I95.1, I95.8-I95.9, J69-J69.9, J80-J80.9, J85-J85.3, J86-J86.9, J93-J93.1, J93.8-J93.9, J94.2, J96-J96.9, J98.1-J98.3, K00-K19, K30, K65-K66.1, K66.9, K71-K71.1, K71.8-K72.0, K75.0, L20-L30.9, L40-L50.9, L52-L54.0, L56-L56.2, L56.4-L56.5, L57-L57.9, L59-L68.9, L70-L76.8, L80-L87.9, L90-L92.9, L94-L96, L98.5-L99.8, M04, M10-M12.0, M12.2-M29, M37-M39, M43.2-M49, M49.2-M64, M65.1-M71, M71.2-M72.4, M72.8-M73, M73.8-M79.9, M83-M86.2, M86.5-M86.9, M87.2-M87.9, M89.1-M89.4, M90-M99.9, N17-N17.9, N19-N19.9, N32.1-N32.2, N32.8-N33.8, N35-N35.9, N37-N37.8, N39.3-N39.8, N42-N43.4, N44.1-N44.8, N46-N48.9, N50-N53.9, N61-N64.9, N82-N82.9, N91-N91.5, N95, N95.1-N95.9, N97-N97.9, R02-R02.9, R03.1, R07.0, R08-R09, R09.3, R11-R12.0, R14-R15.9, R19-R19.6, R19.8-R23, R23.1-R30.9, R32-R50.1, R50.8-R57.9, R58.0-R72.9, R74-R78, R78.6-R94.8, R96-R99.9, U05, U07-U81, U90-U99, X40-X44.9, X47.0, X47.9, X49-X49.9, Y10-Y19.9, Z00-Z15.8, Z17 | 038-038.9, 040.0, 041.1, 076-078.2, 110-111.9, 125-125.3, 126-126.9, 127.2-127.9, 131-132.9, 133.8-134.9, 139.1, 139.9, 176-176.9, 247-248, 264-264.9, 274-274.9, 276.0-276.5, 276.7-276.9, 277.3, 280-280.0, 280.9-281, 285-285.9, 286.6, 293, 294-294.0, 295-302.9, 306-307.0, 307.2-307.4, 307.6-319.9, 324-327.1, 328-329, 338-339.1, 339.3-339.8, 342-344.9, 346-347.9, 350-353.5, 354-355.9, 360-376, 376.2-380.9, 384-389.9, 415-415.9, 423.0, 427.5, 427.9-428.9, 429.3, 437.3, 458-458.9, 459.0, 507-507.9, 510-510.9, 512-513.9, 518.0-518.2, 518.5, 520-529.9, 536.3, 536.8-536.9, 537.7, 537.9, 564.8-564.9, 567-568.9, 570-570.9, 572-572.1, 584-584.9, 586-587.9, 600-600.9, 603-603.9, 605-608.1, 608.3-609, 611-612.1, 615-616.9, 619-619.9, 621-621.3, 622-622.2, 622.8-623.6, 623.8-624.5, 624.8-628.9, 629.9, 690-693.9, 695.8-706.9, 708-709.9, 712-713.8, 715-716, 716.2-721.6, 721.8-730.0, 730.2-730.3, 730.7-731.9, 733, 733.2-734.2, 737-738, 738.2-739.9, 780-782.3, 782.6-784.6, 784.9, 785.4-786, 786.6, 786.8, 787, 787.3-788, 788.1-789, 790-790.1, 790.4-796.1, 796.3-797.9, 798.1-799, 799.2-799.9, E855, E858, E980-E982, V01-V08, V10 |
| Garbage Code (GBD Level 2)                                                                                                                           | A14.9, A29, A45-A45.9, A47-A48, A48.8-A49, A49.3-A49.9, A61-A62, A72-A73, A76, A97, B08-B09, B11-B14, B28-B29, B31-B32.4, B34-B34.9, B61-B62, B68-B68.9, B73-B74.2, B76-B76.9, B78-B81.8, B84, B93-B94, B94.8-B94.9, B95.6-B97.3, B97.7-B99.9, D59, D59.4, D59.8-D59.9, G44.3, G91.3, G93.0, G93.3, I10-I10.9, I15-I15.9, I27-I27.0, I27.2-I27.9, I28.9, I70-I70.1, I70.9, I74-I75.8, J81-J81.1, J90-J90.0, J94-J94.1, J94.8-J94.9, K92.0-K92.2, N70-N71.9, N73-N74.0, N74.3-N74.8, R03-R03.0, R04-R06.9, R09.0-R09.2, R09.8-R10.9, R13-R13.9, R16-R18.9, R23.0, R58, S00, W47-W48, W63, W71-W72, W76-W76.9, W82, W95-W97, W98, X07, X55-X56, X59-X59.9, Y20-Y34.9, Y86-Y87, Y87.2, Y89, Y89.9-Y99.9                                                                                                                                                                                                                                                                                                                                                                                                                                                                                                                                                                                                                                                                                                                                                                                                                                                                           | 000-000.9, 041.2-041.9, 067-069, 078.8-078.9, 079.8-079.9, 089-089.9, 105-109.9, 119, 136.8-136.9, 139.8, 279-279.9, 304, 304.9, 307.5, 339.2, 401-401.9, 405-405.9, 416-416.0, 416.2-416.9, 440-440.1, 440.3, 440.8-440.9, 444-445.8, 511-511.9, 514-514.9, 515.0-515.9, 518, 518.3-518.4, 518.8, 536.2, 578-578.9, 599.7, 613-614.9, 714.4, 716.1, 721.7, 735-736.9, 738.0-738.1, 782.4, 784.7-784.8, 786.3, 787.0, 787.2, 789.0-789.9, 796.2, 799.0-799.1, 800-E80, E83, E839, E85, E859, E87, E877, E88, E887, E929, E983-E985, E988-E989                                                                                                                                                                                                                                                                                                                                                                                                                                                                                                                                                                                                                           |

**Appendix Table 4: List of International Classification of Diseases (ICD) codes mapped to the Global Burden of Disease cause list for causes of death**

| Cause                             | ICD10                                                                                                                                                                                                                                                                                                                                                                                                                                                                                                                                                                                                                                                                                                                                                                                                                                                                                                                                                                                                                                                                                                                                                                                                                                                                                                                                                                                                                                                                                                                                                                                                                                                                                  | ICD9                                                                                                                                                                                                                                                                                                                                                                                                                                                                                                                                                                                                                                                                                                                                                                                                                                                                                                                                                                                            |
|-----------------------------------|----------------------------------------------------------------------------------------------------------------------------------------------------------------------------------------------------------------------------------------------------------------------------------------------------------------------------------------------------------------------------------------------------------------------------------------------------------------------------------------------------------------------------------------------------------------------------------------------------------------------------------------------------------------------------------------------------------------------------------------------------------------------------------------------------------------------------------------------------------------------------------------------------------------------------------------------------------------------------------------------------------------------------------------------------------------------------------------------------------------------------------------------------------------------------------------------------------------------------------------------------------------------------------------------------------------------------------------------------------------------------------------------------------------------------------------------------------------------------------------------------------------------------------------------------------------------------------------------------------------------------------------------------------------------------------------|-------------------------------------------------------------------------------------------------------------------------------------------------------------------------------------------------------------------------------------------------------------------------------------------------------------------------------------------------------------------------------------------------------------------------------------------------------------------------------------------------------------------------------------------------------------------------------------------------------------------------------------------------------------------------------------------------------------------------------------------------------------------------------------------------------------------------------------------------------------------------------------------------------------------------------------------------------------------------------------------------|
| <p>Garbage Code (GBD Level 3)</p> | <p>A01, A31-A31.9, A42-A44.9, A49.2, A64-A64.0, A99-A99.0, B37-B46.9, B49-B49.9, B55.1-B55.2, B58-B59.9, B89, C14-C14.9, C26-C29, C35-C36, C39-C39.9, C42, C46-C46.9, C55-C55.9, C57.9, C59, C63.9, C68, C68.9, C75.9-C80.9, C87, C97-D00.0, D01, D01.4-D02, D02.4-D02.9, D07, D07.3, D07.6-D09, D09.1, D09.7, D09.9-D10, D10.9, D13, D13.9-D14, D14.4, D17-D21.9, D28, D28.9-D29, D29.9-D30, D30.9, D36.0, D36.9-D37.0, D37.6-D38, D38.6-D39.0, D39.7, D39.9-D40, D40.9-D41, D41.9, D44, D44.9, D48, D48.7-D49.1, D49.5, D49.7-D49.9, D54, D75.9, D79-D85, D87-D88, D89.8-D99, E07.8-E08.9, E17-E19, E34.9-E35.8, E37-E39, E47-E49, E62, E69, E87.7, E90-E99.8, F04-F06.1, F06.5-F07.0, F07.8-F08, F50, F50.8-F50.9, G09-G09.9, G15-G19, G27-G29, G33-G34, G38-G39, G42, G48-G49, G66-G69, G74-G79, G84-G88, G93, G93.8-G94.8, G96-G96.9, G98-G98.9, I00.0, I03-I04, I14, I16-I19, I29-I29.9, I44-I45.9, I49-I49.9, I51, I51.6, I51.8-I59, I90-I94, I96-I96.9, I98.4-I98.8, I99-J00.0, J02, J02.8-J03, J03.8-J04, J04.1-J04.3, J05.1-J06.9, J48-I59, J71-J79, J81.9, J83, J85.9, J87-J89, J90.9, J93.6, J97-J98.0, J98.4-J99.8, K31.9-K34, K39, K47-K49, K53-K54, K63-K63.4, K63.8-K63.9, K69, K75, K78-K79, K84, K87-K89, K92, K92.9-K93, K96-K99, L06-L07, L09, L15-L19, L31-L39, L69, L77-L79, N09, N13-N13.9, N24, N28.8-N28.9, N38, N39.9-N40.9, N54-N59, N66-N69, N78-N79, N84, N84.2-N86, N88-N90.9, N92-N94.9, N95.0, O08-O08.9, O17-O19, O27, O37-O39, O49-O59, O78-O79, O93-O95.9, P06, P16-P18, P30-P34.2, P40-P49, P62-P69, P73, P79, P82, P85-P89, P96.9-P99.9, Q08-Q10.3, Q19, Q29, Q36.0-Q36.9, Q46-Q49, Q88, Q89.9, Q94, Q99.9-R01.2, R07, R07.1-R07.9, R31-R31.9</p> | <p>002, 031-031.9, 039-039.9, 085, 085.1-085.9, 088.0-088.7, 112-118.9, 130-130.9, 136.3-136.5, 149-149.9, 159-159.9, 165-169, 177-179.9, 183.9-184, 184.5, 184.9, 187, 187.9, 189, 189.9, 194.9-199.9, 209, 209.2-209.3, 209.6-210, 211, 211.9-212, 212.9, 214-216.9, 221, 221.9-222, 222.9-223, 223.9, 229, 229.1, 229.9-230.0, 230.9-231, 231.8-231.9, 233, 233.3, 233.6, 233.9-234, 234.9-235, 235.1-235.3, 235.5, 235.9-236, 236.3, 236.6, 236.9, 237.4, 239-239.1, 239.5, 239.7-239.9, 249-249.9, 276.6, 278, 293.0-293.9, 331.3-331.4, 348-348.9, 349.9, 357, 357.8-357.9, 399-400.0, 406-409.4, 418-419.9, 426-426.9, 427.4, 429, 429.2, 429.4-429.9, 459.5-460.9, 462-464, 464.1, 464.3, 464.5, 465-465.9, 505-505.9, 519, 519.8-519.9, 544-549, 553.8-553.9, 559-559.0, 560.4-560.7, 561, 562.2-563, 569, 569.8-569.9, 591-591.9, 593.9, 599.9, 623.7, 624.6, 637-637.9, 639-639.9, 749.1, 759, 759.9, 779.9, 782.5, 785-785.3, 786.0-786.2, 786.4-786.5, 786.7, 786.9, E986-E987</p> |
| <p>Garbage Code (GBD Level 4)</p> | <p>B54-B55, B55.9, B64, B82-B82.9, B83.9, D47.1, G00, G00.9-G02.8, G03.9, I42-I42.0, I42.9, I51.5, I64-I64.9, I67, I67.8-I68, I68.8-I69, I69.4-I69.9, J07-J08, J15.9, J17-J19.6, J22-J29, J64-J64.9, P23, P23.5-P23.9, P37.3-P37.4, V87-V87.1, V87.4-V88.1, V88.4-V89.9, V99-V99.0, Y09-Y09.9, Y85-Y85.9</p>                                                                                                                                                                                                                                                                                                                                                                                                                                                                                                                                                                                                                                                                                                                                                                                                                                                                                                                                                                                                                                                                                                                                                                                                                                                                                                                                                                           | <p>084, 084.6, 238, 244, 244.9, 289.8-289.9, 320, 320.9, 425, 425.4, 425.9, 429.1, 436-437, 437.9-439.6, 482.9-483, 484, 484.8-486.9, 770.0, E808-E829</p>                                                                                                                                                                                                                                                                                                                                                                                                                                                                                                                                                                                                                                                                                                                                                                                                                                      |

**Appendix Table 5: GBD 2016 cause and sequela hierarchy**

|                                                                                                    |
|----------------------------------------------------------------------------------------------------|
| <b>Causes and sequelae</b>                                                                         |
| All causes                                                                                         |
| Communicable, maternal, neonatal, and nutritional diseases                                         |
| HIV/AIDS and tuberculosis                                                                          |
| Tuberculosis                                                                                       |
| Drug-susceptible tuberculosis                                                                      |
| Multidrug-resistant tuberculosis without extensive drug resistance                                 |
| Extensively drug-resistant tuberculosis                                                            |
| Latent tuberculosis infection                                                                      |
| HIV/AIDS                                                                                           |
| Drug-susceptible HIV/AIDS - Tuberculosis                                                           |
| Drug-susceptible HIV/AIDS - Tuberculosis with mild anemia                                          |
| Drug-susceptible HIV/AIDS - Tuberculosis with moderate anemia                                      |
| Drug-susceptible HIV/AIDS - Tuberculosis with severe anemia                                        |
| Drug-susceptible HIV/AIDS - Tuberculosis without anemia                                            |
| Multidrug-resistant HIV/AIDS - Tuberculosis without extensive drug resistance                      |
| Multidrug-resistant HIV/AIDS - Tuberculosis without extensive drug resistance with mild anemia     |
| Multidrug-resistant HIV/AIDS - Tuberculosis without extensive drug resistance with moderate anemia |
| Multidrug-resistant HIV/AIDS - Tuberculosis without extensive drug resistance with severe anemia   |
| Multidrug-resistant HIV/AIDS - Tuberculosis without extensive drug resistance without anemia       |
| Extensively drug-resistant HIV/AIDS - Tuberculosis                                                 |
| Extensively drug-resistant HIV/AIDS - Tuberculosis with mild anemia                                |
| Extensively drug-resistant HIV/AIDS - Tuberculosis with moderate anemia                            |
| Extensively drug-resistant HIV/AIDS - Tuberculosis with severe anemia                              |
| Extensively drug-resistant HIV/AIDS - Tuberculosis without anemia                                  |
| HIV/AIDS resulting in other diseases                                                               |
| AIDS with antiretroviral treatment with mild anemia                                                |
| AIDS with antiretroviral treatment with moderate anemia                                            |
| AIDS with antiretroviral treatment with severe anemia                                              |
| AIDS with antiretroviral treatment without anemia                                                  |
| AIDS without antiretroviral treatment with mild anemia                                             |
| AIDS without antiretroviral treatment with moderate anemia                                         |
| AIDS without antiretroviral treatment with severe anemia                                           |
| AIDS without antiretroviral treatment without anemia                                               |
| Early HIV with mild anemia                                                                         |
| Early HIV with moderate anemia                                                                     |
| Early HIV with severe anemia                                                                       |
| Early HIV without anemia                                                                           |
| Symptomatic HIV with mild anemia                                                                   |
| Symptomatic HIV with moderate anemia                                                               |
| Symptomatic HIV with severe anemia                                                                 |
| Symptomatic HIV without anemia                                                                     |

|                                                                            |
|----------------------------------------------------------------------------|
| Diarrhea, lower respiratory, and other common infectious diseases          |
| Diarrheal diseases                                                         |
| Guillain-Barré syndrome due to diarrheal diseases                          |
| Mild diarrheal diseases                                                    |
| Moderate diarrheal diseases                                                |
| Severe diarrheal diseases                                                  |
| Intestinal infectious diseases                                             |
| Typhoid fever                                                              |
| Acute typhoid infection                                                    |
| Gastrointestinal bleeding due to typhoid                                   |
| Intestinal perforation due to typhoid                                      |
| Severe typhoid fever                                                       |
| Paratyphoid fever                                                          |
| Acute paratyphoid infection                                                |
| Intestinal perforation due to paratyphoid                                  |
| Moderate paratyphoid fever                                                 |
| Severe paratyphoid fever                                                   |
| Other intestinal infectious diseases                                       |
| Lower respiratory infections                                               |
| Guillain-Barré syndrome due to lower respiratory infections                |
| Moderate lower respiratory infections                                      |
| Severe lower respiratory infections                                        |
| Upper respiratory infections                                               |
| Guillain-Barré syndrome due to upper respiratory infections                |
| Mild upper respiratory infections                                          |
| Moderate upper respiratory infections                                      |
| Otitis media                                                               |
| Acute otitis media                                                         |
| Mild hearing loss due to chronic otitis media                              |
| Mild hearing loss with ringing due to chronic otitis media                 |
| Moderate hearing loss due to chronic otitis media                          |
| Moderate hearing loss with ringing due to chronic otitis media             |
| Severe infectious complications due to chronic otitis media                |
| Vertigo with mild hearing loss and ringing due to chronic otitis media     |
| Vertigo with mild hearing loss due to chronic otitis media                 |
| Vertigo with moderate hearing loss and ringing due to chronic otitis media |
| Vertigo with moderate hearing loss due to chronic otitis media             |
| Meningitis                                                                 |
| Pneumococcal meningitis                                                    |
| Acute pneumococcal meningitis                                              |
| Blindness due to pneumococcal meningitis                                   |
| Borderline intellectual disability due to pneumococcal meningitis          |
| Complete hearing loss due to pneumococcal meningitis                       |



|                                                                                   |
|-----------------------------------------------------------------------------------|
| Complete hearing loss with ringing due to pneumococcal meningitis                 |
| Epilepsy due to pneumococcal meningitis                                           |
| Mild behavioral problems due to pneumococcal meningitis                           |
| Mild hearing loss due to pneumococcal meningitis                                  |
| Mild hearing loss with ringing due to pneumococcal meningitis                     |
| Mild intellectual disability due to pneumococcal meningitis                       |
| Mild motor impairment due to long term due to pneumococcal meningitis             |
| Mild motor plus cognitive impairments due to pneumococcal meningitis              |
| Moderate hearing loss due to pneumococcal meningitis                              |
| Moderate hearing loss with ringing due to pneumococcal meningitis                 |
| Moderate motor impairment due to pneumococcal meningitis                          |
| Moderate motor plus cognitive impairments due to pneumococcal meningitis          |
| Moderate vision impairment due to pneumococcol meningitis                         |
| Moderately severe hearing loss due to pneumococcal meningitis                     |
| Moderately severe hearing loss with ringing due to pneumococcal meningitis        |
| Monocular distance vision loss due to pneumococcal meningitis                     |
| Profound hearing loss due to pneumococcal meningitis                              |
| Profound hearing loss with ringing due to pneumococcal meningitis                 |
| Severe hearing loss due to pneumococcal meningitis                                |
| Severe hearing loss with ringing due to pneumococcal meningitis                   |
| Severe motor impairment due to pneumococcal meningitis                            |
| Severe motor plus cognitive impairments due to pneumococcal meningitis            |
| Severe vision impairment due to pneumococcol meningitis                           |
| H influenzae type B meningitis                                                    |
| Acute H influenzae type B meningitis                                              |
| Blindness due to H influenzae type B meningitis                                   |
| Borderline intellectual disability due to H influenzae type B meningitis          |
| Complete hearing loss due to H influenzae type B meningitis                       |
| Complete hearing loss with ringing due to H influenzae type B meningitis          |
| Epilepsy due to H influenzae type B meningitis                                    |
| Mild behavioral problems due to H influenzae type B meningitis                    |
| Mild hearing loss due to H influenzae type B meningitis                           |
| Mild hearing loss with ringing due to H influenzae type B meningitis              |
| Mild intellectual disability due to H influenzae type B meningitis                |
| Mild motor impairment due to long term due to H influenzae type B meningitis      |
| Mild motor plus cognitive impairments due to H influenzae type B meningitis       |
| Moderate hearing loss due to H influenzae type B meningitis                       |
| Moderate hearing loss with ringing due to H influenzae type B meningitis          |
| Moderate motor impairment due to H influenzae type B meningitis                   |
| Moderate motor plus cognitive impairments due to H influenzae type B meningitis   |
| Moderate vision impairment due to H influenza type B meningitis                   |
| Moderately severe hearing loss due to H influenzae type B meningitis              |
| Moderately severe hearing loss with ringing due to H influenzae type B meningitis |

|                                                                               |
|-------------------------------------------------------------------------------|
| Monocular distance vision loss due to H influenzae type B meningitis          |
| Profound hearing loss due to H influenzae type B meningitis                   |
| Profound hearing loss with ringing due to H influenzae type B meningitis      |
| Severe hearing loss due to H influenzae type B meningitis                     |
| Severe hearing loss with ringing due to H influenzae type B meningitis        |
| Severe motor impairment due to H influenzae type B meningitis                 |
| Severe motor plus cognitive impairments due to H influenzae type B meningitis |
| Severe vision impairment due to H influenza type B meningitis                 |
| Meningococcal meningitis                                                      |
| Acute meningococcal meningitis                                                |
| Blindness due to meningococcal meningitis                                     |
| Borderline intellectual disability due to meningococcal meningitis            |
| Complete hearing loss due to meningococcal meningitis                         |
| Complete hearing loss with ringing due to meningococcal meningitis            |
| Epilepsy due to meningococcal meningitis                                      |
| Mild behavioral problems due to meningococcal meningitis                      |
| Mild hearing loss due to meningococcal meningitis                             |
| Mild hearing loss with ringing due to meningococcal meningitis                |
| Mild intellectual disability due to meningococcal meningitis                  |
| Mild motor impairment due to long term due to meningococcal meningitis        |
| Mild motor plus cognitive impairments due to meningococcal meningitis         |
| Moderate hearing loss due to meningococcal meningitis                         |
| Moderate hearing loss with ringing due to meningococcal meningitis            |
| Moderate motor impairment due to meningococcal meningitis                     |
| Moderate motor plus cognitive impairments due to meningococcal meningitis     |
| Moderate vision impairment due to meningococcal meningitis                    |
| Moderately severe hearing loss due to meningococcal meningitis                |
| Moderately severe hearing loss with ringing due to meningococcal meningitis   |
| Monocular distance vision loss due to meningococcal meningitis                |
| Profound hearing loss due to meningococcal meningitis                         |
| Profound hearing loss with ringing due to meningococcal meningitis            |
| Severe hearing loss due to meningococcal meningitis                           |
| Severe hearing loss with ringing due to meningococcal meningitis              |
| Severe motor impairment due to meningococcal meningitis                       |
| Severe motor plus cognitive impairments due to meningococcal meningitis       |
| Severe vision impairment due to meningococcal meningitis                      |
| Other meningitis                                                              |
| Acute viral meningitis                                                        |
| Blindness due to other bacterial meningitis                                   |
| Borderline intellectual disability due to other bacterial meningitis          |
| Complete hearing loss due to other bacterial meningitis                       |
| Complete hearing loss with ringing due to other bacterial meningitis          |
| Epilepsy due to other meningitis                                              |

|                                                                               |
|-------------------------------------------------------------------------------|
| Mild behavioral problems due to other bacterial meningitis                    |
| Mild hearing loss due to other bacterial meningitis                           |
| Mild hearing loss due with ringing to other bacterial meningitis              |
| Mild intellectual disability due to other bacterial meningitis                |
| Mild motor impairment due to long term due to other bacterial meningitis      |
| Mild motor plus cognitive impairments due to other bacterial meningitis       |
| Moderate hearing loss due to other bacterial meningitis                       |
| Moderate hearing loss with ringing due to other bacterial meningitis          |
| Moderate motor impairment due to other bacterial meningitis                   |
| Moderate motor plus cognitive impairments due to other bacterial meningitis   |
| Moderate vision impairment due to other bacterial meningitis                  |
| Moderately severe hearing loss due to other bacterial meningitis              |
| Moderately severe hearing loss with ringing due to other bacterial meningitis |
| Monocular distance vision loss due to other bacterial meningitis              |
| Other acute bacterial meningitis                                              |
| Profound hearing loss due to other bacterial meningitis                       |
| Profound hearing loss with ringing due to other bacterial meningitis          |
| Severe hearing loss due to other bacterial meningitis                         |
| Severe hearing loss with ringing due to other bacterial meningitis            |
| Severe motor impairment due to other bacterial meningitis                     |
| Severe motor plus cognitive impairments due to other bacterial meningitis     |
| Severe vision impairment due to other bacterial meningitis                    |
| Encephalitis                                                                  |
| Acute encephalitis                                                            |
| Blindness due to encephalitis                                                 |
| Borderline intellectual disability due to encephalitis                        |
| Epilepsy due to encephalitis                                                  |
| Mild behavioral problems due to encephalitis                                  |
| Mild intellectual disability due to encephalitis                              |
| Mild motor impairment due to long term due to encephalitis                    |
| Mild motor plus cognitive impairments due to encephalitis                     |
| Moderate motor impairment due to encephalitis                                 |
| Moderate motor plus cognitive impairments due to encephalitis                 |
| Moderate vision impairment due to encephalitis                                |
| Monocular distance vision loss due to encephalitis                            |
| Severe motor impairment due to encephalitis                                   |
| Severe motor plus cognitive impairments due to encephalitis                   |
| Severe vision impairment due to encephalitis                                  |
| Diphtheria                                                                    |
| Moderate diphtheria                                                           |
| Severe diphtheria                                                             |
| Whooping cough                                                                |
| Tetanus                                                                       |

|                                                                                              |
|----------------------------------------------------------------------------------------------|
| Mild motor impairment due to neonatal tetanus                                                |
| Mild motor plus cognitive impairments due to neonatal tetanus                                |
| Moderate motor impairment due to neonatal tetanus                                            |
| Moderate motor impairment with blindness and epilepsy due to neonatal tetanus                |
| Moderate motor impairment with blindness due to neonatal tetanus                             |
| Moderate motor impairment with epilepsy due to neonatal tetanus                              |
| Moderate motor plus cognitive impairment with blindness and epilepsy due to neonatal tetanus |
| Moderate motor plus cognitive impairment with blindness due to neonatal tetanus              |
| Moderate motor plus cognitive impairment with epilepsy due to neonatal tetanus               |
| Severe motor impairment due to neonatal tetanus                                              |
| Severe motor impairment with blindness and epilepsy due to neonatal tetanus                  |
| Severe motor impairment with blindness due to neonatal tetanus                               |
| Severe motor impairment with epilepsy due to neonatal tetanus                                |
| Severe motor plus cognitive impairment with blindness and epilepsy due to neonatal tetanus   |
| Severe motor plus cognitive impairment with blindness due to neonatal tetanus                |
| Severe motor plus cognitive impairment with epilepsy due to neonatal tetanus                 |
| Severe tetanus                                                                               |
| Measles                                                                                      |
| Moderate measles                                                                             |
| Severe measles                                                                               |
| Varicella and herpes zoster                                                                  |
| Chickenpox                                                                                   |
| Herpes zoster                                                                                |
| Neglected tropical diseases and malaria                                                      |
| Malaria                                                                                      |
| Asymptomatic malaria parasitemia (PfPR)                                                      |
| Mild anemia due to malaria parasitemia (PfPR)                                                |
| Mild malaria                                                                                 |
| Mild malaria with mild anemia                                                                |
| Mild malaria with moderate anemia                                                            |
| Mild malaria with severe anemia                                                              |
| Moderate anemia due to malaria parasitemia (PfPR)                                            |
| Moderate malaria                                                                             |
| Moderate malaria with mild anemia                                                            |
| Moderate malaria with moderate anemia                                                        |
| Moderate malaria with severe anemia                                                          |
| Moderate motor impairment due to malaria                                                     |
| Moderate motor impairment with blindness and epilepsy due to malaria                         |
| Moderate motor impairment with blindness due to malaria                                      |
| Moderate motor impairment with epilepsy due to malaria                                       |
| Moderate motor plus cognitive impairment with blindness and epilepsy due to malaria          |
| Moderate motor plus cognitive impairment with blindness due to malaria                       |
| Moderate motor plus cognitive impairment with epilepsy due to malaria                        |

|                                                                                   |
|-----------------------------------------------------------------------------------|
| Severe anemia due to malaria parasitemia (PfPR)                                   |
| Severe malaria                                                                    |
| Severe malaria with mild anemia                                                   |
| Severe malaria with moderate anemia                                               |
| Severe malaria with severe anemia                                                 |
| Severe motor impairment due to malaria                                            |
| Severe motor impairment with blindness and epilepsy due to malaria                |
| Severe motor impairment with blindness due to malaria                             |
| Severe motor impairment with epilepsy due to malaria                              |
| Severe motor plus cognitive impairment with blindness and epilepsy due to malaria |
| Severe motor plus cognitive impairment with blindness due to malaria              |
| Severe motor plus cognitive impairment with epilepsy due to malaria               |
| Chagas disease                                                                    |
| Acute Chagas disease                                                              |
| Asymptomatic Chagas disease                                                       |
| Asymptomatic and mild heart failure due to Chagas disease                         |
| Atrial fibrillation and flutter due to Chagas disease                             |
| Mild chronic digestive disease due to Chagas disease                              |
| Moderate chronic digestive disease due to Chagas disease                          |
| Moderate heart failure due to Chagas disease                                      |
| Severe heart failure due to Chagas disease                                        |
| Leishmaniasis                                                                     |
| Visceral leishmaniasis                                                            |
| Moderate visceral leishmaniasis                                                   |
| Severe visceral leishmaniasis                                                     |
| Cutaneous and mucocutaneous leishmaniasis                                         |
| African trypanosomiasis                                                           |
| Skin disfigurement due to Trypanosoma brucei gambiense                            |
| Skin disfigurement due to Trypanosoma brucei rhodesiense                          |
| Sleeping sickness due to Trypanosoma brucei gambiense                             |
| Sleeping sickness due to Trypanosoma brucei rhodesiense                           |
| Schistosomiasis                                                                   |
| Ascites due to schistosomiasis                                                    |
| Bladder pathology due to schistosomiasis                                          |
| Dysuria due to schistosomiasis                                                    |
| Hematemesis due to schistosomiasis                                                |
| Hepatomegaly due to schistosomiasis                                               |
| Hydronephrosis due to schistosomiasis                                             |
| Mild anemia due to schistosomiasis                                                |
| Mild diarrhea due to schistosomiasis                                              |
| Mild schistosomiasis                                                              |
| Moderate anemia due to schistosomiasis                                            |
| Severe anemia due to schistosomiasis                                              |

|                                                                   |
|-------------------------------------------------------------------|
| Cysticercosis                                                     |
| Neurocysticercosis with epilepsy                                  |
| Cystic echinococcosis                                             |
| Abdominal problems due to cystic echinococcosis                   |
| Chronic respiratory disease due to cystic echinococcosis          |
| Epilepsy due to echinococcosis                                    |
| Lymphatic filariasis                                              |
| Acute adenolymphangitis due to lymphatic filariasis               |
| Hydrocele due to lymphatic filariasis                             |
| Lymphedema due to lymphatic filariasis                            |
| Prevalence of detectable microfilaria due to lymphatic filariasis |
| Onchocerciasis                                                    |
| Asymptomatic onchocerciasis                                       |
| Blindness due to onchocerciasis                                   |
| Mild skin disease due to onchocerciasis                           |
| Mild skin disease without itch due to onchocerciasis              |
| Moderate skin disease due to onchocerciasis                       |
| Moderate vision impairment due to onchocerciasis                  |
| Severe skin disease due to onchocerciasis                         |
| Severe skin disease without itch due to onchocerciasis            |
| Severe vision impairment due to onchocerciasis                    |
| Trachoma                                                          |
| Blindness due to trachoma                                         |
| Moderate vision impairment due to trachoma                        |
| Severe vision impairment due to trachoma                          |
| Dengue                                                            |
| Moderate dengue                                                   |
| Post-dengue chronic fatigue syndrome                              |
| Severe dengue                                                     |
| Yellow fever                                                      |
| Asymptomatic yellow fever                                         |
| Moderate yellow fever                                             |
| Severe yellow fever                                               |
| Rabies                                                            |
| Intestinal nematode infections                                    |
| Ascariasis                                                        |
| Asymptomatic ascariasis                                           |
| Heavy infestation of ascariasis                                   |
| Mild abdominopelvic problems due to ascariasis                    |
| Severe wasting due to ascariasis                                  |
| Trichuriasis                                                      |
| Asymptomatic trichuriasis                                         |
| Heavy infestation of trichuriasis                                 |

|                                                                  |
|------------------------------------------------------------------|
| Mild abdominopelvic problems due to trichuriasis                 |
| Severe wasting due to trichuriasis                               |
| Hookworm disease                                                 |
| Asymptomatic hookworm disease                                    |
| Heavy infestation of hookworm                                    |
| Mild abdominopelvic problems due to hookworm disease             |
| Mild anemia due to hookworm disease                              |
| Moderate anemia due to hookworm disease                          |
| Severe anemia due to hookworm disease                            |
| Severe wasting due to hookworm disease                           |
| Food-borne trematodiasis                                         |
| Asymptomatic clonorchiasis                                       |
| Asymptomatic fascioliasis                                        |
| Asymptomatic intestinal fluke infection                          |
| Asymptomatic opisthorchiasis                                     |
| Asymptomatic paragonimiasis                                      |
| Cerebral paragonimiasis                                          |
| Heavy clonorchiasis due to food-borne trematodiasis              |
| Heavy fascioliasis due to food-borne trematodiasis               |
| Heavy intestinal fluke infection due to food-borne trematodiasis |
| Heavy opisthorchiasis due to food-borne trematodiasis            |
| Mild paragonimiasis due to food-borne trematodiasis              |
| Moderate paragonimiasis due to food-borne trematodiasis          |
| Severe paragonimiasis due to food-borne trematodiasis            |
| Leprosy                                                          |
| Disfigurement level 1 due to leprosy                             |
| Disfigurement level 2 due to leprosy                             |
| Ebola                                                            |
| Ebola cases                                                      |
| Post-Ebola chronic fatigue syndrome                              |
| Zika virus                                                       |
| Acute Zika infection                                             |
| Asymptomatic Zika infection                                      |
| Congenital Zika syndrome                                         |
| Guillain–Barré syndrome due to Zika infection                    |
| Guinea worm disease                                              |
| Mild pain due to Guinea worm emergence                           |
| Moderate pain due to Guinea worm emergence                       |
| Moderate reduced mobility due to Guinea worm emergence           |
| Other neglected tropical diseases                                |
| Acute infection due to other neglected tropical diseases         |
| Mild anemia due to other neglected tropical diseases             |
| Moderate anemia due to other neglected tropical diseases         |

|                                                                                            |
|--------------------------------------------------------------------------------------------|
| Severe anemia due to other neglected tropical diseases                                     |
| Maternal disorders                                                                         |
| Maternal hemorrhage                                                                        |
| Maternal hemorrhage (< 1L blood lost)                                                      |
| Maternal hemorrhage (> 1L blood lost)                                                      |
| Mild anemia due to maternal hemorrhage                                                     |
| Moderate anemia due to maternal hemorrhage                                                 |
| Severe anemia due to maternal hemorrhage                                                   |
| Maternal sepsis and other maternal infections                                              |
| Infertility due to puerperal sepsis                                                        |
| Other maternal infections                                                                  |
| Puerperal sepsis                                                                           |
| Maternal hypertensive disorders                                                            |
| Eclampsia                                                                                  |
| Long term sequelae of eclampsia                                                            |
| Long term sequelae of severe pre-eclampsia                                                 |
| Other hypertensive disorders of pregnancy                                                  |
| Severe pre-eclampsia                                                                       |
| Maternal obstructed labor and uterine rupture                                              |
| Obstructed labor, acute event                                                              |
| Rectovaginal fistula                                                                       |
| Vesicovaginal fistula                                                                      |
| Maternal abortion, miscarriage, and ectopic pregnancy                                      |
| Ectopic Pregnancy                                                                          |
| Maternal abortive outcome                                                                  |
| Indirect maternal deaths                                                                   |
| Late maternal deaths                                                                       |
| Maternal deaths aggravated by HIV/AIDS                                                     |
| Other maternal disorders                                                                   |
| Neonatal disorders                                                                         |
| Neonatal preterm birth complications                                                       |
| Asymptomatic neonatal preterm birth 28-<32 wks                                             |
| Asymptomatic neonatal preterm birth 32-<37wks                                              |
| Asymptomatic neonatal preterm birth <28wks                                                 |
| Asymptomatic retinopathy of prematurity                                                    |
| Blindness due to retinopathy of prematurity                                                |
| Mild motor impairment due to neonatal preterm birth complications 28-32wks                 |
| Mild motor impairment due to neonatal preterm birth complications 32-36wks                 |
| Mild motor impairment due to neonatal preterm birth complications <28wks                   |
| Mild motor plus cognitive impairments due to neonatal preterm birth complications 28-32wks |
| Mild motor plus cognitive impairments due to neonatal preterm birth complications 32-36wks |
| Mild motor plus cognitive impairments due to neonatal preterm birth complications <28wks   |
| Mild vision impairment due to retinopathy of prematurity                                   |





|                                                                                                                                      |
|--------------------------------------------------------------------------------------------------------------------------------------|
| Severe motor plus cognitive impairment with epilepsy due to neonatal preterm birth complications 28-32wks                            |
| Severe motor plus cognitive impairment with epilepsy due to neonatal preterm birth complications 32-36wks                            |
| Severe motor plus cognitive impairment with epilepsy due to neonatal preterm birth complications <28wks                              |
| Severe vision impairment due to retinopathy of prematurity                                                                           |
| Neonatal encephalopathy due to birth asphyxia and trauma                                                                             |
| Asymptomatic neonatal encephalopathy due to birth asphyxia and trauma                                                                |
| Mild motor impairment due to neonatal encephalopathy due to birth asphyxia and trauma                                                |
| Mild motor plus cognitive impairments due to neonatal encephalopathy due to birth asphyxia and trauma                                |
| Moderate motor impairment due to neonatal encephalopathy due to birth asphyxia and trauma                                            |
| Moderate motor impairment with blindness and epilepsy due to neonatal encephalopathy due to birth asphyxia and trauma                |
| Moderate motor impairment with blindness due to neonatal encephalopathy due to birth asphyxia and trauma                             |
| Moderate motor impairment with epilepsy due to neonatal encephalopathy due to birth asphyxia and trauma                              |
| Moderate motor plus cognitive impairment with blindness and epilepsy due to neonatal encephalopathy due to birth asphyxia and trauma |
| Moderate motor plus cognitive impairment with blindness due to neonatal encephalopathy due to birth asphyxia and trauma              |
| Moderate motor plus cognitive impairment with epilepsy due to neonatal encephalopathy due to birth asphyxia and trauma               |
| Severe motor impairment due to neonatal encephalopathy due to birth asphyxia and trauma                                              |
| Severe motor impairment with blindness and epilepsy due to neonatal encephalopathy due to birth asphyxia and trauma                  |
| Severe motor impairment with blindness due to neonatal encephalopathy due to birth asphyxia and trauma                               |
| Severe motor impairment with epilepsy due to neonatal encephalopathy due to birth asphyxia and trauma                                |
| Severe motor plus cognitive impairment with blindness and epilepsy due to neonatal encephalopathy due to birth asphyxia and trauma   |
| Severe motor plus cognitive impairment with blindness due to neonatal encephalopathy due to birth asphyxia and trauma                |
| Severe motor plus cognitive impairment with epilepsy due to neonatal encephalopathy due to birth asphyxia and trauma                 |
| Neonatal sepsis and other neonatal infections                                                                                        |
| Asymptomatic neonatal sepsis and other neonatal infections                                                                           |
| Mild motor impairment due to neonatal sepsis and other neonatal infections                                                           |
| Mild motor plus cognitive impairments due to neonatal sepsis and other neonatal infections                                           |
| Moderate motor impairment due to neonatal sepsis and other neonatal infections                                                       |
| Moderate motor impairment with blindness and epilepsy due to neonatal sepsis and other neonatal infections                           |
| Moderate motor impairment with blindness due to neonatal sepsis and other neonatal infections                                        |
| Moderate motor impairment with epilepsy due to neonatal sepsis and other neonatal infections                                         |
| Moderate motor plus cognitive impairment with blindness and epilepsy due to neonatal sepsis and other neonatal infections            |
| Moderate motor plus cognitive impairment with blindness due to neonatal sepsis and other neonatal infections                         |
| Moderate motor plus cognitive impairment with epilepsy due to neonatal sepsis and other neonatal infections                          |
| Severe infection due to neonatal sepsis and other neonatal infections                                                                |
| Severe motor impairment due to neonatal sepsis and other neonatal infections                                                         |
| Severe motor impairment with blindness and epilepsy due to neonatal sepsis and other neonatal infections                             |
| Severe motor impairment with blindness due to neonatal sepsis and other neonatal infections                                          |
| Severe motor impairment with epilepsy due to neonatal sepsis and other neonatal infections                                           |

|                                                                                                                           |
|---------------------------------------------------------------------------------------------------------------------------|
| Severe motor plus cognitive impairment with blindness and epilepsy due to neonatal sepsis and other neonatal infections   |
| Severe motor plus cognitive impairment with blindness due to neonatal sepsis and other neonatal infections                |
| Severe motor plus cognitive impairment with epilepsy due to neonatal sepsis and other neonatal infections                 |
| Hemolytic disease and other neonatal jaundice                                                                             |
| Moderate motor impairment due to hemolytic disease and other neonatal jaundice                                            |
| Moderate motor impairment with blindness and epilepsy due to hemolytic disease and other neonatal jaundice                |
| Moderate motor impairment with blindness due to hemolytic disease and other neonatal jaundice                             |
| Moderate motor impairment with epilepsy due to hemolytic disease and other neonatal jaundice                              |
| Moderate motor plus cognitive impairment with blindness and epilepsy due to hemolytic disease and other neonatal jaundice |
| Moderate motor plus cognitive impairment with blindness due to hemolytic disease and other neonatal jaundice              |
| Moderate motor plus cognitive impairment with epilepsy due to hemolytic disease and other neonatal jaundice               |
| Severe motor impairment severe due to hemolytic disease and other neonatal jaundice                                       |
| Severe motor impairment with blindness and epilepsy due to hemolytic disease and other neonatal jaundice                  |
| Severe motor impairment with blindness due to hemolytic disease and other neonatal jaundice                               |
| Severe motor impairment with epilepsy due to hemolytic disease and other neonatal jaundice                                |
| Severe motor plus cognitive impairment with blindness and epilepsy due to hemolytic disease and other neonatal jaundice   |
| Severe motor plus cognitive impairment with blindness due to hemolytic disease and other neonatal jaundice                |
| Severe motor plus cognitive impairment with epilepsy due to hemolytic disease and other neonatal jaundice                 |
| Other neonatal disorders                                                                                                  |
| Nutritional deficiencies                                                                                                  |
| Protein-energy malnutrition                                                                                               |
| Moderate wasting with edema                                                                                               |
| Moderate wasting without edema                                                                                            |
| Severe wasting with edema                                                                                                 |
| Severe wasting without edema                                                                                              |
| Iodine deficiency                                                                                                         |
| Visible goiter with profound intellectual disability and mild heart failure due to iodine deficiency                      |
| Visible goiter with profound intellectual disability and moderate heart failure due to iodine deficiency                  |
| Visible goiter with profound intellectual disability due to iodine deficiency                                             |
| Visible goiter with profound intellectual disability with severe heart failure due to iodine deficiency                   |
| Visible goiter with severe intellectual disability due to iodine deficiency                                               |
| Visible goiter with symptoms without intellectual disability or heart failure                                             |
| Visible goiter without symptoms                                                                                           |
| Vitamin A deficiency                                                                                                      |
| Asymptomatic vitamin A deficiency                                                                                         |
| Blindness due to vitamin A deficiency                                                                                     |
| Moderate vision impairment loss due to vitamin A deficiency                                                               |
| Severe vision impairment loss due to vitamin A deficiency                                                                 |
| Iron-deficiency anemia                                                                                                    |
| Asymptomatic and mild heart failure due to iron-deficiency anemia                                                         |
| Mild iron-deficiency anemia                                                                                               |

|                                                                                                              |
|--------------------------------------------------------------------------------------------------------------|
| Moderate heart failure due to iron-deficiency anemia                                                         |
| Moderate iron-deficiency anemia                                                                              |
| Severe heart failure due to iron-deficiency anemia                                                           |
| Severe iron-deficiency anemia                                                                                |
| Other nutritional deficiencies                                                                               |
| Other communicable, maternal, neonatal, and nutritional diseases                                             |
| Sexually transmitted diseases excluding HIV                                                                  |
| Syphilis                                                                                                     |
| Asymptomatic adult tertiary syphilis                                                                         |
| Asymptomatic early syphilis infection                                                                        |
| Cardiovascular complications due to adult tertiary syphilis                                                  |
| Mild early syphilis infection                                                                                |
| Neurological problems and cardiovascular complications due to adult tertiary syphilis                        |
| Neurological problems due to adult tertiary syphilis                                                         |
| Severe disfigurement and cardiovascular complications due to adult tertiary syphilis                         |
| Severe disfigurement and neurological problems due to adult tertiary syphilis                                |
| Severe disfigurement due to adult tertiary syphilis                                                          |
| Severe disfigurement, neurological problems, and cardiovascular complications due to adult tertiary syphilis |
| Chlamydial infection                                                                                         |
| Asymptomatic chlamydial infection                                                                            |
| Epididymo-orchitis due to chlamydial infection                                                               |
| Mild chlamydial infection                                                                                    |
| Moderate pelvic inflammatory diseases due to chlamydial infection                                            |
| Primary infertility due to chlamydial infection                                                              |
| Secondary infertility due to chlamydial infection                                                            |
| Severe pelvic inflammatory diseases due to chlamydial infection                                              |
| Gonococcal infection                                                                                         |
| Asymptomatic gonococcal infection                                                                            |
| Epididymo-orchitis due to gonococcal infection                                                               |
| Mild gonococcal infection                                                                                    |
| Moderate pelvic inflammatory diseases due to gonococcal infection                                            |
| Primary infertility due to gonococcal infection                                                              |
| Secondary infertility due to gonococcal infection                                                            |
| Severe pelvic inflammatory diseases due to gonococcal infection                                              |
| Trichomoniasis                                                                                               |
| Acute trichomoniasis infection                                                                               |
| Asymptomatic trichomoniasis infection                                                                        |
| Genital herpes                                                                                               |
| Asymptomatic genital herpes                                                                                  |
| Moderate infection due to initial genital herpes episode                                                     |
| Symptomatic genital herpes                                                                                   |
| Other sexually transmitted diseases                                                                          |
| Moderate pelvic inflammatory diseases due to other sexually transmitted diseases                             |

|                                                                                |
|--------------------------------------------------------------------------------|
| Primary infertility due to other sexually transmitted diseases                 |
| Secondary infertility due to other sexually transmitted diseases               |
| Severe pelvic inflammatory diseases due to other sexually transmitted diseases |
| Hepatitis                                                                      |
| Acute hepatitis A                                                              |
| Asymptomatic acute hepatitis A                                                 |
| Moderate acute hepatitis A                                                     |
| Severe acute hepatitis A                                                       |
| Hepatitis B                                                                    |
| Asymptomatic acute hepatitis B                                                 |
| Chronic hepatitis B                                                            |
| Moderate acute hepatitis B                                                     |
| Severe acute hepatitis B                                                       |
| Hepatitis C                                                                    |
| Asymptomatic acute hepatitis C                                                 |
| Chronic hepatitis C                                                            |
| Moderate acute hepatitis C                                                     |
| Severe acute hepatitis C                                                       |
| Acute hepatitis E                                                              |
| Asymptomatic acute hepatitis E                                                 |
| Moderate acute hepatitis E                                                     |
| Severe acute hepatitis E                                                       |
| Other infectious diseases                                                      |
| Guillain-Barré syndrome due to other infectious diseases                       |
| Mild anemia due to other infectious diseases                                   |
| Moderate anemia due to other infectious diseases                               |
| Severe anemia due to other infectious diseases                                 |
| Non-communicable diseases                                                      |
| Neoplasms                                                                      |
| Lip and oral cavity cancer                                                     |
| Controlled phase of mouth cancer                                               |
| Diagnosis and primary therapy phase of mouth cancer                            |
| Metastatic phase of mouth cancer                                               |
| Terminal phase of mouth cancer                                                 |
| Nasopharynx cancer                                                             |
| Controlled phase of nasopharynx cancer                                         |
| Diagnosis and primary therapy phase of nasopharynx cancer                      |
| Metastatic phase of nasopharynx cancer                                         |
| Terminal phase of nasopharynx cancer                                           |
| Other pharynx cancer                                                           |
| Controlled phase of other pharynx cancer                                       |
| Diagnosis and primary therapy phase of other pharynx cancer                    |
| Metastatic phase of other pharynx cancer                                       |

|                                                                             |
|-----------------------------------------------------------------------------|
| Terminal phase of other pharynx cancer                                      |
| Esophageal cancer                                                           |
| Controlled phase of esophageal cancer                                       |
| Diagnosis and primary therapy phase of esophageal cancer                    |
| Metastatic phase of esophageal cancer                                       |
| Terminal phase of esophageal cancer                                         |
| Stomach cancer                                                              |
| Controlled phase of stomach cancer                                          |
| Diagnosis and primary therapy phase of stomach cancer                       |
| Metastatic phase of stomach cancer                                          |
| Terminal phase of stomach cancer                                            |
| Colon and rectum cancer                                                     |
| Controlled phase of colon and rectum cancers                                |
| Diagnosis and primary therapy phase of colon and rectum cancers             |
| Metastatic phase of colon and rectum cancers                                |
| Stoma due to colon and rectum cancer                                        |
| Terminal phase of colon and rectum cancers                                  |
| Liver cancer                                                                |
| Liver cancer due to hepatitis B                                             |
| Controlled phase of liver cancer due to hepatitis B                         |
| Diagnosis and primary therapy phase of liver cancer due to hepatitis B      |
| Metastatic phase of liver cancer due to hepatitis B                         |
| Terminal phase of liver cancer due to hepatitis B                           |
| Liver cancer due to hepatitis C                                             |
| Controlled phase of liver cancer due to hepatitis C                         |
| Diagnosis and primary therapy phase of liver cancer due to hepatitis C      |
| Metastatic phase of liver cancer due to hepatitis C                         |
| Terminal phase of liver cancer due to hepatitis C                           |
| Liver cancer due to alcohol use                                             |
| Controlled phase of liver cancer due to alcohol use                         |
| Diagnosis and primary therapy phase of liver cancer due to alcohol use      |
| Metastatic phase of liver cancer due to alcohol use                         |
| Terminal phase of liver cancer due to alcohol use                           |
| Liver cancer due to other causes                                            |
| Controlled phase of liver cancer due to other causes                        |
| Diagnosis and primary therapy phase of liver cancer due to other causes     |
| Metastatic phase of liver cancer due to other causes                        |
| Terminal phase of liver cancer due to other causes                          |
| Gallbladder and biliary tract cancer                                        |
| Controlled phase of gallbladder and biliary tract cancer                    |
| Diagnosis and primary therapy phase of gallbladder and biliary tract cancer |
| Metastatic phase of gallbladder and biliary tract cancer                    |
| Terminal phase of gallbladder and biliary tract cancer                      |

|                                                                           |
|---------------------------------------------------------------------------|
| Pancreatic cancer                                                         |
| Controlled phase of pancreatic cancer                                     |
| Diagnosis and primary therapy phase of pancreatic cancer                  |
| Metastatic phase of pancreatic cancer                                     |
| Terminal phase of pancreatic cancer                                       |
| Larynx cancer                                                             |
| Controlled phase of larynx cancer                                         |
| Diagnosis and primary therapy phase of larynx cancer                      |
| Laryngectomy due to larynx cancer                                         |
| Metastatic phase of larynx cancer                                         |
| Terminal phase of larynx cancer                                           |
| Tracheal, bronchus, and lung cancer                                       |
| Controlled phase of lung, bronchus, and trachea cancer                    |
| Diagnosis and primary therapy phase of lung, bronchus, and trachea cancer |
| Metastatic phase of lung, bronchus, and trachea cancer                    |
| Terminal phase of lung, bronchus, and trachea cancer                      |
| Malignant skin melanoma                                                   |
| Controlled phase of malignant skin melanoma                               |
| Diagnosis and primary therapy phase of malignant skin melanoma            |
| Metastatic phase of malignant skin melanoma                               |
| Terminal phase of malignant skin melanoma                                 |
| Non-melanoma skin cancer                                                  |
| Non-melanoma skin cancer (squamous-cell carcinoma)                        |
| Mild disfigurement due to squamous cell carcinoma                         |
| Moderate disfigurement due to squamous cell carcinoma                     |
| Severe disfigurement due to squamous cell carcinoma                       |
| Non-melanoma skin cancer (basal-cell carcinoma)                           |
| Disfigurement due to basal cell carcinoma                                 |
| Breast cancer                                                             |
| Controlled phase of breast cancer                                         |
| Diagnosis and primary therapy phase of breast cancer                      |
| Mastectomy due to breast cancer                                           |
| Metastatic phase of breast cancer                                         |
| Terminal phase of breast cancer                                           |
| Cervical cancer                                                           |
| Controlled phase of cervical cancer                                       |
| Diagnosis and primary therapy phase of cervical cancer                    |
| Metastatic phase of cervical cancer                                       |
| Terminal phase of cervical cancer                                         |
| Uterine cancer                                                            |
| Controlled phase of uterine cancer                                        |
| Diagnosis and primary therapy phase of uterine cancer                     |
| Metastatic phase of uterine cancer                                        |

|                                                                         |
|-------------------------------------------------------------------------|
| Terminal phase of uterine cancer                                        |
| Ovarian cancer                                                          |
| Controlled phase of ovarian cancer                                      |
| Diagnosis and primary therapy phase of ovarian cancer                   |
| Metastatic phase of ovarian cancer                                      |
| Terminal phase of ovarian cancer                                        |
| Prostate cancer                                                         |
| Controlled phase of prostate cancer                                     |
| Diagnosis and primary therapy phase of prostate cancer                  |
| Impotence due to prostate cancer                                        |
| Incontinence due to prostate cancer                                     |
| Metastatic phase of prostate cancer                                     |
| Terminal phase of prostate cancer                                       |
| Testicular cancer                                                       |
| Controlled phase of testicular cancer                                   |
| Diagnosis and primary therapy phase of testicular cancer                |
| Metastatic phase of testicular cancer                                   |
| Terminal phase of testicular cancer                                     |
| Kidney cancer                                                           |
| Controlled phase of kidney cancer                                       |
| Diagnosis and primary therapy phase of kidney cancer                    |
| Metastatic phase of kidney cancer                                       |
| Terminal phase of kidney cancer                                         |
| Bladder cancer                                                          |
| Controlled phase of bladder cancer                                      |
| Diagnosis and primary therapy phase of bladder cancer                   |
| Metastatic phase of bladder cancer                                      |
| Terminal phase of bladder cancer                                        |
| Urinary incontinence due to bladder cancer                              |
| Brain and nervous system cancer                                         |
| Controlled phase of brain and nervous system cancers                    |
| Diagnosis and primary therapy phase of brain and nervous system cancers |
| Metastatic phase of brain and nervous system cancers                    |
| Terminal phase of brain and nervous system cancers                      |
| Thyroid cancer                                                          |
| Controlled phase of thyroid cancer                                      |
| Diagnosis and primary therapy phase of thyroid cancer                   |
| Metastatic phase of thyroid cancer                                      |
| Terminal phase of thyroid cancer                                        |
| Mesothelioma                                                            |
| Controlled phase of mesothelioma                                        |
| Diagnosis and primary therapy phase of mesothelioma                     |
| Metastatic phase of mesothelioma                                        |



|                                                                  |
|------------------------------------------------------------------|
| Terminal phase of mesothelioma                                   |
| Hodgkin lymphoma                                                 |
| Controlled phase of Hodgkin disease                              |
| Diagnosis and primary therapy phase of Hodgkin disease           |
| Metastatic phase of Hodgkin disease                              |
| Terminal phase of Hodgkin disease                                |
| Non-Hodgkin lymphoma                                             |
| Controlled phase of non-Hodgkin lymphoma                         |
| Diagnosis and primary therapy phase of non-Hodgkin lymphoma      |
| Metastatic phase of non-Hodgkin lymphoma                         |
| Terminal phase of non-Hodgkin lymphoma                           |
| Multiple myeloma                                                 |
| Controlled phase of multiple myeloma                             |
| Diagnosis and primary therapy phase of multiple myeloma          |
| Metastatic phase of multiple myeloma                             |
| Terminal phase of multiple myeloma                               |
| Leukemia                                                         |
| Acute lymphoid leukemia                                          |
| Controlled phase of acute lymphoid leukemia                      |
| Diagnosis and primary therapy phase of acute lymphoid leukemia   |
| Metastatic phase of acute lymphoid leukemia                      |
| Terminal phase of acute lymphoid leukemia                        |
| Chronic lymphoid leukemia                                        |
| Controlled phase of chronic lymphoid leukemia                    |
| Diagnosis and primary therapy phase of chronic lymphoid leukemia |
| Metastatic phase of chronic lymphoid leukemia                    |
| Terminal phase of chronic lymphoid leukemia                      |
| Acute myeloid leukemia                                           |
| Controlled phase of acute myeloid leukemia                       |
| Diagnosis and primary therapy phase of acute myeloid leukemia    |
| Metastatic phase of acute myeloid leukemia                       |
| Terminal phase of acute myeloid leukemia                         |
| Chronic myeloid leukemia                                         |
| Controlled phase of chronic myeloid leukemia                     |
| Diagnosis and primary therapy phase of chronic myeloid leukemia  |
| Metastatic phase of chronic myeloid leukemia                     |
| Terminal phase of chronic myeloid leukemia                       |
| Other leukemia                                                   |
| Controlled phase of other leukemia                               |
| Diagnosis and primary therapy phase of other leukemia            |
| Metastatic phase of other leukemia                               |
| Terminal phase of other leukemia                                 |
| Other neoplasms                                                  |

|                                                                     |
|---------------------------------------------------------------------|
| Controlled phase of other neoplasms                                 |
| Diagnosis and primary therapy phase of other neoplasms              |
| Metastatic phase of other neoplasms                                 |
| Terminal phase of other neoplasms                                   |
| Cardiovascular diseases                                             |
| Rheumatic heart disease                                             |
| Asymptomatic and mild heart failure due to rheumatic heart disease  |
| Moderate heart failure due to rheumatic heart disease               |
| Rheumatic heart disease, without heart failure                      |
| Severe heart failure due to rheumatic heart disease                 |
| Ischemic heart disease                                              |
| Acute myocardial infarction 3 to 28 days                            |
| Acute myocardial infarction first 2 days                            |
| Asymptomatic and mild heart failure due to ischemic heart disease   |
| Asymptomatic angina due to ischemic heart disease                   |
| Asymptomatic ischemic heart disease following myocardial infarction |
| Mild angina due to ischemic heart disease                           |
| Moderate angina due to ischemic heart disease                       |
| Moderate heart failure due to ischemic heart disease                |
| Severe angina due to ischemic heart disease                         |
| Severe heart failure due to ischemic heart disease                  |
| Cerebrovascular disease                                             |
| Ischemic stroke                                                     |
| Acute ischemic stroke severity level 1                              |
| Acute ischemic stroke severity level 2                              |
| Acute ischemic stroke severity level 3                              |
| Acute ischemic stroke severity level 4                              |
| Acute ischemic stroke severity level 5                              |
| Asymptomatic chronic ischemic stroke                                |
| Chronic ischemic stroke severity level 1                            |
| Chronic ischemic stroke severity level 2                            |
| Chronic ischemic stroke severity level 3                            |
| Chronic ischemic stroke severity level 4                            |
| Chronic ischemic stroke severity level 5                            |
| Hemorrhagic stroke                                                  |
| Acute hemorrhagic stroke severity level 1                           |
| Acute hemorrhagic stroke severity level 2                           |
| Acute hemorrhagic stroke severity level 3                           |
| Acute hemorrhagic stroke severity level 4                           |
| Acute hemorrhagic stroke severity level 5                           |
| Asymptomatic chronic hemorrhagic stroke                             |
| Chronic hemorrhagic stroke severity level 1                         |
| Chronic hemorrhagic stroke severity level 2                         |

|                                                                          |
|--------------------------------------------------------------------------|
| Chronic hemorrhagic stroke severity level 3                              |
| Chronic hemorrhagic stroke severity level 4                              |
| Chronic hemorrhagic stroke severity level 5                              |
| Hypertensive heart disease                                               |
| Asymptomatic and mild heart failure due to hypertensive heart disease    |
| Moderate heart failure due to hypertensive heart disease                 |
| Severe heart failure due to hypertensive heart disease                   |
| Cardiomyopathy and myocarditis                                           |
| Myocarditis                                                              |
| Acute myocarditis                                                        |
| Asymptomatic and mild heart failure due to myocarditis                   |
| Moderate heart failure due to myocarditis                                |
| Severe heart failure due to myocarditis                                  |
| Alcoholic cardiomyopathy                                                 |
| Asymptomatic and mild heart failure due to alcoholic cardiomyopathy      |
| Moderate heart failure due to alcoholic cardiomyopathy                   |
| Severe heart failure due to alcoholic cardiomyopathy                     |
| Other cardiomyopathy                                                     |
| Asymptomatic and mild heart failure due to other cardiomyopathy          |
| Moderate heart failure due to other cardiomyopathy                       |
| Severe heart failure due to other cardiomyopathy                         |
| Atrial fibrillation and flutter                                          |
| Asymptomatic atrial fibrillation and flutter                             |
| Symptomatic atrial fibrillation and flutter                              |
| Aortic aneurysm                                                          |
| Peripheral artery disease                                                |
| Asymptomatic peripheral vascular disease                                 |
| Symptomatic claudication due to peripheral vascular disease              |
| Endocarditis                                                             |
| Asymptomatic and mild heart failure due to endocarditis                  |
| Moderate endocarditis                                                    |
| Moderate heart failure due to endocarditis                               |
| Severe endocarditis                                                      |
| Severe heart failure due to endocarditis                                 |
| Other cardiovascular and circulatory diseases                            |
| Asymptomatic and mild heart failure due to other cardiovascular diseases |
| Asymptomatic other cardiovascular diseases                               |
| Mild other cardiovascular diseases                                       |
| Moderate heart failure due to other cardiovascular diseases              |
| Moderate other cardiovascular diseases                                   |
| Severe heart failure due to other cardiovascular diseases                |
| Severe other cardiovascular diseases                                     |
| Chronic respiratory diseases                                             |

|                                                                                         |
|-----------------------------------------------------------------------------------------|
| Chronic obstructive pulmonary disease                                                   |
| Asymptomatic and mild heart failure due to severe chronic obstructive pulmonary disease |
| Asymptomatic chronic obstructive pulmonary disease                                      |
| Mild chronic obstructive pulmonary disease                                              |
| Moderate chronic obstructive pulmonary disease                                          |
| Moderate heart failure due to severe chronic obstructive pulmonary disease              |
| Severe chronic obstructive pulmonary disease without heart failure                      |
| Severe heart failure due to severe chronic obstructive pulmonary disease                |
| Pneumoconiosis                                                                          |
| Silicosis                                                                               |
| Asymptomatic and mild heart failure due to severe silicosis                             |
| Asymptomatic silicosis                                                                  |
| Mild silicosis                                                                          |
| Moderate heart failure due to severe silicosis                                          |
| Moderate silicosis                                                                      |
| Severe heart failure due to severe silicosis                                            |
| Severe silicosis without heart failure                                                  |
| Asbestosis                                                                              |
| Asymptomatic and mild heart failure due to severe asbestosis                            |
| Asymptomatic asbestosis                                                                 |
| Mild asbestosis                                                                         |
| Moderate asbestosis                                                                     |
| Moderate heart failure due to severe asbestosis                                         |
| Severe asbestosis without heart failure                                                 |
| Severe heart failure due to severe asbestosis                                           |
| Coal workers pneumoconiosis                                                             |
| Asymptomatic and mild heart failure due to severe coal workers pneumoconiosis           |
| Asymptomatic coal workers pneumoconiosis                                                |
| Mild coal workers pneumoconiosis                                                        |
| Moderate coal workers pneumoconiosis                                                    |
| Moderate heart failure due to severe coal workers pneumoconiosis                        |
| Severe coal workers pneumoconiosis without heart failure                                |
| Severe heart failure due to severe coal workers pneumoconiosis                          |
| Other pneumoconiosis                                                                    |
| Asymptomatic and mild heart failure due to severe other pneumoconiosis                  |
| Asymptomatic other pneumoconiosis                                                       |
| Mild other pneumoconiosis                                                               |
| Moderate heart failure due to severe other pneumoconiosis                               |
| Moderate other pneumoconiosis                                                           |
| Severe heart failure due to severe other pneumoconiosis                                 |
| Severe other pneumoconiosis without heart failure                                       |
| Asthma                                                                                  |
| Asymptomatic asthma                                                                     |

|                                                                                                       |
|-------------------------------------------------------------------------------------------------------|
| Controlled asthma                                                                                     |
| Partially controlled asthma                                                                           |
| Uncontrolled asthma                                                                                   |
| Interstitial lung disease and pulmonary sarcoidosis                                                   |
| Asymptomatic and mild heart failure due to severe interstitial lung disease and pulmonary sarcoidosis |
| Asymptomatic interstitial lung disease and pulmonary sarcoidosis                                      |
| Mild interstitial lung disease and pulmonary sarcoidosis                                              |
| Moderate heart failure due to severe interstitial lung disease and pulmonary sarcoidosis              |
| Moderate interstitial lung disease and pulmonary sarcoidosis                                          |
| Severe heart failure due to severe interstitial lung disease and pulmonary sarcoidosis                |
| Severe interstitial lung disease and pulmonary sarcoidosis without heart failure                      |
| Other chronic respiratory diseases                                                                    |
| Cirrhosis and other chronic liver diseases                                                            |
| Cirrhosis and other chronic liver diseases due to hepatitis B                                         |
| Cirrhosis and other chronic liver diseases due to hepatitis B, compensated                            |
| Cirrhosis and other chronic liver diseases due to hepatitis B, decompensated                          |
| Cirrhosis and other chronic liver diseases due to hepatitis C                                         |
| Cirrhosis and other chronic liver diseases due to hepatitis C, compensated                            |
| Cirrhosis and other chronic liver diseases due to hepatitis C, decompensated                          |
| Cirrhosis and other chronic liver diseases due to alcohol use                                         |
| Cirrhosis and other chronic liver diseases due to alcohol, compensated                                |
| Cirrhosis and other chronic liver diseases due to alcohol, decompensated                              |
| Cirrhosis and other chronic liver diseases due to other causes                                        |
| Cirrhosis and other chronic liver diseases due to other cause, compensated                            |
| Cirrhosis and other chronic liver diseases due to other cause, decompensated                          |
| Digestive diseases                                                                                    |
| Peptic ulcer disease                                                                                  |
| Asymptomatic peptic ulcer disease with mild anemia                                                    |
| Asymptomatic peptic ulcer disease with moderate anemia                                                |
| Asymptomatic peptic ulcer disease with severe anemia                                                  |
| Asymptomatic peptic ulcer disease without anemia                                                      |
| Mild anemia due to peptic ulcer disease                                                               |
| Mild symptomatic peptic ulcer disease with mild anemia                                                |
| Mild symptomatic peptic ulcer disease with moderate anemia                                            |
| Mild symptomatic peptic ulcer disease with severe anemia                                              |
| Mild symptomatic peptic ulcer disease without anemia                                                  |
| Moderate anemia due to peptic ulcer disease                                                           |
| Moderate symptomatic peptic ulcer disease with mild anemia                                            |
| Moderate symptomatic peptic ulcer disease with moderate anemia                                        |
| Moderate symptomatic peptic ulcer disease with severe anemia                                          |
| Moderate symptomatic peptic ulcer disease without anemia                                              |
| Severe anemia due to peptic ulcer disease                                                             |
| Gastritis and duodenitis                                                                              |

|                                                                    |
|--------------------------------------------------------------------|
| Asymptomatic gastritis and duodenitis with mild anemia             |
| Asymptomatic gastritis and duodenitis with moderate anemia         |
| Asymptomatic gastritis and duodenitis with severe anemia           |
| Asymptomatic gastritis and duodenitis without anemia               |
| Mild anemia due to gastritis and duodenitis                        |
| Mild symptomatic gastritis and duodenitis with mild anemia         |
| Mild symptomatic gastritis and duodenitis with moderate anemia     |
| Mild symptomatic gastritis and duodenitis with severe anemia       |
| Mild symptomatic gastritis and duodenitis without anemia           |
| Moderate anemia due to gastritis and duodenitis                    |
| Moderate symptomatic gastritis and duodenitis with mild anemia     |
| Moderate symptomatic gastritis and duodenitis with moderate anemia |
| Moderate symptomatic gastritis and duodenitis with severe anemia   |
| Moderate symptomatic gastritis and duodenitis without anemia       |
| Severe anemia due to gastritis and duodenitis                      |
| Appendicitis                                                       |
| Paralytic ileus and intestinal obstruction                         |
| Inguinal, femoral, and abdominal hernia                            |
| Asymptomatic inguinal, femoral, and abdominal hernia               |
| Mild symptomatic inguinal, femoral and abdominal hernia            |
| Moderate symptomatic inguinal, femoral and abdominal hernia        |
| Severe symptomatic inguinal, femoral and abdominal hernia          |
| Inflammatory bowel disease                                         |
| Asymptomatic Crohn's disease                                       |
| Asymptomatic ulcerative colitis                                    |
| Crohn's disease                                                    |
| Ulcerative colitis                                                 |
| Vascular intestinal disorders                                      |
| Gallbladder and biliary diseases                                   |
| Asymptomatic gallbladder and biliary diseases                      |
| Mild symptomatic episodes gallbladder and biliary diseases         |
| Moderate symptomatic episodes gallbladder and biliary diseases     |
| Severe symptomatic episodes gallbladder and biliary diseases       |
| Pancreatitis                                                       |
| Mild pancreatitis episodes                                         |
| Moderate pancreatitis episodes                                     |
| Severe pancreatitis episodes                                       |
| Other digestive diseases                                           |
| Neurological disorders                                             |
| Alzheimer disease and other dementias                              |
| Mild Alzheimer disease and other dementias                         |
| Moderate Alzheimer disease and other dementias                     |
| Severe Alzheimer disease and other dementias                       |

|                                                                                                           |
|-----------------------------------------------------------------------------------------------------------|
| Parkinson disease                                                                                         |
| Mild Parkinson disease                                                                                    |
| Moderate Parkinson disease                                                                                |
| Severe Parkinson disease                                                                                  |
| Epilepsy                                                                                                  |
| Less severe epilepsy                                                                                      |
| Seizure-free, treated epilepsy                                                                            |
| Severe epilepsy                                                                                           |
| Multiple sclerosis                                                                                        |
| Asymptomatic multiple sclerosis                                                                           |
| Mild multiple sclerosis                                                                                   |
| Moderate multiple sclerosis                                                                               |
| Severe multiple sclerosis                                                                                 |
| Motor neuron disease                                                                                      |
| Diagnosis of motor neuron disease                                                                         |
| Mild motor impairment and mild respiratory problems due to motor neuron disease                           |
| Mild motor impairment and severe respiratory problems due to motor neuron disease                         |
| Mild motor impairment and speech problems due to motor neuron disease                                     |
| Mild motor impairment due to motor neuron disease                                                         |
| Mild motor impairment, mild respiratory problems, and speech problems due to motor neuron disease         |
| Mild motor impairment, moderate respiratory problems, and speech problems due to motor neuron disease     |
| Mild motor impairment, severe respiratory problems and speech problems due to motor neuron disease        |
| Mild respiratory problems and speech problems due to motor neuron disease                                 |
| Mild respiratory problems due to motor neuron disease                                                     |
| Moderate motor impairment and mild respiratory problems due to motor neuron disease                       |
| Moderate motor impairment and moderate respiratory problems due to motor neuron disease                   |
| Moderate motor impairment and severe respiratory problems due to motor neuron disease                     |
| Moderate motor impairment and speech problems due to motor neuron disease                                 |
| Moderate motor impairment due to motor neuron disease                                                     |
| Moderate motor impairment, mild respiratory problems, and speech problems due to motor neuron disease     |
| Moderate motor impairment, moderate respiratory problems, and speech problems due to motor neuron disease |
| Moderate motor impairment, severe respiratory problems, and speech problems due to motor neuron disease   |
| Moderate respiratory problems and speech problems due to motor neuron disease                             |
| Moderate respiratory problems due to motor neuron disease                                                 |
| Severe motor impairment and mild respiratory problems due to motor neuron disease                         |
| Severe motor impairment and moderate respiratory problems due to motor neuron disease                     |
| Severe motor impairment and severe respiratory problems due to motor neuron disease                       |
| Severe motor impairment and speech problems due to motor neuron disease                                   |
| Severe motor impairment due to motor neuron disease                                                       |
| Severe motor impairment, mild respiratory problems, and speech problems due to motor neuron disease       |
| Severe motor impairment, moderate respiratory problems, and speech problems due to motor neuron disease   |
| Severe motor impairment, severe respiratory problems, and speech problems due to motor neuron disease     |
| Severe respiratory problems and speech problems due to motor neuron disease                               |

|                                                                       |
|-----------------------------------------------------------------------|
| Severe respiratory problems due to motor neuron disease               |
| Speech problems due to motor neuron disease                           |
| Migraine                                                              |
| Asymptomatic medication overuse headache due to migraine              |
| Asymptomatic migraine                                                 |
| Symptomatic medication overuse headache due to migraine               |
| Symptomatic migraine                                                  |
| Tension-type headache                                                 |
| Asymptomatic medication overuse headache due to tension-type headache |
| Asymptomatic tension-type headache                                    |
| Symptomatic medication overuse headache due to tension-type headache  |
| Symptomatic tension-type headache                                     |
| Other neurological disorders                                          |
| Guillain-Barré syndrome due to other neurological disorders           |
| Mental and substance use disorders                                    |
| Schizophrenia                                                         |
| Schizophrenia acute state                                             |
| Schizophrenia residual state                                          |
| Alcohol use disorders                                                 |
| Asymptomatic alcohol dependence                                       |
| Asymptomatic fetal alcohol syndrome                                   |
| Mild alcohol dependence                                               |
| Mild fetal alcohol syndrome                                           |
| Moderate alcohol dependence                                           |
| Moderate fetal alcohol syndrome                                       |
| Severe alcohol dependence                                             |
| Severe fetal alcohol syndrome                                         |
| Very mild alcohol dependence                                          |
| Drug use disorders                                                    |
| Opioid use disorders                                                  |
| Asymptomatic opioid dependence                                        |
| Mild opioid dependence                                                |
| Severe opioid dependence                                              |
| Cocaine use disorders                                                 |
| Asymptomatic cocaine dependence                                       |
| Mild cocaine dependence                                               |
| Severe cocaine dependence                                             |
| Amphetamine use disorders                                             |
| Asymptomatic amphetamine dependence                                   |
| Mild amphetamine dependence                                           |
| Severe amphetamine dependence                                         |
| Cannabis use disorders                                                |
| Asymptomatic cannabis dependence                                      |



|                                                                      |
|----------------------------------------------------------------------|
| Mild cannabis dependence                                             |
| Severe cannabis dependence                                           |
| Other drug use disorders                                             |
| Depressive disorders                                                 |
| Major depressive disorder                                            |
| Major depressive disorder, currently without symptoms                |
| Mild major depressive disorder                                       |
| Moderate major depressive disorder                                   |
| Severe major depressive disorder                                     |
| Dysthymia                                                            |
| Dysthymia, currently without symptoms                                |
| Symptomatic dysthymia                                                |
| Bipolar disorder                                                     |
| Bipolar disorder depressive state                                    |
| Bipolar disorder manic state                                         |
| Bipolar disorder residual state                                      |
| Anxiety disorders                                                    |
| Anxiety disorders, currently without symptoms                        |
| Mild anxiety disorders                                               |
| Moderate anxiety disorders                                           |
| Severe anxiety disorders                                             |
| Eating disorders                                                     |
| Anorexia nervosa                                                     |
| Bulimia nervosa                                                      |
| Autistic spectrum disorders                                          |
| Autism                                                               |
| Autism with borderline intellectual disability                       |
| Autism with mild intellectual disability                             |
| Autism with moderate intellectual disability                         |
| Autism with profound intellectual disability                         |
| Autism with severe intellectual disability                           |
| Autism without intellectual disability                               |
| Asperger syndrome and other autistic spectrum disorders              |
| Attention-deficit/hyperactivity disorder                             |
| Attention-deficit/hyperactivity disorder, currently without symptoms |
| Symptomatic attention-deficit/hyperactivity disorder                 |
| Conduct disorder                                                     |
| Conduct disorder, currently without symptoms                         |
| Symptomatic conduct disorder                                         |
| Idiopathic developmental intellectual disability                     |
| Borderline idiopathic developmental intellectual disability          |
| Mild idiopathic developmental intellectual disability                |
| Moderate idiopathic developmental intellectual disability            |

|                                                                                        |
|----------------------------------------------------------------------------------------|
| Profound idiopathic developmental intellectual disability                              |
| Severe idiopathic developmental intellectual disability                                |
| Other mental and substance use disorders                                               |
| Mild other mental disorders                                                            |
| Moderate other mental disorders                                                        |
| Other mental disorders, currently without symptoms                                     |
| Severe other mental disorders                                                          |
| Diabetes, urogenital, blood, and endocrine diseases                                    |
| Diabetes mellitus                                                                      |
| Blindness due to diabetes mellitus                                                     |
| Diabetic foot due to neuropathy                                                        |
| Diabetic neuropathy                                                                    |
| Diabetic neuropathy and amputation with treatment                                      |
| Diabetic neuropathy and amputation without treatment                                   |
| Moderate vision impairment due to diabetes mellitus                                    |
| Severe vision impairment due to diabetes mellitus                                      |
| Uncomplicated diabetes mellitus                                                        |
| Acute glomerulonephritis                                                               |
| Chronic kidney disease                                                                 |
| Chronic kidney disease due to diabetes mellitus                                        |
| End-stage renal disease after transplant due to diabetes mellitus                      |
| End-stage renal disease on dialysis due to diabetes mellitus                           |
| Stage III chronic kidney disease and mild anemia due to diabetes mellitus              |
| Stage III chronic kidney disease and moderate anemia due to diabetes mellitus          |
| Stage III chronic kidney disease and severe anemia due to diabetes mellitus            |
| Stage III chronic kidney disease without anemia due to diabetes mellitus               |
| Stage IV chronic kidney disease untreated and mild anemia due to diabetes mellitus     |
| Stage IV chronic kidney disease untreated and moderate anemia due to diabetes mellitus |
| Stage IV chronic kidney disease untreated and severe anemia due to diabetes mellitus   |
| Stage IV chronic kidney disease untreated without anemia due to diabetes mellitus      |
| Stage V chronic kidney disease untreated and mild anemia due to diabetes mellitus      |
| Stage V chronic kidney disease untreated and moderate anemia due to diabetes mellitus  |
| Stage V chronic kidney disease untreated and severe anemia due to diabetes mellitus    |
| Stage V chronic kidney disease untreated without anemia due to diabetes mellitus       |
| Chronic kidney disease due to hypertension                                             |
| End-stage renal disease after transplant due to hypertension                           |
| End-stage renal disease on dialysis due to hypertension                                |
| Stage III chronic kidney disease and mild anemia due to hypertension                   |
| Stage III chronic kidney disease and moderate anemia due to hypertension               |
| Stage III chronic kidney disease and severe anemia due to hypertension                 |
| Stage III chronic kidney disease without anemia due to hypertension                    |
| Stage IV chronic kidney disease untreated and mild anemia due to hypertension          |
| Stage IV chronic kidney disease untreated and moderate anemia due to hypertension      |

|                                                                                         |
|-----------------------------------------------------------------------------------------|
| Stage IV chronic kidney disease untreated and severe anemia due to hypertension         |
| Stage IV chronic kidney disease untreated without anemia due to hypertension            |
| Stage V chronic kidney disease untreated and mild anemia due to hypertension            |
| Stage V chronic kidney disease untreated and moderate anemia due to hypertension        |
| Stage V chronic kidney disease untreated and severe anemia due to hypertension          |
| Stage V chronic kidney disease untreated without anemia due to hypertension             |
| Chronic kidney disease due to glomerulonephritis                                        |
| End-stage renal disease after transplant due to glomerulonephritis                      |
| End-stage renal disease on dialysis due to glomerulonephritis                           |
| Stage III chronic kidney disease and mild anemia due to glomerulonephritis              |
| Stage III chronic kidney disease and moderate anemia due to glomerulonephritis          |
| Stage III chronic kidney disease and severe anemia due to glomerulonephritis            |
| Stage III chronic kidney disease without anemia due to glomerulonephritis               |
| Stage IV chronic kidney disease untreated and mild anemia due to glomerulonephritis     |
| Stage IV chronic kidney disease untreated and moderate anemia due to glomerulonephritis |
| Stage IV chronic kidney disease untreated and severe anemia due to glomerulonephritis   |
| Stage IV chronic kidney disease untreated without anemia due to glomerulonephritis      |
| Stage V chronic kidney disease untreated and mild anemia due to glomerulonephritis      |
| Stage V chronic kidney disease untreated and moderate anemia due to glomerulonephritis  |
| Stage V chronic kidney disease untreated and severe anemia due to glomerulonephritis    |
| Stage V chronic kidney disease untreated without anemia due to glomerulonephritis       |
| Chronic kidney disease due to other causes                                              |
| End-stage renal disease after transplant due to other causes                            |
| End-stage renal disease on dialysis due to other causes                                 |
| Stage III chronic kidney disease and mild anemia due to other causes                    |
| Stage III chronic kidney disease and moderate anemia due to other causes                |
| Stage III chronic kidney disease and severe anemia due to other causes                  |
| Stage III chronic kidney disease without anemia due to other causes                     |
| Stage IV chronic kidney disease untreated and mild anemia due to other causes           |
| Stage IV chronic kidney disease untreated and moderate anemia due to other causes       |
| Stage IV chronic kidney disease untreated and severe anemia due to other causes         |
| Stage IV chronic kidney disease untreated without anemia due to other causes            |
| Stage V chronic kidney disease untreated and mild anemia due to other causes            |
| Stage V chronic kidney disease untreated and moderate anemia due to other causes        |
| Stage V chronic kidney disease untreated and severe anemia due to other causes          |
| Stage V chronic kidney disease untreated without anemia due to other causes             |
| Urinary diseases and male infertility                                                   |
| Interstitial nephritis and urinary tract infections                                     |
| Mild interstitial nephritis and urinary tract infections                                |
| Moderate interstitial nephritis and urinary tract infections                            |
| Urolithiasis                                                                            |
| Mild urolithiasis episodes                                                              |
| Moderate urolithiasis episodes                                                          |

|                                                                        |
|------------------------------------------------------------------------|
| Severe urolithiasis episodes                                           |
| Benign prostatic hyperplasia                                           |
| Asymptomatic benign prostatic hyperplasia                              |
| Symptomatic benign prostatic hyperplasia                               |
| Male infertility                                                       |
| Primary male infertility                                               |
| Secondary male infertility                                             |
| Other urinary diseases                                                 |
| Gynecological diseases                                                 |
| Uterine fibroids                                                       |
| Asymptomatic uterine fibroids                                          |
| Mild abdominal pain due to uterine fibroids, with mild anemia          |
| Mild abdominal pain due to uterine fibroids, with moderate anemia      |
| Mild abdominal pain due to uterine fibroids, with severe anemia        |
| Mild abdominal pain due to uterine fibroids, without anemia            |
| Polycystic ovarian syndrome                                            |
| Asymptomatic polycystic ovarian syndrome                               |
| Hirsutism and primary infertility due to polycystic ovarian syndrome   |
| Hirsutism and secondary infertility due to polycystic ovarian syndrome |
| Hirsutism due to polycystic ovarian syndrome                           |
| Primary infertility due to polycystic ovarian syndrome                 |
| Secondary infertility due to polycystic ovarian syndrome               |
| Female infertility                                                     |
| Idiopathic primary female infertility                                  |
| Idiopathic secondary female infertility                                |
| Endometriosis                                                          |
| Asymptomatic endometriosis                                             |
| Mild abdominal pain and primary infertility due to endometriosis       |
| Mild abdominal pain and secondary infertility due to endometriosis     |
| Mild abdominal pain due to endometriosis                               |
| Moderate abdominal pain and primary infertility due to endometriosis   |
| Moderate abdominal pain and secondary infertility due to endometriosis |
| Moderate abdominal pain due to endometriosis                           |
| Primary infertility due to endometriosis                               |
| Secondary infertility due to endometriosis                             |
| Severe abdominal pain and primary infertility due to endometriosis     |
| Severe abdominal pain and secondary infertility due to endometriosis   |
| Severe endometriosis                                                   |
| Genital prolapse                                                       |
| Abdominal pain and stress incontinence due to genital prolapse         |
| Abdominal pain due to genital prolapse                                 |
| Asymptomatic genital prolapse                                          |
| Stress incontinence due to genital prolapse                            |

|                                                                    |
|--------------------------------------------------------------------|
| Premenstrual syndrome                                              |
| Abdominal pain and depression due to premenstrual syndrome         |
| Abdominal pain due to premenstrual syndrome                        |
| Asymptomatic premenstrual syndrome                                 |
| Depression due to premenstrual syndrome                            |
| Other gynecological diseases                                       |
| Asymptomatic other gynecological disorders                         |
| Mild anemia due to other gynecological diseases                    |
| Mild other gynecological disorders                                 |
| Moderate anemia due to other gynecological diseases                |
| Moderate other gynecological disorders                             |
| Severe anemia due to other gynecological diseases                  |
| Severe other gynecological disorders                               |
| Hemoglobinopathies and hemolytic anemias                           |
| Thalassemias                                                       |
| Asymptomatic and mild heart failure due to thalassemias            |
| Beta-thalassemia major, severe infection with severe anemia        |
| Beta-thalassemia major, with mild anemia                           |
| Beta-thalassemia major, with moderate anemia                       |
| Beta-thalassemia major, with severe anemia                         |
| Beta-thalassemia major, without anemia                             |
| Hemoglobin E/Beta-thalassemia, without anemia                      |
| Hemoglobin E/beta-thalassemia, severe infection with severe anemia |
| Hemoglobin E/beta-thalassemia, with mild anemia                    |
| Hemoglobin E/beta-thalassemia, with moderate anemia                |
| Hemoglobin E/beta-thalassemia, with severe anemia                  |
| Hemoglobin H disease, severe infection with severe anemia          |
| Hemoglobin H disease, with mild anemia                             |
| Hemoglobin H disease, with moderate anemia                         |
| Hemoglobin H disease, with severe anemia                           |
| Hemoglobin H disease, without anemia                               |
| Moderate heart failure due to thalassemias                         |
| Severe heart failure due to thalassemias                           |
| Thalassemias trait                                                 |
| Asymptomatic B-thalassemia trait                                   |
| Asymptomatic hemoglobin E trait                                    |
| Mild anemia due to B-thalassemia trait                             |
| Mild anemia due to hemoglobin E trait                              |
| Moderate anemia due to B-thalassemia trait                         |
| Moderate anemia due to hemoglobin E trait                          |
| Severe anemia due to B-thalassemia trait                           |
| Severe anemia due to hemoglobin E trait                            |
| Sickle cell disorders                                              |

|                                                                                                                       |
|-----------------------------------------------------------------------------------------------------------------------|
| Hemoglobin SC disease, with mild anemia                                                                               |
| Hemoglobin SC disease, with moderate anemia                                                                           |
| Hemoglobin SC disease, with severe anemia                                                                             |
| Hemoglobin SC disease, with stroke and severe anemia                                                                  |
| Hemoglobin SC disease, with stroke, without anemia                                                                    |
| Hemoglobin SC disease, with vaso-occlusive crisis and severe anemia                                                   |
| Hemoglobin SC disease, with vaso-occlusive crisis and stroke, without anemia                                          |
| Hemoglobin SC disease, with vaso-occlusive crisis, stroke, and severe anemia                                          |
| Hemoglobin SC disease, with vaso-occlusive crisis, without anemia                                                     |
| Hemoglobin SC disease, without anemia                                                                                 |
| Homozygous sickle cell and severe sickle cell/beta-thalassemia, with mild anemia                                      |
| Homozygous sickle cell and severe sickle cell/beta-thalassemia, with moderate anemia                                  |
| Homozygous sickle cell and severe sickle cell/beta-thalassemia, with severe anemia                                    |
| Homozygous sickle cell and severe sickle cell/beta-thalassemia, with stroke and severe anemia                         |
| Homozygous sickle cell and severe sickle cell/beta-thalassemia, with stroke, without anemia                           |
| Homozygous sickle cell and severe sickle cell/beta-thalassemia, with vaso-occlusive crisis and severe anemia          |
| Homozygous sickle cell and severe sickle cell/beta-thalassemia, with vaso-occlusive crisis and stroke, without anemia |
| Homozygous sickle cell and severe sickle cell/beta-thalassemia, with vaso-occlusive crisis, stroke, and severe anemia |
| Homozygous sickle cell and severe sickle cell/beta-thalassemia, with vaso-occlusive crisis, without anemia            |
| Homozygous sickle cell and severe sickle cell/beta-thalassemia, without anemia                                        |
| Mild sickle cell/beta-thalassemia, with mild anemia                                                                   |
| Mild sickle cell/beta-thalassemia, with moderate anemia                                                               |
| Mild sickle cell/beta-thalassemia, with severe anemia                                                                 |
| Mild sickle cell/beta-thalassemia, with stroke and severe anemia                                                      |
| Mild sickle cell/beta-thalassemia, with stroke, without anemia                                                        |
| Mild sickle cell/beta-thalassemia, with vaso-occlusive crisis and severe anemia                                       |
| Mild sickle cell/beta-thalassemia, with vaso-occlusive crisis and stroke, without anemia                              |
| Mild sickle cell/beta-thalassemia, with vaso-occlusive crisis, stroke, and severe anemia                              |
| Mild sickle cell/beta-thalassemia, with vaso-occlusive crisis, without anemia                                         |
| Mild sickle cell/beta-thalassemia, without anemia                                                                     |
| Sickle cell trait                                                                                                     |
| Asymptomatic sickle cell trait                                                                                        |
| Mild anemia due to sickle cell trait                                                                                  |
| Moderate anemia due to sickle cell trait                                                                              |
| Severe anemia due to sickle cell trait                                                                                |
| G6PD deficiency                                                                                                       |
| Asymptomatic G6PD deficiency                                                                                          |
| Asymptomatic and mild heart failure due to G6PD deficiency                                                            |
| Mild anemia due to G6PD deficiency                                                                                    |
| Moderate anemia due to G6PD deficiency                                                                                |
| Moderate heart failure due to G6PD deficiency                                                                         |
| Severe anemia due to G6PD deficiency                                                                                  |

|                                                                                              |
|----------------------------------------------------------------------------------------------|
| Severe heart failure due to G6PD deficiency                                                  |
| G6PD trait                                                                                   |
| Asymptomatic hemizygous G6PD deficiency                                                      |
| Mild anemia due to hemizygous G6PD deficiency                                                |
| Moderate anemia due to hemizygous G6PD deficiency                                            |
| Severe anemia due to hemizygous G6PD deficiency                                              |
| Other hemoglobinopathies and hemolytic anemias                                               |
| Asymptomatic and mild heart failure due to other hemoglobinopathies and hemolytic anemias    |
| Mild anemia due to other hemoglobinopathies and hemolytic anemias                            |
| Moderate anemia due to other hemoglobinopathies and hemolytic anemias                        |
| Moderate heart failure due to other hemoglobinopathies and hemolytic anemias                 |
| Severe anemia due to other hemoglobinopathies and hemolytic anemias                          |
| Severe heart failure due to other hemoglobinopathies and hemolytic anemias                   |
| Endocrine, metabolic, blood, and immune disorders                                            |
| Asymptomatic and mild heart failure due to endocrine, metabolic, blood, and immune disorders |
| Asymptomatic endocrine, metabolic, blood, and immune disorders                               |
| Mild anemia due to endocrine, metabolic, blood, and immune disorders                         |
| Mild endocrine, metabolic, blood, and immune disorders                                       |
| Moderate anemia due to endocrine, metabolic, blood, and immune disorders                     |
| Moderate endocrine, metabolic, blood, and immune disorders                                   |
| Moderate heart failure due to endocrine, metabolic, blood, and immune disorders              |
| Severe anemia due to endocrine, metabolic, blood, and immune disorders                       |
| Severe endocrine, metabolic, blood, and immune disorders                                     |
| Severe heart failure due to endocrine, metabolic, blood, and immune disorders                |
| Musculoskeletal disorders                                                                    |
| Rheumatoid arthritis                                                                         |
| Mild rheumatoid arthritis                                                                    |
| Moderate rheumatoid arthritis                                                                |
| Severe rheumatoid arthritis                                                                  |
| Osteoarthritis                                                                               |
| Mild osteoarthritis of the hip                                                               |
| Mild osteoarthritis of the knee                                                              |
| Moderate osteoarthritis of the hip                                                           |
| Moderate osteoarthritis of the knee                                                          |
| Severe osteoarthritis of the hip                                                             |
| Severe osteoarthritis of the knee                                                            |
| Low back and neck pain                                                                       |
| Low back pain                                                                                |
| Mild low back pain with leg pain                                                             |
| Mild low back pain without leg pain                                                          |
| Moderate low back pain with leg pain                                                         |
| Moderate low back pain without leg pain                                                      |
| Most severe low back pain with leg pain                                                      |

|                                                                                   |
|-----------------------------------------------------------------------------------|
| Most severe low back pain without leg pain                                        |
| Severe low back pain with leg pain                                                |
| Severe low back pain without leg pain                                             |
| Neck pain                                                                         |
| Mild neck pain                                                                    |
| Moderate neck pain                                                                |
| Most severe neck pain                                                             |
| Severe neck pain                                                                  |
| Gout                                                                              |
| Asymptomatic gout                                                                 |
| Polyarticular gout                                                                |
| Symptomatic episodes of gout                                                      |
| Other musculoskeletal disorders                                                   |
| Asymptomatic other musculoskeletal disorders                                      |
| Other musculoskeletal disorders severity level 1                                  |
| Other musculoskeletal disorders severity level 2                                  |
| Other musculoskeletal disorders severity level 3                                  |
| Other musculoskeletal disorders severity level 4                                  |
| Other musculoskeletal disorders severity level 5                                  |
| Other musculoskeletal disorders severity level 6                                  |
| Other non-communicable diseases                                                   |
| Congenital birth defects                                                          |
| Neural tube defects                                                               |
| Asymptomatic encephalocele following treatment                                    |
| Borderline intellectual disability and incontinence due to encephalocele          |
| Borderline intellectual disability due to encephalocele                           |
| Incontinence due to encephalocele                                                 |
| Mild intellectual disability and incontinence due to encephalocele                |
| Mild intellectual disability due to encephalocele                                 |
| Mild motor impairment and borderline intellectual disability due to encephalocele |
| Mild motor impairment and borderline intellectual disability due to spina bifida  |
| Mild motor impairment and incontinence due to encephalocele                       |
| Mild motor impairment and incontinence due to spina bifida                        |
| Mild motor impairment and mild intellectual disability due to encephalocele       |
| Mild motor impairment and mild intellectual disability due to spina bifida        |
| Mild motor impairment and moderate intellectual disability due to encephalocele   |
| Mild motor impairment and moderate intellectual disability due to spina bifida    |
| Mild motor impairment and profound intellectual disability due to encephalocele   |
| Mild motor impairment and profound intellectual disability due to spina bifida    |
| Mild motor impairment and severe intellectual disability due to encephalocele     |
| Mild motor impairment and severe intellectual disability due to spina bifida      |
| Mild motor impairment due to encephalocele                                        |
| Mild motor impairment due to spina bifida                                         |



|                                                                                                     |
|-----------------------------------------------------------------------------------------------------|
| Mild motor impairment, borderline intellectual disability and incontinence due to encephalocele     |
| Mild motor impairment, borderline intellectual disability and incontinence due to spina bifida      |
| Mild motor impairment, mild intellectual disability and incontinence due to encephalocele           |
| Mild motor impairment, mild intellectual disability and incontinence due to spina bifida            |
| Mild motor impairment, moderate intellectual disability and incontinence due to encephalocele       |
| Mild motor impairment, moderate intellectual disability and incontinence due to spina bifida        |
| Mild motor impairment, profound intellectual disability and incontinence due to encephalocele       |
| Mild motor impairment, profound intellectual disability and incontinence due to spina bifida        |
| Mild motor impairment, severe intellectual disability and incontinence due to encephalocele         |
| Mild motor impairment, severe intellectual disability and incontinence due to spina bifida          |
| Moderate intellectual disability and incontinence due to encephalocele                              |
| Moderate intellectual disability due to encephalocele                                               |
| Moderate motor impairment and borderline intellectual disability due to encephalocele               |
| Moderate motor impairment and borderline intellectual disability due to spina bifida                |
| Moderate motor impairment and incontinence due to encephalocele                                     |
| Moderate motor impairment and incontinence due to spina bifida                                      |
| Moderate motor impairment and mild intellectual disability due to encephalocele                     |
| Moderate motor impairment and mild intellectual disability due to spina bifida                      |
| Moderate motor impairment and moderate intellectual disability due to encephalocele                 |
| Moderate motor impairment and moderate intellectual disability due to spina bifida                  |
| Moderate motor impairment and profound intellectual disability due to encephalocele                 |
| Moderate motor impairment and profound intellectual disability due to spina bifida                  |
| Moderate motor impairment and severe intellectual disability due to encephalocele                   |
| Moderate motor impairment and severe intellectual disability due to spina bifida                    |
| Moderate motor impairment due to encephalocele                                                      |
| Moderate motor impairment due to spina bifida                                                       |
| Moderate motor impairment, borderline intellectual disability and incontinence due to encephalocele |
| Moderate motor impairment, borderline intellectual disability and incontinence due to spina bifida  |
| Moderate motor impairment, mild intellectual disability and incontinence due to encephalocele       |
| Moderate motor impairment, mild intellectual disability and incontinence due to spina bifida        |
| Moderate motor impairment, moderate intellectual disability and incontinence due to encephalocele   |
| Moderate motor impairment, moderate intellectual disability and incontinence due to spina bifida    |
| Moderate motor impairment, profound intellectual disability and incontinence due to encephalocele   |
| Moderate motor impairment, profound intellectual disability and incontinence due to spina bifida    |
| Moderate motor impairment, severe intellectual disability and incontinence due to encephalocele     |
| Moderate motor impairment, severe intellectual disability and incontinence due to spina bifida      |
| Profound intellectual disability and incontinence due to encephalocele                              |
| Profound intellectual disability due to encephalocele                                               |
| Severe intellectual disability and incontinence due to encephalocele                                |
| Severe intellectual disability due to encephalocele                                                 |
| Severe motor and cognitive impairment due to anencephaly                                            |
| Severe motor impairment and borderline intellectual disability due to encephalocele                 |
| Severe motor impairment and borderline intellectual disability due to spina bifida                  |

|                                                                                                                                                                                                      |
|------------------------------------------------------------------------------------------------------------------------------------------------------------------------------------------------------|
| Severe motor impairment and incontinence due to encephalocele                                                                                                                                        |
| Severe motor impairment and incontinence due to spina bifida                                                                                                                                         |
| Severe motor impairment and mild intellectual disability due to encephalocele                                                                                                                        |
| Severe motor impairment and mild intellectual disability due to spina bifida                                                                                                                         |
| Severe motor impairment and moderate intellectual disability due to encephalocele                                                                                                                    |
| Severe motor impairment and moderate intellectual disability due to spina bifida                                                                                                                     |
| Severe motor impairment and profound intellectual disability due to encephalocele                                                                                                                    |
| Severe motor impairment and profound intellectual disability due to spina bifida                                                                                                                     |
| Severe motor impairment and severe intellectual disability due to encephalocele                                                                                                                      |
| Severe motor impairment and severe intellectual disability due to spina bifida                                                                                                                       |
| Severe motor impairment due to encephalocele                                                                                                                                                         |
| Severe motor impairment due to spina bifida                                                                                                                                                          |
| Severe motor impairment, borderline intellectual disability and incontinence due to encephalocele                                                                                                    |
| Severe motor impairment, borderline intellectual disability and incontinence due to spina bifida                                                                                                     |
| Severe motor impairment, mild intellectual disability and incontinence due to encephalocele                                                                                                          |
| Severe motor impairment, mild intellectual disability and incontinence due to spina bifida                                                                                                           |
| Severe motor impairment, moderate intellectual disability and incontinence due to encephalocele                                                                                                      |
| Severe motor impairment, moderate intellectual disability and incontinence due to spina bifida                                                                                                       |
| Severe motor impairment, profound intellectual disability and incontinence due to encephalocele                                                                                                      |
| Severe motor impairment, severe intellectual disability and incontinence due to encephalocele                                                                                                        |
| Severe motor impairment, severe intellectual disability and incontinence due to spina bifida                                                                                                         |
| profound motor impairment, profound intellectual disability and incontinence due to spina bifida                                                                                                     |
| Congenital heart anomalies                                                                                                                                                                           |
| Asymptomatic ventricular septal defect and atrial septal defect                                                                                                                                      |
| Congenital heart disease and borderline intellectual disability without heart failure due to critical malformations of great vessels, congenital valvular heart disease and patent ductus arteriosus |
| Congenital heart disease and borderline intellectual disability without heart failure due to other congenital cardiovascular anomalies                                                               |
| Congenital heart disease and borderline intellectual disability without heart failure due to severe congenital heart anomalies excluding single ventricle heart defects                              |
| Congenital heart disease and borderline intellectual disability without heart failure due to single ventricle and single ventricle pathway heart defects                                             |
| Congenital heart disease and borderline intellectual disability without heart failure due to ventricular septal defect and atrial septal defect                                                      |
| Congenital heart disease and mild heart failure without intellectual disability due to critical malformations of great vessels, congenital valvular heart disease and patent ductus arteriosus       |
| Congenital heart disease and mild heart failure without intellectual disability due to severe congenital heart anomalies excluding single ventricle heart defects                                    |
| Congenital heart disease and mild heart failure without intellectual disability due to single ventricle and single ventricle pathway heart defects                                                   |
| Congenital heart disease and mild heart failure without intellectual disability due to ventricular septal defect and atrial septal defect                                                            |
| Congenital heart disease and mild intellectual disability without heart failure due to severe congenital heart anomalies excluding single ventricle heart defects                                    |
| Congenital heart disease and mild intellectual disability without heart failure due to single ventricle and single ventricle pathway heart defects                                                   |
| Congenital heart disease and mild intellectual disability without heart failure due to critical malformations of great vessels, congenital valvular heart disease and patent ductus arteriosus       |
| Congenital heart disease and mild intellectual disability without heart failure due to other congenital cardiovascular anomalies                                                                     |

|                                                                                                                                                                                                    |
|----------------------------------------------------------------------------------------------------------------------------------------------------------------------------------------------------|
| Congenital heart disease and mild intellectual disability without heart failure due to ventricular septal defect and atrial septal defect                                                          |
| Congenital heart disease and moderate heart failure without intellectual disability due to critical malformations of great vessels, congenital valvular heart disease and patent ductus arteriosus |
| Congenital heart disease and moderate heart failure without intellectual disability due to severe congenital heart anomalies excluding single ventricle heart defects                              |
| Congenital heart disease and moderate heart failure without intellectual disability due to single ventricle and single ventricle pathway heart defects                                             |
| Congenital heart disease and moderate heart failure without intellectual disability due to ventricular septal defect and atrial septal defect                                                      |
| Congenital heart disease and moderate intellectual disability without heart failure due to severe congenital heart anomalies excluding single ventricle heart defects                              |
| Congenital heart disease and moderate intellectual disability without heart failure due to single ventricle and single ventricle pathway heart defects                                             |
| Congenital heart disease and moderate intellectual disability without heart failure due to critical malformations of great vessels, congenital valvular heart disease and patent ductus arteriosus |
| Congenital heart disease and moderate intellectual disability without heart failure due to other congenital cardiovascular anomalies                                                               |
| Congenital heart disease and moderate intellectual disability without heart failure due to ventricular septal defect and atrial septal defect                                                      |
| Congenital heart disease and profound intellectual disability without heart failure due to critical malformations of great vessels, congenital valvular heart disease and patent ductus arteriosus |
| Congenital heart disease and profound intellectual disability without heart failure due to other congenital cardiovascular anomalies                                                               |
| Congenital heart disease and profound intellectual disability without heart failure due to severe congenital heart anomalies excluding single ventricle heart defects                              |
| Congenital heart disease and profound intellectual disability without heart failure due to single ventricle and single ventricle pathway heart defects                                             |
| Congenital heart disease and profound intellectual disability without heart failure due to ventricular septal defect and atrial septal defect                                                      |
| Congenital heart disease and severe heart failure without intellectual disability due to critical malformations of great vessels, congenital valvular heart disease and patent ductus arteriosus   |
| Congenital heart disease and severe heart failure without intellectual disability due to severe congenital heart anomalies excluding single ventricle heart defects                                |
| Congenital heart disease and severe heart failure without intellectual disability due to single ventricle and single ventricle pathway heart defects                                               |
| Congenital heart disease and severe heart failure without intellectual disability due to ventricular septal defect and atrial septal defect                                                        |
| Congenital heart disease and severe intellectual disability without heart failure due to severe congenital heart anomalies excluding single ventricle heart defects                                |
| Congenital heart disease and severe intellectual disability without heart failure due to critical malformations of great vessels, congenital valvular heart disease and patent ductus arteriosus   |
| Congenital heart disease and severe intellectual disability without heart failure due to other congenital cardiovascular anomalies                                                                 |
| Congenital heart disease and severe intellectual disability without heart failure due to single ventricle and single ventricle pathway heart defects                                               |
| Congenital heart disease and severe intellectual disability without heart failure due to ventricular septal defect and atrial septal defect                                                        |
| Congenital heart disease without heart failure or intellectual disability due to critical malformations of great vessels, congenital valvular heart disease and patent ductus arteriosus           |
| Congenital heart disease without heart failure or intellectual disability due to ventricular septal defect and atrial septal defect                                                                |
| Congenital heart disease without intellectual disability or heart failure due to other congenital cardiovascular anomalies                                                                         |
| Congenital heart disease without intellectual disability or heart failure due to severe congenital heart anomalies excluding single ventricle heart defects                                        |
| Congenital heart disease without intellectual disability or heart failure due to single ventricle and single ventricle pathway heart defects                                                       |
| Congenital heart disease, borderline intellectual disability and mild heart failure due to critical malformations of great vessels, congenital valvular heart disease and patent ductus arteriosus |





|                                                                                                          |
|----------------------------------------------------------------------------------------------------------|
| Asymptomatic orofacial clefts                                                                            |
| Disfigurement level 1 due to orofacial clefts                                                            |
| Disfigurement level 2 and speech problems due to orofacial clefts                                        |
| Disfigurement level 2 due to orofacial clefts                                                            |
| Down syndrome                                                                                            |
| Asymptomatic Down syndrome                                                                               |
| Borderline intellectual disability and mild dementia due to Down syndrome                                |
| Borderline intellectual disability and moderate dementia due to Down syndrome                            |
| Borderline intellectual disability and severe dementia due to Down syndrome                              |
| Borderline intellectual disability due to Down syndrome                                                  |
| Borderline intellectual disability with congenital heart disease due to Down syndrome                    |
| Borderline intellectual disability, mild dementia, and congenital heart disease due to Down syndrome     |
| Borderline intellectual disability, moderate dementia, and congenital heart disease due to Down syndrome |
| Borderline intellectual disability, severe dementia, and congenital heart disease due to Down syndrome   |
| Congenital heart disease and mild dementia due to Down syndrome                                          |
| Congenital heart disease and moderate dementia due to Down syndrome                                      |
| Congenital heart disease and severe dementia due to Down syndrome                                        |
| Isolated congenital heart disease due to Down syndrome                                                   |
| Mild dementia due to Down syndrome                                                                       |
| Mild intellectual disability and mild dementia due to Down syndrome                                      |
| Mild intellectual disability and moderate dementia due to Down syndrome                                  |
| Mild intellectual disability and severe dementia due to Down syndrome                                    |
| Mild intellectual disability due to Down syndrome                                                        |
| Mild intellectual disability with congenital heart disease due to Down syndrome                          |
| Mild intellectual disability, mild dementia, and congenital heart disease due to Down syndrome           |
| Mild intellectual disability, moderate dementia, and congenital heart disease due to Down syndrome       |
| Mild intellectual disability, severe dementia, and congenital heart disease due to Down syndrome         |
| Moderate dementia due to Down syndrome                                                                   |
| Moderate intellectual disability and mild dementia due to Down syndrome                                  |
| Moderate intellectual disability and moderate dementia due to Down syndrome                              |
| Moderate intellectual disability and severe dementia due to Down syndrome                                |
| Moderate intellectual disability due to Down syndrome                                                    |
| Moderate intellectual disability with congenital heart disease due to Down syndrome                      |
| Moderate intellectual disability, mild dementia, and congenital heart disease due to Down syndrome       |
| Moderate intellectual disability, moderate dementia, and congenital heart disease due to Down syndrome   |
| Moderate intellectual disability, severe dementia, and congenital heart disease due to Down syndrome     |
| Profound intellectual disability and mild dementia due to Down syndrome                                  |
| Profound intellectual disability and moderate dementia due to Down syndrome                              |
| Profound intellectual disability and severe dementia due to Down syndrome                                |
| Profound intellectual disability due to Down syndrome                                                    |
| Profound intellectual disability with congenital heart disease due to Down syndrome                      |
| Profound intellectual disability, mild dementia, and congenital heart disease due to Down syndrome       |
| Profound intellectual disability, moderate dementia, and congenital heart disease due to Down syndrome   |

|                                                                                                                            |
|----------------------------------------------------------------------------------------------------------------------------|
| Profound intellectual disability, severe dementia, and congenital heart disease due to Down syndrome                       |
| Severe dementia due to Down syndrome                                                                                       |
| Severe intellectual disability and mild dementia due to Down syndrome                                                      |
| Severe intellectual disability and moderate dementia due to Down syndrome                                                  |
| Severe intellectual disability and severe dementia due to Down syndrome                                                    |
| Severe intellectual disability due to Down syndrome                                                                        |
| Severe intellectual disability with congenital heart disease due to Down syndrome                                          |
| Severe intellectual disability, mild dementia, and congenital heart disease due to Down syndrome                           |
| Severe intellectual disability, moderate dementia, and congenital heart disease due to Down syndrome                       |
| Severe intellectual disability, severe dementia, and congenital heart disease due to Down syndrome                         |
| Turner syndrome                                                                                                            |
| Asymptomatic Turner syndrome                                                                                               |
| Congenital heart disease due to Turner syndrome                                                                            |
| Congenital heart disease with infertility due to Turner syndrome                                                           |
| Primary infertility due to Turner syndrome                                                                                 |
| Klinefelter syndrome                                                                                                       |
| Asymptomatic Klinefelter syndrome                                                                                          |
| Borderline intellectual disability due to Klinefelter syndrome                                                             |
| Borderline intellectual disability with infertility due to Klinefelter syndrome                                            |
| Mild intellectual disability due to Klinefelter syndrome                                                                   |
| Mild intellectual disability with infertility due to Klinefelter syndrome                                                  |
| Primary infertility due to Klinefelter syndrome                                                                            |
| Other chromosomal abnormalities                                                                                            |
| Asymptomatic other chromosomal abnormalities                                                                               |
| Borderline intellectual disability and mild dementia due to other chromosomal abnormalities                                |
| Borderline intellectual disability and moderate dementia due to other chromosomal abnormalities                            |
| Borderline intellectual disability and severe dementia due to other chromosomal abnormalities                              |
| Borderline intellectual disability due to other chromosomal abnormalities                                                  |
| Borderline intellectual disability with congenital heart disease due to other chromosomal abnormalities                    |
| Borderline intellectual disability, mild dementia, and congenital heart disease due to other chromosomal abnormalities     |
| Borderline intellectual disability, moderate dementia, and congenital heart disease due to other chromosomal abnormalities |
| Borderline intellectual disability, severe dementia, and congenital heart disease due to other chromosomal abnormalities   |
| Congenital heart disease and mild dementia due to other chromosomal abnormalities                                          |
| Congenital heart disease and moderate dementia due to other chromosomal abnormalities                                      |
| Congenital heart disease and severe dementia due to other chromosomal abnormalities                                        |
| Isolated congenital heart disease due to other chromosomal abnormalities                                                   |
| Mild dementia due to other chromosomal abnormalities                                                                       |
| Mild intellectual disability and mild dementia due to other chromosomal abnormalities                                      |
| Mild intellectual disability and moderate dementia due to other chromosomal abnormalities                                  |
| Mild intellectual disability and severe dementia due to other chromosomal abnormalities                                    |
| Mild intellectual disability due to other chromosomal abnormalities                                                        |

|                                                                                                                          |
|--------------------------------------------------------------------------------------------------------------------------|
| Mild intellectual disability with congenital heart disease due to other chromosomal abnormalities                        |
| Mild intellectual disability, mild dementia, and congenital heart disease due to other chromosomal abnormalities         |
| Mild intellectual disability, moderate dementia, and congenital heart disease due to other chromosomal abnormalities     |
| Mild intellectual disability, severe dementia, and congenital heart disease due to other chromosomal abnormalities       |
| Moderate dementia due to other chromosomal abnormalities                                                                 |
| Moderate intellectual disability and mild dementia due to other chromosomal abnormalities                                |
| Moderate intellectual disability and moderate dementia due to other chromosomal abnormalities                            |
| Moderate intellectual disability and severe dementia due to other chromosomal abnormalities                              |
| Moderate intellectual disability due to other chromosomal abnormalities                                                  |
| Moderate intellectual disability with congenital heart disease due to other chromosomal abnormalities                    |
| Moderate intellectual disability, mild dementia, and congenital heart disease due to other chromosomal abnormalities     |
| Moderate intellectual disability, moderate dementia, and congenital heart disease due to other chromosomal abnormalities |
| Moderate intellectual disability, severe dementia, and congenital heart disease due to other chromosomal abnormalities   |
| Profound intellectual disability and mild dementia due to other chromosomal abnormalities                                |
| Profound intellectual disability and moderate dementia due to other chromosomal abnormalities                            |
| Profound intellectual disability and severe dementia due to other chromosomal abnormalities                              |
| Profound intellectual disability due to other chromosomal abnormalities                                                  |
| Profound intellectual disability with congenital heart disease due to other chromosomal abnormalities                    |
| Profound intellectual disability, mild dementia, and congenital heart disease due to other chromosomal abnormalities     |
| Profound intellectual disability, moderate dementia, and congenital heart disease due to other chromosomal abnormalities |
| Profound intellectual disability, severe dementia, and congenital heart disease due to other chromosomal abnormalities   |
| Severe dementia due to other chromosomal abnormalities                                                                   |
| Severe intellectual disability and mild dementia due to other chromosomal abnormalities                                  |
| Severe intellectual disability and moderate dementia due to other chromosomal abnormalities                              |
| Severe intellectual disability and severe dementia due to other chromosomal abnormalities                                |
| Severe intellectual disability due to other chromosomal abnormalities                                                    |
| Severe intellectual disability with congenital heart disease due to other chromosomal abnormalities                      |
| Severe intellectual disability, mild dementia, and congenital heart disease due to other chromosomal abnormalities       |
| Severe intellectual disability, moderate dementia, and congenital heart disease due to other chromosomal abnormalities   |
| Severe intellectual disability, severe dementia, and congenital heart disease due to other chromosomal abnormalities     |
| Severe motor and cognitive impairment due to Edward Syndrome or Patau Syndrome                                           |
| Severe motor and cognitive impairment with congenital heart disease due to Edward Syndrome or Patau Syndrome             |
| Congenital musculoskeletal and limb anomalies                                                                            |
| Disfigurement level 1 due to polydactyly and syndactyly                                                                  |
| Disfigurement level 2 and mild motor impairment due to congenital limb deficiency                                        |
| Disfigurement level 2 and mild motor impairment due to other congenital musculoskeletal anomalies                        |
| Disfigurement level 2 and moderate motor impairment due to congenital limb deficiency                                    |
| Disfigurement level 2 and moderate motor impairment due to other congenital musculoskeletal anomalies                    |
| Disfigurement level 2 due to congenital limb deficiency                                                                  |
| Disfigurement level 2 due to other congenital musculoskeletal anomalies                                                  |



|                                                                                                                                                                              |
|------------------------------------------------------------------------------------------------------------------------------------------------------------------------------|
| Disfigurement level 2 with pain and mild motor impairment due to congenital limb deficiency                                                                                  |
| Disfigurement level 2 with pain and mild motor impairment due to other congenital musculoskeletal anomalies                                                                  |
| Disfigurement level 2 with pain and moderate motor impairment due to congenital limb deficiency                                                                              |
| Disfigurement level 2 with pain and moderate motor impairment due to other congenital musculoskeletal anomalies                                                              |
| Disfigurement level 2 with pain due to congenital limb deficiency                                                                                                            |
| Disfigurement level 2 with pain due to other congenital musculoskeletal anomalies                                                                                            |
| Urogenital congenital anomalies                                                                                                                                              |
| Asymptomatic congenital anomalies of the urinary tract                                                                                                                       |
| Asymptomatic congenital genital anomalies                                                                                                                                    |
| Atypical genital and recurrent urinary tract infections and other abdominal issues due to congenital anomalies of the urinary tract                                          |
| Atypical genital and recurrent urinary tract infections and other abdominal issues due to congenital genital anomalies                                                       |
| Atypical genitalia and impotence due to congenital anomalies of the urinary tract                                                                                            |
| Atypical genitalia and impotence due to congenital genital anomalies                                                                                                         |
| Atypical genitalia and incontinence due to congenital anomalies of the urinary tract                                                                                         |
| Atypical genitalia and primary infertility due to congenital genital anomalies                                                                                               |
| Atypical genitalia due to congenital anomalies of the urinary tract                                                                                                          |
| Atypical genitalia due to congenital genital anomalies                                                                                                                       |
| Atypical genitalia, incontinence and impotence due to congenital anomalies of the urinary tract                                                                              |
| Atypical genitalia, incontinence, impotence, and recurrent urinary tract infections or other abdominal issues and impotence due to congenital anomalies of the urinary tract |
| Atypical genitalia, infertility and impotence due to congenital genital anomalies                                                                                            |
| Atypical genitalia, infertility, impotence, and recurrent urinary tract infections or other abdominal issues and impotence due to congenital genital anomalies               |
| Atypical genitalia, recurrent urinary tract infections or other abdominal issues and impotence due to congenital anomalies of the urinary tract                              |
| Atypical genitalia, recurrent urinary tract infections or other abdominal issues and impotence due to congenital genital anomalies                                           |
| Atypical genitalia, recurrent urinary tract infections or other abdominal issues and incontinence due to congenital anomalies of the urinary tract                           |
| Atypical genitalia, recurrent urinary tract infections or other abdominal issues and infertility due to congenital genital anomalies                                         |
| Impotence and recurrent urinary tract infections or other abdominal issues due to congenital anomalies of the urinary tract                                                  |
| Impotence and recurrent urinary tract infections or other abdominal issues due to congenital genital anomalies                                                               |
| Impotence due to congenital anomalies of the urinary tract                                                                                                                   |
| Impotence due to congenital genital anomalies                                                                                                                                |
| Incontinence and impotence due to congenital anomalies of the urinary tract                                                                                                  |
| Incontinence and recurrent urinary tract infections or other abdominal issues due to congenital anomalies of the urinary tract                                               |
| Incontinence due to congenital anomalies of the urinary tract                                                                                                                |
| Incontinence, impotence, and recurrent urinary tract infections or other abdominal issues and impotence due to congenital anomalies of the urinary tract                     |
| Infertility and impotence due to congenital genital anomalies                                                                                                                |
| Infertility, impotence, and recurrent urinary tract infections or other abdominal issues and impotence due to congenital genital anomalies                                   |
| Primary infertility and recurrent urinary tract infections or other abdominal issues due to congenital genital anomalies                                                     |
| Primary infertility due to congenital genital anomalies                                                                                                                      |
| Recurrent urinary tract infections or other abdominal issues due to congenital anomalies of the urinary tract                                                                |

|                                                                                                                                                              |
|--------------------------------------------------------------------------------------------------------------------------------------------------------------|
| Recurrent urinary tract infections or other abdominal issues due to congenital genital anomalies                                                             |
| Digestive congenital anomalies                                                                                                                               |
| Mild chronic respiratory problems and developmental delay due to congenital diaphragmatic hernia                                                             |
| Acid reflux, dysphagia, and/or constipation due to other congenital malformations of the digestive tract                                                     |
| Asymptomatic congenital atresia and/or stenosis of the digestive tract                                                                                       |
| Asymptomatic congenital diaphragmatic hernia                                                                                                                 |
| Asymptomatic congenital malformations of the abdominal wall after treatment                                                                                  |
| Asymptomatic other congenital malformations of the digestive tract                                                                                           |
| Chronic abdominal pain and concern about scars due to congenital malformations of the abdominal wall                                                         |
| Chronic abdominal pain and developmental delay due to congenital diaphragmatic hernia                                                                        |
| Chronic abdominal pain and disfigurement due to congenital diaphragmatic hernia                                                                              |
| Chronic abdominal pain and mild chronic respiratory problems due to congenital diaphragmatic hernia                                                          |
| Chronic abdominal pain and/or nausea due to other congenital malformations of the digestive tract                                                            |
| Chronic abdominal pain and/or nausea with acid reflux, dysphagia, and/or constipation due to other congenital malformations of the digestive tract           |
| Chronic abdominal pain due to congenital atresia and/or stenosis of the digestive tract                                                                      |
| Chronic abdominal pain due to congenital diaphragmatic hernia                                                                                                |
| Chronic abdominal pain due to congenital malformations of the abdominal wall                                                                                 |
| Chronic abdominal pain, chronic respiratory problems and developmental delay due to congenital diaphragmatic hernia                                          |
| Chronic abdominal pain, disfigurement and chronic respiratory problems due to congenital diaphragmatic hernia                                                |
| Chronic abdominal pain, disfigurement and developmental delay due to congenital diaphragmatic hernia                                                         |
| Chronic abdominal pain, disfigurement, developmental delay and chronic respiratory problems due to congenital diaphragmatic hernia                           |
| Chronic respiratory problems and abdominal pain due to congenital atresia and/or stenosis of the digestive tract                                             |
| Chronic respiratory problems and dysphagia or acid reflux due to congenital atresia and/or stenosis of the digestive tract                                   |
| Chronic respiratory problems including difficulty breathing and recurrent upper respiratory infections due to atresia and/or stenosis of the digestive tract |
| Constipation and chronic abdominal pain due to congenital malformations of the abdominal wall                                                                |
| Constipation and concern about scars due to congenital malformations of the abdominal wall                                                                   |
| Constipation due to congenital malformations of the abdominal wall                                                                                           |
| Constipation, chronic abdominal pain and concern about scars due to congenital malformations of the abdominal wall                                           |
| Developmental delay or mild intellectual disability due to congenital diaphragmatic hernia                                                                   |
| Disfigurement and developmental delay due to congenital diaphragmatic hernia                                                                                 |
| Disfigurement and mild chronic respiratory problems due to congenital diaphragmatic hernia                                                                   |
| Disfigurement due to congenital diaphragmatic hernia                                                                                                         |
| Disfigurement from scars following treatment for congenital malformations of the abdominal wall                                                              |
| Disfigurement, chronic respiratory problems and developmental delay due to congenital diaphragmatic hernia                                                   |
| Dysphagia or acid reflux and chronic abdominal pain due to congenital atresia and/or stenosis of the digestive tract                                         |
| Dysphagia or acid reflux due to congenital atresia and/or stenosis of the digestive tract                                                                    |
| Dysphagia or acid reflux, chronic abdominal pain and chronic respiratory problems due to congenital atresia and/or stenosis of the digestive tract           |
| Mild chronic respiratory problems and breathlessness due to congenital diaphragmatic hernia                                                                  |
| Other congenital birth defects                                                                                                                               |
| Complete hearing loss due to other congenital anomalies                                                                                                      |

|                                                                               |
|-------------------------------------------------------------------------------|
| Complete hearing loss with ringing due to other congenital anomalies          |
| Mild hearing loss due to other congenital anomalies                           |
| Mild hearing loss with ringing due to other congenital anomalies              |
| Moderate hearing loss due to other congenital anomalies                       |
| Moderate hearing loss with ringing due to other congenital anomalies          |
| Moderately severe hearing loss due to other congenital anomalies              |
| Moderately severe hearing loss with ringing due to other congenital anomalies |
| Profound hearing loss due to other congenital anomalies                       |
| Profound hearing loss with ringing due to other congenital anomalies          |
| Severe hearing loss due to other congenital anomalies                         |
| Severe hearing loss with ringing due to other congenital anomalies            |
| Skin and subcutaneous diseases                                                |
| Dermatitis                                                                    |
| Asymptomatic contact dermatitis                                               |
| Asymptomatic seborrheic dermatitis                                            |
| Mild atopic dermatitis                                                        |
| Mild contact dermatitis                                                       |
| Moderate atopic dermatitis                                                    |
| Moderate contact dermatitis                                                   |
| Severe atopic dermatitis                                                      |
| Symptomatic seborrheic dermatitis                                             |
| Psoriasis                                                                     |
| Mild psoriasis                                                                |
| Moderate psoriasis                                                            |
| Severe psoriasis                                                              |
| Cellulitis                                                                    |
| Mild cellulitis                                                               |
| Moderate cellulitis                                                           |
| Severe cellulitis                                                             |
| Pyoderma                                                                      |
| Abscess and other bacterial skin diseases                                     |
| Impetigo                                                                      |
| Scabies                                                                       |
| Fungal skin diseases                                                          |
| Other fungal skin diseases                                                    |
| Tinea capitis                                                                 |
| Viral skin diseases                                                           |
| Mild molluscum contagiosum                                                    |
| Mild viral warts                                                              |
| Severe molluscum contagiosum                                                  |
| Severe viral warts                                                            |
| Acne vulgaris                                                                 |
| Mild acne vulgaris                                                            |

|                                                                                       |
|---------------------------------------------------------------------------------------|
| Moderate acne vulgaris                                                                |
| Severe acne vulgaris                                                                  |
| Alopecia areata                                                                       |
| Mild alopecia areata                                                                  |
| Severe alopecia areata                                                                |
| Pruritus                                                                              |
| Urticaria                                                                             |
| Mild urticaria                                                                        |
| Severe urticaria                                                                      |
| Decubitus ulcer                                                                       |
| Mild decubitus ulcer                                                                  |
| Moderate decubitus ulcer                                                              |
| Severe decubitus ulcer                                                                |
| Other skin and subcutaneous diseases                                                  |
| Asymptomatic other skin and subcutaneous diseases                                     |
| Symptomatic other skin and subcutaneous diseases                                      |
| Sense organ diseases                                                                  |
| Glaucoma                                                                              |
| Blindness due to glaucoma                                                             |
| Moderate vision impairment due to glaucoma                                            |
| Severe vision impairment due to glaucoma                                              |
| Cataract                                                                              |
| Blindness due to cataract                                                             |
| Moderate vision impairment due to cataract                                            |
| Severe vision impairment due to cataract                                              |
| Macular degeneration                                                                  |
| Blindness due to macular degeneration                                                 |
| Moderate vision impairment due to macular degeneration                                |
| Severe vision impairment due to macular degeneration                                  |
| Refraction and accommodation disorders                                                |
| Blindness due to uncorrected refractive error                                         |
| Moderate vision impairment due to uncorrected refractive error                        |
| Near vision impairment                                                                |
| Severe vision impairment due to uncorrected refractive error                          |
| Age-related and other hearing loss                                                    |
| Complete hearing loss due to age-related and other hearing loss                       |
| Complete hearing loss with ringing due to age-related and other hearing loss          |
| Mild hearing loss due to age-related and other hearing loss                           |
| Mild hearing loss with ringing due to age-related and other hearing loss              |
| Moderate hearing loss due to age-related and other hearing loss                       |
| Moderate hearing loss with ringing due to age-related and other hearing loss          |
| Moderately severe hearing loss due to age-related and other hearing loss              |
| Moderately severe hearing loss with ringing due to age-related and other hearing loss |

|                                                                              |
|------------------------------------------------------------------------------|
| Profound hearing loss due to age-related and other hearing loss              |
| Profound hearing loss with ringing due to age-related and other hearing loss |
| Severe hearing loss due to age-related and other hearing loss                |
| Severe hearing loss with ringing due to age-related and other hearing loss   |
| Other vision loss                                                            |
| Blindness due to other vision loss                                           |
| Moderate vision impairment due to other vision loss                          |
| Severe vision impairment due to other vision loss                            |
| Other sense organ diseases                                                   |
| Asymptomatic acute sense organ diseases                                      |
| Asymptomatic chronic sense organ diseases                                    |
| Mild acute sense organ diseases                                              |
| Moderate acute sense organ diseases                                          |
| Moderate chronic sense organ diseases                                        |
| Severe chronic sense organ diseases                                          |
| Oral disorders                                                               |
| Caries of deciduous teeth                                                    |
| Asymptomatic caries of deciduous teeth                                       |
| Pain due to caries of deciduous teeth                                        |
| Caries of permanent teeth                                                    |
| Asymptomatic caries of permanent teeth                                       |
| Pain due to caries of permanent teeth                                        |
| Periodontal diseases                                                         |
| Chronic periodontal diseases                                                 |
| Edentulism and severe tooth loss                                             |
| Asymptomatic edentulism and severe tooth loss                                |
| Difficulty eating due to edentulism and severe tooth loss                    |
| Other oral disorders                                                         |
| Mild other oral disorders                                                    |
| Severe other oral disorders                                                  |
| Sudden infant death syndrome                                                 |
| Injuries                                                                     |
| Transport injuries                                                           |
| Road injuries                                                                |
| Pedestrian road injuries                                                     |
| Cyclist road injuries                                                        |
| Motorcyclist road injuries                                                   |
| Motor vehicle road injuries                                                  |
| Other road injuries                                                          |
| Other transport injuries                                                     |
| Unintentional injuries                                                       |
| Falls                                                                        |
| Drowning                                                                     |

|                                                                              |
|------------------------------------------------------------------------------|
| Fire, heat, and hot substances                                               |
| Poisonings                                                                   |
| Exposure to mechanical forces                                                |
| Unintentional firearm injuries                                               |
| Unintentional suffocation                                                    |
| Other exposure to mechanical forces                                          |
| Adverse effects of medical treatment                                         |
| Animal contact                                                               |
| Venomous animal contact                                                      |
| Non-venomous animal contact                                                  |
| Foreign body                                                                 |
| Pulmonary aspiration and foreign body in airway                              |
| Foreign body in eyes                                                         |
| Foreign body in other body part                                              |
| Environmental heat and cold exposure                                         |
| Other unintentional injuries                                                 |
| Self-harm and interpersonal violence                                         |
| Self-harm                                                                    |
| Self-harm by firearm                                                         |
| Self-harm by other specified means                                           |
| Interpersonal violence                                                       |
| Physical violence by firearm                                                 |
| Physical violence by sharp object                                            |
| Sexual violence                                                              |
| Physical violence by other means                                             |
| Forces of nature, conflict and terrorism, and executions and police conflict |
| Exposure to forces of nature                                                 |
| Conflict and terrorism                                                       |
| Executions and police conflict                                               |

**Appendix Table 6. GBD 2016 sequelae, health states, health state lay descriptions, and disability weights**

| Sequela                                                                                            | Health state name                                            | Health state lay description                                                                                                                                   | Disability weight      |
|----------------------------------------------------------------------------------------------------|--------------------------------------------------------------|----------------------------------------------------------------------------------------------------------------------------------------------------------------|------------------------|
| Drug-susceptible tuberculosis                                                                      | Tuberculosis, not HIV infected                               | has a persistent cough and fever, is short of breath, feels weak, and has lost a lot of weight.                                                                | 0.333<br>(0.224–0.454) |
| Multidrug-resistant tuberculosis without extensive drug resistance                                 | Tuberculosis, not HIV infected                               | has a persistent cough and fever, is short of breath, feels weak, and has lost a lot of weight.                                                                | 0.333<br>(0.224–0.454) |
| Extensively drug-resistant tuberculosis                                                            | Tuberculosis, not HIV infected                               | has a persistent cough and fever, is short of breath, feels weak, and has lost a lot of weight.                                                                | 0.333<br>(0.224–0.454) |
| Latent tuberculosis infection                                                                      | Asymptomatic                                                 | --                                                                                                                                                             | --                     |
| Drug-susceptible HIV/AIDS - Tuberculosis with severe anemia                                        | Tuberculosis, HIV infected and anemia, severe                | (combined DW)                                                                                                                                                  | 0.495<br>(0.353–0.64)  |
| Drug-susceptible HIV/AIDS - Tuberculosis with moderate anemia                                      | Tuberculosis, HIV infected and anemia, moderate              | (combined DW)                                                                                                                                                  | 0.439<br>(0.307–0.577) |
| Drug-susceptible HIV/AIDS - Tuberculosis with mild anemia                                          | Tuberculosis, HIV infected and anemia, mild                  | (combined DW)                                                                                                                                                  | 0.411<br>(0.278–0.551) |
| Drug-susceptible HIV/AIDS - Tuberculosis without anemia                                            | Tuberculosis, HIV infected                                   | has a persistent cough and fever, shortness of breath, night sweats, weakness and fatigue and severe weight loss.                                              | 0.408<br>(0.274–0.549) |
| Multidrug-resistant HIV/AIDS - Tuberculosis without extensive drug resistance with severe anemia   | Tuberculosis, HIV infected and anemia, severe                | (combined DW)                                                                                                                                                  | 0.495<br>(0.353–0.64)  |
| Multidrug-resistant HIV/AIDS - Tuberculosis without extensive drug resistance without anemia       | Tuberculosis, HIV infected                                   | has a persistent cough and fever, shortness of breath, night sweats, weakness and fatigue and severe weight loss.                                              | 0.408<br>(0.274–0.549) |
| Multidrug-resistant HIV/AIDS - Tuberculosis without extensive drug resistance with moderate anemia | Tuberculosis, HIV infected and anemia, moderate              | (combined DW)                                                                                                                                                  | 0.439<br>(0.307–0.577) |
| Multidrug-resistant HIV/AIDS - Tuberculosis without extensive drug resistance with mild anemia     | Tuberculosis, HIV infected and anemia, mild                  | (combined DW)                                                                                                                                                  | 0.411<br>(0.278–0.551) |
| Extensively drug-resistant HIV/AIDS - Tuberculosis with mild anemia                                | Tuberculosis, HIV infected and anemia, mild                  | (combined DW)                                                                                                                                                  | 0.411<br>(0.278–0.551) |
| Extensively drug-resistant HIV/AIDS - Tuberculosis with severe anemia                              | Tuberculosis, HIV infected and anemia, severe                | (combined DW)                                                                                                                                                  | 0.495<br>(0.353–0.64)  |
| Extensively drug-resistant HIV/AIDS - Tuberculosis without anemia                                  | Tuberculosis, HIV infected                                   | has a persistent cough and fever, shortness of breath, night sweats, weakness and fatigue and severe weight loss.                                              | 0.408<br>(0.274–0.549) |
| Extensively drug-resistant HIV/AIDS - Tuberculosis with moderate anemia                            | Tuberculosis, HIV infected and anemia, moderate              | (combined DW)                                                                                                                                                  | 0.439<br>(0.307–0.577) |
| Early HIV with severe anemia                                                                       | Anemia, severe; Generic uncomplicated disease anxiety        | --                                                                                                                                                             | --                     |
| Symptomatic HIV without anemia                                                                     | HIV cases, symptomatic, pre-AIDS                             | has weight loss, fatigue, and frequent infections.                                                                                                             | 0.274<br>(0.184–0.377) |
| Early HIV with mild anemia                                                                         | Anemia, mild; Generic uncomplicated disease anxiety          | --                                                                                                                                                             | --                     |
| AIDS without antiretroviral treatment without anemia                                               | AIDS cases, not receiving ARV treatment                      | has severe weight loss, weakness, fatigue, cough and fever, and frequent infections, skin rashes and diarrhea.                                                 | 0.582<br>(0.406–0.743) |
| AIDS with antiretroviral treatment without anemia                                                  | HIV/AIDS cases, receiving ARV treatment                      | has occasional fevers and infections. The person takes daily medication that sometimes causes diarrhea.                                                        | 0.078<br>(0.052–0.111) |
| Early HIV with moderate anemia                                                                     | Anemia, moderate; Generic uncomplicated disease anxiety      | --                                                                                                                                                             | --                     |
| Early HIV without anemia                                                                           | Generic uncomplicated disease: anxiety about diagnosis       | has a disease diagnosis that causes some worry but minimal interference with daily activities.                                                                 | 0.012<br>(0.006–0.023) |
| Symptomatic HIV with moderate anemia                                                               | HIV cases, symptomatic, pre-AIDS and anemia, moderate        | (combined DW)                                                                                                                                                  | 0.312<br>(0.217–0.418) |
| Symptomatic HIV with severe anemia                                                                 | HIV cases, symptomatic, pre-AIDS and anemia, severe          | (combined DW)                                                                                                                                                  | 0.381<br>(0.269–0.505) |
| AIDS with antiretroviral treatment with mild anemia                                                | HIV/AIDS cases, receiving ARV treatment and anemia, mild     | (combined DW)                                                                                                                                                  | 0.081<br>(0.054–0.116) |
| AIDS with antiretroviral treatment with moderate anemia                                            | HIV/AIDS cases, receiving ARV treatment and anemia, moderate | (combined DW)                                                                                                                                                  | 0.125<br>(0.085–0.176) |
| AIDS with antiretroviral treatment with severe anemia                                              | HIV/AIDS cases, receiving ARV treatment and anemia, severe   | (combined DW)                                                                                                                                                  | 0.215<br>(0.148–0.295) |
| AIDS without antiretroviral treatment with mild anemia                                             | AIDS cases, not receiving ARV treatment and anemia, mild     | (combined DW)                                                                                                                                                  | 0.583<br>(0.409–0.743) |
| AIDS without antiretroviral treatment with moderate anemia                                         | AIDS cases, not receiving ARV treatment and anemia, moderate | (combined DW)                                                                                                                                                  | 0.603<br>(0.43–0.758)  |
| AIDS without antiretroviral treatment with severe anemia                                           | AIDS cases, not receiving ARV treatment and anemia, severe   | (combined DW)                                                                                                                                                  | 0.642<br>(0.47–0.792)  |
| Symptomatic HIV with mild anemia                                                                   | HIV cases, symptomatic, pre-AIDS and anemia, mild            | (combined DW)                                                                                                                                                  | 0.277<br>(0.189–0.379) |
| Mild diarrheal diseases                                                                            | Diarrhea, mild                                               | has diarrhea three or more times a day with occasional discomfort in the belly.                                                                                | 0.074<br>(0.049–0.104) |
| Guillain-Barré syndrome due to diarrheal diseases                                                  | Spinal cord lesion below neck level (treated)                | is paralyzed from the waist down, cannot feel or move the legs and has difficulties with urine and bowel control. The person uses a wheelchair to move around. | 0.296<br>(0.198–0.414) |
| Severe diarrheal diseases                                                                          | Diarrhea, severe                                             | has diarrhea three or more times a day with severe belly cramps. The person is very thirsty and feels nauseous and tired.                                      | 0.247<br>(0.164–0.348) |
| Moderate diarrheal diseases                                                                        | Diarrhea, moderate                                           | has diarrhea three or more times a day, with painful cramps in the belly and feeling thirsty                                                                   | 0.188<br>(0.125–0.264) |
| Intestinal perforation due to typhoid                                                              | Abdominopelvic problem, severe                               | has severe pain in the belly and feels nauseous. The person is anxious and unable to carry out daily activities.                                               | 0.324<br>(0.22–0.442)  |
| Severe typhoid fever                                                                               | Infectious disease, acute episode, severe                    | has a high fever and pain, and feels very weak, which causes great difficulty with daily activities.                                                           | 0.133<br>(0.088–0.19)  |
| Gastrointestinal bleeding due to typhoid                                                           | Gastric bleeding                                             | vomits blood and feels nauseous.                                                                                                                               | 0.325<br>(0.209–0.462) |

**Appendix Table 6. GBD 2016 sequelae, health states, health state lay descriptions, and disability weights**

| Sequela                                                                    | Health state name                                                  | Health state lay description                                                                                                                                                                                                                                                                                                                                                                     | Disability weight      |
|----------------------------------------------------------------------------|--------------------------------------------------------------------|--------------------------------------------------------------------------------------------------------------------------------------------------------------------------------------------------------------------------------------------------------------------------------------------------------------------------------------------------------------------------------------------------|------------------------|
| Acute typhoid infection                                                    | Infectious disease, acute episode, moderate                        | has a fever and aches, and feels weak, which causes some difficulty with daily activities.                                                                                                                                                                                                                                                                                                       | 0.051<br>(0.032–0.074) |
| Acute paratyphoid infection                                                | Infectious disease, acute episode, mild                            | has a low fever and mild discomfort, but no difficulty with daily activities.                                                                                                                                                                                                                                                                                                                    | 0.006<br>(0.002–0.012) |
| Moderate paratyphoid fever                                                 | Infectious disease, acute episode, moderate                        | has a fever and aches, and feels weak, which causes some difficulty with daily activities.                                                                                                                                                                                                                                                                                                       | 0.051<br>(0.032–0.074) |
| Intestinal perforation due to paratyphoid                                  | Abdominopelvic problem, moderate                                   | has pain in the belly and feels nauseous. The person has difficulties with daily activities.                                                                                                                                                                                                                                                                                                     | 0.114<br>(0.078–0.159) |
| Severe paratyphoid fever                                                   | Infectious disease, acute episode, severe                          | has a high fever and pain, and feels very weak, which causes great difficulty with daily activities.                                                                                                                                                                                                                                                                                             | 0.133<br>(0.088–0.19)  |
| Other intestinal infectious diseases                                       | Post-COMO calculation for residuals (YLL/YLD ratio, other methods) | --                                                                                                                                                                                                                                                                                                                                                                                               | --                     |
| Guillain-Barré syndrome due to lower respiratory infections                | Spinal cord lesion below neck level (treated)                      | is paralyzed from the waist down, cannot feel or move the legs and has difficulties with urine and bowel control. The person uses a wheelchair to move around.                                                                                                                                                                                                                                   | 0.296<br>(0.198–0.414) |
| Severe lower respiratory infections                                        | Infectious disease, acute episode, severe                          | has a high fever and pain, and feels very weak, which causes great difficulty with daily activities.                                                                                                                                                                                                                                                                                             | 0.133<br>(0.088–0.19)  |
| Moderate lower respiratory infections                                      | Infectious disease, acute episode, moderate                        | has a fever and aches, and feels weak, which causes some difficulty with daily activities.                                                                                                                                                                                                                                                                                                       | 0.051<br>(0.032–0.074) |
| Mild upper respiratory infections                                          | Infectious disease, acute episode, mild                            | has a low fever and mild discomfort, but no difficulty with daily activities.                                                                                                                                                                                                                                                                                                                    | 0.006<br>(0.002–0.012) |
| Moderate upper respiratory infections                                      | Infectious disease, acute episode, moderate                        | has a fever and aches, and feels weak, which causes some difficulty with daily activities.                                                                                                                                                                                                                                                                                                       | 0.051<br>(0.032–0.074) |
| Guillain-Barré syndrome due to upper respiratory infections                | Spinal cord lesion below neck level (treated)                      | is paralyzed from the waist down, cannot feel or move the legs and has difficulties with urine and bowel control. The person uses a wheelchair to move around.                                                                                                                                                                                                                                   | 0.296<br>(0.198–0.414) |
| Vertigo with moderate hearing loss and ringing due to chronic otitis media | Vertigo with moderate hearing loss and ringing                     | --                                                                                                                                                                                                                                                                                                                                                                                               | --                     |
| Vertigo with moderate hearing loss due to chronic otitis media             | Vertigo with moderate hearing loss                                 | --                                                                                                                                                                                                                                                                                                                                                                                               | --                     |
| Severe infectious complications due to chronic otitis media                | Ear pain                                                           | has an ear-ache that causes some difficulty with daily activities.                                                                                                                                                                                                                                                                                                                               | 0.013<br>(0.007–0.024) |
| Acute otitis media                                                         | Ear pain                                                           | has an ear-ache that causes some difficulty with daily activities.                                                                                                                                                                                                                                                                                                                               | 0.013<br>(0.007–0.024) |
| Vertigo with mild hearing loss and ringing due to chronic otitis media     | Vertigo with mild hearing loss and ringing                         | --                                                                                                                                                                                                                                                                                                                                                                                               | --                     |
| Vertigo with mild hearing loss due to chronic otitis media                 | Vertigo with mild hearing loss                                     | --                                                                                                                                                                                                                                                                                                                                                                                               | --                     |
| Moderate hearing loss due to chronic otitis media                          | Hearing loss, moderate                                             | is unable to hear and understand another person talking in a noisy place (for example, on an urban street), and has difficulty hearing another person talking even in a quiet place or on the phone.                                                                                                                                                                                             | 0.027<br>(0.015–0.042) |
| Mild hearing loss due to chronic otitis media                              | Hearing loss, mild                                                 | has great difficulty hearing and understanding another person talking in a noisy place (for example, on an urban street).                                                                                                                                                                                                                                                                        | 0.01<br>(0.004–0.019)  |
| Moderate hearing loss with ringing due to chronic otitis media             | Hearing loss, moderate, with ringing                               | is unable to hear and understand another person talking in a noisy place (for example, on an urban street), and has difficulty hearing another person talking even in a quiet place or on the phone, and has annoying ringing in the ears for more than 5 minutes at a time, almost everyday.                                                                                                    | 0.074<br>(0.049–0.107) |
| Mild hearing loss with ringing due to chronic otitis media                 | Hearing loss, mild, with ringing                                   | has great difficulty hearing and understanding another person talking in a noisy place (for example, on an urban street), and sometimes has annoying ringing in the ears.                                                                                                                                                                                                                        | 0.021<br>(0.012–0.036) |
| Epilepsy due to pneumococcal meningitis                                    | Epilepsy                                                           | (combined DW)                                                                                                                                                                                                                                                                                                                                                                                    | --                     |
| Profound hearing loss due to pneumococcal meningitis                       | Hearing loss, profound                                             | is unable to hear and understand another person talking, even in a quiet place, is unable to take part in a phone conversation, and has great difficulty hearing anything in any other situation. Difficulties with communicating and relating to others often cause worry, depression, and loneliness.                                                                                          | 0.204<br>(0.134–0.288) |
| Acute pneumococcal meningitis                                              | Infectious disease, acute episode, severe                          | has a high fever and pain, and feels very weak, which causes great difficulty with daily activities.                                                                                                                                                                                                                                                                                             | 0.133<br>(0.088–0.19)  |
| Severe hearing loss with ringing due to pneumococcal meningitis            | Hearing loss, severe, with ringing                                 | is unable to hear and understand another person talking, even in a quiet place, and unable to take part in a phone conversation, and has annoying ringing in the ears for more than 5 minutes at a time, almost everyday. Difficulties with communicating and relating to others cause emotional impact at times (for example worry or depression).                                              | 0.261<br>(0.175–0.36)  |
| Moderately severe hearing loss due to pneumococcal meningitis              | Hearing loss, moderately severe                                    | (custom DW from hearing loss impairment envelope)                                                                                                                                                                                                                                                                                                                                                | --                     |
| Borderline intellectual disability due to pneumococcal meningitis          | Borderline intellectual functioning                                | is slow in learning at school. As an adult, the person has some difficulty doing complex or unfamiliar tasks but otherwise functions independently.                                                                                                                                                                                                                                              | 0.011<br>(0.005–0.02)  |
| Moderate hearing loss with ringing due to pneumococcal meningitis          | Hearing loss, moderate, with ringing                               | is unable to hear and understand another person talking in a noisy place (for example, on an urban street), and has difficulty hearing another person talking even in a quiet place or on the phone, and has annoying ringing in the ears for more than 5 minutes at a time, almost everyday.                                                                                                    | 0.074<br>(0.049–0.107) |
| Profound hearing loss with ringing due to pneumococcal meningitis          | Hearing loss, profound, with ringing                               | is unable to hear and understand another person talking, even in a quiet place, is unable to take part in a phone conversation, has great difficulty hearing anything in any other situation, and has annoying ringing in the ears for more than 5 minutes at a time, several times a day. Difficulties with communicating and relating to others often cause worry, depression, and loneliness. | 0.277<br>(0.182–0.387) |



**Appendix Table 6. GBD 2016 sequelae, health states, health state lay descriptions, and disability weights**

| Sequela                                                                    | Health state name                                  | Health state lay description                                                                                                                                                                                                                                                                            | Disability weight      |
|----------------------------------------------------------------------------|----------------------------------------------------|---------------------------------------------------------------------------------------------------------------------------------------------------------------------------------------------------------------------------------------------------------------------------------------------------------|------------------------|
| Severe hearing loss due to pneumococcal meningitis                         | Hearing loss, severe                               | is unable to hear and understand another person talking, even in a quiet place, and unable to take part in a phone conversation. Difficulties with communicating and relating to others cause emotional impact at times (for example worry or depression).                                              | 0.158<br>(0.105–0.227) |
| Mild behavioral problems due to pneumococcal meningitis                    | Attention deficit hyperactivity disorder           | is hyperactive and has difficulty concentrating, remembering things, and completing tasks.                                                                                                                                                                                                              | 0.045<br>(0.028–0.066) |
| Severe motor plus cognitive impairments due to pneumococcal meningitis     | Motor plus cognitive impairments, severe           | cannot move around without help, and cannot lift or hold objects, get dressed or sit upright. The person also has very low intelligence, speaks few words, and needs constant supervision and help with all daily activities.                                                                           | 0.542<br>(0.374–0.702) |
| Mild motor impairment due to long term due to pneumococcal meningitis      | Motor impairment, mild                             | has some difficulty in moving around but is able to walk without help.                                                                                                                                                                                                                                  | 0.01<br>(0.005–0.019)  |
| Monocular distance vision loss due to pneumococcal meningitis              | Distance vision, monocular                         | is blind in one eye and has difficulty judging distances                                                                                                                                                                                                                                                | 0.017<br>(0.009–0.029) |
| Severe vision impairment due to pneumococcal meningitis                    | Distance vision, severe impairment                 | has severe vision loss, which causes difficulty in daily activities, some emotional impact (for example worry), and some difficulty going outside the home without assistance.                                                                                                                          | 0.184<br>(0.125–0.258) |
| Moderately severe hearing loss with ringing due to pneumococcal meningitis | Hearing loss, moderately severe, with ringing      | (custom DW from hearing loss impairment envelope)                                                                                                                                                                                                                                                       | --                     |
| Moderate motor impairment due to pneumococcal meningitis                   | Motor impairment, moderate                         | has some difficulty in moving around, and difficulty in lifting and holding objects, dressing and sitting upright, but is able to walk without help.                                                                                                                                                    | 0.061<br>(0.04–0.089)  |
| Mild hearing loss with ringing due to pneumococcal meningitis              | Hearing loss, mild, with ringing                   | has great difficulty hearing and understanding another person talking in a noisy place (for example, on an urban street), and sometimes has annoying ringing in the ears.                                                                                                                               | 0.021<br>(0.012–0.036) |
| Moderate motor plus cognitive impairments due to pneumococcal meningitis   | Motor plus cognitive impairments, moderate         | has some difficulty in moving around, holding objects, dressing and sitting upright, but can walk without help. The person has low intelligence and is slow in learning to speak and to do simple tasks.                                                                                                | 0.203<br>(0.134–0.29)  |
| Mild intellectual disability due to pneumococcal meningitis                | Intellectual disability / mental retardation, mild | has low intelligence and is slow in learning at school. As an adult, the person can live independently, but often needs help to raise children and can only work at simple supervised jobs.                                                                                                             | 0.043<br>(0.026–0.064) |
| Complete hearing loss with ringing due to pneumococcal meningitis          | Hearing loss, complete, with ringing               | cannot hear at all in any situation, including even the loudest sounds, and cannot communicate verbally or use a phone, and has very annoying ringing in the ears for more than half of the day. Difficulties with communicating and relating to others often cause worry, depression or loneliness.    | 0.316<br>(0.212–0.435) |
| Mild motor plus cognitive impairments due to pneumococcal meningitis       | Motor plus cognitive impairments, mild             | has some difficulty in moving around but is able to walk without help. The person is slow in learning at school. As an adult, the person has some difficulty doing complex or unfamiliar tasks but otherwise functions independently.                                                                   | 0.031<br>(0.018–0.05)  |
| Moderate hearing loss due to pneumococcal meningitis                       | Hearing loss, moderate                             | is unable to hear and understand another person talking in a noisy place (for example, on an urban street), and has difficulty hearing another person talking even in a quiet place or on the phone.                                                                                                    | 0.027<br>(0.015–0.042) |
| Moderate vision impairment due to pneumococcal meningitis                  | Distance vision, moderate impairment               | has vision problems that make it difficult to recognize faces or objects across a room.                                                                                                                                                                                                                 | 0.031<br>(0.019–0.049) |
| Mild hearing loss due to pneumococcal meningitis                           | Hearing loss, mild                                 | has great difficulty hearing and understanding another person talking in a noisy place (for example, on an urban street).                                                                                                                                                                               | 0.01<br>(0.004–0.019)  |
| Severe motor impairment due to pneumococcal meningitis                     | Motor impairment, severe                           | is unable to move around without help, and is not able to lift or hold objects, get dressed or sit upright.                                                                                                                                                                                             | 0.402<br>(0.268–0.545) |
| Blindness due to pneumococcal meningitis                                   | Distance vision blindness                          | is completely blind, which causes great difficulty in some daily activities, worry and anxiety, and great difficulty going outside the home without assistance.                                                                                                                                         | 0.187<br>(0.124–0.26)  |
| Complete hearing loss due to pneumococcal meningitis                       | Hearing loss, complete                             | cannot hear at all in any situation, including even the loudest sounds, and cannot communicate verbally or use a phone. Difficulties with communicating and relating to others often cause worry, depression or loneliness.                                                                             | 0.215<br>(0.144–0.307) |
| Monocular distance vision loss due to H influenzae type B meningitis       | Distance vision, monocular                         | is blind in one eye and has difficulty judging distances                                                                                                                                                                                                                                                | 0.017<br>(0.009–0.029) |
| Profound hearing loss due to H influenzae type B meningitis                | Hearing loss, profound                             | is unable to hear and understand another person talking, even in a quiet place, is unable to take part in a phone conversation, and has great difficulty hearing anything in any other situation. Difficulties with communicating and relating to others often cause worry, depression, and loneliness. | 0.204<br>(0.134–0.288) |
| Complete hearing loss due to H influenzae type B meningitis                | Hearing loss, complete                             | cannot hear at all in any situation, including even the loudest sounds, and cannot communicate verbally or use a phone. Difficulties with communicating and relating to others often cause worry, depression or loneliness.                                                                             | 0.215<br>(0.144–0.307) |
| Blindness due to H influenzae type B meningitis                            | Distance vision blindness                          | is completely blind, which causes great difficulty in some daily activities, worry and anxiety, and great difficulty going outside the home without assistance.                                                                                                                                         | 0.187<br>(0.124–0.26)  |
| Complete hearing loss with ringing due to H influenzae type B meningitis   | Hearing loss, complete, with ringing               | cannot hear at all in any situation, including even the loudest sounds, and cannot communicate verbally or use a phone, and has very annoying ringing in the ears for more than half of the day. Difficulties with communicating and relating to others often cause worry, depression or loneliness.    | 0.316<br>(0.212–0.435) |

**Appendix Table 6. GBD 2016 sequelae, health states, health state lay descriptions, and disability weights**

| Sequela                                                                           | Health state name                                  | Health state lay description                                                                                                                                                                                                                                                                                                                                                                   | Disability weight      |
|-----------------------------------------------------------------------------------|----------------------------------------------------|------------------------------------------------------------------------------------------------------------------------------------------------------------------------------------------------------------------------------------------------------------------------------------------------------------------------------------------------------------------------------------------------|------------------------|
| Severe hearing loss with ringing due to H influenzae type B meningitis            | Hearing loss, severe, with ringing                 | is unable to hear and understand another person talking, even in a quiet place, and unable to take part in a phone conversation, and has annoying ringing in the ears for more than 5 minutes at a time, almost everyday. Difficulties with communicating and relating to others cause emotional impact at times (for example worry or depression).                                            | 0.261<br>(0.175–0.36)  |
| Profound hearing loss with ringing due to H influenzae type B meningitis          | Hearing loss, profound, with ringing               | is unable to hear and understand another person talking, even in a quiet place, is unable to take part in a phone conversation, has great difficulty hearing anything in any other situation, and has annoying ringing in the ears for more than 5 minutes at a time, several times a day. Difficulties with communicating and relating to others often cause worry, depression or loneliness. | 0.277<br>(0.182–0.387) |
| Severe vision impairment due to H influenza type B meningitis                     | Distance vision, severe impairment                 | has severe vision loss, which causes difficulty in daily activities, some emotional impact (for example worry), and some difficulty going outside the home without assistance.                                                                                                                                                                                                                 | 0.184<br>(0.125–0.258) |
| Moderate vision impairment due to H influenza type B meningitis                   | Distance vision, moderate impairment               | has vision problems that make it difficult to recognize faces or objects across a room.                                                                                                                                                                                                                                                                                                        | 0.031<br>(0.019–0.049) |
| Mild hearing loss with ringing due to H influenzae type B meningitis              | Hearing loss, mild, with ringing                   | has great difficulty hearing and understanding another person talking in a noisy place (for example, on an urban street), and sometimes has annoying ringing in the ears.                                                                                                                                                                                                                      | 0.021<br>(0.012–0.036) |
| Moderate hearing loss with ringing due to H influenzae type B meningitis          | Hearing loss, moderate, with ringing               | is unable to hear and understand another person talking in a noisy place (for example, on an urban street), and has difficulty hearing another person talking even in a quiet place or on the phone, and has annoying ringing in the ears for more than 5 minutes at a time, almost everyday.                                                                                                  | 0.074<br>(0.049–0.107) |
| Severe hearing loss due to H influenzae type B meningitis                         | Hearing loss, severe                               | is unable to hear and understand another person talking, even in a quiet place, and unable to take part in a phone conversation. Difficulties with communicating and relating to others cause emotional impact at times (for example worry or depression).                                                                                                                                     | 0.158<br>(0.105–0.227) |
| Moderate motor plus cognitive impairments due to H influenzae type B meningitis   | Motor plus cognitive impairments, moderate         | has some difficulty in moving around, holding objects, dressing and sitting upright, but can walk without help. The person has low intelligence and is slow in learning to speak and to do simple tasks.                                                                                                                                                                                       | 0.203<br>(0.134–0.29)  |
| Mild intellectual disability due to H influenzae type B meningitis                | Intellectual disability / mental retardation, mild | has low intelligence and is slow in learning at school. As an adult, the person can live independently, but often needs help to raise children and can only work at simple supervised jobs.                                                                                                                                                                                                    | 0.043<br>(0.026–0.064) |
| Mild motor plus cognitive impairments due to H influenzae type B meningitis       | Motor plus cognitive impairments, mild             | has some difficulty in moving around but is able to walk without help. The person is slow in learning at school. As an adult, the person has some difficulty doing complex or unfamiliar tasks but otherwise functions independently.                                                                                                                                                          | 0.031<br>(0.018–0.05)  |
| Severe motor impairment due to H influenzae type B meningitis                     | Motor impairment, severe                           | is unable to move around without help, and is not able to lift or hold objects, get dressed or sit upright.                                                                                                                                                                                                                                                                                    | 0.402<br>(0.268–0.545) |
| Mild hearing loss due to H influenzae type B meningitis                           | Hearing loss, mild                                 | has great difficulty hearing and understanding another person talking in a noisy place (for example, on an urban street).                                                                                                                                                                                                                                                                      | 0.01<br>(0.004–0.019)  |
| Severe motor plus cognitive impairments due to H influenzae type B meningitis     | Motor plus cognitive impairments, severe           | cannot move around without help, and cannot lift or hold objects, get dressed or sit upright. The person also has very low intelligence, speaks few words, and needs constant supervision and help with all daily activities.                                                                                                                                                                  | 0.542<br>(0.374–0.702) |
| Moderately severe hearing loss due to H influenzae type B meningitis              | Hearing loss, moderately severe                    | (custom DW from hearing loss impairment envelope)                                                                                                                                                                                                                                                                                                                                              | --                     |
| Moderate hearing loss due to H influenzae type B meningitis                       | Hearing loss, moderate                             | is unable to hear and understand another person talking in a noisy place (for example, on an urban street), and has difficulty hearing another person talking even in a quiet place or on the phone.                                                                                                                                                                                           | 0.027<br>(0.015–0.042) |
| Mild behavioral problems due to H influenzae type B meningitis                    | Attention deficit hyperactivity disorder           | is hyperactive and has difficulty concentrating, remembering things, and completing tasks.                                                                                                                                                                                                                                                                                                     | 0.045<br>(0.028–0.066) |
| Acute H influenzae type B meningitis                                              | Infectious disease, acute episode, severe          | has a high fever and pain, and feels very weak, which causes great difficulty with daily activities.                                                                                                                                                                                                                                                                                           | 0.133<br>(0.088–0.19)  |
| Mild motor impairment due to long term due to H influenzae type B meningitis      | Motor impairment, mild                             | has some difficulty in moving around but is able to walk without help.                                                                                                                                                                                                                                                                                                                         | 0.01<br>(0.005–0.019)  |
| Epilepsy due to H influenzae type B meningitis                                    | Epilepsy                                           | (combined DW)                                                                                                                                                                                                                                                                                                                                                                                  | --                     |
| Moderately severe hearing loss with ringing due to H influenzae type B meningitis | Hearing loss, moderately severe, with ringing      | (custom DW from hearing loss impairment envelope)                                                                                                                                                                                                                                                                                                                                              | --                     |
| Moderate motor impairment due to H influenzae type B meningitis                   | Motor impairment, moderate                         | has some difficulty in moving around, and difficulty in lifting and holding objects, dressing and sitting upright, but is able to walk without help.                                                                                                                                                                                                                                           | 0.061<br>(0.04–0.089)  |
| Borderline intellectual disability due to H influenzae type B meningitis          | Borderline intellectual functioning                | is slow in learning at school. As an adult, the person has some difficulty doing complex or unfamiliar tasks but otherwise functions independently.                                                                                                                                                                                                                                            | 0.011<br>(0.005–0.02)  |
| Mild behavioral problems due to meningococcal meningitis                          | Attention deficit hyperactivity disorder           | is hyperactive and has difficulty concentrating, remembering things, and completing tasks.                                                                                                                                                                                                                                                                                                     | 0.045<br>(0.028–0.066) |
| Mild hearing loss with ringing due to meningococcal meningitis                    | Hearing loss, mild, with ringing                   | has great difficulty hearing and understanding another person talking in a noisy place (for example, on an urban street), and sometimes has annoying ringing in the ears.                                                                                                                                                                                                                      | 0.021<br>(0.012–0.036) |
| Complete hearing loss due to meningococcal meningitis                             | Hearing loss, complete                             | cannot hear at all in any situation, including even the loudest sounds, and cannot communicate verbally or use a phone. Difficulties with communicating and relating to others often cause worry, depression or loneliness.                                                                                                                                                                    | 0.215<br>(0.144–0.307) |

**Appendix Table 6. GBD 2016 sequelae, health states, health state lay descriptions, and disability weights**

| Sequela                                                                     | Health state name                                  | Health state lay description                                                                                                                                                                                                                                                                                                                                                                   | Disability weight      |
|-----------------------------------------------------------------------------|----------------------------------------------------|------------------------------------------------------------------------------------------------------------------------------------------------------------------------------------------------------------------------------------------------------------------------------------------------------------------------------------------------------------------------------------------------|------------------------|
| Severe hearing loss due to meningococcal meningitis                         | Hearing loss, severe                               | is unable to hear and understand another person talking, even in a quiet place, and unable to take part in a phone conversation. Difficulties with communicating and relating to others cause emotional impact at times (for example worry or depression).                                                                                                                                     | 0.158<br>(0.105–0.227) |
| Mild intellectual disability due to meningococcal meningitis                | Intellectual disability / mental retardation, mild | has low intelligence and is slow in learning at school. As an adult, the person can live independently, but often needs help to raise children and can only work at simple supervised jobs.                                                                                                                                                                                                    | 0.043<br>(0.026–0.064) |
| Mild hearing loss due to meningococcal meningitis                           | Hearing loss, mild                                 | has great difficulty hearing and understanding another person talking in a noisy place (for example, on an urban street).                                                                                                                                                                                                                                                                      | 0.01<br>(0.004–0.019)  |
| Moderate hearing loss due to meningococcal meningitis                       | Hearing loss, moderate                             | is unable to hear and understand another person talking in a noisy place (for example, on an urban street), and has difficulty hearing another person talking even in a quiet place or on the phone.                                                                                                                                                                                           | 0.027<br>(0.015–0.042) |
| Profound hearing loss due to meningococcal meningitis                       | Hearing loss, profound                             | is unable to hear and understand another person talking, even in a quiet place, is unable to take part in a phone conversation, and has great difficulty hearing anything in any other situation. Difficulties with communicating and relating to others often cause worry, depression, and loneliness.                                                                                        | 0.204<br>(0.134–0.288) |
| Borderline intellectual disability due to meningococcal meningitis          | Borderline intellectual functioning                | is slow in learning at school. As an adult, the person has some difficulty doing complex or unfamiliar tasks but otherwise functions independently.                                                                                                                                                                                                                                            | 0.011<br>(0.005–0.02)  |
| Moderately severe hearing loss due to meningococcal meningitis              | Hearing loss, moderately severe                    | (custom DW from hearing loss impairment envelope)                                                                                                                                                                                                                                                                                                                                              | --                     |
| Moderate vision impairment due to meningococcal meningitis                  | Distance vision, moderate impairment               | has vision problems that make it difficult to recognize faces or objects across a room.                                                                                                                                                                                                                                                                                                        | 0.031<br>(0.019–0.049) |
| Blindness due to meningococcal meningitis                                   | Distance vision blindness                          | is completely blind, which causes great difficulty in some daily activities, worry and anxiety, and great difficulty going outside the home without assistance.                                                                                                                                                                                                                                | 0.187<br>(0.124–0.26)  |
| Mild motor plus cognitive impairments due to meningococcal meningitis       | Motor plus cognitive impairments, mild             | has some difficulty in moving around but is able to walk without help. The person is slow in learning at school. As an adult, the person has some difficulty doing complex or unfamiliar tasks but otherwise functions independently.                                                                                                                                                          | 0.031<br>(0.018–0.05)  |
| Epilepsy due to meningococcal meningitis                                    | Epilepsy                                           | (combined DW)                                                                                                                                                                                                                                                                                                                                                                                  | --                     |
| Moderate motor impairment due to meningococcal meningitis                   | Motor impairment, moderate                         | has some difficulty in moving around, and difficulty in lifting and holding objects, dressing and sitting upright, but is able to walk without help.                                                                                                                                                                                                                                           | 0.061<br>(0.04–0.089)  |
| Severe vision impairment due to meningococcal meningitis                    | Distance vision, severe impairment                 | has severe vision loss, which causes difficulty in daily activities, some emotional impact (for example worry), and some difficulty going outside the home without assistance.                                                                                                                                                                                                                 | 0.184<br>(0.125–0.258) |
| Severe motor impairment due to meningococcal meningitis                     | Motor impairment, severe                           | is unable to move around without help, and is not able to lift or hold objects, get dressed or sit upright.                                                                                                                                                                                                                                                                                    | 0.402<br>(0.268–0.545) |
| Moderate motor plus cognitive impairments due to meningococcal meningitis   | Motor plus cognitive impairments, moderate         | has some difficulty in moving around, holding objects, dressing and sitting upright, but can walk without help. The person has low intelligence and is slow in learning to speak and to do simple tasks.                                                                                                                                                                                       | 0.203<br>(0.134–0.29)  |
| Moderate hearing loss with ringing due to meningococcal meningitis          | Hearing loss, moderate, with ringing               | is unable to hear and understand another person talking in a noisy place (for example, on an urban street), and has difficulty hearing another person talking even in a quiet place or on the phone, and has annoying ringing in the ears for more than 5 minutes at a time, almost everyday.                                                                                                  | 0.074<br>(0.049–0.107) |
| Severe motor plus cognitive impairments due to meningococcal meningitis     | Motor plus cognitive impairments, severe           | cannot move around without help, and cannot lift or hold objects, get dressed or sit upright. The person also has very low intelligence, speaks few words, and needs constant supervision and help with all daily activities.                                                                                                                                                                  | 0.542<br>(0.374–0.702) |
| Monocular distance vision loss due to meningococcal meningitis              | Distance vision, monocular                         | is blind in one eye and has difficulty judging distances                                                                                                                                                                                                                                                                                                                                       | 0.017<br>(0.009–0.029) |
| Profound hearing loss with ringing due to meningococcal meningitis          | Hearing loss, profound, with ringing               | is unable to hear and understand another person talking, even in a quiet place, is unable to take part in a phone conversation, has great difficulty hearing anything in any other situation, and has annoying ringing in the ears for more than 5 minutes at a time, several times a day. Difficulties with communicating and relating to others often cause worry, depression or loneliness. | 0.277<br>(0.182–0.387) |
| Mild motor impairment due to long term due to meningococcal meningitis      | Motor impairment, mild                             | has some difficulty in moving around but is able to walk without help.                                                                                                                                                                                                                                                                                                                         | 0.01<br>(0.005–0.019)  |
| Acute meningococcal meningitis                                              | Infectious disease, acute episode, severe          | has a high fever and pain, and feels very weak, which causes great difficulty with daily activities.                                                                                                                                                                                                                                                                                           | 0.133<br>(0.088–0.19)  |
| Severe hearing loss with ringing due to meningococcal meningitis            | Hearing loss, severe, with ringing                 | is unable to hear and understand another person talking, even in a quiet place, and unable to take part in a phone conversation, and has annoying ringing in the ears for more than 5 minutes at a time, almost everyday. Difficulties with communicating and relating to others cause emotional impact at times (for example worry or depression).                                            | 0.261<br>(0.175–0.36)  |
| Complete hearing loss with ringing due to meningococcal meningitis          | Hearing loss, complete, with ringing               | cannot hear at all in any situation, including even the loudest sounds, and cannot communicate verbally or use a phone, and has very annoying ringing in the ears for more than half of the day. Difficulties with communicating and relating to others often cause worry, depression or loneliness.                                                                                           | 0.316<br>(0.212–0.435) |
| Moderately severe hearing loss with ringing due to meningococcal meningitis | Hearing loss, moderately severe, with ringing      | (custom DW from hearing loss impairment envelope)                                                                                                                                                                                                                                                                                                                                              | --                     |

**Appendix Table 6. GBD 2016 sequelae, health states, health state lay descriptions, and disability weights**

| Sequela                                                                       | Health state name                                  | Health state lay description                                                                                                                                                                                                                                                                                                                                                                   | Disability weight      |
|-------------------------------------------------------------------------------|----------------------------------------------------|------------------------------------------------------------------------------------------------------------------------------------------------------------------------------------------------------------------------------------------------------------------------------------------------------------------------------------------------------------------------------------------------|------------------------|
| Mild intellectual disability due to other bacterial meningitis                | Intellectual disability / mental retardation, mild | has low intelligence and is slow in learning at school. As an adult, the person can live independently, but often needs help to raise children and can only work at simple supervised jobs.                                                                                                                                                                                                    | 0.043<br>(0.026–0.064) |
| Moderate hearing loss with ringing due to other bacterial meningitis          | Hearing loss, moderate, with ringing               | is unable to hear and understand another person talking in a noisy place (for example, on an urban street), and has difficulty hearing another person talking even in a quiet place or on the phone, and has annoying ringing in the ears for more than 5 minutes at a time, almost everyday.                                                                                                  | 0.074<br>(0.049–0.107) |
| Mild motor plus cognitive impairments due to other bacterial meningitis       | Motor plus cognitive impairments, mild             | has some difficulty in moving around but is able to walk without help. The person is slow in learning at school. As an adult, the person has some difficulty doing complex or unfamiliar tasks but otherwise functions independently.                                                                                                                                                          | 0.031<br>(0.018–0.05)  |
| Borderline intellectual disability due to other bacterial meningitis          | Borderline intellectual functioning                | is slow in learning at school. As an adult, the person has some difficulty doing complex or unfamiliar tasks but otherwise functions independently.                                                                                                                                                                                                                                            | 0.011<br>(0.005–0.02)  |
| Moderate motor plus cognitive impairments due to other bacterial meningitis   | Motor plus cognitive impairments, moderate         | has some difficulty in moving around, holding objects, dressing and sitting upright, but can walk without help. The person has low intelligence and is slow in learning to speak and to do simple tasks.                                                                                                                                                                                       | 0.203<br>(0.134–0.29)  |
| Mild behavioral problems due to other bacterial meningitis                    | Attention deficit hyperactivity disorder           | is hyperactive and has difficulty concentrating, remembering things, and completing tasks.                                                                                                                                                                                                                                                                                                     | 0.045<br>(0.028–0.066) |
| Severe motor plus cognitive impairments due to other bacterial meningitis     | Motor plus cognitive impairments, severe           | cannot move around without help, and cannot lift or hold objects, get dressed or sit upright. The person also has very low intelligence, speaks few words, and needs constant supervision and help with all daily activities.                                                                                                                                                                  | 0.542<br>(0.374–0.702) |
| Severe motor impairment due to other bacterial meningitis                     | Motor impairment, severe                           | is unable to move around without help, and is not able to lift or hold objects, get dressed or sit upright.                                                                                                                                                                                                                                                                                    | 0.402<br>(0.268–0.545) |
| Moderately severe hearing loss due to other bacterial meningitis              | Hearing loss, moderately severe                    | (custom DW from hearing loss impairment envelope)                                                                                                                                                                                                                                                                                                                                              | --                     |
| Monocular distance vision loss due to other bacterial meningitis              | Distance vision, monocular                         | is blind in one eye and has difficulty judging distances                                                                                                                                                                                                                                                                                                                                       | 0.017<br>(0.009–0.029) |
| Mild hearing loss due to other bacterial meningitis                           | Hearing loss, mild                                 | has great difficulty hearing and understanding another person talking in a noisy place (for example, on an urban street).                                                                                                                                                                                                                                                                      | 0.01<br>(0.004–0.019)  |
| Moderate hearing loss due to other bacterial meningitis                       | Hearing loss, moderate                             | is unable to hear and understand another person talking in a noisy place (for example, on an urban street), and has difficulty hearing another person talking even in a quiet place or on the phone.                                                                                                                                                                                           | 0.027<br>(0.015–0.042) |
| Epilepsy due to other meningitis                                              | Epilepsy                                           | (combined DW)                                                                                                                                                                                                                                                                                                                                                                                  | --                     |
| Moderately severe hearing loss with ringing due to other bacterial meningitis | Hearing loss, moderately severe, with ringing      | (custom DW from hearing loss impairment envelope)                                                                                                                                                                                                                                                                                                                                              | --                     |
| Severe hearing loss due to other bacterial meningitis                         | Hearing loss, severe                               | is unable to hear and understand another person talking, even in a quiet place, and unable to take part in a phone conversation. Difficulties with communicating and relating to others cause emotional impact at times (for example worry or depression).                                                                                                                                     | 0.158<br>(0.105–0.227) |
| Blindness due to other bacterial meningitis                                   | Distance vision blindness                          | is completely blind, which causes great difficulty in some daily activities, worry and anxiety, and great difficulty going outside the home without assistance.                                                                                                                                                                                                                                | 0.187<br>(0.124–0.26)  |
| Profound hearing loss due to other bacterial meningitis                       | Hearing loss, profound                             | is unable to hear and understand another person talking, even in a quiet place, is unable to take part in a phone conversation, and has great difficulty hearing anything in any other situation. Difficulties with communicating and relating to others often cause worry, depression, and loneliness.                                                                                        | 0.204<br>(0.134–0.288) |
| Moderate vision impairment due to other bacterial meningitis                  | Distance vision, moderate impairment               | has vision problems that make it difficult to recognize faces or objects across a room.                                                                                                                                                                                                                                                                                                        | 0.031<br>(0.019–0.049) |
| Complete hearing loss with ringing due to other bacterial meningitis          | Hearing loss, complete, with ringing               | cannot hear at all in any situation, including even the loudest sounds, and cannot communicate verbally or use a phone, and has very annoying ringing in the ears for more than half of the day. Difficulties with communicating and relating to others often cause worry, depression or loneliness.                                                                                           | 0.316<br>(0.212–0.435) |
| Complete hearing loss due to other bacterial meningitis                       | Hearing loss, complete                             | cannot hear at all in any situation, including even the loudest sounds, and cannot communicate verbally or use a phone. Difficulties with communicating and relating to others often cause worry, depression or loneliness.                                                                                                                                                                    | 0.215<br>(0.144–0.307) |
| Profound hearing loss with ringing due to other bacterial meningitis          | Hearing loss, profound, with ringing               | is unable to hear and understand another person talking, even in a quiet place, is unable to take part in a phone conversation, has great difficulty hearing anything in any other situation, and has annoying ringing in the ears for more than 5 minutes at a time, several times a day. Difficulties with communicating and relating to others often cause worry, depression or loneliness. | 0.277<br>(0.182–0.387) |
| Severe hearing loss with ringing due to other bacterial meningitis            | Hearing loss, severe, with ringing                 | is unable to hear and understand another person talking, even in a quiet place, and unable to take part in a phone conversation, and has annoying ringing in the ears for more than 5 minutes at a time, almost everyday. Difficulties with communicating and relating to others cause emotional impact at times (for example worry or depression).                                            | 0.261<br>(0.175–0.36)  |
| Mild hearing loss due with ringing due to other bacterial meningitis          | Hearing loss, mild, with ringing                   | has great difficulty hearing and understanding another person talking in a noisy place (for example, on an urban street), and sometimes has annoying ringing in the ears.                                                                                                                                                                                                                      | 0.021<br>(0.012–0.036) |

**Appendix Table 6. GBD 2016 sequelae, health states, health state lay descriptions, and disability weights**

| Sequela                                                                                      | Health state name                                                    | Health state lay description                                                                                                                                                                                                          | Disability weight      |
|----------------------------------------------------------------------------------------------|----------------------------------------------------------------------|---------------------------------------------------------------------------------------------------------------------------------------------------------------------------------------------------------------------------------------|------------------------|
| Moderate motor impairment due to other bacterial meningitis                                  | Motor impairment, moderate                                           | has some difficulty in moving around, and difficulty in lifting and holding objects, dressing and sitting upright, but is able to walk without help.                                                                                  | 0.061<br>(0.04–0.089)  |
| Severe vision impairment due to other bacterial meningitis                                   | Distance vision, severe impairment                                   | has severe vision loss, which causes difficulty in daily activities, some emotional impact (for example worry), and some difficulty going outside the home without assistance.                                                        | 0.184<br>(0.125–0.258) |
| Mild motor impairment due to long term due to other bacterial meningitis                     | Motor impairment, mild                                               | has some difficulty in moving around but is able to walk without help.                                                                                                                                                                | 0.01<br>(0.005–0.019)  |
| Other acute bacterial meningitis                                                             | Infectious disease, acute episode, severe                            | has a high fever and pain, and feels very weak, which causes great difficulty with daily activities.                                                                                                                                  | 0.133<br>(0.088–0.19)  |
| Acute viral meningitis                                                                       | Infectious disease, acute episode, severe                            | has a high fever and pain, and feels very weak, which causes great difficulty with daily activities.                                                                                                                                  | 0.133<br>(0.088–0.19)  |
| Blindness due to encephalitis                                                                | Distance vision blindness                                            | is completely blind, which causes great difficulty in some daily activities, worry and anxiety, and great difficulty going outside the home without assistance.                                                                       | 0.187<br>(0.124–0.26)  |
| Epilepsy due to encephalitis                                                                 | Epilepsy                                                             | (combined DW)                                                                                                                                                                                                                         | --                     |
| Monocular distance vision loss due to encephalitis                                           | Distance vision, monocular                                           | is blind in one eye and has difficulty judging distances                                                                                                                                                                              | 0.017<br>(0.009–0.029) |
| Severe motor plus cognitive impairments due to encephalitis                                  | Motor plus cognitive impairments, severe                             | cannot move around without help, and cannot lift or hold objects, get dressed or sit upright. The person also has very low intelligence, speaks few words, and needs constant supervision and help with all daily activities.         | 0.542<br>(0.374–0.702) |
| Moderate motor plus cognitive impairments due to encephalitis                                | Motor plus cognitive impairments, moderate                           | has some difficulty in moving around, holding objects, dressing and sitting upright, but can walk without help. The person has low intelligence and is slow in learning to speak and to do simple tasks.                              | 0.203<br>(0.134–0.29)  |
| Mild motor plus cognitive impairments due to encephalitis                                    | Motor plus cognitive impairments, mild                               | has some difficulty in moving around but is able to walk without help. The person is slow in learning at school. As an adult, the person has some difficulty doing complex or unfamiliar tasks but otherwise functions independently. | 0.031<br>(0.018–0.05)  |
| Mild behavioral problems due to encephalitis                                                 | Attention deficit hyperactivity disorder                             | is hyperactive and has difficulty concentrating, remembering things, and completing tasks.                                                                                                                                            | 0.045<br>(0.028–0.066) |
| Severe motor impairment due to encephalitis                                                  | Motor impairment, severe                                             | is unable to move around without help, and is not able to lift or hold objects, get dressed or sit upright.                                                                                                                           | 0.402<br>(0.268–0.545) |
| Acute encephalitis                                                                           | Infectious disease, acute episode, severe                            | has a high fever and pain, and feels very weak, which causes great difficulty with daily activities.                                                                                                                                  | 0.133<br>(0.088–0.19)  |
| Borderline intellectual disability due to encephalitis                                       | Borderline intellectual functioning                                  | is slow in learning at school. As an adult, the person has some difficulty doing complex or unfamiliar tasks but otherwise functions independently.                                                                                   | 0.011<br>(0.005–0.02)  |
| Moderate motor impairment due to encephalitis                                                | Motor impairment, moderate                                           | has some difficulty in moving around, and difficulty in lifting and holding objects, dressing and sitting upright, but is able to walk without help.                                                                                  | 0.061<br>(0.04–0.089)  |
| Mild intellectual disability due to encephalitis                                             | Intellectual disability / mental retardation, mild                   | has low intelligence and is slow in learning at school. As an adult, the person can live independently, but often needs help to raise children and can only work at simple supervised jobs.                                           | 0.043<br>(0.026–0.064) |
| Mild motor impairment due to long term due to encephalitis                                   | Motor impairment, mild                                               | has some difficulty in moving around but is able to walk without help.                                                                                                                                                                | 0.01<br>(0.005–0.019)  |
| Moderate vision impairment due to encephalitis                                               | Distance vision, moderate impairment                                 | has vision problems that make it difficult to recognize faces or objects across a room.                                                                                                                                               | 0.031<br>(0.019–0.049) |
| Severe vision impairment due to encephalitis                                                 | Distance vision, severe impairment                                   | has severe vision loss, which causes difficulty in daily activities, some emotional impact (for example worry), and some difficulty going outside the home without assistance.                                                        | 0.184<br>(0.125–0.258) |
| Severe diphtheria                                                                            | Infectious disease, acute episode, severe                            | has a high fever and pain, and feels very weak, which causes great difficulty with daily activities.                                                                                                                                  | 0.133<br>(0.088–0.19)  |
| Moderate diphtheria                                                                          | Infectious disease, acute episode, moderate                          | has a fever and aches, and feels weak, which causes some difficulty with daily activities.                                                                                                                                            | 0.051<br>(0.032–0.074) |
| Whooping cough                                                                               | Infectious disease, acute episode, moderate                          | has a fever and aches, and feels weak, which causes some difficulty with daily activities.                                                                                                                                            | 0.051<br>(0.032–0.074) |
| Severe motor plus cognitive impairment with blindness due to neonatal tetanus                | Severe motor plus cognitive impairment with blindness                | (combined DW)                                                                                                                                                                                                                         | --                     |
| Severe motor impairment with blindness and epilepsy due to neonatal tetanus                  | Severe motor impairment with blindness and epilepsy                  | (combined DW)                                                                                                                                                                                                                         | --                     |
| Severe motor impairment with epilepsy due to neonatal tetanus                                | Severe motor impairment with epilepsy                                | (combined DW)                                                                                                                                                                                                                         | --                     |
| Severe motor impairment with blindness due to neonatal tetanus                               | Severe motor impairment with blindness                               | (combined DW)                                                                                                                                                                                                                         | --                     |
| Moderate motor plus cognitive impairment with blindness and epilepsy due to neonatal tetanus | Moderate motor plus cognitive impairment with blindness and epilepsy | (combined DW)                                                                                                                                                                                                                         | --                     |
| Moderate motor plus cognitive impairment with epilepsy due to neonatal tetanus               | Moderate motor plus cognitive impairment with epilepsy               | (combined DW)                                                                                                                                                                                                                         | --                     |
| Moderate motor impairment with epilepsy due to neonatal tetanus                              | Moderate motor impairment with epilepsy                              | (combined DW)                                                                                                                                                                                                                         | --                     |
| Moderate motor impairment with blindness and epilepsy due to neonatal tetanus                | Moderate motor impairment with blindness and epilepsy                | (combined DW)                                                                                                                                                                                                                         | --                     |
| Severe motor impairment due to neonatal tetanus                                              | Motor impairment, severe                                             | is unable to move around without help, and is not able to lift or hold objects, get dressed or sit upright.                                                                                                                           | 0.402<br>(0.268–0.545) |
| Mild motor impairment due to neonatal tetanus                                                | Motor impairment, mild                                               | has some difficulty in moving around but is able to walk without help.                                                                                                                                                                | 0.01<br>(0.005–0.019)  |
| Moderate motor impairment due to neonatal tetanus                                            | Motor impairment, moderate                                           | has some difficulty in moving around, and difficulty in lifting and holding objects, dressing and sitting upright, but is able to walk without help.                                                                                  | 0.061<br>(0.04–0.089)  |



**Appendix Table 6. GBD 2016 sequelae, health states, health state lay descriptions, and disability weights**

| Sequela                                                                                    | Health state name                                                    | Health state lay description                                                                                                                                                                                                          | Disability weight      |
|--------------------------------------------------------------------------------------------|----------------------------------------------------------------------|---------------------------------------------------------------------------------------------------------------------------------------------------------------------------------------------------------------------------------------|------------------------|
| Severe motor plus cognitive impairment with epilepsy due to neonatal tetanus               | Severe motor plus cognitive impairment with epilepsy                 | (combined DW)                                                                                                                                                                                                                         | --                     |
| Severe tetanus                                                                             | Infectious disease, acute episode, severe                            | has a high fever and pain, and feels very weak, which causes great difficulty with daily activities.                                                                                                                                  | 0.133<br>(0.088–0.19)  |
| Mild motor plus cognitive impairments due to neonatal tetanus                              | Motor plus cognitive impairments, mild                               | has some difficulty in moving around but is able to walk without help. The person is slow in learning at school. As an adult, the person has some difficulty doing complex or unfamiliar tasks but otherwise functions independently. | 0.031<br>(0.018–0.05)  |
| Moderate motor plus cognitive impairment with blindness due to neonatal tetanus            | Moderate motor plus cognitive impairment with blindness              | (combined DW)                                                                                                                                                                                                                         | --                     |
| Severe motor plus cognitive impairment with blindness and epilepsy due to neonatal tetanus | Severe motor plus cognitive impairment with blindness and epilepsy   | (combined DW)                                                                                                                                                                                                                         | --                     |
| Moderate motor impairment with blindness due to neonatal tetanus                           | Moderate motor impairment with blindness                             | (combined DW)                                                                                                                                                                                                                         | --                     |
| Moderate measles                                                                           | Infectious disease, acute episode, moderate                          | has a fever and aches, and feels weak, which causes some difficulty with daily activities.                                                                                                                                            | 0.051<br>(0.032–0.074) |
| Severe measles                                                                             | Infectious disease, acute episode, severe                            | has a high fever and pain, and feels very weak, which causes great difficulty with daily activities.                                                                                                                                  | 0.133<br>(0.088–0.19)  |
| Chickenpox                                                                                 | Infectious disease, acute episode, mild                              | has a low fever and mild discomfort , but no difficulty with daily activities.                                                                                                                                                        | 0.006<br>(0.002–0.012) |
| Herpes zoster                                                                              | Herpes zoster                                                        | has a blistering skin rash that causes pain, with some burning and itching.                                                                                                                                                           | 0.058<br>(0.035–0.09)  |
| Moderate motor impairment with epilepsy due to malaria                                     | Moderate motor impairment with epilepsy                              | (combined DW)                                                                                                                                                                                                                         | --                     |
| Moderate malaria with moderate anemia                                                      | Infectious disease, acute episode, moderate, with moderate anemia    | (combined DW)                                                                                                                                                                                                                         | 0.099<br>(0.065–0.142) |
| Moderate malaria with severe anemia                                                        | Infectious disease, acute episode, moderate, with severe anemia      | (combined DW)                                                                                                                                                                                                                         | 0.192<br>(0.133–0.263) |
| Moderate motor plus cognitive impairment with epilepsy due to malaria                      | Moderate motor plus cognitive impairment with epilepsy               | (combined DW)                                                                                                                                                                                                                         | --                     |
| Severe malaria                                                                             | Infectious disease, acute episode, severe                            | has a high fever and pain, and feels very weak, which causes great difficulty with daily activities.                                                                                                                                  | 0.133<br>(0.088–0.19)  |
| Severe motor plus cognitive impairment with blindness and epilepsy due to malaria          | Severe motor plus cognitive impairment with blindness and epilepsy   | (combined DW)                                                                                                                                                                                                                         | --                     |
| Severe motor impairment due to malaria                                                     | Motor impairment, severe                                             | is unable to move around without help, and is not able to lift or hold objects, get dressed or sit upright.                                                                                                                           | 0.402<br>(0.268–0.545) |
| Moderate motor impairment due to malaria                                                   | Motor impairment, moderate                                           | has some difficulty in moving around, and difficulty in lifting and holding objects, dressing and sitting upright, but is able to walk without help.                                                                                  | 0.061<br>(0.04–0.089)  |
| Mild malaria                                                                               | Infectious disease, acute episode, mild                              | has a low fever and mild discomfort , but no difficulty with daily activities.                                                                                                                                                        | 0.006<br>(0.002–0.012) |
| Moderate malaria with mild anemia                                                          | Infectious disease, acute episode, moderate, with mild anemia        | (combined DW)                                                                                                                                                                                                                         | 0.054<br>(0.034–0.079) |
| Severe motor plus cognitive impairment with epilepsy due to malaria                        | Severe motor plus cognitive impairment with epilepsy                 | (combined DW)                                                                                                                                                                                                                         | --                     |
| Moderate malaria                                                                           | Infectious disease, acute episode, moderate                          | has a fever and aches, and feels weak, which causes some difficulty with daily activities.                                                                                                                                            | 0.051<br>(0.032–0.074) |
| Mild anemia due to malaria parasitemia (PIPR)                                              | Anemia, mild                                                         | feels slightly tired and weak at times, but this does not interfere with normal daily activities.                                                                                                                                     | 0.004<br>(0.001–0.008) |
| Moderate anemia due to malaria parasitemia (PIPR)                                          | Anemia, moderate                                                     | feels moderate fatigue, weakness, and shortness of breath after exercise, making daily activities more difficult.                                                                                                                     | 0.052<br>(0.034–0.076) |
| Severe motor plus cognitive impairment with blindness due to malaria                       | Severe motor plus cognitive impairment with blindness                | (combined DW)                                                                                                                                                                                                                         | --                     |
| Severe motor impairment with blindness due to malaria                                      | Severe motor impairment with blindness                               | (combined DW)                                                                                                                                                                                                                         | --                     |
| Severe anemia due to malaria parasitemia (PIPR)                                            | Anemia, severe                                                       | feels very weak, tired and short of breath, and has problems with activities that require physical effort or deep concentration.                                                                                                      | 0.149<br>(0.101–0.209) |
| Severe motor impairment with blindness and epilepsy due to malaria                         | Severe motor impairment with blindness and epilepsy                  | (combined DW)                                                                                                                                                                                                                         | --                     |
| Moderate motor plus cognitive impairment with blindness and epilepsy due to malaria        | Moderate motor plus cognitive impairment with blindness and epilepsy | (combined DW)                                                                                                                                                                                                                         | --                     |
| Mild malaria with severe anemia                                                            | Infectious disease, acute episode, mild, with severe anemia          | (combined DW)                                                                                                                                                                                                                         | 0.154<br>(0.105–0.214) |
| Severe motor impairment with epilepsy due to malaria                                       | Severe motor impairment with epilepsy                                | (combined DW)                                                                                                                                                                                                                         | --                     |
| Severe malaria with severe anemia                                                          | Infectious disease, acute episode, severe, with severe anemia        | (combined DW)                                                                                                                                                                                                                         | 0.262<br>(0.184–0.359) |
| Severe malaria with moderate anemia                                                        | Infectious disease, acute episode, severe, with moderate anemia      | (combined DW)                                                                                                                                                                                                                         | 0.178<br>(0.122–0.247) |
| Moderate motor impairment with blindness and epilepsy due to malaria                       | Moderate motor impairment with blindness and epilepsy                | (combined DW)                                                                                                                                                                                                                         | --                     |
| Moderate motor impairment with blindness due to malaria                                    | Moderate motor impairment with blindness                             | (combined DW)                                                                                                                                                                                                                         | --                     |
| Mild malaria with mild anemia                                                              | Infectious disease, acute episode, mild, with mild anemia            | (combined DW)                                                                                                                                                                                                                         | 0.009<br>(0.004–0.02)  |
| Severe malaria with mild anemia                                                            | Infectious disease, acute episode, severe, with mild anemia          | (combined DW)                                                                                                                                                                                                                         | 0.137<br>(0.091–0.192) |
| Asymptomatic malaria parasitemia (PIPR)                                                    | Asymptomatic                                                         | --                                                                                                                                                                                                                                    | --                     |
| Mild malaria with moderate anemia                                                          | Infectious disease, acute episode, mild, with moderate anemia        | (combined DW)                                                                                                                                                                                                                         | 0.057<br>(0.037–0.085) |
| Moderate motor plus cognitive impairment with blindness due to malaria                     | Moderate motor plus cognitive impairment with blindness              | (combined DW)                                                                                                                                                                                                                         | --                     |

**Appendix Table 6. GBD 2016 sequelae, health states, health state lay descriptions, and disability weights**

| Sequela                                                           | Health state name                                     | Health state lay description                                                                                                                                                                                                  | Disability weight      |
|-------------------------------------------------------------------|-------------------------------------------------------|-------------------------------------------------------------------------------------------------------------------------------------------------------------------------------------------------------------------------------|------------------------|
| Moderate heart failure due to Chagas disease                      | Heart failure, moderate                               | is short of breath and easily tires with minimal physical activity, such as walking only a short distance. The person feels comfortable at rest but avoids moderate activity.                                                 | 0.072<br>(0.047–0.103) |
| Atrial fibrillation and flutter due to Chagas disease             | Cardiac conduction disorders and cardiac dysrhythmias | has periods of rapid and irregular heartbeats and occasional fainting.                                                                                                                                                        | 0.224<br>(0.151–0.312) |
| Asymptomatic and mild heart failure due to Chagas disease         | Heart failure, mild                                   | is short of breath and easily tires with moderate physical activity, such as walking uphill or more than a quarter-mile on level ground. The person feels comfortable at rest or during activities requiring less effort.     | 0.041<br>(0.026–0.062) |
| Mild chronic digestive disease due to Chagas disease              | Abdominopelvic problem, mild                          | has some pain in the belly that causes nausea but does not interfere with daily activities.                                                                                                                                   | 0.011<br>(0.005–0.021) |
| Acute Chagas disease                                              | Infectious disease, acute episode, moderate           | has a fever and aches, and feels weak, which causes some difficulty with daily activities.                                                                                                                                    | 0.051<br>(0.032–0.074) |
| Severe heart failure due to Chagas disease                        | Heart failure, severe                                 | is short of breath and feels tired when at rest. The person avoids any physical activity, for fear of worsening the breathing problems.                                                                                       | 0.179<br>(0.122–0.251) |
| Asymptomatic Chagas disease                                       | Asymptomatic                                          | --                                                                                                                                                                                                                            | --                     |
| Moderate chronic digestive disease due to Chagas disease          | Abdominopelvic problem, moderate                      | has pain in the belly and feels nauseous. The person has difficulties with daily activities.                                                                                                                                  | 0.114<br>(0.078–0.159) |
| Moderate visceral leishmaniasis                                   | Infectious disease, acute episode, moderate           | has a fever and aches, and feels weak, which causes some difficulty with daily activities.                                                                                                                                    | 0.051<br>(0.032–0.074) |
| Severe visceral leishmaniasis                                     | Infectious disease, acute episode, severe             | has a high fever and pain, and feels very weak, which causes great difficulty with daily activities.                                                                                                                          | 0.133<br>(0.088–0.19)  |
| Cutaneous and mucocutaneous leishmaniasis                         | Disfigurement, level 2                                | has a visible physical deformity that causes others to stare and comment. As a result, the person is worried and has trouble sleeping and concentrating.                                                                      | 0.067<br>(0.044–0.096) |
| Sleeping sickness due to Trypanosoma brucei rhodesiense           | Disfigurement, level 1 with itch/pain                 | has a slight, visible physical deformity that is sometimes sore or itchy. Others notice the deformity, which causes some worry and discomfort.                                                                                | 0.027<br>(0.015–0.042) |
| Skin disfigurement due to Trypanosoma brucei gambiense            | Disfigurement, level 1 with itch/pain                 | has a slight, visible physical deformity that is sometimes sore or itchy. Others notice the deformity, which causes some worry and discomfort.                                                                                | 0.027<br>(0.015–0.042) |
| Skin disfigurement due to Trypanosoma brucei rhodesiense          | Motor plus cognitive impairments, severe              | cannot move around without help, and cannot lift or hold objects, get dressed or sit upright. The person also has very low intelligence, speaks few words, and needs constant supervision and help with all daily activities. | 0.542<br>(0.374–0.702) |
| Sleeping sickness due to Trypanosoma brucei gambiense             | Motor plus cognitive impairments, severe              | cannot move around without help, and cannot lift or hold objects, get dressed or sit upright. The person also has very low intelligence, speaks few words, and needs constant supervision and help with all daily activities. | 0.542<br>(0.374–0.702) |
| Mild diarrhea due to schistosomiasis                              | Diarrhea, mild                                        | has diarrhea three or more times a day with occasional discomfort in the belly.                                                                                                                                               | 0.074<br>(0.049–0.104) |
| Severe anemia due to schistosomiasis                              | Anemia, severe                                        | feels very weak, tired and short of breath, and has problems with activities that require physical effort or deep concentration.                                                                                              | 0.149<br>(0.101–0.209) |
| Hematemesis due to schistosomiasis                                | Gastric bleeding                                      | vomits blood and feels nauseous.                                                                                                                                                                                              | 0.325<br>(0.209–0.462) |
| Hepatomegaly due to schistosomiasis                               | Abdominopelvic problem, mild                          | has some pain in the belly that causes nausea but does not interfere with daily activities.                                                                                                                                   | 0.011<br>(0.005–0.021) |
| Moderate anemia due to schistosomiasis                            | Anemia, moderate                                      | feels moderate fatigue, weakness, and shortness of breath after exercise, making daily activities more difficult.                                                                                                             | 0.052<br>(0.034–0.076) |
| Mild anemia due to schistosomiasis                                | Anemia, mild                                          | feels slightly tired and weak at times, but this does not interfere with normal daily activities.                                                                                                                             | 0.004<br>(0.001–0.008) |
| Hydronephrosis due to schistosomiasis                             | Abdominopelvic problem, mild                          | has some pain in the belly that causes nausea but does not interfere with daily activities.                                                                                                                                   | 0.011<br>(0.005–0.021) |
| Ascites due to schistosomiasis                                    | Abdominopelvic problem, moderate                      | has pain in the belly and feels nauseous. The person has difficulties with daily activities.                                                                                                                                  | 0.114<br>(0.078–0.159) |
| Mild schistosomiasis                                              | Infectious disease, acute episode, mild               | has a low fever and mild discomfort, but no difficulty with daily activities.                                                                                                                                                 | 0.006<br>(0.002–0.012) |
| Dysuria due to schistosomiasis                                    | Abdominopelvic problem, mild                          | has some pain in the belly that causes nausea but does not interfere with daily activities.                                                                                                                                   | 0.011<br>(0.005–0.021) |
| Bladder pathology due to schistosomiasis                          | Abdominopelvic problem, mild                          | has some pain in the belly that causes nausea but does not interfere with daily activities.                                                                                                                                   | 0.011<br>(0.005–0.021) |
| Neurocysticercosis with epilepsy                                  | Epilepsy                                              | (combined DW)                                                                                                                                                                                                                 | --                     |
| Abdominal problems due to cystic echinococcosis                   | Abdominopelvic problem, moderate                      | has pain in the belly and feels nauseous. The person has difficulties with daily activities.                                                                                                                                  | 0.114<br>(0.078–0.159) |
| Epilepsy due to echinococcosis                                    | Epilepsy                                              | (combined DW)                                                                                                                                                                                                                 | --                     |
| Chronic respiratory disease due to cystic echinococcosis          | COPD and other chronic respiratory problems, mild     | has cough and shortness of breath after heavy physical activity, but is able to walk long distances and climb stairs.                                                                                                         | 0.019<br>(0.011–0.033) |
| Lymphedema due to lymphatic filariasis                            | Lymphatic filariasis, symptomatic                     | has swollen legs with hard and thick skin, which causes difficulty in moving around.                                                                                                                                          | 0.109<br>(0.073–0.154) |
| Hydrocele due to lymphatic filariasis                             | Epididymo-orchitis                                    | has swelling and tenderness in the testicles and pain during urination.                                                                                                                                                       | 0.128<br>(0.086–0.18)  |
| Acute adenolymphangitis due to lymphatic filariasis               | Infectious disease, acute episode, moderate           | has a fever and aches, and feels weak, which causes some difficulty with daily activities.                                                                                                                                    | 0.051<br>(0.032–0.074) |
| Prevalence of detectable microfilaria due to lymphatic filariasis | Asymptomatic                                          | --                                                                                                                                                                                                                            | --                     |
| Mild skin disease due to onchocerciasis                           | Disfigurement, level 1 with itch/pain                 | has a slight, visible physical deformity that is sometimes sore or itchy. Others notice the deformity, which causes some worry and discomfort.                                                                                | 0.027<br>(0.015–0.042) |

**Appendix Table 6. GBD 2016 sequelae, health states, health state lay descriptions, and disability weights**

| Sequela                                                          | Health state name                                                                   | Health state lay description                                                                                                                                                   | Disability weight      |
|------------------------------------------------------------------|-------------------------------------------------------------------------------------|--------------------------------------------------------------------------------------------------------------------------------------------------------------------------------|------------------------|
| Severe vision impairment due to onchocerciasis                   | Distance vision, severe impairment                                                  | has severe vision loss, which causes difficulty in daily activities, some emotional impact (for example worry), and some difficulty going outside the home without assistance. | 0.184<br>(0.125–0.258) |
| Moderate vision impairment due to onchocerciasis                 | Distance vision, moderate impairment                                                | has vision problems that make it difficult to recognize faces or objects across a room.                                                                                        | 0.031<br>(0.019–0.049) |
| Asymptomatic onchocerciasis                                      | Asymptomatic                                                                        | --                                                                                                                                                                             | --                     |
| Severe skin disease without itch due to onchocerciasis           | Disfigurement, level 3                                                              | has an obvious physical deformity that makes others uncomfortable, which causes the person to avoid social contact, feel worried, sleep poorly, and think about suicide.       | 0.405<br>(0.275–0.546) |
| Severe skin disease due to onchocerciasis                        | Disfigurement, level 2, with itch/pain                                              | has a visible physical deformity that is sore and itchy. Other people stare and comment, which causes the person to worry. The person has trouble sleeping and concentrating.  | 0.188<br>(0.125–0.267) |
| Blindness due to onchocerciasis                                  | Distance vision blindness                                                           | is completely blind, which causes great difficulty in some daily activities, worry and anxiety, and great difficulty going outside the home without assistance.                | 0.187<br>(0.124–0.26)  |
| Mild skin disease without itch due to onchocerciasis             | Disfigurement, level 1                                                              | has a slight, visible physical deformity that others notice, which causes some worry and discomfort.                                                                           | 0.011<br>(0.005–0.021) |
| Moderate skin disease due to onchocerciasis                      | Disfigurement, level 2, with itch/pain                                              | has a visible physical deformity that is sore and itchy. Other people stare and comment, which causes the person to worry. The person has trouble sleeping and concentrating.  | 0.188<br>(0.125–0.267) |
| Blindness due to trachoma                                        | Distance vision blindness                                                           | is completely blind, which causes great difficulty in some daily activities, worry and anxiety, and great difficulty going outside the home without assistance.                | 0.187<br>(0.124–0.26)  |
| Severe vision impairment due to trachoma                         | Distance vision, severe impairment                                                  | has severe vision loss, which causes difficulty in daily activities, some emotional impact (for example worry), and some difficulty going outside the home without assistance. | 0.184<br>(0.125–0.258) |
| Moderate vision impairment due to trachoma                       | Distance vision, moderate impairment                                                | has vision problems that make it difficult to recognize faces or objects across a room.                                                                                        | 0.031<br>(0.019–0.049) |
| Severe dengue                                                    | Infectious disease, acute episode, severe                                           | has a high fever and pain, and feels very weak, which causes great difficulty with daily activities.                                                                           | 0.133<br>(0.088–0.19)  |
| Post-dengue chronic fatigue syndrome                             | Infectious disease, post-acute consequences (fatigue, emotional lability, insomnia) | is always tired and easily upset. The person feels pain all over the body and is depressed.                                                                                    | 0.219<br>(0.148–0.308) |
| Moderate dengue                                                  | Infectious disease, acute episode, moderate                                         | has a fever and aches, and feels weak, which causes some difficulty with daily activities.                                                                                     | 0.051<br>(0.032–0.074) |
| Asymptomatic yellow fever                                        | Asymptomatic                                                                        | --                                                                                                                                                                             | --                     |
| Moderate yellow fever                                            | Infectious disease, acute episode, moderate                                         | has a fever and aches, and feels weak, which causes some difficulty with daily activities.                                                                                     | 0.051<br>(0.032–0.074) |
| Severe yellow fever                                              | Infectious disease, acute episode, severe                                           | has a high fever and pain, and feels very weak, which causes great difficulty with daily activities.                                                                           | 0.133<br>(0.088–0.19)  |
| Rabies                                                           | Infectious disease, acute episode, severe                                           | has a high fever and pain, and feels very weak, which causes great difficulty with daily activities.                                                                           | 0.133<br>(0.088–0.19)  |
| Severe wasting due to ascariasis                                 | Severe wasting                                                                      | is extremely skinny and has no energy.                                                                                                                                         | 0.128<br>(0.082–0.183) |
| Asymptomatic ascariasis                                          | Asymptomatic                                                                        | --                                                                                                                                                                             | --                     |
| Heavy infestation of ascariasis                                  | Intestinal nematode infections, symptomatic                                         | has cramping pain and a bloated feeling in the belly.                                                                                                                          | 0.027<br>(0.015–0.043) |
| Mild abdominopelvic problems due to ascariasis                   | Abdominopelvic problem, mild                                                        | has some pain in the belly that causes nausea but does not interfere with daily activities.                                                                                    | 0.011<br>(0.005–0.021) |
| Heavy infestation of trichuriasis                                | Intestinal nematode infections, symptomatic                                         | has cramping pain and a bloated feeling in the belly.                                                                                                                          | 0.027<br>(0.015–0.043) |
| Severe wasting due to trichuriasis                               | Severe wasting                                                                      | is extremely skinny and has no energy.                                                                                                                                         | 0.128<br>(0.082–0.183) |
| Mild abdominopelvic problems due to trichuriasis                 | Abdominopelvic problem, mild                                                        | has some pain in the belly that causes nausea but does not interfere with daily activities.                                                                                    | 0.011<br>(0.005–0.021) |
| Asymptomatic trichuriasis                                        | Asymptomatic                                                                        | --                                                                                                                                                                             | --                     |
| Mild anemia due to hookworm disease                              | Anemia, mild                                                                        | feels slightly tired and weak at times, but this does not interfere with normal daily activities.                                                                              | 0.004<br>(0.001–0.008) |
| Severe anemia due to hookworm disease                            | Anemia, severe                                                                      | feels very weak, tired and short of breath, and has problems with activities that require physical effort or deep concentration.                                               | 0.149<br>(0.101–0.209) |
| Asymptomatic hookworm disease                                    | Asymptomatic                                                                        | --                                                                                                                                                                             | --                     |
| Mild abdominopelvic problems due to hookworm disease             | Abdominopelvic problem, mild                                                        | has some pain in the belly that causes nausea but does not interfere with daily activities.                                                                                    | 0.011<br>(0.005–0.021) |
| Severe wasting due to hookworm disease                           | Severe wasting                                                                      | is extremely skinny and has no energy.                                                                                                                                         | 0.128<br>(0.082–0.183) |
| Heavy infestation of hookworm                                    | Intestinal nematode infections, symptomatic                                         | has cramping pain and a bloated feeling in the belly.                                                                                                                          | 0.027<br>(0.015–0.043) |
| Moderate anemia due to hookworm disease                          | Anemia, moderate                                                                    | feels moderate fatigue, weakness, and shortness of breath after exercise, making daily activities more difficult.                                                              | 0.052<br>(0.034–0.076) |
| Asymptomatic fascioliasis                                        | Asymptomatic                                                                        | --                                                                                                                                                                             | --                     |
| Heavy clonorchiasis due to food-borne trematodiasis              | Abdominopelvic problem, moderate                                                    | has pain in the belly and feels nauseous. The person has difficulties with daily activities.                                                                                   | 0.114<br>(0.078–0.159) |
| Heavy fascioliasis due to food-borne trematodiasis               | Abdominopelvic problem, moderate                                                    | has pain in the belly and feels nauseous. The person has difficulties with daily activities.                                                                                   | 0.114<br>(0.078–0.159) |
| Heavy intestinal fluke infection due to food-borne trematodiasis | Abdominopelvic problem, moderate                                                    | has pain in the belly and feels nauseous. The person has difficulties with daily activities.                                                                                   | 0.114<br>(0.078–0.159) |
| Asymptomatic opisthorchiasis                                     | Asymptomatic                                                                        | --                                                                                                                                                                             | --                     |



**Appendix Table 6. GBD 2016 sequelae, health states, health state lay descriptions, and disability weights**

| Sequela                                                  | Health state name                                                                     | Health state lay description                                                                                                                                                    | Disability weight      |
|----------------------------------------------------------|---------------------------------------------------------------------------------------|---------------------------------------------------------------------------------------------------------------------------------------------------------------------------------|------------------------|
| Asymptomatic intestinal fluke infection                  | Asymptomatic                                                                          | --                                                                                                                                                                              | --                     |
| Cerebral paragonimiasis                                  | Epilepsy                                                                              | (combined DW)                                                                                                                                                                   | --                     |
| Asymptomatic paragonimiasis                              | Asymptomatic                                                                          | --                                                                                                                                                                              | --                     |
| Moderate paragonimiasis due to food-borne trematodiasis  | COPD and other chronic respiratory problems, moderate                                 | has cough, wheezing and shortness of breath, even after light physical activity. The person feels tired and can walk only short distances or climb only a few stairs.           | 0.225<br>(0.153–0.31)  |
| Severe paragonimiasis due to food-borne trematodiasis    | COPD and other chronic respiratory problems, severe                                   | has cough, wheezing and shortness of breath all the time. The person has great difficulty walking even short distances or climbing any stairs, feels tired when at rest, and is | 0.408<br>(0.273–0.556) |
| Mild paragonimiasis due to food-borne trematodiasis      | COPD and other chronic respiratory problems, mild                                     | has cough and shortness of breath after heavy physical activity, but is able to walk long distances and climb stairs.                                                           | 0.019<br>(0.011–0.033) |
| Heavy opisthorchiasis due to food-borne trematodiasis    | Abdominopelvic problem, moderate                                                      | has pain in the belly and feels nauseous. The person has difficulties with daily activities.                                                                                    | 0.114<br>(0.078–0.159) |
| Asymptomatic clonorchiasis                               | Asymptomatic                                                                          | --                                                                                                                                                                              | --                     |
| Disfigurement level 2 due to leprosy                     | Disfigurement, level 2                                                                | has a visible physical deformity that causes others to stare and comment. As a result, the person is worried and has trouble sleeping and concentrating.                        | 0.067<br>(0.044–0.096) |
| Disfigurement level 1 due to leprosy                     | Disfigurement, level 1                                                                | has a slight, visible physical deformity that others notice, which causes some worry and discomfort.                                                                            | 0.011<br>(0.005–0.021) |
| Post-Ebola chronic fatigue syndrome                      | Infectious disease, post-acute consequences (fatigue, emotional lability, insomnia)   | is always tired and easily upset. The person feels pain all over the body and is depressed.                                                                                     | 0.219<br>(0.148–0.308) |
| Ebola cases                                              | Infectious disease, acute episode, severe                                             | has a high fever and pain, and feels very weak, which causes great difficulty with daily activities.                                                                            | 0.133<br>(0.088–0.19)  |
| Guillain–Barré syndrome due to Zika infection            | Spinal cord lesion below neck level (treated)                                         | is paralyzed from the waist down, cannot feel or move the legs and has difficulties with urine and bowel control. The person uses a wheelchair to move around.                  | 0.296<br>(0.198–0.414) |
| Asymptomatic Zika infection                              | Asymptomatic                                                                          | --                                                                                                                                                                              | --                     |
| Acute Zika infection                                     | Infectious disease, acute episode, moderate                                           | has a fever and aches, and feels weak, which causes some difficulty with daily activities.                                                                                      | 0.051<br>(0.032–0.074) |
| Congenital Zika syndrome                                 | Severe motor plus cognitive impairment with epilepsy                                  | (combined DW)                                                                                                                                                                   | --                     |
| Mild pain due to Guinea worm emergence                   | Disfigurement, level 1 with itch/pain                                                 | has a slight, visible physical deformity that is sometimes sore or itchy. Others notice the deformity, which causes some worry and discomfort.                                  | 0.027<br>(0.015–0.042) |
| Moderate pain due to Guinea worm emergence               | Disfigurement, level 2, with itch/pain                                                | has a visible physical deformity that is sore and itchy. Other people stare and comment, which causes the person to worry. The person has trouble sleeping and concentrating.   | 0.188<br>(0.125–0.267) |
| Moderate reduced mobility due to Guinea worm emergence   | Musculoskeletal problems, lower limbs, moderate                                       | has moderate pain in the leg, which makes the person limp, and causes some difficulty walking, standing, lifting and carrying heavy things, getting up and down and sleeping.   | 0.079<br>(0.054–0.11)  |
| Mild anemia due to other neglected tropical diseases     | Anemia, mild                                                                          | feels slightly tired and weak at times, but this does not interfere with normal daily activities.                                                                               | 0.004<br>(0.001–0.008) |
| Moderate anemia due to other neglected tropical diseases | Anemia, moderate                                                                      | feels moderate fatigue, weakness, and shortness of breath after exercise, making daily activities more difficult.                                                               | 0.052<br>(0.034–0.076) |
| Acute infection due to other neglected tropical diseases | Post-COMO calculation for residuals (YLL/YLD ratio, other methods)                    | --                                                                                                                                                                              | --                     |
| Severe anemia due to other neglected tropical diseases   | Anemia, severe                                                                        | feels very weak, tired and short of breath, and has problems with activities that require physical effort or deep concentration.                                                | 0.149<br>(0.101–0.209) |
| Mild anemia due to maternal hemorrhage                   | Anemia, mild                                                                          | feels slightly tired and weak at times, but this does not interfere with normal daily activities.                                                                               | 0.004<br>(0.001–0.008) |
| Moderate anemia due to maternal hemorrhage               | Anemia, moderate                                                                      | feels moderate fatigue, weakness, and shortness of breath after exercise, making daily activities more difficult.                                                               | 0.052<br>(0.034–0.076) |
| Severe anemia due to maternal hemorrhage                 | Anemia, severe                                                                        | feels very weak, tired and short of breath, and has problems with activities that require physical effort or deep concentration.                                                | 0.149<br>(0.101–0.209) |
| Maternal hemorrhage (> 1L blood lost)                    | Abdominopelvic problem, severe                                                        | has severe pain in the belly and feels nauseous. The person is anxious and unable to carry out daily activities.                                                                | 0.324<br>(0.22–0.442)  |
| Maternal hemorrhage (< 1L blood lost)                    | Abdominopelvic problem, moderate                                                      | has pain in the belly and feels nauseous. The person has difficulties with daily activities.                                                                                    | 0.114<br>(0.078–0.159) |
| Puerperal sepsis                                         | Infectious disease, acute episode, severe                                             | has a high fever and pain, and feels very weak, which causes great difficulty with daily activities.                                                                            | 0.133<br>(0.088–0.19)  |
| Other maternal infections                                | Infectious disease, acute episode, moderate                                           | has a fever and aches, and feels weak, which causes some difficulty with daily activities.                                                                                      | 0.051<br>(0.032–0.074) |
| Infertility due to puerperal sepsis                      | Infertility, secondary                                                                | has at least one child, and wants to have more children. The person has a fertile partner, but the couple cannot conceive.                                                      | 0.005<br>(0.002–0.011) |
| Other hypertensive disorders of pregnancy                | Generic uncomplicated disease: worry and daily medication                             | has a chronic disease that requires medication every day and causes some worry but minimal interference with daily activities.                                                  | 0.049<br>(0.031–0.072) |
| Long term sequelae of severe pre-eclampsia               | Tension-type headaches, mild motor plus cognitive impairment                          | (combined DW)                                                                                                                                                                   | --                     |
| Long term sequelae of eclampsia                          | Tension-type headaches, mild motor plus cognitive impairment                          | (combined DW)                                                                                                                                                                   | --                     |
| Severe pre-eclampsia                                     | Moderate abdominal pain, tension-type headaches, mild motor plus cognitive impairment | (combined DW)                                                                                                                                                                   | --                     |
| Eclampsia                                                | Moderate abdominal pain and severe epilepsy                                           | (combined DW)                                                                                                                                                                   | --                     |
| Obstructed labor, acute event                            | Abdominopelvic problem, severe                                                        | has severe pain in the belly and feels nauseous. The person is anxious and unable to carry out daily activities.                                                                | 0.324<br>(0.22–0.442)  |

**Appendix Table 6. GBD 2016 sequelae, health states, health state lay descriptions, and disability weights**

| Sequela                                                                                                                   | Health state name                                                    | Health state lay description                                                                                                                                                                                                          | Disability weight      |
|---------------------------------------------------------------------------------------------------------------------------|----------------------------------------------------------------------|---------------------------------------------------------------------------------------------------------------------------------------------------------------------------------------------------------------------------------------|------------------------|
| Vesicovaginal fistula                                                                                                     | Vesicovaginal fistula                                                | has an abnormal opening between the bladder and the vagina, which makes her unable to control urinating. The woman is anxious and depressed.                                                                                          | 0.342<br>(0.227–0.478) |
| Rectovaginal fistula                                                                                                      | Rectovaginal fistula                                                 | has an abnormal opening between her vagina and rectum causing flatulence and feces to escape through the vagina. The person gets infections in her vagina, and has pain when urinating.                                               | 0.501<br>(0.339–0.657) |
| Ectopic Pregnancy                                                                                                         | Abdominopelvic problem, moderate                                     | has pain in the belly and feels nauseous. The person has difficulties with daily activities.                                                                                                                                          | 0.114<br>(0.078–0.159) |
| Maternal abortive outcome                                                                                                 | Abdominopelvic problem, moderate                                     | has pain in the belly and feels nauseous. The person has difficulties with daily activities.                                                                                                                                          | 0.114<br>(0.078–0.159) |
| Other maternal disorders                                                                                                  | Post-COMO calculation for residuals (YLL/YLD ratio, other methods)   | --                                                                                                                                                                                                                                    | --                     |
| Severe motor plus cognitive impairment with epilepsy due to neonatal preterm birth complications <28wks                   | Severe motor plus cognitive impairment with epilepsy                 | (combined DW)                                                                                                                                                                                                                         | --                     |
| Severe motor plus cognitive impairment with epilepsy due to neonatal preterm birth complications 32-36wks                 | Severe motor plus cognitive impairment with epilepsy                 | (combined DW)                                                                                                                                                                                                                         | --                     |
| Severe motor plus cognitive impairment with epilepsy due to neonatal preterm birth complications 28-32wks                 | Severe motor plus cognitive impairment with epilepsy                 | (combined DW)                                                                                                                                                                                                                         | --                     |
| Mild motor plus cognitive impairments due to neonatal preterm birth complications <28wks                                  | Motor plus cognitive impairments, mild                               | has some difficulty in moving around but is able to walk without help. The person is slow in learning at school. As an adult, the person has some difficulty doing complex or unfamiliar tasks but otherwise functions independently. | 0.031<br>(0.018–0.05)  |
| Severe motor plus cognitive impairment with blindness and epilepsy due to neonatal preterm birth complications <28wks     | Severe motor plus cognitive impairment with blindness and epilepsy   | (combined DW)                                                                                                                                                                                                                         | --                     |
| Mild motor plus cognitive impairments due to neonatal preterm birth complications 32-36wks                                | Motor plus cognitive impairments, mild                               | has some difficulty in moving around but is able to walk without help. The person is slow in learning at school. As an adult, the person has some difficulty doing complex or unfamiliar tasks but otherwise functions independently. | 0.031<br>(0.018–0.05)  |
| Severe motor plus cognitive impairment with blindness due to neonatal preterm birth complications <28wks                  | Severe motor plus cognitive impairment with blindness                | (combined DW)                                                                                                                                                                                                                         | --                     |
| Moderate motor plus cognitive impairment with blindness and epilepsy due to neonatal preterm birth complications <28wks   | Moderate motor plus cognitive impairment with blindness and epilepsy | (combined DW)                                                                                                                                                                                                                         | --                     |
| Moderate motor plus cognitive impairment with blindness and epilepsy due to neonatal preterm birth complications 32-36wks | Moderate motor plus cognitive impairment with blindness and epilepsy | (combined DW)                                                                                                                                                                                                                         | --                     |
| Severe motor plus cognitive impairment with blindness and epilepsy due to neonatal preterm birth complications 28-32wks   | Severe motor plus cognitive impairment with blindness and epilepsy   | (combined DW)                                                                                                                                                                                                                         | --                     |
| Mild motor plus cognitive impairments due to neonatal preterm birth complications 28-32wks                                | Motor plus cognitive impairments, mild                               | has some difficulty in moving around but is able to walk without help. The person is slow in learning at school. As an adult, the person has some difficulty doing complex or unfamiliar tasks but otherwise functions independently. | 0.031<br>(0.018–0.05)  |
| Severe motor impairment with epilepsy due to neonatal preterm birth complications 32-36wks                                | Severe motor impairment with epilepsy                                | (combined DW)                                                                                                                                                                                                                         | --                     |
| Severe motor impairment due to neonatal preterm birth complications 32-36wks                                              | Motor impairment, severe                                             | is unable to move around without help, and is not able to lift or hold objects, get dressed or sit upright.                                                                                                                           | 0.402<br>(0.268–0.545) |
| Severe motor plus cognitive impairment with blindness due to neonatal preterm birth complications 32-36wks                | Severe motor plus cognitive impairment with blindness                | (combined DW)                                                                                                                                                                                                                         | --                     |
| Severe motor impairment with epilepsy due to neonatal preterm birth complications <28wks                                  | Severe motor impairment with epilepsy                                | (combined DW)                                                                                                                                                                                                                         | --                     |
| Severe motor impairment with blindness due to neonatal preterm birth complications 32-36wks                               | Severe motor impairment with blindness                               | (combined DW)                                                                                                                                                                                                                         | --                     |
| Severe motor impairment with epilepsy due to neonatal preterm birth complications 28-32wks                                | Severe motor impairment with epilepsy                                | (combined DW)                                                                                                                                                                                                                         | --                     |
| Mild motor impairment due to neonatal preterm birth complications <28wks                                                  | Motor impairment, mild                                               | has some difficulty in moving around but is able to walk without help.                                                                                                                                                                | 0.01<br>(0.005–0.019)  |
| Mild motor impairment due to neonatal preterm birth complications 28-32wks                                                | Motor impairment, mild                                               | has some difficulty in moving around but is able to walk without help.                                                                                                                                                                | 0.01<br>(0.005–0.019)  |
| Mild motor impairment due to neonatal preterm birth complications 32-36wks                                                | Motor impairment, mild                                               | has some difficulty in moving around but is able to walk without help.                                                                                                                                                                | 0.01<br>(0.005–0.019)  |
| Severe motor impairment with blindness due to neonatal preterm birth complications <28wks                                 | Severe motor impairment with blindness                               | (combined DW)                                                                                                                                                                                                                         | --                     |
| Severe motor impairment due to neonatal preterm birth complications 28-32wks                                              | Motor impairment, severe                                             | is unable to move around without help, and is not able to lift or hold objects, get dressed or sit upright.                                                                                                                           | 0.402<br>(0.268–0.545) |
| Severe motor impairment with blindness and epilepsy due to neonatal preterm birth complications <28wks                    | Severe motor impairment with blindness and epilepsy                  | (combined DW)                                                                                                                                                                                                                         | --                     |
| Moderate motor impairment due to neonatal preterm birth complications 28-32wks                                            | Motor impairment, moderate                                           | has some difficulty in moving around, and difficulty in lifting and holding objects, dressing and sitting upright, but is able to walk without help.                                                                                  | 0.061<br>(0.04–0.089)  |
| Moderate motor impairment due to neonatal preterm birth complications <28wks                                              | Motor impairment, moderate                                           | has some difficulty in moving around, and difficulty in lifting and holding objects, dressing and sitting upright, but is able to walk without help.                                                                                  | 0.061<br>(0.04–0.089)  |
| Moderate motor impairment due to neonatal preterm birth complications 32-36wks                                            | Motor impairment, moderate                                           | has some difficulty in moving around, and difficulty in lifting and holding objects, dressing and sitting upright, but is able to walk without help.                                                                                  | 0.061<br>(0.04–0.089)  |
| Severe motor impairment with blindness due to neonatal preterm birth complications 28-32wks                               | Severe motor impairment with blindness                               | (combined DW)                                                                                                                                                                                                                         | --                     |
| Severe motor impairment with blindness and epilepsy due to neonatal preterm birth complications 32-36wks                  | Severe motor impairment with blindness and epilepsy                  | (combined DW)                                                                                                                                                                                                                         | --                     |
| Severe motor plus cognitive impairment with blindness due to neonatal preterm birth complications 28-32wks                | Severe motor plus cognitive impairment with blindness                | (combined DW)                                                                                                                                                                                                                         | --                     |

| Appendix Table 6. GBD 2016 sequelae, health states, health state lay descriptions, and disability weights                            |                                                                      |                                                                                                                                                                                                                                       |                        |
|--------------------------------------------------------------------------------------------------------------------------------------|----------------------------------------------------------------------|---------------------------------------------------------------------------------------------------------------------------------------------------------------------------------------------------------------------------------------|------------------------|
| Sequela                                                                                                                              | Health state name                                                    | Health state lay description                                                                                                                                                                                                          | Disability weight      |
| Severe motor impairment due to neonatal preterm birth complications <28wks                                                           | Motor impairment, severe                                             | is unable to move around without help, and is not able to lift or hold objects, get dressed or sit upright.                                                                                                                           | 0.402<br>(0.268–0.545) |
| Severe motor impairment with blindness and epilepsy due to neonatal preterm birth complications 28–32wks                             | Severe motor impairment with blindness and epilepsy                  | (combined DW)                                                                                                                                                                                                                         | --                     |
| Moderate motor plus cognitive impairment with epilepsy due to neonatal preterm birth complications 28–32wks                          | Moderate motor plus cognitive impairment with epilepsy               | (combined DW)                                                                                                                                                                                                                         | --                     |
| Blindness due to retinopathy of prematurity                                                                                          | Distance vision blindness                                            | is completely blind, which causes great difficulty in some daily activities, worry and anxiety, and great difficulty going outside the home without assistance.                                                                       | 0.187<br>(0.124–0.26)  |
| Severe motor plus cognitive impairment with blindness and epilepsy due to neonatal preterm birth complications 32–36wks              | Severe motor plus cognitive impairment with blindness and epilepsy   | (combined DW)                                                                                                                                                                                                                         | --                     |
| Moderate motor impairment with blindness and epilepsy due to neonatal preterm birth complications 32–36wks                           | Moderate motor impairment with blindness and epilepsy                | (combined DW)                                                                                                                                                                                                                         | --                     |
| Moderate motor impairment with blindness and epilepsy due to neonatal preterm birth complications 28–32wks                           | Moderate motor impairment with blindness and epilepsy                | (combined DW)                                                                                                                                                                                                                         | --                     |
| Moderate motor impairment with epilepsy due to neonatal preterm birth complications <28wks                                           | Moderate motor impairment with epilepsy                              | (combined DW)                                                                                                                                                                                                                         | --                     |
| Moderate motor impairment with epilepsy due to neonatal preterm birth complications 28–32wks                                         | Moderate motor impairment with epilepsy                              | (combined DW)                                                                                                                                                                                                                         | --                     |
| Moderate motor impairment with blindness and epilepsy due to neonatal preterm birth complications <28wks                             | Moderate motor impairment with blindness and epilepsy                | (combined DW)                                                                                                                                                                                                                         | --                     |
| Moderate motor impairment with epilepsy due to neonatal preterm birth complications 32–36wks                                         | Moderate motor impairment with epilepsy                              | (combined DW)                                                                                                                                                                                                                         | --                     |
| Moderate motor plus cognitive impairment with blindness due to neonatal preterm birth complications 28–32wks                         | Moderate motor plus cognitive impairment with blindness              | (combined DW)                                                                                                                                                                                                                         | --                     |
| Moderate motor impairment with blindness due to neonatal preterm birth complications 32–36wks                                        | Moderate motor impairment with blindness                             | (combined DW)                                                                                                                                                                                                                         | --                     |
| Moderate motor impairment with blindness due to neonatal preterm birth complications 28–32wks                                        | Moderate motor impairment with blindness                             | (combined DW)                                                                                                                                                                                                                         | --                     |
| Moderate motor impairment with blindness due to neonatal preterm birth complications <28wks                                          | Moderate motor impairment with blindness                             | (combined DW)                                                                                                                                                                                                                         | --                     |
| Moderate motor plus cognitive impairment with blindness due to neonatal preterm birth complications <28wks                           | Moderate motor plus cognitive impairment with blindness              | (combined DW)                                                                                                                                                                                                                         | --                     |
| Moderate motor plus cognitive impairment with blindness due to neonatal preterm birth complications 32–36wks                         | Moderate motor plus cognitive impairment with blindness              | (combined DW)                                                                                                                                                                                                                         | --                     |
| Asymptomatic neonatal preterm birth 32–<37wks                                                                                        | Asymptomatic                                                         | --                                                                                                                                                                                                                                    | --                     |
| Moderate motor plus cognitive impairment with blindness and epilepsy due to neonatal preterm birth complications 28–32wks            | Moderate motor plus cognitive impairment with blindness and epilepsy | (combined DW)                                                                                                                                                                                                                         | --                     |
| Severe vision impairment due to retinopathy of prematurity                                                                           | Distance vision, severe impairment                                   | has severe vision loss, which causes difficulty in daily activities, some emotional impact (for example worry), and some difficulty going outside the home without assistance.                                                        | 0.184<br>(0.125–0.258) |
| Moderate motor plus cognitive impairment with epilepsy due to neonatal preterm birth complications <28wks                            | Moderate motor plus cognitive impairment with epilepsy               | (combined DW)                                                                                                                                                                                                                         | --                     |
| Mild vision impairment due to retinopathy of prematurity                                                                             | Distance vision, mild impairment                                     | has some difficulty with distance vision, for example reading signs, but no other problems with eyesight.                                                                                                                             | 0.003<br>(0.001–0.007) |
| Moderate vision impairment due to retinopathy of prematurity                                                                         | Distance vision, moderate impairment                                 | has vision problems that make it difficult to recognize faces or objects across a room.                                                                                                                                               | 0.031<br>(0.019–0.049) |
| Moderate motor plus cognitive impairment with epilepsy due to neonatal preterm birth complications 32–36wks                          | Moderate motor plus cognitive impairment with epilepsy               | (combined DW)                                                                                                                                                                                                                         | --                     |
| Asymptomatic neonatal preterm birth <28wks                                                                                           | Asymptomatic                                                         | --                                                                                                                                                                                                                                    | --                     |
| Asymptomatic neonatal preterm birth 28–<32 wks                                                                                       | Asymptomatic                                                         | --                                                                                                                                                                                                                                    | --                     |
| Asymptomatic retinopathy of prematurity                                                                                              | Asymptomatic                                                         | --                                                                                                                                                                                                                                    | --                     |
| Severe motor impairment due to neonatal encephalopathy due to birth asphyxia and trauma                                              | Motor impairment, severe                                             | is unable to move around without help, and is not able to lift or hold objects, get dressed or sit upright.                                                                                                                           | 0.402<br>(0.268–0.545) |
| Moderate motor impairment due to neonatal encephalopathy due to birth asphyxia and trauma                                            | Motor impairment, moderate                                           | has some difficulty in moving around, and difficulty in lifting and holding objects, dressing and sitting upright, but is able to walk without help.                                                                                  | 0.061<br>(0.04–0.089)  |
| Moderate motor impairment with blindness due to neonatal encephalopathy due to birth asphyxia and trauma                             | Moderate motor impairment with blindness                             | (combined DW)                                                                                                                                                                                                                         | --                     |
| Severe motor plus cognitive impairment with epilepsy due to neonatal encephalopathy due to birth asphyxia and trauma                 | Severe motor plus cognitive impairment with epilepsy                 | (combined DW)                                                                                                                                                                                                                         | --                     |
| Moderate motor impairment with epilepsy due to neonatal encephalopathy due to birth asphyxia and trauma                              | Moderate motor impairment with epilepsy                              | (combined DW)                                                                                                                                                                                                                         | --                     |
| Moderate motor plus cognitive impairment with blindness and epilepsy due to neonatal encephalopathy due to birth asphyxia and trauma | Moderate motor plus cognitive impairment with blindness and epilepsy | (combined DW)                                                                                                                                                                                                                         | --                     |
| Mild motor impairment due to neonatal encephalopathy due to birth asphyxia and trauma                                                | Motor impairment, mild                                               | has some difficulty in moving around but is able to walk without help.                                                                                                                                                                | 0.01<br>(0.005–0.019)  |
| Moderate motor plus cognitive impairment with epilepsy due to neonatal encephalopathy due to birth asphyxia and trauma               | Moderate motor plus cognitive impairment with epilepsy               | (combined DW)                                                                                                                                                                                                                         | --                     |
| Severe motor impairment with blindness and epilepsy due to neonatal encephalopathy due to birth asphyxia and trauma                  | Severe motor impairment with blindness and epilepsy                  | (combined DW)                                                                                                                                                                                                                         | --                     |
| Mild motor plus cognitive impairments due to neonatal encephalopathy due to birth asphyxia and trauma                                | Motor plus cognitive impairments, mild                               | has some difficulty in moving around but is able to walk without help. The person is slow in learning at school. As an adult, the person has some difficulty doing complex or unfamiliar tasks but otherwise functions independently. | 0.031<br>(0.018–0.05)  |
| Severe motor plus cognitive impairment with blindness and epilepsy due to neonatal encephalopathy due to birth asphyxia and trauma   | Severe motor plus cognitive impairment with blindness and epilepsy   | (combined DW)                                                                                                                                                                                                                         | --                     |

**Appendix Table 6. GBD 2016 sequelae, health states, health state lay descriptions, and disability weights**

| Sequela                                                                                                                   | Health state name                                                    | Health state lay description                                                                                                                                                                                                          | Disability weight      |
|---------------------------------------------------------------------------------------------------------------------------|----------------------------------------------------------------------|---------------------------------------------------------------------------------------------------------------------------------------------------------------------------------------------------------------------------------------|------------------------|
| Moderate motor impairment with blindness and epilepsy due to neonatal encephalopathy due to birth asphyxia and trauma     | Moderate motor impairment with blindness and epilepsy                | (combined DW)                                                                                                                                                                                                                         | --                     |
| Asymptomatic neonatal encephalopathy due to birth asphyxia and trauma                                                     | Asymptomatic                                                         | --                                                                                                                                                                                                                                    | --                     |
| Moderate motor plus cognitive impairment with blindness due to neonatal encephalopathy due to birth asphyxia and trauma   | Moderate motor plus cognitive impairment with blindness              | (combined DW)                                                                                                                                                                                                                         | --                     |
| Severe motor impairment with epilepsy due to neonatal encephalopathy due to birth asphyxia and trauma                     | Severe motor impairment with epilepsy                                | (combined DW)                                                                                                                                                                                                                         | --                     |
| Severe motor plus cognitive impairment with blindness due to neonatal encephalopathy due to birth asphyxia and trauma     | Severe motor plus cognitive impairment with blindness                | (combined DW)                                                                                                                                                                                                                         | --                     |
| Severe motor impairment with blindness due to neonatal encephalopathy due to birth asphyxia and trauma                    | Severe motor impairment with blindness                               | (combined DW)                                                                                                                                                                                                                         | --                     |
| Moderate motor impairment with epilepsy due to neonatal sepsis and other neonatal infections                              | Moderate motor impairment with epilepsy                              | (combined DW)                                                                                                                                                                                                                         | --                     |
| Moderate motor plus cognitive impairment with epilepsy due to neonatal sepsis and other neonatal infections               | Moderate motor plus cognitive impairment with epilepsy               | (combined DW)                                                                                                                                                                                                                         | --                     |
| Severe motor impairment with blindness due to neonatal sepsis and other neonatal infections                               | Severe motor impairment with blindness                               | (combined DW)                                                                                                                                                                                                                         | --                     |
| Severe motor plus cognitive impairment with blindness and epilepsy due to neonatal sepsis and other neonatal infections   | Severe motor plus cognitive impairment with blindness and epilepsy   | (combined DW)                                                                                                                                                                                                                         | --                     |
| Mild motor impairment due to neonatal sepsis and other neonatal infections                                                | Motor impairment, mild                                               | has some difficulty in moving around but is able to walk without help.                                                                                                                                                                | 0.01<br>(0.005–0.019)  |
| Severe motor impairment with epilepsy due to neonatal sepsis and other neonatal infections                                | Severe motor impairment with epilepsy                                | (combined DW)                                                                                                                                                                                                                         | --                     |
| Asymptomatic neonatal sepsis and other neonatal infections                                                                | Asymptomatic                                                         | --                                                                                                                                                                                                                                    | --                     |
| Moderate motor impairment with blindness due to neonatal sepsis and other neonatal infections                             | Moderate motor impairment with blindness                             | (combined DW)                                                                                                                                                                                                                         | --                     |
| Severe motor impairment due to neonatal sepsis and other neonatal infections                                              | Motor impairment, severe                                             | is unable to move around without help, and is not able to lift or hold objects, get dressed or sit upright.                                                                                                                           | 0.402<br>(0.268–0.545) |
| Severe infection due to neonatal sepsis and other neonatal infections                                                     | Infectious disease, acute episode, severe                            | has a high fever and pain, and feels very weak, which causes great difficulty with daily activities.                                                                                                                                  | 0.133<br>(0.088–0.19)  |
| Moderate motor plus cognitive impairment with blindness and epilepsy due to neonatal sepsis and other neonatal infections | Moderate motor plus cognitive impairment with blindness and epilepsy | (combined DW)                                                                                                                                                                                                                         | --                     |
| Moderate motor impairment due to neonatal sepsis and other neonatal infections                                            | Motor impairment, moderate                                           | has some difficulty in moving around, and difficulty in lifting and holding objects, dressing and sitting upright, but is able to walk without help.                                                                                  | 0.061<br>(0.04–0.089)  |
| Severe motor plus cognitive impairment with epilepsy due to neonatal sepsis and other neonatal infections                 | Severe motor plus cognitive impairment with epilepsy                 | (combined DW)                                                                                                                                                                                                                         | --                     |
| Severe motor impairment with blindness and epilepsy due to neonatal sepsis and other neonatal infections                  | Severe motor impairment with blindness and epilepsy                  | (combined DW)                                                                                                                                                                                                                         | --                     |
| Mild motor plus cognitive impairments due to neonatal sepsis and other neonatal infections                                | Motor plus cognitive impairments, mild                               | has some difficulty in moving around but is able to walk without help. The person is slow in learning at school. As an adult, the person has some difficulty doing complex or unfamiliar tasks but otherwise functions independently. | 0.031<br>(0.018–0.05)  |
| Severe motor plus cognitive impairment with blindness due to neonatal sepsis and other neonatal infections                | Severe motor plus cognitive impairment with blindness                | (combined DW)                                                                                                                                                                                                                         | --                     |
| Moderate motor plus cognitive impairment with blindness due to neonatal sepsis and other neonatal infections              | Moderate motor plus cognitive impairment with blindness              | (combined DW)                                                                                                                                                                                                                         | --                     |
| Moderate motor impairment with blindness and epilepsy due to neonatal sepsis and other neonatal infections                | Moderate motor impairment with blindness and epilepsy                | (combined DW)                                                                                                                                                                                                                         | --                     |
| Severe motor impairment with blindness and epilepsy due to hemolytic disease and other neonatal jaundice                  | Severe motor impairment with blindness and epilepsy                  | (combined DW)                                                                                                                                                                                                                         | --                     |
| Severe motor impairment with epilepsy due to hemolytic disease and other neonatal jaundice                                | Severe motor impairment with epilepsy                                | (combined DW)                                                                                                                                                                                                                         | --                     |
| Severe motor plus cognitive impairment with blindness and epilepsy due to hemolytic disease and other neonatal jaundice   | Severe motor plus cognitive impairment with blindness and epilepsy   | (combined DW)                                                                                                                                                                                                                         | --                     |
| Severe motor plus cognitive impairment with blindness due to hemolytic disease and other neonatal jaundice                | Severe motor plus cognitive impairment with blindness                | (combined DW)                                                                                                                                                                                                                         | --                     |
| Severe motor plus cognitive impairment with epilepsy due to hemolytic disease and other neonatal jaundice                 | Severe motor plus cognitive impairment with epilepsy                 | (combined DW)                                                                                                                                                                                                                         | --                     |
| Moderate motor impairment with blindness and epilepsy due to hemolytic disease and other neonatal jaundice                | Moderate motor impairment with blindness and epilepsy                | (combined DW)                                                                                                                                                                                                                         | --                     |
| Moderate motor plus cognitive impairment with epilepsy due to hemolytic disease and other neonatal jaundice               | Moderate motor plus cognitive impairment with epilepsy               | (combined DW)                                                                                                                                                                                                                         | --                     |
| Moderate motor impairment with epilepsy due to hemolytic disease and other neonatal jaundice                              | Moderate motor impairment with epilepsy                              | (combined DW)                                                                                                                                                                                                                         | --                     |
| Moderate motor plus cognitive impairment with blindness due to hemolytic disease and other neonatal jaundice              | Moderate motor plus cognitive impairment with blindness              | (combined DW)                                                                                                                                                                                                                         | --                     |
| Moderate motor impairment with blindness due to hemolytic disease and other neonatal jaundice                             | Moderate motor impairment with blindness                             | (combined DW)                                                                                                                                                                                                                         | --                     |
| Severe motor impairment severe due to hemolytic disease and other neonatal jaundice                                       | Motor impairment, severe                                             | is unable to move around without help, and is not able to lift or hold objects, get dressed or sit upright.                                                                                                                           | 0.402<br>(0.268–0.545) |
| Moderate motor plus cognitive impairment with blindness and epilepsy due to hemolytic disease and other neonatal jaundice | Moderate motor plus cognitive impairment with blindness and epilepsy | (combined DW)                                                                                                                                                                                                                         | --                     |
| Moderate motor impairment due to hemolytic disease and other neonatal jaundice                                            | Motor impairment, moderate                                           | has some difficulty in moving around, and difficulty in lifting and holding objects, dressing and sitting upright, but is able to walk without help.                                                                                  | 0.061<br>(0.04–0.089)  |
| Severe motor impairment with blindness due to hemolytic disease and other neonatal jaundice                               | Severe motor impairment with blindness                               | (combined DW)                                                                                                                                                                                                                         | --                     |

**Appendix Table 6. GBD 2016 sequelae, health states, health state lay descriptions, and disability weights**

| Sequela                                                                                                      | Health state name                                                                                                | Health state lay description                                                                                                                                                                                              | Disability weight      |
|--------------------------------------------------------------------------------------------------------------|------------------------------------------------------------------------------------------------------------------|---------------------------------------------------------------------------------------------------------------------------------------------------------------------------------------------------------------------------|------------------------|
| Other neonatal disorders                                                                                     | Post-COMO calculation for residuals (YLL/YLD ratio, other methods)                                               | --                                                                                                                                                                                                                        | --                     |
| Moderate wasting without edema                                                                               | Asymptomatic                                                                                                     | --                                                                                                                                                                                                                        | --                     |
| Moderate wasting with edema                                                                                  | Kwashiorkor                                                                                                      | is very tired and irritable and has diarrhea.                                                                                                                                                                             | 0.051<br>(0.031–0.079) |
| Severe wasting without edema                                                                                 | Severe wasting                                                                                                   | is extremely skinny and has no energy.                                                                                                                                                                                    | 0.128<br>(0.082–0.183) |
| Severe wasting with edema                                                                                    | Kwashiorkor and severe wasting                                                                                   | (combined DW)                                                                                                                                                                                                             | 0.172<br>(0.115–0.238) |
| Visible goiter with profound intellectual disability due to iodine deficiency                                | Intellectual disability / mental retardation, profound and Iodine-deficiency goiter                              | (combined DW)                                                                                                                                                                                                             | 0.358<br>(0.252–0.475) |
| Visible goiter with severe intellectual disability due to iodine deficiency                                  | Intellectual disability / mental retardation, severe and Iodine-deficiency goiter                                | (combined DW)                                                                                                                                                                                                             | 0.326<br>(0.233–0.438) |
| Visible goiter with profound intellectual disability and mild heart failure due to iodine deficiency         | Intellectual disability / mental retardation, profound and Iodine-deficiency goiter and heart failure, mild      | (combined DW)                                                                                                                                                                                                             | 0.384<br>(0.276–0.502) |
| Visible goiter without symptoms                                                                              | Disfigurement, level 1                                                                                           | has a slight, visible physical deformity that others notice, which causes some worry and discomfort.                                                                                                                      | 0.011<br>(0.005–0.021) |
| Visible goiter with profound intellectual disability and moderate heart failure due to iodine deficiency     | Intellectual disability / mental retardation, profound and Iodine-deficiency goiter and heart failure, moderate  | (combined DW)                                                                                                                                                                                                             | 0.403<br>(0.293–0.524) |
| Visible goiter with profound intellectual disability with severe heart failure due to iodine deficiency      | Intellectual disability / mental retardation, profound and Iodine-deficiency goiter and heart failure, severe    | (combined DW)                                                                                                                                                                                                             | 0.471<br>(0.344–0.602) |
| Visible goiter with symptoms without intellectual disability or heart failure                                | Iodine-deficiency goiter                                                                                         | has a large mass in the front of the neck. The person sometimes has weakness and fatigue, constipation and weight gain.                                                                                                   | 0.199<br>(0.133–0.276) |
| Moderate vision impairment loss due to vitamin A deficiency                                                  | Distance vision, moderate impairment                                                                             | has vision problems that make it difficult to recognize faces or objects across a room.                                                                                                                                   | 0.031<br>(0.019–0.049) |
| Blindness due to vitamin A deficiency                                                                        | Distance vision blindness                                                                                        | is completely blind, which causes great difficulty in some daily activities, worry and anxiety, and great difficulty going outside the home without assistance.                                                           | 0.187<br>(0.124–0.26)  |
| Severe vision impairment loss due to vitamin A deficiency                                                    | Distance vision, severe impairment                                                                               | has severe vision loss, which causes difficulty in daily activities, some emotional impact (for example worry), and some difficulty going outside the home without assistance.                                            | 0.184<br>(0.125–0.258) |
| Asymptomatic vitamin A deficiency                                                                            | Asymptomatic                                                                                                     | --                                                                                                                                                                                                                        | --                     |
| Moderate heart failure due to iron-deficiency anemia                                                         | Heart failure, moderate                                                                                          | is short of breath and easily tires with minimal physical activity, such as walking only a short distance. The person feels comfortable at rest but avoids moderate activity.                                             | 0.072<br>(0.047–0.103) |
| Mild iron-deficiency anemia                                                                                  | Anemia, mild                                                                                                     | feels slightly tired and weak at times, but this does not interfere with normal daily activities.                                                                                                                         | 0.004<br>(0.001–0.008) |
| Asymptomatic and mild heart failure due to iron-deficiency anemia                                            | Heart failure, mild                                                                                              | is short of breath and easily tires with moderate physical activity, such as walking uphill or more than a quarter-mile on level ground. The person feels comfortable at rest or during activities requiring less effort. | 0.041<br>(0.026–0.062) |
| Severe iron-deficiency anemia                                                                                | Anemia, severe                                                                                                   | feels very weak, tired and short of breath, and has problems with activities that require physical effort or deep concentration.                                                                                          | 0.149<br>(0.101–0.209) |
| Severe heart failure due to iron-deficiency anemia                                                           | Heart failure, severe                                                                                            | is short of breath and feels tired when at rest. The person avoids any physical activity, for fear of worsening the breathing problems.                                                                                   | 0.179<br>(0.122–0.251) |
| Moderate iron-deficiency anemia                                                                              | Anemia, moderate                                                                                                 | feels moderate fatigue, weakness, and shortness of breath after exercise, making daily activities more difficult.                                                                                                         | 0.052<br>(0.034–0.076) |
| Other nutritional deficiencies                                                                               | Post-COMO calculation for residuals (YLL/YLD ratio, other methods)                                               | --                                                                                                                                                                                                                        | --                     |
| Cardiovascular complications due to adult tertiary syphilis                                                  | Infectious disease, acute episode, moderate                                                                      | has a fever and aches, and feels weak, which causes some difficulty with daily activities.                                                                                                                                | 0.051<br>(0.032–0.074) |
| Severe disfigurement, neurological problems, and cardiovascular complications due to adult tertiary syphilis | Level 3 disfigurement, moderate motor plus cognitive impairments, and moderate infectious disease, acute episode | (combined DW)                                                                                                                                                                                                             | 0.547<br>(0.402–0.691) |
| Severe disfigurement and cardiovascular complications due to adult tertiary syphilis                         | Level 3 disfigurement and moderate infectious disease, acute episode                                             | (combined DW)                                                                                                                                                                                                             | 0.435<br>(0.306–0.571) |
| Neurological problems due to adult tertiary syphilis                                                         | Motor plus cognitive impairments, moderate                                                                       | has some difficulty in moving around, holding objects, dressing and sitting upright, but can walk without help. The person has low intelligence and is slow in learning to speak and to do simple tasks.                  | 0.203<br>(0.134–0.29)  |
| Severe disfigurement due to adult tertiary syphilis                                                          | Disfigurement, level 3                                                                                           | has an obvious physical deformity that makes others uncomfortable, which causes the person to avoid social contact, feel worried, sleep poorly, and think about suicide.                                                  | 0.405<br>(0.275–0.546) |
| Asymptomatic early syphilis infection                                                                        | Asymptomatic                                                                                                     | --                                                                                                                                                                                                                        | --                     |
| Mild early syphilis infection                                                                                | Infectious disease, acute episode, mild                                                                          | has a low fever and mild discomfort, but no difficulty with daily activities.                                                                                                                                             | 0.006<br>(0.002–0.012) |
| Neurological problems and cardiovascular complications due to adult tertiary syphilis                        | Moderate motor plus cognitive impairments and moderate infectious disease, acute episode                         | (combined DW)                                                                                                                                                                                                             | 0.243<br>(0.168–0.333) |
| Asymptomatic adult tertiary syphilis                                                                         | Asymptomatic                                                                                                     | --                                                                                                                                                                                                                        | --                     |
| Severe disfigurement and neurological problems due to adult tertiary syphilis                                | Level 3 disfigurement and moderate motor plus cognitive impairments                                              | (combined DW)                                                                                                                                                                                                             | 0.523<br>(0.378–0.669) |
| Secondary infertility due to chlamydial infection                                                            | Infertility, secondary                                                                                           | has at least one child, and wants to have more children. The person has a fertile partner, but the couple cannot conceive.                                                                                                | 0.005<br>(0.002–0.011) |



**Appendix Table 6. GBD 2016 sequelae, health states, health state lay descriptions, and disability weights**

| Sequela                                                                          | Health state name                                                  | Health state lay description                                                                                                                                   | Disability weight      |
|----------------------------------------------------------------------------------|--------------------------------------------------------------------|----------------------------------------------------------------------------------------------------------------------------------------------------------------|------------------------|
| Asymptomatic chlamydial infection                                                | Asymptomatic                                                       | --                                                                                                                                                             | --                     |
| Moderate pelvic inflammatory diseases due to chlamydial infection                | Abdominopelvic problem, moderate                                   | has pain in the belly and feels nauseous. The person has difficulties with daily activities.                                                                   | 0.114<br>(0.078–0.159) |
| Severe pelvic inflammatory diseases due to chlamydial infection                  | Abdominopelvic problem, severe                                     | has severe pain in the belly and feels nauseous. The person is anxious and unable to carry out daily activities.                                               | 0.324<br>(0.22–0.442)  |
| Epididymo-orchitis due to chlamydial infection                                   | Epididymo-orchitis                                                 | has swelling and tenderness in the testicles and pain during urination.                                                                                        | 0.128<br>(0.086–0.18)  |
| Primary infertility due to chlamydial infection                                  | Infertility, primary                                               | wants to have a child and has a fertile partner, but the couple cannot conceive.                                                                               | 0.008<br>(0.003–0.015) |
| Mild chlamydial infection                                                        | Infectious disease, acute episode, mild                            | has a low fever and mild discomfort , but no difficulty with daily activities.                                                                                 | 0.006<br>(0.002–0.012) |
| Primary infertility due to gonococcal infection                                  | Infertility, primary                                               | wants to have a child and has a fertile partner, but the couple cannot conceive.                                                                               | 0.008<br>(0.003–0.015) |
| Epididymo-orchitis due to gonococcal infection                                   | Epididymo-orchitis                                                 | has swelling and tenderness in the testicles and pain during urination.                                                                                        | 0.128<br>(0.086–0.18)  |
| Severe pelvic inflammatory diseases due to gonococcal infection                  | Abdominopelvic problem, severe                                     | has severe pain in the belly and feels nauseous. The person is anxious and unable to carry out daily activities.                                               | 0.324<br>(0.22–0.442)  |
| Asymptomatic gonococcal infection                                                | Asymptomatic                                                       | --                                                                                                                                                             | --                     |
| Mild gonococcal infection                                                        | Infectious disease, acute episode, mild                            | has a low fever and mild discomfort , but no difficulty with daily activities.                                                                                 | 0.006<br>(0.002–0.012) |
| Secondary infertility due to gonococcal infection                                | Infertility, secondary                                             | has at least one child, and wants to have more children. The person has a fertile partner, but the couple cannot conceive.                                     | 0.005<br>(0.002–0.011) |
| Moderate pelvic inflammatory diseases due to gonococcal infection                | Abdominopelvic problem, moderate                                   | has pain in the belly and feels nauseous. The person has difficulties with daily activities.                                                                   | 0.114<br>(0.078–0.159) |
| Asymptomatic trichomoniasis infection                                            | Asymptomatic                                                       | --                                                                                                                                                             | --                     |
| Acute trichomoniasis infection                                                   | Infectious disease, acute episode, mild                            | has a low fever and mild discomfort , but no difficulty with daily activities.                                                                                 | 0.006<br>(0.002–0.012) |
| Moderate infection due to initial genital herpes episode                         | Infectious disease, acute episode, moderate                        | has a fever and aches, and feels weak, which causes some difficulty with daily activities.                                                                     | 0.051<br>(0.032–0.074) |
| Asymptomatic genital herpes                                                      | Asymptomatic                                                       | --                                                                                                                                                             | --                     |
| Symptomatic genital herpes                                                       | Infectious disease, acute episode, mild                            | has a low fever and mild discomfort , but no difficulty with daily activities.                                                                                 | 0.006<br>(0.002–0.012) |
| Primary infertility due to other sexually transmitted diseases                   | Infertility, primary                                               | wants to have a child and has a fertile partner, but the couple cannot conceive.                                                                               | 0.008<br>(0.003–0.015) |
| Severe pelvic inflammatory diseases due to other sexually transmitted diseases   | Abdominopelvic problem, severe                                     | has severe pain in the belly and feels nauseous. The person is anxious and unable to carry out daily activities.                                               | 0.324<br>(0.22–0.442)  |
| Other sexually transmitted diseases                                              | Post-COMO calculation for residuals (YLL/YLD ratio, other methods) | --                                                                                                                                                             | --                     |
| Secondary infertility due to other sexually transmitted diseases                 | Infertility, secondary                                             | has at least one child, and wants to have more children. The person has a fertile partner, but the couple cannot conceive.                                     | 0.005<br>(0.002–0.011) |
| Moderate pelvic inflammatory diseases due to other sexually transmitted diseases | Abdominopelvic problem, moderate                                   | has pain in the belly and feels nauseous. The person has difficulties with daily activities.                                                                   | 0.114<br>(0.078–0.159) |
| Asymptomatic acute hepatitis A                                                   | Asymptomatic                                                       | --                                                                                                                                                             | --                     |
| Severe acute hepatitis A                                                         | Infectious disease, acute episode, severe                          | has a high fever and pain, and feels very weak, which causes great difficulty with daily activities.                                                           | 0.133<br>(0.088–0.19)  |
| Moderate acute hepatitis A                                                       | Infectious disease, acute episode, moderate                        | has a fever and aches, and feels weak, which causes some difficulty with daily activities.                                                                     | 0.051<br>(0.032–0.074) |
| Severe acute hepatitis B                                                         | Infectious disease, acute episode, severe                          | has a high fever and pain, and feels very weak, which causes great difficulty with daily activities.                                                           | 0.133<br>(0.088–0.19)  |
| Moderate acute hepatitis B                                                       | Infectious disease, acute episode, moderate                        | has a fever and aches, and feels weak, which causes some difficulty with daily activities.                                                                     | 0.051<br>(0.032–0.074) |
| Chronic hepatitis B                                                              | Asymptomatic                                                       | --                                                                                                                                                             | --                     |
| Asymptomatic acute hepatitis B                                                   | Asymptomatic                                                       | --                                                                                                                                                             | --                     |
| Moderate acute hepatitis C                                                       | Infectious disease, acute episode, moderate                        | has a fever and aches, and feels weak, which causes some difficulty with daily activities.                                                                     | 0.051<br>(0.032–0.074) |
| Severe acute hepatitis C                                                         | Infectious disease, acute episode, severe                          | has a high fever and pain, and feels very weak, which causes great difficulty with daily activities.                                                           | 0.133<br>(0.088–0.19)  |
| Chronic hepatitis C                                                              | Asymptomatic                                                       | --                                                                                                                                                             | --                     |
| Asymptomatic acute hepatitis C                                                   | Asymptomatic                                                       | --                                                                                                                                                             | --                     |
| Asymptomatic acute hepatitis E                                                   | Asymptomatic                                                       | --                                                                                                                                                             | --                     |
| Moderate acute hepatitis E                                                       | Infectious disease, acute episode, moderate                        | has a fever and aches, and feels weak, which causes some difficulty with daily activities.                                                                     | 0.051<br>(0.032–0.074) |
| Severe acute hepatitis E                                                         | Infectious disease, acute episode, severe                          | has a high fever and pain, and feels very weak, which causes great difficulty with daily activities.                                                           | 0.133<br>(0.088–0.19)  |
| Guillain-Barré syndrome due to other infectious diseases                         | Spinal cord lesion below neck level (treated)                      | is paralyzed from the waist down, cannot feel or move the legs and has difficulties with urine and bowel control. The person uses a wheelchair to move around. | 0.296<br>(0.198–0.414) |
| Mild anemia due to other infectious diseases                                     | Anemia, mild                                                       | feels slightly tired and weak at times, but this does not interfere with normal daily activities.                                                              | 0.004<br>(0.001–0.008) |
| Other infectious diseases                                                        | Post-COMO calculation for residuals (YLL/YLD ratio, other methods) | --                                                                                                                                                             | --                     |
| Moderate anemia due to other infectious diseases                                 | Anemia, moderate                                                   | feels moderate fatigue, weakness, and shortness of breath after exercise, making daily activities more difficult.                                              | 0.052<br>(0.034–0.076) |
| Severe anemia due to other infectious diseases                                   | Anemia, severe                                                     | feels very weak, tired and short of breath, and has problems with activities that require physical effort or deep concentration.                               | 0.149<br>(0.101–0.209) |

**Appendix Table 6. GBD 2016 sequelae, health states, health state lay descriptions, and disability weights**

| Sequela                                                                | Health state name                                                             | Health state lay description                                                                                                                                                 | Disability weight      |
|------------------------------------------------------------------------|-------------------------------------------------------------------------------|------------------------------------------------------------------------------------------------------------------------------------------------------------------------------|------------------------|
| Controlled phase of mouth cancer                                       | Generic uncomplicated disease: worry and daily medication                     | has a chronic disease that requires medication every day and causes some worry but minimal interference with daily activities.                                               | 0.049<br>(0.031–0.072) |
| Metastatic phase of mouth cancer                                       | Cancer, metastatic                                                            | has severe pain, extreme fatigue, weight loss and high anxiety.                                                                                                              | 0.451<br>(0.307–0.6)   |
| Diagnosis and primary therapy phase of mouth cancer                    | Cancer, diagnosis and primary therapy                                         | has pain, nausea, fatigue, weight loss and high anxiety.                                                                                                                     | 0.288<br>(0.193–0.399) |
| Terminal phase of mouth cancer                                         | Terminal phase, with medication (for cancers, end-stage kidney/liver disease) | has lost a lot of weight and regularly uses strong medication to avoid constant pain. The person has no appetite, feels nauseous, and needs to spend most of the day in bed. | 0.54<br>(0.377–0.687)  |
| Terminal phase of nasopharynx cancer                                   | Terminal phase, with medication (for cancers, end-stage kidney/liver disease) | has lost a lot of weight and regularly uses strong medication to avoid constant pain. The person has no appetite, feels nauseous, and needs to spend most of the day in bed. | 0.54<br>(0.377–0.687)  |
| Controlled phase of nasopharynx cancer                                 | Generic uncomplicated disease: worry and daily medication                     | has a chronic disease that requires medication every day and causes some worry but minimal interference with daily activities.                                               | 0.049<br>(0.031–0.072) |
| Metastatic phase of nasopharynx cancer                                 | Cancer, metastatic                                                            | has severe pain, extreme fatigue, weight loss and high anxiety.                                                                                                              | 0.451<br>(0.307–0.6)   |
| Diagnosis and primary therapy phase of nasopharynx cancer              | Cancer, diagnosis and primary therapy                                         | has pain, nausea, fatigue, weight loss and high anxiety.                                                                                                                     | 0.288<br>(0.193–0.399) |
| Controlled phase of other pharynx cancer                               | Generic uncomplicated disease: worry and daily medication                     | has a chronic disease that requires medication every day and causes some worry but minimal interference with daily activities.                                               | 0.049<br>(0.031–0.072) |
| Metastatic phase of other pharynx cancer                               | Cancer, metastatic                                                            | has severe pain, extreme fatigue, weight loss and high anxiety.                                                                                                              | 0.451<br>(0.307–0.6)   |
| Terminal phase of other pharynx cancer                                 | Terminal phase, with medication (for cancers, end-stage kidney/liver disease) | has lost a lot of weight and regularly uses strong medication to avoid constant pain. The person has no appetite, feels nauseous, and needs to spend most of the day in bed. | 0.54<br>(0.377–0.687)  |
| Diagnosis and primary therapy phase of other pharynx cancer            | Cancer, diagnosis and primary therapy                                         | has pain, nausea, fatigue, weight loss and high anxiety.                                                                                                                     | 0.288<br>(0.193–0.399) |
| Controlled phase of esophageal cancer                                  | Generic uncomplicated disease: worry and daily medication                     | has a chronic disease that requires medication every day and causes some worry but minimal interference with daily activities.                                               | 0.049<br>(0.031–0.072) |
| Terminal phase of esophageal cancer                                    | Terminal phase, with medication (for cancers, end-stage kidney/liver disease) | has lost a lot of weight and regularly uses strong medication to avoid constant pain. The person has no appetite, feels nauseous, and needs to spend most of the day in bed. | 0.54<br>(0.377–0.687)  |
| Metastatic phase of esophageal cancer                                  | Cancer, metastatic                                                            | has severe pain, extreme fatigue, weight loss and high anxiety.                                                                                                              | 0.451<br>(0.307–0.6)   |
| Diagnosis and primary therapy phase of esophageal cancer               | Cancer, diagnosis and primary therapy                                         | has pain, nausea, fatigue, weight loss and high anxiety.                                                                                                                     | 0.288<br>(0.193–0.399) |
| Diagnosis and primary therapy phase of stomach cancer                  | Cancer, diagnosis and primary therapy                                         | has pain, nausea, fatigue, weight loss and high anxiety.                                                                                                                     | 0.288<br>(0.193–0.399) |
| Metastatic phase of stomach cancer                                     | Cancer, metastatic                                                            | has severe pain, extreme fatigue, weight loss and high anxiety.                                                                                                              | 0.451<br>(0.307–0.6)   |
| Terminal phase of stomach cancer                                       | Terminal phase, with medication (for cancers, end-stage kidney/liver disease) | has lost a lot of weight and regularly uses strong medication to avoid constant pain. The person has no appetite, feels nauseous, and needs to spend most of the day in bed. | 0.54<br>(0.377–0.687)  |
| Controlled phase of stomach cancer                                     | Generic uncomplicated disease: worry and daily medication                     | has a chronic disease that requires medication every day and causes some worry but minimal interference with daily activities.                                               | 0.049<br>(0.031–0.072) |
| Metastatic phase of colon and rectum cancers                           | Cancer, metastatic                                                            | has severe pain, extreme fatigue, weight loss and high anxiety.                                                                                                              | 0.451<br>(0.307–0.6)   |
| Terminal phase of colon and rectum cancers                             | Terminal phase, with medication (for cancers, end-stage kidney/liver disease) | has lost a lot of weight and regularly uses strong medication to avoid constant pain. The person has no appetite, feels nauseous, and needs to spend most of the day in bed. | 0.54<br>(0.377–0.687)  |
| Stoma due to colon and rectum cancer                                   | Stoma and generic medication                                                  | (combined DW)                                                                                                                                                                | 0.139<br>(0.094–0.192) |
| Diagnosis and primary therapy phase of colon and rectum cancers        | Cancer, diagnosis and primary therapy                                         | has pain, nausea, fatigue, weight loss and high anxiety.                                                                                                                     | 0.288<br>(0.193–0.399) |
| Controlled phase of colon and rectum cancers                           | Generic uncomplicated disease: worry and daily medication                     | has a chronic disease that requires medication every day and causes some worry but minimal interference with daily activities.                                               | 0.049<br>(0.031–0.072) |
| Controlled phase of liver cancer due to hepatitis B                    | Generic uncomplicated disease: worry and daily medication                     | has a chronic disease that requires medication every day and causes some worry but minimal interference with daily activities.                                               | 0.049<br>(0.031–0.072) |
| Terminal phase of liver cancer due to hepatitis B                      | Terminal phase, with medication (for cancers, end-stage kidney/liver disease) | has lost a lot of weight and regularly uses strong medication to avoid constant pain. The person has no appetite, feels nauseous, and needs to spend most of the day in bed. | 0.54<br>(0.377–0.687)  |
| Diagnosis and primary therapy phase of liver cancer due to hepatitis B | Cancer, diagnosis and primary therapy                                         | has pain, nausea, fatigue, weight loss and high anxiety.                                                                                                                     | 0.288<br>(0.193–0.399) |
| Metastatic phase of liver cancer due to hepatitis B                    | Cancer, metastatic                                                            | has severe pain, extreme fatigue, weight loss and high anxiety.                                                                                                              | 0.451<br>(0.307–0.6)   |
| Controlled phase of liver cancer due to hepatitis C                    | Generic uncomplicated disease: worry and daily medication                     | has a chronic disease that requires medication every day and causes some worry but minimal interference with daily activities.                                               | 0.049<br>(0.031–0.072) |
| Metastatic phase of liver cancer due to hepatitis C                    | Cancer, metastatic                                                            | has severe pain, extreme fatigue, weight loss and high anxiety.                                                                                                              | 0.451<br>(0.307–0.6)   |
| Diagnosis and primary therapy phase of liver cancer due to hepatitis C | Cancer, diagnosis and primary therapy                                         | has pain, nausea, fatigue, weight loss and high anxiety.                                                                                                                     | 0.288<br>(0.193–0.399) |

**Appendix Table 6. GBD 2016 sequelae, health states, health state lay descriptions, and disability weights**

| Sequela                                                                     | Health state name                                                             | Health state lay description                                                                                                                                                                                               | Disability weight      |
|-----------------------------------------------------------------------------|-------------------------------------------------------------------------------|----------------------------------------------------------------------------------------------------------------------------------------------------------------------------------------------------------------------------|------------------------|
| Terminal phase of liver cancer due to hepatitis C                           | Terminal phase, with medication (for cancers, end-stage kidney/liver disease) | has lost a lot of weight and regularly uses strong medication to avoid constant pain. The person has no appetite, feels nauseous, and needs to spend most of the day in bed.                                               | 0.54<br>(0.377–0.687)  |
| Diagnosis and primary therapy phase of liver cancer due to alcohol use      | Cancer, diagnosis and primary therapy                                         | has pain, nausea, fatigue, weight loss and high anxiety.                                                                                                                                                                   | 0.288<br>(0.193–0.399) |
| Terminal phase of liver cancer due to alcohol use                           | Terminal phase, with medication (for cancers, end-stage kidney/liver disease) | has lost a lot of weight and regularly uses strong medication to avoid constant pain. The person has no appetite, feels nauseous, and needs to spend most of the day in bed.                                               | 0.54<br>(0.377–0.687)  |
| Metastatic phase of liver cancer due to alcohol use                         | Cancer, metastatic                                                            | has severe pain, extreme fatigue, weight loss and high anxiety.                                                                                                                                                            | 0.451<br>(0.307–0.6)   |
| Controlled phase of liver cancer due to alcohol use                         | Generic uncomplicated disease: worry and daily medication                     | has a chronic disease that requires medication every day and causes some worry but minimal interference with daily activities.                                                                                             | 0.049<br>(0.031–0.072) |
| Controlled phase of liver cancer due to other causes                        | Generic uncomplicated disease: worry and daily medication                     | has a chronic disease that requires medication every day and causes some worry but minimal interference with daily activities.                                                                                             | 0.049<br>(0.031–0.072) |
| Metastatic phase of liver cancer due to other causes                        | Cancer, metastatic                                                            | has severe pain, extreme fatigue, weight loss and high anxiety.                                                                                                                                                            | 0.451<br>(0.307–0.6)   |
| Diagnosis and primary therapy phase of liver cancer due to other causes     | Cancer, diagnosis and primary therapy                                         | has pain, nausea, fatigue, weight loss and high anxiety.                                                                                                                                                                   | 0.288<br>(0.193–0.399) |
| Terminal phase of liver cancer due to other causes                          | Terminal phase, with medication (for cancers, end-stage kidney/liver disease) | has lost a lot of weight and regularly uses strong medication to avoid constant pain. The person has no appetite, feels nauseous, and needs to spend most of the day in bed.                                               | 0.54<br>(0.377–0.687)  |
| Diagnosis and primary therapy phase of gallbladder and biliary tract cancer | Cancer, diagnosis and primary therapy                                         | has pain, nausea, fatigue, weight loss and high anxiety.                                                                                                                                                                   | 0.288<br>(0.193–0.399) |
| Terminal phase of gallbladder and biliary tract cancer                      | Terminal phase, with medication (for cancers, end-stage kidney/liver disease) | has lost a lot of weight and regularly uses strong medication to avoid constant pain. The person has no appetite, feels nauseous, and needs to spend most of the day in bed.                                               | 0.54<br>(0.377–0.687)  |
| Metastatic phase of gallbladder and biliary tract cancer                    | Cancer, metastatic                                                            | has severe pain, extreme fatigue, weight loss and high anxiety.                                                                                                                                                            | 0.451<br>(0.307–0.6)   |
| Controlled phase of gallbladder and biliary tract cancer                    | Generic uncomplicated disease: worry and daily medication                     | has a chronic disease that requires medication every day and causes some worry but minimal interference with daily activities.                                                                                             | 0.049<br>(0.031–0.072) |
| Metastatic phase of pancreatic cancer                                       | Cancer, metastatic                                                            | has severe pain, extreme fatigue, weight loss and high anxiety.                                                                                                                                                            | 0.451<br>(0.307–0.6)   |
| Terminal phase of pancreatic cancer                                         | Terminal phase, with medication (for cancers, end-stage kidney/liver disease) | has lost a lot of weight and regularly uses strong medication to avoid constant pain. The person has no appetite, feels nauseous, and needs to spend most of the day in bed.                                               | 0.54<br>(0.377–0.687)  |
| Controlled phase of pancreatic cancer                                       | Generic uncomplicated disease: worry and daily medication                     | has a chronic disease that requires medication every day and causes some worry but minimal interference with daily activities.                                                                                             | 0.049<br>(0.031–0.072) |
| Diagnosis and primary therapy phase of pancreatic cancer                    | Cancer, diagnosis and primary therapy                                         | has pain, nausea, fatigue, weight loss and high anxiety.                                                                                                                                                                   | 0.288<br>(0.193–0.399) |
| Metastatic phase of larynx cancer                                           | Cancer, metastatic                                                            | has severe pain, extreme fatigue, weight loss and high anxiety.                                                                                                                                                            | 0.451<br>(0.307–0.6)   |
| Laryngectomy due to larynx cancer                                           | Speech problems and generic medication                                        | (combined DW)                                                                                                                                                                                                              | 0.098<br>(0.063–0.145) |
| Controlled phase of larynx cancer                                           | Generic uncomplicated disease: worry and daily medication                     | has a chronic disease that requires medication every day and causes some worry but minimal interference with daily activities.                                                                                             | 0.049<br>(0.031–0.072) |
| Diagnosis and primary therapy phase of larynx cancer                        | Cancer, diagnosis and primary therapy                                         | has pain, nausea, fatigue, weight loss and high anxiety.                                                                                                                                                                   | 0.288<br>(0.193–0.399) |
| Terminal phase of larynx cancer                                             | Terminal phase, with medication (for cancers, end-stage kidney/liver disease) | has lost a lot of weight and regularly uses strong medication to avoid constant pain. The person has no appetite, feels nauseous, and needs to spend most of the day in bed.                                               | 0.54<br>(0.377–0.687)  |
| Metastatic phase of lung, bronchus, and trachea cancer                      | Cancer, metastatic                                                            | has severe pain, extreme fatigue, weight loss and high anxiety.                                                                                                                                                            | 0.451<br>(0.307–0.6)   |
| Diagnosis and primary therapy phase of lung, bronchus, and trachea cancer   | Cancer, diagnosis and primary therapy                                         | has pain, nausea, fatigue, weight loss and high anxiety.                                                                                                                                                                   | 0.288<br>(0.193–0.399) |
| Controlled phase of lung, bronchus, and trachea cancer                      | Generic uncomplicated disease: worry and daily medication                     | has a chronic disease that requires medication every day and causes some worry but minimal interference with daily activities.                                                                                             | 0.049<br>(0.031–0.072) |
| Terminal phase of lung, bronchus, and trachea cancer                        | Terminal phase, with medication (for cancers, end-stage kidney/liver disease) | has lost a lot of weight and regularly uses strong medication to avoid constant pain. The person has no appetite, feels nauseous, and needs to spend most of the day in bed.                                               | 0.54<br>(0.377–0.687)  |
| Controlled phase of malignant skin melanoma                                 | Generic uncomplicated disease: worry and daily medication                     | has a chronic disease that requires medication every day and causes some worry but minimal interference with daily activities.                                                                                             | 0.049<br>(0.031–0.072) |
| Metastatic phase of malignant skin melanoma                                 | Cancer, metastatic                                                            | has severe pain, extreme fatigue, weight loss and high anxiety.                                                                                                                                                            | 0.451<br>(0.307–0.6)   |
| Terminal phase of malignant skin melanoma                                   | Terminal phase, with medication (for cancers, end-stage kidney/liver disease) | has lost a lot of weight and regularly uses strong medication to avoid constant pain. The person has no appetite, feels nauseous, and needs to spend most of the day in bed.                                               | 0.54<br>(0.377–0.687)  |
| Diagnosis and primary therapy phase of malignant skin melanoma              | Cancer, diagnosis and primary therapy                                         | has pain, nausea, fatigue, weight loss and high anxiety.                                                                                                                                                                   | 0.288<br>(0.193–0.399) |
| Severe disfigurement due to squamous cell carcinoma                         | Disfigurement, level 3, with itch/pain                                        | has an obvious physical deformity that is very painful and itchy. The physical deformity makes others uncomfortable, which causes the person to avoid social contact, feel worried, sleep poorly, and think about suicide. | 0.576<br>(0.401–0.731) |



**Appendix Table 6. GBD 2016 sequelae, health states, health state lay descriptions, and disability weights**

| Sequela                                                  | Health state name                                                             | Health state lay description                                                                                                                                                 | Disability weight      |
|----------------------------------------------------------|-------------------------------------------------------------------------------|------------------------------------------------------------------------------------------------------------------------------------------------------------------------------|------------------------|
| Moderate disfigurement due to squamous cell carcinoma    | Disfigurement, level 2                                                        | has a visible physical deformity that causes others to stare and comment. As a result, the person is worried and has trouble sleeping and concentrating.                     | 0.067<br>(0.044–0.096) |
| Mild disfigurement due to squamous cell carcinoma        | Disfigurement, level 1                                                        | has a slight, visible physical deformity that others notice, which causes some worry and discomfort.                                                                         | 0.011<br>(0.005–0.021) |
| Disfigurement due to basal cell carcinoma                | Disfigurement, level 1                                                        | has a slight, visible physical deformity that others notice, which causes some worry and discomfort.                                                                         | 0.011<br>(0.005–0.021) |
| Diagnosis and primary therapy phase of breast cancer     | Cancer, diagnosis and primary therapy                                         | has pain, nausea, fatigue, weight loss and high anxiety.                                                                                                                     | 0.288<br>(0.193–0.399) |
| Mastectomy due to breast cancer                          | Mastectomy and generic medication                                             | (combined DW)                                                                                                                                                                | 0.083<br>(0.052–0.124) |
| Controlled phase of breast cancer                        | Generic uncomplicated disease: worry and daily medication                     | has a chronic disease that requires medication every day and causes some worry but minimal interference with daily activities.                                               | 0.049<br>(0.031–0.072) |
| Metastatic phase of breast cancer                        | Cancer, metastatic                                                            | has severe pain, extreme fatigue, weight loss and high anxiety.                                                                                                              | 0.451<br>(0.307–0.6)   |
| Terminal phase of breast cancer                          | Terminal phase, with medication (for cancers, end-stage kidney/liver disease) | has lost a lot of weight and regularly uses strong medication to avoid constant pain. The person has no appetite, feels nauseous, and needs to spend most of the day in bed. | 0.54<br>(0.377–0.687)  |
| Terminal phase of cervical cancer                        | Terminal phase, with medication (for cancers, end-stage kidney/liver disease) | has lost a lot of weight and regularly uses strong medication to avoid constant pain. The person has no appetite, feels nauseous, and needs to spend most of the day in bed. | 0.54<br>(0.377–0.687)  |
| Diagnosis and primary therapy phase of cervical cancer   | Cancer, diagnosis and primary therapy                                         | has pain, nausea, fatigue, weight loss and high anxiety.                                                                                                                     | 0.288<br>(0.193–0.399) |
| Controlled phase of cervical cancer                      | Generic uncomplicated disease: worry and daily medication                     | has a chronic disease that requires medication every day and causes some worry but minimal interference with daily activities.                                               | 0.049<br>(0.031–0.072) |
| Metastatic phase of cervical cancer                      | Cancer, metastatic                                                            | has severe pain, extreme fatigue, weight loss and high anxiety.                                                                                                              | 0.451<br>(0.307–0.6)   |
| Controlled phase of uterine cancer                       | Generic uncomplicated disease: worry and daily medication                     | has a chronic disease that requires medication every day and causes some worry but minimal interference with daily activities.                                               | 0.049<br>(0.031–0.072) |
| Terminal phase of uterine cancer                         | Terminal phase, with medication (for cancers, end-stage kidney/liver disease) | has lost a lot of weight and regularly uses strong medication to avoid constant pain. The person has no appetite, feels nauseous, and needs to spend most of the day in bed. | 0.54<br>(0.377–0.687)  |
| Diagnosis and primary therapy phase of uterine cancer    | Cancer, diagnosis and primary therapy                                         | has pain, nausea, fatigue, weight loss and high anxiety.                                                                                                                     | 0.288<br>(0.193–0.399) |
| Metastatic phase of uterine cancer                       | Cancer, metastatic                                                            | has severe pain, extreme fatigue, weight loss and high anxiety.                                                                                                              | 0.451<br>(0.307–0.6)   |
| Diagnosis and primary therapy phase of ovarian cancer    | Cancer, diagnosis and primary therapy                                         | has pain, nausea, fatigue, weight loss and high anxiety.                                                                                                                     | 0.288<br>(0.193–0.399) |
| Controlled phase of ovarian cancer                       | Generic uncomplicated disease: worry and daily medication                     | has a chronic disease that requires medication every day and causes some worry but minimal interference with daily activities.                                               | 0.049<br>(0.031–0.072) |
| Metastatic phase of ovarian cancer                       | Cancer, metastatic                                                            | has severe pain, extreme fatigue, weight loss and high anxiety.                                                                                                              | 0.451<br>(0.307–0.6)   |
| Terminal phase of ovarian cancer                         | Terminal phase, with medication (for cancers, end-stage kidney/liver disease) | has lost a lot of weight and regularly uses strong medication to avoid constant pain. The person has no appetite, feels nauseous, and needs to spend most of the day in bed. | 0.54<br>(0.377–0.687)  |
| Diagnosis and primary therapy phase of prostate cancer   | Cancer, diagnosis and primary therapy                                         | has pain, nausea, fatigue, weight loss and high anxiety.                                                                                                                     | 0.288<br>(0.193–0.399) |
| Impotence due to prostate cancer                         | Impotence and generic medication                                              | (combined DW)                                                                                                                                                                | 0.065<br>(0.04–0.1)    |
| Terminal phase of prostate cancer                        | Terminal phase, with medication (for cancers, end-stage kidney/liver disease) | has lost a lot of weight and regularly uses strong medication to avoid constant pain. The person has no appetite, feels nauseous, and needs to spend most of the day in bed. | 0.54<br>(0.377–0.687)  |
| Controlled phase of prostate cancer                      | Generic uncomplicated disease: worry and daily medication                     | has a chronic disease that requires medication every day and causes some worry but minimal interference with daily activities.                                               | 0.049<br>(0.031–0.072) |
| Metastatic phase of prostate cancer                      | Cancer, metastatic                                                            | has severe pain, extreme fatigue, weight loss and high anxiety.                                                                                                              | 0.451<br>(0.307–0.6)   |
| Incontinence due to prostate cancer                      | Incontinence and generic medication                                           | (combined DW)                                                                                                                                                                | 0.181<br>(0.124–0.248) |
| Terminal phase of testicular cancer                      | Terminal phase, with medication (for cancers, end-stage kidney/liver disease) | has lost a lot of weight and regularly uses strong medication to avoid constant pain. The person has no appetite, feels nauseous, and needs to spend most of the day in bed. | 0.54<br>(0.377–0.687)  |
| Metastatic phase of testicular cancer                    | Cancer, metastatic                                                            | has severe pain, extreme fatigue, weight loss and high anxiety.                                                                                                              | 0.451<br>(0.307–0.6)   |
| Diagnosis and primary therapy phase of testicular cancer | Cancer, diagnosis and primary therapy                                         | has pain, nausea, fatigue, weight loss and high anxiety.                                                                                                                     | 0.288<br>(0.193–0.399) |
| Controlled phase of testicular cancer                    | Generic uncomplicated disease: worry and daily medication                     | has a chronic disease that requires medication every day and causes some worry but minimal interference with daily activities.                                               | 0.049<br>(0.031–0.072) |
| Diagnosis and primary therapy phase of kidney cancer     | Cancer, diagnosis and primary therapy                                         | has pain, nausea, fatigue, weight loss and high anxiety.                                                                                                                     | 0.288<br>(0.193–0.399) |
| Metastatic phase of kidney cancer                        | Cancer, metastatic                                                            | has severe pain, extreme fatigue, weight loss and high anxiety.                                                                                                              | 0.451<br>(0.307–0.6)   |
| Terminal phase of kidney cancer                          | Terminal phase, with medication (for cancers, end-stage kidney/liver disease) | has lost a lot of weight and regularly uses strong medication to avoid constant pain. The person has no appetite, feels nauseous, and needs to spend most of the day in bed. | 0.54<br>(0.377–0.687)  |

**Appendix Table 6. GBD 2016 sequelae, health states, health state lay descriptions, and disability weights**

| Sequela                                                                 | Health state name                                                             | Health state lay description                                                                                                                                                 | Disability weight      |
|-------------------------------------------------------------------------|-------------------------------------------------------------------------------|------------------------------------------------------------------------------------------------------------------------------------------------------------------------------|------------------------|
| Controlled phase of kidney cancer                                       | Generic uncomplicated disease: worry and daily medication                     | has a chronic disease that requires medication every day and causes some worry but minimal interference with daily activities.                                               | 0.049<br>(0.031–0.072) |
| Controlled phase of bladder cancer                                      | Generic uncomplicated disease: worry and daily medication                     | has a chronic disease that requires medication every day and causes some worry but minimal interference with daily activities.                                               | 0.049<br>(0.031–0.072) |
| Urinary incontinence due to bladder cancer                              | Incontinence and generic medication                                           | (combined DW)                                                                                                                                                                | 0.181<br>(0.124–0.248) |
| Terminal phase of bladder cancer                                        | Terminal phase, with medication (for cancers, end-stage kidney/liver disease) | has lost a lot of weight and regularly uses strong medication to avoid constant pain. The person has no appetite, feels nauseous, and needs to spend most of the day in bed. | 0.54<br>(0.377–0.687)  |
| Diagnosis and primary therapy phase of bladder cancer                   | Cancer, diagnosis and primary therapy                                         | has pain, nausea, fatigue, weight loss and high anxiety.                                                                                                                     | 0.288<br>(0.193–0.399) |
| Metastatic phase of bladder cancer                                      | Cancer, metastatic                                                            | has severe pain, extreme fatigue, weight loss and high anxiety.                                                                                                              | 0.451<br>(0.307–0.6)   |
| Diagnosis and primary therapy phase of brain and nervous system cancers | Cancer, diagnosis and primary therapy                                         | has pain, nausea, fatigue, weight loss and high anxiety.                                                                                                                     | 0.288<br>(0.193–0.399) |
| Terminal phase of brain and nervous system cancers                      | Terminal phase, with medication (for cancers, end-stage kidney/liver disease) | has lost a lot of weight and regularly uses strong medication to avoid constant pain. The person has no appetite, feels nauseous, and needs to spend most of the day in bed. | 0.54<br>(0.377–0.687)  |
| Metastatic phase of brain and nervous system cancers                    | Cancer, metastatic                                                            | has severe pain, extreme fatigue, weight loss and high anxiety.                                                                                                              | 0.451<br>(0.307–0.6)   |
| Controlled phase of brain and nervous system cancers                    | Generic uncomplicated disease: worry and daily medication                     | has a chronic disease that requires medication every day and causes some worry but minimal interference with daily activities.                                               | 0.049<br>(0.031–0.072) |
| Terminal phase of thyroid cancer                                        | Terminal phase, with medication (for cancers, end-stage kidney/liver disease) | has lost a lot of weight and regularly uses strong medication to avoid constant pain. The person has no appetite, feels nauseous, and needs to spend most of the day in bed. | 0.54<br>(0.377–0.687)  |
| Controlled phase of thyroid cancer                                      | Generic uncomplicated disease: worry and daily medication                     | has a chronic disease that requires medication every day and causes some worry but minimal interference with daily activities.                                               | 0.049<br>(0.031–0.072) |
| Metastatic phase of thyroid cancer                                      | Cancer, metastatic                                                            | has severe pain, extreme fatigue, weight loss and high anxiety.                                                                                                              | 0.451<br>(0.307–0.6)   |
| Diagnosis and primary therapy phase of thyroid cancer                   | Cancer, diagnosis and primary therapy                                         | has pain, nausea, fatigue, weight loss and high anxiety.                                                                                                                     | 0.288<br>(0.193–0.399) |
| Terminal phase of mesothelioma                                          | Terminal phase, with medication (for cancers, end-stage kidney/liver disease) | has lost a lot of weight and regularly uses strong medication to avoid constant pain. The person has no appetite, feels nauseous, and needs to spend most of the day in bed. | 0.54<br>(0.377–0.687)  |
| Controlled phase of mesothelioma                                        | Generic uncomplicated disease: worry and daily medication                     | has a chronic disease that requires medication every day and causes some worry but minimal interference with daily activities.                                               | 0.049<br>(0.031–0.072) |
| Diagnosis and primary therapy phase of mesothelioma                     | Cancer, diagnosis and primary therapy                                         | has pain, nausea, fatigue, weight loss and high anxiety.                                                                                                                     | 0.288<br>(0.193–0.399) |
| Metastatic phase of mesothelioma                                        | Cancer, metastatic                                                            | has severe pain, extreme fatigue, weight loss and high anxiety.                                                                                                              | 0.451<br>(0.307–0.6)   |
| Controlled phase of Hodgkin disease                                     | Generic uncomplicated disease: worry and daily medication                     | has a chronic disease that requires medication every day and causes some worry but minimal interference with daily activities.                                               | 0.049<br>(0.031–0.072) |
| Metastatic phase of Hodgkin disease                                     | Cancer, metastatic                                                            | has severe pain, extreme fatigue, weight loss and high anxiety.                                                                                                              | 0.451<br>(0.307–0.6)   |
| Diagnosis and primary therapy phase of Hodgkin disease                  | Cancer, diagnosis and primary therapy                                         | has pain, nausea, fatigue, weight loss and high anxiety.                                                                                                                     | 0.288<br>(0.193–0.399) |
| Terminal phase of Hodgkin disease                                       | Terminal phase, with medication (for cancers, end-stage kidney/liver disease) | has lost a lot of weight and regularly uses strong medication to avoid constant pain. The person has no appetite, feels nauseous, and needs to spend most of the day in bed. | 0.54<br>(0.377–0.687)  |
| Metastatic phase of non-Hodgkin lymphoma                                | Cancer, metastatic                                                            | has severe pain, extreme fatigue, weight loss and high anxiety.                                                                                                              | 0.451<br>(0.307–0.6)   |
| Terminal phase of non-Hodgkin lymphoma                                  | Terminal phase, with medication (for cancers, end-stage kidney/liver disease) | has lost a lot of weight and regularly uses strong medication to avoid constant pain. The person has no appetite, feels nauseous, and needs to spend most of the day in bed. | 0.54<br>(0.377–0.687)  |
| Controlled phase of non-Hodgkin lymphoma                                | Generic uncomplicated disease: worry and daily medication                     | has a chronic disease that requires medication every day and causes some worry but minimal interference with daily activities.                                               | 0.049<br>(0.031–0.072) |
| Diagnosis and primary therapy phase of non-Hodgkin lymphoma             | Cancer, diagnosis and primary therapy                                         | has pain, nausea, fatigue, weight loss and high anxiety.                                                                                                                     | 0.288<br>(0.193–0.399) |
| Terminal phase of multiple myeloma                                      | Terminal phase, with medication (for cancers, end-stage kidney/liver disease) | has lost a lot of weight and regularly uses strong medication to avoid constant pain. The person has no appetite, feels nauseous, and needs to spend most of the day in bed. | 0.54<br>(0.377–0.687)  |
| Diagnosis and primary therapy phase of multiple myeloma                 | Cancer, diagnosis and primary therapy                                         | has pain, nausea, fatigue, weight loss and high anxiety.                                                                                                                     | 0.288<br>(0.193–0.399) |
| Metastatic phase of multiple myeloma                                    | Cancer, metastatic                                                            | has severe pain, extreme fatigue, weight loss and high anxiety.                                                                                                              | 0.451<br>(0.307–0.6)   |
| Controlled phase of multiple myeloma                                    | Generic uncomplicated disease: worry and daily medication                     | has a chronic disease that requires medication every day and causes some worry but minimal interference with daily activities.                                               | 0.049<br>(0.031–0.072) |
| Controlled phase of acute lymphoid leukemia                             | Generic uncomplicated disease: worry and daily medication                     | has a chronic disease that requires medication every day and causes some worry but minimal interference with daily activities.                                               | 0.049<br>(0.031–0.072) |
| Diagnosis and primary therapy phase of acute lymphoid leukemia          | Cancer, diagnosis and primary therapy                                         | has pain, nausea, fatigue, weight loss and high anxiety.                                                                                                                     | 0.288<br>(0.193–0.399) |

**Appendix Table 6. GBD 2016 sequelae, health states, health state lay descriptions, and disability weights**

| Sequela                                                            | Health state name                                                             | Health state lay description                                                                                                                                                                                              | Disability weight      |
|--------------------------------------------------------------------|-------------------------------------------------------------------------------|---------------------------------------------------------------------------------------------------------------------------------------------------------------------------------------------------------------------------|------------------------|
| Metastatic phase of acute lymphoid leukemia                        | Cancer, metastatic                                                            | has severe pain, extreme fatigue, weight loss and high anxiety.                                                                                                                                                           | 0.451<br>(0.307–0.6)   |
| Terminal phase of acute lymphoid leukemia                          | Terminal phase, with medication (for cancers, end-stage kidney/liver disease) | has lost a lot of weight and regularly uses strong medication to avoid constant pain. The person has no appetite, feels nauseous, and needs to spend most of the day in bed.                                              | 0.54<br>(0.377–0.687)  |
| Metastatic phase of chronic lymphoid leukemia                      | Cancer, metastatic                                                            | has severe pain, extreme fatigue, weight loss and high anxiety.                                                                                                                                                           | 0.451<br>(0.307–0.6)   |
| Terminal phase of chronic lymphoid leukemia                        | Terminal phase, with medication (for cancers, end-stage kidney/liver disease) | has lost a lot of weight and regularly uses strong medication to avoid constant pain. The person has no appetite, feels nauseous, and needs to spend most of the day in bed.                                              | 0.54<br>(0.377–0.687)  |
| Diagnosis and primary therapy phase of chronic lymphoid leukemia   | Cancer, diagnosis and primary therapy                                         | has pain, nausea, fatigue, weight loss and high anxiety.                                                                                                                                                                  | 0.288<br>(0.193–0.399) |
| Controlled phase of chronic lymphoid leukemia                      | Generic uncomplicated disease: worry and daily medication                     | has a chronic disease that requires medication every day and causes some worry but minimal interference with daily activities.                                                                                            | 0.049<br>(0.031–0.072) |
| Diagnosis and primary therapy phase of acute myeloid leukemia      | Cancer, diagnosis and primary therapy                                         | has pain, nausea, fatigue, weight loss and high anxiety.                                                                                                                                                                  | 0.288<br>(0.193–0.399) |
| Controlled phase of acute myeloid leukemia                         | Generic uncomplicated disease: worry and daily medication                     | has a chronic disease that requires medication every day and causes some worry but minimal interference with daily activities.                                                                                            | 0.049<br>(0.031–0.072) |
| Terminal phase of acute myeloid leukemia                           | Terminal phase, with medication (for cancers, end-stage kidney/liver disease) | has lost a lot of weight and regularly uses strong medication to avoid constant pain. The person has no appetite, feels nauseous, and needs to spend most of the day in bed.                                              | 0.54<br>(0.377–0.687)  |
| Metastatic phase of acute myeloid leukemia                         | Cancer, metastatic                                                            | has severe pain, extreme fatigue, weight loss and high anxiety.                                                                                                                                                           | 0.451<br>(0.307–0.6)   |
| Diagnosis and primary therapy phase of chronic myeloid leukemia    | Cancer, diagnosis and primary therapy                                         | has pain, nausea, fatigue, weight loss and high anxiety.                                                                                                                                                                  | 0.288<br>(0.193–0.399) |
| Metastatic phase of chronic myeloid leukemia                       | Cancer, metastatic                                                            | has severe pain, extreme fatigue, weight loss and high anxiety.                                                                                                                                                           | 0.451<br>(0.307–0.6)   |
| Terminal phase of chronic myeloid leukemia                         | Terminal phase, with medication (for cancers, end-stage kidney/liver disease) | has lost a lot of weight and regularly uses strong medication to avoid constant pain. The person has no appetite, feels nauseous, and needs to spend most of the day in bed.                                              | 0.54<br>(0.377–0.687)  |
| Controlled phase of chronic myeloid leukemia                       | Generic uncomplicated disease: worry and daily medication                     | has a chronic disease that requires medication every day and causes some worry but minimal interference with daily activities.                                                                                            | 0.049<br>(0.031–0.072) |
| Metastatic phase of other leukemia                                 | Cancer, metastatic                                                            | has severe pain, extreme fatigue, weight loss and high anxiety.                                                                                                                                                           | 0.451<br>(0.307–0.6)   |
| Controlled phase of other leukemia                                 | Generic uncomplicated disease: worry and daily medication                     | has a chronic disease that requires medication every day and causes some worry but minimal interference with daily activities.                                                                                            | 0.049<br>(0.031–0.072) |
| Diagnosis and primary therapy phase of other leukemia              | Cancer, diagnosis and primary therapy                                         | has pain, nausea, fatigue, weight loss and high anxiety.                                                                                                                                                                  | 0.288<br>(0.193–0.399) |
| Terminal phase of other leukemia                                   | Terminal phase, with medication (for cancers, end-stage kidney/liver disease) | has lost a lot of weight and regularly uses strong medication to avoid constant pain. The person has no appetite, feels nauseous, and needs to spend most of the day in bed.                                              | 0.54<br>(0.377–0.687)  |
| Terminal phase of other neoplasms                                  | Terminal phase, with medication (for cancers, end-stage kidney/liver disease) | has lost a lot of weight and regularly uses strong medication to avoid constant pain. The person has no appetite, feels nauseous, and needs to spend most of the day in bed.                                              | 0.54<br>(0.377–0.687)  |
| Diagnosis and primary therapy phase of other neoplasms             | Cancer, diagnosis and primary therapy                                         | has pain, nausea, fatigue, weight loss and high anxiety.                                                                                                                                                                  | 0.288<br>(0.193–0.399) |
| Metastatic phase of other neoplasms                                | Cancer, metastatic                                                            | has severe pain, extreme fatigue, weight loss and high anxiety.                                                                                                                                                           | 0.451<br>(0.307–0.6)   |
| Controlled phase of other neoplasms                                | Generic uncomplicated disease: worry and daily medication                     | has a chronic disease that requires medication every day and causes some worry but minimal interference with daily activities.                                                                                            | 0.049<br>(0.031–0.072) |
| Severe heart failure due to rheumatic heart disease                | Heart failure, severe                                                         | is short of breath and feels tired when at rest. The person avoids any physical activity, for fear of worsening the breathing problems.                                                                                   | 0.179<br>(0.122–0.251) |
| Rheumatic heart disease, without heart failure                     | Generic uncomplicated disease: worry and daily medication                     | has a chronic disease that requires medication every day and causes some worry but minimal interference with daily activities.                                                                                            | 0.049<br>(0.031–0.072) |
| Moderate heart failure due to rheumatic heart disease              | Heart failure, moderate                                                       | is short of breath and easily tires with minimal physical activity, such as walking only a short distance. The person feels comfortable at rest but avoids moderate activity.                                             | 0.072<br>(0.047–0.103) |
| Asymptomatic and mild heart failure due to rheumatic heart disease | Heart failure, mild                                                           | is short of breath and easily tires with moderate physical activity, such as walking uphill or more than a quarter-mile on level ground. The person feels comfortable at rest or during activities requiring less effort. | 0.041<br>(0.026–0.062) |
| Acute myocardial infarction first 2 days                           | Acute myocardial infarction, days 1-2                                         | has severe chest pain that becomes worse with any physical activity. The person feels nauseous, short of breath, and very anxious.                                                                                        | 0.432<br>(0.288–0.579) |
| Asymptomatic and mild heart failure due to ischemic heart disease  | Heart failure, mild                                                           | is short of breath and easily tires with moderate physical activity, such as walking uphill or more than a quarter-mile on level ground. The person feels comfortable at rest or during activities requiring less effort. | 0.041<br>(0.026–0.062) |
| Asymptomatic angina due to ischemic heart disease                  | Asymptomatic                                                                  | --                                                                                                                                                                                                                        | --                     |
| Severe heart failure due to ischemic heart disease                 | Heart failure, severe                                                         | is short of breath and feels tired when at rest. The person avoids any physical activity, for fear of worsening the breathing problems.                                                                                   | 0.179<br>(0.122–0.251) |

**Appendix Table 6. GBD 2016 sequelae, health states, health state lay descriptions, and disability weights**

| Sequela                                                               | Health state name                                                | Health state lay description                                                                                                                                                                                              | Disability weight      |
|-----------------------------------------------------------------------|------------------------------------------------------------------|---------------------------------------------------------------------------------------------------------------------------------------------------------------------------------------------------------------------------|------------------------|
| Acute myocardial infarction 3 to 28 days                              | Acute myocardial infarction, days 3-28                           | gets short of breath after heavy physical activity, and tires easily, but has no problems when at rest. The person has to take medication every day and has some anxiety.                                                 | 0.074<br>(0.049–0.105) |
| Moderate angina due to ischemic heart disease                         | Angina pectoris, moderate                                        | has chest pain that occurs with moderate physical activity, such as walking uphill or more than half a kilometer (around a quarter-mile) on level ground. After a brief rest, the pain goes away.                         | 0.08<br>(0.052–0.113)  |
| Asymptomatic ischemic heart disease following myocardial infarction   | Asymptomatic                                                     | --                                                                                                                                                                                                                        | --                     |
| Severe angina due to ischemic heart disease                           | Angina pectoris, severe                                          | has chest pain that occurs with minimal physical activity, such as walking only a short distance. After a brief rest, the pain goes away. The person avoids most physical activities because of the pain.                 | 0.167<br>(0.11–0.24)   |
| Moderate heart failure due to ischemic heart disease                  | Heart failure, moderate                                          | is short of breath and easily tires with minimal physical activity, such as walking only a short distance. The person feels comfortable at rest but avoids moderate activity.                                             | 0.072<br>(0.047–0.103) |
| Mild angina due to ischemic heart disease                             | Angina pectoris, mild                                            | has chest pain that occurs with strenuous physical activity, such as running or lifting heavy objects. After a brief rest, the pain goes away.                                                                            | 0.033<br>(0.02–0.052)  |
| Acute ischemic stroke severity level 1                                | Stroke, long-term consequences, mild                             | has some difficulty in moving around and some weakness in one hand, but is able to walk without help.                                                                                                                     | 0.019<br>(0.01–0.032)  |
| Chronic ischemic stroke severity level 1                              | Stroke, long-term consequences, mild                             | has some difficulty in moving around and some weakness in one hand, but is able to walk without help.                                                                                                                     | 0.019<br>(0.01–0.032)  |
| Acute ischemic stroke severity level 2                                | Stroke, long-term consequences, moderate                         | has some difficulty in moving around, and in using the hands for lifting and holding things, dressing and grooming.                                                                                                       | 0.07<br>(0.046–0.099)  |
| Chronic ischemic stroke severity level 5                              | Stroke, long-term consequences, severe plus cognition problems   | is confined to bed or a wheelchair, depends on others for feeding, toileting and dressing, and has difficulty speaking, thinking clearly and remembering things.                                                          | 0.588<br>(0.411–0.744) |
| Chronic ischemic stroke severity level 2                              | Stroke, long-term consequences, moderate                         | has some difficulty in moving around, and in using the hands for lifting and holding things, dressing and grooming.                                                                                                       | 0.07<br>(0.046–0.099)  |
| Acute ischemic stroke severity level 5                                | Stroke, long-term consequences, severe plus cognition problems   | is confined to bed or a wheelchair, depends on others for feeding, toileting and dressing, and has difficulty speaking, thinking clearly and remembering things.                                                          | 0.588<br>(0.411–0.744) |
| Acute ischemic stroke severity level 3                                | Stroke, long-term consequences, moderate plus cognition problems | has some difficulty in moving around, in using the hands for lifting and holding things, dressing and grooming, and in speaking. The person is often forgetful and confused.                                              | 0.316<br>(0.206–0.437) |
| Chronic ischemic stroke severity level 4                              | Stroke, long-term consequences, severe                           | is confined to bed or a wheelchair, has difficulty speaking and depends on others for feeding, toileting and dressing.                                                                                                    | 0.552<br>(0.377–0.707) |
| Chronic ischemic stroke severity level 3                              | Stroke, long-term consequences, moderate plus cognition problems | has some difficulty in moving around, in using the hands for lifting and holding things, dressing and grooming, and in speaking. The person is often forgetful and confused.                                              | 0.316<br>(0.206–0.437) |
| Acute ischemic stroke severity level 4                                | Stroke, long-term consequences, severe                           | is confined to bed or a wheelchair, has difficulty speaking and depends on others for feeding, toileting and dressing.                                                                                                    | 0.552<br>(0.377–0.707) |
| Asymptomatic chronic ischemic stroke                                  | Asymptomatic                                                     | --                                                                                                                                                                                                                        | --                     |
| Chronic hemorrhagic stroke severity level 1                           | Stroke, long-term consequences, mild                             | has some difficulty in moving around and some weakness in one hand, but is able to walk without help.                                                                                                                     | 0.019<br>(0.01–0.032)  |
| Acute hemorrhagic stroke severity level 5                             | Stroke, long-term consequences, severe plus cognition problems   | is confined to bed or a wheelchair, depends on others for feeding, toileting and dressing, and has difficulty speaking, thinking clearly and remembering things.                                                          | 0.588<br>(0.411–0.744) |
| Chronic hemorrhagic stroke severity level 5                           | Stroke, long-term consequences, severe plus cognition problems   | is confined to bed or a wheelchair, depends on others for feeding, toileting and dressing, and has difficulty speaking, thinking clearly and remembering things.                                                          | 0.588<br>(0.411–0.744) |
| Acute hemorrhagic stroke severity level 1                             | Stroke, long-term consequences, mild                             | has some difficulty in moving around and some weakness in one hand, but is able to walk without help.                                                                                                                     | 0.019<br>(0.01–0.032)  |
| Acute hemorrhagic stroke severity level 2                             | Stroke, long-term consequences, moderate                         | has some difficulty in moving around, and in using the hands for lifting and holding things, dressing and grooming.                                                                                                       | 0.07<br>(0.046–0.099)  |
| Chronic hemorrhagic stroke severity level 2                           | Stroke, long-term consequences, moderate                         | has some difficulty in moving around, and in using the hands for lifting and holding things, dressing and grooming.                                                                                                       | 0.07<br>(0.046–0.099)  |
| Chronic hemorrhagic stroke severity level 4                           | Stroke, long-term consequences, severe                           | is confined to bed or a wheelchair, has difficulty speaking and depends on others for feeding, toileting and dressing.                                                                                                    | 0.552<br>(0.377–0.707) |
| Acute hemorrhagic stroke severity level 3                             | Stroke, long-term consequences, moderate plus cognition problems | has some difficulty in moving around, in using the hands for lifting and holding things, dressing and grooming, and in speaking. The person is often forgetful and confused.                                              | 0.316<br>(0.206–0.437) |
| Chronic hemorrhagic stroke severity level 3                           | Stroke, long-term consequences, moderate plus cognition problems | has some difficulty in moving around, in using the hands for lifting and holding things, dressing and grooming, and in speaking. The person is often forgetful and confused.                                              | 0.316<br>(0.206–0.437) |
| Acute hemorrhagic stroke severity level 4                             | Stroke, long-term consequences, severe                           | is confined to bed or a wheelchair, has difficulty speaking and depends on others for feeding, toileting and dressing.                                                                                                    | 0.552<br>(0.377–0.707) |
| Asymptomatic chronic hemorrhagic stroke                               | Asymptomatic                                                     | --                                                                                                                                                                                                                        | --                     |
| Asymptomatic and mild heart failure due to hypertensive heart disease | Heart failure, mild                                              | is short of breath and easily tires with moderate physical activity, such as walking uphill or more than a quarter-mile on level ground. The person feels comfortable at rest or during activities requiring less effort. | 0.041<br>(0.026–0.062) |
| Severe heart failure due to hypertensive heart disease                | Heart failure, severe                                            | is short of breath and feels tired when at rest. The person avoids any physical activity, for fear of worsening the breathing problems.                                                                                   | 0.179<br>(0.122–0.251) |
| Moderate heart failure due to hypertensive heart disease              | Heart failure, moderate                                          | is short of breath and easily tires with minimal physical activity, such as walking only a short distance. The person feels comfortable at rest but avoids moderate activity.                                             | 0.072<br>(0.047–0.103) |

**Appendix Table 6. GBD 2016 sequelae, health states, health state lay descriptions, and disability weights**

| Sequela                                                                                 | Health state name                                                    | Health state lay description                                                                                                                                                                                              | Disability weight      |
|-----------------------------------------------------------------------------------------|----------------------------------------------------------------------|---------------------------------------------------------------------------------------------------------------------------------------------------------------------------------------------------------------------------|------------------------|
| Asymptomatic and mild heart failure due to myocarditis                                  | Heart failure, mild                                                  | is short of breath and easily tires with moderate physical activity, such as walking uphill or more than a quarter-mile on level ground. The person feels comfortable at rest or during activities requiring less effort. | 0.041<br>(0.026–0.062) |
| Acute myocarditis                                                                       | Infectious disease, acute episode, moderate                          | has a fever and aches, and feels weak, which causes some difficulty with daily activities.                                                                                                                                | 0.051<br>(0.032–0.074) |
| Severe heart failure due to myocarditis                                                 | Heart failure, severe                                                | is short of breath and feels tired when at rest. The person avoids any physical activity, for fear of worsening the breathing problems.                                                                                   | 0.179<br>(0.122–0.251) |
| Moderate heart failure due to myocarditis                                               | Heart failure, moderate                                              | is short of breath and easily tires with minimal physical activity, such as walking only a short distance. The person feels comfortable at rest but avoids moderate activity.                                             | 0.072<br>(0.047–0.103) |
| Asymptomatic and mild heart failure due to alcoholic cardiomyopathy                     | Heart failure, mild                                                  | is short of breath and easily tires with moderate physical activity, such as walking uphill or more than a quarter-mile on level ground. The person feels comfortable at rest or during activities requiring less effort. | 0.041<br>(0.026–0.062) |
| Moderate heart failure due to alcoholic cardiomyopathy                                  | Heart failure, moderate                                              | is short of breath and easily tires with minimal physical activity, such as walking only a short distance. The person feels comfortable at rest but avoids moderate activity.                                             | 0.072<br>(0.047–0.103) |
| Severe heart failure due to alcoholic cardiomyopathy                                    | Heart failure, severe                                                | is short of breath and feels tired when at rest. The person avoids any physical activity, for fear of worsening the breathing problems.                                                                                   | 0.179<br>(0.122–0.251) |
| Moderate heart failure due to other cardiomyopathy                                      | Heart failure, moderate                                              | is short of breath and easily tires with minimal physical activity, such as walking only a short distance. The person feels comfortable at rest but avoids moderate activity.                                             | 0.072<br>(0.047–0.103) |
| Severe heart failure due to other cardiomyopathy                                        | Heart failure, severe                                                | is short of breath and feels tired when at rest. The person avoids any physical activity, for fear of worsening the breathing problems.                                                                                   | 0.179<br>(0.122–0.251) |
| Asymptomatic and mild heart failure due to other cardiomyopathy                         | Heart failure, mild                                                  | is short of breath and easily tires with moderate physical activity, such as walking uphill or more than a quarter-mile on level ground. The person feels comfortable at rest or during activities requiring less effort. | 0.041<br>(0.026–0.062) |
| Asymptomatic atrial fibrillation and flutter                                            | Asymptomatic                                                         | --                                                                                                                                                                                                                        | --                     |
| Symptomatic atrial fibrillation and flutter                                             | Cardiac conduction disorders and cardiac dysrhythmias                | has periods of rapid and irregular heartbeats and occasional fainting.                                                                                                                                                    | 0.224<br>(0.151–0.312) |
| Asymptomatic peripheral vascular disease                                                | Asymptomatic                                                         | --                                                                                                                                                                                                                        | --                     |
| Symptomatic claudication due to peripheral vascular disease                             | Claudication                                                         | has cramping pains in the legs after walking a medium distance. The pain goes away after a short rest.                                                                                                                    | 0.014<br>(0.007–0.025) |
| Moderate endocarditis                                                                   | Infectious disease, acute episode, moderate                          | has a fever and aches, and feels weak, which causes some difficulty with daily activities.                                                                                                                                | 0.051<br>(0.032–0.074) |
| Asymptomatic and mild heart failure due to endocarditis                                 | Heart failure, mild                                                  | is short of breath and easily tires with moderate physical activity, such as walking uphill or more than a quarter-mile on level ground. The person feels comfortable at rest or during activities requiring less effort. | 0.041<br>(0.026–0.062) |
| Severe endocarditis                                                                     | Infectious disease, acute episode, severe                            | has a high fever and pain, and feels very weak, which causes great difficulty with daily activities.                                                                                                                      | 0.133<br>(0.088–0.19)  |
| Severe heart failure due to endocarditis                                                | Heart failure, severe                                                | is short of breath and feels tired when at rest. The person avoids any physical activity, for fear of worsening the breathing problems.                                                                                   | 0.179<br>(0.122–0.251) |
| Moderate heart failure due to endocarditis                                              | Heart failure, moderate                                              | is short of breath and easily tires with minimal physical activity, such as walking only a short distance. The person feels comfortable at rest but avoids moderate activity.                                             | 0.072<br>(0.047–0.103) |
| Moderate other cardiovascular diseases                                                  | Heart failure, moderate                                              | is short of breath and easily tires with minimal physical activity, such as walking only a short distance. The person feels comfortable at rest but avoids moderate activity.                                             | 0.072<br>(0.047–0.103) |
| Severe heart failure due to other cardiovascular diseases                               | Heart failure, severe                                                | is short of breath and feels tired when at rest. The person avoids any physical activity, for fear of worsening the breathing problems.                                                                                   | 0.179<br>(0.122–0.251) |
| Asymptomatic other cardiovascular diseases                                              | Asymptomatic                                                         | --                                                                                                                                                                                                                        | --                     |
| Mild other cardiovascular diseases                                                      | Heart failure, mild                                                  | is short of breath and easily tires with moderate physical activity, such as walking uphill or more than a quarter-mile on level ground. The person feels comfortable at rest or during activities requiring less effort. | 0.041<br>(0.026–0.062) |
| Asymptomatic and mild heart failure due to other cardiovascular diseases                | Heart failure, mild                                                  | is short of breath and easily tires with moderate physical activity, such as walking uphill or more than a quarter-mile on level ground. The person feels comfortable at rest or during activities requiring less effort. | 0.041<br>(0.026–0.062) |
| Severe other cardiovascular diseases                                                    | Heart failure, severe                                                | is short of breath and feels tired when at rest. The person avoids any physical activity, for fear of worsening the breathing problems.                                                                                   | 0.179<br>(0.122–0.251) |
| Moderate heart failure due to other cardiovascular diseases                             | Heart failure, moderate                                              | is short of breath and easily tires with minimal physical activity, such as walking only a short distance. The person feels comfortable at rest but avoids moderate activity.                                             | 0.072<br>(0.047–0.103) |
| Severe heart failure due to severe chronic obstructive pulmonary disease                | Severe COPD and other chronic respiratory, with severe heart failure | --                                                                                                                                                                                                                        | --                     |
| Asymptomatic and mild heart failure due to severe chronic obstructive pulmonary disease | Severe COPD and other chronic respiratory, with mild heart failure   | --                                                                                                                                                                                                                        | --                     |



**Appendix Table 6. GBD 2016 sequelae, health states, health state lay descriptions, and disability weights**

| Sequela                                                                       | Health state name                                                      | Health state lay description                                                                                                                                                    | Disability weight      |
|-------------------------------------------------------------------------------|------------------------------------------------------------------------|---------------------------------------------------------------------------------------------------------------------------------------------------------------------------------|------------------------|
| Moderate chronic obstructive pulmonary disease                                | COPD and other chronic respiratory problems, moderate                  | has cough, wheezing and shortness of breath, even after light physical activity. The person feels tired and can walk only short distances or climb only a few stairs.           | 0.225<br>(0.153–0.31)  |
| Moderate heart failure due to severe chronic obstructive pulmonary disease    | Severe COPD and other chronic respiratory, with moderate heart failure | --                                                                                                                                                                              | --                     |
| Asymptomatic chronic obstructive pulmonary disease                            | Asymptomatic                                                           | --                                                                                                                                                                              | --                     |
| Mild chronic obstructive pulmonary disease                                    | COPD and other chronic respiratory problems, mild                      | has cough and shortness of breath after heavy physical activity, but is able to walk long distances and climb stairs.                                                           | 0.019<br>(0.011–0.033) |
| Severe chronic obstructive pulmonary disease without heart failure            | COPD and other chronic respiratory problems, severe                    | has cough, wheezing and shortness of breath all the time. The person has great difficulty walking even short distances or climbing any stairs, feels tired when at rest, and is | 0.408<br>(0.273–0.556) |
| Moderate heart failure due to severe silicosis                                | Severe COPD and other chronic respiratory, with moderate heart failure | --                                                                                                                                                                              | --                     |
| Mild silicosis                                                                | COPD and other chronic respiratory problems, mild                      | has cough and shortness of breath after heavy physical activity, but is able to walk long distances and climb stairs.                                                           | 0.019<br>(0.011–0.033) |
| Moderate silicosis                                                            | COPD and other chronic respiratory problems, moderate                  | has cough, wheezing and shortness of breath, even after light physical activity. The person feels tired and can walk only short distances or climb only a few stairs.           | 0.225<br>(0.153–0.31)  |
| Asymptomatic and mild heart failure due to severe silicosis                   | Severe COPD and other chronic respiratory, with mild heart failure     | --                                                                                                                                                                              | --                     |
| Severe silicosis without heart failure                                        | COPD and other chronic respiratory problems, severe                    | has cough, wheezing and shortness of breath all the time. The person has great difficulty walking even short distances or climbing any stairs, feels tired when at rest, and is | 0.408<br>(0.273–0.556) |
| Asymptomatic silicosis                                                        | Asymptomatic                                                           | --                                                                                                                                                                              | --                     |
| Severe heart failure due to severe silicosis                                  | Severe COPD and other chronic respiratory, with severe heart failure   | --                                                                                                                                                                              | --                     |
| Asymptomatic and mild heart failure due to severe asbestosis                  | Severe COPD and other chronic respiratory, with mild heart failure     | --                                                                                                                                                                              | --                     |
| Moderate heart failure due to severe asbestosis                               | Severe COPD and other chronic respiratory, with moderate heart failure | --                                                                                                                                                                              | --                     |
| Mild asbestosis                                                               | COPD and other chronic respiratory problems, mild                      | has cough and shortness of breath after heavy physical activity, but is able to walk long distances and climb stairs.                                                           | 0.019<br>(0.011–0.033) |
| Severe asbestosis without heart failure                                       | COPD and other chronic respiratory problems, severe                    | has cough, wheezing and shortness of breath all the time. The person has great difficulty walking even short distances or climbing any stairs, feels tired when at rest, and is | 0.408<br>(0.273–0.556) |
| Severe heart failure due to severe asbestosis                                 | Severe COPD and other chronic respiratory, with severe heart failure   | --                                                                                                                                                                              | --                     |
| Moderate asbestosis                                                           | COPD and other chronic respiratory problems, moderate                  | has cough, wheezing and shortness of breath, even after light physical activity. The person feels tired and can walk only short distances or climb only a few stairs.           | 0.225<br>(0.153–0.31)  |
| Asymptomatic asbestosis                                                       | Asymptomatic                                                           | --                                                                                                                                                                              | --                     |
| Severe coal workers pneumoconiosis without heart failure                      | COPD and other chronic respiratory problems, severe                    | has cough, wheezing and shortness of breath all the time. The person has great difficulty walking even short distances or climbing any stairs, feels tired when at rest, and is | 0.408<br>(0.273–0.556) |
| Mild coal workers pneumoconiosis                                              | COPD and other chronic respiratory problems, mild                      | has cough and shortness of breath after heavy physical activity, but is able to walk long distances and climb stairs.                                                           | 0.019<br>(0.011–0.033) |
| Severe heart failure due to severe coal workers pneumoconiosis                | Severe COPD and other chronic respiratory, with severe heart failure   | --                                                                                                                                                                              | --                     |
| Asymptomatic and mild heart failure due to severe coal workers pneumoconiosis | Severe COPD and other chronic respiratory, with mild heart failure     | --                                                                                                                                                                              | --                     |
| Asymptomatic coal workers pneumoconiosis                                      | Asymptomatic                                                           | --                                                                                                                                                                              | --                     |
| Moderate heart failure due to severe coal workers pneumoconiosis              | Severe COPD and other chronic respiratory, with moderate heart failure | --                                                                                                                                                                              | --                     |
| Moderate coal workers pneumoconiosis                                          | COPD and other chronic respiratory problems, moderate                  | has cough, wheezing and shortness of breath, even after light physical activity. The person feels tired and can walk only short distances or climb only a few stairs.           | 0.225<br>(0.153–0.31)  |
| Moderate other pneumoconiosis                                                 | COPD and other chronic respiratory problems, moderate                  | has cough, wheezing and shortness of breath, even after light physical activity. The person feels tired and can walk only short distances or climb only a few stairs.           | 0.225<br>(0.153–0.31)  |
| Asymptomatic other pneumoconiosis                                             | Asymptomatic                                                           | --                                                                                                                                                                              | --                     |
| Mild other pneumoconiosis                                                     | COPD and other chronic respiratory problems, mild                      | has cough and shortness of breath after heavy physical activity, but is able to walk long distances and climb stairs.                                                           | 0.019<br>(0.011–0.033) |
| Severe heart failure due to severe other pneumoconiosis                       | Severe COPD and other chronic respiratory, with severe heart failure   | --                                                                                                                                                                              | --                     |
| Severe other pneumoconiosis without heart failure                             | COPD and other chronic respiratory problems, severe                    | has cough, wheezing and shortness of breath all the time. The person has great difficulty walking even short distances or climbing any stairs, feels tired when at rest, and is | 0.408<br>(0.273–0.556) |
| Moderate heart failure due to severe other pneumoconiosis                     | Severe COPD and other chronic respiratory, with moderate heart failure | --                                                                                                                                                                              | --                     |
| Asymptomatic and mild heart failure due to severe other pneumoconiosis        | Severe COPD and other chronic respiratory, with mild heart failure     | --                                                                                                                                                                              | --                     |
| Controlled asthma                                                             | Asthma, controlled                                                     | has wheezing and cough once a month, which does not cause difficulty with daily activities.                                                                                     | 0.015<br>(0.007–0.026) |
| Uncontrolled asthma                                                           | Asthma, uncontrolled                                                   | has wheezing, cough and shortness of breath more than twice a week, which causes difficulty with daily activities and sometimes wakes the person at night.                      | 0.133<br>(0.086–0.192) |
| Asymptomatic asthma                                                           | Asymptomatic                                                           | --                                                                                                                                                                              | --                     |

**Appendix Table 6. GBD 2016 sequelae, health states, health state lay descriptions, and disability weights**

| Sequela                                                                                               | Health state name                                                      | Health state lay description                                                                                                                                                    | Disability weight      |
|-------------------------------------------------------------------------------------------------------|------------------------------------------------------------------------|---------------------------------------------------------------------------------------------------------------------------------------------------------------------------------|------------------------|
| Partially controlled asthma                                                                           | Asthma, partially controlled                                           | has wheezing and cough once a week, which causes some difficulty with daily activities.                                                                                         | 0.036<br>(0.022–0.055) |
| Severe heart failure due to severe interstitial lung disease and pulmonary sarcoidosis                | Severe COPD and other chronic respiratory, with severe heart failure   | --                                                                                                                                                                              | --                     |
| Severe interstitial lung disease and pulmonary sarcoidosis without heart failure                      | COPD and other chronic respiratory problems, severe                    | has cough, wheezing and shortness of breath all the time. The person has great difficulty walking even short distances or climbing any stairs, feels tired when at rest, and is | 0.408<br>(0.273–0.556) |
| Moderate heart failure due to severe interstitial lung disease and pulmonary sarcoidosis              | Severe COPD and other chronic respiratory, with moderate heart failure | --                                                                                                                                                                              | --                     |
| Mild interstitial lung disease and pulmonary sarcoidosis                                              | COPD and other chronic respiratory problems, mild                      | has cough and shortness of breath after heavy physical activity, but is able to walk long distances and climb stairs.                                                           | 0.019<br>(0.011–0.033) |
| Moderate interstitial lung disease and pulmonary sarcoidosis                                          | COPD and other chronic respiratory problems, moderate                  | has cough, wheezing and shortness of breath, even after light physical activity. The person feels tired and can walk only short distances or climb only a few stairs.           | 0.225<br>(0.153–0.31)  |
| Asymptomatic interstitial lung disease and pulmonary sarcoidosis                                      | Asymptomatic                                                           | --                                                                                                                                                                              | --                     |
| Asymptomatic and mild heart failure due to severe interstitial lung disease and pulmonary sarcoidosis | Severe COPD and other chronic respiratory, with mild heart failure     | --                                                                                                                                                                              | --                     |
| Other chronic respiratory diseases                                                                    | Post-COMO calculation for residuals (YLL/YLD ratio, other methods)     | --                                                                                                                                                                              | --                     |
| Cirrhosis and other chronic liver diseases due to hepatitis B, compensated                            | Asymptomatic                                                           | --                                                                                                                                                                              | --                     |
| Cirrhosis and other chronic liver diseases due to hepatitis B, decompensated                          | Decompensated cirrhosis of the liver                                   | has a swollen belly and swollen legs. The person feels weakness, fatigue and loss of appetite.                                                                                  | 0.178<br>(0.123–0.25)  |
| Cirrhosis and other chronic liver diseases due to hepatitis C, decompensated                          | Decompensated cirrhosis of the liver                                   | has a swollen belly and swollen legs. The person feels weakness, fatigue and loss of appetite.                                                                                  | 0.178<br>(0.123–0.25)  |
| Cirrhosis and other chronic liver diseases due to hepatitis C, compensated                            | Asymptomatic                                                           | --                                                                                                                                                                              | --                     |
| Cirrhosis and other chronic liver diseases due to alcohol, compensated                                | Asymptomatic                                                           | --                                                                                                                                                                              | --                     |
| Cirrhosis and other chronic liver diseases due to alcohol, decompensated                              | Decompensated cirrhosis of the liver                                   | has a swollen belly and swollen legs. The person feels weakness, fatigue and loss of appetite.                                                                                  | 0.178<br>(0.123–0.25)  |
| Cirrhosis and other chronic liver diseases due to other cause, compensated                            | Asymptomatic                                                           | --                                                                                                                                                                              | --                     |
| Cirrhosis and other chronic liver diseases due to other cause, decompensated                          | Decompensated cirrhosis of the liver                                   | has a swollen belly and swollen legs. The person feels weakness, fatigue and loss of appetite.                                                                                  | 0.178<br>(0.123–0.25)  |
| Severe anemia due to peptic ulcer disease                                                             | Anemia, severe                                                         | feels very weak, tired and short of breath, and has problems with activities that require physical effort or deep concentration.                                                | 0.149<br>(0.101–0.209) |
| Moderate symptomatic peptic ulcer disease with mild anemia                                            | Moderate abdominal pain with mild anemia                               | (combined DW)                                                                                                                                                                   | 0.118<br>(0.081–0.163) |
| Moderate symptomatic peptic ulcer disease with moderate anemia                                        | Moderate abdominal pain with moderate anemia                           | (combined DW)                                                                                                                                                                   | 0.16<br>(0.109–0.22)   |
| Moderate symptomatic peptic ulcer disease without anemia                                              | Abdominopelvic problem, moderate                                       | has pain in the belly and feels nauseous. The person has difficulties with daily activities.                                                                                    | 0.114<br>(0.078–0.159) |
| Mild anemia due to peptic ulcer disease                                                               | Anemia, mild                                                           | feels slightly tired and weak at times, but this does not interfere with normal daily activities.                                                                               | 0.004<br>(0.001–0.008) |
| Asymptomatic peptic ulcer disease without anemia                                                      | Asymptomatic                                                           | --                                                                                                                                                                              | --                     |
| Mild symptomatic peptic ulcer disease with severe anemia                                              | Mild abdominal pain with severe anemia                                 | (combined DW)                                                                                                                                                                   | --                     |
| Moderate anemia due to peptic ulcer disease                                                           | Anemia, moderate                                                       | feels moderate fatigue, weakness, and shortness of breath after exercise, making daily activities more difficult.                                                               | 0.052<br>(0.034–0.076) |
| Moderate symptomatic peptic ulcer disease with severe anemia                                          | Mild abdominal pain with severe anemia                                 | (combined DW)                                                                                                                                                                   | --                     |
| Asymptomatic peptic ulcer disease with moderate anemia                                                | Anemia, moderate                                                       | feels moderate fatigue, weakness, and shortness of breath after exercise, making daily activities more difficult.                                                               | 0.052<br>(0.034–0.076) |
| Asymptomatic peptic ulcer disease with severe anemia                                                  | Anemia, severe                                                         | feels very weak, tired and short of breath, and has problems with activities that require physical effort or deep concentration.                                                | 0.149<br>(0.101–0.209) |
| Mild symptomatic peptic ulcer disease without anemia                                                  | Abdominopelvic problem, mild                                           | has some pain in the belly that causes nausea but does not interfere with daily activities.                                                                                     | 0.011<br>(0.005–0.021) |
| Mild symptomatic peptic ulcer disease with moderate anemia                                            | Mild abdominal pain with moderate anemia                               | (combined DW)                                                                                                                                                                   | --                     |
| Asymptomatic peptic ulcer disease with mild anemia                                                    | Anemia, mild                                                           | feels slightly tired and weak at times, but this does not interfere with normal daily activities.                                                                               | 0.004<br>(0.001–0.008) |
| Mild symptomatic peptic ulcer disease with mild anemia                                                | Mild abdominal pain with mild anemia                                   | (combined DW)                                                                                                                                                                   | --                     |
| Mild anemia due to gastritis and duodenitis                                                           | Anemia, mild                                                           | feels slightly tired and weak at times, but this does not interfere with normal daily activities.                                                                               | 0.004<br>(0.001–0.008) |
| Mild symptomatic gastritis and duodenitis with moderate anemia                                        | Mild abdominal pain with moderate anemia                               | (combined DW)                                                                                                                                                                   | --                     |
| Asymptomatic gastritis and duodenitis with moderate anemia                                            | Anemia, moderate                                                       | feels moderate fatigue, weakness, and shortness of breath after exercise, making daily activities more difficult.                                                               | 0.052<br>(0.034–0.076) |
| Moderate symptomatic gastritis and duodenitis with severe anemia                                      | Moderate abdominal pain with severe anemia                             | (combined DW)                                                                                                                                                                   | 0.246<br>(0.171–0.334) |
| Moderate anemia due to gastritis and duodenitis                                                       | Anemia, moderate                                                       | feels moderate fatigue, weakness, and shortness of breath after exercise, making daily activities more difficult.                                                               | 0.052<br>(0.034–0.076) |
| Asymptomatic gastritis and duodenitis without anemia                                                  | Asymptomatic                                                           | --                                                                                                                                                                              | --                     |
| Moderate symptomatic gastritis and duodenitis with moderate anemia                                    | Moderate abdominal pain with moderate anemia                           | (combined DW)                                                                                                                                                                   | 0.16<br>(0.109–0.22)   |
| Asymptomatic gastritis and duodenitis with mild anemia                                                | Anemia, mild                                                           | feels slightly tired and weak at times, but this does not interfere with normal daily activities.                                                                               | 0.004<br>(0.001–0.008) |

**Appendix Table 6. GBD 2016 sequelae, health states, health state lay descriptions, and disability weights**

| Sequela                                                        | Health state name                                                  | Health state lay description                                                                                                                                                                                                           | Disability weight      |
|----------------------------------------------------------------|--------------------------------------------------------------------|----------------------------------------------------------------------------------------------------------------------------------------------------------------------------------------------------------------------------------------|------------------------|
| Asymptomatic gastritis and duodenitis with severe anemia       | Anemia, severe                                                     | feels very weak, tired and short of breath, and has problems with activities that require physical effort or deep concentration.                                                                                                       | 0.149<br>(0.101–0.209) |
| Mild symptomatic gastritis and duodenitis without anemia       | Abdominopelvic problem, mild                                       | has some pain in the belly that causes nausea but does not interfere with daily activities.                                                                                                                                            | 0.011<br>(0.005–0.021) |
| Mild symptomatic gastritis and duodenitis with severe anemia   | Mild abdominal pain with severe anemia                             | (combined DW)                                                                                                                                                                                                                          | --                     |
| Severe anemia due to gastritis and duodenitis                  | Anemia, severe                                                     | feels very weak, tired and short of breath, and has problems with activities that require physical effort or deep concentration.                                                                                                       | 0.149<br>(0.101–0.209) |
| Mild symptomatic gastritis and duodenitis with mild anemia     | Mild abdominal pain with mild anemia                               | (combined DW)                                                                                                                                                                                                                          | --                     |
| Moderate symptomatic gastritis and duodenitis with mild anemia | Moderate abdominal pain with mild anemia                           | (combined DW)                                                                                                                                                                                                                          | 0.118<br>(0.081–0.163) |
| Moderate symptomatic gastritis and duodenitis without anemia   | Abdominopelvic problem, moderate                                   | has pain in the belly and feels nauseous. The person has difficulties with daily activities.                                                                                                                                           | 0.114<br>(0.078–0.159) |
| Appendicitis                                                   | Abdominopelvic problem, severe                                     | has severe pain in the belly and feels nauseous. The person is anxious and unable to carry out daily activities.                                                                                                                       | 0.324<br>(0.22–0.442)  |
| Paralytic ileus and intestinal obstruction                     | Abdominopelvic problem, severe                                     | has severe pain in the belly and feels nauseous. The person is anxious and unable to carry out daily activities.                                                                                                                       | 0.324<br>(0.22–0.442)  |
| Asymptomatic inguinal, femoral, and abdominal hernia           | Asymptomatic                                                       | --                                                                                                                                                                                                                                     | --                     |
| Mild symptomatic inguinal, femoral and abdominal hernia        | Abdominopelvic problem, mild                                       | has some pain in the belly that causes nausea but does not interfere with daily activities.                                                                                                                                            | 0.011<br>(0.005–0.021) |
| Moderate symptomatic inguinal, femoral and abdominal hernia    | Abdominopelvic problem, moderate                                   | has pain in the belly and feels nauseous. The person has difficulties with daily activities.                                                                                                                                           | 0.114<br>(0.078–0.159) |
| Severe symptomatic inguinal, femoral and abdominal hernia      | Abdominopelvic problem, severe                                     | has severe pain in the belly and feels nauseous. The person is anxious and unable to carry out daily activities.                                                                                                                       | 0.324<br>(0.22–0.442)  |
| Asymptomatic Crohn's disease                                   | Asymptomatic                                                       | --                                                                                                                                                                                                                                     | --                     |
| Asymptomatic ulcerative colitis                                | Asymptomatic                                                       | --                                                                                                                                                                                                                                     | --                     |
| Ulcerative colitis                                             | Crohn disease or ulcerative colitis                                | has cramping abdominal pain, has diarrhea several times a day, and feels very tired for two months every year. When the person does not have symptoms, there is anxiety about them returning.                                          | 0.231<br>(0.156–0.32)  |
| Crohn's disease                                                | Crohn disease or ulcerative colitis                                | has cramping abdominal pain, has diarrhea several times a day, and feels very tired for two months every year. When the person does not have symptoms, there is anxiety about them returning.                                          | 0.231<br>(0.156–0.32)  |
| Vascular intestinal disorders                                  | Abdominopelvic problem, severe                                     | has severe pain in the belly and feels nauseous. The person is anxious and unable to carry out daily activities.                                                                                                                       | 0.324<br>(0.22–0.442)  |
| Asymptomatic gallbladder and biliary diseases                  | Asymptomatic                                                       | --                                                                                                                                                                                                                                     | --                     |
| Severe symptomatic episodes gallbladder and biliary diseases   | Abdominopelvic problem, severe                                     | has severe pain in the belly and feels nauseous. The person is anxious and unable to carry out daily activities.                                                                                                                       | 0.324<br>(0.22–0.442)  |
| Mild symptomatic episodes gallbladder and biliary diseases     | Abdominopelvic problem, mild                                       | has some pain in the belly that causes nausea but does not interfere with daily activities.                                                                                                                                            | 0.011<br>(0.005–0.021) |
| Moderate symptomatic episodes gallbladder and biliary diseases | Abdominopelvic problem, moderate                                   | has pain in the belly and feels nauseous. The person has difficulties with daily activities.                                                                                                                                           | 0.114<br>(0.078–0.159) |
| Moderate pancreatitis episodes                                 | Abdominopelvic problem, moderate                                   | has pain in the belly and feels nauseous. The person has difficulties with daily activities.                                                                                                                                           | 0.114<br>(0.078–0.159) |
| Mild pancreatitis episodes                                     | Abdominopelvic problem, mild                                       | has some pain in the belly that causes nausea but does not interfere with daily activities.                                                                                                                                            | 0.011<br>(0.005–0.021) |
| Severe pancreatitis episodes                                   | Abdominopelvic problem, severe                                     | has severe pain in the belly and feels nauseous. The person is anxious and unable to carry out daily activities.                                                                                                                       | 0.324<br>(0.22–0.442)  |
| Other digestive diseases                                       | Post-COMO calculation for residuals (YLL/YLD ratio, other methods) | --                                                                                                                                                                                                                                     | --                     |
| Severe Alzheimer disease and other dementias                   | Dementia, severe                                                   | has complete memory loss; no longer recognizes close family members; and requires help with all daily activities.                                                                                                                      | 0.449<br>(0.304–0.595) |
| Mild Alzheimer disease and other dementias                     | Dementia, mild                                                     | has some trouble remembering recent events, and finds it hard to concentrate and make decisions and plans.                                                                                                                             | 0.069<br>(0.046–0.099) |
| Moderate Alzheimer disease and other dementias                 | Dementia, moderate                                                 | has memory problems and confusion, feels disoriented, at times hears voices that are not real, and needs help with some daily activities.                                                                                              | 0.377<br>(0.252–0.508) |
| Mild Parkinson disease                                         | Parkinson disease, mild                                            | has mild tremors and moves a little slowly, but is able to walk and do daily activities without assistance.                                                                                                                            | 0.01<br>(0.005–0.019)  |
| Moderate Parkinson disease                                     | Parkinson disease, moderate                                        | has moderate tremors and moves slowly, which causes some difficulty in walking and daily activities. The person has some trouble swallowing, talking, sleeping, and                                                                    | 0.267<br>(0.181–0.372) |
| Severe Parkinson disease                                       | Parkinson disease, severe                                          | has severe tremors and moves very slowly, which causes great difficulty in walking and daily activities. The person falls easily and has a lot of difficulty talking, swallowing, sleeping, and remembering things.                    | 0.575<br>(0.396–0.73)  |
| Severe epilepsy                                                | Epilepsy, seizures >= once a month                                 | has sudden seizures one or more times each month, with violent muscle contractions and stiffness, loss of consciousness, and loss of urine or bowel control. Between seizures the person has memory loss and difficulty concentrating. | 0.552<br>(0.375–0.71)  |
| Less severe epilepsy                                           | Epilepsy, seizures 1-11 per year                                   | has sudden seizures two to five times a year, with violent muscle contractions and stiffness, loss of consciousness, and loss of urine or bowel control.                                                                               | 0.263<br>(0.173–0.367) |



**Appendix Table 6. GBD 2016 sequelae, health states, health state lay descriptions, and disability weights**

| Sequela                                                                                                   | Health state name                                                                | Health state lay description                                                                                                                                                         | Disability weight      |
|-----------------------------------------------------------------------------------------------------------|----------------------------------------------------------------------------------|--------------------------------------------------------------------------------------------------------------------------------------------------------------------------------------|------------------------|
| Seizure-free, treated epilepsy                                                                            | Generic uncomplicated disease: worry and daily medication                        | has a chronic disease that requires medication every day and causes some worry but minimal interference with daily activities.                                                       | 0.049<br>(0.031–0.072) |
| Mild multiple sclerosis                                                                                   | Multiple sclerosis, mild                                                         | has mild loss of feeling in one hand, is a little unsteady while walking, has slight loss of vision in one eye, and often needs to urinate urgently.                                 | 0.183<br>(0.124–0.253) |
| Severe multiple sclerosis                                                                                 | Multiple sclerosis, severe                                                       | has slurred speech and difficulty swallowing. The person has weak arms and hands, very limited and stiff leg movement, has loss of vision in both eyes and cannot control urinating. | 0.719<br>(0.534–0.858) |
| Moderate multiple sclerosis                                                                               | Multiple sclerosis, moderate                                                     | needs help walking, has difficulty with writing and arm coordination, has loss of vision in one eye and cannot control urinating.                                                    | 0.463<br>(0.313–0.613) |
| Asymptomatic multiple sclerosis                                                                           | Asymptomatic                                                                     | --                                                                                                                                                                                   | --                     |
| Severe respiratory problems and speech problems due to motor neuron disease                               | Severe respiratory and speech problems                                           | (combined DW)                                                                                                                                                                        | 0.438<br>(0.304–0.581) |
| Moderate respiratory problems and speech problems due to motor neuron disease                             | Moderate respiratory and speech problems                                         | (combined DW)                                                                                                                                                                        | 0.265<br>(0.184–0.36)  |
| Mild respiratory problems and speech problems due to motor neuron disease                                 | Mild respiratory and speech problems                                             | (combined DW)                                                                                                                                                                        | 0.069<br>(0.043–0.106) |
| Severe motor impairment and speech problems due to motor neuron disease                                   | Severe motor impairment and speech problems                                      | (combined DW)                                                                                                                                                                        | 0.432<br>(0.306–0.572) |
| Moderate motor impairment and speech problems due to motor neuron disease                                 | Moderate motor impairment and speech problems                                    | (combined DW)                                                                                                                                                                        | 0.109<br>(0.071–0.158) |
| Mild motor impairment and speech problems due to motor neuron disease                                     | Mild motor impairment and speech problems                                        | (combined DW)                                                                                                                                                                        | 0.061<br>(0.038–0.094) |
| Severe motor impairment and severe respiratory problems due to motor neuron disease                       | Severe motor impairment and severe respiratory problems                          | (combined DW)                                                                                                                                                                        | 0.641<br>(0.47–0.796)  |
| Severe motor impairment and mild respiratory problems due to motor neuron disease                         | Severe motor impairment and mild respiratory problems                            | (combined DW)                                                                                                                                                                        | 0.413<br>(0.286–0.553) |
| Moderate motor impairment, severe respiratory problems, and speech problems due to motor neuron disease   | Moderate motor impairment with severe respiratory problems and speech problems   | (combined DW)                                                                                                                                                                        | 0.472<br>(0.339–0.611) |
| Moderate motor impairment and severe respiratory problems due to motor neuron disease                     | Moderate motor impairment and severe respiratory problems                        | (combined DW)                                                                                                                                                                        | 0.414<br>(0.281–0.559) |
| Moderate motor impairment and moderate respiratory problems due to motor neuron disease                   | Moderate motor impairment and moderate respiratory problems                      | (combined DW)                                                                                                                                                                        | 0.233<br>(0.16–0.322)  |
| Moderate motor impairment and mild respiratory problems due to motor neuron disease                       | Moderate motor impairment and mild respiratory problems                          | (combined DW)                                                                                                                                                                        | 0.029<br>(0.015–0.051) |
| Mild motor impairment and severe respiratory problems due to motor neuron disease                         | Mild motor impairment and severe respiratory problems                            | (combined DW)                                                                                                                                                                        | 0.443<br>(0.311–0.587) |
| Mild motor impairment and mild respiratory problems due to motor neuron disease                           | Mild motor impairment and mild respiratory problems                              | (combined DW)                                                                                                                                                                        | 0.079<br>(0.05–0.117)  |
| Severe motor impairment, severe respiratory problems, and speech problems due to motor neuron disease     | Severe motor impairment with severe respiratory problems and speech problems     | (combined DW)                                                                                                                                                                        | 0.659<br>(0.495–0.809) |
| Severe motor impairment, moderate respiratory problems, and speech problems due to motor neuron disease   | Severe motor impairment with moderate respiratory problems and speech problems   | (combined DW)                                                                                                                                                                        | 0.557<br>(0.412–0.705) |
| Severe motor impairment and moderate respiratory problems due to motor neuron disease                     | Severe motor impairment and moderate respiratory problems                        | (combined DW)                                                                                                                                                                        | 0.534<br>(0.382–0.685) |
| Moderate motor impairment due to motor neuron disease                                                     | Motor impairment, moderate                                                       | has some difficulty in moving around, and difficulty in lifting and holding objects, dressing and sitting upright, but is able to walk without help.                                 | 0.061<br>(0.04–0.089)  |
| Moderate motor impairment, mild respiratory problems, and speech problems due to motor neuron disease     | Moderate motor impairment with mild respiratory problems and speech problems     | (combined DW)                                                                                                                                                                        | 0.126<br>(0.081–0.183) |
| Mild respiratory problems due to motor neuron disease                                                     | COPD and other chronic respiratory problems, mild                                | has cough and shortness of breath after heavy physical activity, but is able to walk long distances and climb stairs.                                                                | 0.019<br>(0.011–0.033) |
| Severe respiratory problems due to motor neuron disease                                                   | COPD and other chronic respiratory problems, severe                              | has cough, wheezing and shortness of breath all the time. The person has great difficulty walking even short distances or climbing any stairs, feels tired when at rest, and is      | 0.408<br>(0.273–0.556) |
| Moderate respiratory problems due to motor neuron disease                                                 | COPD and other chronic respiratory problems, moderate                            | has cough, wheezing and shortness of breath, even after light physical activity. The person feels tired and can walk only short distances or climb only a few stairs.                | 0.225<br>(0.153–0.31)  |
| Mild motor impairment due to motor neuron disease                                                         | Motor impairment, mild                                                           | has some difficulty in moving around but is able to walk without help.                                                                                                               | 0.01<br>(0.005–0.019)  |
| Mild motor impairment, mild respiratory problems, and speech problems due to motor neuron disease         | Mild motor impairment with mild respiratory problems and speech problems         | (combined dw)                                                                                                                                                                        | 0.079<br>(0.049–0.123) |
| Mild motor impairment, moderate respiratory problems, and speech problems due to motor neuron disease     | Mild motor impairment with moderate respiratory problems and speech problems     | (combined dw)                                                                                                                                                                        | 0.272<br>(0.191–0.369) |
| Speech problems due to motor neuron disease                                                               | Speech problems                                                                  | has difficulty speaking, and others find it difficult to understand.                                                                                                                 | 0.051<br>(0.032–0.078) |
| Severe motor impairment due to motor neuron disease                                                       | Motor impairment, severe                                                         | is unable to move around without help, and is not able to lift or hold objects, get dressed or sit upright.                                                                          | 0.402<br>(0.268–0.545) |
| Diagnosis of motor neuron disease                                                                         | Generic uncomplicated disease: anxiety about diagnosis                           | has a disease diagnosis that causes some worry but minimal interference with daily activities.                                                                                       | 0.012<br>(0.006–0.023) |
| Severe motor impairment, mild respiratory problems, and speech problems due to motor neuron disease       | Severe motor impairment with mild respiratory problems and speech problems       | (combined DW)                                                                                                                                                                        | 0.443<br>(0.316–0.58)  |
| Moderate motor impairment, moderate respiratory problems, and speech problems due to motor neuron disease | Moderate motor impairment with moderate respiratory problems and speech problems | (combined DW)                                                                                                                                                                        | 0.309<br>(0.221–0.414) |
| Mild motor impairment, severe respiratory problems and speech problems due to motor neuron disease        | Mild motor impairment with severe respiratory problems and speech problems       | (combined DW)                                                                                                                                                                        | 0.444<br>(0.311–0.585) |
| Asymptomatic medication overuse headache due to migraine                                                  | Asymptomatic                                                                     | --                                                                                                                                                                                   | --                     |

**Appendix Table 6. GBD 2016 sequelae, health states, health state lay descriptions, and disability weights**

| Sequela                                                               | Health state name                                                  | Health state lay description                                                                                                                                                                                                                                                                     | Disability weight      |
|-----------------------------------------------------------------------|--------------------------------------------------------------------|--------------------------------------------------------------------------------------------------------------------------------------------------------------------------------------------------------------------------------------------------------------------------------------------------|------------------------|
| Symptomatic migraine                                                  | Headache, migraine                                                 | has severe, throbbing head pain and nausea that cause great difficulty in daily activities and sometimes confine the person to bed. Moving around, light, and noise make it worse.                                                                                                               | 0.441<br>(0.294–0.588) |
| Symptomatic medication overuse headache due to migraine               | Headache, medication overuse                                       | has daily headaches, felt as dull pain and often lasting all day, with poor sleep, nausea and fatigue. The person takes medicine for the headaches, which provides little relief but is needed to avoid having worse symptoms.                                                                   | 0.223<br>(0.146–0.313) |
| Asymptomatic migraine                                                 | Asymptomatic                                                       | --                                                                                                                                                                                                                                                                                               | --                     |
| Symptomatic medication overuse headache due to tension-type headache  | Headache, medication overuse                                       | has daily headaches, felt as dull pain and often lasting all day, with poor sleep, nausea and fatigue. The person takes medicine for the headaches, which provides little relief but is needed to avoid having worse symptoms.                                                                   | 0.223<br>(0.146–0.313) |
| Asymptomatic medication overuse headache due to tension-type headache | Asymptomatic                                                       | --                                                                                                                                                                                                                                                                                               | --                     |
| Asymptomatic tension-type headache                                    | Asymptomatic                                                       | --                                                                                                                                                                                                                                                                                               | --                     |
| Symptomatic tension-type headache                                     | Headache, tension-type                                             | has a moderate headache that also affects the neck, which causes difficulty in daily activities.                                                                                                                                                                                                 | 0.037<br>(0.022–0.057) |
| Other neurological disorders                                          | Post-COMO calculation for residuals (YLL/YLD ratio, other methods) | --                                                                                                                                                                                                                                                                                               | --                     |
| Guillain-Barré syndrome due to other neurological disorders           | Spinal cord lesion below neck level (treated)                      | is paralyzed from the waist down, cannot feel or move the legs and has difficulties with urine and bowel control. The person uses a wheelchair to move around.                                                                                                                                   | 0.296<br>(0.198–0.414) |
| Schizophrenia acute state                                             | Schizophrenia, acute state                                         | hears and sees things that are not real and is afraid, confused, and sometimes violent. The person has great difficulty with communication and daily activities, and sometimes wants to harm or kill himself (or herself).                                                                       | 0.778<br>(0.606–0.9)   |
| Schizophrenia residual state                                          | Schizophrenia, residual state                                      | hears and sees things that are not real and has trouble communicating. The person can be forgetful, has difficulty with daily activities, and thinks about hurting himself (or drinks alcohol daily and has difficulty controlling the urge to drink. When sober, the person functions normally. | 0.588<br>(0.411–0.754) |
| Very mild alcohol dependence                                          | Alcohol use disorder, very mild                                    | is very slow in developing physically and mentally, which causes great difficulty in daily activities.                                                                                                                                                                                           | 0.123<br>(0.082–0.177) |
| Severe fetal alcohol syndrome                                         | Fetal alcohol syndrome, severe                                     | drinks a lot of alcohol and sometimes has difficulty controlling the urge to drink. While intoxicated, the person has difficulty performing daily activities.                                                                                                                                    | 0.179<br>(0.119–0.257) |
| Mild alcohol dependence                                               | Alcohol use disorder, mild                                         | is slow in developing physically and mentally, which causes some difficulty in daily activities.                                                                                                                                                                                                 | 0.235<br>(0.16–0.327)  |
| Moderate fetal alcohol syndrome                                       | Fetal alcohol syndrome, moderate                                   | is a little slow in developing physically and mentally, which causes some difficulty in learning but no other difficulties in daily activities.                                                                                                                                                  | 0.056<br>(0.035–0.083) |
| Asymptomatic fetal alcohol syndrome                                   | Asymptomatic                                                       | --                                                                                                                                                                                                                                                                                               | --                     |
| Asymptomatic alcohol dependence                                       | Asymptomatic                                                       | --                                                                                                                                                                                                                                                                                               | --                     |
| Mild fetal alcohol syndrome                                           | Fetal alcohol syndrome, mild                                       | gets drunk almost every day and is unable to control the urge to drink. Drinking and recovering replace most daily activities. The person has difficulty thinking, remembering and communicating, and feels constant pain and fatigue.                                                           | 0.016<br>(0.008–0.03)  |
| Severe alcohol dependence                                             | Alcohol use disorder, severe                                       | drinks a lot, gets drunk almost every week and has great difficulty controlling the urge to drink. Drinking and recovering cause great difficulty in daily activities, sleep loss,                                                                                                               | 0.57<br>(0.396–0.732)  |
| Moderate alcohol dependence                                           | Alcohol use disorder, moderate                                     | uses heroin daily and has difficulty controlling the habit. When the effects wear off, the person feels severe nausea, agitation, vomiting and fever. The person has a lot of difficulty in daily activities.                                                                                    | 0.373<br>(0.248–0.508) |
| Asymptomatic opioid dependence                                        | Asymptomatic                                                       | --                                                                                                                                                                                                                                                                                               | --                     |
| Severe opioid dependence                                              | Heroin and other opioid dependence                                 | uses heroin (or methadone) daily and has difficulty controlling the habit. When not using, the person functions normally.                                                                                                                                                                        | 0.697<br>(0.51–0.843)  |
| Mild opioid dependence                                                | Heroin and other opioid dependence, mild                           | uses cocaine at least once a week and has some difficulty controlling the habit. When not using, the person functions normally.                                                                                                                                                                  | 0.335<br>(0.221–0.473) |
| Mild cocaine dependence                                               | Cocaine dependence, mild                                           | --                                                                                                                                                                                                                                                                                               | 0.116<br>(0.074–0.165) |
| Asymptomatic cocaine dependence                                       | Asymptomatic                                                       | --                                                                                                                                                                                                                                                                                               | --                     |
| Severe cocaine dependence                                             | Cocaine dependence                                                 | uses cocaine and has difficulty controlling the habit. The person sometimes has mood swings, anxiety, paranoia, hallucinations and sleep problems, and has some difficulty in daily activities.                                                                                                  | 0.479<br>(0.324–0.634) |
| Severe amphetamine dependence                                         | Amphetamine dependence                                             | uses stimulants (drugs) and has difficulty controlling the habit. The person sometimes has depression, hallucinations and mood swings, and has difficulty in daily activities.                                                                                                                   | 0.486<br>(0.329–0.637) |
| Mild amphetamine dependence                                           | Amphetamine dependence, mild                                       | uses stimulants (drugs) at least once a week and has some difficulty controlling the habit. When not using, the person functions normally.                                                                                                                                                       | 0.079<br>(0.051–0.114) |
| Asymptomatic amphetamine dependence                                   | Asymptomatic                                                       | --                                                                                                                                                                                                                                                                                               | --                     |
| Asymptomatic cannabis dependence                                      | Asymptomatic                                                       | --                                                                                                                                                                                                                                                                                               | --                     |
| Mild cannabis dependence                                              | Cannabis dependence, mild                                          | uses marijuana at least once a week and has some difficulty controlling the habit. When not using, the person functions normally.                                                                                                                                                                | 0.039<br>(0.024–0.06)  |

**Appendix Table 6. GBD 2016 sequelae, health states, health state lay descriptions, and disability weights**

| Sequela                                                              | Health state name                                      | Health state lay description                                                                                                                                                                                    | Disability weight      |
|----------------------------------------------------------------------|--------------------------------------------------------|-----------------------------------------------------------------------------------------------------------------------------------------------------------------------------------------------------------------|------------------------|
| Severe cannabis dependence                                           | Cannabis dependence                                    | uses marijuana daily and has difficulty controlling the habit. The person sometimes has mood swings, anxiety and hallucinations, and has some difficulty in daily activities.                                   | 0.266<br>(0.178–0.364) |
| Other drug use disorders                                             | Cocaine dependence, mild                               | uses cocaine at least once a week and has some difficulty controlling the habit. When not using, the person functions normally.                                                                                 | 0.116<br>(0.074–0.165) |
| Severe major depressive disorder                                     | Major depressive disorder, severe episode              | has overwhelming, constant sadness and cannot function in daily life. The person sometimes loses touch with reality and wants to harm or kill himself (or herself).                                             | 0.658<br>(0.477–0.807) |
| Moderate major depressive disorder                                   | Major depressive disorder, moderate episode            | has constant sadness and has lost interest in usual activities. The person has some difficulty in daily life, sleeps badly, has trouble concentrating, and sometimes thinks about harming himself (or herself). | 0.396<br>(0.267–0.531) |
| Major depressive disorder, currently without symptoms                | Asymptomatic                                           | --                                                                                                                                                                                                              | --                     |
| Mild major depressive disorder                                       | Major depressive disorder, mild episode                | feels persistent sadness and has lost interest in usual activities. The person sometimes sleeps badly, feels tired, or has trouble concentrating but still manages to function in daily life with extra effort. | 0.145<br>(0.099–0.209) |
| Dysthymia, currently without symptoms                                | Asymptomatic                                           | --                                                                                                                                                                                                              | --                     |
| Symptomatic dysthymia                                                | Major depressive disorder, mild episode                | feels persistent sadness and has lost interest in usual activities. The person sometimes sleeps badly, feels tired, or has trouble concentrating but still manages to function in daily life with extra effort. | 0.145<br>(0.099–0.209) |
| Bipolar disorder manic state                                         | Bipolar disorder, manic episode                        | is hyperactive, hears and believes things that are not real, and engages in impulsive and aggressive behavior that endanger the person and others.                                                              | 0.492<br>(0.341–0.646) |
| Bipolar disorder residual state                                      | Bipolar disorder, residual state                       | has mild mood swings, irritability and some difficulty with daily activities.                                                                                                                                   | 0.032<br>(0.018–0.051) |
| Bipolar disorder depressive state                                    | Major depressive disorder, moderate episode            | has constant sadness and has lost interest in usual activities. The person has some difficulty in daily life, sleeps badly, has trouble concentrating, and sometimes thinks about harming himself (or herself). | 0.396<br>(0.267–0.531) |
| Anxiety disorders, currently without symptoms                        | Asymptomatic                                           | --                                                                                                                                                                                                              | --                     |
| Moderate anxiety disorders                                           | Anxiety disorders, moderate                            | feels anxious and worried, which makes it difficult to concentrate, remember things, and sleep. The person tires easily and finds it difficult to perform daily activities.                                     | 0.133<br>(0.091–0.186) |
| Severe anxiety disorders                                             | Anxiety disorders, severe                              | constantly feels very anxious and worried, which makes it difficult to concentrate, remember things, and sleep. The person has lost pleasure in life and thinks about suicide.                                  | 0.523<br>(0.362–0.677) |
| Mild anxiety disorders                                               | Anxiety disorders, mild                                | feels mildly anxious and worried, which makes it slightly difficult to concentrate, remember things, and sleep. The person tires easily but is able to perform daily activities.                                | 0.03<br>(0.018–0.046)  |
| Anorexia nervosa                                                     | Anorexia nervosa                                       | feels an overwhelming need to starve and exercises excessively to lose weight. The person is very thin, weak and anxious.                                                                                       | 0.224<br>(0.15–0.312)  |
| Bulimia nervosa                                                      | Bulimia nervosa                                        | has uncontrolled overeating followed by guilt, starving, and vomiting to lose weight.                                                                                                                           | 0.223<br>(0.149–0.311) |
| Autism with profound intellectual disability                         | Autism with profound intellectual disability           | (combined DW)                                                                                                                                                                                                   | --                     |
| Autism with moderate intellectual disability                         | Autism with moderate intellectual disability           | (combined DW)                                                                                                                                                                                                   | --                     |
| Autism with mild intellectual disability                             | Autism with mild intellectual disability               | (combined DW)                                                                                                                                                                                                   | --                     |
| Autism with borderline intellectual disability                       | Autism with borderline intellectual disability         | (combined DW)                                                                                                                                                                                                   | --                     |
| Autism without intellectual disability                               | Autism without intellectual disability                 | (combined DW)                                                                                                                                                                                                   | --                     |
| Autism with severe intellectual disability                           | Autism with severe intellectual disability             | (combined DW)                                                                                                                                                                                                   | --                     |
| Asperger syndrome and other autistic spectrum disorders              | Asperger syndrome                                      | has difficulty interacting with other people, and is slow to understand or respond to questions. The person is often preoccupied with one thing and has some difficulty with basic daily activities.            | 0.104<br>(0.071–0.147) |
| Symptomatic attention-deficit/hyperactivity disorder                 | Attention deficit hyperactivity disorder               | is hyperactive and has difficulty concentrating, remembering things, and completing tasks.                                                                                                                      | 0.045<br>(0.028–0.066) |
| Attention-deficit/hyperactivity disorder, currently without symptoms | Asymptomatic                                           | --                                                                                                                                                                                                              | --                     |
| Symptomatic conduct disorder                                         | Conduct disorder                                       | has frequent behavior problems, which are sometimes violent. The person often has difficulty interacting with other people and feels irritable.                                                                 | 0.241<br>(0.159–0.341) |
| Conduct disorder, currently without symptoms                         | Asymptomatic                                           | --                                                                                                                                                                                                              | --                     |
| Mild idiopathic developmental intellectual disability                | Intellectual disability / mental retardation, mild     | has low intelligence and is slow in learning at school. As an adult, the person can live independently, but often needs help to raise children and can only work at simple supervised jobs.                     | 0.043<br>(0.026–0.064) |
| Borderline idiopathic developmental intellectual disability          | Borderline intellectual functioning                    | is slow in learning at school. As an adult, the person has some difficulty doing complex or unfamiliar tasks but otherwise functions independently.                                                             | 0.011<br>(0.005–0.02)  |
| Profound idiopathic developmental intellectual disability            | Intellectual disability / mental retardation, profound | has very low intelligence, has almost no language, and does not understand even the most basic requests or instructions. The person requires constant supervision and help for all activities.                  | 0.2<br>(0.133–0.283)   |

**Appendix Table 6. GBD 2016 sequelae, health states, health state lay descriptions, and disability weights**

| Sequela                                                                                | Health state name                                                                                    | Health state lay description                                                                                                                                                                                                              | Disability weight      |
|----------------------------------------------------------------------------------------|------------------------------------------------------------------------------------------------------|-------------------------------------------------------------------------------------------------------------------------------------------------------------------------------------------------------------------------------------------|------------------------|
| Moderate idiopathic developmental intellectual disability                              | Intellectual disability / mental retardation, moderate                                               | has low intelligence, and is slow in learning to speak and to do even simple tasks. As an adult, the person requires a lot of support to live independently and raise children. The person can only work at the simplest supervised jobs. | 0.1<br>(0.066–0.142)   |
| Severe idiopathic developmental intellectual disability                                | Intellectual disability / mental retardation, severe                                                 | has very low intelligence and cannot speak more than a few words, needs constant supervision and help with most daily activities, and can do only the simplest tasks.                                                                     | 0.16<br>(0.107–0.226)  |
| Other mental disorders, currently without symptoms                                     | Asymptomatic                                                                                         | --                                                                                                                                                                                                                                        | --                     |
| Moderate other mental disorders                                                        | Anxiety disorders, moderate                                                                          | feels anxious and worried, which makes it difficult to concentrate, remember things, and sleep. The person tires easily and finds it difficult to perform daily activities.                                                               | 0.133<br>(0.091–0.186) |
| Severe other mental disorders                                                          | Anxiety disorders, severe                                                                            | constantly feels very anxious and worried, which makes it difficult to concentrate, remember things and sleep. The person has lost pleasure in life and thinks about suicide.                                                             | 0.523<br>(0.362–0.677) |
| Mild other mental disorders                                                            | Anxiety disorders, mild                                                                              | feels mildly anxious and worried, which makes it slightly difficult to concentrate, remember things, and sleep. The person tires easily but is able to perform daily activities.                                                          | 0.03<br>(0.018–0.046)  |
| Moderate vision impairment due to diabetes mellitus                                    | Distance vision, moderate impairment                                                                 | has vision problems that make it difficult to recognize faces or objects across a room.                                                                                                                                                   | 0.031<br>(0.019–0.049) |
| Diabetic foot due to neuropathy                                                        | Diabetic neuropathy with diabetic foot                                                               | --                                                                                                                                                                                                                                        | --                     |
| Severe vision impairment due to diabetes mellitus                                      | Distance vision, severe impairment                                                                   | has severe vision loss, which causes difficulty in daily activities, some emotional impact (for example worry), and some difficulty going outside the home without assistance.                                                            | 0.184<br>(0.125–0.258) |
| Diabetic neuropathy                                                                    | Diabetic neuropathy                                                                                  | has pain, tingling and numbness in the arms, legs, hands and feet. The person sometimes gets cramps and muscle weakness.                                                                                                                  | 0.133<br>(0.089–0.187) |
| Uncomplicated diabetes mellitus                                                        | Generic uncomplicated disease: worry and daily medication                                            | has a chronic disease that requires medication every day and causes some worry but minimal interference with daily activities.                                                                                                            | 0.049<br>(0.031–0.072) |
| Diabetic neuropathy and amputation with treatment                                      | Diabetic neuropathy with treated amputation                                                          | --                                                                                                                                                                                                                                        | --                     |
| Diabetic neuropathy and amputation without treatment                                   | Diabetic neuropathy with untreated amputation                                                        | --                                                                                                                                                                                                                                        | --                     |
| Blindness due to diabetes mellitus                                                     | Distance vision blindness                                                                            | is completely blind, which causes great difficulty in some daily activities, worry and anxiety, and great difficulty going outside the home without assistance.                                                                           | 0.187<br>(0.124–0.26)  |
| Acute glomerulonephritis                                                               | Infectious disease, acute episode, moderate                                                          | has a fever and aches, and feels weak, which causes some difficulty with daily activities.                                                                                                                                                | 0.051<br>(0.032–0.074) |
| Stage V chronic kidney disease untreated and severe anemia due to diabetes mellitus    | Severe anemia and terminal phase, without medication (for cancers, end-stage kidney/liver disease)   | (combined DW)                                                                                                                                                                                                                             | 0.631<br>(0.456–0.782) |
| End-stage renal disease after transplant due to diabetes mellitus                      | End-stage renal disease, with kidney transplant                                                      | sometimes feels tired and down, and has some difficulty with daily activities.                                                                                                                                                            | 0.024<br>(0.014–0.039) |
| Stage IV chronic kidney disease untreated without anemia due to diabetes mellitus      | Chronic kidney disease (stage IV)                                                                    | tires easily, has nausea, reduced appetite and difficulty sleeping.                                                                                                                                                                       | 0.104<br>(0.07–0.147)  |
| Stage III chronic kidney disease and severe anemia due to diabetes mellitus            | Anemia, severe                                                                                       | feels very weak, tired and short of breath, and has problems with activities that require physical effort or deep concentration.                                                                                                          | 0.149<br>(0.101–0.209) |
| Stage III chronic kidney disease and mild anemia due to diabetes mellitus              | Anemia, mild                                                                                         | feels slightly tired and weak at times, but this does not interfere with normal daily activities.                                                                                                                                         | 0.004<br>(0.001–0.008) |
| Stage IV chronic kidney disease untreated and mild anemia due to diabetes mellitus     | Mild anemia with Stage IV CKD                                                                        | --                                                                                                                                                                                                                                        | --                     |
| Stage III chronic kidney disease without anemia due to diabetes mellitus               | Asymptomatic                                                                                         | --                                                                                                                                                                                                                                        | --                     |
| Stage IV chronic kidney disease untreated and moderate anemia due to diabetes mellitus | Moderate anemia with Stage IV CKD                                                                    | --                                                                                                                                                                                                                                        | --                     |
| Stage V chronic kidney disease untreated without anemia due to diabetes mellitus       | Terminal phase, without medication (for cancers, end-stage kidney/liver disease)                     | has lost a lot of weight and has constant pain. The person has no appetite, feels nauseous, and needs to spend most of the day in bed.                                                                                                    | 0.569<br>(0.389–0.727) |
| Stage IV chronic kidney disease untreated and severe anemia due to diabetes mellitus   | Severe anemia with Stage IV CKD                                                                      | --                                                                                                                                                                                                                                        | --                     |
| Stage V chronic kidney disease untreated and moderate anemia due to diabetes mellitus  | Moderate anemia and terminal phase, without medication (for cancers, end-stage kidney/liver disease) | (combined DW)                                                                                                                                                                                                                             | 0.591<br>(0.414–0.743) |
| End-stage renal disease on dialysis due to diabetes mellitus                           | End-stage renal disease, on dialysis                                                                 | is tired and has itching, cramps, headache, joint pains and shortness of breath. The person needs intensive medical care every other day lasting about half a day.                                                                        | 0.571<br>(0.398–0.725) |
| Stage V chronic kidney disease untreated and mild anemia due to diabetes mellitus      | Mild anemia and terminal phase, without medication (for cancers, end-stage kidney/liver disease)     | (combined DW)                                                                                                                                                                                                                             | 0.57<br>(0.391–0.727)  |
| Stage III chronic kidney disease and moderate anemia due to diabetes mellitus          | Anemia, moderate                                                                                     | feels moderate fatigue, weakness, and shortness of breath after exercise, making daily activities more difficult.                                                                                                                         | 0.052<br>(0.034–0.076) |
| Stage IV chronic kidney disease untreated and moderate anemia due to hypertension      | Moderate anemia with Stage IV CKD                                                                    | --                                                                                                                                                                                                                                        | --                     |
| Stage III chronic kidney disease without anemia due to hypertension                    | Asymptomatic                                                                                         | --                                                                                                                                                                                                                                        | --                     |
| Stage V chronic kidney disease untreated and moderate anemia due to hypertension       | Moderate anemia and terminal phase, without medication (for cancers, end-stage kidney/liver disease) | (combined DW)                                                                                                                                                                                                                             | 0.591<br>(0.414–0.743) |

| Appendix Table 6. GBD 2016 sequelae, health states, health state lay descriptions, and disability weights |                                                                                                      |                                                                                                                                                                    |                        |
|-----------------------------------------------------------------------------------------------------------|------------------------------------------------------------------------------------------------------|--------------------------------------------------------------------------------------------------------------------------------------------------------------------|------------------------|
| Sequela                                                                                                   | Health state name                                                                                    | Health state lay description                                                                                                                                       | Disability weight      |
| Stage V chronic kidney disease untreated and severe anemia due to hypertension                            | Severe anemia and terminal phase, without medication (for cancers, end-stage kidney/liver disease)   | (combined DW)                                                                                                                                                      | 0.631<br>(0.456–0.782) |
| End-stage renal disease on dialysis due to hypertension                                                   | End-stage renal disease, on dialysis                                                                 | is tired and has itching, cramps, headache, joint pains and shortness of breath. The person needs intensive medical care every other day lasting about half a day. | 0.571<br>(0.398–0.725) |
| Stage V chronic kidney disease untreated and mild anemia due to hypertension                              | Mild anemia and terminal phase, without medication (for cancers, end-stage kidney/liver disease)     | (combined DW)                                                                                                                                                      | 0.57<br>(0.391–0.727)  |
| Stage III chronic kidney disease and mild anemia due to hypertension                                      | Anemia, mild                                                                                         | feels slightly tired and weak at times, but this does not interfere with normal daily activities.                                                                  | 0.004<br>(0.001–0.008) |
| Stage IV chronic kidney disease untreated and severe anemia due to hypertension                           | Severe anemia with Stage IV CKD                                                                      | --                                                                                                                                                                 | --                     |
| Stage IV chronic kidney disease untreated without anemia due to hypertension                              | Chronic kidney disease (stage IV)                                                                    | tires easily, has nausea, reduced appetite and difficulty sleeping.                                                                                                | 0.104<br>(0.07–0.147)  |
| Stage V chronic kidney disease untreated without anemia due to hypertension                               | Terminal phase, without medication (for cancers, end-stage kidney/liver disease)                     | has lost a lot of weight and has constant pain. The person has no appetite, feels nauseous, and needs to spend most of the day in bed.                             | 0.569<br>(0.389–0.727) |
| Stage III chronic kidney disease and severe anemia due to hypertension                                    | Anemia, severe                                                                                       | feels very weak, tired and short of breath, and has problems with activities that require physical effort or deep concentration.                                   | 0.149<br>(0.101–0.209) |
| Stage IV chronic kidney disease untreated and mild anemia due to hypertension                             | Mild anemia with Stage IV CKD                                                                        | --                                                                                                                                                                 | --                     |
| End-stage renal disease after transplant due to hypertension                                              | End-stage renal disease, with kidney transplant                                                      | sometimes feels tired and down, and has some difficulty with daily activities.                                                                                     | 0.024<br>(0.014–0.039) |
| Stage III chronic kidney disease and moderate anemia due to hypertension                                  | Anemia, moderate                                                                                     | feels moderate fatigue, weakness, and shortness of breath after exercise, making daily activities more difficult.                                                  | 0.052<br>(0.034–0.076) |
| End-stage renal disease after transplant due to glomerulonephritis                                        | End-stage renal disease, with kidney transplant                                                      | sometimes feels tired and down, and has some difficulty with daily activities.                                                                                     | 0.024<br>(0.014–0.039) |
| Stage IV chronic kidney disease untreated without anemia due to glomerulonephritis                        | Chronic kidney disease (stage IV)                                                                    | tires easily, has nausea, reduced appetite and difficulty sleeping.                                                                                                | 0.104<br>(0.07–0.147)  |
| Stage V chronic kidney disease untreated and moderate anemia due to glomerulonephritis                    | Moderate anemia and terminal phase, without medication (for cancers, end-stage kidney/liver disease) | (combined DW)                                                                                                                                                      | 0.591<br>(0.414–0.743) |
| Stage III chronic kidney disease and moderate anemia due to glomerulonephritis                            | Anemia, moderate                                                                                     | feels moderate fatigue, weakness, and shortness of breath after exercise, making daily activities more difficult.                                                  | 0.052<br>(0.034–0.076) |
| Stage III chronic kidney disease and severe anemia due to glomerulonephritis                              | Anemia, severe                                                                                       | feels very weak, tired and short of breath, and has problems with activities that require physical effort or deep concentration.                                   | 0.149<br>(0.101–0.209) |
| Stage III chronic kidney disease and mild anemia due to glomerulonephritis                                | Anemia, mild                                                                                         | feels slightly tired and weak at times, but this does not interfere with normal daily activities.                                                                  | 0.004<br>(0.001–0.008) |
| Stage III chronic kidney disease without anemia due to glomerulonephritis                                 | Asymptomatic                                                                                         | --                                                                                                                                                                 | --                     |
| Stage V chronic kidney disease untreated and mild anemia due to glomerulonephritis                        | Mild anemia and terminal phase, without medication (for cancers, end-stage kidney/liver disease)     | (combined DW)                                                                                                                                                      | 0.57<br>(0.391–0.727)  |
| Stage IV chronic kidney disease untreated and severe anemia due to glomerulonephritis                     | Severe anemia with Stage IV CKD                                                                      | --                                                                                                                                                                 | --                     |
| Stage IV chronic kidney disease untreated and moderate anemia due to glomerulonephritis                   | Moderate anemia with Stage IV CKD                                                                    | --                                                                                                                                                                 | --                     |
| Stage V chronic kidney disease untreated and severe anemia due to glomerulonephritis                      | Severe anemia and terminal phase, without medication (for cancers, end-stage kidney/liver disease)   | (combined DW)                                                                                                                                                      | 0.631<br>(0.456–0.782) |
| Stage V chronic kidney disease untreated without anemia due to glomerulonephritis                         | Terminal phase, without medication (for cancers, end-stage kidney/liver disease)                     | has lost a lot of weight and has constant pain. The person has no appetite, feels nauseous, and needs to spend most of the day in bed.                             | 0.569<br>(0.389–0.727) |
| Stage IV chronic kidney disease untreated and mild anemia due to glomerulonephritis                       | Mild anemia with Stage IV CKD                                                                        | --                                                                                                                                                                 | --                     |
| End-stage renal disease on dialysis due to glomerulonephritis                                             | End-stage renal disease, on dialysis                                                                 | is tired and has itching, cramps, headache, joint pains and shortness of breath. The person needs intensive medical care every other day lasting about half a day. | 0.571<br>(0.398–0.725) |
| Stage V chronic kidney disease untreated without anemia due to other causes                               | Terminal phase, without medication (for cancers, end-stage kidney/liver disease)                     | has lost a lot of weight and has constant pain. The person has no appetite, feels nauseous, and needs to spend most of the day in bed.                             | 0.569<br>(0.389–0.727) |
| Stage III chronic kidney disease without anemia due to other causes                                       | Asymptomatic                                                                                         | --                                                                                                                                                                 | --                     |
| Stage IV chronic kidney disease untreated without anemia due to other causes                              | Chronic kidney disease (stage IV)                                                                    | tires easily, has nausea, reduced appetite and difficulty sleeping.                                                                                                | 0.104<br>(0.07–0.147)  |
| Stage III chronic kidney disease and mild anemia due to other causes                                      | Anemia, mild                                                                                         | feels slightly tired and weak at times, but this does not interfere with normal daily activities.                                                                  | 0.004<br>(0.001–0.008) |
| Stage IV chronic kidney disease untreated and mild anemia due to other causes                             | Mild anemia with Stage IV CKD                                                                        | --                                                                                                                                                                 | --                     |
| Stage III chronic kidney disease and moderate anemia due to other causes                                  | Anemia, moderate                                                                                     | feels moderate fatigue, weakness, and shortness of breath after exercise, making daily activities more difficult.                                                  | 0.052<br>(0.034–0.076) |
| Stage IV chronic kidney disease untreated and moderate anemia due to other causes                         | Moderate anemia with Stage IV CKD                                                                    | --                                                                                                                                                                 | --                     |
| Stage V chronic kidney disease untreated and moderate anemia due to other causes                          | Moderate anemia and terminal phase, without medication (for cancers, end-stage kidney/liver disease) | (combined DW)                                                                                                                                                      | 0.591<br>(0.414–0.743) |



| Appendix Table 6. GBD 2016 sequelae, health states, health state lay descriptions, and disability weights |                                                                                                    |                                                                                                                                                                    |                        |
|-----------------------------------------------------------------------------------------------------------|----------------------------------------------------------------------------------------------------|--------------------------------------------------------------------------------------------------------------------------------------------------------------------|------------------------|
| Sequela                                                                                                   | Health state name                                                                                  | Health state lay description                                                                                                                                       | Disability weight      |
| Stage III chronic kidney disease and severe anemia due to other causes                                    | Anemia, severe                                                                                     | feels very weak, tired and short of breath, and has problems with activities that require physical effort or deep concentration.                                   | 0.149<br>(0.101–0.209) |
| Stage IV chronic kidney disease untreated and severe anemia due to other causes                           | Severe anemia with Stage IV CKD                                                                    | --                                                                                                                                                                 | --                     |
| End-stage renal disease after transplant due to other causes                                              | End-stage renal disease, with kidney transplant                                                    | sometimes feels tired and down, and has some difficulty with daily activities.                                                                                     | 0.024<br>(0.014–0.039) |
| Stage V chronic kidney disease untreated and severe anemia due to other causes                            | Severe anemia and terminal phase, without medication (for cancers, end-stage kidney/liver disease) | (combined DW)                                                                                                                                                      | 0.631<br>(0.456–0.782) |
| Stage V chronic kidney disease untreated and mild anemia due to other causes                              | Mild anemia and terminal phase, without medication (for cancers, end-stage kidney/liver disease)   | (combined DW)                                                                                                                                                      | 0.57<br>(0.391–0.727)  |
| End-stage renal disease on dialysis due to other causes                                                   | End-stage renal disease, on dialysis                                                               | is tired and has itching, cramps, headache, joint pains and shortness of breath. The person needs intensive medical care every other day lasting about half a day. | 0.571<br>(0.398–0.725) |
| Mild interstitial nephritis and urinary tract infections                                                  | Infectious disease, acute episode, mild                                                            | has a low fever and mild discomfort, but no difficulty with daily activities.                                                                                      | 0.006<br>(0.002–0.012) |
| Moderate interstitial nephritis and urinary tract infections                                              | Infectious disease, acute episode, moderate                                                        | has a fever and aches, and feels weak, which causes some difficulty with daily activities.                                                                         | 0.051<br>(0.032–0.074) |
| Moderate urolithiasis episodes                                                                            | Abdominopelvic problem, moderate                                                                   | has pain in the belly and feels nauseous. The person has difficulties with daily activities.                                                                       | 0.114<br>(0.078–0.159) |
| Severe urolithiasis episodes                                                                              | Abdominopelvic problem, severe                                                                     | has severe pain in the belly and feels nauseous. The person is anxious and unable to carry out daily activities.                                                   | 0.324<br>(0.22–0.442)  |
| Mild urolithiasis episodes                                                                                | Abdominopelvic problem, mild                                                                       | has some pain in the belly that causes nausea but does not interfere with daily activities.                                                                        | 0.011<br>(0.005–0.021) |
| Symptomatic benign prostatic hyperplasia                                                                  | Benign prostatic hypertrophy, symptomatic cases                                                    | feels the urge to urinate frequently, but when passing urine it comes out slowly and sometimes is painful.                                                         | 0.067<br>(0.043–0.097) |
| Asymptomatic benign prostatic hyperplasia                                                                 | Asymptomatic                                                                                       | --                                                                                                                                                                 | --                     |
| Primary male infertility                                                                                  | Infertility, primary                                                                               | wants to have a child and has a fertile partner, but the couple cannot conceive.                                                                                   | 0.008<br>(0.003–0.015) |
| Secondary male infertility                                                                                | Infertility, secondary                                                                             | has at least one child, and wants to have more children. The person has a fertile partner, but the couple cannot conceive.                                         | 0.005<br>(0.002–0.011) |
| Other urinary diseases                                                                                    | Post-COMO calculation for residuals (YLL/YLD ratio, other methods)                                 | --                                                                                                                                                                 | --                     |
| Asymptomatic uterine fibroids                                                                             | Asymptomatic                                                                                       | --                                                                                                                                                                 | --                     |
| Mild abdominal pain due to uterine fibroids, with severe anemia                                           | Mild abdominal pain with severe anemia                                                             | (combined DW)                                                                                                                                                      | --                     |
| Mild abdominal pain due to uterine fibroids, with moderate anemia                                         | Mild abdominal pain with moderate anemia                                                           | (combined DW)                                                                                                                                                      | --                     |
| Mild abdominal pain due to uterine fibroids, without anemia                                               | Abdominopelvic problem, mild                                                                       | has some pain in the belly that causes nausea but does not interfere with daily activities.                                                                        | 0.011<br>(0.005–0.021) |
| Mild abdominal pain due to uterine fibroids, with mild anemia                                             | Mild abdominal pain with mild anemia                                                               | (combined DW)                                                                                                                                                      | --                     |
| Secondary infertility due to polycystic ovarian syndrome                                                  | Disfigurement level 1 and secondary infertility                                                    | (combined DW)                                                                                                                                                      | --                     |
| Hirsutism due to polycystic ovarian syndrome                                                              | Disfigurement, level 1                                                                             | has a slight, visible physical deformity that others notice, which causes some worry and discomfort.                                                               | 0.011<br>(0.005–0.021) |
| Hirsutism and secondary infertility due to polycystic ovarian syndrome                                    | Infertility, secondary                                                                             | has at least one child, and wants to have more children. The person has a fertile partner, but the couple cannot conceive.                                         | 0.005<br>(0.002–0.011) |
| Asymptomatic polycystic ovarian syndrome                                                                  | Asymptomatic                                                                                       | --                                                                                                                                                                 | --                     |
| Hirsutism and primary infertility due to polycystic ovarian syndrome                                      | Disfigurement level 1 and primary infertility                                                      | (combined DW)                                                                                                                                                      | --                     |
| Primary infertility due to polycystic ovarian syndrome                                                    | Infertility, primary                                                                               | wants to have a child and has a fertile partner, but the couple cannot conceive.                                                                                   | 0.008<br>(0.003–0.015) |
| Idiopathic secondary female infertility                                                                   | Infertility, secondary                                                                             | has at least one child, and wants to have more children. The person has a fertile partner, but the couple cannot conceive.                                         | 0.005<br>(0.002–0.011) |
| Idiopathic primary female infertility                                                                     | Infertility, primary                                                                               | wants to have a child and has a fertile partner, but the couple cannot conceive.                                                                                   | 0.008<br>(0.003–0.015) |
| Mild abdominal pain and secondary infertility due to endometriosis                                        | Mild abdominal pain and secondary infertility                                                      | (combined DW)                                                                                                                                                      | --                     |
| Moderate abdominal pain and secondary infertility due to endometriosis                                    | Moderate abdominal pain and secondary infertility                                                  | (combined DW)                                                                                                                                                      | --                     |
| Severe abdominal pain and secondary infertility due to endometriosis                                      | Severe abdominal pain and secondary infertility                                                    | (combined DW)                                                                                                                                                      | --                     |
| Severe endometriosis                                                                                      | Abdominopelvic problem, severe                                                                     | has severe pain in the belly and feels nauseous. The person is anxious and unable to carry out daily activities.                                                   | 0.324<br>(0.22–0.442)  |
| Primary infertility due to endometriosis                                                                  | Infertility, primary                                                                               | wants to have a child and has a fertile partner, but the couple cannot conceive.                                                                                   | 0.008<br>(0.003–0.015) |
| Secondary infertility due to endometriosis                                                                | Infertility, secondary                                                                             | has at least one child, and wants to have more children. The person has a fertile partner, but the couple cannot conceive.                                         | 0.005<br>(0.002–0.011) |
| Moderate abdominal pain due to endometriosis                                                              | Abdominopelvic problem, moderate                                                                   | has pain in the belly and feels nauseous. The person has difficulties with daily activities.                                                                       | 0.114<br>(0.078–0.159) |
| Asymptomatic endometriosis                                                                                | Asymptomatic                                                                                       | --                                                                                                                                                                 | --                     |
| Severe abdominal pain and primary infertility due to endometriosis                                        | Severe abdominal pain and primary infertility                                                      | (combined DW)                                                                                                                                                      | --                     |
| Mild abdominal pain due to endometriosis                                                                  | Abdominopelvic problem, mild                                                                       | has some pain in the belly that causes nausea but does not interfere with daily activities.                                                                        | 0.011<br>(0.005–0.021) |
| Moderate abdominal pain and primary infertility due to endometriosis                                      | Moderate abdominal pain and primary infertility                                                    | (combined DW)                                                                                                                                                      | --                     |
| Mild abdominal pain and primary infertility due to endometriosis                                          | Mild abdominal pain and primary infertility                                                        | (combined DW)                                                                                                                                                      | --                     |
| Abdominal pain due to genital prolapse                                                                    | Abdominopelvic problem, mild                                                                       | has some pain in the belly that causes nausea but does not interfere with daily activities.                                                                        | 0.011<br>(0.005–0.021) |

**Appendix Table 6. GBD 2016 sequelae, health states, health state lay descriptions, and disability weights**

| Sequela                                                            | Health state name                                                                                | Health state lay description                                                                                                                                                                                              | Disability weight      |
|--------------------------------------------------------------------|--------------------------------------------------------------------------------------------------|---------------------------------------------------------------------------------------------------------------------------------------------------------------------------------------------------------------------------|------------------------|
| Asymptomatic genital prolapse                                      | Asymptomatic                                                                                     | --                                                                                                                                                                                                                        | --                     |
| Abdominal pain and stress incontinence due to genital prolapse     | Mild abdominal pain and stress incontinence                                                      | (combined DW)                                                                                                                                                                                                             | --                     |
| Stress incontinence due to genital prolapse                        | Stress incontinence                                                                              | loses small amounts of urine without meaning to when coughing, sneezing, laughing or during physical exercise.                                                                                                            | 0.02<br>(0.011–0.035)  |
| Abdominal pain due to premenstrual syndrome                        | Abdominopelvic problem, mild                                                                     | has some pain in the belly that causes nausea but does not interfere with daily activities.                                                                                                                               | 0.011<br>(0.005–0.021) |
| Asymptomatic premenstrual syndrome                                 | Asymptomatic                                                                                     | --                                                                                                                                                                                                                        | --                     |
| Depression due to premenstrual syndrome                            | Major depressive disorder, mild episode                                                          | feels persistent sadness and has lost interest in usual activities. The person sometimes sleeps badly, feels tired, or has trouble concentrating but still manages to function in daily life with extra effort.           | 0.145<br>(0.099–0.209) |
| Abdominal pain and depression due to premenstrual syndrome         | Mild abdominal pain and mild depression                                                          | (combined DW)                                                                                                                                                                                                             | --                     |
| Severe other gynecological disorders                               | Abdominopelvic problem, severe                                                                   | has severe pain in the belly and feels nauseous. The person is anxious and unable to carry out daily activities.                                                                                                          | 0.324<br>(0.22–0.442)  |
| Mild other gynecological disorders                                 | Abdominopelvic problem, mild                                                                     | has some pain in the belly that causes nausea but does not interfere with daily activities.                                                                                                                               | 0.011<br>(0.005–0.021) |
| Moderate anemia due to other gynecological diseases                | Anemia, moderate                                                                                 | feels moderate fatigue, weakness, and shortness of breath after exercise, making daily activities more difficult.                                                                                                         | 0.052<br>(0.034–0.076) |
| Moderate other gynecological disorders                             | Abdominopelvic problem, moderate                                                                 | has pain in the belly and feels nauseous. The person has difficulties with daily activities.                                                                                                                              | 0.114<br>(0.078–0.159) |
| Severe anemia due to other gynecological diseases                  | Anemia, severe                                                                                   | feels very weak, tired and short of breath, and has problems with activities that require physical effort or deep concentration.                                                                                          | 0.149<br>(0.101–0.209) |
| Asymptomatic other gynecological disorders                         | Asymptomatic                                                                                     | --                                                                                                                                                                                                                        | --                     |
| Mild anemia due to other gynecological diseases                    | Anemia, mild                                                                                     | feels slightly tired and weak at times, but this does not interfere with normal daily activities.                                                                                                                         | 0.004<br>(0.001–0.008) |
| Beta-thalassemia major, with moderate anemia                       | Anemia, moderate; Generic uncomplicated disease anxiety                                          | --                                                                                                                                                                                                                        | --                     |
| Asymptomatic and mild heart failure due to thalassemias            | Heart failure, mild                                                                              | is short of breath and easily tires with moderate physical activity, such as walking uphill or more than a quarter-mile on level ground. The person feels comfortable at rest or during activities requiring less effort. | 0.041<br>(0.026–0.062) |
| Moderate heart failure due to thalassemias                         | Heart failure, moderate                                                                          | is short of breath and easily tires with minimal physical activity, such as walking only a short distance. The person feels comfortable at rest but avoids moderate activity.                                             | 0.072<br>(0.047–0.103) |
| Hemoglobin E/beta-thalassemia, with moderate anemia                | Anemia, moderate; Generic uncomplicated disease anxiety                                          | --                                                                                                                                                                                                                        | --                     |
| Hemoglobin H disease, with moderate anemia                         | Anemia, moderate; Generic uncomplicated disease anxiety                                          | --                                                                                                                                                                                                                        | --                     |
| Hemoglobin H disease, severe infection with severe anemia          | Infectious disease, acute episode, severe; Generic uncomplicated disease anxiety; Anemia, severe | --                                                                                                                                                                                                                        | --                     |
| Beta-thalassemia major, with severe anemia                         | Anemia, severe; Generic uncomplicated disease anxiety                                            | --                                                                                                                                                                                                                        | --                     |
| Hemoglobin E/beta-thalassemia, with severe anemia                  | Anemia, severe; Generic uncomplicated disease anxiety                                            | --                                                                                                                                                                                                                        | --                     |
| Beta-thalassemia major, severe infection with severe anemia        | Infectious disease, acute episode, severe; Generic uncomplicated disease anxiety; Anemia, severe | --                                                                                                                                                                                                                        | --                     |
| Hemoglobin H disease, with mild anemia                             | Anemia, mild; Generic uncomplicated disease anxiety                                              | --                                                                                                                                                                                                                        | --                     |
| Hemoglobin E/beta-thalassemia, severe infection with severe anemia | Infectious disease, acute episode, severe; Generic uncomplicated disease anxiety; Anemia, severe | --                                                                                                                                                                                                                        | --                     |
| Hemoglobin E/Beta-thalassemia, without anemia                      | Generic uncomplicated disease: anxiety about diagnosis                                           | has a disease diagnosis that causes some worry but minimal interference with daily activities.                                                                                                                            | 0.012<br>(0.006–0.023) |
| Hemoglobin E/beta-thalassemia, with mild anemia                    | Anemia, mild; Generic uncomplicated disease anxiety                                              | --                                                                                                                                                                                                                        | --                     |
| Beta-thalassemia major, with mild anemia                           | Anemia, mild; Generic uncomplicated disease anxiety                                              | --                                                                                                                                                                                                                        | --                     |
| Beta-thalassemia major, without anemia                             | Generic uncomplicated disease: anxiety about diagnosis                                           | has a disease diagnosis that causes some worry but minimal interference with daily activities.                                                                                                                            | 0.012<br>(0.006–0.023) |
| Hemoglobin H disease, without anemia                               | Generic uncomplicated disease: anxiety about diagnosis                                           | has a disease diagnosis that causes some worry but minimal interference with daily activities.                                                                                                                            | 0.012<br>(0.006–0.023) |
| Severe heart failure due to thalassemias                           | Heart failure, severe                                                                            | is short of breath and feels tired when at rest. The person avoids any physical activity, for fear of worsening the breathing problems.                                                                                   | 0.179<br>(0.122–0.251) |
| Hemoglobin H disease, with severe anemia                           | Anemia, severe; Generic uncomplicated disease anxiety                                            | --                                                                                                                                                                                                                        | --                     |
| Moderate anemia due to B-thalassemia trait                         | Anemia, moderate                                                                                 | feels moderate fatigue, weakness, and shortness of breath after exercise, making daily activities more difficult.                                                                                                         | 0.052<br>(0.034–0.076) |
| Asymptomatic B-thalassemia trait                                   | Asymptomatic                                                                                     | --                                                                                                                                                                                                                        | --                     |
| Asymptomatic hemoglobin E trait                                    | Asymptomatic                                                                                     | --                                                                                                                                                                                                                        | --                     |
| Moderate anemia due to hemoglobin E trait                          | Anemia, moderate                                                                                 | feels moderate fatigue, weakness, and shortness of breath after exercise, making daily activities more difficult.                                                                                                         | 0.052<br>(0.034–0.076) |
| Mild anemia due to B-thalassemia trait                             | Anemia, mild                                                                                     | feels slightly tired and weak at times, but this does not interfere with normal daily activities.                                                                                                                         | 0.004<br>(0.001–0.008) |
| Mild anemia due to hemoglobin E trait                              | Anemia, mild                                                                                     | feels slightly tired and weak at times, but this does not interfere with normal daily activities.                                                                                                                         | 0.004<br>(0.001–0.008) |

**Appendix Table 6. GBD 2016 sequelae, health states, health state lay descriptions, and disability weights**

| Sequela                                                                                                               | Health state name                                                                                                          | Health state lay description                                                                                                     | Disability weight      |
|-----------------------------------------------------------------------------------------------------------------------|----------------------------------------------------------------------------------------------------------------------------|----------------------------------------------------------------------------------------------------------------------------------|------------------------|
| Severe anemia due to hemoglobin E trait                                                                               | Anemia, severe                                                                                                             | feels very weak, tired and short of breath, and has problems with activities that require physical effort or deep concentration. | 0.149<br>(0.101–0.209) |
| Severe anemia due to B-thalassemia trait                                                                              | Anemia, severe                                                                                                             | feels very weak, tired and short of breath, and has problems with activities that require physical effort or deep concentration. | 0.149<br>(0.101–0.209) |
| Homozygous sickle cell and severe sickle cell/beta-thalassemia, without anemia                                        | Generic uncomplicated disease: anxiety about diagnosis                                                                     | has a disease diagnosis that causes some worry but minimal interference with daily activities.                                   | 0.012<br>(0.006–0.023) |
| Hemoglobin SC disease, without anemia                                                                                 | Generic uncomplicated disease: anxiety about diagnosis                                                                     | has a disease diagnosis that causes some worry but minimal interference with daily activities.                                   | 0.012<br>(0.006–0.023) |
| Mild sickle cell/beta-thalassemia, without anemia                                                                     | Generic uncomplicated disease: anxiety about diagnosis                                                                     | has a disease diagnosis that causes some worry but minimal interference with daily activities.                                   | 0.012<br>(0.006–0.023) |
| Hemoglobin SC disease, with vaso-occlusive crisis, stroke, and severe anemia                                          | Generic uncomplicated disease anxiety; long-term consequences due to stroke; severe abdominopelvic problem; Anemia, severe | --                                                                                                                               | --                     |
| Mild sickle cell/beta-thalassemia, with vaso-occlusive crisis, stroke, and severe anemia                              | Generic uncomplicated disease anxiety; long-term consequences due to stroke; severe abdominopelvic problem; Anemia, severe | --                                                                                                                               | --                     |
| Mild sickle cell/beta-thalassemia, with stroke, without anemia                                                        | Generic uncomplicated disease anxiety; long-term consequences due to stroke                                                | --                                                                                                                               | --                     |
| Homozygous sickle cell and severe sickle cell/beta-thalassemia, with vaso-occlusive crisis and stroke, without anemia | Generic uncomplicated disease anxiety; long-term consequences due to stroke; severe abdominopelvic problem                 | --                                                                                                                               | --                     |
| Hemoglobin SC disease, with vaso-occlusive crisis and stroke, without anemia                                          | Generic uncomplicated disease anxiety; long-term consequences due to stroke; severe abdominopelvic problem                 | --                                                                                                                               | --                     |
| Mild sickle cell/beta-thalassemia, with vaso-occlusive crisis and stroke, without anemia                              | Generic uncomplicated disease anxiety; long-term consequences due to stroke; severe abdominopelvic problem                 | --                                                                                                                               | --                     |
| Homozygous sickle cell and severe sickle cell/beta-thalassemia, with vaso-occlusive crisis and severe anemia          | Moderate abdominal pain; Anemia, severe; Generic uncomplicated disease anxiety                                             | --                                                                                                                               | --                     |
| Homozygous sickle cell and severe sickle cell/beta-thalassemia, with mild anemia                                      | Anemia, mild; Generic uncomplicated disease anxiety                                                                        | --                                                                                                                               | --                     |
| Hemoglobin SC disease, with stroke, without anemia                                                                    | Generic uncomplicated disease anxiety; long-term consequences due to stroke                                                | --                                                                                                                               | --                     |
| Homozygous sickle cell and severe sickle cell/beta-thalassemia, with stroke, without anemia                           | Generic uncomplicated disease anxiety; long-term consequences due to stroke                                                | --                                                                                                                               | --                     |
| Mild sickle cell/beta-thalassemia, with vaso-occlusive crisis, without anemia                                         | Generic uncomplicated disease anxiety and severe abdominopelvic problem                                                    | --                                                                                                                               | --                     |
| Hemoglobin SC disease, with vaso-occlusive crisis, without anemia                                                     | Generic uncomplicated disease anxiety and severe abdominopelvic problem                                                    | --                                                                                                                               | --                     |
| Hemoglobin SC disease, with vaso-occlusive crisis and severe anemia                                                   | Moderate abdominal pain; Anemia, severe; Generic uncomplicated disease anxiety                                             | --                                                                                                                               | --                     |
| Homozygous sickle cell and severe sickle cell/beta-thalassemia, with severe anemia                                    | Anemia, severe; Generic uncomplicated disease anxiety                                                                      | --                                                                                                                               | --                     |
| Hemoglobin SC disease, with severe anemia                                                                             | Anemia, severe; Generic uncomplicated disease anxiety                                                                      | --                                                                                                                               | --                     |
| Homozygous sickle cell and severe sickle cell/beta-thalassemia, with stroke and severe anemia                         | Generic uncomplicated disease anxiety; Long-term consequences due to stroke; Anemia, severe                                | --                                                                                                                               | --                     |
| Hemoglobin SC disease, with stroke and severe anemia                                                                  | Generic uncomplicated disease anxiety; Long-term consequences due to stroke; Anemia, severe                                | --                                                                                                                               | --                     |
| Hemoglobin SC disease, with mild anemia                                                                               | Anemia, mild; Generic uncomplicated disease anxiety                                                                        | --                                                                                                                               | --                     |
| Mild sickle cell/beta-thalassemia, with vaso-occlusive crisis and severe anemia                                       | Moderate abdominal pain; Anemia, severe; Generic uncomplicated disease anxiety                                             | --                                                                                                                               | --                     |
| Mild sickle cell/beta-thalassemia, with mild anemia                                                                   | Anemia, mild; Generic uncomplicated disease anxiety                                                                        | --                                                                                                                               | --                     |
| Mild sickle cell/beta-thalassemia, with severe anemia                                                                 | Anemia, severe; Generic uncomplicated disease anxiety                                                                      | --                                                                                                                               | --                     |
| Mild sickle cell/beta-thalassemia, with moderate anemia                                                               | Anemia, moderate; Generic uncomplicated disease anxiety                                                                    | --                                                                                                                               | --                     |
| Homozygous sickle cell and severe sickle cell/beta-thalassemia, with vaso-occlusive crisis, stroke, and severe anemia | Generic uncomplicated disease anxiety; long-term consequences due to stroke; severe abdominopelvic problem; Anemia, severe | --                                                                                                                               | --                     |
| Hemoglobin SC disease, with moderate anemia                                                                           | Anemia, moderate; Generic uncomplicated disease anxiety                                                                    | --                                                                                                                               | --                     |
| Homozygous sickle cell and severe sickle cell/beta-thalassemia, with moderate anemia                                  | Anemia, moderate; Generic uncomplicated disease anxiety                                                                    | --                                                                                                                               | --                     |
| Homozygous sickle cell and severe sickle cell/beta-thalassemia, with vaso-occlusive crisis, without anemia            | Generic uncomplicated disease anxiety and severe abdominopelvic problem                                                    | --                                                                                                                               | --                     |
| Mild sickle cell/beta-thalassemia, with stroke and severe anemia                                                      | Generic uncomplicated disease anxiety; Long-term consequences due to stroke; Anemia, severe                                | --                                                                                                                               | --                     |
| Asymptomatic sickle cell trait                                                                                        | Asymptomatic                                                                                                               | --                                                                                                                               | --                     |
| Moderate anemia due to sickle cell trait                                                                              | Anemia, moderate                                                                                                           | feels moderate fatigue, weakness, and shortness of breath after exercise, making daily activities more difficult.                | 0.052<br>(0.034–0.076) |
| Mild anemia due to sickle cell trait                                                                                  | Anemia, mild                                                                                                               | feels slightly tired and weak at times, but this does not interfere with normal daily activities.                                | 0.004<br>(0.001–0.008) |
| Severe anemia due to sickle cell trait                                                                                | Anemia, severe                                                                                                             | feels very weak, tired and short of breath, and has problems with activities that require physical effort or deep concentration. | 0.149<br>(0.101–0.209) |



**Appendix Table 6. GBD 2016 sequelae, health states, health state lay descriptions, and disability weights**

| Sequela                                                                                      | Health state name                                                  | Health state lay description                                                                                                                                                                                                         | Disability weight      |
|----------------------------------------------------------------------------------------------|--------------------------------------------------------------------|--------------------------------------------------------------------------------------------------------------------------------------------------------------------------------------------------------------------------------------|------------------------|
| Asymptomatic and mild heart failure due to G6PD deficiency                                   | Heart failure, mild                                                | is short of breath and easily tires with moderate physical activity, such as walking uphill or more than a quarter-mile on level ground. The person feels comfortable at rest or during activities requiring less effort.            | 0.041<br>(0.026–0.062) |
| Mild anemia due to G6PD deficiency                                                           | Anemia, mild                                                       | feels slightly tired and weak at times, but this does not interfere with normal daily activities.                                                                                                                                    | 0.004<br>(0.001–0.008) |
| Severe heart failure due to G6PD deficiency                                                  | Heart failure, severe                                              | is short of breath and feels tired when at rest. The person avoids any physical activity, for fear of worsening the breathing problems.                                                                                              | 0.179<br>(0.122–0.251) |
| Severe anemia due to G6PD deficiency                                                         | Anemia, severe                                                     | feels very weak, tired and short of breath, and has problems with activities that require physical effort or deep concentration.                                                                                                     | 0.149<br>(0.101–0.209) |
| Asymptomatic G6PD deficiency                                                                 | Asymptomatic                                                       | --                                                                                                                                                                                                                                   | --                     |
| Moderate heart failure due to G6PD deficiency                                                | Heart failure, moderate                                            | is short of breath and easily tires with minimal physical activity, such as walking only a short distance. The person feels comfortable at rest but avoids moderate activity.                                                        | 0.072<br>(0.047–0.103) |
| Moderate anemia due to G6PD deficiency                                                       | Anemia, moderate                                                   | feels moderate fatigue, weakness, and shortness of breath after exercise, making daily activities more difficult.                                                                                                                    | 0.052<br>(0.034–0.076) |
| Mild anemia due to hemizygous G6PD deficiency                                                | Anemia, mild                                                       | feels slightly tired and weak at times, but this does not interfere with normal daily activities.                                                                                                                                    | 0.004<br>(0.001–0.008) |
| Severe anemia due to hemizygous G6PD deficiency                                              | Anemia, severe                                                     | feels very weak, tired and short of breath, and has problems with activities that require physical effort or deep concentration.                                                                                                     | 0.149<br>(0.101–0.209) |
| Moderate anemia due to hemizygous G6PD deficiency                                            | Anemia, moderate                                                   | feels moderate fatigue, weakness, and shortness of breath after exercise, making daily activities more difficult.                                                                                                                    | 0.052<br>(0.034–0.076) |
| Asymptomatic hemizygous G6PD deficiency                                                      | Asymptomatic                                                       | --                                                                                                                                                                                                                                   | --                     |
| Mild anemia due to other hemoglobinopathies and hemolytic anemias                            | Anemia, mild                                                       | feels slightly tired and weak at times, but this does not interfere with normal daily activities.                                                                                                                                    | 0.004<br>(0.001–0.008) |
| Other hemoglobinopathies and hemolytic anemias                                               | Post-COMO calculation for residuals (YLL/YLD ratio, other methods) | --                                                                                                                                                                                                                                   | --                     |
| Severe heart failure due to other hemoglobinopathies and hemolytic anemias                   | Heart failure, severe                                              | is short of breath and feels tired when at rest. The person avoids any physical activity, for fear of worsening the breathing problems.                                                                                              | 0.179<br>(0.122–0.251) |
| Asymptomatic and mild heart failure due to other hemoglobinopathies and hemolytic anemias    | Heart failure, mild                                                | is short of breath and easily tires with moderate physical activity, such as walking uphill or more than a quarter-mile on level ground. The person feels comfortable at rest or during activities requiring less effort.            | 0.041<br>(0.026–0.062) |
| Moderate heart failure due to other hemoglobinopathies and hemolytic anemias                 | Heart failure, moderate                                            | is short of breath and easily tires with minimal physical activity, such as walking only a short distance. The person feels comfortable at rest but avoids moderate activity.                                                        | 0.072<br>(0.047–0.103) |
| Moderate anemia due to other hemoglobinopathies and hemolytic anemias                        | Anemia, moderate                                                   | feels moderate fatigue, weakness, and shortness of breath after exercise, making daily activities more difficult.                                                                                                                    | 0.052<br>(0.034–0.076) |
| Severe anemia due to other hemoglobinopathies and hemolytic anemias                          | Anemia, severe                                                     | feels very weak, tired and short of breath, and has problems with activities that require physical effort or deep concentration.                                                                                                     | 0.149<br>(0.101–0.209) |
| Severe anemia due to endocrine, metabolic, blood, and immune disorders                       | Anemia, severe                                                     | feels very weak, tired and short of breath, and has problems with activities that require physical effort or deep concentration.                                                                                                     | 0.149<br>(0.101–0.209) |
| Asymptomatic endocrine, metabolic, blood, and immune disorders                               | Asymptomatic                                                       | --                                                                                                                                                                                                                                   | --                     |
| Severe endocrine, metabolic, blood, and immune disorders                                     | Thrombocytopenic purpura                                           | easily bruises and sometimes bleeds from the gums and nose; feels weak and has some difficulty with daily activities.                                                                                                                | 0.159<br>(0.106–0.226) |
| Moderate heart failure due to endocrine, metabolic, blood, and immune disorders              | Heart failure, moderate                                            | is short of breath and easily tires with minimal physical activity, such as walking only a short distance. The person feels comfortable at rest but avoids moderate activity.                                                        | 0.072<br>(0.047–0.103) |
| Asymptomatic and mild heart failure due to endocrine, metabolic, blood, and immune disorders | Heart failure, mild                                                | is short of breath and easily tires with moderate physical activity, such as walking uphill or more than a quarter-mile on level ground. The person feels comfortable at rest or during activities requiring less effort.            | 0.041<br>(0.026–0.062) |
| Mild anemia due to endocrine, metabolic, blood, and immune disorders                         | Anemia, mild                                                       | feels slightly tired and weak at times, but this does not interfere with normal daily activities.                                                                                                                                    | 0.004<br>(0.001–0.008) |
| Mild endocrine, metabolic, blood, and immune disorders                                       | Hypothyroidism                                                     | has low energy and feels cold.                                                                                                                                                                                                       | 0.019<br>(0.01–0.032)  |
| Moderate anemia due to endocrine, metabolic, blood, and immune disorders                     | Anemia, moderate                                                   | feels moderate fatigue, weakness, and shortness of breath after exercise, making daily activities more difficult.                                                                                                                    | 0.052<br>(0.034–0.076) |
| Severe heart failure due to endocrine, metabolic, blood, and immune disorders                | Heart failure, severe                                              | is short of breath and feels tired when at rest. The person avoids any physical activity, for fear of worsening the breathing problems.                                                                                              | 0.179<br>(0.122–0.251) |
| Moderate endocrine, metabolic, blood, and immune disorders                                   | Hyperthyroidism                                                    | feels nervous, has palpitations, sweats a lot and has difficulty sleeping.                                                                                                                                                           | 0.145<br>(0.096–0.202) |
| Moderate rheumatoid arthritis                                                                | Musculoskeletal problems, generalized, moderate                    | has pain and deformity in most joints, causing difficulty moving around, getting up and down, and using the hands for lifting and carrying. The person often feels fatigue.                                                          | 0.317<br>(0.216–0.44)  |
| Mild rheumatoid arthritis                                                                    | Musculoskeletal problems, upper limbs, moderate                    | has moderate pain and stiffness in the arms and hands, which causes difficulty lifting, carrying, and holding things, and trouble sleeping because of the pain.                                                                      | 0.117<br>(0.08–0.163)  |
| Severe rheumatoid arthritis                                                                  | Musculoskeletal problems, generalized, severe                      | has severe, constant pain and deformity in most joints, causing difficulty moving around, getting up and down, eating, dressing, lifting, carrying and using the hands. The person often feels sadness, anxiety and extreme fatigue. | 0.581<br>(0.403–0.739) |

**Appendix Table 6. GBD 2016 sequelae, health states, health state lay descriptions, and disability weights**

| Sequela                                                                                         | Health state name                                                              | Health state lay description                                                                                                                                                                                                         | Disability weight      |
|-------------------------------------------------------------------------------------------------|--------------------------------------------------------------------------------|--------------------------------------------------------------------------------------------------------------------------------------------------------------------------------------------------------------------------------------|------------------------|
| Moderate osteoarthritis of the knee                                                             | Musculoskeletal problems, lower limbs, moderate                                | has moderate pain in the leg, which makes the person limp, and causes some difficulty walking, standing, lifting and carrying heavy things, getting up and down and sleeping.                                                        | 0.079<br>(0.054–0.11)  |
| Severe osteoarthritis of the hip                                                                | Musculoskeletal problems, lower limbs, severe                                  | has severe pain in the leg, which makes the person limp and causes a lot of difficulty walking, standing, lifting and carrying heavy things, getting up and down, and sleeping.                                                      | 0.165<br>(0.112–0.232) |
| Severe osteoarthritis of the knee                                                               | Musculoskeletal problems, lower limbs, severe                                  | has severe pain in the leg, which makes the person limp and causes a lot of difficulty walking, standing, lifting and carrying heavy things, getting up and down, and sleeping.                                                      | 0.165<br>(0.112–0.232) |
| Mild osteoarthritis of the knee                                                                 | Musculoskeletal problems, lower limbs, mild                                    | has pain in the leg, which causes some difficulty running, walking long distances, and getting up and down.                                                                                                                          | 0.023<br>(0.013–0.037) |
| Moderate osteoarthritis of the hip                                                              | Musculoskeletal problems, lower limbs, moderate                                | has moderate pain in the leg, which makes the person limp, and causes some difficulty walking, standing, lifting and carrying heavy things, getting up and down and sleeping.                                                        | 0.079<br>(0.054–0.11)  |
| Mild osteoarthritis of the hip                                                                  | Musculoskeletal problems, lower limbs, mild                                    | has pain in the leg, which causes some difficulty running, walking long distances, and getting up and down.                                                                                                                          | 0.023<br>(0.013–0.037) |
| Mild low back pain without leg pain                                                             | Low back pain, mild                                                            | has mild back pain, which causes some difficulty dressing, standing, and lifting things.                                                                                                                                             | 0.02<br>(0.011–0.035)  |
| Moderate low back pain without leg pain                                                         | Low back pain, moderate                                                        | has moderate back pain, which causes difficulty dressing, sitting, standing, walking, and lifting things.                                                                                                                            | 0.054<br>(0.035–0.079) |
| Most severe low back pain with leg pain                                                         | Back pain, most severe, with leg pain                                          | has constant back and leg pain, which causes difficulty dressing, sitting, standing, walking, and lifting things. The person sleeps poorly, is worried, and has lost some enjoyment in life.                                         | 0.384<br>(0.256–0.518) |
| Most severe low back pain without leg pain                                                      | Back pain, most severe, without leg pain                                       | has constant back pain, which causes difficulty dressing, sitting, standing, walking, and lifting things. The person sleeps poorly, is worried, and has lost some enjoyment in life.                                                 | 0.372<br>(0.25–0.506)  |
| Severe low back pain with leg pain                                                              | Back pain, severe, with leg pain                                               | has severe back and leg pain, which causes difficulty dressing, sitting, standing, walking, and lifting things. The person sleeps poorly and feels worried.                                                                          | 0.325<br>(0.219–0.446) |
| Severe low back pain without leg pain                                                           | Back pain, severe, without leg pain                                            | has severe back pain, which causes difficulty dressing, sitting, standing, walking, and lifting things. The person sleeps poorly and feels worried.                                                                                  | 0.272<br>(0.182–0.373) |
| Mild low back pain with leg pain                                                                | Mild low back pain with leg pain                                               | (combined DW)                                                                                                                                                                                                                        | 0.02<br>(0.011–0.035)  |
| Moderate low back pain with leg pain                                                            | Moderate low back pain with leg pain                                           | (combined DW)                                                                                                                                                                                                                        | 0.054<br>(0.035–0.079) |
| Severe neck pain                                                                                | Neck pain, severe                                                              | has severe neck pain, and difficulty turning the head and lifting things. The person gets headaches and arm pain, sleeps poorly, and feels tired and worried.                                                                        | 0.229<br>(0.153–0.317) |
| Most severe neck pain                                                                           | Neck pain, most severe                                                         | has constant neck pain and arm pain, and difficulty turning the head, holding arms up, and lifting things. The person gets headaches, sleeps poorly, and feels tired and worried.                                                    | 0.304<br>(0.202–0.415) |
| Moderate neck pain                                                                              | Neck pain, moderate                                                            | has constant neck pain, and has difficulty turning the head, holding arms up, and lifting things                                                                                                                                     | 0.114<br>(0.075–0.162) |
| Mild neck pain                                                                                  | Neck pain, mild                                                                | has neck pain, and has difficulty turning the head and lifting things.                                                                                                                                                               | 0.053<br>(0.034–0.078) |
| Asymptomatic gout                                                                               | Asymptomatic                                                                   | --                                                                                                                                                                                                                                   | --                     |
| Polyarticular gout                                                                              | Musculoskeletal problems, generalized, severe                                  | has severe, constant pain and deformity in most joints, causing difficulty moving around, getting up and down, eating, dressing, lifting, carrying and using the hands. The person often feels sadness, anxiety and extreme fatigue. | 0.581<br>(0.403–0.739) |
| Symptomatic episodes of gout                                                                    | Gout, acute                                                                    | has severe pain and swelling in the leg, making it very difficult to get up and down, stand, walk, lift, and carry heavy things. The person has trouble sleeping because of the                                                      | 0.295<br>(0.196–0.409) |
| Other musculoskeletal disorders severity level 5                                                | Musculoskeletal problems, generalized, moderate                                | has pain and deformity in most joints, causing difficulty moving around, getting up and down, and using the hands for lifting and carrying. The person often feels fatigue.                                                          | 0.317<br>(0.216–0.44)  |
| Other musculoskeletal disorders severity level 4                                                | Musculoskeletal problems, lower limbs, severe                                  | has severe pain in the leg, which makes the person limp and causes a lot of difficulty walking, standing, lifting and carrying heavy things, getting up and down, and sleeping.                                                      | 0.165<br>(0.112–0.232) |
| Other musculoskeletal disorders severity level 6                                                | Musculoskeletal problems, generalized, severe                                  | has severe, constant pain and deformity in most joints, causing difficulty moving around, getting up and down, eating, dressing, lifting, carrying and using the hands. The person often feels sadness, anxiety and extreme fatigue. | 0.581<br>(0.403–0.739) |
| Asymptomatic other musculoskeletal disorders                                                    | Asymptomatic                                                                   | --                                                                                                                                                                                                                                   | --                     |
| Other musculoskeletal disorders severity level 3                                                | Musculoskeletal problems, upper limbs, moderate                                | has moderate pain and stiffness in the arms and hands, which causes difficulty lifting, carrying, and holding things, and trouble sleeping because of the pain.                                                                      | 0.117<br>(0.08–0.163)  |
| Other musculoskeletal disorders severity level 2                                                | Musculoskeletal problems, upper limbs, mild                                    | has mild pain and stiffness in the arms and hands. The person has some difficulty lifting, carrying and holding things.                                                                                                              | 0.028<br>(0.017–0.045) |
| Other musculoskeletal disorders severity level 1                                                | Musculoskeletal problems, lower limbs, mild                                    | has pain in the leg, which causes some difficulty running, walking long distances, and getting up and down.                                                                                                                          | 0.023<br>(0.013–0.037) |
| Severe motor impairment, severe intellectual disability and incontinence due to spina bifida    | Severe motor impairment with severe intellectual disability and incontinence   | (combined DW)                                                                                                                                                                                                                        | 0.564<br>(0.418–0.71)  |
| Severe motor impairment, moderate intellectual disability and incontinence due to spina bifida  | Severe motor impairment with moderate intellectual disability and incontinence | (combined DW)                                                                                                                                                                                                                        | 0.534<br>(0.391–0.675) |
| Severe motor impairment, moderate intellectual disability and incontinence due to encephalocele | Severe motor impairment with moderate intellectual disability and incontinence | (combined DW)                                                                                                                                                                                                                        | 0.534<br>(0.391–0.675) |

**Appendix Table 6. GBD 2016 sequelae, health states, health state lay descriptions, and disability weights**

| Sequela                                                                                             | Health state name                                                                        | Health state lay description | Disability weight      |
|-----------------------------------------------------------------------------------------------------|------------------------------------------------------------------------------------------|------------------------------|------------------------|
| Severe motor impairment, borderline intellectual disability and incontinence due to encephalocele   | Severe motor impairment, borderline intellectual functioning, and urinary incontinence   | (combined DW)                | 0.489<br>(0.353–0.632) |
| Severe motor impairment, profound intellectual disability and incontinence due to encephalocele     | Severe motor impairment with severe intellectual disability and incontinence             | (combined DW)                | 0.564<br>(0.418–0.71)  |
| Severe motor impairment, mild intellectual disability and incontinence due to encephalocele         | Severe motor impairment with mild intellectual disability and incontinence               | (combined DW)                | 0.505<br>(0.367–0.647) |
| profound motor impairment, profound intellectual disability and incontinence due to spina bifida    | Severe motor impairment with profound intellectual disability and incontinence           | (combined DW)                | 0.584<br>(0.435–0.73)  |
| Severe motor impairment and mild intellectual disability due to spina bifida                        | Severe motor impairment with mild intellectual disability                                | (combined DW)                | 0.427<br>(0.3–0.567)   |
| Severe motor impairment and mild intellectual disability due to encephalocele                       | Severe motor impairment with mild intellectual disability                                | (combined DW)                | 0.427<br>(0.3–0.567)   |
| Severe motor impairment, severe intellectual disability and incontinence due to encephalocele       | Severe motor impairment with severe intellectual disability and incontinence             | (combined DW)                | 0.564<br>(0.418–0.71)  |
| Severe motor impairment, mild intellectual disability and incontinence due to spina bifida          | Severe motor impairment with mild intellectual disability and incontinence               | (combined DW)                | 0.505<br>(0.367–0.647) |
| Mild motor impairment and incontinence due to spina bifida                                          | Mild motor impairment and urinary incontinence                                           | (combined DW)                | 0.148<br>(0.1–0.207)   |
| Mild motor impairment, severe intellectual disability and incontinence due to encephalocele         | Mild motor impairment, severe intellectual functioning, and urinary incontinence         | (combined DW)                | 0.284<br>(0.201–0.385) |
| Moderate motor impairment, severe intellectual disability and incontinence due to spina bifida      | Moderate motor impairment, severe intellectual functioning, and urinary incontinence     | (combined DW)                | 0.32<br>(0.228–0.429)  |
| Moderate motor impairment, severe intellectual disability and incontinence due to encephalocele     | Moderate motor impairment, severe intellectual functioning, and urinary incontinence     | (combined DW)                | 0.32<br>(0.228–0.429)  |
| Severe motor impairment and moderate intellectual disability due to spina bifida                    | Severe motor impairment with moderate intellectual disability                            | (combined DW)                | 0.461<br>(0.324–0.603) |
| Mild motor impairment and incontinence due to encephalocele                                         | Mild motor impairment and urinary incontinence                                           | (combined DW)                | 0.148<br>(0.1–0.207)   |
| Moderate motor impairment and incontinence due to spina bifida                                      | Moderate motor impairment and urinary incontinence                                       | (combined DW)                | 0.191<br>(0.132–0.263) |
| Moderate motor impairment and incontinence due to encephalocele                                     | Moderate motor impairment and urinary incontinence                                       | (combined DW)                | 0.191<br>(0.132–0.263) |
| Mild motor impairment, profound intellectual disability and incontinence due to spina bifida        | Mild motor impairment, profound intellectual functioning, and urinary incontinence       | (combined DW)                | 0.318<br>(0.224–0.426) |
| Moderate motor impairment, profound intellectual disability and incontinence due to encephalocele   | Mild motor impairment, profound intellectual functioning, and urinary incontinence       | (combined DW)                | 0.318<br>(0.224–0.426) |
| Mild motor impairment and profound intellectual disability due to spina bifida                      | Mild motor impairment with profound intellectual disability                              | (combined DW)                | 0.208<br>(0.142–0.289) |
| Mild motor impairment, severe intellectual disability and incontinence due to spina bifida          | Mild motor impairment, severe intellectual functioning, and urinary incontinence         | (combined DW)                | 0.284<br>(0.201–0.385) |
| Severe motor impairment and moderate intellectual disability due to encephalocele                   | Severe motor impairment with moderate intellectual disability                            | (combined DW)                | 0.461<br>(0.324–0.603) |
| Severe motor impairment and profound intellectual disability due to spina bifida                    | Severe motor impairment with profound intellectual disability                            | (combined DW)                | 0.519<br>(0.37–0.668)  |
| Severe motor impairment and severe intellectual disability due to encephalocele                     | Severe motor impairment with severe intellectual disability                              | (combined DW)                | 0.496<br>(0.355–0.641) |
| Severe motor impairment, borderline intellectual disability and incontinence due to spina bifida    | Severe motor impairment, borderline intellectual functioning, and urinary incontinence   | (combined DW)                | 0.489<br>(0.353–0.632) |
| Mild motor impairment, mild intellectual disability and incontinence due to encephalocele           | Mild motor impairment, mild intellectual functioning, and urinary incontinence           | (combined DW)                | 0.184<br>(0.128–0.253) |
| Moderate motor impairment, borderline intellectual disability and incontinence due to encephalocele | Moderate motor impairment, borderline intellectual functioning, and urinary incontinence | (combined DW)                | 0.2<br>(0.139–0.273)   |
| Moderate motor impairment, borderline intellectual disability and incontinence due to spina bifida  | Moderate motor impairment, borderline intellectual functioning, and urinary incontinence | (combined DW)                | 0.2<br>(0.139–0.273)   |
| Mild motor impairment, borderline intellectual disability and incontinence due to encephalocele     | Mild motor impairment, borderline intellectual functioning, and urinary incontinence     | (combined DW)                | 0.157<br>(0.108–0.218) |
| Mild motor impairment, borderline intellectual disability and incontinence due to spina bifida      | Mild motor impairment, borderline intellectual functioning, and urinary incontinence     | (combined DW)                | 0.157<br>(0.108–0.218) |
| Moderate motor impairment and severe intellectual disability due to encephalocele                   | Moderate motor impairment and severe intellectual functioning                            | (combined DW)                | 0.211<br>(0.145–0.293) |
| Moderate motor impairment and severe intellectual disability due to spina bifida                    | Moderate motor impairment and severe intellectual functioning                            | (combined DW)                | 0.211<br>(0.145–0.293) |
| Moderate motor impairment, mild intellectual disability and incontinence due to spina bifida        | Moderate motor impairment, mild intellectual functioning, and urinary incontinence       | (combined DW)                | 0.272<br>(0.191–0.364) |
| Mild motor impairment and severe intellectual disability due to spina bifida                        | Mild motor impairment and severe intellectual functioning                                | (combined DW)                | 0.169<br>(0.113–0.237) |
| Mild motor impairment and moderate intellectual disability due to encephalocele                     | Mild motor impairment and moderate intellectual functioning                              | (combined DW)                | 0.109<br>(0.073–0.154) |
| Mild motor impairment and moderate intellectual disability due to spina bifida                      | Mild motor impairment and moderate intellectual functioning                              | (combined DW)                | 0.109<br>(0.073–0.154) |
| Moderate motor impairment and mild intellectual disability due to encephalocele                     | Moderate motor impairment and mild intellectual functioning                              | (combined DW)                | 0.101<br>(0.066–0.146) |
| Moderate motor impairment, mild intellectual disability and incontinence due to encephalocele       | Moderate motor impairment, mild intellectual functioning, and urinary incontinence       | (combined DW)                | 0.272<br>(0.191–0.364) |
| Mild motor impairment, moderate intellectual disability and incontinence due to spina bifida        | Mild motor impairment, moderate intellectual functioning, and urinary incontinence       | (combined DW)                | 0.233<br>(0.161–0.314) |
| Mild motor impairment, moderate intellectual disability and incontinence due to encephalocele       | Mild motor impairment, moderate intellectual functioning, and urinary incontinence       | (combined DW)                | 0.233<br>(0.161–0.314) |
| Moderate motor impairment and mild intellectual disability due to spina bifida                      | Moderate motor impairment and mild intellectual functioning                              | (combined DW)                | 0.101<br>(0.066–0.146) |

| Appendix Table 6. GBD 2016 sequelae, health states, health state lay descriptions, and disability weights |                                                                                        |                                                                                                                                                                                                                                           |                        |
|-----------------------------------------------------------------------------------------------------------|----------------------------------------------------------------------------------------|-------------------------------------------------------------------------------------------------------------------------------------------------------------------------------------------------------------------------------------------|------------------------|
| Sequela                                                                                                   | Health state name                                                                      | Health state lay description                                                                                                                                                                                                              | Disability weight      |
| Mild motor impairment, mild intellectual disability and incontinence due to spina bifida                  | Mild motor impairment, mild intellectual functioning, and urinary incontinence         | (combined DW)                                                                                                                                                                                                                             | 0.184<br>(0.128–0.253) |
| Borderline intellectual disability and incontinence due to encephalocele                                  | Borderline intellectual functioning and urinary incontinence                           | (combined DW)                                                                                                                                                                                                                             | 0.148<br>(0.101–0.206) |
| Moderate motor impairment, moderate intellectual disability and incontinence due to encephalocele         | Moderate motor impairment, moderate intellectual functioning, and urinary incontinence | (combined DW)                                                                                                                                                                                                                             | 0.272<br>(0.191–0.364) |
| Moderate motor impairment, moderate intellectual disability and incontinence due to spina bifida          | Moderate motor impairment, moderate intellectual functioning, and urinary incontinence | (combined DW)                                                                                                                                                                                                                             | 0.272<br>(0.191–0.364) |
| Mild intellectual disability and incontinence due to encephalocele                                        | Mild intellectual disability and urinary incontinence                                  | (combined DW)                                                                                                                                                                                                                             | 0.176<br>(0.12–0.242)  |
| Moderate intellectual disability and incontinence due to encephalocele                                    | Moderate intellectual disability and urinary incontinence                              | (combined DW)                                                                                                                                                                                                                             | 0.225<br>(0.156–0.304) |
| Severe motor impairment and severe intellectual disability due to spina bifida                            | Severe motor impairment with severe intellectual disability                            | (combined DW)                                                                                                                                                                                                                             | 0.496<br>(0.355–0.641) |
| Severe intellectual disability and incontinence due to encephalocele                                      | Severe intellectual disability and urinary incontinence                                | (combined DW)                                                                                                                                                                                                                             | 0.276<br>(0.194–0.376) |
| Mild motor impairment and borderline intellectual disability due to spina bifida                          | Mild motor impairment and borderline intellectual functioning                          | (combined DW)                                                                                                                                                                                                                             | 0.021<br>(0.01–0.039)  |
| Mild motor impairment and borderline intellectual disability due to encephalocele                         | Mild motor impairment and borderline intellectual functioning                          | (combined DW)                                                                                                                                                                                                                             | 0.021<br>(0.01–0.039)  |
| Moderate motor impairment and borderline intellectual disability due to spina bifida                      | Moderate motor impairment and borderline intellectual functioning                      | (combined DW)                                                                                                                                                                                                                             | 0.071<br>(0.045–0.106) |
| Moderate motor impairment and borderline intellectual disability due to encephalocele                     | Moderate motor impairment and borderline intellectual functioning                      | (combined DW)                                                                                                                                                                                                                             | 0.071<br>(0.045–0.106) |
| Severe motor impairment and borderline intellectual disability due to spina bifida                        | Severe motor impairment and borderline intellectual functioning                        | (combined DW)                                                                                                                                                                                                                             | 0.408<br>(0.279–0.55)  |
| Severe motor impairment and borderline intellectual disability due to encephalocele                       | Severe motor impairment and borderline intellectual functioning                        | (combined DW)                                                                                                                                                                                                                             | 0.408<br>(0.279–0.55)  |
| Profound intellectual disability and incontinence due to encephalocele                                    | Profound intellectual disability and urinary incontinence                              | (combined DW)                                                                                                                                                                                                                             | 0.311<br>(0.217–0.418) |
| Mild motor impairment and severe intellectual disability due to encephalocele                             | Mild motor impairment and severe intellectual functioning                              | (combined DW)                                                                                                                                                                                                                             | 0.169<br>(0.113–0.237) |
| Moderate motor impairment, profound intellectual disability and incontinence due to spina bifida          | Moderate motor impairment with profound intellectual disability and incontinence       | (combined DW)                                                                                                                                                                                                                             | 0.352<br>(0.254–0.465) |
| Moderate intellectual disability due to encephalocele                                                     | Intellectual disability / mental retardation, moderate                                 | has low intelligence, and is slow in learning to speak and to do even simple tasks. As an adult, the person requires a lot of support to live independently and raise children. The person can only work at the simplest supervised jobs. | 0.1<br>(0.066–0.142)   |
| Incontinence due to encephalocele                                                                         | Urinary incontinence                                                                   | cannot control urinating.                                                                                                                                                                                                                 | 0.139<br>(0.094–0.198) |
| Moderate motor impairment due to spina bifida                                                             | Motor impairment, moderate                                                             | has some difficulty in moving around, and difficulty in lifting and holding objects, dressing and sitting upright, but is able to walk without help.                                                                                      | 0.061<br>(0.04–0.089)  |
| Moderate motor impairment due to encephalocele                                                            | Motor impairment, moderate                                                             | has some difficulty in moving around, and difficulty in lifting and holding objects, dressing and sitting upright, but is able to walk without help.                                                                                      | 0.061<br>(0.04–0.089)  |
| Borderline intellectual disability due to encephalocele                                                   | Borderline intellectual functioning                                                    | is slow in learning at school. As an adult, the person has some difficulty doing complex or unfamiliar tasks but otherwise functions independently.                                                                                       | 0.011<br>(0.005–0.02)  |
| Severe motor impairment and incontinence due to spina bifida                                              | Severe motor impairment with incontinence                                              | (combined DW)                                                                                                                                                                                                                             | --                     |
| Severe motor impairment and incontinence due to encephalocele                                             | Severe motor impairment with incontinence                                              | (combined DW)                                                                                                                                                                                                                             | --                     |
| Mild motor impairment and profound intellectual disability due to encephalocele                           | Severe motor impairment with incontinence                                              | (combined DW)                                                                                                                                                                                                                             | --                     |
| Moderate motor impairment and profound intellectual disability due to encephalocele                       | Severe motor impairment with incontinence                                              | (combined DW)                                                                                                                                                                                                                             | --                     |
| Severe motor and cognitive impairment due to anencephaly                                                  | Motor plus cognitive impairments, severe                                               | cannot move around without help, and cannot lift or hold objects, get dressed or sit upright. The person also has very low intelligence, speaks few words, and needs constant supervision and help with all daily activities.             | 0.542<br>(0.374–0.702) |
| Severe motor impairment and profound intellectual disability due to encephalocele                         | Severe motor impairment with incontinence                                              | (combined DW)                                                                                                                                                                                                                             | --                     |
| Mild intellectual disability due to encephalocele                                                         | Intellectual disability / mental retardation, mild                                     | has low intelligence and is slow in learning at school. As an adult, the person can live independently, but often needs help to raise children and can only work at simple supervised jobs.                                               | 0.043<br>(0.026–0.064) |
| Moderate motor impairment and moderate intellectual disability due to encephalocele                       | Motor plus cognitive impairments, moderate                                             | has some difficulty in moving around, holding objects, dressing and sitting upright, but can walk without help. The person has low intelligence and is slow in learning to speak and to do simple tasks.                                  | 0.203<br>(0.134–0.29)  |
| Mild motor impairment and mild intellectual disability due to encephalocele                               | Motor plus cognitive impairments, mild                                                 | has some difficulty in moving around but is able to walk without help. The person is slow in learning at school. As an adult, the person has some difficulty doing complex or unfamiliar tasks but otherwise functions independently.     | 0.031<br>(0.018–0.05)  |
| Mild motor impairment and mild intellectual disability due to spina bifida                                | Motor plus cognitive impairments, mild                                                 | has some difficulty in moving around but is able to walk without help. The person is slow in learning at school. As an adult, the person has some difficulty doing complex or unfamiliar tasks but otherwise functions independently.     | 0.031<br>(0.018–0.05)  |
| Severe motor impairment due to encephalocele                                                              | Motor impairment, severe                                                               | is unable to move around without help, and is not able to lift or hold objects, get dressed or sit upright.                                                                                                                               | 0.402<br>(0.268–0.545) |

**Appendix Table 6. GBD 2016 sequelae, health states, health state lay descriptions, and disability weights**

| Sequela                                                                                                                                                                                                | Health state name                                                                         | Health state lay description                                                                                                                                                                             | Disability weight      |
|--------------------------------------------------------------------------------------------------------------------------------------------------------------------------------------------------------|-------------------------------------------------------------------------------------------|----------------------------------------------------------------------------------------------------------------------------------------------------------------------------------------------------------|------------------------|
| Severe motor impairment due to spina bifida                                                                                                                                                            | Motor impairment, severe                                                                  | is unable to move around without help, and is not able to lift or hold objects, get dressed or sit upright.                                                                                              | 0.402<br>(0.268–0.545) |
| Profound intellectual disability due to encephalocele                                                                                                                                                  | Intellectual disability / mental retardation, profound                                    | has very low intelligence, has almost no language, and does not understand even the most basic requests or instructions. The person requires constant supervision and help for all activities.           | 0.2<br>(0.133–0.283)   |
| Moderate motor impairment and profound intellectual disability due to spina bifida                                                                                                                     | Moderate motor impairment with profound intellectual disability                           | (combined DW)                                                                                                                                                                                            | 0.249<br>(0.174–0.338) |
| Severe intellectual disability due to encephalocele                                                                                                                                                    | Intellectual disability / mental retardation, severe                                      | has very low intelligence and cannot speak more than a few words, needs constant supervision and help with most daily activities, and can do only the simplest tasks.                                    | 0.16<br>(0.107–0.226)  |
| Mild motor impairment, profound intellectual disability and incontinence due to encephalocele                                                                                                          | Severe motor impairment with incontinence                                                 | (combined DW)                                                                                                                                                                                            | --                     |
| Mild motor impairment due to spina bifida                                                                                                                                                              | Motor impairment, mild                                                                    | has some difficulty in moving around but is able to walk without help.                                                                                                                                   | 0.01<br>(0.005–0.019)  |
| Asymptomatic encephalocele following treatment                                                                                                                                                         | Asymptomatic                                                                              | --                                                                                                                                                                                                       | --                     |
| Mild motor impairment due to encephalocele                                                                                                                                                             | Motor impairment, mild                                                                    | has some difficulty in moving around but is able to walk without help.                                                                                                                                   | 0.01<br>(0.005–0.019)  |
| Moderate motor impairment and moderate intellectual disability due to spina bifida                                                                                                                     | Motor plus cognitive impairments, moderate                                                | has some difficulty in moving around, holding objects, dressing and sitting upright, but can walk without help. The person has low intelligence and is slow in learning to speak and to do simple tasks. | 0.203<br>(0.134–0.29)  |
| Congenital heart disease, borderline intellectual disability and mild heart failure due to severe congenital heart anomalies excluding single ventricle heart defects                                  | Congenital heart disease, borderline intellectual functioning, and mild heart failure     | (combined DW)                                                                                                                                                                                            | 0.052<br>(0.032–0.081) |
| Congenital heart disease, borderline intellectual disability and mild heart failure due to critical malformations of great vessels, congenital valvular heart disease and patent ductus arteriosus     | Congenital heart disease, borderline intellectual functioning, and mild heart failure     | (combined DW)                                                                                                                                                                                            | 0.052<br>(0.032–0.081) |
| Congenital heart disease, borderline intellectual disability and mild heart failure due to ventricular septal defect and atrial septal defect                                                          | Congenital heart disease, borderline intellectual functioning, and mild heart failure     | (combined DW)                                                                                                                                                                                            | 0.052<br>(0.032–0.081) |
| Congenital heart disease, severe intellectual disability and moderate heart failure due to severe congenital heart anomalies excluding single ventricle heart defects                                  | Congenital heart disease, severe intellectual disability, and moderate heart failure      | (combined DW)                                                                                                                                                                                            | 0.22<br>(0.151–0.302)  |
| Congenital heart disease, borderline intellectual disability and moderate heart failure due to severe congenital heart anomalies excluding single ventricle heart defects                              | Congenital heart disease, borderline intellectual functioning, and moderate heart failure | (combined DW)                                                                                                                                                                                            | 0.082<br>(0.053–0.12)  |
| Congenital heart disease, borderline intellectual disability and moderate heart failure due to critical malformations of great vessels, congenital valvular heart disease and patent ductus arteriosus | Congenital heart disease, borderline intellectual functioning, and moderate heart failure | (combined DW)                                                                                                                                                                                            | 0.082<br>(0.053–0.12)  |
| Congenital heart disease, borderline intellectual disability and moderate heart failure due to ventricular septal defect and atrial septal defect                                                      | Congenital heart disease, borderline intellectual functioning, and moderate heart failure | (combined DW)                                                                                                                                                                                            | 0.082<br>(0.053–0.12)  |
| Congenital heart disease, borderline intellectual disability and mild heart failure due to single ventricle and single ventricle pathway heart defects                                                 | Congenital heart disease, borderline intellectual functioning, and mild heart failure     | (combined DW)                                                                                                                                                                                            | 0.052<br>(0.032–0.081) |
| Congenital heart disease, borderline intellectual disability and severe heart failure due to severe congenital heart anomalies excluding single ventricle heart defects                                | Congenital heart disease, borderline intellectual functioning, and severe heart failure   | (combined DW)                                                                                                                                                                                            | 0.188<br>(0.13–0.258)  |
| Congenital heart disease, borderline intellectual disability and severe heart failure due to critical malformations of great vessels, congenital valvular heart disease and patent ductus arteriosus   | Congenital heart disease, borderline intellectual functioning, and severe heart failure   | (combined DW)                                                                                                                                                                                            | 0.188<br>(0.13–0.258)  |
| Congenital heart disease, borderline intellectual disability and severe heart failure due to ventricular septal defect and atrial septal defect                                                        | Congenital heart disease, borderline intellectual functioning, and severe heart failure   | (combined DW)                                                                                                                                                                                            | 0.188<br>(0.13–0.258)  |
| Congenital heart disease, mild intellectual disability and mild heart failure due to single ventricle and single ventricle pathway heart defects                                                       | Congenital heart disease, mild intellectual disability, and mild heart failure            | (combined DW)                                                                                                                                                                                            | 0.082<br>(0.052–0.121) |
| Congenital heart disease, mild intellectual disability and mild heart failure due to severe congenital heart anomalies excluding single ventricle heart defects                                        | Congenital heart disease, mild intellectual disability, and mild heart failure            | (combined DW)                                                                                                                                                                                            | 0.082<br>(0.052–0.121) |
| Congenital heart disease, borderline intellectual disability and moderate heart failure due to single ventricle and single ventricle pathway heart defects                                             | Congenital heart disease, borderline intellectual functioning, and moderate heart failure | (combined DW)                                                                                                                                                                                            | 0.082<br>(0.053–0.12)  |
| Congenital heart disease, borderline intellectual disability and severe heart failure due to single ventricle and single ventricle pathway heart defects                                               | Congenital heart disease, borderline intellectual functioning, and severe heart failure   | (combined DW)                                                                                                                                                                                            | 0.188<br>(0.13–0.258)  |
| Congenital heart disease and severe heart failure without intellectual disability due to severe congenital heart anomalies excluding single ventricle heart defects                                    | Congenital heart disease and severe heart failure                                         | (combined DW)                                                                                                                                                                                            | 0.179<br>(0.122–0.251) |
| Congenital heart disease and severe heart failure without intellectual disability due to critical malformations of great vessels, congenital valvular heart disease and patent ductus arteriosus       | Congenital heart disease and severe heart failure                                         | (combined DW)                                                                                                                                                                                            | 0.179<br>(0.122–0.251) |
| Congenital heart disease, severe intellectual disability and moderate heart failure due to single ventricle and single ventricle pathway heart defects                                                 | Congenital heart disease, severe intellectual disability, and moderate heart failure      | (combined DW)                                                                                                                                                                                            | 0.22<br>(0.151–0.302)  |
| Congenital heart disease, profound intellectual disability and severe heart failure due to ventricular septal defect and atrial septal defect                                                          | Congenital heart disease, profound intellectual disability, and severe heart failure      | (combined DW)                                                                                                                                                                                            | 0.342<br>(0.239–0.457) |
| Congenital heart disease, profound intellectual disability and severe heart failure due to critical malformations of great vessels, congenital valvular heart disease and patent ductus arteriosus     | Congenital heart disease, profound intellectual disability, and severe heart failure      | (combined DW)                                                                                                                                                                                            | 0.342<br>(0.239–0.457) |
| Congenital heart disease, profound intellectual disability and severe heart failure due to severe congenital heart anomalies excluding single ventricle heart defects                                  | Congenital heart disease, profound intellectual disability, and severe heart failure      | (combined DW)                                                                                                                                                                                            | 0.342<br>(0.239–0.457) |







**Appendix Table 6. GBD 2016 sequelae, health states, health state lay descriptions, and disability weights**

| Sequela                                                                                                                                                                                              | Health state name                                                                      | Health state lay description                                                                                                                                                                   | Disability weight      |
|------------------------------------------------------------------------------------------------------------------------------------------------------------------------------------------------------|----------------------------------------------------------------------------------------|------------------------------------------------------------------------------------------------------------------------------------------------------------------------------------------------|------------------------|
| Congenital heart disease, mild intellectual disability and severe heart failure due to ventricular septal defect and atrial septal defect                                                            | Congenital heart disease, mild intellectual disability, and severe heart failure       | (combined DW)                                                                                                                                                                                  | 0.214<br>(0.148–0.291) |
| Congenital heart disease without intellectual disability or heart failure due to other congenital cardiovascular anomalies                                                                           | Congenital heart disease                                                               | (custom DW from MEPS)                                                                                                                                                                          | --                     |
| Congenital heart disease without intellectual disability or heart failure due to single ventricle and single ventricle pathway heart defects                                                         | Congenital heart disease                                                               | (custom DW from MEPS)                                                                                                                                                                          | --                     |
| Congenital heart disease and mild intellectual disability without heart failure due to single ventricle and single ventricle pathway heart defects                                                   | Congenital heart disease and Intellectual disability / mental retardation, mild        | (combined DW)                                                                                                                                                                                  | 0.043<br>(0.026–0.064) |
| Congenital heart disease without heart failure or intellectual disability due to critical malformations of great vessels, congenital valvular heart disease and patent ductus arteriosus             | Congenital heart disease                                                               | (custom DW from MEPS)                                                                                                                                                                          | --                     |
| Congenital heart disease without heart failure or intellectual disability due to ventricular septal defect and atrial septal defect                                                                  | Congenital heart disease                                                               | (custom DW from MEPS)                                                                                                                                                                          | --                     |
| Congenital heart disease, moderate intellectual disability and mild heart failure due to single ventricle and single ventricle pathway heart defects                                                 | Congenital heart disease, moderate intellectual disability, and mild heart failure     | (combined DW)                                                                                                                                                                                  | 0.137<br>(0.093–0.191) |
| Congenital heart disease and borderline intellectual disability without heart failure due to other congenital cardiovascular anomalies                                                               | Congenital heart disease and borderline intellectual functioning                       | (combined DW)                                                                                                                                                                                  | 0.011<br>(0.005–0.02)  |
| Congenital heart disease without intellectual disability or heart failure due to severe congenital heart anomalies excluding single ventricle heart defects                                          | Congenital heart disease                                                               | (custom DW from MEPS)                                                                                                                                                                          | --                     |
| Congenital heart disease and borderline intellectual disability without heart failure due to severe congenital heart anomalies excluding single ventricle heart defects                              | Congenital heart disease and borderline intellectual functioning                       | (combined DW)                                                                                                                                                                                  | 0.011<br>(0.005–0.02)  |
| Congenital heart disease, moderate intellectual disability and moderate heart failure due to ventricular septal defect and atrial septal defect                                                      | Congenital heart disease, moderate intellectual disability, and moderate heart failure | (combined DW)                                                                                                                                                                                  | 0.164<br>(0.112–0.225) |
| Congenital heart disease, moderate intellectual disability and moderate heart failure due to critical malformations of great vessels, congenital valvular heart disease and patent ductus arteriosus | Congenital heart disease, moderate intellectual disability, and moderate heart failure | (combined DW)                                                                                                                                                                                  | 0.164<br>(0.112–0.225) |
| Congenital heart disease and borderline intellectual disability without heart failure due to single ventricle and single ventricle pathway heart defects                                             | Congenital heart disease and borderline intellectual functioning                       | (combined DW)                                                                                                                                                                                  | 0.011<br>(0.005–0.02)  |
| Congenital heart disease, moderate intellectual disability and moderate heart failure due to single ventricle and single ventricle pathway heart defects                                             | Congenital heart disease, moderate intellectual disability, and moderate heart failure | (combined DW)                                                                                                                                                                                  | 0.164<br>(0.112–0.225) |
| Congenital heart disease, moderate intellectual disability and mild heart failure due to ventricular septal defect and atrial septal defect                                                          | Congenital heart disease, moderate intellectual disability, and mild heart failure     | (combined DW)                                                                                                                                                                                  | 0.137<br>(0.093–0.191) |
| Congenital heart disease, moderate intellectual disability and moderate heart failure due to severe congenital heart anomalies excluding single ventricle heart defects                              | Congenital heart disease, moderate intellectual disability, and moderate heart failure | (combined DW)                                                                                                                                                                                  | 0.164<br>(0.112–0.225) |
| Congenital heart disease, moderate intellectual disability and mild heart failure due to severe congenital heart anomalies excluding single ventricle heart defects                                  | Congenital heart disease, moderate intellectual disability, and mild heart failure     | (combined DW)                                                                                                                                                                                  | 0.137<br>(0.093–0.191) |
| Congenital heart disease and borderline intellectual disability without heart failure due to ventricular septal defect and atrial septal defect                                                      | Congenital heart disease and borderline intellectual functioning                       | (combined DW)                                                                                                                                                                                  | 0.011<br>(0.005–0.02)  |
| Congenital heart disease and borderline intellectual disability without heart failure due to critical malformations of great vessels, congenital valvular heart disease and patent ductus arteriosus | Congenital heart disease and borderline intellectual functioning                       | (combined DW)                                                                                                                                                                                  | 0.011<br>(0.005–0.02)  |
| Congenital heart disease, moderate intellectual disability and mild heart failure due to critical malformations of great vessels, congenital valvular heart disease and patent ductus arteriosus     | Congenital heart disease, moderate intellectual disability, and mild heart failure     | (combined DW)                                                                                                                                                                                  | 0.137<br>(0.093–0.191) |
| Disfigurement level 2 and speech problems due to orofacial clefts                                                                                                                                    | Speech problems with disfigurement level 2                                             | (combined DW)                                                                                                                                                                                  | --                     |
| Asymptomatic orofacial clefts                                                                                                                                                                        | Asymptomatic                                                                           | --                                                                                                                                                                                             | --                     |
| Disfigurement level 2 due to orofacial clefts                                                                                                                                                        | Disfigurement, level 2                                                                 | has a visible physical deformity that causes others to stare and comment. As a result, the person is worried and has trouble sleeping and concentrating.                                       | 0.067<br>(0.044–0.096) |
| Disfigurement level 1 due to orofacial clefts                                                                                                                                                        | Disfigurement, level 1                                                                 | has a slight, visible physical deformity that others notice, which causes some worry and discomfort.                                                                                           | 0.011<br>(0.005–0.021) |
| Severe intellectual disability and moderate dementia due to Down syndrome                                                                                                                            | Moderate dementia, severe intellectual disability                                      | (combined DW)                                                                                                                                                                                  | 0.475<br>(0.34–0.614)  |
| Profound intellectual disability and moderate dementia due to Down syndrome                                                                                                                          | Moderate dementia, profound intellectual disability                                    | (combined DW)                                                                                                                                                                                  | 0.499<br>(0.358–0.645) |
| Borderline intellectual disability and severe dementia due to Down syndrome                                                                                                                          | Severe dementia, borderline intellectual disability                                    | (combined DW)                                                                                                                                                                                  | 0.455<br>(0.316–0.597) |
| Mild intellectual disability and severe dementia due to Down syndrome                                                                                                                                | Severe dementia, mild intellectual disability                                          | (combined DW)                                                                                                                                                                                  | 0.472<br>(0.332–0.615) |
| Moderate intellectual disability and moderate dementia due to Down syndrome                                                                                                                          | Moderate dementia, moderate intellectual disability                                    | (combined DW)                                                                                                                                                                                  | 0.438<br>(0.311–0.576) |
| Severe intellectual disability and severe dementia due to Down syndrome                                                                                                                              | Severe dementia, severe intellectual disability                                        | (combined DW)                                                                                                                                                                                  | 0.535<br>(0.384–0.681) |
| Profound intellectual disability and severe dementia due to Down syndrome                                                                                                                            | Severe dementia, profound intellectual disability                                      | (combined DW)                                                                                                                                                                                  | 0.557<br>(0.401–0.703) |
| Severe intellectual disability due to Down syndrome                                                                                                                                                  | Intellectual disability / mental retardation, severe                                   | has very low intelligence and cannot speak more than a few words, needs constant supervision and help with most daily activities, and can do only the simplest tasks.                          | 0.16<br>(0.107–0.226)  |
| Profound intellectual disability due to Down syndrome                                                                                                                                                | Intellectual disability / mental retardation, profound                                 | has very low intelligence, has almost no language, and does not understand even the most basic requests or instructions. The person requires constant supervision and help for all activities. | 0.2<br>(0.133–0.283)   |



**Appendix Table 6. GBD 2016 sequelae, health states, health state lay descriptions, and disability weights**

| Sequela                                                                                                  | Health state name                                                               | Health state lay description                                                                                                                                                                                                              | Disability weight      |
|----------------------------------------------------------------------------------------------------------|---------------------------------------------------------------------------------|-------------------------------------------------------------------------------------------------------------------------------------------------------------------------------------------------------------------------------------------|------------------------|
| Moderate intellectual disability and severe dementia due to Down syndrome                                | Severe dementia, moderate intellectual disability                               | (combined DW)                                                                                                                                                                                                                             | 0.503<br>(0.355–0.646) |
| Mild intellectual disability and moderate dementia due to Down syndrome                                  | Moderate dementia, mild intellectual disability                                 | (combined DW)                                                                                                                                                                                                                             | 0.403<br>(0.281–0.536) |
| Borderline intellectual disability and mild dementia due to Down syndrome                                | Mild dementia, borderline intellectual disability                               | (combined DW)                                                                                                                                                                                                                             | 0.079<br>(0.051–0.115) |
| Severe intellectual disability, severe dementia, and congenital heart disease due to Down syndrome       | Congenital heart disease, severe dementia, severe intellectual disability       | (combined DW)                                                                                                                                                                                                                             | 0.535<br>(0.384–0.681) |
| Moderate intellectual disability with congenital heart disease due to Down syndrome                      | Moderate intellectual disability with congenital heart disease                  | (combined DW)                                                                                                                                                                                                                             | 0.1<br>(0.066–0.142)   |
| Severe intellectual disability with congenital heart disease due to Down syndrome                        | Severe intellectual disability with congenital heart disease                    | (combined DW)                                                                                                                                                                                                                             | 0.16<br>(0.107–0.226)  |
| Moderate intellectual disability, mild dementia, and congenital heart disease due to Down syndrome       | Congenital heart disease, mild dementia, moderate intellectual disability       | (combined DW)                                                                                                                                                                                                                             | 0.162<br>(0.11–0.222)  |
| Profound intellectual disability with congenital heart disease due to Down syndrome                      | Profound intellectual disability with congenital heart disease                  | (combined DW)                                                                                                                                                                                                                             | 0.2<br>(0.133–0.283)   |
| Borderline intellectual disability due to Down syndrome                                                  | Borderline intellectual functioning                                             | is slow in learning at school. As an adult, the person has some difficulty doing complex or unfamiliar tasks but otherwise functions independently.                                                                                       | 0.011<br>(0.005–0.02)  |
| Moderate intellectual disability, severe dementia, and congenital heart disease due to Down syndrome     | Congenital heart disease, severe dementia, moderate intellectual disability     | (combined DW)                                                                                                                                                                                                                             | 0.503<br>(0.355–0.646) |
| Mild intellectual disability due to Down syndrome                                                        | Intellectual disability / mental retardation, mild                              | has low intelligence and is slow in learning at school. As an adult, the person can live independently, but often needs help to raise children and can only work at simple supervised jobs.                                               | 0.043<br>(0.026–0.064) |
| Moderate intellectual disability due to Down syndrome                                                    | Intellectual disability / mental retardation, moderate                          | has low intelligence, and is slow in learning to speak and to do even simple tasks. As an adult, the person requires a lot of support to live independently and raise children. The person can only work at the simplest supervised jobs. | 0.1<br>(0.066–0.142)   |
| Congenital heart disease and mild dementia due to Down syndrome                                          | Congenital heart disease and mild dementia                                      | (combined DW)                                                                                                                                                                                                                             | 0.069<br>(0.046–0.099) |
| Congenital heart disease and moderate dementia due to Down syndrome                                      | Congenital heart disease and moderate dementia                                  | (combined DW)                                                                                                                                                                                                                             | 0.377<br>(0.252–0.508) |
| Mild intellectual disability, severe dementia, and congenital heart disease due to Down syndrome         | Congenital heart disease, severe dementia, mild intellectual disability         | (combined DW)                                                                                                                                                                                                                             | 0.472<br>(0.332–0.615) |
| Borderline intellectual disability, severe dementia, and congenital heart disease due to Down syndrome   | Congenital heart disease, severe dementia, borderline intellectual disability   | (combined DW)                                                                                                                                                                                                                             | 0.455<br>(0.316–0.597) |
| Congenital heart disease and severe dementia due to Down syndrome                                        | Congenital heart disease and severe dementia                                    | (combined DW)                                                                                                                                                                                                                             | 0.449<br>(0.304–0.595) |
| Profound intellectual disability, moderate dementia, and congenital heart disease due to Down syndrome   | Congenital heart disease, moderate dementia, profound intellectual disability   | (combined DW)                                                                                                                                                                                                                             | 0.499<br>(0.358–0.645) |
| Severe intellectual disability, moderate dementia, and congenital heart disease due to Down syndrome     | Congenital heart disease, moderate dementia, severe intellectual disability     | (combined DW)                                                                                                                                                                                                                             | 0.475<br>(0.34–0.614)  |
| Borderline intellectual disability, mild dementia, and congenital heart disease due to Down syndrome     | Congenital heart disease, mild dementia, borderline intellectual disability     | (combined DW)                                                                                                                                                                                                                             | 0.079<br>(0.051–0.115) |
| Moderate intellectual disability, moderate dementia, and congenital heart disease due to Down syndrome   | Congenital heart disease, moderate dementia, moderate intellectual disability   | (combined DW)                                                                                                                                                                                                                             | 0.438<br>(0.311–0.576) |
| Mild intellectual disability, moderate dementia, and congenital heart disease due to Down syndrome       | Congenital heart disease, moderate dementia, mild intellectual disability       | (combined DW)                                                                                                                                                                                                                             | 0.403<br>(0.281–0.536) |
| Mild intellectual disability, mild dementia, and congenital heart disease due to Down syndrome           | Congenital heart disease, mild dementia, mild intellectual disability           | (combined DW)                                                                                                                                                                                                                             | 0.109<br>(0.071–0.159) |
| Borderline intellectual disability, moderate dementia, and congenital heart disease due to Down syndrome | Congenital heart disease, moderate dementia, borderline intellectual disability | (combined DW)                                                                                                                                                                                                                             | 0.384<br>(0.262–0.517) |
| Profound intellectual disability, mild dementia, and congenital heart disease due to Down syndrome       | Congenital heart disease, mild dementia, profound intellectual disability       | (combined DW)                                                                                                                                                                                                                             | 0.255<br>(0.178–0.346) |
| Mild intellectual disability with congenital heart disease due to Down syndrome                          | Mild intellectual disability with congenital heart disease                      | (combined DW)                                                                                                                                                                                                                             | 0.043<br>(0.026–0.064) |
| Borderline intellectual disability with congenital heart disease due to Down syndrome                    | Borderline intellectual disability with congenital heart disease                | (combined DW)                                                                                                                                                                                                                             | 0.011<br>(0.005–0.02)  |
| Severe intellectual disability, mild dementia, and congenital heart disease due to Down syndrome         | Congenital heart disease, mild dementia, severe intellectual disability         | (combined DW)                                                                                                                                                                                                                             | 0.218<br>(0.149–0.299) |
| Borderline intellectual disability and moderate dementia due to Down syndrome                            | Moderate dementia, borderline intellectual disability                           | (combined DW)                                                                                                                                                                                                                             | 0.384<br>(0.262–0.517) |
| Isolated congenital heart disease due to Down syndrome                                                   | Congenital heart disease                                                        | (custom DW from MEPS)                                                                                                                                                                                                                     | --                     |
| Asymptomatic Down syndrome                                                                               | Asymptomatic                                                                    | --                                                                                                                                                                                                                                        | --                     |
| Profound intellectual disability, severe dementia, and congenital heart disease due to Down syndrome     | Congenital heart disease, severe dementia, profound intellectual disability     | (combined DW)                                                                                                                                                                                                                             | 0.557<br>(0.401–0.703) |
| Profound intellectual disability and mild dementia due to Down syndrome                                  | Mild dementia, profound intellectual disability                                 | (combined DW)                                                                                                                                                                                                                             | 0.255<br>(0.178–0.346) |
| Severe intellectual disability and mild dementia due to Down syndrome                                    | Mild dementia, severe intellectual disability                                   | (combined DW)                                                                                                                                                                                                                             | 0.218<br>(0.149–0.299) |
| Severe dementia due to Down syndrome                                                                     | Dementia, severe                                                                | has complete memory loss; no longer recognizes close family members; and requires help with all daily activities.                                                                                                                         | 0.449<br>(0.304–0.595) |
| Mild dementia due to Down syndrome                                                                       | Dementia, mild                                                                  | has some trouble remembering recent events, and finds it hard to concentrate and make decisions and plans.                                                                                                                                | 0.069<br>(0.046–0.099) |
| Moderate intellectual disability and mild dementia due to Down syndrome                                  | Mild dementia, moderate intellectual disability                                 | (combined DW)                                                                                                                                                                                                                             | 0.162<br>(0.11–0.222)  |
| Mild intellectual disability and mild dementia due to Down syndrome                                      | Mild dementia, mild intellectual disability                                     | (combined DW)                                                                                                                                                                                                                             | 0.109<br>(0.071–0.159) |

**Appendix Table 6. GBD 2016 sequelae, health states, health state lay descriptions, and disability weights**

| Sequela                                                                                                                | Health state name                                                           | Health state lay description                                                                                                                                                                                                              | Disability weight      |
|------------------------------------------------------------------------------------------------------------------------|-----------------------------------------------------------------------------|-------------------------------------------------------------------------------------------------------------------------------------------------------------------------------------------------------------------------------------------|------------------------|
| Moderate dementia due to Down syndrome                                                                                 | Dementia, moderate                                                          | has memory problems and confusion, feels disoriented, at times hears voices that are not real, and needs help with some daily activities.                                                                                                 | 0.377<br>(0.252–0.508) |
| Congenital heart disease due to Turner syndrome                                                                        | Congenital heart disease                                                    | (custom DW from MEPS)                                                                                                                                                                                                                     | --                     |
| Congenital heart disease with infertility due to Turner syndrome                                                       | Congenital heart disease with primary infertility                           | (combined DW)                                                                                                                                                                                                                             | --                     |
| Primary infertility due to Turner syndrome                                                                             | Infertility, primary                                                        | wants to have a child and has a fertile partner, but the couple cannot conceive.                                                                                                                                                          | 0.008<br>(0.003–0.015) |
| Asymptomatic Turner syndrome                                                                                           | Asymptomatic                                                                | --                                                                                                                                                                                                                                        | --                     |
| Mild intellectual disability due to Klinefelter syndrome                                                               | Intellectual disability / mental retardation, mild                          | has low intelligence and is slow in learning at school. As an adult, the person can live independently, but often needs help to raise children and can only work at simple supervised jobs.                                               | 0.043<br>(0.026–0.064) |
| Mild intellectual disability with infertility due to Klinefelter syndrome                                              | Mild intellectual disability with primary infertility                       | (combined DW)                                                                                                                                                                                                                             | --                     |
| Asymptomatic Klinefelter syndrome                                                                                      | Asymptomatic                                                                | --                                                                                                                                                                                                                                        | --                     |
| Borderline intellectual disability due to Klinefelter syndrome                                                         | Borderline intellectual functioning                                         | is slow in learning at school. As an adult, the person has some difficulty doing complex or unfamiliar tasks but otherwise functions independently.                                                                                       | 0.011<br>(0.005–0.02)  |
| Primary infertility due to Klinefelter syndrome                                                                        | Infertility, primary                                                        | wants to have a child and has a fertile partner, but the couple cannot conceive.                                                                                                                                                          | 0.008<br>(0.003–0.015) |
| Borderline intellectual disability with infertility due to Klinefelter syndrome                                        | Borderline intellectual disability with primary infertility                 | (combined DW)                                                                                                                                                                                                                             | --                     |
| Borderline intellectual disability with congenital heart disease due to other chromosomal abnormalities                | Borderline intellectual disability with congenital heart disease            | (combined DW)                                                                                                                                                                                                                             | 0.011<br>(0.005–0.02)  |
| Mild intellectual disability, mild dementia, and congenital heart disease due to other chromosomal abnormalities       | Congenital heart disease, mild dementia, mild intellectual disability       | (combined DW)                                                                                                                                                                                                                             | 0.109<br>(0.071–0.159) |
| Asymptomatic other chromosomal abnormalities                                                                           | Asymptomatic                                                                | --                                                                                                                                                                                                                                        | --                     |
| Mild intellectual disability with congenital heart disease due to other chromosomal abnormalities                      | Mild intellectual disability with congenital heart disease                  | (combined DW)                                                                                                                                                                                                                             | 0.043<br>(0.026–0.064) |
| Borderline intellectual disability, mild dementia, and congenital heart disease due to other chromosomal abnormalities | Congenital heart disease, mild dementia, borderline intellectual disability | (combined DW)                                                                                                                                                                                                                             | 0.079<br>(0.051–0.115) |
| Moderate intellectual disability with congenital heart disease due to other chromosomal abnormalities                  | Moderate intellectual disability with congenital heart disease              | (combined DW)                                                                                                                                                                                                                             | 0.1<br>(0.066–0.142)   |
| Isolated congenital heart disease due to other chromosomal abnormalities                                               | Congenital heart disease                                                    | (custom DW from MEPS)                                                                                                                                                                                                                     | --                     |
| Severe dementia due to other chromosomal abnormalities                                                                 | Dementia, severe                                                            | has complete memory loss; no longer recognizes close family members; and requires help with all daily activities.                                                                                                                         | 0.449<br>(0.304–0.595) |
| Borderline intellectual disability due to other chromosomal abnormalities                                              | Borderline intellectual functioning                                         | is slow in learning at school. As an adult, the person has some difficulty doing complex or unfamiliar tasks but otherwise functions independently.                                                                                       | 0.011<br>(0.005–0.02)  |
| Severe intellectual disability with congenital heart disease due to other chromosomal abnormalities                    | Severe intellectual disability with congenital heart disease                | (combined DW)                                                                                                                                                                                                                             | 0.16<br>(0.107–0.226)  |
| Congenital heart disease and moderate dementia due to other chromosomal abnormalities                                  | Congenital heart disease and moderate dementia                              | (combined DW)                                                                                                                                                                                                                             | 0.377<br>(0.252–0.508) |
| Profound intellectual disability with congenital heart disease due to other chromosomal abnormalities                  | Profound intellectual disability with congenital heart disease              | (combined DW)                                                                                                                                                                                                                             | 0.2<br>(0.133–0.283)   |
| Mild dementia due to other chromosomal abnormalities                                                                   | Dementia, mild                                                              | has some trouble remembering recent events, and finds it hard to concentrate and make decisions and plans.                                                                                                                                | 0.069<br>(0.046–0.099) |
| Congenital heart disease and mild dementia due to other chromosomal abnormalities                                      | Congenital heart disease and mild dementia                                  | (combined DW)                                                                                                                                                                                                                             | 0.069<br>(0.046–0.099) |
| Severe motor and cognitive impairment due to Edward Syndrome or Patau Syndrome                                         | Motor plus cognitive impairments, severe                                    | cannot move around without help, and cannot lift or hold objects, get dressed or sit upright. The person also has very low intelligence, speaks few words, and needs constant supervision and help with all daily activities.             | 0.542<br>(0.374–0.702) |
| Mild intellectual disability due to other chromosomal abnormalities                                                    | Intellectual disability / mental retardation, mild                          | has low intelligence and is slow in learning at school. As an adult, the person can live independently, but often needs help to raise children and can only work at simple supervised jobs.                                               | 0.043<br>(0.026–0.064) |
| Moderate dementia due to other chromosomal abnormalities                                                               | Dementia, moderate                                                          | has memory problems and confusion, feels disoriented, at times hears voices that are not real, and needs help with some daily activities.                                                                                                 | 0.377<br>(0.252–0.508) |
| Congenital heart disease and severe dementia due to other chromosomal abnormalities                                    | Congenital heart disease and severe dementia                                | (combined DW)                                                                                                                                                                                                                             | 0.449<br>(0.304–0.595) |
| Moderate intellectual disability due to other chromosomal abnormalities                                                | Intellectual disability / mental retardation, moderate                      | has low intelligence, and is slow in learning to speak and to do even simple tasks. As an adult, the person requires a lot of support to live independently and raise children. The person can only work at the simplest supervised jobs. | 0.1<br>(0.066–0.142)   |
| Mild intellectual disability and moderate dementia due to other chromosomal abnormalities                              | Moderate dementia, mild intellectual disability                             | (combined DW)                                                                                                                                                                                                                             | 0.403<br>(0.281–0.536) |
| Severe intellectual disability, mild dementia, and congenital heart disease due to other chromosomal abnormalities     | Congenital heart disease, mild dementia, severe intellectual disability     | (combined DW)                                                                                                                                                                                                                             | 0.218<br>(0.149–0.299) |
| Severe intellectual disability, severe dementia, and congenital heart disease due to other chromosomal abnormalities   | Congenital heart disease, severe dementia, severe intellectual disability   | (combined DW)                                                                                                                                                                                                                             | 0.535<br>(0.384–0.681) |
| Severe intellectual disability due to other chromosomal abnormalities                                                  | Intellectual disability / mental retardation, severe                        | has very low intelligence and cannot speak more than a few words, needs constant supervision and help with most daily activities, and can do only the simplest tasks.                                                                     | 0.16<br>(0.107–0.226)  |
| Profound intellectual disability, severe dementia, and congenital heart disease due to other chromosomal abnormalities | Congenital heart disease, severe dementia, profound intellectual disability | (combined DW)                                                                                                                                                                                                                             | 0.557<br>(0.401–0.703) |
| Borderline intellectual disability and mild dementia due to other chromosomal abnormalities                            | Mild dementia, borderline intellectual disability                           | (combined DW)                                                                                                                                                                                                                             | 0.079<br>(0.051–0.115) |

**Appendix Table 6. GBD 2016 sequelae, health states, health state lay descriptions, and disability weights**

| Sequela                                                                                                                    | Health state name                                                               | Health state lay description                                                                                                                                                                   | Disability weight      |
|----------------------------------------------------------------------------------------------------------------------------|---------------------------------------------------------------------------------|------------------------------------------------------------------------------------------------------------------------------------------------------------------------------------------------|------------------------|
| Profound intellectual disability and severe dementia due to other chromosomal abnormalities                                | Severe dementia, profound intellectual disability                               | (combined DW)                                                                                                                                                                                  | 0.557<br>(0.401–0.703) |
| Mild intellectual disability and mild dementia due to other chromosomal abnormalities                                      | Mild dementia, mild intellectual disability                                     | (combined DW)                                                                                                                                                                                  | 0.109<br>(0.071–0.159) |
| Severe intellectual disability and severe dementia due to other chromosomal abnormalities                                  | Severe dementia, severe intellectual disability                                 | (combined DW)                                                                                                                                                                                  | 0.535<br>(0.384–0.681) |
| Moderate intellectual disability, mild dementia, and congenital heart disease due to other chromosomal abnormalities       | Congenital heart disease, mild dementia, moderate intellectual disability       | (combined DW)                                                                                                                                                                                  | 0.162<br>(0.11–0.222)  |
| Moderate intellectual disability and severe dementia due to other chromosomal abnormalities                                | Severe dementia, moderate intellectual disability                               | (combined DW)                                                                                                                                                                                  | 0.503<br>(0.355–0.646) |
| Mild intellectual disability and severe dementia due to other chromosomal abnormalities                                    | Severe dementia, mild intellectual disability                                   | (combined DW)                                                                                                                                                                                  | 0.472<br>(0.332–0.615) |
| Borderline intellectual disability and severe dementia due to other chromosomal abnormalities                              | Severe dementia, borderline intellectual disability                             | (combined DW)                                                                                                                                                                                  | 0.455<br>(0.316–0.597) |
| Severe intellectual disability and mild dementia due to other chromosomal abnormalities                                    | Mild dementia, severe intellectual disability                                   | (combined DW)                                                                                                                                                                                  | 0.218<br>(0.149–0.299) |
| Profound intellectual disability and moderate dementia due to other chromosomal abnormalities                              | Moderate dementia, profound intellectual disability                             | (combined DW)                                                                                                                                                                                  | 0.499<br>(0.358–0.645) |
| Severe intellectual disability and moderate dementia due to other chromosomal abnormalities                                | Moderate dementia, severe intellectual disability                               | (combined DW)                                                                                                                                                                                  | 0.475<br>(0.34–0.614)  |
| Profound intellectual disability and mild dementia due to other chromosomal abnormalities                                  | Mild dementia, profound intellectual disability                                 | (combined DW)                                                                                                                                                                                  | 0.255<br>(0.178–0.346) |
| Moderate intellectual disability and moderate dementia due to other chromosomal abnormalities                              | Moderate dementia, moderate intellectual disability                             | (combined DW)                                                                                                                                                                                  | 0.438<br>(0.311–0.576) |
| Moderate intellectual disability and mild dementia due to other chromosomal abnormalities                                  | Mild dementia, moderate intellectual disability                                 | (combined DW)                                                                                                                                                                                  | 0.162<br>(0.11–0.222)  |
| Moderate intellectual disability, severe dementia, and congenital heart disease due to other chromosomal abnormalities     | Congenital heart disease, severe dementia, moderate intellectual disability     | (combined DW)                                                                                                                                                                                  | 0.503<br>(0.355–0.646) |
| Borderline intellectual disability, moderate dementia, and congenital heart disease due to other chromosomal abnormalities | Congenital heart disease, moderate dementia, borderline intellectual disability | (combined DW)                                                                                                                                                                                  | 0.384<br>(0.262–0.517) |
| Profound intellectual disability, mild dementia, and congenital heart disease due to other chromosomal abnormalities       | Congenital heart disease, mild dementia, profound intellectual disability       | (combined DW)                                                                                                                                                                                  | 0.255<br>(0.178–0.346) |
| Borderline intellectual disability and moderate dementia due to other chromosomal abnormalities                            | Moderate dementia, borderline intellectual disability                           | (combined DW)                                                                                                                                                                                  | 0.384<br>(0.262–0.517) |
| Mild intellectual disability, moderate dementia, and congenital heart disease due to other chromosomal abnormalities       | Congenital heart disease, moderate dementia, mild intellectual disability       | (combined DW)                                                                                                                                                                                  | 0.403<br>(0.281–0.536) |
| Moderate intellectual disability, moderate dementia, and congenital heart disease due to other chromosomal abnormalities   | Congenital heart disease, moderate dementia, moderate intellectual disability   | (combined DW)                                                                                                                                                                                  | 0.438<br>(0.311–0.576) |
| Severe intellectual disability, moderate dementia, and congenital heart disease due to other chromosomal abnormalities     | Congenital heart disease, moderate dementia, severe intellectual disability     | (combined DW)                                                                                                                                                                                  | 0.475<br>(0.34–0.614)  |
| Severe motor and cognitive impairment with congenital heart disease due to Edward Syndrome or Patau Syndrome               | Severe motor plus cognitive impairments and congenital heart disease            | (combined DW)                                                                                                                                                                                  | 0.542<br>(0.374–0.702) |
| Profound intellectual disability, moderate dementia, and congenital heart disease due to other chromosomal abnormalities   | Congenital heart disease, moderate dementia, profound intellectual disability   | (combined DW)                                                                                                                                                                                  | 0.499<br>(0.358–0.645) |
| Borderline intellectual disability, severe dementia, and congenital heart disease due to other chromosomal abnormalities   | Congenital heart disease, severe dementia, borderline intellectual disability   | (combined DW)                                                                                                                                                                                  | 0.455<br>(0.316–0.597) |
| Mild intellectual disability, severe dementia, and congenital heart disease due to other chromosomal abnormalities         | Congenital heart disease, severe dementia, mild intellectual disability         | (combined DW)                                                                                                                                                                                  | 0.472<br>(0.332–0.615) |
| Profound intellectual disability due to other chromosomal abnormalities                                                    | Intellectual disability / mental retardation, profound                          | has very low intelligence, has almost no language, and does not understand even the most basic requests or instructions. The person requires constant supervision and help for all activities. | 0.2<br>(0.133–0.283)   |
| Disfigurement level 2 with pain due to other congenital musculoskeletal anomalies                                          | Disfigurement, level 2, with itch/pain                                          | has a visible physical deformity that is sore and itchy. Other people stare and comment, which causes the person to worry. The person has trouble sleeping and concentrating.                  | 0.188<br>(0.125–0.267) |
| Disfigurement level 2 and mild motor impairment due to congenital limb deficiency                                          | Level 2 disfigurement with mild motor impairment                                | (combined DW)                                                                                                                                                                                  | 0.076<br>(0.051–0.112) |
| Disfigurement level 1 due to polydactyly and syndactyly                                                                    | Disfigurement, level 1                                                          | has a slight, visible physical deformity that others notice, which causes some worry and discomfort.                                                                                           | 0.011<br>(0.005–0.021) |
| Disfigurement level 2 and moderate motor impairment due to other congenital musculoskeletal anomalies                      | Level 2 disfigurement with moderate motor impairment                            | (combined DW)                                                                                                                                                                                  | 0.124<br>(0.083–0.175) |
| Disfigurement level 2 with pain due to congenital limb deficiency                                                          | Disfigurement, level 2, with itch/pain                                          | has a visible physical deformity that is sore and itchy. Other people stare and comment, which causes the person to worry. The person has trouble sleeping and concentrating.                  | 0.188<br>(0.125–0.267) |
| Disfigurement level 2 due to other congenital musculoskeletal anomalies                                                    | Disfigurement, level 2                                                          | has a visible physical deformity that causes others to stare and comment. As a result, the person is worried and has trouble sleeping and concentrating.                                       | 0.067<br>(0.044–0.096) |
| Disfigurement level 2 due to congenital limb deficiency                                                                    | Disfigurement, level 2                                                          | has a visible physical deformity that causes others to stare and comment. As a result, the person is worried and has trouble sleeping and concentrating.                                       | 0.067<br>(0.044–0.096) |
| Disfigurement level 2 with pain and moderate motor impairment due to other congenital musculoskeletal anomalies            | Level 2 disfigurement with itch/pain and moderate motor impairment              | (combined DW)                                                                                                                                                                                  | 0.237<br>(0.163–0.324) |
| Disfigurement level 2 with pain and mild motor impairment due to other congenital musculoskeletal anomalies                | Level 2 disfigurement with itch/pain and mild motor impairment                  | (combined DW)                                                                                                                                                                                  | 0.196<br>(0.132–0.275) |
| Disfigurement level 2 with pain and mild motor impairment due to congenital limb deficiency                                | Level 2 disfigurement with itch/pain and mild motor impairment                  | (combined DW)                                                                                                                                                                                  | 0.196<br>(0.132–0.275) |
| Disfigurement level 2 and mild motor impairment due to other congenital musculoskeletal anomalies                          | Level 2 disfigurement with mild motor impairment                                | (combined DW)                                                                                                                                                                                  | 0.076<br>(0.051–0.112) |
| Disfigurement level 2 with pain and moderate motor impairment due to congenital limb deficiency                            | Level 2 disfigurement with itch/pain and moderate motor impairment              | (combined DW)                                                                                                                                                                                  | 0.237<br>(0.163–0.324) |

| Appendix Table 6. GBD 2016 sequelae, health states, health state lay descriptions, and disability weights                                                                    |                                                                                         |                                                                                                                                                                                             |                        |
|------------------------------------------------------------------------------------------------------------------------------------------------------------------------------|-----------------------------------------------------------------------------------------|---------------------------------------------------------------------------------------------------------------------------------------------------------------------------------------------|------------------------|
| Sequela                                                                                                                                                                      | Health state name                                                                       | Health state lay description                                                                                                                                                                | Disability weight      |
| Disfigurement level 2 and moderate motor impairment due to congenital limb deficiency                                                                                        | Level 2 disfigurement with moderate motor impairment                                    | (combined DW)                                                                                                                                                                               | 0.124<br>(0.083–0.175) |
| Incontinence and impotence due to congenital anomalies of the urinary tract                                                                                                  | urinary incontinence and impotence                                                      | (combined DW)                                                                                                                                                                               | 0.154<br>(0.105–0.214) |
| Atypical genitalia, recurrent urinary tract infections or other abdominal issues and incontinence due to congenital anomalies of the urinary tract                           | Mild abdominopelvic problem, urinary incontinence, and level 1 disfigurement            | (combined DW)                                                                                                                                                                               | 0.158<br>(0.108–0.218) |
| Atypical genitalia due to congenital genital anomalies                                                                                                                       | Disfigurement, level 1                                                                  | has a slight, visible physical deformity that others notice, which causes some worry and discomfort.                                                                                        | 0.011<br>(0.005–0.021) |
| Atypical genitalia, incontinence and impotence due to congenital anomalies of the urinary tract                                                                              | Mild abdominopelvic problem, urinary incontinence, and level 1 disfigurement            | (combined DW)                                                                                                                                                                               | 0.158<br>(0.108–0.218) |
| Atypical genitalia due to congenital anomalies of the urinary tract                                                                                                          | Disfigurement, level 1                                                                  | has a slight, visible physical deformity that others notice, which causes some worry and discomfort.                                                                                        | 0.011<br>(0.005–0.021) |
| Recurrent urinary tract infections or other abdominal issues due to congenital anomalies of the urinary tract                                                                | Abdominopelvic problem, mild                                                            | has some pain in the belly that causes nausea but does not interfere with daily activities.                                                                                                 | 0.011<br>(0.005–0.021) |
| Incontinence, impotence, and recurrent urinary tract infections or other abdominal issues due to congenital anomalies of the urinary tract                                   | Mild abdominopelvic problem, urinary incontinence, and impotence                        | (combined DW)                                                                                                                                                                               | 0.163<br>(0.112–0.225) |
| Recurrent urinary tract infections or other abdominal issues due to congenital genital anomalies                                                                             | Abdominopelvic problem, mild                                                            | has some pain in the belly that causes nausea but does not interfere with daily activities.                                                                                                 | 0.011<br>(0.005–0.021) |
| Incontinence and recurrent urinary tract infections or other abdominal issues due to congenital anomalies of the urinary tract                                               | Level 1 disfigurement and urinary incontinence                                          | (combined DW)                                                                                                                                                                               | 0.149<br>(0.101–0.206) |
| Atypical genitalia, incontinence, impotence, and recurrent urinary tract infections or other abdominal issues and impotence due to congenital anomalies of the urinary tract | Mild abdominopelvic problem, urinary incontinence, impotence, and level 1 disfigurement | (combined DW)                                                                                                                                                                               | 0.172<br>(0.118–0.239) |
| Primary infertility and recurrent urinary tract infections or other abdominal issues due to congenital genital anomalies                                                     | Mild abdominal pain and primary infertility                                             | (combined DW)                                                                                                                                                                               | --                     |
| Asymptomatic congenital genital anomalies                                                                                                                                    | Asymptomatic                                                                            | --                                                                                                                                                                                          | --                     |
| Impotence due to congenital anomalies of the urinary tract                                                                                                                   | Impotence                                                                               | has difficulty in obtaining or maintaining an erection.                                                                                                                                     | 0.017<br>(0.009–0.03)  |
| Impotence due to congenital genital anomalies                                                                                                                                | Impotence                                                                               | has difficulty in obtaining or maintaining an erection.                                                                                                                                     | 0.017<br>(0.009–0.03)  |
| Incontinence due to congenital anomalies of the urinary tract                                                                                                                | Urinary incontinence                                                                    | cannot control urinating.                                                                                                                                                                   | 0.139<br>(0.094–0.198) |
| Asymptomatic congenital anomalies of the urinary tract                                                                                                                       | Asymptomatic                                                                            | --                                                                                                                                                                                          | --                     |
| Atypical genitalia, infertility, impotence, and recurrent urinary tract infections or other abdominal issues and impotence due to congenital genital anomalies               | Mild abdominopelvic problem, primary infertility, impotence, and level 1 disfigurement  | (combined DW)                                                                                                                                                                               | 0.046<br>(0.023–0.083) |
| Infertility, impotence, and recurrent urinary tract infections or other abdominal issues and impotence due to congenital genital anomalies                                   | Mild abdominopelvic problem, primary infertility, and impotence                         | (combined DW)                                                                                                                                                                               | 0.035<br>(0.018–0.064) |
| Impotence and recurrent urinary tract infections or other abdominal issues due to congenital genital anomalies                                                               | Mild abdominopelvic problem and impotence                                               | (combined DW)                                                                                                                                                                               | 0.028<br>(0.014–0.05)  |
| Impotence and recurrent urinary tract infections or other abdominal issues due to congenital anomalies of the urinary tract                                                  | Mild abdominopelvic problem and impotence                                               | (combined DW)                                                                                                                                                                               | 0.028<br>(0.014–0.05)  |
| Primary infertility due to congenital genital anomalies                                                                                                                      | Infertility, primary                                                                    | wants to have a child and has a fertile partner, but the couple cannot conceive.                                                                                                            | 0.008<br>(0.003–0.015) |
| Atypical genitalia, recurrent urinary tract infections or other abdominal issues and infertility due to congenital genital anomalies                                         | Mild abdominopelvic problem, level 1 disfigurement and primary infertility              | (combined DW)                                                                                                                                                                               | 0.029<br>(0.014–0.055) |
| Atypical genitalia, infertility and impotence due to congenital genital anomalies                                                                                            | Mild abdominopelvic problem, level 1 disfigurement and primary infertility              | (combined DW)                                                                                                                                                                               | 0.029<br>(0.014–0.055) |
| Atypical genitalia and primary infertility due to congenital genital anomalies                                                                                               | Disfigurement level 1 and primary infertility                                           | (combined DW)                                                                                                                                                                               | --                     |
| Atypical genitalia and impotence due to congenital anomalies of the urinary tract                                                                                            | Level 1 disfigurement and impotence                                                     | (combined DW)                                                                                                                                                                               | 0.028<br>(0.014–0.05)  |
| Atypical genitalia, recurrent urinary tract infections or other abdominal issues and impotence due to congenital genital anomalies                                           | Mild abdominopelvic problem, level 1 disfigurement and impotence                        | (combined DW)                                                                                                                                                                               | 0.039<br>(0.02–0.07)   |
| Atypical genitalia, recurrent urinary tract infections or other abdominal issues and impotence due to congenital anomalies of the urinary tract                              | Mild abdominopelvic problem, level 1 disfigurement and impotence                        | (combined DW)                                                                                                                                                                               | 0.039<br>(0.02–0.07)   |
| Infertility and impotence due to congenital genital anomalies                                                                                                                | Primary infertility and impotence                                                       | (combined DW)                                                                                                                                                                               | 0.025<br>(0.012–0.045) |
| Atypical genital and recurrent urinary tract infections and other abdominal issues due to congenital genital anomalies                                                       | Mild abdominopelvic problem and level 1 disfigurement                                   | (combined DW)                                                                                                                                                                               | 0.022<br>(0.011–0.041) |
| Atypical genital and recurrent urinary tract infections and other abdominal issues due to congenital anomalies of the urinary tract                                          | Mild abdominopelvic problem and level 1 disfigurement                                   | (combined DW)                                                                                                                                                                               | 0.022<br>(0.011–0.041) |
| Atypical genitalia and incontinence due to congenital anomalies of the urinary tract                                                                                         | Mild abdominopelvic problem and level 1 disfigurement                                   | (combined DW)                                                                                                                                                                               | 0.022<br>(0.011–0.041) |
| Atypical genitalia and impotence due to congenital genital anomalies                                                                                                         | Level 1 disfigurement and impotence                                                     | (combined DW)                                                                                                                                                                               | 0.028<br>(0.014–0.05)  |
| Chronic abdominal pain and mild chronic respiratory problems due to congenital diaphragmatic hernia                                                                          | Mild abdominopelvic problem and mild COPD and other chronic respiratory problems        | (combined DW)                                                                                                                                                                               | 0.03<br>(0.016–0.053)  |
| Chronic abdominal pain and disfigurement due to congenital diaphragmatic hernia                                                                                              | Level 1 disfigurement with itch/pain and mild abdominopelvic problem                    | (combined DW)                                                                                                                                                                               | 0.037<br>(0.02–0.062)  |
| Disfigurement from scars following treatment for congenital malformations of the abdominal wall                                                                              | Disfigurement, level 1                                                                  | has a slight, visible physical deformity that others notice, which causes some worry and discomfort.                                                                                        | 0.011<br>(0.005–0.021) |
| Chronic abdominal pain due to congenital atresia and/or stenosis of the digestive tract                                                                                      | Abdominopelvic problem, moderate                                                        | has pain in the belly and feels nauseous. The person has difficulties with daily activities.                                                                                                | 0.114<br>(0.078–0.159) |
| Developmental delay or mild intellectual disability due to congenital diaphragmatic hernia                                                                                   | Intellectual disability / mental retardation, mild                                      | has low intelligence and is slow in learning at school. As an adult, the person can live independently, but often needs help to raise children and can only work at simple supervised jobs. | 0.043<br>(0.026–0.064) |

| Appendix Table 6. GBD 2016 sequelae, health states, health state lay descriptions, and disability weights                                                   |                                                                                                                                        |                                                                                                                                                                                                                                                                                               |                        |
|-------------------------------------------------------------------------------------------------------------------------------------------------------------|----------------------------------------------------------------------------------------------------------------------------------------|-----------------------------------------------------------------------------------------------------------------------------------------------------------------------------------------------------------------------------------------------------------------------------------------------|------------------------|
| Sequela                                                                                                                                                     | Health state name                                                                                                                      | Health state lay description                                                                                                                                                                                                                                                                  | Disability weight      |
| Chronic abdominal pain and/or nausea due to other congenital malformations of the digestive tract                                                           | Abdominopelvic problem, moderate                                                                                                       | has pain in the belly and feels nauseous. The person has difficulties with daily activities.                                                                                                                                                                                                  | 0.114<br>(0.078–0.159) |
| Chronic abdominal pain and/or nausea with acid reflux, dysphagia, and/or constipation due to other congenital malformations of the digestive tract          | Mild abdominopelvic problem and moderate abdominopelvic problem                                                                        | (combined DW)                                                                                                                                                                                                                                                                                 | 0.124<br>(0.085–0.171) |
| Disfigurement due to congenital diaphragmatic hernia                                                                                                        | Disfigurement, level 1                                                                                                                 | has a slight, visible physical deformity that others notice, which causes some worry and discomfort.                                                                                                                                                                                          | 0.011<br>(0.005–0.021) |
| Constipation due to congenital malformations of the abdominal wall                                                                                          | Abdominopelvic problem, moderate                                                                                                       | has pain in the belly and feels nauseous. The person has difficulties with daily activities.                                                                                                                                                                                                  | 0.114<br>(0.078–0.159) |
| Chronic respiratory problems including difficulty breaking and recurrent upper respiratory infections due to atresia and/or stenosis of the digestive tract | COPD and other chronic respiratory problems, mild                                                                                      | has cough and shortness of breath after heavy physical activity, but is able to walk long distances and climb stairs.                                                                                                                                                                         | 0.019<br>(0.011–0.033) |
| Constipation and chronic abdominal pain due to congenital malformations of the abdominal wall                                                               | Mild abdominopelvic problem and moderate abdominopelvic problem                                                                        | (combined DW)                                                                                                                                                                                                                                                                                 | 0.124<br>(0.085–0.171) |
| Asymptomatic congenital diaphragmatic hernia                                                                                                                | Asymptomatic                                                                                                                           | --                                                                                                                                                                                                                                                                                            | --                     |
| Asymptomatic congenital atresia and/or stenosis of the digestive tract                                                                                      | Asymptomatic                                                                                                                           | --                                                                                                                                                                                                                                                                                            | --                     |
| Asymptomatic congenital malformations of the abdominal wall after treatment                                                                                 | Asymptomatic                                                                                                                           | --                                                                                                                                                                                                                                                                                            | --                     |
| Asymptomatic other congenital malformations of the digestive tract                                                                                          | Asymptomatic                                                                                                                           | --                                                                                                                                                                                                                                                                                            | --                     |
| Chronic respiratory problems and dysphagia or acid reflux due to congenital atresia and/or stenosis of the digestive tract                                  | Mild abdominopelvic problem and mild COPD and other chronic respiratory problems                                                       | (combined DW)                                                                                                                                                                                                                                                                                 | 0.03<br>(0.016–0.053)  |
| Acid reflux, dysphagia, and/or constipation due to other congenital malformations of the digestive tract                                                    | Abdominopelvic problem, mild                                                                                                           | has some pain in the belly that causes nausea but does not interfere with daily activities.                                                                                                                                                                                                   | 0.011<br>(0.005–0.021) |
| Chronic abdominal pain due to congenital malformations of the abdominal wall                                                                                | Abdominopelvic problem, mild                                                                                                           | has some pain in the belly that causes nausea but does not interfere with daily activities.                                                                                                                                                                                                   | 0.011<br>(0.005–0.021) |
| Dysphagia or acid reflux due to congenital atresia and/or stenosis of the digestive tract                                                                   | Abdominopelvic problem, mild                                                                                                           | has some pain in the belly that causes nausea but does not interfere with daily activities.                                                                                                                                                                                                   | 0.011<br>(0.005–0.021) |
| Chronic abdominal pain due to congenital diaphragmatic hernia                                                                                               | Abdominopelvic problem, mild                                                                                                           | has some pain in the belly that causes nausea but does not interfere with daily activities.                                                                                                                                                                                                   | 0.011<br>(0.005–0.021) |
| Mild chronic respiratory problems and breathlessness due to congenital diaphragmatic hernia                                                                 | COPD and other chronic respiratory problems, mild                                                                                      | has cough and shortness of breath after heavy physical activity, but is able to walk long distances and climb stairs.                                                                                                                                                                         | 0.019<br>(0.011–0.033) |
| Chronic respiratory problems and abdominal pain due to congenital atresia and/or stenosis of the digestive tract                                            | Mild abdominopelvic problem and mild COPD and other chronic respiratory problems                                                       | (combined DW)                                                                                                                                                                                                                                                                                 | 0.03<br>(0.016–0.053)  |
| Dysphagia or acid reflux and chronic abdominal pain due to congenital atresia and/or stenosis of the digestive tract                                        | Mild abdominopelvic problem and moderate abdominopelvic problem                                                                        | (combined DW)                                                                                                                                                                                                                                                                                 | 0.124<br>(0.085–0.171) |
| Chronic abdominal pain and developmental delay due to congenital diaphragmatic hernia                                                                       | Mild abdominopelvic problem and mild intellectual disability                                                                           | (combined DW)                                                                                                                                                                                                                                                                                 | 0.053<br>(0.032–0.083) |
| Constipation and concern about scars due to congenital malformations of the abdominal wall                                                                  | Mild abdominopelvic problem and level 1 disfigurement                                                                                  | (combined DW)                                                                                                                                                                                                                                                                                 | 0.022<br>(0.011–0.041) |
| Disfigurement and mild chronic respiratory problems due to congenital diaphragmatic hernia                                                                  | Level 1 disfigurement with itch/pain and mild COPD and other chronic respiratory problems                                              | (combined DW)                                                                                                                                                                                                                                                                                 | 0.045<br>(0.026–0.073) |
| Chronic abdominal pain, disfigurement, developmental delay and chronic respiratory problems due to congenital diaphragmatic hernia                          | Mild abdominopelvic problem, mild COPD and other chronic respiratory problems, mild intellectual disability, and level 1 disfigurement | (combined DW)                                                                                                                                                                                                                                                                                 | 0.096<br>(0.057–0.148) |
| Disfigurement, chronic respiratory problems and developmental delay due to congenital diaphragmatic hernia                                                  | Mild COPD and other chronic respiratory problems, mild intellectual disability, and level 1 disfigurement with itch/pain               | (combined DW)                                                                                                                                                                                                                                                                                 | 0.086<br>(0.052–0.131) |
| Chronic abdominal pain, disfigurement and developmental delay due to congenital diaphragmatic hernia                                                        | Mild abdominopelvic problem, mild intellectual disability, and level 1 disfigurement with itch/pain                                    | (combined DW)                                                                                                                                                                                                                                                                                 | 0.078<br>(0.046–0.12)  |
| Chronic abdominal pain, chronic respiratory problems and developmental delay due to congenital diaphragmatic hernia                                         | Mild abdominopelvic problem, mild COPD and other chronic respiratory problems, and level 1 disfigurement with itch/pain                | (combined DW)                                                                                                                                                                                                                                                                                 | 0.056<br>(0.031–0.092) |
| Chronic abdominal pain and concern about scars due to congenital malformations of the abdominal wall                                                        | Moderate abdominopelvic problem and level 1 disfigurement                                                                              | (combined DW)                                                                                                                                                                                                                                                                                 | 0.124<br>(0.085–0.172) |
| Chronic abdominal pain, disfigurement and chronic respiratory problems due to congenital diaphragmatic hernia                                               | Mild abdominopelvic problem, mild COPD and other chronic respiratory problems, and level 1 disfigurement with itch/pain                | (combined DW)                                                                                                                                                                                                                                                                                 | 0.056<br>(0.031–0.092) |
| Constipation, chronic abdominal pain and concern about scars due to congenital malformations of the abdominal wall                                          | Mild abdominopelvic problem, moderate abdominopelvic problem, and level 1 disfigurement                                                | (combined DW)                                                                                                                                                                                                                                                                                 | 0.206<br>(0.143–0.283) |
| Dysphagia or acid reflux, chronic abdominal pain and chronic respiratory problems due to congenital atresia and/or stenosis of the digestive tract          | Mild abdominopelvic problem, moderate abdominopelvic problem, and mild COPD and other chronic respiratory problems                     | (combined DW)                                                                                                                                                                                                                                                                                 | 0.141<br>(0.096–0.198) |
| Disfigurement and developmental delay due to congenital diaphragmatic hernia                                                                                | Level 1 disfigurement with itch/pain and mild intellectual disability                                                                  | (combined DW)                                                                                                                                                                                                                                                                                 | 0.068<br>(0.041–0.102) |
| Mild chronic respiratory problems and developmental delay due to congenital diaphragmatic hernia                                                            | Mild intellectual disability and mild COPD and other chronic respiratory problem                                                       | (combined DW)                                                                                                                                                                                                                                                                                 | 0.061<br>(0.037–0.093) |
| Moderate hearing loss with ringing due to other congenital anomalies                                                                                        | Hearing loss, moderate, with ringing                                                                                                   | is unable to hear and understand another person talking in a noisy place (for example, on an urban street), and has difficulty hearing another person talking even in a quiet place or on the phone, and has annoying ringing in the ears for more than 5 minutes at a time, almost everyday. | 0.074<br>(0.049–0.107) |
| Moderately severe hearing loss due to other congenital anomalies                                                                                            | Hearing loss, moderately severe                                                                                                        | (custom DW from hearing loss impairment envelope)                                                                                                                                                                                                                                             | --                     |
| Mild hearing loss with ringing due to other congenital anomalies                                                                                            | Hearing loss, mild, with ringing                                                                                                       | has great difficulty hearing and understanding another person talking in a noisy place (for example, on an urban street), and sometimes has annoying ringing in the ears.                                                                                                                     | 0.021<br>(0.012–0.036) |



**Appendix Table 6. GBD 2016 sequelae, health states, health state lay descriptions, and disability weights**

| Sequela                                                                       | Health state name                                                  | Health state lay description                                                                                                                                                                                                                                                                                                                                                                   | Disability weight      |
|-------------------------------------------------------------------------------|--------------------------------------------------------------------|------------------------------------------------------------------------------------------------------------------------------------------------------------------------------------------------------------------------------------------------------------------------------------------------------------------------------------------------------------------------------------------------|------------------------|
| Severe hearing loss due to other congenital anomalies                         | Hearing loss, severe                                               | is unable to hear and understand another person talking, even in a quiet place, and unable to take part in a phone conversation. Difficulties with communicating and relating to others cause emotional impact at times (for example worry or depression).                                                                                                                                     | 0.158<br>(0.105–0.227) |
| Moderate hearing loss due to other congenital anomalies                       | Hearing loss, moderate                                             | is unable to hear and understand another person talking in a noisy place (for example, on an urban street), and has difficulty hearing another person talking even in a quiet place or on the phone.                                                                                                                                                                                           | 0.027<br>(0.015–0.042) |
| Severe hearing loss with ringing due to other congenital anomalies            | Hearing loss, severe, with ringing                                 | is unable to hear and understand another person talking, even in a quiet place, and unable to take part in a phone conversation, and has annoying ringing in the ears for more than 5 minutes at a time, almost everyday. Difficulties with communicating and relating to others cause emotional impact at times (for example worry or depression).                                            | 0.261<br>(0.175–0.36)  |
| Mild hearing loss due to other congenital anomalies                           | Hearing loss, mild                                                 | has great difficulty hearing and understanding another person talking in a noisy place (for example, on an urban street).                                                                                                                                                                                                                                                                      | 0.01<br>(0.004–0.019)  |
| Complete hearing loss with ringing due to other congenital anomalies          | Hearing loss, complete, with ringing                               | cannot hear at all in any situation, including even the loudest sounds, and cannot communicate verbally or use a phone, and has very annoying ringing in the ears for more than half of the day. Difficulties with communicating and relating to others often cause worry, depression or loneliness.                                                                                           | 0.316<br>(0.212–0.435) |
| Complete hearing loss due to other congenital anomalies                       | Hearing loss, complete                                             | cannot hear at all in any situation, including even the loudest sounds, and cannot communicate verbally or use a phone. Difficulties with communicating and relating to others often cause worry, depression or loneliness.                                                                                                                                                                    | 0.215<br>(0.144–0.307) |
| Profound hearing loss due to other congenital anomalies                       | Hearing loss, profound                                             | is unable to hear and understand another person talking, even in a quiet place, is unable to take part in a phone conversation, and has great difficulty hearing anything in any other situation. Difficulties with communicating and relating to others often cause worry, depression, and loneliness.                                                                                        | 0.204<br>(0.134–0.288) |
| Moderately severe hearing loss with ringing due to other congenital anomalies | Hearing loss, moderately severe, with ringing                      | (custom DW from hearing loss impairment envelope)                                                                                                                                                                                                                                                                                                                                              | --                     |
| Other congenital birth defects                                                | Post-COMO calculation for residuals (YLL/YLD ratio, other methods) | --                                                                                                                                                                                                                                                                                                                                                                                             | --                     |
| Profound hearing loss with ringing due to other congenital anomalies          | Hearing loss, profound, with ringing                               | is unable to hear and understand another person talking, even in a quiet place, is unable to take part in a phone conversation, has great difficulty hearing anything in any other situation, and has annoying ringing in the ears for more than 5 minutes at a time, several times a day. Difficulties with communicating and relating to others often cause worry, depression or loneliness. | 0.277<br>(0.182–0.387) |
| Symptomatic seborrheic dermatitis                                             | Disfigurement, level 1 with itch/pain                              | has a slight, visible physical deformity that is sometimes sore or itchy. Others notice the deformity, which causes some worry and discomfort.                                                                                                                                                                                                                                                 | 0.027<br>(0.015–0.042) |
| Asymptomatic contact dermatitis                                               | Asymptomatic                                                       | --                                                                                                                                                                                                                                                                                                                                                                                             | --                     |
| Asymptomatic seborrheic dermatitis                                            | Asymptomatic                                                       | --                                                                                                                                                                                                                                                                                                                                                                                             | --                     |
| Severe atopic dermatitis                                                      | Disfigurement, level 3, with itch/pain                             | has an obvious physical deformity that is very painful and itchy. The physical deformity makes others uncomfortable, which causes the person to avoid social contact, feel worried, sleep poorly, and think about suicide.                                                                                                                                                                     | 0.576<br>(0.401–0.731) |
| Mild contact dermatitis                                                       | Disfigurement, level 1 with itch/pain                              | has a slight, visible physical deformity that is sometimes sore or itchy. Others notice the deformity, which causes some worry and discomfort.                                                                                                                                                                                                                                                 | 0.027<br>(0.015–0.042) |
| Moderate contact dermatitis                                                   | Disfigurement, level 2, with itch/pain                             | has a visible physical deformity that is sore and itchy. Other people stare and comment, which causes the person to worry. The person has trouble sleeping and concentrating.                                                                                                                                                                                                                  | 0.188<br>(0.125–0.267) |
| Mild atopic dermatitis                                                        | Disfigurement, level 1 with itch/pain                              | has a slight, visible physical deformity that is sometimes sore or itchy. Others notice the deformity, which causes some worry and discomfort.                                                                                                                                                                                                                                                 | 0.027<br>(0.015–0.042) |
| Moderate atopic dermatitis                                                    | Disfigurement, level 2, with itch/pain                             | has a visible physical deformity that is sore and itchy. Other people stare and comment, which causes the person to worry. The person has trouble sleeping and concentrating.                                                                                                                                                                                                                  | 0.188<br>(0.125–0.267) |
| Mild psoriasis                                                                | Disfigurement, level 1 with itch/pain                              | has a slight, visible physical deformity that is sometimes sore or itchy. Others notice the deformity, which causes some worry and discomfort.                                                                                                                                                                                                                                                 | 0.027<br>(0.015–0.042) |
| Moderate psoriasis                                                            | Disfigurement, level 2, with itch/pain                             | has a visible physical deformity that is sore and itchy. Other people stare and comment, which causes the person to worry. The person has trouble sleeping and concentrating.                                                                                                                                                                                                                  | 0.188<br>(0.125–0.267) |
| Severe psoriasis                                                              | Disfigurement, level 3, with itch/pain                             | has an obvious physical deformity that is very painful and itchy. The physical deformity makes others uncomfortable, which causes the person to avoid social contact, feel worried, sleep poorly, and think about suicide.                                                                                                                                                                     | 0.576<br>(0.401–0.731) |
| Moderate cellulitis                                                           | Infectious disease, acute episode, moderate                        | has a fever and aches, and feels weak, which causes some difficulty with daily activities.                                                                                                                                                                                                                                                                                                     | 0.051<br>(0.032–0.074) |
| Mild cellulitis                                                               | Infectious disease, acute episode, mild                            | has a low fever and mild discomfort, but no difficulty with daily activities.                                                                                                                                                                                                                                                                                                                  | 0.006<br>(0.002–0.012) |
| Severe cellulitis                                                             | Infectious disease, acute episode, severe                          | has a high fever and pain, and feels very weak, which causes great difficulty with daily activities.                                                                                                                                                                                                                                                                                           | 0.133<br>(0.088–0.19)  |

**Appendix Table 6. GBD 2016 sequelae, health states, health state lay descriptions, and disability weights**

| Sequela                                                | Health state name                       | Health state lay description                                                                                                                                                                                               | Disability weight      |
|--------------------------------------------------------|-----------------------------------------|----------------------------------------------------------------------------------------------------------------------------------------------------------------------------------------------------------------------------|------------------------|
| Abscess and other bacterial skin diseases              | Infectious disease, acute episode, mild | has a low fever and mild discomfort , but no difficulty with daily activities.                                                                                                                                             | 0.006<br>(0.002–0.012) |
| Impetigo                                               | Infectious disease, acute episode, mild | has a low fever and mild discomfort , but no difficulty with daily activities.                                                                                                                                             | 0.006<br>(0.002–0.012) |
| Scabies                                                | Disfigurement, level 1 with itch/pain   | has a slight, visible physical deformity that is sometimes sore or itchy. Others notice the deformity, which causes some worry and discomfort.                                                                             | 0.027<br>(0.015–0.042) |
| Other fungal skin diseases                             | Infectious disease, acute episode, mild | has a low fever and mild discomfort , but no difficulty with daily activities.                                                                                                                                             | 0.006<br>(0.002–0.012) |
| Tinea capitis                                          | Infectious disease, acute episode, mild | has a low fever and mild discomfort , but no difficulty with daily activities.                                                                                                                                             | 0.006<br>(0.002–0.012) |
| Mild viral warts                                       | Infectious disease, acute episode, mild | has a low fever and mild discomfort , but no difficulty with daily activities.                                                                                                                                             | 0.006<br>(0.002–0.012) |
| Severe molluscum contagiosum                           | Disfigurement, level 2                  | has a visible physical deformity that causes others to stare and comment. As a result, the person is worried and has trouble sleeping and concentrating.                                                                   | 0.067<br>(0.044–0.096) |
| Severe viral warts                                     | Disfigurement, level 2                  | has a visible physical deformity that causes others to stare and comment. As a result, the person is worried and has trouble sleeping and concentrating.                                                                   | 0.067<br>(0.044–0.096) |
| Mild molluscum contagiosum                             | Infectious disease, acute episode, mild | has a low fever and mild discomfort , but no difficulty with daily activities.                                                                                                                                             | 0.006<br>(0.002–0.012) |
| Mild acne vulgaris                                     | Disfigurement, level 1                  | has a slight, visible physical deformity that others notice, which causes some worry and discomfort.                                                                                                                       | 0.011<br>(0.005–0.021) |
| Moderate acne vulgaris                                 | Disfigurement, level 2                  | has a visible physical deformity that causes others to stare and comment. As a result, the person is worried and has trouble sleeping and concentrating.                                                                   | 0.067<br>(0.044–0.096) |
| Severe acne vulgaris                                   | Disfigurement, level 3                  | has an obvious physical deformity that makes others uncomfortable, which causes the person to avoid social contact, feel worried, sleep poorly, and think about suicide.                                                   | 0.405<br>(0.275–0.546) |
| Severe alopecia areata                                 | Disfigurement, level 2                  | has a visible physical deformity that causes others to stare and comment. As a result, the person is worried and has trouble sleeping and concentrating.                                                                   | 0.067<br>(0.044–0.096) |
| Mild alopecia areata                                   | Disfigurement, level 1                  | has a slight, visible physical deformity that others notice, which causes some worry and discomfort.                                                                                                                       | 0.011<br>(0.005–0.021) |
| Pruritus                                               | Disfigurement, level 1                  | has a slight, visible physical deformity that others notice, which causes some worry and discomfort.                                                                                                                       | 0.011<br>(0.005–0.021) |
| Severe urticaria                                       | Disfigurement, level 2, with itch/pain  | has a visible physical deformity that is sore and itchy. Other people stare and comment, which causes the person to worry. The person has trouble sleeping and concentrating.                                              | 0.188<br>(0.125–0.267) |
| Mild urticaria                                         | Disfigurement, level 1 with itch/pain   | has a slight, visible physical deformity that is sometimes sore or itchy. Others notice the deformity, which causes some worry and discomfort.                                                                             | 0.027<br>(0.015–0.042) |
| Moderate decubitus ulcer                               | Disfigurement, level 2, with itch/pain  | has a visible physical deformity that is sore and itchy. Other people stare and comment, which causes the person to worry. The person has trouble sleeping and concentrating.                                              | 0.188<br>(0.125–0.267) |
| Severe decubitus ulcer                                 | Disfigurement, level 3, with itch/pain  | has an obvious physical deformity that is very painful and itchy. The physical deformity makes others uncomfortable, which causes the person to avoid social contact, feel worried, sleep poorly, and think about suicide. | 0.576<br>(0.401–0.731) |
| Mild decubitus ulcer                                   | Disfigurement, level 1 with itch/pain   | has a slight, visible physical deformity that is sometimes sore or itchy. Others notice the deformity, which causes some worry and discomfort.                                                                             | 0.027<br>(0.015–0.042) |
| Symptomatic other skin and subcutaneous diseases       | Disfigurement, level 1                  | has a slight, visible physical deformity that others notice, which causes some worry and discomfort.                                                                                                                       | 0.011<br>(0.005–0.021) |
| Asymptomatic other skin and subcutaneous diseases      | Asymptomatic                            | --                                                                                                                                                                                                                         | --                     |
| Blindness due to glaucoma                              | Distance vision blindness               | is completely blind, which causes great difficulty in some daily activities, worry and anxiety, and great difficulty going outside the home without assistance.                                                            | 0.187<br>(0.124–0.26)  |
| Severe vision impairment due to glaucoma               | Distance vision, severe impairment      | has severe vision loss, which causes difficulty in daily activities, some emotional impact (for example worry), and some difficulty going outside the home without assistance.                                             | 0.184<br>(0.125–0.258) |
| Moderate vision impairment due to glaucoma             | Distance vision, moderate impairment    | has vision problems that make it difficult to recognize faces or objects across a room.                                                                                                                                    | 0.031<br>(0.019–0.049) |
| Severe vision impairment due to cataract               | Distance vision, severe impairment      | has severe vision loss, which causes difficulty in daily activities, some emotional impact (for example worry), and some difficulty going outside the home without assistance.                                             | 0.184<br>(0.125–0.258) |
| Blindness due to cataract                              | Distance vision blindness               | is completely blind, which causes great difficulty in some daily activities, worry and anxiety, and great difficulty going outside the home without assistance.                                                            | 0.187<br>(0.124–0.26)  |
| Moderate vision impairment due to cataract             | Distance vision, moderate impairment    | has vision problems that make it difficult to recognize faces or objects across a room.                                                                                                                                    | 0.031<br>(0.019–0.049) |
| Blindness due to macular degeneration                  | Distance vision blindness               | is completely blind, which causes great difficulty in some daily activities, worry and anxiety, and great difficulty going outside the home without assistance.                                                            | 0.187<br>(0.124–0.26)  |
| Severe vision impairment due to macular degeneration   | Distance vision, severe impairment      | has severe vision loss, which causes difficulty in daily activities, some emotional impact (for example worry), and some difficulty going outside the home without assistance.                                             | 0.184<br>(0.125–0.258) |
| Moderate vision impairment due to macular degeneration | Distance vision, moderate impairment    | has vision problems that make it difficult to recognize faces or objects across a room.                                                                                                                                    | 0.031<br>(0.019–0.049) |

**Appendix Table 6. GBD 2016 sequelae, health states, health state lay descriptions, and disability weights**

| Sequela                                                                               | Health state name                             | Health state lay description                                                                                                                                                                                                                                                                                                                                                                   | Disability weight      |
|---------------------------------------------------------------------------------------|-----------------------------------------------|------------------------------------------------------------------------------------------------------------------------------------------------------------------------------------------------------------------------------------------------------------------------------------------------------------------------------------------------------------------------------------------------|------------------------|
| Near vision impairment                                                                | Presbyopia                                    | has difficulty seeing things that are nearer than 3 feet, but has no difficulty with seeing things at a distance.                                                                                                                                                                                                                                                                              | 0.011<br>(0.005–0.02)  |
| Blindness due to uncorrected refractive error                                         | Distance vision blindness                     | is completely blind, which causes great difficulty in some daily activities, worry and anxiety, and great difficulty going outside the home without assistance.                                                                                                                                                                                                                                | 0.187<br>(0.124–0.26)  |
| Severe vision impairment due to uncorrected refractive error                          | Distance vision, severe impairment            | has severe vision loss, which causes difficulty in daily activities, some emotional impact (for example worry), and some difficulty going outside the home without assistance.                                                                                                                                                                                                                 | 0.184<br>(0.125–0.258) |
| Moderate vision impairment due to uncorrected refractive error                        | Distance vision, moderate impairment          | has vision problems that make it difficult to recognize faces or objects across a room.                                                                                                                                                                                                                                                                                                        | 0.031<br>(0.019–0.049) |
| Mild hearing loss due to age-related and other hearing loss                           | Hearing loss, mild                            | has great difficulty hearing and understanding another person talking in a noisy place (for example, on an urban street). cannot hear at all in any situation, including even the loudest sounds, and cannot communicate verbally or use a phone. Difficulties with communicating and relating to others often cause worry, depression or loneliness.                                          | 0.01<br>(0.004–0.019)  |
| Complete hearing loss due to age-related and other hearing loss                       | Hearing loss, complete                        | is unable to hear and understand another person talking in a noisy place (for example, on an urban street), and has difficulty hearing another person talking even in a quiet place or on the phone.                                                                                                                                                                                           | 0.215<br>(0.144–0.307) |
| Moderate hearing loss due to age-related and other hearing loss                       | Hearing loss, moderate                        | is unable to hear and understand another person talking, even in a quiet place, is unable to take part in a phone conversation, and has great difficulty hearing anything in any other situation. Difficulties with communicating and relating to others often cause worry, depression, and loneliness.                                                                                        | 0.027<br>(0.015–0.042) |
| Moderate hearing loss with ringing due to age-related and other hearing loss          | Hearing loss, moderate, with ringing          | is unable to hear and understand another person talking, even in a quiet place, and has annoying ringing in the ears for more than 5 minutes at a time, almost everyday.                                                                                                                                                                                                                       | 0.074<br>(0.049–0.107) |
| Profound hearing loss due to age-related and other hearing loss                       | Hearing loss, profound                        | is unable to hear and understand another person talking, even in a quiet place, and unable to take part in a phone conversation. Difficulties with communicating and relating to others cause emotional impact at times (for example worry or depression).                                                                                                                                     | 0.204<br>(0.134–0.288) |
| Severe hearing loss due to age-related and other hearing loss                         | Hearing loss, severe                          | is unable to hear and understand another person talking, even in a quiet place, and unable to take part in a phone conversation, and has annoying ringing in the ears for more than 5 minutes at a time, almost everyday. Difficulties with communicating and relating to others cause emotional impact at times (for example worry or depression).                                            | 0.158<br>(0.105–0.227) |
| Severe hearing loss with ringing due to age-related and other hearing loss            | Hearing loss, severe, with ringing            | is unable to hear and understand another person talking, even in a quiet place, is unable to take part in a phone conversation, and has great difficulty hearing anything in any other situation. Difficulties with communicating and relating to others often cause worry, depression or loneliness.                                                                                          | 0.261<br>(0.175–0.36)  |
| Mild hearing loss with ringing due to age-related and other hearing loss              | Hearing loss, mild, with ringing              | has great difficulty hearing and understanding another person talking in a noisy place (for example, on an urban street), and sometimes has annoying ringing in the ears.                                                                                                                                                                                                                      | 0.021<br>(0.012–0.036) |
| Profound hearing loss with ringing due to age-related and other hearing loss          | Hearing loss, profound, with ringing          | is unable to hear and understand another person talking, even in a quiet place, is unable to take part in a phone conversation, has great difficulty hearing anything in any other situation, and has annoying ringing in the ears for more than 5 minutes at a time, several times a day. Difficulties with communicating and relating to others often cause worry, depression or loneliness. | 0.277<br>(0.182–0.387) |
| Moderately severe hearing loss with ringing due to age-related and other hearing loss | Hearing loss, moderately severe, with ringing | (custom DW from hearing loss impairment envelope)                                                                                                                                                                                                                                                                                                                                              | --                     |
| Moderately severe hearing loss due to age-related and other hearing loss              | Hearing loss, moderately severe               | (custom DW from hearing loss impairment envelope)                                                                                                                                                                                                                                                                                                                                              | --                     |
| Complete hearing loss with ringing due to age-related and other hearing loss          | Hearing loss, complete, with ringing          | cannot hear at all in any situation, including even the loudest sounds, and cannot communicate verbally or use a phone, and has very annoying ringing in the ears for more than half of the day. Difficulties with communicating and relating to others often cause worry, depression or loneliness.                                                                                           | 0.316<br>(0.212–0.435) |
| Blindness due to other vision loss                                                    | Distance vision blindness                     | is completely blind, which causes great difficulty in some daily activities, worry and anxiety, and great difficulty going outside the home without assistance.                                                                                                                                                                                                                                | 0.187<br>(0.124–0.26)  |
| Severe vision impairment due to other vision loss                                     | Distance vision, severe impairment            | has severe vision loss, which causes difficulty in daily activities, some emotional impact (for example worry), and some difficulty going outside the home without assistance.                                                                                                                                                                                                                 | 0.184<br>(0.125–0.258) |
| Moderate vision impairment due to other vision loss                                   | Distance vision, moderate impairment          | has vision problems that make it difficult to recognize faces or objects across a room.                                                                                                                                                                                                                                                                                                        | 0.031<br>(0.019–0.049) |
| Asymptomatic acute sense organ diseases                                               | Asymptomatic                                  | --                                                                                                                                                                                                                                                                                                                                                                                             | --                     |
| Asymptomatic chronic sense organ diseases                                             | Asymptomatic                                  | --                                                                                                                                                                                                                                                                                                                                                                                             | --                     |
| Moderate acute sense organ diseases                                                   | Disfigurement, level 1                        | has a slight, visible physical deformity that others notice, which causes some worry and discomfort.                                                                                                                                                                                                                                                                                           | 0.011<br>(0.005–0.021) |
| Severe chronic sense organ diseases                                                   | Vertigo                                       | --                                                                                                                                                                                                                                                                                                                                                                                             | 0.113<br>(0.074–0.158) |
| Mild acute sense organ diseases                                                       | Infectious disease, acute episode, mild       | has a low fever and mild discomfort, but no difficulty with daily activities.                                                                                                                                                                                                                                                                                                                  | 0.006<br>(0.002–0.012) |
| Moderate chronic sense organ diseases                                                 | Disfigurement, level 1                        | has a slight, visible physical deformity that others notice, which causes some worry and discomfort.                                                                                                                                                                                                                                                                                           | 0.011<br>(0.005–0.021) |
| Pain due to caries of deciduous teeth                                                 | Dental caries, symptomatic                    | has a toothache, which causes some difficulty in eating.                                                                                                                                                                                                                                                                                                                                       | 0.01<br>(0.005–0.019)  |



**Appendix Table 6. GBD 2016 sequelae, health states, health state lay descriptions, and disability weights**

| Sequela                                                   | Health state name                           | Health state lay description                                                                                           | Disability weight      |
|-----------------------------------------------------------|---------------------------------------------|------------------------------------------------------------------------------------------------------------------------|------------------------|
| Asymptomatic caries of deciduous teeth                    | Asymptomatic                                | --                                                                                                                     | --                     |
| Pain due to caries of permanent teeth                     | Dental caries, symptomatic                  | has a toothache, which causes some difficulty in eating.                                                               | 0.01<br>(0.005–0.019)  |
| Asymptomatic caries of permanent teeth                    | Asymptomatic                                | --                                                                                                                     | --                     |
| Chronic periodontal diseases                              | Periodontitis                               | has minor bleeding of the gums from time to time, with mild discomfort.                                                | 0.007<br>(0.003–0.014) |
| Asymptomatic edentulism and severe tooth loss             | Asymptomatic                                | --                                                                                                                     | --                     |
| Difficulty eating due to edentulism and severe tooth loss | Severe tooth loss                           | has lost more than 20 teeth including front and back, and has great difficulty in eating meat, fruits, and vegetables. | 0.067<br>(0.045–0.095) |
| Mild other oral disorders                                 | Infectious disease, acute episode, mild     | has a low fever and mild discomfort, but no difficulty with daily activities.                                          | 0.006<br>(0.002–0.012) |
| Severe other oral disorders                               | Infectious disease, acute episode, moderate | has a fever and aches, and feels weak, which causes some difficulty with daily activities.                             | 0.051<br>(0.032–0.074) |

**Appendix Table 7: GBD 2016 methods of estimating years lived with disability (YLDs) for 35 residual categories**

| Residual                                       | Method                                                                                                                                                                                                                                                                                                                                                                                                                                                                                                                                                                                                                                                                                                                                                                                                                                                                                                                                         |
|------------------------------------------------|------------------------------------------------------------------------------------------------------------------------------------------------------------------------------------------------------------------------------------------------------------------------------------------------------------------------------------------------------------------------------------------------------------------------------------------------------------------------------------------------------------------------------------------------------------------------------------------------------------------------------------------------------------------------------------------------------------------------------------------------------------------------------------------------------------------------------------------------------------------------------------------------------------------------------------------------|
|                                                | <b>Estimation: YLD to YLL ratio method</b>                                                                                                                                                                                                                                                                                                                                                                                                                                                                                                                                                                                                                                                                                                                                                                                                                                                                                                     |
| Other intestinal infectious diseases           | YLD to YLL ratio of explicitly estimated intestinal infectious diseases by geography, country, sex applied to YLL from other intestinal infectious diseases by geography, country, sex and age. Causes used for estimation include: Typhoid fever, Paratyphoid fever.                                                                                                                                                                                                                                                                                                                                                                                                                                                                                                                                                                                                                                                                          |
| Other neglected tropical diseases              | YLD to YLL ratio of explicitly estimated neglected tropical disease causes by geography, country, sex applied to YLL from other neglected tropical diseases by geography, country, sex and age. Causes used for estimation include: Chagas disease, Visceral leishmaniasis, Dengue, Yellow fever, Rabies.                                                                                                                                                                                                                                                                                                                                                                                                                                                                                                                                                                                                                                      |
| Other maternal disorders                       | YLD to YLL ratio of explicitly estimated maternal disorder causes by geography, country, sex applied to YLL from other maternal disorders by geography, country, sex and age. Causes used for estimation include: Maternal hemorrhage, Maternal sepsis and other maternal infections, Maternal hypertensive disorders, Maternal obstructed labor and uterine rupture, Maternal abortion, miscarriage, and ectopic pregnancy, Indirect maternal deaths, Late maternal deaths, Maternal deaths aggravated by HIV/AIDS.                                                                                                                                                                                                                                                                                                                                                                                                                           |
| Other neonatal disorders                       | YLD to YLL ratio of explicitly estimated neonatal disorders by geography, country, sex applied to YLL from other neonatal disorders by geography, country, sex and age. Causes used for estimation include: Neonatal preterm birth complications, Neonatal encephalopathy due to birth asphyxia and trauma, Neonatal sepsis and other neonatal infections, Hemolytic disease and other neonatal jaundice.                                                                                                                                                                                                                                                                                                                                                                                                                                                                                                                                      |
| Other nutritional deficiencies                 | YLD to YLL ratio of explicitly estimated nutritional deficiencies by geography, country, sex applied to YLL from other nutritional deficiencies by geography, country, sex and age. Causes used for estimation include Protein-energy malnutrition.                                                                                                                                                                                                                                                                                                                                                                                                                                                                                                                                                                                                                                                                                            |
| Other sexually transmitted diseases            | YLD to YLL ratio of gonococcal and chlamydial infection by geography, country, sex applied to YLL from other sexually transmitted diseases by geography, country, sex and age. Causes used for estimation include: Chlamydial infection, Gonococcal infection.                                                                                                                                                                                                                                                                                                                                                                                                                                                                                                                                                                                                                                                                                 |
| Other infectious diseases                      | YLD to YLL ratio of HIV/AIDS and tuberculosis, diarrhea, lower respiratory and other common infectious diseases, neglected tropical diseases and malaria, sexually transmitted diseases and hepatitis by geography, country, sex applied to YLL from other infectious diseases by geography, country, sex and age. Causes used for estimation include: Typhoid fever, Paratyphoid fever, Lower respiratory infections, Upper respiratory infections, Varicella and herpes zoster, Malaria, Acute hepatitis A, Hepatitis B, Hepatitis C, Acute hepatitis E, Chlamydial infection, Gonococcal infection, Diphtheria, Whooping cough, Measles, Chagas disease, Visceral leishmaniasis, Dengue, Yellow fever, Maternal sepsis and other maternal infections, Pneumococcal meningitis, H influenzae type B meningitis, Meningococcal meningitis, Other meningitis, Encephalitis, Tetanus, Ascariasis, Neonatal sepsis and other neonatal infections |
| Other chronic respiratory diseases             | YLD to YLL ratio of COPD, pneumoconiosis and interstitial lung disease and pulmonary sarcoidosis by geography, country, sex applied to YLL from other chronic respiratory diseases by geography, country, sex and age. Causes used for estimation include: Chronic obstructive pulmonary disease, Silicosis, Asbestosis, Coal workers pneumoconiosis, Other pneumoconiosis, Interstitial lung disease and pulmonary sarcoidosis                                                                                                                                                                                                                                                                                                                                                                                                                                                                                                                |
| Other digestive disorders                      | YLD to YLL ratio of explicitly estimated digestive disorders by geography, country, sex applied to YLL from other digestive disorders by geography, country, sex and age. Causes used for estimation include: Gastritis and duodenitis, Appendicitis, Paralytic ileus and intestinal obstruction, Inguinal, femoral, and abdominal hernia, Inflammatory bowel disease, Vascular intestinal disorders, Gallbladder and biliary diseases, Pancreatitis                                                                                                                                                                                                                                                                                                                                                                                                                                                                                           |
| Other neurological disorders                   | YLD to YLL ratio of Alzheimer and other dementias, Parkinson disease, multiple sclerosis and motor-neuron disease by geography, country, sex applied to YLL from other neurological disorders by geography, country, sex and age. Causes used for estimation include: Alzheimer disease and other dementias, Parkinson disease, Epilepsy, Multiple sclerosis                                                                                                                                                                                                                                                                                                                                                                                                                                                                                                                                                                                   |
| Other urinary diseases                         | YLD to YLL ratio of explicitly estimated urinary diseases by geography, country, sex applied to YLL from other urinary diseases by geography, country, sex and age. Causes used for estimation include: Interstitial nephritis and urinary tract infections, Urolithiasis                                                                                                                                                                                                                                                                                                                                                                                                                                                                                                                                                                                                                                                                      |
| Other hemoglobinopathies and hemolytic anemias | YLD to YLL ratio of explicitly estimated hemoglobinopathies and hemolytic anemias by geography, country, sex applied to YLL from other hemoglobinopathies and hemolytic anemias by geography, country, sex and age. Causes used for estimation include: Thalassemias, Sickle cell disorders, G6PD deficiency                                                                                                                                                                                                                                                                                                                                                                                                                                                                                                                                                                                                                                   |
| Other congenital anomalies                     | YLD to YLL ratio of explicitly estimated congenital anomalies by geography, country, sex applied to YLL from other congenital anomalies by geography, country, sex and age. Causes used for estimation include: Neural tube defects, Congenital heart anomalies                                                                                                                                                                                                                                                                                                                                                                                                                                                                                                                                                                                                                                                                                |
|                                                | <b>Estimation: based on epidemiological data</b>                                                                                                                                                                                                                                                                                                                                                                                                                                                                                                                                                                                                                                                                                                                                                                                                                                                                                               |

**Appendix Table 7: GBD 2016 methods of estimating years lived with disability (YLDs) for 35 residual categories**

| Residual                                                       | Method                                                                                                                                                                                                                                                                                                                                                                                                           |
|----------------------------------------------------------------|------------------------------------------------------------------------------------------------------------------------------------------------------------------------------------------------------------------------------------------------------------------------------------------------------------------------------------------------------------------------------------------------------------------|
| Meningitis due to other causes                                 | Data on proportion of meningitis due to other causes modelled in DisMod-MR 2.1, forced to sum to 100% at 1,000 draw level for each geography-year-age-sex with the proportions for pneumococcal, H influenza B and meningococcal meningitis, and applied to dismod-MR 2.1 model of all meningitis                                                                                                                |
| Pelvic inflammatory disease due to other causes                | DisMod-MR 2.1 model of the proportion of pelvic inflammatory disease due to other causes, constrained to 100% with proportions of pelvic inflammatory disease due to gonococcal and chlamydial infection and applied to the DisMod-MR 2.1 model for all pelvic inflammatory disease                                                                                                                              |
| Other neoplasms                                                | Similar to all other cancers: mortality to incidence ratio method applied to cancer registry data for other neoplasms                                                                                                                                                                                                                                                                                            |
| Liver cancer due to other causes                               | Data on proportion of liver cancer due to other causes modelled in DisMod-MR 2.1, forced to sum to 100% at 1,000 draw level for each geography, year, age, and sex with the proportions for liver cancer due to hepatitis B, hepatitis C and alcohol, and applied to total liver cancer estimates from cancer analyses using mortality to incidence ratios                                                       |
| Other cardiovascular diseases                                  | Ratio of prevalence of ICD-9 coded other cardiovascular diseases in MEPS and 2005 USA outpatient data to prevalence of heart failure due to other cardiovascular diseases (estimated as part of the heart failure envelope), and applied to prevalence of heart failure due to other CVD estimates for all other locations and years                                                                             |
| Cirrhosis and other chronic liver diseases due to other causes | Data on proportion of cirrhosis and other chronic liver diseases due to other causes modelled in DisMod-MR 2.1, forced to sum to 100% at 1,000 draw level for each geography-year-age-sex with the proportions for cirrhosis and other chronic liver diseases due to hepatitis B, hepatitis C and alcohol, and applied to total cirrhosis and other chronic liver diseases estimates from DisMod-MR 2.1 analysis |
| Other pneumoconiosis                                           | DisMod-MR 2.1 model based on hospital admission and claims data                                                                                                                                                                                                                                                                                                                                                  |
| Other drug use disorders                                       | NESARC prevalence of drug dependence other than cannabis, opioids, amphetamines and cocaine multiplied by ratio of YLD to prevalence for cocaine and amphetamine by geography, year, age, and sex                                                                                                                                                                                                                |
| Other mental and substance use disorders                       | Prevalence of personality disorders not comorbid with GBD mental and substance use disorder categories and severity distribution from NESARC and Australian National Survey of Mental Health and Wellbeing 1997                                                                                                                                                                                                  |
| Chronic kidney disease due to other causes                     | Data on proportion of chronic kidney disease due to other causes from renal registries modelled in DisMod-MR 2.1, forced to sum to 100% at 1,000 draw level for each geography-year-age-sex with the proportions of chronic kidney disease due to diabetes, hypertension and glomerulonephritis, and applied to total chronic kidney disease estimates from DisMod-MR 2.1 analyses                               |
| Other gynecological disorders                                  | DisMod MR 2.1 using US claims data                                                                                                                                                                                                                                                                                                                                                                               |
| Other musculoskeletal disorders                                | DisMod-MR 2.1 model of survey and US claims data on prevalence of all musculoskeletal symptoms and diseases minus rheumatoid arthritis, osteoarthritis, gout, low back pain and neck pain. Long-term sequelae of fractures, dislocations and contusions due to injuries are subtracted out of other musculoskeletal disorders to avoid double counting                                                           |
| Other skin                                                     | DisMod-MR 2.1 model using outpatient and US claims data                                                                                                                                                                                                                                                                                                                                                          |
| Age-related and other hearing loss                             | Survey data on the proportion of hearing loss due to age-related and other hearing loss modelled in dismod MR 2.1 and forced to sum to total hearing loss by geography, year, age and sex                                                                                                                                                                                                                        |
| Other vision loss                                              | Survey data on vision loss due to other causes modelled in DisMod-MR 2.1 and forced to sum to total vision loss by geography, year, age and sex                                                                                                                                                                                                                                                                  |
| Other sense organ disorders                                    | DisMod-MR 2.1 model using outpatient and US claims data                                                                                                                                                                                                                                                                                                                                                          |

**Appendix Table 7: GBD 2016 methods of estimating years lived with disability (YLDs) for 35 residual categories**

| <b>Residual</b>                     | <b>Method</b>                                                                                              |
|-------------------------------------|------------------------------------------------------------------------------------------------------------|
| Other oral disorders                | DisMod-MR 2.1 model using US Medical Expenditure Panel Surveys (MEPS) data                                 |
| Other transport injuries            | DisMod-MR 2.1 model using data from surveys, hospital admission and outpatient/emergency department visits |
| Other exposure to mechanical forces | DisMod-MR 2.1 model using data from surveys, hospital admission and outpatient/emergency department visits |
| Foreign body in other part          | DisMod-MR 2.1 model using data from surveys, hospital admission and outpatient/emergency department visits |
| Other unintentional injuries        | DisMod-MR 2.1 model using data from surveys, hospital admission and outpatient/emergency department visits |
| Assault by other means              | DisMod-MR 2.1 model using data from surveys, hospital admission and outpatient/emergency department visits |

**Appendix Table 8. GBD 2016 risk factor hierarchy with levels, modeling strategies, and the main type of data sources used to estimate exposure levels**  
 GBD—Global Burden of Disease.

| Risk factor                                               | Level    | Model type                                                                                                                                                                  | Main data source for exposure                                                                                                                                                                                                                       |
|-----------------------------------------------------------|----------|-----------------------------------------------------------------------------------------------------------------------------------------------------------------------------|-----------------------------------------------------------------------------------------------------------------------------------------------------------------------------------------------------------------------------------------------------|
| <b>All risk factors</b>                                   | <b>0</b> |                                                                                                                                                                             |                                                                                                                                                                                                                                                     |
| <b>Environmental/occupational risks</b>                   | <b>1</b> |                                                                                                                                                                             |                                                                                                                                                                                                                                                     |
| <b>Unsafe water, sanitation, and handwashing</b>          | <b>2</b> |                                                                                                                                                                             |                                                                                                                                                                                                                                                     |
| Unsafe water source                                       | 3        | Spatiotemporal Gaussian process regression (ST-GPR)                                                                                                                         | Population surveys and censuses                                                                                                                                                                                                                     |
| Unsafe sanitation                                         | 3        | ST-GPR                                                                                                                                                                      | Population surveys and censuses                                                                                                                                                                                                                     |
| No handwashing with soap                                  | 3        | ST-GPR                                                                                                                                                                      | Population surveys, censuses, and epidemiological studies                                                                                                                                                                                           |
| <b>Air pollution</b>                                      | <b>2</b> |                                                                                                                                                                             |                                                                                                                                                                                                                                                     |
| Ambient particulate matter pollution                      | 3        | Regression crosswalk between grid-level fusion of satellite/chemical transport models and ground level monitoring data                                                      | Atmospheric chemical transport models, satellite measurements of aerosols in the atmosphere, data from ground-level monitoring sites                                                                                                                |
| Household air pollution from solid fuels                  | 3        | ST-GPR                                                                                                                                                                      | Population surveys and censuses, WHO Energy Database, literature review                                                                                                                                                                             |
| Ambient ozone pollution                                   | 3        | Chemical transport model                                                                                                                                                    | Atmospheric chemical transport models                                                                                                                                                                                                               |
| <b>Other environmental risks</b>                          | <b>2</b> |                                                                                                                                                                             |                                                                                                                                                                                                                                                     |
| Residential radon                                         | 3        | ST-GPR                                                                                                                                                                      | Literature review, government agencies, and monitoring stations                                                                                                                                                                                     |
| Lead exposure                                             | 3        | ST-GPR                                                                                                                                                                      | Literature review, blood lead surveys                                                                                                                                                                                                               |
| <b>Occupational risks</b>                                 | <b>2</b> |                                                                                                                                                                             |                                                                                                                                                                                                                                                     |
| Occupational carcinogens                                  | 3        |                                                                                                                                                                             |                                                                                                                                                                                                                                                     |
| Occupational exposure to asbestos                         | 4        | Asbestos Impact Ratio approach                                                                                                                                              | GBD cause-specific mortality data for mesothelioma, epidemiological studies                                                                                                                                                                         |
| Occupational exposure to arsenic                          | 4        | ST-GPR                                                                                                                                                                      | Labor force surveys, censuses, and international information system on occupational exposure to carcinogens                                                                                                                                         |
| Occupational exposure to benzene                          | 4        | ST-GPR                                                                                                                                                                      | Labor force surveys, censuses, and international information system on occupational exposure to carcinogens                                                                                                                                         |
| Occupational exposure to beryllium                        | 4        | ST-GPR                                                                                                                                                                      | Labor force surveys, censuses, and international information system on occupational exposure to carcinogens                                                                                                                                         |
| Occupational exposure to cadmium                          | 4        | ST-GPR                                                                                                                                                                      | Labor force surveys, censuses, and international information system on occupational exposure to carcinogens                                                                                                                                         |
| Occupational exposure to chromium                         | 4        | ST-GPR                                                                                                                                                                      | Labor force surveys, censuses, and international information system on occupational exposure to carcinogens                                                                                                                                         |
| Occupational exposure to diesel engine exhaust            | 4        | ST-GPR                                                                                                                                                                      | Labor force surveys, censuses, and international information system on occupational exposure to carcinogens                                                                                                                                         |
| Occupational exposure to second-hand smoke                | 4        | ST-GPR                                                                                                                                                                      | Labor force surveys, censuses, and international information system on occupational exposure to carcinogens                                                                                                                                         |
| Occupational exposure to formaldehyde                     | 4        | ST-GPR                                                                                                                                                                      | Labor force surveys, censuses, and international information system on occupational exposure to carcinogens                                                                                                                                         |
| Occupational exposure to nickel                           | 4        | ST-GPR                                                                                                                                                                      | Labor force surveys, censuses, and international information system on occupational exposure to carcinogens                                                                                                                                         |
| Occupational exposure to polycyclic aromatic hydrocarbons | 4        | ST-GPR                                                                                                                                                                      | Labor force surveys, censuses, and international information system on occupational exposure to carcinogens                                                                                                                                         |
| Occupational exposure to silica                           | 4        | ST-GPR                                                                                                                                                                      | Labor force surveys, censuses, and international information system on occupational exposure to carcinogens                                                                                                                                         |
| Occupational exposure to sulphuric acid                   | 4        | ST-GPR                                                                                                                                                                      | Labor force surveys, censuses, and international information system on occupational exposure to carcinogens                                                                                                                                         |
| Occupational exposure to trichloroethylene                | 4        | ST-GPR                                                                                                                                                                      | Labor force surveys, censuses, and international information system on occupational exposure to carcinogens                                                                                                                                         |
| Occupational asthmagens                                   | 3        | ST-GPR                                                                                                                                                                      | Labor force surveys and censuses                                                                                                                                                                                                                    |
| Occupational particulate matter, gases, and fumes         | 3        | ST-GPR                                                                                                                                                                      | Labor force surveys and censuses                                                                                                                                                                                                                    |
| Occupational noise                                        | 3        | ST-GPR                                                                                                                                                                      | Labor force surveys and censuses, industry-based surveys of noise exposure                                                                                                                                                                          |
| Occupational injuries                                     | 3        | ST-GPR                                                                                                                                                                      | International Labor Organization injury database                                                                                                                                                                                                    |
| Occupational ergonomic factors                            | 3        | ST-GPR                                                                                                                                                                      | Labor force surveys and censuses                                                                                                                                                                                                                    |
| <b>Behavioural risks</b>                                  | <b>1</b> |                                                                                                                                                                             |                                                                                                                                                                                                                                                     |
| <b>Child and maternal malnutrition</b>                    | <b>2</b> |                                                                                                                                                                             |                                                                                                                                                                                                                                                     |
| Suboptimal breastfeeding                                  | 3        |                                                                                                                                                                             |                                                                                                                                                                                                                                                     |
| Non-exclusive breastfeeding                               | 4        | ST-GPR                                                                                                                                                                      | Population surveys                                                                                                                                                                                                                                  |
| Discontinued breastfeeding                                | 4        | ST-GPR                                                                                                                                                                      | Population surveys                                                                                                                                                                                                                                  |
| Child growth failure                                      | 3        |                                                                                                                                                                             |                                                                                                                                                                                                                                                     |
| Childhood underweight                                     | 4        | DisMod-MR 2.1                                                                                                                                                               | Population surveys, literature review, and WHO Global Database on Child Growth and Malnutrition                                                                                                                                                     |
| Childhood wasting                                         | 4        | DisMod-MR 2.1                                                                                                                                                               | Population surveys, literature review, and WHO Global Database on Child Growth and Malnutrition                                                                                                                                                     |
| Childhood stunting                                        | 4        | DisMod-MR 2.1                                                                                                                                                               | Population surveys, literature review, and WHO Global Database on Child Growth and Malnutrition                                                                                                                                                     |
| Low birth weight and short gestation                      | 3        |                                                                                                                                                                             |                                                                                                                                                                                                                                                     |
| Low birth weight for gestation                            | 4        | Joint distribution using Copula optimization                                                                                                                                | Population surveys and censuses, vital registration                                                                                                                                                                                                 |
| Short gestation for birth weight                          | 4        | Joint distribution using Copula optimization                                                                                                                                | Population surveys and censuses, vital registration                                                                                                                                                                                                 |
| Iron deficiency                                           | 3        | Mixed effect regression                                                                                                                                                     | Population surveys, examination surveys, and epidemiological studies                                                                                                                                                                                |
| Vitamin A deficiency                                      | 3        | DisMod-MR 2.1                                                                                                                                                               | Population surveys, examination surveys, and epidemiological studies                                                                                                                                                                                |
| Zinc deficiency                                           | 3        | Mixed effect regression based on stunting prevalence and dietary composition                                                                                                | FAO food balance sheets                                                                                                                                                                                                                             |
| <b>Tobacco smoke</b>                                      | <b>2</b> |                                                                                                                                                                             |                                                                                                                                                                                                                                                     |
| Smoking                                                   | 3        | <ul style="list-style-type: none"> <li>Smoking Impact Ratio (SIR) calculated from lung cancer mortality rates</li> <li>Smoking prevalence estimated using ST-GPR</li> </ul> | SIR input data: mortality and cause of death data including vital registration and verbal autopsy<br>Smoking prevalence input data: nationally representative survey and report data and WHO InfoBase and International Smoking Statistics Database |
| Second-hand smoke                                         | 3        | ST-GPR                                                                                                                                                                      | Household surveys and national health surveys                                                                                                                                                                                                       |
| Smokeless tobacco                                         | 3        | ST-GPR                                                                                                                                                                      | Nationally representative survey report and report data, literature review                                                                                                                                                                          |

| Risk factor                             | Level | Model type                                                                                                                                                                                                                                                                                                                                                                                                                                                                                                                                      | Main data source for exposure                                                                                                                                                                                              |
|-----------------------------------------|-------|-------------------------------------------------------------------------------------------------------------------------------------------------------------------------------------------------------------------------------------------------------------------------------------------------------------------------------------------------------------------------------------------------------------------------------------------------------------------------------------------------------------------------------------------------|----------------------------------------------------------------------------------------------------------------------------------------------------------------------------------------------------------------------------|
| <b>Alcohol and drug use</b>             |       |                                                                                                                                                                                                                                                                                                                                                                                                                                                                                                                                                 |                                                                                                                                                                                                                            |
|                                         | 2     |                                                                                                                                                                                                                                                                                                                                                                                                                                                                                                                                                 |                                                                                                                                                                                                                            |
| Alcohol use                             | 3     | <ul style="list-style-type: none"> <li>Alcohol consumption per capita obtained from the FAO and the WHO Global Information System on Alcohol and Health (GISAH)</li> <li>ST-GPR used to integrate the data and to derive coherent time series for each country</li> <li>Prevalence of current alcohol drinkers, lifetime abstainers, former drinkers, and binge drinkers estimated using DisMod-MR 2.1</li> <li>DisMod-MR 2.1 used to estimate the relative sex- and age-specific pattern of alcohol consumption in current drinkers</li> </ul> | Population surveys, alcohol sales, production, and other economic statistics                                                                                                                                               |
| Drug use                                | 3     | DisMod-MR 2.1                                                                                                                                                                                                                                                                                                                                                                                                                                                                                                                                   | Systematic review of published literature, reports from governments and international organizations, which include data from: school surveys, population surveys, registration data, and indirect estimates of prevalence  |
| <b>Dietary risks</b>                    |       |                                                                                                                                                                                                                                                                                                                                                                                                                                                                                                                                                 |                                                                                                                                                                                                                            |
|                                         | 2     |                                                                                                                                                                                                                                                                                                                                                                                                                                                                                                                                                 |                                                                                                                                                                                                                            |
| Diet low in fruits                      | 3     | DisMod-MR 2.1                                                                                                                                                                                                                                                                                                                                                                                                                                                                                                                                   | Nutrition and health surveys, FAO food balance sheets                                                                                                                                                                      |
| Diet low in vegetables                  | 3     | DisMod-MR 2.1                                                                                                                                                                                                                                                                                                                                                                                                                                                                                                                                   | Nutrition and health surveys, FAO food balance sheets                                                                                                                                                                      |
| Diet low in legumes                     | 3     | DisMod-MR 2.1                                                                                                                                                                                                                                                                                                                                                                                                                                                                                                                                   | Nutrition and health surveys                                                                                                                                                                                               |
| Diet low in whole grains                | 3     | DisMod-MR 2.1                                                                                                                                                                                                                                                                                                                                                                                                                                                                                                                                   | Nutrition and health surveys                                                                                                                                                                                               |
| Diet low in nuts and seeds              | 3     | DisMod-MR 2.1                                                                                                                                                                                                                                                                                                                                                                                                                                                                                                                                   | Nutrition and health surveys, FAO food balance sheets                                                                                                                                                                      |
| Diet low in milk                        | 3     | DisMod-MR 2.1                                                                                                                                                                                                                                                                                                                                                                                                                                                                                                                                   | Nutrition and health surveys, FAO food balance sheets                                                                                                                                                                      |
| Diet high in red meat                   | 3     | DisMod-MR 2.1                                                                                                                                                                                                                                                                                                                                                                                                                                                                                                                                   | Nutrition and health surveys, FAO food balance sheets                                                                                                                                                                      |
| Diet high in processed meat             | 3     | DisMod-MR 2.1                                                                                                                                                                                                                                                                                                                                                                                                                                                                                                                                   | Nutrition and health surveys                                                                                                                                                                                               |
| Diet high in sugar-sweetened beverages  | 3     | DisMod-MR 2.1                                                                                                                                                                                                                                                                                                                                                                                                                                                                                                                                   | Nutrition and health surveys                                                                                                                                                                                               |
| Diet low in fibre                       | 3     | DisMod-MR 2.1                                                                                                                                                                                                                                                                                                                                                                                                                                                                                                                                   | Nutrition and health surveys, FAO SUA/USDA                                                                                                                                                                                 |
| Diet suboptimal in calcium              | 3     | DisMod-MR 2.1                                                                                                                                                                                                                                                                                                                                                                                                                                                                                                                                   | Nutrition and health surveys, FAO SUA/USDA                                                                                                                                                                                 |
| Diet low in seafood omega-3 fatty acids | 3     | DisMod-MR 2.1                                                                                                                                                                                                                                                                                                                                                                                                                                                                                                                                   | Nutrition and health surveys, FAO SUA/USDA                                                                                                                                                                                 |
| Diet low in polyunsaturated fatty acids | 3     | DisMod-MR 2.1                                                                                                                                                                                                                                                                                                                                                                                                                                                                                                                                   | Nutrition and health surveys, FAO SUA/USDA                                                                                                                                                                                 |
| Diet high in trans fatty acids          | 3     | DisMod-MR 2.1                                                                                                                                                                                                                                                                                                                                                                                                                                                                                                                                   | Nutrition and health surveys, availability of partially hydrogenated vegetable oil in packaged foods                                                                                                                       |
| Diet high in sodium                     | 3     | DisMod-MR 2.1                                                                                                                                                                                                                                                                                                                                                                                                                                                                                                                                   | Nutrition and health surveys, 24-hour urinary sodium                                                                                                                                                                       |
| <b>Sexual abuse and violence</b>        |       |                                                                                                                                                                                                                                                                                                                                                                                                                                                                                                                                                 |                                                                                                                                                                                                                            |
|                                         | 2     |                                                                                                                                                                                                                                                                                                                                                                                                                                                                                                                                                 |                                                                                                                                                                                                                            |
| Childhood sexual abuse                  | 3     | DisMod-MR 2.1                                                                                                                                                                                                                                                                                                                                                                                                                                                                                                                                   | Systematic review of published literature, national health surveys, violence-specific surveys                                                                                                                              |
| Intimate partner violence               | 3     | DisMod-MR 2.1                                                                                                                                                                                                                                                                                                                                                                                                                                                                                                                                   | Systematic review of published literature, national health surveys, violence-specific surveys                                                                                                                              |
| Unsafe sex                              | 2     | DisMod-MR 2.1                                                                                                                                                                                                                                                                                                                                                                                                                                                                                                                                   | UNAIDS country progress reports, disease surveillance reports                                                                                                                                                              |
| Low physical activity                   | 2     | DisMod-MR 2.1                                                                                                                                                                                                                                                                                                                                                                                                                                                                                                                                   | Surveys of the adult population that capture reported frequency, duration and intensity of physical activity undertaken in the past seven days across all domains of life (work, transport, recreation or house/yard work) |
| <b>Metabolic risks</b>                  |       |                                                                                                                                                                                                                                                                                                                                                                                                                                                                                                                                                 |                                                                                                                                                                                                                            |
|                                         | 1     |                                                                                                                                                                                                                                                                                                                                                                                                                                                                                                                                                 |                                                                                                                                                                                                                            |
| High fasting plasma glucose             | 2     | ST-GPR                                                                                                                                                                                                                                                                                                                                                                                                                                                                                                                                          | Examination surveys and epidemiological studies                                                                                                                                                                            |
| High total cholesterol                  | 2     | ST-GPR                                                                                                                                                                                                                                                                                                                                                                                                                                                                                                                                          | Examination surveys and epidemiological studies                                                                                                                                                                            |
| High systolic blood pressure            | 2     | ST-GPR                                                                                                                                                                                                                                                                                                                                                                                                                                                                                                                                          | Examination surveys and epidemiological studies                                                                                                                                                                            |
| High body-mass index                    | 2     | ST-GPR                                                                                                                                                                                                                                                                                                                                                                                                                                                                                                                                          | Examination surveys and epidemiological studies                                                                                                                                                                            |
| Low bone mineral density                | 2     | DisMod-MR 2.1                                                                                                                                                                                                                                                                                                                                                                                                                                                                                                                                   | Examination surveys and epidemiological studies                                                                                                                                                                            |
| Impaired kidney function                | 2     | DisMod-MR 2.1                                                                                                                                                                                                                                                                                                                                                                                                                                                                                                                                   | Examination surveys and epidemiological studies                                                                                                                                                                            |

**Appendix Table 9. Types of Comparative Risk Assessments (CRA) based on the time perspective and the nature of the counterfactual level or distribution of exposure.** The shaded box represents the type of CRA currently undertaken in GBD 2016. GBD=Global Burden of Disease.

|                                                                                                                                                                   | <b>Counterfactual distributions of exposure</b>                         |                                                                                                                                    |                                                                                                               |                                                                                                               |
|-------------------------------------------------------------------------------------------------------------------------------------------------------------------|-------------------------------------------------------------------------|------------------------------------------------------------------------------------------------------------------------------------|---------------------------------------------------------------------------------------------------------------|---------------------------------------------------------------------------------------------------------------|
| Construct                                                                                                                                                         | Theoretical minimum risk: level of risk with the lowest level of burden | Plausible minimum risk: level of risk with the lowest level of burden that could be imagined with current technology and knowledge | Feasible minimum risk: level of risk with the lowest level of burden that has been achieved in any population | Cost-effective minimum risk: lowest level of risk that can be achieved cost-effectively in a given population |
| <b>Attributable burden:</b> burden of disease today that would be avoided if each individual in the past had been exposed to the counterfactual level of exposure | <b>Currently in GBD</b>                                                 |                                                                                                                                    |                                                                                                               |                                                                                                               |
| <b>Avoidable burden:</b> burden of disease in the future that would be avoided if each individual today was shifted to the counterfactual level of exposure       |                                                                         |                                                                                                                                    |                                                                                                               |                                                                                                               |

**Appendix Table 10. Percent change in age-standardised summary exposure values (SEVs) for leading ten risk factors for the United States 1990-2016, both sexes**

|                      | High body-mass index   | Smoking                   | High fasting plasma glucose | High systolic blood pressure | Drug use                | Alcohol use              | High total cholesterol    | Diet low in whole grains | Impaired kidney function | Diet low in fruits        |
|----------------------|------------------------|---------------------------|-----------------------------|------------------------------|-------------------------|--------------------------|---------------------------|--------------------------|--------------------------|---------------------------|
| United States        | 53.2<br>(41.5 to 67.2) | -42.8<br>(-47.1 to -37.2) | 76.0<br>(44.4 to 144.2)     | -13.3<br>(-13.9 to -12.6)    | 10.1<br>(7.5 to 12.8)   | 6.0<br>(-24.2 to 42.1)   | -17.2<br>(-19.4 to -15.4) | -8.0<br>(-12.5 to -0.8)  | 0.5<br>(-0.6 to 2.1)     | -11.1<br>(-14.5 to -8.7)  |
| Alabama              | 66.7<br>(48.0 to 94.3) | -24.3<br>(-33.0 to -15.2) | 123.2<br>(53.3 to 289.8)    | -12.7<br>(-15.8 to -9.7)     | 9.1<br>(5.6 to 11.8)    | 4.7<br>(-51.0 to 99.5)   | -15.9<br>(-19.2 to -12.8) | -8.3<br>(-14.4 to -0.6)  | 2.9<br>(1.4 to 5.0)      | 4.4<br>(1.8 to 8.2)       |
| Alaska               | 32.2<br>(19.0 to 49.3) | -32.0<br>(-41.2 to -22.9) | 36.4<br>(7.8 to 101.6)      | -12.0<br>(-14.8 to -9.1)     | 39.2<br>(26.5 to 53.5)  | 12.0<br>(-50.8 to 139.6) | -17.7<br>(-21.5 to -14.4) | -7.8<br>(-14.4 to -0.5)  | 2.6<br>(0.7 to 5.4)      | -0.8<br>(-4.6 to 3.0)     |
| Arizona              | 60.7<br>(40.6 to 88.9) | -48.4<br>(-54.5 to -40.8) | 61.7<br>(22.9 to 164.9)     | -12.6<br>(-15.4 to -9.6)     | 6.5<br>(3.2 to 9.3)     | 7.5<br>(-48.7 to 120.4)  | -15.4<br>(-19.0 to -12.2) | -8.3<br>(-14.7 to -0.7)  | 1.0<br>(-0.5 to 3.3)     | -33.5<br>(-41.2 to -28.0) |
| Arkansas             | 56.0<br>(36.8 to 80.3) | -27.3<br>(-34.6 to -19.4) | 78.6<br>(30.1 to 205.2)     | -12.7<br>(-15.7 to -9.7)     | -0.9<br>(-4.3 to 1.8)   | 3.1<br>(-49.8 to 103.7)  | -15.6<br>(-19.3 to -12.4) | -8.2<br>(-14.3 to -0.6)  | 3.9<br>(2.0 to 5.6)      | -5.0<br>(-8.5 to -2.2)    |
| California           | 54.4<br>(36.6 to 75.6) | -60.5<br>(-67.2 to -51.3) | 42.6<br>(16.3 to 117.8)     | -12.9<br>(-15.8 to -9.7)     | 11.3<br>(8.4 to 14.5)   | 10.6<br>(-43.1 to 124.6) | -16.1<br>(-19.6 to -13.1) | -7.9<br>(-14.2 to -0.6)  | 0.6<br>(-0.8 to 1.9)     | -35.0<br>(-47.9 to -27.6) |
| Colorado             | 45.4<br>(29.9 to 64.8) | -48.2<br>(-54.9 to -40.6) | 31.2<br>(10.7 to 78.0)      | -13.5<br>(-16.3 to -10.6)    | 31.2<br>(19.1 to 47.5)  | 6.7<br>(-49.3 to 130.5)  | -17.2<br>(-20.7 to -13.8) | -7.9<br>(-14.1 to -0.5)  | -0.4<br>(-1.9 to 1.6)    | -11.0<br>(-17.0 to -7.3)  |
| Connecticut          | 53.6<br>(35.6 to 76.2) | -47.2<br>(-54.4 to -38.7) | 83.6<br>(25.9 to 235.6)     | -14.3<br>(-17.2 to -11.3)    | 4.4<br>(1.5 to 7.5)     | 4.6<br>(-49.6 to 109.9)  | -18.3<br>(-21.9 to -15.1) | -7.4<br>(-13.5 to -0.5)  | -0.5<br>(-2.7 to 2.1)    | -9.5<br>(-16.3 to -5.2)   |
| Delaware             | 40.0<br>(25.3 to 57.7) | -36.6<br>(-42.8 to -29.9) | 96.5<br>(32.8 to 247.9)     | -13.1<br>(-16.1 to -10.0)    | 7.3<br>(2.5 to 12.8)    | 8.8<br>(-48.3 to 119.5)  | -17.1<br>(-20.8 to -13.8) | -8.0<br>(-14.3 to -0.6)  | -0.8<br>(-3.1 to 1.9)    | 7.9<br>(4.5 to 12.9)      |
| District of Columbia | 46.3<br>(31.2 to 65.0) | -51.5<br>(-59.6 to -40.3) | 41.1<br>(7.3 to 120.5)      | -15.6<br>(-18.6 to -12.5)    | 9.3<br>(5.8 to 15.9)    | 0.4<br>(-56.0 to 112.8)  | -18.8<br>(-22.4 to -15.2) | -7.3<br>(-13.2 to -0.4)  | -10.3<br>(-13.7 to -5.8) | 5.6<br>(1.1 to 12.2)      |
| Florida              | 51.0<br>(34.9 to 71.4) | -47.6<br>(-54.4 to -39.0) | 100.2<br>(37.9 to 249.5)    | -12.3<br>(-15.3 to -9.2)     | 16.9<br>(12.6 to 21.6)  | 5.4<br>(-46.1 to 117.0)  | -16.8<br>(-20.3 to -13.8) | -8.1<br>(-14.8 to -0.5)  | 3.0<br>(1.3 to 5.0)      | -0.0<br>(-3.5 to 3.9)     |
| Georgia              | 57.5<br>(38.9 to 81.5) | -43.1<br>(-50.4 to -34.1) | 110.5<br>(47.0 to 273.2)    | -13.7<br>(-16.7 to -10.2)    | 15.2<br>(11.7 to 19.8)  | -8.9<br>(-57.4 to 75.8)  | -17.4<br>(-20.9 to -14.1) | -8.3<br>(-14.8 to -0.7)  | 0.7<br>(-0.8 to 2.9)     | -20.5<br>(-28.2 to -15.4) |
| Hawaii               | 47.5<br>(30.3 to 67.1) | -36.2<br>(-43.4 to -27.3) | 64.8<br>(22.8 to 181.6)     | -14.9<br>(-17.9 to -12.0)    | 29.7<br>(17.8 to 44.8)  | 9.7<br>(-47.5 to 114.3)  | -15.1<br>(-18.6 to -11.9) | -8.0<br>(-14.2 to -0.5)  | 2.7<br>(1.1 to 4.5)      | 7.7<br>(4.4 to 13.1)      |
| Idaho                | 61.9<br>(39.7 to 90.2) | -29.5<br>(-38.1 to -20.8) | 71.5<br>(22.5 to 201.7)     | -12.8<br>(-15.9 to -9.8)     | 3.7<br>(-2.1 to 10.8)   | 2.9<br>(-53.0 to 99.2)   | -16.4<br>(-20.0 to -13.3) | -8.3<br>(-14.7 to -0.7)  | 3.5<br>(1.7 to 5.4)      | 4.8<br>(2.5 to 8.2)       |
| Illinois             | 48.6<br>(33.2 to 69.5) | -47.2<br>(-53.1 to -39.3) | 56.0<br>(18.8 to 166.8)     | -13.6<br>(-16.6 to -10.6)    | 16.9<br>(12.1 to 22.1)  | 7.6<br>(-47.7 to 118.1)  | -17.2<br>(-20.8 to -14.4) | -7.9<br>(-14.2 to -0.5)  | -1.1<br>(-2.8 to 1.0)    | 7.1<br>(4.3 to 11.3)      |
| Indiana              | 55.4<br>(37.6 to 77.3) | -25.4<br>(-34.3 to -15.7) | 116.7<br>(45.3 to 265.0)    | -12.6<br>(-15.5 to -9.5)     | 8.5<br>(4.8 to 11.8)    | 4.2<br>(-49.4 to 118.6)  | -17.4<br>(-20.8 to -14.3) | -8.2<br>(-15.0 to -0.5)  | 2.9<br>(1.3 to 5.0)      | -2.4<br>(-5.5 to 0.1)     |
| Iowa                 | 57.2<br>(37.4 to 82.6) | -26.6<br>(-34.2 to -18.3) | 59.4<br>(20.2 to 151.8)     | -13.2<br>(-16.0 to -10.2)    | 40.8<br>(32.6 to 48.5)  | 3.0<br>(-52.7 to 116.9)  | -17.7<br>(-21.0 to -14.4) | -7.9<br>(-13.9 to -0.5)  | 2.4<br>(0.9 to 4.1)      | -8.6<br>(-13.2 to -5.4)   |
| Kansas               | 51.7<br>(34.1 to 73.9) | -29.4<br>(-38.2 to -19.2) | 81.4<br>(27.2 to 235.4)     | -12.7<br>(-15.6 to -9.6)     | 32.7<br>(25.0 to 40.6)  | 4.3<br>(-52.2 to 111.6)  | -17.1<br>(-20.6 to -13.6) | -8.0<br>(-14.2 to -0.5)  | 3.2<br>(1.5 to 5.0)      | -4.9<br>(-8.5 to -2.2)    |
| Kentucky             | 57.0<br>(38.0 to 79.2) | -19.8<br>(-26.8 to -12.9) | 115.8<br>(49.5 to 281.7)    | -12.5<br>(-15.6 to -9.5)     | 11.2<br>(5.2 to 18.6)   | 7.9<br>(-45.9 to 116.6)  | -16.9<br>(-20.7 to -13.9) | -8.2<br>(-14.6 to -0.7)  | 4.5<br>(2.4 to 6.4)      | -4.3<br>(-7.5 to -1.7)    |
| Louisiana            | 52.0<br>(36.8 to 71.6) | -31.9<br>(-38.7 to -24.7) | 108.0<br>(40.0 to 277.3)    | -12.7<br>(-15.5 to -9.5)     | 4.5<br>(1.2 to 7.3)     | 10.6<br>(-47.2 to 132.5) | -15.3<br>(-18.7 to -11.9) | -8.0<br>(-14.2 to -0.5)  | 2.6<br>(1.1 to 4.5)      | -5.3<br>(-9.4 to -2.5)    |
| Maine                | 47.9<br>(32.1 to 68.4) | -29.1<br>(-35.8 to -22.0) | 81.2<br>(26.7 to 217.5)     | -13.1<br>(-16.1 to -10.1)    | 9.5<br>(5.8 to 12.8)    | 10.3<br>(-49.5 to 134.0) | -16.9<br>(-20.4 to -13.5) | -8.2<br>(-14.5 to -0.6)  | 1.8<br>(0.3 to 3.9)      | -19.7<br>(-26.4 to -15.2) |
| Maryland             | 48.1<br>(32.7 to 66.3) | -51.5<br>(-57.2 to -44.7) | 98.9<br>(32.4 to 247.8)     | -13.8<br>(-16.8 to -10.6)    | -9.7<br>(-15.0 to -5.2) | 6.8<br>(-50.4 to 125.4)  | -18.2<br>(-21.8 to -15.1) | -7.7<br>(-13.6 to -0.4)  | -3.6<br>(-6.5 to -0.4)   | -57.3<br>(-69.6 to -48.7) |



|                |                        |                           |                          |                           |                        |                          |                           |                         |                       |                           |
|----------------|------------------------|---------------------------|--------------------------|---------------------------|------------------------|--------------------------|---------------------------|-------------------------|-----------------------|---------------------------|
| Massachusetts  | 52.0<br>(34.0 to 75.4) | -46.0<br>(-52.3 to -38.7) | 45.3<br>(16.0 to 129.6)  | -14.1<br>(-16.9 to -11.1) | 2.5<br>(-1.0 to 6.1)   | 9.0<br>(-49.2 to 123.2)  | -19.6<br>(-23.1 to -16.7) | -7.6<br>(-13.8 to -0.4) | -0.2<br>(-1.6 to 1.3) | -7.2<br>(-13.1 to -3.0)   |
| Michigan       | 41.9<br>(28.3 to 60.0) | -37.3<br>(-43.9 to -30.0) | 114.8<br>(46.6 to 276.7) | -13.4<br>(-16.3 to -10.1) | 13.7<br>(10.0 to 16.8) | 5.6<br>(-49.8 to 112.7)  | -17.5<br>(-21.4 to -14.4) | -8.3<br>(-14.7 to -0.7) | 0.9<br>(-0.5 to 2.9)  | 2.5<br>(-1.2 to 7.0)      |
| Minnesota      | 52.9<br>(36.2 to 74.8) | -37.3<br>(-44.1 to -28.6) | 48.0<br>(19.1 to 140.3)  | -14.0<br>(-17.0 to -10.9) | 23.5<br>(16.2 to 31.9) | 5.6<br>(-48.3 to 115.5)  | -18.3<br>(-21.5 to -15.2) | -7.8<br>(-13.9 to -0.4) | 2.2<br>(0.7 to 4.1)   | -4.1<br>(-8.2 to -0.9)    |
| Mississippi    | 54.3<br>(37.1 to 77.0) | -20.3<br>(-30.3 to -10.3) | 127.2<br>(56.6 to 298.8) | -11.8<br>(-15.1 to -8.6)  | 7.0<br>(4.4 to 10.0)   | 8.8<br>(-45.3 to 115.6)  | -14.8<br>(-18.3 to -11.8) | -8.2<br>(-14.6 to -0.7) | 4.1<br>(2.2 to 6.1)   | 0.1<br>(-2.9 to 2.9)      |
| Missouri       | 54.3<br>(35.8 to 78.0) | -29.6<br>(-36.7 to -22.2) | 111.8<br>(44.2 to 271.5) | -12.6<br>(-15.6 to -9.5)  | 42.8<br>(38.1 to 46.7) | 5.4<br>(-50.3 to 122.2)  | -16.4<br>(-19.7 to -13.1) | -8.1<br>(-14.2 to -0.7) | 2.5<br>(1.0 to 4.6)   | -2.2<br>(-5.5 to 0.7)     |
| Montana        | 53.6<br>(36.9 to 77.2) | -26.5<br>(-35.5 to -16.0) | 40.6<br>(14.9 to 116.1)  | -12.9<br>(-15.5 to -10.1) | 22.0<br>(15.1 to 29.2) | 8.1<br>(-50.3 to 127.1)  | -16.8<br>(-20.3 to -13.4) | -8.0<br>(-14.2 to -0.5) | 0.0<br>(-1.6 to 2.3)  | -5.0<br>(-8.9 to -2.1)    |
| Nebraska       | 57.1<br>(39.5 to 80.5) | -30.1<br>(-37.2 to -22.1) | 88.0<br>(31.4 to 229.0)  | -13.6<br>(-16.4 to -10.6) | 25.2<br>(17.5 to 33.5) | 4.0<br>(-51.2 to 116.2)  | -17.6<br>(-21.1 to -14.4) | -7.8<br>(-13.9 to -0.6) | 2.3<br>(0.9 to 4.3)   | -9.2<br>(-14.2 to -5.8)   |
| Nevada         | 36.7<br>(21.5 to 54.2) | -51.2<br>(-57.7 to -43.7) | 81.1<br>(23.6 to 228.6)  | -12.2<br>(-15.2 to -9.4)  | 14.6<br>(11.7 to 17.9) | 5.9<br>(-51.6 to 122.6)  | -17.6<br>(-21.0 to -14.4) | -8.2<br>(-14.7 to -0.6) | 0.7<br>(-1.0 to 3.1)  | 6.2<br>(2.7 to 10.9)      |
| New Hampshire  | 57.7<br>(38.1 to 83.6) | -37.0<br>(-42.9 to -29.5) | 79.5<br>(25.7 to 210.3)  | -13.0<br>(-16.1 to -10.0) | 2.2<br>(-2.0 to 7.1)   | 14.0<br>(-47.1 to 142.8) | -17.8<br>(-21.3 to -14.5) | -7.8<br>(-14.0 to -0.5) | 0.4<br>(-1.4 to 3.0)  | -3.5<br>(-7.8 to 0.1)     |
| New Jersey     | 48.0<br>(32.4 to 67.8) | -52.5<br>(-59.1 to -44.7) | 75.4<br>(24.4 to 198.9)  | -14.6<br>(-17.5 to -11.6) | 9.2<br>(5.5 to 13.5)   | 3.5<br>(-52.0 to 115.9)  | -18.2<br>(-22.1 to -15.0) | -7.6<br>(-13.8 to -0.4) | -2.4<br>(-4.5 to 0.1) | -2.7<br>(-6.6 to 0.9)     |
| New Mexico     | 68.2<br>(45.6 to 99.7) | -37.5<br>(-45.6 to -29.3) | 74.3<br>(27.3 to 190.2)  | -11.7<br>(-14.7 to -8.6)  | 23.8<br>(19.0 to 29.2) | 10.4<br>(-46.9 to 121.0) | -15.3<br>(-18.8 to -12.0) | -8.2<br>(-14.4 to -0.7) | 3.5<br>(1.6 to 5.6)   | -10.2<br>(-15.7 to -6.5)  |
| New York       | 51.3<br>(34.6 to 72.4) | -51.4<br>(-58.5 to -42.4) | 105.4<br>(42.2 to 262.3) | -14.0<br>(-17.1 to -11.0) | 1.3<br>(-1.3 to 3.9)   | 4.5<br>(-48.4 to 115.5)  | -18.6<br>(-22.1 to -15.6) | -7.8<br>(-14.1 to -0.5) | -2.3<br>(-4.7 to 0.5) | -5.8<br>(-10.6 to -2.4)   |
| North Carolina | 54.1<br>(38.2 to 73.7) | -37.1<br>(-44.6 to -28.8) | 109.2<br>(42.2 to 272.4) | -13.9<br>(-17.1 to -10.6) | 14.2<br>(9.2 to 19.6)  | 6.9<br>(-46.7 to 105.5)  | -17.4<br>(-20.9 to -14.3) | -8.2<br>(-14.3 to -0.6) | 1.6<br>(0.1 to 3.6)   | -6.5<br>(-10.5 to -3.6)   |
| North Dakota   | 60.8<br>(41.8 to 87.7) | -19.4<br>(-29.4 to -8.6)  | 68.6<br>(23.9 to 190.9)  | -13.8<br>(-16.6 to -10.9) | 71.3<br>(58.2 to 86.3) | 7.1<br>(-49.9 to 118.2)  | -17.7<br>(-21.6 to -14.4) | -7.5<br>(-13.6 to -0.4) | 1.9<br>(0.4 to 3.6)   | -24.8<br>(-33.8 to -19.2) |
| Ohio           | 49.6<br>(34.0 to 70.6) | -28.1<br>(-35.0 to -20.5) | 118.3<br>(50.1 to 297.7) | -12.5<br>(-15.5 to -9.3)  | 12.1<br>(8.3 to 15.6)  | 9.2<br>(-49.2 to 118.8)  | -17.1<br>(-20.8 to -13.9) | -8.1<br>(-14.5 to -0.5) | 2.2<br>(0.8 to 4.5)   | -37.2<br>(-50.5 to -29.4) |
| Oklahoma       | 69.3<br>(47.7 to 99.6) | -26.6<br>(-33.5 to -19.3) | 118.0<br>(50.9 to 292.2) | -13.2<br>(-15.9 to -10.0) | 12.1<br>(8.2 to 16.6)  | 1.8<br>(-49.9 to 113.6)  | -15.1<br>(-18.6 to -12.1) | -8.0<br>(-14.0 to -0.6) | 3.7<br>(1.8 to 5.6)   | -5.2<br>(-9.2 to -2.4)    |
| Oregon         | 48.1<br>(33.0 to 67.0) | -44.0<br>(-50.5 to -36.0) | 40.9<br>(14.1 to 110.0)  | -13.7<br>(-16.8 to -10.5) | -0.2<br>(-3.8 to 3.0)  | 5.5<br>(-47.6 to 119.8)  | -16.9<br>(-20.4 to -13.7) | -8.1<br>(-14.4 to -0.6) | 1.9<br>(0.6 to 3.8)   | -8.1<br>(-12.7 to -4.8)   |
| Pennsylvania   | 46.4<br>(28.9 to 66.0) | -38.6<br>(-44.9 to -31.4) | 1.7<br>(-36.4 to 50.1)   | -13.5<br>(-16.6 to -10.4) | 12.9<br>(9.4 to 16.5)  | 6.9<br>(-48.0 to 113.8)  | -17.5<br>(-21.3 to -14.3) | -7.9<br>(-14.2 to -0.6) | -1.2<br>(-3.0 to 0.9) | -7.8<br>(-13.2 to -4.5)   |
| Rhode Island   | 58.2<br>(40.4 to 78.5) | -37.7<br>(-46.2 to -28.8) | 87.5<br>(32.7 to 230.9)  | -13.2<br>(-16.4 to -10.2) | 2.9<br>(0.7 to 5.0)    | 7.1<br>(-49.2 to 123.8)  | -16.9<br>(-20.6 to -13.7) | -7.9<br>(-14.2 to -0.5) | -0.4<br>(-2.1 to 1.9) | 0.6<br>(-2.8 to 4.5)      |
| South Carolina | 59.7<br>(41.9 to 83.9) | -32.1<br>(-40.6 to -22.7) | 123.2<br>(54.8 to 304.8) | -13.1<br>(-16.2 to -10.0) | 2.1<br>(-0.8 to 4.6)   | 9.3<br>(-46.5 to 126.1)  | -16.4<br>(-19.8 to -13.4) | -8.2<br>(-14.4 to -0.6) | 2.3<br>(0.8 to 4.6)   | 4.1<br>(1.5 to 7.4)       |
| South Dakota   | 59.0<br>(38.7 to 88.1) | -21.5<br>(-31.4 to -10.1) | 51.1<br>(21.6 to 129.6)  | -13.2<br>(-16.1 to -10.1) | 75.4<br>(60.2 to 92.0) | 4.6<br>(-49.4 to 131.0)  | -17.3<br>(-20.8 to -14.1) | -7.7<br>(-14.0 to -0.4) | 1.9<br>(0.6 to 3.9)   | -38.8<br>(-52.8 to -30.6) |
| Tennessee      | 64.3<br>(46.4 to 88.2) | -25.1<br>(-32.5 to -17.6) | 110.4<br>(44.7 to 269.2) | -12.8<br>(-15.9 to -9.8)  | 6.6<br>(3.2 to 9.7)    | 5.9<br>(-47.4 to 105.7)  | -15.9<br>(-19.3 to -12.8) | -8.0<br>(-14.6 to -0.5) | 3.2<br>(1.5 to 5.1)   | -8.1<br>(-12.2 to -5.2)   |
| Texas          | 62.5<br>(42.9 to 86.9) | -51.2<br>(-57.7 to -42.5) | 95.1<br>(34.5 to 251.3)  | -13.4<br>(-16.5 to -10.3) | 19.6<br>(12.9 to 27.1) | 6.9<br>(-49.5 to 121.1)  | -18.0<br>(-21.7 to -14.9) | -8.0<br>(-14.0 to -0.6) | 3.8<br>(2.1 to 5.1)   | -10.3<br>(-15.9 to -7.0)  |

|               |                |                  |                 |                  |                 |                  |                  |                 |               |                 |
|---------------|----------------|------------------|-----------------|------------------|-----------------|------------------|------------------|-----------------|---------------|-----------------|
|               | 59.4           | -34.9            | 72.4            | -12.9            | 1.4             | 3.8              | -16.8            | -8.2            | 2.1           | -5.7            |
| Utah          | (40.6 to 84.1) | (-44.5 to -23.2) | (21.3 to 199.0) | (-15.8 to -9.9)  | (-1.9 to 4.2)   | (-45.6 to 96.4)  | (-20.5 to -13.4) | (-14.5 to -0.6) | (0.7 to 3.7)  | (-9.8 to -2.7)  |
|               | 47.8           | -29.8            | 38.6            | -12.9            | 5.3             | 14.3             | -17.2            | -7.8            | -2.4          | -2.3            |
| Vermont       | (32.9 to 69.8) | (-37.5 to -21.3) | (15.6 to 103.5) | (-16.0 to -10.0) | (-2.3 to 14.6)  | (-46.9 to 146.4) | (-20.6 to -14.0) | (-14.3 to -0.5) | (-5.0 to 0.6) | (-6.1 to 0.7)   |
|               | 54.3           | -44.4            | 96.8            | -14.4            | 13.9            | 9.0              | -17.9            | -7.8            | 1.0           | -6.6            |
| Virginia      | (37.1 to 76.3) | (-50.3 to -37.6) | (33.7 to 247.8) | (-17.5 to -11.5) | (9.1 to 19.3)   | (-46.6 to 123.0) | (-21.4 to -14.8) | (-13.9 to -0.5) | (-0.6 to 3.3) | (-11.2 to -3.1) |
|               | 56.9           | -47.9            | 44.8            | -13.6            | 16.0            | 5.2              | -18.0            | -7.9            | 1.6           | -7.7            |
| Washington    | (39.5 to 79.7) | (-54.2 to -40.1) | (18.3 to 113.4) | (-16.4 to -10.5) | (13.3 to 18.8)  | (-48.7 to 116.7) | (-21.8 to -15.0) | (-14.0 to -0.5) | (0.3 to 3.6)  | (-12.6 to -4.4) |
|               | 53.7           | -11.2            | 129.2           | -13.1            | 10.3            | 5.4              | -16.7            | -8.3            | 5.2           | -7.0            |
| West Virginia | (38.4 to 75.4) | (-18.6 to -2.3)  | (51.7 to 301.8) | (-16.2 to -10.1) | (6.5 to 13.7)   | (-47.1 to 100.6) | (-20.2 to -13.6) | (-14.6 to -0.7) | (2.8 to 7.2)  | (-11.3 to -4.1) |
|               | 52.3           | -32.6            | 53.2            | -13.1            | 15.4            | 5.6              | -17.5            | -8.0            | 2.4           | -4.8            |
| Wisconsin     | (36.7 to 72.8) | (-39.8 to -24.4) | (15.7 to 156.5) | (-16.0 to -9.8)  | (10.3 to 21.6)  | (-50.3 to 114.4) | (-21.3 to -14.0) | (-14.3 to -0.5) | (0.9 to 4.3)  | (-8.9 to -1.5)  |
|               | 52.3           | -31.9            | 41.1            | -13.7            | 116.0           | 10.3             | -17.7            | -7.5            | 1.2           | -3.9            |
| Wyoming       | (34.4 to 76.6) | (-39.9 to -22.6) | (16.8 to 109.1) | (-16.6 to -10.8) | (91.2 to 141.9) | (-49.4 to 146.5) | (-21.3 to -14.5) | (-13.8 to -0.4) | (-0.2 to 3.4) | (-7.7 to -0.8)  |

Appendix Table 11: Socio-Demographic Index values for all estimated GBD 2016 locations, 1980–2016

| Location                                         | 1980  | 1981  | 1982  | 1983  | 1984  | 1985  | 1986  | 1987  | 1988  | 1989  | 1990  | 1991  | 1992  | 1993  | 1994  | 1995  | 1996  | 1997  | 1998  | 1999  | 2000  | 2001  | 2002  | 2003  | 2004  | 2005  | 2006  | 2007  | 2008  | 2009  | 2010  | 2011  | 2012  | 2013  | 2014  | 2015  | 2016  |       |
|--------------------------------------------------|-------|-------|-------|-------|-------|-------|-------|-------|-------|-------|-------|-------|-------|-------|-------|-------|-------|-------|-------|-------|-------|-------|-------|-------|-------|-------|-------|-------|-------|-------|-------|-------|-------|-------|-------|-------|-------|-------|
| Global                                           | 0.526 | 0.531 | 0.535 | 0.54  | 0.544 | 0.549 | 0.554 | 0.559 | 0.564 | 0.569 | 0.575 | 0.58  | 0.586 | 0.591 | 0.596 | 0.6   | 0.605 | 0.609 | 0.614 | 0.618 | 0.622 | 0.626 | 0.63  | 0.634 | 0.639 | 0.643 | 0.648 | 0.652 | 0.657 | 0.662 | 0.666 | 0.671 | 0.676 | 0.681 | 0.686 | 0.691 | 0.696 |       |
| Southeast Asia, East Asia, and Oceania           | 0.438 | 0.445 | 0.453 | 0.461 | 0.47  | 0.478 | 0.486 | 0.495 | 0.504 | 0.512 | 0.521 | 0.53  | 0.539 | 0.548 | 0.556 | 0.565 | 0.573 | 0.581 | 0.587 | 0.594 | 0.6   | 0.606 | 0.612 | 0.619 | 0.626 | 0.633 | 0.641 | 0.65  | 0.658 | 0.666 | 0.675 | 0.683 | 0.691 | 0.699 | 0.706 | 0.712 | 0.719 |       |
| East Asia                                        | 0.436 | 0.443 | 0.45  | 0.458 | 0.467 | 0.477 | 0.486 | 0.496 | 0.506 | 0.515 | 0.524 | 0.533 | 0.543 | 0.552 | 0.562 | 0.571 | 0.58  | 0.588 | 0.594 | 0.601 | 0.608 | 0.614 | 0.621 | 0.629 | 0.636 | 0.644 | 0.653 | 0.661 | 0.67  | 0.678 | 0.686 | 0.694 | 0.701 | 0.709 | 0.715 | 0.722 | 0.729 |       |
| China                                            | 0.42  | 0.428 | 0.435 | 0.444 | 0.453 | 0.463 | 0.473 | 0.483 | 0.494 | 0.503 | 0.512 | 0.521 | 0.531 | 0.542 | 0.552 | 0.562 | 0.57  | 0.578 | 0.585 | 0.592 | 0.6   | 0.607 | 0.614 | 0.622 | 0.63  | 0.638 | 0.647 | 0.657 | 0.665 | 0.674 | 0.682 | 0.691 | 0.698 | 0.706 | 0.713 | 0.72  | 0.727 |       |
| North Korea                                      | 0.471 | 0.476 | 0.48  | 0.485 | 0.488 | 0.491 | 0.494 | 0.497 | 0.499 | 0.502 | 0.505 | 0.508 | 0.51  | 0.511 | 0.511 | 0.516 | 0.501 | 0.495 | 0.489 | 0.483 | 0.478 | 0.474 | 0.47  | 0.468 | 0.463 | 0.469 | 0.47  | 0.471 | 0.473 | 0.474 | 0.476 | 0.478 | 0.481 | 0.484 | 0.488 | 0.491 | 0.494 |       |
| Taiwan (province of China)                       | 0.636 | 0.645 | 0.657 | 0.669 | 0.681 | 0.695 | 0.706 | 0.71  | 0.719 | 0.727 | 0.734 | 0.743 | 0.751 | 0.759 | 0.766 | 0.775 | 0.785 | 0.798 | 0.8   | 0.808 | 0.813 | 0.82  | 0.824 | 0.829 | 0.833 | 0.837 | 0.842 | 0.845 | 0.849 | 0.853 | 0.858 | 0.864 | 0.868 | 0.871 | 0.875 | 0.878 | 0.881 | 0.885 |
| Hong Kong Special Administrative Region of China | 0.633 | 0.643 | 0.652 | 0.662 | 0.671 | 0.677 | 0.682 | 0.688 | 0.694 | 0.699 | 0.704 | 0.708 | 0.713 | 0.718 | 0.723 | 0.727 | 0.731 | 0.734 | 0.737 | 0.74  | 0.743 | 0.746 | 0.749 | 0.752 | 0.756 | 0.761 | 0.765 | 0.77  | 0.775 | 0.779 | 0.783 | 0.787 | 0.791 | 0.795 | 0.798 | 0.801 | 0.805 |       |
| Macao Special Administrative Region of China     | 0.638 | 0.646 | 0.654 | 0.66  | 0.667 | 0.672 | 0.678 | 0.684 | 0.689 | 0.695 | 0.7   | 0.705 | 0.711 | 0.716 | 0.721 | 0.725 | 0.728 | 0.731 | 0.732 | 0.734 | 0.735 | 0.738 | 0.742 | 0.747 | 0.754 | 0.761 | 0.768 | 0.776 | 0.784 | 0.789 | 0.793 | 0.796 | 0.799 | 0.802 | 0.806 | 0.809 | 0.811 |       |
| China (without Hong Kong and Macao)              | 0.413 | 0.42  | 0.428 | 0.436 | 0.446 | 0.456 | 0.467 | 0.477 | 0.487 | 0.497 | 0.506 | 0.515 | 0.525 | 0.536 | 0.546 | 0.556 | 0.565 | 0.574 | 0.581 | 0.588 | 0.596 | 0.603 | 0.611 | 0.619 | 0.627 | 0.635 | 0.645 | 0.654 | 0.663 | 0.672 | 0.68  | 0.689 | 0.697 | 0.704 | 0.712 | 0.718 | 0.725 |       |
| Anhui                                            | 0.353 | 0.36  | 0.367 | 0.375 | 0.385 | 0.396 | 0.406 | 0.417 | 0.427 | 0.437 | 0.446 | 0.455 | 0.464 | 0.474 | 0.483 | 0.493 | 0.502 | 0.51  | 0.518 | 0.525 | 0.532 | 0.538 | 0.545 | 0.552 | 0.559 | 0.567 | 0.576 | 0.585 | 0.594 | 0.603 | 0.611 | 0.619 | 0.626 | 0.633 | 0.639 | 0.645 | 0.651 |       |
| Beijing                                          | 0.606 | 0.612 | 0.618 | 0.624 | 0.631 | 0.638 | 0.645 | 0.653 | 0.659 | 0.665 | 0.671 | 0.676 | 0.682 | 0.689 | 0.695 | 0.702 | 0.709 | 0.715 | 0.721 | 0.726 | 0.732 | 0.738 | 0.744 | 0.75  | 0.757 | 0.764 | 0.772 | 0.78  | 0.787 | 0.795 | 0.802 | 0.809 | 0.816 | 0.823 | 0.829 | 0.835 | 0.842 |       |
| Chongqing                                        | 0.367 | 0.375 | 0.384 | 0.394 | 0.407 | 0.419 | 0.431 | 0.443 | 0.454 | 0.464 | 0.474 | 0.485 | 0.496 | 0.507 | 0.519 | 0.53  | 0.539 | 0.549 | 0.557 | 0.565 | 0.574 | 0.582 | 0.591 | 0.599 | 0.607 | 0.616 | 0.625 | 0.635 | 0.643 | 0.652 | 0.66  | 0.668 | 0.675 | 0.682 | 0.689 | 0.694 | 0.7   |       |
| Fujian                                           | 0.372 | 0.378 | 0.386 | 0.396 | 0.408 | 0.42  | 0.433 | 0.445 | 0.458 | 0.469 | 0.48  | 0.492 | 0.504 | 0.518 | 0.531 | 0.544 | 0.555 | 0.564 | 0.573 | 0.581 | 0.59  | 0.598 | 0.606 | 0.615 | 0.623 | 0.632 | 0.642 | 0.652 | 0.662 | 0.671 | 0.68  | 0.689 | 0.698 | 0.706 | 0.713 | 0.72  | 0.727 |       |
| Gansu                                            | 0.353 | 0.358 | 0.364 | 0.372 | 0.382 | 0.391 | 0.401 | 0.411 | 0.421 | 0.431 | 0.438 | 0.447 | 0.456 | 0.465 | 0.473 | 0.482 | 0.49  | 0.498 | 0.506 | 0.513 | 0.52  | 0.526 | 0.533 | 0.539 | 0.546 | 0.553 | 0.56  | 0.568 | 0.575 | 0.583 | 0.59  | 0.597 | 0.604 | 0.61  | 0.616 | 0.622 | 0.628 |       |
| Guangdong                                        | 0.444 | 0.451 | 0.458 | 0.467 | 0.476 | 0.487 | 0.497 | 0.507 | 0.518 | 0.527 | 0.536 | 0.546 | 0.557 | 0.567 | 0.578 | 0.588 | 0.598 | 0.607 | 0.615 | 0.623 | 0.632 | 0.64  | 0.648 | 0.658 | 0.667 | 0.678 | 0.688 | 0.7   | 0.71  | 0.72  | 0.729 | 0.737 | 0.745 | 0.753 | 0.761 | 0.768 | 0.775 |       |
| Guangxi                                          | 0.361 | 0.369 | 0.376 | 0.385 | 0.395 | 0.406 | 0.417 | 0.428 | 0.439 | 0.449 | 0.458 | 0.468 | 0.479 | 0.49  | 0.501 | 0.511 | 0.521 | 0.531 | 0.539 | 0.547 | 0.555 | 0.562 | 0.569 | 0.577 | 0.585 | 0.594 | 0.603 | 0.613 | 0.622 | 0.632 | 0.641 | 0.651 | 0.661 | 0.67  | 0.679 | 0.686 | 0.693 |       |
| Guizhou                                          | 0.279 | 0.287 | 0.295 | 0.303 | 0.314 | 0.325 | 0.336 | 0.347 | 0.358 | 0.368 | 0.376 | 0.385 | 0.394 | 0.403 | 0.413 | 0.422 | 0.431 | 0.439 | 0.446 | 0.454 | 0.462 | 0.469 | 0.477 | 0.485 | 0.494 | 0.503 | 0.512 | 0.522 | 0.531 | 0.54  | 0.55  | 0.559 | 0.567 | 0.575 | 0.581 | 0.587 | 0.594 |       |
| Hainan                                           | 0.438 | 0.443 | 0.448 | 0.454 | 0.462 | 0.47  | 0.478 | 0.486 | 0.495 | 0.502 | 0.511 | 0.52  | 0.529 | 0.539 | 0.549 | 0.558 | 0.566 | 0.575 | 0.582 | 0.59  | 0.597 | 0.604 | 0.611 | 0.618 | 0.625 | 0.632 | 0.64  | 0.648 | 0.656 | 0.665 | 0.672 | 0.68  | 0.686 | 0.693 | 0.699 | 0.705 | 0.711 |       |
| Hebei                                            | 0.42  | 0.427 | 0.435 | 0.443 | 0.452 | 0.462 | 0.472 | 0.482 | 0.492 | 0.501 | 0.509 | 0.517 | 0.527 | 0.537 | 0.547 | 0.556 | 0.565 | 0.573 | 0.581 | 0.588 | 0.596 | 0.603 | 0.611 | 0.619 | 0.627 | 0.635 | 0.644 | 0.654 | 0.662 | 0.671 | 0.679 | 0.687 | 0.695 | 0.702 | 0.709 | 0.716 | 0.722 |       |
| Heilongjiang                                     | 0.477 | 0.482 | 0.488 | 0.495 | 0.504 | 0.513 | 0.522 | 0.531 | 0.54  | 0.548 | 0.557 | 0.566 | 0.575 | 0.582 | 0.588 | 0.594 | 0.6   | 0.606 | 0.611 | 0.617 | 0.623 | 0.628 | 0.634 | 0.639 | 0.644 | 0.649 | 0.655 | 0.662 | 0.668 | 0.674 | 0.679 | 0.685 | 0.69  | 0.695 | 0.7   | 0.704 | 0.709 |       |
| Henan                                            | 0.368 | 0.375 | 0.384 | 0.394 | 0.405 | 0.417 | 0.429 | 0.441 | 0.453 | 0.463 | 0.471 | 0.481 | 0.491 | 0.502 | 0.513 | 0.525 | 0.535 | 0.545 | 0.554 | 0.562 | 0.57  | 0.578 | 0.587 | 0.595 | 0.604 | 0.613 | 0.623 | 0.633 | 0.642 | 0.652 | 0.661 | 0.67  | 0.678 | 0.685 | 0.693 | 0.699 | 0.706 |       |
| Hubei                                            | 0.407 | 0.415 | 0.423 | 0.432 | 0.442 | 0.452 | 0.463 | 0.474 | 0.484 | 0.494 | 0.504 | 0.514 | 0.524 | 0.535 | 0.545 | 0.553 | 0.561 | 0.569 | 0.576 | 0.583 | 0.59  | 0.597 | 0.604 | 0.611 | 0.618 | 0.626 | 0.635 | 0.643 | 0.651 | 0.659 | 0.667 | 0.674 | 0.681 | 0.688 | 0.694 | 0.7   | 0.706 |       |
| Hunan                                            | 0.383 | 0.391 | 0.399 | 0.409 | 0.42  | 0.431 | 0.442 | 0.454 | 0.465 | 0.476 | 0.485 | 0.495 | 0.505 | 0.516 | 0.526 | 0.536 | 0.546 | 0.555 | 0.562 | 0.569 | 0.576 | 0.582 | 0.59  | 0.597 | 0.605 | 0.613 | 0.621 | 0.63  | 0.639 | 0.647 | 0.655 | 0.663 | 0.67  | 0.678 | 0.684 | 0.691 | 0.697 |       |
| Inner Mongolia                                   | 0.407 | 0.413 | 0.422 | 0.431 | 0.444 | 0.456 | 0.468 | 0.48  | 0.492 | 0.502 | 0.512 | 0.522 | 0.534 | 0.545 | 0.556 | 0.566 | 0.575 | 0.584 | 0.593 | 0.602 | 0.61  | 0.618 | 0.627 | 0.634 | 0.641 | 0.648 | 0.656 | 0.664 | 0.672 | 0.68  | 0.688 | 0.696 | 0.703 | 0.71  | 0.716 | 0.722 | 0.728 |       |
| Jiangsu                                          | 0.443 | 0.451 | 0.459 | 0.468 | 0.479 | 0.489 | 0.5   | 0.51  | 0.521 | 0.53  | 0.539 | 0.548 | 0.557 | 0.565 | 0.573 | 0.582 | 0.591 | 0.599 | 0.607 | 0.614 | 0.621 | 0.629 | 0.637 | 0.646 | 0.655 | 0.664 | 0.674 | 0.684 | 0.693 | 0.702 | 0.711 | 0.72  | 0.728 | 0.736 | 0.743 | 0.75  | 0.757 |       |
| Jiangxi                                          | 0.347 | 0.354 | 0.362 | 0.371 | 0.382 | 0.394 | 0.405 | 0.416 | 0.428 | 0.439 | 0.449 | 0.458 | 0.469 | 0.48  | 0.49  | 0.5   | 0.509 | 0.518 | 0.526 | 0.534 | 0.542 | 0.549 | 0.557 | 0.565 | 0.573 | 0.581 | 0.59  | 0.599 | 0.607 | 0.615 | 0.622 | 0.629 | 0.636 | 0.643 | 0.649 | 0.655 | 0.662 |       |
| Jilin                                            | 0.451 | 0.457 | 0.464 | 0.471 | 0.48  | 0.49  | 0.5   | 0.509 | 0.519 | 0.528 | 0.537 | 0.547 | 0.557 | 0.564 | 0.571 | 0.579 | 0.586 | 0.594 | 0.6   | 0.607 | 0.613 | 0.62  | 0.626 | 0.633 | 0.639 | 0.646 | 0.653 | 0.661 | 0.668 | 0.676 | 0.683 | 0.689 | 0.696 | 0.702 | 0.708 | 0.713 | 0.719 |       |
| Liaoning                                         | 0.521 | 0.527 | 0.533 | 0.539 | 0.547 | 0.555 | 0.563 | 0.571 | 0.579 | 0.587 | 0.592 | 0.597 | 0.602 | 0.608 | 0.614 | 0.621 | 0.627 | 0.634 | 0.639 | 0.645 | 0.651 | 0.656 | 0.662 | 0.668 | 0.674 | 0.68  | 0.686 | 0.693 | 0.7   | 0.707 | 0.713 | 0.719 | 0.725 | 0.73  | 0.736 | 0.741 | 0.746 |       |
| Ningxia                                          | 0.37  | 0.375 | 0.382 | 0.39  | 0.398 | 0.408 | 0.418 | 0.429 | 0.44  | 0.45  | 0.46  | 0.469 | 0.479 | 0.489 | 0.498 | 0.507 | 0.515 | 0.523 | 0.531 | 0.538 | 0.545 | 0.552 | 0.559 | 0.566 | 0.574 | 0.583 | 0.592 | 0.601 | 0.61  | 0.617 | 0.624 | 0.632 | 0.639 | 0.645 | 0.652 | 0.658 | 0.664 |       |
| Qinghai                                          | 0.354 | 0.36  | 0.366 | 0.375 | 0.386 | 0.397 | 0.408 | 0.42  | 0.431 | 0.442 | 0.452 | 0.462 | 0.473 | 0.482 | 0.492 | 0.501 | 0.509 | 0.517 | 0.524 | 0.531 | 0.537 | 0.544 | 0.55  | 0.557 | 0.564 | 0.571 | 0.578 | 0.586 | 0.593 | 0.6   | 0.607 | 0.614 | 0.622 | 0.627 | 0.633 | 0.639 | 0.645 |       |
| Shaanxi                                          | 0.385 | 0.392 | 0.4   | 0.409 | 0.419 | 0.43  | 0.441 | 0.451 | 0.462 | 0.471 | 0.48  | 0.49  | 0.501 | 0.512 | 0.522 | 0.532 | 0.54  | 0.549 | 0.556 | 0.564 | 0.571 | 0.579 | 0.587 | 0.594 | 0.602 | 0.61  | 0.619 | 0.628 | 0.637 | 0.645 | 0.654 | 0.662 | 0.67  | 0.677 | 0.683 | 0.689 | 0.696 |       |
| Shandong                                         | 0.413 | 0.421 | 0.431 | 0.44  | 0.451 | 0.463 | 0.474 | 0.485 | 0.497 | 0.507 | 0.516 | 0.525 | 0.535 | 0.544 | 0.553 | 0.563 |       |       |       |       |       |       |       |       |       |       |       |       |       |       |       |       |       |       |       |       |       |       |

Appendix Table 11: Socio-Demographic Index values for all estimated GBD 2016 locations, 1980–2016

| Location            | 1980  | 1981  | 1982  | 1983  | 1984  | 1985  | 1986  | 1987  | 1988  | 1989  | 1990  | 1991  | 1992  | 1993  | 1994  | 1995  | 1996  | 1997  | 1998  | 1999  | 2000  | 2001  | 2002  | 2003  | 2004  | 2005  | 2006  | 2007  | 2008  | 2009  | 2010  | 2011  | 2012  | 2013  | 2014  | 2015  | 2016  |
|---------------------|-------|-------|-------|-------|-------|-------|-------|-------|-------|-------|-------|-------|-------|-------|-------|-------|-------|-------|-------|-------|-------|-------|-------|-------|-------|-------|-------|-------|-------|-------|-------|-------|-------|-------|-------|-------|-------|
| Sumatera Barat      | 0.387 | 0.398 | 0.408 | 0.418 | 0.429 | 0.439 | 0.448 | 0.458 | 0.466 | 0.475 | 0.483 | 0.491 | 0.498 | 0.506 | 0.513 | 0.519 | 0.526 | 0.532 | 0.536 | 0.541 | 0.546 | 0.551 | 0.557 | 0.563 | 0.568 | 0.574 | 0.58  | 0.587 | 0.594 | 0.602 | 0.611 | 0.62  | 0.629 | 0.638 | 0.647 | 0.656 | 0.663 |
| Riau                | 0.438 | 0.451 | 0.465 | 0.479 | 0.494 | 0.507 | 0.521 | 0.533 | 0.545 | 0.556 | 0.567 | 0.577 | 0.586 | 0.595 | 0.602 | 0.609 | 0.616 | 0.622 | 0.626 | 0.632 | 0.639 | 0.645 | 0.651 | 0.656 | 0.662 | 0.668 | 0.675 | 0.682 | 0.688 | 0.695 | 0.702 | 0.711 | 0.72  | 0.728 | 0.737 | 0.744 |       |
| Jambi               | 0.355 | 0.366 | 0.376 | 0.387 | 0.398 | 0.408 | 0.418 | 0.428 | 0.438 | 0.447 | 0.456 | 0.465 | 0.474 | 0.483 | 0.492 | 0.501 | 0.51  | 0.519 | 0.526 | 0.532 | 0.537 | 0.542 | 0.549 | 0.555 | 0.562 | 0.568 | 0.575 | 0.583 | 0.592 | 0.6   | 0.61  | 0.62  | 0.63  | 0.64  | 0.649 | 0.659 | 0.667 |
| Sumatera Selatan    | 0.416 | 0.426 | 0.436 | 0.446 | 0.456 | 0.466 | 0.476 | 0.485 | 0.495 | 0.503 | 0.512 | 0.521 | 0.53  | 0.537 | 0.544 | 0.55  | 0.557 | 0.563 | 0.569 | 0.572 | 0.575 | 0.578 | 0.581 | 0.584 | 0.587 | 0.592 | 0.596 | 0.602 | 0.608 | 0.615 | 0.622 | 0.629 | 0.638 | 0.646 | 0.655 | 0.663 | 0.671 |
| Bengkulu            | 0.348 | 0.359 | 0.369 | 0.38  | 0.391 | 0.402 | 0.413 | 0.423 | 0.433 | 0.443 | 0.452 | 0.462 | 0.471 | 0.48  | 0.489 | 0.498 | 0.507 | 0.515 | 0.52  | 0.526 | 0.53  | 0.534 | 0.538 | 0.543 | 0.548 | 0.554 | 0.561 | 0.567 | 0.575 | 0.582 | 0.589 | 0.598 | 0.607 | 0.616 | 0.625 | 0.634 | 0.641 |
| Lampung             | 0.344 | 0.355 | 0.365 | 0.376 | 0.386 | 0.396 | 0.405 | 0.414 | 0.423 | 0.432 | 0.441 | 0.449 | 0.458 | 0.467 | 0.476 | 0.485 | 0.494 | 0.503 | 0.512 | 0.52  | 0.526 | 0.532 | 0.536 | 0.54  | 0.544 | 0.549 | 0.555 | 0.562 | 0.571 | 0.581 | 0.591 | 0.601 | 0.611 | 0.621 | 0.631 | 0.641 | 0.651 |
| Bangka Belitung     | 0.398 | 0.408 | 0.417 | 0.427 | 0.437 | 0.447 | 0.456 | 0.466 | 0.475 | 0.483 | 0.492 | 0.499 | 0.507 | 0.514 | 0.521 | 0.528 | 0.535 | 0.542 | 0.548 | 0.553 | 0.557 | 0.562 | 0.567 | 0.572 | 0.578 | 0.584 | 0.589 | 0.595 | 0.602 | 0.608 | 0.615 | 0.623 | 0.631 | 0.639 | 0.647 | 0.656 | 0.663 |
| Kepulauan Riau      | 0.439 | 0.453 | 0.467 | 0.482 | 0.498 | 0.513 | 0.528 | 0.542 | 0.555 | 0.568 | 0.581 | 0.593 | 0.606 | 0.617 | 0.626 | 0.635 | 0.644 | 0.653 | 0.659 | 0.665 | 0.669 | 0.672 | 0.675 | 0.678 | 0.681 | 0.684 | 0.688 | 0.692 | 0.698 | 0.704 | 0.711 | 0.718 | 0.726 | 0.734 | 0.742 | 0.751 | 0.758 |
| Kalimantan Utara    | 0.455 | 0.469 | 0.483 | 0.498 | 0.513 | 0.527 | 0.541 | 0.554 | 0.566 | 0.577 | 0.588 | 0.599 | 0.61  | 0.62  | 0.63  | 0.64  | 0.649 | 0.658 | 0.666 | 0.673 | 0.679 | 0.684 | 0.689 | 0.693 | 0.698 | 0.704 | 0.709 | 0.713 | 0.72  | 0.726 | 0.731 | 0.739 | 0.746 | 0.754 | 0.761 | 0.769 | 0.775 |
| Jakarta             | 0.554 | 0.566 | 0.576 | 0.587 | 0.599 | 0.609 | 0.619 | 0.629 | 0.638 | 0.646 | 0.654 | 0.663 | 0.67  | 0.68  | 0.689 | 0.697 | 0.706 | 0.714 | 0.72  | 0.725 | 0.73  | 0.735 | 0.74  | 0.745 | 0.75  | 0.754 | 0.759 | 0.764 | 0.769 | 0.775 | 0.782 | 0.789 | 0.795 | 0.803 | 0.81  | 0.818 | 0.824 |
| Jawa Barat          | 0.406 | 0.416 | 0.426 | 0.436 | 0.446 | 0.456 | 0.465 | 0.474 | 0.481 | 0.488 | 0.496 | 0.504 | 0.512 | 0.52  | 0.529 | 0.538 | 0.546 | 0.554 | 0.56  | 0.563 | 0.566 | 0.569 | 0.571 | 0.575 | 0.578 | 0.582 | 0.587 | 0.593 | 0.6   | 0.608 | 0.615 | 0.623 | 0.631 | 0.639 | 0.648 | 0.656 | 0.663 |
| Jawa Tengah         | 0.363 | 0.374 | 0.384 | 0.395 | 0.405 | 0.415 | 0.425 | 0.433 | 0.442 | 0.449 | 0.457 | 0.466 | 0.476 | 0.483 | 0.492 | 0.5   | 0.508 | 0.516 | 0.526 | 0.529 | 0.533 | 0.536 | 0.54  | 0.545 | 0.549 | 0.555 | 0.561 | 0.568 | 0.575 | 0.582 | 0.591 | 0.599 | 0.608 | 0.616 | 0.625 | 0.632 |       |
| Yogyakarta          | 0.393 | 0.405 | 0.417 | 0.429 | 0.44  | 0.451 | 0.462 | 0.472 | 0.481 | 0.49  | 0.499 | 0.508 | 0.517 | 0.53  | 0.543 | 0.554 | 0.563 | 0.572 | 0.576 | 0.58  | 0.584 | 0.587 | 0.591 | 0.595 | 0.599 | 0.603 | 0.607 | 0.612 | 0.618 | 0.624 | 0.631 | 0.639 | 0.647 | 0.655 | 0.663 | 0.672 | 0.679 |
| Jawa Timur          | 0.384 | 0.395 | 0.406 | 0.416 | 0.427 | 0.437 | 0.447 | 0.456 | 0.465 | 0.473 | 0.482 | 0.49  | 0.498 | 0.506 | 0.514 | 0.522 | 0.53  | 0.538 | 0.545 | 0.55  | 0.556 | 0.562 | 0.567 | 0.573 | 0.579 | 0.584 | 0.59  | 0.596 | 0.603 | 0.61  | 0.617 | 0.625 | 0.633 | 0.642 | 0.651 | 0.659 | 0.667 |
| Banten              | 0.398 | 0.408 | 0.418 | 0.428 | 0.439 | 0.449 | 0.459 | 0.469 | 0.478 | 0.486 | 0.495 | 0.504 | 0.513 | 0.521 | 0.529 | 0.536 | 0.544 | 0.553 | 0.561 | 0.568 | 0.573 | 0.577 | 0.581 | 0.586 | 0.59  | 0.593 | 0.598 | 0.602 | 0.607 | 0.612 | 0.618 | 0.626 | 0.635 | 0.644 | 0.652 | 0.661 | 0.669 |
| Bali                | 0.394 | 0.406 | 0.418 | 0.43  | 0.442 | 0.454 | 0.466 | 0.477 | 0.486 | 0.496 | 0.506 | 0.515 | 0.524 | 0.534 | 0.544 | 0.552 | 0.561 | 0.57  | 0.575 | 0.579 | 0.582 | 0.585 | 0.589 | 0.592 | 0.596 | 0.6   | 0.604 | 0.609 | 0.614 | 0.621 | 0.628 | 0.636 | 0.644 | 0.653 | 0.662 | 0.67  | 0.678 |
| Nusa Tenggara Barat | 0.285 | 0.297 | 0.307 | 0.318 | 0.328 | 0.338 | 0.346 | 0.354 | 0.361 | 0.367 | 0.374 | 0.383 | 0.392 | 0.403 | 0.413 | 0.424 | 0.434 | 0.444 | 0.452 | 0.458 | 0.466 | 0.475 | 0.483 | 0.49  | 0.498 | 0.505 | 0.511 | 0.518 | 0.524 | 0.532 | 0.539 | 0.547 | 0.554 | 0.562 | 0.569 | 0.577 | 0.584 |
| Nusa Tenggara Timur | 0.301 | 0.311 | 0.319 | 0.327 | 0.335 | 0.343 | 0.351 | 0.359 | 0.366 | 0.373 | 0.381 | 0.388 | 0.395 | 0.402 | 0.409 | 0.415 | 0.42  | 0.426 | 0.427 | 0.427 | 0.429 | 0.432 | 0.436 | 0.439 | 0.443 | 0.447 | 0.451 | 0.457 | 0.463 | 0.47  | 0.479 | 0.488 | 0.497 | 0.507 | 0.516 | 0.525 | 0.534 |
| Kalimantan Barat    | 0.319 | 0.33  | 0.341 | 0.353 | 0.365 | 0.377 | 0.388 | 0.398 | 0.408 | 0.419 | 0.429 | 0.439 | 0.45  | 0.461 | 0.472 | 0.483 | 0.494 | 0.505 | 0.517 | 0.525 | 0.535 | 0.543 | 0.553 | 0.558 | 0.564 | 0.57  | 0.577 | 0.584 | 0.591 | 0.598 | 0.606 | 0.614 | 0.622 | 0.63  | 0.638 | 0.646 | 0.654 |
| Kalimantan Tengah   | 0.41  | 0.42  | 0.429 | 0.439 | 0.449 | 0.459 | 0.469 | 0.479 | 0.488 | 0.497 | 0.506 | 0.515 | 0.523 | 0.534 | 0.545 | 0.554 | 0.564 | 0.573 | 0.579 | 0.583 | 0.585 | 0.586 | 0.587 | 0.588 | 0.59  | 0.591 | 0.594 | 0.598 | 0.603 | 0.61  | 0.617 | 0.625 | 0.633 | 0.642 | 0.65  | 0.659 | 0.667 |
| Kalimantan Selatan  | 0.399 | 0.41  | 0.421 | 0.432 | 0.442 | 0.453 | 0.463 | 0.472 | 0.48  | 0.487 | 0.494 | 0.502 | 0.51  | 0.519 | 0.527 | 0.534 | 0.542 | 0.549 | 0.554 | 0.558 | 0.561 | 0.564 | 0.567 | 0.57  | 0.574 | 0.577 | 0.58  | 0.584 | 0.589 | 0.594 | 0.601 | 0.609 | 0.617 | 0.625 | 0.633 | 0.642 | 0.649 |
| Kalimantan Timur    | 0.463 | 0.478 | 0.492 | 0.507 | 0.522 | 0.536 | 0.55  | 0.563 | 0.575 | 0.587 | 0.598 | 0.607 | 0.617 | 0.625 | 0.632 | 0.64  | 0.647 | 0.654 | 0.661 | 0.667 | 0.673 | 0.68  | 0.686 | 0.691 | 0.696 | 0.702 | 0.707 | 0.711 | 0.717 | 0.722 | 0.726 | 0.733 | 0.739 | 0.747 | 0.755 | 0.763 | 0.77  |
| Sulawesi Utara      | 0.44  | 0.45  | 0.46  | 0.469 | 0.478 | 0.487 | 0.495 | 0.503 | 0.51  | 0.517 | 0.524 | 0.532 | 0.539 | 0.548 | 0.556 | 0.564 | 0.573 | 0.581 | 0.588 | 0.591 | 0.593 | 0.595 | 0.596 | 0.597 | 0.599 | 0.601 | 0.603 | 0.607 | 0.612 | 0.619 | 0.626 | 0.634 | 0.642 | 0.651 | 0.659 | 0.668 | 0.675 |
| Sulawesi Tengah     | 0.363 | 0.373 | 0.383 | 0.392 | 0.402 | 0.411 | 0.42  | 0.429 | 0.437 | 0.444 | 0.452 | 0.46  | 0.468 | 0.476 | 0.485 | 0.493 | 0.502 | 0.509 | 0.516 | 0.523 | 0.527 | 0.533 | 0.538 | 0.542 | 0.547 | 0.551 | 0.555 | 0.559 | 0.565 | 0.572 | 0.579 | 0.588 | 0.597 | 0.606 | 0.616 | 0.625 | 0.633 |
| Sulawesi Selatan    | 0.354 | 0.366 | 0.377 | 0.388 | 0.399 | 0.409 | 0.42  | 0.429 | 0.438 | 0.447 | 0.456 | 0.465 | 0.474 | 0.482 | 0.489 | 0.496 | 0.504 | 0.51  | 0.516 | 0.52  | 0.525 | 0.53  | 0.535 | 0.54  | 0.546 | 0.55  | 0.554 | 0.56  | 0.566 | 0.574 | 0.583 | 0.593 | 0.603 | 0.613 | 0.623 | 0.632 | 0.64  |
| Sulawesi Tenggara   | 0.327 | 0.339 | 0.35  | 0.361 | 0.373 | 0.384 | 0.395 | 0.405 | 0.414 | 0.423 | 0.432 | 0.442 | 0.45  | 0.458 | 0.465 | 0.473 | 0.48  | 0.487 | 0.494 | 0.503 | 0.508 | 0.513 | 0.519 | 0.525 | 0.531 | 0.537 | 0.544 | 0.552 | 0.561 | 0.57  | 0.58  | 0.589 | 0.599 | 0.608 | 0.617 | 0.625 |       |
| Gorontalo           | 0.328 | 0.338 | 0.346 | 0.354 | 0.362 | 0.37  | 0.378 | 0.385 | 0.392 | 0.399 | 0.407 | 0.415 | 0.424 | 0.43  | 0.437 | 0.444 | 0.45  | 0.457 | 0.462 | 0.466 | 0.467 | 0.47  | 0.473 | 0.478 | 0.482 | 0.488 | 0.493 | 0.5   | 0.507 | 0.517 | 0.526 | 0.536 | 0.546 | 0.555 | 0.564 | 0.573 | 0.581 |
| Sulawesi Barat      | 0.318 | 0.329 | 0.338 | 0.348 | 0.358 | 0.368 | 0.378 | 0.387 | 0.396 | 0.405 | 0.414 | 0.422 | 0.43  | 0.436 | 0.442 | 0.447 | 0.453 | 0.458 | 0.462 | 0.466 | 0.469 | 0.473 | 0.477 | 0.481 | 0.485 | 0.489 | 0.493 | 0.498 | 0.507 | 0.516 | 0.525 | 0.536 | 0.547 | 0.558 | 0.568 | 0.579 | 0.587 |
| Maluku              | 0.446 | 0.453 | 0.46  | 0.468 | 0.476 | 0.483 | 0.491 | 0.499 | 0.506 | 0.512 | 0.519 | 0.526 | 0.533 | 0.539 | 0.545 | 0.551 | 0.557 | 0.562 | 0.566 | 0.567 | 0.569 | 0.573 | 0.578 | 0.584 | 0.589 | 0.594 | 0.599 | 0.604 | 0.609 | 0.614 | 0.62  | 0.625 | 0.631 | 0.636 | 0.641 | 0.646 | 0.651 |
| Maluku Utara        | 0.364 | 0.374 | 0.383 | 0.393 | 0.404 | 0.414 | 0.423 | 0.432 | 0.441 | 0.449 | 0.458 | 0.467 | 0.476 | 0.483 | 0.491 | 0.498 | 0.506 | 0.514 | 0.518 | 0.523 | 0.524 | 0.524 | 0.523 | 0.521 | 0.518 | 0.515 | 0.511 | 0.508 | 0.507 | 0.51  | 0.515 | 0.522 | 0.531 | 0.541 | 0.552 | 0.562 | 0.571 |
| Papua Barat         | 0.413 | 0.425 | 0.436 | 0.448 | 0.461 | 0.472 | 0.484 | 0.495 | 0.505 | 0.515 | 0.525 | 0.534 | 0.543 | 0.55  | 0.558 | 0.565 | 0.572 | 0.578 | 0.582 | 0.585 | 0.587 | 0.589 | 0.59  | 0.592 | 0.594 | 0.596 | 0.598 | 0.601 | 0.607 | 0.615 | 0.626 | 0.643 | 0.657 | 0.671 | 0.683 | 0.695 | 0.706 |
| Papua               | 0.442 | 0.45  | 0.457 | 0.465 | 0.474 | 0.481 | 0.488 | 0.494 | 0.5   | 0.505 | 0.51  | 0.516 | 0.522 | 0.529 | 0.534 | 0.54  | 0.546 | 0.552 | 0.558 |       |       |       |       |       |       |       |       |       |       |       |       |       |       |       |       |       |       |

Appendix Table 11: Socio-Demographic Index values for all estimated GBD 2016 locations, 1980–2016

| Location                 | 1980  | 1981  | 1982  | 1983  | 1984  | 1985  | 1986  | 1987  | 1988  | 1989  | 1990  | 1991  | 1992  | 1993  | 1994  | 1995  | 1996  | 1997  | 1998  | 1999  | 2000  | 2001  | 2002  | 2003  | 2004  | 2005  | 2006  | 2007  | 2008  | 2009  | 2010  | 2011  | 2012  | 2013  | 2014  | 2015  | 2016  |       |
|--------------------------|-------|-------|-------|-------|-------|-------|-------|-------|-------|-------|-------|-------|-------|-------|-------|-------|-------|-------|-------|-------|-------|-------|-------|-------|-------|-------|-------|-------|-------|-------|-------|-------|-------|-------|-------|-------|-------|-------|
| Albania                  | 0.54  | 0.545 | 0.55  | 0.555 | 0.56  | 0.564 | 0.569 | 0.573 | 0.577 | 0.581 | 0.584 | 0.585 | 0.584 | 0.585 | 0.588 | 0.593 | 0.601 | 0.607 | 0.614 | 0.623 | 0.633 | 0.642 | 0.651 | 0.659 | 0.667 | 0.674 | 0.68  | 0.686 | 0.692 | 0.697 | 0.702 | 0.706 | 0.711 | 0.714 | 0.718 | 0.721 | 0.725 |       |
| Bosnia and Herzegovina   | 0.502 | 0.508 | 0.514 | 0.518 | 0.522 | 0.527 | 0.532 | 0.535 | 0.539 | 0.542 | 0.542 | 0.542 | 0.543 | 0.546 | 0.552 | 0.573 | 0.597 | 0.619 | 0.635 | 0.648 | 0.658 | 0.667 | 0.675 | 0.682 | 0.688 | 0.694 | 0.699 | 0.705 | 0.71  | 0.714 | 0.717 | 0.721 | 0.724 | 0.727 | 0.73  | 0.733 |       |       |
| Bulgaria                 | 0.705 | 0.71  | 0.715 | 0.72  | 0.724 | 0.728 | 0.733 | 0.738 | 0.744 | 0.752 | 0.76  | 0.767 | 0.771 | 0.771 | 0.771 | 0.777 | 0.783 | 0.786 | 0.789 | 0.793 | 0.797 | 0.801 | 0.806 | 0.811 | 0.815 | 0.819 | 0.824 | 0.828 | 0.833 | 0.836 | 0.838 | 0.841 | 0.843 | 0.845 | 0.846 | 0.848 | 0.85  |       |
| Croatia                  | 0.746 | 0.751 | 0.755 | 0.759 | 0.763 | 0.767 | 0.772 | 0.775 | 0.779 | 0.782 | 0.786 | 0.789 | 0.788 | 0.785 | 0.782 | 0.779 | 0.779 | 0.785 | 0.79  | 0.793 | 0.797 | 0.801 | 0.806 | 0.811 | 0.815 | 0.819 | 0.824 | 0.828 | 0.833 | 0.836 | 0.838 | 0.841 | 0.843 | 0.845 | 0.846 | 0.848 | 0.85  |       |
| Czech Republic           | 0.786 | 0.79  | 0.793 | 0.796 | 0.798 | 0.8   | 0.803 | 0.805 | 0.807 | 0.81  | 0.812 | 0.816 | 0.82  | 0.826 | 0.829 | 0.83  | 0.832 | 0.834 | 0.835 | 0.837 | 0.839 | 0.842 | 0.844 | 0.847 | 0.85  | 0.853 | 0.856 | 0.86  | 0.863 | 0.866 | 0.869 | 0.871 | 0.873 | 0.875 | 0.875 | 0.878 | 0.881 |       |
| Hungary                  | 0.711 | 0.719 | 0.727 | 0.732 | 0.733 | 0.735 | 0.739 | 0.744 | 0.748 | 0.751 | 0.753 | 0.756 | 0.761 | 0.766 | 0.77  | 0.777 | 0.78  | 0.783 | 0.786 | 0.79  | 0.794 | 0.798 | 0.803 | 0.807 | 0.812 | 0.816 | 0.821 | 0.825 | 0.828 | 0.831 | 0.834 | 0.836 | 0.838 | 0.841 | 0.843 | 0.844 | 0.846 | 0.849 |
| Macedonia                | 0.664 | 0.669 | 0.673 | 0.677 | 0.681 | 0.686 | 0.69  | 0.695 | 0.7   | 0.702 | 0.7   | 0.699 | 0.701 | 0.701 | 0.701 | 0.703 | 0.708 | 0.712 | 0.716 | 0.718 | 0.723 | 0.73  | 0.737 | 0.742 | 0.745 | 0.749 | 0.753 | 0.757 | 0.762 | 0.765 | 0.77  | 0.775 | 0.779 | 0.782 | 0.786 | 0.789 | 0.793 |       |
| Montenegro               | 0.725 | 0.728 | 0.732 | 0.734 | 0.737 | 0.739 | 0.742 | 0.744 | 0.746 | 0.748 | 0.75  | 0.751 | 0.75  | 0.747 | 0.743 | 0.74  | 0.74  | 0.741 | 0.743 | 0.745 | 0.748 | 0.753 | 0.759 | 0.764 | 0.769 | 0.773 | 0.777 | 0.781 | 0.786 | 0.79  | 0.795 | 0.8   | 0.803 | 0.806 | 0.809 | 0.812 | 0.815 |       |
| Poland                   | 0.702 | 0.702 | 0.699 | 0.699 | 0.703 | 0.708 | 0.714 | 0.719 | 0.724 | 0.73  | 0.735 | 0.739 | 0.745 | 0.751 | 0.759 | 0.767 | 0.773 | 0.778 | 0.783 | 0.789 | 0.795 | 0.8   | 0.805 | 0.81  | 0.815 | 0.82  | 0.824 | 0.83  | 0.835 | 0.84  | 0.845 | 0.85  | 0.855 | 0.86  | 0.864 | 0.868 | 0.872 |       |
| Romania                  | 0.661 | 0.672 | 0.684 | 0.688 | 0.687 | 0.688 | 0.689 | 0.695 | 0.703 | 0.715 | 0.731 | 0.738 | 0.738 | 0.739 | 0.74  | 0.742 | 0.744 | 0.747 | 0.749 | 0.751 | 0.755 | 0.759 | 0.764 | 0.769 | 0.774 | 0.78  | 0.786 | 0.794 | 0.802 | 0.808 | 0.813 | 0.818 | 0.822 | 0.827 | 0.83  | 0.833 | 0.838 |       |
| Serbia                   | 0.678 | 0.68  | 0.682 | 0.683 | 0.684 | 0.686 | 0.689 | 0.691 | 0.694 | 0.697 | 0.7   | 0.703 | 0.704 | 0.701 | 0.699 | 0.697 | 0.698 | 0.702 | 0.707 | 0.709 | 0.712 | 0.714 | 0.717 | 0.722 | 0.728 | 0.733 | 0.737 | 0.742 | 0.747 | 0.752 | 0.755 | 0.759 | 0.761 | 0.764 | 0.767 | 0.769 | 0.771 |       |
| Slovakia                 | 0.749 | 0.753 | 0.756 | 0.759 | 0.762 | 0.766 | 0.77  | 0.774 | 0.778 | 0.781 | 0.785 | 0.788 | 0.792 | 0.797 | 0.805 | 0.81  | 0.812 | 0.814 | 0.817 | 0.82  | 0.822 | 0.825 | 0.828 | 0.831 | 0.835 | 0.839 | 0.843 | 0.848 | 0.854 | 0.858 | 0.86  | 0.863 | 0.866 | 0.868 | 0.871 | 0.874 | 0.877 | 0.88  |
| Slovenia                 | 0.766 | 0.774 | 0.782 | 0.789 | 0.793 | 0.797 | 0.801 | 0.803 | 0.808 | 0.813 | 0.813 | 0.813 | 0.812 | 0.812 | 0.813 | 0.815 | 0.817 | 0.82  | 0.823 | 0.827 | 0.831 | 0.835 | 0.839 | 0.843 | 0.847 | 0.851 | 0.856 | 0.86  | 0.863 | 0.865 | 0.867 | 0.869 | 0.871 | 0.873 | 0.874 | 0.877 | 0.881 |       |
| Eastern Europe           | 0.737 | 0.738 | 0.738 | 0.739 | 0.742 | 0.743 | 0.744 | 0.747 | 0.753 | 0.76  | 0.767 | 0.775 | 0.782 | 0.782 | 0.78  | 0.777 | 0.774 | 0.771 | 0.768 | 0.766 | 0.766 | 0.768 | 0.77  | 0.774 | 0.78  | 0.786 | 0.792 | 0.8   | 0.806 | 0.81  | 0.813 | 0.817 | 0.819 | 0.821 | 0.823 | 0.826 | 0.829 |       |
| Belarus                  | 0.703 | 0.706 | 0.708 | 0.711 | 0.713 | 0.716 | 0.719 | 0.723 | 0.727 | 0.733 | 0.738 | 0.743 | 0.748 | 0.751 | 0.752 | 0.748 | 0.744 | 0.742 | 0.741 | 0.74  | 0.741 | 0.744 | 0.747 | 0.752 | 0.758 | 0.765 | 0.772 | 0.78  | 0.788 | 0.795 | 0.8   | 0.805 | 0.81  | 0.814 | 0.818 | 0.822 | 0.826 |       |
| Estonia                  | 0.775 | 0.776 | 0.776 | 0.776 | 0.779 | 0.78  | 0.779 | 0.778 | 0.781 | 0.788 | 0.799 | 0.807 | 0.813 | 0.814 | 0.813 | 0.812 | 0.812 | 0.813 | 0.816 | 0.818 | 0.822 | 0.832 | 0.837 | 0.843 | 0.847 | 0.851 | 0.854 | 0.859 | 0.861 | 0.866 | 0.872 | 0.877 | 0.88  | 0.883 | 0.885 | 0.887 |       |       |
| Latvia                   | 0.759 | 0.759 | 0.758 | 0.758 | 0.759 | 0.76  | 0.762 | 0.765 | 0.77  | 0.776 | 0.783 | 0.789 | 0.793 | 0.794 | 0.79  | 0.786 | 0.783 | 0.781 | 0.781 | 0.783 | 0.785 | 0.79  | 0.795 | 0.801 | 0.808 | 0.815 | 0.822 | 0.831 | 0.837 | 0.841 | 0.843 | 0.847 | 0.85  | 0.851 | 0.851 | 0.851 | 0.851 | 0.853 |
| Lithuania                | 0.768 | 0.771 | 0.772 | 0.772 | 0.774 | 0.776 | 0.777 | 0.781 | 0.787 | 0.79  | 0.792 | 0.795 | 0.8   | 0.805 | 0.805 | 0.804 | 0.801 | 0.801 | 0.801 | 0.803 | 0.805 | 0.809 | 0.814 | 0.819 | 0.825 | 0.832 | 0.838 | 0.845 | 0.851 | 0.853 | 0.856 | 0.858 | 0.862 | 0.865 | 0.869 | 0.872 | 0.876 |       |
| Moldova                  | 0.614 | 0.617 | 0.619 | 0.621 | 0.623 | 0.625 | 0.628 | 0.632 | 0.636 | 0.641 | 0.647 | 0.651 | 0.652 | 0.654 | 0.652 | 0.647 | 0.643 | 0.637 | 0.631 | 0.626 | 0.624 | 0.623 | 0.626 | 0.629 | 0.634 | 0.64  | 0.646 | 0.653 | 0.66  | 0.665 | 0.67  | 0.678 | 0.683 | 0.689 | 0.695 | 0.699 | 0.703 |       |
| Russia                   | 0.745 | 0.746 | 0.745 | 0.745 | 0.749 | 0.749 | 0.748 | 0.751 | 0.758 | 0.766 | 0.774 | 0.782 | 0.788 | 0.787 | 0.786 | 0.784 | 0.781 | 0.778 | 0.775 | 0.774 | 0.774 | 0.775 | 0.778 | 0.782 | 0.787 | 0.793 | 0.799 | 0.806 | 0.811 | 0.814 | 0.818 | 0.821 | 0.823 | 0.824 | 0.826 | 0.829 | 0.832 |       |
| Ukraine                  | 0.712 | 0.715 | 0.717 | 0.719 | 0.721 | 0.724 | 0.727 | 0.731 | 0.737 | 0.742 | 0.748 | 0.753 | 0.757 | 0.76  | 0.758 | 0.753 | 0.748 | 0.742 | 0.737 | 0.732 | 0.729 | 0.728 | 0.729 | 0.733 | 0.74  | 0.747 | 0.755 | 0.763 | 0.77  | 0.774 | 0.778 | 0.782 | 0.785 | 0.789 | 0.791 | 0.792 | 0.793 |       |
| High-income              | 0.773 | 0.778 | 0.782 | 0.787 | 0.791 | 0.795 | 0.799 | 0.803 | 0.806 | 0.809 | 0.813 | 0.817 | 0.822 | 0.826 | 0.83  | 0.837 | 0.84  | 0.843 | 0.845 | 0.848 | 0.854 | 0.856 | 0.859 | 0.86  | 0.861 | 0.863 | 0.866 | 0.868 | 0.871 | 0.873 | 0.875 | 0.877 | 0.879 | 0.881 | 0.882 |       |       |       |
| High-income Asia Pacific | 0.745 | 0.75  | 0.756 | 0.763 | 0.769 | 0.775 | 0.781 | 0.787 | 0.793 | 0.799 | 0.805 | 0.809 | 0.816 | 0.821 | 0.826 | 0.831 | 0.835 | 0.839 | 0.841 | 0.844 | 0.847 | 0.849 | 0.851 | 0.854 | 0.856 | 0.859 | 0.861 | 0.864 | 0.867 | 0.868 | 0.871 | 0.873 | 0.875 | 0.877 | 0.879 | 0.882 | 0.884 |       |
| Brunei                   | 0.674 | 0.681 | 0.687 | 0.694 | 0.7   | 0.706 | 0.713 | 0.721 | 0.729 | 0.737 | 0.744 | 0.751 | 0.756 | 0.761 | 0.766 | 0.772 | 0.777 | 0.783 | 0.789 | 0.796 | 0.803 | 0.809 | 0.815 | 0.821 | 0.827 | 0.833 | 0.839 | 0.844 | 0.849 | 0.853 | 0.856 | 0.858 | 0.861 | 0.863 | 0.866 | 0.869 | 0.871 |       |
| Japan                    | 0.776 | 0.779 | 0.781 | 0.784 | 0.788 | 0.793 | 0.798 | 0.803 | 0.81  | 0.817 | 0.822 | 0.828 | 0.833 | 0.837 | 0.84  | 0.844 | 0.847 | 0.85  | 0.852 | 0.854 | 0.856 | 0.858 | 0.859 | 0.861 | 0.863 | 0.865 | 0.867 | 0.869 | 0.871 | 0.872 | 0.873 | 0.875 | 0.877 | 0.878 | 0.88  | 0.882 | 0.884 |       |
| South Korea              | 0.618 | 0.631 | 0.649 | 0.669 | 0.684 | 0.693 | 0.704 | 0.714 | 0.723 | 0.732 | 0.738 | 0.744 | 0.753 | 0.764 | 0.772 | 0.781 | 0.791 | 0.8   | 0.805 | 0.81  | 0.816 | 0.821 | 0.826 | 0.831 | 0.835 | 0.84  | 0.845 | 0.849 | 0.853 | 0.857 | 0.861 | 0.864 | 0.868 | 0.871 | 0.874 | 0.878 | 0.881 |       |
| Singapore                | 0.678 | 0.686 | 0.695 | 0.704 | 0.711 | 0.717 | 0.718 | 0.711 | 0.719 | 0.734 | 0.741 | 0.748 | 0.754 | 0.76  | 0.768 | 0.776 | 0.784 | 0.795 | 0.802 | 0.805 | 0.812 | 0.818 | 0.823 | 0.828 | 0.834 | 0.84  | 0.846 | 0.852 | 0.858 | 0.863 | 0.867 | 0.869 | 0.873 | 0.876 | 0.879 | 0.883 | 0.886 |       |
| Hokkaidō                 | 0.771 | 0.775 | 0.778 | 0.78  | 0.784 | 0.79  | 0.794 | 0.799 | 0.804 | 0.809 | 0.813 | 0.818 | 0.822 | 0.826 | 0.83  | 0.833 | 0.836 | 0.839 | 0.841 | 0.843 | 0.845 | 0.847 | 0.848 | 0.85  | 0.852 | 0.853 | 0.855 | 0.857 | 0.859 | 0.86  | 0.861 | 0.862 | 0.864 | 0.866 | 0.867 | 0.869 | 0.87  |       |
| Aomori                   | 0.76  | 0.764 | 0.766 | 0.769 | 0.773 | 0.778 | 0.784 | 0.789 | 0.795 | 0.801 | 0.805 | 0.81  | 0.814 | 0.818 | 0.822 | 0.827 | 0.831 | 0.835 | 0.841 | 0.844 | 0.848 | 0.85  | 0.852 | 0.854 | 0.855 | 0.856 | 0.858 | 0.86  | 0.861 | 0.862 | 0.863 | 0.865 | 0.866 | 0.868 | 0.869 | 0.871 | 0.873 |       |
| Iwate                    | 0.752 | 0.756 | 0.758 | 0.761 | 0.766 | 0.771 | 0.776 | 0.78  | 0.786 | 0.792 | 0.797 | 0.802 | 0.807 | 0.811 | 0.816 | 0.821 | 0.826 | 0.83  | 0.833 | 0.835 | 0.838 | 0.84  | 0.842 | 0.844 | 0.846 | 0.848 | 0.849 | 0.851 | 0.853 | 0.854 | 0.856 | 0.857 | 0.859 | 0.86  | 0.862 | 0.864 | 0.865 |       |
| Miyagi                   | 0.763 | 0.767 | 0.77  | 0.773 | 0.778 | 0.783 | 0.789 | 0.794 | 0.8   | 0.807 | 0.813 | 0.818 | 0.824 | 0.828 | 0.832 | 0.836 | 0.839 | 0.842 | 0.844 | 0.846 | 0.848 | 0.85  | 0.851 | 0.853 | 0.855 | 0.857 | 0.859 | 0.861 | 0.862 | 0.863 | 0.865 | 0.866 | 0.868 | 0.869 | 0.871 | 0.873 | 0.874 |       |
| Akita                    | 0.759 | 0.763 | 0.766 | 0.769 | 0.773 | 0.778 | 0.782 | 0.787 | 0.792 | 0.798 | 0.802 | 0.806 | 0.811 | 0.815 | 0.819 | 0.823 | 0.828 | 0.832 | 0.834 |       |       |       |       |       |       |       |       |       |       |       |       |       |       |       |       |       |       |       |

Appendix Table 11: Socio-Demographic Index values for all estimated GBD 2016 locations, 1980–2016

| Location       | 1980  | 1981  | 1982  | 1983  | 1984  | 1985  | 1986  | 1987  | 1988  | 1989  | 1990  | 1991  | 1992  | 1993  | 1994  | 1995  | 1996  | 1997  | 1998  | 1999  | 2000  | 2001  | 2002  | 2003  | 2004  | 2005  | 2006  | 2007  | 2008  | 2009  | 2010  | 2011  | 2012  | 2013  | 2014  | 2015  | 2016  |       |
|----------------|-------|-------|-------|-------|-------|-------|-------|-------|-------|-------|-------|-------|-------|-------|-------|-------|-------|-------|-------|-------|-------|-------|-------|-------|-------|-------|-------|-------|-------|-------|-------|-------|-------|-------|-------|-------|-------|-------|
| Tottori        | 0.747 | 0.751 | 0.753 | 0.755 | 0.759 | 0.764 | 0.769 | 0.774 | 0.778 | 0.786 | 0.791 | 0.797 | 0.803 | 0.807 | 0.812 | 0.817 | 0.822 | 0.826 | 0.83  | 0.832 | 0.835 | 0.837 | 0.84  | 0.843 | 0.845 | 0.847 | 0.849 | 0.851 | 0.853 | 0.854 | 0.856 | 0.857 | 0.858 | 0.859 | 0.861 | 0.864 | 0.866 |       |
| Shimane        | 0.744 | 0.748 | 0.75  | 0.752 | 0.756 | 0.761 | 0.766 | 0.771 | 0.777 | 0.783 | 0.788 | 0.794 | 0.799 | 0.803 | 0.808 | 0.813 | 0.818 | 0.823 | 0.827 | 0.83  | 0.833 | 0.836 | 0.839 | 0.842 | 0.845 | 0.847 | 0.849 | 0.85  | 0.852 | 0.853 | 0.854 | 0.856 | 0.857 | 0.858 | 0.859 | 0.861 | 0.864 | 0.866 |
| Okayama        | 0.762 | 0.765 | 0.767 | 0.769 | 0.773 | 0.779 | 0.784 | 0.79  | 0.797 | 0.804 | 0.809 | 0.815 | 0.821 | 0.825 | 0.83  | 0.835 | 0.839 | 0.843 | 0.845 | 0.847 | 0.849 | 0.851 | 0.853 | 0.855 | 0.857 | 0.859 | 0.861 | 0.863 | 0.865 | 0.866 | 0.867 | 0.869 | 0.871 | 0.872 | 0.874 | 0.876 | 0.878 |       |
| Hiroshima      | 0.77  | 0.773 | 0.775 | 0.777 | 0.781 | 0.787 | 0.792 | 0.797 | 0.804 | 0.811 | 0.816 | 0.822 | 0.828 | 0.833 | 0.837 | 0.842 | 0.845 | 0.848 | 0.85  | 0.852 | 0.854 | 0.856 | 0.857 | 0.859 | 0.861 | 0.863 | 0.865 | 0.867 | 0.869 | 0.869 | 0.87  | 0.871 | 0.872 | 0.874 | 0.877 | 0.881 |       |       |
| Yamaguchi      | 0.767 | 0.771 | 0.773 | 0.775 | 0.779 | 0.784 | 0.789 | 0.795 | 0.801 | 0.808 | 0.813 | 0.818 | 0.824 | 0.828 | 0.832 | 0.837 | 0.84  | 0.843 | 0.846 | 0.848 | 0.85  | 0.851 | 0.853 | 0.855 | 0.857 | 0.859 | 0.861 | 0.863 | 0.865 | 0.866 | 0.867 | 0.868 | 0.868 | 0.87  | 0.872 | 0.874 | 0.875 | 0.878 |
| Tokushima      | 0.762 | 0.765 | 0.768 | 0.77  | 0.774 | 0.78  | 0.785 | 0.79  | 0.796 | 0.803 | 0.808 | 0.814 | 0.82  | 0.824 | 0.828 | 0.832 | 0.835 | 0.838 | 0.841 | 0.843 | 0.845 | 0.847 | 0.849 | 0.85  | 0.852 | 0.854 | 0.856 | 0.858 | 0.86  | 0.861 | 0.862 | 0.864 | 0.866 | 0.867 | 0.869 | 0.871 | 0.873 |       |
| Kagawa         | 0.764 | 0.768 | 0.77  | 0.772 | 0.776 | 0.781 | 0.786 | 0.791 | 0.798 | 0.805 | 0.811 | 0.817 | 0.822 | 0.827 | 0.831 | 0.835 | 0.839 | 0.842 | 0.844 | 0.846 | 0.848 | 0.85  | 0.852 | 0.854 | 0.855 | 0.857 | 0.859 | 0.861 | 0.863 | 0.864 | 0.865 | 0.866 | 0.867 | 0.869 | 0.872 | 0.875 |       |       |
| Ehime          | 0.757 | 0.761 | 0.764 | 0.767 | 0.771 | 0.776 | 0.781 | 0.786 | 0.792 | 0.799 | 0.804 | 0.809 | 0.815 | 0.819 | 0.823 | 0.828 | 0.832 | 0.835 | 0.837 | 0.839 | 0.841 | 0.843 | 0.845 | 0.847 | 0.849 | 0.851 | 0.852 | 0.855 | 0.856 | 0.857 | 0.859 | 0.861 | 0.862 | 0.864 | 0.866 | 0.867 | 0.869 |       |
| Kōchi          | 0.746 | 0.749 | 0.751 | 0.753 | 0.757 | 0.763 | 0.768 | 0.774 | 0.78  | 0.787 | 0.792 | 0.796 | 0.801 | 0.805 | 0.81  | 0.815 | 0.819 | 0.823 | 0.825 | 0.827 | 0.829 | 0.831 | 0.833 | 0.835 | 0.837 | 0.839 | 0.84  | 0.843 | 0.844 | 0.845 | 0.847 | 0.848 | 0.85  | 0.852 | 0.853 | 0.855 | 0.857 |       |
| Fukuoka        | 0.769 | 0.773 | 0.775 | 0.777 | 0.782 | 0.787 | 0.792 | 0.798 | 0.804 | 0.811 | 0.816 | 0.822 | 0.826 | 0.83  | 0.834 | 0.837 | 0.841 | 0.844 | 0.846 | 0.848 | 0.85  | 0.852 | 0.853 | 0.855 | 0.857 | 0.859 | 0.861 | 0.863 | 0.865 | 0.866 | 0.867 | 0.869 | 0.87  | 0.872 | 0.874 | 0.876 | 0.877 |       |
| Saga           | 0.751 | 0.755 | 0.757 | 0.76  | 0.764 | 0.769 | 0.775 | 0.78  | 0.786 | 0.793 | 0.798 | 0.803 | 0.808 | 0.812 | 0.816 | 0.821 | 0.825 | 0.828 | 0.831 | 0.834 | 0.836 | 0.839 | 0.843 | 0.846 | 0.849 | 0.85  | 0.852 | 0.853 | 0.854 | 0.855 | 0.856 | 0.857 | 0.859 | 0.861 | 0.863 | 0.866 | 0.869 |       |
| Nagasaki       | 0.749 | 0.753 | 0.755 | 0.757 | 0.761 | 0.767 | 0.772 | 0.777 | 0.783 | 0.79  | 0.794 | 0.799 | 0.804 | 0.808 | 0.813 | 0.818 | 0.822 | 0.826 | 0.829 | 0.832 | 0.834 | 0.837 | 0.839 | 0.841 | 0.843 | 0.845 | 0.847 | 0.848 | 0.849 | 0.849 | 0.85  | 0.851 | 0.852 | 0.854 | 0.857 | 0.859 |       |       |
| Kumamoto       | 0.75  | 0.754 | 0.757 | 0.759 | 0.763 | 0.768 | 0.773 | 0.778 | 0.784 | 0.791 | 0.796 | 0.801 | 0.806 | 0.81  | 0.814 | 0.819 | 0.823 | 0.827 | 0.83  | 0.832 | 0.835 | 0.837 | 0.839 | 0.841 | 0.843 | 0.845 | 0.846 | 0.846 | 0.847 | 0.848 | 0.849 | 0.85  | 0.851 | 0.852 | 0.854 | 0.857 | 0.86  |       |
| Ōita           | 0.761 | 0.765 | 0.768 | 0.771 | 0.775 | 0.78  | 0.785 | 0.789 | 0.795 | 0.802 | 0.807 | 0.812 | 0.817 | 0.821 | 0.825 | 0.83  | 0.834 | 0.838 | 0.841 | 0.843 | 0.845 | 0.847 | 0.849 | 0.85  | 0.852 | 0.854 | 0.856 | 0.858 | 0.86  | 0.861 | 0.862 | 0.863 | 0.865 | 0.867 | 0.87  | 0.872 |       |       |
| Miyazaki       | 0.749 | 0.752 | 0.755 | 0.757 | 0.762 | 0.767 | 0.773 | 0.778 | 0.784 | 0.79  | 0.795 | 0.799 | 0.804 | 0.808 | 0.812 | 0.816 | 0.821 | 0.825 | 0.828 | 0.831 | 0.833 | 0.836 | 0.839 | 0.841 | 0.844 | 0.845 | 0.845 | 0.846 | 0.847 | 0.847 | 0.848 | 0.849 | 0.85  | 0.853 | 0.855 | 0.858 |       |       |
| Kagoshima      | 0.744 | 0.748 | 0.751 | 0.754 | 0.759 | 0.765 | 0.77  | 0.775 | 0.782 | 0.788 | 0.793 | 0.799 | 0.804 | 0.808 | 0.813 | 0.818 | 0.822 | 0.826 | 0.828 | 0.83  | 0.832 | 0.834 | 0.837 | 0.84  | 0.842 | 0.844 | 0.846 | 0.846 | 0.847 | 0.848 | 0.849 | 0.85  | 0.851 | 0.852 | 0.853 | 0.855 | 0.858 |       |
| Okinawa        | 0.73  | 0.734 | 0.736 | 0.738 | 0.743 | 0.75  | 0.756 | 0.762 | 0.769 | 0.777 | 0.782 | 0.787 | 0.793 | 0.797 | 0.802 | 0.808 | 0.812 | 0.816 | 0.819 | 0.821 | 0.823 | 0.825 | 0.828 | 0.832 | 0.835 | 0.836 | 0.836 | 0.837 | 0.837 | 0.837 | 0.838 | 0.838 | 0.84  | 0.842 | 0.845 | 0.848 |       |       |
| Australasia    | 0.787 | 0.79  | 0.793 | 0.796 | 0.799 | 0.802 | 0.805 | 0.808 | 0.811 | 0.813 | 0.815 | 0.818 | 0.821 | 0.824 | 0.828 | 0.832 | 0.836 | 0.839 | 0.843 | 0.846 | 0.849 | 0.853 | 0.856 | 0.858 | 0.86  | 0.862 | 0.861 | 0.861 | 0.864 | 0.867 | 0.87  | 0.872 | 0.875 | 0.88  | 0.884 | 0.887 |       |       |
| Australia      | 0.787 | 0.789 | 0.792 | 0.796 | 0.799 | 0.802 | 0.806 | 0.81  | 0.813 | 0.815 | 0.818 | 0.82  | 0.823 | 0.826 | 0.83  | 0.834 | 0.838 | 0.842 | 0.845 | 0.849 | 0.853 | 0.856 | 0.858 | 0.862 | 0.865 | 0.865 | 0.865 | 0.865 | 0.865 | 0.865 | 0.865 | 0.865 | 0.865 | 0.865 | 0.865 | 0.865 | 0.865 |       |
| New Zealand    | 0.786 | 0.79  | 0.794 | 0.797 | 0.799 | 0.8   | 0.8   | 0.8   | 0.8   | 0.8   | 0.803 | 0.807 | 0.81  | 0.813 | 0.816 | 0.819 | 0.822 | 0.826 | 0.828 | 0.828 | 0.831 | 0.836 | 0.839 | 0.84  | 0.841 | 0.843 | 0.84  | 0.838 | 0.841 | 0.844 | 0.847 | 0.851 | 0.856 | 0.86  | 0.863 | 0.865 | 0.867 |       |
| Western Europe | 0.754 | 0.759 | 0.765 | 0.771 | 0.775 | 0.779 | 0.784 | 0.788 | 0.792 | 0.797 | 0.801 | 0.807 | 0.812 | 0.817 | 0.821 | 0.825 | 0.828 | 0.832 | 0.835 | 0.838 | 0.842 | 0.845 | 0.848 | 0.85  | 0.852 | 0.854 | 0.856 | 0.858 | 0.859 | 0.861 | 0.864 | 0.866 | 0.869 | 0.871 | 0.873 | 0.874 | 0.876 |       |
| Andorra        | 0.845 | 0.848 | 0.85  | 0.852 | 0.855 | 0.857 | 0.859 | 0.862 | 0.864 | 0.866 | 0.868 | 0.87  | 0.872 | 0.873 | 0.875 | 0.876 | 0.878 | 0.881 | 0.884 | 0.887 | 0.889 | 0.891 | 0.892 | 0.894 | 0.896 | 0.897 | 0.899 | 0.901 | 0.902 | 0.904 | 0.906 | 0.907 | 0.909 | 0.91  | 0.912 | 0.913 | 0.915 |       |
| Austria        | 0.801 | 0.803 | 0.807 | 0.812 | 0.816 | 0.818 | 0.82  | 0.822 | 0.824 | 0.827 | 0.83  | 0.832 | 0.836 | 0.838 | 0.841 | 0.844 | 0.846 | 0.849 | 0.851 | 0.854 | 0.857 | 0.86  | 0.862 | 0.864 | 0.867 | 0.869 | 0.871 | 0.874 | 0.876 | 0.878 | 0.88  | 0.882 | 0.885 | 0.887 | 0.889 | 0.89  | 0.892 |       |
| Belgium        | 0.813 | 0.818 | 0.823 | 0.827 | 0.831 | 0.833 | 0.835 | 0.837 | 0.84  | 0.841 | 0.843 | 0.846 | 0.85  | 0.855 | 0.859 | 0.861 | 0.862 | 0.865 | 0.867 | 0.869 | 0.871 | 0.874 | 0.877 | 0.877 | 0.878 | 0.879 | 0.88  | 0.882 | 0.883 | 0.886 | 0.89  | 0.893 | 0.896 | 0.897 | 0.898 | 0.899 |       |       |
| Cyprus         | 0.692 | 0.696 | 0.699 | 0.704 | 0.712 | 0.72  | 0.726 | 0.73  | 0.734 | 0.739 | 0.745 | 0.748 | 0.754 | 0.765 | 0.774 | 0.783 | 0.79  | 0.798 | 0.806 | 0.812 | 0.819 | 0.826 | 0.831 | 0.835 | 0.839 | 0.843 | 0.847 | 0.852 | 0.856 | 0.86  | 0.863 | 0.866 | 0.869 | 0.87  | 0.871 | 0.872 |       |       |
| Denmark        | 0.866 | 0.867 | 0.869 | 0.871 | 0.873 | 0.876 | 0.879 | 0.88  | 0.88  | 0.88  | 0.88  | 0.88  | 0.88  | 0.881 | 0.882 | 0.885 | 0.889 | 0.893 | 0.895 | 0.897 | 0.9   | 0.903 | 0.906 | 0.906 | 0.906 | 0.907 | 0.908 | 0.909 | 0.911 | 0.914 | 0.919 | 0.922 | 0.925 | 0.925 | 0.925 | 0.925 |       |       |
| Finland        | 0.815 | 0.816 | 0.818 | 0.821 | 0.826 | 0.832 | 0.836 | 0.837 | 0.838 | 0.84  | 0.841 | 0.841 | 0.842 | 0.843 | 0.845 | 0.849 | 0.852 | 0.856 | 0.86  | 0.863 | 0.867 | 0.871 | 0.874 | 0.876 | 0.878 | 0.88  | 0.883 | 0.886 | 0.888 | 0.89  | 0.892 | 0.896 | 0.9   | 0.904 | 0.906 | 0.907 |       |       |
| France         | 0.743 | 0.749 | 0.758 | 0.765 | 0.769 | 0.773 | 0.777 | 0.783 | 0.788 | 0.793 | 0.799 | 0.805 | 0.812 | 0.817 | 0.821 | 0.823 | 0.826 | 0.829 | 0.832 | 0.833 | 0.836 | 0.84  | 0.843 | 0.846 | 0.848 | 0.849 | 0.85  | 0.853 | 0.855 | 0.856 | 0.858 | 0.861 | 0.863 | 0.865 | 0.867 | 0.868 | 0.869 |       |
| Germany        | 0.801 | 0.804 | 0.807 | 0.809 | 0.812 | 0.814 | 0.817 | 0.82  | 0.822 | 0.826 | 0.829 | 0.832 | 0.835 | 0.838 | 0.841 | 0.843 | 0.845 | 0.847 | 0.85  | 0.852 | 0.854 | 0.857 | 0.86  | 0.862 | 0.864 | 0.866 | 0.869 | 0.871 | 0.873 | 0.875 | 0.877 | 0.88  | 0.882 | 0.884 | 0.886 | 0.889 |       |       |
| Greece         | 0.699 | 0.708 | 0.714 | 0.722 | 0.731 | 0.739 | 0.745 | 0.751 | 0.756 | 0.761 | 0.765 | 0.77  | 0.775 | 0.779 | 0.783 | 0.787 | 0.792 | 0.796 | 0.801 | 0.806 | 0.81  | 0.815 | 0.82  | 0.825 | 0.829 | 0.834 | 0.838 | 0.843 | 0.847 | 0.85  | 0.852 | 0.853 | 0.853 | 0.852 | 0.852 | 0.852 | 0.853 |       |
| Iceland        | 0.808 | 0.817 | 0.823 | 0.83  | 0.841 | 0.848 | 0.847 | 0.842 | 0.842 | 0.844 | 0.847 | 0.852 | 0.852 | 0.855 | 0.856 | 0.861 | 0.862 | 0.865 | 0.869 | 0.873 | 0.875 | 0.879 | 0.886 | 0.888 | 0.889 | 0.892 | 0.894 | 0.895 | 0.894 | 0.894 | 0.901 | 0.906 | 0.909 | 0.914 | 0.918 | 0.92  | 0.921 |       |
| Ireland        | 0.684 | 0.694 | 0.705 | 0.717 | 0.727 | 0.733 | 0.74  | 0.75  | 0.759 | 0.764 | 0.768 | 0.775 | 0.784 | 0.792 | 0.806 | 0.811 | 0.818 | 0.826 | 0.832 | 0.836 | 0.842 | 0.848 | 0.856 | 0.861 | 0.861 | 0.861 | 0.861 | 0.861 | 0.864 |       |       |       |       |       |       |       |       |       |

Appendix Table 11: Socio-Demographic Index values for all estimated GBD 2016 locations, 1980–2016

| Location                  | 1980  | 1981  | 1982  | 1983  | 1984  | 1985  | 1986  | 1987  | 1988  | 1989  | 1990  | 1991  | 1992  | 1993  | 1994  | 1995  | 1996  | 1997  | 1998  | 1999  | 2000  | 2001  | 2002  | 2003  | 2004  | 2005  | 2006  | 2007  | 2008  | 2009  | 2010  | 2011  | 2012  | 2013  | 2014  | 2015  | 2016  |
|---------------------------|-------|-------|-------|-------|-------|-------|-------|-------|-------|-------|-------|-------|-------|-------|-------|-------|-------|-------|-------|-------|-------|-------|-------|-------|-------|-------|-------|-------|-------|-------|-------|-------|-------|-------|-------|-------|-------|
| Middlesbrough             | 0.668 | 0.674 | 0.68  | 0.686 | 0.69  | 0.695 | 0.699 | 0.705 | 0.713 | 0.72  | 0.727 | 0.735 | 0.741 | 0.748 | 0.755 | 0.761 | 0.767 | 0.772 | 0.778 | 0.785 | 0.791 | 0.794 | 0.795 | 0.795 | 0.8   | 0.804 | 0.808 | 0.813 | 0.816 | 0.817 | 0.818 | 0.819 | 0.821 | 0.824 | 0.826 | 0.827 | 0.829 |
| South Tyneside            | 0.657 | 0.662 | 0.666 | 0.669 | 0.672 | 0.675 | 0.68  | 0.686 | 0.694 | 0.701 | 0.707 | 0.713 | 0.719 | 0.725 | 0.731 | 0.736 | 0.741 | 0.746 | 0.753 | 0.761 | 0.768 | 0.775 | 0.78  | 0.784 | 0.789 | 0.793 | 0.796 | 0.799 | 0.802 | 0.803 | 0.805 | 0.807 | 0.81  | 0.814 | 0.816 | 0.818 | 0.82  |
| Sunderland                | 0.676 | 0.683 | 0.689 | 0.694 | 0.7   | 0.706 | 0.712 | 0.718 | 0.725 | 0.731 | 0.736 | 0.742 | 0.748 | 0.754 | 0.761 | 0.767 | 0.772 | 0.778 | 0.785 | 0.791 | 0.798 | 0.804 | 0.809 | 0.812 | 0.816 | 0.82  | 0.823 | 0.826 | 0.829 | 0.83  | 0.831 | 0.832 | 0.835 | 0.838 | 0.841 | 0.844 | 0.845 |
| Hartlepool                | 0.672 | 0.678 | 0.683 | 0.687 | 0.691 | 0.695 | 0.7   | 0.704 | 0.711 | 0.718 | 0.723 | 0.728 | 0.734 | 0.74  | 0.746 | 0.753 | 0.759 | 0.765 | 0.77  | 0.777 | 0.782 | 0.785 | 0.787 | 0.788 | 0.79  | 0.793 | 0.795 | 0.799 | 0.802 | 0.805 | 0.807 | 0.81  | 0.814 | 0.819 | 0.82  | 0.821 | 0.821 |
| Cheshire East             | 0.726 | 0.732 | 0.737 | 0.742 | 0.747 | 0.753 | 0.758 | 0.764 | 0.769 | 0.774 | 0.778 | 0.783 | 0.788 | 0.795 | 0.802 | 0.809 | 0.815 | 0.821 | 0.826 | 0.832 | 0.837 | 0.842 | 0.845 | 0.845 | 0.847 | 0.848 | 0.848 | 0.847 | 0.848 | 0.851 | 0.854 | 0.858 | 0.863 | 0.869 | 0.872 | 0.873 | 0.874 |
| Stockport                 | 0.702 | 0.708 | 0.714 | 0.719 | 0.724 | 0.73  | 0.734 | 0.74  | 0.747 | 0.753 | 0.757 | 0.763 | 0.77  | 0.778 | 0.784 | 0.789 | 0.794 | 0.8   | 0.806 | 0.813 | 0.82  | 0.825 | 0.828 | 0.829 | 0.831 | 0.833 | 0.835 | 0.836 | 0.837 | 0.838 | 0.839 | 0.841 | 0.844 | 0.849 | 0.853 | 0.855 | 0.857 |
| Trafford                  | 0.726 | 0.732 | 0.737 | 0.741 | 0.745 | 0.75  | 0.755 | 0.76  | 0.767 | 0.772 | 0.777 | 0.784 | 0.791 | 0.799 | 0.806 | 0.812 | 0.816 | 0.821 | 0.828 | 0.835 | 0.841 | 0.846 | 0.849 | 0.851 | 0.854 | 0.855 | 0.855 | 0.856 | 0.858 | 0.86  | 0.864 | 0.868 | 0.872 | 0.877 | 0.88  | 0.882 | 0.883 |
| Cheshire West and Chester | 0.714 | 0.72  | 0.726 | 0.731 | 0.736 | 0.741 | 0.747 | 0.751 | 0.756 | 0.761 | 0.766 | 0.773 | 0.78  | 0.787 | 0.792 | 0.795 | 0.796 | 0.799 | 0.803 | 0.812 | 0.822 | 0.831 | 0.837 | 0.839 | 0.841 | 0.843 | 0.845 | 0.846 | 0.847 | 0.849 | 0.852 | 0.857 | 0.862 | 0.866 | 0.868 | 0.869 | 0.869 |
| Sefton                    | 0.682 | 0.688 | 0.693 | 0.698 | 0.704 | 0.709 | 0.715 | 0.72  | 0.725 | 0.73  | 0.734 | 0.74  | 0.747 | 0.754 | 0.761 | 0.767 | 0.771 | 0.777 | 0.783 | 0.789 | 0.795 | 0.8   | 0.803 | 0.805 | 0.809 | 0.811 | 0.812 | 0.813 | 0.813 | 0.814 | 0.816 | 0.818 | 0.82  | 0.823 | 0.824 | 0.825 | 0.826 |
| Lancashire                | 0.694 | 0.7   | 0.705 | 0.711 | 0.716 | 0.721 | 0.727 | 0.732 | 0.738 | 0.744 | 0.749 | 0.755 | 0.761 | 0.768 | 0.775 | 0.781 | 0.786 | 0.792 | 0.798 | 0.804 | 0.81  | 0.815 | 0.817 | 0.819 | 0.822 | 0.824 | 0.826 | 0.827 | 0.829 | 0.83  | 0.832 | 0.834 | 0.838 | 0.842 | 0.845 | 0.847 | 0.848 |
| Cumbria                   | 0.702 | 0.707 | 0.713 | 0.718 | 0.723 | 0.73  | 0.736 | 0.741 | 0.747 | 0.751 | 0.754 | 0.757 | 0.763 | 0.77  | 0.777 | 0.783 | 0.789 | 0.794 | 0.8   | 0.804 | 0.809 | 0.812 | 0.814 | 0.815 | 0.818 | 0.82  | 0.821 | 0.821 | 0.823 | 0.825 | 0.828 | 0.832 | 0.837 | 0.842 | 0.845 | 0.846 | 0.848 |
| Bolton                    | 0.678 | 0.684 | 0.69  | 0.695 | 0.701 | 0.707 | 0.713 | 0.719 | 0.725 | 0.73  | 0.735 | 0.741 | 0.747 | 0.754 | 0.761 | 0.766 | 0.77  | 0.774 | 0.78  | 0.786 | 0.791 | 0.795 | 0.797 | 0.798 | 0.8   | 0.8   | 0.8   | 0.8   | 0.802 | 0.804 | 0.807 | 0.81  | 0.814 | 0.819 | 0.821 | 0.823 | 0.824 |
| Wirral                    | 0.677 | 0.682 | 0.687 | 0.692 | 0.696 | 0.7   | 0.705 | 0.71  | 0.716 | 0.722 | 0.727 | 0.733 | 0.739 | 0.746 | 0.753 | 0.76  | 0.765 | 0.771 | 0.777 | 0.783 | 0.787 | 0.79  | 0.791 | 0.792 | 0.795 | 0.797 | 0.798 | 0.798 | 0.799 | 0.8   | 0.803 | 0.808 | 0.812 | 0.817 | 0.819 | 0.82  | 0.82  |
| Bury                      | 0.683 | 0.688 | 0.693 | 0.697 | 0.7   | 0.704 | 0.709 | 0.714 | 0.72  | 0.727 | 0.733 | 0.739 | 0.747 | 0.754 | 0.761 | 0.766 | 0.77  | 0.774 | 0.78  | 0.787 | 0.793 | 0.797 | 0.799 | 0.8   | 0.803 | 0.806 | 0.807 | 0.806 | 0.806 | 0.805 | 0.808 | 0.812 | 0.818 | 0.824 | 0.828 | 0.83  | 0.831 |
| St Helens                 | 0.67  | 0.675 | 0.681 | 0.686 | 0.691 | 0.697 | 0.703 | 0.709 | 0.715 | 0.72  | 0.727 | 0.733 | 0.739 | 0.745 | 0.75  | 0.755 | 0.76  | 0.766 | 0.772 | 0.778 | 0.786 | 0.79  | 0.792 | 0.796 | 0.799 | 0.801 | 0.804 | 0.806 | 0.808 | 0.81  | 0.812 | 0.816 | 0.822 | 0.826 | 0.828 | 0.83  | 0.831 |
| Warrington                | 0.719 | 0.724 | 0.73  | 0.735 | 0.741 | 0.747 | 0.753 | 0.759 | 0.766 | 0.771 | 0.777 | 0.783 | 0.789 | 0.796 | 0.802 | 0.807 | 0.812 | 0.817 | 0.824 | 0.83  | 0.836 | 0.841 | 0.844 | 0.847 | 0.85  | 0.852 | 0.852 | 0.852 | 0.854 | 0.858 | 0.862 | 0.867 | 0.873 | 0.875 | 0.877 | 0.878 |       |
| Oldham                    | 0.669 | 0.674 | 0.679 | 0.684 | 0.689 | 0.694 | 0.699 | 0.704 | 0.71  | 0.715 | 0.72  | 0.725 | 0.731 | 0.738 | 0.743 | 0.747 | 0.751 | 0.754 | 0.758 | 0.763 | 0.769 | 0.773 | 0.775 | 0.776 | 0.778 | 0.78  | 0.782 | 0.784 | 0.787 | 0.789 | 0.792 | 0.796 | 0.8   | 0.804 | 0.806 | 0.807 | 0.808 |
| Rochdale                  | 0.668 | 0.673 | 0.679 | 0.684 | 0.688 | 0.694 | 0.7   | 0.705 | 0.712 | 0.716 | 0.72  | 0.725 | 0.731 | 0.737 | 0.744 | 0.75  | 0.755 | 0.76  | 0.767 | 0.773 | 0.779 | 0.783 | 0.784 | 0.785 | 0.787 | 0.788 | 0.788 | 0.788 | 0.789 | 0.791 | 0.795 | 0.8   | 0.805 | 0.81  | 0.813 | 0.814 | 0.814 |
| Wigan                     | 0.671 | 0.676 | 0.682 | 0.687 | 0.692 | 0.698 | 0.704 | 0.71  | 0.716 | 0.722 | 0.727 | 0.733 | 0.739 | 0.746 | 0.752 | 0.758 | 0.763 | 0.769 | 0.774 | 0.779 | 0.785 | 0.789 | 0.791 | 0.793 | 0.795 | 0.797 | 0.798 | 0.799 | 0.8   | 0.801 | 0.804 | 0.807 | 0.811 | 0.816 | 0.82  | 0.822 | 0.824 |
| Halton                    | 0.69  | 0.695 | 0.7   | 0.704 | 0.707 | 0.711 | 0.715 | 0.72  | 0.727 | 0.734 | 0.739 | 0.745 | 0.752 | 0.759 | 0.767 | 0.773 | 0.778 | 0.782 | 0.786 | 0.792 | 0.8   | 0.806 | 0.81  | 0.811 | 0.812 | 0.814 | 0.816 | 0.818 | 0.82  | 0.822 | 0.827 | 0.832 | 0.836 | 0.842 | 0.847 | 0.85  | 0.853 |
| Liverpool                 | 0.688 | 0.693 | 0.698 | 0.702 | 0.705 | 0.709 | 0.712 | 0.716 | 0.722 | 0.729 | 0.738 | 0.75  | 0.76  | 0.767 | 0.773 | 0.777 | 0.781 | 0.787 | 0.794 | 0.803 | 0.812 | 0.818 | 0.824 | 0.83  | 0.836 | 0.839 | 0.842 | 0.844 | 0.848 | 0.852 | 0.855 | 0.859 | 0.862 | 0.865 | 0.867 | 0.868 | 0.87  |
| Tameside                  | 0.672 | 0.678 | 0.683 | 0.688 | 0.692 | 0.697 | 0.702 | 0.707 | 0.713 | 0.719 | 0.724 | 0.73  | 0.737 | 0.744 | 0.751 | 0.756 | 0.761 | 0.766 | 0.771 | 0.778 | 0.786 | 0.792 | 0.795 | 0.797 | 0.8   | 0.802 | 0.801 | 0.801 | 0.8   | 0.8   | 0.802 | 0.805 | 0.809 | 0.813 | 0.816 | 0.818 | 0.82  |
| Salford                   | 0.691 | 0.696 | 0.701 | 0.706 | 0.71  | 0.714 | 0.719 | 0.723 | 0.728 | 0.732 | 0.737 | 0.744 | 0.752 | 0.761 | 0.769 | 0.775 | 0.78  | 0.784 | 0.791 | 0.799 | 0.807 | 0.814 | 0.818 | 0.821 | 0.825 | 0.828 | 0.831 | 0.832 | 0.834 | 0.835 | 0.839 | 0.843 | 0.848 | 0.853 | 0.856 | 0.859 | 0.861 |
| Blackburn with Darwen     | 0.669 | 0.675 | 0.68  | 0.685 | 0.689 | 0.694 | 0.698 | 0.702 | 0.709 | 0.715 | 0.72  | 0.726 | 0.733 | 0.739 | 0.745 | 0.75  | 0.755 | 0.76  | 0.765 | 0.77  | 0.775 | 0.779 | 0.781 | 0.782 | 0.784 | 0.786 | 0.786 | 0.787 | 0.791 | 0.794 | 0.798 | 0.802 | 0.807 | 0.812 | 0.816 | 0.818 | 0.82  |
| Knowsley                  | 0.665 | 0.672 | 0.678 | 0.683 | 0.689 | 0.694 | 0.7   | 0.704 | 0.71  | 0.715 | 0.72  | 0.727 | 0.733 | 0.739 | 0.744 | 0.75  | 0.755 | 0.762 | 0.768 | 0.774 | 0.781 | 0.787 | 0.791 | 0.792 | 0.795 | 0.799 | 0.803 | 0.807 | 0.811 | 0.813 | 0.816 | 0.819 | 0.822 | 0.828 | 0.832 | 0.834 | 0.837 |
| Blackpool                 | 0.667 | 0.673 | 0.679 | 0.685 | 0.688 | 0.69  | 0.691 | 0.693 | 0.699 | 0.704 | 0.711 | 0.722 | 0.732 | 0.74  | 0.746 | 0.751 | 0.754 | 0.759 | 0.766 | 0.773 | 0.778 | 0.782 | 0.786 | 0.788 | 0.789 | 0.79  | 0.792 | 0.792 | 0.792 | 0.792 | 0.792 | 0.792 | 0.792 | 0.792 | 0.792 | 0.792 | 0.792 |
| Manchester                | 0.715 | 0.721 | 0.726 | 0.731 | 0.734 | 0.739 | 0.744 | 0.749 | 0.755 | 0.761 | 0.768 | 0.775 | 0.781 | 0.789 | 0.796 | 0.801 | 0.806 | 0.812 | 0.819 | 0.829 | 0.839 | 0.847 | 0.853 | 0.857 | 0.862 | 0.866 | 0.869 | 0.872 | 0.875 | 0.878 | 0.882 | 0.884 | 0.888 | 0.892 | 0.895 | 0.897 | 0.899 |
| North Yorkshire           | 0.707 | 0.712 | 0.718 | 0.724 | 0.73  | 0.736 | 0.742 | 0.747 | 0.754 | 0.759 | 0.762 | 0.765 | 0.769 | 0.774 | 0.78  | 0.785 | 0.79  | 0.796 | 0.802 | 0.808 | 0.815 | 0.819 | 0.821 | 0.822 | 0.826 | 0.829 | 0.831 | 0.833 | 0.834 | 0.835 | 0.838 | 0.841 | 0.844 | 0.848 | 0.849 | 0.849 | 0.85  |
| East Riding of Yorkshire  | 0.696 | 0.702 | 0.708 | 0.714 | 0.72  | 0.726 | 0.732 | 0.737 | 0.743 | 0.748 | 0.752 | 0.758 | 0.765 | 0.771 | 0.777 | 0.782 | 0.788 | 0.793 | 0.799 | 0.804 | 0.809 | 0.81  | 0.811 | 0.812 | 0.815 | 0.818 | 0.819 | 0.821 | 0.823 | 0.825 | 0.827 | 0.828 | 0.831 | 0.834 | 0.836 | 0.837 | 0.839 |
| York                      | 0.729 | 0.735 | 0.74  | 0.745 | 0.749 | 0.753 | 0.756 | 0.76  | 0.766 | 0.773 | 0.781 | 0.79  | 0.799 | 0.804 | 0.81  | 0.815 | 0.819 | 0.824 | 0.831 | 0.836 | 0.842 | 0.848 | 0.854 | 0.86  | 0.865 | 0.87  | 0.873 | 0.877 | 0.88  | 0.881 | 0.883 | 0.885 | 0.886 | 0.888 | 0.89  | 0.892 | 0.894 |
| North East Lincolnshire   | 0.693 | 0.698 | 0.703 | 0.706 | 0.709 | 0.714 | 0.721 | 0.728 | 0.736 | 0.744 | 0.743 | 0.748 | 0.755 | 0.762 | 0.769 | 0.773 | 0.776 | 0.779 | 0.784 | 0.789 | 0.795 | 0.801 | 0.802 | 0.803 | 0.805 | 0.808 | 0.813 | 0.817 | 0.822 | 0.825 | 0.828 | 0.831 | 0.833 | 0.834 | 0.834 | 0.834 | 0.834 |
| Calderdale                | 0.688 | 0.694 | 0.699 | 0.704 | 0.709 | 0.716 | 0.722 | 0.729 | 0.736 | 0.741 | 0.746 | 0.75  | 0.755 | 0.761 | 0.767 | 0.773 | 0.777 | 0.783 | 0.788 | 0.795 | 0.801 | 0.80  |       |       |       |       |       |       |       |       |       |       |       |       |       |       |       |

Appendix Table 11: Socio-Demographic Index values for all estimated GBD 2016 locations, 1980–2016

| Location               | 1980  | 1981  | 1982  | 1983  | 1984  | 1985  | 1986  | 1987  | 1988  | 1989  | 1990  | 1991  | 1992  | 1993  | 1994  | 1995  | 1996  | 1997  | 1998  | 1999  | 2000  | 2001  | 2002  | 2003  | 2004  | 2005  | 2006  | 2007  | 2008  | 2009  | 2010  | 2011  | 2012  | 2013  | 2014  | 2015  | 2016  |       |       |
|------------------------|-------|-------|-------|-------|-------|-------|-------|-------|-------|-------|-------|-------|-------|-------|-------|-------|-------|-------|-------|-------|-------|-------|-------|-------|-------|-------|-------|-------|-------|-------|-------|-------|-------|-------|-------|-------|-------|-------|-------|
| Dudley                 | 0.677 | 0.682 | 0.688 | 0.693 | 0.698 | 0.703 | 0.708 | 0.714 | 0.721 | 0.726 | 0.731 | 0.736 | 0.741 | 0.747 | 0.753 | 0.757 | 0.762 | 0.767 | 0.772 | 0.778 | 0.784 | 0.789 | 0.792 | 0.794 | 0.797 | 0.8   | 0.802 | 0.804 | 0.806 | 0.806 | 0.807 | 0.808 | 0.81  | 0.814 | 0.816 | 0.817 | 0.818 |       |       |
| Coventry               | 0.697 | 0.702 | 0.707 | 0.711 | 0.715 | 0.719 | 0.724 | 0.729 | 0.735 | 0.742 | 0.75  | 0.757 | 0.764 | 0.771 | 0.777 | 0.782 | 0.787 | 0.792 | 0.797 | 0.805 | 0.812 | 0.819 | 0.823 | 0.826 | 0.83  | 0.833 | 0.835 | 0.836 | 0.837 | 0.838 | 0.84  | 0.843 | 0.848 | 0.855 | 0.86  | 0.863 | 0.866 |       |       |
| Telford and Wrekin     | 0.698 | 0.704 | 0.71  | 0.716 | 0.721 | 0.726 | 0.731 | 0.736 | 0.742 | 0.747 | 0.752 | 0.757 | 0.763 | 0.769 | 0.775 | 0.78  | 0.785 | 0.792 | 0.798 | 0.804 | 0.81  | 0.815 | 0.817 | 0.818 | 0.818 | 0.818 | 0.818 | 0.818 | 0.818 | 0.821 | 0.822 | 0.824 | 0.828 | 0.833 | 0.838 | 0.842 | 0.845 | 0.846 |       |
| Stoke-on-Trent         | 0.67  | 0.676 | 0.681 | 0.686 | 0.691 | 0.697 | 0.701 | 0.705 | 0.71  | 0.716 | 0.724 | 0.733 | 0.742 | 0.749 | 0.756 | 0.761 | 0.766 | 0.772 | 0.777 | 0.783 | 0.788 | 0.79  | 0.789 | 0.788 | 0.789 | 0.791 | 0.791 | 0.79  | 0.793 | 0.796 | 0.8   | 0.804 | 0.809 | 0.815 | 0.819 | 0.823 | 0.827 |       |       |
| Walsall                | 0.667 | 0.672 | 0.677 | 0.682 | 0.686 | 0.691 | 0.697 | 0.702 | 0.709 | 0.714 | 0.718 | 0.722 | 0.728 | 0.735 | 0.741 | 0.744 | 0.746 | 0.747 | 0.752 | 0.759 | 0.766 | 0.771 | 0.773 | 0.773 | 0.776 | 0.777 | 0.781 | 0.784 | 0.786 | 0.788 | 0.792 | 0.796 | 0.8   | 0.804 | 0.809 | 0.815 | 0.819 | 0.823 | 0.827 |
| Wolverhampton          | 0.678 | 0.684 | 0.689 | 0.693 | 0.698 | 0.703 | 0.707 | 0.712 | 0.717 | 0.723 | 0.728 | 0.734 | 0.741 | 0.747 | 0.753 | 0.757 | 0.761 | 0.766 | 0.772 | 0.778 | 0.783 | 0.788 | 0.795 | 0.799 | 0.8   | 0.803 | 0.806 | 0.807 | 0.808 | 0.808 | 0.81  | 0.813 | 0.816 | 0.82  | 0.825 | 0.827 | 0.829 | 0.83  |       |
| Birmingham             | 0.68  | 0.686 | 0.691 | 0.696 | 0.7   | 0.705 | 0.71  | 0.714 | 0.72  | 0.727 | 0.733 | 0.742 | 0.75  | 0.757 | 0.763 | 0.767 | 0.771 | 0.775 | 0.781 | 0.788 | 0.795 | 0.801 | 0.805 | 0.808 | 0.812 | 0.817 | 0.819 | 0.822 | 0.826 | 0.829 | 0.832 | 0.833 | 0.836 | 0.84  | 0.843 | 0.845 | 0.847 |       |       |
| Sandwell               | 0.666 | 0.671 | 0.677 | 0.682 | 0.686 | 0.691 | 0.696 | 0.701 | 0.708 | 0.714 | 0.719 | 0.725 | 0.732 | 0.739 | 0.745 | 0.749 | 0.753 | 0.758 | 0.763 | 0.768 | 0.773 | 0.778 | 0.781 | 0.782 | 0.785 | 0.787 | 0.788 | 0.789 | 0.79  | 0.791 | 0.794 | 0.797 | 0.803 | 0.808 | 0.812 | 0.813 | 0.815 | 0.815 |       |
| Bedford                | 0.711 | 0.717 | 0.723 | 0.728 | 0.733 | 0.739 | 0.745 | 0.75  | 0.757 | 0.764 | 0.771 | 0.776 | 0.781 | 0.784 | 0.788 | 0.791 | 0.795 | 0.801 | 0.807 | 0.814 | 0.822 | 0.828 | 0.831 | 0.833 | 0.836 | 0.839 | 0.841 | 0.842 | 0.843 | 0.844 | 0.845 | 0.846 | 0.848 | 0.85  | 0.851 | 0.851 | 0.851 |       |       |
| Central Bedfordshire   | 0.709 | 0.715 | 0.72  | 0.725 | 0.73  | 0.735 | 0.741 | 0.747 | 0.754 | 0.759 | 0.765 | 0.77  | 0.775 | 0.781 | 0.788 | 0.794 | 0.8   | 0.806 | 0.811 | 0.815 | 0.818 | 0.82  | 0.822 | 0.823 | 0.827 | 0.829 | 0.83  | 0.831 | 0.831 | 0.831 | 0.832 | 0.834 | 0.838 | 0.844 | 0.848 | 0.85  | 0.853 |       |       |
| Suffolk                | 0.703 | 0.709 | 0.715 | 0.72  | 0.725 | 0.731 | 0.736 | 0.74  | 0.746 | 0.752 | 0.757 | 0.763 | 0.768 | 0.773 | 0.78  | 0.786 | 0.791 | 0.797 | 0.802 | 0.807 | 0.811 | 0.814 | 0.814 | 0.814 | 0.817 | 0.82  | 0.822 | 0.823 | 0.824 | 0.825 | 0.827 | 0.83  | 0.833 | 0.837 | 0.838 | 0.839 | 0.84  |       |       |
| Hertfordshire          | 0.731 | 0.737 | 0.743 | 0.748 | 0.753 | 0.757 | 0.76  | 0.764 | 0.769 | 0.775 | 0.781 | 0.788 | 0.795 | 0.801 | 0.806 | 0.812 | 0.816 | 0.822 | 0.828 | 0.836 | 0.843 | 0.848 | 0.851 | 0.853 | 0.855 | 0.858 | 0.858 | 0.859 | 0.861 | 0.862 | 0.864 | 0.866 | 0.869 | 0.874 | 0.876 | 0.878 | 0.879 |       |       |
| Essex                  | 0.701 | 0.706 | 0.712 | 0.717 | 0.722 | 0.726 | 0.73  | 0.734 | 0.739 | 0.745 | 0.75  | 0.757 | 0.763 | 0.768 | 0.774 | 0.779 | 0.784 | 0.79  | 0.796 | 0.802 | 0.808 | 0.812 | 0.814 | 0.816 | 0.819 | 0.823 | 0.825 | 0.828 | 0.83  | 0.833 | 0.833 | 0.836 | 0.84  | 0.842 | 0.844 | 0.845 |       |       |       |
| Cambridgeshire         | 0.728 | 0.734 | 0.74  | 0.745 | 0.749 | 0.755 | 0.76  | 0.765 | 0.771 | 0.777 | 0.783 | 0.789 | 0.796 | 0.801 | 0.807 | 0.814 | 0.82  | 0.827 | 0.833 | 0.838 | 0.844 | 0.849 | 0.854 | 0.856 | 0.86  | 0.862 | 0.862 | 0.862 | 0.862 | 0.863 | 0.867 | 0.87  | 0.874 | 0.878 | 0.88  | 0.881 | 0.882 |       |       |
| Thurrock               | 0.702 | 0.708 | 0.711 | 0.715 | 0.717 | 0.72  | 0.723 | 0.726 | 0.733 | 0.741 | 0.75  | 0.759 | 0.765 | 0.77  | 0.775 | 0.78  | 0.783 | 0.787 | 0.793 | 0.799 | 0.806 | 0.811 | 0.812 | 0.812 | 0.813 | 0.813 | 0.813 | 0.814 | 0.816 | 0.819 | 0.821 | 0.822 | 0.823 | 0.825 | 0.826 | 0.825 | 0.824 |       |       |
| Norfolk                | 0.702 | 0.708 | 0.714 | 0.719 | 0.723 | 0.728 | 0.733 | 0.737 | 0.743 | 0.749 | 0.754 | 0.759 | 0.764 | 0.77  | 0.775 | 0.781 | 0.786 | 0.792 | 0.798 | 0.804 | 0.81  | 0.814 | 0.817 | 0.818 | 0.821 | 0.824 | 0.826 | 0.828 | 0.83  | 0.831 | 0.832 | 0.833 | 0.836 | 0.841 | 0.844 | 0.846 | 0.848 |       |       |
| Southend-on-Sea        | 0.683 | 0.688 | 0.693 | 0.696 | 0.699 | 0.703 | 0.709 | 0.716 | 0.724 | 0.731 | 0.736 | 0.742 | 0.749 | 0.757 | 0.765 | 0.772 | 0.778 | 0.785 | 0.79  | 0.794 | 0.796 | 0.797 | 0.798 | 0.799 | 0.802 | 0.804 | 0.804 | 0.806 | 0.809 | 0.813 | 0.817 | 0.819 | 0.822 | 0.825 | 0.827 | 0.827 | 0.828 |       |       |
| Peterborough           | 0.713 | 0.719 | 0.724 | 0.728 | 0.732 | 0.737 | 0.742 | 0.747 | 0.753 | 0.759 | 0.763 | 0.767 | 0.773 | 0.778 | 0.785 | 0.79  | 0.794 | 0.798 | 0.803 | 0.809 | 0.815 | 0.819 | 0.818 | 0.816 | 0.816 | 0.816 | 0.816 | 0.816 | 0.816 | 0.816 | 0.818 | 0.823 | 0.828 | 0.831 | 0.835 | 0.837 | 0.838 | 0.839 |       |
| Luton                  | 0.692 | 0.698 | 0.703 | 0.707 | 0.71  | 0.713 | 0.715 | 0.717 | 0.725 | 0.733 | 0.743 | 0.752 | 0.759 | 0.765 | 0.771 | 0.775 | 0.779 | 0.783 | 0.787 | 0.793 | 0.798 | 0.803 | 0.809 | 0.816 | 0.816 | 0.816 | 0.816 | 0.816 | 0.816 | 0.818 | 0.823 | 0.829 | 0.834 | 0.837 | 0.84  | 0.843 | 0.844 | 0.845 |       |
| Richmond upon Thames   | 0.76  | 0.766 | 0.771 | 0.775 | 0.779 | 0.783 | 0.787 | 0.791 | 0.798 | 0.805 | 0.813 | 0.82  | 0.827 | 0.833 | 0.839 | 0.845 | 0.85  | 0.855 | 0.861 | 0.868 | 0.873 | 0.878 | 0.882 | 0.885 | 0.887 | 0.888 | 0.887 | 0.887 | 0.888 | 0.888 | 0.889 | 0.891 | 0.895 | 0.9   | 0.905 | 0.908 | 0.91  |       |       |
| Kensington and Chelsea | 0.798 | 0.804 | 0.809 | 0.815 | 0.82  | 0.826 | 0.832 | 0.837 | 0.84  | 0.848 | 0.855 | 0.861 | 0.866 | 0.871 | 0.875 | 0.88  | 0.884 | 0.889 | 0.894 | 0.9   | 0.906 | 0.91  | 0.914 | 0.917 | 0.921 | 0.924 | 0.927 | 0.929 | 0.932 | 0.934 | 0.936 | 0.938 | 0.94  | 0.941 | 0.942 | 0.943 | 0.945 |       |       |
| Barnet                 | 0.729 | 0.735 | 0.742 | 0.748 | 0.753 | 0.759 | 0.764 | 0.769 | 0.775 | 0.782 | 0.787 | 0.792 | 0.797 | 0.803 | 0.81  | 0.816 | 0.823 | 0.829 | 0.835 | 0.841 | 0.846 | 0.851 | 0.853 | 0.854 | 0.855 | 0.855 | 0.854 | 0.853 | 0.855 | 0.857 | 0.86  | 0.865 | 0.87  | 0.875 | 0.878 | 0.879 | 0.88  |       |       |
| Westminster            | 0.808 | 0.812 | 0.817 | 0.821 | 0.825 | 0.829 | 0.831 | 0.832 | 0.837 | 0.844 | 0.853 | 0.86  | 0.865 | 0.869 | 0.873 | 0.877 | 0.882 | 0.886 | 0.891 | 0.896 | 0.901 | 0.906 | 0.91  | 0.914 | 0.918 | 0.921 | 0.924 | 0.927 | 0.929 | 0.931 | 0.933 | 0.935 | 0.936 | 0.938 | 0.939 | 0.941 | 0.943 |       |       |
| Bromley                | 0.73  | 0.736 | 0.741 | 0.746 | 0.749 | 0.753 | 0.757 | 0.761 | 0.767 | 0.774 | 0.779 | 0.784 | 0.789 | 0.793 | 0.799 | 0.804 | 0.809 | 0.815 | 0.821 | 0.829 | 0.835 | 0.839 | 0.842 | 0.844 | 0.846 | 0.847 | 0.848 | 0.85  | 0.851 | 0.851 | 0.851 | 0.851 | 0.853 | 0.857 | 0.86  | 0.862 | 0.863 |       |       |
| Bexley                 | 0.701 | 0.707 | 0.713 | 0.718 | 0.722 | 0.726 | 0.73  | 0.733 | 0.739 | 0.744 | 0.749 | 0.756 | 0.762 | 0.768 | 0.774 | 0.778 | 0.781 | 0.784 | 0.789 | 0.795 | 0.801 | 0.806 | 0.809 | 0.811 | 0.814 | 0.815 | 0.815 | 0.817 | 0.819 | 0.821 | 0.823 | 0.824 | 0.828 | 0.833 | 0.836 | 0.838 | 0.84  |       |       |
| Redbridge              | 0.702 | 0.708 | 0.713 | 0.718 | 0.723 | 0.728 | 0.733 | 0.737 | 0.743 | 0.749 | 0.756 | 0.762 | 0.767 | 0.772 | 0.777 | 0.782 | 0.787 | 0.792 | 0.797 | 0.804 | 0.81  | 0.815 | 0.818 | 0.82  | 0.822 | 0.823 | 0.824 | 0.827 | 0.83  | 0.831 | 0.831 | 0.834 | 0.837 | 0.84  | 0.841 | 0.843 | 0.843 |       |       |
| Merton                 | 0.726 | 0.732 | 0.737 | 0.74  | 0.743 | 0.747 | 0.752 | 0.757 | 0.765 | 0.773 | 0.782 | 0.792 | 0.8   | 0.807 | 0.813 | 0.818 | 0.823 | 0.828 | 0.836 | 0.845 | 0.852 | 0.857 | 0.859 | 0.861 | 0.863 | 0.865 | 0.866 | 0.867 | 0.869 | 0.87  | 0.871 | 0.874 | 0.879 | 0.881 | 0.882 | 0.884 | 0.884 |       |       |
| Brent                  | 0.724 | 0.73  | 0.736 | 0.741 | 0.746 | 0.752 | 0.759 | 0.765 | 0.773 | 0.779 | 0.784 | 0.788 | 0.792 | 0.797 | 0.802 | 0.807 | 0.811 | 0.815 | 0.82  | 0.826 | 0.834 | 0.841 | 0.845 | 0.846 | 0.847 | 0.846 | 0.843 | 0.836 | 0.832 | 0.832 | 0.84  | 0.85  | 0.858 | 0.864 | 0.866 | 0.865 | 0.865 |       |       |
| Hillingdon             | 0.756 | 0.762 | 0.767 | 0.772 | 0.776 | 0.78  | 0.784 | 0.788 | 0.793 | 0.801 | 0.807 | 0.814 | 0.821 | 0.827 | 0.834 | 0.844 | 0.848 | 0.853 | 0.859 | 0.864 | 0.866 | 0.868 | 0.869 | 0.871 | 0.871 | 0.871 | 0.871 | 0.871 | 0.872 | 0.874 | 0.876 | 0.878 | 0.882 | 0.888 | 0.892 | 0.895 | 0.897 |       |       |
| Havering               | 0.703 | 0.709 | 0.715 | 0.72  | 0.724 | 0.728 | 0.732 | 0.735 | 0.74  | 0.745 | 0.75  | 0.756 | 0.762 | 0.768 | 0.774 | 0.778 | 0.783 | 0.787 | 0.792 | 0.798 | 0.803 | 0.808 | 0.81  | 0.812 | 0.815 | 0.818 | 0.82  | 0.822 | 0.825 | 0.827 | 0.828 | 0.829 | 0.83  | 0.833 | 0.835 | 0.836 | 0.837 |       |       |
| Kingston upon Thames   | 0.746 | 0.752 | 0.758 | 0.762 | 0.766 | 0.77  | 0.774 | 0.779 | 0.784 | 0.789 | 0.796 | 0.804 | 0.811 | 0.818 | 0.823 | 0.828 | 0.832 | 0.837 | 0.842 | 0.85  | 0.858 | 0.864 | 0.869 | 0.874 | 0.878 | 0.881 | 0.884 | 0.886 | 0.888 | 0.891 | 0.892 | 0.892 | 0.895 | 0.898 | 0.9   | 0.901 | 0.902 |       |       |
| Sutton                 | 0.714 | 0.72  | 0.726 | 0.73  | 0.734 | 0.737 | 0.739 | 0.743 | 0.749 | 0.756 | 0.762 |       |       |       |       |       |       |       |       |       |       |       |       |       |       |       |       |       |       |       |       |       |       |       |       |       |       |       |       |



Appendix Table 11: Socio-Demographic Index values for all estimated GBD 2016 locations, 1980–2016

| Location                     | 1980  | 1981  | 1982  | 1983  | 1984  | 1985  | 1986  | 1987  | 1988  | 1989  | 1990  | 1991  | 1992  | 1993  | 1994  | 1995  | 1996  | 1997  | 1998  | 1999  | 2000  | 2001  | 2002  | 2003  | 2004  | 2005  | 2006  | 2007  | 2008  | 2009  | 2010  | 2011  | 2012  | 2013  | 2014  | 2015  | 2016  |       |       |  |
|------------------------------|-------|-------|-------|-------|-------|-------|-------|-------|-------|-------|-------|-------|-------|-------|-------|-------|-------|-------|-------|-------|-------|-------|-------|-------|-------|-------|-------|-------|-------|-------|-------|-------|-------|-------|-------|-------|-------|-------|-------|--|
| Bracknell Forest             | 0.733 | 0.74  | 0.746 | 0.753 | 0.76  | 0.766 | 0.771 | 0.777 | 0.784 | 0.791 | 0.796 | 0.799 | 0.804 | 0.808 | 0.814 | 0.82  | 0.824 | 0.828 | 0.833 | 0.838 | 0.842 | 0.849 | 0.855 | 0.858 | 0.86  | 0.863 | 0.866 | 0.868 | 0.87  | 0.871 | 0.872 | 0.873 | 0.874 | 0.878 | 0.882 | 0.885 | 0.887 | 0.888 |       |  |
| West Sussex                  | 0.72  | 0.726 | 0.731 | 0.737 | 0.741 | 0.746 | 0.75  | 0.753 | 0.759 | 0.764 | 0.769 | 0.774 | 0.78  | 0.786 | 0.792 | 0.797 | 0.803 | 0.808 | 0.813 | 0.819 | 0.824 | 0.827 | 0.828 | 0.829 | 0.831 | 0.832 | 0.834 | 0.835 | 0.836 | 0.838 | 0.841 | 0.844 | 0.847 | 0.852 | 0.854 | 0.855 | 0.856 |       |       |  |
| Oxfordshire                  | 0.745 | 0.751 | 0.757 | 0.762 | 0.767 | 0.773 | 0.778 | 0.782 | 0.786 | 0.79  | 0.794 | 0.799 | 0.805 | 0.81  | 0.816 | 0.822 | 0.827 | 0.832 | 0.838 | 0.845 | 0.851 | 0.856 | 0.858 | 0.86  | 0.863 | 0.865 | 0.866 | 0.866 | 0.867 | 0.868 | 0.87  | 0.874 | 0.879 | 0.884 | 0.887 | 0.889 | 0.89  |       |       |  |
| Reading                      | 0.753 | 0.759 | 0.764 | 0.769 | 0.772 | 0.775 | 0.779 | 0.783 | 0.79  | 0.798 | 0.806 | 0.815 | 0.822 | 0.827 | 0.832 | 0.837 | 0.842 | 0.847 | 0.853 | 0.861 | 0.869 | 0.876 | 0.88  | 0.882 | 0.885 | 0.886 | 0.884 | 0.883 | 0.884 | 0.886 | 0.89  | 0.893 | 0.897 | 0.901 | 0.904 | 0.905 | 0.906 |       |       |  |
| Kent                         | 0.71  | 0.716 | 0.721 | 0.726 | 0.729 | 0.733 | 0.736 | 0.74  | 0.745 | 0.75  | 0.755 | 0.76  | 0.765 | 0.771 | 0.776 | 0.781 | 0.786 | 0.791 | 0.797 | 0.803 | 0.808 | 0.814 | 0.815 | 0.816 | 0.818 | 0.821 | 0.822 | 0.823 | 0.824 | 0.826 | 0.827 | 0.829 | 0.832 | 0.835 | 0.839 | 0.84  | 0.844 | 0.845 |       |  |
| Brighton and Hove            | 0.73  | 0.735 | 0.74  | 0.743 | 0.745 | 0.748 | 0.751 | 0.755 | 0.763 | 0.771 | 0.781 | 0.79  | 0.797 | 0.803 | 0.808 | 0.813 | 0.819 | 0.824 | 0.829 | 0.834 | 0.839 | 0.845 | 0.851 | 0.857 | 0.862 | 0.867 | 0.872 | 0.874 | 0.877 | 0.88  | 0.884 | 0.887 | 0.889 | 0.891 | 0.894 | 0.896 | 0.899 |       |       |  |
| Medway                       | 0.686 | 0.691 | 0.697 | 0.701 | 0.706 | 0.71  | 0.715 | 0.72  | 0.727 | 0.733 | 0.738 | 0.744 | 0.749 | 0.753 | 0.758 | 0.763 | 0.769 | 0.774 | 0.78  | 0.785 | 0.791 | 0.796 | 0.799 | 0.801 | 0.804 | 0.807 | 0.81  | 0.811 | 0.813 | 0.813 | 0.815 | 0.816 | 0.82  | 0.824 | 0.827 | 0.829 | 0.831 |       |       |  |
| East Sussex                  | 0.696 | 0.702 | 0.708 | 0.713 | 0.718 | 0.723 | 0.728 | 0.732 | 0.737 | 0.742 | 0.746 | 0.75  | 0.755 | 0.759 | 0.765 | 0.77  | 0.776 | 0.781 | 0.786 | 0.791 | 0.796 | 0.799 | 0.8   | 0.801 | 0.803 | 0.806 | 0.807 | 0.808 | 0.809 | 0.81  | 0.813 | 0.817 | 0.821 | 0.826 | 0.83  | 0.832 | 0.834 |       |       |  |
| Portsmouth                   | 0.728 | 0.734 | 0.74  | 0.744 | 0.746 | 0.748 | 0.751 | 0.754 | 0.76  | 0.768 | 0.776 | 0.784 | 0.791 | 0.797 | 0.802 | 0.806 | 0.81  | 0.815 | 0.821 | 0.828 | 0.836 | 0.843 | 0.849 | 0.853 | 0.858 | 0.861 | 0.864 | 0.867 | 0.869 | 0.87  | 0.87  | 0.878 | 0.869 | 0.871 | 0.873 | 0.876 | 0.878 |       |       |  |
| Isle of Wight                | 0.695 | 0.7   | 0.706 | 0.71  | 0.714 | 0.719 | 0.724 | 0.73  | 0.737 | 0.741 | 0.744 | 0.746 | 0.748 | 0.751 | 0.756 | 0.762 | 0.768 | 0.774 | 0.78  | 0.787 | 0.795 | 0.804 | 0.809 | 0.811 | 0.812 | 0.813 | 0.814 | 0.816 | 0.818 | 0.819 | 0.821 | 0.823 | 0.826 | 0.829 | 0.831 | 0.833 | 0.835 |       |       |  |
| Milton Keynes                | 0.757 | 0.761 | 0.766 | 0.762 | 0.763 | 0.768 | 0.775 | 0.783 | 0.79  | 0.795 | 0.796 | 0.799 | 0.804 | 0.811 | 0.818 | 0.825 | 0.83  | 0.835 | 0.839 | 0.843 | 0.847 | 0.85  | 0.85  | 0.85  | 0.853 | 0.855 | 0.856 | 0.855 | 0.855 | 0.856 | 0.856 | 0.856 | 0.856 | 0.856 | 0.856 | 0.856 | 0.856 | 0.856 |       |  |
| Southampton                  | 0.728 | 0.734 | 0.739 | 0.743 | 0.746 | 0.748 | 0.749 | 0.75  | 0.754 | 0.761 | 0.771 | 0.782 | 0.79  | 0.798 | 0.804 | 0.81  | 0.814 | 0.819 | 0.825 | 0.832 | 0.84  | 0.845 | 0.849 | 0.854 | 0.858 | 0.863 | 0.866 | 0.868 | 0.869 | 0.868 | 0.867 | 0.866 | 0.867 | 0.871 | 0.874 | 0.878 | 0.88  | 0.88  |       |  |
| Slough                       | 0.749 | 0.753 | 0.756 | 0.757 | 0.759 | 0.762 | 0.766 | 0.771 | 0.779 | 0.787 | 0.795 | 0.805 | 0.812 | 0.818 | 0.824 | 0.83  | 0.836 | 0.84  | 0.844 | 0.847 | 0.852 | 0.855 | 0.854 | 0.851 | 0.848 | 0.846 | 0.843 | 0.845 | 0.85  | 0.855 | 0.861 | 0.866 | 0.871 | 0.874 | 0.875 | 0.874 | 0.873 |       |       |  |
| South Gloucestershire        | 0.731 | 0.737 | 0.742 | 0.747 | 0.751 | 0.756 | 0.762 | 0.767 | 0.774 | 0.779 | 0.783 | 0.787 | 0.791 | 0.795 | 0.799 | 0.803 | 0.809 | 0.816 | 0.824 | 0.832 | 0.839 | 0.844 | 0.846 | 0.848 | 0.851 | 0.855 | 0.858 | 0.861 | 0.865 | 0.866 | 0.867 | 0.868 | 0.871 | 0.875 | 0.878 | 0.88  | 0.882 |       |       |  |
| Dorset                       | 0.704 | 0.71  | 0.715 | 0.721 | 0.726 | 0.731 | 0.737 | 0.742 | 0.747 | 0.752 | 0.754 | 0.757 | 0.762 | 0.768 | 0.775 | 0.781 | 0.788 | 0.794 | 0.801 | 0.807 | 0.811 | 0.814 | 0.814 | 0.813 | 0.815 | 0.816 | 0.815 | 0.814 | 0.814 | 0.814 | 0.816 | 0.821 | 0.827 | 0.833 | 0.837 | 0.839 | 0.841 | 0.842 |       |  |
| Wiltshire                    | 0.713 | 0.719 | 0.725 | 0.731 | 0.736 | 0.741 | 0.746 | 0.75  | 0.756 | 0.761 | 0.766 | 0.77  | 0.775 | 0.781 | 0.787 | 0.793 | 0.798 | 0.804 | 0.81  | 0.815 | 0.821 | 0.825 | 0.826 | 0.827 | 0.829 | 0.829 | 0.828 | 0.826 | 0.825 | 0.826 | 0.826 | 0.826 | 0.826 | 0.826 | 0.826 | 0.826 | 0.826 | 0.826 |       |  |
| North Somerset               | 0.695 | 0.701 | 0.708 | 0.714 | 0.721 | 0.727 | 0.734 | 0.74  | 0.746 | 0.751 | 0.753 | 0.756 | 0.761 | 0.766 | 0.771 | 0.776 | 0.781 | 0.787 | 0.793 | 0.799 | 0.805 | 0.809 | 0.811 | 0.813 | 0.817 | 0.821 | 0.823 | 0.825 | 0.827 | 0.826 | 0.827 | 0.829 | 0.833 | 0.838 | 0.841 | 0.843 | 0.844 |       |       |  |
| Devon                        | 0.701 | 0.707 | 0.712 | 0.717 | 0.721 | 0.726 | 0.731 | 0.736 | 0.742 | 0.748 | 0.753 | 0.757 | 0.762 | 0.767 | 0.772 | 0.777 | 0.782 | 0.788 | 0.794 | 0.802 | 0.809 | 0.815 | 0.818 | 0.821 | 0.825 | 0.829 | 0.831 | 0.833 | 0.834 | 0.835 | 0.836 | 0.836 | 0.837 | 0.84  | 0.845 | 0.849 | 0.851 | 0.853 |       |  |
| Poole                        | 0.708 | 0.714 | 0.719 | 0.724 | 0.729 | 0.735 | 0.741 | 0.748 | 0.755 | 0.761 | 0.766 | 0.771 | 0.776 | 0.782 | 0.789 | 0.796 | 0.802 | 0.808 | 0.814 | 0.82  | 0.826 | 0.83  | 0.83  | 0.83  | 0.832 | 0.834 | 0.835 | 0.835 | 0.836 | 0.836 | 0.836 | 0.836 | 0.836 | 0.836 | 0.836 | 0.836 | 0.836 | 0.836 | 0.836 |  |
| Bath and North East Somerset | 0.722 | 0.727 | 0.732 | 0.737 | 0.74  | 0.745 | 0.75  | 0.756 | 0.762 | 0.768 | 0.772 | 0.777 | 0.782 | 0.787 | 0.793 | 0.798 | 0.803 | 0.808 | 0.816 | 0.824 | 0.83  | 0.837 | 0.843 | 0.849 | 0.855 | 0.86  | 0.863 | 0.867 | 0.87  | 0.871 | 0.871 | 0.872 | 0.874 | 0.878 | 0.882 | 0.884 | 0.886 |       |       |  |
| Gloucestershire              | 0.716 | 0.722 | 0.728 | 0.733 | 0.738 | 0.744 | 0.749 | 0.754 | 0.76  | 0.765 | 0.77  | 0.775 | 0.779 | 0.785 | 0.79  | 0.796 | 0.801 | 0.806 | 0.812 | 0.819 | 0.826 | 0.832 | 0.835 | 0.838 | 0.842 | 0.844 | 0.844 | 0.844 | 0.844 | 0.845 | 0.846 | 0.849 | 0.851 | 0.855 | 0.859 | 0.861 | 0.862 | 0.863 |       |  |
| Somerset                     | 0.701 | 0.708 | 0.714 | 0.719 | 0.725 | 0.73  | 0.734 | 0.738 | 0.743 | 0.748 | 0.752 | 0.756 | 0.762 | 0.767 | 0.774 | 0.78  | 0.786 | 0.791 | 0.795 | 0.801 | 0.807 | 0.811 | 0.812 | 0.813 | 0.816 | 0.818 | 0.819 | 0.82  | 0.821 | 0.823 | 0.827 | 0.83  | 0.834 | 0.835 | 0.836 | 0.835 | 0.835 | 0.836 |       |  |
| Swindon                      | 0.736 | 0.742 | 0.748 | 0.753 | 0.757 | 0.761 | 0.766 | 0.77  | 0.777 | 0.784 | 0.79  | 0.796 | 0.801 | 0.806 | 0.81  | 0.815 | 0.819 | 0.824 | 0.831 | 0.838 | 0.844 | 0.849 | 0.851 | 0.851 | 0.851 | 0.852 | 0.851 | 0.853 | 0.855 | 0.856 | 0.858 | 0.858 | 0.859 | 0.861 | 0.865 | 0.866 | 0.866 | 0.867 |       |  |
| Torbay                       | 0.684 | 0.69  | 0.696 | 0.701 | 0.706 | 0.711 | 0.715 | 0.721 | 0.728 | 0.734 | 0.738 | 0.743 | 0.749 | 0.755 | 0.761 | 0.767 | 0.772 | 0.777 | 0.782 | 0.787 | 0.793 | 0.799 | 0.805 | 0.809 | 0.811 | 0.813 | 0.817 | 0.821 | 0.823 | 0.825 | 0.827 | 0.826 | 0.827 | 0.829 | 0.833 | 0.838 | 0.841 | 0.843 | 0.844 |  |
| Bristol, City of             | 0.738 | 0.744 | 0.749 | 0.753 | 0.756 | 0.759 | 0.763 | 0.766 | 0.772 | 0.779 | 0.787 | 0.796 | 0.804 | 0.811 | 0.817 | 0.822 | 0.827 | 0.832 | 0.839 | 0.847 | 0.854 | 0.859 | 0.863 | 0.865 | 0.869 | 0.872 | 0.875 | 0.878 | 0.881 | 0.882 | 0.881 | 0.88  | 0.882 | 0.887 | 0.891 | 0.895 | 0.898 |       |       |  |
| Bournemouth                  | 0.705 | 0.71  | 0.715 | 0.72  | 0.726 | 0.732 | 0.737 | 0.742 | 0.747 | 0.752 | 0.759 | 0.767 | 0.775 | 0.78  | 0.786 | 0.791 | 0.797 | 0.802 | 0.808 | 0.814 | 0.82  | 0.826 | 0.831 | 0.837 | 0.841 | 0.847 | 0.846 | 0.846 | 0.847 | 0.848 | 0.848 | 0.848 | 0.848 | 0.848 | 0.848 | 0.848 | 0.848 | 0.848 |       |  |
| Cornwall                     | 0.685 | 0.691 | 0.697 | 0.702 | 0.708 | 0.713 | 0.718 | 0.723 | 0.729 | 0.735 | 0.739 | 0.743 | 0.748 | 0.754 | 0.76  | 0.766 | 0.771 | 0.776 | 0.782 | 0.789 | 0.796 | 0.801 | 0.805 | 0.808 | 0.812 | 0.815 | 0.818 | 0.819 | 0.821 | 0.822 | 0.823 | 0.826 | 0.83  | 0.832 | 0.833 | 0.835 | 0.835 |       |       |  |
| Plymouth                     | 0.699 | 0.705 | 0.711 | 0.718 | 0.723 | 0.729 | 0.736 | 0.741 | 0.747 | 0.752 | 0.757 | 0.762 | 0.769 | 0.776 | 0.783 | 0.789 | 0.793 | 0.798 | 0.804 | 0.81  | 0.815 | 0.819 | 0.822 | 0.823 | 0.827 | 0.83  | 0.833 | 0.836 | 0.839 | 0.84  | 0.84  | 0.841 | 0.843 | 0.847 | 0.85  | 0.851 | 0.853 | 0.854 |       |  |
| North East England           | 0.681 | 0.687 | 0.692 | 0.698 | 0.702 | 0.708 | 0.714 | 0.72  | 0.727 | 0.732 | 0.737 | 0.743 | 0.749 | 0.755 | 0.762 | 0.768 | 0.773 | 0.779 | 0.785 | 0.792 | 0.798 | 0.804 | 0.81  | 0.815 | 0.819 | 0.822 | 0.824 | 0.826 | 0.828 | 0.83  | 0.834 | 0.837 | 0.841 | 0.843 | 0.845 | 0.847 | 0.848 | 0.848 |       |  |
| North West England           | 0.693 | 0.699 | 0.704 | 0.709 | 0.714 | 0.719 | 0.724 | 0.729 | 0.735 | 0.741 | 0.746 | 0.752 | 0.759 | 0.766 | 0.773 | 0.778 | 0.783 | 0.788 | 0.794 | 0.801 | 0.807 | 0.813 | 0.816 | 0.818 | 0.821 | 0.823 | 0.825 | 0.826 | 0.828 | 0.83  | 0.833 | 0.836 | 0.84  | 0.845 | 0.848 | 0.85  | 0.851 |       |       |  |
| Yorkshire and the Humber     | 0.69  | 0.695 | 0.701 | 0.706 | 0.711 | 0.716 | 0.721 | 0.726 | 0.733 | 0.738 | 0.743 | 0.749 | 0.755 | 0.761 | 0.767 | 0.773 | 0.777 | 0.783 | 0.789 | 0.795 | 0.802 | 0.808 | 0.811 | 0.813 | 0.816 |       |       |       |       |       |       |       |       |       |       |       |       |       |       |  |

Appendix Table 11: Socio-Demographic Index values for all estimated GBD 2016 locations, 1980–2016

| Location       | 1980  | 1981  | 1982  | 1983  | 1984  | 1985  | 1986  | 1987  | 1988  | 1989  | 1990  | 1991  | 1992  | 1993  | 1994  | 1995  | 1996  | 1997  | 1998  | 1999  | 2000  | 2001  | 2002  | 2003  | 2004  | 2005  | 2006  | 2007  | 2008  | 2009  | 2010  | 2011  | 2012  | 2013  | 2014  | 2015  | 2016  |       |       |
|----------------|-------|-------|-------|-------|-------|-------|-------|-------|-------|-------|-------|-------|-------|-------|-------|-------|-------|-------|-------|-------|-------|-------|-------|-------|-------|-------|-------|-------|-------|-------|-------|-------|-------|-------|-------|-------|-------|-------|-------|
| Idaho          | 0.809 | 0.813 | 0.816 | 0.822 | 0.825 | 0.829 | 0.833 | 0.834 | 0.834 | 0.832 | 0.833 | 0.835 | 0.837 | 0.84  | 0.842 | 0.845 | 0.846 | 0.847 | 0.848 | 0.849 | 0.851 | 0.854 | 0.854 | 0.854 | 0.855 | 0.854 | 0.853 | 0.854 | 0.859 | 0.864 | 0.867 | 0.869 | 0.87  | 0.871 | 0.872 | 0.872 | 0.872 | 0.872 |       |
| Illinois       | 0.843 | 0.846 | 0.849 | 0.852 | 0.854 | 0.856 | 0.857 | 0.858 | 0.856 | 0.855 | 0.856 | 0.858 | 0.86  | 0.863 | 0.866 | 0.868 | 0.871 | 0.872 | 0.874 | 0.875 | 0.878 | 0.881 | 0.883 | 0.884 | 0.886 | 0.888 | 0.888 | 0.891 | 0.895 | 0.899 | 0.902 | 0.903 | 0.905 | 0.906 | 0.907 | 0.908 | 0.908 | 0.908 |       |
| Indiana        | 0.833 | 0.837 | 0.84  | 0.843 | 0.844 | 0.846 | 0.848 | 0.848 | 0.848 | 0.847 | 0.848 | 0.85  | 0.853 | 0.855 | 0.858 | 0.859 | 0.86  | 0.86  | 0.86  | 0.861 | 0.863 | 0.866 | 0.867 | 0.869 | 0.869 | 0.868 | 0.869 | 0.872 | 0.875 | 0.878 | 0.879 | 0.88  | 0.881 | 0.882 | 0.883 | 0.883 | 0.883 |       |       |
| Iowa           | 0.834 | 0.838 | 0.842 | 0.845 | 0.848 | 0.85  | 0.853 | 0.854 | 0.854 | 0.853 | 0.854 | 0.856 | 0.858 | 0.86  | 0.862 | 0.864 | 0.865 | 0.866 | 0.867 | 0.868 | 0.87  | 0.873 | 0.874 | 0.875 | 0.876 | 0.876 | 0.874 | 0.876 | 0.88  | 0.884 | 0.887 | 0.888 | 0.889 | 0.891 | 0.891 | 0.892 | 0.891 | 0.892 | 0.893 |
| Kansas         | 0.835 | 0.839 | 0.842 | 0.846 | 0.848 | 0.851 | 0.854 | 0.855 | 0.856 | 0.855 | 0.857 | 0.859 | 0.861 | 0.862 | 0.864 | 0.865 | 0.866 | 0.866 | 0.866 | 0.866 | 0.866 | 0.867 | 0.873 | 0.874 | 0.875 | 0.875 | 0.874 | 0.875 | 0.879 | 0.883 | 0.886 | 0.888 | 0.889 | 0.892 | 0.893 | 0.895 | 0.895 | 0.895 |       |
| Kentucky       | 0.805 | 0.81  | 0.814 | 0.818 | 0.821 | 0.824 | 0.827 | 0.828 | 0.828 | 0.829 | 0.83  | 0.833 | 0.836 | 0.839 | 0.841 | 0.843 | 0.845 | 0.846 | 0.847 | 0.849 | 0.851 | 0.855 | 0.856 | 0.857 | 0.858 | 0.858 | 0.857 | 0.859 | 0.862 | 0.865 | 0.868 | 0.869 | 0.87  | 0.871 | 0.872 | 0.873 | 0.874 | 0.874 | 0.874 |
| Louisiana      | 0.796 | 0.801 | 0.806 | 0.811 | 0.814 | 0.817 | 0.82  | 0.822 | 0.822 | 0.822 | 0.824 | 0.827 | 0.83  | 0.833 | 0.837 | 0.84  | 0.842 | 0.844 | 0.846 | 0.847 | 0.85  | 0.854 | 0.856 | 0.857 | 0.86  | 0.86  | 0.861 | 0.864 | 0.869 | 0.873 | 0.876 | 0.878 | 0.88  | 0.882 | 0.883 | 0.885 | 0.885 | 0.885 |       |
| Maine          | 0.832 | 0.834 | 0.836 | 0.839 | 0.841 | 0.844 | 0.848 | 0.85  | 0.853 | 0.855 | 0.858 | 0.862 | 0.866 | 0.869 | 0.872 | 0.874 | 0.876 | 0.877 | 0.878 | 0.88  | 0.882 | 0.885 | 0.886 | 0.887 | 0.889 | 0.89  | 0.891 | 0.893 | 0.896 | 0.899 | 0.901 | 0.902 | 0.902 | 0.903 | 0.904 | 0.905 | 0.906 | 0.906 |       |
| Maryland       | 0.865 | 0.867 | 0.868 | 0.87  | 0.871 | 0.872 | 0.875 | 0.875 | 0.875 | 0.875 | 0.877 | 0.88  | 0.883 | 0.886 | 0.889 | 0.891 | 0.892 | 0.892 | 0.892 | 0.893 | 0.895 | 0.897 | 0.899 | 0.901 | 0.902 | 0.901 | 0.902 | 0.901 | 0.903 | 0.907 | 0.912 | 0.915 | 0.917 | 0.919 | 0.92  | 0.92  | 0.921 | 0.92  |       |
| Massachusetts  | 0.865 | 0.868 | 0.871 | 0.874 | 0.877 | 0.88  | 0.882 | 0.884 | 0.886 | 0.886 | 0.889 | 0.892 | 0.895 | 0.897 | 0.9   | 0.902 | 0.904 | 0.905 | 0.906 | 0.907 | 0.91  | 0.913 | 0.915 | 0.916 | 0.918 | 0.919 | 0.919 | 0.921 | 0.923 | 0.926 | 0.928 | 0.929 | 0.931 | 0.932 | 0.933 | 0.935 | 0.935 | 0.935 |       |
| Michigan       | 0.845 | 0.847 | 0.849 | 0.852 | 0.853 | 0.855 | 0.857 | 0.857 | 0.856 | 0.854 | 0.855 | 0.858 | 0.861 | 0.864 | 0.867 | 0.87  | 0.871 | 0.872 | 0.873 | 0.875 | 0.877 | 0.88  | 0.882 | 0.883 | 0.886 | 0.887 | 0.888 | 0.889 | 0.891 | 0.892 | 0.893 | 0.893 | 0.894 | 0.895 | 0.896 | 0.896 | 0.897 | 0.897 |       |
| Minnesota      | 0.839 | 0.844 | 0.848 | 0.852 | 0.856 | 0.859 | 0.863 | 0.866 | 0.867 | 0.868 | 0.87  | 0.873 | 0.875 | 0.877 | 0.879 | 0.88  | 0.882 | 0.882 | 0.883 | 0.884 | 0.886 | 0.889 | 0.89  | 0.891 | 0.891 | 0.891 | 0.89  | 0.892 | 0.896 | 0.9   | 0.903 | 0.904 | 0.905 | 0.906 | 0.907 | 0.909 | 0.909 | 0.909 |       |
| Mississippi    | 0.784 | 0.789 | 0.794 | 0.799 | 0.803 | 0.806 | 0.81  | 0.811 | 0.811 | 0.811 | 0.813 | 0.816 | 0.82  | 0.824 | 0.828 | 0.831 | 0.833 | 0.835 | 0.836 | 0.838 | 0.841 | 0.845 | 0.847 | 0.848 | 0.848 | 0.847 | 0.846 | 0.848 | 0.853 | 0.859 | 0.864 | 0.867 | 0.869 | 0.871 | 0.872 | 0.873 | 0.874 | 0.874 | 0.874 |
| Missouri       | 0.826 | 0.83  | 0.833 | 0.837 | 0.839 | 0.842 | 0.845 | 0.846 | 0.846 | 0.846 | 0.847 | 0.85  | 0.853 | 0.856 | 0.859 | 0.86  | 0.862 | 0.863 | 0.864 | 0.865 | 0.868 | 0.871 | 0.872 | 0.873 | 0.875 | 0.875 | 0.874 | 0.876 | 0.879 | 0.883 | 0.886 | 0.887 | 0.888 | 0.889 | 0.891 | 0.892 | 0.893 | 0.893 |       |
| Montana        | 0.829 | 0.831 | 0.834 | 0.837 | 0.838 | 0.84  | 0.843 | 0.845 | 0.844 | 0.844 | 0.845 | 0.847 | 0.849 | 0.852 | 0.855 | 0.858 | 0.86  | 0.862 | 0.863 | 0.865 | 0.866 | 0.868 | 0.869 | 0.869 | 0.872 | 0.872 | 0.873 | 0.875 | 0.879 | 0.882 | 0.885 | 0.886 | 0.888 | 0.889 | 0.891 | 0.892 | 0.893 | 0.893 |       |
| Nebraska       | 0.832 | 0.835 | 0.838 | 0.842 | 0.845 | 0.848 | 0.852 | 0.853 | 0.854 | 0.853 | 0.855 | 0.858 | 0.86  | 0.862 | 0.863 | 0.865 | 0.866 | 0.867 | 0.867 | 0.868 | 0.87  | 0.871 | 0.873 | 0.873 | 0.873 | 0.873 | 0.873 | 0.875 | 0.879 | 0.881 | 0.884 | 0.886 | 0.888 | 0.888 | 0.889 | 0.89  | 0.89  | 0.89  |       |
| Nevada         | 0.855 | 0.857 | 0.858 | 0.86  | 0.86  | 0.86  | 0.86  | 0.857 | 0.854 | 0.85  | 0.85  | 0.853 | 0.855 | 0.857 | 0.858 | 0.859 | 0.861 | 0.862 | 0.862 | 0.863 | 0.865 | 0.868 | 0.868 | 0.868 | 0.869 | 0.867 | 0.865 | 0.868 | 0.875 | 0.882 | 0.887 | 0.889 | 0.889 | 0.889 | 0.888 | 0.887 | 0.886 | 0.886 |       |
| New Hampshire  | 0.852 | 0.856 | 0.859 | 0.862 | 0.864 | 0.866 | 0.869 | 0.871 | 0.873 | 0.876 | 0.879 | 0.882 | 0.885 | 0.887 | 0.889 | 0.891 | 0.893 | 0.894 | 0.896 | 0.897 | 0.9   | 0.903 | 0.904 | 0.905 | 0.908 | 0.91  | 0.911 | 0.914 | 0.916 | 0.919 | 0.921 | 0.922 | 0.924 | 0.926 | 0.928 | 0.93  | 0.931 | 0.931 |       |
| New Jersey     | 0.858 | 0.861 | 0.864 | 0.867 | 0.868 | 0.87  | 0.872 | 0.873 | 0.873 | 0.873 | 0.875 | 0.878 | 0.881 | 0.883 | 0.885 | 0.887 | 0.889 | 0.891 | 0.892 | 0.894 | 0.896 | 0.897 | 0.899 | 0.901 | 0.902 | 0.901 | 0.902 | 0.901 | 0.903 | 0.907 | 0.912 | 0.914 | 0.915 | 0.916 | 0.917 | 0.918 | 0.918 | 0.918 |       |
| New Mexico     | 0.809 | 0.812 | 0.814 | 0.818 | 0.819 | 0.822 | 0.825 | 0.826 | 0.826 | 0.824 | 0.825 | 0.826 | 0.829 | 0.832 | 0.835 | 0.838 | 0.841 | 0.843 | 0.844 | 0.845 | 0.847 | 0.85  | 0.852 | 0.852 | 0.854 | 0.855 | 0.855 | 0.858 | 0.862 | 0.867 | 0.871 | 0.873 | 0.875 | 0.877 | 0.879 | 0.88  | 0.881 | 0.881 |       |
| New York       | 0.854 | 0.856 | 0.858 | 0.861 | 0.862 | 0.864 | 0.866 | 0.866 | 0.866 | 0.866 | 0.868 | 0.871 | 0.874 | 0.877 | 0.879 | 0.882 | 0.885 | 0.887 | 0.888 | 0.89  | 0.892 | 0.895 | 0.896 | 0.897 | 0.899 | 0.899 | 0.901 | 0.904 | 0.907 | 0.91  | 0.912 | 0.915 | 0.916 | 0.918 | 0.919 | 0.92  | 0.92  | 0.92  |       |
| North Carolina | 0.825 | 0.829 | 0.832 | 0.835 | 0.837 | 0.84  | 0.842 | 0.842 | 0.842 | 0.841 | 0.844 | 0.848 | 0.851 | 0.855 | 0.858 | 0.86  | 0.86  | 0.86  | 0.86  | 0.861 | 0.864 | 0.867 | 0.868 | 0.868 | 0.868 | 0.868 | 0.866 | 0.868 | 0.873 | 0.878 | 0.883 | 0.885 | 0.886 | 0.886 | 0.887 | 0.887 | 0.887 | 0.887 |       |
| North Dakota   | 0.816 | 0.818 | 0.822 | 0.827 | 0.83  | 0.835 | 0.839 | 0.842 | 0.842 | 0.843 | 0.846 | 0.848 | 0.85  | 0.852 | 0.854 | 0.857 | 0.86  | 0.863 | 0.866 | 0.869 | 0.871 | 0.874 | 0.875 | 0.874 | 0.874 | 0.874 | 0.872 | 0.874 | 0.879 | 0.883 | 0.887 | 0.888 | 0.891 | 0.892 | 0.893 | 0.895 | 0.896 | 0.896 |       |
| Ohio           | 0.838 | 0.841 | 0.844 | 0.847 | 0.848 | 0.85  | 0.853 | 0.853 | 0.853 | 0.852 | 0.854 | 0.856 | 0.858 | 0.86  | 0.863 | 0.865 | 0.866 | 0.866 | 0.867 | 0.868 | 0.87  | 0.874 | 0.875 | 0.876 | 0.878 | 0.879 | 0.88  | 0.883 | 0.885 | 0.887 | 0.888 | 0.889 | 0.89  | 0.891 | 0.892 | 0.893 | 0.893 |       |       |
| Oklahoma       | 0.82  | 0.824 | 0.828 | 0.833 | 0.836 | 0.84  | 0.843 | 0.844 | 0.843 | 0.842 | 0.843 | 0.844 | 0.846 | 0.847 | 0.848 | 0.849 | 0.849 | 0.849 | 0.85  | 0.85  | 0.853 | 0.856 | 0.857 | 0.858 | 0.86  | 0.861 | 0.861 | 0.862 | 0.866 | 0.869 | 0.872 | 0.874 | 0.877 | 0.879 | 0.88  | 0.882 | 0.883 | 0.883 |       |
| Oregon         | 0.85  | 0.852 | 0.854 | 0.857 | 0.857 | 0.858 | 0.859 | 0.858 | 0.857 | 0.856 | 0.857 | 0.86  | 0.863 | 0.866 | 0.868 | 0.869 | 0.87  | 0.871 | 0.873 | 0.875 | 0.878 | 0.883 | 0.885 | 0.886 | 0.887 | 0.887 | 0.886 | 0.887 | 0.89  | 0.894 | 0.897 | 0.898 | 0.899 | 0.9   | 0.901 | 0.903 | 0.903 | 0.903 |       |
| Pennsylvania   | 0.842 | 0.845 | 0.847 | 0.85  | 0.851 | 0.853 | 0.855 | 0.856 | 0.856 | 0.856 | 0.858 | 0.861 | 0.864 | 0.867 | 0.87  | 0.873 | 0.875 | 0.877 | 0.878 | 0.879 | 0.881 | 0.884 | 0.885 | 0.885 | 0.887 | 0.887 | 0.887 | 0.888 | 0.892 | 0.896 | 0.899 | 0.9   | 0.902 | 0.904 | 0.905 | 0.907 | 0.908 | 0.908 |       |
| Rhode Island   | 0.847 | 0.851 | 0.853 | 0.857 | 0.859 | 0.861 | 0.863 | 0.864 | 0.865 | 0.865 | 0.867 | 0.87  | 0.873 | 0.877 | 0.88  | 0.883 | 0.885 | 0.886 | 0.887 | 0.889 | 0.89  | 0.893 | 0.894 | 0.895 | 0.898 | 0.9   | 0.9   | 0.902 | 0.906 | 0.909 | 0.912 | 0.913 | 0.915 | 0.916 | 0.918 | 0.92  | 0.921 | 0.921 |       |
| South Carolina | 0.814 | 0.818 | 0.821 | 0.825 | 0.828 | 0.831 | 0.833 | 0.833 | 0.833 | 0.832 | 0.831 | 0.834 | 0.839 | 0.844 | 0.849 | 0.853 | 0.856 | 0.857 | 0.857 | 0.858 | 0.86  | 0.864 | 0.866 | 0.866 | 0.866 | 0.866 | 0.866 | 0.862 | 0.863 | 0.868 | 0.874 | 0.879 | 0.883 | 0.884 | 0.884 | 0.885 | 0.886 | 0.886 |       |
| South Dakota   | 0.806 | 0.81  | 0.814 | 0.818 | 0.822 | 0.825 | 0.83  | 0.832 | 0.832 | 0.832 | 0.834 | 0.836 | 0.839 | 0.842 | 0.846 | 0.849 | 0.852 | 0.853 | 0.855 | 0.857 | 0.859 | 0.861 | 0.861 | 0.862 | 0.863 | 0.862 | 0.861 | 0.863 | 0.868 | 0.872 | 0.876 | 0.877 | 0.878 | 0.879 | 0.88  | 0.881 | 0.882 | 0.882 |       |
| Tennessee      | 0.818 | 0.822 | 0.825 | 0.829 | 0.831 | 0.833 | 0.836 | 0.836 | 0.836 | 0.835 | 0.837 | 0.841 | 0.844 | 0.848 | 0.851 | 0.853 | 0.855 | 0.856 | 0.857 | 0.858 | 0.861 | 0.864 | 0.866 | 0.866 | 0.866 | 0.866 | 0.865 |       |       |       |       |       |       |       |       |       |       |       |       |

Appendix Table 11: Socio-Demographic Index values for all estimated GBD 2016 locations, 1980–2016

| Location              | 1980  | 1981  | 1982  | 1983  | 1984  | 1985  | 1986  | 1987  | 1988  | 1989  | 1990  | 1991  | 1992  | 1993  | 1994  | 1995  | 1996  | 1997  | 1998  | 1999  | 2000  | 2001  | 2002  | 2003  | 2004  | 2005  | 2006  | 2007  | 2008  | 2009  | 2010  | 2011  | 2012  | 2013  | 2014  | 2015  | 2016  |       |       |
|-----------------------|-------|-------|-------|-------|-------|-------|-------|-------|-------|-------|-------|-------|-------|-------|-------|-------|-------|-------|-------|-------|-------|-------|-------|-------|-------|-------|-------|-------|-------|-------|-------|-------|-------|-------|-------|-------|-------|-------|-------|
| Puerto Rico           | 0.699 | 0.71  | 0.719 | 0.727 | 0.733 | 0.739 | 0.743 | 0.748 | 0.753 | 0.76  | 0.767 | 0.774 | 0.781 | 0.788 | 0.793 | 0.799 | 0.805 | 0.81  | 0.817 | 0.822 | 0.828 | 0.834 | 0.84  | 0.845 | 0.85  | 0.854 | 0.858 | 0.86  | 0.863 | 0.864 | 0.866 | 0.867 | 0.868 | 0.87  | 0.871 | 0.873 | 0.875 |       |       |
| Virgin Islands, U.S.  | 0.723 | 0.732 | 0.738 | 0.743 | 0.749 | 0.755 | 0.76  | 0.764 | 0.767 | 0.771 | 0.777 | 0.782 | 0.789 | 0.796 | 0.802 | 0.808 | 0.814 | 0.82  | 0.825 | 0.829 | 0.833 | 0.836 | 0.839 | 0.842 | 0.845 | 0.85  | 0.855 | 0.861 | 0.864 | 0.868 | 0.871 | 0.874 | 0.875 | 0.876 | 0.877 | 0.878 | 0.877 | 0.877 |       |
| Andean Latin America  | 0.45  | 0.457 | 0.465 | 0.473 | 0.481 | 0.488 | 0.496 | 0.504 | 0.511 | 0.518 | 0.524 | 0.53  | 0.536 | 0.541 | 0.548 | 0.555 | 0.561 | 0.568 | 0.575 | 0.582 | 0.588 | 0.594 | 0.6   | 0.605 | 0.61  | 0.615 | 0.62  | 0.625 | 0.63  | 0.635 | 0.64  | 0.644 | 0.649 | 0.653 | 0.657 | 0.662 | 0.666 | 0.666 |       |
| Bolivia               | 0.354 | 0.361 | 0.368 | 0.376 | 0.383 | 0.39  | 0.397 | 0.405 | 0.412 | 0.418 | 0.425 | 0.432 | 0.439 | 0.446 | 0.453 | 0.461 | 0.469 | 0.477 | 0.485 | 0.494 | 0.502 | 0.51  | 0.518 | 0.525 | 0.531 | 0.539 | 0.546 | 0.553 | 0.56  | 0.567 | 0.573 | 0.58  | 0.586 | 0.593 | 0.599 | 0.605 | 0.61  | 0.61  |       |
| Ecuador               | 0.45  | 0.458 | 0.467 | 0.475 | 0.484 | 0.493 | 0.501 | 0.509 | 0.516 | 0.523 | 0.53  | 0.537 | 0.543 | 0.55  | 0.556 | 0.563 | 0.569 | 0.576 | 0.583 | 0.588 | 0.593 | 0.598 | 0.603 | 0.608 | 0.613 | 0.619 | 0.624 | 0.629 | 0.635 | 0.64  | 0.645 | 0.65  | 0.655 | 0.66  | 0.665 | 0.67  | 0.674 | 0.674 |       |
| Peru                  | 0.478 | 0.485 | 0.493 | 0.5   | 0.507 | 0.514 | 0.521 | 0.529 | 0.537 | 0.543 | 0.548 | 0.553 | 0.558 | 0.563 | 0.569 | 0.576 | 0.582 | 0.589 | 0.593 | 0.603 | 0.61  | 0.615 | 0.621 | 0.626 | 0.63  | 0.634 | 0.639 | 0.644 | 0.648 | 0.652 | 0.656 | 0.66  | 0.663 | 0.666 | 0.67  | 0.674 | 0.678 | 0.678 |       |
| Central Latin America | 0.466 | 0.476 | 0.485 | 0.493 | 0.502 | 0.51  | 0.518 | 0.525 | 0.531 | 0.537 | 0.544 | 0.551 | 0.56  | 0.568 | 0.575 | 0.581 | 0.588 | 0.595 | 0.602 | 0.609 | 0.615 | 0.622 | 0.627 | 0.633 | 0.639 | 0.645 | 0.652 | 0.659 | 0.665 | 0.671 | 0.676 | 0.682 | 0.689 | 0.695 | 0.701 | 0.707 | 0.711 | 0.711 |       |
| Colombia              | 0.485 | 0.493 | 0.5   | 0.506 | 0.513 | 0.519 | 0.526 | 0.532 | 0.538 | 0.544 | 0.55  | 0.556 | 0.562 | 0.568 | 0.574 | 0.581 | 0.588 | 0.595 | 0.601 | 0.606 | 0.611 | 0.616 | 0.62  | 0.624 | 0.629 | 0.634 | 0.639 | 0.645 | 0.652 | 0.658 | 0.664 | 0.672 | 0.679 | 0.686 | 0.694 | 0.701 | 0.707 | 0.707 |       |
| Costa Rica            | 0.527 | 0.532 | 0.535 | 0.537 | 0.539 | 0.541 | 0.546 | 0.552 | 0.557 | 0.563 | 0.57  | 0.577 | 0.584 | 0.591 | 0.598 | 0.603 | 0.608 | 0.614 | 0.62  | 0.627 | 0.634 | 0.64  | 0.646 | 0.651 | 0.657 | 0.662 | 0.668 | 0.674 | 0.679 | 0.685 | 0.691 | 0.697 | 0.704 | 0.71  | 0.716 | 0.722 | 0.726 | 0.726 |       |
| El Salvador           | 0.383 | 0.392 | 0.401 | 0.408 | 0.414 | 0.419 | 0.424 | 0.429 | 0.434 | 0.439 | 0.444 | 0.451 | 0.458 | 0.465 | 0.472 | 0.48  | 0.488 | 0.496 | 0.504 | 0.513 | 0.521 | 0.529 | 0.537 | 0.545 | 0.552 | 0.56  | 0.568 | 0.576 | 0.584 | 0.592 | 0.6   | 0.609 | 0.617 | 0.625 | 0.632 | 0.639 | 0.645 | 0.645 |       |
| Guatemala             | 0.325 | 0.33  | 0.335 | 0.338 | 0.342 | 0.345 | 0.348 | 0.351 | 0.355 | 0.36  | 0.365 | 0.37  | 0.376 | 0.383 | 0.389 | 0.396 | 0.404 | 0.412 | 0.42  | 0.429 | 0.438 | 0.446 | 0.455 | 0.463 | 0.472 | 0.48  | 0.489 | 0.498 | 0.506 | 0.514 | 0.522 | 0.53  | 0.537 | 0.543 | 0.55  | 0.556 | 0.561 | 0.561 |       |
| Honduras              | 0.295 | 0.304 | 0.313 | 0.321 | 0.329 | 0.337 | 0.345 | 0.353 | 0.362 | 0.37  | 0.381 | 0.39  | 0.4   | 0.409 | 0.418 | 0.427 | 0.435 | 0.443 | 0.451 | 0.459 | 0.466 | 0.474 | 0.481 | 0.488 | 0.495 | 0.502 | 0.508 | 0.515 | 0.522 | 0.527 | 0.533 | 0.539 | 0.545 | 0.551 | 0.556 | 0.562 | 0.567 | 0.567 |       |
| Mexico                | 0.458 | 0.47  | 0.481 | 0.491 | 0.501 | 0.511 | 0.521 | 0.53  | 0.538 | 0.547 | 0.555 | 0.564 | 0.573 | 0.582 | 0.591 | 0.598 | 0.606 | 0.614 | 0.622 | 0.629 | 0.637 | 0.644 | 0.651 | 0.657 | 0.664 | 0.671 | 0.678 | 0.684 | 0.691 | 0.695 | 0.701 | 0.706 | 0.712 | 0.718 | 0.723 | 0.729 | 0.734 | 0.734 |       |
| Nicaragua             | 0.409 | 0.412 | 0.415 | 0.418 | 0.421 | 0.424 | 0.427 | 0.43  | 0.431 | 0.433 | 0.434 | 0.436 | 0.438 | 0.44  | 0.443 | 0.447 | 0.453 | 0.459 | 0.466 | 0.473 | 0.481 | 0.488 | 0.496 | 0.502 | 0.509 | 0.516 | 0.523 | 0.53  | 0.537 | 0.543 | 0.549 | 0.555 | 0.562 | 0.569 | 0.576 | 0.583 | 0.588 | 0.588 |       |
| Panama                | 0.542 | 0.552 | 0.56  | 0.568 | 0.574 | 0.581 | 0.588 | 0.594 | 0.597 | 0.6   | 0.603 | 0.607 | 0.611 | 0.615 | 0.62  | 0.624 | 0.628 | 0.633 | 0.64  | 0.647 | 0.653 | 0.66  | 0.666 | 0.67  | 0.674 | 0.679 | 0.683 | 0.688 | 0.693 | 0.698 | 0.704 | 0.71  | 0.718 | 0.726 | 0.735 | 0.744 | 0.752 | 0.752 |       |
| Venezuela             | 0.533 | 0.54  | 0.547 | 0.557 | 0.568 | 0.577 | 0.583 | 0.588 | 0.594 | 0.592 | 0.59  | 0.602 | 0.619 | 0.628 | 0.629 | 0.632 | 0.637 | 0.642 | 0.647 | 0.65  | 0.654 | 0.657 | 0.66  | 0.662 | 0.664 | 0.667 | 0.673 | 0.681 | 0.688 | 0.696 | 0.702 | 0.708 | 0.714 | 0.721 | 0.728 | 0.734 | 0.738 | 0.742 | 0.742 |
| Aguascalientes        | 0.49  | 0.502 | 0.512 | 0.521 | 0.53  | 0.538 | 0.548 | 0.558 | 0.567 | 0.576 | 0.586 | 0.597 | 0.608 | 0.617 | 0.624 | 0.631 | 0.639 | 0.648 | 0.656 | 0.663 | 0.67  | 0.675 | 0.681 | 0.687 | 0.693 | 0.699 | 0.705 | 0.711 | 0.715 | 0.719 | 0.723 | 0.728 | 0.733 | 0.739 | 0.744 | 0.749 | 0.754 | 0.754 |       |
| Baja California       | 0.523 | 0.536 | 0.548 | 0.56  | 0.572 | 0.585 | 0.597 | 0.608 | 0.617 | 0.624 | 0.629 | 0.635 | 0.642 | 0.65  | 0.658 | 0.666 | 0.672 | 0.676 | 0.68  | 0.687 | 0.695 | 0.703 | 0.709 | 0.713 | 0.715 | 0.718 | 0.722 | 0.728 | 0.735 | 0.74  | 0.745 | 0.751 | 0.758 | 0.764 | 0.769 | 0.773 | 0.776 | 0.776 |       |
| Baja California Sur   | 0.535 | 0.547 | 0.559 | 0.571 | 0.584 | 0.596 | 0.605 | 0.615 | 0.627 | 0.635 | 0.644 | 0.654 | 0.663 | 0.669 | 0.674 | 0.679 | 0.686 | 0.691 | 0.692 | 0.689 | 0.693 | 0.694 | 0.698 | 0.701 | 0.707 | 0.712 | 0.711 | 0.707 | 0.706 | 0.71  | 0.718 | 0.729 | 0.738 | 0.744 | 0.749 | 0.753 | 0.757 | 0.757 |       |
| Campeche              | 0.437 | 0.449 | 0.459 | 0.468 | 0.477 | 0.485 | 0.494 | 0.503 | 0.511 | 0.52  | 0.53  | 0.541 | 0.551 | 0.56  | 0.567 | 0.574 | 0.582 | 0.593 | 0.603 | 0.614 | 0.625 | 0.635 | 0.643 | 0.651 | 0.658 | 0.665 | 0.671 | 0.677 | 0.682 | 0.685 | 0.688 | 0.693 | 0.7   | 0.707 | 0.713 | 0.72  | 0.726 | 0.726 |       |
| Coahuila              | 0.499 | 0.512 | 0.523 | 0.533 | 0.543 | 0.552 | 0.562 | 0.572 | 0.582 | 0.593 | 0.605 | 0.617 | 0.63  | 0.64  | 0.649 | 0.656 | 0.663 | 0.671 | 0.679 | 0.685 | 0.691 | 0.697 | 0.702 | 0.708 | 0.714 | 0.72  | 0.726 | 0.733 | 0.739 | 0.743 | 0.747 | 0.751 | 0.754 | 0.758 | 0.764 | 0.769 | 0.776 | 0.776 |       |
| Colima                | 0.472 | 0.485 | 0.496 | 0.506 | 0.517 | 0.528 | 0.54  | 0.553 | 0.565 | 0.579 | 0.591 | 0.604 | 0.616 | 0.625 | 0.632 | 0.638 | 0.645 | 0.652 | 0.659 | 0.666 | 0.672 | 0.678 | 0.683 | 0.689 | 0.695 | 0.7   | 0.706 | 0.712 | 0.716 | 0.719 | 0.723 | 0.727 | 0.732 | 0.737 | 0.742 | 0.748 | 0.753 | 0.753 |       |
| Chiapas               | 0.3   | 0.313 | 0.323 | 0.332 | 0.338 | 0.342 | 0.345 | 0.345 | 0.342 | 0.339 | 0.342 | 0.355 | 0.375 | 0.393 | 0.41  | 0.427 | 0.444 | 0.459 | 0.472 | 0.483 | 0.491 | 0.499 | 0.508 | 0.517 | 0.527 | 0.536 | 0.546 | 0.555 | 0.563 | 0.57  | 0.577 | 0.585 | 0.593 | 0.6   | 0.608 | 0.616 | 0.622 | 0.622 |       |
| Chihuahua             | 0.49  | 0.503 | 0.513 | 0.523 | 0.531 | 0.54  | 0.549 | 0.559 | 0.568 | 0.578 | 0.587 | 0.597 | 0.607 | 0.614 | 0.62  | 0.623 | 0.628 | 0.634 | 0.639 | 0.645 | 0.651 | 0.658 | 0.666 | 0.673 | 0.682 | 0.689 | 0.697 | 0.705 | 0.713 | 0.719 | 0.726 | 0.734 | 0.743 | 0.75  | 0.758 | 0.764 | 0.769 | 0.769 |       |
| Distrito Federal      | 0.592 | 0.605 | 0.615 | 0.624 | 0.631 | 0.635 | 0.638 | 0.642 | 0.649 | 0.66  | 0.671 | 0.68  | 0.686 | 0.692 | 0.702 | 0.713 | 0.723 | 0.729 | 0.733 | 0.738 | 0.743 | 0.749 | 0.755 | 0.761 | 0.766 | 0.771 | 0.776 | 0.779 | 0.782 | 0.783 | 0.785 | 0.79  | 0.796 | 0.802 | 0.808 | 0.814 | 0.819 | 0.819 |       |
| Durango               | 0.459 | 0.47  | 0.48  | 0.488 | 0.495 | 0.503 | 0.509 | 0.516 | 0.522 | 0.529 | 0.536 | 0.544 | 0.553 | 0.559 | 0.563 | 0.568 | 0.576 | 0.586 | 0.593 | 0.605 | 0.615 | 0.624 | 0.632 | 0.641 | 0.65  | 0.657 | 0.665 | 0.672 | 0.678 | 0.681 | 0.684 | 0.688 | 0.691 | 0.696 | 0.7   | 0.705 | 0.709 | 0.709 |       |
| Guajalajara           | 0.384 | 0.396 | 0.407 | 0.417 | 0.427 | 0.437 | 0.448 | 0.461 | 0.472 | 0.485 | 0.497 | 0.511 | 0.524 | 0.534 | 0.543 | 0.551 | 0.562 | 0.573 | 0.583 | 0.593 | 0.603 | 0.611 | 0.619 | 0.627 | 0.634 | 0.642 | 0.65  | 0.658 | 0.666 | 0.671 | 0.677 | 0.683 | 0.688 | 0.694 | 0.7   | 0.706 | 0.711 | 0.711 |       |
| Guerrero              | 0.355 | 0.367 | 0.378 | 0.387 | 0.395 | 0.404 | 0.413 | 0.423 | 0.431 | 0.437 | 0.441 | 0.444 | 0.445 | 0.442 | 0.438 | 0.439 | 0.445 | 0.454 | 0.464 | 0.473 | 0.483 | 0.494 | 0.505 | 0.517 | 0.529 | 0.54  | 0.551 | 0.562 | 0.57  | 0.577 | 0.585 | 0.595 | 0.606 | 0.617 | 0.626 | 0.634 | 0.639 | 0.639 |       |
| Hidalgo               | 0.383 | 0.395 | 0.406 | 0.416 | 0.426 | 0.437 | 0.449 | 0.46  | 0.47  | 0.48  | 0.49  | 0.501 | 0.515 | 0.521 | 0.527 | 0.533 | 0.541 | 0.55  | 0.56  | 0.569 | 0.577 | 0.587 | 0.594 | 0.602 | 0.609 | 0.616 | 0.624 | 0.633 | 0.64  | 0.646 | 0.651 | 0.656 | 0.662 | 0.668 | 0.674 | 0.68  | 0.685 | 0.685 |       |
| Jalisco               | 0.463 | 0.475 | 0.486 | 0.496 | 0.505 | 0.514 | 0.524 | 0.535 | 0.544 | 0.554 | 0.565 | 0.577 | 0.589 | 0.599 | 0.607 | 0.615 | 0.624 | 0.633 | 0.642 | 0.65  | 0.658 | 0.664 | 0.671 | 0.677 | 0.684 | 0.69  | 0.697 | 0.703 | 0.709 | 0.712 | 0.716 | 0.719 | 0.723 | 0.727 | 0.732 | 0.736 | 0.741 | 0.741 |       |
| México                | 0.447 | 0.463 | 0.481 | 0.502 | 0.528 | 0.554 | 0.571 | 0.582 | 0.592 | 0.595 | 0.597 | 0.598 | 0.6   | 0.616 | 0.637 | 0.646 | 0.651 | 0.655 | 0.66  | 0.666 | 0.673 | 0.679 | 0.684 | 0.688 | 0.692 | 0.697 | 0.701 |       |       |       |       |       |       |       |       |       |       |       |       |

Appendix Table 11: Socio-Demographic Index values for all estimated GBD 2016 locations, 1980–2016

| Location                     | 1980  | 1981  | 1982  | 1983  | 1984  | 1985  | 1986  | 1987  | 1988  | 1989  | 1990  | 1991  | 1992  | 1993  | 1994  | 1995  | 1996  | 1997  | 1998  | 1999  | 2000  | 2001  | 2002  | 2003  | 2004  | 2005  | 2006  | 2007  | 2008  | 2009  | 2010  | 2011  | 2012  | 2013  | 2014  | 2015  | 2016  |
|------------------------------|-------|-------|-------|-------|-------|-------|-------|-------|-------|-------|-------|-------|-------|-------|-------|-------|-------|-------|-------|-------|-------|-------|-------|-------|-------|-------|-------|-------|-------|-------|-------|-------|-------|-------|-------|-------|-------|
| Distrito Federal             | 0.597 | 0.607 | 0.617 | 0.625 | 0.634 | 0.643 | 0.652 | 0.659 | 0.666 | 0.673 | 0.68  | 0.686 | 0.692 | 0.698 | 0.704 | 0.71  | 0.717 | 0.723 | 0.729 | 0.735 | 0.741 | 0.747 | 0.753 | 0.758 | 0.764 | 0.769 | 0.775 | 0.781 | 0.787 | 0.793 | 0.8   | 0.806 | 0.812 | 0.818 | 0.824 | 0.829 | 0.832 |
| Espírito Santo               | 0.459 | 0.47  | 0.481 | 0.49  | 0.499 | 0.509 | 0.518 | 0.527 | 0.536 | 0.545 | 0.553 | 0.561 | 0.568 | 0.577 | 0.584 | 0.592 | 0.6   | 0.607 | 0.614 | 0.621 | 0.628 | 0.635 | 0.642 | 0.648 | 0.654 | 0.66  | 0.665 | 0.671 | 0.677 | 0.682 | 0.688 | 0.694 | 0.699 | 0.705 | 0.711 | 0.717 | 0.721 |
| Goias                        | 0.396 | 0.411 | 0.425 | 0.437 | 0.45  | 0.462 | 0.473 | 0.483 | 0.493 | 0.502 | 0.511 | 0.52  | 0.528 | 0.537 | 0.546 | 0.555 | 0.565 | 0.574 | 0.582 | 0.59  | 0.597 | 0.604 | 0.612 | 0.617 | 0.623 | 0.628 | 0.635 | 0.641 | 0.647 | 0.653 | 0.659 | 0.665 | 0.67  | 0.676 | 0.682 | 0.689 | 0.693 |
| Maranhão                     | 0.309 | 0.314 | 0.319 | 0.324 | 0.329 | 0.333 | 0.341 | 0.352 | 0.361 | 0.371 | 0.38  | 0.387 | 0.393 | 0.403 | 0.413 | 0.424 | 0.435 | 0.446 | 0.457 | 0.468 | 0.479 | 0.488 | 0.496 | 0.503 | 0.511 | 0.517 | 0.525 | 0.533 | 0.541 | 0.549 | 0.557 | 0.566 | 0.574 | 0.581 | 0.588 | 0.595 | 0.6   |
| Minas Gerais                 | 0.45  | 0.462 | 0.473 | 0.483 | 0.493 | 0.503 | 0.512 | 0.518 | 0.525 | 0.532 | 0.539 | 0.546 | 0.552 | 0.559 | 0.566 | 0.574 | 0.582 | 0.589 | 0.596 | 0.603 | 0.609 | 0.615 | 0.621 | 0.627 | 0.632 | 0.638 | 0.643 | 0.65  | 0.656 | 0.661 | 0.668 | 0.674 | 0.68  | 0.686 | 0.692 | 0.697 | 0.702 |
| Mato Grosso do Sul           | 0.401 | 0.418 | 0.432 | 0.445 | 0.457 | 0.471 | 0.481 | 0.489 | 0.498 | 0.506 | 0.514 | 0.522 | 0.53  | 0.539 | 0.548 | 0.558 | 0.567 | 0.576 | 0.584 | 0.591 | 0.598 | 0.604 | 0.61  | 0.615 | 0.62  | 0.626 | 0.632 | 0.638 | 0.644 | 0.649 | 0.654 | 0.659 | 0.664 | 0.669 | 0.675 | 0.681 | 0.686 |
| Mato Grosso                  | 0.419 | 0.433 | 0.445 | 0.456 | 0.467 | 0.48  | 0.49  | 0.498 | 0.507 | 0.516 | 0.524 | 0.532 | 0.54  | 0.549 | 0.559 | 0.569 | 0.578 | 0.587 | 0.595 | 0.602 | 0.609 | 0.615 | 0.621 | 0.626 | 0.631 | 0.636 | 0.642 | 0.647 | 0.653 | 0.658 | 0.664 | 0.67  | 0.675 | 0.68  | 0.687 | 0.693 | 0.699 |
| Pará                         | 0.364 | 0.375 | 0.385 | 0.393 | 0.402 | 0.411 | 0.42  | 0.428 | 0.436 | 0.444 | 0.451 | 0.458 | 0.465 | 0.473 | 0.483 | 0.493 | 0.503 | 0.511 | 0.519 | 0.526 | 0.532 | 0.537 | 0.541 | 0.545 | 0.549 | 0.554 | 0.56  | 0.566 | 0.574 | 0.581 | 0.589 | 0.597 | 0.605 | 0.612 | 0.619 | 0.625 | 0.63  |
| Paraíba                      | 0.325 | 0.337 | 0.347 | 0.356 | 0.365 | 0.372 | 0.384 | 0.399 | 0.412 | 0.424 | 0.436 | 0.444 | 0.451 | 0.459 | 0.467 | 0.476 | 0.486 | 0.495 | 0.504 | 0.512 | 0.519 | 0.527 | 0.533 | 0.54  | 0.546 | 0.553 | 0.559 | 0.567 | 0.574 | 0.581 | 0.589 | 0.596 | 0.603 | 0.61  | 0.616 | 0.622 | 0.627 |
| Paraná                       | 0.443 | 0.458 | 0.471 | 0.483 | 0.494 | 0.507 | 0.517 | 0.524 | 0.533 | 0.541 | 0.548 | 0.556 | 0.564 | 0.572 | 0.58  | 0.589 | 0.597 | 0.606 | 0.614 | 0.622 | 0.629 | 0.636 | 0.643 | 0.649 | 0.654 | 0.66  | 0.665 | 0.671 | 0.677 | 0.682 | 0.688 | 0.694 | 0.7   | 0.706 | 0.712 | 0.718 | 0.722 |
| Pernambuco                   | 0.364 | 0.377 | 0.387 | 0.396 | 0.405 | 0.414 | 0.425 | 0.437 | 0.448 | 0.458 | 0.468 | 0.477 | 0.485 | 0.492 | 0.5   | 0.508 | 0.516 | 0.523 | 0.53  | 0.536 | 0.543 | 0.549 | 0.555 | 0.561 | 0.567 | 0.573 | 0.579 | 0.585 | 0.592 | 0.598 | 0.605 | 0.611 | 0.617 | 0.623 | 0.63  | 0.636 | 0.64  |
| Piauí                        | 0.321 | 0.329 | 0.337 | 0.344 | 0.351 | 0.358 | 0.367 | 0.378 | 0.388 | 0.398 | 0.408 | 0.415 | 0.421 | 0.428 | 0.436 | 0.445 | 0.455 | 0.464 | 0.473 | 0.482 | 0.49  | 0.498 | 0.505 | 0.512 | 0.519 | 0.526 | 0.533 | 0.54  | 0.548 | 0.555 | 0.563 | 0.571 | 0.578 | 0.585 | 0.591 | 0.598 | 0.604 |
| Rio de Janeiro               | 0.531 | 0.545 | 0.557 | 0.567 | 0.577 | 0.587 | 0.595 | 0.602 | 0.608 | 0.615 | 0.62  | 0.626 | 0.631 | 0.637 | 0.642 | 0.648 | 0.653 | 0.659 | 0.665 | 0.67  | 0.676 | 0.682 | 0.688 | 0.692 | 0.696 | 0.701 | 0.705 | 0.71  | 0.714 | 0.718 | 0.723 | 0.727 | 0.732 | 0.736 | 0.74  | 0.745 | 0.749 |
| Rio Grande do Norte          | 0.357 | 0.369 | 0.38  | 0.39  | 0.4   | 0.409 | 0.42  | 0.431 | 0.442 | 0.452 | 0.461 | 0.469 | 0.477 | 0.485 | 0.494 | 0.504 | 0.515 | 0.524 | 0.531 | 0.539 | 0.546 | 0.554 | 0.562 | 0.568 | 0.575 | 0.582 | 0.589 | 0.596 | 0.603 | 0.61  | 0.618 | 0.625 | 0.632 | 0.639 | 0.645 | 0.651 | 0.656 |
| Roraima                      | 0.401 | 0.411 | 0.421 | 0.43  | 0.44  | 0.45  | 0.461 | 0.472 | 0.483 | 0.493 | 0.503 | 0.512 | 0.52  | 0.527 | 0.535 | 0.542 | 0.548 | 0.552 | 0.558 | 0.569 | 0.581 | 0.589 | 0.595 | 0.604 | 0.612 | 0.62  | 0.628 | 0.636 | 0.644 | 0.651 | 0.657 | 0.661 | 0.666 | 0.672 | 0.678 | 0.683 |       |
| Rio Grande do Sul            | 0.506 | 0.516 | 0.525 | 0.533 | 0.541 | 0.549 | 0.557 | 0.565 | 0.572 | 0.579 | 0.585 | 0.592 | 0.598 | 0.604 | 0.61  | 0.617 | 0.622 | 0.628 | 0.635 | 0.641 | 0.647 | 0.654 | 0.66  | 0.665 | 0.671 | 0.676 | 0.682 | 0.688 | 0.693 | 0.698 | 0.703 | 0.708 | 0.712 | 0.717 | 0.722 | 0.727 | 0.732 |
| Santa Catarina               | 0.477 | 0.489 | 0.499 | 0.508 | 0.517 | 0.526 | 0.536 | 0.544 | 0.553 | 0.561 | 0.569 | 0.577 | 0.584 | 0.592 | 0.6   | 0.609 | 0.617 | 0.624 | 0.632 | 0.639 | 0.647 | 0.654 | 0.66  | 0.665 | 0.671 | 0.676 | 0.681 | 0.687 | 0.693 | 0.698 | 0.704 | 0.711 | 0.716 | 0.722 | 0.729 | 0.735 | 0.74  |
| Sergipe                      | 0.336 | 0.35  | 0.361 | 0.372 | 0.382 | 0.391 | 0.403 | 0.417 | 0.43  | 0.443 | 0.453 | 0.463 | 0.472 | 0.481 | 0.49  | 0.501 | 0.511 | 0.52  | 0.529 | 0.537 | 0.546 | 0.554 | 0.562 | 0.569 | 0.576 | 0.582 | 0.589 | 0.596 | 0.604 | 0.611 | 0.619 | 0.627 | 0.634 | 0.641 | 0.648 | 0.654 | 0.659 |
| São Paulo                    | 0.53  | 0.542 | 0.552 | 0.561 | 0.571 | 0.581 | 0.589 | 0.596 | 0.602 | 0.609 | 0.615 | 0.621 | 0.628 | 0.634 | 0.64  | 0.647 | 0.653 | 0.659 | 0.666 | 0.672 | 0.679 | 0.686 | 0.692 | 0.697 | 0.702 | 0.706 | 0.711 | 0.716 | 0.721 | 0.726 | 0.73  | 0.736 | 0.74  | 0.745 | 0.75  | 0.756 | 0.76  |
| Tocantins                    | 0.38  | 0.389 | 0.398 | 0.406 | 0.415 | 0.424 | 0.434 | 0.443 | 0.452 | 0.461 | 0.469 | 0.477 | 0.486 | 0.494 | 0.502 | 0.511 | 0.521 | 0.53  | 0.539 | 0.547 | 0.556 | 0.563 | 0.571 | 0.578 | 0.584 | 0.591 | 0.597 | 0.604 | 0.612 | 0.619 | 0.626 | 0.634 | 0.642 | 0.649 | 0.656 | 0.663 | 0.668 |
| North Africa and Middle East | 0.382 | 0.392 | 0.401 | 0.41  | 0.418 | 0.427 | 0.436 | 0.446 | 0.455 | 0.465 | 0.475 | 0.485 | 0.495 | 0.505 | 0.513 | 0.522 | 0.531 | 0.539 | 0.548 | 0.556 | 0.564 | 0.571 | 0.578 | 0.586 | 0.593 | 0.601 | 0.608 | 0.615 | 0.622 | 0.628 | 0.634 | 0.64  | 0.647 | 0.654 | 0.661 | 0.669 | 0.674 |
| North Africa and Middle East | 0.382 | 0.392 | 0.401 | 0.41  | 0.418 | 0.427 | 0.436 | 0.446 | 0.455 | 0.465 | 0.475 | 0.485 | 0.495 | 0.505 | 0.513 | 0.522 | 0.531 | 0.539 | 0.548 | 0.556 | 0.564 | 0.571 | 0.578 | 0.586 | 0.593 | 0.601 | 0.608 | 0.615 | 0.622 | 0.628 | 0.634 | 0.64  | 0.647 | 0.654 | 0.661 | 0.669 | 0.674 |
| Algeria                      | 0.356 | 0.367 | 0.379 | 0.39  | 0.401 | 0.412 | 0.423 | 0.433 | 0.443 | 0.453 | 0.463 | 0.472 | 0.479 | 0.485 | 0.49  | 0.495 | 0.5   | 0.505 | 0.51  | 0.516 | 0.523 | 0.53  | 0.538 | 0.549 | 0.559 | 0.57  | 0.581 | 0.591 | 0.602 | 0.612 | 0.622 | 0.632 | 0.642 | 0.651 | 0.66  | 0.669 | 0.676 |
| Bahrain                      | 0.498 | 0.513 | 0.526 | 0.536 | 0.54  | 0.542 | 0.55  | 0.559 | 0.565 | 0.571 | 0.586 | 0.599 | 0.605 | 0.613 | 0.623 | 0.633 | 0.641 | 0.644 | 0.646 | 0.65  | 0.663 | 0.681 | 0.694 | 0.699 | 0.701 | 0.703 | 0.707 | 0.711 | 0.716 | 0.719 | 0.72  | 0.719 | 0.718 | 0.721 | 0.726 | 0.732 | 0.738 |
| Egypt                        | 0.347 | 0.358 | 0.369 | 0.38  | 0.391 | 0.402 | 0.413 | 0.425 | 0.435 | 0.446 | 0.458 | 0.469 | 0.48  | 0.49  | 0.499 | 0.509 | 0.518 | 0.527 | 0.535 | 0.543 | 0.551 | 0.558 | 0.566 | 0.573 | 0.579 | 0.585 | 0.591 | 0.596 | 0.601 | 0.607 | 0.612 | 0.617 | 0.623 | 0.629 | 0.637 | 0.645 | 0.653 |
| Iran                         | 0.379 | 0.387 | 0.395 | 0.404 | 0.412 | 0.422 | 0.434 | 0.449 | 0.466 | 0.487 | 0.51  | 0.536 | 0.562 | 0.585 | 0.607 | 0.625 | 0.642 | 0.656 | 0.667 | 0.676 | 0.683 | 0.689 | 0.695 | 0.701 | 0.707 | 0.713 | 0.719 | 0.725 | 0.731 | 0.736 | 0.742 | 0.748 | 0.752 | 0.757 | 0.762 | 0.766 | 0.769 |
| Iraq                         | 0.289 | 0.299 | 0.31  | 0.32  | 0.331 | 0.341 | 0.351 | 0.361 | 0.372 | 0.381 | 0.391 | 0.398 | 0.405 | 0.412 | 0.418 | 0.423 | 0.429 | 0.437 | 0.447 | 0.459 | 0.472 | 0.485 | 0.495 | 0.498 | 0.498 | 0.492 | 0.485 | 0.475 | 0.461 | 0.447 | 0.434 | 0.429 | 0.432 | 0.44  | 0.45  | 0.463 | 0.474 |
| Jordan                       | 0.264 | 0.294 | 0.322 | 0.346 | 0.369 | 0.389 | 0.409 | 0.428 | 0.448 | 0.468 | 0.483 | 0.497 | 0.511 | 0.524 | 0.538 | 0.548 | 0.558 | 0.568 | 0.577 | 0.586 | 0.595 | 0.603 | 0.61  | 0.615 | 0.621 | 0.626 | 0.632 | 0.637 | 0.643 | 0.649 | 0.656 | 0.663 | 0.669 | 0.676 | 0.683 | 0.69  | 0.694 |
| Kuwait                       | 0.46  | 0.476 | 0.494 | 0.515 | 0.54  | 0.566 | 0.59  | 0.611 | 0.628 | 0.642 | 0.652 | 0.657 | 0.66  | 0.659 | 0.653 | 0.649 | 0.655 | 0.671 | 0.689 | 0.702 | 0.711 | 0.717 | 0.721 | 0.726 | 0.732 | 0.738 | 0.747 | 0.758 | 0.77  | 0.781 | 0.791 | 0.8   | 0.808 | 0.816 | 0.823 | 0.829 | 0.832 |
| Lebanon                      | 0.51  | 0.525 | 0.536 | 0.547 | 0.561 | 0.575 | 0.588 | 0.602 | 0.613 | 0.621 | 0.627 | 0.636 | 0.645 | 0.653 | 0.661 | 0.669 | 0.678 | 0.687 | 0.697 | 0.706 | 0.715 | 0.723 | 0.73  | 0.738 | 0.744 | 0.751 | 0.757 | 0.763 | 0.77  | 0.777 | 0.785 | 0.792 | 0.797 | 0.801 | 0.804 | 0.807 | 0.81  |
| Libya                        | 0.565 | 0.57  | 0.575 | 0.579 | 0.583 | 0.588 | 0.591 | 0.595 | 0.598 | 0.601 | 0.605 | 0.611 | 0.617 | 0.623 | 0.63  | 0.636 | 0.643 | 0.651 | 0.659 | 0.667 | 0.675 | 0.684 | 0.692 | 0.702 | 0.712 | 0.723 | 0.734 | 0.746 | 0.757 | 0.768 | 0.781 | 0.785 | 0.793 | 0.8   | 0.804 | 0.807 | 0.806 |
| Morocco                      | 0.287 | 0.295 | 0.303 | 0.312 | 0.321 | 0.329 | 0.339 | 0.349 | 0.359 | 0.37  | 0.381 | 0.393 | 0.404 | 0.415 | 0.427 | 0.438 | 0.449 | 0.46  |       |       |       |       |       |       |       |       |       |       |       |       |       |       |       |       |       |       |       |

Appendix Table 11: Socio-Demographic Index values for all estimated GBD 2016 locations, 1980–2016

| Location          | 1980  | 1981  | 1982  | 1983  | 1984  | 1985  | 1986  | 1987  | 1988  | 1989  | 1990  | 1991  | 1992  | 1993  | 1994  | 1995  | 1996  | 1997  | 1998  | 1999  | 2000  | 2001  | 2002  | 2003  | 2004  | 2005  | 2006  | 2007  | 2008  | 2009  | 2010  | 2011  | 2012  | 2013  | 2014  | 2015  | 2016  |       |
|-------------------|-------|-------|-------|-------|-------|-------|-------|-------|-------|-------|-------|-------|-------|-------|-------|-------|-------|-------|-------|-------|-------|-------|-------|-------|-------|-------|-------|-------|-------|-------|-------|-------|-------|-------|-------|-------|-------|-------|
| South Asia        | 0.288 | 0.293 | 0.298 | 0.303 | 0.309 | 0.314 | 0.32  | 0.327 | 0.334 | 0.341 | 0.349 | 0.356 | 0.364 | 0.371 | 0.378 | 0.386 | 0.394 | 0.402 | 0.409 | 0.417 | 0.425 | 0.432 | 0.44  | 0.447 | 0.455 | 0.464 | 0.473 | 0.482 | 0.491 | 0.5   | 0.51  | 0.519 | 0.529 | 0.539 | 0.549 | 0.56  | 0.569 |       |
| South Asia        | 0.288 | 0.293 | 0.298 | 0.303 | 0.309 | 0.314 | 0.32  | 0.327 | 0.334 | 0.341 | 0.349 | 0.356 | 0.364 | 0.371 | 0.378 | 0.386 | 0.394 | 0.402 | 0.409 | 0.417 | 0.425 | 0.432 | 0.44  | 0.447 | 0.455 | 0.464 | 0.473 | 0.482 | 0.491 | 0.5   | 0.51  | 0.519 | 0.529 | 0.539 | 0.549 | 0.56  | 0.569 |       |
| Bangladesh        | 0.254 | 0.258 | 0.263 | 0.269 | 0.275 | 0.281 | 0.287 | 0.294 | 0.3   | 0.307 | 0.315 | 0.323 | 0.331 | 0.339 | 0.347 | 0.355 | 0.363 | 0.371 | 0.378 | 0.386 | 0.394 | 0.402 | 0.41  | 0.418 | 0.426 | 0.434 | 0.442 | 0.45  | 0.459 | 0.467 | 0.476 | 0.485 | 0.494 | 0.503 | 0.511 |       |       |       |
| Bhutan            | 0.237 | 0.242 | 0.247 | 0.253 | 0.259 | 0.265 | 0.272 | 0.279 | 0.286 | 0.293 | 0.301 | 0.31  | 0.318 | 0.327 | 0.337 | 0.348 | 0.359 | 0.37  | 0.382 | 0.394 | 0.406 | 0.418 | 0.431 | 0.444 | 0.457 | 0.47  | 0.482 | 0.494 | 0.506 | 0.518 | 0.53  | 0.541 | 0.552 | 0.563 | 0.572 | 0.581 | 0.588 |       |
| India             | 0.298 | 0.303 | 0.308 | 0.313 | 0.318 | 0.324 | 0.329 | 0.336 | 0.342 | 0.35  | 0.357 | 0.364 | 0.371 | 0.378 | 0.385 | 0.393 | 0.401 | 0.408 | 0.416 | 0.424 | 0.432 | 0.44  | 0.447 | 0.455 | 0.464 | 0.473 | 0.482 | 0.492 | 0.502 | 0.512 | 0.522 | 0.533 | 0.543 | 0.553 | 0.563 | 0.574 | 0.584 |       |
| Nepal             | 0.194 | 0.198 | 0.202 | 0.206 | 0.21  | 0.214 | 0.219 | 0.224 | 0.23  | 0.236 | 0.242 | 0.25  | 0.258 | 0.266 | 0.276 | 0.285 | 0.293 | 0.302 | 0.31  | 0.319 | 0.328 | 0.337 | 0.346 | 0.354 | 0.362 | 0.37  | 0.377 | 0.384 | 0.391 | 0.398 | 0.404 | 0.411 | 0.417 | 0.424 | 0.433 | 0.443 | 0.452 |       |
| Pakistan          | 0.216 | 0.218 | 0.22  | 0.223 | 0.227 | 0.234 | 0.243 | 0.255 | 0.268 | 0.282 | 0.297 | 0.309 | 0.32  | 0.33  | 0.339 | 0.349 | 0.36  | 0.371 | 0.383 | 0.392 | 0.4   | 0.408 | 0.416 | 0.424 | 0.431 | 0.438 | 0.443 | 0.448 | 0.453 | 0.458 | 0.464 | 0.471 | 0.478 | 0.488 | 0.499 | 0.51  | 0.519 |       |
| Andhra Pradesh    | 0.276 | 0.281 | 0.285 | 0.29  | 0.294 | 0.299 | 0.303 | 0.309 | 0.315 | 0.322 | 0.329 | 0.337 | 0.345 | 0.354 | 0.363 | 0.373 | 0.383 | 0.393 | 0.403 | 0.414 | 0.424 | 0.434 | 0.444 | 0.453 | 0.463 | 0.472 | 0.481 | 0.493 | 0.503 | 0.514 | 0.525 | 0.536 | 0.546 | 0.556 | 0.566 | 0.577 | 0.585 |       |
| Arunachal Pradesh | 0.263 | 0.269 | 0.274 | 0.28  | 0.286 | 0.292 | 0.3   | 0.307 | 0.315 | 0.322 | 0.33  | 0.338 | 0.346 | 0.354 | 0.362 | 0.371 | 0.38  | 0.389 | 0.397 | 0.405 | 0.413 | 0.422 | 0.43  | 0.438 | 0.447 | 0.457 | 0.466 | 0.477 | 0.487 | 0.5   | 0.513 | 0.526 | 0.539 | 0.552 | 0.565 | 0.578 | 0.589 |       |
| Assam             | 0.292 | 0.298 | 0.304 | 0.311 | 0.318 | 0.325 | 0.332 | 0.339 | 0.346 | 0.353 | 0.361 | 0.367 | 0.373 | 0.378 | 0.383 | 0.389 | 0.394 | 0.4   | 0.405 | 0.413 | 0.421 | 0.429 | 0.437 | 0.446 | 0.454 | 0.462 | 0.471 | 0.479 | 0.487 | 0.496 | 0.504 | 0.514 | 0.523 | 0.532 | 0.542 | 0.552 | 0.562 |       |
| Bihar             | 0.25  | 0.255 | 0.26  | 0.264 | 0.27  | 0.275 | 0.281 | 0.287 | 0.294 | 0.3   | 0.306 | 0.312 | 0.317 | 0.318 | 0.319 | 0.318 | 0.318 | 0.319 | 0.317 | 0.317 | 0.318 | 0.321 | 0.325 | 0.329 | 0.334 | 0.338 | 0.346 | 0.354 | 0.363 | 0.371 | 0.38  | 0.39  | 0.4   | 0.411 | 0.421 | 0.431 | 0.44  |       |
| Chhattisgarh      | 0.256 | 0.26  | 0.264 | 0.269 | 0.273 | 0.277 | 0.282 | 0.287 | 0.292 | 0.298 | 0.304 | 0.31  | 0.316 | 0.323 | 0.329 | 0.336 | 0.344 | 0.352 | 0.36  | 0.369 | 0.376 | 0.382 | 0.389 | 0.395 | 0.405 | 0.414 | 0.425 | 0.436 | 0.449 | 0.461 | 0.473 | 0.485 | 0.497 | 0.509 | 0.521 | 0.534 | 0.547 | 0.558 |
| Delhi             | 0.471 | 0.478 | 0.484 | 0.49  | 0.495 | 0.5   | 0.505 | 0.51  | 0.515 | 0.52  | 0.524 | 0.529 | 0.533 | 0.538 | 0.544 | 0.55  | 0.557 | 0.565 | 0.573 | 0.582 | 0.592 | 0.602 | 0.612 | 0.623 | 0.633 | 0.643 | 0.653 | 0.664 | 0.674 | 0.684 | 0.694 | 0.705 | 0.715 | 0.724 | 0.734 | 0.744 | 0.752 |       |
| Goa               | 0.394 | 0.401 | 0.409 | 0.416 | 0.424 | 0.432 | 0.44  | 0.448 | 0.456 | 0.465 | 0.473 | 0.481 | 0.49  | 0.5   | 0.511 | 0.523 | 0.535 | 0.547 | 0.561 | 0.573 | 0.586 | 0.597 | 0.608 | 0.616 | 0.623 | 0.631 | 0.638 | 0.645 | 0.654 | 0.664 | 0.673 | 0.686 | 0.696 | 0.707 | 0.718 | 0.729 | 0.738 |       |
| Gujarat           | 0.319 | 0.326 | 0.331 | 0.338 | 0.345 | 0.352 | 0.359 | 0.365 | 0.373 | 0.38  | 0.389 | 0.395 | 0.403 | 0.411 | 0.42  | 0.429 | 0.439 | 0.448 | 0.457 | 0.465 | 0.473 | 0.48  | 0.487 | 0.495 | 0.503 | 0.512 | 0.522 | 0.532 | 0.542 | 0.551 | 0.561 | 0.571 | 0.58  | 0.589 | 0.598 | 0.607 | 0.615 |       |
| Haryana           | 0.317 | 0.324 | 0.331 | 0.338 | 0.345 | 0.353 | 0.361 | 0.368 | 0.377 | 0.386 | 0.395 | 0.405 | 0.413 | 0.422 | 0.431 | 0.44  | 0.449 | 0.458 | 0.467 | 0.475 | 0.484 | 0.494 | 0.503 | 0.513 | 0.524 | 0.534 | 0.545 | 0.557 | 0.569 | 0.58  | 0.591 | 0.602 | 0.613 | 0.624 | 0.635 | 0.646 | 0.655 |       |
| Himachal Pradesh  | 0.289 | 0.296 | 0.303 | 0.311 | 0.318 | 0.326 | 0.334 | 0.343 | 0.353 | 0.363 | 0.374 | 0.385 | 0.396 | 0.407 | 0.419 | 0.43  | 0.443 | 0.456 | 0.469 | 0.483 | 0.496 | 0.508 | 0.52  | 0.531 | 0.541 | 0.553 | 0.564 | 0.575 | 0.587 | 0.598 | 0.61  | 0.622 | 0.633 | 0.644 | 0.654 | 0.662 | 0.669 |       |
| Jammu and Kashmir | 0.276 | 0.282 | 0.288 | 0.295 | 0.301 | 0.308 | 0.316 | 0.322 | 0.329 | 0.336 | 0.343 | 0.349 | 0.353 | 0.361 | 0.369 | 0.377 | 0.384 | 0.395 | 0.405 | 0.417 | 0.429 | 0.441 | 0.452 | 0.464 | 0.475 | 0.486 | 0.497 | 0.507 | 0.518 | 0.528 | 0.539 | 0.549 | 0.559 | 0.569 | 0.579 | 0.589 | 0.598 |       |
| Jharkhand         | 0.259 | 0.262 | 0.266 | 0.269 | 0.273 | 0.277 | 0.281 | 0.285 | 0.29  | 0.295 | 0.3   | 0.306 | 0.311 | 0.316 | 0.322 | 0.329 | 0.334 | 0.342 | 0.35  | 0.358 | 0.365 | 0.373 | 0.381 | 0.389 | 0.397 | 0.406 | 0.415 | 0.424 | 0.433 | 0.442 | 0.453 | 0.464 | 0.475 | 0.487 | 0.499 | 0.512 | 0.523 |       |
| Karnataka         | 0.296 | 0.301 | 0.306 | 0.312 | 0.318 | 0.324 | 0.33  | 0.337 | 0.344 | 0.352 | 0.36  | 0.368 | 0.376 | 0.385 | 0.395 | 0.405 | 0.415 | 0.425 | 0.436 | 0.447 | 0.457 | 0.465 | 0.474 | 0.481 | 0.49  | 0.499 | 0.509 | 0.521 | 0.532 | 0.543 | 0.554 | 0.565 | 0.576 | 0.586 | 0.596 | 0.606 | 0.614 |       |
| Kerala            | 0.369 | 0.374 | 0.379 | 0.385 | 0.391 | 0.396 | 0.403 | 0.409 | 0.415 | 0.422 | 0.429 | 0.436 | 0.444 | 0.454 | 0.464 | 0.476 | 0.488 | 0.5   | 0.512 | 0.524 | 0.535 | 0.545 | 0.553 | 0.562 | 0.571 | 0.58  | 0.589 | 0.599 | 0.608 | 0.619 | 0.629 | 0.638 | 0.648 | 0.657 | 0.667 | 0.676 | 0.683 |       |
| Madhya Pradesh    | 0.271 | 0.275 | 0.28  | 0.286 | 0.291 | 0.297 | 0.303 | 0.309 | 0.317 | 0.324 | 0.332 | 0.339 | 0.345 | 0.35  | 0.355 | 0.36  | 0.365 | 0.37  | 0.375 | 0.38  | 0.385 | 0.391 | 0.397 | 0.404 | 0.411 | 0.418 | 0.425 | 0.433 | 0.441 | 0.45  | 0.459 | 0.47  | 0.481 | 0.494 | 0.507 | 0.52  | 0.532 |       |
| Maharashtra       | 0.339 | 0.346 | 0.353 | 0.36  | 0.368 | 0.375 | 0.383 | 0.391 | 0.399 | 0.408 | 0.418 | 0.426 | 0.435 | 0.444 | 0.454 | 0.464 | 0.475 | 0.485 | 0.494 | 0.503 | 0.512 | 0.519 | 0.526 | 0.534 | 0.543 | 0.553 | 0.564 | 0.576 | 0.588 | 0.599 | 0.61  | 0.62  | 0.63  | 0.639 | 0.648 | 0.658 | 0.666 |       |
| Manipur           | 0.28  | 0.288 | 0.295 | 0.302 | 0.31  | 0.318 | 0.326 | 0.336 | 0.346 | 0.355 | 0.364 | 0.372 | 0.38  | 0.386 | 0.391 | 0.395 | 0.4   | 0.406 | 0.413 | 0.423 | 0.433 | 0.444 | 0.455 | 0.467 | 0.48  | 0.494 | 0.507 | 0.518 | 0.529 | 0.54  | 0.549 | 0.56  | 0.571 | 0.581 | 0.591 | 0.601 | 0.61  |       |
| Meghalaya         | 0.287 | 0.291 | 0.296 | 0.3   | 0.305 | 0.31  | 0.316 | 0.323 | 0.328 | 0.335 | 0.342 | 0.348 | 0.353 | 0.358 | 0.36  | 0.363 | 0.367 | 0.372 | 0.379 | 0.389 | 0.402 | 0.417 | 0.431 | 0.443 | 0.455 | 0.467 | 0.477 | 0.488 | 0.498 | 0.508 | 0.519 | 0.53  | 0.541 | 0.552 | 0.563 | 0.575 | 0.585 |       |
| Mizoram           | 0.334 | 0.34  | 0.346 | 0.352 | 0.359 | 0.369 | 0.378 | 0.39  | 0.399 | 0.407 | 0.414 | 0.422 | 0.429 | 0.436 | 0.44  | 0.446 | 0.453 | 0.459 | 0.465 | 0.473 | 0.482 | 0.492 | 0.502 | 0.511 | 0.52  | 0.528 | 0.537 | 0.545 | 0.553 | 0.562 | 0.572 | 0.581 | 0.591 | 0.601 | 0.611 | 0.621 | 0.63  |       |
| Nagaland          | 0.343 | 0.348 | 0.354 | 0.36  | 0.366 | 0.371 | 0.377 | 0.383 | 0.389 | 0.395 | 0.401 | 0.406 | 0.409 | 0.413 | 0.416 | 0.419 | 0.422 | 0.428 | 0.434 | 0.442 | 0.456 | 0.473 | 0.49  | 0.505 | 0.519 | 0.533 | 0.545 | 0.559 | 0.572 | 0.585 | 0.597 | 0.61  | 0.622 | 0.634 | 0.645 | 0.654 | 0.661 |       |
| Odisha            | 0.251 | 0.255 | 0.259 | 0.264 | 0.269 | 0.274 | 0.28  | 0.285 | 0.292 | 0.299 | 0.305 | 0.312 | 0.318 | 0.324 | 0.33  | 0.338 | 0.344 | 0.351 | 0.359 | 0.368 | 0.376 | 0.385 | 0.393 | 0.402 | 0.413 | 0.422 | 0.433 | 0.445 | 0.457 | 0.468 | 0.48  | 0.491 | 0.503 | 0.514 | 0.526 | 0.537 | 0.547 |       |
| Punjab            | 0.329 | 0.337 | 0.344 | 0.352 | 0.359 | 0.367 | 0.375 | 0.383 | 0.392 | 0.401 | 0.409 | 0.418 | 0.427 | 0.436 | 0.445 | 0.455 | 0.465 | 0.474 | 0.484 | 0.493 | 0.503 | 0.515 | 0.527 | 0.535 | 0.545 | 0.555 | 0.566 | 0.576 | 0.587 | 0.598 | 0.608 | 0.618 | 0.627 | 0.636 | 0.643 | 0.65  |       |       |
| Rajasthan         | 0.254 | 0.259 | 0.263 | 0.27  | 0.275 | 0.28  | 0.286 | 0.292 | 0.299 | 0.306 | 0.315 | 0.322 | 0.329 | 0.335 | 0.341 | 0.348 | 0.355 | 0.362 | 0.368 | 0.375 | 0.382 | 0.39  | 0.397 | 0.405 | 0.414 | 0.422 | 0.43  | 0.44  | 0.449 | 0.457 | 0.468 | 0.479 | 0.49  | 0.5   | 0.511 | 0.521 | 0.53  |       |
| Sikkim            | 0.268 | 0.273 | 0.279 | 0.284 | 0.29  | 0.297 | 0.304 | 0.313 | 0.321 | 0.329 | 0.337 | 0.346 | 0.352 | 0.361 | 0.369 | 0.378 | 0.388 | 0.398 | 0.408 | 0.418 | 0.43  | 0.441 | 0.453 | 0.466 | 0.478 | 0.49  | 0.501 | 0.511 | 0.52  | 0.536 | 0.551 | 0.565 | 0.579 | 0.593 | 0.607 | 0.62  | 0.632 |       |
| Tamil Nadu        | 0.309 | 0.315 | 0.319 | 0.325 | 0.33  | 0.337 | 0.343 | 0.351 | 0.359 | 0.367 | 0.376 | 0.385 | 0.395 | 0.405 | 0.417 | 0.428 | 0.44  | 0.452 | 0.464 | 0.476 | 0.487 |       |       |       |       |       |       |       |       |       |       |       |       |       |       |       |       |       |

Appendix Table 11: Socio-Demographic Index values for all estimated GBD 2016 locations, 1980–2016

| Location                 | 1980  | 1981  | 1982  | 1983  | 1984  | 1985  | 1986  | 1987  | 1988  | 1989  | 1990  | 1991  | 1992  | 1993  | 1994  | 1995  | 1996  | 1997  | 1998  | 1999  | 2000  | 2001  | 2002  | 2003  | 2004  | 2005  | 2006  | 2007  | 2008  | 2009  | 2010  | 2011  | 2012  | 2013  | 2014  | 2015  | 2016  |
|--------------------------|-------|-------|-------|-------|-------|-------|-------|-------|-------|-------|-------|-------|-------|-------|-------|-------|-------|-------|-------|-------|-------|-------|-------|-------|-------|-------|-------|-------|-------|-------|-------|-------|-------|-------|-------|-------|-------|
| Himachal Pradesh, Rural  | 0.275 | 0.282 | 0.289 | 0.297 | 0.304 | 0.312 | 0.32  | 0.329 | 0.339 | 0.349 | 0.36  | 0.37  | 0.381 | 0.393 | 0.404 | 0.416 | 0.429 | 0.442 | 0.455 | 0.469 | 0.482 | 0.495 | 0.506 | 0.517 | 0.528 | 0.539 | 0.551 | 0.563 | 0.574 | 0.585 | 0.598 | 0.61  | 0.621 | 0.632 | 0.643 | 0.652 | 0.659 |
| Jammu and Kashmir, Urban | 0.366 | 0.374 | 0.383 | 0.392 | 0.401 | 0.411 | 0.42  | 0.428 | 0.437 | 0.444 | 0.451 | 0.457 | 0.462 | 0.47  | 0.478 | 0.486 | 0.494 | 0.506 | 0.515 | 0.528 | 0.54  | 0.551 | 0.562 | 0.572 | 0.581 | 0.59  | 0.599 | 0.607 | 0.615 | 0.623 | 0.629 | 0.636 | 0.643 | 0.65  | 0.657 | 0.664 | 0.671 |
| Jammu and Kashmir, Rural | 0.247 | 0.252 | 0.258 | 0.263 | 0.269 | 0.275 | 0.282 | 0.287 | 0.294 | 0.301 | 0.307 | 0.312 | 0.317 | 0.324 | 0.332 | 0.339 | 0.346 | 0.357 | 0.366 | 0.378 | 0.389 | 0.4   | 0.412 | 0.423 | 0.435 | 0.446 | 0.458 | 0.468 | 0.479 | 0.49  | 0.5   | 0.511 | 0.522 | 0.532 | 0.543 | 0.553 | 0.562 |
| Jharkhand, Urban         | 0.453 | 0.457 | 0.462 | 0.466 | 0.469 | 0.472 | 0.476 | 0.479 | 0.483 | 0.487 | 0.492 | 0.497 | 0.502 | 0.508 | 0.514 | 0.521 | 0.527 | 0.536 | 0.545 | 0.554 | 0.561 | 0.569 | 0.577 | 0.584 | 0.591 | 0.599 | 0.607 | 0.615 | 0.622 | 0.63  | 0.638 | 0.646 | 0.653 | 0.659 | 0.666 | 0.673 | 0.679 |
| Jharkhand, Rural         | 0.233 | 0.236 | 0.239 | 0.242 | 0.245 | 0.248 | 0.251 | 0.255 | 0.259 | 0.264 | 0.269 | 0.274 | 0.279 | 0.285 | 0.292 | 0.299 | 0.305 | 0.313 | 0.321 | 0.33  | 0.338 | 0.346 | 0.354 | 0.362 | 0.37  | 0.379 | 0.387 | 0.397 | 0.405 | 0.415 | 0.425 | 0.436 | 0.448 | 0.459 | 0.472 | 0.485 | 0.496 |
| Karnataka, Urban         | 0.391 | 0.398 | 0.404 | 0.412 | 0.42  | 0.428 | 0.434 | 0.441 | 0.449 | 0.456 | 0.463 | 0.471 | 0.478 | 0.486 | 0.495 | 0.505 | 0.515 | 0.525 | 0.536 | 0.546 | 0.557 | 0.565 | 0.574 | 0.581 | 0.589 | 0.598 | 0.607 | 0.616 | 0.624 | 0.631 | 0.639 | 0.647 | 0.655 | 0.664 | 0.672 | 0.681 | 0.688 |
| Karnataka, Rural         | 0.251 | 0.256 | 0.26  | 0.264 | 0.269 | 0.274 | 0.28  | 0.286 | 0.292 | 0.299 | 0.306 | 0.314 | 0.322 | 0.33  | 0.339 | 0.348 | 0.357 | 0.367 | 0.377 | 0.387 | 0.397 | 0.406 | 0.415 | 0.423 | 0.432 | 0.442 | 0.453 | 0.464 | 0.475 | 0.485 | 0.496 | 0.507 | 0.518 | 0.529 | 0.54  | 0.552 | 0.561 |
| Kerala, Urban            | 0.408 | 0.412 | 0.417 | 0.422 | 0.428 | 0.432 | 0.438 | 0.443 | 0.448 | 0.454 | 0.46  | 0.466 | 0.474 | 0.483 | 0.494 | 0.506 | 0.518 | 0.53  | 0.542 | 0.554 | 0.565 | 0.574 | 0.582 | 0.589 | 0.597 | 0.605 | 0.613 | 0.621 | 0.629 | 0.638 | 0.646 | 0.655 | 0.664 | 0.673 | 0.683 | 0.692 | 0.699 |
| Kerala, Rural            | 0.358 | 0.363 | 0.368 | 0.374 | 0.38  | 0.385 | 0.391 | 0.397 | 0.404 | 0.411 | 0.418 | 0.425 | 0.433 | 0.442 | 0.452 | 0.464 | 0.476 | 0.488 | 0.5   | 0.513 | 0.524 | 0.534 | 0.543 | 0.551 | 0.559 | 0.568 | 0.577 | 0.586 | 0.595 | 0.605 | 0.613 | 0.623 | 0.632 | 0.642 | 0.653 | 0.662 | 0.669 |
| Madhya Pradesh, Urban    | 0.403 | 0.409 | 0.415 | 0.422 | 0.428 | 0.435 | 0.441 | 0.448 | 0.455 | 0.461 | 0.469 | 0.476 | 0.483 | 0.49  | 0.497 | 0.504 | 0.511 | 0.517 | 0.522 | 0.527 | 0.531 | 0.535 | 0.538 | 0.541 | 0.545 | 0.55  | 0.557 | 0.564 | 0.572 | 0.581 | 0.591 | 0.6   | 0.609 | 0.618 | 0.626 | 0.635 | 0.643 |
| Madhya Pradesh, Rural    | 0.229 | 0.232 | 0.236 | 0.24  | 0.245 | 0.249 | 0.254 | 0.26  | 0.266 | 0.272 | 0.28  | 0.286 | 0.292 | 0.296 | 0.3   | 0.305 | 0.309 | 0.314 | 0.318 | 0.322 | 0.325 | 0.331 | 0.336 | 0.342 | 0.349 | 0.355 | 0.362 | 0.37  | 0.378 | 0.388 | 0.399 | 0.411 | 0.423 | 0.436 | 0.451 | 0.465 | 0.478 |
| Maharashtra, Urban       | 0.421 | 0.428 | 0.436 | 0.444 | 0.451 | 0.458 | 0.465 | 0.472 | 0.478 | 0.486 | 0.493 | 0.499 | 0.506 | 0.514 | 0.522 | 0.531 | 0.54  | 0.55  | 0.558 | 0.568 | 0.578 | 0.584 | 0.591 | 0.598 | 0.606 | 0.616 | 0.627 | 0.638 | 0.648 | 0.658 | 0.668 | 0.678 | 0.695 | 0.703 | 0.712 | 0.719 |       |
| Maharashtra, Rural       | 0.288 | 0.295 | 0.301 | 0.308 | 0.314 | 0.322 | 0.329 | 0.337 | 0.345 | 0.354 | 0.364 | 0.373 | 0.382 | 0.391 | 0.4   | 0.41  | 0.421 | 0.43  | 0.439 | 0.449 | 0.457 | 0.464 | 0.472 | 0.48  | 0.488 | 0.498 | 0.51  | 0.522 | 0.533 | 0.544 | 0.556 | 0.567 | 0.577 | 0.586 | 0.596 | 0.607 | 0.615 |
| Manipur, Urban           | 0.346 | 0.353 | 0.361 | 0.369 | 0.378 | 0.385 | 0.393 | 0.402 | 0.411 | 0.419 | 0.427 | 0.434 | 0.441 | 0.447 | 0.453 | 0.458 | 0.465 | 0.472 | 0.479 | 0.489 | 0.498 | 0.509 | 0.519 | 0.53  | 0.541 | 0.554 | 0.564 | 0.574 | 0.582 | 0.592 | 0.6   | 0.609 | 0.618 | 0.627 | 0.636 | 0.643 | 0.65  |
| Manipur, Rural           | 0.265 | 0.272 | 0.278 | 0.285 | 0.292 | 0.299 | 0.306 | 0.315 | 0.324 | 0.332 | 0.341 | 0.349 | 0.356 | 0.362 | 0.367 | 0.371 | 0.375 | 0.381 | 0.387 | 0.397 | 0.408 | 0.419 | 0.43  | 0.442 | 0.455 | 0.469 | 0.482 | 0.494 | 0.504 | 0.515 | 0.525 | 0.535 | 0.545 | 0.555 | 0.565 | 0.575 | 0.585 |
| Meghalaya, Urban         | 0.456 | 0.459 | 0.46  | 0.462 | 0.463 | 0.465 | 0.466 | 0.468 | 0.469 | 0.471 | 0.473 | 0.474 | 0.476 | 0.478 | 0.484 | 0.49  | 0.498 | 0.506 | 0.516 | 0.529 | 0.545 | 0.559 | 0.572 | 0.584 | 0.595 | 0.605 | 0.613 | 0.621 | 0.63  | 0.638 | 0.648 | 0.657 | 0.667 | 0.677 | 0.687 | 0.696 |       |
| Meghalaya, Rural         | 0.25  | 0.254 | 0.258 | 0.263 | 0.268 | 0.273 | 0.279 | 0.286 | 0.292 | 0.299 | 0.307 | 0.313 | 0.319 | 0.323 | 0.325 | 0.328 | 0.331 | 0.336 | 0.342 | 0.352 | 0.365 | 0.379 | 0.393 | 0.406 | 0.417 | 0.429 | 0.44  | 0.451 | 0.461 | 0.472 | 0.483 | 0.495 | 0.505 | 0.516 | 0.528 | 0.54  | 0.55  |
| Mizoram, Urban           | 0.383 | 0.389 | 0.395 | 0.401 | 0.408 | 0.417 | 0.426 | 0.437 | 0.446 | 0.453 | 0.459 | 0.466 | 0.472 | 0.479 | 0.485 | 0.492 | 0.5   | 0.508 | 0.514 | 0.522 | 0.531 | 0.54  | 0.548 | 0.555 | 0.562 | 0.568 | 0.575 | 0.581 | 0.587 | 0.593 | 0.601 | 0.608 | 0.616 | 0.625 | 0.633 | 0.643 | 0.651 |
| Mizoram, Rural           | 0.292 | 0.298 | 0.303 | 0.309 | 0.315 | 0.325 | 0.334 | 0.346 | 0.355 | 0.363 | 0.37  | 0.378 | 0.385 | 0.392 | 0.395 | 0.398 | 0.404 | 0.408 | 0.413 | 0.42  | 0.43  | 0.44  | 0.451 | 0.461 | 0.472 | 0.482 | 0.491 | 0.502 | 0.512 | 0.523 | 0.535 | 0.546 | 0.557 | 0.568 | 0.58  | 0.591 | 0.6   |
| Nagaland, Urban          | 0.446 | 0.451 | 0.458 | 0.466 | 0.473 | 0.48  | 0.486 | 0.494 | 0.501 | 0.507 | 0.513 | 0.517 | 0.521 | 0.525 | 0.527 | 0.53  | 0.532 | 0.536 | 0.54  | 0.544 | 0.553 | 0.564 | 0.576 | 0.586 | 0.595 | 0.604 | 0.612 | 0.622 | 0.632 | 0.641 | 0.65  | 0.66  | 0.67  | 0.68  | 0.691 | 0.702 | 0.711 |
| Nagaland, Rural          | 0.328 | 0.333 | 0.338 | 0.343 | 0.348 | 0.353 | 0.357 | 0.363 | 0.368 | 0.374 | 0.379 | 0.383 | 0.387 | 0.39  | 0.393 | 0.395 | 0.399 | 0.405 | 0.412 | 0.42  | 0.435 | 0.452 | 0.469 | 0.484 | 0.498 | 0.512 | 0.524 | 0.537 | 0.55  | 0.563 | 0.575 | 0.588 | 0.6   | 0.611 | 0.622 | 0.629 | 0.637 |
| Odisha, Urban            | 0.37  | 0.376 | 0.382 | 0.389 | 0.396 | 0.403 | 0.411 | 0.417 | 0.424 | 0.432 | 0.438 | 0.444 | 0.45  | 0.455 | 0.461 | 0.469 | 0.474 | 0.481 | 0.488 | 0.496 | 0.504 | 0.512 | 0.519 | 0.527 | 0.536 | 0.544 | 0.552 | 0.561 | 0.569 | 0.575 | 0.583 | 0.591 | 0.599 | 0.608 | 0.617 | 0.627 | 0.635 |
| Odisha, Rural            | 0.233 | 0.237 | 0.24  | 0.245 | 0.248 | 0.253 | 0.259 | 0.263 | 0.269 | 0.276 | 0.281 | 0.287 | 0.293 | 0.299 | 0.305 | 0.312 | 0.318 | 0.325 | 0.333 | 0.341 | 0.35  | 0.358 | 0.366 | 0.376 | 0.387 | 0.397 | 0.408 | 0.42  | 0.432 | 0.443 | 0.455 | 0.467 | 0.479 | 0.49  | 0.502 | 0.514 | 0.524 |
| Punjab, Urban            | 0.441 | 0.449 | 0.456 | 0.463 | 0.47  | 0.477 | 0.484 | 0.491 | 0.498 | 0.506 | 0.513 | 0.519 | 0.526 | 0.533 | 0.541 | 0.548 | 0.556 | 0.564 | 0.571 | 0.578 | 0.585 | 0.592 | 0.598 | 0.605 | 0.611 | 0.619 | 0.627 | 0.636 | 0.645 | 0.654 | 0.662 | 0.671 | 0.679 | 0.688 | 0.696 | 0.703 | 0.709 |
| Punjab, Rural            | 0.286 | 0.293 | 0.3   | 0.307 | 0.314 | 0.322 | 0.33  | 0.338 | 0.346 | 0.355 | 0.364 | 0.373 | 0.381 | 0.39  | 0.399 | 0.408 | 0.418 | 0.427 | 0.437 | 0.447 | 0.457 | 0.466 | 0.474 | 0.483 | 0.492 | 0.502 | 0.513 | 0.524 | 0.535 | 0.546 | 0.556 | 0.566 | 0.577 | 0.587 | 0.596 | 0.604 | 0.611 |
| Rajasthan, Urban         | 0.374 | 0.379 | 0.384 | 0.39  | 0.396 | 0.402 | 0.407 | 0.412 | 0.419 | 0.425 | 0.433 | 0.44  | 0.446 | 0.452 | 0.459 | 0.465 | 0.473 | 0.481 | 0.489 | 0.499 | 0.507 | 0.516 | 0.523 | 0.531 | 0.539 | 0.546 | 0.554 | 0.561 | 0.569 | 0.576 | 0.585 | 0.594 | 0.602 | 0.61  | 0.618 | 0.626 | 0.632 |
| Rajasthan, Rural         | 0.218 | 0.222 | 0.226 | 0.232 | 0.236 | 0.241 | 0.246 | 0.251 | 0.258 | 0.265 | 0.273 | 0.28  | 0.286 | 0.292 | 0.299 | 0.305 | 0.312 | 0.318 | 0.324 | 0.331 | 0.337 | 0.345 | 0.352 | 0.36  | 0.368 | 0.376 | 0.385 | 0.395 | 0.404 | 0.412 | 0.423 | 0.434 | 0.445 | 0.456 | 0.467 | 0.478 | 0.487 |
| Sikkim, Urban            | 0.371 | 0.377 | 0.386 | 0.394 | 0.404 | 0.414 | 0.426 | 0.437 | 0.448 | 0.459 | 0.469 | 0.477 | 0.483 | 0.491 | 0.498 | 0.504 | 0.511 | 0.518 | 0.525 | 0.533 | 0.542 | 0.551 | 0.56  | 0.57  | 0.579 | 0.588 | 0.595 | 0.601 | 0.605 | 0.618 | 0.628 | 0.639 | 0.649 | 0.66  | 0.672 | 0.685 | 0.695 |
| Sikkim, Rural            | 0.257 | 0.261 | 0.266 | 0.271 | 0.276 | 0.283 | 0.29  | 0.297 | 0.305 | 0.313 | 0.321 | 0.329 | 0.335 | 0.343 | 0.352 | 0.36  | 0.37  | 0.38  | 0.39  | 0.4   | 0.411 | 0.422 | 0.434 | 0.445 | 0.457 | 0.469 | 0.479 | 0.489 | 0.496 | 0.513 | 0.527 | 0.545 | 0.565 | 0.584 | 0.598 | 0.61  |       |
| Tamil Nadu, Urban        | 0.391 | 0.398 | 0.403 | 0.408 | 0.413 | 0.419 | 0.425 | 0.432 | 0.439 | 0.446 | 0.453 | 0.459 | 0.467 | 0.476 | 0.486 | 0.495 | 0.505 | 0.515 | 0.526 | 0.537 | 0.547 | 0.557 | 0.565 | 0.573 | 0.581 | 0.59  | 0.599 | 0.609 | 0.617 | 0.627 | 0.636 | 0.646 | 0.656 | 0.667 | 0.678 | 0.686 | 0.693 |
| Tamil Nadu, Rural        | 0.264 | 0.27  | 0.274 | 0.279 | 0.285 | 0.292 | 0.299 | 0.307 | 0.315 | 0.324 | 0.333 | 0.341 | 0.35  | 0.359 | 0.369 | 0.379 | 0.389 | 0.399 | 0.411 | 0.422 | 0.433 | 0.443 | 0.453 | 0.462 | 0.472 | 0.483 | 0.494 | 0.506 | 0.516 | 0.528 | 0.539 | 0.551 | 0.562 | 0.574 | 0.586 | 0.595 | 0.603 |
| Telangana, Urban         | 0.37  | 0.376 | 0.382 | 0.389 | 0.396 | 0.402 | 0.409 | 0.416 | 0.424 | 0.432 | 0.44  | 0.449 | 0.457 | 0.4   |       |       |       |       |       |       |       |       |       |       |       |       |       |       |       |       |       |       |       |       |       |       |       |

Appendix Table 11: Socio-Demographic Index values for all estimated GBD 2016 locations, 1980–2016

| Location      | 1980  | 1981  | 1982  | 1983  | 1984  | 1985  | 1986  | 1987  | 1988  | 1989  | 1990  | 1991  | 1992  | 1993  | 1994  | 1995  | 1996  | 1997  | 1998  | 1999  | 2000  | 2001  | 2002  | 2003  | 2004  | 2005  | 2006  | 2007  | 2008  | 2009  | 2010  | 2011  | 2012  | 2013  | 2014  | 2015  | 2016  |
|---------------|-------|-------|-------|-------|-------|-------|-------|-------|-------|-------|-------|-------|-------|-------|-------|-------|-------|-------|-------|-------|-------|-------|-------|-------|-------|-------|-------|-------|-------|-------|-------|-------|-------|-------|-------|-------|-------|
| Kenya         | 0.22  | 0.232 | 0.245 | 0.257 | 0.269 | 0.28  | 0.291 | 0.302 | 0.313 | 0.323 | 0.335 | 0.346 | 0.357 | 0.367 | 0.376 | 0.384 | 0.393 | 0.4   | 0.405 | 0.41  | 0.415 | 0.42  | 0.425 | 0.429 | 0.434 | 0.44  | 0.446 | 0.452 | 0.459 | 0.465 | 0.473 | 0.48  | 0.489 | 0.498 | 0.506 | 0.514 | 0.52  |
| Madagascar    | 0.195 | 0.201 | 0.207 | 0.213 | 0.219 | 0.226 | 0.232 | 0.238 | 0.244 | 0.249 | 0.255 | 0.26  | 0.264 | 0.267 | 0.269 | 0.272 | 0.275 | 0.278 | 0.282 | 0.286 | 0.289 | 0.294 | 0.297 | 0.302 | 0.306 | 0.311 | 0.315 | 0.319 | 0.323 | 0.327 | 0.331 | 0.338 | 0.344 | 0.35  | 0.355 | 0.361 | 0.365 |
| Malawi        | 0.143 | 0.149 | 0.155 | 0.161 | 0.167 | 0.175 | 0.182 | 0.188 | 0.194 | 0.199 | 0.205 | 0.21  | 0.215 | 0.219 | 0.223 | 0.227 | 0.232 | 0.238 | 0.243 | 0.249 | 0.254 | 0.258 | 0.263 | 0.268 | 0.273 | 0.279 | 0.284 | 0.29  | 0.296 | 0.302 | 0.308 | 0.314 | 0.32  | 0.326 | 0.334 | 0.342 | 0.348 |
| Mozambique    | 0.131 | 0.133 | 0.135 | 0.136 | 0.137 | 0.138 | 0.138 | 0.139 | 0.14  | 0.142 | 0.145 | 0.149 | 0.151 | 0.153 | 0.157 | 0.158 | 0.165 | 0.172 | 0.18  | 0.186 | 0.193 | 0.2   | 0.207 | 0.214 | 0.22  | 0.226 | 0.231 | 0.236 | 0.242 | 0.247 | 0.253 | 0.26  | 0.268 | 0.277 | 0.287 | 0.297 | 0.306 |
| Rwanda        | 0.065 | 0.067 | 0.068 | 0.069 | 0.07  | 0.071 | 0.089 | 0.12  | 0.144 | 0.164 | 0.181 | 0.197 | 0.208 | 0.217 | 0.22  | 0.223 | 0.226 | 0.23  | 0.234 | 0.237 | 0.24  | 0.244 | 0.25  | 0.256 | 0.263 | 0.272 | 0.282 | 0.293 | 0.303 | 0.318 | 0.33  | 0.342 | 0.354 | 0.365 | 0.374 | 0.383 | 0.39  |
| Somalia       | 0.161 | 0.162 | 0.164 | 0.166 | 0.168 | 0.171 | 0.173 | 0.176 | 0.18  | 0.183 | 0.187 | 0.19  | 0.192 | 0.194 | 0.195 | 0.196 | 0.197 | 0.198 | 0.199 | 0.2   | 0.201 | 0.203 | 0.205 | 0.208 | 0.212 | 0.216 | 0.22  | 0.225 | 0.23  | 0.235 | 0.24  | 0.245 | 0.251 | 0.256 | 0.26  | 0.265 | 0.268 |
| Tanzania      | 0.176 | 0.183 | 0.19  | 0.197 | 0.205 | 0.213 | 0.22  | 0.226 | 0.233 | 0.239 | 0.245 | 0.251 | 0.256 | 0.259 | 0.263 | 0.271 | 0.279 | 0.288 | 0.295 | 0.302 | 0.308 | 0.314 | 0.32  | 0.326 | 0.332 | 0.339 | 0.345 | 0.352 | 0.359 | 0.367 | 0.375 | 0.384 | 0.392 | 0.402 | 0.411 | 0.421 | 0.428 |
| Uganda        | 0.101 | 0.11  | 0.117 | 0.125 | 0.134 | 0.142 | 0.149 | 0.156 | 0.163 | 0.17  | 0.177 | 0.184 | 0.19  | 0.196 | 0.203 | 0.209 | 0.215 | 0.22  | 0.226 | 0.232 | 0.238 | 0.244 | 0.251 | 0.257 | 0.265 | 0.272 | 0.28  | 0.289 | 0.298 | 0.308 | 0.317 | 0.328 | 0.338 | 0.348 | 0.359 | 0.37  | 0.377 |
| Zambia        | 0.193 | 0.205 | 0.216 | 0.228 | 0.239 | 0.251 | 0.261 | 0.271 | 0.281 | 0.291 | 0.299 | 0.307 | 0.315 | 0.321 | 0.326 | 0.331 | 0.336 | 0.34  | 0.343 | 0.346 | 0.35  | 0.354 | 0.357 | 0.362 | 0.366 | 0.371 | 0.377 | 0.385 | 0.393 | 0.401 | 0.41  | 0.419 | 0.428 | 0.437 | 0.446 | 0.454 | 0.46  |
| South Sudan   | 0.053 | 0.054 | 0.054 | 0.055 | 0.056 | 0.056 | 0.057 | 0.062 | 0.07  | 0.077 | 0.082 | 0.088 | 0.092 | 0.095 | 0.098 | 0.102 | 0.105 | 0.108 | 0.111 | 0.114 | 0.117 | 0.12  | 0.123 | 0.127 | 0.13  | 0.134 | 0.138 | 0.143 | 0.148 | 0.152 | 0.158 | 0.164 | 0.17  | 0.176 | 0.182 | 0.188 | 0.192 |
| Central       | 0.292 | 0.305 | 0.318 | 0.33  | 0.343 | 0.356 | 0.368 | 0.379 | 0.39  | 0.401 | 0.413 | 0.425 | 0.435 | 0.444 | 0.453 | 0.462 | 0.47  | 0.478 | 0.482 | 0.487 | 0.492 | 0.497 | 0.501 | 0.505 | 0.51  | 0.515 | 0.521 | 0.527 | 0.533 | 0.54  | 0.546 | 0.553 | 0.56  | 0.566 | 0.573 | 0.58  | 0.585 |
| Coast         | 0.146 | 0.16  | 0.172 | 0.185 | 0.196 | 0.205 | 0.214 | 0.222 | 0.231 | 0.241 | 0.252 | 0.264 | 0.275 | 0.286 | 0.296 | 0.305 | 0.313 | 0.321 | 0.327 | 0.332 | 0.337 | 0.343 | 0.348 | 0.354 | 0.361 | 0.368 | 0.376 | 0.385 | 0.394 | 0.403 | 0.413 | 0.423 | 0.434 | 0.444 | 0.455 | 0.465 | 0.473 |
| Eastern       | 0.196 | 0.209 | 0.221 | 0.233 | 0.245 | 0.256 | 0.266 | 0.277 | 0.287 | 0.298 | 0.31  | 0.322 | 0.333 | 0.344 | 0.353 | 0.362 | 0.371 | 0.379 | 0.385 | 0.391 | 0.396 | 0.401 | 0.407 | 0.412 | 0.418 | 0.424 | 0.431 | 0.438 | 0.445 | 0.452 | 0.46  | 0.467 | 0.475 | 0.483 | 0.49  | 0.498 | 0.503 |
| Nairobi       | 0.42  | 0.431 | 0.442 | 0.453 | 0.464 | 0.475 | 0.486 | 0.496 | 0.506 | 0.516 | 0.526 | 0.536 | 0.545 | 0.553 | 0.56  | 0.567 | 0.574 | 0.58  | 0.585 | 0.589 | 0.593 | 0.598 | 0.602 | 0.607 | 0.611 | 0.617 | 0.623 | 0.63  | 0.637 | 0.644 | 0.652 | 0.66  | 0.669 | 0.677 | 0.685 | 0.694 | 0.701 |
| North Eastern | 0.049 | 0.05  | 0.051 | 0.052 | 0.053 | 0.053 | 0.054 | 0.055 | 0.056 | 0.057 | 0.058 | 0.059 | 0.061 | 0.062 | 0.067 | 0.075 | 0.08  | 0.081 | 0.076 | 0.068 | 0.069 | 0.07  | 0.071 | 0.072 | 0.073 | 0.074 | 0.075 | 0.077 | 0.078 | 0.079 | 0.08  | 0.081 | 0.083 | 0.084 | 0.092 | 0.112 | 0.124 |
| Nyanza        | 0.204 | 0.216 | 0.229 | 0.241 | 0.253 | 0.264 | 0.274 | 0.285 | 0.295 | 0.306 | 0.318 | 0.331 | 0.343 | 0.353 | 0.364 | 0.373 | 0.383 | 0.391 | 0.398 | 0.404 | 0.411 | 0.417 | 0.423 | 0.429 | 0.436 | 0.443 | 0.45  | 0.458 | 0.466 | 0.475 | 0.483 | 0.491 | 0.5   | 0.508 | 0.516 | 0.524 | 0.53  |
| Rift Valley   | 0.173 | 0.188 | 0.202 | 0.216 | 0.228 | 0.239 | 0.249 | 0.259 | 0.269 | 0.28  | 0.292 | 0.305 | 0.316 | 0.327 | 0.337 | 0.347 | 0.356 | 0.363 | 0.37  | 0.375 | 0.381 | 0.386 | 0.392 | 0.397 | 0.403 | 0.41  | 0.417 | 0.424 | 0.432 | 0.44  | 0.448 | 0.457 | 0.465 | 0.474 | 0.482 | 0.491 | 0.497 |
| Western       | 0.228 | 0.24  | 0.251 | 0.263 | 0.274 | 0.284 | 0.294 | 0.303 | 0.312 | 0.322 | 0.332 | 0.343 | 0.353 | 0.362 | 0.37  | 0.378 | 0.385 | 0.391 | 0.396 | 0.4   | 0.404 | 0.408 | 0.412 | 0.416 | 0.421 | 0.426 | 0.431 | 0.437 | 0.443 | 0.45  | 0.456 | 0.463 | 0.47  | 0.477 | 0.484 | 0.491 | 0.496 |
| Kiambu        | 0.313 | 0.327 | 0.341 | 0.355 | 0.368 | 0.382 | 0.394 | 0.406 | 0.41  | 0.452 | 0.462 | 0.47  | 0.478 | 0.486 | 0.493 | 0.498 | 0.503 | 0.507 | 0.511 | 0.515 | 0.518 | 0.519 | 0.523 | 0.527 | 0.531 | 0.536 | 0.541 | 0.547 | 0.553 | 0.559 | 0.566 | 0.574 | 0.581 | 0.588 | 0.596 | 0.601 |       |
| Kirinyaga     | 0.28  | 0.292 | 0.303 | 0.314 | 0.326 | 0.337 | 0.348 | 0.358 | 0.369 | 0.379 | 0.389 | 0.399 | 0.408 | 0.417 | 0.427 | 0.437 | 0.446 | 0.454 | 0.461 | 0.467 | 0.473 | 0.479 | 0.484 | 0.49  | 0.495 | 0.501 | 0.508 | 0.514 | 0.521 | 0.527 | 0.533 | 0.54  | 0.546 | 0.552 | 0.558 | 0.564 | 0.569 |
| Murang'a      | 0.278 | 0.29  | 0.303 | 0.315 | 0.328 | 0.34  | 0.352 | 0.363 | 0.374 | 0.384 | 0.395 | 0.406 | 0.415 | 0.424 | 0.432 | 0.44  | 0.447 | 0.454 | 0.461 | 0.466 | 0.472 | 0.477 | 0.482 | 0.487 | 0.492 | 0.497 | 0.503 | 0.509 | 0.515 | 0.52  | 0.526 | 0.531 | 0.537 | 0.542 | 0.547 | 0.552 | 0.556 |
| Nyandarua     | 0.263 | 0.275 | 0.287 | 0.3   | 0.312 | 0.325 | 0.337 | 0.348 | 0.36  | 0.371 | 0.383 | 0.395 | 0.405 | 0.415 | 0.423 | 0.431 | 0.439 | 0.446 | 0.452 | 0.457 | 0.462 | 0.466 | 0.47  | 0.474 | 0.479 | 0.484 | 0.489 | 0.496 | 0.503 | 0.51  | 0.518 | 0.526 | 0.534 | 0.542 | 0.55  | 0.558 | 0.564 |
| Nyeri         | 0.292 | 0.305 | 0.318 | 0.332 | 0.345 | 0.358 | 0.37  | 0.382 | 0.394 | 0.407 | 0.419 | 0.432 | 0.443 | 0.453 | 0.462 | 0.47  | 0.477 | 0.483 | 0.488 | 0.492 | 0.496 | 0.5   | 0.503 | 0.507 | 0.512 | 0.517 | 0.524 | 0.531 | 0.538 | 0.546 | 0.553 | 0.56  | 0.566 | 0.572 | 0.577 | 0.583 | 0.587 |
| Kilifi        | 0.085 | 0.086 | 0.087 | 0.088 | 0.089 | 0.09  | 0.098 | 0.111 | 0.122 | 0.134 | 0.15  | 0.166 | 0.182 | 0.197 | 0.212 | 0.226 | 0.238 | 0.249 | 0.258 | 0.266 | 0.273 | 0.28  | 0.286 | 0.291 | 0.295 | 0.301 | 0.306 | 0.313 | 0.321 | 0.33  | 0.341 | 0.352 | 0.364 | 0.375 | 0.387 | 0.398 | 0.406 |
| Kwale         | 0.13  | 0.141 | 0.151 | 0.161 | 0.17  | 0.177 | 0.185 | 0.192 | 0.2   | 0.209 | 0.221 | 0.234 | 0.246 | 0.255 | 0.261 | 0.266 | 0.271 | 0.275 | 0.278 | 0.28  | 0.281 | 0.283 | 0.285 | 0.289 | 0.294 | 0.3   | 0.306 | 0.314 | 0.324 | 0.334 | 0.346 | 0.357 | 0.369 | 0.381 | 0.393 | 0.404 | 0.412 |
| Lamu          | 0.168 | 0.181 | 0.193 | 0.205 | 0.215 | 0.224 | 0.233 | 0.241 | 0.249 | 0.255 | 0.262 | 0.269 | 0.276 | 0.283 | 0.292 | 0.3   | 0.309 | 0.317 | 0.325 | 0.332 | 0.338 | 0.344 | 0.349 | 0.355 | 0.36  | 0.365 | 0.371 | 0.376 | 0.381 | 0.388 | 0.397 | 0.406 | 0.415 | 0.425 | 0.434 | 0.444 | 0.45  |
| Mombasa       | 0.246 | 0.259 | 0.271 | 0.283 | 0.294 | 0.305 | 0.316 | 0.326 | 0.337 | 0.347 | 0.36  | 0.372 | 0.384 | 0.394 | 0.404 | 0.413 | 0.421 | 0.429 | 0.435 | 0.44  | 0.444 | 0.448 | 0.452 | 0.457 | 0.463 | 0.47  | 0.477 | 0.484 | 0.491 | 0.499 | 0.508 | 0.518 | 0.529 | 0.539 | 0.549 | 0.56  | 0.568 |
| TaitaTaveta   | 0.156 | 0.172 | 0.186 | 0.2   | 0.212 | 0.223 | 0.233 | 0.242 | 0.252 | 0.263 | 0.276 | 0.29  | 0.303 | 0.315 | 0.327 | 0.339 | 0.349 | 0.359 | 0.367 | 0.374 | 0.38  | 0.386 | 0.392 | 0.399 | 0.408 | 0.417 | 0.426 | 0.435 | 0.444 | 0.453 | 0.464 | 0.474 | 0.484 | 0.494 | 0.504 | 0.513 | 0.52  |
| TanaRiver     | 0.064 | 0.065 | 0.066 | 0.077 | 0.084 | 0.088 | 0.09  | 0.092 | 0.097 | 0.107 | 0.12  | 0.132 | 0.145 | 0.157 | 0.167 | 0.176 | 0.183 | 0.188 | 0.189 | 0.187 | 0.185 | 0.182 | 0.179 | 0.175 | 0.172 | 0.169 | 0.168 | 0.171 | 0.178 | 0.191 | 0.204 | 0.219 | 0.234 | 0.248 | 0.261 | 0.271 |       |
| Embu          | 0.237 | 0.25  | 0.262 | 0.274 | 0.287 | 0.298 | 0.31  | 0.32  | 0.331 | 0.342 | 0.353 | 0.365 | 0.375 | 0.386 | 0.396 | 0.407 | 0.417 | 0.426 | 0.434 | 0.441 | 0.449 | 0.456 | 0.463 | 0.469 | 0.474 | 0.48  | 0.486 | 0.493 | 0.499 | 0.506 | 0.514 | 0.521 | 0.529 | 0.536 | 0.543 | 0.55  | 0.555 |
| Isiolo        | 0.205 | 0.212 | 0.219 | 0.226 | 0.233 | 0.24  | 0.246 | 0.252 | 0.258 | 0.264 | 0.27  | 0.277 | 0.284 | 0.289 | 0.295 | 0.3   | 0.306 | 0.311 | 0.315 | 0.32  | 0.325 | 0.33  | 0.334 | 0.336 | 0.336 | 0.335 | 0.334 | 0.334 | 0.336 | 0.339 | 0.343 | 0.348 | 0.354 | 0.36  | 0.366 | 0.372 | 0.377 |
| Kitui         | 0.145 | 0.158 | 0.171 | 0.183 | 0.195 | 0.207 | 0.217 | 0.227 | 0.237 | 0.246 | 0.255 | 0.265 | 0.274 | 0.283 | 0.293 | 0.302 | 0.311 | 0.319 | 0.327 | 0.333 | 0.339 | 0.345 | 0.351 |       |       |       |       |       |       |       |       |       |       |       |       |       |       |



Appendix Table 11: Socio-Demographic Index values for all estimated GBD 2016 locations, 1980–2016

| Location                    | 1980  | 1981  | 1982  | 1983  | 1984  | 1985  | 1986  | 1987  | 1988  | 1989  | 1990  | 1991  | 1992  | 1993  | 1994  | 1995  | 1996  | 1997  | 1998  | 1999  | 2000  | 2001  | 2002  | 2003  | 2004  | 2005  | 2006  | 2007  | 2008  | 2009  | 2010  | 2011  | 2012  | 2013  | 2014  | 2015  | 2016  |
|-----------------------------|-------|-------|-------|-------|-------|-------|-------|-------|-------|-------|-------|-------|-------|-------|-------|-------|-------|-------|-------|-------|-------|-------|-------|-------|-------|-------|-------|-------|-------|-------|-------|-------|-------|-------|-------|-------|-------|
| TransNzoia                  | 0.103 | 0.137 | 0.161 | 0.18  | 0.197 | 0.21  | 0.222 | 0.234 | 0.246 | 0.26  | 0.278 | 0.296 | 0.313 | 0.328 | 0.341 | 0.353 | 0.364 | 0.374 | 0.382 | 0.39  | 0.398 | 0.405 | 0.412 | 0.418 | 0.422 | 0.427 | 0.432 | 0.438 | 0.445 | 0.453 | 0.462 | 0.471 | 0.48  | 0.489 | 0.498 | 0.506 | 0.513 |
| Turkana                     | 0.185 | 0.19  | 0.195 | 0.2   | 0.205 | 0.209 | 0.213 | 0.217 | 0.22  | 0.223 | 0.227 | 0.231 | 0.235 | 0.238 | 0.241 | 0.244 | 0.247 | 0.249 | 0.251 | 0.25  | 0.249 | 0.248 | 0.248 | 0.249 | 0.251 | 0.253 | 0.256 | 0.26  | 0.265 | 0.268 | 0.271 | 0.273 | 0.276 | 0.279 | 0.283 | 0.287 | 0.289 |
| UasinGishu                  | 0.183 | 0.202 | 0.22  | 0.237 | 0.252 | 0.266 | 0.279 | 0.291 | 0.303 | 0.316 | 0.329 | 0.342 | 0.355 | 0.366 | 0.376 | 0.386 | 0.395 | 0.404 | 0.413 | 0.422 | 0.432 | 0.443 | 0.453 | 0.462 | 0.47  | 0.478 | 0.486 | 0.495 | 0.504 | 0.513 | 0.522 | 0.53  | 0.539 | 0.548 | 0.556 | 0.564 | 0.57  |
| WestPokot                   | 0.153 | 0.16  | 0.168 | 0.176 | 0.183 | 0.19  | 0.196 | 0.203 | 0.211 | 0.219 | 0.23  | 0.24  | 0.25  | 0.258 | 0.264 | 0.27  | 0.275 | 0.279 | 0.28  | 0.281 | 0.283 | 0.284 | 0.286 | 0.289 | 0.292 | 0.296 | 0.301 | 0.308 | 0.314 | 0.321 | 0.328 | 0.335 | 0.343 | 0.351 | 0.359 | 0.367 | 0.373 |
| Bungoma                     | 0.199 | 0.214 | 0.228 | 0.242 | 0.254 | 0.266 | 0.277 | 0.287 | 0.296 | 0.305 | 0.316 | 0.327 | 0.336 | 0.345 | 0.354 | 0.362 | 0.37  | 0.378 | 0.385 | 0.392 | 0.399 | 0.406 | 0.413 | 0.42  | 0.426 | 0.432 | 0.438 | 0.444 | 0.45  | 0.456 | 0.462 | 0.464 | 0.477 | 0.484 | 0.492 | 0.499 | 0.505 |
| Busia                       | 0.235 | 0.246 | 0.256 | 0.266 | 0.276 | 0.285 | 0.294 | 0.303 | 0.312 | 0.321 | 0.331 | 0.341 | 0.35  | 0.359 | 0.365 | 0.371 | 0.377 | 0.382 | 0.385 | 0.387 | 0.39  | 0.393 | 0.396 | 0.399 | 0.402 | 0.406 | 0.41  | 0.415 | 0.421 | 0.427 | 0.433 | 0.44  | 0.447 | 0.454 | 0.461 | 0.468 | 0.473 |
| Kakamega                    | 0.23  | 0.241 | 0.252 | 0.263 | 0.273 | 0.283 | 0.292 | 0.302 | 0.311 | 0.321 | 0.332 | 0.344 | 0.355 | 0.365 | 0.374 | 0.383 | 0.39  | 0.397 | 0.402 | 0.405 | 0.408 | 0.411 | 0.414 | 0.417 | 0.421 | 0.426 | 0.431 | 0.438 | 0.444 | 0.45  | 0.457 | 0.463 | 0.47  | 0.477 | 0.484 | 0.491 | 0.496 |
| Vihiga                      | 0.258 | 0.27  | 0.281 | 0.293 | 0.304 | 0.315 | 0.325 | 0.334 | 0.344 | 0.352 | 0.361 | 0.37  | 0.378 | 0.385 | 0.391 | 0.397 | 0.401 | 0.405 | 0.408 | 0.409 | 0.41  | 0.412 | 0.415 | 0.418 | 0.422 | 0.428 | 0.436 | 0.446 | 0.456 | 0.467 | 0.476 | 0.485 | 0.493 | 0.5   | 0.507 | 0.513 | 0.517 |
| Southern Sub-Saharan Africa | 0.505 | 0.511 | 0.516 | 0.521 | 0.527 | 0.531 | 0.536 | 0.541 | 0.546 | 0.552 | 0.558 | 0.564 | 0.57  | 0.577 | 0.583 | 0.589 | 0.595 | 0.601 | 0.606 | 0.611 | 0.615 | 0.62  | 0.625 | 0.63  | 0.635 | 0.64  | 0.646 | 0.651 | 0.656 | 0.661 | 0.666 | 0.672 | 0.677 | 0.681 | 0.685 | 0.689 | 0.691 |
| Botswana                    | 0.404 | 0.414 | 0.423 | 0.432 | 0.441 | 0.451 | 0.461 | 0.471 | 0.484 | 0.497 | 0.508 | 0.518 | 0.527 | 0.536 | 0.544 | 0.552 | 0.56  | 0.569 | 0.578 | 0.587 | 0.595 | 0.602 | 0.609 | 0.616 | 0.623 | 0.631 | 0.638 | 0.645 | 0.65  | 0.656 | 0.662 | 0.669 | 0.675 | 0.682 | 0.689 | 0.695 | 0.701 |
| Lesotho                     | 0.323 | 0.328 | 0.333 | 0.337 | 0.341 | 0.345 | 0.349 | 0.353 | 0.358 | 0.364 | 0.37  | 0.376 | 0.383 | 0.39  | 0.397 | 0.403 | 0.41  | 0.417 | 0.423 | 0.429 | 0.435 | 0.442 | 0.448 | 0.455 | 0.462 | 0.469 | 0.475 | 0.482 | 0.489 | 0.496 | 0.504 | 0.513 | 0.521 | 0.529 | 0.538 | 0.545 | 0.552 |
| Namibia                     | 0.374 | 0.38  | 0.385 | 0.39  | 0.395 | 0.399 | 0.404 | 0.41  | 0.416 | 0.422 | 0.427 | 0.433 | 0.441 | 0.45  | 0.459 | 0.469 | 0.478 | 0.488 | 0.497 | 0.505 | 0.514 | 0.522 | 0.531 | 0.539 | 0.547 | 0.555 | 0.563 | 0.569 | 0.575 | 0.58  | 0.586 | 0.591 | 0.597 | 0.604 | 0.611 | 0.618 | 0.624 |
| South Africa                | 0.542 | 0.548 | 0.554 | 0.559 | 0.564 | 0.569 | 0.574 | 0.579 | 0.584 | 0.59  | 0.596 | 0.601 | 0.606 | 0.613 | 0.619 | 0.624 | 0.63  | 0.636 | 0.64  | 0.645 | 0.649 | 0.653 | 0.658 | 0.663 | 0.669 | 0.675 | 0.682 | 0.688 | 0.695 | 0.701 | 0.707 | 0.714 | 0.719 | 0.724 | 0.727 | 0.73  | 0.734 |
| Swaziland                   | 0.384 | 0.391 | 0.398 | 0.404 | 0.41  | 0.415 | 0.421 | 0.429 | 0.437 | 0.446 | 0.454 | 0.462 | 0.47  | 0.477 | 0.484 | 0.491 | 0.498 | 0.504 | 0.509 | 0.514 | 0.518 | 0.522 | 0.525 | 0.528 | 0.531 | 0.534 | 0.537 | 0.538 | 0.538 | 0.539 | 0.544 | 0.553 | 0.562 | 0.571 | 0.578 | 0.584 | 0.589 |
| Zimbabwe                    | 0.357 | 0.364 | 0.37  | 0.377 | 0.384 | 0.39  | 0.397 | 0.403 | 0.412 | 0.422 | 0.432 | 0.443 | 0.452 | 0.461 | 0.47  | 0.477 | 0.486 | 0.493 | 0.498 | 0.502 | 0.505 | 0.507 | 0.508 | 0.506 | 0.503 | 0.498 | 0.492 | 0.485 | 0.477 | 0.472 | 0.469 | 0.47  | 0.474 | 0.479 | 0.485 | 0.491 | 0.497 |
| Eastern Cape                | 0.495 | 0.501 | 0.506 | 0.511 | 0.516 | 0.521 | 0.524 | 0.528 | 0.533 | 0.538 | 0.543 | 0.547 | 0.551 | 0.557 | 0.562 | 0.567 | 0.573 | 0.578 | 0.583 | 0.587 | 0.591 | 0.596 | 0.601 | 0.606 | 0.612 | 0.618 | 0.626 | 0.633 | 0.64  | 0.647 | 0.653 | 0.66  | 0.665 | 0.67  | 0.673 | 0.676 | 0.679 |
| Free State                  | 0.546 | 0.551 | 0.556 | 0.56  | 0.564 | 0.568 | 0.572 | 0.576 | 0.581 | 0.586 | 0.591 | 0.597 | 0.602 | 0.609 | 0.617 | 0.624 | 0.631 | 0.637 | 0.641 | 0.645 | 0.649 | 0.652 | 0.656 | 0.661 | 0.666 | 0.672 | 0.678 | 0.684 | 0.69  | 0.696 | 0.702 | 0.708 | 0.714 | 0.718 | 0.721 | 0.724 | 0.727 |
| Gauteng                     | 0.656 | 0.66  | 0.664 | 0.667 | 0.671 | 0.674 | 0.677 | 0.681 | 0.684 | 0.688 | 0.692 | 0.695 | 0.698 | 0.702 | 0.705 | 0.707 | 0.709 | 0.712 | 0.715 | 0.718 | 0.721 | 0.724 | 0.728 | 0.731 | 0.735 | 0.74  | 0.744 | 0.749 | 0.754 | 0.759 | 0.763 | 0.768 | 0.773 | 0.775 | 0.778 | 0.78  | 0.782 |
| KwaZulu-Natal               | 0.521 | 0.527 | 0.532 | 0.537 | 0.542 | 0.546 | 0.551 | 0.555 | 0.56  | 0.566 | 0.571 | 0.576 | 0.581 | 0.588 | 0.594 | 0.599 | 0.605 | 0.61  | 0.615 | 0.619 | 0.624 | 0.629 | 0.634 | 0.639 | 0.645 | 0.651 | 0.658 | 0.665 | 0.672 | 0.679 | 0.685 | 0.692 | 0.702 | 0.706 | 0.71  | 0.713 |       |
| Limpopo                     | 0.447 | 0.454 | 0.461 | 0.467 | 0.473 | 0.479 | 0.484 | 0.49  | 0.497 | 0.504 | 0.511 | 0.518 | 0.524 | 0.532 | 0.54  | 0.547 | 0.554 | 0.562 | 0.568 | 0.572 | 0.577 | 0.582 | 0.588 | 0.594 | 0.602 | 0.61  | 0.618 | 0.627 | 0.636 | 0.643 | 0.651 | 0.659 | 0.665 | 0.671 | 0.675 | 0.679 | 0.682 |
| Mpumalanga                  | 0.495 | 0.502 | 0.508 | 0.514 | 0.52  | 0.525 | 0.531 | 0.537 | 0.543 | 0.55  | 0.557 | 0.563 | 0.57  | 0.577 | 0.584 | 0.589 | 0.595 | 0.601 | 0.606 | 0.61  | 0.615 | 0.62  | 0.625 | 0.631 | 0.637 | 0.644 | 0.652 | 0.659 | 0.667 | 0.674 | 0.681 | 0.688 | 0.695 | 0.7   | 0.703 | 0.707 | 0.71  |
| North-West                  | 0.523 | 0.529 | 0.534 | 0.539 | 0.545 | 0.55  | 0.555 | 0.56  | 0.565 | 0.571 | 0.576 | 0.58  | 0.585 | 0.59  | 0.594 | 0.597 | 0.6   | 0.604 | 0.608 | 0.613 | 0.618 | 0.623 | 0.628 | 0.633 | 0.639 | 0.645 | 0.651 | 0.658 | 0.664 | 0.671 | 0.677 | 0.683 | 0.689 | 0.693 | 0.696 | 0.699 | 0.702 |
| Northern Cape               | 0.545 | 0.55  | 0.555 | 0.559 | 0.564 | 0.568 | 0.572 | 0.576 | 0.58  | 0.585 | 0.59  | 0.594 | 0.598 | 0.603 | 0.607 | 0.61  | 0.614 | 0.619 | 0.623 | 0.626 | 0.63  | 0.633 | 0.637 | 0.641 | 0.646 | 0.652 | 0.658 | 0.664 | 0.67  | 0.675 | 0.681 | 0.688 | 0.693 | 0.697 | 0.7   | 0.704 | 0.707 |
| Western Cape                | 0.653 | 0.657 | 0.66  | 0.662 | 0.665 | 0.668 | 0.67  | 0.672 | 0.675 | 0.678 | 0.681 | 0.684 | 0.687 | 0.691 | 0.695 | 0.698 | 0.703 | 0.708 | 0.711 | 0.713 | 0.715 | 0.717 | 0.72  | 0.722 | 0.725 | 0.728 | 0.732 | 0.736 | 0.74  | 0.744 | 0.748 | 0.752 | 0.756 | 0.758 | 0.76  | 0.762 | 0.764 |
| Western Sub-Saharan Africa  | 0.254 | 0.259 | 0.263 | 0.268 | 0.272 | 0.276 | 0.279 | 0.281 | 0.282 | 0.285 | 0.287 | 0.29  | 0.293 | 0.297 | 0.301 | 0.305 | 0.31  | 0.314 | 0.318 | 0.322 | 0.326 | 0.33  | 0.335 | 0.339 | 0.345 | 0.351 | 0.357 | 0.364 | 0.37  | 0.376 | 0.383 | 0.391 | 0.399 | 0.407 | 0.415 | 0.423 | 0.428 |
| Benin                       | 0.171 | 0.175 | 0.178 | 0.182 | 0.187 | 0.192 | 0.197 | 0.202 | 0.207 | 0.212 | 0.217 | 0.222 | 0.227 | 0.233 | 0.237 | 0.242 | 0.247 | 0.252 | 0.257 | 0.262 | 0.267 | 0.273 | 0.278 | 0.283 | 0.288 | 0.293 | 0.298 | 0.304 | 0.31  | 0.315 | 0.32  | 0.326 | 0.33  | 0.335 | 0.34  | 0.346 | 0.351 |
| Burkina Faso                | 0.103 | 0.106 | 0.108 | 0.109 | 0.111 | 0.113 | 0.115 | 0.117 | 0.12  | 0.123 | 0.125 | 0.13  | 0.136 | 0.141 | 0.146 | 0.15  | 0.155 | 0.16  | 0.165 | 0.169 | 0.173 | 0.178 | 0.182 | 0.186 | 0.191 | 0.195 | 0.2   | 0.206 | 0.212 | 0.217 | 0.225 | 0.234 | 0.244 | 0.253 | 0.262 | 0.269 | 0.274 |
| Cameroon                    | 0.283 | 0.289 | 0.296 | 0.302 | 0.309 | 0.316 | 0.322 | 0.327 | 0.332 | 0.337 | 0.341 | 0.345 | 0.349 | 0.353 | 0.356 | 0.36  | 0.364 | 0.369 | 0.374 | 0.379 | 0.383 | 0.388 | 0.392 | 0.396 | 0.4   | 0.403 | 0.406 | 0.409 | 0.412 | 0.415 | 0.419 | 0.423 | 0.428 | 0.433 | 0.439 | 0.445 | 0.451 |
| Cape Verde                  | 0.241 | 0.248 | 0.256 | 0.263 | 0.271 | 0.279 | 0.287 | 0.294 | 0.302 | 0.31  | 0.317 | 0.325 | 0.332 | 0.34  | 0.349 | 0.358 | 0.367 | 0.377 | 0.387 | 0.399 | 0.41  | 0.421 | 0.431 | 0.442 | 0.452 | 0.462 | 0.473 | 0.484 | 0.495 | 0.505 | 0.514 | 0.524 | 0.534 | 0.542 | 0.551 | 0.559 | 0.566 |
| Chad                        | 0.158 | 0.159 | 0.159 | 0.161 | 0.163 | 0.166 | 0.169 | 0.172 | 0.175 | 0.179 | 0.183 | 0.187 | 0.191 | 0.194 | 0.197 | 0.2   | 0.203 | 0.206 | 0.209 | 0.212 | 0.214 | 0.217 | 0.219 | 0.222 | 0.228 | 0.235 | 0.241 | 0.247 | 0.252 | 0.257 | 0.262 | 0.268 | 0.274 | 0.28  | 0.285 | 0.29  | 0.295 |
| Cote d'Ivoire               | 0.225 | 0.226 | 0.227 | 0.228 | 0.23  | 0.234 | 0.241 | 0.249 | 0.258 | 0.267 | 0.277 | 0.287 | 0.297 | 0.306 | 0.313 | 0.32  | 0.327 | 0.332 | 0.337 | 0.341 | 0.345 | 0.348 | 0.351 | 0.353 | 0.355 | 0.358 | 0.36  | 0.363 | 0.366 | 0.369 | 0.373 | 0.377 | 0.382 | 0.388 | 0.394 | 0.401 | 0.407 |
| The Gambia                  | 0.205 | 0.21  | 0.215 | 0.221 | 0.226 | 0.232 | 0.237 | 0.242 | 0.247 | 0.251 | 0.254 | 0.255 | 0.255 | 0.254 | 0.254 | 0.255 | 0.259 | 0.264 | 0.269 |       |       |       |       |       |       |       |       |       |       |       |       |       |       |       |       |       |       |



**Table 12. The probability of death from birth to 20 years in the United States, 50 states, and DC from 1990 to 2016**

| <b>Location</b>      | <b>1990, 20q0</b> | <b>2016, 20q0</b> |
|----------------------|-------------------|-------------------|
| Alabama              | 2.18              | 1.54              |
| Alaska               | 2.09              | 1.21              |
| Arizona              | 1.81              | 1.10              |
| Arkansas             | 2.08              | 1.41              |
| California           | 1.62              | 0.80              |
| Colorado             | 1.61              | 0.97              |
| Connecticut          | 1.44              | 0.80              |
| Delaware             | 1.82              | 1.18              |
| District of Columbia | 3.70              | 1.14              |
| Florida              | 1.86              | 1.10              |
| Georgia              | 2.10              | 1.22              |
| Hawaii               | 1.35              | 0.91              |
| Idaho                | 1.79              | 1.05              |
| Illinois             | 1.92              | 1.08              |
| Indiana              | 1.79              | 1.24              |
| Iowa                 | 1.53              | 0.89              |
| Kansas               | 1.70              | 1.16              |
| Kentucky             | 1.76              | 1.21              |
| Louisiana            | 2.13              | 1.52              |
| Maine                | 1.41              | 1.09              |
| Maryland             | 1.82              | 1.07              |
| Massachusetts        | 1.27              | 0.72              |
| Michigan             | 1.92              | 1.14              |
| Minnesota            | 1.41              | 0.89              |
| Mississippi          | 2.36              | 1.63              |
| Missouri             | 1.88              | 1.19              |
| Montana              | 1.83              | 1.16              |

|                |      |      |
|----------------|------|------|
| Nebraska       | 1.67 | 1.02 |
| Nevada         | 1.79 | 1.00 |
| New Hampshire  | 1.33 | 0.80 |
| New Jersey     | 1.54 | 0.79 |
| New Mexico     | 1.97 | 1.17 |
| New York       | 1.70 | 0.81 |
| North Carolina | 1.95 | 1.21 |
| North Dakota   | 1.59 | 1.05 |
| Ohio           | 1.71 | 1.16 |
| Oklahoma       | 1.87 | 1.45 |
| Oregon         | 1.62 | 0.91 |
| Pennsylvania   | 1.67 | 1.04 |
| Rhode Island   | 1.34 | 0.87 |
| South Carolina | 2.10 | 1.25 |
| South Dakota   | 2.01 | 1.32 |
| Tennessee      | 1.92 | 1.27 |
| Texas          | 1.71 | 1.07 |
| United States  | 1.76 | 1.05 |
| Utah           | 1.46 | 1.00 |
| Vermont        | 1.39 | 0.84 |
| Virginia       | 1.78 | 1.03 |
| Washington     | 1.56 | 0.84 |
| West Virginia  | 1.77 | 1.37 |
| Wisconsin      | 1.60 | 1.01 |
| Wyoming        | 1.76 | 1.20 |

**Table 13. The probability of death from 20 to 55 years in the United States, 50 states, and DC from 1990 to 2016**

| <b>Location</b>      | <b>1990, 35q20</b> | <b>2016, 35q20</b> |
|----------------------|--------------------|--------------------|
| Alabama              | 9.96               | 10.21              |
| Alaska               | 8.11               | 8.32               |
| Arizona              | 8                  | 7.42               |
| Arkansas             | 9.26               | 9.86               |
| California           | 7.64               | 5.52               |
| Colorado             | 6.37               | 6.16               |
| Connecticut          | 6.57               | 5.61               |
| Delaware             | 7.77               | 7.6                |
| District of Columbia | 20.1               | 8.38               |
| Florida              | 8.51               | 7.09               |
| Georgia              | 9.35               | 7.7                |
| Hawaii               | 6.46               | 6.13               |
| Idaho                | 6.57               | 6.68               |
| Illinois             | 8.35               | 6.36               |
| Indiana              | 7.44               | 8.15               |
| Iowa                 | 6.15               | 6.23               |
| Kansas               | 6.62               | 7.08               |
| Kentucky             | 8.68               | 9.92               |
| Louisiana            | 10.13              | 9.85               |
| Maine                | 6.65               | 6.71               |
| Maryland             | 7.97               | 6.61               |
| Massachusetts        | 6.66               | 5.85               |
| Michigan             | 8.06               | 7.67               |
| Minnesota            | 5.77               | 5.2                |
| Mississippi          | 10.61              | 10.82              |
| Missouri             | 7.9                | 8.29               |
| Montana              | 7.37               | 7.58               |

|                |       |       |
|----------------|-------|-------|
| Nebraska       | 6.47  | 6.27  |
| Nevada         | 8.98  | 7.51  |
| New Hampshire  | 6.17  | 6.1   |
| New Jersey     | 7.43  | 5.82  |
| New Mexico     | 8.48  | 9.86  |
| New York       | 8.66  | 5.52  |
| North Carolina | 8.84  | 7.54  |
| North Dakota   | 6.26  | 6.82  |
| Ohio           | 7.53  | 8.08  |
| Oklahoma       | 8.31  | 9.93  |
| Oregon         | 6.92  | 6.38  |
| Pennsylvania   | 7.74  | 7.26  |
| Rhode Island   | 6.84  | 6.38  |
| South Carolina | 10.08 | 9     |
| South Dakota   | 6.91  | 7.48  |
| Tennessee      | 9     | 9.53  |
| Texas          | 8.2   | 6.9   |
| United States  | 7.96  | 6.99  |
| Utah           | 6.05  | 6.45  |
| Vermont        | 6.54  | 6.07  |
| Virginia       | 7.4   | 6.27  |
| Washington     | 6.62  | 5.82  |
| West Virginia  | 8.81  | 10.92 |
| Wisconsin      | 6.31  | 6.23  |
| Wyoming        | 7.38  | 8.22  |
| Wyoming        | 1.76  | 1.20  |

**Table 14. The probability of death from 55 to 90 years in the United States, 50 states, and DC from 1990 to 2016**

| <b>Location</b>      | <b>1990, 35q55</b> | <b>2016, 35q55</b> |
|----------------------|--------------------|--------------------|
| Alabama              | 83.32              | 79.59              |
| Alaska               | 81.69              | 73.71              |
| Arizona              | 78.56              | 68.65              |
| Arkansas             | 82.54              | 78.52              |
| California           | 80.07              | 67.44              |
| Colorado             | 79.01              | 70.29              |
| Connecticut          | 78.66              | 69.08              |
| Delaware             | 82.97              | 72.52              |
| District of Columbia | 83.26              | 71.18              |
| Florida              | 76.96              | 67.63              |
| Georgia              | 83.43              | 77.12              |
| Hawaii               | 73.76              | 63.27              |
| Idaho                | 79.03              | 73.88              |
| Illinois             | 82.01              | 73.09              |
| Indiana              | 82.51              | 77.01              |
| Iowa                 | 78.6               | 72.89              |
| Kansas               | 78.96              | 74.14              |
| Kentucky             | 83.83              | 79.43              |
| Louisiana            | 83.92              | 78.71              |
| Maine                | 81.42              | 74.06              |
| Maryland             | 83.11              | 71.42              |
| Massachusetts        | 80.1               | 70.92              |
| Michigan             | 81.9               | 75.21              |
| Minnesota            | 78.22              | 70.15              |
| Mississippi          | 83.75              | 80.21              |
| Missouri             | 81.35              | 75.55              |
| Montana              | 79.73              | 72.61              |

|                |       |       |
|----------------|-------|-------|
| Nebraska       | 79.17 | 72.94 |
| Nevada         | 83.43 | 74.81 |
| New Hampshire  | 81.17 | 72.07 |
| New Jersey     | 81.93 | 70.99 |
| New Mexico     | 79.12 | 71.25 |
| New York       | 81.18 | 69.25 |
| North Carolina | 81.98 | 75.18 |
| North Dakota   | 77.17 | 69.68 |
| Ohio           | 82.61 | 76.21 |
| Oklahoma       | 82.27 | 78.44 |
| Oregon         | 80.71 | 72.18 |
| Pennsylvania   | 82.33 | 74.1  |
| Rhode Island   | 80.47 | 71.97 |
| South Carolina | 82.92 | 76.81 |
| South Dakota   | 77.84 | 70.65 |
| Tennessee      | 83.38 | 78.41 |
| Texas          | 81.3  | 74.21 |
| United States  | 81.1  | 72.77 |
| Utah           | 78.58 | 73.46 |
| Vermont        | 81.2  | 72.25 |
| Virginia       | 82.53 | 73.61 |
| Washington     | 79.54 | 70.9  |
| West Virginia  | 84.03 | 79.69 |
| Wisconsin      | 80.08 | 73.1  |
| Wyoming        | 80.08 | 72.33 |
| Wyoming        | 7.38  | 8.22  |
| Wyoming        | 1.76  | 1.20  |

Table 15. Probability of Death between 20 and 50 years from 1990 to 2016 for GBD locations, including the United States, DC and 50 states

| Location                  | Year | Age   | Sex  | Cause of death or injury | Measure              | Value  |
|---------------------------|------|-------|------|--------------------------|----------------------|--------|
| Lesotho                   | 2016 | 20-55 | Both | All causes               | Probability of death | 50.09% |
| Central African Republic  | 2016 | 20-55 | Both | All causes               | Probability of death | 38.55% |
| Swaziland                 | 2016 | 20-55 | Both | All causes               | Probability of death | 37.05% |
| Zimbabwe                  | 2016 | 20-55 | Both | All causes               | Probability of death | 29.90% |
| Zambia                    | 2016 | 20-55 | Both | All causes               | Probability of death | 29.84% |
| South Africa              | 2016 | 20-55 | Both | All causes               | Probability of death | 29.11% |
| Afghanistan               | 2016 | 20-55 | Both | All causes               | Probability of death | 27.62% |
| Guinea-Bissau             | 2016 | 20-55 | Both | All causes               | Probability of death | 27.09% |
| Botswana                  | 2016 | 20-55 | Both | All causes               | Probability of death | 27.00% |
| Malawi                    | 2016 | 20-55 | Both | All causes               | Probability of death | 26.56% |
| Mozambique                | 2016 | 20-55 | Both | All causes               | Probability of death | 26.35% |
| Somalia                   | 2016 | 20-55 | Both | All causes               | Probability of death | 25.63% |
| Namibia                   | 2016 | 20-55 | Both | All causes               | Probability of death | 24.77% |
| Papua New Guinea          | 2016 | 20-55 | Both | All causes               | Probability of death | 24.61% |
| Solomon Islands           | 2016 | 20-55 | Both | All causes               | Probability of death | 23.98% |
| Cameroon                  | 2016 | 20-55 | Both | All causes               | Probability of death | 23.87% |
| Cote d'Ivoire             | 2016 | 20-55 | Both | All causes               | Probability of death | 23.46% |
| Kiribati                  | 2016 | 20-55 | Both | All causes               | Probability of death | 23.36% |
| South Sudan               | 2016 | 20-55 | Both | All causes               | Probability of death | 22.61% |
| Uganda                    | 2016 | 20-55 | Both | All causes               | Probability of death | 22.26% |
| Congo                     | 2016 | 20-55 | Both | All causes               | Probability of death | 22.25% |
| Burundi                   | 2016 | 20-55 | Both | All causes               | Probability of death | 21.70% |
| Vanuatu                   | 2016 | 20-55 | Both | All causes               | Probability of death | 21.39% |
| Marshall Islands          | 2016 | 20-55 | Both | All causes               | Probability of death | 21.34% |
| Federated States of Micr  | 2016 | 20-55 | Both | All causes               | Probability of death | 20.95% |
| Togo                      | 2016 | 20-55 | Both | All causes               | Probability of death | 20.46% |
| Chad                      | 2016 | 20-55 | Both | All causes               | Probability of death | 20.33% |
| Equatorial Guinea         | 2016 | 20-55 | Both | All causes               | Probability of death | 19.99% |
| Democratic Republic of tl | 2016 | 20-55 | Both | All causes               | Probability of death | 19.94% |
| Sierra Leone              | 2016 | 20-55 | Both | All causes               | Probability of death | 19.79% |
| Tanzania                  | 2016 | 20-55 | Both | All causes               | Probability of death | 19.75% |
| Eritrea                   | 2016 | 20-55 | Both | All causes               | Probability of death | 19.61% |
| Guinea                    | 2016 | 20-55 | Both | All causes               | Probability of death | 19.51% |
| Haiti                     | 2016 | 20-55 | Both | All causes               | Probability of death | 19.16% |
| Angola                    | 2016 | 20-55 | Both | All causes               | Probability of death | 18.33% |
| Kenya                     | 2016 | 20-55 | Both | All causes               | Probability of death | 17.70% |
| Madagascar                | 2016 | 20-55 | Both | All causes               | Probability of death | 17.62% |
| Gabon                     | 2016 | 20-55 | Both | All causes               | Probability of death | 17.61% |
| Ethiopia                  | 2016 | 20-55 | Both | All causes               | Probability of death | 17.41% |
| Fiji                      | 2016 | 20-55 | Both | All causes               | Probability of death | 17.26% |
| Burkina Faso              | 2016 | 20-55 | Both | All causes               | Probability of death | 17.25% |
| Liberia                   | 2016 | 20-55 | Both | All causes               | Probability of death | 17.14% |
| Syria                     | 2016 | 20-55 | Both | All causes               | Probability of death | 17.10% |
| Mongolia                  | 2016 | 20-55 | Both | All causes               | Probability of death | 17.00% |

|                           |            |      |            |                      |        |
|---------------------------|------------|------|------------|----------------------|--------|
| Djibouti                  | 2016 20-55 | Both | All causes | Probability of death | 16.99% |
| Guyana                    | 2016 20-55 | Both | All causes | Probability of death | 16.73% |
| Ghana                     | 2016 20-55 | Both | All causes | Probability of death | 16.68% |
| Niger                     | 2016 20-55 | Both | All causes | Probability of death | 16.34% |
| Russian Federation        | 2016 20-55 | Both | All causes | Probability of death | 16.23% |
| Benin                     | 2016 20-55 | Both | All causes | Probability of death | 16.15% |
| Iraq                      | 2016 20-55 | Both | All causes | Probability of death | 15.92% |
| Senegal                   | 2016 20-55 | Both | All causes | Probability of death | 15.88% |
| Mali                      | 2016 20-55 | Both | All causes | Probability of death | 15.72% |
| Yemen                     | 2016 20-55 | Both | All causes | Probability of death | 15.69% |
| The Gambia                | 2016 20-55 | Both | All causes | Probability of death | 15.46% |
| Rwanda                    | 2016 20-55 | Both | All causes | Probability of death | 14.04% |
| Cambodia                  | 2016 20-55 | Both | All causes | Probability of death | 13.95% |
| Nigeria                   | 2016 20-55 | Both | All causes | Probability of death | 13.93% |
| Ukraine                   | 2016 20-55 | Both | All causes | Probability of death | 13.62% |
| Tonga                     | 2016 20-55 | Both | All causes | Probability of death | 13.28% |
| Laos                      | 2016 20-55 | Both | All causes | Probability of death | 13.16% |
| India                     | 2016 20-55 | Both | All causes | Probability of death | 13.13% |
| Comoros                   | 2016 20-55 | Both | All causes | Probability of death | 13.08% |
| Kazakhstan                | 2016 20-55 | Both | All causes | Probability of death | 12.89% |
| Pakistan                  | 2016 20-55 | Both | All causes | Probability of death | 12.82% |
| Guatemala                 | 2016 20-55 | Both | All causes | Probability of death | 12.77% |
| Myanmar                   | 2016 20-55 | Both | All causes | Probability of death | 12.66% |
| Uzbekistan                | 2016 20-55 | Both | All causes | Probability of death | 12.43% |
| Grenada                   | 2016 20-55 | Both | All causes | Probability of death | 12.42% |
| Samoa                     | 2016 20-55 | Both | All causes | Probability of death | 12.36% |
| Philippines               | 2016 20-55 | Both | All causes | Probability of death | 12.15% |
| Saint Vincent and the Gre | 2016 20-55 | Both | All causes | Probability of death | 11.94% |
| Turkmenistan              | 2016 20-55 | Both | All causes | Probability of death | 11.92% |
| The Bahamas               | 2016 20-55 | Both | All causes | Probability of death | 11.88% |
| Belize                    | 2016 20-55 | Both | All causes | Probability of death | 11.86% |
| American Samoa            | 2016 20-55 | Both | All causes | Probability of death | 11.84% |
| Sudan                     | 2016 20-55 | Both | All causes | Probability of death | 11.84% |
| Belarus                   | 2016 20-55 | Both | All causes | Probability of death | 11.68% |
| North Korea               | 2016 20-55 | Both | All causes | Probability of death | 11.55% |
| Moldova                   | 2016 20-55 | Both | All causes | Probability of death | 11.54% |
| Sao Tome and Principe     | 2016 20-55 | Both | All causes | Probability of death | 11.46% |
| Guam                      | 2016 20-55 | Both | All causes | Probability of death | 11.37% |
| El Salvador               | 2016 20-55 | Both | All causes | Probability of death | 11.34% |
| Kyrgyzstan                | 2016 20-55 | Both | All causes | Probability of death | 11.29% |
| Lithuania                 | 2016 20-55 | Both | All causes | Probability of death | 11.18% |
| Nepal                     | 2016 20-55 | Both | All causes | Probability of death | 11.01% |
| West Virginia             | 2016 20-55 | Both | All causes | Probability of death | 10.92% |
| Trinidad and Tobago       | 2016 20-55 | Both | All causes | Probability of death | 10.88% |
| Suriname                  | 2016 20-55 | Both | All causes | Probability of death | 10.83% |
| Mississippi               | 2016 20-55 | Both | All causes | Probability of death | 10.82% |
| Greenland                 | 2016 20-55 | Both | All causes | Probability of death | 10.64% |
| Latvia                    | 2016 20-55 | Both | All causes | Probability of death | 10.59% |



|                          |      |       |      |            |                      |        |
|--------------------------|------|-------|------|------------|----------------------|--------|
| Indonesia                | 2016 | 20-55 | Both | All causes | Probability of death | 10.51% |
| Cape Verde               | 2016 | 20-55 | Both | All causes | Probability of death | 10.39% |
| Honduras                 | 2016 | 20-55 | Both | All causes | Probability of death | 10.33% |
| Seychelles               | 2016 | 20-55 | Both | All causes | Probability of death | 10.31% |
| Alabama                  | 2016 | 20-55 | Both | All causes | Probability of death | 10.20% |
| Mauritania               | 2016 | 20-55 | Both | All causes | Probability of death | 10.11% |
| Oklahoma                 | 2016 | 20-55 | Both | All causes | Probability of death | 9.93%  |
| Kentucky                 | 2016 | 20-55 | Both | All causes | Probability of death | 9.91%  |
| Arkansas                 | 2016 | 20-55 | Both | All causes | Probability of death | 9.86%  |
| New Mexico               | 2016 | 20-55 | Both | All causes | Probability of death | 9.86%  |
| Louisiana                | 2016 | 20-55 | Both | All causes | Probability of death | 9.84%  |
| Egypt                    | 2016 | 20-55 | Both | All causes | Probability of death | 9.73%  |
| Dominica                 | 2016 | 20-55 | Both | All causes | Probability of death | 9.71%  |
| Venezuela                | 2016 | 20-55 | Both | All causes | Probability of death | 9.64%  |
| Georgia                  | 2016 | 20-55 | Both | All causes | Probability of death | 9.63%  |
| Virgin Islands, U.S.     | 2016 | 20-55 | Both | All causes | Probability of death | 9.58%  |
| Tennessee                | 2016 | 20-55 | Both | All causes | Probability of death | 9.54%  |
| Tajikistan               | 2016 | 20-55 | Both | All causes | Probability of death | 9.40%  |
| Northern Mariana Islands | 2016 | 20-55 | Both | All causes | Probability of death | 9.40%  |
| Azerbaijan               | 2016 | 20-55 | Both | All causes | Probability of death | 9.35%  |
| Thailand                 | 2016 | 20-55 | Both | All causes | Probability of death | 9.30%  |
| Bangladesh               | 2016 | 20-55 | Both | All causes | Probability of death | 9.24%  |
| Brazil                   | 2016 | 20-55 | Both | All causes | Probability of death | 9.16%  |
| Saint Lucia              | 2016 | 20-55 | Both | All causes | Probability of death | 9.03%  |
| South Carolina           | 2016 | 20-55 | Both | All causes | Probability of death | 9.00%  |
| Mauritius                | 2016 | 20-55 | Both | All causes | Probability of death | 8.99%  |
| Timor-Leste              | 2016 | 20-55 | Both | All causes | Probability of death | 8.85%  |
| Vietnam                  | 2016 | 20-55 | Both | All causes | Probability of death | 8.84%  |
| Bolivia                  | 2016 | 20-55 | Both | All causes | Probability of death | 8.76%  |
| Paraguay                 | 2016 | 20-55 | Both | All causes | Probability of death | 8.70%  |
| United Arab Emirates     | 2016 | 20-55 | Both | All causes | Probability of death | 8.67%  |
| Romania                  | 2016 | 20-55 | Both | All causes | Probability of death | 8.57%  |
| Dominican Republic       | 2016 | 20-55 | Both | All causes | Probability of death | 8.48%  |
| Alaska                   | 2016 | 20-55 | Both | All causes | Probability of death | 8.32%  |
| Mexico                   | 2016 | 20-55 | Both | All causes | Probability of death | 8.29%  |
| Bulgaria                 | 2016 | 20-55 | Both | All causes | Probability of death | 8.28%  |
| Missouri                 | 2016 | 20-55 | Both | All causes | Probability of death | 8.28%  |
| Bhutan                   | 2016 | 20-55 | Both | All causes | Probability of death | 8.28%  |
| Hungary                  | 2016 | 20-55 | Both | All causes | Probability of death | 8.27%  |
| Jamaica                  | 2016 | 20-55 | Both | All causes | Probability of death | 8.23%  |
| Wyoming                  | 2016 | 20-55 | Both | All causes | Probability of death | 8.22%  |
| Indiana                  | 2016 | 20-55 | Both | All causes | Probability of death | 8.15%  |
| Estonia                  | 2016 | 20-55 | Both | All causes | Probability of death | 8.12%  |
| Ohio                     | 2016 | 20-55 | Both | All causes | Probability of death | 8.08%  |
| Libya                    | 2016 | 20-55 | Both | All causes | Probability of death | 8.06%  |
| Barbados                 | 2016 | 20-55 | Both | All causes | Probability of death | 8.00%  |
| Palestine                | 2016 | 20-55 | Both | All causes | Probability of death | 7.93%  |
| Ecuador                  | 2016 | 20-55 | Both | All causes | Probability of death | 7.69%  |

|                     |      |       |      |            |                      |       |
|---------------------|------|-------|------|------------|----------------------|-------|
| Georgia             | 2016 | 20-55 | Both | All causes | Probability of death | 7.69% |
| Michigan            | 2016 | 20-55 | Both | All causes | Probability of death | 7.67% |
| Morocco             | 2016 | 20-55 | Both | All causes | Probability of death | 7.61% |
| Nevada              | 2016 | 20-55 | Both | All causes | Probability of death | 7.61% |
| Delaware            | 2016 | 20-55 | Both | All causes | Probability of death | 7.60% |
| Montana             | 2016 | 20-55 | Both | All causes | Probability of death | 7.58% |
| North Carolina      | 2016 | 20-55 | Both | All causes | Probability of death | 7.54% |
| Sri Lanka           | 2016 | 20-55 | Both | All causes | Probability of death | 7.49% |
| South Dakota        | 2016 | 20-55 | Both | All causes | Probability of death | 7.48% |
| Malaysia            | 2016 | 20-55 | Both | All causes | Probability of death | 7.47% |
| Arizona             | 2016 | 20-55 | Both | All causes | Probability of death | 7.42% |
| Serbia              | 2016 | 20-55 | Both | All causes | Probability of death | 7.40% |
| Puerto Rico         | 2016 | 20-55 | Both | All causes | Probability of death | 7.36% |
| Pennsylvania        | 2016 | 20-55 | Both | All causes | Probability of death | 7.27% |
| Nicaragua           | 2016 | 20-55 | Both | All causes | Probability of death | 7.26% |
| Uruguay             | 2016 | 20-55 | Both | All causes | Probability of death | 7.13% |
| Argentina           | 2016 | 20-55 | Both | All causes | Probability of death | 7.10% |
| Florida             | 2016 | 20-55 | Both | All causes | Probability of death | 7.09% |
| Kansas              | 2016 | 20-55 | Both | All causes | Probability of death | 7.08% |
| Armenia             | 2016 | 20-55 | Both | All causes | Probability of death | 7.08% |
| Poland              | 2016 | 20-55 | Both | All causes | Probability of death | 7.02% |
| Antigua and Barbuda | 2016 | 20-55 | Both | All causes | Probability of death | 7.02% |
| United States       | 2016 | 20-55 | Both | All causes | Probability of death | 6.99% |
| Texas               | 2016 | 20-55 | Both | All causes | Probability of death | 6.90% |
| Montenegro          | 2016 | 20-55 | Both | All causes | Probability of death | 6.88% |
| Jordan              | 2016 | 20-55 | Both | All causes | Probability of death | 6.83% |
| North Dakota        | 2016 | 20-55 | Both | All causes | Probability of death | 6.82% |
| Brunei              | 2016 | 20-55 | Both | All causes | Probability of death | 6.73% |
| Iran                | 2016 | 20-55 | Both | All causes | Probability of death | 6.71% |
| Maine               | 2016 | 20-55 | Both | All causes | Probability of death | 6.71% |
| Panama              | 2016 | 20-55 | Both | All causes | Probability of death | 6.69% |
| Idaho               | 2016 | 20-55 | Both | All causes | Probability of death | 6.68% |
| Slovakia            | 2016 | 20-55 | Both | All causes | Probability of death | 6.65% |
| Maryland            | 2016 | 20-55 | Both | All causes | Probability of death | 6.61% |
| China               | 2016 | 20-55 | Both | All causes | Probability of death | 6.55% |
| Macedonia           | 2016 | 20-55 | Both | All causes | Probability of death | 6.54% |
| Oman                | 2016 | 20-55 | Both | All causes | Probability of death | 6.51% |
| Utah                | 2016 | 20-55 | Both | All causes | Probability of death | 6.45% |
| Taiwan              | 2016 | 20-55 | Both | All causes | Probability of death | 6.40% |
| Rhode Island        | 2016 | 20-55 | Both | All causes | Probability of death | 6.38% |
| Oregon              | 2016 | 20-55 | Both | All causes | Probability of death | 6.38% |
| Illinois            | 2016 | 20-55 | Both | All causes | Probability of death | 6.36% |
| Virginia            | 2016 | 20-55 | Both | All causes | Probability of death | 6.27% |
| Nebraska            | 2016 | 20-55 | Both | All causes | Probability of death | 6.27% |
| Wisconsin           | 2016 | 20-55 | Both | All causes | Probability of death | 6.23% |
| Iowa                | 2016 | 20-55 | Both | All causes | Probability of death | 6.23% |
| Colorado            | 2016 | 20-55 | Both | All causes | Probability of death | 6.16% |
| Hawaii              | 2016 | 20-55 | Both | All causes | Probability of death | 6.13% |

|                        |      |       |      |            |                      |       |
|------------------------|------|-------|------|------------|----------------------|-------|
| Colombia               | 2016 | 20-55 | Both | All causes | Probability of death | 6.11% |
| Croatia                | 2016 | 20-55 | Both | All causes | Probability of death | 6.11% |
| New Hampshire          | 2016 | 20-55 | Both | All causes | Probability of death | 6.10% |
| Vermont                | 2016 | 20-55 | Both | All causes | Probability of death | 6.07% |
| Massachusetts          | 2016 | 20-55 | Both | All causes | Probability of death | 5.85% |
| Bosnia and Herzegovina | 2016 | 20-55 | Both | All causes | Probability of death | 5.85% |
| Algeria                | 2016 | 20-55 | Both | All causes | Probability of death | 5.83% |
| Washington             | 2016 | 20-55 | Both | All causes | Probability of death | 5.83% |
| New Jersey             | 2016 | 20-55 | Both | All causes | Probability of death | 5.82% |
| Tunisia                | 2016 | 20-55 | Both | All causes | Probability of death | 5.81% |
| Cuba                   | 2016 | 20-55 | Both | All causes | Probability of death | 5.75% |
| Connecticut            | 2016 | 20-55 | Both | All causes | Probability of death | 5.61% |
| Albania                | 2016 | 20-55 | Both | All causes | Probability of death | 5.56% |
| New York               | 2016 | 20-55 | Both | All causes | Probability of death | 5.52% |
| California             | 2016 | 20-55 | Both | All causes | Probability of death | 5.52% |
| Bermuda                | 2016 | 20-55 | Both | All causes | Probability of death | 5.49% |
| Costa Rica             | 2016 | 20-55 | Both | All causes | Probability of death | 5.38% |
| Chile                  | 2016 | 20-55 | Both | All causes | Probability of death | 5.28% |
| Minnesota              | 2016 | 20-55 | Both | All causes | Probability of death | 5.20% |
| Peru                   | 2016 | 20-55 | Both | All causes | Probability of death | 5.09% |
| Portugal               | 2016 | 20-55 | Both | All causes | Probability of death | 5.08% |
| South Korea            | 2016 | 20-55 | Both | All causes | Probability of death | 4.99% |
| Turkey                 | 2016 | 20-55 | Both | All causes | Probability of death | 4.97% |
| Czech Republic         | 2016 | 20-55 | Both | All causes | Probability of death | 4.92% |
| Saudi Arabia           | 2016 | 20-55 | Both | All causes | Probability of death | 4.92% |
| Bahrain                | 2016 | 20-55 | Both | All causes | Probability of death | 4.81% |
| France                 | 2016 | 20-55 | Both | All causes | Probability of death | 4.80% |
| Qatar                  | 2016 | 20-55 | Both | All causes | Probability of death | 4.60% |
| Greece                 | 2016 | 20-55 | Both | All causes | Probability of death | 4.54% |
| Lebanon                | 2016 | 20-55 | Both | All causes | Probability of death | 4.52% |
| Belgium                | 2016 | 20-55 | Both | All causes | Probability of death | 4.47% |
| Slovenia               | 2016 | 20-55 | Both | All causes | Probability of death | 4.46% |
| United Kingdom         | 2016 | 20-55 | Both | All causes | Probability of death | 4.40% |
| Finland                | 2016 | 20-55 | Both | All causes | Probability of death | 4.35% |
| Germany                | 2016 | 20-55 | Both | All causes | Probability of death | 4.25% |
| New Zealand            | 2016 | 20-55 | Both | All causes | Probability of death | 4.22% |
| Canada                 | 2016 | 20-55 | Both | All causes | Probability of death | 4.20% |
| Denmark                | 2016 | 20-55 | Both | All causes | Probability of death | 4.12% |
| Ireland                | 2016 | 20-55 | Both | All causes | Probability of death | 4.05% |
| Cyprus                 | 2016 | 20-55 | Both | All causes | Probability of death | 4.03% |
| Maldives               | 2016 | 20-55 | Both | All causes | Probability of death | 3.96% |
| Australia              | 2016 | 20-55 | Both | All causes | Probability of death | 3.94% |
| Austria                | 2016 | 20-55 | Both | All causes | Probability of death | 3.93% |
| Andorra                | 2016 | 20-55 | Both | All causes | Probability of death | 3.84% |
| Luxembourg             | 2016 | 20-55 | Both | All causes | Probability of death | 3.75% |
| Kuwait                 | 2016 | 20-55 | Both | All causes | Probability of death | 3.69% |
| Israel                 | 2016 | 20-55 | Both | All causes | Probability of death | 3.62% |
| Norway                 | 2016 | 20-55 | Both | All causes | Probability of death | 3.57% |

|             |            |      |            |                      |       |
|-------------|------------|------|------------|----------------------|-------|
| Spain       | 2016 20-55 | Both | All causes | Probability of death | 3.54% |
| Japan       | 2016 20-55 | Both | All causes | Probability of death | 3.51% |
| Netherlands | 2016 20-55 | Both | All causes | Probability of death | 3.51% |
| Sweden      | 2016 20-55 | Both | All causes | Probability of death | 3.44% |
| Italy       | 2016 20-55 | Both | All causes | Probability of death | 3.42% |
| Malta       | 2016 20-55 | Both | All causes | Probability of death | 3.40% |
| Iceland     | 2016 20-55 | Both | All causes | Probability of death | 3.37% |
| Switzerland | 2016 20-55 | Both | All causes | Probability of death | 3.05% |
| Singapore   | 2016 20-55 | Both | All causes | Probability of death | 3.05% |
