# Supplementary material
Source: PubMed Central journal article supplement (PMC5933332)
Supplement: jama-319-1444-s003.pdf [file jama-319-1444-s003.pdf]

**Supplement 3 to “The State of US Health: Burden of Diseases, Injuries, and Risk Factors among US states, 1990 to 2016”**

This supplement provides figures on leading most detailed causes of DALYs for the US states and DC from 1990 to 2016. States and DC are presented in alphabetical order.

Top 25 most-detailed causes of DALYs for 1990 and 2016 for both sexes in Alabama

| Leading causes 1990         | Leading causes 2016         | Mean % change number of DALYs 1990-2016 | Mean % change all-age DALY rate 1990-2016 | Mean % change age-standardized DALY rate 1990-2016 |
|-----------------------------|-----------------------------|-----------------------------------------|-------------------------------------------|----------------------------------------------------|
| 1 Ischemic heart disease    | 1 Ischemic heart disease    | -6.9% (-18.2 to 4.4%)                   | -22.2% (-31.6 to -12.7%)                  | -36.8% (-44.6 to -28.9%)                           |
| 2 Lung cancer               | 2 Lung cancer               | 25.8% (10.6 to 42.5%)                   | 5.2% (-7.5 to 19.2%)                      | -20.2% (-30.1 to -9.4%)                            |
| 3 Motor vehicle road inj    | 3 COPD                      | 95.3% (77.0 to 114.1%)                  | 63.3% (48.0 to 79.0%)                     | 28.4% (16.5 to 40.6%)                              |
| 4 Low back pain             | 4 Diabetes                  | 79.0% (65.1 to 93.0%)                   | 49.7% (38.1 to 61.4%)                     | 23.1% (13.7 to 32.6%)                              |
| 5 COPD                      | 5 Low back pain             | 32.1% (17.2 to 46.9%)                   | 10.5% (-2.0 to 22.8%)                     | 2.0% (-10.2 to 13.6%)                              |
| 6 Diabetes                  | 6 Motor vehicle road inj    | -15.4% (-25.0 to -4.6%)                 | -29.3% (-37.3 to -20.2%)                  | -27.0% (-35.6 to -17.3%)                           |
| 7 Ischemic stroke           | 7 Ischemic stroke           | 31.0% (17.7 to 45.2%)                   | 9.5% (-1.6 to 21.4%)                      | -12.7% (-21.5 to -3.6%)                            |
| 8 Other musculoskeletal     | 8 Opioid use disorders      | 71.1% (34.7 to 101.6%)                  | 43.0% (12.6 to 68.5%)                     | 55.9% (22.8 to 83.9%)                              |
| 9 Major depression          | 9 Alzheimer disease         | 53.8% (35.1 to 74.7%)                   | 28.6% (13.0 to 46.1%)                     | 0.7% (-10.7 to 14.1%)                              |
| 10 Neonatal preterm birth   | 10 Neck pain                | 55.4% (41.2 to 73.2%)                   | 29.9% (18.1 to 44.9%)                     | 12.3% (1.8 to 25.5%)                               |
| 11 Migraine                 | 11 Other musculoskeletal    | 24.5% (12.5 to 37.7%)                   | 4.1% (-5.9 to 15.1%)                      | -0.3% (-9.7 to 9.6%)                               |
| 12 Alzheimer disease        | 12 Lower respiratory infect | 71.1% (47.4 to 96.2%)                   | 43.1% (23.3 to 64.1%)                     | 16.4% (1.0 to 32.2%)                               |
| 13 Colorectal cancer        | 13 Intracerebral hem        | 47.2% (29.0 to 67.4%)                   | 23.1% (7.9 to 40.0%)                      | 0.7% (-12.0 to 14.6%)                              |
| 14 Neck pain                | 14 Major depression         | 21.0% (12.6 to 29.7%)                   | 1.2% (-5.8 to 8.5%)                       | 2.9% (-4.3 to 10.1%)                               |
| 15 Intracerebral hem        | 15 Migraine                 | 19.7% (15.6 to 23.8%)                   | 0.1% (-3.3 to 3.5%)                       | 0.7% (-2.7 to 4.3%)                                |
| 16 Opioid use disorders     | 16 Colorectal cancer        | 27.0% (10.7 to 43.9%)                   | 6.2% (-7.4 to 20.3%)                      | -14.4% (-25.2 to -3.1%)                            |
| 17 Anxiety disorders        | 17 Falls                    | 69.3% (55.8 to 80.5%)                   | 41.6% (30.3 to 51.0%)                     | 15.4% (7.2 to 22.4%)                               |
| 18 Lower respiratory infect | 18 Anxiety disorders        | 21.7% (15.0 to 28.8%)                   | 1.8% (-3.8 to 7.7%)                       | 1.2% (-4.3 to 7.2%)                                |
| 19 Breast cancer            | 19 Age-related hearing loss | 61.9% (55.2 to 69.2%)                   | 35.4% (29.8 to 41.5%)                     | 10.6% (6.0 to 15.5%)                               |
| 20 Self-harm by firearm     | 20 Diabetes CKD             | 129.3% (106.9 to 154.6%)                | 91.8% (73.0 to 112.9%)                    | 57.5% (42.7 to 74.8%)                              |
| 21 Violence firearm         | 21 Self-harm by firearm     | 21.4% (-2.8 to 46.3%)                   | 1.5% (-18.7 to 22.3%)                     | 2.0% (-17.7 to 22.9%)                              |
| 22 Falls                    | 22 Breast cancer            | 12.0% (-7.3 to 34.1%)                   | -6.3% (-22.5 to 12.1%)                    | -24.6% (-37.7 to -9.4%)                            |
| 23 Age-related hearing loss | 23 Neonatal preterm birth   | -26.5% (-35.2 to -17.0%)                | -38.5% (-45.8 to -30.6%)                  | -25.4% (-34.4 to -15.9%)                           |
| 24 Other cardiovascular     | 24 Other cardiovascular     | 29.6% (16.8 to 43.9%)                   | 8.4% (-2.3 to 20.3%)                      | -6.5% (-15.7 to 3.8%)                              |
| 25 Acne vulgaris            | 25 Violence firearm         | -3.2% (-19.7 to 16.2%)                  | -19.1% (-32.9 to -2.8%)                   | -10.3% (-25.4 to 7.9%)                             |
| 30 Diabetes CKD             | 31 Acne vulgaris            |                                         |                                           |                                                    |

Legend:

- Communicable, maternal, neonatal and nutritional
- Non-communicable
- Injuries

Top 25 most-detailed causes of DALYs for 1990 and 2016 for both sexes in Alaska

| Leading causes 1990         | Leading causes 2016         | Mean % change number of DALYs 1990-2016 | Mean % change all-age DALY rate 1990-2016 | Mean % change age-standardized DALY rate 1990-2016 |
|-----------------------------|-----------------------------|-----------------------------------------|-------------------------------------------|----------------------------------------------------|
| 1 Ischemic heart disease    | 1 Ischemic heart disease    | 43.9% (23.9 to 65.2%)                   | 8.5% (-6.5 to 24.6%)                      | -49.3% (-56.0 to -42.0%)                           |
| 2 Low back pain             | 2 Lung cancer               | 99.3% (70.6 to 128.9%)                  | 50.3% (28.7 to 72.7%)                     | -25.8% (-36.1 to -14.9%)                           |
| 3 Other transport inj       | 3 Low back pain             | 48.9% (31.2 to 66.8%)                   | 12.4% (-1.1 to 25.8%)                     | -6.1% (-16.5 to 4.0%)                              |
| 4 Motor vehicle road inj    | 4 Diabetes                  | 158.7% (139.2 to 180.1%)                | 95.1% (80.5 to 111.3%)                    | 13.9% (5.1 to 22.9%)                               |
| 5 Major depression          | 5 COPD                      | 169.2% (141.9 to 198.4%)                | 103.1% (82.5 to 125.1%)                   | -4.2% (-14.3 to 6.5%)                              |
| 6 Lung cancer               | 6 Opioid use disorders      | 164.7% (104.8 to 206.8%)                | 99.7% (54.5 to 131.4%)                    | 116.9% (66.4 to 152.1%)                            |
| 7 Alcohol use disorders     | 7 Alcohol use disorders     | 55.6% (38.5 to 75.2%)                   | 17.4% (4.5 to 32.2%)                      | 13.5% (1.8 to 26.4%)                               |
| 8 Migraine                  | 8 Major depression          | 40.7% (30.1 to 52.4%)                   | 6.1% (-1.9 to 15.0%)                      | 5.9% (-2.0 to 14.2%)                               |
| 9 Self-harm by firearm      | 9 Other musculoskeletal     | 63.4% (42.3 to 86.2%)                   | 23.3% (7.4 to 40.5%)                      | 6.0% (-5.1 to 18.0%)                               |
| 10 Anxiety disorders        | 10 Self-harm by firearm     | 45.7% (-1.5 to 79.9%)                   | 9.9% (-25.7 to 35.7%)                     | 5.7% (-27.2 to 30.1%)                              |
| 11 Neonatal preterm birth   | 11 Neck pain                | 76.1% (59.6 to 93.7%)                   | 32.9% (20.4 to 46.1%)                     | 3.8% (-2.9 to 11.1%)                               |
| 12 Other musculoskeletal    | 12 Migraine                 | 26.7% (21.8 to 32.1%)                   | -4.4% (-8.1 to -0.4%)                     | -3.0% (-6.4 to 0.7%)                               |
| 13 Neck pain                | 13 Anxiety disorders        | 37.1% (28.8 to 45.4%)                   | 3.4% (-2.8 to 9.7%)                       | 1.9% (-3.6 to 7.7%)                                |
| 14 Diabetes                 | 14 Falls                    | 97.1% (81.7 to 113.1%)                  | 48.7% (37.1 to 60.8%)                     | 11.1% (1.8 to 19.0%)                               |
| 15 COPD                     | 15 Motor vehicle road inj   | -27.0% (-37.2 to -13.3%)                | -44.9% (-52.6 to -34.6%)                  | -45.4% (-53.1 to -35.4%)                           |
| 16 Opioid use disorders     | 16 Other transport inj      | -29.1% (-39.4 to -15.5%)                | -46.5% (-54.3 to -36.3%)                  | -46.3% (-53.5 to -37.3%)                           |
| 17 Drowning                 | 17 Alzheimer disease        | 258.8% (222.3 to 296.9%)                | 170.7% (143.2 to 199.4%)                  | 2.2% (-7.9 to 12.6%)                               |
| 18 SIDS                     | 18 Ischemic stroke          | 131.0% (109.0 to 154.5%)                | 74.3% (57.7 to 92.0%)                     | -21.3% (-28.8 to -13.6%)                           |
| 19 Falls                    | 19 Colorectal cancer        | 99.0% (70.6 to 129.8%)                  | 50.2% (28.7 to 73.3%)                     | -22.2% (-33.2 to -11.1%)                           |
| 20 Acne vulgaris            | 20 Self-harm other means    | 82.6% (39.1 to 119.8%)                  | 37.8% (4.9 to 65.8%)                      | 41.9% (9.2 to 70.3%)                               |
| 21 Other mechanical forces  | 21 Age-related hearing loss | 151.0% (138.5 to 163.5%)                | 89.3% (79.9 to 98.8%)                     | 9.1% (5.0 to 13.6%)                                |
| 22 Self-harm other means    | 22 Intracerebral hem        | 86.5% (62.4 to 114.0%)                  | 40.7% (22.5 to 61.4%)                     | -10.0% (-21.2 to 2.5%)                             |
| 23 Fire & heat              | 23 Breast cancer            | 70.2% (36.1 to 106.4%)                  | 28.4% (2.7 to 55.7%)                      | -21.2% (-36.9 to -4.3%)                            |
| 24 Colorectal cancer        | 24 Acne vulgaris            | 16.8% (11.4 to 22.2%)                   | -11.8% (-15.9 to -7.8%)                   | -3.1% (-7.5 to 1.3%)                               |
| 25 Violence firearm         | 25 Neonatal preterm birth   | -33.8% (-44.3 to -22.2%)                | -50.0% (-57.9 to -41.3%)                  | -35.1% (-45.3 to -24.2%)                           |
| 29 Ischemic stroke          | 34 Drowning                 |                                         |                                           |                                                    |
| 31 Intracerebral hem        | 38 Violence firearm         |                                         |                                           |                                                    |
| 33 Breast cancer            | 39 Other mechanical forces  |                                         |                                           |                                                    |
| 36 Age-related hearing loss | 48 Fire & heat              |                                         |                                           |                                                    |
| 41 Alzheimer disease        | 69 SIDS                     |                                         |                                           |                                                    |

Legend:

- Communicable, maternal, neonatal and nutritional
- Non-communicable
- Injuries

Top 25 most-detailed causes of DALYs for 1990 and 2016 for both sexes in Arizona

| Leading causes 1990         | Leading causes 2016         | Mean % change number of DALYs 1990-2016 | Mean % change all-age DALY rate 1990-2016 | Mean % change age-standardized DALY rate 1990-2016 |
|-----------------------------|-----------------------------|-----------------------------------------|-------------------------------------------|----------------------------------------------------|
| 1 Ischemic heart disease    | 1 Ischemic heart disease    | 19.4% (8.6 to 31.1%)                    | -36.2% (-42.0 to -29.9%)                  | -51.2% (-55.6 to -46.3%)                           |
| 2 Lung cancer               | 2 COPD                      | 117.8% (101.1 to 136.8%)                | 16.4% (7.5 to 26.6%)                      | -10.8% (-17.4 to -3.2%)                            |
| 3 Low back pain             | 3 Low back pain             | 101.4% (78.8 to 123.6%)                 | 7.7% (-4.4 to 19.5%)                      | -4.0% (-15.3 to 6.3%)                              |
| 4 COPD                      | 4 Diabetes                  | 187.2% (167.2 to 207.2%)                | 53.5% (42.8 to 64.2%)                     | 23.2% (14.6 to 31.8%)                              |
| 5 Motor vehicle road inj    | 5 Opioid use disorders      | 132.4% (88.5 to 164.0%)                 | 24.2% (0.8 to 41.1%)                      | 35.7% (9.9 to 54.3%)                               |
| 6 Major depression          | 6 Lung cancer               | 53.2% (36.5 to 71.0%)                   | -18.1% (-27.0 to -8.6%)                   | -39.1% (-45.8 to -31.8%)                           |
| 7 Opioid use disorders      | 7 Major depression          | 84.0% (72.5 to 96.0%)                   | -1.7% (-7.8 to 4.8%)                      | -0.4% (-6.4 to 5.8%)                               |
| 8 Diabetes                  | 8 Alzheimer disease         | 179.5% (145.0 to 216.2%)                | 49.4% (31.0 to 69.0%)                     | 3.7% (-8.8 to 16.6%)                               |
| 9 Migraine                  | 9 Other musculoskeletal     | 100.3% (82.8 to 120.1%)                 | 7.0% (-2.3 to 17.7%)                      | 0.9% (-7.1 to 10.5%)                               |
| 10 Other musculoskeletal    | 10 Migraine                 | 87.0% (80.9 to 93.1%)                   | 0.0% (-3.3 to 3.2%)                       | -0.6% (-3.8 to 2.5%)                               |
| 11 Anxiety disorders        | 11 Neck pain                | 142.0% (117.1 to 170.4%)                | 29.4% (16.1 to 44.5%)                     | 8.4% (-2.9 to 21.6%)                               |
| 12 Neck pain                | 12 Falls                    | 177.4% (146.7 to 196.2%)                | 48.3% (31.8 to 58.3%)                     | 15.5% (4.7 to 22.7%)                               |
| 13 Ischemic stroke          | 13 Motor vehicle road inj   | 14.4% (2.0 to 27.0%)                    | -38.9% (-45.5 to -32.1%)                  | -39.0% (-45.8 to -32.1%)                           |
| 14 Self-harm by firearm     | 14 Anxiety disorders        | 92.3% (82.9 to 102.6%)                  | 2.8% (-2.2 to 8.3%)                       | 1.3% (-3.7 to 6.6%)                                |
| 15 Alzheimer disease        | 15 Ischemic stroke          | 95.0% (78.9 to 111.4%)                  | 4.2% (-4.4 to 13.0%)                      | -22.1% (-28.4 to -15.8%)                           |
| 16 Colorectal cancer        | 16 Age-related hearing loss | 167.2% (155.4 to 181.3%)                | 42.8% (36.5 to 50.4%)                     | 11.9% (7.2 to 17.2%)                               |
| 17 Neonatal preterm birth   | 17 Alcohol use disorders    | 91.7% (74.5 to 110.5%)                  | 2.5% (-6.7 to 12.5%)                      | 1.0% (-7.4 to 10.3%)                               |
| 18 Alcohol use disorders    | 18 Colorectal cancer        | 72.5% (53.7 to 94.8%)                   | -7.8% (-17.9 to 4.1%)                     | -26.9% (-35.0 to -17.8%)                           |
| 19 Falls                    | 19 Self-harm by firearm     | 49.0% (22.3 to 73.3%)                   | -20.3% (-34.6 to -7.4%)                   | -20.9% (-35.0 to -8.2%)                            |
| 20 Lower respiratory infect | 20 Self-harm other means    | 134.6% (88.7 to 172.6%)                 | 25.4% (0.9 to 45.7%)                      | 29.9% (4.5 to 50.6%)                               |
| 21 Breast cancer            | 21 Lower respiratory infect | 57.8% (38.5 to 77.2%)                   | -15.7% (-26.0 to -5.3%)                   | -30.6% (-38.3 to -22.4%)                           |
| 22 Age-related hearing loss | 22 Breast cancer            | 65.1% (40.3 to 89.9%)                   | -11.8% (-25.0 to 1.5%)                    | -30.4% (-41.1 to -19.9%)                           |
| 23 Acne vulgaris            | 23 Intracerebral hem        | 96.1% (75.3 to 119.0%)                  | 4.8% (-6.3 to 17.1%)                      | -16.2% (-25.0 to -6.5%)                            |
| 24 HIV/AIDS other           | 24 Osteoarthritis           | 159.2% (146.4 to 172.7%)                | 38.5% (31.7 to 45.8%)                     | 7.5% (1.9 to 13.1%)                                |
| 25 Intracerebral hem        | 25 Acne vulgaris            | 66.4% (60.0 to 72.3%)                   | -11.1% (-14.5 to -7.9%)                   | -3.6% (-7.4 to 0.0%)                               |
| 27 Self-harm other means    | 28 Neonatal preterm birth   |                                         |                                           |                                                    |
| 32 Osteoarthritis           | 70 HIV/AIDS other           |                                         |                                           |                                                    |

Legend:

- Communicable, maternal, neonatal and nutritional
- Non-communicable
- Injuries

Top 25 most-detailed causes of DALYs for 1990 and 2016 for both sexes in Arkansas

| Leading causes 1990         | Leading causes 2016         | Mean % change number of DALYs 1990-2016 | Mean % change all-age DALY rate 1990-2016 | Mean % change age-standardized DALY rate 1990-2016 |
|-----------------------------|-----------------------------|-----------------------------------------|-------------------------------------------|----------------------------------------------------|
| 1 Ischemic heart disease    | 1 Ischemic heart disease    | -5.1% (-14.1 to 3.8%)                   | -24.6% (-31.7 to -17.5%)                  | -32.6% (-39.1 to -26.3%)                           |
| 2 Lung cancer               | 2 Lung cancer               | 24.9% (11.1 to 40.1%)                   | -0.8% (-11.7 to 11.4%)                    | -19.1% (-28.1 to -9.2%)                            |
| 3 Motor vehicle road inj    | 3 COPD                      | 97.6% (81.7 to 115.3%)                  | 57.0% (44.4 to 71.1%)                     | 35.9% (25.3 to 48.2%)                              |
| 4 Low back pain             | 4 Diabetes                  | 86.8% (74.1 to 100.2%)                  | 48.5% (38.3 to 59.1%)                     | 31.7% (22.7 to 40.8%)                              |
| 5 COPD                      | 5 Low back pain             | 18.8% (4.8 to 33.3%)                    | -5.6% (-16.7 to 5.9%)                     | -10.9% (-21.7 to 0.5%)                             |
| 6 Ischemic stroke           | 6 Motor vehicle road inj    | -7.3% (-16.3 to 2.5%)                   | -26.3% (-33.5 to -18.6%)                  | -26.4% (-33.6 to -18.7%)                           |
| 7 Diabetes                  | 7 Ischemic stroke           | 15.4% (5.8 to 25.6%)                    | -8.3% (-15.9 to -0.2%)                    | -17.9% (-24.7 to -11.0%)                           |
| 8 Major depression          | 8 Major depression          | 25.4% (17.9 to 33.0%)                   | -0.4% (-6.3 to 5.7%)                      | 0.4% (-5.4 to 6.5%)                                |
| 9 Alzheimer disease         | 9 Alzheimer disease         | 36.5% (21.5 to 53.8%)                   | 8.4% (-3.5 to 22.2%)                      | -3.4% (-13.7 to 8.4%)                              |
| 10 Other musculoskeletal    | 10 Lower respiratory infect | 48.4% (30.5 to 67.0%)                   | 17.9% (3.7 to 32.7%)                      | 2.1% (-9.2 to 14.2%)                               |
| 11 Migraine                 | 11 Opioid use disorders     | 49.4% (26.5 to 69.9%)                   | 18.7% (0.5 to 35.0%)                      | 26.1% (6.7 to 43.6%)                               |
| 12 Colorectal cancer        | 12 Other musculoskeletal    | 17.8% (6.4 to 29.9%)                    | -6.4% (-15.4 to 3.2%)                     | -8.3% (-16.9 to 0.1%)                              |
| 13 Lower respiratory infect | 13 Migraine                 | 24.8% (20.7 to 29.2%)                   | -0.8% (-4.1 to 2.7%)                      | -1.2% (-4.5 to 2.4%)                               |
| 14 Anxiety disorders        | 14 Intracerebral hem        | 41.8% (27.8 to 57.0%)                   | 12.7% (1.5 to 24.7%)                      | -1.8% (-11.5 to 8.5%)                              |
| 15 Intracerebral hem        | 15 Falls                    | 79.6% (62.1 to 91.2%)                   | 42.7% (28.8 to 51.9%)                     | 22.1% (11.6 to 29.6%)                              |
| 16 Opioid use disorders     | 16 Colorectal cancer        | 30.3% (16.4 to 45.8%)                   | 3.6% (-7.5 to 15.9%)                      | -9.1% (-18.6 to 1.9%)                              |
| 17 Neck pain                | 17 Anxiety disorders        | 28.4% (21.8 to 35.6%)                   | 2.1% (-3.2 to 7.8%)                       | 1.2% (-4.1 to 6.8%)                                |
| 18 Neonatal preterm birth   | 18 Neck pain                | 39.5% (25.5 to 56.5%)                   | 10.9% (-0.3 to 24.4%)                     | -0.3% (-11.0 to 12.4%)                             |
| 19 Self-harm by firearm     | 19 Age-related hearing loss | 54.8% (48.4 to 62.0%)                   | 23.0% (18.0 to 28.7%)                     | 10.0% (5.5 to 15.0%)                               |
| 20 Breast cancer            | 20 Self-harm by firearm     | 30.5% (4.6 to 54.2%)                    | 3.7% (-16.9 to 22.5%)                     | 3.6% (-18.1 to 22.6%)                              |
| 21 Falls                    | 21 Diabetes CKD             | 133.7% (113.6 to 154.7%)                | 85.7% (69.7 to 102.4%)                    | 65.8% (51.5 to 80.5%)                              |
| 22 Age-related hearing loss | 22 Breast cancer            | 19.0% (1.5 to 38.1%)                    | -5.5% (-19.3 to 9.7%)                     | -19.0% (-30.9 to -5.6%)                            |
| 23 Other cardiovascular     | 23 Other cardiovascular     | 27.5% (16.7 to 39.9%)                   | 1.3% (-7.2 to 11.2%)                      | -5.8% (-13.7 to 3.5%)                              |
| 24 Violence firearm         | 24 Self-harm other means    | 109.5% (56.8 to 145.1%)                 | 66.5% (24.6 to 94.8%)                     | 71.5% (28.0 to 102.2%)                             |
| 25 Acne vulgaris            | 25 Pancreatic cancer        | 53.6% (35.8 to 72.5%)                   | 22.1% (7.9 to 37.1%)                      | 5.0% (-7.3 to 18.1%)                               |
| 29 Pancreatic cancer        | 26 Neonatal preterm birth   |                                         |                                           |                                                    |
| 31 Diabetes CKD             | 29 Violence firearm         |                                         |                                           |                                                    |
| 35 Self-harm other means    | 32 Acne vulgaris            |                                         |                                           |                                                    |

Legend:

- Communicable, maternal, neonatal and nutritional
- Non-communicable
- Injuries

Top 25 most-detailed causes of DALYs for 1990 and 2016 for both sexes in California

| Leading causes 1990         | Leading causes 2016         | Mean % change number of DALYs 1990-2016 | Mean % change all-age DALY rate 1990-2016 | Mean % change age-standardized DALY rate 1990-2016 |
|-----------------------------|-----------------------------|-----------------------------------------|-------------------------------------------|----------------------------------------------------|
| 1 Ischemic heart disease    | 1 Ischemic heart disease    | -15.6% (-24.7 to -6.1%)                 | -35.7% (-42.6 to -28.4%)                  | -53.1% (-58.2 to -47.7%)                           |
| 2 Lung cancer               | 2 Low back pain             | 20.7% (6.5 to 35.0%)                    | -8.1% (-18.8 to 2.9%)                     | -19.2% (-28.8 to -9.3%)                            |
| 3 Low back pain             | 3 Diabetes                  | 104.0% (88.3 to 121.1%)                 | 55.4% (43.5 to 68.5%)                     | 20.3% (11.0 to 30.5%)                              |
| 4 HIV/AIDS other            | 4 COPD                      | 41.1% (28.9 to 53.7%)                   | 7.5% (-1.8 to 17.1%)                      | -19.9% (-26.8 to -12.8%)                           |
| 5 Motor vehicle road inj    | 5 Lung cancer               | -10.1% (-20.8 to 1.4%)                  | -31.5% (-39.6 to -22.8%)                  | -50.1% (-56.1 to -43.8%)                           |
| 6 COPD                      | 6 Major depression          | 25.7% (16.3 to 36.0%)                   | -4.2% (-11.4 to 3.7%)                     | -3.0% (-10.0 to 4.1%)                              |
| 7 Major depression          | 7 Other musculoskeletal     | 37.1% (23.2 to 52.3%)                   | 4.5% (-6.1 to 16.0%)                      | -3.1% (-12.2 to 6.5%)                              |
| 8 Migraine                  | 8 Alzheimer disease         | 96.7% (74.0 to 119.7%)                  | 49.9% (32.6 to 67.4%)                     | 2.8% (-8.6 to 14.5%)                               |
| 9 Other musculoskeletal     | 9 Migraine                  | 31.1% (26.6 to 35.8%)                   | -0.1% (-3.5 to 3.5%)                      | -1.4% (-4.7 to 2.2%)                               |
| 10 Diabetes                 | 10 Opioid use disorders     | 52.6% (29.0 to 70.9%)                   | 16.3% (-1.7 to 30.2%)                     | 26.1% (7.2 to 40.9%)                               |
| 11 Anxiety disorders        | 11 Anxiety disorders        | 28.5% (20.9 to 35.9%)                   | -2.1% (-7.9 to 3.5%)                      | -3.6% (-9.3 to 1.7%)                               |
| 12 Opioid use disorders     | 12 Neck pain                | 51.7% (32.3 to 71.9%)                   | 15.6% (0.8 to 31.0%)                      | -4.3% (-16.6 to 8.6%)                              |
| 13 Ischemic stroke          | 13 Falls                    | 71.6% (58.4 to 81.2%)                   | 30.7% (20.7 to 38.1%)                     | 6.6% (-1.4 to 12.2%)                               |
| 14 Neonatal preterm birth   | 14 Ischemic stroke          | 21.0% (10.5 to 31.9%)                   | -7.8% (-15.8 to 0.5%)                     | -32.6% (-38.6 to -26.6%)                           |
| 15 Neck pain                | 15 Age-related hearing loss | 83.8% (77.0 to 91.1%)                   | 40.0% (34.8 to 45.6%)                     | 8.8% (5.0 to 13.3%)                                |
| 16 Alzheimer disease        | 16 Motor vehicle road inj   | -32.1% (-40.5 to -23.0%)                | -48.2% (-54.7 to -41.3%)                  | -48.0% (-54.5 to -41.1%)                           |
| 17 Colorectal cancer        | 17 Colorectal cancer        | 22.9% (7.2 to 38.3%)                    | -6.3% (-18.3 to 5.4%)                     | -29.5% (-38.6 to -20.4%)                           |
| 18 Lower respiratory infect | 18 Acne vulgaris            | 18.2% (14.3 to 22.2%)                   | -9.9% (-12.9 to -6.9%)                    | -1.7% (-5.0 to 1.8%)                               |
| 19 Violence firearm         | 19 Intracerebral hem        | 23.5% (9.0 to 39.2%)                    | -5.9% (-16.9 to 6.0%)                     | -26.6% (-35.1 to -17.3%)                           |
| 20 Acne vulgaris            | 20 Alcohol use disorders    | 25.0% (12.7 to 38.2%)                   | -4.7% (-14.1 to 5.3%)                     | -5.1% (-13.5 to 4.1%)                              |
| 21 Falls                    | 21 Breast cancer            | 11.1% (-7.2 to 33.3%)                   | -15.4% (-29.3 to 1.5%)                    | -35.6% (-46.3 to -22.8%)                           |
| 22 Breast cancer            | 22 Self-harm other means    | 33.8% (-0.6 to 60.1%)                   | 2.0% (-24.3 to 22.0%)                     | 4.0% (-22.5 to 26.0%)                              |
| 23 Intracerebral hem        | 23 Dermatitis               | 26.1% (21.7 to 30.4%)                   | -3.9% (-7.3 to -0.6%)                     | 0.3% (-3.0 to 3.5%)                                |
| 24 Alcohol use disorders    | 24 Lower respiratory infect | -8.1% (-19.5 to 4.5%)                   | -30.0% (-38.7 to -20.4%)                  | -44.0% (-50.9 to -36.3%)                           |
| 25 Age-related hearing loss | 25 Diabetes CKD             | 139.5% (118.9 to 161.6%)                | 82.5% (66.8 to 99.3%)                     | 41.4% (29.7 to 54.1%)                              |
| 26 Dermatitis               | 27 Neonatal preterm birth   |                                         |                                           |                                                    |
| 27 Self-harm other means    | 33 Violence firearm         |                                         |                                           |                                                    |
| 46 Diabetes CKD             | 53 HIV/AIDS other           |                                         |                                           |                                                    |

Legend:

- Communicable, maternal, neonatal and nutritional
- Non-communicable
- Injuries

Top 25 most-detailed causes of DALYs for 1990 and 2016 for both sexes in Colorado

| Leading causes 1990         | Leading causes 2016         | Mean % change number of DALYs 1990-2016 | Mean % change all-age DALY rate 1990-2016 | Mean % change age-standardized DALY rate 1990-2016 |
|-----------------------------|-----------------------------|-----------------------------------------|-------------------------------------------|----------------------------------------------------|
| 1 Ischemic heart disease    | 1 Ischemic heart disease    | 3.2% (-5.5 to 13.4%)                    | -37.9% (-43.2 to -31.8%)                  | -54.5% (-58.5 to -50.0%)                           |
| 2 Low back pain             | 2 COPD                      | 94.7% (79.4 to 110.1%)                  | 17.2% (7.9 to 26.4%)                      | -14.3% (-21.1 to -7.6%)                            |
| 3 COPD                      | 3 Low back pain             | 61.4% (42.6 to 80.3%)                   | -2.9% (-14.2 to 8.5%)                     | -13.5% (-23.9 to -3.2%)                            |
| 4 Major depression          | 4 Major depression          | 65.5% (54.8 to 77.5%)                   | -0.4% (-6.9 to 6.8%)                      | 1.0% (-5.6 to 7.8%)                                |
| 5 Lung cancer               | 5 Opioid use disorders      | 263.9% (185.0 to 318.6%)                | 119.0% (71.5 to 151.9%)                   | 138.9% (87.3 to 174.4%)                            |
| 6 Motor vehicle road inj    | 6 Other musculoskeletal     | 77.2% (60.4 to 93.8%)                   | 6.6% (-3.5 to 16.6%)                      | -1.1% (-9.6 to 7.7%)                               |
| 7 Migraine                  | 7 Alzheimer disease         | 157.5% (128.7 to 187.5%)                | 54.9% (37.6 to 73.0%)                     | 13.1% (0.6 to 26.0%)                               |
| 8 Other musculoskeletal     | 8 Lung cancer               | 47.9% (32.9 to 64.2%)                   | -11.0% (-20.0 to -1.2%)                   | -36.7% (-43.1 to -29.7%)                           |
| 9 Anxiety disorders         | 9 Falls                     | 145.7% (119.5 to 162.7%)                | 47.9% (32.1 to 58.1%)                     | 20.1% (8.1 to 27.8%)                               |
| 10 Diabetes                 | 10 Diabetes                 | 124.3% (107.1 to 143.3%)                | 34.9% (24.6 to 46.4%)                     | 3.9% (-4.1 to 12.8%)                               |
| 11 Neck pain                | 11 Migraine                 | 59.0% (53.4 to 64.8%)                   | -4.4% (-7.7 to -0.9%)                     | -4.1% (-7.4 to -0.9%)                              |
| 12 Alzheimer disease        | 12 Anxiety disorders        | 70.2% (60.9 to 79.7%)                   | 2.4% (-3.2 to 8.1%)                       | 1.3% (-4.0 to 6.5%)                                |
| 13 Falls                    | 13 Neck pain                | 93.2% (71.6 to 118.2%)                  | 16.3% (3.3 to 31.3%)                      | -1.5% (-12.3 to 11.0%)                             |
| 14 Ischemic stroke          | 14 Alcohol use disorders    | 104.2% (85.2 to 124.1%)                 | 22.8% (11.5 to 34.8%)                     | 19.2% (9.1 to 29.9%)                               |
| 15 HIV/AIDS other           | 15 Motor vehicle road inj   | 3.8% (-6.9 to 15.3%)                    | -37.6% (-44.0 to -30.6%)                  | -38.6% (-44.7 to -32.2%)                           |
| 16 Self-harm by firearm     | 16 Self-harm other means    | 98.3% (71.8 to 126.1%)                  | 19.3% (3.4 to 36.1%)                      | 24.1% (7.4 to 42.0%)                               |
| 17 Alcohol use disorders    | 17 Ischemic stroke          | 76.3% (62.3 to 91.1%)                   | 6.1% (-2.3 to 15.0%)                      | -21.4% (-27.7 to -14.9%)                           |
| 18 Neonatal preterm birth   | 18 Age-related hearing loss | 132.4% (123.2 to 142.2%)                | 39.8% (34.3 to 45.7%)                     | 9.1% (4.9 to 13.9%)                                |
| 19 Self-harm other means    | 19 Self-harm by firearm     | 51.9% (24.0 to 79.0%)                   | -8.6% (-25.4 to 7.7%)                     | -10.7% (-26.3 to 5.1%)                             |
| 20 Colorectal cancer        | 20 Colorectal cancer        | 61.7% (45.0 to 80.8%)                   | -2.7% (-12.8 to 8.8%)                     | -28.1% (-35.5 to -19.7%)                           |
| 21 Lower respiratory infect | 21 Acne vulgaris            | 51.0% (45.2 to 57.0%)                   | -9.2% (-12.6 to -5.5%)                    | -2.1% (-5.8 to 2.0%)                               |
| 22 Breast cancer            | 22 Osteoarthritis           | 138.7% (129.9 to 147.9%)                | 43.6% (38.4 to 49.2%)                     | 7.7% (3.6 to 11.9%)                                |
| 23 Acne vulgaris            | 23 Lower respiratory infect | 43.7% (28.1 to 61.6%)                   | -13.5% (-22.9 to -2.8%)                   | -31.1% (-38.4 to -23.2%)                           |
| 24 Opioid use disorders     | 24 Intracerebral hem        | 79.1% (61.0 to 100.6%)                  | 7.8% (-3.1 to 20.7%)                      | -15.9% (-24.3 to -6.1%)                            |
| 25 Age-related hearing loss | 25 Breast cancer            | 40.5% (21.5 to 60.5%)                   | -15.5% (-26.9 to -3.4%)                   | -35.5% (-44.2 to -26.3%)                           |
| 27 Intracerebral hem        | 27 Neonatal preterm birth   |                                         |                                           |                                                    |
| 31 Osteoarthritis           | 86 HIV/AIDS other           |                                         |                                           |                                                    |

Legend:

- Communicable, maternal, neonatal and nutritional
- Non-communicable
- Injuries

Top 25 most-detailed causes of DALYs for 1990 and 2016 for both sexes in Connecticut

| Leading causes 1990         | Leading causes 2016         | Mean % change number of DALYs 1990-2016 | Mean % change all-age DALY rate 1990-2016 | Mean % change age-standardized DALY rate 1990-2016 |
|-----------------------------|-----------------------------|-----------------------------------------|-------------------------------------------|----------------------------------------------------|
| 1 Ischemic heart disease    | 1 Ischemic heart disease    | -38.5% (-45.0 to -30.8%)                | -43.4% (-49.4 to -36.3%)                  | -55.8% (-60.7 to -49.9%)                           |
| 2 Lung cancer               | 2 Lung cancer               | -7.4% (-18.4 to 5.6%)                   | -14.8% (-24.9 to -2.8%)                   | -34.2% (-42.0 to -24.8%)                           |
| 3 Low back pain             | 3 Diabetes                  | 53.4% (40.5 to 66.7%)                   | 41.2% (29.3 to 53.4%)                     | 15.8% (6.0 to 25.9%)                               |
| 4 COPD                      | 4 COPD                      | 35.7% (23.9 to 49.0%)                   | 24.9% (14.0 to 37.2%)                     | -0.3% (-9.0 to 9.2%)                               |
| 5 Opioid use disorders      | 5 Alzheimer disease         | 60.8% (41.6 to 81.6%)                   | 48.0% (30.3 to 67.2%)                     | 7.0% (-5.7 to 21.0%)                               |
| 6 Diabetes                  | 6 Low back pain             | -0.9% (-13.3 to 12.4%)                  | -8.8% (-20.2 to 3.5%)                     | -16.4% (-27.1 to -4.7%)                            |
| 7 Other musculoskeletal     | 7 Opioid use disorders      | 32.9% (8.7 to 52.7%)                    | 22.3% (0.0 to 40.6%)                      | 42.5% (15.3 to 63.7%)                              |
| 8 Migraine                  | 8 Neck pain                 | 35.2% (20.4 to 51.9%)                   | 24.4% (10.9 to 39.8%)                     | 8.2% (-4.0 to 21.5%)                               |
| 9 Alzheimer disease         | 9 Other musculoskeletal     | 11.8% (1.5 to 22.4%)                    | 2.9% (-6.6 to 12.7%)                      | -0.1% (-8.8 to 8.8%)                               |
| 10 Major depression         | 10 Migraine                 | 5.2% (1.4 to 9.1%)                      | -3.2% (-6.7 to 0.4%)                      | -2.0% (-5.5 to 1.5%)                               |
| 11 Motor vehicle road inj   | 11 Falls                    | 68.9% (50.4 to 80.5%)                   | 55.4% (38.5 to 66.1%)                     | 25.5% (13.2 to 33.3%)                              |
| 12 Neck pain                | 12 Major depression         | 5.0% (-1.9 to 12.2%)                    | -3.3% (-9.7 to 3.3%)                      | -1.6% (-8.0 to 4.7%)                               |
| 13 Colorectal cancer        | 13 Anxiety disorders        | 10.4% (4.6 to 16.3%)                    | 1.6% (-3.7 to 7.0%)                       | 1.4% (-3.8 to 6.9%)                                |
| 14 Anxiety disorders        | 14 Ischemic stroke          | 7.5% (-2.7 to 18.1%)                    | -1.1% (-10.5 to 8.7%)                     | -23.2% (-30.6 to -15.5%)                           |
| 15 Ischemic stroke          | 15 Age-related hearing loss | 42.7% (37.7 to 48.6%)                   | 31.4% (26.7 to 36.7%)                     | 7.8% (4.2 to 12.0%)                                |
| 16 HIV/AIDS other           | 16 Colorectal cancer        | -13.8% (-23.6 to -2.0%)                 | -20.7% (-29.7 to -9.8%)                   | -35.8% (-43.3 to -27.1%)                           |
| 17 Breast cancer            | 17 Lower respiratory infect | 0.9% (-12.2 to 16.6%)                   | -7.2% (-19.2 to 7.3%)                     | -26.1% (-35.2 to -15.0%)                           |
| 18 Neonatal preterm birth   | 18 Motor vehicle road inj   | -33.5% (-41.3 to -24.0%)                | -38.7% (-46.0 to -30.1%)                  | -38.6% (-45.7 to -29.9%)                           |
| 19 Lower respiratory infect | 19 Breast cancer            | -18.0% (-31.8 to -2.4%)                 | -24.5% (-37.3 to -10.2%)                  | -39.6% (-50.0 to -28.1%)                           |
| 20 Falls                    | 20 Osteoarthritis           | 56.0% (47.7 to 65.1%)                   | 43.6% (36.0 to 51.9%)                     | 14.4% (8.1 to 21.2%)                               |
| 21 Age-related hearing loss | 21 Acne vulgaris            | 3.3% (-0.2 to 7.2%)                     | -4.9% (-8.2 to -1.4%)                     | 0.4% (-3.0 to 4.4%)                                |
| 22 Acne vulgaris            | 22 Intracerebral hem        | 1.9% (-9.6 to 16.4%)                    | -6.3% (-16.8 to 7.2%)                     | -24.4% (-32.9 to -13.7%)                           |
| 23 Intracerebral hem        | 23 Self-harm other means    | 7.3% (-10.5 to 27.7%)                   | -1.3% (-17.6 to 17.5%)                    | 3.6% (-13.7 to 22.9%)                              |
| 24 Other cardiovascular     | 24 Other cardiovascular     | -1.7% (-11.6 to 8.7%)                   | -9.5% (-18.6 to 0.1%)                     | -25.4% (-32.9 to -17.7%)                           |
| 25 Self-harm other means    | 25 Alcohol use disorders    | 10.9% (0.4 to 21.9%)                    | 2.1% (-7.6 to 12.2%)                      | 4.0% (-5.1 to 13.6%)                               |
| 26 Dermatitis               | 26 Dermatitis               |                                         |                                           |                                                    |
| 27 Alcohol use disorders    | 31 Neonatal preterm birth   |                                         |                                           |                                                    |
| 29 Osteoarthritis           | 56 HIV/AIDS other           |                                         |                                           |                                                    |

Legend:

- Communicable, maternal, neonatal and nutritional
- Non-communicable
- Injuries



Top 25 most-detailed causes of DALYs for 1990 and 2016 for both sexes in Delaware

| Leading causes 1990         | Leading causes 2016         | Mean % change number of DALYs 1990-2016 | Mean % change all-age DALY rate 1990-2016 | Mean % change age-standardized DALY rate 1990-2016 |
|-----------------------------|-----------------------------|-----------------------------------------|-------------------------------------------|----------------------------------------------------|
| 1 Ischemic heart disease    | 1 Ischemic heart disease    | -7.2% (-15.0 to 0.6%)                   | <b>-34.7% (-40.2 to -29.2%)</b>           | <b>-53.3% (-57.2 to -49.2%)</b>                    |
| 2 Lung cancer               | 2 Lung cancer               | <b>34.8% (21.0 to 49.5%)</b>            | -5.2% (-14.9 to 5.1%)                     | <b>-33.1% (-39.9 to -25.7%)</b>                    |
| 3 Low back pain             | 3 Diabetes                  | <b>95.7% (81.7 to 110.9%)</b>           | <b>37.6% (27.8 to 48.3%)</b>              | 4.5% (-3.1 to 12.6%)                               |
| 4 Diabetes                  | 4 COPD                      | <b>103.2% (87.8 to 121.3%)</b>          | <b>42.9% (32.1 to 55.7%)</b>              | 2.1% (-5.6 to 10.8%)                               |
| 5 Opioid use disorders      | 5 Opioid use disorders      | <b>69.0% (39.5 to 90.2%)</b>            | 18.8% (-1.9 to 33.8%)                     | <b>35.7% (11.8 to 53.2%)</b>                       |
| 6 COPD                      | 6 Low back pain             | <b>43.3% (28.4 to 59.8%)</b>            | 0.8% (-9.7 to 12.4%)                      | <b>-11.4% (-20.7 to -1.5%)</b>                     |
| 7 Motor vehicle road inj    | 7 Alzheimer disease         | <b>117.6% (90.9 to 145.2%)</b>          | <b>53.0% (34.3 to 72.4%)</b>              | -1.5% (-13.2 to 10.7%)                             |
| 8 Neonatal preterm birth    | 8 Other musculoskeletal     | <b>43.3% (30.0 to 57.2%)</b>            | 0.8% (-8.6 to 10.5%)                      | -5.3% (-13.2 to 3.0%)                              |
| 9 Major depression          | 9 Major depression          | <b>37.0% (27.7 to 47.7%)</b>            | -3.6% (-10.2 to 3.9%)                     | -0.5% (-6.9 to 6.8%)                               |
| 10 Other musculoskeletal    | 10 Migraine                 | <b>38.7% (34.0 to 43.5%)</b>            | -2.5% (-5.8 to 0.9%)                      | -0.4% (-3.9 to 2.8%)                               |
| 11 Migraine                 | 11 Neck pain                | <b>75.7% (57.4 to 94.6%)</b>            | <b>23.5% (10.7 to 36.9%)</b>              | 3.1% (-7.7 to 14.5%)                               |
| 12 Colorectal cancer        | 12 Falls                    | <b>121.7% (98.9 to 135.7%)</b>          | <b>55.9% (39.9 to 65.8%)</b>              | <b>20.4% (8.4 to 27.2%)</b>                        |
| 13 Anxiety disorders        | 13 Ischemic stroke          | <b>59.2% (45.6 to 73.7%)</b>            | <b>12.0% (2.4 to 22.2%)</b>               | <b>-22.9% (-29.3 to -15.8%)</b>                    |
| 14 Ischemic stroke          | 14 Anxiety disorders        | <b>44.5% (36.9 to 52.7%)</b>            | 1.6% (-3.7 to 7.4%)                       | 1.6% (-4.0 to 7.3%)                                |
| 15 Neck pain                | 15 Motor vehicle road inj   | -2.2% (-12.7 to 9.3%)                   | <b>-31.2% (-38.6 to -23.1%)</b>           | <b>-28.1% (-35.7 to -19.5%)</b>                    |
| 16 Alzheimer disease        | 16 Age-related hearing loss | <b>113.1% (104.5 to 123.0%)</b>         | <b>49.9% (43.8 to 56.8%)</b>              | <b>10.4% (6.3 to 15.6%)</b>                        |
| 17 HIV/AIDS other           | 17 Colorectal cancer        | <b>19.5% (6.7 to 33.2%)</b>             | <b>-16.0% (-24.9 to -6.4%)</b>            | <b>-37.7% (-44.1 to -30.6%)</b>                    |
| 18 Breast cancer            | 18 Lower respiratory infect | <b>42.9% (25.5 to 61.3%)</b>            | 0.5% (-11.7 to 13.4%)                     | <b>-24.6% (-33.2 to -15.4%)</b>                    |
| 19 Lower respiratory infect | 19 Breast cancer            | <b>24.5% (7.1 to 45.2%)</b>             | -12.4% (-24.7 to 2.1%)                    | <b>-33.0% (-42.0 to -22.2%)</b>                    |
| 20 Intracerebral hem        | 20 Neonatal preterm birth   | <b>-22.4% (-38.2 to -3.8%)</b>          | <b>-45.4% (-56.6 to -32.3%)</b>           | <b>-28.8% (-43.5 to -11.1%)</b>                    |
| 21 Falls                    | 21 Intracerebral hem        | <b>55.7% (40.8 to 72.8%)</b>            | 9.5% (-1.0 to 21.5%)                      | <b>-17.7% (-25.5 to -9.3%)</b>                     |
| 22 Other cardiovascular     | 22 Self-harm other means    | <b>70.9% (48.2 to 95.5%)</b>            | <b>20.2% (4.2 to 37.5%)</b>               | <b>29.2% (12.2 to 48.3%)</b>                       |
| 23 Age-related hearing loss | 23 Osteoarthritis           | <b>108.6% (99.6 to 118.7%)</b>          | <b>46.7% (40.4 to 53.8%)</b>              | 7.1% (2.3 to 12.6%)                                |
| 24 Self-harm other means    | 24 Diabetes CKD             | <b>145.3% (127.3 to 165.3%)</b>         | <b>72.5% (59.9 to 86.6%)</b>              | <b>30.1% (20.2 to 40.4%)</b>                       |
| 25 Acne vulgaris            | 25 Other cardiovascular     | <b>39.3% (28.6 to 51.7%)</b>            | -2.0% (-9.6 to 6.7%)                      | <b>-23.7% (-29.6 to -17.1%)</b>                    |
| 28 Osteoarthritis           | 29 Acne vulgaris            |                                         |                                           |                                                    |
| 33 Diabetes CKD             | 42 HIV/AIDS other           |                                         |                                           |                                                    |

Legend:

- Communicable, maternal, neonatal and nutritional
- Non-communicable
- Injuries

**Top 25 most-detailed causes of DALYs for 1990 and 2016 for both sexes in D.C.**

| Leading causes 1990           | Leading causes 2016           | Mean % change number of DALYs 1990-2016 | Mean % change all-age DALY rate 1990-2016 | Mean % change age-standardized DALY rate 1990-2016 |
|-------------------------------|-------------------------------|-----------------------------------------|-------------------------------------------|----------------------------------------------------|
| 1 Ischemic heart disease      | 1 Ischemic heart disease      | -39.1% (-45.8 to -31.6%)                | -44.5% (-50.6 to -37.6%)                  | -46.1% (-52.2 to -39.3%)                           |
| 2 HIV/AIDS other              | 2 Lung cancer                 | -39.0% (-46.8 to -30.4%)                | -44.4% (-51.5 to -36.5%)                  | -47.3% (-54.1 to -39.8%)                           |
| 3 Violence firearm            | 3 Diabetes                    | -19.4% (-27.5 to -11.4%)                | -26.5% (-33.9 to -19.2%)                  | -28.3% (-35.6 to -21.2%)                           |
| 4 Neonatal preterm birth      | 4 Alzheimer disease           | 14.9% (4.2 to 26.9%)                    | 4.7% (-5.0 to 15.7%)                      | 2.8% (-6.7 to 13.2%)                               |
| 5 Lung cancer                 | 5 Low back pain               | -20.7% (-29.5 to -10.7%)                | -27.7% (-35.8 to -18.6%)                  | -29.7% (-37.7 to -20.9%)                           |
| 6 Diabetes                    | 6 HIV/AIDS other              | -80.8% (-84.2 to -76.3%)                | -82.5% (-85.6 to -78.4%)                  | -81.8% (-85.1 to -77.5%)                           |
| 7 Low back pain               | 7 Other musculoskeletal       | -15.6% (-23.7 to -6.2%)                 | -23.1% (-30.5 to -14.5%)                  | -24.2% (-31.4 to -15.9%)                           |
| 8 Other musculoskeletal       | 8 Opioid use disorders        | 47.7% (23.3 to 68.6%)                   | 34.6% (12.4 to 53.7%)                     | 33.4% (10.3 to 52.8%)                              |
| 9 Lower respiratory infect    | 9 Migraine                    | 10.7% (6.4 to 15.3%)                    | 0.9% (-3.1 to 5.1%)                       | -2.6% (-6.4 to 1.2%)                               |
| 10 Colorectal cancer          | 10 Major depression           | 5.0% (-2.5 to 12.6%)                    | -4.3% (-11.1 to 2.6%)                     | -3.5% (-9.9 to 3.3%)                               |
| 11 Intracerebral hem          | 11 Anxiety disorders          | 13.8% (7.5 to 20.3%)                    | 3.7% (-2.0 to 9.7%)                       | 1.9% (-3.6 to 7.3%)                                |
| 12 Alcohol use disorders      | 12 Alcohol use disorders      | -14.6% (-23.5 to -5.3%)                 | -22.2% (-30.3 to -13.7%)                  | -24.2% (-32.1 to -16.1%)                           |
| 13 Breast cancer              | 13 Falls                      | 0.3% (-12.9 to 10.4%)                   | -8.6% (-20.6 to 0.6%)                     | -11.3% (-22.7 to -2.2%)                            |
| 14 Hypertensive heart disease | 14 Neonatal preterm birth     | -68.8% (-74.0 to -62.5%)                | -71.5% (-76.3 to -65.8%)                  | -65.5% (-71.2 to -58.5%)                           |
| 15 Ischemic stroke            | 15 Violence firearm           | -70.2% (-78.6 to -43.2%)                | -72.8% (-80.5 to -48.3%)                  | -72.9% (-80.6 to -47.5%)                           |
| 16 Alzheimer disease          | 16 COPD                       | -10.5% (-19.1 to -1.3%)                 | -18.4% (-26.3 to -10.0%)                  | -18.7% (-26.4 to -10.1%)                           |
| 17 Major depression           | 17 Hypertensive heart disease | -23.8% (-42.0 to -7.6%)                 | -30.5% (-47.1 to -15.8%)                  | -34.0% (-49.6 to -20.0%)                           |
| 18 COPD                       | 18 Colorectal cancer          | -37.8% (-46.2 to -28.6%)                | -43.3% (-50.9 to -34.9%)                  | -45.0% (-52.3 to -36.9%)                           |
| 19 Falls                      | 19 Neck pain                  | 9.5% (1.0 to 18.3%)                     | -0.2% (-8.0 to 7.8%)                      | -4.1% (-11.7 to 3.8%)                              |
| 20 Motor vehicle road inj     | 20 Acne vulgaris              | 3.1% (0.1 to 6.2%)                      | -6.0% (-8.8 to -3.2%)                     | -2.3% (-4.9 to 0.5%)                               |
| 21 Migraine                   | 21 Breast cancer              | -35.9% (-47.2 to -23.7%)                | -41.6% (-51.9 to -30.5%)                  | -44.6% (-54.5 to -33.8%)                           |
| 22 Anxiety disorders          | 22 Other drug use disorders   | 43.1% (18.2 to 77.9%)                   | 30.5% (7.7 to 62.2%)                      | 31.2% (7.5 to 62.8%)                               |
| 23 Self-harm other means      | 23 Age-related hearing loss   | 17.0% (13.3 to 21.1%)                   | 6.6% (3.3 to 10.4%)                       | 6.7% (3.4 to 10.6%)                                |
| 24 Other cardiovascular       | 24 Lower respiratory infect   | -52.6% (-59.8 to -44.2%)                | -56.8% (-63.3 to -49.2%)                  | -57.1% (-63.6 to -49.8%)                           |
| 25 Opioid use disorders       | 25 Intracerebral hem          | -49.4% (-55.7 to -42.3%)                | -53.8% (-59.6 to -47.4%)                  | -56.0% (-61.6 to -49.8%)                           |
| 28 Neck pain                  | 26 Ischemic stroke            |                                         |                                           |                                                    |
| 29 Acne vulgaris              | 30 Other cardiovascular       |                                         |                                           |                                                    |
| 35 Age-related hearing loss   | 31 Self-harm other means      |                                         |                                           |                                                    |
| 40 Other drug use disorders   | 39 Motor vehicle road inj     |                                         |                                           |                                                    |

**Legend:**

- Communicable, maternal, neonatal and nutritional
- Non-communicable
- Injuries

Top 25 most-detailed causes of DALYs for 1990 and 2016 for both sexes in Florida

| Leading causes 1990         | Leading causes 2016         | Mean % change number of DALYs 1990-2016 | Mean % change all-age DALY rate 1990-2016 | Mean % change age-standardized DALY rate 1990-2016 |
|-----------------------------|-----------------------------|-----------------------------------------|-------------------------------------------|----------------------------------------------------|
| 1 Ischemic heart disease    | 1 Ischemic heart disease    | -6.9% (-15.2 to 2.0%)                   | -40.7% (-46.0 to -35.0%)                  | -48.7% (-53.3 to -43.5%)                           |
| 2 Lung cancer               | 2 Lung cancer               | 26.6% (12.6 to 41.8%)                   | -19.3% (-28.3 to -9.7%)                   | -34.6% (-42.3 to -26.5%)                           |
| 3 Low back pain             | 3 COPD                      | 94.6% (79.9 to 111.3%)                  | 24.0% (14.6 to 34.6%)                     | 7.4% (-0.7 to 16.0%)                               |
| 4 COPD                      | 4 Diabetes                  | 123.7% (106.9 to 139.9%)                | 42.5% (31.8 to 52.9%)                     | 24.8% (15.3 to 33.6%)                              |
| 5 HIV/AIDS other            | 5 Low back pain             | 56.0% (37.9 to 74.5%)                   | -0.6% (-12.2 to 11.2%)                    | -10.4% (-21.1 to 0.9%)                             |
| 6 Diabetes                  | 6 Alzheimer disease         | 100.2% (81.9 to 118.7%)                 | 27.5% (15.9 to 39.3%)                     | 2.8% (-6.3 to 11.8%)                               |
| 7 Motor vehicle road inj    | 7 Opioid use disorders      | 143.5% (92.3 to 180.9%)                 | 55.1% (22.5 to 79.0%)                     | 70.6% (35.2 to 96.6%)                              |
| 8 Alzheimer disease         | 8 Neck pain                 | 94.6% (74.1 to 117.1%)                  | 24.0% (10.9 to 38.3%)                     | 7.8% (-4.1 to 20.1%)                               |
| 9 Other musculoskeletal     | 9 Other musculoskeletal     | 46.5% (33.2 to 61.3%)                   | -6.7% (-15.1 to 2.8%)                     | -8.7% (-16.5 to 0.4%)                              |
| 10 Ischemic stroke          | 10 Major depression         | 52.9% (43.0 to 63.5%)                   | -2.6% (-8.9 to 4.2%)                      | -1.4% (-8.0 to 5.3%)                               |
| 11 Major depression         | 11 Falls                    | 150.0% (115.0 to 168.5%)                | 59.3% (37.0 to 71.1%)                     | 26.8% (13.0 to 35.2%)                              |
| 12 Neck pain                | 12 Ischemic stroke          | 45.4% (33.4 to 58.2%)                   | -7.4% (-15.0 to 0.8%)                     | -20.5% (-26.9 to -13.7%)                           |
| 13 Migraine                 | 13 Migraine                 | 57.0% (51.3 to 62.5%)                   | 0.0% (-3.6 to 3.5%)                       | -1.5% (-5.0 to 2.1%)                               |
| 14 Colorectal cancer        | 14 Age-related hearing loss | 98.3% (89.5 to 107.8%)                  | 26.4% (20.7 to 32.4%)                     | 10.5% (6.2 to 15.6%)                               |
| 15 Anxiety disorders        | 15 Anxiety disorders        | 60.7% (52.2 to 69.0%)                   | 2.4% (-3.1 to 7.7%)                       | 1.4% (-4.0 to 7.0%)                                |
| 16 Opioid use disorders     | 16 Motor vehicle road inj   | -4.0% (-14.3 to 8.8%)                   | -38.9% (-45.4 to -30.7%)                  | -40.0% (-46.5 to -31.9%)                           |
| 17 Neonatal preterm birth   | 17 Colorectal cancer        | 35.7% (21.5 to 53.1%)                   | -13.5% (-22.6 to -2.5%)                   | -23.1% (-31.2 to -13.3%)                           |
| 18 Breast cancer            | 18 Intracerebral hem        | 52.6% (35.7 to 69.9%)                   | -2.8% (-13.5 to 8.2%)                     | -18.9% (-27.8 to -9.8%)                            |
| 19 Age-related hearing loss | 19 Breast cancer            | 25.3% (6.9 to 46.8%)                    | -20.2% (-31.9 to -6.4%)                   | -33.3% (-43.3 to -21.9%)                           |
| 20 Intracerebral hem        | 20 Osteoarthritis           | 94.0% (84.2 to 104.7%)                  | 23.6% (17.3 to 30.4%)                     | 5.3% (-0.3 to 11.1%)                               |
| 21 Falls                    | 21 Diabetes CKD             | 178.1% (155.0 to 204.9%)                | 77.2% (62.5 to 94.3%)                     | 57.5% (44.8 to 71.6%)                              |
| 22 Self-harm by firearm     | 22 Lower respiratory infect | 49.9% (31.7 to 70.2%)                   | -4.5% (-16.1 to 8.4%)                     | -20.4% (-29.3 to -10.6%)                           |
| 23 Violence firearm         | 23 Alcohol use disorders    | 48.1% (33.7 to 63.3%)                   | -5.7% (-14.8 to 4.0%)                     | -10.7% (-18.7 to -2.1%)                            |
| 24 Lower respiratory infect | 24 Self-harm other means    | 79.7% (43.0 to 110.7%)                  | 14.5% (-8.9 to 34.3%)                     | 16.0% (-7.5 to 36.7%)                              |
| 25 Alcohol use disorders    | 25 Pancreatic cancer        | 82.5% (60.9 to 105.1%)                  | 16.3% (2.5 to 30.6%)                      | -1.3% (-13.2 to 11.1%)                             |
| 27 Acne vulgaris            | 27 Acne vulgaris            |                                         |                                           |                                                    |
| 28 Osteoarthritis           | 30 Self-harm by firearm     |                                         |                                           |                                                    |
| 29 Self-harm other means    | 31 Neonatal preterm birth   |                                         |                                           |                                                    |
| 32 Pancreatic cancer        | 33 HIV/AIDS other           |                                         |                                           |                                                    |
| 41 Diabetes CKD             | 39 Violence firearm         |                                         |                                           |                                                    |

Legend:

- Communicable, maternal, neonatal and nutritional
- Non-communicable
- Injuries

**Top 25 most-detailed causes of DALYs for 1990 and 2016 for both sexes in Georgia**

| Leading causes 1990           | Leading causes 2016           | Mean % change number of DALYs 1990-2016 | Mean % change all-age DALY rate 1990-2016 | Mean % change age-standardized DALY rate 1990-2016 |
|-------------------------------|-------------------------------|-----------------------------------------|-------------------------------------------|----------------------------------------------------|
| 1 Ischemic heart disease      | 1 Ischemic heart disease      | 5.8% (-6.1 to 19.7%)                    | <b>-32.9% (-40.4 to -24.0%)</b>           | <b>-49.0% (-54.7 to -42.3%)</b>                    |
| 2 Lung cancer                 | 2 Lung cancer                 | <b>47.3% (30.0 to 66.6%)</b>            | -6.5% (-17.5 to 5.7%)                     | <b>-31.8% (-40.0 to -22.7%)</b>                    |
| 3 Motor vehicle road inj      | 3 COPD                        | <b>122.5% (103.0 to 144.8%)</b>         | <b>41.2% (28.8 to 55.3%)</b>              | 6.5% (-2.8 to 17.3%)                               |
| 4 Low back pain               | 4 Diabetes                    | <b>131.2% (113.3 to 149.1%)</b>         | <b>46.7% (35.3 to 58.0%)</b>              | <b>14.7% (5.9 to 23.6%)</b>                        |
| 5 COPD                        | 5 Low back pain               | <b>53.5% (34.9 to 73.0%)</b>            | -2.6% (-14.4 to 9.8%)                     | <b>-12.2% (-22.8 to -1.2%)</b>                     |
| 6 Diabetes                    | 6 Other musculoskeletal       | <b>57.9% (43.5 to 74.4%)</b>            | 0.2% (-9.0 to 10.6%)                      | -6.0% (-14.4 to 3.0%)                              |
| 7 Neonatal preterm birth      | 7 Major depression            | <b>50.6% (39.2 to 62.4%)</b>            | -4.4% (-11.6 to 3.0%)                     | -3.0% (-9.8 to 3.8%)                               |
| 8 HIV/AIDS other              | 8 Opioid use disorders        | <b>145.2% (97.1 to 182.7%)</b>          | <b>55.6% (25.1 to 79.4%)</b>              | <b>71.8% (38.7 to 98.5%)</b>                       |
| 9 Major depression            | 9 Motor vehicle road inj      | <b>-5.2% (-16.3 to 7.4%)</b>            | <b>-39.9% (-46.9 to -31.8%)</b>           | <b>-38.3% (-45.6 to -30.1%)</b>                    |
| 10 Other musculoskeletal      | 10 Migraine                   | <b>57.8% (52.6 to 63.0%)</b>            | 0.1% (-3.2 to 3.4%)                       | 1.1% (-2.1 to 4.3%)                                |
| 11 Ischemic stroke            | 11 Ischemic stroke            | <b>52.0% (37.6 to 65.6%)</b>            | -3.5% (-12.7 to 5.1%)                     | <b>-25.8% (-32.9 to -19.1%)</b>                    |
| 12 Migraine                   | 12 Neck pain                  | <b>93.7% (72.1 to 118.8%)</b>           | <b>22.9% (9.2 to 38.9%)</b>               | 4.0% (-7.6 to 17.4%)                               |
| 13 Anxiety disorders          | 13 Alzheimer disease          | <b>96.6% (77.9 to 117.2%)</b>           | <b>24.8% (12.9 to 37.8%)</b>              | -4.9% (-13.5 to 4.9%)                              |
| 14 Neck pain                  | 14 Anxiety disorders          | <b>61.1% (52.3 to 70.5%)</b>            | 2.2% (-3.4 to 8.2%)                       | 1.7% (-3.7 to 7.2%)                                |
| 15 Intracerebral hem          | 15 Lower respiratory infect   | <b>73.3% (51.0 to 96.5%)</b>            | 10.0% (-4.2 to 24.7%)                     | -11.0% (-22.4 to 0.7%)                             |
| 16 Lower respiratory infect   | 16 Falls                      | <b>107.9% (90.8 to 121.0%)</b>          | <b>31.9% (21.1 to 40.2%)</b>              | <b>9.3% (1.0 to 15.7%)</b>                         |
| 17 Alzheimer disease          | 17 Intracerebral hem          | <b>65.0% (44.9 to 87.8%)</b>            | 4.7% (-8.0 to 19.1%)                      | <b>-16.3% (-26.2 to -5.2%)</b>                     |
| 18 Self-harm by firearm       | 18 Colorectal cancer          | <b>78.7% (58.2 to 102.7%)</b>           | <b>13.4% (0.4 to 28.6%)</b>               | <b>-13.7% (-23.5 to -2.2%)</b>                     |
| 19 Colorectal cancer          | 19 Age-related hearing loss   | <b>120.3% (112.3 to 129.8%)</b>         | <b>39.8% (34.7 to 45.8%)</b>              | <b>11.7% (7.5 to 16.6%)</b>                        |
| 20 Violence firearm           | 20 Diabetes CKD               | <b>187.2% (159.3 to 218.3%)</b>         | <b>82.2% (64.6 to 102.0%)</b>             | <b>42.4% (29.2 to 56.7%)</b>                       |
| 21 Opioid use disorders       | 21 Breast cancer              | <b>47.9% (24.4 to 76.7%)</b>            | -6.1% (-21.1 to 12.1%)                    | <b>-26.8% (-38.5 to -12.6%)</b>                    |
| 22 Falls                      | 22 Neonatal preterm birth     | <b>-22.4% (-33.1 to -8.8%)</b>          | <b>-50.8% (-57.5 to -42.1%)</b>           | <b>-38.9% (-47.6 to -28.2%)</b>                    |
| 23 Breast cancer              | 23 Self-harm by firearm       | 21.0% (-2.2 to 45.0%)                   | <b>-23.2% (-37.9 to -8.0%)</b>            | <b>-22.7% (-37.0 to -7.5%)</b>                     |
| 24 Alcohol use disorders      | 24 Acne vulgaris              | <b>41.6% (36.3 to 47.0%)</b>            | <b>-10.1% (-13.5 to -6.7%)</b>            | -0.1% (-4.1 to 3.8%)                               |
| 25 Acne vulgaris              | 25 Hypertensive heart disease | <b>159.5% (69.1 to 233.0%)</b>          | <b>64.6% (7.3 to 111.3%)</b>              | 27.3% (-16.6 to 63.3%)                             |
| 26 Age-related hearing loss   | 26 Alcohol use disorders      |                                         |                                           |                                                    |
| 33 Diabetes CKD               | 29 Violence firearm           |                                         |                                           |                                                    |
| 37 Hypertensive heart disease | 34 HIV/AIDS other             |                                         |                                           |                                                    |

**Legend:**

- Communicable, maternal, neonatal and nutritional
- Non-communicable
- Injuries

Top 25 most-detailed causes of DALYs for 1990 and 2016 for both sexes in Hawaii

| Leading causes 1990         | Leading causes 2016         | Mean % change number of DALYs 1990-2016 | Mean % change all-age DALY rate 1990-2016 | Mean % change age-standardized DALY rate 1990-2016 |
|-----------------------------|-----------------------------|-----------------------------------------|-------------------------------------------|----------------------------------------------------|
| 1 Ischemic heart disease    | 1 Ischemic heart disease    | 5.2% (-3.5 to 15.0%)                    | -18.0% (-24.8 to -10.4%)                  | -43.7% (-48.6 to -38.3%)                           |
| 2 Low back pain             | 2 Alzheimer disease         | 162.2% (135.5 to 190.9%)                | 104.4% (83.6 to 126.8%)                   | 4.8% (-5.3 to 14.9%)                               |
| 3 Lung cancer               | 3 Diabetes                  | 94.7% (80.1 to 108.9%)                  | 51.8% (40.4 to 62.9%)                     | 13.2% (4.7 to 21.6%)                               |
| 4 Major depression          | 4 Lung cancer               | 40.5% (26.9 to 55.9%)                   | 9.5% (-1.0 to 21.5%)                      | -22.3% (-29.7 to -14.1%)                           |
| 5 Diabetes                  | 5 Low back pain             | 16.0% (4.2 to 29.5%)                    | -9.6% (-18.8 to 1.0%)                     | -20.6% (-28.6 to -11.7%)                           |
| 6 Migraine                  | 6 Major depression          | 27.7% (19.5 to 36.7%)                   | -0.4% (-6.9 to 6.6%)                      | 3.1% (-3.5 to 10.2%)                               |
| 7 Other musculoskeletal     | 7 COPD                      | 82.0% (69.0 to 96.4%)                   | 41.9% (31.7 to 53.1%)                     | -1.7% (-8.5 to 6.0%)                               |
| 8 Anxiety disorders         | 8 Migraine                  | 23.0% (18.7 to 27.4%)                   | -4.1% (-7.5 to -0.7%)                     | -2.5% (-5.8 to 1.0%)                               |
| 9 Alzheimer disease         | 9 Falls                     | 115.6% (97.4 to 129.2%)                 | 68.0% (53.8 to 78.7%)                     | 27.5% (16.8 to 34.5%)                              |
| 10 Motor vehicle road inj   | 10 Other musculoskeletal    | 24.2% (10.5 to 37.5%)                   | -3.2% (-13.8 to 7.2%)                     | -9.1% (-18.8 to 0.0%)                              |
| 11 Neonatal preterm birth   | 11 Ischemic stroke          | 57.0% (44.6 to 69.8%)                   | 22.4% (12.7 to 32.3%)                     | -24.9% (-30.9 to -18.5%)                           |
| 12 Ischemic stroke          | 12 Anxiety disorders        | 29.9% (23.2 to 36.9%)                   | 1.3% (-3.9 to 6.7%)                       | 1.4% (-4.1 to 6.7%)                                |
| 13 COPD                     | 13 Neck pain                | 51.1% (40.1 to 62.8%)                   | 17.8% (9.2 to 26.9%)                      | -0.6% (-7.4 to 6.3%)                               |
| 14 Neck pain                | 14 Age-related hearing loss | 101.0% (91.9 to 110.9%)                 | 56.7% (49.6 to 64.4%)                     | 9.3% (5.5 to 13.9%)                                |
| 15 Self-harm other means    | 15 Self-harm other means    | 44.8% (25.8 to 64.6%)                   | 12.8% (-1.9 to 28.3%)                     | 18.4% (2.4 to 35.2%)                               |
| 16 Colorectal cancer        | 16 Colorectal cancer        | 49.2% (33.9 to 66.2%)                   | 16.3% (4.4 to 29.6%)                      | -15.5% (-24.0 to -5.8%)                            |
| 17 Intracerebral hem        | 17 Opioid use disorders     | 125.1% (87.3 to 158.0%)                 | 75.4% (46.0 to 101.1%)                    | 92.1% (59.9 to 119.7%)                             |
| 18 Acne vulgaris            | 18 Intracerebral hem        | 35.5% (22.1 to 49.7%)                   | 5.6% (-4.8 to 16.7%)                      | -21.2% (-29.2 to -12.8%)                           |
| 19 Lower respiratory infect | 19 Lower respiratory infect | 44.1% (28.3 to 60.3%)                   | 12.3% (0.0 to 24.9%)                      | -20.4% (-28.7 to -11.8%)                           |
| 20 Falls                    | 20 Motor vehicle road inj   | -17.4% (-26.4 to -6.2%)                 | -35.6% (-42.6 to -26.8%)                  | -35.1% (-42.0 to -26.4%)                           |
| 21 HIV/AIDS other           | 21 Acne vulgaris            | 10.0% (6.4 to 14.1%)                    | -14.2% (-17.0 to -11.1%)                  | -2.9% (-5.9 to 0.5%)                               |
| 22 Age-related hearing loss | 22 Diabetes CKD             | 160.4% (140.6 to 181.8%)                | 103.0% (87.6 to 119.7%)                   | 49.7% (39.0 to 62.1%)                              |
| 23 Dermatitis               | 23 Dermatitis               | 24.6% (20.5 to 28.8%)                   | -2.9% (-6.0 to 0.4%)                      | 0.9% (-2.2 to 4.3%)                                |
| 24 Alcohol use disorders    | 24 Neonatal preterm birth   | -22.8% (-34.6 to -9.0%)                 | -39.8% (-49.0 to -29.1%)                  | -24.0% (-35.5 to -10.9%)                           |
| 25 Asthma                   | 25 Breast cancer            | 31.2% (14.5 to 52.5%)                   | 2.3% (-10.7 to 18.9%)                     | -21.4% (-31.6 to -8.4%)                            |
| 26 Breast cancer            | 26 Alcohol use disorders    |                                         |                                           |                                                    |
| 27 Opioid use disorders     | 29 Asthma                   |                                         |                                           |                                                    |
| 43 Diabetes CKD             | 77 HIV/AIDS other           |                                         |                                           |                                                    |

Legend:

- Communicable, maternal, neonatal and nutritional
- Non-communicable
- Injuries

Top 25 most-detailed causes of DALYs for 1990 and 2016 for both sexes in Idaho

| Leading causes 1990         | Leading causes 2016         | Mean % change number of DALYs 1990-2016 | Mean % change all-age DALY rate 1990-2016 | Mean % change age-standardized DALY rate 1990-2016 |
|-----------------------------|-----------------------------|-----------------------------------------|-------------------------------------------|----------------------------------------------------|
| 1 Ischemic heart disease    | 1 Ischemic heart disease    | 10.2% (-2.4 to 24.4%)                   | <b>-33.5% (-41.1 to -25.0%)</b>           | <b>-47.6% (-53.9 to -40.6%)</b>                    |
| 2 Low back pain             | 2 COPD                      | <b>126.4% (103.6 to 149.9%)</b>         | <b>36.6% (22.8 to 50.7%)</b>              | 7.1% (-3.8 to 17.8%)                               |
| 3 Motor vehicle road inj    | 3 Diabetes                  | <b>151.1% (131.8 to 172.4%)</b>         | <b>51.5% (39.8 to 64.3%)</b>              | <b>21.2% (11.9 to 31.1%)</b>                       |
| 4 Lung cancer               | 4 Low back pain             | <b>64.8% (45.9 to 84.0%)</b>            | -0.6% (-12.0 to 11.0%)                    | <b>-11.6% (-22.4 to -0.9%)</b>                     |
| 5 COPD                      | 5 Lung cancer               | <b>73.5% (52.3 to 97.7%)</b>            | 4.6% (-8.2 to 19.2%)                      | <b>-21.5% (-30.9 to -10.7%)</b>                    |
| 6 Major depression          | 6 Major depression          | <b>69.0% (59.1 to 79.2%)</b>            | 1.9% (-4.0 to 8.1%)                       | 1.7% (-4.1 to 8.0%)                                |
| 7 Other musculoskeletal     | 7 Other musculoskeletal     | <b>76.2% (61.3 to 92.7%)</b>            | 6.3% (-2.7 to 16.2%)                      | -0.7% (-9.4 to 8.2%)                               |
| 8 Diabetes                  | 8 Alzheimer disease         | <b>122.7% (95.6 to 152.3%)</b>          | <b>34.3% (18.0 to 52.2%)</b>              | 5.1% (-7.2 to 18.9%)                               |
| 9 Migraine                  | 9 Opioid use disorders      | <b>88.6% (62.1 to 113.7%)</b>           | 13.8% (-2.2 to 28.9%)                     | <b>18.9% (1.7 to 34.8%)</b>                        |
| 10 Opioid use disorders     | 10 Falls                    | <b>160.7% (134.4 to 180.3%)</b>         | <b>57.2% (41.4 to 69.1%)</b>              | <b>28.6% (16.8 to 37.6%)</b>                       |
| 11 Ischemic stroke          | 11 Motor vehicle road inj   | 5.4% (-7.3 to 19.8%)                    | <b>-36.4% (-44.1 to -27.7%)</b>           | <b>-36.8% (-44.5 to -28.1%)</b>                    |
| 12 Alzheimer disease        | 12 Migraine                 | <b>63.0% (57.9 to 68.3%)</b>            | -1.7% (-4.8 to 1.5%)                      | -2.7% (-5.8 to 0.3%)                               |
| 13 Anxiety disorders        | 13 Ischemic stroke          | <b>72.1% (54.6 to 89.8%)</b>            | 3.8% (-6.7 to 14.5%)                      | <b>-17.7% (-26.0 to -9.3%)</b>                     |
| 14 Neck pain                | 14 Neck pain                | <b>99.1% (78.3 to 122.4%)</b>           | <b>20.1% (7.6 to 34.2%)</b>               | 1.1% (-9.8 to 13.3%)                               |
| 15 Self-harm by firearm     | 15 Anxiety disorders        | <b>70.5% (61.2 to 79.8%)</b>            | 2.8% (-2.8 to 8.4%)                       | 1.6% (-4.0 to 6.9%)                                |
| 16 Falls                    | 16 Age-related hearing loss | <b>126.5% (116.5 to 137.5%)</b>         | <b>36.6% (30.6 to 43.3%)</b>              | <b>11.3% (6.7 to 16.6%)</b>                        |
| 17 Colorectal cancer        | 17 Self-harm by firearm     | <b>58.6% (25.6 to 92.3%)</b>            | -4.4% (-24.2 to 16.0%)                    | -6.1% (-25.5 to 14.0%)                             |
| 18 Neonatal preterm birth   | 18 Colorectal cancer        | <b>66.3% (43.9 to 91.0%)</b>            | 0.3% (-13.2 to 15.2%)                     | <b>-20.4% (-31.1 to -8.4%)</b>                     |
| 19 Breast cancer            | 19 Intracerebral hem        | <b>98.1% (73.0 to 126.3%)</b>           | <b>19.5% (4.3 to 36.5%)</b>               | -2.9% (-15.5 to 10.8%)                             |
| 20 Age-related hearing loss | 20 Self-harm other means    | <b>134.4% (92.5 to 178.5%)</b>          | <b>41.4% (16.1 to 68.0%)</b>              | <b>44.1% (18.4 to 71.5%)</b>                       |
| 21 Lower respiratory infect | 21 Breast cancer            | <b>52.6% (26.7 to 82.4%)</b>            | -8.0% (-23.6 to 10.0%)                    | <b>-27.2% (-39.8 to -12.8%)</b>                    |
| 22 Acne vulgaris            | 22 Lower respiratory infect | <b>54.5% (33.2 to 78.2%)</b>            | -6.8% (-19.7 to 7.5%)                     | <b>-23.5% (-33.4 to -11.8%)</b>                    |
| 23 Other cardiovascular     | 23 Alcohol use disorders    | <b>87.1% (68.6 to 107.0%)</b>           | <b>12.9% (1.7 to 24.8%)</b>               | 8.0% (-2.3 to 18.9%)                               |
| 24 Intracerebral hem        | 24 Other cardiovascular     | <b>68.8% (52.7 to 86.1%)</b>            | 1.8% (-7.9 to 12.3%)                      | <b>-16.2% (-24.3 to -7.3%)</b>                     |
| 25 Alcohol use disorders    | 25 Osteoarthritis           | <b>131.5% (121.5 to 142.0%)</b>         | <b>39.6% (33.6 to 46.0%)</b>              | <b>9.3% (4.4 to 14.5%)</b>                         |
| 27 Self-harm other means    | 26 Acne vulgaris            |                                         |                                           |                                                    |
| 32 Osteoarthritis           | 27 Neonatal preterm birth   |                                         |                                           |                                                    |

Legend:

- Communicable, maternal, neonatal and nutritional
- Non-communicable
- Injuries

Top 25 most-detailed causes of DALYs for 1990 and 2016 for both sexes in Illinois

| Leading causes 1990         | Leading causes 2016         | Mean % change number of DALYs 1990-2016 | Mean % change all-age DALY rate 1990-2016 | Mean % change age-standardized DALY rate 1990-2016 |
|-----------------------------|-----------------------------|-----------------------------------------|-------------------------------------------|----------------------------------------------------|
| 1 Ischemic heart disease    | 1 Ischemic heart disease    | -34.9% (-39.7 to -29.5%)                | -41.7% (-46.0 to -36.8%)                  | -52.9% (-56.4 to -48.9%)                           |
| 2 Lung cancer               | 2 Lung cancer               | -2.8% (-12.3 to 7.1%)                   | -12.9% (-21.4 to -4.0%)                   | -32.5% (-39.0 to -25.6%)                           |
| 3 Low back pain             | 3 COPD                      | 41.5% (31.8 to 52.4%)                   | 26.7% (18.1 to 36.5%)                     | 2.6% (-4.4 to 10.5%)                               |
| 4 Diabetes                  | 4 Diabetes                  | 38.0% (27.6 to 47.7%)                   | 23.6% (14.3 to 32.3%)                     | 1.7% (-6.0 to 8.9%)                                |
| 5 COPD                      | 5 Low back pain             | 6.9% (-5.9 to 20.2%)                    | -4.2% (-15.7 to 7.7%)                     | -11.6% (-22.3 to -0.2%)                            |
| 6 Motor vehicle road inj    | 6 Alzheimer disease         | 41.7% (30.2 to 54.3%)                   | 27.0% (16.7 to 38.3%)                     | -0.6% (-8.2 to 7.8%)                               |
| 7 Neonatal preterm birth    | 7 Opioid use disorders      | 61.1% (31.9 to 83.1%)                   | 44.3% (18.1 to 64.1%)                     | 58.7% (29.8 to 80.6%)                              |
| 8 Other musculoskeletal     | 8 Other musculoskeletal     | 14.3% (3.8 to 25.5%)                    | 2.4% (-7.0 to 12.4%)                      | -2.2% (-10.1 to 7.2%)                              |
| 9 Major depression          | 9 Neck pain                 | 33.4% (18.9 to 48.8%)                   | 19.5% (6.5 to 33.4%)                      | 4.3% (-7.3 to 16.7%)                               |
| 10 Ischemic stroke          | 10 Major depression         | 7.3% (-0.4 to 16.1%)                    | -3.8% (-10.8 to 4.0%)                     | -2.5% (-9.2 to 4.8%)                               |
| 11 Alzheimer disease        | 11 Migraine                 | 10.5% (6.3 to 14.6%)                    | -1.0% (-4.7 to 2.7%)                      | -1.8% (-5.6 to 1.8%)                               |
| 12 Migraine                 | 12 Ischemic stroke          | 5.9% (-2.2 to 14.7%)                    | -5.2% (-12.4 to 2.8%)                     | -23.3% (-29.1 to -16.9%)                           |
| 13 Colorectal cancer        | 13 Anxiety disorders        | 14.9% (8.6 to 21.1%)                    | 2.9% (-2.7 to 8.5%)                       | 1.5% (-3.8 to 7.0%)                                |
| 14 Anxiety disorders        | 14 Falls                    | 48.9% (35.6 to 57.3%)                   | 33.4% (21.5 to 41.0%)                     | 11.1% (2.1 to 16.8%)                               |
| 15 Neck pain                | 15 Colorectal cancer        | -8.2% (-17.1 to 1.4%)                   | -17.7% (-25.8 to -9.1%)                   | -33.1% (-39.6 to -25.9%)                           |
| 16 Opioid use disorders     | 16 Age-related hearing loss | 46.2% (41.0 to 51.9%)                   | 31.0% (26.3 to 36.1%)                     | 9.7% (5.8 to 14.2%)                                |
| 17 Breast cancer            | 17 Lower respiratory infect | 7.0% (-4.7 to 19.5%)                    | -4.1% (-14.6 to 7.1%)                     | -20.9% (-28.9 to -12.2%)                           |
| 18 Lower respiratory infect | 18 Motor vehicle road inj   | -34.0% (-40.4 to -26.9%)                | -40.9% (-46.6 to -34.5%)                  | -40.5% (-46.2 to -34.1%)                           |
| 19 Intracerebral hem        | 19 Intracerebral hem        | 1.7% (-7.9 to 11.5%)                    | -8.9% (-17.4 to -0.1%)                    | -25.3% (-32.4 to -18.1%)                           |
| 20 Falls                    | 20 Breast cancer            | -14.8% (-25.2 to -3.4%)                 | -23.7% (-33.0 to -13.5%)                  | -39.0% (-46.4 to -30.7%)                           |
| 21 Violence firearm         | 21 Diabetes CKD             | 77.9% (64.5 to 93.1%)                   | 59.4% (47.4 to 73.0%)                     | 31.5% (22.0 to 42.2%)                              |
| 22 HIV/AIDS other           | 22 Neonatal preterm birth   | -44.5% (-52.0 to -36.9%)                | -50.3% (-57.0 to -43.4%)                  | -37.3% (-45.8 to -29.2%)                           |
| 23 Age-related hearing loss | 23 Self-harm other means    | 14.8% (-7.4 to 31.6%)                   | 2.8% (-17.0 to 17.9%)                     | 6.3% (-13.8 to 22.1%)                              |
| 24 Acne vulgaris            | 24 Osteoarthritis           | 55.8% (46.7 to 65.3%)                   | 39.6% (31.5 to 48.1%)                     | 12.4% (5.6 to 19.3%)                               |
| 25 Other cardiovascular     | 25 Acne vulgaris            | 2.5% (-1.4 to 6.5%)                     | -8.1% (-11.6 to -4.6%)                    | -0.1% (-3.8 to 3.7%)                               |
| 26 Self-harm other means    | 26 Other cardiovascular     |                                         |                                           |                                                    |
| 34 Osteoarthritis           | 30 Violence firearm         |                                         |                                           |                                                    |
| 35 Diabetes CKD             | 64 HIV/AIDS other           |                                         |                                           |                                                    |

Legend:

- Communicable, maternal, neonatal and nutritional
- Non-communicable
- Injuries

**Top 25 most-detailed causes of DALYs for 1990 and 2016 for both sexes in Indiana**

| Leading causes 1990         | Leading causes 2016         | Mean % change number of DALYs 1990-2016 | Mean % change all-age DALY rate 1990-2016 | Mean % change age-standardized DALY rate 1990-2016 |
|-----------------------------|-----------------------------|-----------------------------------------|-------------------------------------------|----------------------------------------------------|
| 1 Ischemic heart disease    | 1 Ischemic heart disease    | -17.1% (-26.3 to -6.8%)                 | -30.4% (-38.1 to -21.8%)                  | -42.7% (-49.2 to -35.6%)                           |
| 2 Lung cancer               | 2 COPD                      | 89.7% (72.5 to 108.7%)                  | 59.2% (44.8 to 75.2%)                     | 28.8% (17.5 to 41.7%)                              |
| 3 Low back pain             | 3 Lung cancer               | 21.7% (5.5 to 38.5%)                    | 2.2% (-11.4 to 16.3%)                     | -19.8% (-30.5 to -8.5%)                            |
| 4 COPD                      | 4 Diabetes                  | 68.5% (55.6 to 83.2%)                   | 41.4% (30.6 to 53.8%)                     | 17.3% (8.3 to 27.6%)                               |
| 5 Motor vehicle road inj    | 5 Low back pain             | 22.0% (7.5 to 36.8%)                    | 2.4% (-9.7 to 14.8%)                      | -4.5% (-16.2 to 7.3%)                              |
| 6 Diabetes                  | 6 Alzheimer disease         | 66.6% (47.2 to 86.3%)                   | 39.9% (23.5 to 56.4%)                     | 11.1% (-1.6 to 24.2%)                              |
| 7 Major depression          | 7 Opioid use disorders      | 65.3% (32.3 to 92.4%)                   | 38.7% (11.1 to 61.5%)                     | 54.0% (23.0 to 78.9%)                              |
| 8 Other musculoskeletal     | 8 Major depression          | 19.5% (12.3 to 27.7%)                   | 0.3% (-5.7 to 7.2%)                       | 2.5% (-3.6 to 8.9%)                                |
| 9 Migraine                  | 9 Other musculoskeletal     | 25.1% (13.4 to 36.7%)                   | 5.0% (-4.8 to 14.7%)                      | 1.1% (-7.5 to 9.8%)                                |
| 10 Ischemic stroke          | 10 Neck pain                | 46.6% (30.3 to 64.1%)                   | 23.1% (9.3 to 37.7%)                      | 8.0% (-4.1 to 21.3%)                               |
| 11 Alzheimer disease        | 11 Migraine                 | 17.9% (13.7 to 22.2%)                   | -1.0% (-4.6 to 2.6%)                      | 0.3% (-3.2 to 3.8%)                                |
| 12 Opioid use disorders     | 12 Ischemic stroke          | 16.0% (5.7 to 28.1%)                    | -2.7% (-11.3 to 7.5%)                     | -20.3% (-27.4 to -12.0%)                           |
| 13 Colorectal cancer        | 13 Motor vehicle road inj   | -17.2% (-28.0 to -5.9%)                 | -30.5% (-39.6 to -21.0%)                  | -28.9% (-38.2 to -19.0%)                           |
| 14 Neck pain                | 14 Falls                    | 84.9% (67.1 to 98.3%)                   | 55.2% (40.2 to 66.4%)                     | 29.9% (18.7 to 38.5%)                              |
| 15 Anxiety disorders        | 15 Anxiety disorders        | 20.2% (13.8 to 27.2%)                   | 0.9% (-4.5 to 6.8%)                       | 1.0% (-4.5 to 6.4%)                                |
| 16 Neonatal preterm birth   | 16 Colorectal cancer        | 11.9% (-3.5 to 26.7%)                   | -6.1% (-19.0 to 6.3%)                     | -22.7% (-33.3 to -12.5%)                           |
| 17 Breast cancer            | 17 Age-related hearing loss | 58.0% (51.8 to 65.1%)                   | 32.6% (27.4 to 38.6%)                     | 11.1% (6.9 to 16.3%)                               |
| 18 Lower respiratory infect | 18 Intracerebral hem        | 35.8% (19.5 to 53.1%)                   | 14.0% (0.3 to 28.5%)                      | -4.3% (-16.0 to 7.9%)                              |
| 19 Intracerebral hem        | 19 Lower respiratory infect | 34.7% (16.3 to 54.5%)                   | 13.1% (-2.4 to 29.7%)                     | -5.1% (-17.4 to 8.4%)                              |
| 20 Age-related hearing loss | 20 Diabetes CKD             | 124.6% (103.6 to 149.1%)                | 88.6% (70.9 to 109.1%)                    | 57.8% (43.2 to 75.0%)                              |
| 21 Falls                    | 21 Breast cancer            | 3.4% (-13.6 to 23.9%)                   | -13.2% (-27.4 to 4.0%)                    | -29.0% (-40.7 to -14.5%)                           |
| 22 Self-harm by firearm     | 22 Self-harm other means    | 66.4% (38.4 to 97.4%)                   | 39.7% (16.2 to 65.7%)                     | 48.5% (23.3 to 77.2%)                              |
| 23 Acne vulgaris            | 23 Other cardiovascular     | 33.6% (20.7 to 47.3%)                   | 12.2% (1.3 to 23.7%)                      | -3.5% (-13.2 to 6.0%)                              |
| 24 Other cardiovascular     | 24 Self-harm by firearm     | 16.3% (-4.9 to 39.2%)                   | -2.4% (-20.2 to 16.9%)                    | 0.1% (-18.3 to 20.4%)                              |
| 25 Self-harm other means    | 25 Neonatal preterm birth   | -20.0% (-30.5 to -8.4%)                 | -32.9% (-41.6 to -23.1%)                  | -22.0% (-32.3 to -10.8%)                           |
| 32 Diabetes CKD             | 29 Acne vulgaris            |                                         |                                           |                                                    |

**Legend:**

- Communicable, maternal, neonatal and nutritional
- Non-communicable
- Injuries



Top 25 most-detailed causes of DALYs for 1990 and 2016 for both sexes in Iowa

| Leading causes 1990         | Leading causes 2016         | Mean % change number of DALYs 1990-2016 | Mean % change all-age DALY rate 1990-2016 | Mean % change age-standardized DALY rate 1990-2016 |
|-----------------------------|-----------------------------|-----------------------------------------|-------------------------------------------|----------------------------------------------------|
| 1 Ischemic heart disease    | 1 Ischemic heart disease    | -31.4% (-37.4 to -24.3%)                | -39.1% (-44.5 to -32.9%)                  | -45.7% (-50.7 to -39.9%)                           |
| 2 Lung cancer               | 2 Lung cancer               | 16.8% (5.1 to 30.2%)                    | 3.6% (-6.8 to 15.5%)                      | -14.1% (-22.7 to -4.1%)                            |
| 3 Low back pain             | 3 COPD                      | 54.6% (42.1 to 68.5%)                   | 37.2% (26.0 to 49.4%)                     | 19.9% (10.3 to 30.4%)                              |
| 4 COPD                      | 4 Low back pain             | 17.6% (6.4 to 28.6%)                    | 4.3% (-5.6 to 14.1%)                      | 1.8% (-8.5 to 11.6%)                               |
| 5 Motor vehicle road inj    | 5 Diabetes                  | 54.2% (42.8 to 65.5%)                   | 36.8% (26.7 to 46.8%)                     | 20.8% (11.7 to 29.6%)                              |
| 6 Alzheimer disease         | 6 Alzheimer disease         | 21.6% (7.9 to 35.6%)                    | 7.9% (-4.2 to 20.2%)                      | -5.0% (-15.0 to 5.5%)                              |
| 7 Other musculoskeletal     | 7 Other musculoskeletal     | 19.0% (9.5 to 29.2%)                    | 5.5% (-2.8 to 14.6%)                      | 3.9% (-4.4 to 12.7%)                               |
| 8 Ischemic stroke           | 8 Falls                     | 65.4% (46.5 to 77.5%)                   | 46.7% (29.9 to 57.5%)                     | 25.1% (12.7 to 34.0%)                              |
| 9 Diabetes                  | 9 Ischemic stroke           | 5.4% (-3.4 to 14.9%)                    | -6.5% (-14.3 to 1.9%)                     | -15.6% (-22.7 to -8.1%)                            |
| 10 Major depression         | 10 Major depression         | 13.0% (5.5 to 20.8%)                    | 0.3% (-6.4 to 7.2%)                       | 1.6% (-5.0 to 8.7%)                                |
| 11 Migraine                 | 11 Migraine                 | 9.2% (5.4 to 13.1%)                     | -3.1% (-6.5 to 0.3%)                      | -2.9% (-6.3 to 0.6%)                               |
| 12 Colorectal cancer        | 12 Anxiety disorders        | 14.3% (8.4 to 20.4%)                    | 1.4% (-3.8 to 6.8%)                       | 1.0% (-4.4 to 6.3%)                                |
| 13 Anxiety disorders        | 13 Motor vehicle road inj   | -24.2% (-31.8 to -15.7%)                | -32.8% (-39.5 to -25.2%)                  | -34.8% (-41.4 to -27.4%)                           |
| 14 Neck pain                | 14 Age-related hearing loss | 37.3% (32.2 to 43.0%)                   | 21.8% (17.3 to 26.8%)                     | 10.0% (6.1 to 14.5%)                               |
| 15 Falls                    | 15 Colorectal cancer        | 2.2% (-8.0 to 13.6%)                    | -9.3% (-18.4 to 0.8%)                     | -20.4% (-28.4 to -11.4%)                           |
| 16 Lower respiratory infect | 16 Neck pain                | 14.2% (1.7 to 28.0%)                    | 1.3% (-9.8 to 13.5%)                      | -8.4% (-19.8 to 3.0%)                              |
| 17 Breast cancer            | 17 Lower respiratory infect | 6.7% (-5.8 to 19.9%)                    | -5.4% (-16.4 to 6.3%)                     | -16.3% (-25.7 to -6.1%)                            |
| 18 Age-related hearing loss | 18 Opioid use disorders     | 120.1% (87.5 to 153.2%)                 | 95.2% (66.4 to 124.6%)                    | 111.5% (80.4 to 143.4%)                            |
| 19 Intracerebral hem        | 19 Intracerebral hem        | 24.9% (11.5 to 38.7%)                   | 10.8% (-1.1 to 23.0%)                     | -3.2% (-13.6 to 7.5%)                              |
| 20 Neonatal preterm birth   | 20 Breast cancer            | -8.8% (-20.9 to 5.2%)                   | -19.1% (-29.9 to -6.7%)                   | -31.1% (-40.4 to -20.5%)                           |
| 21 Other cardiovascular     | 21 Self-harm other means    | 50.5% (27.2 to 74.8%)                   | 33.5% (12.8 to 55.1%)                     | 38.2% (16.0 to 61.4%)                              |
| 22 Acne vulgaris            | 22 Other cardiovascular     | 0.4% (-8.3 to 10.3%)                    | -11.0% (-18.6 to -2.2%)                   | -20.6% (-27.2 to -12.8%)                           |
| 23 Self-harm by firearm     | 23 Alcohol use disorders    | 33.3% (21.1 to 48.4%)                   | 18.2% (7.4 to 31.6%)                      | 15.3% (5.3 to 27.9%)                               |
| 24 Self-harm other means    | 24 Osteoarthritis           | 38.5% (32.2 to 44.5%)                   | 22.8% (17.2 to 28.2%)                     | 6.4% (1.4 to 11.1%)                                |
| 25 Alcohol use disorders    | 25 Acne vulgaris            | 1.4% (-3.0 to 5.6%)                     | -10.1% (-13.9 to -6.3%)                   | -4.0% (-8.1 to 0.2%)                               |
| 26 Osteoarthritis           | 30 Self-harm by firearm     |                                         |                                           |                                                    |
| 31 Opioid use disorders     | 32 Neonatal preterm birth   |                                         |                                           |                                                    |

Legend:

- Communicable, maternal, neonatal and nutritional
- Non-communicable
- Injuries

Top 25 most-detailed causes of DALYs for 1990 and 2016 for both sexes in Kansas

| Leading causes 1990         | Leading causes 2016         | Mean % change number of DALYs 1990-2016 | Mean % change all-age DALY rate 1990-2016 | Mean % change age-standardized DALY rate 1990-2016 |
|-----------------------------|-----------------------------|-----------------------------------------|-------------------------------------------|----------------------------------------------------|
| 1 Ischemic heart disease    | 1 Ischemic heart disease    | -25.0% (-33.2 to -15.0%)                | -35.9% (-43.0 to -27.4%)                  | -44.2% (-50.8 to -36.2%)                           |
| 2 Lung cancer               | 2 COPD                      | 63.6% (46.5 to 80.6%)                   | 39.7% (25.1 to 54.2%)                     | 19.7% (7.5 to 32.4%)                               |
| 3 Low back pain             | 3 Lung cancer               | 19.8% (4.9 to 37.8%)                    | 2.3% (-10.4 to 17.6%)                     | -17.2% (-27.6 to -4.7%)                            |
| 4 COPD                      | 4 Low back pain             | 16.3% (3.6 to 29.2%)                    | -0.7% (-11.6 to 10.3%)                    | -5.8% (-17.0 to 5.5%)                              |
| 5 Motor vehicle road inj    | 5 Diabetes                  | 63.1% (50.9 to 76.8%)                   | 39.3% (28.8 to 51.0%)                     | 20.5% (11.3 to 30.6%)                              |
| 6 Diabetes                  | 6 Alzheimer disease         | 35.3% (20.2 to 51.7%)                   | 15.6% (2.7 to 29.6%)                      | 1.4% (-9.5 to 13.2%)                               |
| 7 Major depression          | 7 Major depression          | 19.2% (11.7 to 26.8%)                   | 1.8% (-4.6 to 8.3%)                       | 3.1% (-3.2 to 9.5%)                                |
| 8 Alzheimer disease         | 8 Other musculoskeletal     | 18.9% (7.5 to 30.3%)                    | 1.5% (-8.2 to 11.3%)                      | -2.0% (-11.3 to 7.5%)                              |
| 9 Other musculoskeletal     | 9 Motor vehicle road inj    | -11.0% (-21.9 to 1.1%)                  | -24.0% (-33.3 to -13.7%)                  | -25.3% (-34.4 to -14.6%)                           |
| 10 Ischemic stroke          | 10 Ischemic stroke          | 18.2% (6.4 to 30.2%)                    | 1.0% (-9.1 to 11.2%)                      | -11.0% (-19.9 to -1.8%)                            |
| 11 Migraine                 | 11 Falls                    | 81.1% (58.9 to 94.2%)                   | 54.6% (35.7 to 65.9%)                     | 34.3% (19.5 to 43.8%)                              |
| 12 Anxiety disorders        | 12 Migraine                 | 12.7% (8.9 to 17.1%)                    | -3.7% (-7.0 to 0.0%)                      | -3.4% (-6.6 to 0.4%)                               |
| 13 Colorectal cancer        | 13 Anxiety disorders        | 19.2% (13.0 to 25.4%)                   | 1.8% (-3.5 to 7.1%)                       | 1.2% (-4.0 to 6.4%)                                |
| 14 Neck pain                | 14 Opioid use disorders     | 107.5% (71.2 to 140.2%)                 | 77.2% (46.2 to 105.1%)                    | 93.1% (59.3 to 124.4%)                             |
| 15 Breast cancer            | 15 Neck pain                | 23.5% (9.3 to 37.8%)                    | 5.5% (-6.6 to 17.7%)                      | -5.7% (-16.7 to 5.8%)                              |
| 16 Neonatal preterm birth   | 16 Age-related hearing loss | 44.4% (38.8 to 50.2%)                   | 23.3% (18.5 to 28.2%)                     | 9.9% (5.7 to 14.6%)                                |
| 17 Lower respiratory infect | 17 Colorectal cancer        | 11.4% (-2.9 to 27.2%)                   | -4.8% (-17.1 to 8.6%)                     | -18.0% (-28.8 to -6.4%)                            |
| 18 Falls                    | 18 Lower respiratory infect | 30.7% (13.1 to 49.3%)                   | 11.6% (-3.4 to 27.5%)                     | -3.0% (-15.7 to 11.0%)                             |
| 19 Age-related hearing loss | 19 Intracerebral hem        | 38.4% (22.1 to 57.3%)                   | 18.2% (4.3 to 34.3%)                      | 1.5% (-10.7 to 15.3%)                              |
| 20 Intracerebral hem        | 20 Breast cancer            | -1.4% (-18.6 to 19.3%)                  | -15.8% (-30.5 to 1.9%)                    | -29.7% (-42.4 to -14.9%)                           |
| 21 Self-harm by firearm     | 21 Self-harm by firearm     | 16.9% (-6.7 to 43.5%)                   | -0.1% (-20.3 to 22.6%)                    | -0.7% (-21.4 to 22.5%)                             |
| 22 Other cardiovascular     | 22 Self-harm other means    | 71.3% (35.6 to 106.1%)                  | 46.3% (15.8 to 76.0%)                     | 51.3% (18.9 to 82.8%)                              |
| 23 Acne vulgaris            | 23 Diabetes CKD             | 114.2% (93.2 to 136.1%)                 | 82.9% (65.0 to 101.7%)                    | 61.4% (46.7 to 77.7%)                              |
| 24 Opioid use disorders     | 24 Alcohol use disorders    | 26.5% (14.3 to 40.6%)                   | 8.0% (-2.4 to 20.1%)                      | 6.1% (-3.1 to 17.3%)                               |
| 25 Alcohol use disorders    | 25 Neonatal preterm birth   | -9.4% (-22.1 to 5.8%)                   | -22.6% (-33.5 to -9.6%)                   | -13.1% (-25.3 to 1.2%)                             |
| 27 Self-harm other means    | 26 Other cardiovascular     |                                         |                                           |                                                    |
| 37 Diabetes CKD             | 27 Acne vulgaris            |                                         |                                           |                                                    |

Legend:

Communicable, maternal, neonatal and nutritional

Non-communicable

Injuries

**Top 25 most-detailed causes of DALYs for 1990 and 2016 for both sexes in Kentucky**

| Leading causes 1990         | Leading causes 2016         | Mean % change number of DALYs 1990-2016 | Mean % change all-age DALY rate 1990-2016 | Mean % change age-standardized DALY rate 1990-2016 |
|-----------------------------|-----------------------------|-----------------------------------------|-------------------------------------------|----------------------------------------------------|
| 1 Ischemic heart disease    | 1 Ischemic heart disease    | -10.7% (-17.8 to -2.6%)                 | -25.2% (-31.2 to -18.5%)                  | -39.5% (-44.5 to -33.9%)                           |
| 2 Lung cancer               | 2 Lung cancer               | 32.5% (19.7 to 46.0%)                   | 10.9% (0.2 to 22.2%)                      | -16.6% (-24.5 to -8.1%)                            |
| 3 COPD                      | 3 COPD                      | 91.4% (78.4 to 106.4%)                  | 60.3% (49.3 to 72.8%)                     | 25.3% (16.9 to 34.8%)                              |
| 4 Opioid use disorders      | 4 Opioid use disorders      | 53.7% (20.1 to 78.0%)                   | 28.7% (0.6 to 49.0%)                      | 42.1% (11.2 to 63.8%)                              |
| 5 Low back pain             | 5 Diabetes                  | 72.8% (61.3 to 83.9%)                   | 44.7% (35.1 to 54.0%)                     | 17.6% (9.8 to 25.1%)                               |
| 6 Motor vehicle road inj    | 6 Low back pain             | 33.7% (19.7 to 48.5%)                   | 11.9% (0.2 to 24.3%)                      | 3.3% (-8.0 to 15.0%)                               |
| 7 Diabetes                  | 7 Alzheimer disease         | 53.6% (40.9 to 68.5%)                   | 28.6% (17.9 to 41.0%)                     | 3.2% (-5.1 to 13.0%)                               |
| 8 Major depression          | 8 Motor vehicle road inj    | -11.4% (-19.3 to -2.2%)                 | -25.8% (-32.4 to -18.1%)                  | -24.3% (-31.2 to -16.4%)                           |
| 9 Alzheimer disease         | 9 Major depression          | 20.7% (13.2 to 28.4%)                   | 1.1% (-5.2 to 7.5%)                       | 3.6% (-2.8 to 10.0%)                               |
| 10 Other musculoskeletal    | 10 Other musculoskeletal    | 28.8% (17.2 to 41.0%)                   | 7.8% (-1.9 to 18.1%)                      | 3.1% (-5.5 to 12.2%)                               |
| 11 Migraine                 | 11 Neck pain                | 52.6% (35.8 to 70.1%)                   | 27.7% (13.7 to 42.4%)                     | 10.2% (-1.9 to 23.3%)                              |
| 12 Ischemic stroke          | 12 Migraine                 | 17.9% (13.7 to 22.0%)                   | -1.3% (-4.8 to 2.2%)                      | 0.0% (-3.4 to 3.6%)                                |
| 13 Colorectal cancer        | 13 Ischemic stroke          | 20.6% (10.6 to 30.0%)                   | 1.0% (-7.4 to 8.8%)                       | -18.4% (-25.1 to -12.0%)                           |
| 14 Anxiety disorders        | 14 Colorectal cancer        | 32.0% (18.9 to 45.1%)                   | 10.5% (-0.5 to 21.5%)                     | -11.8% (-20.7 to -2.8%)                            |
| 15 Neck pain                | 15 Falls                    | 88.8% (70.0 to 101.7%)                  | 58.1% (42.3 to 68.8%)                     | 29.5% (18.2 to 37.5%)                              |
| 16 Lower respiratory infect | 16 Lower respiratory infect | 51.0% (34.3 to 69.2%)                   | 26.4% (12.4 to 41.6%)                     | 4.2% (-6.9 to 16.6%)                               |
| 17 Breast cancer            | 17 Anxiety disorders        | 20.5% (14.4 to 27.2%)                   | 0.9% (-4.3 to 6.5%)                       | 1.0% (-4.1 to 6.8%)                                |
| 18 Self-harm by firearm     | 18 Intracerebral hem        | 45.6% (31.6 to 60.6%)                   | 21.8% (10.2 to 34.5%)                     | 0.1% (-9.3 to 10.2%)                               |
| 19 Neonatal preterm birth   | 19 Age-related hearing loss | 60.4% (54.4 to 67.7%)                   | 34.2% (29.2 to 40.4%)                     | 10.5% (6.2 to 15.8%)                               |
| 20 Intracerebral hem        | 20 Self-harm by firearm     | 19.5% (0.9 to 40.5%)                    | 0.0% (-15.5 to 17.6%)                     | 1.1% (-14.7 to 18.9%)                              |
| 21 Falls                    | 21 Diabetes CKD             | 142.5% (123.8 to 163.0%)                | 103.0% (87.4 to 120.1%)                   | 65.7% (53.3 to 79.5%)                              |
| 22 Age-related hearing loss | 22 Breast cancer            | 8.7% (-5.4 to 25.7%)                    | -9.0% (-20.8 to 5.2%)                     | -27.7% (-36.9 to -16.6%)                           |
| 23 Acne vulgaris            | 23 Osteoarthritis           | 64.8% (56.8 to 73.1%)                   | 37.9% (31.2 to 44.9%)                     | 9.4% (3.7 to 15.1%)                                |
| 24 Other cardiovascular     | 24 Other cardiovascular     | 33.1% (22.0 to 45.1%)                   | 11.4% (2.1 to 21.4%)                      | -5.3% (-13.0 to 3.0%)                              |
| 25 Asthma                   | 25 Alcohol use disorders    | 42.2% (27.4 to 58.6%)                   | 19.1% (6.6 to 32.8%)                      | 17.0% (6.0 to 29.2%)                               |
| 26 Alcohol use disorders    | 30 Acne vulgaris            |                                         |                                           |                                                    |
| 27 Osteoarthritis           | 31 Neonatal preterm birth   |                                         |                                           |                                                    |
| 32 Diabetes CKD             | 34 Asthma                   |                                         |                                           |                                                    |

**Legend:**

- Communicable, maternal, neonatal and nutritional
- Non-communicable
- Injuries

**Top 25 most-detailed causes of DALYs for 1990 and 2016 for both sexes in Louisiana**

| Leading causes 1990           | Leading causes 2016           | Mean % change number of DALYs 1990-2016 | Mean % change all-age DALY rate 1990-2016 | Mean % change age-standardized DALY rate 1990-2016 |
|-------------------------------|-------------------------------|-----------------------------------------|-------------------------------------------|----------------------------------------------------|
| 1 Ischemic heart disease      | 1 Ischemic heart disease      | -15.5% (-21.8 to -7.8%)                 | -23.1% (-28.8 to -16.1%)                  | -41.5% (-45.8 to -36.0%)                           |
| 2 Lung cancer                 | 2 Lung cancer                 | 5.9% (-3.7 to 16.6%)                    | -3.6% (-12.3 to 6.1%)                     | -29.6% (-35.9 to -22.6%)                           |
| 3 Diabetes                    | 3 Diabetes                    | 38.2% (28.8 to 47.7%)                   | 25.8% (17.3 to 34.5%)                     | -1.9% (-8.4 to 4.7%)                               |
| 4 Motor vehicle road inj      | 4 COPD                        | 76.7% (64.5 to 90.4%)                   | 60.8% (49.7 to 73.3%)                     | 21.1% (12.8 to 30.5%)                              |
| 5 Low back pain               | 5 Opioid use disorders        | 47.7% (16.3 to 69.0%)                   | 34.4% (5.8 to 53.8%)                      | 40.6% (10.6 to 61.6%)                              |
| 6 COPD                        | 6 Low back pain               | 9.7% (-3.7 to 23.5%)                    | -0.1% (-12.4 to 12.4%)                    | -12.1% (-23.1 to -0.8%)                            |
| 7 Opioid use disorders        | 7 Motor vehicle road inj      | -12.4% (-21.5 to -2.5%)                 | -20.2% (-28.5 to -11.2%)                  | -19.1% (-27.1 to -10.1%)                           |
| 8 Other musculoskeletal       | 8 Neck pain                   | 42.7% (31.1 to 56.1%)                   | 29.9% (19.3 to 42.1%)                     | 8.9% (-0.4 to 19.3%)                               |
| 9 Neonatal preterm birth      | 9 Ischemic stroke             | 23.0% (12.5 to 33.8%)                   | 11.9% (2.4 to 21.8%)                      | -15.1% (-22.2 to -7.9%)                            |
| 10 Major depression           | 10 Other musculoskeletal      | 10.0% (-0.4 to 22.5%)                   | 0.1% (-9.3 to 11.5%)                      | -8.1% (-16.2 to 1.7%)                              |
| 11 Ischemic stroke            | 11 Major depression           | 9.1% (0.4 to 18.2%)                     | -0.7% (-8.6 to 7.6%)                      | -0.7% (-8.4 to 7.1%)                               |
| 12 Neck pain                  | 12 Lower respiratory infect   | 53.4% (37.2 to 71.0%)                   | 39.6% (24.8 to 55.7%)                     | 11.3% (-0.2 to 23.9%)                              |
| 13 Migraine                   | 13 Colorectal cancer          | 28.7% (16.6 to 43.2%)                   | 17.1% (6.1 to 30.4%)                      | -10.5% (-19.0 to -0.7%)                            |
| 14 Violence firearm           | 14 Migraine                   | 8.0% (4.2 to 11.9%)                     | -1.7% (-5.2 to 1.9%)                      | -3.2% (-6.5 to 0.2%)                               |
| 15 Anxiety disorders          | 15 Alzheimer disease          | 40.8% (26.6 to 55.1%)                   | 28.1% (15.2 to 41.2%)                     | -4.9% (-14.1 to 4.1%)                              |
| 16 Colorectal cancer          | 16 Intracerebral hem          | 26.8% (14.8 to 40.0%)                   | 15.4% (4.5 to 27.4%)                      | -9.4% (-18.0 to 0.2%)                              |
| 17 Intracerebral hem          | 17 Anxiety disorders          | 13.6% (7.4 to 19.9%)                    | 3.4% (-2.3 to 9.1%)                       | 1.1% (-4.1 to 6.8%)                                |
| 18 HIV/AIDS other             | 18 Falls                      | 59.6% (43.8 to 69.3%)                   | 45.3% (30.9 to 54.1%)                     | 18.0% (7.2 to 24.8%)                               |
| 19 Self-harm by firearm       | 19 Diabetes CKD               | 120.3% (103.8 to 139.0%)                | 100.5% (85.5 to 117.5%)                   | 56.4% (45.1 to 69.2%)                              |
| 20 Alzheimer disease          | 20 Violence firearm           | -11.7% (-24.7 to 5.7%)                  | -19.6% (-31.5 to -3.8%)                   | -12.8% (-25.3 to 4.6%)                             |
| 21 Lower respiratory infect   | 21 Age-related hearing loss   | 51.0% (45.6 to 57.2%)                   | 37.4% (32.5 to 43.1%)                     | 8.4% (4.4 to 13.1%)                                |
| 22 Breast cancer              | 22 Neonatal preterm birth     | -27.3% (-35.7 to -18.3%)                | -33.8% (-41.5 to -25.7%)                  | -20.3% (-29.8 to -10.5%)                           |
| 23 Acne vulgaris              | 23 Breast cancer              | 12.2% (-1.7 to 27.7%)                   | 2.1% (-10.6 to 16.3%)                     | -21.0% (-31.0 to -10.1%)                           |
| 24 Falls                      | 24 Self-harm by firearm       | -3.7% (-16.9 to 10.1%)                  | -12.4% (-24.4 to 0.2%)                    | -13.2% (-24.8 to -0.7%)                            |
| 25 Age-related hearing loss   | 25 Hypertensive heart disease | 59.7% (30.6 to 83.9%)                   | 45.3% (18.9 to 67.4%)                     | 13.9% (-8.4 to 32.4%)                              |
| 28 Hypertensive heart disease | 28 Acne vulgaris              |                                         |                                           |                                                    |
| 31 Diabetes CKD               | 36 HIV/AIDS other             |                                         |                                           |                                                    |

**Legend:**

- Communicable, maternal, neonatal and nutritional
- Non-communicable
- Injuries

**Top 25 most-detailed causes of DALYs for 1990 and 2016 for both sexes in Maine**

| Leading causes 1990         | Leading causes 2016         | Mean % change number of DALYs 1990-2016 | Mean % change all-age DALY rate 1990-2016 | Mean % change age-standardized DALY rate 1990-2016 |
|-----------------------------|-----------------------------|-----------------------------------------|-------------------------------------------|----------------------------------------------------|
| 1 Ischemic heart disease    | 1 Ischemic heart disease    | -33.6% (-39.3 to -27.3%)                | -38.5% (-43.8 to -32.6%)                  | -57.2% (-60.9 to -52.9%)                           |
| 2 Lung cancer               | 2 Lung cancer               | 23.3% (11.6 to 36.4%)                   | 14.2% (3.3 to 26.4%)                      | -25.5% (-32.6 to -17.8%)                           |
| 3 Low back pain             | 3 COPD                      | 66.0% (53.7 to 80.7%)                   | 53.7% (42.4 to 67.3%)                     | 4.0% (-3.5 to 12.8%)                               |
| 4 COPD                      | 4 Diabetes                  | 65.3% (52.7 to 78.1%)                   | 53.1% (41.4 to 64.9%)                     | 9.0% (0.7 to 17.3%)                                |
| 5 Diabetes                  | 5 Alzheimer disease         | 64.2% (49.2 to 79.7%)                   | 52.1% (38.2 to 66.5%)                     | 3.0% (-6.3 to 12.5%)                               |
| 6 Major depression          | 6 Low back pain             | 5.5% (-7.0 to 17.8%)                    | -2.3% (-13.9 to 9.1%)                     | -16.0% (-26.6 to -6.0%)                            |
| 7 Other musculoskeletal     | 7 Other musculoskeletal     | 18.3% (7.0 to 29.5%)                    | 9.6% (-0.9 to 19.9%)                      | 1.8% (-6.9 to 10.4%)                               |
| 8 Motor vehicle road inj    | 8 Major depression          | 5.7% (-1.0 to 13.2%)                    | -2.1% (-8.3 to 4.8%)                      | 1.0% (-5.2 to 8.1%)                                |
| 9 Alzheimer disease         | 9 Opioid use disorders      | 35.9% (12.0 to 55.3%)                   | 25.9% (3.7 to 43.9%)                      | 48.4% (21.3 to 69.9%)                              |
| 10 Migraine                 | 10 Falls                    | 90.2% (67.5 to 104.0%)                  | 76.1% (55.1 to 88.9%)                     | 28.1% (14.8 to 36.2%)                              |
| 11 Colorectal cancer        | 11 Ischemic stroke          | 27.6% (16.0 to 39.0%)                   | 18.2% (7.4 to 28.7%)                      | -19.0% (-26.3 to -11.9%)                           |
| 12 Opioid use disorders     | 12 Migraine                 | 2.8% (-0.8 to 6.3%)                     | -4.8% (-8.1 to -1.6%)                     | -3.5% (-6.6 to -0.3%)                              |
| 13 Ischemic stroke          | 13 Age-related hearing loss | 65.6% (59.1 to 73.1%)                   | 53.4% (47.4 to 60.3%)                     | 10.4% (6.2 to 15.5%)                               |
| 14 Anxiety disorders        | 14 Anxiety disorders        | 10.3% (4.5 to 16.8%)                    | 2.2% (-3.2 to 8.2%)                       | 1.6% (-3.6 to 7.1%)                                |
| 15 Neck pain                | 15 Colorectal cancer        | 1.6% (-8.9 to 12.3%)                    | -5.9% (-15.6 to 4.0%)                     | -34.0% (-40.9 to -27.0%)                           |
| 16 Breast cancer            | 16 Neck pain                | 28.7% (13.0 to 46.1%)                   | 19.2% (4.7 to 35.3%)                      | -6.5% (-18.3 to 5.7%)                              |
| 17 Falls                    | 17 Motor vehicle road inj   | -22.4% (-30.2 to -14.2%)                | -28.2% (-35.3 to -20.6%)                  | -25.4% (-32.8 to -17.9%)                           |
| 18 Age-related hearing loss | 18 Lower respiratory infect | 30.9% (14.5 to 49.1%)                   | 21.2% (6.1 to 38.1%)                      | -12.1% (-22.2 to -0.9%)                            |
| 19 Lower respiratory infect | 19 Intracerebral hem        | 36.4% (22.2 to 51.0%)                   | 26.3% (13.2 to 39.8%)                     | -9.0% (-18.5 to 0.6%)                              |
| 20 Neonatal preterm birth   | 20 Breast cancer            | -3.5% (-16.4 to 10.8%)                  | -10.6% (-22.6 to 2.6%)                    | -36.2% (-44.9 to -26.8%)                           |
| 21 Self-harm by firearm     | 21 Alcohol use disorders    | 24.8% (12.3 to 38.0%)                   | 15.6% (4.0 to 27.8%)                      | 12.2% (2.2 to 23.1%)                               |
| 22 Intracerebral hem        | 22 Diabetes CKD             | 115.4% (98.9 to 133.2%)                 | 99.5% (84.3 to 116.0%)                    | 44.1% (33.5 to 54.3%)                              |
| 23 Other cardiovascular     | 23 Other cardiovascular     | 16.6% (6.6 to 27.2%)                    | 8.0% (-1.2 to 17.8%)                      | -20.4% (-27.4 to -13.2%)                           |
| 24 Alcohol use disorders    | 24 Osteoarthritis           | 62.9% (54.9 to 71.2%)                   | 50.9% (43.5 to 58.6%)                     | 4.2% (-1.2 to 10.1%)                               |
| 25 Acne vulgaris            | 25 Self-harm other means    | 39.9% (20.1 to 61.5%)                   | 29.6% (11.3 to 49.5%)                     | 40.4% (19.6 to 62.2%)                              |
| 26 Self-harm other means    | 28 Self-harm by firearm     |                                         |                                           |                                                    |
| 28 Osteoarthritis           | 30 Neonatal preterm birth   |                                         |                                           |                                                    |
| 36 Diabetes CKD             | 32 Acne vulgaris            |                                         |                                           |                                                    |

**Legend:**

- Communicable, maternal, neonatal and nutritional
- Non-communicable
- Injuries

Top 25 most-detailed causes of DALYs for 1990 and 2016 for both sexes in Maryland

| Leading causes 1990           | Leading causes 2016           | Mean % change number of DALYs 1990-2016 | Mean % change all-age DALY rate 1990-2016 | Mean % change age-standardized DALY rate 1990-2016 |
|-------------------------------|-------------------------------|-----------------------------------------|-------------------------------------------|----------------------------------------------------|
| 1 Ischemic heart disease      | 1 Ischemic heart disease      | -14.3% (-21.0 to -7.1%)                 | -31.8% (-37.1 to -26.1%)                  | -50.2% (-54.1 to -45.8%)                           |
| 2 Lung cancer                 | 2 Diabetes                    | 60.7% (47.4 to 74.4%)                   | 27.9% (17.3 to 38.8%)                     | -0.7% (-9.0 to 8.1%)                               |
| 3 Low back pain               | 3 Lung cancer                 | -4.6% (-13.6 to 5.4%)                   | -24.1% (-31.3 to -16.1%)                  | -44.4% (-49.7 to -38.5%)                           |
| 4 Diabetes                    | 4 Low back pain               | 16.2% (1.2 to 32.3%)                    | -7.5% (-19.5 to 5.3%)                     | -16.9% (-27.0 to -5.7%)                            |
| 5 COPD                        | 5 COPD                        | 51.0% (40.7 to 63.6%)                   | 20.2% (11.9 to 30.2%)                     | -11.0% (-17.1 to -3.6%)                            |
| 6 Major depression            | 6 Alzheimer disease           | 103.9% (83.7 to 126.7%)                 | 62.3% (46.1 to 80.4%)                     | 8.0% (-2.1 to 19.7%)                               |
| 7 Other musculoskeletal       | 7 Other musculoskeletal       | 25.2% (12.6 to 38.1%)                   | -0.4% (-10.4 to 9.9%)                     | -5.7% (-14.2 to 2.8%)                              |
| 8 Motor vehicle road inj      | 8 Major depression            | 24.6% (15.3 to 34.6%)                   | -0.9% (-8.2 to 7.1%)                      | 3.5% (-3.6 to 11.2%)                               |
| 9 Neonatal preterm birth      | 9 Neck pain                   | 52.3% (36.2 to 70.6%)                   | 21.2% (8.4 to 35.8%)                      | 3.1% (-7.7 to 15.4%)                               |
| 10 HIV/AIDS other             | 10 Migraine                   | 23.4% (18.9 to 28.3%)                   | -1.8% (-5.4 to 2.1%)                      | 0.4% (-3.2 to 4.1%)                                |
| 11 Migraine                   | 11 Anxiety disorders          | 27.5% (20.7 to 34.5%)                   | 1.5% (-3.9 to 7.0%)                       | 1.8% (-3.5 to 7.4%)                                |
| 12 Opioid use disorders       | 12 Falls                      | 69.3% (52.4 to 79.0%)                   | 34.7% (21.3 to 42.4%)                     | 7.7% (-2.2 to 13.3%)                               |
| 13 Colorectal cancer          | 13 Ischemic stroke            | 28.3% (17.0 to 39.5%)                   | 2.1% (-6.9 to 11.0%)                      | -26.7% (-33.0 to -20.3%)                           |
| 14 Anxiety disorders          | 14 Opioid use disorders       | 4.7% (-6.4 to 17.3%)                    | -16.7% (-25.5 to -6.7%)                   | -4.4% (-14.9 to 7.6%)                              |
| 15 Neck pain                  | 15 Self-harm other means      | 35.7% (15.3 to 55.1%)                   | 8.0% (-8.2 to 23.5%)                      | 17.8% (-0.6 to 34.9%)                              |
| 16 Ischemic stroke            | 16 Colorectal cancer          | -0.4% (-10.9 to 10.0%)                  | -20.8% (-29.1 to -12.5%)                  | -40.3% (-46.5 to -34.0%)                           |
| 17 Alzheimer disease          | 17 Lower respiratory infect   | 33.9% (18.9 to 50.5%)                   | 6.6% (-5.4 to 19.8%)                      | -16.8% (-25.7 to -7.0%)                            |
| 18 Breast cancer              | 18 Age-related hearing loss   | 77.1% (70.3 to 84.2%)                   | 40.9% (35.5 to 46.6%)                     | 8.5% (4.6 to 12.7%)                                |
| 19 Violence firearm           | 19 Motor vehicle road inj     | -25.0% (-32.3 to -15.8%)                | -40.3% (-46.1 to -33.0%)                  | -40.0% (-45.8 to -32.6%)                           |
| 20 Lower respiratory infect   | 20 Breast cancer              | 3.9% (-9.8 to 19.5%)                    | -17.4% (-28.2 to -4.9%)                   | -35.7% (-44.2 to -26.2%)                           |
| 21 Self-harm other means      | 21 Neonatal preterm birth     | -27.4% (-36.9 to -17.7%)                | -42.2% (-49.8 to -34.5%)                  | -28.0% (-37.2 to -18.1%)                           |
| 22 Intracerebral hem          | 22 Intracerebral hem          | 18.5% (7.2 to 30.9%)                    | -5.7% (-14.7 to 4.1%)                     | -25.5% (-32.5 to -17.8%)                           |
| 23 Falls                      | 23 Osteoarthritis             | 81.7% (72.5 to 90.8%)                   | 44.6% (37.3 to 51.8%)                     | 9.3% (3.8 to 15.0%)                                |
| 24 Acne vulgaris              | 24 Hypertensive heart disease | 67.4% (26.0 to 99.3%)                   | 33.2% (0.2 to 58.6%)                      | 1.9% (-24.0 to 21.6%)                              |
| 25 Other cardiovascular       | 25 Diabetes CKD               | 87.8% (74.5 to 101.8%)                  | 49.5% (38.9 to 60.6%)                     | 16.0% (7.9 to 24.7%)                               |
| 26 Age-related hearing loss   | 26 Other cardiovascular       |                                         |                                           |                                                    |
| 32 Hypertensive heart disease | 27 Acne vulgaris              |                                         |                                           |                                                    |
| 33 Osteoarthritis             | 28 Violence firearm           |                                         |                                           |                                                    |
| 34 Diabetes CKD               | 36 HIV/AIDS other             |                                         |                                           |                                                    |

Legend:

- Communicable, maternal, neonatal and nutritional
- Non-communicable
- Injuries

Top 25 most-detailed causes of DALYs for 1990 and 2016 for both sexes in Massachusetts

| Leading causes 1990         | Leading causes 2016         | Mean % change number of DALYs 1990-2016 | Mean % change all-age DALY rate 1990-2016 | Mean % change age-standardized DALY rate 1990-2016 |
|-----------------------------|-----------------------------|-----------------------------------------|-------------------------------------------|----------------------------------------------------|
| 1 Ischemic heart disease    | 1 Ischemic heart disease    | -39.3% (-44.6 to -33.8%)                | -46.4% (-51.0 to -41.5%)                  | -56.9% (-60.9 to -52.8%)                           |
| 2 Lung cancer               | 2 Lung cancer               | -2.3% (-12.1 to 8.4%)                   | -13.7% (-22.3 to -4.2%)                   | -33.6% (-40.3 to -26.1%)                           |
| 3 Low back pain             | 3 Opioid use disorders      | 39.9% (14.4 to 61.9%)                   | 23.6% (1.1 to 43.1%)                      | 39.4% (13.9 to 61.8%)                              |
| 4 Opioid use disorders      | 4 COPD                      | 32.2% (22.3 to 43.4%)                   | 16.8% (8.1 to 26.7%)                      | -5.6% (-12.5 to 2.6%)                              |
| 5 COPD                      | 5 Alzheimer disease         | 62.6% (48.8 to 79.7%)                   | 43.7% (31.5 to 58.8%)                     | 13.6% (4.1 to 25.2%)                               |
| 6 Diabetes                  | 6 Diabetes                  | 30.2% (20.7 to 40.7%)                   | 15.1% (6.7 to 24.4%)                      | -5.3% (-12.2 to 2.3%)                              |
| 7 Major depression          | 7 Low back pain             | -4.5% (-15.6 to 6.4%)                   | -15.6% (-25.4 to -5.9%)                   | -24.2% (-33.1 to -15.2%)                           |
| 8 Other musculoskeletal     | 8 Other musculoskeletal     | 14.4% (4.0 to 24.9%)                    | 1.1% (-8.1 to 10.4%)                      | -2.9% (-10.8 to 5.9%)                              |
| 9 Migraine                  | 9 Major depression          | 5.4% (-1.5 to 13.5%)                    | -6.8% (-13.0 to 0.3%)                     | -4.0% (-10.2 to 2.8%)                              |
| 10 Colorectal cancer        | 10 Migraine                 | 7.5% (4.1 to 11.0%)                     | -5.0% (-8.0 to -1.9%)                     | -5.0% (-7.9 to -1.9%)                              |
| 11 Alzheimer disease        | 11 Falls                    | 72.0% (54.4 to 83.1%)                   | 52.0% (36.5 to 61.8%)                     | 26.1% (14.5 to 33.4%)                              |
| 12 Anxiety disorders        | 12 Anxiety disorders        | 15.9% (9.9 to 22.5%)                    | 2.5% (-2.9 to 8.3%)                       | 1.7% (-3.6 to 7.2%)                                |
| 13 Ischemic stroke          | 13 Neck pain                | 20.2% (6.4 to 34.1%)                    | 6.3% (-6.0 to 18.5%)                      | -9.9% (-20.7 to 1.3%)                              |
| 14 Breast cancer            | 14 Ischemic stroke          | 8.0% (-1.1 to 17.5%)                    | -4.6% (-12.5 to 3.8%)                     | -22.1% (-28.8 to -15.3%)                           |
| 15 Motor vehicle road inj   | 15 Age-related hearing loss | 45.3% (40.4 to 51.0%)                   | 28.4% (24.1 to 33.4%)                     | 8.0% (4.4 to 12.4%)                                |
| 16 Neck pain                | 16 Colorectal cancer        | -19.0% (-27.0 to -10.5%)                | -28.4% (-35.4 to -20.9%)                  | -41.4% (-47.2 to -35.2%)                           |
| 17 Lower respiratory infect | 17 Lower respiratory infect | 7.6% (-5.4 to 21.7%)                    | -4.9% (-16.4 to 7.5%)                     | -21.5% (-30.6 to -11.7%)                           |
| 18 Self-harm other means    | 18 Self-harm other means    | -0.3% (-13.5 to 16.2%)                  | -11.9% (-23.5 to 2.7%)                    | -6.9% (-18.9 to 8.0%)                              |
| 19 HIV/AIDS other           | 19 Breast cancer            | -22.2% (-32.7 to -10.0%)                | -31.3% (-40.5 to -20.5%)                  | -44.9% (-52.6 to -35.9%)                           |
| 20 Neonatal preterm birth   | 20 Alcohol use disorders    | 37.0% (22.9 to 52.3%)                   | 21.1% (8.7 to 34.6%)                      | 20.1% (8.8 to 32.0%)                               |
| 21 Falls                    | 21 Osteoarthritis           | 57.2% (48.6 to 66.3%)                   | 38.9% (31.4 to 46.9%)                     | 11.0% (4.7 to 17.6%)                               |
| 22 Age-related hearing loss | 22 Intracerebral hem        | 7.6% (-3.6 to 19.5%)                    | -4.9% (-14.8 to 5.6%)                     | -22.5% (-30.7 to -13.9%)                           |
| 23 Intracerebral hem        | 23 Acne vulgaris            | 6.2% (1.7 to 11.2%)                     | -6.2% (-10.1 to -1.7%)                    | 1.5% (-2.6 to 6.1%)                                |
| 24 Acne vulgaris            | 24 Motor vehicle road inj   | -32.1% (-39.3 to -23.6%)                | -40.0% (-46.4 to -32.5%)                  | -40.4% (-46.7 to -33.2%)                           |
| 25 Other cardiovascular     | 25 Diabetes CKD             | 77.2% (63.4 to 92.3%)                   | 56.6% (44.4 to 69.9%)                     | 30.3% (20.8 to 41.6%)                              |
| 26 Alcohol use disorders    | 27 Other cardiovascular     |                                         |                                           |                                                    |
| 29 Osteoarthritis           | 31 Neonatal preterm birth   |                                         |                                           |                                                    |
| 35 Diabetes CKD             | 70 HIV/AIDS other           |                                         |                                           |                                                    |

Legend:

- Communicable, maternal, neonatal and nutritional
- Non-communicable
- Injuries

**Top 25 most-detailed causes of DALYs for 1990 and 2016 for both sexes in Michigan**

| Leading causes 1990         | Leading causes 2016         | Mean % change number of DALYs 1990-2016 | Mean % change all-age DALY rate 1990-2016 | Mean % change age-standardized DALY rate 1990-2016 |
|-----------------------------|-----------------------------|-----------------------------------------|-------------------------------------------|----------------------------------------------------|
| 1 Ischemic heart disease    | 1 Ischemic heart disease    | -19.1% (-24.7 to -13.1%)                | -24.0% (-29.3 to -18.4%)                  | -44.8% (-48.8 to -40.6%)                           |
| 2 Lung cancer               | 2 Lung cancer               | 13.0% (2.9 to 23.8%)                    | 6.1% (-3.4 to 16.3%)                      | -25.3% (-31.8 to -18.0%)                           |
| 3 Low back pain             | 3 COPD                      | 71.7% (59.4 to 84.0%)                   | 61.2% (49.7 to 72.8%)                     | 16.6% (8.5 to 24.9%)                               |
| 4 Diabetes                  | 4 Diabetes                  | 52.6% (42.0 to 62.2%)                   | 43.3% (33.4 to 52.3%)                     | 8.8% (1.4 to 15.9%)                                |
| 5 COPD                      | 5 Low back pain             | -2.5% (-14.6 to 10.4%)                  | -8.5% (-19.8 to 3.6%)                     | -19.8% (-29.9 to -9.4%)                            |
| 6 Motor vehicle road inj    | 6 Alzheimer disease         | 61.4% (50.2 to 73.2%)                   | 51.6% (41.1 to 62.7%)                     | 1.9% (-4.7 to 8.9%)                                |
| 7 Other musculoskeletal     | 7 Opioid use disorders      | 49.5% (16.0 to 74.1%)                   | 40.4% (8.9 to 63.5%)                      | 58.1% (21.9 to 84.1%)                              |
| 8 Major depression          | 8 Other musculoskeletal     | 14.1% (4.2 to 24.1%)                    | 7.1% (-2.2 to 16.5%)                      | -1.0% (-9.0 to 7.6%)                               |
| 9 Neonatal preterm birth    | 9 Major depression          | 5.7% (-1.9 to 13.3%)                    | -0.7% (-7.9 to 6.4%)                      | 1.4% (-5.6 to 8.4%)                                |
| 10 Migraine                 | 10 Ischemic stroke          | 15.8% (7.3 to 25.2%)                    | 8.8% (0.8 to 17.6%)                       | -22.3% (-27.9 to -16.1%)                           |
| 11 Opioid use disorders     | 11 Migraine                 | 0.4% (-3.3 to 4.2%)                     | -5.7% (-9.2 to -2.2%)                     | -4.5% (-7.9 to -0.9%)                              |
| 12 Ischemic stroke          | 12 Falls                    | 61.5% (44.3 to 71.4%)                   | 51.6% (35.5 to 60.9%)                     | 17.5% (6.8 to 23.6%)                               |
| 13 Alzheimer disease        | 13 Anxiety disorders        | 8.7% (2.8 to 14.5%)                     | 2.1% (-3.5 to 7.5%)                       | 1.4% (-3.9 to 6.3%)                                |
| 14 Anxiety disorders        | 14 Neck pain                | 20.7% (5.9 to 37.8%)                    | 13.4% (-0.5 to 29.4%)                     | -6.8% (-18.5 to 6.0%)                              |
| 15 Colorectal cancer        | 15 Colorectal cancer        | 9.3% (-0.2 to 20.1%)                    | 2.6% (-6.3 to 12.8%)                      | -23.6% (-30.2 to -15.9%)                           |
| 16 Neck pain                | 16 Age-related hearing loss | 57.8% (51.2 to 64.8%)                   | 48.2% (42.0 to 54.8%)                     | 11.7% (7.2 to 16.7%)                               |
| 17 Breast cancer            | 17 Motor vehicle road inj   | -33.9% (-40.8 to -26.6%)                | -37.9% (-44.4 to -31.1%)                  | -37.6% (-44.0 to -30.8%)                           |
| 18 Lower respiratory infect | 18 Intracerebral hem        | 13.9% (3.4 to 25.9%)                    | 6.9% (-2.9 to 18.3%)                      | -17.6% (-25.0 to -9.1%)                            |
| 19 Violence firearm         | 19 Lower respiratory infect | 9.8% (-3.1 to 21.8%)                    | 3.1% (-9.0 to 14.3%)                      | -20.6% (-29.3 to -12.4%)                           |
| 20 Intracerebral hem        | 20 Breast cancer            | -4.8% (-16.9 to 7.7%)                   | -10.6% (-22.0 to 1.2%)                    | -32.5% (-41.2 to -23.6%)                           |
| 21 Falls                    | 21 Self-harm other means    | 31.5% (10.0 to 50.7%)                   | 23.5% (3.3 to 41.6%)                      | 32.3% (10.3 to 51.8%)                              |
| 22 Acne vulgaris            | 22 Diabetes CKD             | 103.1% (88.4 to 119.3%)                 | 90.7% (76.9 to 105.9%)                    | 44.8% (34.7 to 55.7%)                              |
| 23 Age-related hearing loss | 23 Osteoarthritis           | 50.2% (42.2 to 58.0%)                   | 41.0% (33.5 to 48.4%)                     | 3.6% (-2.0 to 9.2%)                                |
| 24 Alcohol use disorders    | 24 Neonatal preterm birth   | -45.7% (-53.2 to -37.7%)                | -49.0% (-56.1 to -41.5%)                  | -34.5% (-43.5 to -25.1%)                           |
| 25 Self-harm by firearm     | 25 Other cardiovascular     | 23.3% (13.3 to 34.2%)                   | 15.8% (6.4 to 26.0%)                      | -9.3% (-16.8 to -1.0%)                             |
| 26 Self-harm other means    | 26 Alcohol use disorders    |                                         |                                           |                                                    |
| 27 Other cardiovascular     | 28 Acne vulgaris            |                                         |                                           |                                                    |
| 30 Osteoarthritis           | 31 Self-harm by firearm     |                                         |                                           |                                                    |
| 37 Diabetes CKD             | 33 Violence firearm         |                                         |                                           |                                                    |

**Legend:**

- Communicable, maternal, neonatal and nutritional
- Non-communicable
- Injuries



**Top 25 most-detailed causes of DALYs for 1990 and 2016 for both sexes in Minnesota**

| Leading causes 1990         | Leading causes 2016         | Mean % change number of DALYs 1990-2016 | Mean % change all-age DALY rate 1990-2016 | Mean % change age-standardized DALY rate 1990-2016 |
|-----------------------------|-----------------------------|-----------------------------------------|-------------------------------------------|----------------------------------------------------|
| 1 Ischemic heart disease    | 1 Ischemic heart disease    | -35.4% (-41.9 to -28.4%)                | -48.7% (-53.8 to -43.1%)                  | -59.6% (-63.9 to -54.9%)                           |
| 2 Lung cancer               | 2 Lung cancer               | 32.1% (18.1 to 47.1%)                   | 4.9% (-6.2 to 16.8%)                      | -22.8% (-30.9 to -14.0%)                           |
| 3 Low back pain             | 3 Diabetes                  | 78.9% (64.0 to 91.7%)                   | 42.1% (30.3 to 52.2%)                     | 13.2% (3.8 to 21.7%)                               |
| 4 Major depression          | 4 COPD                      | 61.8% (48.6 to 77.5%)                   | 28.5% (18.0 to 40.9%)                     | 0.8% (-7.4 to 10.5%)                               |
| 5 COPD                      | 5 Alzheimer disease         | 56.8% (39.8 to 75.3%)                   | 24.5% (11.0 to 39.2%)                     | 0.9% (-9.7 to 12.2%)                               |
| 6 Motor vehicle road inj    | 6 Low back pain             | 4.0% (-8.6 to 17.5%)                    | -17.4% (-27.4 to -6.7%)                   | -25.4% (-35.0 to -15.5%)                           |
| 7 Other musculoskeletal     | 7 Falls                     | 99.0% (77.4 to 112.4%)                  | 58.0% (40.9 to 68.7%)                     | 29.2% (17.1 to 37.0%)                              |
| 8 Alzheimer disease         | 8 Major depression          | 22.2% (14.1 to 30.1%)                   | -3.0% (-9.4 to 3.3%)                      | -0.9% (-7.0 to 5.4%)                               |
| 9 Diabetes                  | 9 Other musculoskeletal     | 31.6% (19.6 to 44.4%)                   | 4.5% (-5.0 to 14.7%)                      | -0.4% (-9.4 to 9.0%)                               |
| 10 Ischemic stroke          | 10 Migraine                 | 21.0% (16.6 to 26.0%)                   | -3.9% (-7.4 to 0.1%)                      | -3.8% (-7.3 to 0.1%)                               |
| 11 Migraine                 | 11 Anxiety disorders        | 28.7% (22.3 to 35.7%)                   | 2.2% (-2.9 to 7.8%)                       | 1.5% (-3.5 to 6.9%)                                |
| 12 Anxiety disorders        | 12 Ischemic stroke          | 15.5% (5.3 to 25.8%)                    | -8.3% (-16.4 to -0.1%)                    | -25.5% (-32.0 to -19.0%)                           |
| 13 Colorectal cancer        | 13 Age-related hearing loss | 66.4% (60.5 to 72.6%)                   | 32.1% (27.5 to 37.1%)                     | 9.2% (5.3 to 13.6%)                                |
| 14 Falls                    | 14 Opioid use disorders     | 122.4% (90.3 to 154.7%)                 | 76.6% (51.1 to 102.3%)                    | 97.5% (69.1 to 126.3%)                             |
| 15 Breast cancer            | 15 Motor vehicle road inj   | -18.3% (-27.7 to -9.0%)                 | -35.1% (-42.6 to -27.8%)                  | -36.2% (-43.5 to -28.6%)                           |
| 16 Neck pain                | 16 Colorectal cancer        | 11.9% (0.5 to 24.1%)                    | -11.2% (-20.2 to -1.4%)                   | -30.5% (-37.7 to -22.6%)                           |
| 17 Age-related hearing loss | 17 Neck pain                | 28.4% (11.8 to 46.9%)                   | 2.0% (-11.2 to 16.6%)                     | -13.8% (-25.5 to -1.3%)                            |
| 18 Neonatal preterm birth   | 18 Alcohol use disorders    | 41.3% (29.1 to 56.0%)                   | 12.2% (2.5 to 23.9%)                      | 8.9% (0.7 to 18.8%)                                |
| 19 Acne vulgaris            | 19 Intracerebral hem        | 36.3% (22.2 to 52.2%)                   | 8.2% (-3.0 to 20.8%)                      | -13.5% (-22.7 to -3.4%)                            |
| 20 Lower respiratory infect | 20 Self-harm other means    | 42.7% (23.8 to 61.9%)                   | 13.3% (-1.7 to 28.6%)                     | 18.1% (1.8 to 34.3%)                               |
| 21 Intracerebral hem        | 21 Breast cancer            | -1.0% (-14.7 to 13.9%)                  | -21.4% (-32.3 to -9.6%)                   | -39.4% (-47.8 to -30.0%)                           |
| 22 Alcohol use disorders    | 22 Acne vulgaris            | 12.2% (7.7 to 16.7%)                    | -10.9% (-14.5 to -7.3%)                   | -1.6% (-5.6 to 2.3%)                               |
| 23 Self-harm other means    | 23 Lower respiratory infect | 11.1% (-1.9 to 25.3%)                   | -11.8% (-22.1 to -0.5%)                   | -25.8% (-34.2 to -17.0%)                           |
| 24 Other cardiovascular     | 24 Diabetes CKD             | 134.9% (116.4 to 155.1%)                | 86.6% (71.8 to 102.6%)                    | 51.6% (40.2 to 64.1%)                              |
| 25 Self-harm by firearm     | 25 Osteoarthritis           | 82.9% (70.8 to 97.5%)                   | 45.3% (35.6 to 56.8%)                     | 11.7% (4.0 to 21.0%)                               |
| 26 Opioid use disorders     | 26 Other cardiovascular     |                                         |                                           |                                                    |
| 32 Osteoarthritis           | 28 Neonatal preterm birth   |                                         |                                           |                                                    |
| 42 Diabetes CKD             | 29 Self-harm by firearm     |                                         |                                           |                                                    |

**Legend:**

- Communicable, maternal, neonatal and nutritional
- Non-communicable
- Injuries

**Top 25 most-detailed causes of DALYs for 1990 and 2016 for both sexes in Mississippi**

| Leading causes 1990           | Leading causes 2016           | Mean % change number of DALYs 1990-2016 | Mean % change all-age DALY rate 1990-2016 | Mean % change age-standardized DALY rate 1990-2016 |
|-------------------------------|-------------------------------|-----------------------------------------|-------------------------------------------|----------------------------------------------------|
| 1 Ischemic heart disease      | 1 Ischemic heart disease      | -12.7% (-22.7 to -1.8%)                 | -24.3% (-33.0 to -14.9%)                  | -38.7% (-45.8 to -30.9%)                           |
| 2 Lung cancer                 | 2 Lung cancer                 | 31.8% (14.4 to 51.6%)                   | 14.2% (-0.9 to 31.4%)                     | -13.7% (-25.2 to -0.7%)                            |
| 3 Motor vehicle road inj      | 3 COPD                        | 95.2% (76.4 to 116.1%)                  | 69.2% (52.9 to 87.3%)                     | 33.5% (20.8 to 47.5%)                              |
| 4 Low back pain               | 4 Diabetes                    | 91.7% (76.9 to 106.4%)                  | 66.1% (53.3 to 78.9%)                     | 34.1% (23.7 to 44.5%)                              |
| 5 COPD                        | 5 Motor vehicle road inj      | -13.3% (-24.9 to -2.5%)                 | -24.8% (-34.9 to -15.5%)                  | -22.9% (-33.1 to -13.4%)                           |
| 6 Diabetes                    | 6 Low back pain               | 3.0% (-9.4 to 16.0%)                    | -10.8% (-21.4 to 0.5%)                    | -20.6% (-30.3 to -10.5%)                           |
| 7 Ischemic stroke             | 7 Ischemic stroke             | 21.1% (8.9 to 34.2%)                    | 4.9% (-5.6 to 16.3%)                      | -14.5% (-22.9 to -5.3%)                            |
| 8 Neonatal preterm birth      | 8 Alzheimer disease           | 40.2% (24.9 to 55.8%)                   | 21.5% (8.2 to 35.0%)                      | 0.4% (-10.2 to 11.4%)                              |
| 9 Major depression            | 9 Lower respiratory infect    | 51.6% (32.0 to 71.8%)                   | 31.4% (14.4 to 48.9%)                     | 8.8% (-4.7 to 22.8%)                               |
| 10 Migraine                   | 10 Intracerebral hem          | 40.5% (22.5 to 59.0%)                   | 21.8% (6.2 to 37.8%)                      | -1.2% (-13.5 to 11.7%)                             |
| 11 Other musculoskeletal      | 11 Major depression           | 17.0% (8.4 to 25.2%)                    | 1.4% (-6.0 to 8.5%)                       | 1.4% (-6.1 to 8.5%)                                |
| 12 Alzheimer disease          | 12 Opioid use disorders       | 70.2% (38.0 to 95.1%)                   | 47.5% (19.6 to 69.1%)                     | 54.9% (25.7 to 77.8%)                              |
| 13 Intracerebral hem          | 13 Colorectal cancer          | 39.4% (21.2 to 59.6%)                   | 20.8% (5.0 to 38.4%)                      | -3.4% (-16.1 to 10.6%)                             |
| 14 Anxiety disorders          | 14 Falls                      | 75.9% (55.0 to 88.7%)                   | 52.4% (34.4 to 63.6%)                     | 25.3% (12.0 to 33.8%)                              |
| 15 Colorectal cancer          | 15 Other musculoskeletal      | 10.8% (-0.7 to 23.4%)                   | -4.0% (-13.9 to 6.9%)                     | -9.8% (-18.3 to 0.1%)                              |
| 16 Lower respiratory infect   | 16 Migraine                   | 8.5% (4.1 to 13.1%)                     | -5.9% (-9.7 to -2.0%)                     | -7.3% (-10.8 to -3.5%)                             |
| 17 Neck pain                  | 17 Neck pain                  | 44.5% (29.2 to 62.1%)                   | 25.2% (12.0 to 40.5%)                     | 5.6% (-6.3 to 18.8%)                               |
| 18 Violence firearm           | 18 Anxiety disorders          | 19.1% (12.8 to 25.9%)                   | 3.2% (-2.2 to 9.1%)                       | 1.4% (-4.0 to 6.8%)                                |
| 19 Opioid use disorders       | 19 Diabetes CKD               | 136.4% (112.9 to 161.8%)                | 104.9% (84.5 to 126.9%)                   | 67.5% (50.7 to 85.1%)                              |
| 20 Self-harm by firearm       | 20 Age-related hearing loss   | 51.8% (45.1 to 58.7%)                   | 31.6% (25.8 to 37.6%)                     | 9.4% (4.5 to 14.7%)                                |
| 21 Breast cancer              | 21 Hypertensive heart disease | 97.7% (38.3 to 144.5%)                  | 71.3% (19.9 to 111.9%)                    | 41.5% (-3.7 to 76.1%)                              |
| 22 Falls                      | 22 Breast cancer              | 23.7% (2.3 to 46.0%)                    | 7.2% (-11.4 to 26.5%)                     | -14.6% (-29.5 to 1.5%)                             |
| 23 Age-related hearing loss   | 23 Self-harm by firearm       | 17.5% (-5.6 to 41.8%)                   | 1.8% (-18.2 to 22.9%)                     | 1.3% (-18.5 to 22.4%)                              |
| 24 Other cardiovascular       | 24 Neonatal preterm birth     | -30.3% (-39.8 to -20.9%)                | -39.6% (-47.8 to -31.4%)                  | -25.3% (-35.3 to -15.1%)                           |
| 25 Acne vulgaris              | 25 Violence firearm           | -1.3% (-17.9 to 17.1%)                  | -14.4% (-28.8 to 1.5%)                    | -6.9% (-22.6 to 10.4%)                             |
| 29 Hypertensive heart disease | 26 Other cardiovascular       |                                         |                                           |                                                    |
| 30 Diabetes CKD               | 31 Acne vulgaris              |                                         |                                           |                                                    |

**Legend:**

- Communicable, maternal, neonatal and nutritional
- Non-communicable
- Injuries

Top 25 most-detailed causes of DALYs for 1990 and 2016 for both sexes in Missouri

| Leading causes 1990         | Leading causes 2016         | Mean % change number of DALYs 1990-2016 | Mean % change all-age DALY rate 1990-2016 | Mean % change age-standardized DALY rate 1990-2016 |
|-----------------------------|-----------------------------|-----------------------------------------|-------------------------------------------|----------------------------------------------------|
| 1 Ischemic heart disease    | 1 Ischemic heart disease    | -15.6% (-22.1 to -9.3%)                 | -28.8% (-34.2 to -23.4%)                  | -39.3% (-44.2 to -34.5%)                           |
| 2 Lung cancer               | 2 Lung cancer               | 17.6% (5.9 to 29.0%)                    | -0.7% (-10.7 to 8.9%)                     | -22.5% (-30.2 to -14.9%)                           |
| 3 Low back pain             | 3 COPD                      | 72.7% (60.6 to 85.7%)                   | 45.8% (35.5 to 56.8%)                     | 20.3% (11.9 to 29.6%)                              |
| 4 Motor vehicle road inj    | 4 Diabetes                  | 69.2% (57.6 to 81.3%)                   | 42.8% (33.0 to 53.1%)                     | 20.7% (12.5 to 28.8%)                              |
| 5 COPD                      | 5 Low back pain             | 14.8% (1.6 to 28.4%)                    | -3.1% (-14.3 to 8.4%)                     | -10.8% (-21.6 to 0.0%)                             |
| 6 Diabetes                  | 6 Alzheimer disease         | 47.7% (31.6 to 66.4%)                   | 24.7% (11.1 to 40.4%)                     | 5.9% (-5.4 to 18.3%)                               |
| 7 Major depression          | 7 Opioid use disorders      | 125.3% (72.8 to 160.8%)                 | 90.1% (45.9 to 120.2%)                    | 108.5% (60.1 to 141.2%)                            |
| 8 Alzheimer disease         | 8 Major depression          | 16.8% (8.7 to 25.0%)                    | -1.4% (-8.3 to 5.5%)                      | -0.1% (-6.9 to 6.9%)                               |
| 9 Other musculoskeletal     | 9 Other musculoskeletal     | 21.5% (10.6 to 33.2%)                   | 2.6% (-6.6 to 12.5%)                      | -1.2% (-9.5 to 7.6%)                               |
| 10 Ischemic stroke          | 10 Motor vehicle road inj   | -16.6% (-24.2 to -8.0%)                 | -29.6% (-36.0 to -22.3%)                  | -30.0% (-36.4 to -22.5%)                           |
| 11 Migraine                 | 11 Ischemic stroke          | 18.0% (8.8 to 28.4%)                    | -0.4% (-8.2 to 8.4%)                      | -15.0% (-21.8 to -7.9%)                            |
| 12 Colorectal cancer        | 12 Falls                    | 77.2% (60.1 to 88.9%)                   | 49.6% (35.1 to 59.4%)                     | 25.3% (15.0 to 32.6%)                              |
| 13 Anxiety disorders        | 13 Migraine                 | 16.5% (12.4 to 20.8%)                   | -1.7% (-5.1 to 2.0%)                      | -1.3% (-4.8 to 2.3%)                               |
| 14 Neck pain                | 14 Neck pain                | 36.5% (21.1 to 53.6%)                   | 15.2% (2.2 to 29.6%)                      | 0.2% (-11.6 to 12.8%)                              |
| 15 Neonatal preterm birth   | 15 Anxiety disorders        | 20.6% (13.9 to 27.1%)                   | 1.8% (-3.9 to 7.3%)                       | 1.1% (-4.4 to 6.5%)                                |
| 16 Breast cancer            | 16 Colorectal cancer        | 6.7% (-3.7 to 18.2%)                    | -9.9% (-18.7 to -0.2%)                    | -24.4% (-31.8 to -16.4%)                           |
| 17 Lower respiratory infect | 17 Age-related hearing loss | 52.1% (46.4 to 58.7%)                   | 28.4% (23.5 to 33.9%)                     | 10.6% (6.4 to 15.5%)                               |
| 18 Opioid use disorders     | 18 Lower respiratory infect | 29.0% (15.8 to 44.1%)                   | 8.9% (-2.3 to 21.6%)                      | -6.2% (-15.3 to 4.1%)                              |
| 19 Falls                    | 19 Intracerebral hem        | 32.4% (19.1 to 44.6%)                   | 11.7% (0.5 to 22.1%)                      | -6.4% (-15.6 to 2.1%)                              |
| 20 Intracerebral hem        | 20 Breast cancer            | 4.5% (-9.7 to 20.0%)                    | -11.8% (-23.8 to 1.3%)                    | -27.8% (-37.7 to -16.9%)                           |
| 21 Age-related hearing loss | 21 Diabetes CKD             | 119.2% (103.0 to 138.4%)                | 85.0% (71.3 to 101.2%)                    | 58.2% (46.6 to 71.8%)                              |
| 22 Self-harm by firearm     | 22 Self-harm by firearm     | 10.2% (-5.3 to 26.7%)                   | -7.0% (-20.1 to 6.9%)                     | -7.5% (-20.9 to 6.6%)                              |
| 23 Violence firearm         | 23 Other cardiovascular     | 24.9% (14.6 to 36.0%)                   | 5.5% (-3.2 to 14.8%)                      | -7.3% (-15.2 to 0.9%)                              |
| 24 Other cardiovascular     | 24 Self-harm other means    | 60.1% (32.5 to 84.2%)                   | 35.1% (11.9 to 55.4%)                     | 41.6% (16.6 to 63.0%)                              |
| 25 Acne vulgaris            | 25 Osteoarthritis           | 53.2% (45.6 to 60.5%)                   | 29.3% (22.9 to 35.5%)                     | 7.0% (1.5 to 12.3%)                                |
| 28 Osteoarthritis           | 26 Neonatal preterm birth   |                                         |                                           |                                                    |
| 29 Self-harm other means    | 29 Acne vulgaris            |                                         |                                           |                                                    |
| 36 Diabetes CKD             | 30 Violence firearm         |                                         |                                           |                                                    |

Legend:

- Communicable, maternal, neonatal and nutritional
- Non-communicable
- Injuries

Top 25 most-detailed causes of DALYs for 1990 and 2016 for both sexes in Montana

| Leading causes 1990         | Leading causes 2016         | Mean % change number of DALYs 1990-2016 | Mean % change all-age DALY rate 1990-2016 | Mean % change age-standardized DALY rate 1990-2016 |
|-----------------------------|-----------------------------|-----------------------------------------|-------------------------------------------|----------------------------------------------------|
| 1 Ischemic heart disease    | 1 Ischemic heart disease    | -8.8% (-20.1 to 3.3%)                   | -29.5% (-38.3 to -20.2%)                  | -46.8% (-53.5 to -39.4%)                           |
| 2 Lung cancer               | 2 COPD                      | 69.4% (53.2 to 89.0%)                   | 30.9% (18.3 to 45.9%)                     | -2.1% (-11.3 to 8.7%)                              |
| 3 COPD                      | 3 Lung cancer               | 33.6% (16.2 to 53.1%)                   | 3.1% (-10.3 to 18.3%)                     | -25.7% (-35.3 to -15.1%)                           |
| 4 Motor vehicle road inj    | 4 Low back pain             | 29.8% (14.8 to 44.4%)                   | 0.2% (-11.3 to 11.5%)                     | -12.4% (-23.0 to -2.2%)                            |
| 5 Low back pain             | 5 Diabetes                  | 79.4% (64.2 to 93.2%)                   | 38.5% (26.8 to 49.2%)                     | 7.2% (-2.0 to 15.4%)                               |
| 6 Major depression          | 6 Alzheimer disease         | 85.0% (63.6 to 110.5%)                  | 42.9% (26.4 to 62.6%)                     | 3.7% (-8.2 to 17.6%)                               |
| 7 Other musculoskeletal     | 7 Motor vehicle road inj    | 0.4% (-11.6 to 13.6%)                   | -22.4% (-31.7 to -12.3%)                  | -24.3% (-33.5 to -14.1%)                           |
| 8 Diabetes                  | 8 Major depression          | 36.4% (28.1 to 45.4%)                   | 5.4% (-1.1 to 12.3%)                      | 6.0% (-0.4 to 12.8%)                               |
| 9 Alzheimer disease         | 9 Other musculoskeletal     | 34.8% (22.5 to 47.8%)                   | 4.1% (-5.4 to 14.1%)                      | -2.9% (-11.2 to 6.4%)                              |
| 10 Migraine                 | 10 Falls                    | 112.2% (92.0 to 127.2%)                 | 63.9% (48.3 to 75.5%)                     | 27.3% (16.2 to 35.9%)                              |
| 11 Ischemic stroke          | 11 Ischemic stroke          | 34.6% (21.6 to 47.9%)                   | 3.9% (-6.1 to 14.2%)                      | -22.2% (-29.8 to -14.7%)                           |
| 12 Anxiety disorders        | 12 Neck pain                | 50.5% (34.0 to 68.6%)                   | 16.2% (3.5 to 30.2%)                      | -2.7% (-13.7 to 8.6%)                              |
| 13 Self-harm by firearm     | 13 Migraine                 | 23.3% (18.8 to 28.0%)                   | -4.8% (-8.2 to -1.1%)                     | -4.6% (-8.0 to -0.9%)                              |
| 14 Neck pain                | 14 Opioid use disorders     | 72.5% (46.9 to 96.5%)                   | 33.2% (13.5 to 51.8%)                     | 42.8% (21.7 to 63.7%)                              |
| 15 Colorectal cancer        | 15 Anxiety disorders        | 32.1% (25.5 to 38.8%)                   | 2.0% (-3.1 to 7.2%)                       | 1.3% (-3.5 to 6.3%)                                |
| 16 Falls                    | 16 Age-related hearing loss | 82.4% (74.9 to 90.8%)                   | 40.8% (35.1 to 47.3%)                     | 9.4% (5.2 to 14.3%)                                |
| 17 Opioid use disorders     | 17 Self-harm by firearm     | 25.0% (-1.3 to 53.4%)                   | -3.4% (-23.8 to 18.4%)                    | -6.0% (-26.1 to 15.8%)                             |
| 18 Breast cancer            | 18 Colorectal cancer        | 27.7% (10.3 to 46.7%)                   | -1.4% (-14.8 to 13.3%)                    | -24.7% (-35.1 to -13.5%)                           |
| 19 Alcohol use disorders    | 19 Alcohol use disorders    | 57.2% (42.1 to 75.0%)                   | 21.4% (9.7 to 35.1%)                      | 16.6% (6.0 to 29.0%)                               |
| 20 Age-related hearing loss | 20 Self-harm other means    | 69.6% (41.4 to 100.1%)                  | 31.0% (9.2 to 54.6%)                      | 34.6% (12.5 to 59.7%)                              |
| 21 Lower respiratory infect | 21 Lower respiratory infect | 29.4% (11.1 to 48.6%)                   | -0.1% (-14.2 to 14.8%)                    | -21.5% (-32.5 to -10.2%)                           |
| 22 Neonatal preterm birth   | 22 Intracerebral hem        | 44.5% (25.7 to 65.0%)                   | 11.6% (-3.0 to 27.4%)                     | -13.4% (-24.7 to -1.2%)                            |
| 23 Intracerebral hem        | 23 Breast cancer            | 18.2% (-1.8 to 42.5%)                   | -8.7% (-24.2 to 10.1%)                    | -29.2% (-41.6 to -14.3%)                           |
| 24 Asthma                   | 24 Osteoarthritis           | 87.7% (79.7 to 96.9%)                   | 44.9% (38.7 to 52.0%)                     | 8.6% (3.8 to 14.0%)                                |
| 25 Other cardiovascular     | 25 Other cardiovascular     | 33.4% (20.0 to 47.2%)                   | 3.0% (-7.4 to 13.7%)                      | -18.0% (-26.5 to -9.6%)                            |
| 27 Self-harm other means    | 28 Asthma                   |                                         |                                           |                                                    |
| 29 Osteoarthritis           | 33 Neonatal preterm birth   |                                         |                                           |                                                    |

Legend:

Communicable, maternal, neonatal and nutritional

Non-communicable

Injuries

**Top 25 most-detailed causes of DALYs for 1990 and 2016 for both sexes in Nebraska**

| Leading causes 1990         | Leading causes 2016         | Mean % change number of DALYs 1990-2016 | Mean % change all-age DALY rate 1990-2016 | Mean % change age-standardized DALY rate 1990-2016 |
|-----------------------------|-----------------------------|-----------------------------------------|-------------------------------------------|----------------------------------------------------|
| 1 Ischemic heart disease    | 1 Ischemic heart disease    | -37.9% (-42.5 to -32.6%)                | -48.5% (-52.3 to -44.1%)                  | -54.2% (-57.8 to -50.0%)                           |
| 2 Lung cancer               | 2 COPD                      | 59.1% (46.3 to 73.7%)                   | 31.9% (21.3 to 44.0%)                     | 15.7% (6.4 to 26.0%)                               |
| 3 Low back pain             | 3 Lung cancer               | 14.4% (2.8 to 26.4%)                    | -5.1% (-14.7 to 4.8%)                     | -21.8% (-29.9 to -13.6%)                           |
| 4 COPD                      | 4 Low back pain             | 19.6% (8.0 to 32.9%)                    | -0.8% (-10.5 to 10.2%)                    | -4.8% (-14.7 to 5.8%)                              |
| 5 Motor vehicle road inj    | 5 Diabetes                  | 70.6% (58.4 to 83.1%)                   | 41.4% (31.3 to 51.8%)                     | 24.0% (15.2 to 33.1%)                              |
| 6 Alzheimer disease         | 6 Alzheimer disease         | 29.8% (18.0 to 42.2%)                   | 7.6% (-2.1 to 17.9%)                      | -0.5% (-8.9 to 8.5%)                               |
| 7 Diabetes                  | 7 Other musculoskeletal     | 18.5% (7.5 to 29.5%)                    | -1.8% (-10.9 to 7.4%)                     | -5.1% (-13.0 to 3.3%)                              |
| 8 Other musculoskeletal     | 8 Motor vehicle road inj    | -8.9% (-17.0 to -0.5%)                  | -24.5% (-31.2 to -17.5%)                  | -25.6% (-32.3 to -18.4%)                           |
| 9 Ischemic stroke           | 9 Major depression          | 18.7% (11.2 to 26.3%)                   | -1.5% (-7.8 to 4.7%)                      | -0.4% (-6.5 to 6.2%)                               |
| 10 Major depression         | 10 Falls                    | 83.9% (64.8 to 95.3%)                   | 52.5% (36.7 to 62.0%)                     | 35.1% (22.6 to 43.3%)                              |
| 11 Migraine                 | 11 Ischemic stroke          | 10.9% (2.9 to 20.1%)                    | -8.0% (-14.7 to -0.4%)                    | -16.4% (-22.7 to -9.5%)                            |
| 12 Colorectal cancer        | 12 Migraine                 | 13.0% (8.8 to 17.1%)                    | -6.3% (-9.7 to -2.9%)                     | -6.3% (-9.9 to -3.0%)                              |
| 13 Anxiety disorders        | 13 Anxiety disorders        | 22.6% (15.9 to 28.9%)                   | 1.7% (-3.9 to 6.9%)                       | 1.2% (-4.6 to 6.4%)                                |
| 14 Neck pain                | 14 Colorectal cancer        | 5.5% (-5.3 to 16.7%)                    | -12.5% (-21.5 to -3.2%)                   | -23.5% (-31.3 to -15.4%)                           |
| 15 Breast cancer            | 15 Age-related hearing loss | 44.4% (39.5 to 49.7%)                   | 19.7% (15.7 to 24.1%)                     | 9.4% (5.6 to 13.6%)                                |
| 16 Lower respiratory infect | 16 Neck pain                | 22.5% (9.8 to 36.3%)                    | 1.5% (-9.0 to 13.1%)                      | -8.9% (-18.4 to 1.2%)                              |
| 17 Falls                    | 17 Intracerebral hem        | 32.6% (20.1 to 47.0%)                   | 10.0% (-0.4 to 21.9%)                     | -4.9% (-14.2 to 5.2%)                              |
| 18 Age-related hearing loss | 18 Opioid use disorders     | 96.4% (69.7 to 125.6%)                  | 62.9% (40.7 to 87.1%)                     | 75.3% (51.5 to 101.4%)                             |
| 19 Neonatal preterm birth   | 19 Lower respiratory infect | 4.2% (-6.9 to 17.8%)                    | -13.6% (-22.8 to -2.3%)                   | -22.6% (-30.3 to -12.7%)                           |
| 20 Intracerebral hem        | 20 Breast cancer            | -5.9% (-17.7 to 7.6%)                   | -21.9% (-31.8 to -10.8%)                  | -33.4% (-41.9 to -23.5%)                           |
| 21 Other cardiovascular     | 21 Other cardiovascular     | 10.4% (1.2 to 19.7%)                    | -8.5% (-16.1 to -0.8%)                    | -17.8% (-24.5 to -11.0%)                           |
| 22 Acne vulgaris            | 22 Self-harm other means    | 50.5% (29.3 to 73.6%)                   | 24.8% (7.2 to 44.0%)                      | 28.0% (9.5 to 48.2%)                               |
| 23 Self-harm by firearm     | 23 Diabetes CKD             | 98.1% (83.8 to 113.6%)                  | 64.3% (52.4 to 77.1%)                     | 47.9% (37.5 to 59.0%)                              |
| 24 Asthma                   | 24 Osteoarthritis           | 46.7% (40.6 to 52.8%)                   | 21.7% (16.6 to 26.7%)                     | 5.3% (0.5 to 10.0%)                                |
| 25 Self-harm other means    | 25 Acne vulgaris            | 7.9% (3.6 to 12.7%)                     | -10.5% (-14.1 to -6.6%)                   | -5.3% (-9.2 to -1.1%)                              |
| 26 Osteoarthritis           | 26 Self-harm by firearm     |                                         |                                           |                                                    |
| 28 Opioid use disorders     | 27 Neonatal preterm birth   |                                         |                                           |                                                    |
| 37 Diabetes CKD             | 35 Asthma                   |                                         |                                           |                                                    |

**Legend:**

Communicable, maternal, neonatal and nutritional

Non-communicable

Injuries

**Top 25 most-detailed causes of DALYs for 1990 and 2016 for both sexes in Nevada**

| Leading causes 1990           | Leading causes 2016           | Mean % change number of DALYs 1990-2016 | Mean % change all-age DALY rate 1990-2016 | Mean % change age-standardized DALY rate 1990-2016 |
|-------------------------------|-------------------------------|-----------------------------------------|-------------------------------------------|----------------------------------------------------|
| 1 Ischemic heart disease      | 1 Ischemic heart disease      | 72.4% (56.0 to 89.0%)                   | -28.8% (-35.6 to -21.9%)                  | -48.1% (-53.0 to -43.1%)                           |
| 2 Lung cancer                 | 2 COPD                        | 184.1% (163.1 to 206.6%)                | 17.4% (8.7 to 26.7%)                      | -12.7% (-19.1 to -6.0%)                            |
| 3 COPD                        | 3 Lung cancer                 | 94.1% (72.3 to 115.1%)                  | -19.8% (-28.8 to -11.1%)                  | -40.1% (-46.8 to -33.7%)                           |
| 4 Low back pain               | 4 Low back pain               | 151.1% (120.5 to 182.0%)                | 3.7% (-8.9 to 16.5%)                      | -6.6% (-17.9 to 4.7%)                              |
| 5 Motor vehicle road inj      | 5 Opioid use disorders        | 247.0% (167.6 to 298.5%)                | 43.3% (10.5 to 64.6%)                     | 59.2% (23.7 to 82.4%)                              |
| 6 Major depression            | 6 Diabetes                    | 264.8% (235.9 to 292.9%)                | 50.7% (38.8 to 62.3%)                     | 19.0% (9.7 to 28.5%)                               |
| 7 Opioid use disorders        | 7 Major depression            | 125.4% (110.7 to 141.5%)                | -6.9% (-13.0 to -0.2%)                    | -4.1% (-10.1 to 2.3%)                              |
| 8 Self-harm by firearm        | 8 Neck pain                   | 215.3% (183.7 to 251.4%)                | 30.3% (17.2 to 45.2%)                     | 12.8% (1.8 to 25.3%)                               |
| 9 Migraine                    | 9 Other musculoskeletal       | 146.4% (122.2 to 171.3%)                | 1.8% (-8.2 to 12.1%)                      | -2.1% (-11.4 to 7.4%)                              |
| 10 Diabetes                   | 10 Migraine                   | 137.0% (128.8 to 145.9%)                | -2.1% (-5.5 to 1.6%)                      | -0.3% (-3.6 to 3.4%)                               |
| 11 Other musculoskeletal      | 11 Alzheimer disease          | 279.9% (240.2 to 325.9%)                | 57.0% (40.5 to 75.9%)                     | -2.4% (-12.4 to 8.9%)                              |
| 12 Neck pain                  | 12 Anxiety disorders          | 146.0% (132.6 to 159.7%)                | 1.6% (-3.9 to 7.3%)                       | 2.2% (-3.2 to 7.7%)                                |
| 13 Anxiety disorders          | 13 Ischemic stroke            | 174.2% (152.1 to 198.9%)                | 13.3% (4.1 to 23.5%)                      | -20.6% (-26.7 to -13.7%)                           |
| 14 Colorectal cancer          | 14 Falls                      | 238.5% (201.1 to 261.5%)                | 39.8% (24.4 to 49.4%)                     | 12.5% (0.2 to 19.4%)                               |
| 15 Ischemic stroke            | 15 Lower respiratory infect   | 174.7% (142.3 to 212.4%)                | 13.5% (0.1 to 29.0%)                      | -12.9% (-22.6 to -1.8%)                            |
| 16 Alcohol use disorders      | 16 Colorectal cancer          | 140.2% (113.8 to 168.5%)                | -0.7% (-11.7 to 10.9%)                    | -24.3% (-32.4 to -15.2%)                           |
| 17 Lower respiratory infect   | 17 Motor vehicle road inj     | 26.3% (13.2 to 42.5%)                   | -47.8% (-53.2 to -41.1%)                  | -48.1% (-53.5 to -41.0%)                           |
| 18 Self-harm other means      | 18 Age-related hearing loss   | 256.3% (241.6 to 275.0%)                | 47.2% (41.1 to 54.9%)                     | 11.9% (7.6 to 17.1%)                               |
| 19 Intracerebral hem          | 19 Alcohol use disorders      | 135.3% (113.7 to 156.4%)                | -2.8% (-11.7 to 5.9%)                     | -3.5% (-11.9 to 4.4%)                              |
| 20 Neonatal preterm birth     | 20 Intracerebral hem          | 158.9% (132.2 to 188.0%)                | 7.0% (-4.1 to 19.0%)                      | -15.2% (-23.9 to -5.9%)                            |
| 21 Breast cancer              | 21 Self-harm by firearm       | 57.7% (33.1 to 85.2%)                   | -34.8% (-45.0 to -23.5%)                  | -35.4% (-45.8 to -23.7%)                           |
| 22 HIV/AIDS other             | 22 Self-harm other means      | 127.8% (88.0 to 178.3%)                 | -5.9% (-22.3 to 15.0%)                    | -1.5% (-18.8 to 21.5%)                             |
| 23 Falls                      | 23 Hypertensive heart disease | 194.0% (152.8 to 233.2%)                | 21.5% (4.4 to 37.6%)                      | -6.6% (-19.6 to 5.9%)                              |
| 24 Alzheimer disease          | 24 Breast cancer              | 122.8% (89.6 to 159.4%)                 | -7.9% (-21.7 to 7.2%)                     | -26.8% (-37.9 to -14.7%)                           |
| 25 Violence firearm           | 25 Diabetes CKD               | 318.2% (284.2 to 352.0%)                | 72.8% (58.7 to 86.7%)                     | 34.2% (23.2 to 44.5%)                              |
| 26 Age-related hearing loss   | 28 Acne vulgaris              |                                         |                                           |                                                    |
| 27 Acne vulgaris              | 33 Neonatal preterm birth     |                                         |                                           |                                                    |
| 28 Hypertensive heart disease | 37 Violence firearm           |                                         |                                           |                                                    |
| 39 Diabetes CKD               | 58 HIV/AIDS other             |                                         |                                           |                                                    |

**Legend:**

Communicable, maternal, neonatal and nutritional

Non-communicable

Injuries

Top 25 most-detailed causes of DALYs for 1990 and 2016 for both sexes in New Hampshire

| Leading causes 1990         | Leading causes 2016         | Mean % change number of DALYs 1990-2016 | Mean % change all-age DALY rate 1990-2016 | Mean % change age-standardized DALY rate 1990-2016 |
|-----------------------------|-----------------------------|-----------------------------------------|-------------------------------------------|----------------------------------------------------|
| 1 Ischemic heart disease    | 1 Ischemic heart disease    | -23.5% (-29.7 to -16.9%)                | -36.3% (-41.5 to -30.8%)                  | -58.4% (-61.8 to -54.6%)                           |
| 2 Lung cancer               | 2 Lung cancer               | 34.0% (21.4 to 49.0%)                   | 11.5% (1.0 to 24.0%)                      | -29.9% (-36.5 to -22.0%)                           |
| 3 Low back pain             | 3 COPD                      | 80.7% (67.4 to 94.3%)                   | 50.4% (39.3 to 61.7%)                     | -1.9% (-9.2 to 5.6%)                               |
| 4 Opioid use disorders      | 4 Diabetes                  | 81.5% (68.3 to 95.5%)                   | 51.1% (40.0 to 62.7%)                     | 4.4% (-3.2 to 12.1%)                               |
| 5 Major depression          | 5 Opioid use disorders      | 29.8% (10.3 to 46.4%)                   | 8.0% (-8.2 to 21.8%)                      | 29.2% (9.5 to 45.9%)                               |
| 6 COPD                      | 6 Low back pain             | 18.4% (4.1 to 33.8%)                    | -1.5% (-13.3 to 11.4%)                    | -16.0% (-25.7 to -5.4%)                            |
| 7 Diabetes                  | 7 Alzheimer disease         | 96.6% (75.7 to 117.4%)                  | 63.6% (46.2 to 80.9%)                     | 3.7% (-6.9 to 14.3%)                               |
| 8 Other musculoskeletal     | 8 Major depression          | 14.9% (7.5 to 23.6%)                    | -4.4% (-10.6 to 2.9%)                     | -2.3% (-7.6 to 3.9%)                               |
| 9 Migraine                  | 9 Other musculoskeletal     | 32.0% (19.0 to 45.8%)                   | 9.9% (-1.0 to 21.3%)                      | -0.5% (-8.9 to 8.2%)                               |
| 10 Motor vehicle road inj   | 10 Falls                    | 112.0% (88.1 to 127.0%)                 | 76.4% (56.5 to 88.9%)                     | 28.3% (15.1 to 36.2%)                              |
| 11 Alzheimer disease        | 11 Migraine                 | 14.8% (10.6 to 18.9%)                   | -4.5% (-7.9 to -1.0%)                     | -3.0% (-6.2 to 0.3%)                               |
| 12 Anxiety disorders        | 12 Neck pain                | 50.3% (32.7 to 68.9%)                   | 25.1% (10.5 to 40.6%)                     | -0.2% (-11.6 to 11.7%)                             |
| 13 Colorectal cancer        | 13 Anxiety disorders        | 23.2% (16.3 to 30.2%)                   | 2.6% (-3.2 to 8.3%)                       | 1.6% (-3.7 to 6.6%)                                |
| 14 Neck pain                | 14 Ischemic stroke          | 31.1% (18.9 to 42.9%)                   | 9.1% (-1.0 to 18.9%)                      | -28.3% (-34.9 to -21.7%)                           |
| 15 Ischemic stroke          | 15 Age-related hearing loss | 86.5% (79.5 to 94.7%)                   | 55.2% (49.4 to 62.0%)                     | 8.8% (5.0 to 13.5%)                                |
| 16 Breast cancer            | 16 Colorectal cancer        | 14.3% (3.6 to 26.8%)                    | -4.8% (-13.8 to 5.5%)                     | -36.3% (-42.2 to -29.4%)                           |
| 17 Falls                    | 17 Motor vehicle road inj   | -15.2% (-25.1 to -4.0%)                 | -29.4% (-37.6 to -20.1%)                  | -28.8% (-37.2 to -19.6%)                           |
| 18 Neonatal preterm birth   | 18 Self-harm other means    | 52.6% (30.8 to 75.1%)                   | 27.0% (8.9 to 45.7%)                      | 38.0% (18.2 to 59.8%)                              |
| 19 Age-related hearing loss | 19 Breast cancer            | 7.1% (-6.2 to 22.4%)                    | -10.9% (-21.9 to 1.9%)                    | -38.9% (-46.5 to -30.0%)                           |
| 20 Alcohol use disorders    | 20 Alcohol use disorders    | 42.6% (28.6 to 58.7%)                   | 18.7% (7.0 to 32.1%)                      | 16.6% (6.6 to 27.7%)                               |
| 21 Self-harm other means    | 21 Osteoarthritis           | 95.8% (87.3 to 104.9%)                  | 63.0% (55.9 to 70.5%)                     | 8.8% (3.7 to 14.2%)                                |
| 22 Acne vulgaris            | 22 Intracerebral hem        | 33.6% (20.1 to 48.7%)                   | 11.2% (0.0 to 23.8%)                      | -21.4% (-29.7 to -11.9%)                           |
| 23 Other cardiovascular     | 23 Lower respiratory infect | 33.2% (17.4 to 51.5%)                   | 10.8% (-2.3 to 26.1%)                     | -21.5% (-30.5 to -11.8%)                           |
| 24 Intracerebral hem        | 24 Other cardiovascular     | 22.8% (12.8 to 33.4%)                   | 2.2% (-6.1 to 11.0%)                      | -26.7% (-32.7 to -20.5%)                           |
| 25 Self-harm by firearm     | 25 Pancreatic cancer        | 83.4% (63.7 to 104.7%)                  | 52.6% (36.3 to 70.3%)                     | -2.2% (-12.8 to 9.2%)                              |
| 26 Lower respiratory infect | 28 Self-harm by firearm     |                                         |                                           |                                                    |
| 29 Osteoarthritis           | 30 Acne vulgaris            |                                         |                                           |                                                    |
| 31 Pancreatic cancer        | 36 Neonatal preterm birth   |                                         |                                           |                                                    |

Legend:

- Communicable, maternal, neonatal and nutritional
- Non-communicable
- Injuries

**Top 25 most-detailed causes of DALYs for 1990 and 2016 for both sexes in New Jersey**

| Leading causes 1990         | Leading causes 2016         | Mean % change number of DALYs 1990-2016 | Mean % change all-age DALY rate 1990-2016 | Mean % change age-standardized DALY rate 1990-2016 |
|-----------------------------|-----------------------------|-----------------------------------------|-------------------------------------------|----------------------------------------------------|
| 1 Ischemic heart disease    | 1 Ischemic heart disease    | -35.0% (-40.7 to -28.7%)                | -43.5% (-48.5 to -38.1%)                  | -54.6% (-58.7 to -50.1%)                           |
| 2 Lung cancer               | 2 Diabetes                  | 33.9% (23.0 to 44.4%)                   | 16.2% (6.8 to 25.4%)                      | -1.1% (-9.0 to 6.7%)                               |
| 3 HIV/AIDS other            | 3 Lung cancer               | -16.6% (-25.7 to -7.1%)                 | -27.6% (-35.5 to -19.4%)                  | -41.7% (-48.1 to -35.1%)                           |
| 4 Low back pain             | 4 Low back pain             | 4.5% (-8.7 to 18.8%)                    | -9.2% (-20.8 to 3.1%)                     | -15.5% (-26.5 to -4.3%)                            |
| 5 Diabetes                  | 5 COPD                      | 33.2% (23.3 to 44.4%)                   | 15.6% (7.0 to 25.4%)                      | -4.4% (-11.6 to 3.5%)                              |
| 6 COPD                      | 6 Opioid use disorders      | 43.7% (17.5 to 65.6%)                   | 24.7% (2.0 to 43.7%)                      | 43.9% (17.1 to 66.9%)                              |
| 7 Other musculoskeletal     | 7 Alzheimer disease         | 74.6% (51.9 to 96.9%)                   | 51.6% (31.9 to 70.9%)                     | 12.0% (-1.8 to 26.3%)                              |
| 8 Opioid use disorders      | 8 Other musculoskeletal     | 11.7% (2.0 to 23.2%)                    | -3.0% (-11.4 to 7.0%)                     | -5.7% (-13.4 to 3.2%)                              |
| 9 Colorectal cancer         | 9 Neck pain                 | 37.0% (22.9 to 53.2%)                   | 19.0% (6.7 to 33.0%)                      | 6.5% (-4.7 to 19.5%)                               |
| 10 Migraine                 | 10 Migraine                 | 9.0% (5.0 to 13.2%)                     | -5.4% (-8.9 to -1.7%)                     | -4.3% (-7.8 to -0.5%)                              |
| 11 Neonatal preterm birth   | 11 Anxiety disorders        | 17.0% (10.9 to 23.6%)                   | 1.6% (-3.7 to 7.3%)                       | 1.5% (-3.8 to 7.0%)                                |
| 12 Neck pain                | 12 Major depression         | 13.3% (4.9 to 22.0%)                    | -1.6% (-8.9 to 5.9%)                      | 1.0% (-6.1 to 8.3%)                                |
| 13 Major depression         | 13 Falls                    | 55.0% (40.0 to 64.7%)                   | 34.5% (21.5 to 43.0%)                     | 12.4% (2.1 to 18.8%)                               |
| 14 Anxiety disorders        | 14 Colorectal cancer        | -12.0% (-21.4 to -1.5%)                 | -23.6% (-31.8 to -14.5%)                  | -36.3% (-42.9 to -28.9%)                           |
| 15 Breast cancer            | 15 Ischemic stroke          | 2.5% (-5.6 to 11.0%)                    | -11.0% (-18.1 to -3.6%)                   | -28.6% (-34.5 to -22.8%)                           |
| 16 Ischemic stroke          | 16 Age-related hearing loss | 49.0% (43.7 to 55.6%)                   | 29.3% (24.7 to 35.1%)                     | 8.6% (4.9 to 13.2%)                                |
| 17 Motor vehicle road inj   | 17 Lower respiratory infect | 3.8% (-9.7 to 17.1%)                    | -9.9% (-21.6 to 1.6%)                     | -26.2% (-35.2 to -17.2%)                           |
| 18 Alzheimer disease        | 18 Breast cancer            | -17.2% (-29.1 to -4.7%)                 | -28.1% (-38.5 to -17.3%)                  | -40.9% (-49.5 to -32.0%)                           |
| 19 Lower respiratory infect | 19 Intracerebral hem        | -1.6% (-12.0 to 9.7%)                   | -14.6% (-23.6 to -4.8%)                   | -29.3% (-36.7 to -21.2%)                           |
| 20 Intracerebral hem        | 20 Other cardiovascular     | 3.2% (-5.3 to 12.4%)                    | -10.4% (-17.8 to -2.4%)                   | -23.8% (-30.0 to -17.1%)                           |
| 21 Falls                    | 21 Motor vehicle road inj   | -30.3% (-38.4 to -21.9%)                | -39.5% (-46.5 to -32.2%)                  | -38.8% (-46.2 to -31.3%)                           |
| 22 Age-related hearing loss | 22 Diabetes CKD             | 66.9% (54.3 to 81.1%)                   | 44.9% (33.9 to 57.2%)                     | 22.1% (12.9 to 32.4%)                              |
| 23 Other cardiovascular     | 23 Acne vulgaris            | 6.1% (2.4 to 10.0%)                     | -7.9% (-11.1 to -4.5%)                    | -0.4% (-4.0 to 3.2%)                               |
| 24 Acne vulgaris            | 24 Osteoarthritis           | 58.1% (49.7 to 67.2%)                   | 37.3% (30.0 to 45.1%)                     | 12.8% (6.7 to 19.2%)                               |
| 25 Dermatitis               | 25 Self-harm other means    | 29.5% (5.4 to 50.6%)                    | 12.4% (-8.5 to 30.7%)                     | 18.9% (-2.9 to 39.3%)                              |
| 26 Self-harm other means    | 26 Dermatitis               |                                         |                                           |                                                    |
| 31 Osteoarthritis           | 30 Neonatal preterm birth   |                                         |                                           |                                                    |
| 32 Diabetes CKD             | 38 HIV/AIDS other           |                                         |                                           |                                                    |

**Legend:**  
 Communicable, maternal, neonatal and nutritional  
 Non-communicable  
 Injuries



**Top 25 most-detailed causes of DALYs for 1990 and 2016 for both sexes in New Mexico**

| Leading causes 1990         | Leading causes 2016         | Mean % change number of DALYs 1990-2016 | Mean % change all-age DALY rate 1990-2016 | Mean % change age-standardized DALY rate 1990-2016 |
|-----------------------------|-----------------------------|-----------------------------------------|-------------------------------------------|----------------------------------------------------|
| 1 Ischemic heart disease    | 1 Ischemic heart disease    | 14.0% (0.5 to 28.2%)                    | -16.0% (-26.0 to -5.5%)                   | -42.9% (-49.9 to -35.4%)                           |
| 2 Motor vehicle road inj    | 2 Diabetes                  | 111.5% (94.1 to 129.7%)                 | 55.9% (43.0 to 69.3%)                     | 14.7% (5.1 to 24.7%)                               |
| 3 Low back pain             | 3 COPD                      | 99.0% (80.2 to 118.0%)                  | 46.7% (32.8 to 60.6%)                     | -0.7% (-10.0 to 8.7%)                              |
| 4 COPD                      | 4 Opioid use disorders      | 129.3% (64.5 to 167.3%)                 | 69.0% (21.3 to 97.0%)                     | 83.9% (31.2 to 114.7%)                             |
| 5 Diabetes                  | 5 Low back pain             | 49.2% (32.9 to 66.3%)                   | 10.0% (-2.0 to 22.6%)                     | -4.8% (-15.4 to 6.2%)                              |
| 6 Lung cancer               | 6 Alzheimer disease         | 129.6% (103.9 to 157.2%)                | 69.2% (50.3 to 89.5%)                     | 3.2% (-8.1 to 15.3%)                               |
| 7 Major depression          | 7 Lung cancer               | 43.1% (23.5 to 63.0%)                   | 5.5% (-9.0 to 20.1%)                      | -29.3% (-39.0 to -19.4%)                           |
| 8 Other musculoskeletal     | 8 Major depression          | 40.2% (31.6 to 48.9%)                   | 3.3% (-3.0 to 9.7%)                       | 3.9% (-2.1 to 10.0%)                               |
| 9 Migraine                  | 9 Falls                     | 128.3% (104.1 to 145.1%)                | 68.2% (50.4 to 80.6%)                     | 25.0% (13.6 to 33.4%)                              |
| 10 Opioid use disorders     | 10 Other musculoskeletal    | 50.1% (35.9 to 64.8%)                   | 10.6% (0.2 to 21.4%)                      | 0.8% (-8.2 to 10.1%)                               |
| 11 Anxiety disorders        | 11 Motor vehicle road inj   | -13.5% (-25.0 to -1.4%)                 | -36.3% (-44.7 to -27.4%)                  | -35.7% (-44.3 to -26.3%)                           |
| 12 Self-harm by firearm     | 12 Alcohol use disorders    | 77.3% (58.7 to 99.8%)                   | 30.6% (16.9 to 47.2%)                     | 27.2% (14.2 to 42.6%)                              |
| 13 Alcohol use disorders    | 13 Migraine                 | 35.3% (30.8 to 40.0%)                   | -0.3% (-3.6 to 3.2%)                      | -0.8% (-4.1 to 2.6%)                               |
| 14 Alzheimer disease        | 14 Neck pain                | 74.4% (53.6 to 97.4%)                   | 28.6% (13.2 to 45.5%)                     | 1.6% (-10.8 to 15.2%)                              |
| 15 Neonatal preterm birth   | 15 Anxiety disorders        | 39.7% (32.5 to 47.3%)                   | 2.9% (-2.3 to 8.6%)                       | 0.9% (-4.1 to 6.3%)                                |
| 16 Falls                    | 16 Ischemic stroke          | 71.4% (55.3 to 88.5%)                   | 26.3% (14.4 to 38.9%)                     | -17.0% (-24.7 to -8.7%)                            |
| 17 Neck pain                | 17 Age-related hearing loss | 111.5% (102.6 to 121.5%)                | 55.9% (49.3 to 63.3%)                     | 10.2% (5.6 to 15.4%)                               |
| 18 Ischemic stroke          | 18 Colorectal cancer        | 70.5% (47.9 to 94.0%)                   | 25.7% (9.0 to 43.0%)                      | -10.8% (-22.7 to 1.2%)                             |
| 19 Colorectal cancer        | 19 Self-harm other means    | 75.8% (45.2 to 107.5%)                  | 29.6% (7.0 to 52.9%)                      | 36.0% (12.0 to 60.8%)                              |
| 20 Self-harm other means    | 20 Self-harm by firearm     | 16.0% (-4.1 to 37.4%)                   | -14.5% (-29.3 to 1.3%)                    | -15.1% (-29.7 to 1.3%)                             |
| 21 Lower respiratory infect | 21 Cirrhosis alcohol        | 156.9% (118.9 to 198.9%)                | 89.4% (61.3 to 120.3%)                    | 51.8% (29.1 to 76.9%)                              |
| 22 Acne vulgaris            | 22 Lower respiratory infect | 53.2% (32.7 to 74.4%)                   | 12.9% (-2.2 to 28.6%)                     | -13.6% (-24.7 to -1.9%)                            |
| 23 Pedestrian road inj      | 23 Breast cancer            | 41.9% (16.7 to 72.2%)                   | 4.6% (-14.0 to 26.9%)                     | -22.4% (-36.3 to -6.1%)                            |
| 24 Breast cancer            | 24 Other drug use disorders | 191.8% (120.8 to 379.7%)                | 115.0% (62.8 to 253.5%)                   | 128.3% (71.2 to 280.8%)                            |
| 25 Age-related hearing loss | 25 Intracerebral hem        | 63.7% (42.5 to 86.1%)                   | 20.6% (5.1 to 37.2%)                      | -10.1% (-21.8 to 2.9%)                             |
| 27 Intracerebral hem        | 30 Acne vulgaris            |                                         |                                           |                                                    |
| 32 Cirrhosis alcohol        | 32 Neonatal preterm birth   |                                         |                                           |                                                    |
| 44 Other drug use disorders | 43 Pedestrian road inj      |                                         |                                           |                                                    |

**Legend:**

- Communicable, maternal, neonatal and nutritional
- Non-communicable
- Injuries

**Top 25 most-detailed causes of DALYs for 1990 and 2016 for both sexes in New York**

| Leading causes 1990         | Leading causes 2016         | Mean % change number of DALYs 1990-2016 | Mean % change all-age DALY rate 1990-2016 | Mean % change age-standardized DALY rate 1990-2016 |
|-----------------------------|-----------------------------|-----------------------------------------|-------------------------------------------|----------------------------------------------------|
| 1 Ischemic heart disease    | 1 Ischemic heart disease    | -38.2% (-44.5 to -31.0%)                | -43.5% (-49.3 to -37.0%)                  | -54.4% (-59.2 to -49.0%)                           |
| 2 HIV/AIDS other            | 2 Diabetes                  | 48.4% (36.1 to 60.3%)                   | 35.6% (24.3 to 46.5%)                     | 14.3% (5.0 to 23.5%)                               |
| 3 Lung cancer               | 3 Lung cancer               | -14.3% (-25.4 to -1.8%)                 | -21.7% (-31.8 to -10.3%)                  | -37.8% (-45.8 to -28.6%)                           |
| 4 Low back pain             | 4 Low back pain             | 4.8% (-8.1 to 18.8%)                    | -4.2% (-16.0 to 8.6%)                     | -12.7% (-23.8 to -0.8%)                            |
| 5 Major depression          | 5 COPD                      | 26.7% (17.2 to 37.7%)                   | 15.8% (7.1 to 25.8%)                      | -4.8% (-12.1 to 3.4%)                              |
| 6 Diabetes                  | 6 Major depression          | 5.7% (-0.7 to 12.3%)                    | -3.4% (-9.3 to 2.7%)                      | -2.7% (-8.8 to 3.4%)                               |
| 7 COPD                      | 7 Alzheimer disease         | 56.8% (37.8 to 79.4%)                   | 43.3% (25.9 to 63.9%)                     | 10.7% (-2.5 to 26.6%)                              |
| 8 Other musculoskeletal     | 8 Other musculoskeletal     | 18.4% (8.6 to 28.7%)                    | 8.2% (-0.8 to 17.6%)                      | 3.4% (-4.7 to 12.3%)                               |
| 9 Migraine                  | 9 Opioid use disorders      | 22.4% (5.1 to 37.2%)                    | 11.9% (-4.0 to 25.3%)                     | 20.6% (3.2 to 35.3%)                               |
| 10 Opioid use disorders     | 10 Neck pain                | 36.2% (21.7 to 52.8%)                   | 24.4% (11.2 to 39.6%)                     | 9.7% (-2.2 to 24.0%)                               |
| 11 Colorectal cancer        | 11 Migraine                 | 9.3% (5.2 to 13.4%)                     | -0.1% (-3.8 to 3.7%)                      | -0.7% (-4.3 to 3.1%)                               |
| 12 Neck pain                | 12 Anxiety disorders        | 11.8% (5.6 to 17.9%)                    | 2.1% (-3.5 to 7.7%)                       | 1.4% (-4.3 to 6.7%)                                |
| 13 Alzheimer disease        | 13 Falls                    | 25.0% (15.0 to 32.5%)                   | 14.2% (5.1 to 21.1%)                      | -4.7% (-11.4 to 0.6%)                              |
| 14 Anxiety disorders        | 14 Age-related hearing loss | 40.4% (35.5 to 46.1%)                   | 28.3% (23.8 to 33.5%)                     | 8.2% (4.7 to 12.7%)                                |
| 15 Motor vehicle road inj   | 15 Colorectal cancer        | -20.3% (-30.5 to -9.7%)                 | -27.2% (-36.5 to -17.5%)                  | -39.4% (-47.3 to -31.2%)                           |
| 16 Neonatal preterm birth   | 16 Lower respiratory infect | -19.1% (-30.2 to -7.3%)                 | -26.1% (-36.2 to -15.3%)                  | -39.0% (-47.1 to -30.8%)                           |
| 17 Lower respiratory infect | 17 Ischemic stroke          | -12.8% (-22.2 to -4.3%)                 | -20.3% (-28.9 to -12.5%)                  | -35.1% (-42.0 to -28.4%)                           |
| 18 Breast cancer            | 18 Acne vulgaris            | -1.0% (-4.3 to 2.0%)                    | -9.6% (-12.5 to -6.8%)                    | -1.6% (-4.7 to 1.5%)                               |
| 19 Ischemic stroke          | 19 Breast cancer            | -26.9% (-39.7 to -12.6%)                | -33.2% (-44.9 to -20.1%)                  | -45.2% (-54.9 to -34.2%)                           |
| 20 Violence firearm         | 20 Osteoarthritis           | 53.6% (45.9 to 61.5%)                   | 40.4% (33.3 to 47.6%)                     | 15.5% (9.6 to 21.6%)                               |
| 21 Falls                    | 21 Dermatitis               | 9.2% (5.7 to 12.7%)                     | -0.2% (-3.4 to 3.0%)                      | 4.1% (0.7 to 7.6%)                                 |
| 22 Intracerebral hem        | 22 Alcohol use disorders    | -4.2% (-13.6 to 6.4%)                   | -12.5% (-21.0 to -2.8%)                   | -13.7% (-21.9 to -4.7%)                            |
| 23 Acne vulgaris            | 23 Self-harm other means    | 3.4% (-30.9 to 26.1%)                   | -5.6% (-36.9 to 15.3%)                    | -2.6% (-35.0 to 19.6%)                             |
| 24 Age-related hearing loss | 24 Intracerebral hem        | -21.3% (-30.4 to -11.4%)                | -28.1% (-36.4 to -19.0%)                  | -40.1% (-47.1 to -32.7%)                           |
| 25 Alcohol use disorders    | 25 Diabetes CKD             | 51.4% (38.1 to 65.4%)                   | 38.4% (26.2 to 51.1%)                     | 15.9% (6.1 to 26.2%)                               |
| 26 Dermatitis               | 26 Motor vehicle road inj   |                                         |                                           |                                                    |
| 27 Self-harm other means    | 31 Neonatal preterm birth   |                                         |                                           |                                                    |
| 30 Osteoarthritis           | 35 HIV/AIDS other           |                                         |                                           |                                                    |
| 37 Diabetes CKD             | 44 Violence firearm         |                                         |                                           |                                                    |

**Legend:**

- Communicable, maternal, neonatal and nutritional
- Non-communicable
- Injuries

Top 25 most-detailed causes of DALYs for 1990 and 2016 for both sexes in North Carolina

| Leading causes 1990         | Leading causes 2016         | Mean % change number of DALYs 1990-2016 | Mean % change all-age DALY rate 1990-2016 | Mean % change age-standardized DALY rate 1990-2016 |
|-----------------------------|-----------------------------|-----------------------------------------|-------------------------------------------|----------------------------------------------------|
| 1 Ischemic heart disease    | 1 Ischemic heart disease    | -7.5% (-14.7 to 0.3%)                   | -38.9% (-43.7 to -33.8%)                  | -52.1% (-55.9 to -47.9%)                           |
| 2 Lung cancer               | 2 Lung cancer               | 47.5% (33.7 to 61.8%)                   | -2.6% (-11.7 to 6.9%)                     | -26.4% (-33.3 to -19.4%)                           |
| 3 Motor vehicle road inj    | 3 COPD                      | 127.8% (111.7 to 146.4%)                | 50.4% (39.8 to 62.7%)                     | 16.5% (8.4 to 25.8%)                               |
| 4 Low back pain             | 4 Diabetes                  | 107.8% (93.4 to 121.9%)                 | 37.2% (27.7 to 46.5%)                     | 10.4% (2.7 to 17.9%)                               |
| 5 Diabetes                  | 5 Low back pain             | 37.8% (21.3 to 55.1%)                   | -9.0% (-19.9 to 2.4%)                     | -17.4% (-27.3 to -7.2%)                            |
| 6 COPD                      | 6 Ischemic stroke           | 48.6% (37.8 to 60.1%)                   | -1.9% (-9.0 to 5.7%)                      | -24.5% (-29.8 to -18.8%)                           |
| 7 Ischemic stroke           | 7 Alzheimer disease         | 109.9% (89.1 to 132.0%)                 | 38.6% (24.8 to 53.2%)                     | 1.4% (-8.1 to 11.6%)                               |
| 8 Other musculoskeletal     | 8 Opioid use disorders      | 132.7% (86.2 to 167.3%)                 | 53.7% (23.0 to 76.5%)                     | 73.3% (39.1 to 99.0%)                              |
| 9 Migraine                  | 9 Other musculoskeletal     | 49.0% (34.2 to 65.2%)                   | -1.6% (-11.4 to 9.0%)                     | -5.6% (-14.6 to 3.8%)                              |
| 10 Neonatal preterm birth   | 10 Motor vehicle road inj   | -3.4% (-11.8 to 5.3%)                   | -36.3% (-41.8 to -30.5%)                  | -34.1% (-39.7 to -28.0%)                           |
| 11 Major depression         | 11 Migraine                 | 48.4% (42.8 to 54.0%)                   | -2.0% (-5.7 to 1.7%)                      | 0.2% (-3.4 to 3.9%)                                |
| 12 Alzheimer disease        | 12 Major depression         | 64.1% (52.0 to 76.4%)                   | 8.3% (0.4 to 16.5%)                       | 13.1% (4.9 to 21.2%)                               |
| 13 Intracerebral hem        | 13 Falls                    | 132.7% (105.5 to 149.0%)                | 53.7% (35.7 to 64.4%)                     | 24.3% (11.1 to 31.9%)                              |
| 14 Colorectal cancer        | 14 Lower respiratory infect | 73.2% (55.5 to 93.7%)                   | 14.3% (2.7 to 27.9%)                      | -9.1% (-18.5 to 1.3%)                              |
| 15 Opioid use disorders     | 15 Neck pain                | 73.9% (51.2 to 97.1%)                   | 14.8% (-0.2 to 30.1%)                     | -1.7% (-14.3 to 11.6%)                             |
| 16 Anxiety disorders        | 16 Intracerebral hem        | 52.1% (38.5 to 66.4%)                   | 0.4% (-8.6 to 9.9%)                       | -19.0% (-26.2 to -11.3%)                           |
| 17 Lower respiratory infect | 17 Age-related hearing loss | 109.5% (101.3 to 119.6%)                | 38.4% (32.9 to 45.0%)                     | 11.2% (6.9 to 16.5%)                               |
| 18 Neck pain                | 18 Colorectal cancer        | 45.8% (32.4 to 61.5%)                   | -3.7% (-12.6 to 6.6%)                     | -23.8% (-30.9 to -16.0%)                           |
| 19 Breast cancer            | 19 Anxiety disorders        | 51.3% (42.6 to 60.1%)                   | -0.1% (-5.8 to 5.7%)                      | 0.7% (-4.9 to 6.9%)                                |
| 20 Self-harm by firearm     | 20 Diabetes CKD             | 180.3% (160.2 to 201.8%)                | 85.1% (71.8 to 99.2%)                     | 48.9% (38.7 to 60.0%)                              |
| 21 Alcohol use disorders    | 21 Breast cancer            | 30.6% (13.3 to 49.0%)                   | -13.8% (-25.2 to -1.6%)                   | -30.9% (-40.1 to -21.1%)                           |
| 22 Falls                    | 22 Neonatal preterm birth   | -9.9% (-22.1 to 3.6%)                   | -40.5% (-48.6 to -31.6%)                  | -28.5% (-38.0 to -17.7%)                           |
| 23 Violence firearm         | 23 Self-harm by firearm     | 18.6% (1.5 to 37.4%)                    | -21.7% (-33.0 to -9.3%)                   | -20.1% (-31.5 to -7.5%)                            |
| 24 Age-related hearing loss | 24 Alcohol use disorders    | 17.8% (7.9 to 28.5%)                    | -22.2% (-28.8 to -15.2%)                  | -22.8% (-29.1 to -16.0%)                           |
| 25 Acne vulgaris            | 25 Other cardiovascular     | 44.7% (33.4 to 56.8%)                   | -4.5% (-11.9 to 3.5%)                     | -20.8% (-26.8 to -14.0%)                           |
| 27 Other cardiovascular     | 26 Acne vulgaris            |                                         |                                           |                                                    |
| 32 Diabetes CKD             | 32 Violence firearm         |                                         |                                           |                                                    |

Legend:

- Communicable, maternal, neonatal and nutritional
- Non-communicable
- Injuries

**Top 25 most-detailed causes of DALYs for 1990 and 2016 for both sexes in North Dakota**

| Leading causes 1990         | Leading causes 2016         | Mean % change number of DALYs 1990-2016 | Mean % change all-age DALY rate 1990-2016 | Mean % change age-standardized DALY rate 1990-2016 |
|-----------------------------|-----------------------------|-----------------------------------------|-------------------------------------------|----------------------------------------------------|
| 1 Ischemic heart disease    | 1 Ischemic heart disease    | -32.7% (-39.6 to -24.3%)                | -44.1% (-49.8 to -37.1%)                  | -48.0% (-53.7 to -41.2%)                           |
| 2 Low back pain             | 2 Lung cancer               | 21.1% (5.7 to 37.6%)                    | 0.6% (-12.1 to 14.4%)                     | -12.1% (-23.4 to 0.1%)                             |
| 3 Lung cancer               | 3 Low back pain             | 13.5% (2.0 to 25.2%)                    | -5.7% (-15.3 to 4.1%)                     | -10.2% (-19.5 to -0.6%)                            |
| 4 Other musculoskeletal     | 4 Diabetes                  | 55.5% (43.9 to 67.7%)                   | 29.2% (19.6 to 39.4%)                     | 19.4% (10.5 to 28.7%)                              |
| 5 Motor vehicle road inj    | 5 Other musculoskeletal     | 32.6% (22.1 to 43.7%)                   | 10.2% (1.5 to 19.4%)                      | 6.0% (-2.2 to 14.7%)                               |
| 6 Alzheimer disease         | 6 COPD                      | 52.3% (38.6 to 66.7%)                   | 26.6% (15.2 to 38.5%)                     | 17.4% (6.9 to 28.6%)                               |
| 7 Diabetes                  | 7 Alzheimer disease         | 37.6% (23.2 to 52.0%)                   | 14.3% (2.4 to 26.4%)                      | 3.8% (-6.3 to 14.3%)                               |
| 8 COPD                      | 8 Motor vehicle road inj    | 16.5% (2.3 to 31.6%)                    | -3.2% (-15.0 to 9.4%)                     | -7.4% (-18.6 to 4.9%)                              |
| 9 Ischemic stroke           | 9 Major depression          | 26.5% (18.8 to 34.6%)                   | 5.1% (-1.2 to 11.9%)                      | 4.6% (-1.6 to 11.4%)                               |
| 10 Migraine                 | 10 Falls                    | 85.4% (66.2 to 98.3%)                   | 54.1% (38.1 to 64.8%)                     | 39.1% (25.9 to 48.5%)                              |
| 11 Major depression         | 11 Migraine                 | 17.4% (13.5 to 21.2%)                   | -2.4% (-5.7 to 0.7%)                      | -4.0% (-7.1 to -0.9%)                              |
| 12 Anxiety disorders        | 12 Anxiety disorders        | 22.6% (16.4 to 29.2%)                   | 1.9% (-3.3 to 7.4%)                       | 0.6% (-4.6 to 6.0%)                                |
| 13 Colorectal cancer        | 13 Ischemic stroke          | 5.9% (-3.4 to 15.4%)                    | -12.0% (-19.7 to -4.1%)                   | -17.4% (-24.2 to -9.5%)                            |
| 14 Neck pain                | 14 Age-related hearing loss | 35.0% (29.8 to 40.5%)                   | 12.2% (7.9 to 16.8%)                      | 5.6% (1.8 to 10.2%)                                |
| 15 Age-related hearing loss | 15 Colorectal cancer        | 3.1% (-10.1 to 17.4%)                   | -14.3% (-25.3 to -2.4%)                   | -21.3% (-31.6 to -10.2%)                           |
| 16 Falls                    | 16 Neck pain                | 22.5% (12.0 to 34.5%)                   | 1.8% (-6.9 to 11.8%)                      | -6.4% (-14.7 to 2.6%)                              |
| 17 Breast cancer            | 17 Opioid use disorders     | 197.2% (156.8 to 241.6%)                | 147.0% (113.4 to 183.9%)                  | 146.3% (113.2 to 183.6%)                           |
| 18 Neonatal preterm birth   | 18 Alcohol use disorders    | 53.2% (38.9 to 69.2%)                   | 27.3% (15.5 to 40.7%)                     | 21.8% (10.3 to 34.5%)                              |
| 19 Lower respiratory infect | 19 Self-harm other means    | 97.5% (52.8 to 138.0%)                  | 64.1% (27.0 to 97.9%)                     | 61.6% (25.8 to 95.1%)                              |
| 20 Intracerebral hem        | 20 Intracerebral hem        | 25.2% (11.1 to 40.5%)                   | 4.0% (-7.6 to 16.8%)                      | -6.2% (-16.6 to 5.5%)                              |
| 21 Acne vulgaris            | 21 Self-harm by firearm     | 48.6% (11.8 to 83.8%)                   | 23.5% (-7.1 to 52.8%)                     | 18.1% (-11.1 to 46.5%)                             |
| 22 Alcohol use disorders    | 22 Neonatal preterm birth   | 2.3% (-12.9 to 18.9%)                   | -15.0% (-27.6 to -1.2%)                   | -18.8% (-31.3 to -4.9%)                            |
| 23 Other cardiovascular     | 23 Lower respiratory infect | 11.0% (-3.2 to 26.5%)                   | -7.8% (-19.5 to 5.2%)                     | -16.1% (-26.6 to -4.7%)                            |
| 24 Prostate cancer          | 24 Osteoarthritis           | 44.7% (39.8 to 49.6%)                   | 20.2% (16.2 to 24.4%)                     | 8.0% (4.2 to 12.0%)                                |
| 25 Self-harm by firearm     | 25 Breast cancer            | -8.9% (-24.3 to 9.8%)                   | -24.2% (-37.1 to -8.7%)                   | -32.7% (-44.6 to -18.5%)                           |
| 26 Osteoarthritis           | 26 Acne vulgaris            |                                         |                                           |                                                    |
| 29 Self-harm other means    | 29 Other cardiovascular     |                                         |                                           |                                                    |
| 36 Opioid use disorders     | 38 Prostate cancer          |                                         |                                           |                                                    |

**Legend:**

Communicable, maternal, neonatal and nutritional

Non-communicable

Injuries

Top 25 most-detailed causes of DALYs for 1990 and 2016 for both sexes in Ohio

| Leading causes 1990         | Leading causes 2016         | Mean % change number of DALYs 1990-2016 | Mean % change all-age DALY rate 1990-2016 | Mean % change age-standardized DALY rate 1990-2016 |
|-----------------------------|-----------------------------|-----------------------------------------|-------------------------------------------|----------------------------------------------------|
| 1 Ischemic heart disease    | 1 Ischemic heart disease    | -28.3% (-33.9 to -22.6%)                | -32.9% (-38.1 to -27.5%)                  | -47.2% (-51.4 to -42.9%)                           |
| 2 Lung cancer               | 2 Lung cancer               | 8.4% (-0.9 to 19.9%)                    | 1.6% (-7.2 to 12.3%)                      | -22.9% (-29.5 to -14.7%)                           |
| 3 Low back pain             | 3 COPD                      | 66.5% (54.5 to 78.1%)                   | 56.0% (44.7 to 66.9%)                     | 21.7% (13.0 to 30.0%)                              |
| 4 COPD                      | 4 Diabetes                  | 49.5% (39.7 to 59.9%)                   | 40.1% (30.9 to 49.9%)                     | 13.1% (5.9 to 20.9%)                               |
| 5 Diabetes                  | 5 Opioid use disorders      | 55.1% (18.1 to 79.9%)                   | 45.3% (10.6 to 68.6%)                     | 62.3% (23.4 to 88.3%)                              |
| 6 Opioid use disorders      | 6 Low back pain             | 4.8% (-8.2 to 17.7%)                    | -1.8% (-14.0 to 10.3%)                    | -11.2% (-22.4 to 0.5%)                             |
| 7 Motor vehicle road inj    | 7 Alzheimer disease         | 51.3% (38.0 to 65.6%)                   | 41.8% (29.3 to 55.2%)                     | 2.9% (-5.9 to 12.4%)                               |
| 8 Other musculoskeletal     | 8 Other musculoskeletal     | 9.6% (-0.5 to 20.1%)                    | 2.7% (-6.7 to 12.6%)                      | -2.0% (-10.7 to 6.8%)                              |
| 9 Major depression          | 9 Major depression          | 7.4% (-0.3 to 15.9%)                    | 0.6% (-6.6 to 8.6%)                       | 3.0% (-4.5 to 11.0%)                               |
| 10 Migraine                 | 10 Neck pain                | 36.1% (20.6 to 52.6%)                   | 27.5% (13.0 to 43.0%)                     | 8.8% (-3.7 to 22.2%)                               |
| 11 Alzheimer disease        | 11 Ischemic stroke          | 23.1% (12.5 to 33.1%)                   | 15.3% (5.4 to 24.8%)                      | -11.7% (-18.9 to -4.6%)                            |
| 12 Colorectal cancer        | 12 Migraine                 | 4.7% (1.3 to 8.4%)                      | -1.9% (-5.1 to 1.6%)                      | -0.5% (-3.8 to 3.0%)                               |
| 13 Ischemic stroke          | 13 Falls                    | 77.9% (59.5 to 89.9%)                   | 66.7% (49.4 to 77.9%)                     | 33.1% (21.4 to 41.0%)                              |
| 14 Neck pain                | 14 Anxiety disorders        | 8.1% (2.4 to 14.0%)                     | 1.3% (-4.1 to 6.8%)                       | 1.1% (-4.2 to 6.7%)                                |
| 15 Anxiety disorders        | 15 Colorectal cancer        | -1.1% (-10.2 to 9.4%)                   | -7.3% (-15.9 to 2.5%)                     | -26.1% (-33.2 to -18.2%)                           |
| 16 Neonatal preterm birth   | 16 Age-related hearing loss | 47.4% (41.5 to 53.6%)                   | 38.1% (32.6 to 43.9%)                     | 10.6% (6.4 to 15.4%)                               |
| 17 Breast cancer            | 17 Motor vehicle road inj   | -27.0% (-33.9 to -19.3%)                | -31.6% (-38.0 to -24.4%)                  | -31.2% (-37.8 to -23.7%)                           |
| 18 Lower respiratory infect | 18 Lower respiratory infect | 33.7% (20.0 to 48.4%)                   | 25.3% (12.4 to 39.0%)                     | -0.6% (-10.6 to 9.4%)                              |
| 19 Intracerebral hem        | 19 Intracerebral hem        | 29.0% (17.3 to 41.7%)                   | 20.9% (10.0 to 32.7%)                     | -2.7% (-11.3 to 6.4%)                              |
| 20 Falls                    | 20 Breast cancer            | -9.5% (-20.9 to 2.3%)                   | -15.2% (-25.9 to -4.2%)                   | -32.5% (-40.9 to -23.7%)                           |
| 21 Age-related hearing loss | 21 Osteoarthritis           | 54.6% (46.7 to 62.6%)                   | 44.9% (37.5 to 52.4%)                     | 14.3% (8.3 to 20.2%)                               |
| 22 Acne vulgaris            | 22 Diabetes CKD             | 101.8% (86.8 to 117.8%)                 | 89.1% (75.1 to 104.0%)                    | 53.3% (42.7 to 65.1%)                              |
| 23 Other cardiovascular     | 23 Neonatal preterm birth   | -33.4% (-41.3 to -24.1%)                | -37.6% (-45.0 to -28.9%)                  | -24.9% (-33.7 to -14.9%)                           |
| 24 Self-harm by firearm     | 24 Self-harm other means    | 42.2% (23.1 to 61.7%)                   | 33.3% (15.3 to 51.5%)                     | 41.9% (22.4 to 61.4%)                              |
| 25 Osteoarthritis           | 25 Other cardiovascular     | 13.6% (4.4 to 23.1%)                    | 6.4% (-2.2 to 15.3%)                      | -11.6% (-18.7 to -4.3%)                            |
| 29 Self-harm other means    | 29 Self-harm by firearm     |                                         |                                           |                                                    |
| 35 Diabetes CKD             | 30 Acne vulgaris            |                                         |                                           |                                                    |

Legend:

- Communicable, maternal, neonatal and nutritional
- Non-communicable
- Injuries

**Top 25 most-detailed causes of DALYs for 1990 and 2016 for both sexes in Oklahoma**

| Leading causes 1990         | Leading causes 2016         | Mean % change number of DALYs 1990-2016 | Mean % change all-age DALY rate 1990-2016 | Mean % change age-standardized DALY rate 1990-2016 |
|-----------------------------|-----------------------------|-----------------------------------------|-------------------------------------------|----------------------------------------------------|
| 1 Ischemic heart disease    | 1 Ischemic heart disease    | -5.3% (-12.4 to 2.3%)                   | -23.5% (-29.3 to -17.4%)                  | -32.5% (-37.9 to -27.0%)                           |
| 2 Lung cancer               | 2 COPD                      | 100.0% (86.1 to 115.9%)                 | 61.5% (50.3 to 74.3%)                     | 38.2% (28.8 to 48.8%)                              |
| 3 Low back pain             | 3 Lung cancer               | 24.1% (12.4 to 36.3%)                   | 0.2% (-9.2 to 10.1%)                      | -18.1% (-25.8 to -10.0%)                           |
| 4 Motor vehicle road inj    | 4 Diabetes                  | 92.0% (80.2 to 105.0%)                  | 55.0% (45.6 to 65.6%)                     | 34.9% (26.6 to 43.3%)                              |
| 5 COPD                      | 5 Low back pain             | 27.2% (13.2 to 41.4%)                   | 2.8% (-8.6 to 14.2%)                      | -3.5% (-14.6 to 7.4%)                              |
| 6 Diabetes                  | 6 Opioid use disorders      | 82.0% (40.7 to 110.8%)                  | 47.0% (13.6 to 70.3%)                     | 55.0% (20.2 to 79.5%)                              |
| 7 Major depression          | 7 Motor vehicle road inj    | 3.2% (-5.4 to 12.3%)                    | -16.6% (-23.6 to -9.3%)                   | -17.1% (-24.2 to -9.6%)                            |
| 8 Alzheimer disease         | 8 Alzheimer disease         | 48.7% (34.8 to 64.3%)                   | 20.1% (8.9 to 32.7%)                      | 7.5% (-2.2 to 18.4%)                               |
| 9 Ischemic stroke           | 9 Major depression          | 27.1% (19.6 to 35.3%)                   | 2.6% (-3.4 to 9.3%)                       | 3.6% (-2.6 to 10.2%)                               |
| 10 Opioid use disorders     | 10 Other musculoskeletal    | 28.4% (16.7 to 40.7%)                   | 3.7% (-5.7 to 13.6%)                      | 1.1% (-7.5 to 11.1%)                               |
| 11 Other musculoskeletal    | 11 Ischemic stroke          | 24.5% (14.4 to 34.7%)                   | 0.5% (-7.6 to 8.8%)                       | -10.3% (-17.1 to -3.0%)                            |
| 12 Migraine                 | 12 Neck pain                | 44.3% (30.7 to 59.3%)                   | 16.5% (5.6 to 28.6%)                      | 5.8% (-4.3 to 17.6%)                               |
| 13 Neck pain                | 13 Falls                    | 103.3% (77.9 to 118.5%)                 | 64.2% (43.6 to 76.5%)                     | 41.3% (25.5 to 51.3%)                              |
| 14 Anxiety disorders        | 14 Migraine                 | 24.3% (20.1 to 28.8%)                   | 0.4% (-3.0 to 4.0%)                       | 0.4% (-3.1 to 4.0%)                                |
| 15 Colorectal cancer        | 15 Anxiety disorders        | 25.6% (19.5 to 32.4%)                   | 1.4% (-3.5 to 6.9%)                       | 0.9% (-4.0 to 6.3%)                                |
| 16 Lower respiratory infect | 16 Colorectal cancer        | 31.6% (18.8 to 44.9%)                   | 6.3% (-4.1 to 17.1%)                      | -7.3% (-16.3 to 2.3%)                              |
| 17 Breast cancer            | 17 Lower respiratory infect | 35.0% (20.5 to 51.1%)                   | 9.1% (-2.7 to 22.0%)                      | -1.8% (-11.9 to 8.9%)                              |
| 18 Self-harm by firearm     | 18 Intracerebral hem        | 46.1% (31.9 to 60.6%)                   | 18.0% (6.5 to 29.7%)                      | 3.3% (-6.5 to 13.1%)                               |
| 19 Intracerebral hem        | 19 Age-related hearing loss | 51.7% (46.0 to 58.0%)                   | 22.5% (17.9 to 27.6%)                     | 9.1% (4.9 to 13.7%)                                |
| 20 Falls                    | 20 Self-harm by firearm     | 32.8% (9.3 to 52.7%)                    | 7.3% (-11.8 to 23.3%)                     | 7.0% (-12.4 to 23.0%)                              |
| 21 Neonatal preterm birth   | 21 Breast cancer            | 12.9% (-2.4 to 28.8%)                   | -8.8% (-21.1 to 4.0%)                     | -22.5% (-33.0 to -11.5%)                           |
| 22 Age-related hearing loss | 22 Diabetes CKD             | 128.5% (110.4 to 149.3%)                | 84.6% (70.0 to 101.3%)                    | 64.3% (52.1 to 78.9%)                              |
| 23 Acne vulgaris            | 23 Self-harm other means    | 100.7% (59.7 to 131.5%)                 | 62.1% (29.0 to 86.9%)                     | 67.3% (32.8 to 93.4%)                              |
| 24 Other cardiovascular     | 24 Alcohol use disorders    | 55.0% (40.1 to 72.9%)                   | 25.2% (13.2 to 39.7%)                     | 21.6% (10.4 to 35.0%)                              |
| 25 Alcohol use disorders    | 25 Neonatal preterm birth   | 6.4% (-7.6 to 20.4%)                    | -14.0% (-25.4 to -2.7%)                   | -5.7% (-18.2 to 7.1%)                              |
| 29 Osteoarthritis           | 26 Osteoarthritis           |                                         |                                           |                                                    |
| 30 Self-harm other means    | 27 Other cardiovascular     |                                         |                                           |                                                    |
| 36 Diabetes CKD             | 29 Acne vulgaris            |                                         |                                           |                                                    |

**Legend:**

- Communicable, maternal, neonatal and nutritional
- Non-communicable
- Injuries

Top 25 most-detailed causes of DALYs for 1990 and 2016 for both sexes in Oregon

| Leading causes 1990         | Leading causes 2016         | Mean % change number of DALYs 1990-2016 | Mean % change all-age DALY rate 1990-2016 | Mean % change age-standardized DALY rate 1990-2016 |
|-----------------------------|-----------------------------|-----------------------------------------|-------------------------------------------|----------------------------------------------------|
| 1 Ischemic heart disease    | 1 Ischemic heart disease    | -25.6% (-31.8 to -19.0%)                | -47.6% (-51.9 to -42.9%)                  | -58.5% (-62.1 to -54.6%)                           |
| 2 Lung cancer               | 2 COPD                      | 75.0% (61.6 to 89.6%)                   | 23.4% (13.9 to 33.7%)                     | -2.5% (-9.8 to 5.4%)                               |
| 3 Low back pain             | 3 Lung cancer               | 23.3% (11.3 to 36.2%)                   | -13.1% (-21.5 to -3.9%)                   | -35.2% (-41.5 to -28.6%)                           |
| 4 COPD                      | 4 Diabetes                  | 111.0% (96.1 to 125.9%)                 | 48.8% (38.3 to 59.3%)                     | 19.5% (11.0 to 28.0%)                              |
| 5 Motor vehicle road inj    | 5 Low back pain             | 37.5% (21.0 to 55.4%)                   | -3.0% (-14.6 to 9.6%)                     | -13.1% (-23.9 to -1.9%)                            |
| 6 Opioid use disorders      | 6 Opioid use disorders      | 56.9% (34.7 to 74.9%)                   | 10.7% (-5.0 to 23.3%)                     | 18.3% (1.6 to 31.7%)                               |
| 7 Ischemic stroke           | 7 Alzheimer disease         | 92.6% (71.8 to 114.0%)                  | 35.8% (21.2 to 50.9%)                     | 6.9% (-3.9 to 18.3%)                               |
| 8 Major depression          | 8 Other musculoskeletal     | 58.1% (44.2 to 72.1%)                   | 11.5% (1.7 to 21.4%)                      | 5.2% (-3.5 to 15.1%)                               |
| 9 Diabetes                  | 9 Major depression          | 49.4% (39.3 to 60.1%)                   | 5.4% (-1.7 to 12.9%)                      | 7.8% (0.4 to 15.6%)                                |
| 10 Other musculoskeletal    | 10 Migraine                 | 42.1% (37.6 to 46.8%)                   | 0.2% (-3.0 to 3.5%)                       | -0.1% (-3.3 to 2.9%)                               |
| 11 Migraine                 | 11 Ischemic stroke          | 28.0% (17.2 to 39.5%)                   | -9.7% (-17.4 to -1.6%)                    | -27.4% (-33.5 to -21.2%)                           |
| 12 Alzheimer disease        | 12 Falls                    | 116.2% (90.0 to 131.7%)                 | 52.4% (34.0 to 63.4%)                     | 22.5% (9.6 to 30.4%)                               |
| 13 Colorectal cancer        | 13 Neck pain                | 62.4% (43.0 to 83.1%)                   | 14.5% (0.8 to 29.1%)                      | -2.7% (-14.4 to 9.7%)                              |
| 14 Neck pain                | 14 Age-related hearing loss | 90.9% (83.4 to 99.4%)                   | 34.7% (29.4 to 40.6%)                     | 10.6% (6.1 to 15.5%)                               |
| 15 Anxiety disorders        | 15 Colorectal cancer        | 34.2% (21.2 to 48.2%)                   | -5.3% (-14.5 to 4.6%)                     | -24.5% (-32.1 to -16.6%)                           |
| 16 Breast cancer            | 16 Alcohol use disorders    | 63.8% (48.8 to 81.4%)                   | 15.6% (4.9 to 28.0%)                      | 7.8% (-1.5 to 18.4%)                               |
| 17 Falls                    | 17 Anxiety disorders        | 45.2% (36.8 to 54.9%)                   | 2.4% (-3.5 to 9.2%)                       | 2.1% (-3.9 to 8.6%)                                |
| 18 Self-harm by firearm     | 18 Motor vehicle road inj   | -25.3% (-32.6 to -15.1%)                | -47.3% (-52.5 to -40.1%)                  | -49.6% (-54.8 to -42.4%)                           |
| 19 Alcohol use disorders    | 19 Intracerebral hem        | 56.7% (41.4 to 73.0%)                   | 10.5% (-0.3 to 22.0%)                     | -11.2% (-19.8 to -2.0%)                            |
| 20 Age-related hearing loss | 20 Self-harm other means    | 71.1% (44.8 to 95.2%)                   | 20.7% (2.1 to 37.7%)                      | 23.1% (3.2 to 40.4%)                               |
| 21 Intracerebral hem        | 21 Breast cancer            | 25.7% (8.8 to 43.7%)                    | -11.3% (-23.3 to 1.4%)                    | -30.2% (-39.5 to -20.3%)                           |
| 22 Lower respiratory infect | 22 Self-harm by firearm     | 29.2% (4.9 to 49.4%)                    | -8.9% (-26.0 to 5.4%)                     | -11.9% (-29.2 to 2.2%)                             |
| 23 Other cardiovascular     | 23 Other cardiovascular     | 46.8% (34.4 to 60.0%)                   | 3.5% (-5.2 to 12.9%)                      | -16.4% (-23.5 to -8.9%)                            |
| 24 Acne vulgaris            | 24 Osteoarthritis           | 92.3% (83.8 to 101.9%)                  | 35.6% (29.6 to 42.4%)                     | 7.1% (1.8 to 12.7%)                                |
| 25 Self-harm other means    | 25 Endo/metab/blood/immune  | 144.1% (80.0 to 178.0%)                 | 72.2% (27.0 to 96.0%)                     | 45.7% (11.2 to 64.2%)                              |
| 31 Osteoarthritis           | 26 Lower respiratory infect |                                         |                                           |                                                    |
| 38 Endo/metab/blood/immune  | 27 Acne vulgaris            |                                         |                                           |                                                    |

Legend:

- Communicable, maternal, neonatal and nutritional
- Non-communicable
- Injuries

Top 25 most-detailed causes of DALYs for 1990 and 2016 for both sexes in Pennsylvania

| Leading causes 1990         | Leading causes 2016         | Mean % change number of DALYs 1990-2016 | Mean % change all-age DALY rate 1990-2016 | Mean % change age-standardized DALY rate 1990-2016 |
|-----------------------------|-----------------------------|-----------------------------------------|-------------------------------------------|----------------------------------------------------|
| 1 Ischemic heart disease    | 1 Ischemic heart disease    | -37.3% (-42.0 to -32.3%)                | -41.5% (-45.8 to -36.8%)                  | -51.5% (-55.2 to -47.5%)                           |
| 2 Lung cancer               | 2 Lung cancer               | -5.4% (-13.8 to 4.7%)                   | -11.7% (-19.6 to -2.3%)                   | -28.7% (-35.0 to -21.0%)                           |
| 3 Diabetes                  | 3 COPD                      | 38.5% (28.9 to 48.7%)                   | 29.2% (20.2 to 38.8%)                     | 8.5% (1.2 to 16.6%)                                |
| 4 Low back pain             | 4 Diabetes                  | 6.1% (0.1 to 11.6%)                     | -1.0% (-6.6 to 4.1%)                      | -15.5% (-20.1 to -11.1%)                           |
| 5 COPD                      | 5 Low back pain             | 16.2% (3.2 to 29.6%)                    | 8.4% (-3.7 to 20.9%)                      | 3.4% (-8.6 to 15.9%)                               |
| 6 Opioid use disorders      | 6 Opioid use disorders      | 52.3% (17.7 to 75.3%)                   | 42.1% (9.8 to 63.6%)                      | 58.0% (21.7 to 82.1%)                              |
| 7 Other musculoskeletal     | 7 Alzheimer disease         | 42.8% (32.0 to 54.0%)                   | 33.3% (23.2 to 43.7%)                     | 0.4% (-6.4 to 7.0%)                                |
| 8 Alzheimer disease         | 8 Other musculoskeletal     | 8.7% (-1.0 to 18.7%)                    | 1.4% (-7.6 to 10.8%)                      | 0.1% (-8.3 to 9.4%)                                |
| 9 Colorectal cancer         | 9 Neck pain                 | 29.3% (15.5 to 43.9%)                   | 20.7% (7.8 to 34.3%)                      | 7.5% (-4.5 to 20.0%)                               |
| 10 Major depression         | 10 Falls                    | 72.6% (52.8 to 84.1%)                   | 61.1% (42.5 to 71.8%)                     | 30.5% (18.0 to 38.1%)                              |
| 11 Motor vehicle road inj   | 11 Migraine                 | 8.4% (4.5 to 12.6%)                     | 1.1% (-2.5 to 5.0%)                       | 1.8% (-2.1 to 5.9%)                                |
| 12 Migraine                 | 12 Major depression         | 4.3% (-2.9 to 12.0%)                    | -2.7% (-9.4 to 4.5%)                      | -0.4% (-7.5 to 6.7%)                               |
| 13 Ischemic stroke          | 13 Ischemic stroke          | 6.6% (-2.3 to 15.6%)                    | -0.6% (-8.8 to 7.9%)                      | -19.4% (-25.9 to -12.8%)                           |
| 14 Neck pain                | 14 Colorectal cancer        | -14.0% (-22.3 to -4.5%)                 | -19.8% (-27.5 to -10.9%)                  | -31.3% (-37.8 to -23.9%)                           |
| 15 Breast cancer            | 15 Anxiety disorders        | 8.6% (2.9 to 14.8%)                     | 1.4% (-4.0 to 7.1%)                       | 1.0% (-4.2 to 6.2%)                                |
| 16 Anxiety disorders        | 16 Age-related hearing loss | 38.8% (33.4 to 45.0%)                   | 29.5% (24.5 to 35.3%)                     | 9.5% (5.6 to 14.3%)                                |
| 17 Neonatal preterm birth   | 17 Lower respiratory infect | 17.7% (4.3 to 30.6%)                    | 9.8% (-2.7 to 21.9%)                      | -10.0% (-19.6 to -0.5%)                            |
| 18 Lower respiratory infect | 18 Motor vehicle road inj   | -21.3% (-28.7 to -13.6%)                | -26.6% (-33.5 to -19.4%)                  | -26.8% (-33.8 to -19.5%)                           |
| 19 Intracerebral hem        | 19 Intracerebral hem        | 9.8% (-0.3 to 20.4%)                    | 2.4% (-7.0 to 12.3%)                      | -15.5% (-22.9 to -7.6%)                            |
| 20 Falls                    | 20 Breast cancer            | -19.5% (-29.0 to -8.3%)                 | -24.9% (-33.8 to -14.4%)                  | -37.9% (-45.1 to -29.2%)                           |
| 21 Other cardiovascular     | 21 Osteoarthritis           | 39.9% (34.1 to 46.0%)                   | 30.5% (25.1 to 36.2%)                     | 9.1% (4.2 to 14.1%)                                |
| 22 Age-related hearing loss | 22 Other cardiovascular     | -0.1% (-7.8 to 7.7%)                    | -6.8% (-14.0 to 0.5%)                     | -19.2% (-25.8 to -13.1%)                           |
| 23 HIV/AIDS other           | 23 Diabetes CKD             | 70.5% (57.8 to 84.2%)                   | 59.1% (47.2 to 71.9%)                     | 36.6% (27.2 to 46.9%)                              |
| 24 Osteoarthritis           | 24 Self-harm other means    | 20.4% (6.2 to 35.1%)                    | 12.3% (-0.9 to 26.1%)                     | 17.7% (4.1 to 32.1%)                               |
| 25 Self-harm by firearm     | 25 Pancreatic cancer        | 34.0% (21.0 to 49.1%)                   | 25.1% (12.9 to 39.1%)                     | 3.3% (-6.6 to 14.9%)                               |
| 26 Self-harm other means    | 26 Neonatal preterm birth   |                                         |                                           |                                                    |
| 28 Pancreatic cancer        | 29 Self-harm by firearm     |                                         |                                           |                                                    |
| 34 Diabetes CKD             | 66 HIV/AIDS other           |                                         |                                           |                                                    |

Legend:

- Communicable, maternal, neonatal and nutritional
- Non-communicable
- Injuries



Top 25 most-detailed causes of DALYs for 1990 and 2016 for both sexes in Rhode Island

| Leading causes 1990         | Leading causes 2016         | Mean % change number of DALYs 1990-2016 | Mean % change all-age DALY rate 1990-2016 | Mean % change age-standardized DALY rate 1990-2016 |
|-----------------------------|-----------------------------|-----------------------------------------|-------------------------------------------|----------------------------------------------------|
| 1 Ischemic heart disease    | 1 Ischemic heart disease    | -39.4% (-45.9 to -32.2%)                | -42.1% (-48.3 to -35.3%)                  | -52.6% (-57.8 to -46.6%)                           |
| 2 Lung cancer               | 2 Lung cancer               | -1.7% (-13.9 to 10.7%)                  | -6.1% (-17.8 to 5.7%)                     | -25.2% (-34.7 to -15.6%)                           |
| 3 Low back pain             | 3 COPD                      | 37.3% (24.4 to 50.3%)                   | 31.1% (18.8 to 43.6%)                     | 9.9% (-0.4 to 20.4%)                               |
| 4 Diabetes                  | 4 Diabetes                  | 31.8% (19.7 to 41.9%)                   | 25.8% (14.3 to 35.5%)                     | 7.1% (-2.4 to 15.4%)                               |
| 5 COPD                      | 5 Alzheimer disease         | 38.4% (23.0 to 55.2%)                   | 32.2% (17.5 to 48.2%)                     | 3.6% (-7.7 to 15.1%)                               |
| 6 Opioid use disorders      | 6 Opioid use disorders      | 29.5% (6.3 to 47.9%)                    | 23.7% (1.5 to 41.3%)                      | 35.9% (11.7 to 55.1%)                              |
| 7 Major depression          | 7 Low back pain             | -6.8% (-17.3 to 4.9%)                   | -11.0% (-21.0 to 0.1%)                    | -18.3% (-28.0 to -8.0%)                            |
| 8 Alzheimer disease         | 8 Major depression          | 0.7% (-5.3 to 7.2%)                     | -3.8% (-9.6 to 2.4%)                      | -2.7% (-8.1 to 3.2%)                               |
| 9 Migraine                  | 9 Falls                     | 61.1% (43.3 to 73.4%)                   | 53.8% (36.8 to 65.5%)                     | 26.6% (14.2 to 35.3%)                              |
| 10 Other musculoskeletal    | 10 Migraine                 | 4.3% (0.9 to 7.8%)                      | -0.4% (-3.6 to 2.9%)                      | -0.9% (-4.0 to 2.3%)                               |
| 11 Colorectal cancer        | 11 Other musculoskeletal    | 5.6% (-4.1 to 16.6%)                    | 0.9% (-8.4 to 11.4%)                      | -2.5% (-10.9 to 6.9%)                              |
| 12 Anxiety disorders        | 12 Anxiety disorders        | 7.7% (2.0 to 13.8%)                     | 2.9% (-2.6 to 8.6%)                       | 1.6% (-3.9 to 7.0%)                                |
| 13 Ischemic stroke          | 13 Neck pain                | 13.8% (3.9 to 23.6%)                    | 8.6% (-0.8 to 18.0%)                      | -6.1% (-14.7 to 2.1%)                              |
| 14 Neck pain                | 14 Age-related hearing loss | 33.8% (28.8 to 39.4%)                   | 27.8% (23.0 to 33.1%)                     | 9.2% (5.4 to 13.4%)                                |
| 15 Breast cancer            | 15 Ischemic stroke          | -0.3% (-10.0 to 9.4%)                   | -4.8% (-14.1 to 4.5%)                     | -21.4% (-29.1 to -13.8%)                           |
| 16 Motor vehicle road inj   | 16 Colorectal cancer        | -18.0% (-28.0 to -6.7%)                 | -21.7% (-31.2 to -10.9%)                  | -34.0% (-42.4 to -24.4%)                           |
| 17 Falls                    | 17 Self-harm other means    | 3.5% (-10.9 to 19.9%)                   | -1.1% (-14.9 to 14.5%)                    | 1.4% (-12.5 to 18.1%)                              |
| 18 Neonatal preterm birth   | 18 Alcohol use disorders    | 4.7% (-5.2 to 15.6%)                    | 0.0% (-9.5 to 10.4%)                      | -1.6% (-10.3 to 7.4%)                              |
| 19 Self-harm other means    | 19 Breast cancer            | -23.9% (-36.2 to -9.3%)                 | -27.3% (-39.0 to -13.3%)                  | -41.2% (-51.0 to -29.5%)                           |
| 20 Age-related hearing loss | 20 Lower respiratory infect | 5.7% (-8.5 to 22.7%)                    | 1.0% (-12.7 to 17.2%)                     | -18.1% (-28.7 to -6.1%)                            |
| 21 Alcohol use disorders    | 21 Intracerebral hem        | 4.2% (-8.0 to 17.9%)                    | -0.5% (-12.2 to 12.6%)                    | -18.2% (-28.0 to -7.4%)                            |
| 22 Lower respiratory infect | 22 Osteoarthritis           | 38.9% (33.3 to 44.7%)                   | 32.7% (27.3 to 38.2%)                     | 8.9% (4.2 to 13.8%)                                |
| 23 Acne vulgaris            | 23 Other drug use disorders | 62.2% (23.7 to 133.9%)                  | 54.9% (18.1 to 123.4%)                    | 62.5% (24.4 to 133.6%)                             |
| 24 Intracerebral hem        | 24 Acne vulgaris            | -3.8% (-7.4 to -0.3%)                   | -8.2% (-11.6 to -4.8%)                    | -1.5% (-5.3 to 2.4%)                               |
| 25 Other cardiovascular     | 25 Motor vehicle road inj   | -31.8% (-40.0 to -21.2%)                | -34.9% (-42.7 to -24.8%)                  | -35.0% (-43.0 to -24.8%)                           |
| 28 Osteoarthritis           | 26 Neonatal preterm birth   |                                         |                                           |                                                    |
| 32 Other drug use disorders | 29 Other cardiovascular     |                                         |                                           |                                                    |

Legend:

- Communicable, maternal, neonatal and nutritional
- Non-communicable
- Injuries

Top 25 most-detailed causes of DALYs for 1990 and 2016 for both sexes in South Carolina

| Leading causes 1990         | Leading causes 2016         | Mean % change number of DALYs 1990-2016 | Mean % change all-age DALY rate 1990-2016 | Mean % change age-standardized DALY rate 1990-2016 |
|-----------------------------|-----------------------------|-----------------------------------------|-------------------------------------------|----------------------------------------------------|
| 1 Ischemic heart disease    | 1 Ischemic heart disease    | 0.3% (-10.7 to 12.5%)                   | <b>-28.6% (-36.4 to -20.0%)</b>           | <b>-48.6% (-54.3 to -42.3%)</b>                    |
| 2 Lung cancer               | 2 Lung cancer               | <b>55.5% (36.1 to 77.5%)</b>            | 10.6% (-3.1 to 26.3%)                     | <b>-24.1% (-33.6 to -13.5%)</b>                    |
| 3 Motor vehicle road inj    | 3 COPD                      | <b>142.1% (120.7 to 167.1%)</b>         | <b>72.2% (57.0 to 90.1%)</b>              | <b>20.1% (9.8 to 32.2%)</b>                        |
| 4 Low back pain             | 4 Diabetes                  | <b>109.5% (92.7 to 125.6%)</b>          | <b>49.1% (37.1 to 60.5%)</b>              | <b>10.9% (1.7 to 19.5%)</b>                        |
| 5 Diabetes                  | 5 Low back pain             | <b>51.0% (33.3 to 69.7%)</b>            | 7.4% (-5.2 to 20.8%)                      | -6.2% (-17.3 to 6.1%)                              |
| 6 COPD                      | 6 Opioid use disorders      | <b>72.7% (40.3 to 98.4%)</b>            | 22.9% (-0.2 to 41.2%)                     | <b>35.6% (10.6 to 56.1%)</b>                       |
| 7 Ischemic stroke           | 7 Ischemic stroke           | <b>43.7% (30.2 to 57.7%)</b>            | 2.2% (-7.3 to 12.2%)                      | <b>-29.6% (-36.2 to -22.8%)</b>                    |
| 8 Major depression          | 8 Motor vehicle road inj    | -6.3% (-16.6 to 6.0%)                   | <b>-33.3% (-40.7 to -24.6%)</b>           | <b>-29.9% (-37.8 to -21.0%)</b>                    |
| 9 Neonatal preterm birth    | 9 Alzheimer disease         | <b>123.5% (102.4 to 148.7%)</b>         | <b>59.0% (44.0 to 76.9%)</b>              | 2.4% (-7.2 to 12.9%)                               |
| 10 Other musculoskeletal    | 10 Other musculoskeletal    | <b>45.0% (30.3 to 59.9%)</b>            | 3.2% (-7.3 to 13.8%)                      | -4.6% (-13.9 to 4.8%)                              |
| 11 Opioid use disorders     | 11 Major depression         | <b>35.3% (26.1 to 45.5%)</b>            | -3.7% (-10.3 to 3.5%)                     | -1.2% (-7.6 to 5.9%)                               |
| 12 Migraine                 | 12 Neck pain                | <b>76.0% (55.8 to 98.3%)</b>            | <b>25.2% (10.9 to 41.1%)</b>              | 1.7% (-9.5 to 14.4%)                               |
| 13 Intracerebral hem        | 13 Migraine                 | <b>42.8% (37.5 to 48.2%)</b>            | 1.6% (-2.2 to 5.5%)                       | 2.7% (-1.2 to 6.5%)                                |
| 14 Anxiety disorders        | 14 Intracerebral hem        | <b>44.4% (26.9 to 63.1%)</b>            | 2.7% (-9.7 to 16.0%)                      | <b>-22.2% (-31.6 to -12.0%)</b>                    |
| 15 Neck pain                | 15 Falls                    | <b>125.3% (100.0 to 142.7%)</b>         | <b>60.3% (42.3 to 72.7%)</b>              | <b>21.7% (9.1 to 30.0%)</b>                        |
| 16 Alzheimer disease        | 16 Lower respiratory infect | <b>76.1% (52.6 to 102.6%)</b>           | <b>25.3% (8.6 to 44.2%)</b>               | -7.6% (-19.6 to 6.1%)                              |
| 17 Colorectal cancer        | 17 Anxiety disorders        | <b>43.1% (35.7 to 51.5%)</b>            | 1.8% (-3.4 to 7.8%)                       | 1.5% (-3.6 to 7.3%)                                |
| 18 Alcohol use disorders    | 18 Colorectal cancer        | <b>63.6% (43.8 to 86.3%)</b>            | <b>16.4% (2.3 to 32.6%)</b>               | <b>-15.9% (-26.0 to -3.9%)</b>                     |
| 19 Lower respiratory infect | 19 Age-related hearing loss | <b>114.5% (105.2 to 124.7%)</b>         | <b>52.7% (46.0 to 59.8%)</b>              | <b>11.3% (6.4 to 16.4%)</b>                        |
| 20 Breast cancer            | 20 Diabetes CKD             | <b>182.8% (156.0 to 212.1%)</b>         | <b>101.2% (82.1 to 122.1%)</b>            | <b>48.1% (34.6 to 63.3%)</b>                       |
| 21 Self-harm by firearm     | 21 Breast cancer            | <b>40.2% (15.8 to 68.4%)</b>            | -0.2% (-17.6 to 19.8%)                    | <b>-25.3% (-38.4 to -10.6%)</b>                    |
| 22 HIV/AIDS other           | 22 Other cardiovascular     | <b>55.5% (40.5 to 71.6%)</b>            | 10.6% (0.0 to 22.1%)                      | <b>-14.2% (-22.6 to -5.1%)</b>                     |
| 23 Falls                    | 23 Self-harm by firearm     | 26.3% (-0.3 to 51.0%)                   | <b>-10.1% (-29.1 to 7.5%)</b>             | <b>-8.6% (-27.8 to 9.3%)</b>                       |
| 24 Violence firearm         | 24 Alcohol use disorders    | <b>11.1% (1.8 to 20.7%)</b>             | <b>-21.0% (-27.6 to -14.1%)</b>           | <b>-21.8% (-28.1 to -15.2%)</b>                    |
| 25 Acne vulgaris            | 25 Neonatal preterm birth   | <b>-33.6% (-43.2 to -23.4%)</b>         | <b>-52.7% (-59.6 to -45.5%)</b>           | <b>-39.8% (-48.5 to -30.9%)</b>                    |
| 26 Other cardiovascular     | 29 Acne vulgaris            |                                         |                                           |                                                    |
| 27 Age-related hearing loss | 31 Violence firearm         |                                         |                                           |                                                    |
| 33 Diabetes CKD             | 45 HIV/AIDS other           |                                         |                                           |                                                    |

Legend:

- Communicable, maternal, neonatal and nutritional
- Non-communicable
- Injuries

**Top 25 most-detailed causes of DALYs for 1990 and 2016 for both sexes in South Dakota**

| Leading causes 1990         | Leading causes 2016         | Mean % change number of DALYs 1990-2016 | Mean % change all-age DALY rate 1990-2016 | Mean % change age-standardized DALY rate 1990-2016 |
|-----------------------------|-----------------------------|-----------------------------------------|-------------------------------------------|----------------------------------------------------|
| 1 Ischemic heart disease    | 1 Ischemic heart disease    | -25.2% (-33.1 to -16.7%)                | -39.7% (-46.0 to -32.8%)                  | -47.4% (-53.2 to -40.9%)                           |
| 2 Lung cancer               | 2 Lung cancer               | 31.2% (15.0 to 49.6%)                   | 5.8% (-7.2 to 20.7%)                      | -14.5% (-25.1 to -2.5%)                            |
| 3 Low back pain             | 3 COPD                      | 66.9% (53.0 to 83.4%)                   | 34.7% (23.4 to 48.0%)                     | 14.6% (5.2 to 25.9%)                               |
| 4 Motor vehicle road inj    | 4 Low back pain             | 28.4% (15.6 to 41.9%)                   | 3.6% (-6.7 to 14.5%)                      | -3.5% (-13.9 to 7.1%)                              |
| 5 COPD                      | 5 Diabetes                  | 76.5% (63.0 to 90.7%)                   | 42.4% (31.5 to 53.9%)                     | 22.8% (13.2 to 32.4%)                              |
| 6 Other musculoskeletal     | 6 Other musculoskeletal     | 31.1% (21.1 to 42.6%)                   | 5.8% (-2.3 to 15.1%)                      | 2.2% (-5.8 to 10.6%)                               |
| 7 Diabetes                  | 7 Alzheimer disease         | 43.1% (28.5 to 58.2%)                   | 15.4% (3.7 to 27.6%)                      | 0.0% (-9.8 to 10.5%)                               |
| 8 Alzheimer disease         | 8 Motor vehicle road inj    | -2.7% (-13.8 to 8.7%)                   | -21.5% (-30.4 to -12.3%)                  | -22.0% (-30.8 to -12.8%)                           |
| 9 Ischemic stroke           | 9 Falls                     | 101.6% (80.4 to 116.4%)                 | 62.7% (45.5 to 74.6%)                     | 38.5% (25.5 to 48.2%)                              |
| 10 Major depression         | 10 Ischemic stroke          | 21.1% (9.4 to 32.8%)                    | -2.3% (-11.8 to 7.1%)                     | -15.0% (-23.3 to -7.1%)                            |
| 11 Migraine                 | 11 Major depression         | 27.7% (19.0 to 37.1%)                   | 3.0% (-4.0 to 10.6%)                      | 3.3% (-3.5 to 10.9%)                               |
| 12 Anxiety disorders        | 12 Anxiety disorders        | 27.0% (20.4 to 33.6%)                   | 2.4% (-2.9 to 7.8%)                       | 1.0% (-4.1 to 6.3%)                                |
| 13 Colorectal cancer        | 13 Migraine                 | 19.7% (15.2 to 24.2%)                   | -3.4% (-7.1 to 0.2%)                      | -4.8% (-8.2 to -1.4%)                              |
| 14 Falls                    | 14 Age-related hearing loss | 51.9% (46.1 to 58.5%)                   | 22.6% (17.9 to 27.9%)                     | 8.0% (3.9 to 12.7%)                                |
| 15 Lower respiratory infect | 15 Colorectal cancer        | 14.0% (-0.9 to 29.0%)                   | -8.0% (-20.1 to 4.1%)                     | -20.4% (-31.1 to -9.5%)                            |
| 16 Neck pain                | 16 Neck pain                | 34.6% (22.8 to 47.5%)                   | 8.6% (-0.9 to 19.0%)                      | -6.1% (-14.9 to 3.4%)                              |
| 17 Neonatal preterm birth   | 17 Opioid use disorders     | 207.9% (166.3 to 254.6%)                | 148.4% (114.8 to 186.1%)                  | 163.9% (126.6 to 204.1%)                           |
| 18 Age-related hearing loss | 18 Lower respiratory infect | 12.5% (-1.1 to 27.9%)                   | -9.2% (-20.2 to 3.2%)                     | -20.1% (-29.3 to -9.2%)                            |
| 19 Breast cancer            | 19 Alcohol use disorders    | 40.0% (26.4 to 54.7%)                   | 13.0% (2.0 to 24.8%)                      | 8.9% (-1.5 to 20.1%)                               |
| 20 Intracerebral hem        | 20 Intracerebral hem        | 34.4% (18.7 to 51.6%)                   | 8.4% (-4.3 to 22.3%)                      | -6.6% (-17.9 to 5.6%)                              |
| 21 Self-harm by firearm     | 21 Breast cancer            | 13.6% (-6.4 to 34.7%)                   | -8.3% (-24.5 to 8.6%)                     | -22.7% (-36.5 to -8.3%)                            |
| 22 Alcohol use disorders    | 22 Self-harm other means    | 78.9% (46.5 to 111.1%)                  | 44.3% (18.2 to 70.3%)                     | 47.5% (20.5 to 75.0%)                              |
| 23 Acne vulgaris            | 23 Self-harm by firearm     | 21.4% (0.0 to 47.2%)                    | -2.1% (-19.3 to 18.7%)                    | -3.0% (-20.7 to 18.3%)                             |
| 24 Other cardiovascular     | 24 Neonatal preterm birth   | -7.4% (-20.9 to 7.6%)                   | -25.3% (-36.2 to -13.2%)                  | -18.6% (-30.5 to -5.5%)                            |
| 25 SIDS                     | 25 Acne vulgaris            | 10.9% (6.7 to 15.4%)                    | -10.6% (-14.0 to -6.9%)                   | -2.4% (-6.2 to 1.6%)                               |
| 27 Self-harm other means    | 27 Other cardiovascular     |                                         |                                           |                                                    |
| 40 Opioid use disorders     | 87 SIDS                     |                                         |                                           |                                                    |

**Legend:**

- Communicable, maternal, neonatal and nutritional
- Non-communicable
- Injuries

**Top 25 most-detailed causes of DALYs for 1990 and 2016 for both sexes in Tennessee**

| Leading causes 1990           | Leading causes 2016           | Mean % change number of DALYs 1990-2016 | Mean % change all-age DALY rate 1990-2016 | Mean % change age-standardized DALY rate 1990-2016 |
|-------------------------------|-------------------------------|-----------------------------------------|-------------------------------------------|----------------------------------------------------|
| 1 Ischemic heart disease      | 1 Ischemic heart disease      | 0.8% (-7.5 to 8.9%)                     | -25.4% (-31.6 to -19.5%)                  | -39.4% (-44.2 to -34.4%)                           |
| 2 Lung cancer                 | 2 Lung cancer                 | 42.7% (28.9 to 56.1%)                   | 5.6% (-4.6 to 15.5%)                      | -19.6% (-27.5 to -12.1%)                           |
| 3 Motor vehicle road inj      | 3 COPD                        | 111.2% (95.5 to 127.1%)                 | 56.2% (44.6 to 68.0%)                     | 23.3% (14.4 to 32.5%)                              |
| 4 Low back pain               | 4 Diabetes                    | 104.8% (91.1 to 118.1%)                 | 51.5% (41.4 to 61.3%)                     | 24.6% (16.0 to 32.7%)                              |
| 5 COPD                        | 5 Opioid use disorders        | 80.5% (40.2 to 107.7%)                  | 33.5% (3.7 to 53.7%)                      | 46.2% (14.2 to 67.6%)                              |
| 6 Diabetes                    | 6 Low back pain               | 33.1% (17.7 to 48.3%)                   | -1.5% (-12.9 to 9.7%)                     | -9.3% (-19.9 to 1.3%)                              |
| 7 Ischemic stroke             | 7 Alzheimer disease           | 80.4% (62.7 to 99.3%)                   | 33.4% (20.4 to 47.4%)                     | 6.4% (-3.8 to 17.1%)                               |
| 8 Opioid use disorders        | 8 Motor vehicle road inj      | -8.1% (-16.7 to 0.6%)                   | -32.0% (-38.4 to -25.6%)                  | -30.9% (-37.4 to -24.3%)                           |
| 9 Major depression            | 9 Ischemic stroke             | 30.8% (19.8 to 41.1%)                   | -3.3% (-11.4 to 4.4%)                     | -21.6% (-27.9 to -15.7%)                           |
| 10 Other musculoskeletal      | 10 Major depression           | 36.7% (28.2 to 44.7%)                   | 1.1% (-5.2 to 7.0%)                       | 3.6% (-2.8 to 9.4%)                                |
| 11 Migraine                   | 11 Other musculoskeletal      | 36.1% (24.0 to 50.8%)                   | 0.7% (-8.3 to 11.6%)                      | -3.8% (-12.0 to 5.8%)                              |
| 12 Alzheimer disease          | 12 Migraine                   | 28.8% (24.3 to 33.1%)                   | -4.8% (-8.1 to -1.6%)                     | -3.2% (-6.6 to 0.2%)                               |
| 13 Anxiety disorders          | 13 Neck pain                  | 61.8% (42.8 to 82.5%)                   | 19.7% (5.6 to 35.0%)                      | 3.3% (-8.9 to 16.5%)                               |
| 14 Neonatal preterm birth     | 14 Falls                      | 116.6% (90.0 to 131.0%)                 | 60.2% (40.6 to 70.9%)                     | 31.7% (17.8 to 39.9%)                              |
| 15 Colorectal cancer          | 15 Lower respiratory infect   | 70.3% (52.4 to 89.3%)                   | 25.9% (12.7 to 40.0%)                     | 4.5% (-6.0 to 15.8%)                               |
| 16 Neck pain                  | 16 Colorectal cancer          | 45.6% (31.4 to 59.7%)                   | 7.7% (-2.8 to 18.1%)                      | -12.6% (-21.2 to -4.4%)                            |
| 17 Intracerebral hem          | 17 Intracerebral hem          | 55.4% (40.2 to 70.4%)                   | 14.9% (3.7 to 26.1%)                      | -4.5% (-13.7 to 4.8%)                              |
| 18 Lower respiratory infect   | 18 Anxiety disorders          | 36.6% (29.2 to 44.0%)                   | 1.0% (-4.5 to 6.5%)                       | 1.3% (-4.1 to 6.6%)                                |
| 19 Breast cancer              | 19 Age-related hearing loss   | 80.0% (72.9 to 88.2%)                   | 33.2% (27.9 to 39.2%)                     | 10.1% (5.8 to 15.2%)                               |
| 20 Self-harm by firearm       | 20 Self-harm by firearm       | 30.2% (7.9 to 50.5%)                    | -3.7% (-20.2 to 11.3%)                    | -3.1% (-19.1 to 11.9%)                             |
| 21 Falls                      | 21 Breast cancer              | 23.7% (7.7 to 41.7%)                    | -8.5% (-20.4 to 4.8%)                     | -26.0% (-35.7 to -14.9%)                           |
| 22 Age-related hearing loss   | 22 Diabetes CKD               | 158.7% (139.1 to 180.1%)                | 91.3% (76.8 to 107.2%)                    | 58.1% (46.1 to 71.2%)                              |
| 23 Violence firearm           | 23 Other cardiovascular       | 53.9% (40.9 to 67.4%)                   | 13.8% (4.2 to 23.8%)                      | -2.4% (-10.8 to 6.1%)                              |
| 24 Acne vulgaris              | 24 Hypertensive heart disease | 103.0% (54.2 to 135.2%)                 | 50.2% (14.0 to 74.0%)                     | 25.8% (-7.7 to 47.6%)                              |
| 25 Other cardiovascular       | 25 Neonatal preterm birth     | -19.0% (-29.2 to -8.1%)                 | -40.1% (-47.7 to -32.0%)                  | -30.6% (-39.2 to -21.5%)                           |
| 33 Hypertensive heart disease | 32 Violence firearm           |                                         |                                           |                                                    |
| 37 Diabetes CKD               | 33 Acne vulgaris              |                                         |                                           |                                                    |

**Legend:**

- Communicable, maternal, neonatal and nutritional
- Non-communicable
- Injuries

Top 25 most-detailed causes of DALYs for 1990 and 2016 for both sexes in Texas

| Leading causes 1990         | Leading causes 2016         | Mean % change number of DALYs 1990-2016 | Mean % change all-age DALY rate 1990-2016 | Mean % change age-standardized DALY rate 1990-2016 |
|-----------------------------|-----------------------------|-----------------------------------------|-------------------------------------------|----------------------------------------------------|
| 1 Ischemic heart disease    | 1 Ischemic heart disease    | 8.0% (-1.7 to 17.6%)                    | -33.5% (-39.5 to -27.6%)                  | -46.8% (-51.5 to -42.1%)                           |
| 2 Lung cancer               | 2 Diabetes                  | 112.2% (97.0 to 126.8%)                 | 30.7% (21.3 to 39.6%)                     | 6.7% (-0.9 to 14.1%)                               |
| 3 Low back pain             | 3 COPD                      | 110.3% (94.6 to 127.7%)                 | 29.5% (19.8 to 40.2%)                     | 4.1% (-3.5 to 12.6%)                               |
| 4 Motor vehicle road inj    | 4 Low back pain             | 56.5% (37.0 to 76.8%)                   | -3.7% (-15.6 to 8.9%)                     | -12.7% (-23.6 to -1.3%)                            |
| 5 Diabetes                  | 5 Lung cancer               | 24.5% (12.1 to 38.9%)                   | -23.3% (-31.0 to -14.5%)                  | -40.5% (-46.4 to -33.7%)                           |
| 6 COPD                      | 6 Neck pain                 | 106.5% (85.0 to 130.1%)                 | 27.1% (13.9 to 41.6%)                     | 9.9% (-1.7 to 22.9%)                               |
| 7 Other musculoskeletal     | 7 Alzheimer disease         | 130.9% (112.3 to 149.5%)                | 42.2% (30.7 to 53.6%)                     | 16.0% (6.8 to 25.5%)                               |
| 8 Migraine                  | 8 Other musculoskeletal     | 66.2% (50.1 to 83.8%)                   | 2.3% (-7.6 to 13.2%)                      | -4.6% (-13.5 to 4.7%)                              |
| 9 HIV/AIDS other            | 9 Motor vehicle road inj    | 11.7% (-0.6 to 25.1%)                   | -31.2% (-38.8 to -23.0%)                  | -30.2% (-37.7 to -21.9%)                           |
| 10 Major depression         | 10 Migraine                 | 61.0% (55.4 to 66.7%)                   | -0.9% (-4.3 to 2.6%)                      | -2.4% (-5.9 to 1.0%)                               |
| 11 Anxiety disorders        | 11 Opioid use disorders     | 176.1% (121.3 to 215.5%)                | 70.0% (36.2 to 94.2%)                     | 82.2% (46.2 to 107.9%)                             |
| 12 Neck pain                | 12 Major depression         | 66.2% (52.3 to 80.2%)                   | 2.3% (-6.2 to 10.9%)                      | 3.1% (-5.3 to 11.2%)                               |
| 13 Ischemic stroke          | 13 Anxiety disorders        | 67.6% (58.5 to 76.8%)                   | 3.2% (-2.4 to 8.8%)                       | 1.4% (-4.0 to 6.8%)                                |
| 14 Neonatal preterm birth   | 14 Ischemic stroke          | 60.8% (47.5 to 75.1%)                   | -1.0% (-9.2 to 7.8%)                      | -18.9% (-25.6 to -11.8%)                           |
| 15 Alzheimer disease        | 15 Falls                    | 123.1% (101.2 to 136.9%)                | 37.3% (23.9 to 45.9%)                     | 18.8% (7.5 to 25.5%)                               |
| 16 Self-harm by firearm     | 16 Lower respiratory infect | 78.0% (59.1 to 100.8%)                  | 9.6% (-2.1 to 23.6%)                      | -6.0% (-15.9 to 5.8%)                              |
| 17 Violence firearm         | 17 Age-related hearing loss | 110.3% (102.6 to 119.5%)                | 29.4% (24.7 to 35.1%)                     | 8.7% (4.6 to 13.8%)                                |
| 18 Colorectal cancer        | 18 Colorectal cancer        | 58.8% (42.7 to 75.8%)                   | -2.2% (-12.2 to 8.2%)                     | -22.0% (-30.1 to -13.7%)                           |
| 19 Intracerebral hem        | 19 Intracerebral hem        | 70.0% (52.9 to 88.2%)                   | 4.6% (-5.9 to 15.9%)                      | -13.1% (-21.6 to -3.9%)                            |
| 20 Lower respiratory infect | 20 Acne vulgaris            | 49.0% (43.7 to 54.8%)                   | -8.3% (-11.5 to -4.7%)                    | -1.3% (-4.8 to 2.5%)                               |
| 21 Acne vulgaris            | 21 Diabetes CKD             | 234.7% (206.2 to 263.4%)                | 106.1% (88.5 to 123.7%)                   | 69.0% (55.9 to 83.0%)                              |
| 22 Falls                    | 22 Breast cancer            | 39.9% (21.2 to 62.4%)                   | -13.9% (-25.4 to 0.0%)                    | -30.7% (-40.2 to -19.6%)                           |
| 23 Breast cancer            | 23 Neonatal preterm birth   | 0.1% (-13.7 to 15.7%)                   | -38.4% (-46.9 to -28.8%)                  | -27.2% (-37.1 to -16.3%)                           |
| 24 Opioid use disorders     | 24 Self-harm by firearm     | 14.1% (-6.0 to 33.3%)                   | -29.8% (-42.1 to -18.0%)                  | -30.6% (-42.2 to -19.1%)                           |
| 25 Age-related hearing loss | 25 Dermatitis               | 58.2% (52.9 to 63.6%)                   | -2.6% (-5.9 to 0.7%)                      | 1.3% (-1.6 to 4.6%)                                |
| 26 Dermatitis               | 33 Violence firearm         |                                         |                                           |                                                    |
| 42 Diabetes CKD             | 46 HIV/AIDS other           |                                         |                                           |                                                    |

Legend:

- Communicable, maternal, neonatal and nutritional
- Non-communicable
- Injuries

Top 25 most-detailed causes of DALYs for 1990 and 2016 for both sexes in Utah

| Leading causes 1990         | Leading causes 2016         | Mean % change number of DALYs 1990-2016 | Mean % change all-age DALY rate 1990-2016 | Mean % change age-standardized DALY rate 1990-2016 |
|-----------------------------|-----------------------------|-----------------------------------------|-------------------------------------------|----------------------------------------------------|
| 1 Ischemic heart disease    | 1 Ischemic heart disease    | 13.8% (4.8 to 23.7%)                    | -34.6% (-39.8 to -28.9%)                  | -48.7% (-52.8 to -44.1%)                           |
| 2 Low back pain             | 2 Low back pain             | 87.0% (66.2 to 108.9%)                  | 7.4% (-4.5 to 20.0%)                      | -5.6% (-16.1 to 5.7%)                              |
| 3 Major depression          | 3 Major depression          | 98.2% (85.0 to 112.4%)                  | 13.8% (6.2 to 22.0%)                      | 10.1% (2.8 to 17.9%)                               |
| 4 Motor vehicle road inj    | 4 Diabetes                  | 137.6% (121.9 to 154.1%)                | 36.5% (27.4 to 45.9%)                     | 10.0% (2.7 to 17.5%)                               |
| 5 Other musculoskeletal     | 5 Opioid use disorders      | 133.5% (98.1 to 164.1%)                 | 34.1% (13.8 to 51.7%)                     | 31.4% (11.6 to 49.1%)                              |
| 6 Diabetes                  | 6 Other musculoskeletal     | 85.1% (69.8 to 101.2%)                  | 6.3% (-2.5 to 15.6%)                      | -5.2% (-13.3 to 2.6%)                              |
| 7 Migraine                  | 7 COPD                      | 125.6% (106.7 to 146.4%)                | 29.5% (18.7 to 41.5%)                     | 3.5% (-5.1 to 13.0%)                               |
| 8 Opioid use disorders      | 8 Migraine                  | 79.4% (73.4 to 85.8%)                   | 3.0% (-0.4 to 6.7%)                       | -1.7% (-4.9 to 1.7%)                               |
| 9 Anxiety disorders         | 9 Self-harm other means     | 183.9% (144.6 to 226.6%)                | 63.1% (40.5 to 87.6%)                     | 59.1% (37.8 to 82.7%)                              |
| 10 COPD                     | 10 Anxiety disorders        | 83.7% (74.1 to 94.0%)                   | 5.5% (0.0 to 11.4%)                       | 1.3% (-3.9 to 7.0%)                                |
| 11 Lung cancer              | 11 Neck pain                | 116.1% (94.1 to 140.7%)                 | 24.1% (11.5 to 38.2%)                     | 4.6% (-6.3 to 16.7%)                               |
| 12 Neck pain                | 12 Falls                    | 153.9% (132.9 to 169.5%)                | 45.8% (33.7 to 54.8%)                     | 27.0% (16.4 to 34.4%)                              |
| 13 Ischemic stroke          | 13 Alzheimer disease        | 111.8% (90.8 to 133.5%)                 | 21.6% (9.6 to 34.1%)                      | -3.9% (-13.0 to 6.0%)                              |
| 14 Acne vulgaris            | 14 Ischemic stroke          | 93.0% (76.9 to 110.0%)                  | 10.9% (1.6 to 20.6%)                      | -11.0% (-18.4 to -3.3%)                            |
| 15 Self-harm by firearm     | 15 Self-harm by firearm     | 90.4% (44.8 to 119.8%)                  | 9.3% (-16.9 to 26.2%)                     | 5.6% (-19.6 to 21.6%)                              |
| 16 Alzheimer disease        | 16 Motor vehicle road inj   | 5.4% (-5.8 to 19.3%)                    | -39.5% (-45.9 to -31.5%)                  | -39.2% (-45.4 to -31.3%)                           |
| 17 Neonatal preterm birth   | 17 Lung cancer              | 76.6% (58.7 to 95.3%)                   | 1.4% (-8.9 to 12.2%)                      | -21.5% (-29.5 to -13.1%)                           |
| 18 Self-harm other means    | 18 Age-related hearing loss | 132.0% (123.1 to 141.8%)                | 33.2% (28.1 to 38.9%)                     | 9.9% (5.4 to 15.0%)                                |
| 19 Falls                    | 19 Acne vulgaris            | 57.0% (51.3 to 62.6%)                   | -9.8% (-13.1 to -6.6%)                    | -2.1% (-5.5 to 1.3%)                               |
| 20 Lower respiratory infect | 20 Lower respiratory infect | 80.4% (60.5 to 102.4%)                  | 3.6% (-7.8 to 16.2%)                      | -10.6% (-20.4 to 0.4%)                             |
| 21 Age-related hearing loss | 21 Alcohol use disorders    | 110.2% (89.0 to 131.9%)                 | 20.7% (8.5 to 33.2%)                      | 12.4% (1.7 to 22.8%)                               |
| 22 Colorectal cancer        | 22 Colorectal cancer        | 84.1% (66.3 to 104.0%)                  | 5.7% (-4.5 to 17.2%)                      | -16.3% (-24.4 to -7.4%)                            |
| 23 SIDS                     | 23 Neonatal preterm birth   | 37.6% (18.2 to 60.6%)                   | -21.0% (-32.1 to -7.8%)                   | -7.3% (-20.2 to 8.1%)                              |
| 24 Alcohol use disorders    | 24 Intracerebral hem        | 105.9% (83.9 to 128.9%)                 | 18.3% (5.6 to 31.5%)                      | -3.3% (-13.5 to 7.5%)                              |
| 25 Breast cancer            | 25 Breast cancer            | 77.2% (54.4 to 103.8%)                  | 1.8% (-11.3 to 17.0%)                     | -19.9% (-30.3 to -8.0%)                            |
| 28 Intracerebral hem        | 89 SIDS                     |                                         |                                           |                                                    |

Legend:

- Communicable, maternal, neonatal and nutritional
- Non-communicable
- Injuries

Top 25 most-detailed causes of DALYs for 1990 and 2016 for both sexes in Vermont

| Leading causes 1990         | Leading causes 2016         | Mean % change number of DALYs 1990-2016 | Mean % change all-age DALY rate 1990-2016 | Mean % change age-standardized DALY rate 1990-2016 |
|-----------------------------|-----------------------------|-----------------------------------------|-------------------------------------------|----------------------------------------------------|
| 1 Ischemic heart disease    | 1 Ischemic heart disease    | -28.1% (-33.9 to -21.8%)                | -35.1% (-40.4 to -29.4%)                  | -57.5% (-61.1 to -53.6%)                           |
| 2 Lung cancer               | 2 Lung cancer               | 29.9% (16.5 to 44.8%)                   | 17.2% (5.2 to 30.7%)                      | -26.3% (-33.8 to -18.0%)                           |
| 3 Low back pain             | 3 COPD                      | 63.2% (50.4 to 77.1%)                   | 47.3% (35.7 to 59.9%)                     | -4.4% (-11.9 to 3.7%)                              |
| 4 COPD                      | 4 Diabetes                  | 60.3% (48.4 to 71.4%)                   | 44.7% (34.0 to 54.7%)                     | 1.1% (-6.2 to 8.1%)                                |
| 5 Opioid use disorders      | 5 Low back pain             | 5.8% (-6.3 to 17.3%)                    | -4.5% (-15.4 to 5.8%)                     | -18.5% (-27.9 to -9.3%)                            |
| 6 Major depression          | 6 Alzheimer disease         | 78.8% (61.9 to 97.5%)                   | 61.4% (46.1 to 78.2%)                     | 4.3% (-4.9 to 14.5%)                               |
| 7 Other musculoskeletal     | 7 Falls                     | 100.8% (75.7 to 116.5%)                 | 81.2% (58.6 to 95.4%)                     | 29.7% (15.2 to 38.6%)                              |
| 8 Diabetes                  | 8 Opioid use disorders      | 11.1% (-1.8 to 23.6%)                   | 0.2% (-11.4 to 11.6%)                     | 16.2% (2.5 to 29.4%)                               |
| 9 Motor vehicle road inj    | 9 Major depression          | 8.5% (1.1 to 16.3%)                     | -2.1% (-8.8 to 4.9%)                      | -0.6% (-6.5 to 5.9%)                               |
| 10 Migraine                 | 10 Other musculoskeletal    | 15.6% (4.4 to 28.4%)                    | 4.3% (-5.8 to 15.9%)                      | -5.1% (-13.0 to 3.5%)                              |
| 11 Alzheimer disease        | 11 Migraine                 | 6.8% (2.9 to 10.8%)                     | -3.6% (-7.1 to 0.0%)                      | -1.9% (-5.2 to 1.4%)                               |
| 12 Anxiety disorders        | 12 Ischemic stroke          | 28.4% (16.8 to 39.7%)                   | 15.9% (5.4 to 26.1%)                      | -24.2% (-31.2 to -17.8%)                           |
| 13 Ischemic stroke          | 13 Anxiety disorders        | 13.5% (7.2 to 20.2%)                    | 2.4% (-3.2 to 8.4%)                       | 1.7% (-3.5 to 7.1%)                                |
| 14 Colorectal cancer        | 14 Age-related hearing loss | 72.5% (65.4 to 79.7%)                   | 55.7% (49.3 to 62.2%)                     | 9.0% (4.8 to 13.5%)                                |
| 15 Falls                    | 15 Neck pain                | 31.7% (18.9 to 46.4%)                   | 18.9% (7.3 to 32.1%)                      | -5.9% (-14.4 to 3.0%)                              |
| 16 Neck pain                | 16 Colorectal cancer        | 10.6% (-0.1 to 22.9%)                   | -0.2% (-9.8 to 10.9%)                     | -33.2% (-39.6 to -25.9%)                           |
| 17 Breast cancer            | 17 Motor vehicle road inj   | -24.8% (-33.3 to -16.9%)                | -32.2% (-39.8 to -25.0%)                  | -31.5% (-39.3 to -24.1%)                           |
| 18 Self-harm by firearm     | 18 Breast cancer            | 1.8% (-13.0 to 18.2%)                   | -8.2% (-21.5 to 6.6%)                     | -35.4% (-44.7 to -24.8%)                           |
| 19 Neonatal preterm birth   | 19 Alcohol use disorders    | 14.4% (3.7 to 26.4%)                    | 3.2% (-6.4 to 14.1%)                      | 1.5% (-6.8 to 11.2%)                               |
| 20 Age-related hearing loss | 20 Self-harm other means    | 38.7% (17.3 to 59.3%)                   | 25.2% (5.8 to 43.8%)                      | 34.5% (13.7 to 55.2%)                              |
| 21 Alcohol use disorders    | 21 Osteoarthritis           | 73.4% (67.0 to 80.4%)                   | 56.5% (50.7 to 62.8%)                     | 5.2% (1.2 to 9.3%)                                 |
| 22 Other cardiovascular     | 22 Self-harm by firearm     | 0.4% (-13.4 to 17.7%)                   | -9.4% (-21.9 to 6.2%)                     | -7.6% (-21.5 to 9.2%)                              |
| 23 Lower respiratory infect | 23 Other cardiovascular     | 9.8% (-0.1 to 19.8%)                    | -0.9% (-9.9 to 8.1%)                      | -29.3% (-35.4 to -23.0%)                           |
| 24 Acne vulgaris            | 24 Endo/metab/blood/immune  | 97.5% (51.1 to 123.8%)                  | 78.3% (36.4 to 101.9%)                    | 41.8% (9.0 to 61.0%)                               |
| 25 Intracerebral hem        | 25 Intracerebral hem        | 19.8% (7.8 to 32.8%)                    | 8.1% (-2.7 to 19.9%)                      | -24.0% (-31.4 to -15.7%)                           |
| 26 Self-harm other means    | 26 Lower respiratory infect |                                         |                                           |                                                    |
| 28 Osteoarthritis           | 30 Acne vulgaris            |                                         |                                           |                                                    |
| 35 Endo/metab/blood/immune  | 36 Neonatal preterm birth   |                                         |                                           |                                                    |

Legend:

- Communicable, maternal, neonatal and nutritional
- Non-communicable
- Injuries

**Top 25 most-detailed causes of DALYs for 1990 and 2016 for both sexes in Virginia**

| Leading causes 1990         | Leading causes 2016         | Mean % change number of DALYs 1990-2016 | Mean % change all-age DALY rate 1990-2016 | Mean % change age-standardized DALY rate 1990-2016 |
|-----------------------------|-----------------------------|-----------------------------------------|-------------------------------------------|----------------------------------------------------|
| 1 Ischemic heart disease    | 1 Ischemic heart disease    | -14.2% (-21.4 to -6.6%)                 | -36.6% (-42.0 to -31.0%)                  | -53.3% (-57.2 to -49.1%)                           |
| 2 Lung cancer               | 2 Lung cancer               | 15.8% (5.6 to 27.6%)                    | -14.4% (-22.0 to -5.7%)                   | -38.1% (-43.5 to -31.7%)                           |
| 3 Low back pain             | 3 Diabetes                  | 105.0% (90.9 to 120.7%)                 | 51.4% (41.0 to 63.0%)                     | 16.9% (8.8 to 25.9%)                               |
| 4 Major depression          | 4 COPD                      | 74.5% (61.3 to 88.9%)                   | 28.9% (19.1 to 39.6%)                     | -5.2% (-12.2 to 2.6%)                              |
| 5 Motor vehicle road inj    | 5 Low back pain             | 30.6% (14.6 to 46.0%)                   | -3.5% (-15.3 to 7.9%)                     | -13.3% (-23.9 to -2.9%)                            |
| 6 COPD                      | 6 Alzheimer disease         | 98.6% (81.5 to 114.9%)                  | 46.7% (34.1 to 58.8%)                     | 1.6% (-6.9 to 9.9%)                                |
| 7 Diabetes                  | 7 Major depression          | 28.1% (20.3 to 36.3%)                   | -5.4% (-11.1 to 0.7%)                     | -1.7% (-7.5 to 4.0%)                               |
| 8 Migraine                  | 8 Other musculoskeletal     | 37.7% (25.5 to 51.1%)                   | 1.7% (-7.3 to 11.6%)                      | -3.9% (-11.8 to 4.6%)                              |
| 9 Other musculoskeletal     | 9 Migraine                  | 33.2% (29.0 to 37.6%)                   | -1.6% (-4.7 to 1.7%)                      | 0.3% (-2.8 to 3.5%)                                |
| 10 Ischemic stroke          | 10 Opioid use disorders     | 105.4% (72.6 to 135.5%)                 | 51.8% (27.5 to 73.9%)                     | 72.2% (44.9 to 97.3%)                              |
| 11 Neonatal preterm birth   | 11 Neck pain                | 65.6% (47.4 to 88.0%)                   | 22.3% (8.9 to 38.9%)                      | 3.5% (-8.0 to 16.9%)                               |
| 12 Anxiety disorders        | 12 Ischemic stroke          | 33.3% (22.9 to 43.6%)                   | -1.5% (-9.2 to 6.1%)                      | -28.6% (-34.1 to -23.0%)                           |
| 13 Alzheimer disease        | 13 Anxiety disorders        | 37.0% (29.7 to 44.4%)                   | 1.2% (-4.2 to 6.7%)                       | 1.6% (-3.7 to 7.0%)                                |
| 14 Colorectal cancer        | 14 Falls                    | 105.4% (84.2 to 118.7%)                 | 51.7% (36.1 to 61.6%)                     | 21.9% (10.1 to 28.9%)                              |
| 15 Neck pain                | 15 Motor vehicle road inj   | -16.2% (-24.4 to -7.8%)                 | -38.1% (-44.1 to -31.9%)                  | -37.2% (-43.3 to -30.9%)                           |
| 16 Breast cancer            | 16 Lower respiratory infect | 49.4% (33.5 to 67.6%)                   | 10.4% (-1.4 to 23.8%)                     | -15.3% (-24.2 to -5.5%)                            |
| 17 Lower respiratory infect | 17 Colorectal cancer        | 22.6% (10.8 to 35.1%)                   | -9.4% (-18.1 to -0.2%)                    | -32.2% (-38.7 to -25.2%)                           |
| 18 Opioid use disorders     | 18 Age-related hearing loss | 90.8% (84.4 to 98.5%)                   | 41.0% (36.2 to 46.7%)                     | 9.0% (5.3 to 13.4%)                                |
| 19 Intracerebral hem        | 19 Intracerebral hem        | 37.4% (24.4 to 51.3%)                   | 1.5% (-8.1 to 11.8%)                      | -20.9% (-28.4 to -13.2%)                           |
| 20 Self-harm by firearm     | 20 Breast cancer            | 16.5% (0.7 to 31.2%)                    | -13.9% (-25.6 to -3.1%)                   | -33.3% (-42.2 to -25.0%)                           |
| 21 Falls                    | 21 Diabetes CKD             | 148.5% (131.4 to 167.4%)                | 83.6% (70.9 to 97.5%)                     | 41.3% (31.7 to 51.8%)                              |
| 22 HIV/AIDS other           | 22 Neonatal preterm birth   | -23.7% (-34.3 to -12.9%)                | -43.6% (-51.5 to -35.7%)                  | -32.7% (-41.8 to -23.3%)                           |
| 23 Acne vulgaris            | 23 Osteoarthritis           | 89.9% (80.7 to 100.0%)                  | 40.3% (33.5 to 47.8%)                     | 5.9% (0.6 to 11.6%)                                |
| 24 Alcohol use disorders    | 24 Other cardiovascular     | 32.8% (22.7 to 43.8%)                   | -1.9% (-9.4 to 6.2%)                      | -22.6% (-28.6 to -16.0%)                           |
| 25 Age-related hearing loss | 25 Self-harm by firearm     | 4.1% (-12.9 to 19.2%)                   | -23.1% (-35.6 to -11.9%)                  | -22.3% (-35.0 to -10.9%)                           |
| 27 Other cardiovascular     | 26 Acne vulgaris            |                                         |                                           |                                                    |
| 31 Osteoarthritis           | 27 Alcohol use disorders    |                                         |                                           |                                                    |
| 36 Diabetes CKD             | 63 HIV/AIDS other           |                                         |                                           |                                                    |

**Legend:**

- Communicable, maternal, neonatal and nutritional
- Non-communicable
- Injuries



Top 25 most-detailed causes of DALYs for 1990 and 2016 for both sexes in Washington

| Leading causes 1990         | Leading causes 2016         | Mean % change number of DALYs 1990-2016 | Mean % change all-age DALY rate 1990-2016 | Mean % change age-standardized DALY rate 1990-2016 |
|-----------------------------|-----------------------------|-----------------------------------------|-------------------------------------------|----------------------------------------------------|
| 1 Ischemic heart disease    | 1 Ischemic heart disease    | -13.0% (-20.2 to -5.1%)                 | -41.1% (-46.0 to -35.8%)                  | -54.9% (-58.7 to -50.7%)                           |
| 2 Lung cancer               | 2 Lung cancer               | 27.6% (15.3 to 40.6%)                   | -13.7% (-22.0 to -4.9%)                   | -36.4% (-42.6 to -30.0%)                           |
| 3 Low back pain             | 3 Diabetes                  | 116.5% (101.7 to 132.9%)                | 46.5% (36.4 to 57.6%)                     | 15.7% (8.0 to 24.8%)                               |
| 4 COPD                      | 4 COPD                      | 65.9% (53.2 to 80.4%)                   | 12.2% (3.7 to 22.1%)                      | -13.7% (-20.2 to -6.4%)                            |
| 5 Major depression          | 5 Low back pain             | 41.2% (23.5 to 59.3%)                   | -4.5% (-16.5 to 7.8%)                     | -13.9% (-24.6 to -2.6%)                            |
| 6 Motor vehicle road inj    | 6 Opioid use disorders      | 109.9% (71.1 to 136.4%)                 | 42.0% (15.7 to 59.9%)                     | 52.7% (24.9 to 72.0%)                              |
| 7 Other musculoskeletal     | 7 Major depression          | 40.4% (31.5 to 49.7%)                   | -5.0% (-11.1 to 1.3%)                     | -3.4% (-9.3 to 2.7%)                               |
| 8 Migraine                  | 8 Other musculoskeletal     | 67.4% (53.2 to 84.5%)                   | 13.3% (3.6 to 24.8%)                      | 6.9% (-1.9 to 16.3%)                               |
| 9 Diabetes                  | 9 Alzheimer disease         | 96.0% (77.1 to 117.2%)                  | 32.6% (19.8 to 46.9%)                     | 0.6% (-8.7 to 11.1%)                               |
| 10 Ischemic stroke          | 10 Migraine                 | 46.7% (41.7 to 51.9%)                   | -0.8% (-4.2 to 2.7%)                      | -0.6% (-4.1 to 2.8%)                               |
| 11 Opioid use disorders     | 11 Falls                    | 115.1% (92.5 to 130.6%)                 | 45.5% (30.2 to 56.0%)                     | 17.2% (6.0 to 24.5%)                               |
| 12 Anxiety disorders        | 12 Ischemic stroke          | 44.1% (33.2 to 56.3%)                   | -2.5% (-9.9 to 5.7%)                      | -24.4% (-30.1 to -18.3%)                           |
| 13 Alzheimer disease        | 13 Anxiety disorders        | 51.1% (42.9 to 59.7%)                   | 2.2% (-3.3 to 8.0%)                       | 1.5% (-3.9 to 7.1%)                                |
| 14 Neck pain                | 14 Neck pain                | 68.5% (48.0 to 93.0%)                   | 14.0% (0.1 to 30.5%)                      | -2.9% (-14.7 to 10.9%)                             |
| 15 Falls                    | 15 Age-related hearing loss | 99.8% (92.6 to 108.1%)                  | 35.2% (30.3 to 40.8%)                     | 9.0% (4.9 to 13.7%)                                |
| 16 Colorectal cancer        | 16 Colorectal cancer        | 44.6% (29.9 to 59.3%)                   | -2.2% (-12.1 to 7.8%)                     | -24.3% (-31.9 to -16.8%)                           |
| 17 Breast cancer            | 17 Motor vehicle road inj   | -25.5% (-33.5 to -15.8%)                | -49.6% (-55.0 to -43.0%)                  | -50.7% (-56.0 to -44.2%)                           |
| 18 Self-harm other means    | 18 Self-harm other means    | 52.4% (31.7 to 72.7%)                   | 3.1% (-10.9 to 16.8%)                     | 6.7% (-7.8 to 21.6%)                               |
| 19 Age-related hearing loss | 19 Intracerebral hem        | 52.4% (38.1 to 68.5%)                   | 3.1% (-6.5 to 14.0%)                      | -18.3% (-25.8 to -9.7%)                            |
| 20 Neonatal preterm birth   | 20 Breast cancer            | 25.6% (9.6 to 44.0%)                    | -15.0% (-25.9 to -2.6%)                   | -33.9% (-42.3 to -24.0%)                           |
| 21 Self-harm by firearm     | 21 Alcohol use disorders    | 64.2% (49.7 to 80.5%)                   | 11.1% (1.3 to 22.1%)                      | 8.3% (-0.4 to 18.0%)                               |
| 22 HIV/AIDS other           | 22 Osteoarthritis           | 108.1% (97.8 to 119.1%)                 | 40.8% (33.8 to 48.2%)                     | 9.0% (3.5 to 15.1%)                                |
| 23 Acne vulgaris            | 23 Acne vulgaris            | 31.8% (26.4 to 37.8%)                   | -10.9% (-14.5 to -6.8%)                   | -1.8% (-5.8 to 2.7%)                               |
| 24 Intracerebral hem        | 24 Other cardiovascular     | 48.4% (35.8 to 61.8%)                   | 0.4% (-8.1 to 9.5%)                       | -19.1% (-26.1 to -11.9%)                           |
| 25 Lower respiratory infect | 25 Self-harm by firearm     | 26.1% (1.4 to 45.3%)                    | -14.7% (-31.4 to -1.7%)                   | -16.5% (-33.2 to -3.1%)                            |
| 26 Alcohol use disorders    | 26 Lower respiratory infect |                                         |                                           |                                                    |
| 27 Other cardiovascular     | 32 Neonatal preterm birth   |                                         |                                           |                                                    |
| 31 Osteoarthritis           | 88 HIV/AIDS other           |                                         |                                           |                                                    |

Legend:

- Communicable, maternal, neonatal and nutritional
- Non-communicable
- Injuries

**Top 25 most detailed causes of DALYs for 1990 and 2016 for both sexes in West Virginia**

| Leading causes 1990         | Leading causes 2016         | Mean % change number of DALYs 1990-2016 | Mean % change all-age DALY rate 1990-2016 | Mean % change age-standardized DALY rate 1990-2016 |
|-----------------------------|-----------------------------|-----------------------------------------|-------------------------------------------|----------------------------------------------------|
| 1 Ischemic heart disease    | 1 Ischemic heart disease    | -29.2% (-35.1 to -23.0%)                | -30.5% (-36.3 to -24.4%)                  | -42.8% (-47.7 to -37.5%)                           |
| 2 Lung cancer               | 2 COPD                      | 61.6% (50.3 to 74.4%)                   | 58.7% (47.6 to 71.4%)                     | 26.2% (17.4 to 35.8%)                              |
| 3 COPD                      | 3 Lung cancer               | 11.0% (0.5 to 23.6%)                    | 9.1% (-1.3 to 21.5%)                      | -15.6% (-23.9 to -6.0%)                            |
| 4 Diabetes                  | 4 Diabetes                  | 60.6% (49.0 to 71.6%)                   | 57.7% (46.3 to 68.6%)                     | 29.3% (20.4 to 38.3%)                              |
| 5 Low back pain             | 5 Opioid use disorders      | 47.9% (7.4 to 73.8%)                    | 45.3% (5.5 to 70.7%)                      | 59.8% (16.6 to 88.6%)                              |
| 6 Motor vehicle road inj    | 6 Low back pain             | 6.5% (-5.4 to 19.6%)                    | 4.6% (-7.0 to 17.4%)                      | -3.8% (-14.8 to 8.4%)                              |
| 7 Opioid use disorders      | 7 Alzheimer disease         | 38.0% (25.1 to 53.2%)                   | 35.5% (22.9 to 50.4%)                     | 6.5% (-3.2 to 17.6%)                               |
| 8 Major depression          | 8 Motor vehicle road inj    | -22.8% (-30.2 to -13.7%)                | -24.1% (-31.5 to -15.2%)                  | -22.5% (-29.9 to -13.3%)                           |
| 9 Alzheimer disease         | 9 Ischemic stroke           | 14.5% (5.2 to 23.5%)                    | 12.5% (3.3 to 21.3%)                      | -10.1% (-16.9 to -3.1%)                            |
| 10 Ischemic stroke          | 10 Major depression         | 3.9% (-2.1 to 10.9%)                    | 2.1% (-3.9 to 8.9%)                       | 4.4% (-1.6 to 11.1%)                               |
| 11 Migraine                 | 11 Other musculoskeletal    | 9.4% (-0.8 to 19.3%)                    | 7.5% (-2.6 to 17.2%)                      | 3.7% (-5.2 to 12.9%)                               |
| 12 Other musculoskeletal    | 12 Colorectal cancer        | 10.8% (-0.7 to 22.2%)                   | 8.8% (-2.5 to 20.1%)                      | -10.4% (-19.8 to -0.9%)                            |
| 13 Colorectal cancer        | 13 Neck pain                | 28.7% (15.4 to 43.3%)                   | 26.4% (13.4 to 40.7%)                     | 8.0% (-3.5 to 20.7%)                               |
| 14 Neck pain                | 14 Falls                    | 63.9% (45.0 to 75.9%)                   | 61.0% (42.4 to 72.8%)                     | 28.8% (15.5 to 37.8%)                              |
| 15 Anxiety disorders        | 15 Migraine                 | -0.5% (-3.7 to 2.6%)                    | -2.2% (-5.4 to 0.7%)                      | -0.9% (-4.3 to 2.3%)                               |
| 16 Lower respiratory infect | 16 Lower respiratory infect | 31.5% (16.9 to 47.2%)                   | 29.2% (14.9 to 44.6%)                     | 6.5% (-3.9 to 18.1%)                               |
| 17 Breast cancer            | 17 Age-related hearing loss | 37.4% (31.6 to 44.1%)                   | 34.9% (29.2 to 41.6%)                     | 10.4% (5.9 to 15.6%)                               |
| 18 Intracerebral hem        | 18 Intracerebral hem        | 30.9% (18.1 to 44.5%)                   | 28.5% (16.0 to 42.0%)                     | 6.2% (-4.2 to 17.5%)                               |
| 19 Falls                    | 19 Anxiety disorders        | 1.9% (-3.5 to 7.4%)                     | 0.1% (-5.2 to 5.5%)                       | 0.5% (-4.7 to 5.9%)                                |
| 20 Self-harm by firearm     | 20 Diabetes CKD             | 114.2% (96.9 to 134.2%)                 | 110.4% (93.4 to 130.0%)                   | 74.5% (60.8 to 90.4%)                              |
| 21 Age-related hearing loss | 21 Self-harm by firearm     | 12.9% (-5.9 to 30.4%)                   | 10.9% (-7.6 to 28.1%)                     | 12.8% (-7.4 to 31.5%)                              |
| 22 Neonatal preterm birth   | 22 Breast cancer            | 0.6% (-11.9 to 16.5%)                   | -1.2% (-13.5 to 14.4%)                    | -18.9% (-29.0 to -6.0%)                            |
| 23 Other cardiovascular     | 23 Endo/metab/blood/immune  | 111.0% (56.7 to 140.7%)                 | 107.3% (53.9 to 136.4%)                   | 83.2% (37.9 to 108.1%)                             |
| 24 Acne vulgaris            | 24 Osteoarthritis           | 42.7% (36.2 to 49.4%)                   | 40.2% (33.8 to 46.8%)                     | 12.1% (6.6 to 17.8%)                               |
| 25 Osteoarthritis           | 25 Other cardiovascular     | 10.6% (2.0 to 20.6%)                    | 8.6% (0.2 to 18.4%)                       | -5.4% (-12.9 to 3.3%)                              |
| 29 Diabetes CKD             | 31 Neonatal preterm birth   |                                         |                                           |                                                    |
| 36 Endo/metab/blood/immune  | 33 Acne vulgaris            |                                         |                                           |                                                    |

**Legend:**

- Communicable, maternal, neonatal and nutritional
- Non-communicable
- Injuries

**Top 25 most detailed causes of DALYs for 1990 and 2016 for both sexes in Wisconsin**

| Leading causes 1990         | Leading causes 2016         | Mean % change number of DALYs 1990-2016 | Mean % change all-age DALY rate 1990-2016 | Mean % change age-standardized DALY rate 1990-2016 |
|-----------------------------|-----------------------------|-----------------------------------------|-------------------------------------------|----------------------------------------------------|
| 1 Ischemic heart disease    | 1 Ischemic heart disease    | -28.1% (-33.5 to -22.1%)                | -39.0% (-43.6 to -34.0%)                  | -51.6% (-55.3 to -47.6%)                           |
| 2 Lung cancer               | 2 Lung cancer               | 27.4% (15.7 to 40.8%)                   | 7.9% (-2.0 to 19.3%)                      | -20.2% (-27.6 to -12.1%)                           |
| 3 Low back pain             | 3 COPD                      | 66.4% (53.9 to 80.4%)                   | 41.0% (30.5 to 52.9%)                     | 10.8% (2.4 to 20.0%)                               |
| 4 Motor vehicle road inj    | 4 Low back pain             | 13.2% (-0.4 to 26.8%)                   | -4.0% (-15.6 to 7.5%)                     | -13.0% (-23.4 to -2.7%)                            |
| 5 Major depression          | 5 Diabetes                  | 55.8% (44.1 to 67.1%)                   | 32.0% (22.1 to 41.7%)                     | 5.5% (-2.3 to 13.0%)                               |
| 6 Diabetes                  | 6 Alzheimer disease         | 48.5% (35.9 to 63.0%)                   | 25.9% (15.2 to 38.2%)                     | -1.0% (-9.2 to 8.2%)                               |
| 7 COPD                      | 7 Falls                     | 94.6% (67.7 to 109.3%)                  | 64.9% (42.2 to 77.4%)                     | 30.5% (15.1 to 39.4%)                              |
| 8 Alzheimer disease         | 8 Major depression          | 17.4% (10.3 to 24.9%)                   | -0.5% (-6.6 to 5.9%)                      | 1.1% (-4.8 to 7.2%)                                |
| 9 Other musculoskeletal     | 9 Other musculoskeletal     | 23.6% (12.4 to 34.8%)                   | 4.7% (-4.7 to 14.2%)                      | -0.4% (-8.4 to 7.7%)                               |
| 10 Migraine                 | 10 Opioid use disorders     | 99.8% (61.9 to 130.7%)                  | 69.3% (37.2 to 95.5%)                     | 88.9% (53.3 to 117.4%)                             |
| 11 Ischemic stroke          | 11 Migraine                 | 16.1% (12.0 to 20.0%)                   | -1.6% (-5.0 to 1.7%)                      | -1.5% (-5.0 to 1.9%)                               |
| 12 Anxiety disorders        | 12 Ischemic stroke          | 16.1% (7.3 to 25.1%)                    | -1.6% (-9.1 to 6.0%)                      | -20.9% (-26.8 to -14.9%)                           |
| 13 Colorectal cancer        | 13 Neck pain                | 38.4% (23.2 to 56.4%)                   | 17.3% (4.4 to 32.5%)                      | -0.9% (-12.3 to 12.4%)                             |
| 14 Neck pain                | 14 Anxiety disorders        | 21.0% (14.6 to 27.4%)                   | 2.5% (-2.9 to 7.9%)                       | 1.4% (-4.2 to 6.5%)                                |
| 15 Falls                    | 15 Age-related hearing loss | 58.7% (52.7 to 65.2%)                   | 34.5% (29.4 to 40.0%)                     | 10.3% (6.1 to 15.3%)                               |
| 16 Breast cancer            | 16 Motor vehicle road inj   | -18.4% (-25.7 to -9.7%)                 | -30.9% (-37.0 to -23.5%)                  | -31.3% (-37.4 to -24.0%)                           |
| 17 Opioid use disorders     | 17 Colorectal cancer        | 2.9% (-6.3 to 13.4%)                    | -12.8% (-20.6 to -3.9%)                   | -31.1% (-37.2 to -23.8%)                           |
| 18 Neonatal preterm birth   | 18 Intracerebral hem        | 30.3% (18.6 to 44.0%)                   | 10.4% (0.5 to 22.1%)                      | -11.9% (-19.6 to -2.8%)                            |
| 19 Age-related hearing loss | 19 Lower respiratory infect | 18.0% (5.6 to 32.4%)                    | 0.0% (-10.5 to 12.2%)                     | -18.5% (-26.5 to -9.3%)                            |
| 20 Lower respiratory infect | 20 Self-harm other means    | 49.5% (29.9 to 70.0%)                   | 26.7% (10.1 to 44.1%)                     | 32.4% (15.0 to 50.7%)                              |
| 21 Intracerebral hem        | 21 Breast cancer            | -2.8% (-14.5 to 10.9%)                  | -17.7% (-27.5 to -6.0%)                   | -36.1% (-43.6 to -27.1%)                           |
| 22 Acne vulgaris            | 22 Alcohol use disorders    | 40.4% (28.1 to 53.9%)                   | 19.0% (8.6 to 30.4%)                      | 15.0% (5.9 to 24.8%)                               |
| 23 Other cardiovascular     | 23 Osteoarthritis           | 56.7% (49.2 to 64.8%)                   | 32.8% (26.4 to 39.6%)                     | 3.6% (-1.6 to 9.2%)                                |
| 24 Self-harm by firearm     | 24 Diabetes CKD             | 122.3% (104.3 to 138.7%)                | 88.4% (73.1 to 102.3%)                    | 52.3% (40.6 to 63.6%)                              |
| 25 Alcohol use disorders    | 25 Other cardiovascular     | 18.3% (8.5 to 28.6%)                    | 0.3% (-8.0 to 9.0%)                       | -17.8% (-24.5 to -10.5%)                           |
| 26 Self-harm other means    | 27 Neonatal preterm birth   |                                         |                                           |                                                    |
| 28 Osteoarthritis           | 28 Acne vulgaris            |                                         |                                           |                                                    |
| 38 Diabetes CKD             | 29 Self-harm by firearm     |                                         |                                           |                                                    |

**Legend:**

- Communicable, maternal, neonatal and nutritional
- Non-communicable
- Injuries

Top 25 most detailed causes of DALYs for 1990 and 2016 for both sexes in Wyoming

| Leading causes 1990         | Leading causes 2016         | Mean % change number of DALYs 1990-2016 | Mean % change all-age DALY rate 1990-2016 | Mean % change age-standardized DALY rate 1990-2016 |
|-----------------------------|-----------------------------|-----------------------------------------|-------------------------------------------|----------------------------------------------------|
| 1 Ischemic heart disease    | 1 Ischemic heart disease    | 0.8% (-11.1 to 13.7%)                   | -21.2% (-30.5 to -11.2%)                  | -44.1% (-50.9 to -36.9%)                           |
| 2 Low back pain             | 2 COPD                      | 85.4% (68.9 to 104.3%)                  | 44.9% (32.0 to 59.6%)                     | 2.1% (-7.2 to 12.8%)                               |
| 3 Motor vehicle road inj    | 3 Low back pain             | 47.1% (32.6 to 61.9%)                   | 15.0% (3.6 to 26.6%)                      | 3.2% (-7.3 to 13.8%)                               |
| 4 COPD                      | 4 Lung cancer               | 38.1% (20.7 to 56.5%)                   | 7.9% (-5.7 to 22.3%)                      | -25.5% (-34.7 to -15.6%)                           |
| 5 Lung cancer               | 5 Diabetes                  | 91.2% (74.8 to 107.6%)                  | 49.4% (36.6 to 62.3%)                     | 11.7% (2.2 to 21.5%)                               |
| 6 Major depression          | 6 Major depression          | 27.7% (19.5 to 37.3%)                   | -0.2% (-6.6 to 7.3%)                      | -0.4% (-6.8 to 6.7%)                               |
| 7 Other musculoskeletal     | 7 Motor vehicle road inj    | -1.4% (-13.3 to 12.0%)                  | -22.9% (-32.3 to -12.4%)                  | -24.5% (-33.7 to -13.9%)                           |
| 8 Migraine                  | 8 Other musculoskeletal     | 36.0% (24.0 to 48.6%)                   | 6.3% (-3.1 to 16.2%)                      | -1.8% (-10.4 to 7.3%)                              |
| 9 Diabetes                  | 9 Opioid use disorders      | 313.0% (221.8 to 374.4%)                | 222.8% (151.5 to 270.8%)                  | 238.3% (164.8 to 288.4%)                           |
| 10 Self-harm by firearm     | 10 Alzheimer disease        | 86.3% (67.6 to 105.7%)                  | 45.6% (31.0 to 60.8%)                     | -0.8% (-10.7 to 9.5%)                              |
| 11 Neck pain                | 11 Neck pain                | 58.9% (46.4 to 72.0%)                   | 24.2% (14.4 to 34.4%)                     | 3.8% (-3.9 to 11.9%)                               |
| 12 Anxiety disorders        | 12 Falls                    | 117.3% (96.1 to 133.7%)                 | 69.8% (53.2 to 82.6%)                     | 32.3% (19.7 to 42.0%)                              |
| 13 Ischemic stroke          | 13 Migraine                 | 23.8% (19.5 to 28.2%)                   | -3.2% (-6.6 to 0.2%)                      | -3.3% (-6.6 to 0.0%)                               |
| 14 Alzheimer disease        | 14 Self-harm by firearm     | 30.4% (6.6 to 55.4%)                    | 1.9% (-16.7 to 21.5%)                     | -0.9% (-19.0 to 18.0%)                             |
| 15 Colorectal cancer        | 15 Anxiety disorders        | 30.8% (23.6 to 37.8%)                   | 2.2% (-3.4 to 7.7%)                       | 0.9% (-4.6 to 6.2%)                                |
| 16 Alcohol use disorders    | 16 Ischemic stroke          | 42.2% (28.0 to 55.7%)                   | 11.2% (0.0 to 21.7%)                      | -22.1% (-29.9 to -14.7%)                           |
| 17 Falls                    | 17 Alcohol use disorders    | 59.5% (45.1 to 74.9%)                   | 24.6% (13.4 to 36.7%)                     | 18.7% (8.5 to 29.8%)                               |
| 18 Neonatal preterm birth   | 18 Age-related hearing loss | 83.8% (77.0 to 91.6%)                   | 43.6% (38.3 to 49.8%)                     | 6.9% (3.1 to 11.3%)                                |
| 19 Lower respiratory infect | 19 Colorectal cancer        | 43.2% (25.5 to 63.9%)                   | 12.0% (-1.9 to 28.1%)                     | -19.3% (-29.3 to -7.7%)                            |
| 20 Breast cancer            | 20 Lower respiratory infect | 40.6% (21.6 to 60.8%)                   | 9.9% (-4.9 to 25.7%)                      | -16.4% (-27.1 to -4.7%)                            |
| 21 Age-related hearing loss | 21 Self-harm other means    | 87.4% (53.7 to 121.4%)                  | 46.5% (20.1 to 73.0%)                     | 48.9% (21.9 to 76.5%)                              |
| 22 Other cardiovascular     | 22 Intracerebral hem        | 52.5% (34.7 to 72.8%)                   | 19.2% (5.3 to 35.1%)                      | -9.6% (-20.1 to 2.7%)                              |
| 23 Acne vulgaris            | 23 Other cardiovascular     | 44.0% (30.7 to 59.0%)                   | 12.6% (2.1 to 24.3%)                      | -13.6% (-21.6 to -4.9%)                            |
| 24 Intracerebral hem        | 24 Breast cancer            | 23.9% (3.2 to 47.6%)                    | -3.2% (-19.4 to 15.3%)                    | -27.6% (-40.0 to -13.2%)                           |
| 25 Asthma                   | 25 Osteoarthritis           | 90.0% (82.9 to 97.3%)                   | 48.5% (42.9 to 54.2%)                     | 7.4% (3.5 to 11.5%)                                |
| 27 Self-harm other means    | 26 Neonatal preterm birth   |                                         |                                           |                                                    |
| 30 Opioid use disorders     | 28 Acne vulgaris            |                                         |                                           |                                                    |
| 32 Osteoarthritis           | 37 Asthma                   |                                         |                                           |                                                    |

Legend:

- Communicable, maternal, neonatal and nutritional
- Non-communicable
- Injuries
